# Supplementary material
Source: PubMed Central journal article supplement (PMC4047133)
Supplement: NIHMS582297-supplement-Supp_Material.pdf [file NIHMS582297-supplement-Supp_Material.pdf]

**Supplemental Table S1. Raw experimental cleavage data of 18,500 peptides by MPII and FRA3 (0.04, 0.4 and 4  $\mu$ M in triplicate each).**

|         | Buffer_1 | Buffer_2 | Buffer_3 | FRA3_4<br>$\mu$ M_1 | FRA3_4<br>$\mu$ M_2 | FRA3_4<br>$\mu$ M_3 | FRA3_0.4<br>$\mu$ M_1 | FRA3_0.4<br>$\mu$ M_2 | FRA3_0.4<br>$\mu$ M_3 |
|---------|----------|----------|----------|---------------------|---------------------|---------------------|-----------------------|-----------------------|-----------------------|
| BF015   | 14       | 8        | 9        | 11                  | 12                  | 9                   | 16                    | 9                     | 10                    |
| BF016   | 14       | 26       | 19       | 49                  | 54                  | 33                  | 42                    | 54                    | 58                    |
| BF018   | 16       | 14       | 14       | 52                  | 53                  | 33                  | 37                    | 54                    | 47                    |
| BF019   | 33       | 20       | 24       | 43                  | 27                  | 31                  | 36                    | 51                    | 59                    |
| BF024   | 9        | 7        | 7        | 12                  | 18                  | 18                  | 24                    | 19                    | 14                    |
| EP001   | 4        | 13       | 12       | 15                  | 14                  | 10                  | 16                    | 15                    | 16                    |
| EP002   | 11       | 13       | 10       | 22                  | 25                  | 19                  | 27                    | 25                    | 27                    |
| EP003   | 13       | 15       | 19       | 20                  | 13                  | 23                  | 22                    | 29                    | 24                    |
| EP004   | 22       | 23       | 17       | 19                  | 21                  | 25                  | 19                    | 29                    | 15                    |
| EP005   | 20       | 13       | 12       | 13                  | 12                  | 17                  | 13                    | 9                     | 22                    |
| EP006   | 7        | 4        | 0        | 6                   | 4                   | 8                   | 6                     | 10                    | 13                    |
| EP007   | 20       | 27       | 21       | 13                  | 14                  | 21                  | 29                    | 26                    | 27                    |
| EP007m3 | 13       | 12       | 9        | 31                  | 34                  | 27                  | 19                    | 17                    | 27                    |
| EP007m4 | 16       | 13       | 18       | 43                  | 41                  | 33                  | 27                    | 24                    | 27                    |
| EP007m5 | 19       | 33       | 29       | 27                  | 29                  | 23                  | 27                    | 33                    | 39                    |
| EP007m6 | 25       | 19       | 24       | 27                  | 37                  | 23                  | 19                    | 31                    | 23                    |
| EP008   | 13       | 20       | 14       | 11                  | 8                   | 18                  | 14                    | 12                    | 9                     |
| F021    | 6        | 9        | 10       | 11                  | 5                   | 10                  | 25                    | 22                    | 19                    |
| MAS001  | 21       | 28       | 27       | 14                  | 14                  | 16                  | 15                    | 11                    | 21                    |
| MAS006  | 48       | 38       | 32       | 39                  | 44                  | 38                  | 36                    | 58                    | 54                    |
| MAS007  | 16       | 10       | 15       | 23                  | 6                   | 15                  | 14                    | 26                    | 20                    |
| MAS008  | 32       | 41       | 30       | 32                  | 32                  | 22                  | 55                    | 59                    | 67                    |
| MAS009  | 42       | 30       | 30       | 26                  | 27                  | 28                  | 46                    | 66                    | 71                    |
| MAS013  | 10       | 5        | 12       | 4                   | 5                   | 3                   | 6                     | 8                     | 15                    |
| MAS014  | 19       | 14       | 11       | 41                  | 40                  | 33                  | 29                    | 30                    | 35                    |
| MAS015  | 21       | 25       | 14       | 18                  | 22                  | 22                  | 12                    | 21                    | 8                     |
| MAS017  | 8        | 12       | 5        | 16                  | 13                  | 4                   | 14                    | 14                    | 24                    |
| MAS018  | 10       | 17       | 5        | 3                   | 5                   | 6                   | 5                     | 8                     | 11                    |
| MAS021  | 6        | 9        | 4        | 10                  | 12                  | 7                   | 17                    | 11                    | 12                    |
| MAS023  | 6        | 14       | 6        | 9                   | 4                   | 7                   | 16                    | 10                    | 13                    |
| MAS026  | 6        | 11       | 9        | 23                  | 23                  | 20                  | 26                    | 22                    | 20                    |
| MAS041  | 5        | 12       | 7        | 16                  | 9                   | 14                  | 13                    | 17                    | 9                     |
| MAS053  | 14       | 12       | 14       | 20                  | 7                   | 13                  | 18                    | 24                    | 26                    |
| MAS057  | 144      | 166      | 153      | 58                  | 65                  | 72                  | 134                   | 133                   | 155                   |
| MAS058  | 55       | 44       | 33       | 17                  | 21                  | 22                  | 31                    | 63                    | 59                    |
| MAS059  | 82       | 70       | 55       | 49                  | 41                  | 65                  | 50                    | 72                    | 86                    |

|        |    |    |    |     |     |     |     |     |     |
|--------|----|----|----|-----|-----|-----|-----|-----|-----|
| MMB003 | 10 | 7  | 4  | 3   | 3   | 4   | 6   | 7   | 5   |
| MMB013 | 18 | 14 | 18 | 17  | 10  | 10  | 14  | 22  | 19  |
| MMB015 | 17 | 26 | 17 | 24  | 16  | 11  | 14  | 14  | 23  |
| MMB027 | 29 | 21 | 20 | 23  | 16  | 15  | 24  | 33  | 35  |
| MMB040 | 19 | 15 | 14 | 12  | 10  | 14  | 14  | 20  | 17  |
| MMB044 | 22 | 35 | 19 | 86  | 84  | 81  | 28  | 57  | 63  |
| MMB047 | 14 | 31 | 21 | 21  | 24  | 15  | 26  | 42  | 32  |
| MMB048 | 4  | 14 | 10 | 10  | 8   | 9   | 12  | 13  | 11  |
| MMB056 | 8  | 13 | 9  | 28  | 17  | 20  | 10  | 11  | 16  |
| MMB060 | 34 | 29 | 22 | 18  | 16  | 16  | 19  | 51  | 38  |
| MMB062 | 9  | 11 | 10 | 18  | 12  | 18  | 11  | 22  | 17  |
| MMB064 | 6  | 9  | 6  | 9   | 11  | 11  | 6   | 17  | 17  |
| MMB074 | 14 | 7  | 11 | 18  | 14  | 20  | 27  | 21  | 45  |
| MMB080 | 9  | 7  | 10 | 7   | 5   | 10  | 13  | 11  | 22  |
| MMB081 | 18 | 11 | 9  | 8   | 9   | 4   | 16  | 19  | 14  |
| MMB085 | 17 | 15 | 20 | 20  | 11  | 21  | 17  | 16  | 22  |
| MMB098 | 5  | 11 | 7  | 6   | 8   | 13  | 1   | 12  | 7   |
| MMB108 | 8  | 7  | 13 | 79  | 56  | 56  | 48  | 51  | 40  |
| MMB123 | 16 | 19 | 21 | 21  | 21  | 11  | 14  | 14  | 18  |
| MMB127 | 11 | 11 | 8  | 21  | 18  | 22  | 24  | 24  | 33  |
| MMB134 | 18 | 20 | 11 | 25  | 15  | 16  | 19  | 22  | 31  |
| MMB144 | 12 | 11 | 7  | 14  | 14  | 13  | 11  | 20  | 13  |
| MMB183 | 24 | 21 | 16 | 18  | 16  | 18  | 25  | 31  | 30  |
| MMB191 | 11 | 13 | 10 | 10  | 10  | 14  | 18  | 15  | 21  |
| MMB194 | 15 | 18 | 19 | 13  | 22  | 18  | 16  | 19  | 15  |
| MMB198 | 18 | 12 | 9  | 12  | 12  | 13  | 13  | 17  | 24  |
| MMB209 | 18 | 7  | 7  | 18  | 10  | 5   | 14  | 20  | 23  |
| MMB212 | 19 | 16 | 18 | 22  | 11  | 13  | 24  | 21  | 33  |
| MMB215 | 28 | 23 | 13 | 26  | 16  | 18  | 32  | 44  | 32  |
| MMB226 | 23 | 18 | 23 | 22  | 25  | 21  | 24  | 35  | 19  |
| MMB251 | 14 | 14 | 6  | 10  | 7   | 22  | 24  | 12  | 20  |
| MMB256 | 10 | 8  | 12 | 76  | 63  | 52  | 26  | 45  | 31  |
| MMB269 | 29 | 26 | 19 | 320 | 291 | 243 | 154 | 167 | 164 |
| MMB272 | 19 | 19 | 16 | 20  | 16  | 24  | 24  | 41  | 28  |
| MMS004 | 17 | 22 | 19 | 174 | 165 | 120 | 109 | 133 | 121 |
| MMS005 | 2  | 0  | 6  | 8   | 3   | 6   | 8   | 4   | 3   |
| MMS007 | 14 | 18 | 17 | 32  | 32  | 25  | 55  | 49  | 53  |
| MMS016 | 6  | 5  | 6  | 10  | 18  | 10  | 22  | 31  | 35  |
| MMS018 | 6  | 12 | 7  | 58  | 53  | 37  | 28  | 26  | 25  |
| MMS038 | 15 | 11 | 12 | 36  | 37  | 22  | 30  | 39  | 40  |
| MMS039 | 7  | 8  | 12 | 25  | 20  | 19  | 21  | 20  | 30  |

|        |    |    |    |     |     |     |     |     |    |
|--------|----|----|----|-----|-----|-----|-----|-----|----|
| MMS040 | 5  | 11 | 9  | 6   | 6   | 5   | 14  | 11  | 16 |
| MMS053 | 29 | 34 | 26 | 42  | 52  | 39  | 49  | 46  | 43 |
| MMS061 | 23 | 22 | 15 | 18  | 23  | 12  | 17  | 38  | 31 |
| MMS082 | 10 | 10 | 6  | 26  | 17  | 16  | 15  | 19  | 22 |
| MMS086 | 10 | 10 | 11 | 10  | 21  | 17  | 10  | 11  | 15 |
| MMS088 | 42 | 35 | 31 | 48  | 47  | 47  | 30  | 47  | 51 |
| MMS093 | 14 | 27 | 25 | 184 | 177 | 121 | 79  | 96  | 71 |
| MMS096 | 14 | 22 | 22 | 29  | 24  | 24  | 16  | 18  | 32 |
| MMS098 | 18 | 29 | 16 | 26  | 24  | 21  | 33  | 33  | 35 |
| MMS099 | 10 | 21 | 11 | 20  | 8   | 12  | 20  | 20  | 10 |
| MMS102 | 17 | 14 | 12 | 8   | 9   | 14  | 10  | 20  | 26 |
| MMS133 | 8  | 15 | 7  | 18  | 13  | 10  | 11  | 24  | 19 |
| MMS135 | 16 | 19 | 17 | 5   | 11  | 16  | 23  | 23  | 18 |
| MMS146 | 19 | 15 | 16 | 14  | 23  | 17  | 22  | 31  | 27 |
| MMS172 | 17 | 21 | 18 | 158 | 133 | 97  | 65  | 76  | 66 |
| MMS191 | 14 | 4  | 9  | 10  | 15  | 14  | 23  | 27  | 27 |
| MMS197 | 17 | 21 | 25 | 14  | 13  | 12  | 25  | 22  | 25 |
| MMS200 | 15 | 11 | 11 | 14  | 16  | 11  | 13  | 12  | 15 |
| MMS202 | 19 | 10 | 14 | 17  | 15  | 19  | 14  | 18  | 25 |
| MMS208 | 17 | 23 | 14 | 14  | 27  | 17  | 23  | 28  | 22 |
| MMS230 | 45 | 57 | 40 | 44  | 24  | 25  | 69  | 62  | 61 |
| MMS242 | 16 | 20 | 13 | 9   | 10  | 14  | 19  | 14  | 23 |
| MMS243 | 2  | 4  | 6  | 2   | 5   | 1   | 3   | 10  | 7  |
| MMS274 | 21 | 19 | 24 | 153 | 127 | 134 | 100 | 113 | 86 |
| MMS294 | 15 | 19 | 18 | 17  | 14  | 12  | 20  | 21  | 24 |
| MMS298 | 12 | 17 | 13 | 12  | 12  | 14  | 21  | 16  | 28 |
| MMS303 | 22 | 16 | 16 | 15  | 10  | 11  | 19  | 18  | 25 |
| MMS304 | 23 | 31 | 17 | 26  | 29  | 24  | 27  | 31  | 33 |
| MMS312 | 9  | 6  | 2  | 2   | 3   | 6   | 13  | 9   | 9  |
| MMS313 | 9  | 8  | 8  | 6   | 5   | 8   | 7   | 16  | 12 |
| MMS323 | 10 | 24 | 10 | 12  | 10  | 20  | 32  | 32  | 30 |
| MMS327 | 15 | 18 | 17 | 65  | 76  | 67  | 38  | 43  | 25 |
| MMS335 | 17 | 17 | 24 | 38  | 32  | 36  | 25  | 27  | 25 |
| MMS341 | 40 | 32 | 26 | 48  | 38  | 27  | 30  | 41  | 50 |
| MMS354 | 23 | 21 | 22 | 20  | 14  | 19  | 18  | 17  | 27 |
| MMS358 | 12 | 8  | 12 | 9   | 15  | 17  | 17  | 10  | 15 |
| MMS362 | 19 | 17 | 10 | 56  | 61  | 48  | 31  | 46  | 35 |
| MMS371 | 12 | 6  | 15 | 17  | 8   | 18  | 15  | 17  | 16 |
| MMS372 | 23 | 19 | 14 | 17  | 21  | 22  | 26  | 35  | 45 |
| MMS374 | 12 | 12 | 7  | 138 | 98  | 93  | 41  | 57  | 53 |
| MMS396 | 22 | 20 | 21 | 14  | 12  | 10  | 21  | 23  | 34 |

|        |    |    |    |    |    |    |    |    |    |
|--------|----|----|----|----|----|----|----|----|----|
| MMS411 | 13 | 9  | 8  | 22 | 22 | 11 | 13 | 31 | 24 |
| MMS425 | 12 | 25 | 13 | 20 | 15 | 17 | 15 | 30 | 28 |
| MMS429 | 15 | 10 | 10 | 7  | 6  | 11 | 19 | 18 | 21 |
| MMS445 | 11 | 13 | 15 | 7  | 6  | 4  | 5  | 12 | 12 |
| MMS453 | 14 | 10 | 11 | 28 | 30 | 16 | 14 | 23 | 24 |
| MMS463 | 18 | 18 | 12 | 28 | 23 | 18 | 20 | 25 | 21 |
| MMS466 | 12 | 9  | 7  | 10 | 14 | 5  | 10 | 20 | 21 |
| MMS476 | 11 | 14 | 13 | 32 | 18 | 32 | 34 | 37 | 39 |
| MMS477 | 7  | 8  | 12 | 30 | 36 | 15 | 31 | 39 | 41 |
| MMS479 | 6  | 15 | 5  | 19 | 7  | 17 | 28 | 42 | 43 |
| MMS480 | 12 | 8  | 6  | 15 | 11 | 5  | 19 | 26 | 31 |
| MMS481 | 43 | 43 | 50 | 56 | 40 | 40 | 36 | 50 | 37 |
| MMS488 | 19 | 21 | 17 | 16 | 17 | 17 | 13 | 21 | 21 |
| MR1    | 19 | 23 | 20 | 32 | 21 | 24 | 37 | 57 | 47 |
| MR10   | 18 | 17 | 16 | 9  | 11 | 20 | 19 | 8  | 16 |
| MR100  | 11 | 9  | 1  | 8  | 8  | 3  | 11 | 11 | 9  |
| MR1000 | 26 | 28 | 22 | 7  | 16 | 15 | 13 | 31 | 30 |
| MR1001 | 8  | 11 | 11 | 60 | 59 | 37 | 37 | 37 | 40 |
| MR1002 | 16 | 15 | 14 | 33 | 26 | 19 | 27 | 33 | 32 |
| MR1003 | 50 | 39 | 20 | 68 | 83 | 62 | 54 | 64 | 64 |
| MR1004 | 6  | 8  | 11 | 31 | 37 | 37 | 19 | 28 | 27 |
| MR1005 | 32 | 23 | 30 | 42 | 48 | 41 | 58 | 55 | 61 |
| MR1006 | 23 | 14 | 24 | 23 | 20 | 14 | 19 | 29 | 35 |
| MR1007 | 5  | 18 | 8  | 14 | 11 | 11 | 11 | 20 | 10 |
| MR1008 | 12 | 16 | 19 | 34 | 42 | 39 | 30 | 29 | 31 |
| MR1009 | 58 | 54 | 59 | 41 | 53 | 38 | 66 | 94 | 95 |
| MR101  | 17 | 14 | 13 | 20 | 19 | 18 | 15 | 16 | 11 |
| MR1010 | 16 | 28 | 19 | 34 | 30 | 32 | 35 | 42 | 42 |
| MR1011 | 16 | 17 | 18 | 12 | 17 | 17 | 8  | 28 | 11 |
| MR1012 | 25 | 15 | 15 | 31 | 20 | 18 | 20 | 21 | 14 |
| MR1013 | 6  | 3  | 2  | 2  | 3  | 2  | 1  | 2  | 5  |
| MR1014 | 21 | 30 | 46 | 51 | 36 | 38 | 40 | 48 | 54 |
| MR1015 | 9  | 7  | 6  | 22 | 26 | 26 | 14 | 18 | 17 |
| MR1016 | 9  | 10 | 8  | 1  | 5  | 4  | 8  | 9  | 12 |
| MR1017 | 7  | 8  | 7  | 12 | 8  | 6  | 4  | 12 | 18 |
| MR1018 | 39 | 51 | 34 | 52 | 41 | 62 | 26 | 60 | 51 |
| MR1019 | 13 | 12 | 16 | 27 | 26 | 29 | 26 | 25 | 27 |
| MR102  | 33 | 39 | 37 | 61 | 62 | 48 | 46 | 63 | 46 |
| MR1020 | 0  | 1  | 0  | 5  | 3  | 3  | 14 | 11 | 7  |
| MR1021 | 31 | 24 | 28 | 48 | 50 | 37 | 22 | 36 | 46 |
| MR1022 | 16 | 16 | 19 | 69 | 80 | 49 | 47 | 67 | 79 |

|        |    |    |    |      |      |     |     |     |     |
|--------|----|----|----|------|------|-----|-----|-----|-----|
| MR1023 | 29 | 54 | 31 | 30   | 22   | 33  | 31  | 60  | 38  |
| MR1024 | 43 | 29 | 30 | 12   | 22   | 21  | 36  | 37  | 50  |
| MR1025 | 54 | 42 | 50 | 29   | 20   | 33  | 52  | 61  | 37  |
| MR1026 | 20 | 19 | 13 | 44   | 48   | 47  | 26  | 35  | 31  |
| MR1027 | 23 | 20 | 17 | 22   | 18   | 16  | 10  | 25  | 24  |
| MR1028 | 26 | 24 | 24 | 21   | 12   | 18  | 18  | 26  | 22  |
| MR1029 | 12 | 11 | 17 | 7    | 7    | 13  | 21  | 13  | 14  |
| MR103  | 14 | 15 | 9  | 144  | 154  | 132 | 138 | 150 | 164 |
| MR1030 | 19 | 31 | 11 | 168  | 120  | 93  | 86  | 113 | 95  |
| MR1031 | 8  | 6  | 11 | 22   | 12   | 5   | 9   | 24  | 20  |
| MR1032 | 9  | 11 | 11 | 24   | 27   | 22  | 15  | 32  | 23  |
| MR1033 | 22 | 25 | 19 | 71   | 73   | 56  | 63  | 76  | 80  |
| MR1034 | 22 | 26 | 20 | 24   | 25   | 18  | 37  | 46  | 38  |
| MR1035 | 5  | 11 | 13 | 24   | 17   | 21  | 6   | 20  | 17  |
| MR1036 | 10 | 12 | 14 | 21   | 21   | 24  | 35  | 54  | 55  |
| MR1037 | 45 | 47 | 27 | 25   | 35   | 36  | 44  | 47  | 48  |
| MR1038 | 6  | 10 | 10 | 15   | 20   | 13  | 17  | 28  | 27  |
| MR1039 | 11 | 7  | 14 | 23   | 30   | 20  | 11  | 24  | 28  |
| MR104  | 23 | 14 | 9  | 19   | 18   | 21  | 38  | 47  | 51  |
| MR1040 | 27 | 33 | 26 | 1168 | 1108 | 907 | 434 | 594 | 515 |
| MR1041 | 21 | 18 | 15 | 18   | 12   | 17  | 22  | 39  | 36  |
| MR1042 | 36 | 18 | 18 | 10   | 16   | 19  | 24  | 28  | 20  |
| MR1043 | 37 | 30 | 22 | 34   | 28   | 18  | 24  | 42  | 32  |
| MR1044 | 9  | 17 | 16 | 5    | 8    | 12  | 17  | 26  | 22  |
| MR1045 | 18 | 16 | 17 | 44   | 40   | 33  | 29  | 35  | 36  |
| MR1046 | 12 | 11 | 6  | 22   | 13   | 21  | 15  | 28  | 14  |
| MR1047 | 9  | 9  | 5  | 37   | 52   | 41  | 11  | 16  | 11  |
| MR1048 | 19 | 26 | 22 | 24   | 10   | 12  | 13  | 24  | 24  |
| MR1049 | 28 | 20 | 32 | 33   | 37   | 28  | 42  | 59  | 61  |
| MR105  | 29 | 23 | 31 | 41   | 29   | 24  | 30  | 57  | 53  |
| MR1050 | 21 | 18 | 21 | 50   | 43   | 30  | 35  | 47  | 45  |
| MR1051 | 22 | 13 | 21 | 18   | 20   | 11  | 24  | 34  | 24  |
| MR1052 | 18 | 28 | 18 | 30   | 29   | 37  | 30  | 50  | 21  |
| MR1053 | 12 | 13 | 12 | 28   | 38   | 34  | 28  | 27  | 32  |
| MR1054 | 9  | 8  | 7  | 178  | 191  | 160 | 83  | 95  | 81  |
| MR1055 | 9  | 9  | 3  | 9    | 15   | 10  | 11  | 21  | 12  |
| MR1056 | 15 | 17 | 12 | 16   | 16   | 12  | 13  | 17  | 13  |
| MR1057 | 15 | 11 | 19 | 61   | 63   | 60  | 55  | 49  | 63  |
| MR1058 | 30 | 29 | 32 | 164  | 117  | 99  | 73  | 89  | 78  |
| MR1059 | 24 | 20 | 12 | 30   | 44   | 38  | 35  | 50  | 39  |
| MR106  | 26 | 16 | 10 | 21   | 12   | 12  | 26  | 23  | 43  |

|        |     |     |     |     |     |     |     |     |     |
|--------|-----|-----|-----|-----|-----|-----|-----|-----|-----|
| MR1060 | 8   | 8   | 13  | 16  | 8   | 14  | 11  | 10  | 19  |
| MR1061 | 20  | 20  | 14  | 10  | 6   | 6   | 16  | 20  | 27  |
| MR1062 | 31  | 39  | 34  | 76  | 58  | 49  | 70  | 64  | 68  |
| MR1063 | 20  | 22  | 22  | 20  | 21  | 23  | 38  | 35  | 36  |
| MR1064 | 17  | 15  | 13  | 127 | 108 | 100 | 64  | 93  | 102 |
| MR1065 | 18  | 14  | 11  | 15  | 13  | 19  | 23  | 21  | 29  |
| MR1066 | 8   | 10  | 10  | 201 | 181 | 144 | 80  | 125 | 108 |
| MR1067 | 100 | 119 | 104 | 213 | 226 | 174 | 171 | 220 | 208 |
| MR1068 | 9   | 21  | 18  | 166 | 149 | 94  | 84  | 112 | 102 |
| MR1069 | 53  | 47  | 37  | 52  | 62  | 59  | 71  | 83  | 63  |
| MR107  | 30  | 33  | 23  | 330 | 275 | 215 | 120 | 147 | 142 |
| MR1070 | 15  | 22  | 19  | 27  | 25  | 15  | 19  | 19  | 25  |
| MR1071 | 17  | 25  | 19  | 142 | 140 | 101 | 67  | 66  | 68  |
| MR1072 | 18  | 20  | 21  | 206 | 179 | 144 | 76  | 126 | 115 |
| MR1073 | 8   | 10  | 15  | 137 | 111 | 78  | 76  | 77  | 79  |
| MR1074 | 52  | 73  | 47  | 41  | 28  | 33  | 55  | 55  | 63  |
| MR1075 | 14  | 11  | 7   | 197 | 183 | 196 | 106 | 152 | 152 |
| MR1076 | 10  | 10  | 9   | 25  | 7   | 22  | 19  | 15  | 20  |
| MR1077 | 25  | 29  | 26  | 24  | 33  | 20  | 43  | 41  | 48  |
| MR1078 | 3   | 5   | 5   | 7   | 8   | 7   | 24  | 23  | 22  |
| MR1079 | 59  | 64  | 59  | 55  | 47  | 41  | 63  | 78  | 98  |
| MR108  | 11  | 17  | 13  | 33  | 40  | 34  | 31  | 30  | 31  |
| MR1080 | 16  | 23  | 17  | 73  | 60  | 55  | 26  | 44  | 30  |
| MR1081 | 49  | 48  | 47  | 63  | 58  | 52  | 54  | 63  | 58  |
| MR1082 | 13  | 16  | 13  | 10  | 12  | 15  | 10  | 31  | 26  |
| MR1083 | 19  | 22  | 17  | 81  | 53  | 37  | 32  | 53  | 36  |
| MR1084 | 12  | 10  | 5   | 35  | 39  | 28  | 34  | 35  | 29  |
| MR1085 | 27  | 45  | 35  | 25  | 33  | 24  | 50  | 49  | 72  |
| MR1086 | 23  | 34  | 26  | 14  | 15  | 17  | 24  | 35  | 31  |
| MR1087 | 9   | 9   | 21  | 45  | 46  | 30  | 37  | 54  | 49  |
| MR1088 | 28  | 22  | 23  | 86  | 84  | 51  | 93  | 122 | 120 |
| MR1089 | 60  | 59  | 51  | 34  | 33  | 41  | 49  | 49  | 69  |
| MR109  | 16  | 22  | 14  | 150 | 114 | 111 | 81  | 95  | 89  |
| MR1090 | 3   | 7   | 8   | 10  | 14  | 7   | 11  | 13  | 16  |
| MR1091 | 27  | 17  | 24  | 68  | 52  | 50  | 38  | 45  | 48  |
| MR1092 | 5   | 11  | 9   | 4   | 6   | 7   | 11  | 16  | 24  |
| MR1093 | 28  | 35  | 37  | 32  | 37  | 28  | 49  | 55  | 56  |
| MR1094 | 24  | 30  | 26  | 15  | 21  | 9   | 30  | 40  | 41  |
| MR1095 | 10  | 10  | 9   | 27  | 16  | 19  | 17  | 27  | 22  |
| MR1096 | 19  | 21  | 20  | 65  | 59  | 50  | 42  | 52  | 39  |
| MR1097 | 29  | 31  | 24  | 22  | 21  | 23  | 12  | 27  | 29  |

|        |     |     |    |     |     |    |    |     |     |
|--------|-----|-----|----|-----|-----|----|----|-----|-----|
| MR1098 | 2   | 0   | 5  | 7   | 13  | 12 | 8  | 14  | 10  |
| MR1099 | 12  | 2   | 4  | 12  | 6   | 8  | 6  | 15  | 11  |
| MR11   | 11  | 15  | 11 | 11  | 13  | 10 | 9  | 17  | 17  |
| MR110  | 8   | 5   | 9  | 14  | 8   | 14 | 14 | 23  | 25  |
| MR1100 | 15  | 15  | 15 | 45  | 52  | 30 | 20 | 21  | 27  |
| MR1101 | 38  | 31  | 26 | 15  | 17  | 19 | 22 | 39  | 32  |
| MR1102 | 13  | 6   | 10 | 49  | 45  | 40 | 33 | 22  | 33  |
| MR1103 | 21  | 23  | 18 | 31  | 21  | 20 | 15 | 26  | 26  |
| MR1104 | 14  | 20  | 14 | 24  | 19  | 17 | 23 | 35  | 29  |
| MR1105 | 21  | 14  | 21 | 58  | 86  | 57 | 37 | 52  | 33  |
| MR1106 | 16  | 16  | 15 | 20  | 16  | 12 | 27 | 37  | 27  |
| MR1107 | 6   | 16  | 10 | 18  | 27  | 19 | 12 | 21  | 11  |
| MR1108 | 23  | 30  | 32 | 59  | 60  | 57 | 53 | 68  | 58  |
| MR1109 | 13  | 8   | 12 | 22  | 22  | 24 | 14 | 24  | 24  |
| MR111  | 9   | 10  | 16 | 17  | 18  | 27 | 10 | 27  | 19  |
| MR1110 | 12  | 21  | 12 | 35  | 24  | 27 | 21 | 26  | 31  |
| MR1111 | 36  | 29  | 41 | 37  | 36  | 21 | 27 | 43  | 46  |
| MR1112 | 5   | 7   | 3  | 7   | 9   | 5  | 4  | 4   | 4   |
| MR1113 | 13  | 11  | 13 | 15  | 11  | 10 | 16 | 20  | 19  |
| MR1114 | 13  | 7   | 10 | 8   | 7   | 13 | 8  | 16  | 14  |
| MR1115 | 19  | 27  | 20 | 76  | 63  | 46 | 48 | 62  | 65  |
| MR1116 | 31  | 32  | 32 | 31  | 25  | 23 | 34 | 58  | 40  |
| MR1117 | 9   | 6   | 9  | 11  | 24  | 21 | 19 | 26  | 38  |
| MR1118 | 18  | 14  | 19 | 38  | 33  | 32 | 39 | 41  | 44  |
| MR1119 | 26  | 21  | 17 | 78  | 58  | 55 | 53 | 73  | 74  |
| MR112  | 28  | 20  | 19 | 129 | 110 | 56 | 45 | 57  | 59  |
| MR1120 | 32  | 34  | 20 | 32  | 24  | 13 | 36 | 40  | 36  |
| MR1121 | 26  | 32  | 23 | 33  | 21  | 25 | 23 | 37  | 38  |
| MR1122 | 16  | 10  | 16 | 33  | 20  | 29 | 23 | 38  | 33  |
| MR1123 | 15  | 14  | 16 | 21  | 35  | 19 | 21 | 25  | 20  |
| MR1124 | 53  | 64  | 55 | 115 | 97  | 90 | 86 | 103 | 131 |
| MR1125 | 42  | 47  | 44 | 89  | 95  | 78 | 64 | 71  | 99  |
| MR1126 | 47  | 26  | 21 | 68  | 50  | 36 | 40 | 43  | 57  |
| MR1127 | 23  | 27  | 28 | 22  | 28  | 45 | 38 | 35  | 37  |
| MR1128 | 100 | 107 | 82 | 52  | 58  | 64 | 79 | 98  | 111 |
| MR1129 | 12  | 18  | 12 | 18  | 24  | 19 | 19 | 20  | 18  |
| MR113  | 20  | 33  | 21 | 72  | 56  | 58 | 42 | 55  | 58  |
| MR1130 | 22  | 21  | 13 | 26  | 16  | 16 | 31 | 25  | 31  |
| MR1131 | 23  | 23  | 17 | 49  | 33  | 33 | 55 | 54  | 67  |
| MR1132 | 26  | 23  | 27 | 104 | 108 | 89 | 72 | 72  | 57  |
| MR1133 | 20  | 16  | 9  | 34  | 26  | 21 | 20 | 30  | 26  |

|        |     |     |     |     |     |     |     |     |     |
|--------|-----|-----|-----|-----|-----|-----|-----|-----|-----|
| MR1134 | 144 | 140 | 108 | 116 | 95  | 92  | 117 | 164 | 169 |
| MR1135 | 15  | 19  | 13  | 7   | 13  | 13  | 14  | 20  | 18  |
| MR1136 | 16  | 19  | 16  | 10  | 11  | 3   | 11  | 13  | 17  |
| MR1137 | 15  | 11  | 14  | 28  | 17  | 23  | 23  | 25  | 28  |
| MR1138 | 12  | 7   | 6   | 16  | 16  | 8   | 14  | 25  | 21  |
| MR1139 | 18  | 24  | 22  | 27  | 14  | 17  | 41  | 50  | 32  |
| MR114  | 12  | 21  | 10  | 34  | 25  | 34  | 19  | 33  | 31  |
| MR1140 | 6   | 7   | 4   | 21  | 20  | 17  | 14  | 22  | 24  |
| MR1141 | 74  | 61  | 64  | 45  | 41  | 40  | 61  | 70  | 68  |
| MR1142 | 36  | 30  | 24  | 135 | 117 | 105 | 79  | 104 | 103 |
| MR1143 | 45  | 50  | 42  | 150 | 142 | 145 | 99  | 130 | 105 |
| MR1144 | 40  | 34  | 36  | 78  | 79  | 56  | 58  | 59  | 65  |
| MR1145 | 18  | 21  | 15  | 13  | 12  | 4   | 12  | 23  | 16  |
| MR1146 | 0   | 2   | 3   | 2   | 1   | 3   | 6   | 6   | 11  |
| MR1147 | 15  | 14  | 10  | 279 | 232 | 214 | 115 | 119 | 113 |
| MR1148 | 18  | 22  | 17  | 11  | 11  | 16  | 16  | 26  | 24  |
| MR1149 | 31  | 23  | 20  | 37  | 24  | 22  | 8   | 26  | 37  |
| MR115  | 26  | 32  | 22  | 20  | 19  | 18  | 29  | 38  | 38  |
| MR1150 | 16  | 20  | 9   | 65  | 47  | 44  | 19  | 28  | 36  |
| MR1151 | 22  | 41  | 25  | 65  | 69  | 49  | 45  | 55  | 63  |
| MR1152 | 30  | 25  | 18  | 50  | 50  | 42  | 47  | 55  | 64  |
| MR116  | 43  | 38  | 28  | 39  | 24  | 28  | 26  | 29  | 42  |
| MR117  | 23  | 31  | 21  | 25  | 29  | 28  | 32  | 32  | 44  |
| MR118  | 39  | 37  | 33  | 31  | 50  | 40  | 47  | 59  | 59  |
| MR119  | 68  | 79  | 76  | 59  | 59  | 57  | 67  | 86  | 104 |
| MR12   | 24  | 14  | 23  | 22  | 22  | 12  | 19  | 31  | 28  |
| MR120  | 18  | 19  | 19  | 47  | 52  | 39  | 43  | 37  | 34  |
| MR121  | 12  | 10  | 16  | 21  | 16  | 17  | 11  | 23  | 17  |
| MR122  | 28  | 23  | 24  | 92  | 82  | 67  | 40  | 53  | 37  |
| MR123  | 32  | 29  | 49  | 32  | 19  | 27  | 31  | 38  | 39  |
| MR124  | 27  | 32  | 35  | 40  | 38  | 28  | 29  | 48  | 42  |
| MR125  | 9   | 25  | 26  | 22  | 24  | 20  | 51  | 30  | 32  |
| MR126  | 25  | 14  | 15  | 65  | 42  | 50  | 45  | 58  | 40  |
| MR127  | 11  | 9   | 15  | 18  | 13  | 10  | 14  | 25  | 25  |
| MR128  | 10  | 18  | 16  | 7   | 6   | 3   | 15  | 8   | 17  |
| MR129  | 12  | 19  | 21  | 33  | 36  | 30  | 30  | 45  | 37  |
| MR13   | 16  | 15  | 14  | 51  | 46  | 33  | 29  | 46  | 33  |
| MR130  | 32  | 30  | 17  | 38  | 30  | 33  | 41  | 48  | 58  |
| MR131  | 37  | 36  | 40  | 40  | 36  | 31  | 28  | 47  | 49  |
| MR132  | 22  | 33  | 34  | 233 | 200 | 154 | 95  | 107 | 109 |
| MR133  | 29  | 34  | 33  | 37  | 25  | 24  | 43  | 42  | 59  |



|       |    |    |    |     |     |     |     |     |     |
|-------|----|----|----|-----|-----|-----|-----|-----|-----|
| MR134 | 40 | 35 | 41 | 125 | 113 | 104 | 75  | 68  | 84  |
| MR135 | 33 | 36 | 25 | 31  | 38  | 26  | 28  | 40  | 48  |
| MR136 | 25 | 14 | 20 | 63  | 52  | 44  | 37  | 32  | 30  |
| MR137 | 13 | 27 | 18 | 229 | 191 | 155 | 133 | 163 | 147 |
| MR138 | 9  | 6  | 4  | 21  | 10  | 16  | 28  | 24  | 31  |
| MR139 | 17 | 13 | 17 | 13  | 14  | 13  | 17  | 16  | 18  |
| MR14  | 8  | 16 | 12 | 20  | 17  | 17  | 25  | 19  | 21  |
| MR140 | 28 | 21 | 17 | 36  | 24  | 24  | 21  | 36  | 39  |
| MR141 | 60 | 50 | 44 | 126 | 97  | 96  | 122 | 163 | 159 |
| MR142 | 16 | 15 | 13 | 14  | 16  | 12  | 14  | 16  | 16  |
| MR143 | 6  | 13 | 8  | 26  | 15  | 20  | 23  | 26  | 25  |
| MR144 | 9  | 10 | 7  | 11  | 8   | 8   | 15  | 17  | 17  |
| MR145 | 6  | 15 | 12 | 73  | 98  | 50  | 50  | 67  | 52  |
| MR146 | 23 | 14 | 16 | 14  | 15  | 13  | 17  | 25  | 19  |
| MR147 | 32 | 18 | 15 | 31  | 24  | 25  | 43  | 47  | 37  |
| MR148 | 17 | 19 | 15 | 76  | 44  | 50  | 45  | 57  | 47  |
| MR149 | 9  | 20 | 14 | 8   | 9   | 6   | 13  | 23  | 21  |
| MR15  | 30 | 17 | 19 | 55  | 49  | 45  | 39  | 45  | 46  |
| MR150 | 17 | 17 | 7  | 21  | 23  | 22  | 29  | 25  | 16  |
| MR151 | 15 | 12 | 11 | 50  | 50  | 38  | 40  | 55  | 47  |
| MR152 | 27 | 28 | 14 | 39  | 45  | 35  | 52  | 65  | 60  |
| MR153 | 20 | 17 | 14 | 60  | 69  | 61  | 44  | 45  | 47  |
| MR154 | 13 | 13 | 16 | 25  | 22  | 14  | 46  | 62  | 42  |
| MR155 | 31 | 46 | 37 | 24  | 32  | 31  | 32  | 52  | 47  |
| MR156 | 17 | 20 | 24 | 232 | 221 | 184 | 64  | 93  | 80  |
| MR157 | 46 | 32 | 34 | 23  | 24  | 23  | 39  | 39  | 37  |
| MR158 | 15 | 18 | 21 | 15  | 17  | 16  | 17  | 31  | 30  |
| MR159 | 12 | 17 | 14 | 14  | 12  | 19  | 17  | 31  | 37  |
| MR16  | 31 | 26 | 26 | 22  | 18  | 27  | 28  | 30  | 28  |
| MR160 | 6  | 5  | 3  | 10  | 9   | 12  | 15  | 16  | 29  |
| MR161 | 54 | 68 | 48 | 53  | 70  | 52  | 39  | 65  | 45  |
| MR162 | 22 | 29 | 29 | 104 | 79  | 73  | 76  | 79  | 84  |
| MR163 | 7  | 6  | 4  | 13  | 18  | 22  | 19  | 22  | 25  |
| MR164 | 9  | 15 | 12 | 103 | 104 | 68  | 47  | 55  | 57  |
| MR165 | 27 | 15 | 25 | 59  | 57  | 43  | 31  | 35  | 41  |
| MR166 | 28 | 23 | 23 | 46  | 43  | 40  | 47  | 64  | 49  |
| MR167 | 13 | 14 | 16 | 21  | 26  | 22  | 25  | 23  | 12  |
| MR168 | 41 | 52 | 35 | 26  | 30  | 30  | 40  | 50  | 57  |
| MR169 | 22 | 34 | 20 | 850 | 848 | 638 | 295 | 401 | 348 |
| MR17  | 17 | 18 | 18 | 45  | 39  | 40  | 27  | 47  | 43  |
| MR170 | 5  | 7  | 3  | 6   | 7   | 4   | 12  | 5   | 12  |

|       |    |    |    |     |     |     |     |     |     |
|-------|----|----|----|-----|-----|-----|-----|-----|-----|
| MR171 | 16 | 15 | 18 | 29  | 28  | 28  | 18  | 20  | 32  |
| MR172 | 16 | 8  | 10 | 18  | 7   | 18  | 17  | 29  | 28  |
| MR173 | 14 | 8  | 7  | 122 | 125 | 105 | 53  | 85  | 67  |
| MR174 | 20 | 21 | 21 | 19  | 23  | 23  | 35  | 33  | 31  |
| MR175 | 35 | 37 | 28 | 23  | 28  | 20  | 34  | 33  | 37  |
| MR176 | 15 | 27 | 12 | 31  | 18  | 14  | 23  | 21  | 24  |
| MR177 | 14 | 33 | 13 | 33  | 37  | 30  | 43  | 48  | 55  |
| MR178 | 18 | 8  | 6  | 45  | 31  | 34  | 46  | 51  | 40  |
| MR179 | 20 | 12 | 9  | 117 | 104 | 103 | 74  | 90  | 80  |
| MR18  | 10 | 11 | 14 | 12  | 16  | 15  | 12  | 25  | 34  |
| MR180 | 18 | 26 | 17 | 32  | 22  | 15  | 25  | 35  | 36  |
| MR181 | 16 | 13 | 13 | 53  | 53  | 47  | 36  | 42  | 51  |
| MR182 | 40 | 28 | 22 | 30  | 30  | 19  | 65  | 75  | 72  |
| MR183 | 26 | 27 | 21 | 113 | 137 | 87  | 96  | 105 | 100 |
| MR184 | 24 | 22 | 17 | 80  | 71  | 69  | 43  | 58  | 40  |
| MR185 | 26 | 37 | 27 | 203 | 149 | 106 | 48  | 84  | 75  |
| MR186 | 30 | 35 | 20 | 337 | 324 | 278 | 136 | 184 | 167 |
| MR187 | 9  | 5  | 10 | 6   | 10  | 13  | 9   | 8   | 16  |
| MR188 | 35 | 23 | 29 | 28  | 30  | 40  | 51  | 57  | 41  |
| MR189 | 15 | 15 | 19 | 24  | 25  | 31  | 29  | 40  | 33  |
| MR19  | 19 | 26 | 17 | 13  | 20  | 20  | 21  | 28  | 27  |
| MR190 | 16 | 18 | 15 | 10  | 17  | 16  | 14  | 24  | 18  |
| MR191 | 20 | 12 | 15 | 26  | 15  | 14  | 28  | 28  | 28  |
| MR192 | 38 | 33 | 28 | 45  | 37  | 39  | 44  | 67  | 61  |
| MR193 | 31 | 36 | 21 | 60  | 48  | 38  | 35  | 54  | 47  |
| MR194 | 14 | 17 | 11 | 227 | 195 | 146 | 104 | 140 | 114 |
| MR195 | 35 | 46 | 43 | 114 | 75  | 90  | 80  | 89  | 85  |
| MR196 | 22 | 13 | 13 | 139 | 117 | 100 | 74  | 91  | 84  |
| MR197 | 10 | 10 | 4  | 10  | 16  | 10  | 16  | 17  | 16  |
| MR198 | 24 | 25 | 19 | 303 | 274 | 193 | 105 | 126 | 116 |
| MR199 | 28 | 25 | 27 | 77  | 101 | 65  | 71  | 61  | 88  |
| MR2   | 18 | 15 | 16 | 22  | 31  | 29  | 29  | 38  | 22  |
| MR20  | 11 | 24 | 15 | 147 | 125 | 106 | 91  | 119 | 94  |
| MR200 | 20 | 17 | 9  | 38  | 33  | 21  | 27  | 38  | 33  |
| MR201 | 21 | 21 | 14 | 47  | 41  | 35  | 27  | 42  | 31  |
| MR202 | 50 | 61 | 53 | 56  | 75  | 57  | 43  | 59  | 59  |
| MR203 | 31 | 34 | 31 | 69  | 58  | 55  | 35  | 61  | 69  |
| MR204 | 38 | 45 | 35 | 33  | 48  | 38  | 51  | 63  | 74  |
| MR205 | 11 | 11 | 5  | 9   | 11  | 6   | 14  | 12  | 12  |
| MR206 | 55 | 61 | 55 | 38  | 36  | 38  | 69  | 79  | 80  |
| MR207 | 28 | 32 | 23 | 15  | 15  | 13  | 34  | 30  | 30  |

|       |    |    |    |     |     |     |     |     |     |
|-------|----|----|----|-----|-----|-----|-----|-----|-----|
| MR208 | 26 | 17 | 17 | 27  | 28  | 27  | 31  | 44  | 49  |
| MR209 | 35 | 32 | 25 | 24  | 33  | 27  | 30  | 31  | 34  |
| MR21  | 14 | 12 | 11 | 62  | 53  | 41  | 30  | 47  | 45  |
| MR210 | 44 | 51 | 45 | 55  | 59  | 41  | 70  | 94  | 90  |
| MR211 | 62 | 68 | 60 | 151 | 143 | 104 | 102 | 109 | 129 |
| MR212 | 54 | 58 | 65 | 79  | 74  | 64  | 53  | 89  | 69  |
| MR213 | 5  | 4  | 5  | 45  | 51  | 49  | 26  | 32  | 21  |
| MR214 | 22 | 24 | 26 | 48  | 54  | 43  | 29  | 40  | 46  |
| MR215 | 7  | 11 | 21 | 142 | 99  | 78  | 84  | 101 | 91  |
| MR216 | 31 | 41 | 41 | 28  | 22  | 38  | 39  | 41  | 50  |
| MR217 | 13 | 21 | 20 | 26  | 22  | 31  | 23  | 28  | 32  |
| MR218 | 42 | 46 | 49 | 36  | 28  | 42  | 40  | 46  | 47  |
| MR219 | 22 | 16 | 21 | 56  | 40  | 42  | 28  | 59  | 50  |
| MR22  | 49 | 35 | 35 | 35  | 28  | 27  | 39  | 49  | 57  |
| MR220 | 19 | 16 | 11 | 19  | 11  | 13  | 18  | 17  | 19  |
| MR221 | 20 | 23 | 11 | 13  | 18  | 13  | 22  | 22  | 36  |
| MR222 | 18 | 19 | 18 | 46  | 48  | 35  | 30  | 28  | 43  |
| MR223 | 41 | 42 | 47 | 20  | 32  | 15  | 43  | 42  | 57  |
| MR224 | 11 | 6  | 11 | 13  | 15  | 9   | 8   | 11  | 13  |
| MR225 | 21 | 13 | 23 | 20  | 25  | 18  | 23  | 17  | 26  |
| MR226 | 33 | 27 | 29 | 230 | 201 | 140 | 91  | 153 | 125 |
| MR227 | 12 | 27 | 27 | 17  | 12  | 23  | 27  | 30  | 25  |
| MR228 | 5  | 8  | 9  | 24  | 23  | 20  | 27  | 39  | 48  |
| MR229 | 60 | 61 | 50 | 41  | 47  | 38  | 55  | 63  | 50  |
| MR23  | 30 | 25 | 25 | 57  | 66  | 38  | 38  | 48  | 42  |
| MR230 | 33 | 40 | 30 | 48  | 41  | 35  | 53  | 69  | 71  |
| MR231 | 28 | 32 | 38 | 37  | 42  | 33  | 33  | 66  | 55  |
| MR232 | 3  | 0  | 1  | 7   | 2   | 4   | 9   | 7   | 5   |
| MR233 | 58 | 41 | 53 | 30  | 32  | 38  | 60  | 69  | 54  |
| MR234 | 14 | 14 | 15 | 22  | 31  | 25  | 28  | 31  | 25  |
| MR235 | 45 | 47 | 49 | 40  | 25  | 22  | 39  | 59  | 48  |
| MR236 | 8  | 9  | 11 | 5   | 2   | 10  | 6   | 16  | 5   |
| MR237 | 39 | 28 | 31 | 22  | 30  | 35  | 47  | 66  | 54  |
| MR238 | 34 | 34 | 19 | 61  | 57  | 24  | 30  | 49  | 46  |
| MR239 | 28 | 30 | 29 | 68  | 69  | 51  | 64  | 68  | 72  |
| MR24  | 12 | 12 | 17 | 9   | 12  | 12  | 11  | 14  | 25  |
| MR240 | 14 | 18 | 19 | 61  | 37  | 43  | 32  | 40  | 32  |
| MR241 | 91 | 86 | 88 | 46  | 44  | 52  | 84  | 82  | 94  |
| MR242 | 11 | 12 | 11 | 11  | 10  | 17  | 17  | 19  | 20  |
| MR243 | 15 | 15 | 7  | 25  | 10  | 20  | 15  | 24  | 16  |
| MR244 | 19 | 19 | 18 | 41  | 38  | 24  | 18  | 32  | 29  |

|       |    |    |    |     |     |     |     |     |     |
|-------|----|----|----|-----|-----|-----|-----|-----|-----|
| MR245 | 11 | 10 | 6  | 52  | 26  | 33  | 22  | 42  | 28  |
| MR246 | 4  | 6  | 5  | 9   | 12  | 8   | 9   | 19  | 18  |
| MR247 | 18 | 25 | 14 | 16  | 23  | 23  | 16  | 21  | 15  |
| MR248 | 29 | 30 | 23 | 45  | 26  | 36  | 25  | 49  | 29  |
| MR249 | 8  | 11 | 9  | 22  | 14  | 15  | 17  | 30  | 39  |
| MR25  | 32 | 29 | 23 | 36  | 26  | 27  | 18  | 47  | 35  |
| MR250 | 24 | 19 | 21 | 25  | 37  | 26  | 19  | 26  | 25  |
| MR251 | 48 | 64 | 53 | 49  | 35  | 35  | 56  | 84  | 81  |
| MR252 | 15 | 25 | 17 | 37  | 25  | 15  | 21  | 29  | 37  |
| MR253 | 19 | 13 | 14 | 21  | 35  | 15  | 13  | 36  | 25  |
| MR254 | 16 | 17 | 24 | 77  | 55  | 50  | 44  | 57  | 43  |
| MR255 | 3  | 4  | 3  | 4   | 0   | 5   | 8   | 14  | 6   |
| MR256 | 36 | 35 | 28 | 205 | 195 | 170 | 80  | 145 | 108 |
| MR257 | 33 | 37 | 27 | 50  | 50  | 37  | 46  | 61  | 49  |
| MR258 | 23 | 27 | 20 | 32  | 33  | 34  | 27  | 25  | 38  |
| MR259 | 17 | 14 | 12 | 75  | 57  | 56  | 77  | 74  | 84  |
| MR26  | 14 | 13 | 14 | 25  | 24  | 25  | 33  | 55  | 49  |
| MR260 | 26 | 19 | 14 | 29  | 26  | 27  | 25  | 34  | 39  |
| MR261 | 22 | 29 | 20 | 33  | 28  | 25  | 18  | 39  | 30  |
| MR262 | 41 | 34 | 33 | 20  | 28  | 30  | 43  | 48  | 36  |
| MR263 | 24 | 30 | 21 | 153 | 148 | 113 | 67  | 83  | 83  |
| MR264 | 18 | 14 | 13 | 42  | 31  | 36  | 37  | 50  | 38  |
| MR265 | 18 | 20 | 18 | 34  | 31  | 19  | 29  | 34  | 30  |
| MR266 | 45 | 53 | 43 | 30  | 33  | 54  | 59  | 65  | 75  |
| MR267 | 14 | 5  | 5  | 8   | 7   | 9   | 9   | 17  | 15  |
| MR268 | 19 | 12 | 23 | 20  | 21  | 13  | 23  | 22  | 32  |
| MR269 | 16 | 23 | 20 | 96  | 76  | 64  | 60  | 77  | 57  |
| MR27  | 18 | 27 | 24 | 21  | 27  | 29  | 32  | 29  | 37  |
| MR270 | 15 | 18 | 25 | 61  | 57  | 34  | 55  | 53  | 45  |
| MR271 | 25 | 24 | 12 | 23  | 11  | 20  | 21  | 25  | 23  |
| MR272 | 14 | 14 | 13 | 10  | 15  | 11  | 14  | 18  | 21  |
| MR273 | 16 | 12 | 7  | 27  | 22  | 17  | 29  | 35  | 29  |
| MR274 | 25 | 27 | 20 | 16  | 21  | 18  | 21  | 30  | 30  |
| MR275 | 16 | 23 | 13 | 25  | 13  | 21  | 21  | 37  | 36  |
| MR276 | 24 | 22 | 24 | 46  | 55  | 39  | 32  | 66  | 53  |
| MR277 | 29 | 29 | 25 | 41  | 22  | 17  | 31  | 32  | 41  |
| MR278 | 21 | 33 | 26 | 161 | 158 | 155 | 84  | 123 | 95  |
| MR279 | 43 | 38 | 44 | 76  | 73  | 74  | 65  | 83  | 80  |
| MR28  | 26 | 30 | 30 | 584 | 460 | 454 | 242 | 337 | 329 |
| MR280 | 11 | 12 | 9  | 33  | 30  | 30  | 21  | 29  | 29  |
| MR281 | 16 | 20 | 12 | 27  | 22  | 29  | 19  | 32  | 31  |

|       |    |    |    |     |     |     |     |     |     |
|-------|----|----|----|-----|-----|-----|-----|-----|-----|
| MR282 | 50 | 52 | 33 | 24  | 25  | 20  | 33  | 41  | 34  |
| MR283 | 18 | 18 | 10 | 13  | 9   | 8   | 6   | 20  | 24  |
| MR284 | 22 | 30 | 22 | 15  | 15  | 16  | 23  | 25  | 26  |
| MR285 | 9  | 10 | 7  | 8   | 7   | 14  | 4   | 9   | 16  |
| MR286 | 22 | 27 | 24 | 22  | 27  | 37  | 31  | 38  | 45  |
| MR287 | 30 | 26 | 23 | 20  | 10  | 26  | 18  | 47  | 37  |
| MR288 | 21 | 30 | 24 | 58  | 58  | 42  | 41  | 49  | 39  |
| MR289 | 8  | 10 | 5  | 9   | 6   | 7   | 18  | 17  | 21  |
| MR29  | 26 | 28 | 29 | 13  | 18  | 11  | 15  | 33  | 20  |
| MR290 | 12 | 6  | 15 | 8   | 19  | 11  | 40  | 42  | 39  |
| MR291 | 19 | 18 | 14 | 28  | 13  | 27  | 21  | 30  | 36  |
| MR292 | 12 | 12 | 10 | 28  | 32  | 28  | 61  | 51  | 51  |
| MR293 | 29 | 17 | 26 | 318 | 295 | 215 | 270 | 295 | 285 |
| MR294 | 13 | 13 | 10 | 16  | 17  | 11  | 24  | 21  | 26  |
| MR295 | 47 | 56 | 35 | 22  | 18  | 30  | 42  | 57  | 52  |
| MR296 | 24 | 19 | 22 | 8   | 14  | 12  | 33  | 32  | 32  |
| MR297 | 15 | 20 | 15 | 40  | 28  | 26  | 48  | 47  | 52  |
| MR298 | 4  | 4  | 6  | 14  | 12  | 12  | 10  | 13  | 10  |
| MR299 | 46 | 36 | 29 | 70  | 64  | 58  | 53  | 87  | 82  |
| MR3   | 13 | 14 | 11 | 29  | 18  | 27  | 21  | 41  | 40  |
| MR30  | 16 | 18 | 19 | 69  | 55  | 47  | 31  | 42  | 36  |
| MR300 | 13 | 16 | 14 | 15  | 14  | 14  | 23  | 23  | 28  |
| MR301 | 23 | 32 | 32 | 160 | 156 | 126 | 111 | 177 | 173 |
| MR302 | 19 | 16 | 18 | 34  | 29  | 32  | 35  | 31  | 38  |
| MR303 | 7  | 11 | 9  | 14  | 19  | 15  | 10  | 16  | 9   |
| MR304 | 23 | 15 | 23 | 42  | 33  | 25  | 21  | 45  | 40  |
| MR305 | 6  | 0  | 3  | 5   | 7   | 11  | 7   | 7   | 7   |
| MR306 | 9  | 24 | 25 | 19  | 24  | 19  | 26  | 24  | 21  |
| MR307 | 9  | 10 | 9  | 104 | 76  | 73  | 51  | 83  | 74  |
| MR308 | 16 | 8  | 6  | 36  | 55  | 41  | 33  | 36  | 27  |
| MR309 | 18 | 21 | 14 | 33  | 39  | 33  | 43  | 63  | 53  |
| MR31  | 19 | 15 | 12 | 13  | 14  | 12  | 18  | 26  | 16  |
| MR310 | 16 | 11 | 10 | 22  | 23  | 14  | 25  | 27  | 21  |
| MR311 | 5  | 5  | 9  | 16  | 14  | 9   | 6   | 16  | 14  |
| MR312 | 52 | 54 | 39 | 190 | 199 | 164 | 108 | 101 | 75  |
| MR313 | 19 | 25 | 22 | 26  | 24  | 36  | 40  | 40  | 45  |
| MR314 | 6  | 7  | 10 | 17  | 20  | 18  | 12  | 12  | 8   |
| MR315 | 48 | 59 | 44 | 117 | 103 | 89  | 68  | 88  | 83  |
| MR316 | 16 | 12 | 17 | 38  | 28  | 32  | 35  | 31  | 37  |
| MR317 | 7  | 12 | 9  | 20  | 33  | 32  | 12  | 12  | 15  |
| MR318 | 33 | 31 | 33 | 23  | 25  | 24  | 38  | 39  | 59  |

|       |    |    |    |     |     |     |     |     |     |
|-------|----|----|----|-----|-----|-----|-----|-----|-----|
| MR319 | 14 | 21 | 11 | 21  | 10  | 18  | 21  | 18  | 23  |
| MR32  | 27 | 28 | 21 | 26  | 24  | 28  | 35  | 33  | 47  |
| MR320 | 25 | 22 | 20 | 58  | 57  | 55  | 30  | 58  | 54  |
| MR321 | 21 | 27 | 26 | 16  | 13  | 17  | 22  | 39  | 33  |
| MR322 | 15 | 24 | 9  | 50  | 35  | 22  | 31  | 45  | 57  |
| MR323 | 17 | 26 | 17 | 529 | 549 | 459 | 313 | 420 | 370 |
| MR324 | 17 | 21 | 21 | 65  | 52  | 44  | 51  | 53  | 61  |
| MR325 | 35 | 23 | 30 | 114 | 106 | 79  | 54  | 87  | 81  |
| MR326 | 3  | 5  | 2  | 9   | 4   | 6   | 4   | 9   | 7   |
| MR327 | 18 | 18 | 13 | 33  | 21  | 21  | 24  | 20  | 24  |
| MR328 | 23 | 20 | 17 | 16  | 26  | 28  | 25  | 31  | 51  |
| MR329 | 12 | 13 | 7  | 19  | 9   | 12  | 12  | 14  | 13  |
| MR33  | 5  | 5  | 8  | 9   | 4   | 5   | 9   | 13  | 11  |
| MR330 | 9  | 13 | 10 | 238 | 244 | 208 | 181 | 195 | 179 |
| MR331 | 15 | 16 | 14 | 10  | 12  | 12  | 16  | 20  | 13  |
| MR332 | 16 | 22 | 17 | 29  | 36  | 27  | 18  | 26  | 29  |
| MR333 | 24 | 26 | 29 | 56  | 63  | 56  | 33  | 30  | 51  |
| MR334 | 18 | 21 | 11 | 13  | 11  | 13  | 15  | 21  | 22  |
| MR335 | 17 | 12 | 11 | 19  | 26  | 16  | 19  | 20  | 19  |
| MR336 | 51 | 45 | 47 | 44  | 40  | 31  | 52  | 70  | 74  |
| MR337 | 18 | 15 | 8  | 12  | 5   | 5   | 19  | 24  | 26  |
| MR338 | 12 | 6  | 7  | 41  | 47  | 55  | 20  | 24  | 14  |
| MR339 | 48 | 44 | 44 | 370 | 300 | 237 | 189 | 217 | 189 |
| MR34  | 45 | 54 | 47 | 31  | 35  | 33  | 52  | 64  | 66  |
| MR340 | 8  | 10 | 14 | 6   | 6   | 10  | 21  | 17  | 19  |
| MR341 | 33 | 23 | 19 | 13  | 18  | 28  | 24  | 40  | 37  |
| MR342 | 27 | 26 | 23 | 48  | 44  | 34  | 30  | 55  | 56  |
| MR343 | 18 | 18 | 15 | 113 | 110 | 88  | 84  | 103 | 94  |
| MR344 | 14 | 22 | 13 | 77  | 47  | 38  | 24  | 38  | 25  |
| MR345 | 22 | 22 | 20 | 33  | 33  | 42  | 29  | 36  | 32  |
| MR346 | 2  | 18 | 12 | 31  | 29  | 23  | 23  | 21  | 29  |
| MR347 | 51 | 42 | 45 | 36  | 24  | 33  | 40  | 60  | 72  |
| MR348 | 17 | 17 | 27 | 16  | 17  | 18  | 15  | 19  | 22  |
| MR349 | 81 | 81 | 77 | 43  | 38  | 55  | 72  | 89  | 121 |
| MR35  | 28 | 28 | 21 | 13  | 14  | 24  | 32  | 36  | 32  |
| MR350 | 9  | 5  | 4  | 10  | 3   | 6   | 8   | 17  | 15  |
| MR351 | 26 | 39 | 30 | 106 | 108 | 73  | 67  | 83  | 81  |
| MR352 | 35 | 33 | 22 | 23  | 24  | 31  | 45  | 56  | 56  |
| MR353 | 32 | 54 | 36 | 55  | 33  | 37  | 48  | 80  | 85  |
| MR354 | 25 | 22 | 19 | 20  | 16  | 14  | 18  | 36  | 35  |
| MR355 | 27 | 28 | 28 | 45  | 28  | 38  | 38  | 55  | 51  |

|       |     |     |     |     |     |     |     |     |     |
|-------|-----|-----|-----|-----|-----|-----|-----|-----|-----|
| MR356 | 15  | 14  | 7   | 57  | 72  | 42  | 41  | 50  | 38  |
| MR357 | 12  | 12  | 27  | 43  | 43  | 28  | 39  | 60  | 58  |
| MR358 | 17  | 21  | 26  | 97  | 81  | 54  | 76  | 68  | 72  |
| MR359 | 19  | 20  | 12  | 32  | 37  | 20  | 29  | 28  | 27  |
| MR36  | 34  | 27  | 16  | 164 | 185 | 116 | 91  | 129 | 103 |
| MR360 | 8   | 7   | 10  | 52  | 53  | 41  | 41  | 49  | 31  |
| MR361 | 10  | 13  | 15  | 37  | 33  | 28  | 25  | 40  | 34  |
| MR362 | 7   | 5   | 6   | 22  | 4   | 10  | 7   | 10  | 11  |
| MR363 | 10  | 15  | 10  | 17  | 14  | 12  | 29  | 36  | 28  |
| MR364 | 27  | 29  | 25  | 32  | 34  | 38  | 43  | 55  | 48  |
| MR365 | 23  | 17  | 24  | 64  | 45  | 31  | 45  | 52  | 44  |
| MR366 | 17  | 19  | 13  | 37  | 29  | 24  | 20  | 55  | 44  |
| MR367 | 18  | 18  | 19  | 34  | 31  | 33  | 38  | 54  | 70  |
| MR368 | 33  | 40  | 36  | 57  | 61  | 53  | 76  | 91  | 84  |
| MR369 | 45  | 38  | 29  | 40  | 22  | 30  | 22  | 28  | 40  |
| MR37  | 12  | 13  | 17  | 8   | 13  | 7   | 10  | 17  | 13  |
| MR370 | 24  | 17  | 17  | 29  | 35  | 34  | 19  | 27  | 32  |
| MR371 | 19  | 15  | 17  | 10  | 16  | 16  | 37  | 32  | 41  |
| MR372 | 5   | 10  | 5   | 24  | 23  | 11  | 15  | 15  | 21  |
| MR373 | 15  | 10  | 11  | 75  | 81  | 60  | 56  | 71  | 66  |
| MR374 | 17  | 17  | 21  | 39  | 35  | 20  | 26  | 36  | 34  |
| MR375 | 23  | 22  | 21  | 29  | 20  | 28  | 33  | 39  | 24  |
| MR376 | 26  | 26  | 34  | 49  | 41  | 35  | 33  | 51  | 62  |
| MR377 | 42  | 53  | 41  | 48  | 39  | 31  | 86  | 98  | 99  |
| MR378 | 16  | 27  | 17  | 19  | 6   | 19  | 16  | 23  | 30  |
| MR379 | 14  | 12  | 20  | 41  | 38  | 21  | 21  | 27  | 32  |
| MR38  | 9   | 5   | 6   | 5   | 9   | 10  | 8   | 14  | 13  |
| MR380 | 18  | 22  | 18  | 19  | 10  | 9   | 18  | 28  | 23  |
| MR381 | 24  | 15  | 18  | 31  | 17  | 21  | 13  | 23  | 19  |
| MR382 | 34  | 22  | 30  | 32  | 33  | 25  | 35  | 41  | 40  |
| MR383 | 38  | 40  | 37  | 44  | 33  | 19  | 33  | 55  | 59  |
| MR384 | 5   | 14  | 16  | 18  | 16  | 13  | 20  | 19  | 15  |
| MR385 | 16  | 13  | 11  | 7   | 17  | 12  | 16  | 33  | 29  |
| MR386 | 21  | 16  | 13  | 22  | 23  | 22  | 20  | 23  | 22  |
| MR387 | 6   | 4   | 4   | 15  | 9   | 11  | 14  | 13  | 15  |
| MR388 | 26  | 47  | 40  | 143 | 121 | 104 | 76  | 105 | 100 |
| MR389 | 31  | 42  | 29  | 62  | 48  | 45  | 40  | 52  | 54  |
| MR39  | 131 | 128 | 113 | 118 | 113 | 126 | 118 | 147 | 165 |
| MR390 | 12  | 19  | 24  | 39  | 27  | 35  | 30  | 36  | 36  |
| MR391 | 11  | 9   | 14  | 53  | 53  | 30  | 37  | 56  | 40  |
| MR392 | 8   | 5   | 4   | 15  | 13  | 7   | 10  | 12  | 19  |

|       |    |    |    |     |     |     |    |     |     |
|-------|----|----|----|-----|-----|-----|----|-----|-----|
| MR393 | 57 | 50 | 66 | 50  | 41  | 44  | 82 | 86  | 78  |
| MR394 | 29 | 30 | 36 | 157 | 119 | 108 | 53 | 63  | 65  |
| MR395 | 30 | 40 | 27 | 42  | 38  | 36  | 31 | 40  | 39  |
| MR396 | 15 | 17 | 19 | 22  | 18  | 27  | 34 | 37  | 31  |
| MR397 | 9  | 11 | 15 | 15  | 17  | 14  | 21 | 41  | 26  |
| MR398 | 24 | 18 | 28 | 33  | 42  | 34  | 35 | 50  | 54  |
| MR399 | 33 | 24 | 26 | 61  | 60  | 69  | 45 | 57  | 58  |
| MR4   | 33 | 27 | 27 | 81  | 67  | 51  | 41 | 63  | 64  |
| MR40  | 10 | 13 | 17 | 47  | 51  | 49  | 47 | 43  | 44  |
| MR400 | 15 | 14 | 10 | 19  | 20  | 16  | 26 | 35  | 27  |
| MR401 | 23 | 21 | 15 | 24  | 20  | 18  | 32 | 50  | 51  |
| MR402 | 8  | 17 | 10 | 123 | 114 | 77  | 73 | 63  | 92  |
| MR403 | 18 | 15 | 16 | 37  | 41  | 25  | 30 | 36  | 34  |
| MR404 | 16 | 20 | 9  | 16  | 12  | 21  | 24 | 17  | 27  |
| MR405 | 39 | 48 | 35 | 40  | 35  | 34  | 31 | 47  | 42  |
| MR406 | 9  | 11 | 11 | 37  | 48  | 27  | 20 | 27  | 32  |
| MR407 | 28 | 28 | 21 | 35  | 30  | 35  | 45 | 73  | 77  |
| MR408 | 9  | 11 | 15 | 14  | 25  | 13  | 28 | 34  | 28  |
| MR409 | 12 | 15 | 11 | 19  | 19  | 14  | 13 | 19  | 18  |
| MR41  | 13 | 5  | 11 | 20  | 22  | 21  | 19 | 24  | 21  |
| MR410 | 13 | 21 | 18 | 28  | 28  | 21  | 26 | 46  | 42  |
| MR411 | 20 | 28 | 17 | 24  | 22  | 27  | 20 | 24  | 34  |
| MR412 | 26 | 19 | 21 | 30  | 36  | 37  | 31 | 56  | 48  |
| MR413 | 9  | 10 | 12 | 18  | 21  | 6   | 8  | 16  | 24  |
| MR414 | 15 | 20 | 21 | 45  | 42  | 24  | 42 | 54  | 60  |
| MR415 | 11 | 17 | 17 | 29  | 20  | 17  | 22 | 32  | 29  |
| MR416 | 16 | 12 | 30 | 100 | 97  | 61  | 52 | 58  | 48  |
| MR417 | 19 | 22 | 12 | 9   | 18  | 10  | 22 | 20  | 20  |
| MR418 | 13 | 16 | 9  | 11  | 16  | 23  | 23 | 19  | 18  |
| MR419 | 12 | 15 | 14 | 20  | 20  | 18  | 24 | 23  | 27  |
| MR42  | 74 | 83 | 53 | 55  | 51  | 59  | 88 | 125 | 94  |
| MR420 | 5  | 13 | 13 | 9   | 7   | 14  | 10 | 15  | 22  |
| MR421 | 16 | 15 | 11 | 14  | 17  | 17  | 22 | 28  | 27  |
| MR422 | 14 | 13 | 14 | 21  | 18  | 16  | 12 | 22  | 16  |
| MR423 | 10 | 8  | 11 | 5   | 8   | 3   | 3  | 7   | 8   |
| MR424 | 5  | 17 | 6  | 19  | 18  | 9   | 16 | 21  | 16  |
| MR425 | 6  | 12 | 9  | 7   | 9   | 13  | 7  | 13  | 7   |
| MR426 | 82 | 83 | 68 | 41  | 62  | 54  | 93 | 142 | 110 |
| MR427 | 47 | 41 | 47 | 31  | 50  | 27  | 41 | 44  | 60  |
| MR428 | 11 | 16 | 8  | 26  | 21  | 17  | 28 | 27  | 26  |
| MR429 | 11 | 17 | 17 | 14  | 15  | 10  | 22 | 27  | 22  |



|       |    |    |     |     |     |     |     |     |     |
|-------|----|----|-----|-----|-----|-----|-----|-----|-----|
| MR43  | 30 | 33 | 25  | 141 | 132 | 107 | 63  | 90  | 78  |
| MR430 | 22 | 23 | 15  | 27  | 25  | 23  | 30  | 23  | 32  |
| MR431 | 26 | 30 | 20  | 285 | 259 | 180 | 86  | 90  | 107 |
| MR432 | 9  | 15 | 15  | 15  | 15  | 15  | 12  | 20  | 15  |
| MR433 | 16 | 24 | 14  | 41  | 45  | 37  | 43  | 50  | 46  |
| MR434 | 30 | 26 | 24  | 44  | 46  | 54  | 27  | 66  | 47  |
| MR435 | 17 | 26 | 23  | 47  | 35  | 43  | 28  | 54  | 38  |
| MR436 | 21 | 12 | 10  | 20  | 22  | 22  | 21  | 15  | 35  |
| MR437 | 15 | 11 | 14  | 6   | 6   | 10  | 10  | 22  | 14  |
| MR438 | 53 | 61 | 33  | 681 | 617 | 518 | 311 | 409 | 381 |
| MR439 | 20 | 27 | 19  | 57  | 67  | 54  | 50  | 60  | 69  |
| MR44  | 15 | 11 | 16  | 38  | 34  | 29  | 29  | 29  | 38  |
| MR440 | 8  | 7  | 10  | 6   | 8   | 9   | 9   | 12  | 14  |
| MR441 | 8  | 12 | 12  | 24  | 27  | 33  | 25  | 26  | 31  |
| MR442 | 92 | 95 | 106 | 41  | 57  | 57  | 88  | 109 | 117 |
| MR443 | 37 | 36 | 31  | 33  | 22  | 15  | 36  | 35  | 33  |
| MR444 | 18 | 17 | 11  | 24  | 26  | 23  | 34  | 31  | 37  |
| MR445 | 18 | 11 | 11  | 23  | 21  | 16  | 20  | 26  | 25  |
| MR446 | 17 | 15 | 17  | 18  | 23  | 11  | 24  | 27  | 31  |
| MR447 | 29 | 28 | 19  | 183 | 180 | 183 | 99  | 148 | 130 |
| MR448 | 45 | 37 | 52  | 106 | 86  | 74  | 63  | 94  | 68  |
| MR449 | 19 | 20 | 18  | 25  | 27  | 26  | 30  | 44  | 47  |
| MR45  | 4  | 4  | 6   | 7   | 10  | 9   | 3   | 3   | 5   |
| MR450 | 18 | 11 | 17  | 47  | 30  | 37  | 41  | 49  | 35  |
| MR451 | 22 | 16 | 13  | 146 | 166 | 102 | 57  | 98  | 85  |
| MR452 | 23 | 18 | 20  | 36  | 54  | 28  | 36  | 41  | 37  |
| MR453 | 21 | 24 | 27  | 34  | 28  | 24  | 39  | 38  | 40  |
| MR454 | 45 | 21 | 30  | 36  | 29  | 25  | 31  | 41  | 31  |
| MR455 | 7  | 4  | 4   | 13  | 7   | 4   | 8   | 12  | 14  |
| MR456 | 16 | 6  | 9   | 17  | 19  | 13  | 7   | 16  | 20  |
| MR457 | 10 | 13 | 10  | 25  | 15  | 18  | 31  | 32  | 36  |
| MR458 | 12 | 4  | 13  | 27  | 13  | 16  | 18  | 18  | 26  |
| MR459 | 20 | 18 | 17  | 2   | 15  | 4   | 12  | 12  | 22  |
| MR46  | 5  | 3  | 4   | 2   | 2   | 2   | 1   | 7   | 3   |
| MR460 | 8  | 17 | 13  | 25  | 14  | 18  | 22  | 23  | 28  |
| MR461 | 29 | 21 | 35  | 156 | 171 | 141 | 90  | 90  | 106 |
| MR462 | 13 | 17 | 14  | 26  | 20  | 15  | 30  | 35  | 50  |
| MR463 | 9  | 3  | 12  | 5   | 10  | 11  | 4   | 9   | 25  |
| MR464 | 7  | 5  | 9   | 6   | 8   | 10  | 5   | 12  | 6   |
| MR465 | 25 | 26 | 28  | 24  | 23  | 21  | 26  | 15  | 25  |
| MR466 | 13 | 24 | 10  | 28  | 36  | 16  | 22  | 26  | 27  |

|       |    |    |    |     |     |     |     |     |     |
|-------|----|----|----|-----|-----|-----|-----|-----|-----|
| MR467 | 28 | 11 | 17 | 30  | 24  | 21  | 28  | 34  | 36  |
| MR468 | 47 | 65 | 74 | 39  | 32  | 33  | 41  | 64  | 49  |
| MR469 | 18 | 11 | 11 | 33  | 17  | 22  | 24  | 37  | 23  |
| MR47  | 8  | 17 | 9  | 10  | 8   | 7   | 8   | 10  | 16  |
| MR470 | 5  | 6  | 10 | 38  | 25  | 26  | 23  | 29  | 30  |
| MR471 | 14 | 21 | 16 | 29  | 36  | 31  | 56  | 60  | 70  |
| MR472 | 23 | 30 | 24 | 92  | 71  | 66  | 62  | 96  | 107 |
| MR473 | 35 | 33 | 21 | 80  | 91  | 86  | 60  | 74  | 88  |
| MR474 | 1  | 2  | 5  | 21  | 10  | 14  | 17  | 24  | 27  |
| MR475 | 21 | 21 | 21 | 12  | 16  | 10  | 13  | 15  | 8   |
| MR476 | 15 | 16 | 11 | 30  | 26  | 38  | 37  | 44  | 31  |
| MR477 | 24 | 34 | 29 | 39  | 35  | 29  | 40  | 42  | 53  |
| MR478 | 35 | 30 | 31 | 52  | 40  | 42  | 56  | 67  | 72  |
| MR479 | 44 | 30 | 36 | 59  | 45  | 54  | 75  | 90  | 88  |
| MR48  | 15 | 20 | 16 | 23  | 25  | 19  | 26  | 39  | 45  |
| MR480 | 5  | 10 | 11 | 7   | 3   | 8   | 7   | 17  | 5   |
| MR481 | 65 | 68 | 52 | 128 | 116 | 79  | 85  | 110 | 101 |
| MR482 | 9  | 14 | 11 | 15  | 14  | 24  | 19  | 32  | 34  |
| MR483 | 45 | 39 | 44 | 48  | 41  | 41  | 39  | 48  | 47  |
| MR484 | 25 | 35 | 19 | 953 | 965 | 795 | 401 | 545 | 452 |
| MR485 | 10 | 6  | 10 | 11  | 3   | 6   | 12  | 16  | 11  |
| MR486 | 46 | 52 | 37 | 156 | 149 | 140 | 94  | 102 | 93  |
| MR487 | 12 | 21 | 17 | 6   | 9   | 6   | 26  | 42  | 47  |
| MR488 | 21 | 11 | 8  | 45  | 35  | 54  | 14  | 22  | 23  |
| MR489 | 6  | 5  | 9  | 28  | 15  | 15  | 29  | 40  | 45  |
| MR49  | 23 | 20 | 15 | 23  | 14  | 15  | 28  | 25  | 23  |
| MR490 | 25 | 37 | 27 | 17  | 13  | 20  | 26  | 38  | 23  |
| MR491 | 12 | 33 | 18 | 12  | 27  | 10  | 17  | 23  | 14  |
| MR492 | 28 | 24 | 20 | 21  | 19  | 31  | 26  | 29  | 28  |
| MR493 | 16 | 20 | 33 | 65  | 51  | 44  | 47  | 67  | 48  |
| MR494 | 13 | 13 | 8  | 30  | 34  | 29  | 25  | 40  | 33  |
| MR495 | 26 | 21 | 26 | 50  | 39  | 31  | 32  | 48  | 35  |
| MR496 | 29 | 41 | 33 | 238 | 205 | 161 | 100 | 100 | 140 |
| MR497 | 47 | 53 | 49 | 42  | 22  | 32  | 50  | 80  | 68  |
| MR498 | 27 | 27 | 22 | 23  | 17  | 18  | 24  | 35  | 40  |
| MR499 | 34 | 34 | 38 | 41  | 32  | 21  | 63  | 39  | 48  |
| MR5   | 26 | 20 | 15 | 13  | 16  | 17  | 25  | 25  | 31  |
| MR50  | 28 | 34 | 39 | 36  | 32  | 45  | 42  | 50  | 66  |
| MR500 | 34 | 33 | 20 | 37  | 43  | 32  | 28  | 36  | 38  |
| MR501 | 77 | 61 | 64 | 81  | 78  | 71  | 89  | 98  | 110 |
| MR502 | 15 | 14 | 24 | 38  | 34  | 38  | 24  | 41  | 30  |

|       |    |    |    |     |     |     |     |     |     |
|-------|----|----|----|-----|-----|-----|-----|-----|-----|
| MR503 | 42 | 47 | 44 | 152 | 145 | 90  | 93  | 133 | 120 |
| MR504 | 32 | 20 | 17 | 161 | 155 | 141 | 118 | 150 | 142 |
| MR505 | 29 | 22 | 23 | 19  | 29  | 23  | 28  | 46  | 27  |
| MR506 | 32 | 40 | 32 | 33  | 20  | 22  | 32  | 41  | 35  |
| MR507 | 20 | 15 | 21 | 20  | 8   | 15  | 30  | 29  | 36  |
| MR508 | 48 | 48 | 30 | 46  | 30  | 27  | 25  | 44  | 38  |
| MR509 | 19 | 25 | 18 | 14  | 26  | 20  | 23  | 25  | 24  |
| MR51  | 12 | 11 | 17 | 16  | 24  | 11  | 17  | 23  | 31  |
| MR510 | 19 | 17 | 13 | 39  | 31  | 37  | 53  | 78  | 48  |
| MR511 | 30 | 23 | 24 | 32  | 23  | 26  | 32  | 29  | 33  |
| MR512 | 26 | 19 | 14 | 26  | 20  | 21  | 31  | 31  | 36  |
| MR513 | 63 | 59 | 48 | 61  | 44  | 60  | 76  | 75  | 96  |
| MR514 | 46 | 39 | 43 | 22  | 26  | 29  | 27  | 39  | 25  |
| MR515 | 8  | 9  | 8  | 11  | 14  | 4   | 18  | 15  | 17  |
| MR516 | 39 | 34 | 26 | 44  | 56  | 47  | 40  | 49  | 50  |
| MR517 | 28 | 23 | 34 | 29  | 30  | 26  | 31  | 30  | 26  |
| MR518 | 9  | 19 | 7  | 21  | 21  | 19  | 18  | 19  | 20  |
| MR519 | 16 | 20 | 12 | 25  | 37  | 22  | 28  | 32  | 38  |
| MR52  | 48 | 41 | 43 | 64  | 46  | 40  | 65  | 63  | 67  |
| MR520 | 86 | 71 | 79 | 44  | 43  | 31  | 58  | 85  | 77  |
| MR521 | 16 | 21 | 22 | 212 | 205 | 152 | 74  | 94  | 85  |
| MR522 | 32 | 25 | 23 | 62  | 48  | 42  | 39  | 72  | 59  |
| MR523 | 22 | 14 | 13 | 14  | 14  | 5   | 25  | 32  | 29  |
| MR524 | 5  | 6  | 6  | 2   | 2   | 3   | 3   | 11  | 13  |
| MR525 | 28 | 33 | 23 | 25  | 20  | 19  | 25  | 29  | 25  |
| MR526 | 6  | 9  | 7  | 26  | 24  | 22  | 14  | 19  | 17  |
| MR527 | 20 | 15 | 18 | 25  | 33  | 27  | 16  | 22  | 20  |
| MR528 | 63 | 66 | 47 | 30  | 29  | 23  | 50  | 68  | 52  |
| MR529 | 13 | 13 | 17 | 19  | 14  | 4   | 15  | 20  | 22  |
| MR53  | 20 | 21 | 24 | 32  | 49  | 42  | 27  | 31  | 35  |
| MR530 | 21 | 24 | 13 | 155 | 131 | 102 | 77  | 104 | 98  |
| MR531 | 14 | 20 | 12 | 24  | 26  | 20  | 21  | 25  | 28  |
| MR532 | 14 | 18 | 19 | 147 | 143 | 101 | 64  | 89  | 84  |
| MR533 | 5  | 2  | 3  | 7   | 5   | 5   | 9   | 6   | 3   |
| MR534 | 3  | 7  | 7  | 14  | 8   | 9   | 12  | 13  | 13  |
| MR535 | 26 | 37 | 38 | 64  | 79  | 71  | 68  | 82  | 87  |
| MR536 | 22 | 33 | 25 | 161 | 131 | 75  | 108 | 105 | 81  |
| MR537 | 23 | 32 | 27 | 215 | 156 | 135 | 68  | 85  | 86  |
| MR538 | 55 | 54 | 49 | 47  | 46  | 41  | 49  | 77  | 66  |
| MR539 | 24 | 22 | 18 | 86  | 57  | 66  | 30  | 54  | 53  |
| MR54  | 21 | 18 | 15 | 42  | 47  | 45  | 23  | 38  | 20  |

|       |    |    |    |     |     |     |     |     |     |
|-------|----|----|----|-----|-----|-----|-----|-----|-----|
| MR540 | 24 | 21 | 17 | 27  | 32  | 33  | 42  | 47  | 35  |
| MR541 | 30 | 38 | 31 | 96  | 99  | 78  | 47  | 81  | 66  |
| MR542 | 23 | 26 | 19 | 20  | 17  | 20  | 33  | 39  | 44  |
| MR543 | 17 | 16 | 8  | 412 | 432 | 344 | 184 | 284 | 240 |
| MR544 | 8  | 6  | 10 | 12  | 12  | 14  | 9   | 15  | 11  |
| MR545 | 6  | 3  | 5  | 38  | 32  | 37  | 39  | 29  | 35  |
| MR546 | 14 | 24 | 20 | 106 | 89  | 62  | 61  | 82  | 80  |
| MR547 | 16 | 6  | 12 | 102 | 93  | 66  | 60  | 71  | 72  |
| MR548 | 1  | 1  | 5  | 10  | 4   | 6   | 11  | 10  | 16  |
| MR549 | 11 | 11 | 10 | 12  | 16  | 13  | 15  | 14  | 16  |
| MR55  | 54 | 44 | 42 | 33  | 33  | 38  | 46  | 59  | 77  |
| MR550 | 28 | 27 | 21 | 23  | 14  | 18  | 27  | 33  | 38  |
| MR551 | 43 | 54 | 35 | 59  | 42  | 49  | 58  | 67  | 75  |
| MR552 | 10 | 11 | 9  | 9   | 10  | 16  | 13  | 25  | 22  |
| MR553 | 3  | 1  | 2  | 3   | 4   | 2   | 0   | 6   | 2   |
| MR554 | 27 | 23 | 20 | 13  | 24  | 15  | 21  | 52  | 47  |
| MR555 | 31 | 22 | 27 | 27  | 27  | 27  | 28  | 42  | 42  |
| MR556 | 21 | 20 | 25 | 44  | 50  | 31  | 28  | 39  | 20  |
| MR557 | 26 | 24 | 26 | 220 | 159 | 131 | 136 | 168 | 150 |
| MR558 | 49 | 68 | 52 | 29  | 30  | 33  | 66  | 71  | 77  |
| MR559 | 40 | 41 | 33 | 18  | 24  | 23  | 36  | 46  | 55  |
| MR56  | 22 | 20 | 17 | 11  | 16  | 17  | 25  | 28  | 24  |
| MR560 | 79 | 86 | 71 | 55  | 59  | 43  | 68  | 107 | 85  |
| MR561 | 10 | 8  | 15 | 63  | 54  | 54  | 45  | 49  | 57  |
| MR562 | 21 | 16 | 19 | 23  | 24  | 20  | 30  | 32  | 19  |
| MR563 | 12 | 15 | 13 | 17  | 13  | 20  | 12  | 14  | 9   |
| MR564 | 63 | 49 | 39 | 112 | 72  | 58  | 51  | 59  | 75  |
| MR565 | 17 | 12 | 5  | 22  | 17  | 22  | 27  | 37  | 33  |
| MR566 | 15 | 16 | 11 | 30  | 36  | 41  | 57  | 78  | 60  |
| MR567 | 31 | 30 | 36 | 25  | 26  | 34  | 31  | 44  | 48  |
| MR568 | 14 | 18 | 8  | 39  | 40  | 25  | 32  | 36  | 27  |
| MR569 | 15 | 11 | 13 | 157 | 149 | 135 | 101 | 101 | 103 |
| MR57  | 30 | 26 | 24 | 23  | 17  | 23  | 24  | 26  | 28  |
| MR570 | 16 | 22 | 17 | 29  | 42  | 20  | 18  | 37  | 43  |
| MR571 | 44 | 40 | 42 | 41  | 39  | 40  | 47  | 50  | 25  |
| MR572 | 9  | 5  | 19 | 13  | 14  | 9   | 15  | 14  | 17  |
| MR573 | 10 | 14 | 5  | 141 | 162 | 129 | 66  | 65  | 67  |
| MR574 | 17 | 24 | 12 | 49  | 44  | 44  | 27  | 47  | 40  |
| MR575 | 50 | 52 | 50 | 34  | 38  | 31  | 43  | 65  | 57  |
| MR576 | 17 | 9  | 11 | 3   | 5   | 11  | 16  | 14  | 23  |
| MR577 | 30 | 26 | 34 | 25  | 22  | 21  | 27  | 36  | 45  |

|       |     |     |     |     |     |     |     |     |     |
|-------|-----|-----|-----|-----|-----|-----|-----|-----|-----|
| MR578 | 24  | 23  | 21  | 67  | 53  | 57  | 55  | 70  | 85  |
| MR579 | 17  | 22  | 22  | 130 | 108 | 90  | 93  | 124 | 116 |
| MR58  | 32  | 24  | 44  | 30  | 26  | 25  | 27  | 36  | 47  |
| MR580 | 32  | 44  | 41  | 70  | 68  | 55  | 38  | 49  | 40  |
| MR581 | 12  | 19  | 10  | 13  | 14  | 9   | 6   | 8   | 12  |
| MR582 | 25  | 19  | 29  | 19  | 31  | 16  | 31  | 36  | 22  |
| MR583 | 42  | 46  | 34  | 40  | 26  | 28  | 28  | 32  | 47  |
| MR584 | 26  | 21  | 17  | 43  | 48  | 48  | 25  | 34  | 39  |
| MR585 | 73  | 53  | 51  | 39  | 41  | 35  | 53  | 64  | 66  |
| MR586 | 21  | 18  | 23  | 19  | 22  | 16  | 21  | 31  | 30  |
| MR587 | 8   | 10  | 8   | 11  | 18  | 14  | 9   | 13  | 19  |
| MR588 | 16  | 5   | 16  | 26  | 23  | 20  | 34  | 27  | 31  |
| MR589 | 48  | 46  | 51  | 27  | 36  | 35  | 34  | 52  | 44  |
| MR59  | 20  | 17  | 19  | 35  | 38  | 19  | 32  | 26  | 33  |
| MR590 | 17  | 24  | 27  | 263 | 277 | 228 | 87  | 155 | 121 |
| MR591 | 8   | 8   | 10  | 6   | 16  | 17  | 10  | 19  | 16  |
| MR592 | 7   | 8   | 9   | 9   | 8   | 11  | 15  | 28  | 18  |
| MR593 | 10  | 7   | 20  | 12  | 18  | 16  | 17  | 17  | 22  |
| MR594 | 17  | 13  | 13  | 33  | 33  | 31  | 28  | 36  | 40  |
| MR595 | 70  | 68  | 70  | 163 | 160 | 138 | 114 | 121 | 170 |
| MR596 | 30  | 32  | 36  | 23  | 23  | 26  | 41  | 49  | 46  |
| MR597 | 37  | 41  | 39  | 82  | 57  | 50  | 48  | 59  | 47  |
| MR598 | 125 | 129 | 101 | 83  | 92  | 62  | 104 | 128 | 144 |
| MR599 | 34  | 11  | 27  | 111 | 107 | 83  | 52  | 62  | 48  |
| MR6   | 39  | 41  | 42  | 51  | 46  | 48  | 64  | 66  | 70  |
| MR60  | 15  | 9   | 9   | 22  | 21  | 23  | 18  | 16  | 18  |
| MR600 | 33  | 34  | 33  | 55  | 44  | 44  | 51  | 61  | 45  |
| MR601 | 25  | 52  | 42  | 34  | 32  | 24  | 45  | 39  | 56  |
| MR602 | 5   | 12  | 7   | 11  | 13  | 9   | 12  | 12  | 12  |
| MR603 | 6   | 6   | 6   | 19  | 19  | 11  | 22  | 26  | 21  |
| MR604 | 16  | 19  | 15  | 13  | 10  | 16  | 21  | 20  | 24  |
| MR605 | 5   | 11  | 8   | 16  | 18  | 17  | 11  | 15  | 24  |
| MR606 | 10  | 16  | 9   | 32  | 42  | 29  | 10  | 34  | 22  |
| MR607 | 11  | 8   | 5   | 12  | 10  | 7   | 15  | 21  | 30  |
| MR608 | 57  | 60  | 53  | 102 | 102 | 76  | 72  | 93  | 74  |
| MR609 | 9   | 18  | 19  | 23  | 27  | 29  | 24  | 24  | 37  |
| MR61  | 12  | 18  | 12  | 32  | 38  | 35  | 36  | 31  | 27  |
| MR610 | 30  | 9   | 18  | 18  | 16  | 23  | 27  | 37  | 30  |
| MR611 | 11  | 21  | 2   | 6   | 6   | 8   | 19  | 22  | 30  |
| MR612 | 36  | 49  | 34  | 29  | 19  | 21  | 38  | 47  | 60  |
| MR613 | 11  | 10  | 6   | 30  | 35  | 20  | 19  | 26  | 23  |

|       |    |    |    |     |     |     |     |     |     |
|-------|----|----|----|-----|-----|-----|-----|-----|-----|
| MR614 | 14 | 19 | 13 | 12  | 15  | 18  | 17  | 21  | 16  |
| MR615 | 26 | 17 | 15 | 36  | 40  | 36  | 27  | 34  | 31  |
| MR616 | 17 | 21 | 14 | 73  | 69  | 61  | 66  | 73  | 47  |
| MR617 | 14 | 16 | 24 | 18  | 19  | 19  | 21  | 38  | 38  |
| MR618 | 18 | 22 | 27 | 22  | 16  | 22  | 35  | 31  | 27  |
| MR619 | 4  | 6  | 7  | 90  | 93  | 66  | 52  | 63  | 67  |
| MR62  | 6  | 9  | 8  | 10  | 8   | 6   | 5   | 13  | 5   |
| MR620 | 11 | 15 | 10 | 23  | 25  | 23  | 37  | 41  | 50  |
| MR621 | 22 | 22 | 12 | 346 | 323 | 235 | 201 | 238 | 204 |
| MR622 | 29 | 27 | 27 | 52  | 47  | 29  | 25  | 34  | 36  |
| MR623 | 30 | 42 | 26 | 27  | 30  | 25  | 34  | 42  | 44  |
| MR624 | 17 | 19 | 16 | 37  | 39  | 27  | 19  | 36  | 27  |
| MR625 | 19 | 20 | 20 | 38  | 30  | 24  | 43  | 46  | 47  |
| MR626 | 3  | 3  | 3  | 2   | 3   | 2   | 1   | 5   | 5   |
| MR627 | 10 | 9  | 15 | 29  | 27  | 27  | 26  | 40  | 24  |
| MR628 | 10 | 13 | 12 | 11  | 8   | 14  | 14  | 12  | 18  |
| MR629 | 16 | 10 | 15 | 28  | 11  | 14  | 18  | 21  | 19  |
| MR63  | 12 | 11 | 14 | 34  | 21  | 33  | 32  | 34  | 29  |
| MR630 | 16 | 10 | 13 | 36  | 24  | 17  | 31  | 21  | 24  |
| MR631 | 5  | 12 | 6  | 7   | 7   | 6   | 24  | 25  | 27  |
| MR632 | 77 | 67 | 60 | 42  | 32  | 35  | 63  | 56  | 54  |
| MR633 | 15 | 12 | 17 | 39  | 28  | 36  | 36  | 53  | 44  |
| MR634 | 31 | 22 | 38 | 26  | 24  | 21  | 31  | 34  | 39  |
| MR635 | 11 | 11 | 9  | 10  | 9   | 4   | 15  | 16  | 24  |
| MR636 | 39 | 23 | 30 | 25  | 23  | 26  | 31  | 35  | 31  |
| MR637 | 24 | 24 | 22 | 96  | 69  | 63  | 43  | 48  | 48  |
| MR638 | 56 | 74 | 60 | 40  | 38  | 46  | 60  | 89  | 108 |
| MR639 | 16 | 17 | 14 | 92  | 112 | 65  | 49  | 62  | 68  |
| MR64  | 11 | 10 | 9  | 13  | 9   | 14  | 18  | 30  | 21  |
| MR640 | 47 | 43 | 50 | 24  | 27  | 21  | 26  | 27  | 29  |
| MR641 | 26 | 18 | 23 | 28  | 38  | 26  | 27  | 39  | 33  |
| MR642 | 8  | 14 | 7  | 8   | 8   | 3   | 13  | 13  | 13  |
| MR643 | 11 | 18 | 17 | 19  | 20  | 15  | 22  | 25  | 27  |
| MR644 | 17 | 18 | 15 | 18  | 19  | 33  | 23  | 27  | 35  |
| MR645 | 26 | 32 | 24 | 24  | 23  | 38  | 25  | 38  | 35  |
| MR646 | 28 | 29 | 25 | 104 | 89  | 73  | 53  | 89  | 77  |
| MR647 | 21 | 18 | 21 | 170 | 165 | 96  | 57  | 81  | 94  |
| MR648 | 18 | 6  | 5  | 16  | 21  | 30  | 23  | 34  | 29  |
| MR649 | 10 | 16 | 12 | 42  | 37  | 37  | 24  | 27  | 24  |
| MR65  | 9  | 8  | 17 | 29  | 24  | 22  | 34  | 34  | 33  |
| MR650 | 13 | 12 | 20 | 19  | 17  | 9   | 15  | 26  | 31  |

|       |    |    |    |     |     |     |     |     |     |
|-------|----|----|----|-----|-----|-----|-----|-----|-----|
| MR651 | 35 | 20 | 31 | 311 | 271 | 225 | 145 | 230 | 220 |
| MR652 | 2  | 3  | 2  | 1   | 0   | 1   | 5   | 3   | 7   |
| MR653 | 0  | 0  | 1  | 0   | 1   | 1   | 5   | 7   | 3   |
| MR654 | 7  | 7  | 5  | 13  | 13  | 12  | 15  | 21  | 14  |
| MR655 | 13 | 12 | 11 | 10  | 20  | 10  | 22  | 10  | 13  |
| MR656 | 33 | 39 | 29 | 47  | 61  | 55  | 64  | 66  | 82  |
| MR657 | 29 | 41 | 33 | 53  | 40  | 43  | 44  | 54  | 69  |
| MR658 | 22 | 20 | 15 | 21  | 28  | 20  | 15  | 25  | 26  |
| MR659 | 28 | 28 | 23 | 43  | 34  | 41  | 29  | 32  | 36  |
| MR66  | 28 | 25 | 17 | 58  | 61  | 52  | 48  | 51  | 46  |
| MR660 | 8  | 2  | 4  | 2   | 3   | 7   | 4   | 9   | 2   |
| MR661 | 32 | 26 | 15 | 993 | 921 | 860 | 664 | 806 | 779 |
| MR662 | 19 | 13 | 18 | 24  | 19  | 22  | 21  | 28  | 21  |
| MR663 | 42 | 40 | 38 | 99  | 108 | 92  | 99  | 104 | 125 |
| MR664 | 2  | 4  | 2  | 15  | 10  | 9   | 9   | 5   | 6   |
| MR665 | 32 | 26 | 30 | 383 | 384 | 270 | 119 | 147 | 144 |
| MR666 | 16 | 12 | 15 | 792 | 822 | 690 | 732 | 948 | 859 |
| MR667 | 14 | 14 | 14 | 18  | 19  | 22  | 22  | 17  | 19  |
| MR668 | 14 | 15 | 19 | 26  | 27  | 17  | 33  | 47  | 28  |
| MR669 | 13 | 15 | 16 | 28  | 43  | 31  | 27  | 32  | 33  |
| MR67  | 2  | 3  | 3  | 9   | 4   | 11  | 10  | 9   | 6   |
| MR670 | 16 | 21 | 20 | 53  | 41  | 27  | 31  | 39  | 46  |
| MR671 | 20 | 18 | 16 | 81  | 68  | 56  | 45  | 76  | 66  |
| MR672 | 82 | 90 | 60 | 61  | 69  | 56  | 80  | 113 | 131 |
| MR673 | 30 | 26 | 21 | 31  | 26  | 22  | 22  | 28  | 33  |
| MR674 | 7  | 4  | 7  | 10  | 12  | 16  | 11  | 18  | 11  |
| MR675 | 17 | 12 | 19 | 20  | 14  | 27  | 30  | 50  | 44  |
| MR676 | 37 | 32 | 32 | 221 | 191 | 157 | 161 | 169 | 147 |
| MR677 | 19 | 17 | 15 | 39  | 30  | 31  | 32  | 37  | 35  |
| MR678 | 12 | 8  | 11 | 11  | 12  | 13  | 15  | 26  | 22  |
| MR679 | 37 | 38 | 48 | 26  | 22  | 25  | 42  | 39  | 73  |
| MR68  | 17 | 8  | 16 | 25  | 28  | 23  | 35  | 51  | 42  |
| MR680 | 16 | 14 | 12 | 18  | 11  | 12  | 20  | 25  | 19  |
| MR681 | 29 | 25 | 25 | 166 | 200 | 132 | 80  | 102 | 85  |
| MR682 | 32 | 22 | 25 | 170 | 179 | 129 | 117 | 157 | 159 |
| MR683 | 10 | 10 | 8  | 8   | 15  | 9   | 20  | 19  | 18  |
| MR684 | 37 | 33 | 29 | 136 | 107 | 116 | 73  | 74  | 79  |
| MR685 | 12 | 18 | 8  | 22  | 15  | 15  | 22  | 23  | 12  |
| MR686 | 45 | 34 | 57 | 36  | 22  | 23  | 42  | 55  | 66  |
| MR687 | 18 | 17 | 20 | 18  | 18  | 13  | 25  | 30  | 31  |
| MR688 | 10 | 21 | 15 | 35  | 40  | 34  | 26  | 58  | 43  |

|       |    |    |    |     |     |     |     |     |     |
|-------|----|----|----|-----|-----|-----|-----|-----|-----|
| MR689 | 19 | 21 | 29 | 84  | 83  | 70  | 45  | 60  | 61  |
| MR69  | 8  | 2  | 13 | 5   | 7   | 7   | 9   | 16  | 12  |
| MR690 | 61 | 60 | 39 | 26  | 40  | 50  | 49  | 78  | 75  |
| MR691 | 19 | 22 | 15 | 34  | 29  | 16  | 24  | 33  | 37  |
| MR692 | 15 | 14 | 9  | 89  | 75  | 48  | 63  | 69  | 90  |
| MR693 | 15 | 17 | 22 | 152 | 127 | 104 | 89  | 133 | 124 |
| MR694 | 6  | 10 | 7  | 17  | 10  | 15  | 19  | 23  | 29  |
| MR695 | 9  | 12 | 21 | 29  | 40  | 39  | 22  | 29  | 33  |
| MR696 | 35 | 28 | 29 | 62  | 41  | 41  | 36  | 57  | 64  |
| MR697 | 27 | 22 | 12 | 57  | 58  | 41  | 53  | 56  | 52  |
| MR698 | 15 | 16 | 13 | 11  | 6   | 16  | 20  | 22  | 23  |
| MR699 | 29 | 19 | 22 | 27  | 38  | 19  | 24  | 33  | 44  |
| MR7   | 29 | 44 | 31 | 32  | 35  | 33  | 34  | 53  | 42  |
| MR70  | 38 | 40 | 42 | 49  | 65  | 43  | 37  | 44  | 38  |
| MR700 | 25 | 26 | 20 | 63  | 48  | 31  | 42  | 47  | 49  |
| MR701 | 15 | 13 | 12 | 41  | 41  | 27  | 34  | 31  | 33  |
| MR702 | 11 | 25 | 16 | 34  | 36  | 21  | 32  | 30  | 31  |
| MR703 | 30 | 37 | 24 | 39  | 29  | 21  | 39  | 40  | 46  |
| MR704 | 29 | 30 | 31 | 54  | 49  | 31  | 40  | 41  | 48  |
| MR705 | 13 | 7  | 16 | 20  | 13  | 24  | 21  | 10  | 26  |
| MR706 | 26 | 13 | 17 | 24  | 14  | 22  | 38  | 53  | 49  |
| MR707 | 65 | 72 | 55 | 106 | 94  | 71  | 79  | 150 | 100 |
| MR708 | 23 | 21 | 16 | 63  | 84  | 62  | 58  | 74  | 89  |
| MR709 | 14 | 14 | 13 | 151 | 115 | 81  | 78  | 101 | 84  |
| MR71  | 14 | 10 | 7  | 18  | 8   | 20  | 7   | 18  | 15  |
| MR710 | 29 | 24 | 20 | 116 | 80  | 84  | 42  | 59  | 68  |
| MR711 | 28 | 35 | 33 | 32  | 40  | 42  | 45  | 57  | 66  |
| MR712 | 2  | 12 | 11 | 9   | 7   | 10  | 7   | 9   | 9   |
| MR713 | 21 | 24 | 24 | 15  | 15  | 13  | 33  | 39  | 26  |
| MR714 | 30 | 33 | 21 | 53  | 40  | 18  | 29  | 30  | 35  |
| MR715 | 6  | 3  | 5  | 15  | 11  | 15  | 26  | 31  | 23  |
| MR716 | 16 | 18 | 13 | 38  | 40  | 37  | 38  | 41  | 37  |
| MR717 | 5  | 5  | 6  | 11  | 12  | 9   | 7   | 16  | 10  |
| MR718 | 14 | 9  | 10 | 8   | 18  | 11  | 13  | 24  | 26  |
| MR719 | 14 | 15 | 16 | 6   | 15  | 19  | 20  | 31  | 32  |
| MR72  | 25 | 42 | 33 | 137 | 65  | 67  | 55  | 72  | 70  |
| MR720 | 37 | 36 | 32 | 57  | 48  | 39  | 35  | 59  | 69  |
| MR721 | 4  | 1  | 2  | 7   | 4   | 3   | 6   | 9   | 7   |
| MR722 | 21 | 26 | 22 | 36  | 34  | 32  | 35  | 50  | 37  |
| MR723 | 28 | 33 | 25 | 374 | 358 | 288 | 282 | 409 | 330 |
| MR724 | 33 | 26 | 13 | 264 | 235 | 202 | 130 | 173 | 132 |



|       |     |     |     |     |     |     |     |     |     |
|-------|-----|-----|-----|-----|-----|-----|-----|-----|-----|
| MR725 | 6   | 17  | 10  | 53  | 43  | 29  | 26  | 45  | 21  |
| MR726 | 10  | 9   | 6   | 41  | 21  | 35  | 25  | 38  | 43  |
| MR727 | 22  | 26  | 24  | 25  | 23  | 21  | 14  | 43  | 37  |
| MR728 | 23  | 23  | 25  | 156 | 138 | 95  | 80  | 83  | 77  |
| MR729 | 21  | 28  | 26  | 125 | 132 | 100 | 82  | 139 | 140 |
| MR73  | 40  | 35  | 38  | 24  | 30  | 33  | 37  | 46  | 35  |
| MR730 | 18  | 15  | 13  | 27  | 25  | 23  | 35  | 31  | 45  |
| MR731 | 23  | 21  | 25  | 54  | 44  | 48  | 31  | 52  | 40  |
| MR732 | 16  | 23  | 14  | 9   | 11  | 6   | 28  | 20  | 24  |
| MR733 | 24  | 27  | 21  | 35  | 16  | 23  | 25  | 38  | 31  |
| MR734 | 21  | 15  | 9   | 339 | 360 | 288 | 228 | 304 | 228 |
| MR735 | 130 | 150 | 132 | 83  | 81  | 70  | 130 | 168 | 156 |
| MR736 | 27  | 15  | 18  | 15  | 16  | 22  | 38  | 30  | 37  |
| MR737 | 11  | 12  | 9   | 27  | 33  | 35  | 22  | 39  | 31  |
| MR738 | 20  | 20  | 24  | 40  | 53  | 38  | 37  | 46  | 34  |
| MR739 | 21  | 17  | 14  | 45  | 39  | 49  | 37  | 49  | 55  |
| MR74  | 18  | 26  | 13  | 50  | 40  | 17  | 30  | 40  | 55  |
| MR740 | 55  | 56  | 52  | 35  | 39  | 35  | 48  | 83  | 75  |
| MR741 | 27  | 27  | 26  | 34  | 39  | 39  | 40  | 31  | 36  |
| MR742 | 27  | 18  | 31  | 23  | 25  | 20  | 35  | 36  | 47  |
| MR743 | 19  | 11  | 15  | 123 | 95  | 81  | 80  | 115 | 110 |
| MR744 | 32  | 36  | 22  | 14  | 15  | 29  | 22  | 36  | 25  |
| MR745 | 35  | 34  | 38  | 24  | 29  | 37  | 16  | 34  | 31  |
| MR746 | 33  | 30  | 41  | 38  | 26  | 35  | 36  | 38  | 42  |
| MR747 | 22  | 18  | 19  | 29  | 20  | 16  | 27  | 32  | 26  |
| MR748 | 15  | 9   | 11  | 16  | 11  | 12  | 32  | 37  | 40  |
| MR749 | 17  | 22  | 16  | 22  | 16  | 26  | 19  | 26  | 27  |
| MR75  | 21  | 11  | 11  | 44  | 39  | 27  | 37  | 31  | 32  |
| MR750 | 7   | 13  | 14  | 46  | 43  | 33  | 31  | 40  | 34  |
| MR751 | 8   | 12  | 11  | 14  | 12  | 15  | 25  | 31  | 40  |
| MR752 | 19  | 15  | 19  | 135 | 111 | 89  | 54  | 59  | 72  |
| MR753 | 15  | 15  | 13  | 16  | 17  | 12  | 24  | 44  | 32  |
| MR754 | 15  | 12  | 18  | 12  | 6   | 6   | 19  | 23  | 22  |
| MR755 | 11  | 27  | 13  | 35  | 24  | 22  | 26  | 31  | 32  |
| MR756 | 22  | 21  | 13  | 15  | 18  | 15  | 13  | 26  | 26  |
| MR757 | 11  | 12  | 11  | 21  | 19  | 17  | 21  | 18  | 20  |
| MR758 | 19  | 25  | 21  | 87  | 100 | 61  | 43  | 97  | 86  |
| MR759 | 43  | 35  | 29  | 22  | 31  | 32  | 38  | 28  | 38  |
| MR76  | 13  | 15  | 3   | 8   | 9   | 5   | 15  | 24  | 17  |
| MR760 | 32  | 22  | 26  | 76  | 66  | 49  | 55  | 73  | 58  |
| MR761 | 20  | 13  | 15  | 141 | 155 | 116 | 77  | 99  | 108 |

|       |     |     |     |     |     |     |     |     |     |
|-------|-----|-----|-----|-----|-----|-----|-----|-----|-----|
| MR762 | 4   | 11  | 6   | 15  | 9   | 8   | 20  | 32  | 20  |
| MR763 | 14  | 12  | 8   | 86  | 69  | 42  | 50  | 68  | 78  |
| MR764 | 23  | 23  | 13  | 23  | 27  | 31  | 10  | 30  | 29  |
| MR765 | 80  | 99  | 67  | 75  | 53  | 59  | 87  | 103 | 89  |
| MR766 | 16  | 13  | 10  | 24  | 26  | 22  | 21  | 31  | 29  |
| MR767 | 43  | 32  | 18  | 19  | 12  | 16  | 31  | 35  | 43  |
| MR768 | 15  | 32  | 19  | 100 | 91  | 80  | 92  | 85  | 92  |
| MR769 | 27  | 30  | 25  | 28  | 22  | 29  | 20  | 45  | 34  |
| MR77  | 16  | 7   | 19  | 32  | 28  | 35  | 23  | 42  | 28  |
| MR770 | 33  | 23  | 31  | 29  | 21  | 28  | 31  | 46  | 38  |
| MR771 | 27  | 16  | 20  | 30  | 29  | 32  | 42  | 56  | 51  |
| MR772 | 25  | 39  | 34  | 21  | 18  | 18  | 24  | 28  | 32  |
| MR773 | 39  | 33  | 28  | 62  | 69  | 48  | 51  | 60  | 59  |
| MR774 | 11  | 17  | 21  | 23  | 26  | 20  | 12  | 26  | 20  |
| MR775 | 6   | 11  | 11  | 22  | 21  | 15  | 16  | 21  | 13  |
| MR776 | 21  | 15  | 16  | 19  | 23  | 14  | 29  | 25  | 38  |
| MR777 | 74  | 86  | 66  | 176 | 116 | 114 | 129 | 225 | 194 |
| MR778 | 13  | 7   | 5   | 17  | 16  | 22  | 22  | 31  | 30  |
| MR779 | 10  | 12  | 13  | 8   | 14  | 18  | 18  | 22  | 20  |
| MR78  | 8   | 13  | 7   | 37  | 16  | 18  | 22  | 30  | 29  |
| MR780 | 11  | 13  | 18  | 7   | 10  | 10  | 12  | 16  | 17  |
| MR781 | 29  | 26  | 29  | 37  | 28  | 27  | 24  | 41  | 54  |
| MR782 | 36  | 22  | 26  | 26  | 27  | 31  | 28  | 44  | 43  |
| MR783 | 41  | 31  | 31  | 49  | 39  | 39  | 43  | 57  | 57  |
| MR784 | 21  | 23  | 12  | 31  | 30  | 24  | 28  | 39  | 49  |
| MR785 | 56  | 49  | 37  | 33  | 33  | 35  | 65  | 65  | 78  |
| MR786 | 19  | 19  | 19  | 12  | 14  | 14  | 27  | 35  | 23  |
| MR787 | 9   | 6   | 7   | 124 | 110 | 80  | 46  | 77  | 60  |
| MR788 | 13  | 8   | 8   | 295 | 242 | 266 | 305 | 330 | 337 |
| MR789 | 10  | 12  | 8   | 3   | 3   | 7   | 12  | 18  | 9   |
| MR79  | 10  | 19  | 22  | 28  | 31  | 24  | 39  | 51  | 63  |
| MR790 | 32  | 29  | 42  | 104 | 101 | 83  | 45  | 50  | 72  |
| MR791 | 27  | 23  | 24  | 20  | 17  | 20  | 28  | 20  | 29  |
| MR792 | 28  | 24  | 20  | 15  | 11  | 19  | 18  | 24  | 17  |
| MR793 | 30  | 29  | 25  | 43  | 45  | 27  | 39  | 50  | 46  |
| MR794 | 13  | 15  | 16  | 21  | 24  | 24  | 13  | 17  | 18  |
| MR795 | 75  | 81  | 74  | 37  | 29  | 34  | 81  | 145 | 109 |
| MR796 | 42  | 50  | 28  | 257 | 191 | 150 | 136 | 154 | 170 |
| MR797 | 8   | 10  | 6   | 24  | 22  | 20  | 16  | 18  | 18  |
| MR798 | 197 | 213 | 167 | 77  | 59  | 75  | 143 | 175 | 187 |
| MR799 | 4   | 8   | 6   | 12  | 16  | 4   | 17  | 20  | 19  |

|       |    |    |    |    |    |    |    |    |    |
|-------|----|----|----|----|----|----|----|----|----|
| MR8   | 9  | 17 | 12 | 19 | 12 | 15 | 19 | 24 | 27 |
| MR80  | 11 | 9  | 10 | 22 | 17 | 17 | 26 | 15 | 19 |
| MR800 | 39 | 45 | 34 | 50 | 50 | 39 | 39 | 86 | 62 |
| MR801 | 11 | 18 | 15 | 11 | 9  | 10 | 14 | 25 | 26 |
| MR802 | 10 | 9  | 11 | 7  | 10 | 7  | 10 | 12 | 18 |
| MR803 | 17 | 16 | 16 | 23 | 14 | 22 | 19 | 27 | 42 |
| MR804 | 30 | 39 | 36 | 55 | 49 | 42 | 40 | 54 | 42 |
| MR805 | 10 | 13 | 6  | 37 | 41 | 37 | 42 | 32 | 48 |
| MR806 | 49 | 29 | 32 | 42 | 68 | 46 | 45 | 57 | 62 |
| MR807 | 14 | 19 | 26 | 44 | 40 | 43 | 20 | 37 | 32 |
| MR808 | 20 | 25 | 25 | 19 | 23 | 20 | 26 | 32 | 28 |
| MR809 | 13 | 16 | 23 | 11 | 12 | 15 | 33 | 28 | 26 |
| MR81  | 17 | 28 | 17 | 27 | 18 | 19 | 25 | 41 | 38 |
| MR810 | 20 | 23 | 22 | 31 | 34 | 28 | 18 | 27 | 33 |
| MR811 | 25 | 11 | 9  | 10 | 11 | 15 | 21 | 14 | 25 |
| MR812 | 25 | 27 | 23 | 36 | 27 | 27 | 50 | 74 | 66 |
| MR813 | 26 | 19 | 27 | 30 | 23 | 26 | 24 | 33 | 27 |
| MR814 | 20 | 20 | 19 | 13 | 16 | 16 | 27 | 22 | 25 |
| MR815 | 11 | 15 | 13 | 26 | 23 | 18 | 40 | 53 | 45 |
| MR816 | 28 | 52 | 31 | 52 | 40 | 38 | 33 | 40 | 42 |
| MR817 | 16 | 17 | 15 | 15 | 2  | 11 | 26 | 17 | 22 |
| MR818 | 17 | 11 | 19 | 48 | 29 | 28 | 31 | 36 | 31 |
| MR819 | 14 | 14 | 16 | 35 | 33 | 26 | 56 | 57 | 67 |
| MR82  | 23 | 32 | 34 | 31 | 25 | 20 | 35 | 78 | 64 |
| MR820 | 2  | 4  | 7  | 14 | 18 | 11 | 11 | 10 | 8  |
| MR821 | 41 | 38 | 33 | 28 | 15 | 28 | 34 | 28 | 51 |
| MR822 | 17 | 12 | 13 | 11 | 9  | 8  | 15 | 13 | 13 |
| MR823 | 60 | 54 | 44 | 37 | 26 | 24 | 48 | 51 | 54 |
| MR824 | 10 | 15 | 6  | 27 | 24 | 28 | 18 | 27 | 18 |
| MR825 | 29 | 24 | 28 | 32 | 22 | 28 | 54 | 66 | 66 |
| MR826 | 19 | 27 | 17 | 14 | 24 | 26 | 21 | 28 | 16 |
| MR827 | 17 | 23 | 12 | 47 | 19 | 36 | 16 | 34 | 33 |
| MR828 | 14 | 23 | 17 | 51 | 39 | 32 | 34 | 54 | 42 |
| MR829 | 29 | 26 | 22 | 41 | 30 | 38 | 20 | 23 | 31 |
| MR83  | 9  | 11 | 10 | 17 | 26 | 24 | 20 | 15 | 15 |
| MR830 | 31 | 28 | 27 | 69 | 57 | 56 | 56 | 68 | 78 |
| MR831 | 41 | 27 | 41 | 22 | 24 | 20 | 15 | 32 | 25 |
| MR832 | 7  | 10 | 15 | 12 | 12 | 8  | 36 | 36 | 37 |
| MR833 | 13 | 12 | 19 | 21 | 24 | 20 | 25 | 32 | 31 |
| MR834 | 12 | 14 | 15 | 7  | 8  | 7  | 24 | 31 | 33 |
| MR835 | 31 | 45 | 18 | 59 | 42 | 35 | 41 | 49 | 58 |

|       |    |    |    |     |     |     |    |    |     |
|-------|----|----|----|-----|-----|-----|----|----|-----|
| MR836 | 27 | 34 | 25 | 50  | 44  | 36  | 42 | 45 | 47  |
| MR837 | 27 | 19 | 23 | 21  | 12  | 28  | 36 | 47 | 36  |
| MR838 | 1  | 0  | 2  | 1   | 1   | 6   | 2  | 3  | 1   |
| MR839 | 23 | 30 | 9  | 20  | 29  | 26  | 30 | 43 | 38  |
| MR84  | 21 | 17 | 19 | 26  | 23  | 38  | 32 | 52 | 51  |
| MR840 | 27 | 18 | 19 | 126 | 108 | 98  | 67 | 83 | 87  |
| MR841 | 28 | 22 | 15 | 17  | 12  | 14  | 19 | 23 | 27  |
| MR842 | 10 | 5  | 4  | 66  | 65  | 85  | 22 | 18 | 20  |
| MR843 | 3  | 5  | 7  | 9   | 9   | 7   | 7  | 8  | 13  |
| MR844 | 30 | 26 | 25 | 41  | 30  | 19  | 30 | 59 | 61  |
| MR845 | 33 | 33 | 27 | 31  | 19  | 33  | 51 | 65 | 40  |
| MR846 | 7  | 4  | 6  | 14  | 11  | 10  | 3  | 5  | 7   |
| MR847 | 5  | 8  | 4  | 14  | 13  | 8   | 10 | 14 | 14  |
| MR848 | 37 | 32 | 27 | 62  | 58  | 46  | 35 | 66 | 58  |
| MR849 | 21 | 28 | 23 | 235 | 214 | 165 | 68 | 98 | 81  |
| MR85  | 10 | 9  | 12 | 11  | 6   | 10  | 9  | 22 | 24  |
| MR850 | 14 | 23 | 16 | 15  | 16  | 14  | 17 | 18 | 16  |
| MR851 | 12 | 10 | 14 | 60  | 55  | 37  | 27 | 36 | 32  |
| MR852 | 24 | 19 | 26 | 16  | 14  | 16  | 48 | 37 | 43  |
| MR853 | 25 | 17 | 18 | 7   | 10  | 10  | 15 | 27 | 22  |
| MR854 | 32 | 43 | 31 | 51  | 26  | 38  | 63 | 63 | 38  |
| MR855 | 23 | 27 | 22 | 49  | 35  | 28  | 20 | 37 | 50  |
| MR856 | 9  | 8  | 12 | 8   | 10  | 7   | 12 | 13 | 19  |
| MR857 | 11 | 14 | 16 | 19  | 15  | 13  | 17 | 24 | 20  |
| MR858 | 25 | 29 | 25 | 36  | 27  | 26  | 29 | 35 | 29  |
| MR859 | 10 | 19 | 16 | 58  | 70  | 38  | 59 | 63 | 62  |
| MR86  | 17 | 15 | 13 | 21  | 28  | 14  | 30 | 24 | 23  |
| MR860 | 22 | 21 | 23 | 107 | 71  | 80  | 50 | 59 | 75  |
| MR861 | 15 | 16 | 12 | 7   | 7   | 10  | 16 | 31 | 26  |
| MR862 | 11 | 21 | 24 | 10  | 8   | 12  | 18 | 28 | 39  |
| MR863 | 27 | 35 | 37 | 74  | 57  | 43  | 31 | 53 | 51  |
| MR864 | 19 | 12 | 10 | 15  | 10  | 9   | 19 | 19 | 23  |
| MR865 | 28 | 22 | 18 | 23  | 18  | 14  | 42 | 44 | 37  |
| MR866 | 69 | 77 | 65 | 45  | 45  | 35  | 73 | 66 | 102 |
| MR867 | 9  | 23 | 8  | 37  | 27  | 33  | 29 | 15 | 26  |
| MR868 | 16 | 15 | 19 | 9   | 15  | 14  | 18 | 21 | 27  |
| MR869 | 24 | 20 | 12 | 18  | 11  | 18  | 16 | 19 | 16  |
| MR87  | 12 | 12 | 12 | 39  | 20  | 21  | 25 | 35 | 47  |
| MR870 | 10 | 12 | 8  | 10  | 6   | 7   | 12 | 15 | 18  |
| MR871 | 12 | 12 | 9  | 15  | 15  | 18  | 30 | 43 | 47  |
| MR872 | 40 | 29 | 35 | 46  | 35  | 34  | 45 | 54 | 50  |

|       |    |    |    |     |     |     |     |     |     |
|-------|----|----|----|-----|-----|-----|-----|-----|-----|
| MR873 | 15 | 18 | 12 | 25  | 22  | 23  | 34  | 40  | 31  |
| MR874 | 17 | 25 | 19 | 30  | 37  | 22  | 24  | 35  | 37  |
| MR875 | 9  | 11 | 9  | 9   | 12  | 1   | 14  | 22  | 15  |
| MR876 | 58 | 60 | 46 | 55  | 51  | 49  | 43  | 51  | 59  |
| MR877 | 14 | 10 | 11 | 45  | 29  | 28  | 33  | 27  | 36  |
| MR878 | 8  | 7  | 4  | 6   | 6   | 7   | 7   | 10  | 7   |
| MR879 | 5  | 3  | 7  | 13  | 9   | 8   | 14  | 25  | 18  |
| MR88  | 22 | 22 | 21 | 681 | 617 | 564 | 310 | 409 | 380 |
| MR880 | 29 | 14 | 29 | 37  | 21  | 26  | 19  | 32  | 23  |
| MR881 | 44 | 44 | 47 | 28  | 16  | 27  | 32  | 59  | 61  |
| MR882 | 13 | 27 | 19 | 39  | 44  | 34  | 36  | 42  | 58  |
| MR883 | 39 | 41 | 33 | 35  | 26  | 30  | 53  | 67  | 63  |
| MR884 | 18 | 18 | 28 | 114 | 144 | 129 | 42  | 54  | 47  |
| MR885 | 14 | 22 | 21 | 158 | 117 | 99  | 73  | 99  | 83  |
| MR886 | 11 | 16 | 15 | 14  | 15  | 9   | 11  | 28  | 23  |
| MR887 | 18 | 13 | 29 | 204 | 200 | 160 | 93  | 111 | 104 |
| MR888 | 13 | 26 | 15 | 17  | 23  | 16  | 33  | 44  | 42  |
| MR889 | 0  | 1  | 2  | 2   | 1   | 0   | 3   | 1   | 0   |
| MR89  | 43 | 49 | 54 | 55  | 53  | 45  | 48  | 70  | 57  |
| MR890 | 4  | 6  | 3  | 34  | 22  | 22  | 13  | 10  | 26  |
| MR891 | 14 | 11 | 9  | 4   | 8   | 5   | 10  | 17  | 13  |
| MR892 | 6  | 17 | 12 | 20  | 20  | 16  | 14  | 20  | 18  |
| MR893 | 13 | 10 | 9  | 16  | 7   | 15  | 13  | 19  | 22  |
| MR894 | 13 | 6  | 1  | 15  | 12  | 13  | 15  | 15  | 17  |
| MR895 | 15 | 12 | 7  | 67  | 63  | 45  | 45  | 54  | 64  |
| MR896 | 12 | 19 | 19 | 14  | 10  | 18  | 15  | 19  | 24  |
| MR897 | 9  | 8  | 5  | 3   | 5   | 4   | 11  | 11  | 12  |
| MR898 | 32 | 22 | 19 | 197 | 211 | 146 | 66  | 68  | 83  |
| MR899 | 9  | 18 | 13 | 18  | 21  | 15  | 20  | 35  | 27  |
| MR9   | 15 | 13 | 18 | 27  | 28  | 20  | 29  | 29  | 30  |
| MR90  | 18 | 21 | 26 | 193 | 198 | 155 | 68  | 100 | 89  |
| MR900 | 5  | 2  | 2  | 23  | 7   | 9   | 19  | 16  | 21  |
| MR901 | 8  | 14 | 8  | 18  | 28  | 16  | 16  | 15  | 16  |
| MR902 | 14 | 17 | 18 | 29  | 24  | 18  | 25  | 50  | 38  |
| MR903 | 19 | 28 | 22 | 29  | 21  | 16  | 25  | 30  | 20  |
| MR904 | 17 | 14 | 13 | 35  | 17  | 12  | 26  | 35  | 25  |
| MR905 | 43 | 47 | 40 | 39  | 33  | 47  | 46  | 62  | 60  |
| MR906 | 4  | 5  | 5  | 10  | 9   | 9   | 12  | 12  | 7   |
| MR907 | 18 | 21 | 9  | 36  | 40  | 31  | 33  | 46  | 45  |
| MR908 | 44 | 62 | 47 | 246 | 218 | 166 | 126 | 162 | 162 |
| MR909 | 11 | 19 | 8  | 7   | 15  | 14  | 19  | 24  | 29  |

|       |    |    |    |     |     |     |     |     |     |
|-------|----|----|----|-----|-----|-----|-----|-----|-----|
| MR91  | 28 | 30 | 20 | 41  | 27  | 29  | 39  | 54  | 43  |
| MR910 | 12 | 8  | 12 | 117 | 107 | 82  | 66  | 99  | 86  |
| MR911 | 17 | 11 | 16 | 49  | 47  | 42  | 34  | 39  | 43  |
| MR912 | 7  | 11 | 13 | 17  | 13  | 16  | 19  | 20  | 29  |
| MR913 | 40 | 24 | 26 | 198 | 152 | 129 | 87  | 145 | 107 |
| MR914 | 25 | 34 | 33 | 17  | 20  | 25  | 26  | 34  | 26  |
| MR915 | 18 | 26 | 21 | 182 | 151 | 110 | 54  | 108 | 89  |
| MR916 | 13 | 10 | 12 | 88  | 80  | 60  | 53  | 42  | 47  |
| MR917 | 72 | 67 | 54 | 60  | 58  | 60  | 48  | 71  | 70  |
| MR918 | 16 | 18 | 13 | 42  | 42  | 38  | 28  | 37  | 42  |
| MR919 | 2  | 6  | 5  | 8   | 4   | 3   | 6   | 8   | 6   |
| MR92  | 43 | 30 | 22 | 36  | 43  | 39  | 28  | 44  | 45  |
| MR920 | 26 | 21 | 22 | 13  | 15  | 17  | 20  | 32  | 32  |
| MR921 | 28 | 35 | 33 | 37  | 40  | 34  | 42  | 42  | 50  |
| MR922 | 11 | 21 | 14 | 32  | 21  | 16  | 30  | 45  | 43  |
| MR923 | 15 | 18 | 16 | 34  | 36  | 37  | 49  | 57  | 69  |
| MR924 | 20 | 14 | 20 | 72  | 63  | 53  | 37  | 50  | 41  |
| MR925 | 19 | 27 | 22 | 17  | 14  | 18  | 17  | 26  | 30  |
| MR926 | 34 | 37 | 24 | 468 | 376 | 325 | 339 | 440 | 392 |
| MR927 | 13 | 12 | 11 | 126 | 145 | 134 | 84  | 108 | 107 |
| MR928 | 14 | 16 | 17 | 10  | 15  | 14  | 27  | 38  | 26  |
| MR929 | 19 | 11 | 15 | 12  | 19  | 16  | 21  | 14  | 22  |
| MR93  | 22 | 28 | 19 | 19  | 15  | 26  | 41  | 44  | 43  |
| MR930 | 25 | 19 | 31 | 25  | 24  | 20  | 22  | 38  | 29  |
| MR931 | 12 | 11 | 17 | 10  | 11  | 13  | 19  | 18  | 15  |
| MR932 | 12 | 7  | 14 | 28  | 29  | 28  | 21  | 39  | 25  |
| MR933 | 12 | 14 | 19 | 18  | 18  | 18  | 11  | 13  | 17  |
| MR934 | 35 | 34 | 30 | 29  | 26  | 30  | 44  | 57  | 56  |
| MR935 | 1  | 3  | 1  | 3   | 4   | 1   | 4   | 7   | 6   |
| MR936 | 17 | 14 | 15 | 109 | 131 | 84  | 42  | 69  | 50  |
| MR937 | 8  | 10 | 8  | 10  | 15  | 8   | 22  | 37  | 31  |
| MR938 | 17 | 28 | 23 | 15  | 25  | 14  | 33  | 41  | 41  |
| MR939 | 15 | 14 | 16 | 49  | 50  | 29  | 38  | 35  | 44  |
| MR94  | 23 | 22 | 20 | 18  | 8   | 16  | 19  | 21  | 29  |
| MR940 | 8  | 15 | 12 | 18  | 17  | 10  | 27  | 36  | 28  |
| MR941 | 11 | 15 | 15 | 24  | 22  | 25  | 16  | 32  | 22  |
| MR942 | 18 | 22 | 24 | 49  | 51  | 57  | 45  | 43  | 48  |
| MR943 | 12 | 4  | 9  | 49  | 37  | 30  | 17  | 28  | 23  |
| MR944 | 14 | 11 | 10 | 26  | 28  | 21  | 16  | 19  | 28  |
| MR945 | 30 | 32 | 40 | 14  | 26  | 25  | 23  | 33  | 44  |
| MR946 | 38 | 31 | 31 | 26  | 22  | 24  | 32  | 44  | 34  |

|       |    |    |    |     |     |     |     |     |     |
|-------|----|----|----|-----|-----|-----|-----|-----|-----|
| MR947 | 20 | 17 | 13 | 9   | 11  | 7   | 16  | 19  | 17  |
| MR948 | 17 | 15 | 20 | 50  | 21  | 28  | 25  | 33  | 32  |
| MR949 | 26 | 25 | 18 | 37  | 32  | 31  | 40  | 46  | 38  |
| MR95  | 18 | 18 | 22 | 102 | 69  | 51  | 53  | 57  | 63  |
| MR950 | 25 | 27 | 24 | 56  | 59  | 54  | 50  | 80  | 78  |
| MR951 | 13 | 27 | 18 | 18  | 19  | 22  | 47  | 66  | 61  |
| MR952 | 10 | 7  | 5  | 127 | 110 | 95  | 71  | 91  | 67  |
| MR953 | 19 | 26 | 21 | 31  | 27  | 21  | 23  | 33  | 44  |
| MR954 | 36 | 31 | 37 | 33  | 24  | 27  | 55  | 48  | 66  |
| MR955 | 44 | 25 | 40 | 34  | 30  | 35  | 65  | 81  | 90  |
| MR956 | 40 | 39 | 29 | 50  | 50  | 40  | 41  | 48  | 51  |
| MR957 | 28 | 30 | 22 | 49  | 55  | 31  | 23  | 40  | 33  |
| MR958 | 8  | 10 | 4  | 100 | 76  | 46  | 17  | 50  | 27  |
| MR959 | 54 | 49 | 27 | 39  | 44  | 42  | 38  | 41  | 46  |
| MR96  | 7  | 8  | 8  | 26  | 14  | 15  | 15  | 18  | 22  |
| MR960 | 23 | 21 | 22 | 134 | 121 | 85  | 43  | 55  | 63  |
| MR961 | 27 | 25 | 26 | 38  | 34  | 35  | 23  | 29  | 51  |
| MR962 | 22 | 13 | 16 | 207 | 175 | 135 | 141 | 167 | 128 |
| MR963 | 31 | 43 | 49 | 51  | 52  | 40  | 51  | 85  | 73  |
| MR964 | 42 | 39 | 27 | 60  | 79  | 45  | 67  | 70  | 89  |
| MR965 | 57 | 77 | 62 | 37  | 39  | 54  | 71  | 79  | 88  |
| MR966 | 6  | 10 | 10 | 26  | 14  | 17  | 30  | 49  | 39  |
| MR967 | 34 | 21 | 22 | 24  | 27  | 15  | 23  | 41  | 35  |
| MR968 | 17 | 25 | 22 | 14  | 17  | 17  | 26  | 20  | 27  |
| MR969 | 12 | 17 | 12 | 16  | 15  | 7   | 19  | 33  | 43  |
| MR97  | 23 | 26 | 18 | 17  | 12  | 11  | 21  | 22  | 27  |
| MR970 | 8  | 14 | 18 | 21  | 18  | 14  | 16  | 32  | 31  |
| MR971 | 12 | 25 | 17 | 33  | 26  | 30  | 30  | 36  | 44  |
| MR972 | 31 | 26 | 20 | 81  | 82  | 47  | 62  | 84  | 73  |
| MR973 | 14 | 13 | 16 | 250 | 235 | 177 | 151 | 193 | 156 |
| MR974 | 25 | 16 | 26 | 24  | 27  | 22  | 20  | 29  | 46  |
| MR975 | 14 | 12 | 15 | 31  | 22  | 23  | 25  | 30  | 43  |
| MR976 | 14 | 10 | 7  | 4   | 5   | 6   | 7   | 12  | 12  |
| MR977 | 17 | 16 | 13 | 95  | 70  | 75  | 75  | 97  | 88  |
| MR978 | 33 | 32 | 34 | 35  | 42  | 33  | 35  | 41  | 51  |
| MR979 | 42 | 40 | 34 | 56  | 46  | 48  | 29  | 44  | 54  |
| MR98  | 24 | 14 | 13 | 39  | 37  | 23  | 23  | 37  | 33  |
| MR980 | 14 | 14 | 10 | 31  | 34  | 21  | 41  | 39  | 34  |
| MR981 | 21 | 18 | 19 | 16  | 17  | 14  | 34  | 28  | 25  |
| MR982 | 18 | 30 | 17 | 43  | 33  | 10  | 38  | 48  | 51  |
| MR983 | 35 | 46 | 29 | 12  | 17  | 18  | 26  | 40  | 31  |

|       |    |    |    |     |     |     |    |     |    |
|-------|----|----|----|-----|-----|-----|----|-----|----|
| MR984 | 7  | 11 | 6  | 10  | 18  | 10  | 17 | 15  | 20 |
| MR985 | 10 | 5  | 13 | 7   | 2   | 8   | 9  | 17  | 16 |
| MR986 | 21 | 20 | 12 | 30  | 11  | 24  | 32 | 38  | 34 |
| MR987 | 11 | 14 | 11 | 14  | 22  | 16  | 22 | 28  | 31 |
| MR988 | 18 | 10 | 13 | 27  | 23  | 20  | 26 | 39  | 27 |
| MR989 | 23 | 22 | 20 | 49  | 45  | 30  | 24 | 21  | 24 |
| MR99  | 41 | 48 | 38 | 16  | 22  | 20  | 47 | 65  | 69 |
| MR990 | 24 | 27 | 15 | 162 | 143 | 141 | 77 | 125 | 88 |
| MR991 | 10 | 11 | 8  | 44  | 35  | 19  | 18 | 35  | 15 |
| MR992 | 33 | 38 | 39 | 28  | 22  | 31  | 43 | 44  | 38 |
| MR993 | 45 | 40 | 42 | 26  | 24  | 32  | 39 | 51  | 42 |
| MR994 | 67 | 67 | 51 | 34  | 30  | 35  | 54 | 59  | 62 |
| MR995 | 51 | 42 | 48 | 20  | 36  | 23  | 41 | 57  | 65 |
| MR996 | 32 | 22 | 21 | 19  | 18  | 14  | 21 | 18  | 25 |
| MR997 | 21 | 26 | 17 | 38  | 25  | 36  | 33 | 34  | 47 |
| MR998 | 11 | 14 | 18 | 15  | 14  | 12  | 15 | 22  | 33 |
| MR999 | 12 | 15 | 13 | 13  | 10  | 16  | 20 | 20  | 16 |
| PC003 | 6  | 11 | 9  | 5   | 9   | 3   | 7  | 8   | 6  |
| PC004 | 1  | 4  | 3  | 5   | 6   | 6   | 10 | 15  | 20 |
| PC005 | 11 | 7  | 5  | 8   | 12  | 9   | 18 | 21  | 24 |
| PC007 | 7  | 8  | 4  | 15  | 11  | 12  | 18 | 18  | 30 |
| PC008 | 9  | 7  | 9  | 5   | 6   | 9   | 14 | 14  | 17 |
| PC009 | 9  | 9  | 10 | 7   | 4   | 4   | 9  | 13  | 15 |
| PC010 | 1  | 4  | 2  | 3   | 3   | 7   | 11 | 11  | 4  |
| PD001 | 4  | 0  | 2  | 8   | 6   | 7   | 9  | 8   | 12 |
| PD002 | 14 | 10 | 12 | 38  | 33  | 35  | 36 | 45  | 53 |
| PD003 | 11 | 9  | 11 | 22  | 19  | 12  | 23 | 27  | 23 |
| PD004 | 14 | 12 | 12 | 94  | 84  | 73  | 63 | 80  | 74 |
| PD005 | 12 | 20 | 12 | 13  | 11  | 13  | 20 | 26  | 27 |
| PD006 | 7  | 12 | 10 | 17  | 14  | 8   | 5  | 17  | 16 |
| PE001 | 14 | 8  | 11 | 18  | 24  | 14  | 21 | 31  | 28 |
| PE002 | 31 | 24 | 26 | 16  | 20  | 24  | 25 | 33  | 38 |
| PE003 | 11 | 15 | 10 | 79  | 71  | 58  | 53 | 62  | 59 |
| PE004 | 16 | 20 | 13 | 198 | 168 | 134 | 62 | 93  | 95 |
| PE006 | 8  | 9  | 4  | 6   | 12  | 12  | 19 | 9   | 15 |
| PE007 | 8  | 7  | 10 | 4   | 11  | 12  | 25 | 18  | 28 |
| PE008 | 6  | 6  | 3  | 9   | 7   | 3   | 2  | 3   | 0  |
| PF002 | 18 | 9  | 7  | 38  | 35  | 20  | 22 | 38  | 40 |
| PF003 | 11 | 15 | 19 | 45  | 45  | 42  | 30 | 38  | 42 |
| PF004 | 7  | 10 | 6  | 20  | 18  | 8   | 17 | 22  | 20 |
| PF005 | 29 | 21 | 19 | 39  | 42  | 42  | 26 | 45  | 30 |



|         |    |    |    |     |     |    |    |    |    |
|---------|----|----|----|-----|-----|----|----|----|----|
| PF006   | 19 | 12 | 16 | 101 | 101 | 74 | 58 | 73 | 68 |
| PF008   | 19 | 12 | 20 | 61  | 64  | 42 | 39 | 65 | 47 |
| PF009   | 15 | 19 | 7  | 20  | 18  | 9  | 23 | 22 | 30 |
| PK011   | 34 | 31 | 36 | 39  | 43  | 34 | 26 | 44 | 38 |
| PK022   | 8  | 12 | 8  | 2   | 3   | 10 | 8  | 10 | 15 |
| PK023   | 2  | 2  | 4  | 5   | 2   | 1  | 5  | 6  | 7  |
| PK025   | 23 | 28 | 19 | 28  | 22  | 17 | 26 | 41 | 43 |
| PT001   | 6  | 3  | 3  | 4   | 4   | 3  | 4  | 6  | 10 |
| PT002   | 6  | 9  | 9  | 8   | 6   | 11 | 7  | 7  | 9  |
| PT002m1 | 5  | 1  | 4  | 4   | 2   | 5  | 3  | 6  | 1  |
| PT002m2 | 12 | 10 | 17 | 30  | 30  | 22 | 21 | 27 | 27 |
| PT002m3 | 2  | 5  | 3  | 5   | 3   | 4  | 2  | 7  | 6  |
| PT002m4 | 10 | 7  | 20 | 20  | 11  | 27 | 18 | 21 | 24 |
| PT002m5 | 4  | 6  | 8  | 18  | 13  | 14 | 13 | 12 | 5  |
| PT002m6 | 17 | 11 | 7  | 9   | 19  | 18 | 17 | 17 | 18 |
| PT002m7 | 8  | 8  | 6  | 10  | 10  | 12 | 10 | 20 | 12 |
| PT002m8 | 6  | 9  | 11 | 7   | 8   | 12 | 11 | 15 | 15 |
| PT003   | 14 | 11 | 10 | 11  | 11  | 10 | 8  | 20 | 13 |
| PT004   | 8  | 12 | 4  | 7   | 9   | 13 | 12 | 9  | 13 |
| PT005   | 14 | 9  | 10 | 16  | 20  | 18 | 9  | 18 | 15 |
| PT006   | 7  | 14 | 3  | 4   | 5   | 3  | 3  | 2  | 4  |
| PT007   | 19 | 12 | 24 | 20  | 20  | 13 | 20 | 34 | 19 |
| PT008   | 5  | 6  | 2  | 12  | 10  | 11 | 10 | 18 | 20 |
| PT009   | 2  | 1  | 2  | 3   | 4   | 5  | 7  | 12 | 7  |
| PT010   | 16 | 20 | 17 | 21  | 35  | 23 | 20 | 22 | 29 |
| PT010m1 | 15 | 22 | 17 | 29  | 26  | 26 | 20 | 19 | 17 |
| PT010m2 | 25 | 20 | 19 | 43  | 21  | 35 | 22 | 28 | 20 |
| PW001   | 9  | 14 | 12 | 26  | 22  | 19 | 23 | 24 | 24 |
| PW002   | 6  | 10 | 7  | 9   | 16  | 16 | 28 | 55 | 38 |
| PW003   | 10 | 7  | 8  | 15  | 12  | 10 | 32 | 34 | 28 |
| PW004   | 7  | 3  | 4  | 9   | 6   | 14 | 11 | 17 | 26 |
| PW005   | 10 | 4  | 10 | 16  | 15  | 19 | 22 | 23 | 21 |
| S067    | 12 | 13 | 6  | 22  | 16  | 18 | 13 | 12 | 18 |
| S117    | 27 | 24 | 29 | 23  | 29  | 18 | 31 | 29 | 34 |
| S149    | 8  | 16 | 12 | 42  | 35  | 27 | 14 | 21 | 17 |
| SFF0001 | 13 | 17 | 22 | 72  | 64  | 57 | 54 | 58 | 64 |
| SFF0002 | 15 | 16 | 20 | 34  | 38  | 30 | 33 | 49 | 55 |
| SFF0003 | 14 | 8  | 7  | 15  | 9   | 12 | 4  | 15 | 16 |
| SFF0004 | 12 | 13 | 14 | 7   | 5   | 8  | 16 | 17 | 27 |
| SFF0005 | 4  | 4  | 1  | 10  | 15  | 14 | 8  | 9  | 14 |
| SFF0006 | 11 | 18 | 13 | 24  | 17  | 19 | 12 | 22 | 27 |

|         |    |    |    |     |     |     |     |     |     |
|---------|----|----|----|-----|-----|-----|-----|-----|-----|
| SFF0007 | 7  | 10 | 8  | 21  | 22  | 8   | 17  | 26  | 21  |
| SFF0008 | 18 | 19 | 19 | 24  | 17  | 40  | 22  | 33  | 33  |
| SFF0009 | 20 | 22 | 27 | 29  | 22  | 27  | 28  | 35  | 36  |
| SFF0010 | 21 | 17 | 21 | 32  | 30  | 28  | 29  | 40  | 35  |
| SFF0011 | 16 | 15 | 12 | 393 | 456 | 298 | 182 | 240 | 223 |
| SFF0012 | 4  | 16 | 9  | 9   | 6   | 8   | 13  | 21  | 14  |
| SFF0013 | 11 | 18 | 14 | 21  | 14  | 10  | 6   | 19  | 15  |
| SFF0014 | 13 | 26 | 30 | 26  | 21  | 30  | 20  | 34  | 37  |
| SFF0015 | 21 | 27 | 16 | 14  | 14  | 8   | 21  | 35  | 36  |
| SFF0016 | 25 | 18 | 26 | 44  | 44  | 22  | 34  | 52  | 55  |
| SFF0017 | 16 | 22 | 20 | 31  | 32  | 34  | 37  | 35  | 56  |
| SFF0018 | 13 | 18 | 14 | 17  | 16  | 17  | 21  | 26  | 31  |
| SFF0019 | 12 | 18 | 13 | 108 | 95  | 96  | 42  | 58  | 53  |
| SFF0020 | 6  | 10 | 5  | 9   | 4   | 9   | 6   | 5   | 11  |
| SFF0021 | 15 | 10 | 13 | 20  | 21  | 26  | 32  | 23  | 24  |
| SFF0022 | 7  | 8  | 5  | 19  | 13  | 10  | 12  | 21  | 28  |
| SFF0023 | 12 | 17 | 8  | 41  | 29  | 36  | 24  | 33  | 32  |
| SFF0024 | 12 | 15 | 14 | 22  | 10  | 19  | 18  | 26  | 30  |
| SFF0025 | 13 | 18 | 19 | 27  | 26  | 28  | 19  | 28  | 31  |
| SFF0026 | 13 | 26 | 14 | 12  | 12  | 13  | 32  | 31  | 32  |
| SFF0027 | 6  | 4  | 10 | 35  | 18  | 26  | 25  | 29  | 28  |
| SFF0028 | 12 | 8  | 16 | 41  | 37  | 36  | 20  | 16  | 23  |
| SFF0029 | 23 | 23 | 19 | 15  | 17  | 16  | 14  | 30  | 22  |
| SFF0030 | 51 | 43 | 31 | 47  | 42  | 39  | 54  | 43  | 56  |
| SFF0031 | 20 | 18 | 15 | 30  | 47  | 34  | 39  | 40  | 32  |
| SFF0032 | 16 | 19 | 18 | 19  | 19  | 22  | 25  | 26  | 19  |
| SFF0033 | 7  | 5  | 4  | 23  | 17  | 20  | 6   | 13  | 4   |
| SFF0034 | 17 | 12 | 17 | 17  | 20  | 21  | 25  | 17  | 29  |
| SFF0035 | 12 | 8  | 9  | 56  | 47  | 52  | 57  | 63  | 57  |
| SFF0036 | 2  | 2  | 2  | 4   | 1   | 0   | 1   | 5   | 1   |
| SFF0037 | 25 | 20 | 22 | 18  | 20  | 27  | 28  | 28  | 29  |
| SFF0038 | 16 | 16 | 13 | 32  | 20  | 15  | 25  | 30  | 30  |
| SFF0039 | 13 | 13 | 24 | 31  | 31  | 24  | 24  | 34  | 32  |
| SFF0040 | 24 | 24 | 24 | 20  | 23  | 13  | 22  | 34  | 28  |
| SFF0041 | 19 | 15 | 23 | 28  | 13  | 22  | 20  | 32  | 12  |
| SFF0042 | 23 | 22 | 22 | 72  | 86  | 59  | 40  | 52  | 44  |
| SFF0043 | 30 | 28 | 29 | 38  | 34  | 28  | 30  | 48  | 46  |
| SFF0044 | 9  | 7  | 7  | 3   | 6   | 11  | 14  | 15  | 17  |
| SFF0045 | 16 | 16 | 12 | 15  | 15  | 23  | 16  | 14  | 21  |
| SFF0046 | 23 | 14 | 11 | 15  | 15  | 9   | 15  | 29  | 14  |
| SFF0047 | 14 | 14 | 5  | 40  | 33  | 33  | 23  | 25  | 27  |

|         |    |    |    |     |     |     |     |     |     |
|---------|----|----|----|-----|-----|-----|-----|-----|-----|
| SFF0048 | 16 | 23 | 17 | 71  | 65  | 46  | 39  | 56  | 50  |
| SFF0049 | 6  | 9  | 8  | 26  | 11  | 20  | 14  | 24  | 28  |
| SFF0050 | 13 | 12 | 15 | 11  | 12  | 14  | 9   | 16  | 11  |
| SFF0052 | 17 | 22 | 15 | 18  | 26  | 26  | 17  | 22  | 15  |
| SFF0053 | 26 | 28 | 30 | 59  | 47  | 43  | 33  | 43  | 31  |
| SFF0054 | 4  | 1  | 3  | 7   | 7   | 3   | 5   | 6   | 7   |
| SFF0055 | 19 | 15 | 20 | 15  | 26  | 22  | 14  | 28  | 33  |
| SFF0056 | 46 | 36 | 48 | 53  | 47  | 45  | 42  | 40  | 46  |
| SFF0057 | 21 | 16 | 24 | 21  | 18  | 18  | 23  | 23  | 24  |
| SFF0058 | 22 | 45 | 28 | 54  | 39  | 32  | 42  | 48  | 59  |
| SFF0059 | 7  | 12 | 10 | 21  | 11  | 11  | 24  | 29  | 39  |
| SFF0060 | 13 | 15 | 8  | 15  | 16  | 15  | 11  | 20  | 23  |
| SFF0061 | 29 | 29 | 29 | 25  | 33  | 24  | 39  | 36  | 39  |
| SFF0062 | 8  | 10 | 11 | 10  | 8   | 14  | 20  | 18  | 26  |
| SFF0063 | 37 | 48 | 31 | 38  | 25  | 18  | 34  | 53  | 38  |
| SFF0064 | 24 | 20 | 20 | 30  | 14  | 20  | 39  | 47  | 46  |
| SFF0065 | 19 | 18 | 12 | 19  | 21  | 20  | 24  | 15  | 25  |
| SFF0066 | 24 | 11 | 14 | 30  | 27  | 26  | 20  | 28  | 29  |
| SFF0067 | 7  | 2  | 2  | 4   | 8   | 5   | 3   | 9   | 4   |
| SFF0068 | 33 | 22 | 21 | 87  | 71  | 42  | 52  | 74  | 60  |
| SFF0069 | 14 | 25 | 21 | 22  | 15  | 33  | 17  | 21  | 30  |
| SFF0070 | 6  | 4  | 3  | 46  | 33  | 25  | 22  | 33  | 40  |
| SFF0071 | 39 | 29 | 27 | 40  | 20  | 23  | 34  | 38  | 48  |
| SFF0072 | 33 | 24 | 29 | 95  | 101 | 93  | 110 | 116 | 127 |
| SFF0073 | 4  | 6  | 7  | 17  | 21  | 15  | 8   | 13  | 22  |
| SFF0074 | 13 | 31 | 15 | 28  | 28  | 26  | 15  | 22  | 19  |
| SFF0076 | 20 | 3  | 15 | 21  | 24  | 15  | 16  | 17  | 31  |
| SFF0077 | 17 | 21 | 12 | 17  | 28  | 23  | 21  | 30  | 18  |
| SFF0078 | 13 | 13 | 8  | 30  | 32  | 20  | 6   | 14  | 8   |
| SFF0079 | 6  | 11 | 7  | 15  | 16  | 16  | 13  | 12  | 18  |
| SFF0080 | 16 | 22 | 28 | 39  | 42  | 47  | 31  | 44  | 42  |
| SFF0081 | 10 | 8  | 7  | 35  | 25  | 25  | 18  | 22  | 19  |
| SFF0082 | 25 | 25 | 27 | 107 | 77  | 71  | 41  | 50  | 48  |
| SFF0083 | 26 | 19 | 18 | 34  | 33  | 23  | 18  | 33  | 39  |
| SFF0084 | 27 | 21 | 36 | 41  | 37  | 27  | 32  | 44  | 37  |
| SFF0085 | 20 | 23 | 17 | 64  | 58  | 43  | 36  | 49  | 44  |
| SFF0086 | 23 | 19 | 21 | 127 | 119 | 85  | 70  | 100 | 94  |
| SFF0087 | 37 | 45 | 48 | 59  | 54  | 41  | 30  | 75  | 65  |
| SFF0088 | 13 | 6  | 7  | 159 | 132 | 105 | 131 | 184 | 165 |
| SFF0089 | 27 | 26 | 29 | 58  | 40  | 51  | 35  | 39  | 50  |
| SFF0090 | 13 | 15 | 10 | 14  | 23  | 18  | 17  | 25  | 20  |

|         |    |    |    |     |     |     |     |     |     |
|---------|----|----|----|-----|-----|-----|-----|-----|-----|
| SFF0091 | 9  | 8  | 3  | 17  | 13  | 5   | 11  | 18  | 22  |
| SFF0092 | 10 | 13 | 10 | 20  | 30  | 27  | 35  | 21  | 23  |
| SFF0093 | 21 | 26 | 19 | 321 | 301 | 232 | 143 | 202 | 206 |
| SFF0094 | 14 | 15 | 15 | 17  | 15  | 15  | 16  | 29  | 13  |
| SFF0095 | 31 | 26 | 27 | 51  | 43  | 39  | 30  | 35  | 34  |
| SFF0096 | 19 | 15 | 16 | 17  | 16  | 19  | 42  | 39  | 48  |
| SFF0097 | 10 | 6  | 9  | 14  | 20  | 5   | 11  | 14  | 7   |
| SFF0098 | 62 | 50 | 70 | 82  | 89  | 76  | 50  | 74  | 64  |
| SFF0099 | 19 | 21 | 16 | 41  | 37  | 41  | 16  | 34  | 23  |
| SFF0100 | 6  | 8  | 4  | 10  | 7   | 5   | 2   | 10  | 9   |
| SFF0101 | 24 | 21 | 26 | 29  | 17  | 20  | 25  | 43  | 34  |
| SFF0102 | 24 | 16 | 25 | 16  | 12  | 19  | 12  | 22  | 23  |
| SFF0103 | 19 | 17 | 11 | 29  | 28  | 29  | 15  | 20  | 36  |
| SFF0104 | 2  | 8  | 3  | 7   | 7   | 4   | 10  | 12  | 3   |
| SFF0105 | 11 | 3  | 8  | 17  | 5   | 10  | 15  | 38  | 27  |
| SFF0106 | 16 | 13 | 15 | 18  | 21  | 19  | 36  | 39  | 28  |
| SFF0107 | 12 | 13 | 14 | 32  | 44  | 27  | 25  | 27  | 30  |
| SFF0108 | 38 | 46 | 37 | 104 | 104 | 81  | 74  | 120 | 113 |
| SFF0109 | 19 | 13 | 17 | 33  | 14  | 31  | 16  | 31  | 27  |
| SFF0110 | 37 | 24 | 19 | 118 | 93  | 77  | 71  | 84  | 74  |
| SFF0111 | 10 | 9  | 9  | 8   | 9   | 15  | 10  | 15  | 14  |
| SFF0112 | 27 | 30 | 20 | 80  | 78  | 57  | 49  | 62  | 52  |
| SFF0113 | 18 | 21 | 26 | 38  | 30  | 32  | 25  | 27  | 32  |
| SFF0114 | 13 | 20 | 16 | 10  | 18  | 12  | 18  | 29  | 31  |
| SFF0115 | 2  | 9  | 5  | 12  | 10  | 7   | 2   | 4   | 6   |
| SFF0116 | 31 | 25 | 26 | 68  | 72  | 42  | 65  | 81  | 96  |
| SFF0117 | 9  | 6  | 24 | 30  | 24  | 23  | 27  | 23  | 36  |
| SFF0118 | 5  | 19 | 15 | 20  | 15  | 16  | 13  | 16  | 30  |
| SFF0119 | 24 | 19 | 19 | 87  | 87  | 50  | 79  | 93  | 90  |
| SFF0123 | 23 | 14 | 19 | 49  | 25  | 32  | 34  | 38  | 44  |
| SFF0124 | 14 | 23 | 8  | 21  | 20  | 24  | 17  | 19  | 32  |
| SFF0125 | 23 | 17 | 16 | 29  | 29  | 27  | 31  | 27  | 40  |
| SFF0126 | 0  | 0  | 1  | 15  | 7   | 11  | 19  | 18  | 7   |
| SFF0127 | 29 | 22 | 23 | 128 | 124 | 105 | 71  | 100 | 98  |
| SFF0128 | 14 | 24 | 20 | 20  | 22  | 16  | 31  | 28  | 33  |
| SFF0129 | 13 | 12 | 19 | 49  | 29  | 27  | 18  | 23  | 40  |
| SFF0130 | 9  | 19 | 10 | 12  | 15  | 16  | 16  | 12  | 21  |
| SFF0131 | 15 | 17 | 17 | 22  | 24  | 15  | 17  | 29  | 36  |
| SFF0132 | 14 | 16 | 11 | 88  | 79  | 61  | 34  | 48  | 38  |
| SFF0133 | 7  | 13 | 7  | 7   | 12  | 10  | 9   | 11  | 7   |
| SFF0134 | 47 | 45 | 45 | 31  | 29  | 37  | 52  | 64  | 65  |

|         |    |    |    |     |     |     |    |     |    |
|---------|----|----|----|-----|-----|-----|----|-----|----|
| SFF0135 | 1  | 3  | 0  | 1   | 5   | 2   | 1  | 7   | 6  |
| SFF0136 | 34 | 41 | 28 | 37  | 29  | 30  | 30 | 42  | 53 |
| SFF0137 | 11 | 10 | 4  | 25  | 30  | 11  | 19 | 32  | 30 |
| SFF0138 | 16 | 12 | 18 | 11  | 10  | 15  | 9  | 16  | 17 |
| SFF0139 | 19 | 20 | 18 | 14  | 26  | 18  | 23 | 31  | 34 |
| SFF0140 | 8  | 9  | 13 | 17  | 13  | 19  | 14 | 23  | 33 |
| SFF0141 | 25 | 20 | 34 | 226 | 177 | 147 | 73 | 106 | 91 |
| SFF0142 | 21 | 24 | 14 | 25  | 25  | 26  | 18 | 28  | 23 |
| SFF0143 | 17 | 11 | 9  | 15  | 10  | 10  | 9  | 8   | 12 |
| SFF0144 | 7  | 19 | 19 | 19  | 33  | 20  | 17 | 23  | 41 |
| SFF0145 | 21 | 31 | 28 | 18  | 17  | 14  | 30 | 27  | 45 |
| SFF0146 | 12 | 19 | 16 | 59  | 61  | 39  | 33 | 56  | 55 |
| SFF0147 | 18 | 22 | 21 | 22  | 15  | 29  | 19 | 27  | 24 |
| SFF0148 | 14 | 18 | 20 | 37  | 28  | 38  | 22 | 25  | 22 |
| SFF0149 | 13 | 18 | 10 | 41  | 22  | 18  | 26 | 36  | 35 |
| SFF0150 | 25 | 32 | 30 | 120 | 91  | 87  | 46 | 71  | 54 |
| SFF0152 | 12 | 14 | 21 | 24  | 19  | 17  | 12 | 15  | 19 |
| SFF0153 | 29 | 28 | 17 | 101 | 88  | 64  | 46 | 80  | 76 |
| SFF0154 | 6  | 12 | 9  | 5   | 7   | 8   | 10 | 15  | 18 |
| SFF0155 | 17 | 22 | 21 | 37  | 31  | 29  | 31 | 28  | 33 |
| SFF0156 | 11 | 11 | 17 | 58  | 66  | 51  | 48 | 47  | 57 |
| SFF0158 | 15 | 8  | 12 | 11  | 10  | 10  | 20 | 10  | 21 |
| SFF0159 | 15 | 19 | 12 | 48  | 44  | 47  | 28 | 30  | 34 |
| SFF0160 | 21 | 14 | 15 | 26  | 16  | 12  | 12 | 24  | 23 |
| SFF0161 | 18 | 15 | 17 | 36  | 38  | 14  | 36 | 59  | 46 |
| SFF0162 | 18 | 32 | 23 | 43  | 44  | 34  | 35 | 38  | 42 |
| SFF0163 | 19 | 20 | 15 | 108 | 91  | 102 | 43 | 65  | 65 |
| SFF0164 | 12 | 14 | 15 | 39  | 51  | 48  | 21 | 26  | 32 |
| SFF0165 | 8  | 12 | 13 | 15  | 23  | 20  | 13 | 24  | 22 |
| SFF0166 | 18 | 25 | 21 | 27  | 28  | 21  | 30 | 30  | 28 |
| SFF0167 | 9  | 11 | 12 | 23  | 22  | 15  | 13 | 15  | 20 |
| SFF0168 | 18 | 24 | 18 | 37  | 49  | 34  | 15 | 27  | 23 |
| SFF0169 | 56 | 76 | 32 | 53  | 49  | 40  | 58 | 61  | 63 |
| SFF0170 | 34 | 31 | 38 | 54  | 63  | 61  | 52 | 74  | 65 |
| SFF0171 | 19 | 11 | 15 | 52  | 49  | 52  | 34 | 42  | 36 |
| SFF0172 | 21 | 28 | 16 | 80  | 64  | 52  | 45 | 63  | 51 |
| SFF0174 | 20 | 16 | 17 | 36  | 38  | 37  | 31 | 37  | 39 |
| SFF0175 | 22 | 34 | 26 | 64  | 51  | 33  | 50 | 71  | 58 |
| SFF0176 | 11 | 8  | 12 | 13  | 11  | 10  | 22 | 22  | 28 |
| SFF0177 | 75 | 54 | 76 | 24  | 32  | 43  | 58 | 75  | 77 |
| SFF0178 | 32 | 28 | 22 | 34  | 32  | 29  | 24 | 30  | 32 |

|         |    |    |    |     |     |     |    |     |     |
|---------|----|----|----|-----|-----|-----|----|-----|-----|
| SFF0179 | 28 | 28 | 34 | 37  | 34  | 37  | 27 | 32  | 34  |
| SFF0180 | 29 | 28 | 19 | 147 | 140 | 98  | 99 | 108 | 109 |
| SFF0181 | 19 | 15 | 10 | 16  | 19  | 18  | 15 | 25  | 19  |
| SFF0183 | 12 | 16 | 5  | 20  | 16  | 14  | 6  | 21  | 17  |
| SFF0184 | 13 | 12 | 13 | 128 | 112 | 89  | 62 | 69  | 80  |
| SFF0185 | 20 | 16 | 27 | 76  | 71  | 59  | 41 | 63  | 57  |
| SFF0186 | 27 | 23 | 30 | 20  | 32  | 28  | 45 | 65  | 58  |
| SFF0189 | 26 | 29 | 36 | 81  | 86  | 57  | 38 | 66  | 58  |
| SFF0190 | 18 | 27 | 23 | 32  | 30  | 34  | 33 | 44  | 38  |
| SFF0191 | 23 | 24 | 28 | 37  | 34  | 29  | 32 | 38  | 40  |
| SFF0193 | 34 | 28 | 28 | 38  | 35  | 26  | 55 | 52  | 59  |
| SFF0194 | 13 | 23 | 19 | 27  | 24  | 38  | 21 | 46  | 37  |
| SFF0195 | 3  | 3  | 6  | 18  | 31  | 32  | 5  | 5   | 11  |
| SFF0196 | 4  | 4  | 7  | 4   | 7   | 9   | 9  | 11  | 11  |
| SFF0197 | 16 | 15 | 16 | 162 | 148 | 144 | 90 | 128 | 134 |
| SFF0200 | 9  | 8  | 6  | 102 | 135 | 101 | 32 | 37  | 30  |
| SFF0201 | 22 | 20 | 21 | 23  | 23  | 10  | 20 | 48  | 26  |
| SFF0204 | 13 | 14 | 9  | 10  | 11  | 16  | 28 | 24  | 25  |
| SFF0205 | 17 | 20 | 14 | 33  | 34  | 19  | 17 | 13  | 27  |
| SFF0206 | 20 | 27 | 31 | 73  | 68  | 56  | 38 | 66  | 47  |
| SFF0207 | 24 | 31 | 37 | 82  | 78  | 76  | 42 | 46  | 43  |
| SFF0208 | 20 | 14 | 19 | 24  | 20  | 18  | 35 | 38  | 24  |
| SFF0209 | 14 | 16 | 14 | 20  | 22  | 14  | 12 | 12  | 34  |
| SFF0210 | 34 | 28 | 24 | 16  | 27  | 15  | 28 | 27  | 29  |
| SFF0211 | 24 | 27 | 18 | 32  | 17  | 23  | 31 | 38  | 31  |
| SFF0212 | 56 | 60 | 52 | 63  | 62  | 68  | 41 | 52  | 49  |
| SFF0213 | 29 | 37 | 29 | 22  | 23  | 28  | 17 | 16  | 16  |
| SFF0214 | 6  | 20 | 15 | 29  | 16  | 17  | 17 | 21  | 28  |
| SFF0215 | 19 | 18 | 23 | 30  | 18  | 20  | 28 | 34  | 38  |
| SFF0216 | 23 | 26 | 12 | 34  | 26  | 24  | 26 | 26  | 32  |
| SFF0217 | 7  | 13 | 10 | 39  | 39  | 36  | 15 | 40  | 30  |
| SFF0218 | 11 | 9  | 12 | 18  | 21  | 10  | 13 | 24  | 12  |
| SFF0221 | 13 | 8  | 9  | 11  | 7   | 9   | 9  | 13  | 16  |
| SFF0222 | 22 | 18 | 26 | 129 | 108 | 101 | 48 | 73  | 65  |
| SFF0223 | 6  | 5  | 2  | 18  | 21  | 14  | 11 | 21  | 18  |
| SFF0224 | 10 | 6  | 8  | 20  | 23  | 20  | 12 | 22  | 13  |
| SFF0225 | 11 | 19 | 18 | 32  | 26  | 22  | 22 | 31  | 29  |
| SFF0226 | 20 | 18 | 11 | 75  | 59  | 47  | 41 | 72  | 53  |
| SFF0227 | 27 | 24 | 17 | 33  | 30  | 28  | 32 | 34  | 53  |
| SFF0228 | 6  | 8  | 2  | 35  | 22  | 35  | 23 | 15  | 24  |
| SFF0229 | 11 | 11 | 9  | 13  | 10  | 15  | 12 | 20  | 17  |

|         |    |    |    |     |     |     |    |     |    |
|---------|----|----|----|-----|-----|-----|----|-----|----|
| SFF0230 | 23 | 13 | 16 | 104 | 90  | 62  | 76 | 112 | 83 |
| SFF0231 | 27 | 20 | 25 | 28  | 32  | 23  | 30 | 34  | 33 |
| SFF0232 | 25 | 12 | 15 | 25  | 23  | 23  | 31 | 34  | 45 |
| SFF0233 | 16 | 29 | 25 | 30  | 23  | 26  | 39 | 47  | 53 |
| SFF0234 | 20 | 17 | 19 | 50  | 68  | 58  | 26 | 28  | 29 |
| SFF0235 | 10 | 10 | 8  | 25  | 20  | 18  | 26 | 24  | 28 |
| SFF0240 | 46 | 33 | 30 | 39  | 30  | 24  | 41 | 46  | 37 |
| SFF0241 | 15 | 17 | 19 | 43  | 42  | 38  | 24 | 35  | 19 |
| SFF0242 | 28 | 18 | 30 | 14  | 18  | 13  | 19 | 38  | 31 |
| SFF0243 | 33 | 22 | 16 | 12  | 9   | 18  | 22 | 42  | 30 |
| SFF0244 | 21 | 19 | 28 | 17  | 21  | 24  | 27 | 46  | 45 |
| SFF0245 | 27 | 25 | 15 | 52  | 27  | 36  | 32 | 63  | 51 |
| SFF0246 | 27 | 33 | 19 | 72  | 56  | 52  | 47 | 57  | 58 |
| SFF0247 | 14 | 16 | 20 | 21  | 10  | 15  | 22 | 38  | 35 |
| SFF0248 | 5  | 3  | 5  | 42  | 48  | 37  | 10 | 24  | 18 |
| SFF0249 | 8  | 8  | 13 | 26  | 24  | 28  | 19 | 19  | 18 |
| SFF0250 | 20 | 21 | 11 | 20  | 13  | 18  | 21 | 20  | 30 |
| SFF0251 | 98 | 96 | 90 | 44  | 30  | 41  | 56 | 83  | 81 |
| SFF0253 | 9  | 13 | 13 | 21  | 10  | 14  | 17 | 24  | 31 |
| SFF0254 | 5  | 11 | 5  | 51  | 30  | 32  | 12 | 22  | 26 |
| SFF0255 | 19 | 22 | 14 | 98  | 91  | 73  | 64 | 65  | 79 |
| SFF0256 | 8  | 9  | 6  | 55  | 33  | 30  | 18 | 32  | 26 |
| SFF0257 | 12 | 18 | 14 | 15  | 14  | 21  | 20 | 25  | 22 |
| SFF0258 | 44 | 48 | 27 | 32  | 37  | 29  | 31 | 55  | 57 |
| SFF0260 | 15 | 28 | 16 | 29  | 26  | 24  | 27 | 16  | 31 |
| SFF0261 | 19 | 16 | 16 | 27  | 22  | 20  | 25 | 25  | 23 |
| SFF0262 | 12 | 17 | 20 | 19  | 23  | 22  | 25 | 28  | 34 |
| SFF0263 | 13 | 23 | 15 | 76  | 71  | 60  | 32 | 39  | 37 |
| SFF0264 | 33 | 30 | 37 | 47  | 32  | 41  | 29 | 35  | 53 |
| SFF0265 | 29 | 24 | 30 | 16  | 26  | 15  | 33 | 30  | 41 |
| SFF0266 | 30 | 30 | 33 | 62  | 47  | 38  | 44 | 68  | 48 |
| SFF0267 | 27 | 32 | 21 | 22  | 5   | 23  | 18 | 28  | 20 |
| SFF0268 | 14 | 16 | 14 | 27  | 32  | 19  | 14 | 21  | 33 |
| SFF0269 | 14 | 18 | 24 | 17  | 15  | 21  | 19 | 33  | 27 |
| SFF0270 | 46 | 61 | 41 | 30  | 16  | 38  | 42 | 58  | 49 |
| SFF0271 | 31 | 26 | 25 | 77  | 52  | 69  | 45 | 81  | 67 |
| SFF0272 | 16 | 17 | 13 | 9   | 12  | 7   | 15 | 16  | 23 |
| SFF0273 | 22 | 23 | 15 | 84  | 72  | 51  | 29 | 44  | 32 |
| SFF0274 | 24 | 25 | 25 | 132 | 121 | 103 | 49 | 84  | 72 |
| SFF0279 | 30 | 22 | 32 | 59  | 46  | 38  | 46 | 44  | 55 |
| SFF0280 | 17 | 15 | 20 | 32  | 25  | 28  | 17 | 24  | 38 |

|         |    |    |    |     |     |    |     |     |     |
|---------|----|----|----|-----|-----|----|-----|-----|-----|
| SFF0281 | 16 | 12 | 13 | 25  | 35  | 28 | 33  | 28  | 24  |
| SFF0282 | 34 | 43 | 28 | 24  | 27  | 34 | 25  | 36  | 41  |
| SFF0283 | 20 | 18 | 19 | 24  | 15  | 17 | 18  | 20  | 29  |
| SFF0284 | 13 | 16 | 7  | 18  | 15  | 10 | 32  | 31  | 19  |
| SFF0285 | 13 | 8  | 11 | 24  | 16  | 12 | 20  | 14  | 21  |
| SFF0286 | 8  | 7  | 8  | 6   | 8   | 9  | 11  | 7   | 15  |
| SFF0287 | 24 | 16 | 15 | 128 | 114 | 88 | 123 | 168 | 138 |
| SFF0288 | 21 | 29 | 21 | 71  | 59  | 64 | 30  | 34  | 44  |
| SFF0289 | 11 | 14 | 15 | 40  | 23  | 26 | 33  | 37  | 31  |
| SFF0290 | 20 | 29 | 31 | 37  | 40  | 22 | 43  | 30  | 32  |
| SFF0291 | 12 | 15 | 16 | 35  | 26  | 25 | 31  | 30  | 27  |
| SFF0294 | 21 | 22 | 22 | 47  | 36  | 34 | 29  | 44  | 49  |
| SFF0295 | 22 | 16 | 21 | 43  | 33  | 38 | 34  | 38  | 30  |
| SFF0296 | 14 | 14 | 12 | 11  | 9   | 11 | 8   | 15  | 12  |
| SFF0297 | 4  | 7  | 7  | 37  | 13  | 12 | 13  | 16  | 18  |
| SFF0298 | 13 | 23 | 20 | 25  | 15  | 21 | 23  | 22  | 34  |
| SFF0299 | 26 | 24 | 18 | 21  | 21  | 34 | 26  | 33  | 34  |
| SFF0300 | 9  | 9  | 13 | 25  | 15  | 25 | 17  | 26  | 26  |
| SFF0302 | 15 | 10 | 18 | 8   | 11  | 11 | 14  | 10  | 5   |
| SFF0303 | 24 | 25 | 22 | 36  | 22  | 33 | 25  | 34  | 24  |
| SFF0304 | 23 | 26 | 19 | 35  | 17  | 27 | 27  | 31  | 22  |
| SFF0305 | 11 | 18 | 12 | 44  | 42  | 36 | 30  | 28  | 35  |
| SFF0306 | 14 | 19 | 15 | 22  | 19  | 22 | 23  | 30  | 24  |
| SFF0307 | 19 | 18 | 19 | 50  | 63  | 59 | 26  | 21  | 22  |
| SFF0308 | 20 | 34 | 25 | 42  | 36  | 39 | 26  | 52  | 42  |
| SFF0309 | 14 | 12 | 13 | 18  | 25  | 23 | 19  | 15  | 24  |
| SFF0310 | 3  | 4  | 5  | 8   | 6   | 1  | 6   | 1   | 9   |
| SFF0311 | 18 | 20 | 11 | 26  | 22  | 33 | 12  | 25  | 16  |
| SFF0312 | 30 | 26 | 33 | 34  | 37  | 33 | 24  | 31  | 31  |
| SFF0313 | 25 | 22 | 22 | 32  | 29  | 31 | 26  | 33  | 35  |
| SFF0314 | 65 | 52 | 48 | 38  | 45  | 45 | 39  | 39  | 36  |
| SFF0315 | 20 | 23 | 19 | 68  | 46  | 36 | 41  | 55  | 50  |
| SFF0318 | 23 | 26 | 23 | 44  | 58  | 47 | 22  | 36  | 23  |
| SFF0319 | 5  | 13 | 11 | 15  | 9   | 11 | 13  | 12  | 15  |
| SFF0320 | 18 | 27 | 12 | 25  | 17  | 21 | 36  | 29  | 31  |
| SFF0321 | 13 | 23 | 20 | 28  | 37  | 23 | 18  | 14  | 21  |
| SFF0322 | 12 | 14 | 18 | 22  | 23  | 12 | 21  | 26  | 24  |
| SFF0323 | 6  | 6  | 7  | 2   | 5   | 7  | 4   | 5   | 9   |
| SFF0325 | 8  | 6  | 7  | 31  | 30  | 31 | 23  | 26  | 28  |
| SFF0326 | 8  | 13 | 8  | 15  | 13  | 15 | 10  | 10  | 15  |
| SFF0327 | 33 | 48 | 33 | 130 | 98  | 92 | 83  | 96  | 79  |



|         |    |    |    |     |     |     |     |     |     |
|---------|----|----|----|-----|-----|-----|-----|-----|-----|
| SFF0328 | 37 | 29 | 29 | 48  | 31  | 26  | 52  | 41  | 46  |
| SFF0329 | 25 | 31 | 26 | 34  | 32  | 25  | 28  | 36  | 36  |
| SFF0330 | 22 | 12 | 15 | 26  | 34  | 26  | 28  | 35  | 32  |
| SFF0331 | 27 | 29 | 18 | 30  | 31  | 23  | 43  | 43  | 58  |
| SFF0332 | 19 | 17 | 12 | 52  | 60  | 66  | 27  | 34  | 21  |
| SFF0333 | 26 | 28 | 20 | 41  | 30  | 24  | 28  | 33  | 34  |
| SFF0335 | 70 | 69 | 55 | 79  | 89  | 62  | 62  | 91  | 103 |
| SFF0336 | 25 | 22 | 18 | 38  | 36  | 43  | 24  | 55  | 33  |
| SFF0337 | 6  | 8  | 5  | 18  | 13  | 6   | 8   | 16  | 11  |
| SFF0338 | 10 | 12 | 22 | 21  | 12  | 12  | 15  | 24  | 19  |
| SFF0339 | 30 | 24 | 25 | 258 | 230 | 180 | 104 | 153 | 145 |
| SFF0341 | 38 | 36 | 37 | 25  | 24  | 26  | 27  | 39  | 37  |
| SFF0342 | 25 | 26 | 27 | 26  | 24  | 20  | 31  | 24  | 34  |
| SFF0343 | 19 | 20 | 16 | 78  | 69  | 64  | 34  | 51  | 54  |
| SFF0344 | 18 | 20 | 11 | 44  | 51  | 33  | 34  | 39  | 43  |
| SFF0345 | 31 | 24 | 33 | 72  | 66  | 65  | 49  | 73  | 58  |
| SFF0346 | 11 | 10 | 13 | 35  | 20  | 41  | 22  | 29  | 35  |
| SFF0349 | 9  | 8  | 10 | 8   | 15  | 10  | 13  | 14  | 22  |
| SFF0350 | 6  | 4  | 7  | 17  | 11  | 16  | 4   | 8   | 12  |
| SFF0351 | 27 | 23 | 20 | 49  | 44  | 38  | 41  | 63  | 41  |
| SFF0352 | 6  | 5  | 3  | 27  | 17  | 16  | 13  | 12  | 7   |
| SFF0353 | 7  | 13 | 12 | 29  | 35  | 32  | 22  | 29  | 32  |
| SFF0354 | 5  | 12 | 9  | 20  | 19  | 23  | 11  | 13  | 12  |
| SFF0355 | 13 | 18 | 14 | 54  | 40  | 42  | 26  | 40  | 29  |
| SFF0356 | 12 | 20 | 13 | 112 | 134 | 78  | 74  | 89  | 82  |
| SFF0357 | 25 | 16 | 25 | 31  | 37  | 30  | 21  | 30  | 26  |
| SFF0358 | 24 | 30 | 28 | 30  | 33  | 28  | 23  | 29  | 24  |
| SFF0359 | 25 | 24 | 20 | 50  | 64  | 48  | 70  | 103 | 114 |
| SFF0360 | 17 | 26 | 26 | 33  | 25  | 34  | 28  | 42  | 42  |
| SFF0361 | 16 | 15 | 16 | 32  | 31  | 26  | 16  | 18  | 20  |
| SFF0362 | 8  | 9  | 9  | 11  | 16  | 10  | 10  | 20  | 18  |
| SFF0363 | 8  | 11 | 10 | 43  | 22  | 31  | 24  | 34  | 30  |
| SFF0364 | 12 | 11 | 11 | 22  | 26  | 24  | 13  | 21  | 15  |
| SFF0365 | 9  | 17 | 12 | 47  | 49  | 27  | 22  | 32  | 35  |
| SFF0366 | 36 | 25 | 20 | 51  | 64  | 47  | 32  | 52  | 44  |
| SFF0367 | 21 | 10 | 15 | 44  | 23  | 40  | 25  | 32  | 27  |
| SFF0368 | 12 | 8  | 8  | 8   | 7   | 12  | 10  | 15  | 18  |
| SFF0369 | 39 | 34 | 35 | 31  | 34  | 36  | 28  | 44  | 46  |
| SFF0370 | 9  | 12 | 13 | 67  | 67  | 37  | 30  | 37  | 36  |
| SFF0372 | 21 | 20 | 19 | 44  | 23  | 20  | 32  | 40  | 44  |
| SFF0374 | 22 | 17 | 26 | 47  | 50  | 41  | 29  | 38  | 44  |

|         |    |    |    |     |     |     |     |     |     |
|---------|----|----|----|-----|-----|-----|-----|-----|-----|
| SFF0375 | 0  | 1  | 3  | 34  | 17  | 18  | 25  | 42  | 30  |
| SFF0376 | 12 | 7  | 11 | 23  | 14  | 20  | 28  | 30  | 25  |
| SFF0377 | 12 | 12 | 11 | 49  | 36  | 53  | 37  | 47  | 32  |
| SFF0378 | 28 | 35 | 31 | 33  | 29  | 35  | 33  | 47  | 35  |
| SFF0379 | 20 | 20 | 18 | 16  | 9   | 14  | 18  | 23  | 23  |
| SFF0380 | 30 | 17 | 22 | 23  | 18  | 23  | 23  | 37  | 29  |
| SFF0381 | 32 | 33 | 26 | 37  | 42  | 37  | 32  | 57  | 39  |
| SFF0382 | 7  | 4  | 9  | 20  | 17  | 20  | 16  | 14  | 14  |
| SFF0383 | 6  | 4  | 10 | 38  | 26  | 18  | 25  | 35  | 31  |
| SFF0384 | 22 | 26 | 21 | 47  | 60  | 42  | 42  | 36  | 55  |
| SFF0385 | 13 | 15 | 17 | 22  | 28  | 21  | 18  | 16  | 10  |
| SFF0386 | 4  | 2  | 2  | 4   | 3   | 7   | 4   | 4   | 7   |
| SFF0387 | 16 | 20 | 9  | 31  | 25  | 29  | 25  | 33  | 27  |
| SFF0389 | 9  | 5  | 11 | 65  | 54  | 56  | 24  | 41  | 34  |
| SFF0390 | 11 | 7  | 5  | 7   | 4   | 1   | 14  | 6   | 5   |
| SFF0391 | 7  | 12 | 9  | 10  | 6   | 8   | 10  | 14  | 22  |
| SFF0392 | 19 | 22 | 24 | 36  | 17  | 25  | 27  | 27  | 31  |
| SFF0393 | 47 | 69 | 53 | 66  | 72  | 73  | 61  | 89  | 64  |
| SFF0394 | 2  | 3  | 4  | 6   | 10  | 2   | 17  | 14  | 25  |
| SFF0395 | 29 | 32 | 22 | 19  | 30  | 32  | 36  | 39  | 34  |
| SFF0396 | 14 | 20 | 13 | 24  | 25  | 20  | 24  | 28  | 26  |
| SFF0397 | 26 | 25 | 25 | 83  | 70  | 64  | 49  | 66  | 59  |
| SFF0398 | 29 | 25 | 10 | 69  | 54  | 36  | 41  | 50  | 52  |
| SFF0399 | 26 | 20 | 15 | 20  | 18  | 16  | 12  | 19  | 21  |
| SFF0400 | 11 | 17 | 9  | 26  | 24  | 17  | 18  | 25  | 21  |
| SFF0401 | 14 | 7  | 10 | 22  | 18  | 13  | 28  | 28  | 30  |
| SFF0402 | 18 | 20 | 19 | 22  | 23  | 14  | 28  | 25  | 27  |
| SFF0403 | 14 | 11 | 11 | 12  | 11  | 10  | 18  | 18  | 7   |
| SFF0404 | 13 | 18 | 10 | 19  | 20  | 20  | 21  | 26  | 31  |
| SFF0405 | 11 | 18 | 11 | 25  | 21  | 18  | 27  | 41  | 52  |
| SFF0406 | 27 | 22 | 28 | 130 | 97  | 84  | 48  | 65  | 47  |
| SFF0408 | 21 | 21 | 16 | 30  | 27  | 25  | 21  | 30  | 24  |
| SFF0409 | 22 | 27 | 28 | 67  | 74  | 63  | 58  | 55  | 70  |
| SFF0410 | 23 | 20 | 27 | 80  | 55  | 55  | 32  | 63  | 54  |
| SFF0411 | 24 | 38 | 32 | 18  | 33  | 30  | 34  | 46  | 31  |
| SFF0412 | 11 | 7  | 5  | 22  | 21  | 17  | 23  | 32  | 26  |
| SFF0413 | 20 | 28 | 24 | 17  | 19  | 24  | 36  | 44  | 45  |
| SFF0416 | 12 | 17 | 9  | 16  | 12  | 11  | 15  | 25  | 24  |
| SFF0417 | 2  | 8  | 1  | 3   | 1   | 1   | 2   | 3   | 5   |
| SFF0420 | 7  | 9  | 8  | 465 | 452 | 420 | 267 | 363 | 313 |
| SFF0421 | 32 | 37 | 15 | 44  | 47  | 30  | 25  | 41  | 43  |

|         |    |    |    |     |     |     |     |     |     |
|---------|----|----|----|-----|-----|-----|-----|-----|-----|
| SFF0422 | 13 | 11 | 16 | 11  | 15  | 14  | 20  | 18  | 20  |
| SFF0423 | 14 | 12 | 12 | 16  | 11  | 7   | 19  | 20  | 28  |
| SFF0424 | 9  | 16 | 18 | 31  | 31  | 33  | 27  | 34  | 31  |
| SFF0425 | 18 | 15 | 10 | 27  | 15  | 19  | 12  | 26  | 31  |
| SFF0427 | 19 | 9  | 14 | 17  | 14  | 17  | 19  | 28  | 27  |
| SFF0429 | 38 | 43 | 36 | 96  | 91  | 70  | 63  | 65  | 54  |
| SFF0430 | 23 | 20 | 17 | 29  | 34  | 31  | 28  | 31  | 35  |
| SFF0431 | 8  | 4  | 10 | 43  | 22  | 35  | 19  | 37  | 28  |
| SFF0432 | 3  | 13 | 4  | 35  | 27  | 20  | 20  | 30  | 31  |
| SFF0433 | 17 | 25 | 9  | 41  | 49  | 39  | 36  | 47  | 31  |
| SFF0436 | 41 | 43 | 35 | 77  | 95  | 76  | 73  | 103 | 86  |
| SFF0437 | 15 | 14 | 9  | 31  | 24  | 21  | 24  | 28  | 22  |
| SFF0438 | 12 | 18 | 10 | 18  | 16  | 19  | 20  | 22  | 23  |
| SFF0439 | 34 | 27 | 39 | 29  | 20  | 32  | 19  | 28  | 26  |
| SFF0442 | 21 | 20 | 16 | 34  | 43  | 28  | 30  | 30  | 46  |
| SFF0443 | 11 | 14 | 6  | 144 | 100 | 94  | 60  | 82  | 63  |
| SFF0444 | 27 | 27 | 34 | 47  | 38  | 36  | 37  | 43  | 45  |
| SFF0445 | 21 | 21 | 16 | 33  | 48  | 29  | 34  | 37  | 40  |
| SFF0447 | 21 | 17 | 30 | 76  | 65  | 61  | 32  | 56  | 53  |
| SFF0448 | 23 | 22 | 18 | 31  | 29  | 17  | 20  | 25  | 19  |
| SFF0449 | 34 | 20 | 11 | 34  | 36  | 29  | 13  | 22  | 25  |
| SFF0450 | 18 | 22 | 20 | 38  | 37  | 44  | 35  | 70  | 49  |
| SFF0451 | 7  | 13 | 3  | 22  | 20  | 22  | 14  | 22  | 19  |
| SFF0452 | 12 | 15 | 23 | 70  | 56  | 57  | 35  | 56  | 52  |
| SFF0453 | 12 | 9  | 15 | 16  | 20  | 21  | 23  | 31  | 33  |
| SFF0454 | 10 | 10 | 6  | 20  | 11  | 14  | 8   | 12  | 14  |
| SFF0455 | 22 | 17 | 12 | 30  | 28  | 28  | 15  | 26  | 26  |
| SFF0456 | 14 | 8  | 15 | 21  | 19  | 7   | 13  | 29  | 30  |
| SFF0457 | 3  | 1  | 4  | 11  | 12  | 11  | 9   | 12  | 17  |
| SFF0458 | 12 | 11 | 13 | 53  | 47  | 44  | 27  | 40  | 34  |
| SFF0459 | 40 | 45 | 27 | 36  | 16  | 28  | 37  | 66  | 62  |
| SFF0462 | 41 | 44 | 36 | 35  | 38  | 29  | 39  | 46  | 60  |
| SFF0463 | 20 | 17 | 11 | 49  | 43  | 36  | 26  | 44  | 34  |
| SFF0464 | 21 | 18 | 23 | 28  | 39  | 31  | 23  | 25  | 22  |
| SFF0465 | 78 | 82 | 68 | 84  | 100 | 92  | 81  | 104 | 123 |
| SFF0466 | 16 | 21 | 20 | 26  | 29  | 26  | 23  | 30  | 38  |
| SFF0467 | 10 | 15 | 9  | 15  | 13  | 16  | 13  | 15  | 11  |
| SFF0468 | 3  | 5  | 1  | 11  | 10  | 7   | 9   | 9   | 7   |
| SFF0469 | 18 | 17 | 20 | 16  | 22  | 22  | 23  | 30  | 29  |
| SFF0472 | 8  | 22 | 19 | 23  | 24  | 23  | 31  | 26  | 29  |
| SFF0473 | 16 | 21 | 15 | 382 | 332 | 242 | 153 | 211 | 207 |

|         |    |    |    |     |     |     |     |     |     |
|---------|----|----|----|-----|-----|-----|-----|-----|-----|
| SFF0474 | 18 | 12 | 12 | 22  | 21  | 22  | 14  | 23  | 14  |
| SFF0475 | 19 | 17 | 17 | 18  | 17  | 18  | 28  | 29  | 27  |
| SFF0476 | 14 | 10 | 4  | 17  | 16  | 15  | 22  | 26  | 33  |
| SFF0477 | 23 | 29 | 17 | 41  | 36  | 32  | 28  | 36  | 32  |
| SFF0478 | 23 | 18 | 14 | 37  | 33  | 41  | 23  | 28  | 40  |
| SFF0479 | 11 | 9  | 10 | 65  | 53  | 48  | 29  | 29  | 34  |
| SFF0480 | 15 | 17 | 21 | 42  | 41  | 31  | 38  | 44  | 48  |
| SFF0481 | 26 | 33 | 32 | 32  | 33  | 29  | 43  | 60  | 54  |
| SFF0483 | 24 | 24 | 27 | 42  | 37  | 35  | 24  | 22  | 34  |
| SFF0484 | 14 | 14 | 19 | 16  | 24  | 19  | 9   | 18  | 25  |
| SFF0485 | 34 | 28 | 32 | 79  | 91  | 72  | 55  | 70  | 79  |
| SFF0486 | 7  | 15 | 17 | 17  | 29  | 18  | 13  | 20  | 29  |
| SFF0487 | 13 | 17 | 18 | 19  | 22  | 22  | 18  | 21  | 17  |
| SFF0488 | 9  | 9  | 9  | 9   | 7   | 12  | 12  | 10  | 5   |
| SFF0489 | 13 | 9  | 10 | 19  | 13  | 11  | 15  | 15  | 23  |
| SFF0490 | 40 | 23 | 33 | 76  | 76  | 65  | 48  | 50  | 49  |
| SFF0491 | 26 | 16 | 17 | 23  | 30  | 32  | 39  | 41  | 46  |
| SFF0492 | 6  | 14 | 15 | 15  | 12  | 11  | 16  | 16  | 12  |
| SFF0495 | 24 | 12 | 28 | 33  | 23  | 27  | 23  | 27  | 30  |
| SFF0496 | 18 | 22 | 25 | 36  | 30  | 39  | 33  | 44  | 31  |
| SFF0497 | 5  | 7  | 12 | 13  | 11  | 13  | 7   | 12  | 9   |
| SFF0499 | 28 | 31 | 21 | 15  | 27  | 25  | 20  | 40  | 19  |
| SFF0500 | 32 | 22 | 34 | 43  | 38  | 33  | 38  | 30  | 31  |
| SFF0501 | 4  | 3  | 6  | 6   | 9   | 5   | 8   | 17  | 11  |
| SFF0502 | 10 | 10 | 8  | 20  | 18  | 15  | 20  | 23  | 22  |
| SFF0503 | 21 | 36 | 18 | 56  | 47  | 42  | 30  | 40  | 47  |
| SFF0504 | 3  | 4  | 11 | 5   | 12  | 11  | 8   | 16  | 18  |
| SFF0505 | 28 | 29 | 31 | 405 | 418 | 281 | 200 | 235 | 218 |
| SFF0506 | 13 | 6  | 14 | 22  | 25  | 18  | 10  | 14  | 17  |
| SFF0507 | 26 | 32 | 21 | 40  | 40  | 27  | 30  | 37  | 23  |
| SFF0508 | 11 | 12 | 15 | 291 | 256 | 242 | 168 | 218 | 214 |
| SFF0509 | 28 | 23 | 27 | 21  | 16  | 19  | 18  | 23  | 32  |
| SFF0510 | 18 | 21 | 15 | 21  | 20  | 12  | 22  | 21  | 38  |
| SFF0511 | 59 | 58 | 50 | 31  | 25  | 23  | 37  | 57  | 44  |
| SFF0514 | 9  | 6  | 13 | 11  | 11  | 9   | 9   | 16  | 10  |
| SFF0515 | 8  | 7  | 10 | 11  | 13  | 11  | 16  | 22  | 18  |
| SFF0516 | 18 | 17 | 22 | 111 | 79  | 60  | 46  | 50  | 55  |
| SFF0517 | 11 | 16 | 7  | 19  | 19  | 13  | 24  | 16  | 18  |
| SFF0518 | 24 | 19 | 24 | 50  | 44  | 33  | 28  | 34  | 39  |
| SFF0519 | 18 | 23 | 13 | 17  | 16  | 22  | 34  | 32  | 32  |
| SFF0520 | 20 | 18 | 17 | 72  | 86  | 66  | 44  | 46  | 39  |

|         |    |    |    |     |     |     |     |     |     |
|---------|----|----|----|-----|-----|-----|-----|-----|-----|
| SFF0521 | 14 | 12 | 12 | 65  | 59  | 48  | 42  | 57  | 48  |
| SFF0524 | 21 | 33 | 26 | 22  | 17  | 18  | 24  | 22  | 31  |
| SFF0525 | 89 | 86 | 92 | 83  | 64  | 70  | 62  | 61  | 70  |
| SFF0526 | 12 | 9  | 11 | 9   | 16  | 6   | 12  | 18  | 13  |
| SFF0527 | 33 | 25 | 31 | 25  | 22  | 22  | 44  | 61  | 68  |
| SFF0528 | 14 | 9  | 7  | 74  | 63  | 55  | 40  | 50  | 47  |
| SFF0529 | 12 | 14 | 8  | 22  | 11  | 7   | 11  | 17  | 18  |
| SFF0530 | 15 | 12 | 14 | 18  | 21  | 16  | 19  | 13  | 14  |
| SFF0531 | 17 | 14 | 18 | 13  | 7   | 11  | 15  | 17  | 19  |
| SFF0532 | 12 | 17 | 16 | 52  | 36  | 38  | 31  | 21  | 33  |
| SFF0533 | 27 | 29 | 26 | 40  | 41  | 35  | 32  | 42  | 42  |
| SFF0534 | 14 | 19 | 19 | 51  | 49  | 44  | 37  | 47  | 52  |
| SFF0535 | 24 | 28 | 23 | 227 | 189 | 139 | 67  | 111 | 104 |
| SFF0536 | 18 | 20 | 21 | 55  | 36  | 32  | 37  | 53  | 41  |
| SFF0537 | 16 | 11 | 17 | 50  | 53  | 51  | 33  | 35  | 38  |
| SFF0538 | 4  | 3  | 9  | 8   | 10  | 11  | 14  | 21  | 17  |
| SFF0539 | 16 | 9  | 21 | 11  | 15  | 6   | 15  | 23  | 23  |
| SFF0540 | 21 | 23 | 28 | 54  | 65  | 57  | 55  | 62  | 76  |
| SFF0541 | 3  | 3  | 4  | 7   | 2   | 6   | 11  | 17  | 13  |
| SFF0542 | 21 | 37 | 32 | 29  | 32  | 42  | 32  | 50  | 48  |
| SFF0543 | 19 | 21 | 20 | 122 | 122 | 96  | 76  | 94  | 84  |
| SFF0544 | 21 | 21 | 23 | 61  | 55  | 30  | 23  | 44  | 48  |
| SFF0545 | 13 | 13 | 19 | 22  | 28  | 30  | 26  | 44  | 43  |
| SFF0546 | 21 | 33 | 25 | 537 | 466 | 345 | 263 | 332 | 330 |
| SFF0547 | 31 | 27 | 25 | 20  | 19  | 12  | 26  | 33  | 31  |
| SFF0553 | 1  | 0  | 3  | 3   | 3   | 2   | 4   | 4   | 7   |
| SFF0554 | 19 | 11 | 13 | 37  | 42  | 37  | 40  | 52  | 46  |
| SFF0555 | 24 | 31 | 33 | 147 | 138 | 72  | 71  | 97  | 72  |
| SFF0556 | 7  | 11 | 9  | 5   | 4   | 10  | 11  | 22  | 18  |
| SFF0557 | 19 | 11 | 12 | 25  | 29  | 23  | 10  | 21  | 10  |
| SFF0558 | 19 | 10 | 14 | 42  | 47  | 30  | 16  | 23  | 18  |
| SFF0559 | 2  | 2  | 5  | 12  | 6   | 11  | 16  | 19  | 19  |
| SFF0560 | 4  | 6  | 4  | 4   | 4   | 5   | 5   | 19  | 14  |
| SFF0561 | 23 | 24 | 25 | 33  | 44  | 25  | 30  | 35  | 29  |
| SFF0562 | 4  | 3  | 7  | 17  | 12  | 13  | 7   | 14  | 12  |
| SFF0563 | 24 | 20 | 29 | 41  | 51  | 47  | 46  | 57  | 66  |
| SFF0564 | 26 | 27 | 25 | 228 | 187 | 173 | 81  | 133 | 119 |
| SFF0565 | 24 | 30 | 18 | 97  | 76  | 65  | 34  | 48  | 66  |
| SFF0566 | 17 | 10 | 13 | 58  | 54  | 33  | 35  | 50  | 57  |
| SFF0568 | 10 | 11 | 11 | 18  | 15  | 10  | 12  | 20  | 16  |
| SFF0569 | 25 | 28 | 15 | 23  | 20  | 25  | 22  | 27  | 30  |

|         |    |    |    |     |     |     |     |     |     |
|---------|----|----|----|-----|-----|-----|-----|-----|-----|
| SFF0570 | 13 | 16 | 10 | 12  | 10  | 15  | 18  | 16  | 26  |
| SFF0571 | 8  | 6  | 14 | 12  | 12  | 8   | 10  | 12  | 7   |
| SFF0572 | 33 | 27 | 29 | 42  | 34  | 36  | 24  | 35  | 35  |
| SFF0574 | 16 | 18 | 19 | 400 | 386 | 271 | 139 | 183 | 162 |
| SFF0575 | 9  | 12 | 13 | 19  | 12  | 20  | 18  | 10  | 17  |
| SFF0576 | 54 | 39 | 38 | 28  | 24  | 40  | 53  | 45  | 37  |
| SFF0578 | 13 | 17 | 17 | 282 | 261 | 165 | 109 | 158 | 153 |
| SFF0579 | 36 | 32 | 31 | 63  | 60  | 53  | 36  | 63  | 58  |
| SFF0580 | 8  | 8  | 13 | 20  | 13  | 14  | 17  | 15  | 16  |
| SFF0581 | 38 | 40 | 20 | 35  | 25  | 27  | 41  | 39  | 42  |
| SFF0582 | 30 | 23 | 27 | 56  | 53  | 37  | 38  | 65  | 40  |
| SFF0583 | 14 | 18 | 17 | 27  | 31  | 21  | 18  | 26  | 33  |
| SFF0584 | 21 | 19 | 21 | 20  | 24  | 24  | 16  | 29  | 30  |
| SFF0585 | 24 | 30 | 17 | 27  | 17  | 22  | 29  | 36  | 36  |
| SFF0586 | 10 | 9  | 7  | 12  | 5   | 7   | 6   | 5   | 10  |
| SFF0587 | 19 | 12 | 14 | 19  | 23  | 22  | 23  | 35  | 30  |
| SFF0588 | 24 | 24 | 24 | 29  | 28  | 22  | 13  | 24  | 28  |
| SFF0591 | 25 | 19 | 14 | 77  | 63  | 59  | 44  | 38  | 54  |
| SFF0592 | 45 | 34 | 33 | 72  | 75  | 46  | 43  | 56  | 61  |
| SFF0593 | 20 | 16 | 19 | 28  | 18  | 26  | 17  | 28  | 25  |
| SFF0594 | 37 | 34 | 26 | 31  | 42  | 35  | 36  | 59  | 47  |
| SFF0595 | 14 | 18 | 16 | 31  | 24  | 25  | 30  | 32  | 32  |
| SFF0596 | 7  | 9  | 6  | 11  | 13  | 15  | 14  | 22  | 20  |
| SFF0597 | 11 | 15 | 17 | 15  | 10  | 9   | 19  | 34  | 35  |
| SFF0598 | 18 | 11 | 13 | 10  | 14  | 7   | 18  | 14  | 23  |
| SFF0599 | 30 | 28 | 23 | 40  | 35  | 34  | 51  | 47  | 54  |
| SFF0600 | 23 | 14 | 18 | 46  | 64  | 51  | 31  | 46  | 39  |
| SFF0601 | 21 | 11 | 15 | 23  | 28  | 16  | 16  | 17  | 23  |
| SFF0606 | 4  | 6  | 5  | 11  | 8   | 6   | 19  | 7   | 17  |
| SFF0611 | 16 | 18 | 19 | 15  | 24  | 16  | 32  | 27  | 34  |
| SFF0612 | 13 | 13 | 18 | 19  | 19  | 22  | 17  | 30  | 22  |
| SFF0613 | 25 | 27 | 33 | 34  | 24  | 21  | 32  | 33  | 29  |
| SFF0614 | 27 | 17 | 8  | 32  | 24  | 41  | 20  | 25  | 29  |
| SFF0616 | 14 | 10 | 19 | 28  | 32  | 28  | 16  | 30  | 32  |
| SFF0617 | 19 | 16 | 17 | 19  | 21  | 19  | 15  | 17  | 17  |
| SFF0618 | 17 | 6  | 11 | 20  | 13  | 16  | 21  | 25  | 22  |
| SFF0619 | 22 | 30 | 20 | 30  | 23  | 18  | 27  | 31  | 39  |
| SFF0620 | 28 | 29 | 25 | 60  | 51  | 37  | 36  | 49  | 41  |
| SFF0621 | 55 | 42 | 39 | 50  | 36  | 47  | 32  | 47  | 43  |
| SFF0622 | 20 | 17 | 13 | 61  | 57  | 34  | 30  | 57  | 43  |
| SFF0624 | 35 | 48 | 48 | 27  | 30  | 29  | 47  | 64  | 52  |

|         |    |    |    |     |     |     |     |     |     |
|---------|----|----|----|-----|-----|-----|-----|-----|-----|
| SFF0625 | 11 | 12 | 13 | 33  | 31  | 26  | 15  | 24  | 25  |
| SFF0626 | 17 | 27 | 22 | 47  | 32  | 29  | 18  | 31  | 37  |
| SFF0628 | 27 | 29 | 19 | 49  | 51  | 43  | 31  | 40  | 49  |
| SFF0629 | 22 | 18 | 23 | 19  | 25  | 25  | 19  | 27  | 30  |
| SFF0631 | 10 | 8  | 12 | 8   | 8   | 7   | 7   | 14  | 17  |
| SFF0632 | 28 | 25 | 23 | 38  | 30  | 31  | 31  | 41  | 41  |
| SFF0633 | 24 | 23 | 14 | 19  | 20  | 17  | 21  | 40  | 29  |
| SFF0634 | 15 | 17 | 17 | 21  | 16  | 18  | 19  | 22  | 20  |
| SFF0635 | 12 | 13 | 9  | 32  | 35  | 24  | 31  | 47  | 29  |
| SFF0637 | 8  | 10 | 12 | 15  | 7   | 14  | 11  | 11  | 19  |
| SFF0638 | 14 | 23 | 10 | 29  | 26  | 27  | 26  | 38  | 27  |
| SFF0639 | 9  | 7  | 5  | 11  | 12  | 13  | 14  | 17  | 13  |
| SFF0640 | 11 | 13 | 11 | 16  | 12  | 18  | 19  | 27  | 30  |
| SFF0641 | 15 | 18 | 14 | 59  | 60  | 56  | 31  | 36  | 37  |
| SFF0644 | 13 | 17 | 8  | 61  | 51  | 42  | 48  | 53  | 59  |
| SFF0645 | 6  | 8  | 1  | 11  | 11  | 10  | 7   | 19  | 14  |
| SFF0646 | 15 | 15 | 5  | 25  | 27  | 15  | 27  | 42  | 37  |
| SFF0647 | 22 | 20 | 14 | 38  | 34  | 28  | 28  | 25  | 33  |
| SFF0649 | 17 | 8  | 16 | 408 | 345 | 306 | 228 | 339 | 292 |
| SFF0650 | 13 | 26 | 23 | 73  | 63  | 49  | 52  | 48  | 51  |
| SFF0653 | 15 | 10 | 12 | 27  | 29  | 26  | 17  | 25  | 43  |
| SFF0654 | 19 | 18 | 12 | 24  | 21  | 19  | 17  | 24  | 15  |
| SFF0655 | 15 | 20 | 23 | 13  | 16  | 16  | 19  | 31  | 26  |
| SFF0656 | 38 | 31 | 22 | 88  | 79  | 70  | 52  | 62  | 56  |
| SFF0657 | 7  | 8  | 5  | 17  | 11  | 10  | 5   | 13  | 12  |
| SFF0659 | 19 | 14 | 12 | 27  | 13  | 16  | 20  | 19  | 19  |
| SFF0661 | 24 | 30 | 20 | 44  | 40  | 33  | 31  | 28  | 34  |
| SFF0662 | 11 | 11 | 7  | 61  | 42  | 30  | 23  | 32  | 27  |
| SFF0663 | 29 | 38 | 37 | 70  | 65  | 43  | 29  | 48  | 47  |
| SFF0664 | 13 | 22 | 25 | 17  | 18  | 20  | 16  | 17  | 21  |
| SFF0665 | 10 | 14 | 12 | 40  | 47  | 26  | 34  | 44  | 55  |
| SFF0670 | 17 | 30 | 16 | 31  | 25  | 31  | 38  | 24  | 37  |
| SFF0671 | 12 | 9  | 14 | 11  | 19  | 15  | 11  | 21  | 16  |
| SFF0672 | 24 | 25 | 19 | 11  | 25  | 23  | 20  | 27  | 30  |
| SFF0673 | 20 | 28 | 17 | 68  | 62  | 49  | 39  | 60  | 38  |
| SFF0674 | 44 | 34 | 27 | 20  | 22  | 23  | 21  | 24  | 17  |
| SFF0675 | 8  | 13 | 11 | 6   | 5   | 6   | 11  | 10  | 12  |
| SFF0676 | 43 | 34 | 30 | 161 | 144 | 100 | 99  | 110 | 96  |
| SFF0677 | 17 | 18 | 16 | 58  | 48  | 35  | 27  | 35  | 34  |
| SFF0678 | 33 | 30 | 29 | 66  | 87  | 52  | 35  | 63  | 63  |
| SFF0679 | 14 | 11 | 4  | 27  | 27  | 20  | 24  | 35  | 28  |

|         |    |    |    |     |     |     |     |     |     |
|---------|----|----|----|-----|-----|-----|-----|-----|-----|
| SFF0680 | 14 | 12 | 11 | 18  | 14  | 14  | 14  | 17  | 12  |
| SFF0681 | 23 | 24 | 28 | 105 | 124 | 83  | 59  | 68  | 76  |
| SFF0682 | 30 | 41 | 30 | 98  | 86  | 80  | 56  | 50  | 45  |
| SFF0683 | 8  | 8  | 7  | 30  | 12  | 14  | 18  | 26  | 23  |
| SFF0684 | 4  | 8  | 6  | 26  | 16  | 19  | 27  | 36  | 30  |
| SFF0685 | 27 | 18 | 17 | 49  | 35  | 29  | 57  | 72  | 57  |
| SFF0686 | 17 | 26 | 26 | 53  | 49  | 43  | 50  | 35  | 43  |
| SFF0687 | 22 | 12 | 10 | 13  | 15  | 12  | 30  | 30  | 40  |
| SFF0688 | 20 | 25 | 25 | 41  | 35  | 29  | 25  | 51  | 53  |
| SFF0689 | 29 | 11 | 19 | 43  | 35  | 21  | 29  | 30  | 38  |
| SFF0691 | 25 | 28 | 30 | 31  | 35  | 17  | 34  | 46  | 49  |
| SFF0693 | 16 | 17 | 16 | 62  | 36  | 33  | 20  | 23  | 21  |
| SFF0694 | 13 | 26 | 15 | 38  | 27  | 36  | 22  | 21  | 29  |
| SFF0695 | 6  | 16 | 9  | 254 | 216 | 205 | 150 | 231 | 161 |
| SFF0696 | 32 | 33 | 28 | 34  | 29  | 30  | 33  | 44  | 48  |
| SFF0697 | 14 | 17 | 11 | 43  | 40  | 36  | 19  | 29  | 32  |
| SFF0698 | 12 | 17 | 13 | 154 | 139 | 95  | 122 | 164 | 158 |
| SFF0699 | 5  | 9  | 4  | 14  | 8   | 10  | 13  | 19  | 18  |
| SFF0700 | 59 | 36 | 48 | 32  | 50  | 40  | 43  | 43  | 62  |
| SFF0701 | 25 | 31 | 15 | 48  | 39  | 28  | 35  | 45  | 42  |
| SFF0702 | 4  | 4  | 4  | 47  | 34  | 27  | 33  | 34  | 24  |
| SFF0703 | 3  | 1  | 2  | 43  | 37  | 29  | 35  | 36  | 41  |
| SFF0704 | 32 | 31 | 37 | 38  | 37  | 43  | 39  | 48  | 46  |
| SFF0705 | 14 | 16 | 10 | 18  | 22  | 18  | 11  | 29  | 24  |
| SFF0706 | 10 | 14 | 14 | 16  | 14  | 17  | 21  | 18  | 22  |
| SFF0709 | 9  | 11 | 6  | 25  | 14  | 9   | 16  | 19  | 12  |
| SFF0710 | 7  | 11 | 5  | 88  | 80  | 70  | 41  | 50  | 34  |
| SFF0711 | 12 | 30 | 16 | 35  | 33  | 44  | 31  | 24  | 32  |
| SFF0714 | 21 | 26 | 17 | 24  | 22  | 28  | 22  | 33  | 16  |
| SFF0716 | 18 | 29 | 32 | 81  | 83  | 64  | 41  | 46  | 46  |
| SFF0717 | 14 | 8  | 4  | 4   | 7   | 5   | 10  | 9   | 9   |
| SFF0718 | 12 | 11 | 8  | 25  | 15  | 15  | 17  | 15  | 15  |
| SFF0719 | 26 | 27 | 20 | 22  | 21  | 23  | 22  | 28  | 24  |
| SFF0720 | 29 | 24 | 30 | 114 | 114 | 94  | 55  | 84  | 71  |
| SFF0721 | 40 | 45 | 49 | 40  | 28  | 30  | 26  | 62  | 47  |
| SFF0722 | 32 | 29 | 30 | 32  | 28  | 25  | 21  | 36  | 34  |
| SFF0723 | 11 | 7  | 19 | 16  | 15  | 13  | 14  | 27  | 34  |
| SFF0724 | 13 | 11 | 7  | 8   | 12  | 21  | 15  | 8   | 15  |
| SFF0726 | 9  | 4  | 8  | 47  | 49  | 34  | 20  | 20  | 26  |
| SFF0727 | 19 | 12 | 17 | 18  | 13  | 18  | 19  | 23  | 23  |
| SFF0728 | 19 | 23 | 24 | 17  | 14  | 20  | 21  | 25  | 35  |



|         |    |    |    |     |     |     |    |    |     |
|---------|----|----|----|-----|-----|-----|----|----|-----|
| SFF0729 | 20 | 13 | 10 | 16  | 21  | 20  | 23 | 22 | 23  |
| SFF0730 | 10 | 8  | 11 | 22  | 20  | 19  | 26 | 43 | 37  |
| SFF0731 | 12 | 14 | 9  | 172 | 175 | 145 | 67 | 74 | 78  |
| SFF0732 | 14 | 13 | 20 | 22  | 19  | 16  | 28 | 25 | 26  |
| SFF0733 | 0  | 4  | 5  | 17  | 9   | 9   | 17 | 17 | 10  |
| SFF0734 | 18 | 16 | 11 | 78  | 57  | 57  | 58 | 80 | 102 |
| SFF0736 | 19 | 14 | 14 | 27  | 34  | 32  | 26 | 31 | 35  |
| SFF0737 | 21 | 17 | 12 | 26  | 34  | 36  | 21 | 48 | 34  |
| SFF0738 | 23 | 23 | 15 | 23  | 25  | 24  | 22 | 36 | 25  |
| SFF0739 | 10 | 13 | 13 | 9   | 16  | 16  | 21 | 28 | 18  |
| SFF0741 | 6  | 3  | 3  | 36  | 37  | 23  | 21 | 25 | 23  |
| SFF0744 | 4  | 6  | 7  | 16  | 14  | 21  | 16 | 17 | 22  |
| SFF0745 | 8  | 13 | 12 | 14  | 15  | 14  | 6  | 25 | 16  |
| SFF0746 | 40 | 31 | 19 | 30  | 24  | 25  | 37 | 52 | 28  |
| SFF0747 | 9  | 3  | 7  | 20  | 26  | 23  | 20 | 32 | 13  |
| SFF0748 | 5  | 9  | 4  | 11  | 5   | 5   | 11 | 14 | 14  |
| SFF0749 | 9  | 13 | 12 | 16  | 14  | 18  | 10 | 9  | 16  |
| SFF0750 | 6  | 10 | 9  | 35  | 26  | 31  | 14 | 19 | 13  |
| SFF0751 | 21 | 22 | 11 | 25  | 25  | 16  | 15 | 19 | 20  |
| SFF0753 | 13 | 11 | 13 | 71  | 49  | 43  | 37 | 36 | 38  |
| SFF0754 | 21 | 32 | 15 | 39  | 35  | 33  | 29 | 36 | 35  |
| SFF0755 | 25 | 30 | 36 | 25  | 25  | 22  | 31 | 36 | 28  |
| SFF0757 | 10 | 4  | 10 | 26  | 24  | 25  | 29 | 32 | 43  |
| SFF0760 | 21 | 26 | 13 | 28  | 28  | 18  | 27 | 26 | 29  |
| SFF0761 | 14 | 20 | 14 | 50  | 39  | 26  | 25 | 34 | 37  |
| SFF0762 | 5  | 5  | 9  | 5   | 5   | 10  | 4  | 7  | 4   |
| SFF0763 | 24 | 36 | 26 | 55  | 52  | 40  | 31 | 33 | 45  |
| SFF0764 | 29 | 36 | 30 | 95  | 94  | 73  | 62 | 72 | 74  |
| SFF0765 | 12 | 16 | 20 | 35  | 41  | 29  | 16 | 37 | 36  |
| SFF0767 | 13 | 9  | 7  | 21  | 19  | 22  | 19 | 22 | 14  |
| SFF0769 | 16 | 19 | 14 | 9   | 22  | 16  | 28 | 29 | 24  |
| SFF0770 | 15 | 9  | 10 | 28  | 29  | 22  | 18 | 24 | 29  |
| SFF0771 | 7  | 14 | 12 | 19  | 17  | 10  | 13 | 18 | 19  |
| SFF0772 | 19 | 27 | 11 | 31  | 24  | 26  | 25 | 27 | 24  |
| SFF0773 | 32 | 26 | 24 | 22  | 33  | 30  | 23 | 24 | 26  |
| SFF0774 | 1  | 1  | 1  | 37  | 19  | 16  | 16 | 30 | 35  |
| SFF0775 | 18 | 26 | 22 | 34  | 22  | 35  | 27 | 34 | 44  |
| SFF0776 | 13 | 9  | 9  | 17  | 15  | 12  | 17 | 25 | 23  |
| SFF0777 | 16 | 17 | 24 | 20  | 20  | 23  | 16 | 26 | 30  |
| SFF0778 | 16 | 16 | 17 | 14  | 11  | 8   | 14 | 26 | 26  |
| SFF0779 | 27 | 23 | 17 | 157 | 136 | 116 | 35 | 57 | 55  |

|         |    |    |    |     |     |     |     |     |     |
|---------|----|----|----|-----|-----|-----|-----|-----|-----|
| SFF0780 | 14 | 15 | 18 | 8   | 16  | 8   | 14  | 11  | 24  |
| SFF0783 | 25 | 23 | 25 | 109 | 100 | 87  | 49  | 70  | 63  |
| SFF0784 | 25 | 30 | 17 | 63  | 54  | 33  | 44  | 61  | 56  |
| SFF0785 | 32 | 41 | 31 | 31  | 35  | 37  | 37  | 37  | 36  |
| SFF0786 | 20 | 23 | 12 | 19  | 7   | 12  | 23  | 27  | 34  |
| SFF0787 | 9  | 15 | 5  | 26  | 31  | 17  | 10  | 11  | 15  |
| SFF0788 | 45 | 63 | 38 | 42  | 42  | 40  | 53  | 57  | 58  |
| SFF0789 | 31 | 36 | 34 | 37  | 45  | 32  | 43  | 31  | 36  |
| SFF0790 | 21 | 9  | 12 | 101 | 98  | 85  | 52  | 61  | 56  |
| SFF0792 | 2  | 2  | 5  | 7   | 10  | 9   | 9   | 5   | 5   |
| SFF0793 | 34 | 34 | 37 | 56  | 53  | 57  | 46  | 52  | 70  |
| SFF0794 | 21 | 13 | 18 | 32  | 25  | 19  | 27  | 36  | 30  |
| SFF0795 | 46 | 25 | 36 | 55  | 48  | 35  | 33  | 52  | 43  |
| SFF0796 | 8  | 4  | 5  | 14  | 11  | 15  | 5   | 12  | 8   |
| SFF0797 | 3  | 1  | 4  | 8   | 3   | 5   | 10  | 14  | 12  |
| SFF0798 | 19 | 24 | 12 | 18  | 31  | 23  | 21  | 28  | 22  |
| SFF0799 | 9  | 8  | 9  | 3   | 2   | 3   | 5   | 9   | 8   |
| SFF0803 | 28 | 20 | 24 | 21  | 18  | 11  | 18  | 20  | 29  |
| SFF0805 | 51 | 48 | 54 | 43  | 53  | 54  | 51  | 72  | 98  |
| SFF0806 | 21 | 16 | 16 | 23  | 21  | 24  | 27  | 15  | 28  |
| SFF0807 | 32 | 30 | 44 | 40  | 40  | 36  | 43  | 49  | 48  |
| SFF0810 | 10 | 3  | 8  | 22  | 28  | 13  | 21  | 24  | 27  |
| SFF0811 | 16 | 14 | 13 | 13  | 27  | 23  | 39  | 42  | 36  |
| SFF0812 | 20 | 21 | 12 | 37  | 37  | 25  | 29  | 28  | 31  |
| SFF0813 | 6  | 6  | 3  | 53  | 48  | 36  | 17  | 26  | 21  |
| SFF0814 | 9  | 7  | 4  | 12  | 9   | 6   | 10  | 8   | 8   |
| SFF0815 | 46 | 45 | 35 | 28  | 24  | 30  | 24  | 46  | 47  |
| SFF0816 | 23 | 11 | 20 | 341 | 318 | 270 | 184 | 280 | 224 |
| SFF0817 | 18 | 28 | 26 | 23  | 23  | 20  | 21  | 25  | 31  |
| SFF0818 | 17 | 17 | 19 | 18  | 23  | 30  | 22  | 31  | 16  |
| SFF0819 | 6  | 7  | 11 | 3   | 5   | 12  | 7   | 8   | 7   |
| SFF0820 | 1  | 0  | 0  | 6   | 9   | 7   | 10  | 6   | 4   |
| SFF0821 | 18 | 21 | 14 | 20  | 24  | 21  | 22  | 17  | 23  |
| SFF0823 | 25 | 23 | 20 | 100 | 71  | 54  | 36  | 57  | 49  |
| SFF0824 | 10 | 7  | 1  | 12  | 15  | 21  | 5   | 9   | 4   |
| SFF0825 | 21 | 27 | 36 | 37  | 45  | 36  | 31  | 39  | 35  |
| SFF0826 | 9  | 12 | 3  | 33  | 42  | 27  | 11  | 20  | 18  |
| SFF0827 | 12 | 16 | 19 | 70  | 69  | 58  | 34  | 53  | 36  |
| SFF0828 | 21 | 10 | 13 | 21  | 17  | 11  | 17  | 21  | 21  |
| SFF0829 | 8  | 7  | 10 | 5   | 8   | 13  | 17  | 30  | 25  |
| SFF0830 | 24 | 25 | 24 | 38  | 32  | 40  | 25  | 51  | 42  |

|         |    |    |    |     |     |     |     |     |     |
|---------|----|----|----|-----|-----|-----|-----|-----|-----|
| SFF0833 | 9  | 5  | 13 | 8   | 8   | 8   | 6   | 7   | 11  |
| SFF0834 | 19 | 16 | 17 | 51  | 47  | 35  | 43  | 43  | 57  |
| SFF0835 | 21 | 26 | 27 | 27  | 24  | 31  | 48  | 74  | 80  |
| SFF0837 | 22 | 28 | 23 | 41  | 26  | 31  | 45  | 38  | 52  |
| SFF0838 | 27 | 24 | 14 | 76  | 69  | 61  | 37  | 54  | 43  |
| SFF0839 | 30 | 42 | 40 | 63  | 38  | 44  | 32  | 32  | 40  |
| SFF0840 | 13 | 8  | 11 | 18  | 13  | 18  | 17  | 26  | 23  |
| SFF0841 | 31 | 28 | 18 | 62  | 42  | 40  | 32  | 49  | 33  |
| SFF0842 | 24 | 24 | 25 | 19  | 24  | 21  | 24  | 46  | 35  |
| SFF0843 | 14 | 13 | 8  | 19  | 19  | 16  | 20  | 30  | 35  |
| SFF0844 | 15 | 10 | 9  | 11  | 14  | 11  | 13  | 9   | 12  |
| SFF0845 | 13 | 15 | 12 | 29  | 22  | 18  | 15  | 23  | 15  |
| SFF0846 | 17 | 23 | 19 | 139 | 123 | 106 | 147 | 176 | 147 |
| SFF0847 | 31 | 35 | 30 | 31  | 34  | 36  | 45  | 42  | 38  |
| SFF0848 | 23 | 22 | 8  | 20  | 8   | 14  | 18  | 35  | 25  |
| SFF0850 | 16 | 21 | 18 | 19  | 28  | 36  | 19  | 33  | 26  |
| SFF0852 | 2  | 1  | 0  | 2   | 2   | 2   | 0   | 2   | 1   |
| SFF0853 | 8  | 14 | 4  | 55  | 33  | 38  | 25  | 35  | 50  |
| SFF0854 | 38 | 38 | 36 | 68  | 69  | 61  | 68  | 110 | 87  |
| SFF0855 | 5  | 6  | 2  | 7   | 10  | 6   | 9   | 8   | 4   |
| SFF0856 | 14 | 8  | 6  | 8   | 10  | 10  | 13  | 19  | 24  |
| SFF0857 | 14 | 19 | 15 | 37  | 23  | 26  | 25  | 41  | 41  |
| SFF0858 | 47 | 54 | 39 | 19  | 21  | 28  | 44  | 51  | 49  |
| SFF0859 | 6  | 13 | 15 | 30  | 34  | 27  | 15  | 20  | 15  |
| SFF0860 | 36 | 33 | 33 | 45  | 35  | 26  | 27  | 35  | 37  |
| SFF0861 | 24 | 17 | 14 | 19  | 21  | 15  | 13  | 26  | 20  |
| SFF0862 | 27 | 20 | 15 | 25  | 19  | 18  | 19  | 29  | 38  |
| SFF0864 | 26 | 17 | 14 | 29  | 29  | 26  | 19  | 27  | 23  |
| SFF0865 | 14 | 5  | 13 | 29  | 16  | 14  | 29  | 32  | 23  |
| SFF0866 | 9  | 13 | 7  | 89  | 87  | 80  | 28  | 56  | 44  |
| SFF0867 | 5  | 10 | 9  | 168 | 139 | 121 | 43  | 60  | 57  |
| SFF0868 | 19 | 15 | 13 | 108 | 95  | 91  | 42  | 58  | 42  |
| SFF0869 | 18 | 26 | 26 | 39  | 55  | 35  | 33  | 47  | 37  |
| SFF0870 | 22 | 19 | 22 | 41  | 56  | 40  | 22  | 43  | 41  |
| SFF0871 | 22 | 23 | 12 | 60  | 48  | 31  | 32  | 44  | 27  |
| SFF0872 | 20 | 20 | 16 | 30  | 28  | 22  | 17  | 21  | 31  |
| SFF0873 | 19 | 18 | 11 | 23  | 12  | 24  | 21  | 21  | 17  |
| SFF0874 | 9  | 13 | 14 | 11  | 14  | 21  | 20  | 29  | 21  |
| SFF0875 | 28 | 17 | 16 | 19  | 20  | 19  | 22  | 21  | 29  |
| SFF0876 | 5  | 6  | 7  | 102 | 90  | 76  | 53  | 75  | 49  |
| SFF0877 | 19 | 13 | 14 | 24  | 36  | 31  | 17  | 29  | 20  |

|         |    |    |    |     |     |     |     |     |     |
|---------|----|----|----|-----|-----|-----|-----|-----|-----|
| SFF0878 | 14 | 9  | 16 | 23  | 20  | 22  | 24  | 29  | 26  |
| SFF0879 | 10 | 14 | 19 | 31  | 27  | 21  | 13  | 24  | 25  |
| SFF0880 | 20 | 30 | 19 | 45  | 57  | 36  | 36  | 45  | 31  |
| SFF0881 | 17 | 18 | 17 | 12  | 10  | 19  | 10  | 20  | 17  |
| SFF0882 | 16 | 14 | 20 | 35  | 32  | 21  | 20  | 30  | 29  |
| SFF0883 | 48 | 40 | 44 | 176 | 179 | 132 | 94  | 106 | 102 |
| SFF0884 | 9  | 12 | 10 | 6   | 8   | 15  | 11  | 16  | 9   |
| SFF0888 | 21 | 23 | 25 | 130 | 150 | 95  | 65  | 78  | 79  |
| SFF0892 | 22 | 18 | 5  | 19  | 20  | 13  | 32  | 31  | 30  |
| SFF0893 | 15 | 18 | 12 | 60  | 39  | 44  | 59  | 73  | 65  |
| SFF0894 | 13 | 5  | 7  | 9   | 16  | 9   | 9   | 14  | 10  |
| SFF0895 | 22 | 12 | 13 | 56  | 50  | 52  | 35  | 40  | 33  |
| SFF0897 | 8  | 8  | 7  | 13  | 25  | 27  | 21  | 27  | 22  |
| SFF0899 | 33 | 34 | 32 | 64  | 54  | 62  | 35  | 49  | 47  |
| SFF0900 | 19 | 11 | 14 | 22  | 13  | 22  | 32  | 23  | 31  |
| SFF0902 | 13 | 10 | 14 | 18  | 11  | 13  | 15  | 22  | 32  |
| SFF0903 | 17 | 17 | 14 | 63  | 64  | 46  | 65  | 79  | 68  |
| SFF0904 | 28 | 24 | 21 | 59  | 46  | 47  | 24  | 41  | 44  |
| SFF0905 | 18 | 14 | 16 | 12  | 15  | 15  | 11  | 14  | 23  |
| SFF0906 | 29 | 27 | 22 | 94  | 90  | 72  | 56  | 104 | 80  |
| SFF0907 | 15 | 13 | 11 | 12  | 14  | 20  | 23  | 31  | 18  |
| SFF0908 | 39 | 40 | 38 | 38  | 45  | 31  | 33  | 53  | 45  |
| SFF0909 | 8  | 8  | 14 | 7   | 2   | 7   | 12  | 10  | 11  |
| SFF0911 | 19 | 8  | 6  | 122 | 114 | 80  | 55  | 51  | 49  |
| SFF0912 | 14 | 4  | 6  | 17  | 24  | 10  | 14  | 13  | 19  |
| SFF0913 | 7  | 8  | 9  | 7   | 12  | 11  | 3   | 5   | 7   |
| SFF0914 | 27 | 26 | 14 | 31  | 30  | 28  | 17  | 14  | 14  |
| SFF0915 | 32 | 28 | 26 | 20  | 29  | 25  | 29  | 41  | 33  |
| SFF0916 | 15 | 28 | 22 | 40  | 46  | 31  | 34  | 24  | 35  |
| SFF0917 | 27 | 19 | 18 | 40  | 40  | 27  | 28  | 39  | 59  |
| SFF0918 | 15 | 17 | 16 | 10  | 15  | 19  | 19  | 21  | 25  |
| SFF0919 | 21 | 21 | 21 | 164 | 145 | 120 | 73  | 101 | 63  |
| SFF0920 | 17 | 14 | 18 | 19  | 10  | 13  | 13  | 16  | 11  |
| SFF0922 | 10 | 14 | 8  | 104 | 87  | 87  | 59  | 80  | 61  |
| SFF0924 | 38 | 36 | 23 | 137 | 126 | 99  | 60  | 96  | 98  |
| SFF0926 | 20 | 20 | 25 | 32  | 37  | 34  | 15  | 27  | 25  |
| SFF0927 | 13 | 23 | 10 | 173 | 173 | 134 | 113 | 133 | 140 |
| SFF0929 | 17 | 10 | 9  | 11  | 14  | 11  | 18  | 22  | 19  |
| SFF0930 | 2  | 4  | 6  | 17  | 16  | 14  | 16  | 21  | 22  |
| SFF0931 | 18 | 17 | 16 | 12  | 14  | 15  | 9   | 22  | 22  |
| SFF0932 | 6  | 10 | 8  | 14  | 12  | 13  | 22  | 29  | 34  |

|         |    |    |    |     |     |     |     |     |     |
|---------|----|----|----|-----|-----|-----|-----|-----|-----|
| SFF0934 | 9  | 11 | 9  | 50  | 56  | 43  | 34  | 39  | 33  |
| SFF0935 | 27 | 21 | 31 | 114 | 70  | 71  | 38  | 49  | 57  |
| SFF0936 | 13 | 18 | 15 | 9   | 14  | 11  | 22  | 24  | 37  |
| SFF0937 | 45 | 45 | 43 | 150 | 165 | 143 | 79  | 104 | 81  |
| SFF0938 | 13 | 17 | 8  | 114 | 79  | 62  | 55  | 94  | 70  |
| SFF0939 | 10 | 16 | 23 | 25  | 22  | 22  | 23  | 25  | 25  |
| SFF0940 | 6  | 15 | 12 | 38  | 46  | 23  | 23  | 27  | 46  |
| SFF0941 | 30 | 25 | 24 | 17  | 12  | 13  | 17  | 21  | 28  |
| SFF0942 | 18 | 16 | 18 | 18  | 10  | 26  | 18  | 25  | 37  |
| SFF0943 | 12 | 20 | 9  | 115 | 105 | 85  | 73  | 82  | 68  |
| SFF0944 | 35 | 39 | 41 | 171 | 141 | 126 | 96  | 141 | 117 |
| SFF0945 | 10 | 14 | 16 | 27  | 32  | 16  | 17  | 33  | 22  |
| SFF0946 | 13 | 29 | 12 | 18  | 17  | 12  | 18  | 30  | 33  |
| SFF0947 | 18 | 21 | 11 | 31  | 30  | 19  | 23  | 37  | 30  |
| SFF0948 | 13 | 13 | 13 | 82  | 65  | 50  | 87  | 91  | 77  |
| SFF0949 | 18 | 20 | 15 | 19  | 16  | 21  | 6   | 17  | 10  |
| SFF0950 | 10 | 11 | 7  | 17  | 20  | 13  | 17  | 23  | 11  |
| SFF0953 | 14 | 17 | 14 | 34  | 45  | 28  | 26  | 30  | 32  |
| SFF0955 | 7  | 6  | 8  | 5   | 4   | 3   | 7   | 15  | 13  |
| SFF0956 | 2  | 4  | 4  | 6   | 6   | 2   | 6   | 9   | 10  |
| SFF0958 | 11 | 13 | 10 | 10  | 9   | 5   | 16  | 22  | 27  |
| SFF0960 | 16 | 21 | 17 | 15  | 30  | 26  | 13  | 24  | 24  |
| SFF0961 | 7  | 15 | 8  | 36  | 30  | 27  | 43  | 43  | 43  |
| SFF0962 | 21 | 19 | 12 | 35  | 26  | 28  | 20  | 29  | 33  |
| SFF0963 | 25 | 27 | 26 | 90  | 109 | 95  | 54  | 88  | 85  |
| SFF0964 | 22 | 25 | 17 | 24  | 20  | 22  | 25  | 24  | 33  |
| SFF0965 | 13 | 17 | 10 | 320 | 265 | 257 | 129 | 182 | 163 |
| SFF0967 | 17 | 17 | 9  | 50  | 49  | 49  | 36  | 40  | 30  |
| SFF0968 | 22 | 10 | 14 | 31  | 27  | 31  | 21  | 29  | 41  |
| SFF0969 | 31 | 32 | 33 | 68  | 70  | 46  | 52  | 63  | 65  |
| SFF0970 | 8  | 12 | 11 | 12  | 11  | 14  | 12  | 23  | 20  |
| SFF0971 | 7  | 20 | 9  | 13  | 7   | 6   | 16  | 11  | 18  |
| SFF0972 | 6  | 16 | 14 | 19  | 13  | 26  | 14  | 18  | 15  |
| SFF0973 | 16 | 15 | 8  | 32  | 25  | 19  | 16  | 14  | 17  |
| SFF0974 | 26 | 21 | 25 | 46  | 48  | 36  | 40  | 43  | 37  |
| SFF0975 | 8  | 8  | 6  | 4   | 13  | 11  | 7   | 11  | 7   |
| SFF0976 | 20 | 33 | 33 | 36  | 38  | 36  | 41  | 44  | 50  |
| SFF0977 | 3  | 6  | 3  | 102 | 94  | 90  | 49  | 67  | 72  |
| SFF0978 | 18 | 17 | 9  | 13  | 23  | 14  | 25  | 23  | 23  |
| SFF0979 | 20 | 23 | 21 | 137 | 117 | 98  | 109 | 140 | 127 |
| SFF0980 | 13 | 9  | 8  | 38  | 45  | 22  | 16  | 31  | 26  |

|         |    |    |    |     |     |     |     |     |     |
|---------|----|----|----|-----|-----|-----|-----|-----|-----|
| SFF0981 | 34 | 25 | 16 | 20  | 7   | 18  | 32  | 35  | 32  |
| SFF0982 | 20 | 19 | 14 | 28  | 32  | 26  | 25  | 21  | 26  |
| SFF0984 | 9  | 11 | 11 | 69  | 44  | 30  | 13  | 33  | 29  |
| SFF0985 | 21 | 12 | 17 | 10  | 13  | 11  | 16  | 28  | 32  |
| SFF0986 | 23 | 36 | 31 | 39  | 27  | 25  | 28  | 36  | 45  |
| SFF0987 | 28 | 30 | 27 | 97  | 84  | 63  | 57  | 95  | 92  |
| SFF0988 | 11 | 19 | 16 | 25  | 17  | 24  | 23  | 19  | 29  |
| SFF0989 | 12 | 18 | 13 | 19  | 14  | 14  | 28  | 23  | 50  |
| SFF0990 | 45 | 44 | 47 | 288 | 250 | 184 | 106 | 159 | 121 |
| SFF0993 | 8  | 14 | 15 | 24  | 17  | 17  | 33  | 36  | 40  |
| SFF0994 | 15 | 20 | 9  | 74  | 74  | 79  | 44  | 42  | 45  |
| SFF0995 | 17 | 9  | 10 | 13  | 8   | 11  | 14  | 27  | 12  |
| SFF0996 | 16 | 16 | 19 | 36  | 42  | 19  | 25  | 37  | 27  |
| SFF0998 | 10 | 11 | 9  | 37  | 20  | 28  | 26  | 34  | 27  |
| SFF0999 | 36 | 32 | 37 | 38  | 24  | 26  | 38  | 43  | 46  |
| SFF1003 | 14 | 24 | 15 | 51  | 46  | 42  | 19  | 30  | 31  |
| SFF1004 | 6  | 5  | 4  | 9   | 6   | 6   | 10  | 13  | 9   |
| SFF1005 | 13 | 15 | 12 | 27  | 28  | 21  | 25  | 35  | 31  |
| SFF1007 | 10 | 19 | 16 | 96  | 132 | 106 | 47  | 67  | 70  |
| SFF1008 | 3  | 5  | 5  | 20  | 24  | 23  | 8   | 10  | 10  |
| SFF1009 | 20 | 19 | 16 | 34  | 30  | 29  | 19  | 44  | 49  |
| SFF1010 | 11 | 13 | 15 | 22  | 16  | 17  | 22  | 15  | 30  |
| SFF1011 | 14 | 25 | 11 | 20  | 13  | 12  | 19  | 21  | 23  |
| SFF1013 | 20 | 25 | 19 | 27  | 23  | 21  | 21  | 20  | 24  |
| SFF1014 | 28 | 15 | 19 | 22  | 31  | 16  | 21  | 26  | 28  |
| SFF1015 | 16 | 16 | 21 | 12  | 16  | 21  | 16  | 24  | 25  |
| SFF1016 | 40 | 43 | 39 | 59  | 54  | 54  | 43  | 52  | 34  |
| SFF1019 | 32 | 24 | 27 | 71  | 53  | 40  | 35  | 50  | 42  |
| SFF1020 | 23 | 15 | 14 | 38  | 46  | 38  | 27  | 28  | 34  |
| SFF1021 | 11 | 14 | 7  | 76  | 73  | 52  | 59  | 73  | 75  |
| SFF1022 | 14 | 13 | 14 | 23  | 35  | 28  | 20  | 32  | 38  |
| SFF1023 | 10 | 8  | 13 | 33  | 23  | 20  | 36  | 34  | 36  |
| SFF1025 | 14 | 12 | 16 | 21  | 10  | 22  | 21  | 20  | 20  |
| SFF1028 | 20 | 39 | 16 | 36  | 28  | 21  | 30  | 27  | 40  |
| SFF1029 | 33 | 28 | 31 | 30  | 33  | 24  | 32  | 43  | 34  |
| SFF1030 | 19 | 20 | 13 | 56  | 49  | 53  | 20  | 29  | 22  |
| SFF1033 | 21 | 21 | 16 | 117 | 127 | 114 | 46  | 62  | 59  |
| SFF1035 | 7  | 4  | 2  | 14  | 12  | 9   | 13  | 10  | 12  |
| SFF1036 | 4  | 1  | 3  | 13  | 8   | 9   | 9   | 5   | 5   |
| SFF1037 | 18 | 16 | 17 | 26  | 12  | 20  | 22  | 23  | 22  |
| SFF1038 | 10 | 5  | 3  | 4   | 6   | 7   | 10  | 9   | 8   |

|         |    |    |    |     |     |    |    |    |    |
|---------|----|----|----|-----|-----|----|----|----|----|
| SFF1039 | 15 | 22 | 13 | 22  | 13  | 14 | 15 | 24 | 16 |
| SFF1040 | 27 | 38 | 25 | 32  | 28  | 28 | 35 | 33 | 28 |
| SFF1041 | 11 | 16 | 15 | 42  | 27  | 34 | 31 | 28 | 39 |
| SFF1042 | 7  | 5  | 4  | 55  | 39  | 27 | 25 | 32 | 27 |
| SFF1043 | 18 | 17 | 12 | 31  | 25  | 25 | 27 | 26 | 28 |
| SFF1044 | 22 | 16 | 19 | 15  | 21  | 19 | 24 | 15 | 25 |
| SFF1045 | 48 | 45 | 35 | 26  | 39  | 27 | 35 | 45 | 45 |
| SFF1046 | 38 | 38 | 28 | 123 | 114 | 78 | 58 | 66 | 72 |
| SFF1047 | 26 | 15 | 12 | 52  | 38  | 32 | 36 | 37 | 41 |
| SFF1048 | 12 | 12 | 14 | 29  | 31  | 24 | 23 | 38 | 29 |
| SFF1049 | 24 | 30 | 28 | 28  | 21  | 29 | 21 | 26 | 25 |
| SFF1050 | 17 | 22 | 13 | 26  | 29  | 32 | 32 | 42 | 56 |
| SFF1051 | 23 | 19 | 14 | 58  | 68  | 44 | 56 | 79 | 71 |
| SFF1052 | 21 | 11 | 14 | 24  | 16  | 14 | 20 | 19 | 30 |
| SFF1053 | 11 | 21 | 19 | 11  | 19  | 12 | 31 | 16 | 24 |
| SFF1054 | 16 | 23 | 19 | 27  | 32  | 36 | 27 | 32 | 27 |
| SFF1055 | 13 | 12 | 10 | 92  | 81  | 64 | 47 | 47 | 54 |
| SFF1056 | 20 | 24 | 19 | 25  | 21  | 12 | 27 | 28 | 26 |
| SFF1057 | 9  | 16 | 12 | 10  | 6   | 18 | 15 | 16 | 21 |
| SFF1058 | 48 | 47 | 34 | 52  | 44  | 41 | 47 | 52 | 53 |
| SFF1059 | 14 | 14 | 25 | 15  | 9   | 12 | 15 | 31 | 37 |
| SFF1060 | 22 | 27 | 10 | 72  | 71  | 54 | 30 | 38 | 25 |
| SFF1061 | 38 | 46 | 34 | 27  | 36  | 32 | 30 | 35 | 43 |
| SFF1063 | 14 | 12 | 9  | 11  | 8   | 13 | 16 | 23 | 31 |
| SFF1064 | 14 | 15 | 24 | 27  | 25  | 13 | 21 | 21 | 20 |
| SFF1067 | 6  | 11 | 5  | 13  | 5   | 7  | 14 | 10 | 20 |
| SFF1068 | 24 | 24 | 25 | 49  | 48  | 34 | 30 | 45 | 39 |
| SFF1069 | 10 | 12 | 10 | 47  | 29  | 34 | 16 | 17 | 36 |
| SFF1071 | 22 | 16 | 20 | 29  | 27  | 19 | 24 | 33 | 27 |
| SFF1072 | 8  | 9  | 6  | 9   | 12  | 10 | 17 | 19 | 13 |
| SFF1074 | 12 | 24 | 18 | 57  | 47  | 48 | 24 | 42 | 41 |
| SFF1075 | 29 | 39 | 28 | 27  | 36  | 35 | 35 | 35 | 27 |
| SFF1076 | 31 | 26 | 35 | 32  | 31  | 31 | 36 | 48 | 27 |
| SFF1077 | 40 | 41 | 47 | 52  | 56  | 48 | 44 | 45 | 55 |
| SFF1081 | 4  | 7  | 2  | 6   | 3   | 2  | 8  | 1  | 13 |
| SFF1082 | 25 | 34 | 24 | 49  | 37  | 24 | 31 | 39 | 46 |
| SFF1084 | 32 | 23 | 22 | 70  | 46  | 44 | 39 | 39 | 40 |
| SFF1085 | 32 | 26 | 28 | 49  | 43  | 39 | 42 | 62 | 62 |
| SFF1086 | 5  | 9  | 6  | 5   | 1   | 7  | 7  | 11 | 16 |
| SFF1087 | 23 | 28 | 14 | 21  | 13  | 13 | 35 | 27 | 26 |
| SFF1088 | 15 | 15 | 19 | 18  | 16  | 18 | 24 | 29 | 31 |

|         |    |    |    |     |     |     |     |     |     |
|---------|----|----|----|-----|-----|-----|-----|-----|-----|
| SFF1090 | 21 | 11 | 18 | 91  | 71  | 62  | 39  | 67  | 61  |
| SFF1091 | 16 | 27 | 26 | 155 | 159 | 129 | 65  | 80  | 55  |
| SFF1092 | 17 | 29 | 21 | 76  | 78  | 76  | 34  | 61  | 51  |
| SFF1093 | 14 | 13 | 11 | 16  | 11  | 20  | 22  | 22  | 26  |
| SFF1094 | 9  | 10 | 6  | 21  | 13  | 24  | 14  | 21  | 19  |
| SFF1096 | 12 | 20 | 18 | 19  | 17  | 19  | 22  | 33  | 29  |
| SFF1097 | 67 | 61 | 44 | 38  | 26  | 36  | 43  | 44  | 42  |
| SFF1098 | 35 | 26 | 30 | 41  | 32  | 24  | 31  | 48  | 49  |
| SFF1099 | 6  | 9  | 12 | 12  | 10  | 6   | 14  | 8   | 18  |
| SFF1100 | 20 | 11 | 18 | 127 | 115 | 95  | 41  | 65  | 55  |
| SFF1101 | 20 | 19 | 22 | 16  | 17  | 16  | 31  | 34  | 22  |
| SFF1102 | 13 | 20 | 22 | 36  | 33  | 22  | 40  | 37  | 32  |
| SFF1103 | 29 | 22 | 23 | 177 | 164 | 155 | 66  | 84  | 85  |
| SFF1104 | 52 | 35 | 43 | 20  | 17  | 24  | 43  | 42  | 44  |
| SFF1105 | 29 | 26 | 20 | 93  | 72  | 73  | 46  | 90  | 95  |
| SFF1106 | 45 | 38 | 37 | 54  | 59  | 39  | 26  | 55  | 43  |
| SFF1107 | 14 | 8  | 10 | 21  | 25  | 20  | 9   | 17  | 23  |
| SFF1108 | 11 | 16 | 15 | 39  | 40  | 23  | 22  | 33  | 21  |
| SFF1109 | 13 | 7  | 7  | 8   | 12  | 9   | 5   | 12  | 11  |
| SFF1110 | 21 | 21 | 13 | 30  | 13  | 25  | 16  | 23  | 27  |
| SFF1111 | 13 | 20 | 14 | 11  | 10  | 14  | 18  | 15  | 18  |
| SFF1112 | 55 | 54 | 45 | 131 | 104 | 100 | 80  | 111 | 102 |
| SFF1116 | 14 | 9  | 11 | 20  | 17  | 10  | 11  | 14  | 22  |
| SFF1120 | 34 | 27 | 15 | 179 | 211 | 138 | 105 | 129 | 104 |
| SFF1122 | 9  | 6  | 11 | 18  | 10  | 12  | 7   | 11  | 8   |
| SFF1123 | 26 | 14 | 12 | 13  | 30  | 26  | 19  | 35  | 37  |
| SFF1124 | 5  | 5  | 6  | 25  | 26  | 16  | 8   | 14  | 17  |
| SFF1125 | 9  | 14 | 19 | 26  | 25  | 24  | 25  | 30  | 23  |
| SFF1126 | 1  | 1  | 2  | 40  | 32  | 27  | 24  | 33  | 36  |
| SFF1129 | 70 | 57 | 61 | 39  | 48  | 32  | 49  | 65  | 63  |
| SFF1130 | 36 | 28 | 26 | 61  | 45  | 45  | 29  | 75  | 66  |
| SFF1131 | 26 | 29 | 27 | 39  | 47  | 44  | 26  | 29  | 32  |
| SFF1132 | 1  | 6  | 7  | 13  | 12  | 6   | 7   | 8   | 10  |
| SFF1133 | 21 | 37 | 26 | 56  | 63  | 52  | 28  | 40  | 41  |
| SFF1134 | 4  | 4  | 9  | 11  | 9   | 10  | 12  | 10  | 15  |
| SFF1135 | 7  | 11 | 8  | 24  | 20  | 18  | 14  | 18  | 17  |
| SFF1137 | 25 | 19 | 20 | 15  | 18  | 18  | 11  | 16  | 16  |
| SFF1138 | 6  | 7  | 5  | 10  | 7   | 13  | 5   | 11  | 15  |
| SFF1139 | 22 | 13 | 17 | 70  | 60  | 60  | 48  | 65  | 52  |
| SFF1140 | 19 | 19 | 8  | 19  | 15  | 13  | 18  | 24  | 13  |
| SFF1141 | 14 | 9  | 8  | 83  | 70  | 77  | 45  | 54  | 75  |



|         |    |    |    |     |     |     |     |     |     |
|---------|----|----|----|-----|-----|-----|-----|-----|-----|
| SFF1142 | 13 | 12 | 14 | 9   | 9   | 9   | 14  | 19  | 18  |
| SFF1143 | 26 | 23 | 16 | 58  | 43  | 54  | 34  | 45  | 53  |
| SFF1147 | 34 | 29 | 20 | 34  | 31  | 28  | 21  | 33  | 44  |
| SFF1148 | 11 | 14 | 10 | 72  | 62  | 36  | 37  | 44  | 38  |
| SFF1149 | 22 | 25 | 15 | 110 | 95  | 83  | 49  | 79  | 70  |
| SFF1150 | 21 | 16 | 16 | 100 | 101 | 76  | 43  | 69  | 53  |
| SFF1155 | 13 | 8  | 22 | 16  | 27  | 12  | 10  | 21  | 16  |
| SFF1158 | 9  | 5  | 10 | 15  | 14  | 17  | 19  | 16  | 15  |
| SFF1159 | 14 | 17 | 21 | 67  | 63  | 60  | 54  | 69  | 38  |
| SFF1160 | 31 | 24 | 15 | 32  | 40  | 23  | 19  | 30  | 40  |
| SFF1161 | 27 | 27 | 29 | 46  | 31  | 29  | 30  | 33  | 44  |
| SFF1162 | 17 | 12 | 12 | 9   | 18  | 13  | 21  | 25  | 12  |
| SFF1164 | 6  | 4  | 5  | 10  | 11  | 8   | 19  | 17  | 22  |
| SFF1166 | 44 | 31 | 20 | 27  | 25  | 19  | 25  | 30  | 25  |
| SFF1167 | 21 | 26 | 19 | 12  | 11  | 9   | 17  | 21  | 20  |
| SFF1168 | 16 | 13 | 16 | 47  | 47  | 28  | 29  | 40  | 31  |
| SFF1169 | 7  | 8  | 7  | 11  | 9   | 11  | 13  | 20  | 18  |
| SFF1170 | 28 | 25 | 18 | 61  | 55  | 48  | 37  | 48  | 53  |
| SFF1171 | 12 | 10 | 9  | 14  | 5   | 19  | 7   | 20  | 13  |
| SFF1172 | 6  | 4  | 2  | 55  | 43  | 33  | 41  | 63  | 63  |
| SFF1176 | 10 | 9  | 15 | 10  | 6   | 12  | 11  | 22  | 22  |
| SFF1177 | 27 | 28 | 13 | 22  | 24  | 28  | 19  | 30  | 24  |
| SFF1178 | 27 | 35 | 26 | 27  | 24  | 22  | 25  | 41  | 31  |
| SFF1179 | 14 | 14 | 14 | 15  | 9   | 16  | 6   | 22  | 34  |
| SFF1180 | 48 | 50 | 34 | 26  | 40  | 31  | 34  | 41  | 42  |
| SFF1181 | 5  | 14 | 8  | 23  | 21  | 15  | 17  | 15  | 26  |
| SFF1182 | 21 | 15 | 30 | 29  | 24  | 17  | 25  | 27  | 40  |
| SFF1183 | 28 | 42 | 49 | 53  | 40  | 44  | 38  | 55  | 50  |
| SFF1184 | 32 | 38 | 40 | 24  | 22  | 19  | 41  | 34  | 35  |
| SFF1185 | 17 | 19 | 18 | 24  | 22  | 16  | 24  | 32  | 39  |
| SFF1186 | 41 | 35 | 27 | 36  | 32  | 33  | 27  | 43  | 22  |
| SFF1187 | 24 | 26 | 35 | 29  | 33  | 38  | 23  | 46  | 31  |
| SFF1188 | 19 | 23 | 20 | 51  | 38  | 33  | 33  | 39  | 37  |
| SFF1189 | 6  | 6  | 6  | 30  | 30  | 22  | 21  | 16  | 18  |
| SFF1190 | 30 | 38 | 25 | 60  | 51  | 53  | 54  | 60  | 85  |
| SFF1191 | 16 | 13 | 18 | 18  | 13  | 8   | 14  | 23  | 24  |
| SFF1192 | 79 | 65 | 62 | 116 | 104 | 82  | 80  | 92  | 87  |
| SFF1193 | 24 | 20 | 32 | 53  | 42  | 44  | 32  | 49  | 40  |
| SFF1194 | 26 | 33 | 28 | 35  | 24  | 40  | 31  | 51  | 45  |
| SFF1195 | 53 | 47 | 56 | 266 | 254 | 156 | 112 | 186 | 149 |
| SFF1196 | 20 | 28 | 22 | 13  | 14  | 22  | 21  | 15  | 17  |

|         |    |    |    |     |     |     |     |     |     |
|---------|----|----|----|-----|-----|-----|-----|-----|-----|
| SFF1197 | 10 | 26 | 10 | 12  | 18  | 17  | 29  | 27  | 17  |
| SFF1198 | 13 | 7  | 7  | 42  | 40  | 37  | 23  | 25  | 38  |
| SFF1199 | 27 | 29 | 26 | 410 | 387 | 320 | 228 | 283 | 262 |
| SFF1200 | 19 | 11 | 13 | 43  | 51  | 29  | 28  | 45  | 28  |
| SFF1202 | 57 | 41 | 31 | 230 | 196 | 145 | 144 | 184 | 194 |
| SFF1203 | 7  | 9  | 5  | 1   | 4   | 1   | 7   | 12  | 10  |
| SFF1204 | 20 | 18 | 9  | 18  | 17  | 24  | 27  | 16  | 12  |
| SFF1205 | 14 | 12 | 16 | 20  | 17  | 21  | 13  | 22  | 29  |
| SFF1206 | 37 | 44 | 34 | 24  | 12  | 19  | 36  | 33  | 54  |
| SFF1207 | 25 | 41 | 25 | 21  | 30  | 22  | 25  | 36  | 32  |
| SFF1208 | 11 | 19 | 23 | 22  | 28  | 19  | 23  | 29  | 13  |
| SFF1209 | 33 | 35 | 36 | 39  | 41  | 31  | 36  | 39  | 40  |
| SFF1210 | 15 | 18 | 25 | 144 | 124 | 98  | 65  | 72  | 87  |
| SFF1211 | 8  | 16 | 9  | 13  | 12  | 7   | 12  | 18  | 14  |
| SFF1212 | 21 | 18 | 17 | 22  | 20  | 24  | 27  | 28  | 31  |
| SFF1213 | 11 | 19 | 14 | 59  | 44  | 47  | 27  | 28  | 38  |
| SFF1214 | 23 | 38 | 20 | 28  | 24  | 22  | 24  | 21  | 24  |
| SFF1215 | 34 | 17 | 23 | 73  | 79  | 65  | 45  | 75  | 57  |
| SFF1216 | 5  | 5  | 3  | 27  | 27  | 24  | 14  | 13  | 15  |
| SFF1217 | 1  | 9  | 3  | 29  | 42  | 23  | 28  | 45  | 48  |
| SFF1218 | 13 | 9  | 6  | 15  | 8   | 5   | 25  | 35  | 38  |
| SFF1219 | 29 | 33 | 27 | 89  | 74  | 60  | 53  | 54  | 59  |
| SFF1220 | 14 | 9  | 6  | 9   | 12  | 14  | 12  | 21  | 13  |
| SFF1222 | 18 | 21 | 23 | 17  | 29  | 28  | 20  | 25  | 36  |
| SFF1223 | 15 | 17 | 7  | 26  | 11  | 12  | 23  | 17  | 16  |
| SFF1224 | 11 | 6  | 13 | 15  | 21  | 13  | 24  | 21  | 24  |
| SFF1225 | 19 | 21 | 15 | 25  | 21  | 22  | 16  | 20  | 24  |
| SFF1226 | 19 | 30 | 15 | 40  | 46  | 39  | 35  | 42  | 40  |
| SFF1227 | 32 | 25 | 30 | 25  | 25  | 24  | 19  | 18  | 28  |
| SFF1228 | 4  | 4  | 4  | 3   | 4   | 2   | 2   | 4   | 12  |
| SFF1229 | 24 | 30 | 24 | 23  | 25  | 35  | 27  | 40  | 33  |
| SFF1230 | 8  | 15 | 10 | 34  | 44  | 32  | 29  | 35  | 28  |
| SFF1231 | 10 | 9  | 13 | 26  | 20  | 16  | 15  | 12  | 25  |
| SFF1232 | 9  | 5  | 12 | 58  | 65  | 74  | 23  | 15  | 21  |
| SFF1233 | 12 | 10 | 13 | 4   | 6   | 6   | 16  | 13  | 16  |
| SFF1234 | 15 | 16 | 14 | 50  | 35  | 43  | 30  | 39  | 46  |
| SFF1235 | 11 | 18 | 13 | 9   | 19  | 14  | 12  | 10  | 12  |
| SFF1236 | 14 | 12 | 8  | 12  | 18  | 18  | 19  | 21  | 38  |
| SFF1237 | 7  | 2  | 3  | 16  | 4   | 8   | 15  | 19  | 17  |
| SFF1238 | 33 | 44 | 26 | 64  | 69  | 52  | 44  | 54  | 59  |
| SFF1239 | 34 | 34 | 19 | 218 | 189 | 145 | 85  | 97  | 89  |

|         |    |    |    |     |     |     |    |     |     |
|---------|----|----|----|-----|-----|-----|----|-----|-----|
| SFF1240 | 8  | 15 | 9  | 50  | 41  | 37  | 34 | 41  | 35  |
| SFF1241 | 25 | 16 | 19 | 54  | 55  | 49  | 18 | 37  | 31  |
| SFF1242 | 14 | 8  | 8  | 21  | 22  | 17  | 29 | 22  | 29  |
| SFF1243 | 2  | 4  | 2  | 15  | 4   | 3   | 10 | 10  | 17  |
| SFF1244 | 9  | 10 | 6  | 8   | 9   | 9   | 13 | 13  | 13  |
| SFF1245 | 33 | 27 | 23 | 56  | 54  | 47  | 37 | 44  | 48  |
| SFF1246 | 15 | 21 | 17 | 50  | 32  | 27  | 41 | 42  | 45  |
| SFF1247 | 29 | 27 | 15 | 38  | 24  | 37  | 24 | 37  | 36  |
| SFF1248 | 9  | 16 | 15 | 16  | 23  | 15  | 26 | 35  | 26  |
| SFF1249 | 18 | 18 | 14 | 19  | 20  | 10  | 19 | 21  | 29  |
| SFF1250 | 15 | 28 | 21 | 56  | 48  | 43  | 62 | 66  | 61  |
| SFF1251 | 14 | 19 | 11 | 12  | 9   | 8   | 17 | 25  | 23  |
| SFF1252 | 6  | 9  | 9  | 11  | 11  | 15  | 11 | 8   | 24  |
| SFF1253 | 7  | 16 | 17 | 9   | 11  | 13  | 9  | 13  | 18  |
| SFF1254 | 13 | 19 | 22 | 30  | 20  | 20  | 27 | 26  | 35  |
| SFF1255 | 10 | 13 | 4  | 12  | 14  | 10  | 11 | 16  | 10  |
| SFF1256 | 27 | 22 | 18 | 12  | 12  | 16  | 20 | 23  | 37  |
| SFF1258 | 31 | 30 | 36 | 23  | 29  | 34  | 34 | 39  | 32  |
| SFF1259 | 24 | 18 | 16 | 33  | 42  | 22  | 19 | 32  | 35  |
| SFF1260 | 14 | 16 | 12 | 83  | 70  | 61  | 52 | 77  | 54  |
| SFF1261 | 15 | 16 | 6  | 13  | 16  | 12  | 18 | 22  | 19  |
| SFF1262 | 31 | 30 | 30 | 165 | 134 | 114 | 88 | 126 | 115 |
| SFF1263 | 25 | 27 | 21 | 42  | 29  | 27  | 27 | 35  | 43  |
| SFF1264 | 9  | 18 | 13 | 44  | 34  | 35  | 21 | 38  | 31  |
| SFF1270 | 25 | 28 | 23 | 29  | 25  | 32  | 40 | 45  | 51  |
| SFF1271 | 27 | 16 | 17 | 48  | 36  | 27  | 34 | 48  | 48  |
| SFF1272 | 29 | 27 | 16 | 14  | 12  | 11  | 27 | 42  | 34  |
| SFF1274 | 13 | 13 | 14 | 22  | 40  | 20  | 29 | 26  | 17  |
| SFF1275 | 12 | 14 | 15 | 38  | 36  | 29  | 22 | 21  | 27  |
| SFF1276 | 17 | 27 | 14 | 17  | 18  | 25  | 26 | 32  | 28  |
| SFF1277 | 15 | 15 | 12 | 32  | 20  | 23  | 27 | 35  | 35  |
| SFF1278 | 22 | 17 | 16 | 25  | 29  | 17  | 15 | 24  | 40  |
| SFF1279 | 34 | 39 | 34 | 40  | 38  | 28  | 43 | 48  | 52  |
| SFF1282 | 20 | 23 | 15 | 31  | 24  | 34  | 31 | 35  | 31  |
| SFF1285 | 10 | 9  | 13 | 29  | 27  | 21  | 19 | 24  | 28  |
| SFF1286 | 24 | 23 | 20 | 29  | 28  | 26  | 36 | 44  | 30  |
| SFF1287 | 11 | 13 | 12 | 10  | 9   | 7   | 12 | 22  | 10  |
| SFF1290 | 31 | 28 | 24 | 36  | 38  | 23  | 38 | 43  | 40  |
| SFF1291 | 32 | 24 | 32 | 25  | 21  | 20  | 31 | 43  | 55  |
| SFF1292 | 10 | 16 | 17 | 13  | 8   | 9   | 14 | 13  | 20  |
| SFF1294 | 5  | 0  | 1  | 7   | 7   | 1   | 3  | 6   | 4   |

|         |    |    |    |     |     |     |     |     |     |
|---------|----|----|----|-----|-----|-----|-----|-----|-----|
| SFF1295 | 7  | 7  | 16 | 2   | 3   | 3   | 5   | 8   | 5   |
| SFF1296 | 20 | 21 | 17 | 22  | 23  | 20  | 19  | 24  | 19  |
| SFF1297 | 13 | 9  | 16 | 12  | 9   | 10  | 17  | 18  | 17  |
| SFF1299 | 6  | 8  | 18 | 55  | 51  | 50  | 45  | 81  | 64  |
| SFF1300 | 0  | 2  | 1  | 1   | 1   | 2   | 0   | 3   | 0   |
| SFF1302 | 13 | 13 | 16 | 30  | 36  | 22  | 23  | 30  | 20  |
| SFF1303 | 22 | 19 | 13 | 17  | 14  | 14  | 17  | 18  | 26  |
| SFF1304 | 16 | 10 | 12 | 13  | 11  | 9   | 7   | 10  | 11  |
| SFF1305 | 30 | 19 | 15 | 18  | 19  | 24  | 12  | 26  | 17  |
| SFF1308 | 14 | 14 | 5  | 36  | 25  | 27  | 41  | 58  | 51  |
| SFF1310 | 17 | 32 | 22 | 31  | 26  | 40  | 29  | 46  | 49  |
| SFF1311 | 15 | 22 | 22 | 15  | 20  | 19  | 22  | 28  | 20  |
| SFF1312 | 25 | 17 | 23 | 39  | 29  | 27  | 23  | 20  | 31  |
| SFF1313 | 43 | 39 | 41 | 37  | 25  | 28  | 28  | 38  | 36  |
| SFF1314 | 26 | 35 | 26 | 37  | 28  | 18  | 37  | 47  | 53  |
| SFF1316 | 18 | 12 | 22 | 36  | 21  | 37  | 27  | 26  | 35  |
| SFF1317 | 30 | 20 | 19 | 39  | 31  | 23  | 38  | 39  | 24  |
| SFF1318 | 17 | 28 | 14 | 31  | 34  | 29  | 25  | 36  | 35  |
| SFF1319 | 13 | 13 | 10 | 45  | 42  | 36  | 30  | 31  | 42  |
| SFF1320 | 15 | 17 | 11 | 15  | 26  | 14  | 14  | 23  | 19  |
| SFF1321 | 7  | 25 | 9  | 23  | 21  | 24  | 23  | 34  | 33  |
| SFF1322 | 12 | 21 | 10 | 53  | 35  | 36  | 27  | 33  | 22  |
| SFF1324 | 27 | 21 | 15 | 24  | 30  | 29  | 23  | 20  | 25  |
| SFF1325 | 35 | 46 | 22 | 122 | 101 | 96  | 64  | 72  | 66  |
| SFF1326 | 12 | 13 | 10 | 23  | 13  | 18  | 17  | 21  | 14  |
| SFF1327 | 15 | 17 | 14 | 36  | 15  | 35  | 32  | 43  | 54  |
| SFF1328 | 12 | 11 | 17 | 18  | 20  | 16  | 15  | 18  | 24  |
| SFF1330 | 13 | 17 | 8  | 197 | 176 | 149 | 61  | 83  | 73  |
| SFF1331 | 13 | 9  | 16 | 28  | 25  | 24  | 12  | 21  | 36  |
| SFF1332 | 35 | 33 | 33 | 480 | 414 | 318 | 337 | 395 | 412 |
| SFF1333 | 23 | 15 | 15 | 231 | 203 | 136 | 111 | 152 | 119 |
| SFF1335 | 12 | 6  | 11 | 14  | 15  | 15  | 9   | 17  | 21  |
| SFF1336 | 10 | 18 | 13 | 110 | 76  | 69  | 45  | 52  | 37  |
| SFF1337 | 20 | 21 | 13 | 51  | 43  | 41  | 32  | 27  | 38  |
| SFF1338 | 10 | 12 | 7  | 43  | 43  | 35  | 25  | 26  | 22  |
| SFF1339 | 7  | 9  | 15 | 18  | 5   | 12  | 12  | 14  | 17  |
| SFF1340 | 10 | 13 | 17 | 36  | 29  | 29  | 26  | 22  | 31  |
| SFF1341 | 10 | 4  | 14 | 8   | 7   | 6   | 7   | 16  | 10  |
| SFF1342 | 5  | 13 | 5  | 9   | 11  | 9   | 4   | 9   | 11  |
| SFF1343 | 10 | 13 | 5  | 15  | 18  | 12  | 21  | 32  | 39  |
| SFF1344 | 14 | 10 | 7  | 21  | 16  | 11  | 9   | 26  | 26  |

|         |    |    |    |     |     |    |    |    |    |
|---------|----|----|----|-----|-----|----|----|----|----|
| SFF1347 | 19 | 12 | 16 | 11  | 16  | 13 | 13 | 16 | 21 |
| SFF1348 | 22 | 16 | 15 | 15  | 13  | 16 | 16 | 15 | 20 |
| SFF1349 | 15 | 19 | 25 | 38  | 42  | 26 | 35 | 34 | 36 |
| SFF1350 | 12 | 8  | 15 | 10  | 4   | 9  | 21 | 22 | 33 |
| SFF1351 | 5  | 12 | 3  | 63  | 54  | 47 | 14 | 21 | 31 |
| SFF1352 | 15 | 10 | 14 | 37  | 30  | 19 | 30 | 34 | 24 |
| SFF1353 | 9  | 6  | 7  | 43  | 37  | 39 | 25 | 30 | 34 |
| SFF1354 | 17 | 25 | 24 | 48  | 42  | 29 | 47 | 50 | 36 |
| SFF1355 | 12 | 4  | 8  | 13  | 21  | 12 | 8  | 5  | 12 |
| SFF1356 | 12 | 17 | 15 | 26  | 22  | 22 | 18 | 33 | 25 |
| SFF1357 | 9  | 12 | 12 | 11  | 16  | 17 | 14 | 20 | 14 |
| SFF1358 | 18 | 14 | 24 | 37  | 21  | 24 | 33 | 31 | 34 |
| SFF1360 | 20 | 13 | 16 | 25  | 28  | 26 | 29 | 26 | 23 |
| SFF1361 | 58 | 78 | 73 | 60  | 60  | 45 | 56 | 71 | 73 |
| SFF1363 | 14 | 11 | 9  | 75  | 80  | 68 | 34 | 44 | 60 |
| SFF1364 | 6  | 14 | 11 | 8   | 12  | 6  | 8  | 15 | 9  |
| SFF1365 | 4  | 14 | 9  | 12  | 15  | 13 | 13 | 13 | 23 |
| SFF1366 | 6  | 12 | 15 | 61  | 40  | 46 | 24 | 39 | 30 |
| SFF1367 | 0  | 0  | 0  | 3   | 2   | 3  | 1  | 1  | 0  |
| SFF1368 | 14 | 13 | 15 | 24  | 27  | 16 | 15 | 34 | 27 |
| SFF1369 | 24 | 21 | 17 | 30  | 23  | 16 | 22 | 28 | 23 |
| SFF1370 | 15 | 15 | 13 | 88  | 104 | 83 | 35 | 31 | 41 |
| SFF1371 | 5  | 16 | 10 | 19  | 27  | 12 | 11 | 21 | 20 |
| SFF1373 | 32 | 25 | 29 | 33  | 28  | 35 | 48 | 55 | 55 |
| SFF1374 | 26 | 17 | 16 | 120 | 102 | 76 | 51 | 59 | 59 |
| SFF1375 | 21 | 13 | 13 | 15  | 26  | 16 | 17 | 25 | 26 |
| SFF1376 | 19 | 20 | 11 | 71  | 55  | 43 | 37 | 54 | 46 |
| SFF1377 | 22 | 34 | 15 | 56  | 66  | 57 | 40 | 52 | 55 |
| SFF1378 | 7  | 5  | 2  | 5   | 4   | 9  | 5  | 1  | 3  |
| SFF1380 | 28 | 26 | 17 | 30  | 34  | 31 | 35 | 34 | 33 |
| SFF1386 | 24 | 26 | 22 | 26  | 27  | 28 | 26 | 36 | 32 |
| SFF1390 | 1  | 3  | 2  | 1   | 2   | 3  | 2  | 8  | 8  |
| SFF1391 | 37 | 31 | 20 | 55  | 59  | 52 | 32 | 51 | 45 |
| SFF1392 | 15 | 13 | 14 | 27  | 23  | 18 | 13 | 22 | 19 |
| SFF1393 | 14 | 9  | 7  | 7   | 15  | 16 | 19 | 13 | 14 |
| SFF1394 | 14 | 21 | 16 | 30  | 28  | 26 | 33 | 27 | 29 |
| SFF1395 | 22 | 19 | 19 | 32  | 25  | 22 | 30 | 31 | 49 |
| SFF1398 | 21 | 23 | 33 | 34  | 28  | 25 | 32 | 51 | 56 |
| SFF1399 | 2  | 8  | 6  | 6   | 12  | 8  | 8  | 11 | 7  |
| SFF1400 | 17 | 22 | 13 | 27  | 28  | 23 | 17 | 32 | 20 |
| SFF1401 | 27 | 16 | 19 | 34  | 32  | 33 | 29 | 49 | 34 |

|         |    |    |    |     |     |     |     |     |     |
|---------|----|----|----|-----|-----|-----|-----|-----|-----|
| SFF1402 | 19 | 18 | 22 | 11  | 13  | 8   | 10  | 17  | 23  |
| SFF1403 | 20 | 28 | 24 | 28  | 23  | 22  | 30  | 52  | 53  |
| SFF1404 | 9  | 12 | 12 | 22  | 23  | 10  | 13  | 21  | 11  |
| SFF1405 | 16 | 17 | 14 | 54  | 59  | 44  | 68  | 78  | 76  |
| SFF1406 | 13 | 11 | 14 | 5   | 6   | 11  | 14  | 8   | 8   |
| SFF1407 | 27 | 29 | 26 | 23  | 9   | 23  | 30  | 32  | 29  |
| SFF1408 | 14 | 21 | 21 | 18  | 14  | 17  | 16  | 18  | 10  |
| SFF1410 | 1  | 0  | 3  | 7   | 1   | 4   | 11  | 10  | 6   |
| SFF1411 | 18 | 13 | 19 | 29  | 21  | 16  | 22  | 30  | 25  |
| SFF1412 | 11 | 14 | 12 | 23  | 21  | 28  | 15  | 16  | 18  |
| SFF1413 | 13 | 15 | 10 | 12  | 19  | 16  | 22  | 32  | 12  |
| SFF1414 | 4  | 1  | 4  | 11  | 5   | 5   | 6   | 10  | 10  |
| SFF1415 | 2  | 5  | 5  | 18  | 22  | 21  | 15  | 9   | 7   |
| SFF1417 | 29 | 43 | 41 | 54  | 69  | 49  | 57  | 75  | 68  |
| SFF1421 | 7  | 8  | 4  | 39  | 29  | 27  | 24  | 12  | 18  |
| SFF1422 | 7  | 10 | 4  | 36  | 46  | 41  | 12  | 17  | 17  |
| SFF1423 | 18 | 18 | 10 | 28  | 14  | 12  | 28  | 31  | 44  |
| SFF1424 | 18 | 21 | 16 | 31  | 27  | 20  | 19  | 35  | 34  |
| SFF1425 | 14 | 16 | 13 | 12  | 20  | 14  | 28  | 17  | 23  |
| SFF1427 | 42 | 45 | 30 | 17  | 13  | 16  | 21  | 26  | 32  |
| SFF1428 | 16 | 24 | 18 | 35  | 17  | 26  | 23  | 40  | 32  |
| SFF1429 | 43 | 29 | 28 | 177 | 144 | 133 | 66  | 98  | 92  |
| SFF1433 | 14 | 10 | 14 | 14  | 9   | 9   | 10  | 16  | 20  |
| SFF1435 | 27 | 37 | 21 | 23  | 30  | 29  | 24  | 37  | 33  |
| SFF1440 | 8  | 10 | 11 | 28  | 28  | 27  | 20  | 31  | 29  |
| SFF1441 | 23 | 15 | 15 | 22  | 18  | 23  | 19  | 45  | 32  |
| SFF1442 | 11 | 12 | 12 | 21  | 33  | 29  | 28  | 26  | 32  |
| SFF1445 | 21 | 31 | 22 | 29  | 25  | 36  | 39  | 38  | 38  |
| SFF1447 | 8  | 15 | 10 | 119 | 112 | 119 | 35  | 44  | 47  |
| SFF1448 | 17 | 12 | 12 | 10  | 12  | 12  | 15  | 14  | 13  |
| SFF1449 | 33 | 45 | 31 | 73  | 68  | 52  | 45  | 61  | 54  |
| SFF1450 | 56 | 56 | 60 | 57  | 39  | 44  | 58  | 57  | 68  |
| SFF1451 | 30 | 14 | 25 | 14  | 18  | 19  | 19  | 28  | 31  |
| SFF1453 | 8  | 5  | 2  | 9   | 4   | 7   | 4   | 8   | 8   |
| SFF1454 | 29 | 22 | 25 | 33  | 23  | 18  | 42  | 39  | 50  |
| SFF1455 | 12 | 14 | 14 | 7   | 9   | 15  | 16  | 13  | 14  |
| SFF1456 | 11 | 14 | 6  | 13  | 9   | 13  | 20  | 20  | 27  |
| SFF1461 | 43 | 39 | 23 | 535 | 448 | 364 | 308 | 423 | 405 |
| SFF1462 | 17 | 14 | 15 | 21  | 19  | 13  | 12  | 30  | 25  |
| SFF1463 | 34 | 26 | 25 | 42  | 45  | 44  | 33  | 35  | 46  |
| SFF1464 | 7  | 7  | 11 | 24  | 19  | 20  | 10  | 13  | 13  |

|         |    |    |    |     |     |     |     |     |     |
|---------|----|----|----|-----|-----|-----|-----|-----|-----|
| SFF1466 | 62 | 64 | 51 | 81  | 69  | 71  | 58  | 86  | 69  |
| SFF1467 | 45 | 62 | 50 | 40  | 33  | 44  | 33  | 43  | 50  |
| SFF1468 | 3  | 7  | 3  | 2   | 1   | 4   | 5   | 3   | 3   |
| SFF1469 | 12 | 8  | 11 | 86  | 40  | 44  | 46  | 61  | 63  |
| SFF1470 | 18 | 16 | 11 | 17  | 19  | 12  | 24  | 36  | 28  |
| SFF1471 | 6  | 3  | 3  | 10  | 23  | 16  | 15  | 14  | 16  |
| SFF1472 | 6  | 4  | 6  | 7   | 5   | 4   | 2   | 3   | 6   |
| SFF1473 | 24 | 20 | 13 | 56  | 45  | 52  | 30  | 41  | 37  |
| SFF1475 | 21 | 11 | 9  | 14  | 13  | 13  | 19  | 17  | 18  |
| SFF1477 | 4  | 11 | 14 | 118 | 105 | 89  | 48  | 45  | 54  |
| SFF1478 | 6  | 4  | 4  | 22  | 32  | 29  | 15  | 9   | 13  |
| SFF1479 | 10 | 9  | 10 | 35  | 35  | 23  | 15  | 27  | 22  |
| SFF1480 | 25 | 32 | 15 | 24  | 26  | 18  | 22  | 23  | 24  |
| SFF1481 | 11 | 21 | 15 | 21  | 28  | 10  | 21  | 22  | 23  |
| SFF1482 | 85 | 68 | 56 | 41  | 52  | 45  | 41  | 46  | 47  |
| SFF1483 | 23 | 16 | 19 | 6   | 14  | 15  | 10  | 26  | 16  |
| SFF1486 | 14 | 17 | 10 | 12  | 12  | 16  | 10  | 16  | 27  |
| SFF1487 | 13 | 24 | 19 | 61  | 82  | 68  | 30  | 44  | 52  |
| SFF1488 | 9  | 9  | 16 | 8   | 9   | 10  | 12  | 22  | 26  |
| SFF1489 | 13 | 16 | 13 | 29  | 31  | 27  | 24  | 39  | 28  |
| SFF1490 | 15 | 25 | 19 | 26  | 30  | 34  | 28  | 40  | 29  |
| SFF1493 | 4  | 13 | 13 | 8   | 11  | 16  | 17  | 15  | 13  |
| SFF1494 | 29 | 23 | 34 | 51  | 42  | 47  | 36  | 56  | 47  |
| SFF1495 | 12 | 21 | 19 | 47  | 28  | 43  | 21  | 33  | 41  |
| SFF1496 | 23 | 35 | 24 | 46  | 39  | 31  | 35  | 40  | 37  |
| SFF1497 | 32 | 40 | 30 | 39  | 39  | 27  | 23  | 26  | 31  |
| SFF1498 | 9  | 16 | 12 | 23  | 24  | 17  | 12  | 24  | 12  |
| SFF1501 | 11 | 23 | 20 | 26  | 23  | 19  | 26  | 31  | 29  |
| SFF1502 | 17 | 15 | 17 | 106 | 93  | 79  | 43  | 45  | 57  |
| SFF1503 | 33 | 30 | 25 | 61  | 69  | 50  | 55  | 78  | 85  |
| SFF1504 | 4  | 2  | 9  | 14  | 9   | 7   | 5   | 16  | 15  |
| SFF1505 | 15 | 25 | 27 | 20  | 23  | 24  | 34  | 41  | 37  |
| SFF1506 | 23 | 30 | 25 | 43  | 46  | 35  | 21  | 45  | 46  |
| SFF1507 | 27 | 33 | 25 | 20  | 29  | 28  | 24  | 34  | 45  |
| SFF1508 | 15 | 15 | 20 | 40  | 29  | 31  | 25  | 31  | 38  |
| SFF1509 | 25 | 32 | 18 | 26  | 23  | 21  | 20  | 31  | 24  |
| SFF1510 | 24 | 15 | 23 | 22  | 20  | 16  | 23  | 25  | 30  |
| SFF1511 | 39 | 40 | 36 | 27  | 30  | 30  | 32  | 49  | 58  |
| SFF1512 | 19 | 19 | 10 | 215 | 211 | 158 | 126 | 147 | 144 |
| SFF1513 | 19 | 26 | 22 | 30  | 34  | 33  | 27  | 31  | 32  |
| SFF1517 | 4  | 8  | 5  | 1   | 2   | 2   | 13  | 5   | 14  |

|         |    |    |    |     |     |     |     |     |     |
|---------|----|----|----|-----|-----|-----|-----|-----|-----|
| SFF1518 | 6  | 9  | 12 | 41  | 42  | 31  | 25  | 38  | 39  |
| SFF1519 | 18 | 15 | 12 | 17  | 21  | 18  | 20  | 37  | 40  |
| SFF1520 | 13 | 13 | 7  | 16  | 13  | 16  | 19  | 19  | 31  |
| SFF1521 | 19 | 15 | 16 | 14  | 12  | 13  | 25  | 23  | 19  |
| SFF1523 | 25 | 19 | 16 | 25  | 20  | 20  | 32  | 26  | 37  |
| SFF1526 | 6  | 11 | 9  | 34  | 39  | 29  | 24  | 28  | 33  |
| SFF1527 | 23 | 24 | 24 | 30  | 27  | 30  | 30  | 36  | 28  |
| SFF1528 | 4  | 4  | 4  | 1   | 4   | 5   | 0   | 3   | 4   |
| SFF1531 | 21 | 35 | 20 | 47  | 56  | 49  | 29  | 59  | 36  |
| SFF1532 | 18 | 15 | 13 | 26  | 40  | 38  | 25  | 34  | 40  |
| SFF1534 | 39 | 36 | 30 | 33  | 36  | 29  | 27  | 39  | 44  |
| SFF1535 | 21 | 16 | 18 | 18  | 13  | 14  | 25  | 17  | 33  |
| SFF1536 | 19 | 17 | 14 | 42  | 34  | 35  | 32  | 27  | 33  |
| SFF1537 | 7  | 17 | 19 | 37  | 45  | 37  | 27  | 33  | 30  |
| SFF1538 | 32 | 29 | 30 | 54  | 54  | 53  | 43  | 54  | 53  |
| SFF1539 | 20 | 10 | 11 | 44  | 43  | 40  | 31  | 52  | 44  |
| SFF1540 | 30 | 32 | 24 | 30  | 28  | 25  | 20  | 41  | 34  |
| SFF1541 | 18 | 21 | 11 | 43  | 41  | 31  | 44  | 43  | 38  |
| SFF1543 | 24 | 24 | 18 | 20  | 25  | 15  | 24  | 25  | 30  |
| SFF1544 | 38 | 41 | 38 | 63  | 52  | 47  | 38  | 43  | 46  |
| SFF1546 | 25 | 13 | 18 | 58  | 66  | 52  | 33  | 50  | 54  |
| SFF1547 | 24 | 17 | 23 | 32  | 28  | 32  | 21  | 24  | 23  |
| SFF1548 | 16 | 9  | 11 | 291 | 249 | 230 | 128 | 187 | 163 |
| SFF1549 | 21 | 33 | 31 | 122 | 123 | 123 | 79  | 85  | 109 |
| SFF1551 | 21 | 11 | 12 | 45  | 51  | 36  | 33  | 35  | 34  |
| SFF1552 | 23 | 32 | 16 | 53  | 53  | 42  | 27  | 39  | 33  |
| SFF1553 | 12 | 26 | 20 | 17  | 21  | 17  | 20  | 19  | 31  |
| SFF1554 | 9  | 14 | 14 | 30  | 19  | 12  | 20  | 29  | 20  |
| SFF1555 | 19 | 21 | 15 | 14  | 14  | 16  | 5   | 12  | 14  |
| SFF1557 | 17 | 15 | 16 | 22  | 22  | 16  | 16  | 23  | 19  |
| SFF1558 | 23 | 28 | 30 | 22  | 26  | 17  | 28  | 51  | 36  |
| SFF1559 | 24 | 24 | 30 | 42  | 54  | 24  | 29  | 41  | 45  |
| SFF1560 | 35 | 37 | 19 | 44  | 45  | 44  | 27  | 26  | 31  |
| SFF1561 | 8  | 32 | 19 | 27  | 14  | 20  | 16  | 21  | 25  |
| SFF1562 | 2  | 3  | 2  | 11  | 15  | 9   | 4   | 9   | 9   |
| SFF1563 | 9  | 8  | 18 | 20  | 17  | 18  | 13  | 8   | 17  |
| SFF1564 | 29 | 25 | 27 | 134 | 126 | 103 | 75  | 97  | 89  |
| SFF1565 | 20 | 13 | 10 | 20  | 16  | 18  | 24  | 27  | 30  |
| SFF1566 | 26 | 16 | 11 | 52  | 30  | 25  | 39  | 33  | 39  |
| SFF1567 | 19 | 14 | 16 | 45  | 52  | 30  | 61  | 59  | 57  |
| SFF1568 | 23 | 13 | 16 | 19  | 12  | 11  | 21  | 25  | 33  |



|         |    |    |    |      |      |      |     |     |     |
|---------|----|----|----|------|------|------|-----|-----|-----|
| SFF1569 | 20 | 21 | 30 | 80   | 75   | 55   | 45  | 74  | 68  |
| SFF1570 | 22 | 16 | 8  | 20   | 19   | 12   | 13  | 30  | 18  |
| SFF1572 | 28 | 24 | 25 | 132  | 131  | 97   | 53  | 79  | 49  |
| SFF1573 | 29 | 27 | 27 | 61   | 45   | 48   | 26  | 33  | 49  |
| SFF1575 | 13 | 16 | 11 | 46   | 49   | 27   | 30  | 33  | 42  |
| SFF1576 | 23 | 27 | 20 | 77   | 64   | 54   | 45  | 63  | 75  |
| SFF1578 | 30 | 22 | 24 | 35   | 14   | 29   | 20  | 34  | 39  |
| SFF1579 | 5  | 8  | 10 | 36   | 32   | 19   | 28  | 43  | 41  |
| SFF1580 | 15 | 15 | 10 | 44   | 35   | 32   | 33  | 41  | 47  |
| SFF1581 | 4  | 4  | 5  | 25   | 15   | 8    | 12  | 15  | 18  |
| SFF1582 | 0  | 0  | 1  | 3    | 5    | 4    | 7   | 7   | 10  |
| SFF1583 | 15 | 13 | 8  | 19   | 13   | 7    | 14  | 18  | 17  |
| SFF1584 | 41 | 29 | 19 | 27   | 16   | 30   | 32  | 35  | 35  |
| SFF1585 | 40 | 33 | 36 | 34   | 42   | 31   | 51  | 54  | 58  |
| SFF1586 | 32 | 20 | 18 | 22   | 19   | 18   | 28  | 42  | 36  |
| SFF1587 | 13 | 11 | 12 | 13   | 15   | 9    | 11  | 14  | 12  |
| SFF1588 | 8  | 7  | 5  | 8    | 9    | 14   | 10  | 15  | 19  |
| SFF1589 | 32 | 24 | 22 | 67   | 53   | 57   | 44  | 71  | 59  |
| SFF1590 | 30 | 50 | 32 | 40   | 47   | 44   | 31  | 36  | 50  |
| SFF1591 | 29 | 32 | 25 | 180  | 133  | 95   | 53  | 82  | 98  |
| SFF1593 | 16 | 30 | 18 | 104  | 93   | 64   | 64  | 61  | 56  |
| SFF1594 | 10 | 15 | 9  | 25   | 18   | 24   | 16  | 17  | 13  |
| SFF1595 | 13 | 9  | 14 | 95   | 93   | 75   | 43  | 75  | 56  |
| SFF1596 | 45 | 32 | 19 | 54   | 40   | 53   | 33  | 44  | 38  |
| SFF1597 | 46 | 49 | 29 | 54   | 52   | 53   | 34  | 31  | 34  |
| SFF1599 | 32 | 41 | 31 | 62   | 77   | 54   | 50  | 71  | 89  |
| SFF1600 | 13 | 18 | 14 | 40   | 33   | 29   | 45  | 53  | 34  |
| SFF1602 | 12 | 7  | 14 | 12   | 22   | 21   | 20  | 20  | 21  |
| SFF1603 | 6  | 8  | 1  | 24   | 42   | 21   | 25  | 32  | 34  |
| SFF1604 | 37 | 38 | 27 | 124  | 119  | 76   | 56  | 71  | 52  |
| SFF1606 | 6  | 2  | 1  | 9    | 1    | 4    | 19  | 17  | 20  |
| SFF1607 | 22 | 20 | 23 | 130  | 114  | 94   | 73  | 76  | 66  |
| SFF1608 | 12 | 14 | 11 | 17   | 14   | 14   | 14  | 19  | 16  |
| SFF1609 | 16 | 21 | 8  | 15   | 10   | 13   | 19  | 21  | 15  |
| SFF1610 | 6  | 14 | 11 | 13   | 15   | 13   | 17  | 14  | 17  |
| SFF1611 | 19 | 15 | 15 | 43   | 30   | 13   | 32  | 58  | 44  |
| SFF1612 | 9  | 4  | 9  | 10   | 8    | 7    | 11  | 13  | 11  |
| SFF1613 | 26 | 15 | 20 | 18   | 12   | 16   | 21  | 35  | 45  |
| SFF1614 | 13 | 7  | 12 | 92   | 87   | 53   | 64  | 79  | 78  |
| SFF1615 | 36 | 40 | 31 | 1233 | 1066 | 1008 | 645 | 811 | 707 |
| SFF1616 | 19 | 14 | 21 | 24   | 19   | 11   | 19  | 25  | 23  |

|         |    |    |    |     |     |     |     |     |     |
|---------|----|----|----|-----|-----|-----|-----|-----|-----|
| SFF1618 | 22 | 25 | 26 | 29  | 26  | 16  | 19  | 34  | 33  |
| SFF1619 | 9  | 20 | 18 | 132 | 143 | 98  | 44  | 66  | 52  |
| SFF1620 | 7  | 11 | 12 | 43  | 30  | 21  | 25  | 32  | 24  |
| SFF1621 | 34 | 27 | 30 | 436 | 343 | 313 | 204 | 257 | 202 |
| SFF1622 | 45 | 55 | 32 | 64  | 73  | 66  | 40  | 67  | 64  |
| SFF1623 | 11 | 17 | 11 | 27  | 21  | 23  | 18  | 29  | 24  |
| SFF1625 | 18 | 15 | 11 | 12  | 14  | 9   | 6   | 18  | 15  |
| SFF1626 | 14 | 11 | 12 | 26  | 16  | 25  | 29  | 16  | 15  |
| SFF1627 | 25 | 19 | 20 | 52  | 34  | 31  | 44  | 56  | 55  |
| SFF1628 | 16 | 22 | 19 | 19  | 13  | 20  | 19  | 32  | 18  |
| SFF1629 | 31 | 30 | 29 | 48  | 53  | 49  | 44  | 90  | 81  |
| SFF1630 | 15 | 10 | 13 | 30  | 29  | 21  | 16  | 21  | 26  |
| SFF1632 | 15 | 17 | 11 | 21  | 18  | 14  | 25  | 26  | 26  |
| SFF1634 | 29 | 31 | 20 | 51  | 30  | 36  | 21  | 31  | 39  |
| SFF1636 | 36 | 30 | 33 | 34  | 28  | 24  | 30  | 42  | 43  |
| SFF1637 | 68 | 59 | 47 | 56  | 72  | 41  | 63  | 87  | 80  |
| SFF1638 | 36 | 40 | 45 | 272 | 267 | 218 | 131 | 150 | 181 |
| SFF1639 | 18 | 17 | 7  | 17  | 14  | 18  | 17  | 19  | 26  |
| SFF1640 | 1  | 4  | 1  | 1   | 3   | 1   | 3   | 6   | 3   |
| SFF1641 | 18 | 11 | 9  | 29  | 25  | 21  | 22  | 30  | 28  |
| SFF1642 | 17 | 21 | 22 | 59  | 51  | 43  | 24  | 42  | 32  |
| SFF1643 | 21 | 25 | 20 | 22  | 22  | 30  | 22  | 41  | 35  |
| SFF1644 | 22 | 29 | 19 | 176 | 175 | 136 | 78  | 119 | 95  |
| SFF1645 | 12 | 17 | 12 | 37  | 31  | 25  | 21  | 28  | 27  |
| SFF1646 | 9  | 11 | 13 | 19  | 10  | 12  | 22  | 28  | 29  |
| SFF1647 | 17 | 17 | 11 | 42  | 28  | 32  | 17  | 23  | 21  |
| SFF1648 | 33 | 22 | 13 | 34  | 27  | 49  | 21  | 46  | 40  |
| SFF1650 | 12 | 11 | 15 | 28  | 27  | 23  | 24  | 27  | 19  |
| SFF1651 | 18 | 18 | 13 | 186 | 157 | 118 | 103 | 139 | 111 |
| SFF1652 | 7  | 8  | 1  | 16  | 11  | 17  | 16  | 15  | 15  |
| SFF1654 | 19 | 29 | 28 | 111 | 101 | 78  | 40  | 63  | 58  |
| SFF1655 | 12 | 6  | 6  | 19  | 16  | 23  | 11  | 14  | 14  |
| SFF1657 | 15 | 16 | 14 | 26  | 22  | 20  | 27  | 23  | 31  |
| SFF1658 | 12 | 9  | 12 | 21  | 18  | 23  | 27  | 32  | 22  |
| SFF1659 | 17 | 27 | 24 | 19  | 18  | 16  | 25  | 33  | 33  |
| SFF1661 | 30 | 32 | 34 | 46  | 35  | 33  | 41  | 43  | 49  |
| SFF1662 | 22 | 21 | 18 | 33  | 22  | 30  | 35  | 37  | 45  |
| SFF1663 | 16 | 19 | 21 | 30  | 29  | 28  | 38  | 35  | 34  |
| SFF1671 | 37 | 34 | 20 | 30  | 37  | 23  | 24  | 56  | 46  |
| SFF1672 | 25 | 22 | 23 | 24  | 29  | 33  | 25  | 36  | 30  |
| SFF1673 | 29 | 28 | 30 | 156 | 116 | 97  | 76  | 84  | 88  |

|         |    |    |    |     |     |     |     |     |     |
|---------|----|----|----|-----|-----|-----|-----|-----|-----|
| SFF1675 | 37 | 33 | 27 | 42  | 50  | 36  | 37  | 65  | 64  |
| SFF1676 | 21 | 21 | 9  | 49  | 52  | 29  | 19  | 26  | 23  |
| SFF1677 | 48 | 39 | 27 | 37  | 30  | 32  | 35  | 51  | 43  |
| SFF1678 | 25 | 18 | 21 | 44  | 66  | 51  | 31  | 38  | 31  |
| SFF1679 | 5  | 1  | 0  | 2   | 2   | 0   | 2   | 1   | 7   |
| SFF1680 | 19 | 27 | 21 | 29  | 20  | 23  | 27  | 36  | 29  |
| SFF1681 | 23 | 22 | 22 | 65  | 35  | 41  | 38  | 34  | 30  |
| SFF1682 | 28 | 34 | 25 | 45  | 37  | 27  | 25  | 37  | 35  |
| SFF1683 | 9  | 11 | 12 | 26  | 15  | 15  | 22  | 27  | 23  |
| SFF1684 | 7  | 9  | 9  | 57  | 52  | 42  | 50  | 72  | 69  |
| SFF1685 | 25 | 37 | 28 | 24  | 36  | 17  | 33  | 40  | 39  |
| SFF1686 | 27 | 30 | 20 | 18  | 14  | 20  | 32  | 47  | 48  |
| SFF1687 | 37 | 41 | 37 | 15  | 30  | 28  | 44  | 61  | 57  |
| SFF1688 | 10 | 6  | 9  | 85  | 96  | 74  | 59  | 81  | 53  |
| SFF1689 | 13 | 16 | 18 | 28  | 22  | 14  | 21  | 29  | 26  |
| SFF1690 | 7  | 9  | 10 | 19  | 25  | 15  | 21  | 18  | 23  |
| SFF1691 | 11 | 13 | 1  | 26  | 31  | 17  | 12  | 22  | 9   |
| SFF1692 | 44 | 52 | 45 | 45  | 53  | 54  | 46  | 36  | 55  |
| SFF1694 | 23 | 25 | 24 | 49  | 61  | 38  | 42  | 49  | 54  |
| SFF1696 | 9  | 11 | 11 | 132 | 139 | 125 | 79  | 100 | 88  |
| SFF1697 | 11 | 10 | 11 | 57  | 83  | 45  | 34  | 44  | 41  |
| SFF1698 | 19 | 17 | 25 | 87  | 68  | 61  | 54  | 54  | 64  |
| SFF1699 | 48 | 45 | 47 | 25  | 22  | 30  | 34  | 51  | 51  |
| SFF1701 | 10 | 14 | 10 | 32  | 33  | 19  | 15  | 18  | 23  |
| SFF1702 | 24 | 20 | 24 | 27  | 41  | 35  | 36  | 49  | 44  |
| SFF1703 | 22 | 26 | 20 | 140 | 119 | 84  | 95  | 99  | 102 |
| SFF1704 | 10 | 12 | 20 | 13  | 9   | 11  | 9   | 14  | 22  |
| SFF1705 | 4  | 5  | 9  | 4   | 3   | 3   | 1   | 13  | 13  |
| SFF1706 | 21 | 23 | 26 | 30  | 29  | 31  | 42  | 43  | 37  |
| SFF1707 | 24 | 28 | 21 | 39  | 24  | 28  | 31  | 40  | 38  |
| SFF1708 | 33 | 29 | 19 | 41  | 33  | 24  | 26  | 42  | 39  |
| SFF1710 | 8  | 6  | 12 | 115 | 120 | 91  | 49  | 62  | 58  |
| SFF1711 | 22 | 21 | 21 | 24  | 21  | 24  | 37  | 27  | 34  |
| SFF1712 | 17 | 18 | 22 | 53  | 49  | 37  | 30  | 39  | 31  |
| SFF1713 | 16 | 16 | 15 | 255 | 286 | 199 | 110 | 152 | 132 |
| SFF1714 | 18 | 21 | 11 | 34  | 33  | 23  | 29  | 43  | 49  |
| SFF1715 | 14 | 12 | 16 | 55  | 42  | 24  | 31  | 45  | 41  |
| SFF1716 | 25 | 31 | 15 | 177 | 141 | 76  | 113 | 138 | 109 |
| SFF1718 | 48 | 39 | 32 | 56  | 58  | 47  | 39  | 49  | 54  |
| SFF1719 | 8  | 8  | 10 | 15  | 13  | 17  | 7   | 15  | 16  |
| SFF1720 | 24 | 31 | 14 | 29  | 22  | 19  | 21  | 30  | 35  |

|         |    |    |    |     |     |     |     |     |     |
|---------|----|----|----|-----|-----|-----|-----|-----|-----|
| SFF1723 | 8  | 10 | 12 | 13  | 12  | 11  | 15  | 22  | 19  |
| SFF1724 | 9  | 4  | 5  | 17  | 12  | 14  | 10  | 12  | 14  |
| SFF1725 | 18 | 14 | 12 | 268 | 249 | 197 | 115 | 153 | 150 |
| SFF1726 | 5  | 5  | 5  | 49  | 41  | 39  | 13  | 29  | 23  |
| SFF1727 | 7  | 7  | 9  | 11  | 6   | 9   | 12  | 11  | 5   |
| SFF1728 | 56 | 43 | 44 | 25  | 33  | 22  | 37  | 52  | 66  |
| SFF1729 | 1  | 1  | 0  | 46  | 30  | 29  | 15  | 25  | 16  |
| SFF1730 | 23 | 30 | 20 | 22  | 31  | 21  | 24  | 39  | 25  |
| SFF1731 | 24 | 23 | 16 | 26  | 33  | 24  | 22  | 31  | 36  |
| SFF1732 | 10 | 6  | 14 | 50  | 52  | 43  | 25  | 31  | 15  |
| SFF1733 | 27 | 26 | 33 | 50  | 33  | 26  | 33  | 29  | 40  |
| SFF1734 | 11 | 8  | 7  | 22  | 21  | 16  | 37  | 54  | 55  |
| SFF1736 | 8  | 10 | 8  | 11  | 7   | 18  | 9   | 11  | 8   |
| SFF1737 | 10 | 26 | 19 | 38  | 19  | 32  | 15  | 33  | 30  |
| SFF1740 | 20 | 13 | 12 | 17  | 19  | 22  | 27  | 33  | 29  |
| SFF1741 | 10 | 3  | 8  | 33  | 18  | 16  | 31  | 39  | 25  |
| SFF1742 | 18 | 15 | 16 | 32  | 29  | 29  | 28  | 36  | 38  |
| SFF1743 | 20 | 24 | 7  | 40  | 19  | 26  | 41  | 47  | 46  |
| SFF1747 | 20 | 11 | 12 | 60  | 47  | 40  | 44  | 35  | 49  |
| SFF1748 | 10 | 20 | 17 | 6   | 10  | 12  | 19  | 22  | 30  |
| SFF1749 | 14 | 24 | 8  | 21  | 19  | 22  | 20  | 36  | 21  |
| SFF1750 | 9  | 2  | 2  | 10  | 12  | 6   | 9   | 14  | 8   |
| SFF1751 | 8  | 17 | 16 | 44  | 42  | 45  | 29  | 36  | 39  |
| SFF1752 | 19 | 12 | 12 | 25  | 21  | 18  | 21  | 28  | 15  |
| SFF1753 | 9  | 7  | 13 | 8   | 4   | 7   | 10  | 17  | 18  |
| SFF1754 | 10 | 13 | 18 | 13  | 15  | 10  | 20  | 25  | 18  |
| SFF1755 | 7  | 9  | 15 | 14  | 7   | 13  | 10  | 12  | 9   |
| SFF1756 | 5  | 3  | 4  | 5   | 7   | 6   | 8   | 10  | 4   |
| SFF1757 | 21 | 13 | 11 | 12  | 15  | 19  | 24  | 26  | 31  |
| SFF1758 | 7  | 13 | 15 | 42  | 34  | 23  | 29  | 40  | 33  |
| SFF1759 | 15 | 19 | 16 | 14  | 17  | 20  | 26  | 23  | 17  |
| SFF1760 | 26 | 25 | 29 | 39  | 42  | 33  | 33  | 50  | 44  |
| SFF1763 | 37 | 43 | 29 | 249 | 261 | 205 | 135 | 173 | 171 |
| SFF1764 | 14 | 21 | 12 | 12  | 12  | 18  | 16  | 25  | 22  |
| SFF1765 | 14 | 16 | 11 | 18  | 13  | 10  | 10  | 30  | 20  |
| SFF1766 | 10 | 20 | 20 | 27  | 28  | 19  | 33  | 56  | 51  |
| SFF1767 | 53 | 46 | 36 | 30  | 29  | 43  | 29  | 43  | 43  |
| SFF1768 | 16 | 32 | 16 | 28  | 38  | 23  | 34  | 36  | 55  |
| SFF1770 | 8  | 16 | 9  | 5   | 9   | 7   | 12  | 17  | 12  |
| SFF1772 | 19 | 24 | 24 | 30  | 34  | 23  | 25  | 49  | 28  |
| SFF1773 | 5  | 8  | 6  | 33  | 23  | 13  | 36  | 35  | 34  |

|         |    |    |    |     |     |     |     |     |     |
|---------|----|----|----|-----|-----|-----|-----|-----|-----|
| SFF1774 | 16 | 13 | 13 | 21  | 31  | 21  | 18  | 28  | 19  |
| SFF1777 | 38 | 44 | 34 | 43  | 39  | 32  | 36  | 50  | 47  |
| SFF1779 | 38 | 30 | 24 | 43  | 48  | 41  | 46  | 50  | 46  |
| SFF1785 | 26 | 25 | 25 | 263 | 234 | 177 | 102 | 127 | 100 |
| SFF1786 | 19 | 30 | 15 | 49  | 32  | 30  | 23  | 62  | 47  |
| SFF1787 | 19 | 20 | 21 | 16  | 14  | 16  | 23  | 32  | 31  |
| SFF1788 | 13 | 8  | 12 | 13  | 13  | 10  | 11  | 12  | 18  |
| SFF1789 | 25 | 25 | 26 | 85  | 67  | 66  | 26  | 42  | 33  |
| SFF1790 | 11 | 6  | 11 | 112 | 106 | 83  | 65  | 93  | 78  |
| SFF1792 | 0  | 4  | 10 | 11  | 10  | 9   | 9   | 11  | 8   |
| SFF1793 | 14 | 19 | 14 | 31  | 23  | 21  | 18  | 21  | 14  |
| SFF1794 | 13 | 15 | 16 | 12  | 21  | 16  | 17  | 14  | 13  |
| SFF1795 | 54 | 84 | 52 | 78  | 72  | 64  | 63  | 87  | 87  |
| SFF1796 | 26 | 25 | 18 | 91  | 68  | 43  | 46  | 62  | 53  |
| SFF1797 | 35 | 33 | 36 | 64  | 75  | 65  | 32  | 51  | 51  |
| SFF1798 | 13 | 21 | 18 | 31  | 27  | 19  | 16  | 23  | 28  |
| SFF1800 | 37 | 36 | 37 | 32  | 33  | 29  | 19  | 33  | 34  |
| SFF1801 | 22 | 23 | 17 | 19  | 13  | 15  | 16  | 22  | 18  |
| SFF1802 | 21 | 8  | 16 | 19  | 26  | 29  | 25  | 27  | 29  |
| SFF1803 | 4  | 5  | 11 | 29  | 31  | 16  | 21  | 45  | 28  |
| SFF1804 | 22 | 25 | 15 | 37  | 32  | 35  | 27  | 30  | 35  |
| SFF1805 | 22 | 10 | 23 | 33  | 31  | 34  | 30  | 44  | 47  |
| SFF1806 | 19 | 19 | 14 | 89  | 85  | 93  | 40  | 48  | 56  |
| SFF1807 | 25 | 30 | 23 | 39  | 28  | 25  | 33  | 31  | 34  |
| SFF1808 | 47 | 35 | 31 | 47  | 50  | 37  | 44  | 57  | 62  |
| SFF1809 | 8  | 12 | 12 | 78  | 58  | 50  | 25  | 36  | 32  |
| SFF1810 | 9  | 12 | 10 | 8   | 13  | 8   | 17  | 21  | 32  |
| SFF1811 | 19 | 19 | 14 | 66  | 61  | 49  | 20  | 29  | 24  |
| SFF1814 | 9  | 11 | 6  | 25  | 23  | 23  | 19  | 19  | 25  |
| SFF1816 | 17 | 16 | 20 | 37  | 37  | 34  | 20  | 30  | 33  |
| SFF1817 | 13 | 11 | 9  | 21  | 12  | 11  | 27  | 19  | 15  |
| SFF1818 | 40 | 48 | 41 | 34  | 25  | 33  | 41  | 40  | 35  |
| SFF1819 | 9  | 12 | 10 | 21  | 20  | 13  | 18  | 22  | 24  |
| SFF1820 | 13 | 17 | 13 | 11  | 13  | 8   | 23  | 23  | 28  |
| SFF1821 | 18 | 13 | 14 | 22  | 26  | 31  | 22  | 23  | 35  |
| SFF1822 | 8  | 5  | 3  | 9   | 4   | 7   | 5   | 13  | 14  |
| SFF1823 | 18 | 23 | 23 | 128 | 148 | 95  | 64  | 108 | 83  |
| SFF1825 | 43 | 44 | 52 | 42  | 24  | 30  | 36  | 46  | 55  |
| SFF1826 | 4  | 13 | 8  | 16  | 12  | 16  | 17  | 19  | 22  |
| SFF1829 | 28 | 11 | 27 | 31  | 23  | 19  | 21  | 32  | 27  |
| SFF1830 | 14 | 18 | 13 | 14  | 12  | 9   | 19  | 22  | 26  |

|         |    |    |    |     |     |     |     |     |     |
|---------|----|----|----|-----|-----|-----|-----|-----|-----|
| SFF1831 | 19 | 26 | 18 | 38  | 38  | 20  | 25  | 30  | 39  |
| SFF1832 | 23 | 32 | 24 | 62  | 41  | 45  | 44  | 46  | 54  |
| SFF1833 | 19 | 19 | 28 | 55  | 45  | 52  | 39  | 46  | 37  |
| SFF1834 | 21 | 30 | 18 | 146 | 140 | 110 | 82  | 96  | 76  |
| SFF1835 | 25 | 25 | 22 | 27  | 10  | 22  | 19  | 26  | 31  |
| SFF1836 | 23 | 22 | 27 | 14  | 15  | 11  | 19  | 20  | 11  |
| SFF1837 | 27 | 26 | 20 | 244 | 215 | 156 | 122 | 156 | 132 |
| SFF1838 | 25 | 27 | 11 | 30  | 33  | 22  | 28  | 30  | 45  |
| SFF1839 | 45 | 40 | 32 | 91  | 102 | 81  | 79  | 96  | 82  |
| SFF1840 | 19 | 13 | 11 | 50  | 47  | 43  | 21  | 24  | 20  |
| SFF1841 | 5  | 5  | 6  | 7   | 2   | 7   | 8   | 9   | 5   |
| SFF1842 | 19 | 17 | 16 | 26  | 39  | 26  | 10  | 44  | 38  |
| SFF1843 | 14 | 13 | 14 | 58  | 45  | 41  | 56  | 68  | 65  |
| SFF1844 | 15 | 18 | 12 | 151 | 195 | 124 | 99  | 136 | 118 |
| SFF1846 | 16 | 19 | 15 | 26  | 17  | 25  | 41  | 43  | 53  |
| SFF1847 | 32 | 15 | 18 | 133 | 127 | 96  | 50  | 84  | 65  |
| SFF1848 | 11 | 13 | 17 | 28  | 27  | 29  | 17  | 25  | 17  |
| SFF1850 | 5  | 6  | 1  | 1   | 5   | 9   | 6   | 10  | 6   |
| SFF1851 | 16 | 22 | 8  | 17  | 20  | 9   | 16  | 21  | 34  |
| SFF1852 | 21 | 11 | 15 | 18  | 21  | 13  | 20  | 14  | 27  |
| SFF1853 | 23 | 19 | 17 | 28  | 29  | 20  | 21  | 28  | 28  |
| SFF1854 | 33 | 12 | 14 | 53  | 38  | 56  | 49  | 70  | 68  |
| SFF1855 | 9  | 7  | 5  | 44  | 29  | 27  | 12  | 31  | 15  |
| SFF1857 | 31 | 23 | 29 | 42  | 31  | 26  | 32  | 36  | 59  |
| SFF1861 | 31 | 21 | 23 | 58  | 46  | 39  | 42  | 42  | 52  |
| SFF1863 | 11 | 15 | 13 | 18  | 22  | 27  | 18  | 31  | 36  |
| SFF1864 | 16 | 17 | 8  | 104 | 98  | 73  | 45  | 62  | 51  |
| SFF1865 | 61 | 59 | 46 | 37  | 34  | 38  | 29  | 45  | 51  |
| SFF1867 | 16 | 15 | 11 | 13  | 10  | 12  | 19  | 26  | 29  |
| SFF1869 | 14 | 15 | 17 | 41  | 32  | 35  | 25  | 31  | 44  |
| SFF1870 | 23 | 25 | 28 | 151 | 124 | 110 | 83  | 92  | 106 |
| SFF1871 | 58 | 52 | 57 | 42  | 47  | 46  | 42  | 53  | 39  |
| SFF1872 | 23 | 21 | 16 | 52  | 43  | 45  | 22  | 25  | 25  |
| SFF1873 | 18 | 29 | 18 | 16  | 23  | 11  | 15  | 27  | 31  |
| SFF1877 | 26 | 21 | 29 | 33  | 26  | 27  | 20  | 22  | 24  |
| SFF1878 | 19 | 25 | 14 | 111 | 89  | 62  | 51  | 54  | 81  |
| SFF1879 | 8  | 9  | 8  | 17  | 9   | 8   | 9   | 10  | 5   |
| SFF1880 | 13 | 14 | 7  | 19  | 15  | 12  | 14  | 19  | 25  |
| SFF1882 | 20 | 21 | 28 | 18  | 19  | 19  | 15  | 31  | 25  |
| SFF1883 | 31 | 20 | 26 | 107 | 122 | 83  | 54  | 62  | 84  |
| SFF1884 | 6  | 15 | 13 | 26  | 20  | 19  | 11  | 19  | 9   |

|         |    |    |    |     |     |     |    |     |     |
|---------|----|----|----|-----|-----|-----|----|-----|-----|
| SFF1886 | 56 | 58 | 62 | 54  | 50  | 45  | 50 | 81  | 73  |
| SFF1887 | 37 | 33 | 26 | 52  | 46  | 43  | 30 | 47  | 43  |
| SFF1888 | 17 | 21 | 26 | 29  | 20  | 18  | 31 | 26  | 32  |
| SFF1889 | 10 | 24 | 12 | 25  | 19  | 18  | 14 | 34  | 23  |
| SFF1890 | 9  | 14 | 5  | 27  | 16  | 22  | 18 | 34  | 20  |
| SFF1891 | 11 | 19 | 19 | 71  | 81  | 45  | 59 | 60  | 73  |
| SFF1892 | 5  | 7  | 7  | 31  | 18  | 17  | 10 | 16  | 8   |
| SFF1893 | 16 | 18 | 14 | 28  | 31  | 28  | 22 | 37  | 22  |
| SFF1894 | 42 | 37 | 30 | 66  | 63  | 63  | 50 | 56  | 53  |
| SFF1897 | 7  | 7  | 12 | 24  | 14  | 14  | 22 | 20  | 16  |
| SFF1898 | 12 | 12 | 10 | 12  | 11  | 16  | 25 | 29  | 20  |
| SFF1899 | 4  | 5  | 6  | 23  | 15  | 21  | 31 | 34  | 26  |
| SFF1900 | 22 | 21 | 19 | 14  | 14  | 13  | 22 | 14  | 24  |
| SFF1905 | 9  | 18 | 11 | 46  | 41  | 38  | 32 | 34  | 37  |
| SFF1906 | 29 | 20 | 20 | 36  | 44  | 39  | 42 | 57  | 53  |
| SFF1912 | 20 | 20 | 7  | 72  | 61  | 52  | 37 | 54  | 38  |
| SFF1914 | 7  | 4  | 3  | 15  | 16  | 11  | 7  | 12  | 16  |
| SFF1915 | 52 | 51 | 37 | 25  | 31  | 38  | 35 | 41  | 48  |
| SFF1916 | 33 | 40 | 27 | 44  | 46  | 35  | 46 | 39  | 47  |
| SFF1917 | 0  | 0  | 0  | 2   | 1   | 0   | 0  | 0   | 0   |
| SFF1918 | 44 | 42 | 34 | 168 | 153 | 119 | 84 | 117 | 116 |
| SFF1920 | 15 | 6  | 10 | 36  | 20  | 23  | 19 | 19  | 26  |
| SFF1922 | 26 | 30 | 27 | 46  | 41  | 41  | 40 | 51  | 46  |
| SFF1924 | 32 | 34 | 28 | 51  | 36  | 35  | 36 | 44  | 23  |
| SFF1925 | 8  | 10 | 4  | 15  | 19  | 16  | 14 | 23  | 25  |
| SFF1926 | 3  | 4  | 5  | 8   | 3   | 3   | 5  | 11  | 10  |
| SFF1927 | 4  | 5  | 2  | 7   | 8   | 4   | 9  | 14  | 9   |
| SFF1928 | 6  | 2  | 5  | 13  | 5   | 5   | 5  | 19  | 14  |
| SFF1929 | 3  | 1  | 5  | 4   | 5   | 4   | 7  | 9   | 11  |
| SFF1931 | 9  | 9  | 7  | 46  | 30  | 29  | 26 | 29  | 33  |
| SFF1932 | 12 | 22 | 30 | 42  | 42  | 29  | 34 | 39  | 41  |
| SFF1934 | 9  | 13 | 10 | 20  | 22  | 26  | 20 | 22  | 16  |
| SFF1935 | 20 | 31 | 17 | 26  | 29  | 29  | 24 | 39  | 43  |
| SFF1936 | 22 | 20 | 19 | 47  | 33  | 44  | 25 | 40  | 36  |
| SFF1937 | 15 | 14 | 16 | 12  | 15  | 21  | 20 | 19  | 17  |
| SFF1938 | 33 | 23 | 15 | 84  | 77  | 55  | 31 | 45  | 38  |
| SFF1939 | 11 | 6  | 10 | 36  | 37  | 20  | 24 | 34  | 42  |
| SFF1940 | 15 | 25 | 23 | 76  | 58  | 47  | 44 | 54  | 49  |
| SFF1942 | 7  | 6  | 7  | 39  | 48  | 36  | 10 | 19  | 11  |
| SFF1945 | 7  | 8  | 11 | 19  | 17  | 18  | 21 | 20  | 37  |
| SFF1946 | 17 | 14 | 8  | 16  | 14  | 7   | 17 | 14  | 14  |

|         |    |    |    |     |     |     |    |     |     |
|---------|----|----|----|-----|-----|-----|----|-----|-----|
| SFF1947 | 13 | 6  | 8  | 14  | 5   | 9   | 11 | 19  | 21  |
| SFF1948 | 12 | 4  | 8  | 32  | 38  | 38  | 25 | 32  | 23  |
| SFF1950 | 17 | 21 | 30 | 18  | 25  | 20  | 24 | 27  | 27  |
| SFF1951 | 3  | 8  | 3  | 4   | 3   | 6   | 5  | 2   | 7   |
| SFF1952 | 7  | 14 | 7  | 14  | 10  | 15  | 19 | 22  | 21  |
| SFF1953 | 31 | 13 | 24 | 20  | 29  | 26  | 22 | 23  | 39  |
| SFF1955 | 20 | 18 | 21 | 36  | 18  | 29  | 30 | 36  | 33  |
| SFF1960 | 24 | 17 | 14 | 36  | 33  | 28  | 22 | 31  | 33  |
| SFF1961 | 3  | 4  | 4  | 2   | 7   | 7   | 5  | 5   | 6   |
| SFF1962 | 29 | 30 | 19 | 20  | 25  | 21  | 23 | 22  | 30  |
| SFF1965 | 41 | 41 | 43 | 19  | 24  | 21  | 28 | 40  | 44  |
| SFF1966 | 16 | 8  | 6  | 21  | 22  | 15  | 16 | 19  | 16  |
| SFF1967 | 32 | 24 | 29 | 23  | 33  | 33  | 17 | 36  | 30  |
| SFF1972 | 24 | 24 | 32 | 67  | 47  | 52  | 45 | 38  | 51  |
| SFF1973 | 20 | 20 | 15 | 34  | 52  | 36  | 20 | 28  | 24  |
| SFF1974 | 44 | 46 | 46 | 54  | 59  | 44  | 69 | 65  | 79  |
| SFF1975 | 14 | 15 | 18 | 29  | 32  | 22  | 23 | 22  | 25  |
| SFF1977 | 21 | 22 | 13 | 29  | 20  | 27  | 14 | 24  | 26  |
| SFF1978 | 32 | 36 | 17 | 44  | 44  | 26  | 35 | 32  | 32  |
| SFF1979 | 14 | 15 | 10 | 64  | 48  | 37  | 27 | 37  | 39  |
| SFF1980 | 22 | 48 | 23 | 42  | 52  | 26  | 43 | 60  | 60  |
| SFF1981 | 16 | 21 | 18 | 28  | 19  | 26  | 24 | 36  | 38  |
| SFF1984 | 19 | 13 | 18 | 147 | 139 | 100 | 92 | 129 | 113 |
| SFF1985 | 24 | 14 | 17 | 20  | 18  | 11  | 25 | 29  | 29  |
| SFF1986 | 9  | 5  | 8  | 17  | 9   | 4   | 13 | 7   | 18  |
| SFF1988 | 16 | 13 | 16 | 20  | 27  | 27  | 21 | 36  | 31  |
| SFF1989 | 6  | 5  | 3  | 7   | 6   | 7   | 1  | 3   | 6   |
| SFF1990 | 17 | 15 | 9  | 29  | 46  | 40  | 29 | 38  | 38  |
| SFF1991 | 15 | 7  | 13 | 12  | 14  | 20  | 24 | 18  | 18  |
| SFF1992 | 17 | 18 | 11 | 90  | 82  | 63  | 43 | 58  | 43  |
| SFF1993 | 15 | 19 | 9  | 11  | 9   | 20  | 20 | 19  | 17  |
| SFF1994 | 4  | 3  | 8  | 10  | 8   | 12  | 6  | 11  | 7   |
| SFF1995 | 0  | 0  | 1  | 2   | 4   | 7   | 3  | 11  | 1   |
| SFF1996 | 16 | 12 | 30 | 17  | 22  | 26  | 20 | 31  | 35  |
| SFF1997 | 20 | 15 | 16 | 115 | 107 | 80  | 67 | 81  | 68  |
| SFF1998 | 9  | 17 | 16 | 40  | 37  | 41  | 17 | 33  | 29  |
| SFF1999 | 13 | 13 | 16 | 25  | 22  | 26  | 34 | 19  | 36  |
| SFF2000 | 15 | 17 | 18 | 129 | 137 | 109 | 78 | 83  | 82  |
| SFF2001 | 28 | 35 | 28 | 50  | 49  | 41  | 34 | 50  | 55  |
| SFF2002 | 19 | 16 | 12 | 11  | 11  | 15  | 18 | 15  | 21  |
| SFF2003 | 35 | 36 | 27 | 13  | 15  | 27  | 26 | 27  | 38  |



|            |    |    |    |     |     |     |     |     |     |
|------------|----|----|----|-----|-----|-----|-----|-----|-----|
| SFF2004    | 0  | 2  | 0  | 2   | 1   | 0   | 3   | 0   | 1   |
| SFF2005    | 16 | 14 | 20 | 133 | 107 | 93  | 67  | 80  | 80  |
| SFF2007    | 7  | 7  | 5  | 9   | 9   | 7   | 11  | 11  | 16  |
| SFF2010    | 11 | 13 | 16 | 21  | 17  | 13  | 19  | 27  | 11  |
| SFF2012    | 15 | 21 | 16 | 45  | 53  | 38  | 29  | 31  | 39  |
| SFF2013    | 23 | 17 | 24 | 27  | 39  | 23  | 31  | 24  | 23  |
| SFF2014    | 3  | 4  | 5  | 3   | 4   | 6   | 5   | 5   | 4   |
| SFF2015    | 13 | 16 | 11 | 51  | 56  | 33  | 35  | 30  | 38  |
| SFF2016    | 20 | 30 | 29 | 18  | 23  | 25  | 27  | 40  | 27  |
| SFF2017    | 12 | 8  | 10 | 61  | 53  | 45  | 32  | 47  | 33  |
| SFF2018    | 22 | 23 | 23 | 26  | 24  | 20  | 41  | 20  | 27  |
| SFF2023    | 18 | 24 | 16 | 104 | 101 | 83  | 45  | 55  | 61  |
| SFF2025    | 31 | 31 | 31 | 30  | 22  | 31  | 30  | 39  | 39  |
| SFF2026    | 13 | 22 | 14 | 19  | 23  | 14  | 15  | 21  | 20  |
| SFF2027    | 9  | 23 | 9  | 33  | 23  | 33  | 24  | 34  | 32  |
| SFF2030    | 52 | 54 | 58 | 43  | 37  | 39  | 45  | 68  | 89  |
| SFF2033    | 13 | 24 | 26 | 34  | 21  | 28  | 18  | 34  | 38  |
| SFF2034    | 16 | 16 | 11 | 24  | 15  | 17  | 13  | 23  | 29  |
| SFF2036    | 37 | 41 | 34 | 176 | 151 | 129 | 113 | 138 | 129 |
| SFF2037    | 9  | 1  | 5  | 11  | 13  | 14  | 5   | 10  | 7   |
| SFF2038    | 24 | 25 | 14 | 20  | 29  | 21  | 38  | 31  | 41  |
| SFF2039    | 10 | 16 | 19 | 25  | 25  | 19  | 18  | 23  | 24  |
| SFF2040    | 12 | 17 | 16 | 199 | 208 | 124 | 84  | 136 | 92  |
| SFF2042    | 11 | 13 | 10 | 6   | 7   | 5   | 12  | 27  | 32  |
| SFF2043    | 17 | 19 | 20 | 12  | 25  | 25  | 14  | 25  | 18  |
| SFF2044    | 20 | 28 | 18 | 33  | 32  | 26  | 22  | 26  | 41  |
| SFF2045    | 8  | 7  | 10 | 7   | 7   | 7   | 9   | 11  | 25  |
| SFF2046    | 34 | 29 | 17 | 135 | 129 | 83  | 71  | 72  | 68  |
| SFF2047    | 14 | 15 | 14 | 32  | 36  | 28  | 23  | 27  | 21  |
| SFF2048    | 1  | 2  | 3  | 2   | 3   | 3   | 2   | 1   | 4   |
| SFF2049    | 32 | 25 | 28 | 59  | 49  | 49  | 52  | 53  | 55  |
| SFF2050    | 6  | 5  | 6  | 9   | 6   | 7   | 13  | 9   | 7   |
| SFF2052    | 13 | 11 | 12 | 49  | 55  | 42  | 23  | 32  | 32  |
| SFF2053    | 9  | 18 | 9  | 123 | 115 | 94  | 45  | 65  | 59  |
| SFF2054    | 27 | 25 | 19 | 39  | 21  | 35  | 35  | 35  | 50  |
| SFF2055    | 8  | 12 | 11 | 14  | 6   | 17  | 7   | 14  | 15  |
| SFF2056    | 56 | 48 | 39 | 29  | 29  | 34  | 43  | 55  | 52  |
| SFF2058    | 1  | 3  | 4  | 8   | 8   | 11  | 8   | 7   | 13  |
| SMMPA00001 | 34 | 30 | 28 | 171 | 143 | 112 | 95  | 92  | 83  |
| SMMPA00002 | 24 | 31 | 32 | 772 | 730 | 542 | 263 | 362 | 323 |
| SMMPA00003 | 35 | 34 | 25 | 135 | 98  | 88  | 107 | 99  | 104 |

|            |    |    |    |     |     |     |     |     |     |
|------------|----|----|----|-----|-----|-----|-----|-----|-----|
| SMMPA00004 | 14 | 14 | 16 | 355 | 320 | 260 | 174 | 233 | 186 |
| SMMPA00005 | 34 | 21 | 17 | 31  | 40  | 30  | 17  | 24  | 11  |
| SMMPA00006 | 21 | 17 | 17 | 75  | 65  | 56  | 32  | 37  | 47  |
| SMMPA00007 | 9  | 6  | 10 | 16  | 9   | 9   | 9   | 7   | 12  |
| SMMPA00008 | 24 | 19 | 25 | 208 | 200 | 153 | 107 | 148 | 114 |
| SMMPA00009 | 9  | 7  | 11 | 18  | 15  | 17  | 12  | 23  | 26  |
| SMMPA00010 | 1  | 5  | 4  | 4   | 3   | 6   | 8   | 6   | 5   |
| SMMPA00011 | 2  | 10 | 7  | 31  | 31  | 22  | 11  | 27  | 26  |
| SMMPA00012 | 29 | 28 | 28 | 38  | 32  | 32  | 24  | 32  | 37  |
| SMMPA00013 | 24 | 23 | 18 | 29  | 38  | 26  | 23  | 22  | 20  |
| SMMPA00014 | 6  | 11 | 6  | 9   | 10  | 9   | 14  | 18  | 7   |
| SMMPA00015 | 24 | 35 | 40 | 144 | 106 | 101 | 66  | 57  | 49  |
| SMMPA00016 | 19 | 13 | 10 | 220 | 194 | 146 | 52  | 86  | 60  |
| SMMPA00017 | 28 | 37 | 41 | 60  | 64  | 56  | 34  | 40  | 52  |
| SMMPA00018 | 10 | 9  | 15 | 46  | 45  | 34  | 19  | 25  | 24  |
| SMMPA00019 | 5  | 7  | 7  | 6   | 7   | 2   | 11  | 7   | 6   |
| SMMPA00020 | 9  | 7  | 7  | 419 | 385 | 350 | 222 | 311 | 247 |
| SMMPA00021 | 22 | 15 | 16 | 56  | 54  | 43  | 31  | 40  | 42  |
| SMMPA00022 | 7  | 8  | 13 | 19  | 20  | 18  | 12  | 21  | 29  |
| SMMPA00023 | 26 | 23 | 30 | 161 | 146 | 98  | 62  | 76  | 62  |
| SMMPA00024 | 26 | 19 | 9  | 117 | 113 | 70  | 48  | 71  | 73  |
| SMMPA00025 | 18 | 14 | 16 | 512 | 452 | 397 | 277 | 324 | 317 |
| SMMPA00026 | 33 | 28 | 32 | 67  | 61  | 68  | 32  | 51  | 40  |
| SMMPA00027 | 7  | 11 | 12 | 16  | 12  | 19  | 19  | 22  | 15  |
| SMMPA00028 | 13 | 6  | 10 | 20  | 16  | 9   | 9   | 11  | 12  |
| SMMPA00029 | 21 | 23 | 23 | 306 | 233 | 171 | 96  | 150 | 118 |
| SMMPA00030 | 4  | 10 | 4  | 14  | 4   | 6   | 4   | 8   | 10  |
| SMMPA00031 | 9  | 9  | 3  | 19  | 21  | 11  | 19  | 16  | 16  |
| SMMPA00032 | 4  | 7  | 6  | 5   | 7   | 5   | 8   | 14  | 10  |
| SMMPA00033 | 13 | 14 | 7  | 55  | 56  | 36  | 26  | 33  | 29  |
| SMMPA00034 | 17 | 18 | 18 | 22  | 29  | 28  | 20  | 26  | 32  |
| SMMPA00035 | 11 | 20 | 12 | 27  | 26  | 20  | 24  | 21  | 29  |
| SMMPA00036 | 8  | 13 | 15 | 19  | 18  | 17  | 16  | 17  | 20  |
| SMMPA00037 | 33 | 17 | 21 | 21  | 29  | 33  | 39  | 50  | 38  |
| SMMPA00038 | 14 | 12 | 8  | 175 | 189 | 150 | 90  | 95  | 95  |
| SMMPA00039 | 2  | 5  | 7  | 29  | 34  | 26  | 32  | 26  | 30  |
| SMMPA00040 | 15 | 7  | 13 | 91  | 77  | 55  | 39  | 42  | 38  |
| SMMPA00041 | 12 | 19 | 18 | 22  | 29  | 27  | 28  | 26  | 24  |
| SMMPA00042 | 9  | 11 | 7  | 22  | 16  | 17  | 14  | 27  | 16  |
| SMMPA00043 | 9  | 19 | 12 | 77  | 68  | 46  | 38  | 64  | 48  |
| SMMPA00044 | 22 | 12 | 18 | 189 | 205 | 131 | 74  | 116 | 97  |

|            |    |    |    |     |     |     |     |     |     |
|------------|----|----|----|-----|-----|-----|-----|-----|-----|
| SMMPA00045 | 7  | 11 | 12 | 308 | 310 | 292 | 135 | 181 | 154 |
| SMMPA00046 | 45 | 46 | 28 | 49  | 58  | 45  | 37  | 34  | 40  |
| SMMPA00047 | 10 | 12 | 8  | 15  | 26  | 11  | 10  | 16  | 14  |
| SMMPA00048 | 13 | 7  | 6  | 11  | 12  | 12  | 13  | 20  | 12  |
| SMMPA00049 | 27 | 25 | 26 | 59  | 53  | 46  | 36  | 44  | 39  |
| SMMPA00050 | 14 | 24 | 11 | 32  | 24  | 17  | 22  | 26  | 23  |
| SMMPA00051 | 24 | 23 | 23 | 67  | 71  | 78  | 39  | 58  | 52  |
| SMMPA00052 | 19 | 21 | 12 | 57  | 53  | 40  | 21  | 28  | 24  |
| SMMPA00053 | 18 | 23 | 15 | 146 | 150 | 89  | 54  | 71  | 70  |
| SMMPA00054 | 13 | 24 | 15 | 26  | 17  | 18  | 16  | 20  | 20  |
| SMMPA00055 | 12 | 17 | 9  | 110 | 99  | 68  | 55  | 45  | 54  |
| SMMPA00056 | 29 | 26 | 38 | 98  | 83  | 59  | 59  | 63  | 56  |
| SMMPA00057 | 9  | 8  | 6  | 167 | 125 | 103 | 71  | 74  | 56  |
| SMMPA00058 | 16 | 23 | 14 | 211 | 213 | 159 | 97  | 107 | 104 |
| SMMPA00059 | 9  | 9  | 10 | 4   | 6   | 9   | 8   | 17  | 6   |
| SMMPA00060 | 24 | 22 | 18 | 83  | 66  | 66  | 25  | 35  | 20  |
| SMMPA00061 | 24 | 23 | 23 | 16  | 25  | 24  | 24  | 25  | 27  |
| SMMPA00062 | 14 | 17 | 19 | 25  | 17  | 17  | 8   | 15  | 12  |
| SMMPA00063 | 15 | 17 | 14 | 44  | 39  | 49  | 19  | 38  | 34  |
| SMMPA00064 | 7  | 11 | 8  | 27  | 27  | 22  | 11  | 16  | 9   |
| SMMPA00065 | 18 | 24 | 22 | 12  | 10  | 16  | 17  | 18  | 27  |
| SMMPA00066 | 17 | 18 | 14 | 31  | 23  | 22  | 25  | 28  | 33  |
| SMMPA00067 | 8  | 5  | 6  | 17  | 17  | 7   | 9   | 17  | 13  |
| SMMPA00068 | 12 | 9  | 12 | 4   | 11  | 5   | 10  | 11  | 24  |
| SMMPA00069 | 5  | 3  | 3  | 109 | 115 | 113 | 45  | 67  | 40  |
| SMMPA00070 | 2  | 5  | 5  | 9   | 6   | 9   | 7   | 12  | 4   |
| SMMPA00071 | 13 | 17 | 11 | 384 | 318 | 272 | 105 | 147 | 126 |
| SMMPA00072 | 8  | 10 | 10 | 103 | 114 | 80  | 55  | 61  | 56  |
| SMMPA00073 | 18 | 10 | 16 | 88  | 66  | 77  | 46  | 66  | 60  |
| SMMPA00074 | 24 | 23 | 24 | 341 | 272 | 229 | 106 | 199 | 156 |
| SMMPA00075 | 2  | 1  | 1  | 22  | 18  | 28  | 12  | 11  | 19  |
| SMMPA00076 | 20 | 5  | 10 | 72  | 66  | 54  | 42  | 31  | 38  |
| SMMPA00077 | 20 | 19 | 10 | 31  | 22  | 21  | 29  | 29  | 37  |
| SMMPA00078 | 16 | 13 | 27 | 28  | 27  | 23  | 23  | 30  | 20  |
| SMMPA00079 | 10 | 7  | 7  | 8   | 10  | 8   | 5   | 13  | 17  |
| SMMPA00080 | 30 | 35 | 31 | 78  | 82  | 53  | 48  | 64  | 58  |
| SMMPA00081 | 29 | 16 | 11 | 45  | 41  | 38  | 19  | 37  | 38  |
| SMMPA00082 | 19 | 10 | 22 | 114 | 100 | 83  | 50  | 65  | 61  |
| SMMPA00083 | 12 | 9  | 11 | 33  | 29  | 21  | 17  | 15  | 17  |
| SMMPA00084 | 17 | 11 | 14 | 66  | 67  | 41  | 45  | 58  | 52  |
| SMMPA00085 | 24 | 25 | 33 | 47  | 72  | 44  | 30  | 59  | 49  |

|            |    |    |    |     |     |     |     |     |     |
|------------|----|----|----|-----|-----|-----|-----|-----|-----|
| SMMPA00086 | 15 | 24 | 16 | 30  | 30  | 35  | 17  | 18  | 27  |
| SMMPA00087 | 11 | 12 | 11 | 10  | 8   | 8   | 7   | 19  | 13  |
| SMMPA00088 | 14 | 21 | 19 | 567 | 515 | 446 | 210 | 298 | 250 |
| SMMPA00089 | 17 | 14 | 15 | 20  | 29  | 26  | 18  | 22  | 22  |
| SMMPA00090 | 11 | 5  | 12 | 26  | 14  | 19  | 18  | 16  | 19  |
| SMMPA00091 | 13 | 11 | 14 | 23  | 18  | 18  | 13  | 17  | 22  |
| SMMPA00092 | 26 | 21 | 25 | 69  | 73  | 56  | 53  | 62  | 54  |
| SMMPA00093 | 4  | 7  | 3  | 7   | 5   | 2   | 3   | 6   | 5   |
| SMMPA00094 | 28 | 25 | 30 | 479 | 401 | 331 | 195 | 272 | 271 |
| SMMPA00095 | 4  | 10 | 12 | 20  | 18  | 19  | 9   | 24  | 16  |
| SMMPA00096 | 11 | 2  | 5  | 16  | 19  | 14  | 10  | 17  | 14  |
| SMMPA00097 | 19 | 27 | 27 | 921 | 936 | 840 | 519 | 788 | 760 |
| SMMPA00098 | 6  | 6  | 4  | 6   | 5   | 4   | 8   | 12  | 10  |
| SMMPA00099 | 12 | 9  | 14 | 9   | 11  | 13  | 12  | 10  | 23  |
| SMMPA00100 | 9  | 13 | 12 | 42  | 25  | 28  | 28  | 39  | 27  |
| SMMPA00101 | 7  | 9  | 4  | 20  | 8   | 10  | 12  | 14  | 22  |
| SMMPA00102 | 31 | 35 | 25 | 97  | 73  | 71  | 49  | 71  | 66  |
| SMMPA00103 | 9  | 10 | 5  | 13  | 18  | 19  | 10  | 15  | 14  |
| SMMPA00104 | 7  | 4  | 1  | 7   | 3   | 8   | 8   | 8   | 17  |
| SMMPA00105 | 12 | 15 | 7  | 13  | 12  | 13  | 12  | 12  | 15  |
| SMMPA00106 | 23 | 29 | 19 | 114 | 81  | 77  | 43  | 60  | 62  |
| SMMPA00107 | 4  | 6  | 8  | 6   | 6   | 7   | 10  | 6   | 15  |
| SMMPA00108 | 7  | 18 | 10 | 21  | 30  | 19  | 24  | 25  | 24  |
| SMMPA00109 | 3  | 3  | 2  | 1   | 1   | 1   | 3   | 4   | 1   |
| SMMPA00110 | 15 | 17 | 12 | 14  | 14  | 17  | 10  | 29  | 23  |
| SMMPA00111 | 14 | 6  | 6  | 52  | 47  | 50  | 43  | 62  | 56  |
| SMMPA00112 | 32 | 29 | 31 | 78  | 61  | 52  | 37  | 70  | 63  |
| SMMPA00113 | 11 | 15 | 19 | 77  | 75  | 53  | 40  | 40  | 57  |
| SMMPA00114 | 35 | 28 | 30 | 82  | 96  | 58  | 35  | 67  | 49  |
| SMMPA00115 | 10 | 10 | 8  | 10  | 22  | 11  | 9   | 12  | 15  |
| SMMPA00116 | 17 | 20 | 16 | 23  | 23  | 29  | 15  | 22  | 17  |
| SMMPA00117 | 16 | 8  | 2  | 46  | 38  | 37  | 22  | 18  | 16  |
| SMMPA00118 | 29 | 21 | 26 | 43  | 34  | 37  | 29  | 45  | 36  |
| SMMPA00119 | 10 | 8  | 4  | 19  | 9   | 10  | 8   | 15  | 17  |
| SMMPA00120 | 14 | 11 | 18 | 24  | 27  | 24  | 21  | 24  | 12  |
| SMMPA00121 | 32 | 27 | 22 | 763 | 755 | 631 | 294 | 376 | 322 |
| SMMPA00122 | 10 | 4  | 5  | 28  | 23  | 23  | 14  | 21  | 18  |
| SMMPA00123 | 9  | 10 | 4  | 41  | 35  | 36  | 13  | 21  | 20  |
| SMMPA00124 | 13 | 19 | 14 | 27  | 29  | 29  | 23  | 37  | 31  |
| SMMPA00125 | 7  | 11 | 10 | 11  | 13  | 8   | 15  | 12  | 24  |
| SMMPA00126 | 11 | 14 | 13 | 22  | 10  | 10  | 7   | 12  | 15  |

|            |     |     |     |     |     |     |     |     |     |
|------------|-----|-----|-----|-----|-----|-----|-----|-----|-----|
| SMMPA00127 | 24  | 18  | 23  | 38  | 21  | 28  | 31  | 33  | 37  |
| SMMPA00128 | 2   | 8   | 4   | 11  | 4   | 9   | 10  | 15  | 10  |
| SMMPA00129 | 34  | 27  | 18  | 83  | 74  | 39  | 45  | 59  | 59  |
| SMMPA00130 | 14  | 11  | 9   | 12  | 6   | 9   | 12  | 10  | 14  |
| SMMPA00131 | 8   | 11  | 10  | 32  | 21  | 20  | 21  | 13  | 22  |
| SMMPA00132 | 21  | 17  | 24  | 27  | 33  | 33  | 24  | 45  | 35  |
| SMMPA00133 | 18  | 5   | 12  | 60  | 58  | 45  | 28  | 50  | 38  |
| SMMPA00134 | 35  | 27  | 32  | 42  | 36  | 48  | 39  | 44  | 43  |
| SMMPA00135 | 14  | 8   | 7   | 231 | 209 | 191 | 98  | 120 | 94  |
| SMMPA00136 | 4   | 4   | 4   | 1   | 6   | 2   | 1   | 7   | 9   |
| SMMPA00137 | 17  | 13  | 9   | 12  | 18  | 20  | 20  | 24  | 24  |
| SMMPA00138 | 17  | 6   | 6   | 84  | 81  | 89  | 33  | 44  | 40  |
| SMMPA00139 | 13  | 10  | 7   | 12  | 12  | 7   | 13  | 13  | 11  |
| SMMPA00140 | 28  | 16  | 14  | 39  | 49  | 38  | 27  | 36  | 31  |
| SMMPA00141 | 15  | 15  | 30  | 63  | 78  | 58  | 31  | 54  | 41  |
| SMMPA00142 | 23  | 15  | 23  | 24  | 26  | 28  | 26  | 41  | 34  |
| SMMPA00143 | 17  | 17  | 16  | 102 | 78  | 74  | 38  | 44  | 42  |
| SMMPA00144 | 31  | 34  | 23  | 109 | 97  | 68  | 48  | 60  | 82  |
| SMMPA00145 | 4   | 6   | 8   | 30  | 28  | 20  | 15  | 18  | 14  |
| SMMPA00146 | 19  | 21  | 17  | 30  | 15  | 13  | 20  | 16  | 25  |
| SMMPA00147 | 14  | 11  | 22  | 174 | 120 | 106 | 54  | 67  | 69  |
| SMMPA00148 | 9   | 11  | 11  | 31  | 25  | 23  | 19  | 22  | 22  |
| SMMPA00149 | 24  | 20  | 18  | 139 | 123 | 89  | 57  | 71  | 79  |
| SMMPA00150 | 18  | 14  | 20  | 216 | 210 | 174 | 66  | 73  | 54  |
| SMMPA00151 | 35  | 22  | 19  | 27  | 31  | 28  | 23  | 28  | 30  |
| SMMPA00152 | 12  | 14  | 8   | 18  | 18  | 16  | 20  | 23  | 28  |
| SMMPA00153 | 25  | 38  | 30  | 72  | 64  | 72  | 49  | 40  | 65  |
| SMMPA00154 | 47  | 42  | 41  | 133 | 139 | 106 | 74  | 61  | 72  |
| SMMPA00155 | 17  | 19  | 21  | 21  | 23  | 28  | 23  | 45  | 38  |
| SMMPA00156 | 21  | 19  | 14  | 118 | 80  | 72  | 48  | 50  | 57  |
| SMMPA00157 | 19  | 24  | 18  | 21  | 33  | 14  | 22  | 25  | 32  |
| SMMPA00158 | 13  | 9   | 10  | 51  | 45  | 34  | 21  | 22  | 30  |
| SMMPA00159 | 48  | 41  | 26  | 79  | 81  | 66  | 44  | 78  | 57  |
| SMMPA00160 | 26  | 30  | 27  | 28  | 34  | 28  | 23  | 33  | 32  |
| SMMPA00161 | 16  | 20  | 24  | 186 | 166 | 151 | 94  | 103 | 98  |
| SMMPA00162 | 9   | 8   | 10  | 301 | 264 | 273 | 187 | 211 | 191 |
| SMMPA00163 | 8   | 3   | 1   | 37  | 16  | 21  | 14  | 30  | 26  |
| SMMPA00164 | 2   | 8   | 5   | 76  | 74  | 66  | 42  | 40  | 51  |
| SMMPA00165 | 7   | 5   | 5   | 28  | 39  | 28  | 15  | 17  | 11  |
| SMMPA00166 | 29  | 24  | 21  | 40  | 36  | 38  | 40  | 53  | 41  |
| SMMPA00167 | 113 | 119 | 100 | 58  | 52  | 53  | 92  | 86  | 87  |

|            |    |    |    |     |     |     |     |     |    |
|------------|----|----|----|-----|-----|-----|-----|-----|----|
| SMMPA00168 | 21 | 13 | 16 | 46  | 48  | 31  | 24  | 26  | 26 |
| SMMPA00169 | 23 | 19 | 14 | 60  | 52  | 40  | 25  | 30  | 34 |
| SMMPA00170 | 15 | 8  | 9  | 80  | 94  | 66  | 28  | 48  | 48 |
| SMMPA00171 | 9  | 9  | 13 | 10  | 18  | 18  | 7   | 12  | 11 |
| SMMPA00172 | 13 | 20 | 16 | 72  | 47  | 49  | 21  | 25  | 26 |
| SMMPA00173 | 6  | 4  | 2  | 9   | 7   | 3   | 9   | 13  | 13 |
| SMMPA00174 | 14 | 12 | 13 | 10  | 16  | 16  | 9   | 20  | 21 |
| SMMPA00175 | 16 | 19 | 18 | 21  | 32  | 32  | 25  | 25  | 37 |
| SMMPA00176 | 5  | 10 | 13 | 42  | 40  | 43  | 17  | 24  | 30 |
| SMMPA00177 | 14 | 20 | 15 | 69  | 54  | 48  | 28  | 42  | 36 |
| SMMPA00178 | 6  | 8  | 13 | 6   | 10  | 10  | 6   | 14  | 12 |
| SMMPA00179 | 18 | 13 | 9  | 37  | 28  | 25  | 18  | 18  | 17 |
| SMMPA00180 | 11 | 9  | 12 | 14  | 13  | 14  | 16  | 23  | 21 |
| SMMPA00181 | 26 | 30 | 21 | 49  | 29  | 25  | 37  | 42  | 34 |
| SMMPA00182 | 13 | 9  | 7  | 35  | 36  | 16  | 13  | 13  | 27 |
| SMMPA00183 | 3  | 2  | 0  | 15  | 4   | 14  | 7   | 4   | 8  |
| SMMPA00184 | 42 | 32 | 27 | 135 | 127 | 104 | 67  | 54  | 47 |
| SMMPA00185 | 8  | 7  | 9  | 43  | 40  | 36  | 33  | 47  | 33 |
| SMMPA00186 | 14 | 14 | 13 | 21  | 20  | 17  | 13  | 25  | 15 |
| SMMPA00187 | 19 | 13 | 18 | 63  | 68  | 48  | 32  | 39  | 38 |
| SMMPA00188 | 12 | 19 | 10 | 25  | 23  | 18  | 30  | 35  | 33 |
| SMMPA00189 | 31 | 14 | 18 | 27  | 37  | 35  | 34  | 24  | 48 |
| SMMPA00190 | 5  | 8  | 6  | 24  | 12  | 13  | 10  | 20  | 13 |
| SMMPA00191 | 13 | 14 | 16 | 45  | 33  | 34  | 45  | 43  | 39 |
| SMMPA00192 | 22 | 14 | 12 | 186 | 170 | 122 | 103 | 121 | 93 |
| SMMPA00193 | 16 | 21 | 15 | 21  | 16  | 22  | 19  | 35  | 26 |
| SMMPA00194 | 8  | 10 | 10 | 33  | 47  | 35  | 20  | 25  | 22 |
| SMMPA00195 | 9  | 11 | 9  | 25  | 12  | 26  | 11  | 13  | 12 |
| SMMPA00196 | 36 | 30 | 42 | 61  | 47  | 43  | 40  | 52  | 51 |
| SMMPA00197 | 17 | 19 | 19 | 68  | 74  | 75  | 41  | 45  | 41 |
| SMMPA00198 | 11 | 14 | 17 | 51  | 46  | 42  | 33  | 26  | 39 |
| SMMPA00199 | 27 | 25 | 27 | 34  | 42  | 33  | 22  | 29  | 24 |
| SMMPA00200 | 14 | 14 | 5  | 14  | 23  | 8   | 7   | 16  | 16 |
| SMMPA00201 | 4  | 3  | 9  | 6   | 5   | 3   | 5   | 8   | 15 |
| SMMPA00202 | 24 | 33 | 37 | 138 | 116 | 87  | 54  | 79  | 69 |
| SMMPA00203 | 12 | 17 | 10 | 57  | 44  | 50  | 23  | 26  | 34 |
| SMMPA00204 | 3  | 5  | 5  | 2   | 4   | 5   | 11  | 6   | 11 |
| SMMPA00205 | 9  | 15 | 8  | 130 | 101 | 96  | 70  | 79  | 78 |
| SMMPA00206 | 5  | 14 | 10 | 158 | 159 | 114 | 53  | 62  | 61 |
| SMMPA00207 | 9  | 17 | 6  | 91  | 75  | 61  | 48  | 56  | 43 |
| SMMPA00208 | 32 | 36 | 31 | 96  | 120 | 70  | 63  | 66  | 61 |

|            |    |    |    |     |     |     |     |     |     |
|------------|----|----|----|-----|-----|-----|-----|-----|-----|
| SMMPA00209 | 7  | 18 | 16 | 12  | 19  | 19  | 8   | 21  | 23  |
| SMMPA00210 | 21 | 22 | 14 | 37  | 36  | 39  | 28  | 27  | 22  |
| SMMPA00211 | 9  | 8  | 9  | 43  | 44  | 30  | 32  | 30  | 29  |
| SMMPA00212 | 28 | 28 | 22 | 312 | 312 | 218 | 125 | 160 | 139 |
| SMMPA00213 | 8  | 16 | 16 | 20  | 24  | 25  | 12  | 24  | 26  |
| SMMPA00214 | 8  | 9  | 11 | 7   | 10  | 11  | 10  | 12  | 10  |
| SMMPA00215 | 5  | 3  | 0  | 10  | 8   | 5   | 4   | 9   | 7   |
| SMMPA00216 | 9  | 14 | 22 | 19  | 24  | 27  | 17  | 17  | 16  |
| SMMPA00217 | 1  | 2  | 1  | 3   | 2   | 2   | 1   | 3   | 0   |
| SMMPA00218 | 18 | 23 | 11 | 244 | 242 | 181 | 116 | 153 | 141 |
| SMMPA00219 | 20 | 14 | 17 | 27  | 23  | 22  | 17  | 30  | 21  |
| SMMPA00220 | 16 | 15 | 16 | 20  | 21  | 19  | 13  | 29  | 33  |
| SMMPA00221 | 2  | 3  | 6  | 0   | 1   | 1   | 4   | 4   | 2   |
| SMMPA00222 | 19 | 14 | 15 | 31  | 20  | 22  | 22  | 29  | 20  |
| SMMPA00223 | 26 | 25 | 14 | 27  | 28  | 28  | 20  | 37  | 34  |
| SMMPA00224 | 14 | 11 | 11 | 17  | 10  | 6   | 9   | 15  | 11  |
| SMMPA00225 | 17 | 15 | 13 | 243 | 211 | 171 | 122 | 130 | 109 |
| SMMPA00226 | 22 | 19 | 30 | 443 | 414 | 366 | 171 | 232 | 216 |
| SMMPA00227 | 19 | 18 | 25 | 45  | 39  | 31  | 43  | 35  | 47  |
| SMMPA00228 | 6  | 7  | 8  | 19  | 8   | 6   | 7   | 18  | 18  |
| SMMPA00229 | 5  | 3  | 2  | 7   | 6   | 7   | 2   | 9   | 6   |
| SMMPA00230 | 23 | 24 | 12 | 92  | 74  | 48  | 33  | 50  | 36  |
| SMMPA00231 | 21 | 16 | 8  | 28  | 18  | 22  | 18  | 19  | 21  |
| SMMPA00232 | 23 | 23 | 20 | 82  | 97  | 85  | 55  | 67  | 55  |
| SMMPA00233 | 15 | 18 | 12 | 28  | 23  | 26  | 25  | 32  | 27  |
| SMMPA00234 | 23 | 20 | 15 | 58  | 34  | 35  | 25  | 36  | 37  |
| SMMPA00235 | 16 | 24 | 18 | 53  | 47  | 45  | 24  | 29  | 54  |
| SMMPA00236 | 9  | 10 | 6  | 36  | 25  | 26  | 25  | 42  | 41  |
| SMMPA00237 | 14 | 9  | 2  | 11  | 8   | 6   | 10  | 11  | 14  |
| SMMPA00238 | 14 | 16 | 7  | 14  | 15  | 9   | 13  | 10  | 12  |
| SMMPA00239 | 14 | 13 | 9  | 9   | 12  | 19  | 23  | 21  | 19  |
| SMMPA00240 | 21 | 24 | 16 | 33  | 23  | 23  | 20  | 26  | 36  |
| SMMPA00241 | 16 | 17 | 16 | 23  | 23  | 17  | 23  | 26  | 21  |
| SMMPA00242 | 14 | 14 | 19 | 152 | 151 | 130 | 77  | 108 | 85  |
| SMMPA00243 | 9  | 7  | 12 | 20  | 18  | 20  | 24  | 22  | 18  |
| SMMPA00244 | 19 | 20 | 22 | 259 | 226 | 198 | 98  | 139 | 97  |
| SMMPA00245 | 6  | 5  | 3  | 8   | 9   | 12  | 3   | 14  | 5   |
| SMMPA00246 | 15 | 14 | 14 | 13  | 17  | 17  | 14  | 19  | 13  |
| SMMPA00247 | 11 | 15 | 16 | 18  | 20  | 22  | 17  | 33  | 15  |
| SMMPA00248 | 18 | 28 | 19 | 186 | 158 | 129 | 105 | 113 | 117 |
| SMMPA00249 | 38 | 47 | 32 | 41  | 36  | 41  | 51  | 41  | 46  |

|            |    |    |    |     |     |     |     |     |     |
|------------|----|----|----|-----|-----|-----|-----|-----|-----|
| SMMPA00250 | 13 | 10 | 8  | 8   | 5   | 7   | 14  | 17  | 17  |
| SMMPA00251 | 29 | 25 | 25 | 587 | 543 | 416 | 196 | 276 | 266 |
| SMMPA00252 | 24 | 41 | 18 | 40  | 35  | 36  | 36  | 33  | 27  |
| SMMPA00253 | 6  | 6  | 8  | 8   | 8   | 10  | 9   | 13  | 14  |
| SMMPA00254 | 23 | 16 | 18 | 46  | 40  | 28  | 22  | 30  | 29  |
| SMMPA00255 | 32 | 21 | 32 | 81  | 56  | 64  | 48  | 43  | 56  |
| SMMPA00256 | 4  | 4  | 5  | 19  | 11  | 11  | 16  | 25  | 17  |
| SMMPA00257 | 22 | 14 | 19 | 45  | 54  | 36  | 21  | 29  | 26  |
| SMMPA00258 | 13 | 10 | 11 | 14  | 18  | 19  | 22  | 26  | 22  |
| SMMPA00259 | 23 | 18 | 15 | 10  | 12  | 14  | 18  | 11  | 12  |
| SMMPA00260 | 19 | 22 | 26 | 24  | 26  | 28  | 19  | 29  | 33  |
| SMMPA00261 | 28 | 21 | 17 | 25  | 31  | 25  | 32  | 33  | 25  |
| SMMPA00262 | 11 | 17 | 17 | 57  | 50  | 48  | 33  | 28  | 25  |
| SMMPA00263 | 2  | 6  | 10 | 9   | 9   | 6   | 10  | 5   | 15  |
| SMMPA00264 | 2  | 2  | 3  | 16  | 24  | 9   | 10  | 9   | 15  |
| SMMPA00265 | 10 | 9  | 10 | 58  | 50  | 37  | 36  | 32  | 41  |
| SMMPA00266 | 23 | 16 | 21 | 188 | 143 | 118 | 79  | 137 | 100 |
| SMMPA00267 | 8  | 18 | 12 | 29  | 29  | 22  | 17  | 25  | 21  |
| SMMPA00268 | 11 | 8  | 15 | 61  | 77  | 49  | 29  | 39  | 30  |
| SMMPA00269 | 7  | 18 | 5  | 14  | 18  | 14  | 21  | 26  | 24  |
| SMMPA00270 | 23 | 19 | 23 | 38  | 38  | 39  | 21  | 36  | 31  |
| SMMPA00271 | 8  | 8  | 12 | 18  | 17  | 19  | 16  | 21  | 24  |
| SMMPA00272 | 20 | 16 | 14 | 22  | 22  | 14  | 17  | 20  | 28  |
| SMMPA00273 | 17 | 12 | 17 | 10  | 11  | 17  | 19  | 16  | 14  |
| SMMPA00274 | 20 | 17 | 9  | 376 | 365 | 334 | 151 | 207 | 183 |
| SMMPA00275 | 20 | 18 | 24 | 49  | 42  | 28  | 36  | 50  | 37  |
| SMMPA00276 | 22 | 21 | 23 | 80  | 71  | 55  | 47  | 62  | 61  |
| SMMPA00277 | 7  | 12 | 8  | 35  | 39  | 27  | 18  | 19  | 26  |
| SMMPA00278 | 14 | 9  | 14 | 18  | 22  | 16  | 14  | 25  | 31  |
| SMMPA00279 | 7  | 9  | 7  | 17  | 11  | 14  | 9   | 11  | 4   |
| SMMPA00280 | 15 | 13 | 4  | 35  | 30  | 32  | 9   | 18  | 25  |
| SMMPA00281 | 19 | 13 | 19 | 51  | 38  | 29  | 27  | 40  | 34  |
| SMMPA00282 | 9  | 8  | 3  | 1   | 6   | 3   | 8   | 13  | 6   |
| SMMPA00283 | 25 | 34 | 18 | 309 | 280 | 243 | 123 | 141 | 130 |
| SMMPA00284 | 8  | 10 | 14 | 17  | 18  | 15  | 19  | 12  | 22  |
| SMMPA00285 | 18 | 16 | 15 | 21  | 13  | 16  | 23  | 17  | 18  |
| SMMPA00286 | 23 | 22 | 11 | 28  | 34  | 25  | 15  | 22  | 34  |
| SMMPA00287 | 22 | 27 | 13 | 88  | 78  | 61  | 31  | 45  | 55  |
| SMMPA00288 | 30 | 25 | 17 | 35  | 41  | 41  | 20  | 34  | 45  |
| SMMPA00289 | 16 | 20 | 18 | 19  | 14  | 28  | 23  | 27  | 29  |
| SMMPA00290 | 24 | 16 | 20 | 11  | 20  | 13  | 40  | 28  | 42  |



|            |    |    |    |     |     |     |     |     |     |
|------------|----|----|----|-----|-----|-----|-----|-----|-----|
| SMMPA00291 | 17 | 20 | 16 | 18  | 16  | 26  | 25  | 36  | 27  |
| SMMPA00292 | 11 | 13 | 11 | 19  | 16  | 15  | 30  | 27  | 25  |
| SMMPA00293 | 29 | 18 | 26 | 44  | 44  | 32  | 41  | 40  | 36  |
| SMMPA00294 | 10 | 11 | 9  | 63  | 64  | 45  | 34  | 44  | 30  |
| SMMPA00295 | 32 | 27 | 24 | 146 | 158 | 114 | 81  | 93  | 81  |
| SMMPA00296 | 26 | 23 | 30 | 20  | 16  | 16  | 24  | 33  | 29  |
| SMMPA00297 | 6  | 11 | 9  | 27  | 27  | 13  | 17  | 21  | 16  |
| SMMPA00298 | 7  | 17 | 12 | 14  | 15  | 19  | 17  | 16  | 26  |
| SMMPA00299 | 22 | 35 | 26 | 62  | 55  | 44  | 33  | 53  | 50  |
| SMMPA00300 | 13 | 24 | 21 | 45  | 37  | 37  | 32  | 48  | 36  |
| SMMPA00301 | 10 | 7  | 4  | 8   | 5   | 14  | 7   | 12  | 8   |
| SMMPA00302 | 9  | 20 | 6  | 20  | 13  | 17  | 13  | 22  | 17  |
| SMMPA00303 | 5  | 5  | 5  | 6   | 2   | 1   | 4   | 2   | 8   |
| SMMPA00304 | 18 | 11 | 15 | 60  | 38  | 41  | 31  | 40  | 33  |
| SMMPA00305 | 8  | 8  | 16 | 12  | 9   | 10  | 8   | 17  | 8   |
| SMMPA00306 | 26 | 9  | 10 | 64  | 49  | 40  | 40  | 44  | 41  |
| SMMPA00307 | 12 | 15 | 11 | 17  | 16  | 10  | 9   | 20  | 19  |
| SMMPA00308 | 20 | 23 | 17 | 408 | 410 | 357 | 230 | 282 | 234 |
| SMMPA00309 | 9  | 10 | 9  | 18  | 29  | 12  | 5   | 10  | 6   |
| SMMPA00310 | 8  | 15 | 10 | 41  | 40  | 41  | 27  | 37  | 37  |
| SMMPA00311 | 29 | 25 | 24 | 35  | 25  | 33  | 24  | 34  | 21  |
| SMMPA00312 | 14 | 4  | 13 | 23  | 17  | 11  | 21  | 33  | 27  |
| SMMPA00313 | 19 | 11 | 9  | 14  | 14  | 11  | 9   | 19  | 24  |
| SMMPA00314 | 18 | 18 | 12 | 69  | 50  | 57  | 37  | 51  | 41  |
| SMMPA00315 | 11 | 13 | 16 | 132 | 131 | 118 | 30  | 71  | 41  |
| SMMPA00316 | 21 | 28 | 22 | 40  | 32  | 34  | 26  | 34  | 37  |
| SMMPA00317 | 29 | 33 | 24 | 60  | 51  | 43  | 26  | 37  | 31  |
| SMMPA00318 | 31 | 28 | 21 | 79  | 70  | 54  | 37  | 49  | 47  |
| SMMPA00319 | 9  | 7  | 10 | 25  | 19  | 25  | 19  | 14  | 22  |
| SMMPA00320 | 9  | 4  | 4  | 21  | 17  | 13  | 2   | 9   | 2   |
| SMMPA00321 | 20 | 20 | 20 | 52  | 31  | 29  | 29  | 35  | 29  |
| SMMPA00322 | 8  | 6  | 7  | 17  | 16  | 14  | 10  | 8   | 10  |
| SMMPA00323 | 12 | 10 | 12 | 23  | 16  | 12  | 17  | 16  | 22  |
| SMMPA00324 | 34 | 29 | 23 | 46  | 33  | 33  | 24  | 31  | 25  |
| SMMPA00325 | 21 | 18 | 23 | 30  | 15  | 41  | 28  | 35  | 32  |
| SMMPA00326 | 18 | 18 | 12 | 47  | 41  | 40  | 23  | 33  | 24  |
| SMMPA00327 | 9  | 6  | 7  | 25  | 22  | 17  | 8   | 11  | 18  |
| SMMPA00328 | 11 | 6  | 10 | 23  | 12  | 14  | 17  | 18  | 18  |
| SMMPA00329 | 26 | 30 | 28 | 50  | 51  | 43  | 44  | 57  | 50  |
| SMMPA00330 | 10 | 5  | 8  | 37  | 35  | 25  | 19  | 31  | 25  |
| SMMPA00331 | 18 | 13 | 10 | 45  | 40  | 26  | 23  | 17  | 34  |

|            |    |    |    |     |     |     |     |     |     |
|------------|----|----|----|-----|-----|-----|-----|-----|-----|
| SMMPA00332 | 13 | 11 | 15 | 19  | 16  | 20  | 14  | 17  | 26  |
| SMMPA00333 | 21 | 17 | 21 | 63  | 45  | 48  | 31  | 41  | 41  |
| SMMPA00334 | 15 | 14 | 17 | 16  | 13  | 19  | 27  | 30  | 29  |
| SMMPA00335 | 13 | 11 | 14 | 25  | 20  | 30  | 11  | 23  | 23  |
| SMMPA00336 | 11 | 19 | 20 | 75  | 63  | 47  | 29  | 31  | 28  |
| SMMPA00337 | 10 | 14 | 10 | 36  | 19  | 20  | 25  | 30  | 29  |
| SMMPA00338 | 26 | 20 | 29 | 78  | 54  | 49  | 36  | 37  | 40  |
| SMMPA00339 | 20 | 24 | 25 | 30  | 42  | 31  | 45  | 42  | 42  |
| SMMPA00340 | 12 | 8  | 8  | 6   | 16  | 10  | 10  | 10  | 11  |
| SMMPA00341 | 3  | 4  | 8  | 50  | 24  | 23  | 26  | 34  | 42  |
| SMMPA00342 | 25 | 17 | 21 | 98  | 118 | 83  | 42  | 35  | 40  |
| SMMPA00343 | 3  | 14 | 8  | 12  | 10  | 12  | 8   | 18  | 21  |
| SMMPA00344 | 15 | 11 | 10 | 43  | 46  | 34  | 17  | 31  | 9   |
| SMMPA00345 | 21 | 32 | 26 | 30  | 24  | 30  | 23  | 25  | 32  |
| SMMPA00346 | 20 | 25 | 14 | 15  | 19  | 19  | 21  | 31  | 36  |
| SMMPA00347 | 10 | 12 | 11 | 8   | 12  | 6   | 11  | 14  | 12  |
| SMMPA00348 | 10 | 6  | 6  | 50  | 55  | 46  | 21  | 41  | 31  |
| SMMPA00349 | 15 | 22 | 17 | 160 | 118 | 109 | 78  | 94  | 106 |
| SMMPA00350 | 37 | 38 | 34 | 34  | 36  | 29  | 23  | 34  | 35  |
| SMMPA00351 | 28 | 25 | 27 | 61  | 51  | 62  | 35  | 37  | 34  |
| SMMPA00352 | 11 | 3  | 11 | 7   | 11  | 8   | 16  | 22  | 20  |
| SMMPA00353 | 10 | 15 | 10 | 72  | 64  | 53  | 29  | 32  | 34  |
| SMMPA00354 | 23 | 21 | 19 | 67  | 50  | 59  | 45  | 56  | 60  |
| SMMPA00355 | 12 | 7  | 15 | 12  | 9   | 14  | 8   | 17  | 18  |
| SMMPA00356 | 9  | 8  | 10 | 36  | 43  | 20  | 12  | 16  | 19  |
| SMMPA00357 | 1  | 5  | 11 | 30  | 23  | 16  | 14  | 24  | 15  |
| SMMPA00358 | 13 | 12 | 16 | 21  | 16  | 14  | 21  | 9   | 29  |
| SMMPA00359 | 19 | 14 | 20 | 49  | 42  | 47  | 30  | 54  | 34  |
| SMMPA00360 | 15 | 19 | 17 | 639 | 517 | 434 | 325 | 383 | 415 |
| SMMPA00361 | 30 | 18 | 29 | 172 | 174 | 119 | 53  | 74  | 62  |
| SMMPA00362 | 16 | 17 | 14 | 87  | 88  | 63  | 35  | 62  | 51  |
| SMMPA00363 | 7  | 11 | 7  | 412 | 352 | 337 | 161 | 216 | 160 |
| SMMPA00364 | 12 | 10 | 7  | 63  | 60  | 44  | 29  | 38  | 28  |
| SMMPA00365 | 15 | 12 | 13 | 28  | 28  | 28  | 18  | 22  | 18  |
| SMMPA00366 | 16 | 13 | 14 | 54  | 49  | 37  | 30  | 29  | 36  |
| SMMPA00367 | 26 | 17 | 9  | 75  | 71  | 51  | 43  | 50  | 49  |
| SMMPA00368 | 14 | 10 | 9  | 31  | 30  | 19  | 10  | 12  | 23  |
| SMMPA00369 | 10 | 12 | 10 | 106 | 90  | 71  | 47  | 57  | 59  |
| SMMPA00370 | 18 | 7  | 17 | 47  | 44  | 29  | 19  | 20  | 22  |
| SMMPA00371 | 20 | 28 | 19 | 97  | 83  | 87  | 45  | 59  | 59  |
| SMMPA00372 | 28 | 19 | 18 | 100 | 82  | 63  | 57  | 52  | 66  |

|            |    |    |    |     |     |     |     |     |     |
|------------|----|----|----|-----|-----|-----|-----|-----|-----|
| SMMPA00373 | 8  | 13 | 22 | 90  | 63  | 56  | 34  | 56  | 40  |
| SMMPA00374 | 12 | 8  | 6  | 72  | 52  | 43  | 20  | 26  | 37  |
| SMMPA00375 | 26 | 22 | 20 | 126 | 113 | 103 | 70  | 66  | 59  |
| SMMPA00376 | 10 | 7  | 10 | 80  | 73  | 58  | 33  | 31  | 36  |
| SMMPA00377 | 7  | 10 | 9  | 29  | 25  | 21  | 28  | 48  | 35  |
| SMMPA00378 | 18 | 15 | 11 | 137 | 119 | 82  | 50  | 57  | 47  |
| SMMPA00379 | 14 | 11 | 12 | 24  | 17  | 16  | 17  | 30  | 32  |
| SMMPA00380 | 9  | 13 | 11 | 86  | 57  | 52  | 22  | 50  | 42  |
| SMMPA00381 | 20 | 20 | 13 | 137 | 116 | 79  | 73  | 84  | 84  |
| SMMPA00382 | 16 | 15 | 16 | 118 | 118 | 94  | 42  | 68  | 50  |
| SMMPA00383 | 9  | 11 | 7  | 105 | 64  | 54  | 33  | 39  | 32  |
| SMMPA00384 | 21 | 24 | 24 | 42  | 34  | 35  | 37  | 46  | 51  |
| SMMPA00385 | 7  | 7  | 7  | 116 | 95  | 96  | 45  | 63  | 57  |
| SMMPA00386 | 16 | 25 | 21 | 58  | 55  | 48  | 32  | 33  | 33  |
| SMMPA00387 | 16 | 14 | 22 | 96  | 84  | 73  | 53  | 62  | 58  |
| SMMPA00388 | 8  | 13 | 15 | 37  | 26  | 28  | 12  | 26  | 23  |
| SMMPA00389 | 27 | 29 | 26 | 107 | 116 | 96  | 73  | 75  | 87  |
| SMMPA00390 | 13 | 16 | 18 | 17  | 17  | 14  | 26  | 21  | 26  |
| SMMPA00391 | 25 | 32 | 19 | 10  | 17  | 13  | 16  | 18  | 25  |
| SMMPA00392 | 9  | 14 | 15 | 41  | 39  | 37  | 23  | 23  | 31  |
| SMMPA00393 | 31 | 34 | 26 | 73  | 76  | 68  | 68  | 90  | 81  |
| SMMPA00394 | 27 | 28 | 30 | 54  | 44  | 52  | 21  | 39  | 33  |
| SMMPA00395 | 15 | 11 | 8  | 19  | 9   | 5   | 21  | 31  | 14  |
| SMMPA00396 | 26 | 20 | 17 | 61  | 56  | 42  | 20  | 32  | 21  |
| SMMPA00397 | 17 | 17 | 13 | 380 | 308 | 320 | 140 | 171 | 156 |
| SMMPA00398 | 12 | 11 | 10 | 38  | 32  | 26  | 22  | 28  | 27  |
| SMMPA00399 | 20 | 21 | 26 | 59  | 54  | 44  | 33  | 30  | 31  |
| SMMPA00400 | 6  | 10 | 8  | 111 | 98  | 79  | 56  | 61  | 54  |
| SMMPA00401 | 34 | 33 | 23 | 452 | 415 | 380 | 209 | 290 | 264 |
| SMMPA00402 | 9  | 10 | 15 | 34  | 25  | 18  | 21  | 26  | 22  |
| SMMPA00403 | 15 | 17 | 11 | 82  | 69  | 57  | 28  | 45  | 26  |
| SMMPA00404 | 20 | 22 | 16 | 38  | 40  | 32  | 47  | 39  | 39  |
| SMMPA00405 | 20 | 13 | 15 | 21  | 17  | 21  | 24  | 24  | 29  |
| SMMPA00406 | 10 | 7  | 3  | 27  | 26  | 21  | 12  | 22  | 21  |
| SMMPA00407 | 22 | 24 | 20 | 25  | 25  | 20  | 23  | 38  | 31  |
| SMMPA00408 | 23 | 19 | 26 | 124 | 87  | 80  | 65  | 77  | 66  |
| SMMPA00409 | 18 | 22 | 13 | 26  | 25  | 19  | 14  | 25  | 23  |
| SMMPA00410 | 4  | 5  | 6  | 17  | 14  | 14  | 17  | 28  | 29  |
| SMMPA00411 | 20 | 17 | 14 | 52  | 31  | 38  | 30  | 46  | 36  |
| SMMPA00412 | 12 | 14 | 11 | 91  | 75  | 73  | 47  | 58  | 47  |
| SMMPA00413 | 26 | 21 | 16 | 43  | 41  | 44  | 27  | 44  | 32  |

|            |    |    |    |     |     |     |     |     |     |
|------------|----|----|----|-----|-----|-----|-----|-----|-----|
| SMMPA00414 | 10 | 11 | 14 | 20  | 31  | 25  | 12  | 40  | 39  |
| SMMPA00415 | 12 | 26 | 14 | 101 | 101 | 84  | 46  | 52  | 43  |
| SMMPA00416 | 16 | 5  | 10 | 18  | 12  | 13  | 17  | 30  | 19  |
| SMMPA00417 | 13 | 12 | 14 | 19  | 17  | 22  | 15  | 19  | 19  |
| SMMPA00418 | 20 | 20 | 13 | 37  | 35  | 33  | 30  | 17  | 27  |
| SMMPA00419 | 24 | 31 | 26 | 115 | 123 | 110 | 46  | 84  | 52  |
| SMMPA00420 | 10 | 17 | 13 | 22  | 16  | 20  | 23  | 25  | 21  |
| SMMPA00421 | 8  | 12 | 7  | 37  | 21  | 27  | 22  | 26  | 30  |
| SMMPA00422 | 5  | 15 | 15 | 21  | 30  | 23  | 14  | 24  | 25  |
| SMMPA00423 | 12 | 23 | 13 | 55  | 52  | 45  | 21  | 29  | 31  |
| SMMPA00424 | 16 | 20 | 15 | 103 | 108 | 78  | 56  | 79  | 67  |
| SMMPA00425 | 44 | 47 | 31 | 136 | 121 | 106 | 60  | 57  | 62  |
| SMMPA00426 | 9  | 13 | 12 | 53  | 53  | 39  | 19  | 42  | 19  |
| SMMPA00427 | 23 | 28 | 35 | 37  | 37  | 28  | 22  | 33  | 29  |
| SMMPA00428 | 12 | 18 | 15 | 16  | 9   | 11  | 14  | 20  | 20  |
| SMMPA00429 | 70 | 61 | 53 | 160 | 148 | 119 | 98  | 117 | 91  |
| SMMPA00430 | 20 | 24 | 22 | 305 | 312 | 254 | 131 | 146 | 107 |
| SMMPA00431 | 19 | 19 | 14 | 23  | 28  | 27  | 30  | 23  | 34  |
| SMMPA00432 | 11 | 17 | 12 | 47  | 51  | 30  | 18  | 17  | 17  |
| SMMPA00433 | 21 | 21 | 21 | 39  | 28  | 31  | 25  | 28  | 32  |
| SMMPA00434 | 8  | 8  | 6  | 17  | 13  | 10  | 21  | 26  | 16  |
| SMMPA00435 | 22 | 21 | 18 | 17  | 22  | 17  | 17  | 33  | 23  |
| SMMPA00436 | 23 | 28 | 20 | 54  | 42  | 40  | 33  | 31  | 40  |
| SMMPA00437 | 14 | 12 | 15 | 50  | 33  | 47  | 26  | 27  | 24  |
| SMMPA00438 | 10 | 12 | 21 | 28  | 30  | 27  | 22  | 31  | 11  |
| SMMPA00439 | 35 | 21 | 16 | 138 | 85  | 75  | 40  | 47  | 45  |
| SMMPA00440 | 21 | 24 | 17 | 10  | 14  | 19  | 16  | 20  | 23  |
| SMMPA00441 | 6  | 4  | 3  | 15  | 16  | 13  | 7   | 7   | 11  |
| SMMPA00442 | 18 | 26 | 25 | 195 | 209 | 140 | 91  | 102 | 98  |
| SMMPA00443 | 22 | 27 | 22 | 72  | 69  | 59  | 53  | 60  | 56  |
| SMMPA00444 | 15 | 18 | 17 | 56  | 71  | 56  | 36  | 48  | 34  |
| SMMPA00445 | 27 | 22 | 21 | 511 | 474 | 366 | 222 | 258 | 233 |
| SMMPA00446 | 28 | 33 | 25 | 41  | 46  | 47  | 31  | 39  | 37  |
| SMMPA00447 | 23 | 28 | 22 | 26  | 29  | 25  | 19  | 29  | 28  |
| SMMPA00448 | 7  | 9  | 4  | 15  | 20  | 13  | 11  | 15  | 13  |
| SMMPA00449 | 22 | 35 | 27 | 41  | 31  | 41  | 24  | 29  | 27  |
| SMMPA00450 | 17 | 24 | 21 | 214 | 215 | 173 | 115 | 156 | 126 |
| SMMPA00451 | 11 | 5  | 7  | 7   | 5   | 8   | 11  | 15  | 8   |
| SMMPA00452 | 36 | 24 | 26 | 22  | 20  | 24  | 35  | 34  | 24  |
| SMMPA00453 | 7  | 11 | 11 | 9   | 9   | 16  | 16  | 13  | 20  |
| SMMPA00454 | 11 | 11 | 9  | 37  | 35  | 39  | 27  | 44  | 30  |

|            |    |    |    |     |     |     |     |     |     |
|------------|----|----|----|-----|-----|-----|-----|-----|-----|
| SMMPA00455 | 11 | 10 | 3  | 50  | 60  | 41  | 18  | 42  | 45  |
| SMMPA00456 | 9  | 7  | 15 | 19  | 16  | 14  | 7   | 16  | 15  |
| SMMPA00457 | 9  | 16 | 9  | 58  | 56  | 47  | 21  | 55  | 35  |
| SMMPA00458 | 15 | 18 | 16 | 77  | 63  | 61  | 29  | 58  | 46  |
| SMMPA00459 | 16 | 13 | 20 | 114 | 93  | 77  | 49  | 58  | 55  |
| SMMPA00460 | 25 | 23 | 15 | 87  | 87  | 80  | 56  | 59  | 58  |
| SMMPA00461 | 6  | 15 | 7  | 45  | 44  | 20  | 25  | 24  | 28  |
| SMMPA00462 | 29 | 16 | 17 | 55  | 41  | 42  | 27  | 34  | 34  |
| SMMPA00463 | 0  | 0  | 0  | 0   | 0   | 0   | 1   | 0   | 2   |
| SMMPA00464 | 5  | 9  | 9  | 213 | 185 | 168 | 156 | 198 | 187 |
| SMMPA00465 | 22 | 27 | 20 | 159 | 98  | 105 | 61  | 77  | 66  |
| SMMPA00466 | 6  | 6  | 1  | 8   | 5   | 3   | 6   | 13  | 8   |
| SMMPA00467 | 10 | 4  | 14 | 18  | 21  | 17  | 14  | 24  | 16  |
| SMMPA00468 | 35 | 25 | 25 | 28  | 18  | 30  | 21  | 32  | 34  |
| SMMPA00469 | 14 | 18 | 20 | 21  | 22  | 21  | 17  | 24  | 25  |
| SMMPA00470 | 19 | 18 | 15 | 27  | 28  | 11  | 17  | 21  | 26  |
| SMMPA00471 | 11 | 7  | 9  | 20  | 18  | 14  | 22  | 14  | 12  |
| SMMPA00472 | 68 | 64 | 71 | 87  | 67  | 80  | 76  | 81  | 110 |
| SMMPA00473 | 5  | 5  | 3  | 37  | 33  | 29  | 14  | 15  | 14  |
| SMMPA00474 | 20 | 16 | 17 | 33  | 27  | 27  | 12  | 20  | 29  |
| SMMPA00475 | 6  | 4  | 3  | 2   | 6   | 1   | 10  | 15  | 5   |
| SMMPA00476 | 17 | 16 | 8  | 34  | 34  | 23  | 20  | 27  | 25  |
| SMMPA00477 | 29 | 40 | 30 | 48  | 48  | 29  | 23  | 42  | 41  |
| SMMPA00478 | 19 | 15 | 9  | 88  | 77  | 67  | 48  | 49  | 49  |
| SMMPA00479 | 19 | 22 | 9  | 24  | 28  | 19  | 17  | 22  | 27  |
| SMMPA00480 | 7  | 14 | 18 | 28  | 17  | 23  | 25  | 23  | 34  |
| SMMPA00481 | 19 | 21 | 17 | 266 | 268 | 231 | 108 | 142 | 134 |
| SMMPA00482 | 5  | 7  | 10 | 54  | 48  | 40  | 14  | 25  | 23  |
| SMMPA00483 | 6  | 5  | 5  | 25  | 23  | 23  | 14  | 13  | 14  |
| SMMPA00484 | 34 | 40 | 36 | 88  | 83  | 77  | 65  | 57  | 60  |
| SMMPA00485 | 33 | 42 | 31 | 44  | 26  | 28  | 31  | 43  | 33  |
| SMMPA00486 | 8  | 13 | 9  | 25  | 13  | 13  | 22  | 20  | 17  |
| SMMPA00487 | 8  | 10 | 11 | 40  | 31  | 30  | 21  | 32  | 35  |
| SMMPA00488 | 7  | 12 | 10 | 361 | 319 | 382 | 171 | 202 | 171 |
| SMMPA00489 | 12 | 19 | 6  | 58  | 60  | 50  | 26  | 36  | 23  |
| SMMPA00490 | 10 | 12 | 10 | 13  | 8   | 3   | 7   | 11  | 10  |
| SMMPA00491 | 15 | 19 | 21 | 40  | 55  | 28  | 32  | 44  | 33  |
| SMMPA00492 | 30 | 27 | 30 | 50  | 50  | 36  | 34  | 52  | 37  |
| SMMPA00493 | 14 | 21 | 17 | 24  | 22  | 30  | 16  | 21  | 30  |
| SMMPA00494 | 18 | 19 | 20 | 49  | 27  | 40  | 25  | 33  | 27  |
| SMMPA00495 | 20 | 17 | 22 | 45  | 33  | 39  | 26  | 50  | 27  |

|            |    |    |    |      |      |      |     |     |     |
|------------|----|----|----|------|------|------|-----|-----|-----|
| SMMPA00496 | 51 | 51 | 61 | 350  | 308  | 319  | 171 | 219 | 175 |
| SMMPA00497 | 29 | 30 | 22 | 1287 | 1259 | 1262 | 651 | 878 | 816 |
| SMMPA00498 | 10 | 13 | 14 | 28   | 30   | 24   | 18  | 30  | 26  |
| SMMPA00499 | 17 | 18 | 12 | 44   | 40   | 29   | 23  | 26  | 17  |
| SMMPA00500 | 10 | 10 | 8  | 17   | 14   | 10   | 11  | 11  | 12  |
| SMMPA00501 | 15 | 23 | 25 | 35   | 21   | 34   | 19  | 33  | 31  |
| SMMPA00502 | 19 | 18 | 11 | 56   | 55   | 57   | 26  | 38  | 39  |
| SMMPA00503 | 5  | 3  | 1  | 7    | 10   | 5    | 8   | 15  | 9   |
| SMMPA00504 | 8  | 8  | 11 | 66   | 54   | 41   | 28  | 30  | 39  |
| SMMPA00505 | 7  | 10 | 12 | 130  | 103  | 75   | 58  | 71  | 77  |
| SMMPA00506 | 28 | 21 | 22 | 43   | 54   | 31   | 28  | 31  | 28  |
| SMMPA00507 | 36 | 38 | 24 | 56   | 67   | 35   | 39  | 48  | 56  |
| SMMPA00508 | 33 | 29 | 27 | 61   | 38   | 43   | 23  | 41  | 27  |
| SMMPA00509 | 25 | 23 | 32 | 40   | 38   | 41   | 21  | 31  | 27  |
| SMMPA00510 | 7  | 9  | 7  | 511  | 514  | 444  | 214 | 285 | 271 |
| SMMPA00511 | 7  | 16 | 21 | 122  | 108  | 71   | 42  | 71  | 55  |
| SMMPA00512 | 11 | 21 | 16 | 41   | 37   | 32   | 27  | 34  | 31  |
| SMMPA00513 | 0  | 0  | 3  | 3    | 2    | 1    | 2   | 3   | 3   |
| SMMPA00514 | 29 | 28 | 27 | 291  | 234  | 192  | 71  | 124 | 95  |
| SMMPA00515 | 8  | 4  | 10 | 79   | 85   | 64   | 37  | 64  | 67  |
| SMMPA00516 | 5  | 7  | 3  | 106  | 59   | 62   | 40  | 53  | 48  |
| SMMPA00517 | 2  | 3  | 2  | 34   | 41   | 46   | 17  | 22  | 12  |
| SMMPA00518 | 16 | 19 | 17 | 207  | 180  | 136  | 81  | 108 | 113 |
| SMMPA00519 | 41 | 24 | 39 | 124  | 127  | 78   | 56  | 83  | 83  |
| SMMPA00520 | 7  | 8  | 9  | 506  | 389  | 392  | 274 | 349 | 314 |
| SMMPA00521 | 22 | 23 | 14 | 107  | 107  | 80   | 36  | 46  | 48  |
| SMMPA00522 | 13 | 10 | 26 | 21   | 23   | 19   | 27  | 33  | 37  |
| SMMPA00523 | 12 | 16 | 21 | 123  | 90   | 80   | 27  | 48  | 41  |
| SMMPA00524 | 13 | 10 | 9  | 25   | 16   | 16   | 24  | 26  | 28  |
| SMMPA00525 | 15 | 19 | 12 | 17   | 14   | 19   | 15  | 24  | 27  |
| SMMPA00526 | 7  | 7  | 9  | 15   | 6    | 10   | 9   | 9   | 13  |
| SMMPA00527 | 14 | 20 | 28 | 48   | 49   | 29   | 27  | 39  | 33  |
| SMMPA00528 | 6  | 9  | 3  | 9    | 9    | 10   | 12  | 12  | 11  |
| SMMPA00529 | 13 | 15 | 16 | 76   | 71   | 57   | 46  | 75  | 34  |
| SMMPA00530 | 17 | 15 | 11 | 269  | 253  | 206  | 88  | 128 | 107 |
| SMMPA00531 | 14 | 4  | 10 | 12   | 10   | 11   | 13  | 20  | 9   |
| SMMPA00532 | 15 | 12 | 15 | 31   | 22   | 24   | 29  | 28  | 29  |
| SMMPA00533 | 10 | 16 | 14 | 30   | 25   | 30   | 22  | 22  | 26  |
| SMMPA00534 | 39 | 32 | 21 | 59   | 59   | 38   | 36  | 37  | 46  |
| SMMPA00535 | 15 | 16 | 13 | 16   | 27   | 24   | 8   | 15  | 9   |
| SMMPA00536 | 26 | 26 | 20 | 56   | 41   | 33   | 28  | 42  | 35  |

|            |    |    |    |     |     |     |     |     |     |
|------------|----|----|----|-----|-----|-----|-----|-----|-----|
| SMMPA00537 | 10 | 9  | 18 | 98  | 94  | 68  | 43  | 44  | 61  |
| SMMPA00538 | 67 | 55 | 45 | 49  | 51  | 50  | 54  | 36  | 58  |
| SMMPA00539 | 13 | 10 | 18 | 35  | 30  | 27  | 15  | 31  | 20  |
| SMMPA00540 | 13 | 15 | 16 | 186 | 157 | 127 | 101 | 112 | 126 |
| SMMPA00541 | 23 | 21 | 22 | 28  | 28  | 22  | 16  | 24  | 23  |
| SMMPA00542 | 7  | 7  | 10 | 32  | 27  | 17  | 22  | 17  | 15  |
| SMMPA00543 | 6  | 9  | 5  | 56  | 51  | 44  | 22  | 27  | 28  |
| SMMPA00544 | 25 | 18 | 24 | 167 | 150 | 135 | 62  | 68  | 74  |
| SMMPA00545 | 14 | 6  | 6  | 318 | 322 | 282 | 74  | 88  | 82  |
| SMMPA00546 | 24 | 24 | 16 | 37  | 29  | 35  | 37  | 32  | 32  |
| SMMPA00547 | 14 | 13 | 14 | 17  | 9   | 16  | 14  | 23  | 25  |
| SMMPA00548 | 18 | 17 | 17 | 214 | 179 | 147 | 79  | 102 | 84  |
| SMMPA00549 | 14 | 13 | 16 | 71  | 64  | 50  | 38  | 51  | 33  |
| SMMPA00550 | 23 | 18 | 21 | 47  | 52  | 52  | 27  | 43  | 34  |
| SMMPA00551 | 17 | 23 | 15 | 17  | 13  | 12  | 12  | 15  | 24  |
| SMMPA00552 | 12 | 8  | 11 | 378 | 352 | 257 | 267 | 366 | 338 |
| SMMPA00553 | 12 | 11 | 13 | 60  | 65  | 61  | 35  | 46  | 46  |
| SMMPA00554 | 27 | 22 | 20 | 283 | 249 | 199 | 85  | 88  | 87  |
| SMMPA00555 | 4  | 9  | 5  | 72  | 84  | 53  | 39  | 24  | 31  |
| SMMPA00556 | 22 | 14 | 14 | 113 | 87  | 73  | 56  | 68  | 50  |
| SMMPA00557 | 29 | 29 | 33 | 141 | 131 | 102 | 49  | 66  | 91  |
| SMMPA00558 | 29 | 24 | 21 | 52  | 35  | 18  | 23  | 43  | 25  |
| SMMPA00559 | 13 | 15 | 13 | 297 | 249 | 214 | 70  | 110 | 72  |
| SMMPA00560 | 40 | 28 | 32 | 56  | 47  | 48  | 30  | 23  | 35  |
| SMMPA00561 | 7  | 14 | 10 | 29  | 26  | 19  | 8   | 12  | 20  |
| SMMPA00562 | 32 | 38 | 34 | 144 | 143 | 103 | 65  | 101 | 79  |
| SMMPA00563 | 10 | 11 | 13 | 30  | 13  | 21  | 8   | 29  | 20  |
| SMMPA00564 | 15 | 13 | 16 | 65  | 60  | 37  | 10  | 19  | 23  |
| SMMPA00565 | 19 | 15 | 14 | 43  | 45  | 34  | 31  | 33  | 27  |
| SMMPA00566 | 10 | 12 | 8  | 7   | 8   | 12  | 19  | 13  | 12  |
| SMMPA00567 | 13 | 16 | 16 | 41  | 28  | 30  | 31  | 32  | 45  |
| SMMPA00568 | 5  | 11 | 1  | 28  | 28  | 22  | 9   | 19  | 28  |
| SMMPA00569 | 18 | 14 | 17 | 16  | 21  | 12  | 13  | 17  | 7   |
| SMMPA00570 | 12 | 24 | 19 | 22  | 23  | 25  | 26  | 24  | 31  |
| SMMPA00571 | 18 | 18 | 23 | 268 | 255 | 230 | 124 | 160 | 157 |
| SMMPA00572 | 11 | 5  | 13 | 60  | 67  | 52  | 28  | 49  | 40  |
| SMMPA00573 | 3  | 9  | 2  | 57  | 43  | 40  | 16  | 32  | 26  |
| SMMPA00574 | 8  | 8  | 14 | 75  | 51  | 52  | 31  | 38  | 42  |
| SMMPA00575 | 20 | 13 | 5  | 33  | 26  | 25  | 22  | 21  | 22  |
| SMMPA00576 | 9  | 3  | 5  | 56  | 46  | 27  | 16  | 29  | 24  |
| SMMPA00577 | 25 | 27 | 17 | 127 | 130 | 107 | 71  | 65  | 70  |

|            |    |    |    |     |     |     |     |     |     |
|------------|----|----|----|-----|-----|-----|-----|-----|-----|
| SMMPA00578 | 15 | 19 | 20 | 130 | 91  | 91  | 55  | 95  | 83  |
| SMMPA00579 | 18 | 13 | 11 | 10  | 19  | 15  | 21  | 26  | 25  |
| SMMPA00580 | 20 | 21 | 17 | 29  | 35  | 32  | 25  | 29  | 25  |
| SMMPA00581 | 2  | 6  | 1  | 15  | 5   | 7   | 10  | 13  | 8   |
| SMMPA00582 | 14 | 12 | 12 | 20  | 17  | 19  | 15  | 25  | 21  |
| SMMPA00583 | 14 | 17 | 15 | 477 | 432 | 380 | 232 | 271 | 309 |
| SMMPA00584 | 21 | 9  | 13 | 8   | 18  | 11  | 13  | 20  | 20  |
| SMMPA00585 | 37 | 25 | 17 | 232 | 204 | 167 | 102 | 112 | 113 |
| SMMPA00586 | 14 | 10 | 18 | 40  | 40  | 20  | 16  | 26  | 27  |
| SMMPA00587 | 4  | 7  | 5  | 7   | 11  | 6   | 10  | 9   | 6   |
| SMMPA00588 | 34 | 36 | 38 | 188 | 157 | 140 | 74  | 97  | 85  |
| SMMPA00589 | 14 | 12 | 11 | 17  | 26  | 10  | 12  | 10  | 13  |
| SMMPA00590 | 14 | 18 | 27 | 38  | 24  | 26  | 26  | 34  | 26  |
| SMMPA00591 | 39 | 33 | 27 | 231 | 183 | 153 | 80  | 134 | 112 |
| SMMPA00592 | 9  | 9  | 11 | 6   | 6   | 7   | 15  | 12  | 15  |
| SMMPA00593 | 15 | 15 | 10 | 18  | 17  | 16  | 25  | 14  | 27  |
| SMMPA00594 | 34 | 38 | 31 | 119 | 129 | 109 | 55  | 56  | 60  |
| SMMPA00595 | 15 | 17 | 7  | 48  | 34  | 33  | 51  | 54  | 54  |
| SMMPA00596 | 11 | 7  | 17 | 13  | 15  | 11  | 15  | 17  | 14  |
| SMMPA00597 | 15 | 15 | 10 | 21  | 16  | 16  | 16  | 22  | 33  |
| SMMPA00598 | 15 | 12 | 11 | 117 | 117 | 91  | 47  | 50  | 47  |
| SMMPA00599 | 2  | 5  | 2  | 12  | 11  | 17  | 4   | 9   | 7   |
| SMMPA00600 | 10 | 9  | 15 | 67  | 83  | 64  | 38  | 37  | 50  |
| SMMPA00601 | 22 | 37 | 19 | 23  | 21  | 20  | 20  | 24  | 26  |
| SMMPA00602 | 24 | 24 | 23 | 362 | 284 | 237 | 101 | 135 | 128 |
| SMMPA00603 | 11 | 9  | 10 | 8   | 7   | 10  | 13  | 11  | 20  |
| SMMPA00604 | 5  | 6  | 4  | 19  | 29  | 9   | 6   | 19  | 19  |
| SMMPA00605 | 12 | 12 | 17 | 35  | 28  | 18  | 12  | 37  | 26  |
| SMMPA00606 | 19 | 15 | 14 | 242 | 208 | 163 | 110 | 103 | 112 |
| SMMPA00607 | 9  | 14 | 8  | 188 | 151 | 146 | 76  | 94  | 109 |
| SMMPA00608 | 21 | 13 | 12 | 38  | 29  | 26  | 29  | 34  | 29  |
| SMMPA00609 | 7  | 6  | 4  | 16  | 12  | 15  | 7   | 10  | 14  |
| SMMPA00610 | 15 | 19 | 24 | 102 | 82  | 80  | 46  | 51  | 37  |
| SMMPA00611 | 17 | 9  | 17 | 197 | 160 | 121 | 78  | 97  | 83  |
| SMMPA00612 | 24 | 10 | 15 | 741 | 684 | 588 | 320 | 421 | 357 |
| SMMPA00613 | 7  | 12 | 14 | 43  | 54  | 33  | 34  | 30  | 22  |
| SMMPA00614 | 21 | 24 | 16 | 240 | 189 | 139 | 74  | 96  | 107 |
| SMMPA00615 | 33 | 22 | 14 | 49  | 44  | 33  | 24  | 31  | 23  |
| SMMPA00616 | 8  | 4  | 5  | 54  | 51  | 43  | 19  | 26  | 40  |
| SMMPA00617 | 50 | 65 | 50 | 103 | 108 | 67  | 63  | 68  | 76  |
| SMMPA00618 | 22 | 21 | 17 | 29  | 19  | 17  | 23  | 26  | 25  |



|            |    |    |    |     |     |     |     |     |     |
|------------|----|----|----|-----|-----|-----|-----|-----|-----|
| SMMPA00619 | 9  | 5  | 13 | 20  | 19  | 15  | 8   | 22  | 12  |
| SMMPA00620 | 16 | 19 | 19 | 104 | 86  | 74  | 38  | 49  | 52  |
| SMMPA00621 | 3  | 4  | 6  | 12  | 8   | 9   | 6   | 8   | 6   |
| SMMPA00622 | 7  | 8  | 5  | 19  | 22  | 20  | 20  | 21  | 17  |
| SMMPA00623 | 12 | 21 | 9  | 45  | 51  | 27  | 34  | 36  | 27  |
| SMMPA00624 | 26 | 37 | 28 | 107 | 74  | 62  | 40  | 66  | 45  |
| SMMPA00625 | 2  | 6  | 6  | 84  | 87  | 60  | 32  | 45  | 28  |
| SMMPA00626 | 23 | 20 | 19 | 31  | 28  | 20  | 19  | 26  | 39  |
| SMMPA00627 | 19 | 20 | 14 | 16  | 17  | 18  | 20  | 22  | 22  |
| SMMPA00628 | 11 | 10 | 9  | 41  | 30  | 24  | 21  | 25  | 29  |
| SMMPA00629 | 7  | 9  | 6  | 18  | 15  | 14  | 8   | 10  | 10  |
| SMMPA00630 | 8  | 8  | 8  | 116 | 109 | 77  | 39  | 26  | 42  |
| SMMPA00631 | 18 | 14 | 11 | 102 | 80  | 63  | 34  | 41  | 35  |
| SMMPA00632 | 8  | 6  | 5  | 162 | 172 | 149 | 95  | 152 | 126 |
| SMMPA00633 | 25 | 31 | 20 | 216 | 194 | 149 | 75  | 121 | 103 |
| SMMPA00634 | 7  | 6  | 7  | 8   | 7   | 6   | 10  | 8   | 8   |
| SMMPA00635 | 23 | 22 | 20 | 408 | 359 | 320 | 152 | 195 | 183 |
| SMMPA00636 | 29 | 17 | 22 | 64  | 75  | 62  | 37  | 48  | 50  |
| SMMPA00637 | 22 | 28 | 35 | 36  | 26  | 30  | 31  | 38  | 25  |
| SMMPA00638 | 8  | 16 | 22 | 66  | 57  | 47  | 30  | 40  | 45  |
| SMMPA00639 | 32 | 27 | 20 | 26  | 26  | 19  | 33  | 36  | 30  |
| SMMPA00640 | 10 | 15 | 16 | 79  | 72  | 54  | 29  | 46  | 37  |
| SMMPA00641 | 8  | 6  | 10 | 64  | 68  | 56  | 30  | 37  | 22  |
| SMMPA00642 | 21 | 19 | 29 | 345 | 299 | 241 | 105 | 160 | 157 |
| SMMPA00643 | 16 | 13 | 18 | 63  | 53  | 35  | 45  | 54  | 48  |
| SMMPA00644 | 26 | 18 | 20 | 34  | 30  | 28  | 39  | 45  | 35  |
| SMMPA00645 | 12 | 10 | 19 | 42  | 37  | 21  | 20  | 28  | 30  |
| SMMPA00646 | 11 | 17 | 14 | 127 | 119 | 86  | 45  | 61  | 42  |
| SMMPA00647 | 15 | 12 | 14 | 81  | 82  | 49  | 46  | 52  | 49  |
| SMMPA00648 | 7  | 2  | 7  | 11  | 13  | 10  | 5   | 11  | 8   |
| SMMPA00649 | 19 | 9  | 8  | 46  | 41  | 47  | 33  | 42  | 44  |
| SMMPA00650 | 26 | 36 | 19 | 131 | 160 | 129 | 46  | 63  | 77  |
| SMMPA00651 | 25 | 27 | 33 | 65  | 49  | 55  | 28  | 49  | 46  |
| SMMPA00652 | 7  | 17 | 9  | 272 | 242 | 212 | 134 | 141 | 125 |
| SMMPA00653 | 20 | 17 | 27 | 106 | 63  | 55  | 37  | 45  | 47  |
| SMMPA00654 | 9  | 12 | 7  | 148 | 144 | 114 | 41  | 82  | 65  |
| SMMPA00655 | 18 | 27 | 23 | 34  | 42  | 23  | 23  | 37  | 42  |
| SMMPA00656 | 5  | 7  | 10 | 57  | 35  | 24  | 19  | 17  | 20  |
| SMMPA00657 | 12 | 13 | 7  | 44  | 35  | 29  | 28  | 32  | 25  |
| SMMPA00658 | 11 | 9  | 15 | 22  | 14  | 19  | 14  | 19  | 18  |
| SMMPA00659 | 11 | 10 | 9  | 28  | 27  | 25  | 16  | 28  | 24  |

|            |    |    |    |     |     |     |     |     |     |
|------------|----|----|----|-----|-----|-----|-----|-----|-----|
| SMMPA00660 | 4  | 5  | 3  | 73  | 60  | 59  | 29  | 38  | 28  |
| SMMPA00661 | 23 | 19 | 16 | 185 | 177 | 150 | 71  | 87  | 95  |
| SMMPA00662 | 19 | 29 | 25 | 59  | 63  | 46  | 34  | 45  | 47  |
| SMMPA00663 | 18 | 25 | 16 | 68  | 59  | 58  | 44  | 55  | 68  |
| SMMPA00664 | 11 | 20 | 10 | 79  | 85  | 67  | 45  | 54  | 29  |
| SMMPA00665 | 11 | 13 | 14 | 364 | 329 | 274 | 192 | 232 | 198 |
| SMMPA00666 | 6  | 12 | 7  | 11  | 10  | 8   | 13  | 10  | 13  |
| SMMPA00667 | 15 | 31 | 9  | 79  | 89  | 71  | 23  | 28  | 26  |
| SMMPA00668 | 14 | 21 | 13 | 213 | 213 | 137 | 53  | 61  | 80  |
| SMMPA00669 | 12 | 9  | 11 | 22  | 19  | 17  | 19  | 20  | 15  |
| SMMPA00670 | 9  | 6  | 4  | 20  | 23  | 14  | 18  | 14  | 28  |
| SMMPA00671 | 11 | 9  | 12 | 13  | 13  | 15  | 12  | 13  | 24  |
| SMMPA00672 | 11 | 16 | 15 | 77  | 67  | 60  | 36  | 68  | 62  |
| SMMPA00673 | 15 | 16 | 15 | 48  | 38  | 40  | 39  | 31  | 35  |
| SMMPA00674 | 8  | 8  | 11 | 10  | 7   | 5   | 13  | 26  | 15  |
| SMMPA00675 | 21 | 16 | 25 | 152 | 99  | 97  | 47  | 62  | 63  |
| SMMPA00676 | 24 | 15 | 21 | 53  | 50  | 36  | 32  | 30  | 41  |
| SMMPA00677 | 15 | 6  | 16 | 15  | 16  | 13  | 13  | 20  | 18  |
| SMMPA00678 | 22 | 17 | 25 | 72  | 70  | 61  | 40  | 51  | 61  |
| SMMPA00679 | 9  | 8  | 10 | 55  | 35  | 42  | 21  | 43  | 35  |
| SMMPA00680 | 15 | 11 | 16 | 20  | 22  | 14  | 24  | 24  | 16  |
| SMMPA00681 | 32 | 37 | 27 | 223 | 262 | 164 | 105 | 136 | 135 |
| SMMPA00682 | 29 | 29 | 23 | 282 | 243 | 206 | 85  | 122 | 107 |
| SMMPA00683 | 32 | 26 | 24 | 49  | 44  | 50  | 34  | 53  | 40  |
| SMMPA00684 | 9  | 23 | 20 | 49  | 39  | 47  | 21  | 31  | 22  |
| SMMPA00685 | 8  | 14 | 17 | 58  | 49  | 38  | 25  | 35  | 33  |
| SMMPA00686 | 8  | 9  | 10 | 477 | 505 | 427 | 287 | 391 | 359 |
| SMMPA00687 | 14 | 18 | 13 | 175 | 131 | 115 | 75  | 94  | 74  |
| SMMPA00688 | 5  | 6  | 9  | 11  | 16  | 16  | 9   | 20  | 12  |
| SMMPA00689 | 13 | 17 | 13 | 830 | 752 | 670 | 301 | 453 | 368 |
| SMMPA00690 | 26 | 22 | 17 | 70  | 79  | 69  | 40  | 70  | 57  |
| SMMPA00691 | 4  | 7  | 6  | 20  | 21  | 13  | 12  | 8   | 11  |
| SMMPA00692 | 8  | 10 | 12 | 29  | 17  | 18  | 18  | 19  | 22  |
| SMMPA00693 | 6  | 6  | 0  | 5   | 4   | 3   | 3   | 4   | 4   |
| SMMPA00694 | 9  | 18 | 20 | 294 | 280 | 224 | 126 | 173 | 147 |
| SMMPA00695 | 24 | 20 | 23 | 48  | 43  | 48  | 38  | 37  | 40  |
| SMMPA00696 | 10 | 12 | 9  | 20  | 26  | 22  | 26  | 23  | 20  |
| SMMPA00697 | 12 | 10 | 9  | 58  | 53  | 40  | 33  | 31  | 32  |
| SMMPA00698 | 48 | 44 | 30 | 83  | 71  | 75  | 41  | 64  | 62  |
| SMMPA00699 | 11 | 11 | 9  | 246 | 227 | 201 | 90  | 113 | 120 |
| SMMPA00700 | 97 | 90 | 74 | 59  | 56  | 53  | 47  | 72  | 62  |

|            |    |     |    |     |     |     |     |     |     |
|------------|----|-----|----|-----|-----|-----|-----|-----|-----|
| SMMPA00701 | 9  | 8   | 12 | 547 | 475 | 407 | 274 | 363 | 321 |
| SMMPA00702 | 16 | 21  | 7  | 67  | 80  | 67  | 32  | 39  | 49  |
| SMMPA00703 | 2  | 3   | 1  | 1   | 3   | 3   | 2   | 2   | 3   |
| SMMPA00704 | 21 | 9   | 25 | 307 | 250 | 203 | 77  | 117 | 94  |
| SMMPA00705 | 7  | 12  | 13 | 10  | 10  | 10  | 21  | 20  | 16  |
| SMMPA00706 | 26 | 10  | 16 | 96  | 85  | 58  | 49  | 60  | 63  |
| SMMPA00707 | 17 | 13  | 16 | 22  | 31  | 23  | 25  | 23  | 24  |
| SMMPA00708 | 5  | 5   | 11 | 32  | 16  | 23  | 16  | 28  | 27  |
| SMMPA00709 | 20 | 24  | 26 | 614 | 565 | 488 | 219 | 285 | 245 |
| SMMPA00710 | 26 | 28  | 17 | 22  | 15  | 20  | 32  | 27  | 25  |
| SMMPA00711 | 20 | 19  | 26 | 62  | 40  | 38  | 25  | 42  | 33  |
| SMMPA00712 | 12 | 14  | 13 | 17  | 17  | 20  | 12  | 17  | 18  |
| SMMPA00713 | 29 | 23  | 33 | 42  | 59  | 40  | 38  | 42  | 51  |
| SMMPA00714 | 6  | 12  | 16 | 39  | 43  | 29  | 21  | 26  | 22  |
| SMMPA00715 | 12 | 15  | 13 | 94  | 119 | 73  | 40  | 60  | 52  |
| SMMPA00716 | 2  | 2   | 2  | 10  | 11  | 24  | 7   | 6   | 6   |
| SMMPA00717 | 11 | 11  | 15 | 53  | 50  | 39  | 22  | 25  | 30  |
| SMMPA00718 | 19 | 27  | 20 | 57  | 47  | 32  | 28  | 40  | 41  |
| SMMPA00719 | 10 | 17  | 18 | 41  | 30  | 37  | 15  | 15  | 16  |
| SMMPA00720 | 16 | 30  | 15 | 45  | 44  | 37  | 26  | 33  | 28  |
| SMMPA00721 | 43 | 32  | 26 | 101 | 98  | 78  | 54  | 70  | 67  |
| SMMPA00722 | 34 | 33  | 29 | 63  | 58  | 55  | 38  | 56  | 49  |
| SMMPA00723 | 9  | 11  | 11 | 16  | 10  | 16  | 16  | 21  | 21  |
| SMMPA00724 | 8  | 15  | 21 | 236 | 213 | 165 | 76  | 100 | 108 |
| SMMPA00725 | 8  | 16  | 6  | 136 | 136 | 109 | 58  | 60  | 70  |
| SMMPA00726 | 14 | 11  | 13 | 24  | 14  | 16  | 15  | 16  | 13  |
| SMMPA00727 | 3  | 9   | 9  | 20  | 14  | 14  | 11  | 9   | 8   |
| SMMPA00728 | 17 | 14  | 10 | 348 | 315 | 276 | 82  | 117 | 112 |
| SMMPA00729 | 10 | 18  | 8  | 70  | 72  | 44  | 35  | 56  | 51  |
| SMMPA00730 | 10 | 15  | 7  | 73  | 39  | 49  | 27  | 43  | 32  |
| SMMPA00731 | 84 | 108 | 82 | 135 | 120 | 117 | 83  | 120 | 105 |
| SMMPA00732 | 12 | 9   | 9  | 95  | 71  | 58  | 48  | 49  | 44  |
| SMMPA00733 | 9  | 14  | 12 | 17  | 16  | 28  | 14  | 27  | 24  |
| SMMPA00734 | 8  | 16  | 8  | 28  | 15  | 26  | 25  | 19  | 24  |
| SMMPA00735 | 13 | 5   | 10 | 93  | 92  | 56  | 40  | 47  | 47  |
| SMMPA00736 | 12 | 21  | 19 | 13  | 17  | 17  | 20  | 22  | 23  |
| SMMPA00737 | 5  | 6   | 13 | 14  | 13  | 11  | 11  | 9   | 13  |
| SMMPA00738 | 17 | 12  | 22 | 21  | 20  | 14  | 16  | 19  | 21  |
| SMMPA00739 | 4  | 6   | 5  | 18  | 16  | 21  | 18  | 18  | 24  |
| SMMPA00740 | 4  | 9   | 5  | 7   | 7   | 10  | 13  | 11  | 14  |
| SMMPA00741 | 7  | 10  | 9  | 12  | 8   | 12  | 18  | 10  | 17  |

|            |    |    |    |     |     |     |     |     |     |
|------------|----|----|----|-----|-----|-----|-----|-----|-----|
| SMMPA00742 | 7  | 22 | 18 | 51  | 58  | 44  | 24  | 25  | 44  |
| SMMPA00743 | 4  | 8  | 6  | 17  | 17  | 22  | 10  | 16  | 12  |
| SMMPA00744 | 9  | 6  | 9  | 212 | 222 | 140 | 91  | 118 | 103 |
| SMMPA00745 | 2  | 6  | 4  | 6   | 7   | 5   | 7   | 6   | 3   |
| SMMPA00746 | 8  | 15 | 12 | 9   | 11  | 8   | 18  | 22  | 11  |
| SMMPA00747 | 14 | 19 | 18 | 33  | 43  | 25  | 28  | 27  | 38  |
| SMMPA00748 | 13 | 13 | 13 | 15  | 9   | 16  | 10  | 9   | 11  |
| SMMPA00749 | 17 | 6  | 8  | 69  | 38  | 40  | 31  | 37  | 43  |
| SMMPA00750 | 24 | 25 | 26 | 48  | 30  | 28  | 34  | 50  | 40  |
| SMMPA00751 | 15 | 15 | 10 | 7   | 12  | 15  | 14  | 25  | 12  |
| SMMPA00752 | 7  | 2  | 5  | 15  | 13  | 21  | 13  | 14  | 12  |
| SMMPA00753 | 38 | 31 | 38 | 153 | 131 | 126 | 79  | 108 | 84  |
| SMMPA00754 | 10 | 17 | 8  | 37  | 26  | 30  | 15  | 26  | 23  |
| SMMPA00755 | 16 | 5  | 7  | 62  | 43  | 39  | 35  | 37  | 38  |
| SMMPA00756 | 10 | 14 | 8  | 12  | 10  | 6   | 6   | 10  | 14  |
| SMMPA00757 | 4  | 3  | 5  | 20  | 20  | 21  | 11  | 13  | 20  |
| SMMPA00758 | 25 | 34 | 23 | 34  | 33  | 32  | 31  | 35  | 37  |
| SMMPA00759 | 30 | 18 | 24 | 42  | 48  | 29  | 42  | 38  | 45  |
| SMMPA00760 | 12 | 17 | 19 | 21  | 18  | 14  | 15  | 16  | 22  |
| SMMPA00761 | 19 | 24 | 17 | 523 | 479 | 416 | 175 | 254 | 224 |
| SMMPA00762 | 7  | 14 | 8  | 20  | 26  | 17  | 10  | 16  | 20  |
| SMMPA00763 | 12 | 21 | 18 | 157 | 162 | 119 | 67  | 79  | 78  |
| SMMPA00764 | 71 | 72 | 49 | 90  | 63  | 77  | 71  | 90  | 76  |
| SMMPA00765 | 22 | 17 | 25 | 47  | 37  | 43  | 28  | 42  | 35  |
| SMMPA00766 | 27 | 26 | 27 | 32  | 42  | 38  | 28  | 30  | 31  |
| SMMPA00767 | 26 | 21 | 24 | 85  | 82  | 56  | 28  | 43  | 38  |
| SMMPA00768 | 18 | 18 | 21 | 198 | 166 | 140 | 94  | 112 | 128 |
| SMMPA00769 | 24 | 31 | 23 | 21  | 27  | 32  | 24  | 22  | 21  |
| SMMPA00770 | 14 | 16 | 11 | 49  | 48  | 34  | 19  | 34  | 23  |
| SMMPA00771 | 7  | 14 | 12 | 55  | 45  | 23  | 25  | 30  | 23  |
| SMMPA00772 | 16 | 26 | 11 | 31  | 23  | 30  | 25  | 32  | 31  |
| SMMPA00773 | 22 | 10 | 12 | 46  | 81  | 59  | 31  | 41  | 26  |
| SMMPA00774 | 16 | 14 | 9  | 16  | 16  | 18  | 11  | 18  | 16  |
| SMMPA00775 | 13 | 11 | 15 | 67  | 67  | 54  | 31  | 40  | 31  |
| SMMPA00776 | 25 | 18 | 21 | 57  | 42  | 42  | 34  | 59  | 46  |
| SMMPA00777 | 17 | 23 | 25 | 141 | 148 | 116 | 65  | 76  | 66  |
| SMMPA00778 | 16 | 15 | 19 | 56  | 50  | 32  | 22  | 21  | 16  |
| SMMPA00779 | 16 | 21 | 19 | 25  | 23  | 9   | 23  | 25  | 21  |
| SMMPA00780 | 18 | 17 | 26 | 96  | 87  | 65  | 31  | 46  | 48  |
| SMMPA00781 | 23 | 13 | 27 | 170 | 142 | 125 | 66  | 83  | 87  |
| SMMPA00782 | 30 | 29 | 27 | 35  | 33  | 29  | 29  | 30  | 34  |

|            |    |    |    |     |     |     |     |     |     |
|------------|----|----|----|-----|-----|-----|-----|-----|-----|
| SMMPA00783 | 2  | 2  | 1  | 14  | 14  | 8   | 10  | 11  | 11  |
| SMMPA00784 | 11 | 14 | 16 | 64  | 53  | 36  | 25  | 36  | 48  |
| SMMPA00785 | 16 | 21 | 14 | 284 | 226 | 237 | 82  | 111 | 83  |
| SMMPA00786 | 13 | 16 | 8  | 107 | 115 | 80  | 75  | 80  | 72  |
| SMMPA00787 | 9  | 11 | 10 | 36  | 40  | 31  | 23  | 27  | 11  |
| SMMPA00788 | 25 | 31 | 23 | 206 | 189 | 175 | 70  | 92  | 79  |
| SMMPA00789 | 27 | 36 | 23 | 134 | 107 | 97  | 49  | 72  | 64  |
| SMMPA00790 | 3  | 5  | 5  | 12  | 5   | 8   | 2   | 2   | 4   |
| SMMPA00791 | 12 | 23 | 16 | 36  | 28  | 22  | 19  | 39  | 18  |
| SMMPA00792 | 12 | 14 | 14 | 218 | 183 | 148 | 94  | 127 | 107 |
| SMMPA00793 | 10 | 15 | 11 | 17  | 15  | 13  | 14  | 6   | 16  |
| SMMPA00794 | 11 | 12 | 8  | 19  | 24  | 15  | 14  | 17  | 17  |
| SMMPA00795 | 19 | 30 | 22 | 36  | 37  | 25  | 29  | 48  | 39  |
| SMMPA00796 | 30 | 27 | 17 | 46  | 49  | 50  | 37  | 45  | 44  |
| SMMPA00797 | 15 | 32 | 22 | 179 | 156 | 128 | 73  | 99  | 82  |
| SMMPA00798 | 21 | 11 | 15 | 18  | 17  | 17  | 14  | 23  | 21  |
| SMMPA00799 | 15 | 8  | 6  | 82  | 69  | 58  | 35  | 40  | 45  |
| SMMPA00800 | 8  | 15 | 12 | 168 | 135 | 90  | 48  | 72  | 48  |
| SMMPA00801 | 8  | 4  | 7  | 11  | 8   | 6   | 10  | 13  | 3   |
| SMMPA00802 | 15 | 12 | 20 | 28  | 27  | 32  | 23  | 30  | 39  |
| SMMPA00803 | 25 | 12 | 13 | 123 | 131 | 87  | 44  | 68  | 53  |
| SMMPA00804 | 21 | 33 | 36 | 48  | 48  | 34  | 40  | 57  | 51  |
| SMMPA00805 | 17 | 32 | 29 | 91  | 89  | 64  | 55  | 53  | 78  |
| SMMPA00806 | 24 | 21 | 14 | 88  | 49  | 56  | 47  | 43  | 51  |
| SMMPA00807 | 7  | 3  | 3  | 21  | 20  | 17  | 17  | 12  | 6   |
| SMMPA00808 | 17 | 16 | 18 | 152 | 153 | 117 | 76  | 73  | 89  |
| SMMPA00809 | 16 | 22 | 12 | 29  | 21  | 18  | 16  | 32  | 32  |
| SMMPA00810 | 7  | 9  | 12 | 36  | 21  | 15  | 19  | 10  | 17  |
| SMMPA00811 | 10 | 17 | 24 | 46  | 37  | 33  | 18  | 47  | 29  |
| SMMPA00812 | 25 | 19 | 15 | 35  | 35  | 36  | 18  | 44  | 44  |
| SMMPA00813 | 11 | 11 | 11 | 55  | 36  | 39  | 27  | 30  | 41  |
| SMMPA00814 | 26 | 24 | 17 | 38  | 17  | 24  | 27  | 25  | 23  |
| SMMPA00815 | 10 | 15 | 15 | 133 | 148 | 91  | 47  | 69  | 71  |
| SMMPA00816 | 39 | 28 | 28 | 18  | 10  | 32  | 32  | 39  | 35  |
| SMMPA00817 | 22 | 16 | 14 | 22  | 14  | 27  | 22  | 24  | 24  |
| SMMPA00818 | 12 | 16 | 11 | 26  | 21  | 20  | 18  | 33  | 17  |
| SMMPA00819 | 21 | 16 | 21 | 106 | 95  | 70  | 44  | 73  | 49  |
| SMMPA00820 | 1  | 4  | 5  | 8   | 14  | 11  | 6   | 8   | 7   |
| SMMPA00821 | 27 | 28 | 31 | 263 | 241 | 180 | 104 | 132 | 107 |
| SMMPA00822 | 20 | 21 | 13 | 44  | 48  | 29  | 26  | 29  | 26  |
| SMMPA00823 | 14 | 22 | 14 | 91  | 66  | 63  | 40  | 47  | 53  |

|            |    |    |    |     |     |     |     |     |     |
|------------|----|----|----|-----|-----|-----|-----|-----|-----|
| SMMPA00824 | 9  | 8  | 22 | 51  | 41  | 30  | 19  | 24  | 21  |
| SMMPA00825 | 26 | 17 | 27 | 26  | 29  | 29  | 23  | 38  | 40  |
| SMMPA00826 | 15 | 12 | 10 | 42  | 41  | 33  | 22  | 23  | 21  |
| SMMPA00827 | 5  | 7  | 2  | 29  | 17  | 22  | 25  | 35  | 27  |
| SMMPA00828 | 19 | 11 | 19 | 28  | 31  | 31  | 26  | 25  | 26  |
| SMMPA00829 | 11 | 18 | 12 | 15  | 20  | 13  | 11  | 15  | 12  |
| SMMPA00830 | 4  | 8  | 9  | 12  | 9   | 8   | 6   | 10  | 15  |
| SMMPA00831 | 29 | 33 | 41 | 54  | 58  | 49  | 22  | 49  | 42  |
| SMMPA00832 | 18 | 21 | 14 | 19  | 16  | 20  | 15  | 25  | 31  |
| SMMPA00833 | 22 | 31 | 15 | 88  | 75  | 49  | 39  | 59  | 37  |
| SMMPA00834 | 20 | 20 | 13 | 315 | 285 | 235 | 89  | 112 | 109 |
| SMMPA00835 | 6  | 7  | 4  | 25  | 36  | 33  | 18  | 22  | 12  |
| SMMPA00836 | 10 | 10 | 7  | 29  | 18  | 27  | 11  | 29  | 33  |
| SMMPA00837 | 18 | 15 | 13 | 635 | 610 | 585 | 288 | 371 | 331 |
| SMMPA00838 | 19 | 15 | 19 | 38  | 54  | 35  | 31  | 34  | 29  |
| SMMPA00839 | 20 | 19 | 10 | 25  | 29  | 25  | 18  | 25  | 24  |
| SMMPA00840 | 24 | 30 | 28 | 31  | 33  | 34  | 33  | 40  | 36  |
| SMMPA00841 | 37 | 20 | 17 | 30  | 22  | 21  | 26  | 22  | 31  |
| SMMPA00842 | 11 | 17 | 13 | 347 | 386 | 284 | 155 | 216 | 183 |
| SMMPA00843 | 21 | 29 | 24 | 310 | 297 | 249 | 84  | 91  | 104 |
| SMMPA00844 | 9  | 5  | 8  | 9   | 14  | 10  | 17  | 18  | 22  |
| SMMPA00845 | 6  | 2  | 3  | 5   | 12  | 11  | 6   | 9   | 7   |
| SMMPA00846 | 17 | 18 | 16 | 105 | 123 | 113 | 46  | 46  | 45  |
| SMMPA00847 | 14 | 18 | 17 | 45  | 44  | 47  | 15  | 25  | 28  |
| SMMPA00848 | 19 | 12 | 30 | 49  | 65  | 35  | 31  | 35  | 26  |
| SMMPA00849 | 9  | 7  | 13 | 18  | 15  | 27  | 25  | 35  | 21  |
| SMMPA00850 | 27 | 20 | 28 | 65  | 70  | 53  | 48  | 66  | 61  |
| SMMPA00851 | 20 | 26 | 19 | 51  | 51  | 46  | 35  | 42  | 34  |
| SMMPA00852 | 25 | 31 | 20 | 89  | 71  | 54  | 50  | 61  | 61  |
| SMMPA00853 | 27 | 27 | 24 | 57  | 57  | 48  | 55  | 60  | 47  |
| SMMPA00854 | 15 | 16 | 19 | 19  | 29  | 21  | 20  | 26  | 25  |
| SMMPA00855 | 27 | 30 | 23 | 257 | 223 | 188 | 121 | 156 | 126 |
| SMMPA00856 | 21 | 30 | 20 | 94  | 76  | 55  | 34  | 39  | 61  |
| SMMPA00857 | 13 | 5  | 5  | 37  | 39  | 37  | 15  | 18  | 19  |
| SMMPA00858 | 16 | 21 | 14 | 291 | 242 | 204 | 141 | 162 | 136 |
| SMMPA00859 | 7  | 7  | 2  | 76  | 64  | 49  | 26  | 30  | 28  |
| SMMPA00860 | 19 | 20 | 22 | 111 | 105 | 75  | 53  | 57  | 62  |
| SMMPA00861 | 8  | 3  | 3  | 9   | 7   | 11  | 2   | 4   | 10  |
| SMMPA00862 | 26 | 28 | 22 | 47  | 30  | 35  | 19  | 33  | 34  |
| SMMPA00863 | 20 | 18 | 29 | 93  | 78  | 58  | 52  | 60  | 38  |
| SMMPA00864 | 18 | 22 | 22 | 28  | 21  | 22  | 22  | 39  | 41  |

|            |    |    |    |     |     |     |     |     |     |
|------------|----|----|----|-----|-----|-----|-----|-----|-----|
| SMMPA00865 | 38 | 30 | 26 | 224 | 212 | 140 | 70  | 102 | 70  |
| SMMPA00866 | 15 | 20 | 19 | 316 | 269 | 219 | 124 | 137 | 130 |
| SMMPA00867 | 24 | 20 | 19 | 44  | 22  | 34  | 19  | 32  | 30  |
| SMMPA00868 | 11 | 5  | 4  | 228 | 219 | 204 | 76  | 109 | 92  |
| SMMPA00869 | 15 | 8  | 10 | 38  | 29  | 28  | 21  | 21  | 20  |
| SMMPA00870 | 26 | 24 | 22 | 44  | 33  | 30  | 22  | 33  | 33  |
| SMMPA00871 | 22 | 19 | 30 | 81  | 65  | 60  | 47  | 68  | 59  |
| SMMPA00872 | 4  | 5  | 7  | 7   | 7   | 3   | 9   | 10  | 12  |
| SMMPA00873 | 15 | 21 | 8  | 17  | 12  | 12  | 14  | 17  | 16  |
| SMMPA00874 | 17 | 20 | 15 | 82  | 79  | 46  | 30  | 57  | 43  |
| SMMPA00875 | 11 | 8  | 17 | 14  | 10  | 10  | 6   | 16  | 18  |
| SMMPA00876 | 19 | 15 | 16 | 45  | 42  | 31  | 39  | 30  | 35  |
| SMMPA00877 | 7  | 12 | 4  | 9   | 15  | 11  | 8   | 6   | 19  |
| SMMPA00878 | 7  | 2  | 4  | 11  | 14  | 16  | 17  | 15  | 11  |
| SMMPA00879 | 12 | 14 | 22 | 24  | 24  | 25  | 19  | 42  | 20  |
| SMMPA00880 | 25 | 23 | 24 | 126 | 117 | 95  | 56  | 74  | 71  |
| SMMPA00881 | 22 | 14 | 20 | 14  | 12  | 18  | 21  | 27  | 26  |
| SMMPA00882 | 27 | 25 | 33 | 170 | 168 | 119 | 42  | 69  | 69  |
| SMMPA00883 | 12 | 10 | 15 | 58  | 46  | 33  | 24  | 36  | 30  |
| SMMPA00884 | 25 | 30 | 24 | 105 | 106 | 96  | 39  | 60  | 41  |
| SMMPA00885 | 7  | 7  | 7  | 101 | 96  | 77  | 43  | 45  | 52  |
| SMMPA00886 | 17 | 14 | 12 | 32  | 39  | 19  | 17  | 17  | 28  |
| SMMPA00887 | 8  | 14 | 7  | 28  | 21  | 28  | 12  | 12  | 26  |
| SMMPA00888 | 21 | 18 | 18 | 241 | 190 | 163 | 75  | 97  | 89  |
| SMMPA00889 | 14 | 11 | 4  | 45  | 46  | 35  | 24  | 31  | 33  |
| SMMPA00890 | 25 | 28 | 27 | 32  | 27  | 29  | 23  | 34  | 21  |
| SMMPA00891 | 14 | 12 | 15 | 156 | 138 | 109 | 78  | 104 | 113 |
| SMMPA00892 | 26 | 31 | 21 | 135 | 109 | 98  | 60  | 71  | 74  |
| SMMPA00893 | 5  | 3  | 3  | 22  | 14  | 11  | 8   | 13  | 19  |
| SMMPA00894 | 15 | 12 | 14 | 20  | 20  | 20  | 22  | 28  | 29  |
| SMMPA00895 | 11 | 14 | 23 | 32  | 38  | 29  | 15  | 29  | 34  |
| SMMPA00896 | 11 | 13 | 8  | 46  | 32  | 34  | 14  | 25  | 20  |
| SMMPA00897 | 12 | 9  | 9  | 62  | 43  | 25  | 38  | 44  | 36  |
| SMMPA00898 | 14 | 14 | 14 | 17  | 15  | 20  | 20  | 28  | 15  |
| SMMPA00899 | 9  | 10 | 6  | 5   | 3   | 6   | 7   | 9   | 7   |
| SMMPA00900 | 8  | 8  | 8  | 23  | 8   | 11  | 11  | 9   | 13  |
| SMMPA00901 | 5  | 3  | 3  | 3   | 5   | 5   | 10  | 12  | 14  |
| SMMPA00902 | 20 | 22 | 22 | 136 | 120 | 104 | 70  | 71  | 82  |
| SMMPA00903 | 31 | 24 | 26 | 408 | 361 | 270 | 164 | 186 | 163 |
| SMMPA00904 | 48 | 31 | 41 | 52  | 44  | 45  | 50  | 59  | 60  |
| SMMPA00905 | 15 | 16 | 13 | 15  | 16  | 15  | 17  | 26  | 25  |

|            |    |    |    |     |     |     |     |     |     |
|------------|----|----|----|-----|-----|-----|-----|-----|-----|
| SMMPA00906 | 21 | 15 | 16 | 58  | 51  | 60  | 25  | 51  | 32  |
| SMMPA00907 | 22 | 14 | 16 | 10  | 17  | 12  | 21  | 26  | 19  |
| SMMPA00908 | 31 | 22 | 38 | 286 | 272 | 211 | 140 | 191 | 178 |
| SMMPA00909 | 19 | 19 | 25 | 33  | 23  | 20  | 26  | 43  | 23  |
| SMMPA00910 | 28 | 31 | 16 | 76  | 63  | 56  | 43  | 38  | 49  |
| SMMPA00911 | 10 | 14 | 12 | 38  | 39  | 28  | 18  | 14  | 18  |
| SMMPA00912 | 13 | 7  | 15 | 295 | 324 | 252 | 167 | 186 | 152 |
| SMMPA00913 | 9  | 15 | 11 | 335 | 266 | 241 | 172 | 195 | 153 |
| SMMPA00914 | 27 | 20 | 26 | 74  | 59  | 53  | 34  | 55  | 47  |
| SMMPA00915 | 6  | 7  | 5  | 15  | 16  | 13  | 10  | 12  | 10  |
| SMMPA00916 | 24 | 18 | 16 | 35  | 23  | 26  | 15  | 38  | 27  |
| SMMPA00917 | 8  | 11 | 6  | 25  | 32  | 24  | 19  | 21  | 20  |
| SMMPA00918 | 10 | 12 | 7  | 17  | 11  | 15  | 14  | 17  | 14  |
| SMMPA00919 | 21 | 30 | 22 | 42  | 54  | 35  | 29  | 45  | 39  |
| SMMPA00920 | 19 | 16 | 16 | 23  | 18  | 10  | 14  | 16  | 17  |
| SMMPA00921 | 17 | 13 | 13 | 30  | 31  | 22  | 11  | 30  | 22  |
| SMMPA00922 | 19 | 24 | 30 | 448 | 420 | 372 | 164 | 207 | 190 |
| SMMPA00923 | 25 | 21 | 11 | 38  | 35  | 29  | 21  | 33  | 32  |
| SMMPA00924 | 18 | 10 | 15 | 94  | 99  | 84  | 50  | 73  | 62  |
| SMMPA00925 | 28 | 31 | 29 | 204 | 183 | 181 | 65  | 112 | 80  |
| SMMPA00926 | 15 | 15 | 15 | 28  | 35  | 25  | 19  | 30  | 29  |
| SMMPA00927 | 14 | 17 | 19 | 34  | 23  | 32  | 27  | 35  | 37  |
| SMMPA00928 | 33 | 37 | 26 | 55  | 39  | 32  | 32  | 39  | 51  |
| SMMPA00929 | 22 | 24 | 18 | 212 | 157 | 150 | 77  | 86  | 68  |
| SMMPA00930 | 18 | 13 | 25 | 29  | 53  | 40  | 31  | 38  | 39  |
| SMMPA00931 | 15 | 21 | 23 | 21  | 18  | 23  | 16  | 33  | 30  |
| SMMPA00932 | 18 | 13 | 13 | 17  | 21  | 16  | 20  | 33  | 28  |
| SMMPA00933 | 20 | 13 | 17 | 52  | 30  | 28  | 26  | 24  | 28  |
| SMMPA00934 | 29 | 27 | 38 | 97  | 78  | 58  | 53  | 39  | 63  |
| SMMPA00935 | 23 | 20 | 24 | 72  | 92  | 69  | 45  | 55  | 56  |
| SMMPA00936 | 11 | 26 | 17 | 42  | 37  | 44  | 24  | 19  | 27  |
| SMMPA00937 | 10 | 13 | 14 | 14  | 11  | 13  | 12  | 15  | 17  |
| SMMPA00938 | 37 | 26 | 15 | 31  | 38  | 27  | 27  | 32  | 35  |
| SMMPA00939 | 19 | 16 | 22 | 20  | 18  | 18  | 15  | 21  | 19  |
| SMMPA00940 | 21 | 40 | 24 | 34  | 34  | 44  | 26  | 38  | 36  |
| SMMPA00941 | 8  | 7  | 18 | 32  | 24  | 29  | 14  | 19  | 18  |
| SMMPA00942 | 8  | 10 | 7  | 10  | 11  | 8   | 13  | 17  | 12  |
| SMMPA00943 | 19 | 20 | 20 | 44  | 25  | 22  | 26  | 23  | 30  |
| SMMPA00944 | 15 | 14 | 16 | 11  | 11  | 14  | 6   | 17  | 22  |
| SMMPA00945 | 13 | 20 | 13 | 39  | 34  | 29  | 18  | 15  | 21  |
| SMMPA00946 | 29 | 28 | 22 | 256 | 200 | 145 | 98  | 133 | 119 |



|            |    |    |    |      |      |      |     |     |     |
|------------|----|----|----|------|------|------|-----|-----|-----|
| SMMPA00947 | 19 | 12 | 24 | 252  | 259  | 219  | 129 | 129 | 129 |
| SMMPA00948 | 28 | 29 | 24 | 25   | 32   | 19   | 32  | 32  | 33  |
| SMMPA00949 | 12 | 10 | 11 | 14   | 19   | 15   | 9   | 15  | 17  |
| SMMPA00950 | 35 | 18 | 22 | 43   | 37   | 28   | 25  | 38  | 35  |
| SMMPA00951 | 26 | 21 | 27 | 14   | 9    | 11   | 22  | 32  | 17  |
| SMMPA00952 | 11 | 13 | 19 | 44   | 46   | 32   | 18  | 35  | 24  |
| SMMPA00953 | 10 | 14 | 18 | 24   | 21   | 20   | 23  | 32  | 34  |
| SMMPA00954 | 9  | 11 | 5  | 301  | 279  | 249  | 177 | 243 | 224 |
| SMMPA00955 | 16 | 15 | 13 | 41   | 38   | 34   | 28  | 38  | 29  |
| SMMPA00956 | 22 | 13 | 19 | 21   | 14   | 9    | 11  | 28  | 23  |
| SMMPA00957 | 13 | 17 | 11 | 44   | 31   | 23   | 31  | 38  | 36  |
| SMMPA00958 | 28 | 34 | 30 | 128  | 111  | 124  | 52  | 55  | 54  |
| SMMPA00959 | 16 | 14 | 21 | 27   | 37   | 16   | 23  | 37  | 32  |
| SMMPA00960 | 1  | 7  | 15 | 381  | 348  | 343  | 214 | 354 | 267 |
| SMMPA00961 | 19 | 32 | 22 | 379  | 399  | 321  | 130 | 167 | 143 |
| SMMPA00962 | 17 | 16 | 16 | 54   | 40   | 41   | 28  | 29  | 43  |
| SMMPA00963 | 27 | 26 | 20 | 76   | 59   | 67   | 47  | 53  | 40  |
| SMMPA00964 | 17 | 7  | 13 | 27   | 16   | 16   | 20  | 24  | 19  |
| SMMPA00965 | 11 | 12 | 3  | 12   | 8    | 6    | 9   | 10  | 14  |
| SMMPA00966 | 33 | 33 | 32 | 134  | 124  | 113  | 71  | 85  | 82  |
| SMMPA00967 | 17 | 20 | 21 | 294  | 247  | 181  | 94  | 133 | 134 |
| SMMPA00968 | 23 | 35 | 15 | 414  | 390  | 281  | 142 | 209 | 182 |
| SMMPA00969 | 23 | 18 | 11 | 43   | 47   | 26   | 23  | 32  | 27  |
| SMMPA00970 | 13 | 14 | 14 | 173  | 173  | 131  | 71  | 79  | 56  |
| SMMPA00971 | 26 | 34 | 32 | 173  | 195  | 137  | 70  | 101 | 89  |
| SMMPA00972 | 14 | 15 | 8  | 27   | 27   | 16   | 23  | 37  | 29  |
| SMMPA00973 | 10 | 16 | 8  | 129  | 139  | 121  | 57  | 57  | 60  |
| SMMPA00974 | 20 | 24 | 24 | 103  | 68   | 51   | 51  | 63  | 52  |
| SMMPA00975 | 22 | 19 | 17 | 20   | 25   | 25   | 19  | 33  | 32  |
| SMMPA00976 | 24 | 19 | 19 | 108  | 101  | 81   | 33  | 53  | 40  |
| SMMPA00977 | 20 | 22 | 18 | 91   | 79   | 56   | 29  | 54  | 39  |
| SMMPA00978 | 39 | 39 | 30 | 243  | 196  | 166  | 71  | 96  | 85  |
| SMMPA00979 | 27 | 13 | 20 | 48   | 41   | 45   | 33  | 19  | 38  |
| SMMPA00980 | 19 | 23 | 18 | 202  | 185  | 162  | 101 | 115 | 109 |
| SMMPA00981 | 14 | 13 | 10 | 21   | 20   | 18   | 21  | 22  | 22  |
| SMMPA00982 | 23 | 28 | 24 | 1202 | 1110 | 1028 | 651 | 846 | 795 |
| SMMPA00983 | 15 | 10 | 9  | 7    | 14   | 9    | 13  | 13  | 18  |
| SMMPA00984 | 17 | 14 | 15 | 42   | 21   | 22   | 29  | 41  | 41  |
| SMMPA00985 | 19 | 13 | 7  | 12   | 17   | 12   | 17  | 17  | 31  |
| SMMPA00986 | 11 | 3  | 8  | 7    | 10   | 8    | 8   | 13  | 6   |
| SMMPA00987 | 9  | 4  | 10 | 58   | 42   | 31   | 14  | 18  | 21  |

|            |    |    |    |     |     |     |     |     |     |
|------------|----|----|----|-----|-----|-----|-----|-----|-----|
| SMMPA00988 | 18 | 23 | 19 | 67  | 60  | 58  | 33  | 38  | 32  |
| SMMPA00989 | 10 | 13 | 21 | 26  | 18  | 14  | 21  | 24  | 26  |
| SMMPA00990 | 24 | 34 | 29 | 555 | 495 | 380 | 149 | 196 | 165 |
| SMMPA00991 | 17 | 23 | 12 | 28  | 20  | 17  | 12  | 38  | 26  |
| SMMPA00992 | 17 | 13 | 17 | 573 | 471 | 446 | 181 | 234 | 195 |
| SMMPA00993 | 6  | 7  | 7  | 36  | 22  | 23  | 13  | 15  | 13  |
| SMMPA00994 | 15 | 7  | 13 | 17  | 21  | 12  | 10  | 20  | 19  |
| SMMPA00995 | 46 | 37 | 35 | 51  | 43  | 38  | 43  | 64  | 50  |
| SMMPA00996 | 6  | 6  | 3  | 124 | 97  | 103 | 80  | 85  | 67  |
| SMMPA00997 | 33 | 32 | 21 | 57  | 25  | 41  | 26  | 37  | 43  |
| SMMPA00998 | 15 | 18 | 15 | 125 | 118 | 79  | 36  | 41  | 44  |
| SMMPA00999 | 14 | 13 | 14 | 28  | 21  | 29  | 30  | 29  | 29  |
| SMMPA01000 | 14 | 10 | 11 | 155 | 134 | 104 | 76  | 88  | 71  |
| SMMPA01001 | 23 | 15 | 19 | 39  | 48  | 34  | 29  | 42  | 35  |
| SMMPA01002 | 13 | 31 | 28 | 84  | 60  | 68  | 36  | 42  | 53  |
| SMMPA01003 | 12 | 27 | 20 | 99  | 87  | 75  | 58  | 86  | 54  |
| SMMPA01004 | 25 | 24 | 29 | 25  | 24  | 16  | 27  | 43  | 32  |
| SMMPA01005 | 6  | 10 | 6  | 13  | 17  | 12  | 13  | 11  | 13  |
| SMMPA01006 | 25 | 33 | 17 | 51  | 54  | 36  | 39  | 48  | 50  |
| SMMPA01007 | 17 | 24 | 20 | 32  | 19  | 31  | 26  | 39  | 38  |
| SMMPA01008 | 27 | 17 | 18 | 42  | 33  | 33  | 26  | 48  | 39  |
| SMMPA01009 | 29 | 17 | 13 | 61  | 58  | 46  | 23  | 27  | 34  |
| SMMPA01010 | 22 | 23 | 20 | 279 | 275 | 195 | 77  | 135 | 100 |
| SMMPA01011 | 13 | 8  | 16 | 21  | 22  | 20  | 13  | 18  | 13  |
| SMMPA01012 | 17 | 20 | 25 | 68  | 62  | 48  | 28  | 51  | 43  |
| SMMPA01013 | 12 | 15 | 16 | 15  | 8   | 15  | 17  | 14  | 20  |
| SMMPA01014 | 22 | 22 | 18 | 63  | 46  | 26  | 31  | 36  | 28  |
| SMMPA01015 | 28 | 16 | 22 | 71  | 81  | 62  | 40  | 51  | 28  |
| SMMPA01016 | 19 | 21 | 36 | 24  | 30  | 31  | 15  | 24  | 22  |
| SMMPA01017 | 26 | 18 | 17 | 253 | 236 | 227 | 120 | 129 | 132 |
| SMMPA01018 | 5  | 6  | 1  | 0   | 0   | 0   | 2   | 4   | 0   |
| SMMPA01019 | 11 | 8  | 14 | 18  | 7   | 20  | 10  | 19  | 12  |
| SMMPA01020 | 13 | 7  | 8  | 12  | 18  | 16  | 15  | 16  | 19  |
| SMMPA01021 | 24 | 19 | 27 | 450 | 447 | 363 | 132 | 191 | 177 |
| SMMPA01022 | 14 | 11 | 10 | 17  | 17  | 12  | 19  | 22  | 15  |
| SMMPA01023 | 11 | 3  | 15 | 24  | 20  | 15  | 13  | 16  | 16  |
| SMMPA01024 | 8  | 12 | 7  | 17  | 24  | 10  | 18  | 13  | 21  |
| SMMPA01025 | 8  | 11 | 14 | 21  | 19  | 15  | 10  | 22  | 22  |
| SMMPA01026 | 9  | 13 | 5  | 25  | 34  | 19  | 14  | 28  | 13  |
| SMMPA01027 | 14 | 18 | 19 | 27  | 16  | 20  | 17  | 22  | 17  |
| SMMPA01028 | 8  | 20 | 19 | 41  | 34  | 31  | 23  | 40  | 33  |

|            |    |    |    |     |     |     |     |     |     |
|------------|----|----|----|-----|-----|-----|-----|-----|-----|
| SMMPA01029 | 32 | 28 | 31 | 106 | 100 | 78  | 42  | 60  | 63  |
| SMMPA01030 | 16 | 17 | 11 | 50  | 41  | 32  | 25  | 27  | 28  |
| SMMPA01031 | 12 | 16 | 15 | 211 | 174 | 176 | 78  | 104 | 76  |
| SMMPA01032 | 9  | 9  | 14 | 24  | 22  | 14  | 10  | 13  | 11  |
| SMMPA01033 | 15 | 16 | 13 | 27  | 32  | 29  | 17  | 19  | 30  |
| SMMPA01034 | 14 | 20 | 18 | 17  | 19  | 16  | 18  | 22  | 18  |
| SMMPA01035 | 12 | 17 | 13 | 54  | 49  | 53  | 36  | 36  | 31  |
| SMMPA01036 | 23 | 25 | 41 | 47  | 38  | 40  | 38  | 46  | 51  |
| SMMPA01037 | 12 | 7  | 7  | 31  | 14  | 20  | 12  | 18  | 10  |
| SMMPA01038 | 33 | 24 | 19 | 57  | 60  | 46  | 34  | 40  | 50  |
| SMMPA01039 | 19 | 17 | 22 | 50  | 39  | 32  | 29  | 25  | 32  |
| SMMPA01040 | 10 | 16 | 14 | 591 | 544 | 492 | 239 | 303 | 252 |
| SMMPA01041 | 17 | 20 | 18 | 76  | 45  | 47  | 25  | 43  | 32  |
| SMMPA01042 | 9  | 5  | 3  | 37  | 43  | 39  | 11  | 24  | 19  |
| SMMPA01043 | 13 | 13 | 9  | 102 | 76  | 62  | 38  | 52  | 44  |
| SMMPA01044 | 19 | 18 | 8  | 73  | 84  | 53  | 31  | 46  | 39  |
| SMMPA01045 | 14 | 15 | 13 | 58  | 39  | 43  | 18  | 27  | 31  |
| SMMPA01046 | 17 | 16 | 12 | 302 | 252 | 211 | 131 | 137 | 145 |
| SMMPA01047 | 6  | 3  | 7  | 6   | 6   | 5   | 7   | 10  | 6   |
| SMMPA01048 | 26 | 15 | 23 | 82  | 61  | 51  | 51  | 57  | 46  |
| SMMPA01049 | 25 | 22 | 29 | 70  | 42  | 44  | 39  | 53  | 38  |
| SMMPA01050 | 11 | 11 | 8  | 48  | 47  | 39  | 21  | 28  | 30  |
| SMMPA01051 | 17 | 17 | 13 | 39  | 46  | 23  | 20  | 18  | 26  |
| SMMPA01052 | 9  | 5  | 8  | 12  | 15  | 16  | 8   | 13  | 10  |
| SMMPA01053 | 17 | 8  | 13 | 48  | 69  | 61  | 22  | 39  | 36  |
| SMMPA01054 | 9  | 5  | 12 | 6   | 3   | 12  | 8   | 10  | 8   |
| SMMPA01055 | 20 | 24 | 26 | 41  | 27  | 30  | 15  | 39  | 24  |
| SMMPA01056 | 19 | 18 | 20 | 53  | 56  | 29  | 22  | 36  | 31  |
| SMMPA01057 | 11 | 10 | 10 | 88  | 88  | 76  | 53  | 81  | 61  |
| SMMPA01058 | 16 | 18 | 16 | 57  | 62  | 43  | 30  | 41  | 39  |
| SMMPA01059 | 3  | 3  | 6  | 100 | 79  | 56  | 40  | 60  | 52  |
| SMMPA01060 | 15 | 19 | 16 | 18  | 17  | 9   | 11  | 26  | 20  |
| SMMPA01061 | 7  | 3  | 6  | 199 | 177 | 162 | 111 | 129 | 119 |
| SMMPA01062 | 13 | 12 | 7  | 40  | 20  | 27  | 26  | 22  | 27  |
| SMMPA01063 | 6  | 15 | 10 | 16  | 13  | 13  | 14  | 15  | 20  |
| SMMPA01064 | 18 | 18 | 12 | 121 | 112 | 85  | 40  | 60  | 50  |
| SMMPA01065 | 35 | 24 | 22 | 85  | 72  | 50  | 44  | 52  | 58  |
| SMMPA01066 | 11 | 18 | 10 | 32  | 32  | 25  | 30  | 34  | 35  |
| SMMPA01067 | 15 | 26 | 26 | 81  | 85  | 52  | 34  | 53  | 46  |
| SMMPA01068 | 16 | 9  | 11 | 42  | 39  | 26  | 19  | 26  | 18  |
| SMMPA01069 | 17 | 11 | 5  | 13  | 10  | 12  | 15  | 19  | 10  |

|            |    |    |    |     |     |     |     |     |     |
|------------|----|----|----|-----|-----|-----|-----|-----|-----|
| SMMPA01070 | 23 | 32 | 28 | 106 | 90  | 80  | 68  | 91  | 93  |
| SMMPA01071 | 9  | 10 | 11 | 132 | 135 | 103 | 54  | 57  | 50  |
| SMMPA01072 | 41 | 43 | 37 | 44  | 42  | 39  | 29  | 34  | 31  |
| SMMPA01073 | 25 | 15 | 15 | 46  | 42  | 43  | 27  | 35  | 35  |
| SMMPA01074 | 18 | 20 | 22 | 125 | 105 | 93  | 47  | 84  | 79  |
| SMMPA01075 | 32 | 40 | 31 | 92  | 119 | 91  | 40  | 66  | 57  |
| SMMPA01076 | 29 | 13 | 11 | 22  | 41  | 27  | 18  | 35  | 22  |
| SMMPA01077 | 25 | 22 | 20 | 145 | 111 | 94  | 49  | 80  | 69  |
| SMMPA01078 | 12 | 13 | 19 | 24  | 17  | 12  | 12  | 21  | 22  |
| SMMPA01079 | 9  | 16 | 10 | 60  | 53  | 50  | 26  | 57  | 37  |
| SMMPA01080 | 24 | 21 | 20 | 158 | 120 | 113 | 59  | 95  | 89  |
| SMMPA01081 | 31 | 24 | 29 | 348 | 311 | 252 | 175 | 236 | 206 |
| SMMPA01082 | 34 | 36 | 33 | 77  | 63  | 81  | 52  | 63  | 68  |
| SMMPA01083 | 9  | 9  | 10 | 125 | 99  | 71  | 36  | 49  | 53  |
| SMMPA01084 | 12 | 16 | 17 | 70  | 66  | 53  | 27  | 37  | 38  |
| SMMPA01085 | 34 | 38 | 24 | 69  | 74  | 68  | 42  | 51  | 54  |
| SMMPA01086 | 4  | 8  | 5  | 37  | 27  | 17  | 20  | 23  | 24  |
| SMMPA01087 | 5  | 5  | 4  | 8   | 11  | 6   | 20  | 14  | 8   |
| SMMPA01088 | 18 | 19 | 21 | 166 | 156 | 128 | 48  | 77  | 70  |
| SMMPA01089 | 13 | 8  | 7  | 23  | 22  | 29  | 18  | 25  | 20  |
| SMMPA01090 | 14 | 11 | 9  | 108 | 91  | 68  | 53  | 57  | 46  |
| SMMPA01091 | 23 | 19 | 33 | 64  | 59  | 45  | 31  | 55  | 34  |
| SMMPA01092 | 8  | 10 | 16 | 59  | 72  | 49  | 27  | 24  | 26  |
| SMMPA01093 | 6  | 17 | 4  | 253 | 206 | 149 | 60  | 126 | 110 |
| SMMPA01094 | 5  | 7  | 7  | 30  | 31  | 33  | 18  | 25  | 25  |
| SMMPA01095 | 27 | 31 | 35 | 95  | 122 | 88  | 49  | 95  | 78  |
| SMMPA01096 | 27 | 30 | 19 | 112 | 123 | 63  | 56  | 65  | 68  |
| SMMPA01097 | 15 | 20 | 18 | 43  | 41  | 36  | 36  | 37  | 37  |
| SMMPA01098 | 10 | 11 | 12 | 37  | 27  | 30  | 37  | 32  | 29  |
| SMMPA01099 | 17 | 14 | 11 | 49  | 50  | 49  | 25  | 29  | 33  |
| SMMPA01100 | 23 | 28 | 21 | 25  | 26  | 31  | 23  | 28  | 27  |
| SMMPA01101 | 7  | 3  | 5  | 215 | 193 | 160 | 107 | 105 | 120 |
| SMMPA01102 | 16 | 14 | 18 | 64  | 59  | 50  | 30  | 50  | 39  |
| SMMPA01103 | 6  | 4  | 5  | 122 | 150 | 90  | 69  | 71  | 48  |
| SMMPA01104 | 15 | 18 | 21 | 33  | 34  | 27  | 17  | 30  | 27  |
| SMMPA01105 | 19 | 14 | 21 | 286 | 269 | 194 | 72  | 117 | 92  |
| SMMPA01106 | 9  | 11 | 14 | 103 | 82  | 63  | 35  | 42  | 45  |
| SMMPA01107 | 13 | 10 | 10 | 118 | 95  | 77  | 41  | 57  | 39  |
| SMMPA01108 | 11 | 6  | 8  | 18  | 19  | 20  | 19  | 29  | 24  |
| SMMPA01109 | 14 | 16 | 12 | 63  | 54  | 52  | 28  | 39  | 47  |
| SMMPA01110 | 9  | 8  | 9  | 16  | 9   | 17  | 16  | 13  | 16  |

|            |    |    |    |      |      |     |     |     |     |
|------------|----|----|----|------|------|-----|-----|-----|-----|
| SMMPA01111 | 14 | 25 | 19 | 15   | 14   | 20  | 26  | 41  | 36  |
| SMMPA01112 | 14 | 13 | 10 | 28   | 29   | 26  | 22  | 41  | 26  |
| SMMPA01113 | 11 | 10 | 7  | 41   | 22   | 23  | 18  | 30  | 16  |
| SMMPA01114 | 16 | 13 | 10 | 44   | 25   | 32  | 22  | 24  | 32  |
| SMMPA01115 | 20 | 27 | 24 | 123  | 127  | 83  | 53  | 76  | 56  |
| SMMPA01116 | 18 | 17 | 17 | 309  | 259  | 205 | 136 | 153 | 146 |
| SMMPA01117 | 23 | 23 | 30 | 25   | 25   | 21  | 30  | 34  | 33  |
| SMMPA01118 | 34 | 28 | 35 | 296  | 273  | 233 | 99  | 179 | 124 |
| SMMPA01119 | 12 | 17 | 13 | 315  | 308  | 249 | 122 | 172 | 141 |
| SMMPA01120 | 22 | 26 | 33 | 92   | 69   | 59  | 60  | 63  | 66  |
| SMMPA01121 | 23 | 27 | 21 | 42   | 27   | 35  | 27  | 25  | 16  |
| SMMPA01122 | 17 | 16 | 23 | 170  | 113  | 137 | 72  | 103 | 94  |
| SMMPA01123 | 8  | 9  | 8  | 36   | 20   | 26  | 26  | 30  | 24  |
| SMMPA01124 | 12 | 17 | 18 | 84   | 74   | 66  | 42  | 44  | 46  |
| SMMPA01125 | 26 | 17 | 9  | 653  | 578  | 540 | 245 | 339 | 284 |
| SMMPA01126 | 20 | 14 | 25 | 193  | 176  | 156 | 53  | 70  | 82  |
| SMMPA01127 | 19 | 18 | 18 | 38   | 32   | 25  | 25  | 47  | 40  |
| SMMPA01128 | 22 | 26 | 24 | 28   | 25   | 43  | 15  | 20  | 10  |
| SMMPA01129 | 14 | 19 | 8  | 89   | 73   | 61  | 33  | 53  | 52  |
| SMMPA01130 | 57 | 68 | 67 | 1155 | 1024 | 854 | 376 | 428 | 392 |
| SMMPA01131 | 16 | 12 | 8  | 80   | 68   | 59  | 30  | 57  | 49  |
| SMMPA01132 | 22 | 18 | 15 | 27   | 28   | 16  | 10  | 24  | 21  |
| SMMPA01133 | 25 | 24 | 28 | 44   | 34   | 32  | 34  | 32  | 30  |
| SMMPA01134 | 23 | 25 | 28 | 213  | 205  | 160 | 98  | 132 | 133 |
| SMMPA01135 | 7  | 14 | 14 | 176  | 158  | 103 | 57  | 88  | 96  |
| SMMPA01136 | 18 | 20 | 18 | 30   | 43   | 41  | 31  | 38  | 36  |
| SMMPA01137 | 13 | 18 | 17 | 82   | 58   | 43  | 32  | 53  | 46  |
| SMMPA01138 | 24 | 30 | 27 | 139  | 130  | 87  | 38  | 57  | 45  |
| SMMPA01139 | 17 | 14 | 8  | 41   | 34   | 31  | 29  | 33  | 23  |
| SMMPA01140 | 21 | 13 | 22 | 106  | 87   | 64  | 47  | 56  | 45  |
| SMMPA01141 | 14 | 8  | 5  | 43   | 31   | 35  | 26  | 31  | 29  |
| SMMPA01142 | 15 | 27 | 23 | 92   | 74   | 67  | 58  | 65  | 50  |
| SMMPA01143 | 7  | 17 | 12 | 29   | 38   | 33  | 33  | 34  | 28  |
| SMMPA01144 | 23 | 18 | 22 | 24   | 15   | 26  | 21  | 34  | 29  |
| SMMPA01145 | 17 | 18 | 16 | 29   | 36   | 39  | 23  | 22  | 26  |
| SMMPA01146 | 16 | 17 | 9  | 208  | 194  | 166 | 87  | 127 | 102 |
| SMMPA01147 | 12 | 11 | 15 | 241  | 219  | 200 | 178 | 187 | 198 |
| SMMPA01148 | 5  | 12 | 5  | 10   | 14   | 12  | 9   | 11  | 13  |
| SMMPA01149 | 29 | 38 | 19 | 67   | 57   | 42  | 35  | 43  | 47  |
| SMMPA01150 | 15 | 11 | 11 | 47   | 52   | 36  | 44  | 55  | 46  |
| SMMPA01151 | 20 | 15 | 18 | 49   | 46   | 37  | 30  | 30  | 48  |

|            |    |    |    |     |     |     |     |     |     |
|------------|----|----|----|-----|-----|-----|-----|-----|-----|
| SMMPA01152 | 24 | 33 | 44 | 128 | 118 | 117 | 58  | 87  | 78  |
| SMMPA01153 | 17 | 21 | 11 | 79  | 75  | 76  | 36  | 61  | 54  |
| SMMPA01154 | 11 | 4  | 10 | 194 | 173 | 137 | 79  | 113 | 89  |
| SMMPA01155 | 17 | 21 | 21 | 25  | 32  | 15  | 18  | 25  | 18  |
| SMMPA01156 | 3  | 4  | 3  | 7   | 10  | 9   | 8   | 11  | 19  |
| SMMPA01157 | 11 | 9  | 15 | 189 | 176 | 144 | 81  | 131 | 107 |
| SMMPA01158 | 22 | 22 | 26 | 575 | 605 | 531 | 200 | 250 | 206 |
| SMMPA01159 | 11 | 6  | 14 | 37  | 38  | 32  | 12  | 22  | 16  |
| SMMPA01160 | 18 | 10 | 13 | 27  | 27  | 34  | 27  | 30  | 23  |
| SMMPA01161 | 13 | 12 | 10 | 29  | 47  | 43  | 11  | 17  | 19  |
| SMMPA01162 | 44 | 46 | 27 | 232 | 252 | 192 | 106 | 139 | 115 |
| SMMPA01163 | 40 | 39 | 35 | 46  | 38  | 25  | 30  | 38  | 44  |
| SMMPA01164 | 3  | 9  | 6  | 40  | 50  | 33  | 20  | 23  | 24  |
| SMMPA01165 | 6  | 8  | 10 | 132 | 116 | 83  | 48  | 60  | 54  |
| SMMPA01166 | 6  | 18 | 9  | 17  | 13  | 15  | 8   | 19  | 13  |
| SMMPA01167 | 25 | 18 | 20 | 44  | 30  | 24  | 29  | 48  | 30  |
| SMMPA01168 | 9  | 4  | 4  | 42  | 37  | 30  | 24  | 35  | 41  |
| SMMPA01169 | 36 | 23 | 37 | 67  | 57  | 47  | 40  | 46  | 40  |
| SMMPA01170 | 16 | 25 | 26 | 16  | 20  | 17  | 25  | 20  | 18  |
| SMMPA01171 | 27 | 30 | 23 | 237 | 205 | 153 | 105 | 134 | 135 |
| SMMPA01172 | 11 | 11 | 9  | 130 | 113 | 101 | 56  | 62  | 55  |
| SMMPA01173 | 19 | 18 | 18 | 134 | 125 | 85  | 72  | 88  | 60  |
| SMMPA01174 | 17 | 14 | 10 | 67  | 61  | 43  | 33  | 51  | 28  |
| SMMPA01175 | 29 | 38 | 27 | 70  | 58  | 45  | 46  | 39  | 43  |
| SMMPA01176 | 13 | 25 | 10 | 16  | 10  | 17  | 20  | 20  | 11  |
| SMMPA01177 | 5  | 15 | 4  | 193 | 180 | 139 | 82  | 92  | 80  |
| SMMPA01178 | 12 | 24 | 21 | 26  | 41  | 29  | 12  | 25  | 13  |
| SMMPA01179 | 6  | 7  | 11 | 39  | 49  | 31  | 18  | 28  | 28  |
| SMMPA01180 | 11 | 14 | 16 | 120 | 109 | 121 | 44  | 46  | 55  |
| SMMPA01181 | 33 | 19 | 27 | 35  | 38  | 44  | 28  | 40  | 40  |
| SMMPA01182 | 8  | 12 | 7  | 81  | 76  | 51  | 38  | 56  | 43  |
| SMMPA01183 | 16 | 23 | 18 | 21  | 30  | 30  | 22  | 31  | 28  |
| SMMPA01184 | 16 | 13 | 15 | 26  | 18  | 21  | 18  | 22  | 28  |
| SMMPA01185 | 8  | 5  | 8  | 10  | 25  | 19  | 5   | 9   | 11  |
| SMMPA01186 | 7  | 7  | 7  | 78  | 64  | 46  | 37  | 54  | 33  |
| SMMPA01187 | 17 | 7  | 14 | 78  | 68  | 50  | 51  | 43  | 33  |
| SMMPA01188 | 23 | 17 | 19 | 112 | 105 | 98  | 40  | 59  | 46  |
| SMMPA01189 | 15 | 19 | 20 | 29  | 34  | 20  | 16  | 25  | 21  |
| SMMPA01190 | 11 | 11 | 11 | 43  | 49  | 39  | 36  | 26  | 26  |
| SMMPA01191 | 17 | 24 | 21 | 40  | 39  | 33  | 24  | 39  | 36  |
| SMMPA01192 | 9  | 8  | 5  | 20  | 19  | 13  | 16  | 12  | 19  |

|            |    |    |    |     |     |     |     |     |     |
|------------|----|----|----|-----|-----|-----|-----|-----|-----|
| SMMPA01193 | 34 | 31 | 29 | 175 | 151 | 124 | 68  | 84  | 74  |
| SMMPA01194 | 3  | 3  | 5  | 15  | 6   | 16  | 11  | 3   | 15  |
| SMMPA01195 | 13 | 10 | 7  | 75  | 61  | 48  | 26  | 39  | 44  |
| SMMPA01196 | 25 | 22 | 20 | 28  | 30  | 32  | 23  | 40  | 33  |
| SMMPA01197 | 17 | 20 | 24 | 116 | 109 | 104 | 55  | 73  | 39  |
| SMMPA01198 | 22 | 25 | 20 | 27  | 29  | 31  | 26  | 23  | 32  |
| SMMPA01199 | 8  | 8  | 8  | 257 | 228 | 179 | 105 | 153 | 128 |
| SMMPA01200 | 22 | 20 | 11 | 49  | 46  | 33  | 27  | 32  | 47  |
| SMMPA01201 | 18 | 24 | 15 | 75  | 70  | 52  | 25  | 52  | 35  |
| SMMPA01202 | 11 | 15 | 13 | 77  | 84  | 54  | 30  | 35  | 32  |
| SMMPA01203 | 22 | 17 | 17 | 40  | 30  | 33  | 30  | 36  | 33  |
| SMMPA01204 | 30 | 19 | 21 | 132 | 120 | 101 | 45  | 68  | 66  |
| SMMPA01205 | 15 | 15 | 21 | 80  | 73  | 45  | 28  | 35  | 29  |
| SMMPA01206 | 10 | 8  | 9  | 85  | 67  | 49  | 29  | 52  | 41  |
| SMMPA01207 | 11 | 4  | 17 | 69  | 64  | 48  | 30  | 40  | 35  |
| SMMPA01208 | 39 | 35 | 56 | 205 | 187 | 161 | 84  | 113 | 118 |
| SMMPA01209 | 7  | 21 | 9  | 99  | 104 | 94  | 63  | 92  | 88  |
| SMMPA01210 | 11 | 15 | 26 | 60  | 46  | 41  | 39  | 41  | 50  |
| SMMPA01211 | 17 | 15 | 14 | 37  | 38  | 41  | 40  | 32  | 23  |
| SMMPA01212 | 14 | 17 | 7  | 26  | 33  | 19  | 18  | 28  | 21  |
| SMMPA01213 | 11 | 12 | 5  | 21  | 25  | 18  | 13  | 19  | 17  |
| SMMPA01214 | 20 | 24 | 19 | 299 | 298 | 216 | 110 | 132 | 135 |
| SMMPA01215 | 15 | 8  | 11 | 13  | 29  | 18  | 14  | 18  | 19  |
| SMMPA01216 | 19 | 18 | 5  | 60  | 54  | 53  | 25  | 42  | 31  |
| SMMPA01217 | 24 | 32 | 16 | 48  | 35  | 37  | 27  | 29  | 33  |
| SMMPA01218 | 11 | 10 | 8  | 143 | 120 | 99  | 48  | 70  | 46  |
| SMMPA01219 | 13 | 12 | 11 | 76  | 43  | 35  | 24  | 46  | 23  |
| SMMPA01220 | 19 | 17 | 18 | 95  | 115 | 60  | 58  | 63  | 68  |
| SMMPA01221 | 30 | 35 | 32 | 273 | 295 | 216 | 116 | 123 | 134 |
| SMMPA01222 | 26 | 22 | 21 | 399 | 390 | 269 | 132 | 183 | 141 |
| SMMPA01223 | 15 | 21 | 13 | 83  | 89  | 82  | 57  | 47  | 54  |
| SMMPA01224 | 14 | 18 | 11 | 240 | 208 | 164 | 115 | 108 | 111 |
| SMMPA01225 | 11 | 8  | 4  | 31  | 22  | 19  | 17  | 19  | 28  |
| SMMPA01226 | 15 | 9  | 18 | 19  | 14  | 19  | 14  | 21  | 20  |
| SMMPA01227 | 9  | 10 | 12 | 21  | 25  | 17  | 16  | 28  | 23  |
| SMMPA01228 | 50 | 37 | 40 | 78  | 73  | 60  | 50  | 61  | 39  |
| SMMPA01229 | 6  | 7  | 10 | 18  | 9   | 9   | 13  | 17  | 15  |
| SMMPA01230 | 10 | 18 | 14 | 278 | 271 | 223 | 98  | 139 | 133 |
| SMMPA01231 | 8  | 9  | 10 | 17  | 22  | 14  | 12  | 17  | 14  |
| SMMPA01232 | 18 | 20 | 15 | 35  | 24  | 11  | 28  | 26  | 30  |
| SMMPA01233 | 21 | 20 | 26 | 24  | 27  | 33  | 17  | 23  | 27  |

|            |    |    |    |     |     |     |     |     |     |
|------------|----|----|----|-----|-----|-----|-----|-----|-----|
| SMMPA01234 | 8  | 10 | 18 | 33  | 21  | 23  | 14  | 23  | 23  |
| SMMPA01235 | 16 | 15 | 5  | 98  | 80  | 74  | 48  | 66  | 49  |
| SMMPA01236 | 22 | 19 | 10 | 18  | 19  | 15  | 14  | 15  | 24  |
| SMMPA01237 | 21 | 28 | 30 | 586 | 509 | 455 | 288 | 336 | 277 |
| SMMPA01238 | 34 | 23 | 35 | 40  | 45  | 35  | 25  | 43  | 34  |
| SMMPA01239 | 10 | 7  | 7  | 29  | 22  | 23  | 16  | 20  | 26  |
| SMMPA01240 | 29 | 27 | 21 | 205 | 164 | 127 | 94  | 144 | 122 |
| SMMPA01241 | 24 | 19 | 31 | 52  | 61  | 37  | 41  | 56  | 47  |
| SMMPA01242 | 19 | 37 | 18 | 35  | 24  | 25  | 21  | 24  | 21  |
| SMMPA01243 | 63 | 67 | 65 | 124 | 101 | 81  | 65  | 75  | 87  |
| SMMPA01244 | 13 | 14 | 6  | 17  | 17  | 10  | 18  | 24  | 19  |
| SMMPA01245 | 17 | 17 | 6  | 24  | 17  | 15  | 15  | 23  | 18  |
| SMMPA01246 | 21 | 28 | 16 | 313 | 295 | 227 | 111 | 160 | 128 |
| SMMPA01247 | 16 | 17 | 20 | 51  | 39  | 34  | 27  | 36  | 29  |
| SMMPA01248 | 12 | 17 | 13 | 165 | 147 | 129 | 65  | 73  | 95  |
| SMMPA01249 | 19 | 20 | 20 | 199 | 135 | 115 | 76  | 91  | 103 |
| SMMPA01250 | 8  | 12 | 5  | 3   | 7   | 8   | 7   | 13  | 5   |
| SMMPA01251 | 17 | 18 | 14 | 153 | 162 | 110 | 64  | 81  | 85  |
| SMMPA01252 | 22 | 18 | 12 | 140 | 121 | 81  | 48  | 81  | 42  |
| SMMPA01253 | 14 | 8  | 7  | 34  | 29  | 19  | 21  | 26  | 32  |
| SMMPA01254 | 29 | 20 | 21 | 97  | 112 | 79  | 62  | 72  | 68  |
| SMMPA01255 | 8  | 9  | 8  | 71  | 57  | 40  | 35  | 40  | 25  |
| SMMPA01256 | 16 | 13 | 18 | 42  | 49  | 25  | 18  | 26  | 22  |
| SMMPA01257 | 31 | 19 | 18 | 86  | 70  | 51  | 37  | 60  | 40  |
| SMMPA01258 | 11 | 19 | 10 | 21  | 27  | 19  | 21  | 24  | 22  |
| SMMPA01259 | 15 | 20 | 21 | 29  | 30  | 25  | 34  | 40  | 35  |
| SMMPA01260 | 19 | 15 | 17 | 20  | 31  | 32  | 25  | 18  | 27  |
| SMMPA01261 | 20 | 15 | 14 | 55  | 36  | 30  | 31  | 29  | 39  |
| SMMPA01262 | 19 | 23 | 18 | 49  | 39  | 46  | 27  | 45  | 30  |
| SMMPA01263 | 43 | 41 | 43 | 45  | 61  | 53  | 44  | 60  | 50  |
| SMMPA01264 | 19 | 13 | 17 | 36  | 32  | 31  | 25  | 37  | 28  |
| SMMPA01265 | 16 | 21 | 15 | 36  | 40  | 33  | 21  | 27  | 32  |
| SMMPA01266 | 31 | 45 | 26 | 84  | 83  | 72  | 42  | 70  | 75  |
| SMMPA01267 | 23 | 30 | 41 | 88  | 65  | 69  | 43  | 62  | 43  |
| SMMPA01268 | 14 | 18 | 13 | 278 | 235 | 207 | 91  | 134 | 107 |
| SMMPA01269 | 18 | 17 | 10 | 16  | 27  | 20  | 17  | 19  | 16  |
| SMMPA01270 | 11 | 19 | 15 | 24  | 9   | 18  | 10  | 32  | 28  |
| SMMPA01271 | 17 | 14 | 8  | 64  | 58  | 41  | 34  | 47  | 37  |
| SMMPA01272 | 3  | 4  | 3  | 49  | 48  | 35  | 27  | 33  | 27  |
| SMMPA01273 | 8  | 13 | 19 | 16  | 20  | 14  | 13  | 20  | 28  |
| SMMPA01274 | 22 | 28 | 24 | 30  | 29  | 25  | 26  | 30  | 33  |



|            |    |    |    |     |     |     |     |     |     |
|------------|----|----|----|-----|-----|-----|-----|-----|-----|
| SMMPA01275 | 3  | 1  | 4  | 10  | 7   | 5   | 11  | 12  | 17  |
| SMMPA01276 | 18 | 18 | 15 | 323 | 253 | 249 | 122 | 178 | 140 |
| SMMPA01277 | 22 | 28 | 16 | 35  | 32  | 23  | 27  | 33  | 29  |
| SMMPA01278 | 9  | 11 | 9  | 80  | 89  | 65  | 38  | 48  | 76  |
| SMMPA01279 | 36 | 38 | 15 | 48  | 35  | 38  | 33  | 20  | 19  |
| SMMPA01280 | 10 | 12 | 16 | 114 | 104 | 80  | 56  | 68  | 74  |
| SMMPA01281 | 6  | 7  | 5  | 23  | 22  | 14  | 14  | 23  | 10  |
| SMMPA01282 | 23 | 15 | 28 | 57  | 43  | 35  | 30  | 40  | 41  |
| SMMPA01283 | 7  | 5  | 5  | 36  | 17  | 19  | 14  | 11  | 12  |
| SMMPA01284 | 28 | 26 | 31 | 217 | 180 | 165 | 74  | 106 | 95  |
| SMMPA01285 | 11 | 8  | 11 | 38  | 21  | 20  | 12  | 12  | 16  |
| SMMPA01286 | 26 | 24 | 34 | 22  | 30  | 32  | 39  | 39  | 24  |
| SMMPA01287 | 9  | 24 | 23 | 16  | 10  | 12  | 8   | 16  | 32  |
| SMMPA01288 | 21 | 13 | 17 | 33  | 23  | 36  | 30  | 33  | 42  |
| SMMPA01289 | 21 | 31 | 20 | 189 | 177 | 138 | 84  | 95  | 108 |
| SMMPA01290 | 22 | 17 | 15 | 176 | 194 | 134 | 82  | 108 | 105 |
| SMMPA01291 | 12 | 18 | 16 | 13  | 15  | 19  | 13  | 17  | 25  |
| SMMPA01292 | 14 | 14 | 6  | 17  | 21  | 20  | 15  | 14  | 12  |
| SMMPA01293 | 14 | 5  | 13 | 15  | 22  | 18  | 15  | 16  | 25  |
| SMMPA01294 | 17 | 15 | 12 | 16  | 29  | 23  | 10  | 19  | 25  |
| SMMPA01295 | 12 | 8  | 15 | 18  | 11  | 18  | 15  | 16  | 23  |
| SMMPA01296 | 26 | 27 | 19 | 56  | 45  | 44  | 34  | 30  | 28  |
| SMMPA01297 | 29 | 24 | 16 | 257 | 243 | 161 | 109 | 149 | 114 |
| SMMPA01298 | 6  | 7  | 6  | 23  | 15  | 16  | 9   | 13  | 15  |
| SMMPA01299 | 29 | 20 | 19 | 125 | 141 | 89  | 60  | 81  | 73  |
| SMMPA01300 | 25 | 29 | 22 | 49  | 39  | 33  | 30  | 42  | 38  |
| SMMPA01301 | 13 | 16 | 13 | 324 | 318 | 269 | 110 | 138 | 123 |
| SMMPA01302 | 13 | 26 | 28 | 26  | 17  | 20  | 28  | 25  | 23  |
| SMMPA01303 | 21 | 18 | 15 | 35  | 44  | 31  | 29  | 37  | 34  |
| SMMPA01304 | 30 | 30 | 12 | 45  | 35  | 26  | 21  | 26  | 30  |
| SMMPA01305 | 20 | 15 | 15 | 158 | 131 | 89  | 68  | 93  | 60  |
| SMMPA01306 | 7  | 11 | 10 | 3   | 5   | 9   | 10  | 13  | 13  |
| SMMPA01307 | 5  | 8  | 7  | 13  | 6   | 7   | 7   | 3   | 8   |
| SMMPA01308 | 14 | 20 | 15 | 102 | 80  | 63  | 50  | 76  | 72  |
| SMMPA01309 | 9  | 18 | 15 | 245 | 215 | 181 | 75  | 95  | 86  |
| SMMPA01310 | 13 | 10 | 4  | 56  | 51  | 41  | 18  | 24  | 23  |
| SMMPA01311 | 19 | 20 | 13 | 17  | 25  | 20  | 21  | 24  | 23  |
| SMMPA01312 | 14 | 19 | 26 | 33  | 41  | 38  | 19  | 21  | 15  |
| SMMPA01313 | 22 | 13 | 16 | 30  | 29  | 15  | 22  | 32  | 36  |
| SMMPA01314 | 28 | 25 | 21 | 253 | 212 | 171 | 87  | 106 | 94  |
| SMMPA01315 | 11 | 13 | 14 | 16  | 15  | 15  | 10  | 11  | 15  |

|            |    |    |    |     |     |     |     |     |     |
|------------|----|----|----|-----|-----|-----|-----|-----|-----|
| SMMPA01316 | 20 | 22 | 22 | 71  | 42  | 46  | 34  | 48  | 36  |
| SMMPA01317 | 32 | 27 | 18 | 105 | 88  | 67  | 54  | 64  | 56  |
| SMMPA01318 | 9  | 13 | 12 | 20  | 16  | 16  | 13  | 17  | 13  |
| SMMPA01319 | 16 | 22 | 15 | 14  | 22  | 19  | 13  | 23  | 20  |
| SMMPA01320 | 22 | 10 | 16 | 82  | 82  | 71  | 36  | 42  | 35  |
| SMMPA01321 | 20 | 15 | 14 | 19  | 19  | 21  | 27  | 23  | 16  |
| SMMPA01322 | 10 | 14 | 13 | 31  | 25  | 35  | 19  | 21  | 25  |
| SMMPA01323 | 27 | 13 | 17 | 82  | 73  | 63  | 23  | 33  | 35  |
| SMMPA01324 | 6  | 8  | 7  | 30  | 16  | 13  | 10  | 15  | 11  |
| SMMPA01325 | 63 | 45 | 41 | 27  | 32  | 28  | 45  | 46  | 49  |
| SMMPA01326 | 6  | 9  | 7  | 12  | 10  | 7   | 8   | 12  | 12  |
| SMMPA01327 | 1  | 1  | 1  | 53  | 42  | 45  | 18  | 25  | 36  |
| SMMPA01328 | 24 | 17 | 22 | 100 | 115 | 76  | 41  | 47  | 57  |
| SMMPA01329 | 21 | 24 | 21 | 76  | 76  | 56  | 43  | 56  | 59  |
| SMMPA01330 | 18 | 32 | 11 | 106 | 125 | 94  | 52  | 71  | 66  |
| SMMPA01331 | 12 | 6  | 12 | 7   | 14  | 5   | 10  | 17  | 17  |
| SMMPA01332 | 8  | 23 | 15 | 39  | 33  | 33  | 21  | 30  | 26  |
| SMMPA01333 | 14 | 20 | 9  | 447 | 391 | 384 | 189 | 231 | 221 |
| SMMPA01334 | 19 | 13 | 5  | 15  | 16  | 16  | 18  | 26  | 20  |
| SMMPA01335 | 21 | 14 | 20 | 22  | 19  | 20  | 17  | 29  | 25  |
| SMMPA01336 | 8  | 7  | 7  | 22  | 15  | 16  | 10  | 16  | 10  |
| SMMPA01337 | 11 | 9  | 15 | 21  | 17  | 17  | 21  | 15  | 22  |
| SMMPA01338 | 14 | 14 | 19 | 89  | 62  | 78  | 50  | 63  | 64  |
| SMMPA01339 | 32 | 37 | 27 | 82  | 69  | 47  | 32  | 42  | 47  |
| SMMPA01340 | 9  | 8  | 8  | 12  | 10  | 16  | 14  | 17  | 7   |
| SMMPA01341 | 19 | 19 | 17 | 18  | 15  | 21  | 15  | 22  | 20  |
| SMMPA01342 | 14 | 17 | 11 | 74  | 67  | 66  | 62  | 74  | 58  |
| SMMPA01343 | 4  | 7  | 1  | 40  | 44  | 27  | 27  | 21  | 33  |
| SMMPA01344 | 22 | 26 | 21 | 34  | 23  | 26  | 27  | 26  | 29  |
| SMMPA01345 | 43 | 31 | 34 | 50  | 42  | 37  | 31  | 32  | 36  |
| SMMPA01346 | 12 | 13 | 17 | 60  | 58  | 53  | 33  | 28  | 28  |
| SMMPA01347 | 8  | 7  | 5  | 14  | 20  | 18  | 9   | 15  | 19  |
| SMMPA01348 | 28 | 23 | 38 | 77  | 67  | 78  | 37  | 68  | 53  |
| SMMPA01349 | 13 | 15 | 19 | 19  | 18  | 17  | 14  | 15  | 20  |
| SMMPA01350 | 8  | 12 | 6  | 56  | 45  | 32  | 22  | 45  | 40  |
| SMMPA01351 | 26 | 19 | 14 | 32  | 24  | 23  | 20  | 34  | 27  |
| SMMPA01352 | 17 | 13 | 8  | 14  | 9   | 17  | 17  | 18  | 15  |
| SMMPA01353 | 28 | 29 | 28 | 136 | 122 | 123 | 66  | 91  | 78  |
| SMMPA01354 | 6  | 15 | 8  | 33  | 29  | 15  | 17  | 16  | 22  |
| SMMPA01355 | 17 | 18 | 13 | 88  | 69  | 61  | 19  | 39  | 46  |
| SMMPA01356 | 16 | 31 | 13 | 219 | 230 | 209 | 86  | 99  | 102 |

|            |    |    |    |      |      |     |     |     |     |
|------------|----|----|----|------|------|-----|-----|-----|-----|
| SMMPA01357 | 18 | 21 | 10 | 33   | 21   | 31  | 9   | 20  | 19  |
| SMMPA01358 | 9  | 9  | 7  | 27   | 40   | 19  | 12  | 17  | 21  |
| SMMPA01359 | 32 | 30 | 29 | 92   | 96   | 63  | 49  | 63  | 53  |
| SMMPA01360 | 20 | 11 | 13 | 47   | 37   | 33  | 27  | 31  | 33  |
| SMMPA01361 | 15 | 12 | 12 | 22   | 15   | 16  | 20  | 23  | 16  |
| SMMPA01362 | 13 | 11 | 8  | 77   | 57   | 54  | 21  | 54  | 35  |
| SMMPA01363 | 33 | 36 | 29 | 136  | 129  | 97  | 59  | 65  | 45  |
| SMMPA01364 | 10 | 13 | 11 | 81   | 62   | 56  | 31  | 46  | 37  |
| SMMPA01365 | 28 | 28 | 28 | 275  | 316  | 224 | 104 | 128 | 130 |
| SMMPA01366 | 2  | 5  | 7  | 33   | 41   | 25  | 18  | 25  | 28  |
| SMMPA01367 | 25 | 29 | 21 | 29   | 25   | 37  | 30  | 44  | 30  |
| SMMPA01368 | 30 | 31 | 21 | 54   | 38   | 50  | 37  | 32  | 40  |
| SMMPA01369 | 13 | 9  | 9  | 24   | 21   | 21  | 14  | 19  | 19  |
| SMMPA01370 | 13 | 24 | 26 | 442  | 425  | 282 | 142 | 173 | 181 |
| SMMPA01371 | 34 | 28 | 29 | 493  | 526  | 341 | 259 | 364 | 294 |
| SMMPA01372 | 18 | 31 | 30 | 267  | 260  | 175 | 72  | 120 | 101 |
| SMMPA01373 | 37 | 33 | 27 | 540  | 440  | 323 | 205 | 281 | 248 |
| SMMPA01374 | 25 | 38 | 30 | 464  | 427  | 329 | 199 | 261 | 213 |
| SMMPA01375 | 21 | 31 | 19 | 527  | 459  | 335 | 206 | 296 | 279 |
| SMMPA01376 | 23 | 20 | 15 | 93   | 115  | 75  | 65  | 90  | 83  |
| SMMPA01377 | 48 | 27 | 26 | 1327 | 1270 | 985 | 469 | 579 | 557 |
| SMMPA01378 | 10 | 18 | 8  | 118  | 78   | 60  | 76  | 88  | 83  |
| SMMPA01379 | 62 | 69 | 57 | 282  | 241  | 199 | 163 | 226 | 199 |
| SMMPA01380 | 27 | 31 | 25 | 48   | 40   | 37  | 35  | 30  | 38  |
| SMMPA01381 | 14 | 19 | 17 | 15   | 10   | 11  | 7   | 16  | 20  |
| SMMPA01382 | 30 | 38 | 25 | 264  | 235  | 193 | 101 | 194 | 140 |
| SMMPA01383 | 66 | 59 | 40 | 216  | 152  | 153 | 82  | 110 | 105 |
| SMMPA01384 | 23 | 31 | 27 | 55   | 51   | 55  | 33  | 42  | 36  |
| SMMPA01385 | 14 | 18 | 19 | 27   | 22   | 19  | 35  | 38  | 47  |
| SMMPA01386 | 21 | 22 | 15 | 47   | 39   | 27  | 30  | 43  | 24  |
| SMMPA01387 | 28 | 27 | 19 | 74   | 83   | 53  | 54  | 38  | 38  |
| SMMPA01388 | 33 | 47 | 32 | 103  | 100  | 80  | 56  | 59  | 47  |
| SMMPA01389 | 32 | 27 | 31 | 56   | 46   | 54  | 33  | 44  | 46  |
| SMMPA01390 | 8  | 15 | 7  | 12   | 19   | 15  | 11  | 20  | 14  |
| SMMPA01391 | 31 | 27 | 23 | 46   | 40   | 38  | 38  | 40  | 51  |
| SMMPA01392 | 24 | 20 | 23 | 51   | 36   | 39  | 12  | 34  | 16  |
| SMMPA01393 | 17 | 18 | 18 | 36   | 32   | 26  | 25  | 30  | 39  |
| SMMPA01394 | 16 | 11 | 18 | 61   | 44   | 30  | 26  | 21  | 38  |
| SMMPA01395 | 11 | 20 | 17 | 25   | 29   | 12  | 22  | 35  | 25  |
| SMMPA01396 | 14 | 17 | 15 | 26   | 26   | 20  | 20  | 29  | 31  |
| SMMPA01397 | 6  | 5  | 5  | 30   | 31   | 18  | 18  | 13  | 15  |

|            |    |    |    |     |     |     |     |     |     |
|------------|----|----|----|-----|-----|-----|-----|-----|-----|
| SMMPA01398 | 10 | 20 | 13 | 28  | 22  | 19  | 15  | 25  | 35  |
| SMMPA01399 | 25 | 17 | 16 | 14  | 17  | 11  | 21  | 25  | 21  |
| SMMPA01400 | 20 | 18 | 23 | 26  | 24  | 19  | 17  | 25  | 25  |
| SMMPA01401 | 16 | 17 | 14 | 33  | 28  | 32  | 24  | 30  | 37  |
| SMMPA01402 | 30 | 28 | 14 | 65  | 70  | 48  | 44  | 43  | 51  |
| SMMPA01403 | 32 | 37 | 27 | 66  | 72  | 50  | 44  | 59  | 60  |
| SMMPA01404 | 26 | 21 | 19 | 45  | 31  | 30  | 30  | 40  | 47  |
| SMMPA01405 | 26 | 20 | 24 | 41  | 34  | 35  | 27  | 34  | 36  |
| SMMPA01406 | 43 | 36 | 42 | 58  | 67  | 64  | 56  | 76  | 65  |
| SMMPA01407 | 24 | 23 | 17 | 47  | 58  | 54  | 30  | 42  | 48  |
| SMMPA01408 | 6  | 4  | 11 | 27  | 25  | 16  | 16  | 16  | 9   |
| SMMPA01409 | 23 | 23 | 10 | 97  | 86  | 90  | 34  | 40  | 50  |
| SMMPA01410 | 18 | 17 | 11 | 50  | 34  | 43  | 25  | 24  | 29  |
| SMMPA01411 | 19 | 25 | 27 | 194 | 192 | 160 | 95  | 144 | 88  |
| SMMPA01412 | 4  | 10 | 7  | 15  | 26  | 15  | 13  | 8   | 12  |
| SMMPA01413 | 11 | 20 | 13 | 120 | 96  | 91  | 42  | 68  | 64  |
| SMMPA01414 | 21 | 22 | 17 | 168 | 152 | 125 | 51  | 83  | 63  |
| SMMPA01415 | 5  | 13 | 9  | 126 | 128 | 98  | 40  | 84  | 66  |
| SMMPA01416 | 17 | 16 | 36 | 294 | 295 | 243 | 155 | 234 | 187 |
| SMMPA01417 | 17 | 23 | 20 | 443 | 397 | 366 | 199 | 242 | 234 |
| SMMPA01418 | 6  | 15 | 19 | 190 | 176 | 122 | 69  | 101 | 85  |
| SMMPA01419 | 24 | 14 | 16 | 365 | 309 | 269 | 156 | 197 | 168 |
| SMMPA01420 | 18 | 10 | 11 | 316 | 334 | 257 | 134 | 166 | 160 |
| SMMPA01421 | 17 | 18 | 13 | 301 | 273 | 202 | 138 | 205 | 202 |
| SMMPA01422 | 19 | 22 | 16 | 597 | 523 | 438 | 233 | 299 | 276 |
| SMMPA01423 | 46 | 30 | 32 | 60  | 54  | 46  | 47  | 66  | 60  |
| SMMPA01424 | 49 | 38 | 50 | 73  | 73  | 46  | 59  | 75  | 67  |
| SMMPA01425 | 24 | 31 | 38 | 62  | 68  | 51  | 42  | 74  | 63  |
| SMMPA01426 | 33 | 49 | 22 | 74  | 104 | 70  | 49  | 88  | 78  |
| SMMPA01427 | 32 | 37 | 26 | 74  | 57  | 48  | 51  | 66  | 60  |
| SMMPA01428 | 26 | 32 | 27 | 71  | 68  | 53  | 59  | 54  | 48  |
| SMMPA01429 | 32 | 23 | 32 | 86  | 78  | 60  | 67  | 57  | 69  |
| SMMPA01430 | 33 | 35 | 28 | 51  | 53  | 42  | 36  | 44  | 43  |
| SMMPA01431 | 25 | 23 | 19 | 70  | 48  | 42  | 31  | 40  | 54  |
| SMMPA01432 | 18 | 21 | 15 | 66  | 71  | 59  | 43  | 45  | 55  |
| SMMPA01433 | 8  | 14 | 11 | 26  | 22  | 23  | 17  | 25  | 26  |
| SMMPA01434 | 23 | 23 | 13 | 41  | 46  | 35  | 26  | 30  | 35  |
| SMMPA01435 | 13 | 8  | 13 | 16  | 11  | 14  | 22  | 18  | 20  |
| SMMPA01436 | 14 | 16 | 29 | 29  | 29  | 27  | 15  | 16  | 23  |
| SMMPA01437 | 19 | 19 | 32 | 28  | 19  | 22  | 33  | 42  | 53  |
| SMMPA01438 | 13 | 11 | 11 | 28  | 27  | 21  | 17  | 20  | 21  |

|            |    |    |    |     |     |     |     |     |     |
|------------|----|----|----|-----|-----|-----|-----|-----|-----|
| SMMPA01439 | 5  | 12 | 10 | 45  | 34  | 44  | 18  | 22  | 15  |
| SMMPA01440 | 11 | 22 | 9  | 17  | 21  | 17  | 19  | 27  | 39  |
| SMMPA01441 | 28 | 25 | 25 | 410 | 344 | 257 | 131 | 184 | 155 |
| SMMPA01442 | 61 | 54 | 71 | 63  | 62  | 41  | 54  | 61  | 57  |
| SMMPA01443 | 7  | 4  | 8  | 108 | 115 | 103 | 19  | 29  | 20  |
| SMMPA01444 | 34 | 45 | 46 | 431 | 389 | 300 | 140 | 176 | 173 |
| SMMPA01445 | 38 | 44 | 35 | 320 | 278 | 201 | 111 | 142 | 153 |
| SMMPA01446 | 14 | 33 | 17 | 257 | 202 | 183 | 105 | 133 | 145 |
| SMMPA01447 | 54 | 62 | 52 | 505 | 518 | 376 | 194 | 258 | 230 |
| SMMPA01448 | 11 | 10 | 8  | 257 | 265 | 222 | 76  | 113 | 70  |
| SMMPA01449 | 35 | 32 | 20 | 18  | 19  | 12  | 28  | 31  | 32  |
| SMMPA01450 | 13 | 15 | 15 | 190 | 148 | 128 | 115 | 139 | 117 |
| SMMPA01451 | 22 | 17 | 18 | 37  | 33  | 38  | 34  | 33  | 27  |
| SMMPA01452 | 65 | 75 | 45 | 93  | 89  | 77  | 91  | 122 | 134 |
| SMMPA01453 | 12 | 5  | 9  | 47  | 41  | 39  | 30  | 26  | 25  |
| SMMPA01454 | 16 | 14 | 11 | 34  | 38  | 24  | 27  | 25  | 25  |
| SMMPA01455 | 19 | 19 | 22 | 42  | 37  | 30  | 26  | 31  | 36  |
| SMMPA01456 | 21 | 18 | 15 | 48  | 48  | 40  | 28  | 40  | 26  |
| SMMPA01457 | 19 | 24 | 18 | 61  | 49  | 47  | 25  | 37  | 39  |
| SMMPA01458 | 6  | 9  | 7  | 17  | 35  | 25  | 16  | 16  | 9   |
| SMMPA01459 | 11 | 21 | 10 | 32  | 31  | 27  | 16  | 26  | 35  |
| SMMPA01460 | 42 | 53 | 34 | 82  | 56  | 50  | 59  | 74  | 74  |
| SMMPA01461 | 31 | 25 | 22 | 121 | 109 | 94  | 79  | 112 | 110 |
| SMMPA01462 | 29 | 22 | 21 | 91  | 88  | 68  | 38  | 76  | 44  |
| SMMPA01463 | 8  | 4  | 4  | 11  | 16  | 11  | 8   | 9   | 8   |
| SMMPA01464 | 2  | 8  | 6  | 9   | 9   | 13  | 8   | 6   | 7   |
| SMMPA01465 | 3  | 4  | 5  | 7   | 3   | 4   | 2   | 5   | 4   |
| SMMPA01466 | 18 | 12 | 11 | 33  | 41  | 33  | 11  | 12  | 18  |
| SMMPA01467 | 7  | 9  | 7  | 10  | 8   | 9   | 3   | 8   | 8   |
| SMMPA01468 | 8  | 6  | 3  | 36  | 30  | 28  | 14  | 17  | 18  |
| SMMPA01469 | 10 | 8  | 8  | 223 | 196 | 155 | 49  | 90  | 71  |
| SMMPA01470 | 14 | 19 | 18 | 45  | 44  | 36  | 26  | 31  | 18  |
| SMMPA01471 | 15 | 9  | 13 | 28  | 23  | 10  | 11  | 21  | 19  |
| SMMPA01472 | 20 | 21 | 17 | 91  | 73  | 84  | 58  | 60  | 75  |
| SMMPA01473 | 16 | 28 | 24 | 34  | 31  | 47  | 26  | 40  | 34  |
| SMMPA01474 | 44 | 43 | 38 | 37  | 60  | 62  | 46  | 65  | 63  |
| SMMPA01475 | 11 | 15 | 16 | 35  | 36  | 25  | 26  | 37  | 46  |
| SMMPA01476 | 21 | 21 | 23 | 38  | 29  | 41  | 33  | 34  | 22  |
| SMMPA01477 | 25 | 36 | 23 | 53  | 47  | 44  | 20  | 29  | 27  |
| SMMPA01478 | 39 | 30 | 28 | 30  | 34  | 39  | 37  | 47  | 47  |
| SMMPA01479 | 35 | 37 | 34 | 52  | 72  | 48  | 40  | 69  | 59  |

|            |    |    |    |     |     |     |     |     |     |
|------------|----|----|----|-----|-----|-----|-----|-----|-----|
| SMMPA01480 | 28 | 18 | 14 | 39  | 54  | 48  | 34  | 42  | 44  |
| SMMPA01481 | 11 | 15 | 3  | 32  | 32  | 29  | 13  | 21  | 19  |
| SMMPA01482 | 14 | 21 | 17 | 31  | 21  | 26  | 20  | 25  | 29  |
| SMMPA01483 | 12 | 13 | 12 | 20  | 18  | 20  | 11  | 18  | 17  |
| SMMPA01484 | 22 | 23 | 25 | 31  | 35  | 57  | 35  | 40  | 30  |
| SMMPA01485 | 11 | 3  | 15 | 24  | 24  | 28  | 26  | 22  | 17  |
| SMMPA01486 | 11 | 18 | 14 | 16  | 21  | 23  | 29  | 15  | 12  |
| SMMPA01487 | 17 | 17 | 16 | 15  | 19  | 19  | 17  | 21  | 24  |
| SMMPA01488 | 18 | 15 | 13 | 72  | 71  | 72  | 33  | 49  | 26  |
| SMMPA01489 | 28 | 25 | 20 | 93  | 93  | 98  | 54  | 70  | 64  |
| SMMPA01490 | 8  | 6  | 5  | 75  | 63  | 72  | 19  | 34  | 34  |
| SMMPA01491 | 24 | 25 | 25 | 167 | 126 | 103 | 91  | 86  | 96  |
| SMMPA01492 | 14 | 8  | 11 | 38  | 49  | 51  | 29  | 37  | 26  |
| SMMPA01493 | 30 | 34 | 27 | 48  | 44  | 44  | 40  | 40  | 37  |
| SMMPA01494 | 20 | 23 | 26 | 39  | 40  | 35  | 28  | 35  | 28  |
| SMMPA01495 | 20 | 21 | 12 | 76  | 76  | 56  | 49  | 52  | 64  |
| SMMPA01496 | 26 | 31 | 31 | 142 | 121 | 91  | 74  | 96  | 62  |
| SMMPA01497 | 18 | 14 | 15 | 40  | 32  | 30  | 29  | 35  | 43  |
| SMMPA01498 | 22 | 36 | 17 | 66  | 49  | 49  | 45  | 59  | 53  |
| SMMPA01499 | 26 | 17 | 16 | 832 | 780 | 833 | 439 | 614 | 536 |
| SMMPA01500 | 12 | 18 | 13 | 202 | 187 | 176 | 65  | 95  | 62  |
| SMMPA01501 | 11 | 7  | 9  | 82  | 88  | 54  | 25  | 39  | 36  |
| SMMPA01502 | 12 | 20 | 12 | 336 | 341 | 274 | 147 | 202 | 178 |
| SMMPA01503 | 16 | 8  | 10 | 210 | 146 | 131 | 89  | 121 | 106 |
| SMMPA01504 | 12 | 21 | 15 | 74  | 67  | 41  | 29  | 40  | 38  |
| SMMPA01505 | 13 | 16 | 10 | 135 | 101 | 66  | 56  | 60  | 71  |
| SMMPA01506 | 20 | 14 | 18 | 107 | 95  | 76  | 40  | 37  | 55  |
| SMMPA01507 | 11 | 10 | 7  | 28  | 14  | 14  | 9   | 11  | 13  |
| SMMPA01508 | 9  | 4  | 2  | 13  | 12  | 13  | 6   | 6   | 14  |
| SMMPA01509 | 21 | 10 | 19 | 52  | 64  | 37  | 25  | 31  | 23  |
| SMMPA01510 | 10 | 11 | 2  | 11  | 18  | 16  | 10  | 12  | 13  |
| SMMPA01511 | 9  | 11 | 5  | 12  | 12  | 15  | 10  | 13  | 5   |
| SMMPA01512 | 9  | 6  | 10 | 11  | 20  | 13  | 9   | 18  | 10  |
| SMMPA01513 | 23 | 26 | 28 | 159 | 119 | 91  | 61  | 108 | 84  |
| SMMPA01514 | 29 | 29 | 28 | 65  | 57  | 49  | 56  | 56  | 49  |
| SMMPA01515 | 11 | 4  | 6  | 18  | 20  | 13  | 17  | 21  | 16  |
| SMMPA01516 | 21 | 38 | 26 | 149 | 139 | 112 | 81  | 111 | 97  |
| SMMPA01517 | 41 | 33 | 31 | 120 | 152 | 104 | 36  | 57  | 59  |
| SMMPA01518 | 16 | 14 | 10 | 144 | 108 | 80  | 67  | 78  | 72  |
| SMMPA01519 | 18 | 29 | 23 | 81  | 50  | 69  | 38  | 51  | 47  |
| SMMPA01520 | 25 | 25 | 20 | 879 | 813 | 752 | 446 | 546 | 512 |

|            |    |    |    |     |     |     |     |     |     |
|------------|----|----|----|-----|-----|-----|-----|-----|-----|
| SMMPA01521 | 10 | 9  | 8  | 23  | 16  | 11  | 25  | 24  | 23  |
| SMMPA01522 | 28 | 39 | 28 | 36  | 38  | 20  | 53  | 52  | 51  |
| SMMPA01523 | 33 | 26 | 28 | 66  | 64  | 55  | 61  | 86  | 76  |
| SMMPA01524 | 3  | 5  | 8  | 19  | 8   | 14  | 14  | 16  | 16  |
| SMMPA01525 | 4  | 5  | 5  | 17  | 18  | 16  | 12  | 11  | 7   |
| SMMPA01526 | 8  | 11 | 8  | 21  | 19  | 12  | 33  | 33  | 28  |
| SMMPA01527 | 31 | 29 | 14 | 33  | 37  | 33  | 43  | 67  | 45  |
| SMMPA01528 | 10 | 4  | 7  | 14  | 12  | 2   | 10  | 13  | 13  |
| SMMPA01529 | 17 | 25 | 32 | 52  | 51  | 40  | 27  | 45  | 45  |
| SMMPA01530 | 20 | 29 | 12 | 105 | 88  | 60  | 49  | 66  | 59  |
| SMMPA01531 | 19 | 28 | 17 | 59  | 57  | 42  | 47  | 55  | 33  |
| SMMPA01532 | 18 | 20 | 22 | 74  | 50  | 67  | 70  | 87  | 59  |
| SMMPA01533 | 26 | 17 | 24 | 88  | 73  | 63  | 56  | 76  | 64  |
| SMMPA01534 | 31 | 31 | 23 | 88  | 80  | 66  | 38  | 65  | 41  |
| SMMPA01535 | 26 | 19 | 20 | 44  | 30  | 44  | 30  | 35  | 39  |
| SMMPA01536 | 24 | 19 | 27 | 18  | 28  | 19  | 29  | 33  | 29  |
| SMMPA01537 | 20 | 16 | 24 | 124 | 154 | 108 | 54  | 77  | 57  |
| SMMPA01538 | 25 | 21 | 18 | 471 | 432 | 379 | 197 | 244 | 237 |
| SMMPA01539 | 7  | 18 | 11 | 32  | 24  | 24  | 10  | 23  | 21  |
| SMMPA01540 | 31 | 40 | 40 | 88  | 69  | 70  | 49  | 72  | 84  |
| SMMPA01541 | 20 | 25 | 19 | 73  | 54  | 53  | 42  | 64  | 49  |
| SMMPA01542 | 38 | 34 | 38 | 266 | 242 | 190 | 82  | 115 | 116 |
| SMMPA01543 | 22 | 16 | 15 | 197 | 164 | 140 | 121 | 144 | 120 |
| SMMPA01544 | 21 | 20 | 20 | 389 | 358 | 285 | 151 | 204 | 189 |
| SMMPA01545 | 23 | 36 | 22 | 417 | 438 | 337 | 193 | 253 | 249 |
| SMMPA01546 | 28 | 20 | 18 | 552 | 492 | 433 | 289 | 378 | 359 |
| SMMPA01547 | 18 | 21 | 14 | 55  | 59  | 31  | 49  | 51  | 50  |
| SMMPA01548 | 9  | 12 | 7  | 85  | 60  | 63  | 30  | 45  | 23  |
| SMMPA01549 | 10 | 3  | 11 | 14  | 18  | 22  | 15  | 16  | 16  |
| SMMPA01550 | 15 | 12 | 12 | 19  | 20  | 24  | 28  | 17  | 20  |
| SMMPA01551 | 17 | 15 | 13 | 25  | 23  | 18  | 35  | 47  | 33  |
| SMMPA01552 | 49 | 46 | 41 | 91  | 79  | 61  | 68  | 101 | 97  |
| SMMPA01553 | 35 | 37 | 31 | 56  | 40  | 32  | 53  | 54  | 79  |
| SMMPA01554 | 57 | 44 | 36 | 63  | 68  | 54  | 52  | 55  | 59  |
| SMMPA01555 | 33 | 47 | 33 | 60  | 43  | 39  | 24  | 53  | 50  |
| SMMPA01556 | 15 | 16 | 8  | 42  | 56  | 45  | 29  | 63  | 29  |
| SMMPA01557 | 12 | 16 | 20 | 169 | 150 | 121 | 77  | 105 | 102 |
| SMMPA01558 | 17 | 7  | 11 | 153 | 165 | 132 | 79  | 95  | 92  |
| SMMPA01559 | 12 | 14 | 17 | 50  | 70  | 52  | 13  | 28  | 42  |
| SMMPA01560 | 20 | 13 | 5  | 53  | 51  | 39  | 27  | 35  | 45  |
| SMMPA01561 | 5  | 6  | 4  | 52  | 50  | 29  | 19  | 27  | 23  |

|            |    |    |    |     |     |     |    |     |     |
|------------|----|----|----|-----|-----|-----|----|-----|-----|
| SMMPA01562 | 36 | 28 | 37 | 239 | 193 | 152 | 59 | 101 | 88  |
| SMMPA01563 | 22 | 14 | 13 | 61  | 51  | 51  | 47 | 32  | 49  |
| SMMPA01564 | 5  | 10 | 4  | 21  | 28  | 20  | 7  | 10  | 6   |
| SMMPA01565 | 12 | 11 | 11 | 122 | 119 | 89  | 37 | 32  | 47  |
| SMMPA01566 | 35 | 31 | 15 | 30  | 27  | 25  | 20 | 35  | 19  |
| SMMPA01567 | 15 | 12 | 16 | 19  | 15  | 22  | 31 | 40  | 43  |
| SMMPA01568 | 21 | 22 | 25 | 25  | 30  | 20  | 21 | 26  | 45  |
| SMMPA01569 | 14 | 9  | 13 | 31  | 25  | 25  | 36 | 40  | 34  |
| SMMPA01570 | 18 | 20 | 20 | 34  | 34  | 31  | 26 | 28  | 28  |
| SMMPA01571 | 13 | 15 | 14 | 16  | 16  | 25  | 18 | 27  | 18  |
| SMMPA01572 | 29 | 34 | 28 | 53  | 38  | 32  | 26 | 37  | 51  |
| SMMPA01573 | 18 | 19 | 18 | 49  | 30  | 41  | 49 | 56  | 75  |
| SMMPA01574 | 19 | 14 | 14 | 47  | 34  | 32  | 27 | 28  | 32  |
| SMMPA01575 | 21 | 16 | 16 | 34  | 24  | 22  | 14 | 20  | 33  |
| SMMPA01576 | 14 | 24 | 20 | 83  | 68  | 54  | 39 | 67  | 50  |
| SMMPA01577 | 30 | 22 | 21 | 31  | 31  | 32  | 29 | 43  | 38  |
| SMMPA01578 | 39 | 50 | 37 | 97  | 93  | 84  | 77 | 103 | 101 |
| SMMPA01579 | 9  | 15 | 12 | 11  | 14  | 18  | 10 | 16  | 14  |
| SMMPA01580 | 7  | 8  | 7  | 8   | 4   | 4   | 12 | 9   | 11  |
| SMMPA01581 | 15 | 14 | 16 | 17  | 20  | 22  | 17 | 29  | 26  |
| SMMPA01582 | 45 | 27 | 22 | 168 | 160 | 125 | 94 | 132 | 126 |
| SMMPA01583 | 36 | 29 | 26 | 155 | 123 | 101 | 48 | 64  | 57  |
| SMMPA01584 | 22 | 14 | 21 | 28  | 36  | 23  | 33 | 35  | 31  |
| SMMPA01585 | 40 | 30 | 39 | 34  | 48  | 28  | 76 | 71  | 84  |
| SMMPA01586 | 9  | 10 | 12 | 41  | 53  | 38  | 21 | 29  | 25  |
| SMMPA01587 | 12 | 6  | 14 | 88  | 87  | 65  | 54 | 68  | 56  |
| SMMPA01588 | 15 | 15 | 12 | 88  | 77  | 56  | 33 | 41  | 46  |
| SMMPA01589 | 9  | 6  | 4  | 27  | 39  | 32  | 16 | 28  | 28  |
| SMMPA01590 | 5  | 7  | 5  | 35  | 41  | 22  | 24 | 35  | 33  |
| SMMPA01591 | 11 | 8  | 7  | 124 | 110 | 93  | 46 | 57  | 57  |
| SMMPA01592 | 10 | 15 | 13 | 122 | 130 | 105 | 85 | 86  | 88  |
| SMMPA01593 | 23 | 23 | 18 | 183 | 175 | 121 | 93 | 119 | 124 |
| SMMPA01594 | 13 | 14 | 19 | 145 | 140 | 104 | 86 | 104 | 89  |
| SMMPA01595 | 19 | 23 | 18 | 105 | 96  | 61  | 45 | 69  | 62  |
| SMMPA01596 | 22 | 14 | 21 | 60  | 81  | 58  | 47 | 67  | 44  |
| SMMPA01597 | 36 | 36 | 27 | 128 | 160 | 95  | 85 | 128 | 98  |
| SMMPA01598 | 24 | 25 | 17 | 43  | 39  | 30  | 42 | 43  | 50  |
| SMMPA01599 | 17 | 21 | 24 | 202 | 165 | 120 | 85 | 102 | 85  |
| SMMPA01600 | 35 | 29 | 26 | 167 | 158 | 131 | 89 | 138 | 141 |
| SMMPA01601 | 5  | 8  | 11 | 33  | 33  | 20  | 27 | 40  | 35  |
| SMMPA01602 | 12 | 22 | 18 | 112 | 83  | 85  | 61 | 83  | 61  |



|            |    |    |    |     |     |     |    |    |    |
|------------|----|----|----|-----|-----|-----|----|----|----|
| SMMPA01603 | 22 | 20 | 17 | 29  | 16  | 24  | 19 | 20 | 30 |
| SMMPA01604 | 12 | 10 | 9  | 22  | 8   | 13  | 12 | 18 | 19 |
| SMMPA01605 | 16 | 14 | 11 | 23  | 19  | 19  | 16 | 20 | 31 |
| SMMPA01606 | 20 | 19 | 12 | 11  | 15  | 11  | 21 | 24 | 14 |
| SMMPA01607 | 20 | 13 | 14 | 56  | 36  | 29  | 40 | 50 | 37 |
| SMMPA01608 | 15 | 16 | 14 | 17  | 23  | 22  | 22 | 24 | 17 |
| SMMPA01609 | 15 | 20 | 20 | 28  | 11  | 9   | 19 | 28 | 26 |
| SMMPA01610 | 15 | 12 | 9  | 27  | 24  | 15  | 12 | 19 | 31 |
| SMMPA01611 | 14 | 13 | 16 | 10  | 8   | 14  | 18 | 37 | 26 |
| SMMPA01612 | 14 | 20 | 18 | 28  | 12  | 13  | 14 | 29 | 17 |
| SMMPA01613 | 9  | 16 | 10 | 60  | 61  | 37  | 46 | 38 | 38 |
| SMMPA01614 | 12 | 10 | 5  | 42  | 24  | 29  | 17 | 18 | 20 |
| SMMPA01615 | 3  | 7  | 5  | 27  | 30  | 23  | 14 | 19 | 20 |
| SMMPA01616 | 5  | 8  | 5  | 98  | 115 | 98  | 41 | 46 | 41 |
| SMMPA01617 | 4  | 11 | 6  | 51  | 63  | 56  | 20 | 20 | 15 |
| SMMPA01618 | 10 | 12 | 10 | 26  | 40  | 24  | 16 | 23 | 10 |
| SMMPA01619 | 21 | 14 | 18 | 177 | 178 | 125 | 68 | 69 | 85 |
| SMMPA01620 | 20 | 20 | 27 | 141 | 137 | 118 | 72 | 66 | 62 |
| SMMPA01621 | 22 | 17 | 12 | 123 | 113 | 103 | 32 | 41 | 43 |
| SMMPA01622 | 19 | 24 | 22 | 78  | 72  | 68  | 46 | 51 | 49 |
| SMMPA01623 | 23 | 20 | 23 | 34  | 46  | 38  | 24 | 33 | 26 |
| SMMPA01624 | 18 | 20 | 16 | 25  | 24  | 14  | 35 | 29 | 28 |
| SMMPA01625 | 26 | 31 | 27 | 26  | 18  | 25  | 30 | 35 | 34 |
| SMMPA01626 | 32 | 42 | 31 | 77  | 62  | 56  | 36 | 57 | 62 |
| SMMPA01627 | 6  | 9  | 3  | 3   | 9   | 11  | 7  | 16 | 9  |
| SMMPA01628 | 15 | 16 | 13 | 19  | 8   | 15  | 9  | 18 | 20 |
| SMMPA01629 | 12 | 15 | 10 | 13  | 11  | 15  | 18 | 17 | 16 |
| SMMPA01630 | 15 | 19 | 21 | 17  | 15  | 24  | 20 | 26 | 27 |
| SMMPA01631 | 10 | 9  | 12 | 8   | 17  | 17  | 11 | 18 | 21 |
| SMMPA01632 | 21 | 29 | 20 | 35  | 39  | 27  | 27 | 39 | 36 |
| SMMPA01633 | 7  | 2  | 5  | 3   | 4   | 2   | 5  | 6  | 8  |
| SMMPA01634 | 16 | 9  | 8  | 39  | 34  | 26  | 14 | 19 | 19 |
| SMMPA01635 | 44 | 32 | 29 | 33  | 37  | 38  | 20 | 27 | 31 |
| SMMPA01636 | 17 | 18 | 18 | 162 | 149 | 99  | 49 | 83 | 61 |
| SMMPA01637 | 33 | 32 | 20 | 116 | 115 | 92  | 54 | 67 | 50 |
| SMMPA01638 | 8  | 8  | 8  | 12  | 15  | 16  | 9  | 10 | 8  |
| SMMPA01639 | 20 | 23 | 14 | 22  | 26  | 22  | 9  | 12 | 13 |
| SMMPA01640 | 8  | 2  | 6  | 12  | 12  | 10  | 12 | 17 | 9  |
| SMMPA01641 | 11 | 8  | 15 | 22  | 22  | 27  | 12 | 17 | 24 |
| SMMPA01642 | 4  | 6  | 8  | 9   | 11  | 5   | 6  | 10 | 14 |
| SMMPA01643 | 3  | 6  | 5  | 21  | 19  | 16  | 6  | 14 | 16 |

|            |    |    |    |     |     |     |     |     |     |
|------------|----|----|----|-----|-----|-----|-----|-----|-----|
| SMMPA01644 | 11 | 11 | 10 | 47  | 46  | 40  | 28  | 38  | 34  |
| SMMPA01645 | 9  | 7  | 11 | 11  | 16  | 13  | 13  | 17  | 9   |
| SMMPA01646 | 12 | 14 | 11 | 46  | 37  | 39  | 17  | 12  | 31  |
| SMMPA01647 | 4  | 3  | 1  | 4   | 1   | 5   | 4   | 3   | 4   |
| SMMPA01648 | 4  | 8  | 7  | 20  | 20  | 8   | 8   | 9   | 13  |
| SMMPA01649 | 28 | 22 | 26 | 16  | 25  | 29  | 43  | 62  | 54  |
| SMMPA01650 | 21 | 23 | 14 | 54  | 40  | 28  | 48  | 74  | 68  |
| SMMPA01651 | 28 | 38 | 32 | 90  | 75  | 58  | 95  | 107 | 90  |
| SMMPA01652 | 6  | 6  | 9  | 11  | 7   | 7   | 9   | 16  | 14  |
| SMMPA01653 | 23 | 22 | 24 | 35  | 31  | 27  | 35  | 30  | 42  |
| SMMPA01654 | 15 | 17 | 13 | 12  | 17  | 15  | 15  | 20  | 18  |
| SMMPA01655 | 16 | 19 | 34 | 87  | 89  | 90  | 40  | 46  | 54  |
| SMMPA01656 | 21 | 19 | 15 | 19  | 22  | 18  | 27  | 33  | 30  |
| SMMPA01657 | 27 | 29 | 20 | 61  | 54  | 51  | 49  | 71  | 67  |
| SMMPA01658 | 40 | 37 | 30 | 46  | 45  | 44  | 53  | 59  | 56  |
| SMMPA01659 | 14 | 14 | 14 | 14  | 32  | 25  | 23  | 21  | 27  |
| SMMPA01660 | 8  | 3  | 6  | 30  | 42  | 33  | 28  | 36  | 33  |
| SMMPA01661 | 5  | 9  | 5  | 30  | 46  | 28  | 16  | 12  | 13  |
| SMMPA01662 | 12 | 12 | 11 | 38  | 35  | 17  | 22  | 28  | 38  |
| SMMPA01663 | 9  | 7  | 7  | 19  | 18  | 24  | 16  | 26  | 24  |
| SMMPA01664 | 21 | 30 | 20 | 24  | 28  | 21  | 34  | 29  | 43  |
| SMMPA01665 | 22 | 22 | 19 | 23  | 20  | 15  | 18  | 38  | 52  |
| SMMPA01666 | 12 | 19 | 9  | 30  | 24  | 30  | 21  | 20  | 22  |
| SMMPA01667 | 28 | 22 | 29 | 16  | 28  | 24  | 39  | 43  | 49  |
| SMMPA01668 | 22 | 15 | 14 | 26  | 22  | 17  | 27  | 31  | 29  |
| SMMPA01669 | 8  | 6  | 9  | 36  | 38  | 22  | 29  | 20  | 27  |
| SMMPA01670 | 12 | 12 | 8  | 53  | 63  | 70  | 17  | 47  | 27  |
| SMMPA01671 | 3  | 7  | 5  | 53  | 47  | 43  | 26  | 32  | 29  |
| SMMPA01672 | 9  | 14 | 14 | 171 | 183 | 172 | 61  | 95  | 75  |
| SMMPA01673 | 8  | 20 | 17 | 207 | 174 | 151 | 100 | 119 | 118 |
| SMMPA01674 | 29 | 32 | 16 | 40  | 39  | 37  | 41  | 45  | 31  |
| SMMPA01675 | 21 | 27 | 23 | 33  | 36  | 22  | 18  | 25  | 12  |
| SMMPA01676 | 29 | 54 | 41 | 93  | 108 | 68  | 63  | 68  | 76  |
| SMMPA01677 | 20 | 28 | 24 | 45  | 33  | 37  | 29  | 26  | 42  |
| SMMPA01678 | 36 | 25 | 20 | 60  | 55  | 54  | 35  | 54  | 60  |
| SMMPA01679 | 11 | 16 | 9  | 71  | 53  | 43  | 24  | 39  | 38  |
| SMMPA01680 | 13 | 8  | 8  | 39  | 23  | 18  | 22  | 22  | 24  |
| SMMPA01681 | 15 | 12 | 16 | 110 | 82  | 77  | 53  | 81  | 64  |
| SMMPA01682 | 11 | 17 | 16 | 190 | 175 | 126 | 83  | 105 | 97  |
| SMMPA01683 | 16 | 20 | 18 | 78  | 64  | 55  | 44  | 64  | 59  |
| SMMPA01684 | 6  | 4  | 6  | 17  | 20  | 11  | 15  | 13  | 10  |

|            |    |    |    |     |     |     |     |     |     |
|------------|----|----|----|-----|-----|-----|-----|-----|-----|
| SMMPA01685 | 6  | 8  | 12 | 75  | 88  | 68  | 31  | 56  | 49  |
| SMMPA01686 | 15 | 17 | 22 | 37  | 36  | 30  | 28  | 42  | 38  |
| SMMPA01687 | 15 | 13 | 13 | 41  | 42  | 29  | 30  | 34  | 27  |
| SMMPA01688 | 22 | 26 | 25 | 40  | 39  | 42  | 39  | 54  | 53  |
| SMMPA01689 | 10 | 6  | 9  | 27  | 43  | 22  | 18  | 28  | 30  |
| SMMPA01690 | 14 | 12 | 15 | 46  | 32  | 35  | 40  | 50  | 39  |
| SMMPA01691 | 23 | 16 | 11 | 184 | 149 | 112 | 71  | 98  | 88  |
| SMMPA01692 | 38 | 43 | 39 | 142 | 158 | 117 | 78  | 95  | 92  |
| SMMPA01693 | 21 | 23 | 21 | 44  | 39  | 48  | 36  | 51  | 36  |
| SMMPA01694 | 10 | 15 | 17 | 89  | 73  | 66  | 25  | 57  | 53  |
| SMMPA01695 | 17 | 11 | 16 | 55  | 49  | 35  | 26  | 37  | 37  |
| SMMPA01696 | 53 | 42 | 39 | 148 | 131 | 131 | 81  | 84  | 92  |
| SMMPA01697 | 26 | 27 | 24 | 85  | 92  | 83  | 67  | 93  | 76  |
| SMMPA01698 | 47 | 24 | 41 | 282 | 282 | 205 | 150 | 223 | 188 |
| SMMPA01699 | 35 | 22 | 26 | 148 | 121 | 109 | 69  | 92  | 93  |
| SMMPA01700 | 48 | 42 | 41 | 115 | 100 | 71  | 58  | 68  | 71  |
| SMMPA01701 | 47 | 37 | 39 | 325 | 258 | 215 | 113 | 170 | 143 |
| SMMPA01702 | 14 | 8  | 13 | 329 | 267 | 270 | 155 | 238 | 202 |
| SMMPA01703 | 15 | 15 | 11 | 128 | 140 | 110 | 55  | 73  | 65  |
| SMMPA01704 | 9  | 10 | 8  | 59  | 64  | 46  | 29  | 60  | 48  |
| SMMPA01705 | 18 | 17 | 15 | 238 | 220 | 234 | 90  | 119 | 109 |
| SMMPA01706 | 16 | 21 | 9  | 137 | 107 | 90  | 52  | 59  | 65  |
| SMMPA01707 | 15 | 16 | 7  | 85  | 87  | 95  | 46  | 65  | 65  |
| SMMPA01708 | 13 | 20 | 20 | 103 | 101 | 77  | 40  | 65  | 57  |
| SMMPA01709 | 19 | 12 | 25 | 253 | 228 | 154 | 104 | 125 | 133 |
| SMMPA01710 | 34 | 26 | 29 | 92  | 94  | 65  | 62  | 106 | 100 |
| SMMPA01711 | 34 | 43 | 49 | 197 | 175 | 142 | 87  | 126 | 127 |
| SMMPA01712 | 25 | 27 | 22 | 290 | 238 | 194 | 149 | 194 | 182 |
| SMMPA01713 | 9  | 23 | 18 | 114 | 110 | 65  | 43  | 63  | 58  |
| SMMPA01714 | 34 | 47 | 45 | 35  | 22  | 27  | 41  | 57  | 61  |
| SMMPA01715 | 5  | 5  | 4  | 4   | 3   | 2   | 7   | 8   | 6   |
| SMMPA01716 | 20 | 20 | 12 | 30  | 28  | 26  | 14  | 27  | 27  |
| SMMPA01717 | 37 | 32 | 33 | 47  | 43  | 37  | 43  | 49  | 50  |
| SMMPA01718 | 26 | 18 | 20 | 30  | 20  | 23  | 27  | 33  | 37  |
| SMMPA01719 | 27 | 18 | 19 | 51  | 36  | 31  | 21  | 33  | 44  |
| SMMPA01720 | 27 | 26 | 18 | 35  | 45  | 34  | 37  | 55  | 55  |
| SMMPA01721 | 15 | 16 | 13 | 16  | 12  | 14  | 18  | 30  | 12  |
| SMMPA01722 | 28 | 17 | 28 | 31  | 30  | 30  | 18  | 36  | 42  |
| SMMPA01723 | 13 | 17 | 18 | 33  | 37  | 27  | 31  | 33  | 41  |
| SMMPA01724 | 23 | 27 | 23 | 45  | 41  | 34  | 31  | 47  | 53  |
| SMMPA01725 | 15 | 19 | 12 | 10  | 9   | 6   | 21  | 12  | 27  |

|            |    |    |    |     |     |     |     |     |     |
|------------|----|----|----|-----|-----|-----|-----|-----|-----|
| SMMPA01726 | 30 | 15 | 20 | 37  | 31  | 26  | 30  | 28  | 56  |
| SMMPA01727 | 14 | 10 | 10 | 7   | 6   | 8   | 9   | 9   | 14  |
| SMMPA01728 | 13 | 9  | 7  | 12  | 9   | 10  | 11  | 16  | 20  |
| SMMPA01729 | 11 | 15 | 12 | 27  | 22  | 24  | 25  | 26  | 14  |
| SMMPA01730 | 24 | 21 | 22 | 19  | 34  | 18  | 19  | 34  | 36  |
| SMMPA01731 | 19 | 34 | 23 | 33  | 22  | 19  | 20  | 39  | 32  |
| SMMPA01732 | 21 | 25 | 20 | 16  | 14  | 15  | 19  | 25  | 28  |
| SMMPA01733 | 22 | 20 | 31 | 14  | 18  | 9   | 27  | 22  | 39  |
| SMMPA01734 | 17 | 24 | 18 | 17  | 8   | 13  | 21  | 26  | 21  |
| SMMPA01735 | 21 | 16 | 10 | 293 | 277 | 228 | 89  | 123 | 96  |
| SMMPA01736 | 13 | 11 | 10 | 20  | 21  | 17  | 28  | 26  | 40  |
| SMMPA01737 | 17 | 18 | 14 | 46  | 45  | 36  | 28  | 55  | 46  |
| SMMPA01738 | 13 | 13 | 15 | 64  | 69  | 49  | 35  | 53  | 53  |
| SMMPA01739 | 17 | 14 | 11 | 39  | 34  | 28  | 39  | 54  | 43  |
| SMMPA01740 | 8  | 10 | 12 | 28  | 26  | 23  | 25  | 21  | 34  |
| SMMPA01741 | 7  | 7  | 3  | 145 | 144 | 128 | 64  | 75  | 61  |
| SMMPA01742 | 15 | 23 | 14 | 43  | 38  | 27  | 41  | 33  | 39  |
| SMMPA01743 | 20 | 19 | 19 | 49  | 39  | 28  | 20  | 41  | 41  |
| SMMPA01744 | 21 | 22 | 22 | 32  | 29  | 31  | 24  | 28  | 29  |
| SMMPA01745 | 17 | 24 | 15 | 37  | 31  | 32  | 33  | 37  | 58  |
| SMMPA01746 | 15 | 15 | 9  | 33  | 34  | 28  | 28  | 37  | 31  |
| SMMPA01747 | 15 | 13 | 12 | 476 | 454 | 377 | 204 | 251 | 229 |
| SMMPA01748 | 16 | 34 | 29 | 103 | 100 | 76  | 47  | 67  | 61  |
| SMMPA01749 | 14 | 16 | 9  | 64  | 60  | 52  | 24  | 25  | 42  |
| SMMPA01750 | 32 | 26 | 24 | 86  | 58  | 68  | 62  | 70  | 63  |
| SMMPA01751 | 13 | 22 | 23 | 59  | 46  | 33  | 29  | 38  | 35  |
| SMMPA01752 | 23 | 23 | 16 | 31  | 26  | 35  | 18  | 27  | 26  |
| SMMPA01753 | 42 | 29 | 49 | 23  | 26  | 20  | 26  | 36  | 48  |
| SMMPA01754 | 10 | 7  | 16 | 9   | 10  | 5   | 15  | 28  | 23  |
| SMMPA01755 | 10 | 9  | 12 | 8   | 5   | 5   | 12  | 15  | 22  |
| SMMPA01756 | 23 | 33 | 28 | 53  | 42  | 40  | 38  | 46  | 57  |
| SMMPA01757 | 20 | 28 | 27 | 27  | 25  | 25  | 34  | 43  | 37  |
| SMMPA01758 | 24 | 26 | 20 | 49  | 32  | 30  | 28  | 47  | 40  |
| SMMPA01759 | 12 | 12 | 12 | 8   | 4   | 2   | 13  | 18  | 18  |
| SMMPA01760 | 24 | 32 | 22 | 17  | 27  | 15  | 31  | 46  | 47  |
| SMMPA01761 | 44 | 43 | 33 | 56  | 52  | 46  | 49  | 82  | 70  |
| SMMPA01762 | 26 | 23 | 19 | 143 | 158 | 115 | 84  | 105 | 96  |
| SMMPA01763 | 4  | 6  | 9  | 21  | 28  | 15  | 23  | 31  | 19  |
| SMMPA01764 | 9  | 17 | 15 | 236 | 202 | 151 | 119 | 163 | 138 |
| SMMPA01765 | 17 | 25 | 23 | 128 | 125 | 90  | 84  | 73  | 76  |
| SMMPA01766 | 23 | 18 | 17 | 98  | 99  | 73  | 47  | 67  | 57  |

|            |    |    |    |     |     |     |     |     |     |
|------------|----|----|----|-----|-----|-----|-----|-----|-----|
| SMMPA01767 | 32 | 29 | 32 | 229 | 200 | 170 | 100 | 147 | 128 |
| SMMPA01768 | 16 | 14 | 12 | 44  | 58  | 46  | 45  | 61  | 54  |
| SMMPA01769 | 4  | 2  | 3  | 8   | 3   | 5   | 9   | 12  | 7   |
| SMMPA01770 | 18 | 22 | 15 | 101 | 112 | 87  | 94  | 88  | 90  |
| SMMPA01771 | 32 | 20 | 27 | 113 | 97  | 81  | 69  | 113 | 77  |
| SMMPA01772 | 38 | 33 | 28 | 61  | 36  | 42  | 32  | 45  | 55  |
| SMMPA01773 | 24 | 24 | 17 | 36  | 33  | 15  | 28  | 34  | 29  |
| SMMPA01774 | 15 | 6  | 9  | 5   | 8   | 6   | 7   | 16  | 15  |
| SMMPA01775 | 21 | 37 | 24 | 151 | 130 | 129 | 51  | 84  | 72  |
| SMMPA01776 | 40 | 40 | 26 | 295 | 243 | 175 | 88  | 108 | 93  |
| SMMPA01777 | 29 | 18 | 25 | 25  | 23  | 26  | 31  | 30  | 22  |
| SMMPA01778 | 20 | 16 | 12 | 18  | 19  | 14  | 20  | 29  | 31  |
| SMMPA01779 | 19 | 18 | 23 | 50  | 40  | 45  | 35  | 54  | 44  |
| SMMPA01780 | 24 | 26 | 28 | 60  | 60  | 48  | 31  | 57  | 34  |
| SMMPA01781 | 20 | 16 | 20 | 77  | 48  | 40  | 37  | 74  | 65  |
| SMMPA01782 | 10 | 17 | 13 | 126 | 112 | 104 | 60  | 92  | 86  |
| SMMPA01783 | 9  | 10 | 10 | 8   | 6   | 10  | 10  | 16  | 19  |
| SMMPA01784 | 14 | 9  | 13 | 31  | 21  | 20  | 16  | 26  | 34  |
| SMMPA01785 | 19 | 27 | 14 | 33  | 25  | 40  | 34  | 41  | 40  |
| SMMPA01786 | 7  | 5  | 5  | 8   | 10  | 8   | 6   | 12  | 16  |
| SMMPA01787 | 5  | 4  | 8  | 23  | 15  | 9   | 8   | 12  | 10  |
| SMMPA01788 | 21 | 9  | 24 | 20  | 21  | 20  | 19  | 22  | 18  |
| SMMPA01789 | 20 | 18 | 8  | 35  | 20  | 32  | 22  | 30  | 29  |
| SMMPA01790 | 8  | 5  | 9  | 10  | 5   | 7   | 4   | 11  | 7   |
| SMMPA01791 | 10 | 17 | 7  | 17  | 22  | 18  | 11  | 18  | 24  |
| SMMPA01792 | 20 | 14 | 18 | 29  | 17  | 26  | 24  | 25  | 37  |
| SMMPA01793 | 27 | 32 | 26 | 24  | 24  | 28  | 25  | 35  | 34  |
| SMMPA01794 | 26 | 15 | 23 | 47  | 47  | 24  | 20  | 31  | 32  |
| SMMPA01795 | 3  | 6  | 4  | 5   | 11  | 6   | 6   | 4   | 10  |
| SMMPA01796 | 25 | 25 | 24 | 34  | 23  | 25  | 26  | 32  | 37  |
| SMMPA01797 | 19 | 9  | 5  | 10  | 5   | 9   | 11  | 15  | 8   |
| SMMPA01798 | 7  | 10 | 7  | 10  | 11  | 11  | 15  | 16  | 15  |
| SMMPA01799 | 5  | 2  | 4  | 2   | 6   | 4   | 7   | 10  | 12  |
| SMMPA01800 | 12 | 16 | 11 | 14  | 5   | 4   | 17  | 25  | 17  |
| SMMPA01801 | 5  | 10 | 8  | 1   | 5   | 2   | 8   | 7   | 7   |
| SMMPA01802 | 21 | 10 | 11 | 23  | 15  | 20  | 22  | 35  | 28  |
| SMMPA01803 | 10 | 11 | 7  | 6   | 8   | 3   | 13  | 15  | 15  |
| SMMPA01804 | 20 | 21 | 16 | 21  | 18  | 21  | 17  | 26  | 39  |
| SMMPA01805 | 6  | 12 | 12 | 16  | 18  | 12  | 11  | 13  | 28  |
| SMMPA01806 | 15 | 12 | 8  | 35  | 46  | 26  | 25  | 24  | 37  |
| SMMPA01807 | 78 | 84 | 68 | 68  | 53  | 66  | 83  | 91  | 122 |

|            |    |    |    |    |     |    |    |    |    |
|------------|----|----|----|----|-----|----|----|----|----|
| SMMPA01808 | 7  | 16 | 9  | 15 | 13  | 22 | 16 | 25 | 16 |
| SMMPA01809 | 27 | 20 | 20 | 46 | 49  | 35 | 26 | 28 | 34 |
| SMMPA01810 | 24 | 23 | 18 | 47 | 50  | 54 | 47 | 44 | 43 |
| SMMPA01811 | 54 | 75 | 59 | 88 | 89  | 85 | 79 | 86 | 81 |
| SMMPA01812 | 27 | 27 | 18 | 50 | 45  | 40 | 28 | 43 | 40 |
| SMMPA01813 | 29 | 16 | 26 | 90 | 96  | 62 | 50 | 64 | 78 |
| SMMPA01814 | 17 | 13 | 8  | 47 | 58  | 33 | 22 | 40 | 26 |
| SMMPA01815 | 21 | 15 | 17 | 23 | 29  | 30 | 26 | 26 | 39 |
| SMMPA01816 | 19 | 24 | 13 | 40 | 39  | 34 | 32 | 34 | 33 |
| SMMPA01817 | 16 | 8  | 15 | 21 | 12  | 14 | 16 | 24 | 21 |
| SMMPA01818 | 15 | 20 | 19 | 50 | 42  | 35 | 39 | 38 | 37 |
| SMMPA01819 | 15 | 14 | 13 | 17 | 28  | 28 | 21 | 17 | 23 |
| SMMPA01820 | 7  | 9  | 9  | 8  | 13  | 10 | 12 | 20 | 18 |
| SMMPA01821 | 20 | 16 | 15 | 13 | 16  | 12 | 22 | 27 | 21 |
| SMMPA01822 | 6  | 9  | 8  | 10 | 11  | 8  | 16 | 13 | 21 |
| SMMPA01823 | 34 | 28 | 19 | 95 | 99  | 80 | 45 | 53 | 66 |
| SMMPA01824 | 36 | 34 | 21 | 95 | 100 | 70 | 52 | 81 | 50 |
| SMMPA01825 | 16 | 19 | 13 | 53 | 57  | 37 | 30 | 42 | 38 |
| SMMPA01826 | 27 | 27 | 14 | 77 | 52  | 52 | 53 | 64 | 54 |
| SMMPA01827 | 29 | 36 | 22 | 90 | 94  | 71 | 44 | 54 | 65 |
| SMMPA01828 | 16 | 15 | 14 | 30 | 39  | 28 | 38 | 44 | 44 |
| SMMPA01829 | 19 | 25 | 24 | 20 | 17  | 13 | 24 | 28 | 26 |
| SMMPA01830 | 14 | 24 | 18 | 99 | 100 | 75 | 55 | 73 | 61 |
| SMMPA01831 | 20 | 15 | 15 | 22 | 11  | 20 | 22 | 32 | 31 |
| SMMPA01832 | 25 | 26 | 11 | 22 | 18  | 25 | 20 | 36 | 37 |
| SMMPA01833 | 23 | 18 | 30 | 24 | 15  | 18 | 27 | 34 | 36 |
| SMMPA01834 | 12 | 12 | 16 | 13 | 9   | 8  | 12 | 17 | 11 |
| SMMPA01835 | 20 | 17 | 19 | 37 | 21  | 29 | 25 | 23 | 28 |
| SMMPA01836 | 20 | 10 | 23 | 22 | 16  | 12 | 27 | 36 | 27 |
| SMMPA01837 | 18 | 15 | 15 | 16 | 16  | 11 | 8  | 16 | 23 |
| SMMPA01838 | 10 | 8  | 7  | 7  | 7   | 11 | 10 | 9  | 8  |
| SMMPA01839 | 25 | 25 | 22 | 71 | 45  | 55 | 36 | 47 | 33 |
| SMMPA01840 | 5  | 5  | 1  | 4  | 2   | 3  | 1  | 3  | 5  |
| SMMPA01841 | 18 | 19 | 19 | 70 | 64  | 46 | 34 | 42 | 39 |
| SMMPA01842 | 17 | 14 | 20 | 38 | 30  | 28 | 23 | 27 | 30 |
| SMMPA01843 | 15 | 24 | 25 | 75 | 71  | 64 | 41 | 61 | 64 |
| SMMPA01844 | 13 | 12 | 11 | 79 | 87  | 74 | 37 | 43 | 39 |
| SMMPA01845 | 10 | 5  | 4  | 15 | 10  | 13 | 10 | 11 | 8  |
| SMMPA01846 | 8  | 6  | 10 | 7  | 8   | 8  | 4  | 8  | 9  |
| SMMPA01847 | 18 | 12 | 7  | 11 | 6   | 8  | 17 | 18 | 13 |
| SMMPA01848 | 22 | 20 | 16 | 8  | 14  | 14 | 15 | 13 | 25 |

|            |    |    |    |     |     |     |     |     |     |
|------------|----|----|----|-----|-----|-----|-----|-----|-----|
| SMMPA01849 | 67 | 65 | 59 | 146 | 109 | 95  | 68  | 73  | 76  |
| SMMPA01850 | 29 | 21 | 9  | 17  | 15  | 31  | 21  | 42  | 34  |
| SMMPA01851 | 3  | 10 | 5  | 6   | 10  | 9   | 5   | 6   | 14  |
| SMMPA01852 | 45 | 43 | 36 | 46  | 38  | 34  | 55  | 60  | 52  |
| SMMPA01853 | 18 | 15 | 16 | 16  | 8   | 18  | 12  | 23  | 23  |
| SMMPA01854 | 24 | 20 | 22 | 21  | 17  | 13  | 25  | 28  | 33  |
| SMMPA01855 | 17 | 22 | 24 | 25  | 19  | 22  | 27  | 21  | 26  |
| SMMPA01856 | 25 | 19 | 19 | 21  | 26  | 28  | 23  | 32  | 21  |
| SMMPA01857 | 15 | 17 | 12 | 42  | 50  | 41  | 28  | 39  | 31  |
| SMMPA01858 | 12 | 7  | 12 | 17  | 13  | 14  | 15  | 21  | 12  |
| SMMPA01859 | 13 | 14 | 14 | 25  | 34  | 19  | 19  | 24  | 33  |
| SMMPA01860 | 19 | 21 | 24 | 321 | 233 | 174 | 130 | 151 | 133 |
| SMMPA01861 | 12 | 19 | 15 | 50  | 59  | 36  | 53  | 59  | 58  |
| SMMPA01862 | 8  | 11 | 6  | 43  | 47  | 42  | 27  | 28  | 29  |
| SMMPA01863 | 27 | 13 | 15 | 68  | 49  | 36  | 39  | 61  | 45  |
| SMMPA01864 | 17 | 23 | 15 | 30  | 25  | 30  | 29  | 37  | 46  |
| SMMPA01865 | 16 | 13 | 14 | 23  | 17  | 24  | 25  | 43  | 20  |
| SMMPA01866 | 25 | 31 | 24 | 78  | 89  | 82  | 54  | 52  | 53  |
| SMMPA01867 | 32 | 48 | 35 | 159 | 134 | 113 | 71  | 79  | 92  |
| SMMPA01868 | 7  | 15 | 14 | 101 | 78  | 75  | 40  | 60  | 55  |
| SMMPA01869 | 18 | 24 | 24 | 57  | 57  | 36  | 23  | 34  | 32  |
| SMMPA01870 | 20 | 15 | 15 | 25  | 38  | 26  | 28  | 37  | 30  |
| SMMPA01871 | 14 | 23 | 15 | 24  | 34  | 23  | 32  | 37  | 37  |
| SMMPA01872 | 19 | 14 | 16 | 20  | 25  | 21  | 24  | 37  | 39  |
| SMMPA01873 | 16 | 12 | 13 | 18  | 17  | 15  | 14  | 21  | 20  |
| SMMPA01874 | 19 | 23 | 12 | 24  | 28  | 29  | 26  | 24  | 35  |
| SMMPA01875 | 23 | 18 | 24 | 40  | 38  | 33  | 46  | 57  | 39  |
| SMMPA01876 | 27 | 23 | 18 | 106 | 68  | 80  | 64  | 92  | 97  |
| SMMPA01877 | 24 | 18 | 12 | 28  | 21  | 24  | 26  | 36  | 34  |
| SMMPA01878 | 9  | 7  | 7  | 9   | 6   | 8   | 15  | 6   | 9   |
| SMMPA01879 | 26 | 27 | 20 | 33  | 38  | 18  | 21  | 33  | 35  |
| SMMPA01880 | 17 | 14 | 13 | 18  | 12  | 12  | 19  | 22  | 16  |
| SMMPA01881 | 11 | 4  | 7  | 4   | 10  | 9   | 11  | 14  | 7   |
| SMMPA01882 | 24 | 28 | 16 | 36  | 55  | 46  | 29  | 28  | 32  |
| SMMPA01883 | 14 | 11 | 19 | 18  | 20  | 14  | 24  | 24  | 18  |
| SMMPA01884 | 6  | 18 | 12 | 24  | 12  | 22  | 17  | 22  | 14  |
| SMMPA01885 | 15 | 12 | 15 | 85  | 73  | 54  | 25  | 37  | 39  |
| SMMPA01886 | 25 | 18 | 17 | 78  | 85  | 63  | 33  | 51  | 52  |
| SMMPA01887 | 14 | 11 | 8  | 30  | 26  | 16  | 17  | 21  | 23  |
| SMMPA01888 | 18 | 23 | 12 | 102 | 92  | 64  | 25  | 35  | 52  |
| SMMPA01889 | 20 | 31 | 23 | 136 | 121 | 110 | 51  | 76  | 67  |

|            |    |     |    |     |     |     |     |     |     |
|------------|----|-----|----|-----|-----|-----|-----|-----|-----|
| SMMPA01890 | 8  | 5   | 7  | 58  | 44  | 40  | 9   | 18  | 16  |
| SMMPA01891 | 4  | 3   | 3  | 69  | 102 | 119 | 23  | 24  | 32  |
| SMMPA01892 | 31 | 35  | 24 | 45  | 44  | 34  | 30  | 31  | 38  |
| SMMPA01893 | 16 | 9   | 16 | 34  | 23  | 17  | 27  | 49  | 46  |
| SMMPA01894 | 30 | 31  | 21 | 147 | 118 | 114 | 92  | 108 | 103 |
| SMMPA01895 | 18 | 19  | 26 | 93  | 92  | 83  | 58  | 87  | 92  |
| SMMPA01896 | 14 | 17  | 18 | 73  | 57  | 52  | 39  | 49  | 53  |
| SMMPA01897 | 18 | 18  | 20 | 126 | 114 | 99  | 91  | 114 | 102 |
| SMMPA01898 | 22 | 11  | 17 | 20  | 34  | 20  | 23  | 40  | 35  |
| SMMPA01899 | 12 | 10  | 13 | 43  | 33  | 31  | 31  | 36  | 33  |
| SMMPA01900 | 22 | 18  | 13 | 34  | 39  | 38  | 18  | 40  | 32  |
| SMMPA01901 | 40 | 47  | 31 | 60  | 53  | 37  | 39  | 51  | 65  |
| SMMPA01902 | 7  | 4   | 12 | 22  | 11  | 15  | 19  | 18  | 26  |
| SMMPA01903 | 11 | 15  | 22 | 74  | 54  | 35  | 29  | 30  | 25  |
| SMMPA01904 | 7  | 6   | 8  | 38  | 43  | 38  | 18  | 24  | 24  |
| SMMPA01905 | 19 | 25  | 8  | 19  | 19  | 20  | 25  | 22  | 28  |
| SMMPA01906 | 7  | 1   | 2  | 3   | 7   | 5   | 0   | 4   | 1   |
| SMMPA01907 | 4  | 3   | 7  | 11  | 6   | 8   | 4   | 10  | 9   |
| SMMPA01908 | 17 | 19  | 13 | 15  | 14  | 9   | 18  | 32  | 14  |
| SMMPA01909 | 2  | 4   | 2  | 5   | 11  | 12  | 6   | 12  | 7   |
| SMMPA01910 | 29 | 26  | 25 | 356 | 392 | 229 | 90  | 111 | 110 |
| SMMPA01911 | 15 | 19  | 17 | 445 | 324 | 271 | 202 | 246 | 239 |
| SMMPA01912 | 99 | 101 | 80 | 134 | 127 | 116 | 108 | 112 | 142 |
| SMMPA01913 | 16 | 19  | 18 | 81  | 52  | 56  | 36  | 47  | 41  |
| SMMPA01914 | 17 | 23  | 14 | 221 | 217 | 168 | 76  | 123 | 91  |
| SMMPA01915 | 22 | 24  | 18 | 136 | 132 | 99  | 52  | 101 | 85  |
| SMMPA01916 | 10 | 11  | 11 | 40  | 37  | 21  | 22  | 20  | 26  |
| SMMPA01917 | 27 | 38  | 22 | 375 | 347 | 301 | 114 | 157 | 117 |
| SMMPA01918 | 23 | 26  | 20 | 105 | 89  | 64  | 33  | 55  | 46  |
| SMMPA01919 | 29 | 30  | 29 | 146 | 166 | 112 | 61  | 96  | 76  |
| SMMPA01920 | 14 | 16  | 15 | 35  | 39  | 34  | 18  | 30  | 25  |
| SMMPA01921 | 23 | 26  | 20 | 73  | 65  | 57  | 40  | 49  | 40  |
| SMMPA01922 | 17 | 20  | 19 | 95  | 84  | 68  | 52  | 63  | 54  |
| SMMPA01923 | 20 | 19  | 16 | 29  | 23  | 24  | 22  | 29  | 42  |
| SMMPA01924 | 20 | 15  | 17 | 20  | 23  | 14  | 24  | 22  | 30  |
| SMMPA01925 | 21 | 26  | 22 | 37  | 37  | 42  | 46  | 36  | 47  |
| SMMPA01926 | 17 | 17  | 12 | 21  | 20  | 27  | 18  | 25  | 31  |
| SMMPA01927 | 19 | 17  | 16 | 53  | 49  | 34  | 37  | 43  | 49  |
| SMMPA01928 | 12 | 14  | 13 | 29  | 18  | 26  | 19  | 36  | 26  |
| SMMPA01929 | 22 | 13  | 8  | 20  | 18  | 25  | 21  | 24  | 20  |
| SMMPA01930 | 20 | 31  | 20 | 61  | 59  | 52  | 24  | 33  | 36  |



|            |    |    |    |     |     |     |     |     |     |
|------------|----|----|----|-----|-----|-----|-----|-----|-----|
| SMMPA01931 | 20 | 19 | 26 | 27  | 47  | 35  | 16  | 13  | 21  |
| SMMPA01932 | 15 | 10 | 12 | 30  | 31  | 17  | 21  | 15  | 22  |
| SMMPA01933 | 27 | 40 | 24 | 68  | 69  | 71  | 30  | 53  | 55  |
| SMMPA01934 | 57 | 60 | 48 | 193 | 213 | 172 | 79  | 118 | 91  |
| SMMPA01935 | 21 | 13 | 13 | 22  | 32  | 26  | 13  | 23  | 12  |
| SMMPA01936 | 7  | 9  | 14 | 7   | 9   | 18  | 8   | 12  | 20  |
| SMMPA01937 | 40 | 24 | 18 | 64  | 54  | 44  | 33  | 38  | 52  |
| SMMPA01938 | 23 | 17 | 26 | 34  | 33  | 37  | 10  | 39  | 29  |
| SMMPA01939 | 21 | 35 | 29 | 39  | 47  | 58  | 21  | 39  | 25  |
| SMMPA01940 | 24 | 14 | 12 | 999 | 835 | 828 | 463 | 633 | 546 |
| SMMPA01941 | 30 | 19 | 23 | 500 | 409 | 383 | 246 | 318 | 295 |
| SMMPA01942 | 40 | 35 | 28 | 86  | 85  | 74  | 64  | 93  | 81  |
| SMMPA01943 | 15 | 15 | 17 | 29  | 20  | 23  | 25  | 37  | 28  |
| SMMPA01944 | 15 | 21 | 14 | 215 | 183 | 149 | 119 | 157 | 116 |
| SMMPA01945 | 27 | 44 | 32 | 88  | 82  | 80  | 88  | 96  | 80  |
| SMMPA01946 | 6  | 10 | 3  | 16  | 16  | 12  | 9   | 18  | 21  |
| SMMPA01947 | 12 | 14 | 19 | 15  | 12  | 16  | 23  | 27  | 24  |
| SMMPA01948 | 5  | 8  | 5  | 3   | 6   | 10  | 11  | 10  | 16  |
| SMMPA01949 | 14 | 9  | 13 | 12  | 17  | 17  | 7   | 15  | 19  |
| SMMPA01950 | 21 | 13 | 17 | 11  | 18  | 15  | 22  | 19  | 27  |
| SMMPA01951 | 14 | 17 | 6  | 4   | 6   | 10  | 10  | 18  | 15  |
| SMMPA01952 | 17 | 9  | 13 | 14  | 12  | 11  | 16  | 31  | 24  |
| SMMPA01953 | 15 | 20 | 14 | 30  | 30  | 21  | 28  | 23  | 31  |
| SMMPA01954 | 27 | 26 | 19 | 44  | 36  | 31  | 30  | 18  | 42  |
| SMMPA01955 | 16 | 20 | 28 | 27  | 31  | 20  | 21  | 27  | 21  |
| SMMPA01956 | 11 | 20 | 12 | 13  | 22  | 16  | 21  | 30  | 25  |
| SMMPA01957 | 22 | 27 | 16 | 30  | 24  | 17  | 33  | 36  | 43  |
| SMMPA01958 | 30 | 33 | 37 | 61  | 43  | 44  | 41  | 52  | 39  |
| SMMPA01959 | 21 | 19 | 24 | 18  | 17  | 25  | 29  | 28  | 23  |
| SMMPA01960 | 27 | 21 | 20 | 70  | 77  | 55  | 43  | 59  | 54  |
| SMMPA01961 | 36 | 27 | 19 | 24  | 32  | 31  | 25  | 40  | 27  |
| SMMPA01962 | 21 | 27 | 25 | 35  | 29  | 20  | 32  | 34  | 47  |
| SMMPA01963 | 4  | 4  | 4  | 17  | 11  | 17  | 5   | 8   | 11  |
| SMMPA01964 | 16 | 16 | 13 | 13  | 22  | 13  | 20  | 15  | 19  |
| SMMPA01965 | 19 | 22 | 26 | 13  | 18  | 15  | 23  | 21  | 28  |
| SMMPA01966 | 8  | 19 | 14 | 23  | 14  | 16  | 28  | 19  | 19  |
| SMMPA01967 | 38 | 37 | 39 | 86  | 62  | 57  | 108 | 128 | 104 |
| SMMPA01968 | 19 | 30 | 17 | 55  | 48  | 34  | 30  | 49  | 52  |
| SMMPA01969 | 13 | 9  | 18 | 17  | 15  | 16  | 14  | 17  | 12  |
| SMMPA01970 | 22 | 22 | 22 | 51  | 40  | 43  | 25  | 27  | 33  |
| SMMPA01971 | 12 | 15 | 17 | 25  | 32  | 24  | 18  | 30  | 23  |

|            |    |    |    |     |     |     |    |     |     |
|------------|----|----|----|-----|-----|-----|----|-----|-----|
| SMMPA01972 | 17 | 14 | 18 | 44  | 39  | 43  | 35 | 42  | 48  |
| SMMPA01973 | 14 | 17 | 13 | 31  | 53  | 46  | 23 | 35  | 30  |
| SMMPA01974 | 11 | 23 | 18 | 45  | 42  | 35  | 22 | 40  | 27  |
| SMMPA01975 | 28 | 23 | 29 | 49  | 50  | 50  | 40 | 59  | 48  |
| SMMPA01976 | 12 | 19 | 17 | 42  | 47  | 38  | 26 | 34  | 29  |
| SMMPA01977 | 19 | 25 | 23 | 88  | 91  | 66  | 40 | 66  | 49  |
| SMMPA01978 | 28 | 23 | 23 | 63  | 74  | 51  | 40 | 50  | 55  |
| SMMPA01979 | 11 | 16 | 8  | 13  | 27  | 16  | 11 | 29  | 25  |
| SMMPA01980 | 22 | 20 | 17 | 35  | 51  | 22  | 22 | 35  | 28  |
| SMMPA01981 | 19 | 13 | 22 | 27  | 19  | 18  | 21 | 29  | 30  |
| SMMPA01982 | 8  | 9  | 10 | 8   | 9   | 9   | 9  | 18  | 21  |
| SMMPA01983 | 21 | 19 | 16 | 35  | 43  | 32  | 38 | 48  | 41  |
| SMMPA01984 | 4  | 11 | 14 | 12  | 10  | 8   | 10 | 27  | 33  |
| SMMPA01985 | 21 | 15 | 13 | 45  | 27  | 32  | 24 | 36  | 28  |
| SMMPA01986 | 26 | 33 | 29 | 80  | 53  | 49  | 35 | 42  | 49  |
| SMMPA01987 | 16 | 18 | 18 | 39  | 46  | 24  | 18 | 31  | 31  |
| SMMPA01988 | 24 | 32 | 24 | 46  | 46  | 39  | 17 | 46  | 36  |
| SMMPA01989 | 37 | 42 | 23 | 49  | 46  | 37  | 31 | 42  | 38  |
| SMMPA01990 | 24 | 34 | 29 | 55  | 46  | 50  | 39 | 41  | 47  |
| SMMPA01991 | 10 | 22 | 16 | 56  | 53  | 29  | 37 | 41  | 39  |
| SMMPA01992 | 38 | 32 | 35 | 38  | 30  | 26  | 45 | 53  | 61  |
| SMMPA01993 | 33 | 29 | 45 | 53  | 44  | 46  | 55 | 74  | 72  |
| SMMPA01994 | 19 | 24 | 19 | 30  | 18  | 24  | 22 | 27  | 30  |
| SMMPA01995 | 15 | 18 | 10 | 20  | 12  | 11  | 14 | 20  | 19  |
| SMMPA01996 | 21 | 25 | 18 | 62  | 53  | 50  | 36 | 57  | 59  |
| SMMPA01997 | 17 | 12 | 15 | 20  | 17  | 23  | 20 | 28  | 39  |
| SMMPA01998 | 28 | 17 | 16 | 31  | 21  | 30  | 20 | 24  | 24  |
| SMMPA01999 | 24 | 28 | 10 | 113 | 98  | 80  | 52 | 101 | 77  |
| SMMPA02000 | 23 | 27 | 30 | 91  | 78  | 72  | 41 | 50  | 48  |
| SMMPA02001 | 26 | 23 | 19 | 72  | 59  | 36  | 33 | 46  | 38  |
| SMMPA02002 | 11 | 11 | 11 | 47  | 42  | 25  | 55 | 63  | 51  |
| SMMPA02003 | 14 | 12 | 18 | 52  | 51  | 56  | 47 | 56  | 62  |
| SMMPA02004 | 15 | 17 | 15 | 39  | 29  | 24  | 27 | 21  | 31  |
| SMMPA02005 | 15 | 18 | 15 | 134 | 121 | 83  | 87 | 103 | 101 |
| SMMPA02006 | 16 | 23 | 14 | 65  | 44  | 40  | 26 | 43  | 28  |
| SMMPA02007 | 13 | 25 | 15 | 41  | 44  | 35  | 32 | 29  | 33  |
| SMMPA02008 | 2  | 5  | 3  | 11  | 9   | 15  | 7  | 7   | 5   |
| SMMPA02009 | 4  | 14 | 10 | 19  | 21  | 26  | 19 | 22  | 15  |
| SMMPA02010 | 14 | 19 | 10 | 51  | 37  | 47  | 29 | 32  | 32  |
| SMMPA02011 | 12 | 6  | 7  | 13  | 15  | 10  | 13 | 18  | 19  |
| SMMPA02012 | 14 | 23 | 10 | 171 | 157 | 164 | 39 | 60  | 36  |

|            |    |    |    |     |     |     |    |     |     |
|------------|----|----|----|-----|-----|-----|----|-----|-----|
| SMMPA02013 | 14 | 16 | 5  | 153 | 150 | 146 | 54 | 60  | 63  |
| SMMPA02014 | 21 | 16 | 16 | 75  | 83  | 81  | 36 | 43  | 40  |
| SMMPA02015 | 17 | 10 | 8  | 101 | 75  | 90  | 37 | 52  | 39  |
| SMMPA02016 | 21 | 14 | 14 | 97  | 91  | 83  | 36 | 39  | 30  |
| SMMPA02017 | 14 | 18 | 14 | 47  | 51  | 40  | 25 | 31  | 35  |
| SMMPA02018 | 24 | 15 | 12 | 69  | 68  | 67  | 27 | 50  | 24  |
| SMMPA02019 | 41 | 33 | 39 | 114 | 93  | 89  | 67 | 88  | 108 |
| SMMPA02020 | 16 | 24 | 17 | 149 | 138 | 120 | 77 | 122 | 75  |
| SMMPA02021 | 22 | 27 | 23 | 112 | 111 | 81  | 74 | 121 | 115 |
| SMMPA02022 | 23 | 13 | 19 | 96  | 84  | 82  | 74 | 103 | 99  |
| SMMPA02023 | 4  | 6  | 7  | 15  | 14  | 16  | 14 | 28  | 25  |
| SMMPA02024 | 23 | 13 | 20 | 77  | 93  | 52  | 58 | 61  | 79  |
| SMMPA02025 | 14 | 19 | 17 | 56  | 48  | 46  | 50 | 59  | 59  |
| SMMPA02026 | 13 | 18 | 12 | 57  | 57  | 44  | 45 | 54  | 58  |
| SMMPA02027 | 1  | 4  | 5  | 38  | 20  | 25  | 20 | 35  | 22  |
| SMMPA02028 | 16 | 16 | 10 | 29  | 27  | 21  | 33 | 40  | 44  |
| SMMPA02029 | 21 | 29 | 22 | 258 | 303 | 212 | 68 | 103 | 96  |
| SMMPA02030 | 31 | 31 | 30 | 194 | 184 | 160 | 84 | 133 | 94  |
| SMMPA02031 | 46 | 42 | 35 | 116 | 102 | 97  | 62 | 79  | 58  |
| SMMPA02032 | 41 | 60 | 52 | 169 | 113 | 118 | 76 | 88  | 94  |
| SMMPA02033 | 23 | 20 | 10 | 114 | 116 | 86  | 57 | 75  | 61  |
| SMMPA02034 | 13 | 14 | 13 | 24  | 17  | 21  | 16 | 12  | 14  |
| SMMPA02035 | 18 | 36 | 19 | 25  | 29  | 31  | 25 | 33  | 26  |
| SMMPA02036 | 21 | 16 | 23 | 71  | 62  | 61  | 22 | 35  | 38  |
| SMMPA02037 | 17 | 22 | 37 | 97  | 82  | 70  | 39 | 58  | 50  |
| SMMPA02038 | 18 | 24 | 28 | 50  | 48  | 46  | 24 | 34  | 28  |
| SMMPA02039 | 12 | 16 | 15 | 24  | 31  | 29  | 19 | 26  | 23  |
| SMMPA02040 | 8  | 10 | 5  | 18  | 18  | 24  | 23 | 15  | 20  |
| SMMPA02041 | 24 | 12 | 13 | 43  | 46  | 32  | 36 | 48  | 30  |
| SMMPA02042 | 19 | 26 | 14 | 35  | 37  | 31  | 25 | 41  | 40  |
| SMMPA02043 | 26 | 25 | 20 | 37  | 36  | 24  | 44 | 44  | 43  |
| SMMPA02044 | 13 | 12 | 20 | 29  | 24  | 26  | 27 | 43  | 39  |
| SMMPA02045 | 23 | 28 | 13 | 58  | 56  | 48  | 44 | 50  | 45  |
| SMMPA02046 | 15 | 13 | 7  | 15  | 11  | 16  | 16 | 29  | 23  |
| SMMPA02047 | 12 | 15 | 12 | 23  | 16  | 24  | 30 | 30  | 25  |
| SMMPA02048 | 16 | 11 | 9  | 36  | 30  | 20  | 25 | 34  | 21  |
| SMMPA02049 | 12 | 21 | 19 | 37  | 22  | 33  | 18 | 17  | 16  |
| SMMPA02050 | 10 | 12 | 9  | 9   | 24  | 13  | 15 | 12  | 26  |
| SMMPA02051 | 11 | 7  | 1  | 40  | 32  | 27  | 10 | 16  | 14  |
| SMMPA02052 | 21 | 25 | 19 | 59  | 33  | 36  | 41 | 40  | 54  |
| SMMPA02053 | 16 | 17 | 9  | 38  | 48  | 29  | 30 | 38  | 32  |

|            |    |    |    |     |     |     |     |     |     |
|------------|----|----|----|-----|-----|-----|-----|-----|-----|
| SMMPA02054 | 13 | 11 | 12 | 16  | 13  | 8   | 19  | 14  | 20  |
| SMMPA02055 | 61 | 51 | 52 | 63  | 44  | 61  | 64  | 66  | 70  |
| SMMPA02056 | 37 | 43 | 30 | 55  | 48  | 44  | 37  | 60  | 46  |
| SMMPA02057 | 32 | 24 | 24 | 31  | 27  | 33  | 31  | 31  | 31  |
| SMMPA02058 | 29 | 32 | 27 | 40  | 40  | 29  | 22  | 31  | 33  |
| SMMPA02059 | 25 | 19 | 28 | 56  | 54  | 39  | 57  | 48  | 57  |
| SMMPA02060 | 17 | 33 | 35 | 60  | 69  | 47  | 28  | 34  | 47  |
| SMMPA02061 | 16 | 17 | 17 | 25  | 36  | 31  | 47  | 52  | 52  |
| SMMPA02062 | 17 | 24 | 15 | 58  | 36  | 40  | 10  | 18  | 14  |
| SMMPA02063 | 37 | 32 | 25 | 31  | 25  | 40  | 18  | 45  | 26  |
| SMMPA02064 | 27 | 34 | 26 | 77  | 62  | 45  | 51  | 53  | 61  |
| SMMPA02065 | 26 | 39 | 19 | 50  | 71  | 46  | 37  | 48  | 45  |
| SMMPA02066 | 9  | 6  | 9  | 11  | 13  | 12  | 13  | 12  | 12  |
| SMMPA02067 | 15 | 11 | 10 | 30  | 26  | 21  | 22  | 20  | 21  |
| SMMPA02068 | 19 | 21 | 17 | 20  | 19  | 20  | 20  | 19  | 21  |
| SMMPA02069 | 17 | 15 | 18 | 32  | 25  | 18  | 18  | 17  | 21  |
| SMMPA02070 | 2  | 8  | 10 | 12  | 3   | 7   | 18  | 18  | 11  |
| SMMPA02071 | 9  | 7  | 7  | 8   | 7   | 2   | 8   | 14  | 17  |
| SMMPA02072 | 24 | 9  | 21 | 24  | 13  | 13  | 16  | 23  | 24  |
| SMMPA02073 | 9  | 3  | 7  | 11  | 7   | 10  | 14  | 14  | 7   |
| SMMPA02074 | 7  | 11 | 2  | 1   | 1   | 4   | 3   | 11  | 6   |
| SMMPA02075 | 10 | 10 | 4  | 28  | 30  | 27  | 17  | 26  | 21  |
| SMMPA02076 | 15 | 9  | 9  | 24  | 16  | 22  | 11  | 36  | 23  |
| SMMPA02077 | 10 | 6  | 7  | 5   | 11  | 10  | 6   | 8   | 18  |
| SMMPA02078 | 11 | 6  | 7  | 5   | 5   | 10  | 6   | 14  | 16  |
| SMMPA02079 | 13 | 7  | 5  | 13  | 14  | 7   | 7   | 12  | 11  |
| SMMPA02080 | 20 | 12 | 14 | 150 | 95  | 77  | 54  | 68  | 63  |
| SMMPA02081 | 10 | 8  | 5  | 61  | 57  | 47  | 42  | 49  | 65  |
| SMMPA02082 | 6  | 10 | 9  | 37  | 36  | 23  | 23  | 29  | 28  |
| SMMPA02083 | 19 | 25 | 19 | 276 | 233 | 210 | 128 | 150 | 131 |
| SMMPA02084 | 18 | 16 | 20 | 95  | 89  | 78  | 50  | 72  | 69  |
| SMMPA02085 | 17 | 17 | 18 | 135 | 110 | 108 | 68  | 85  | 84  |
| SMMPA02086 | 21 | 20 | 21 | 57  | 51  | 33  | 25  | 30  | 40  |
| SMMPA02087 | 19 | 30 | 20 | 59  | 42  | 51  | 27  | 47  | 36  |
| SMMPA02088 | 7  | 5  | 10 | 12  | 17  | 20  | 13  | 11  | 9   |
| SMMPA02089 | 22 | 23 | 18 | 109 | 90  | 86  | 31  | 52  | 36  |
| SMMPA02090 | 20 | 22 | 19 | 34  | 34  | 31  | 29  | 33  | 31  |
| SMMPA02091 | 12 | 23 | 22 | 150 | 161 | 138 | 63  | 86  | 72  |
| SMMPA02092 | 20 | 23 | 19 | 48  | 41  | 45  | 20  | 37  | 41  |
| SMMPA02093 | 52 | 26 | 32 | 65  | 75  | 62  | 49  | 77  | 74  |
| SMMPA02094 | 17 | 21 | 14 | 31  | 32  | 25  | 25  | 32  | 21  |

|            |    |    |    |     |     |     |    |     |    |
|------------|----|----|----|-----|-----|-----|----|-----|----|
| SMMPA02095 | 12 | 20 | 13 | 18  | 17  | 10  | 18 | 21  | 13 |
| SMMPA02096 | 22 | 25 | 21 | 124 | 83  | 89  | 45 | 55  | 42 |
| SMMPA02097 | 16 | 25 | 17 | 40  | 33  | 35  | 34 | 41  | 36 |
| SMMPA02098 | 21 | 19 | 23 | 115 | 123 | 101 | 49 | 51  | 72 |
| SMMPA02099 | 12 | 10 | 17 | 23  | 37  | 35  | 19 | 27  | 37 |
| SMMPA02100 | 18 | 12 | 27 | 143 | 129 | 100 | 51 | 84  | 72 |
| SMMPA02101 | 19 | 20 | 26 | 84  | 99  | 66  | 35 | 55  | 50 |
| SMMPA02102 | 17 | 16 | 17 | 50  | 77  | 67  | 12 | 31  | 17 |
| SMMPA02103 | 7  | 18 | 16 | 27  | 20  | 19  | 20 | 31  | 36 |
| SMMPA02104 | 34 | 29 | 25 | 43  | 42  | 35  | 45 | 48  | 62 |
| SMMPA02105 | 49 | 70 | 39 | 63  | 68  | 76  | 82 | 113 | 75 |
| SMMPA02106 | 16 | 18 | 18 | 28  | 28  | 13  | 25 | 42  | 42 |
| SMMPA02107 | 9  | 8  | 8  | 14  | 14  | 7   | 7  | 18  | 14 |
| SMMPA02108 | 11 | 20 | 12 | 33  | 21  | 33  | 25 | 29  | 27 |
| SMMPA02109 | 20 | 16 | 14 | 21  | 20  | 21  | 17 | 19  | 24 |
| SMMPA02110 | 23 | 20 | 18 | 85  | 80  | 45  | 37 | 47  | 45 |
| SMMPA02111 | 21 | 16 | 14 | 36  | 28  | 36  | 19 | 23  | 27 |
| SMMPA02112 | 41 | 28 | 24 | 91  | 87  | 63  | 52 | 40  | 45 |
| SMMPA02113 | 18 | 24 | 22 | 59  | 64  | 53  | 27 | 55  | 48 |
| SMMPA02114 | 19 | 13 | 16 | 113 | 133 | 70  | 37 | 46  | 57 |
| SMMPA02115 | 8  | 16 | 12 | 23  | 23  | 17  | 17 | 31  | 23 |
| SMMPA02116 | 12 | 16 | 6  | 9   | 14  | 18  | 9  | 13  | 15 |
| SMMPA02117 | 18 | 16 | 28 | 50  | 28  | 40  | 17 | 21  | 35 |
| SMMPA02118 | 20 | 12 | 10 | 8   | 15  | 14  | 13 | 22  | 27 |
| SMMPA02119 | 12 | 10 | 10 | 49  | 47  | 55  | 29 | 31  | 29 |
| SMMPA02120 | 17 | 15 | 10 | 35  | 28  | 24  | 17 | 19  | 20 |
| SMMPA02121 | 18 | 19 | 22 | 92  | 80  | 72  | 32 | 57  | 52 |
| SMMPA02122 | 12 | 15 | 14 | 18  | 27  | 23  | 22 | 17  | 11 |
| SMMPA02123 | 18 | 32 | 28 | 58  | 67  | 48  | 40 | 60  | 45 |
| SMMPA02124 | 17 | 20 | 20 | 32  | 31  | 28  | 27 | 38  | 23 |
| SMMPA02125 | 18 | 20 | 18 | 147 | 141 | 101 | 34 | 49  | 38 |
| SMMPA02126 | 11 | 13 | 16 | 36  | 33  | 32  | 29 | 30  | 27 |
| SMMPA02127 | 11 | 11 | 11 | 23  | 23  | 22  | 21 | 31  | 16 |
| SMMPA02128 | 26 | 23 | 30 | 67  | 64  | 35  | 39 | 52  | 44 |
| SMMPA02129 | 18 | 23 | 16 | 23  | 23  | 27  | 24 | 30  | 22 |
| SMMPA02130 | 13 | 15 | 10 | 10  | 18  | 16  | 24 | 15  | 17 |
| SMMPA02131 | 11 | 10 | 10 | 12  | 5   | 17  | 18 | 16  | 13 |
| SMMPA02132 | 17 | 13 | 16 | 12  | 11  | 11  | 16 | 20  | 20 |
| SMMPA02133 | 17 | 7  | 9  | 16  | 9   | 5   | 12 | 14  | 26 |
| SMMPA02134 | 22 | 20 | 29 | 39  | 50  | 33  | 31 | 30  | 44 |
| SMMPA02135 | 35 | 27 | 35 | 93  | 99  | 66  | 50 | 73  | 72 |

|            |    |    |    |     |     |     |    |     |    |
|------------|----|----|----|-----|-----|-----|----|-----|----|
| SMMPA02136 | 19 | 20 | 21 | 16  | 14  | 13  | 10 | 13  | 14 |
| SMMPA02137 | 11 | 10 | 14 | 20  | 14  | 15  | 20 | 22  | 23 |
| SMMPA02138 | 12 | 16 | 17 | 37  | 42  | 31  | 41 | 47  | 50 |
| SMMPA02139 | 11 | 15 | 5  | 7   | 15  | 11  | 17 | 26  | 18 |
| SMMPA02140 | 21 | 31 | 23 | 21  | 31  | 38  | 35 | 35  | 35 |
| SMMPA02141 | 8  | 5  | 5  | 7   | 8   | 9   | 8  | 12  | 5  |
| SMMPA02142 | 11 | 12 | 8  | 13  | 14  | 12  | 9  | 12  | 14 |
| SMMPA02143 | 19 | 13 | 10 | 6   | 6   | 8   | 14 | 21  | 14 |
| SMMPA02144 | 19 | 15 | 13 | 18  | 25  | 14  | 18 | 27  | 20 |
| SMMPA02145 | 24 | 25 | 12 | 37  | 21  | 15  | 37 | 36  | 27 |
| SMMPA02146 | 6  | 6  | 4  | 9   | 11  | 6   | 9  | 14  | 14 |
| SMMPA02147 | 8  | 19 | 8  | 22  | 18  | 16  | 25 | 27  | 31 |
| SMMPA02148 | 20 | 17 | 16 | 19  | 25  | 13  | 14 | 23  | 26 |
| SMMPA02149 | 14 | 36 | 17 | 27  | 26  | 22  | 26 | 29  | 27 |
| SMMPA02150 | 5  | 8  | 6  | 14  | 10  | 10  | 21 | 23  | 15 |
| SMMPA02151 | 17 | 17 | 19 | 24  | 35  | 27  | 24 | 30  | 37 |
| SMMPA02152 | 12 | 19 | 17 | 35  | 23  | 17  | 24 | 39  | 48 |
| SMMPA02153 | 29 | 23 | 23 | 66  | 58  | 41  | 65 | 80  | 67 |
| SMMPA02154 | 16 | 24 | 15 | 24  | 11  | 17  | 13 | 17  | 28 |
| SMMPA02155 | 6  | 14 | 13 | 13  | 14  | 14  | 8  | 11  | 11 |
| SMMPA02156 | 20 | 26 | 23 | 36  | 40  | 28  | 31 | 44  | 35 |
| SMMPA02157 | 14 | 17 | 15 | 25  | 29  | 32  | 41 | 27  | 22 |
| SMMPA02158 | 12 | 11 | 6  | 14  | 13  | 6   | 16 | 18  | 12 |
| SMMPA02159 | 25 | 36 | 31 | 42  | 41  | 46  | 38 | 47  | 47 |
| SMMPA02160 | 45 | 35 | 42 | 117 | 127 | 93  | 66 | 104 | 98 |
| SMMPA02161 | 35 | 40 | 41 | 59  | 62  | 68  | 47 | 44  | 48 |
| SMMPA02162 | 13 | 24 | 21 | 83  | 75  | 49  | 42 | 57  | 43 |
| SMMPA02163 | 24 | 27 | 23 | 82  | 61  | 46  | 31 | 53  | 40 |
| SMMPA02164 | 22 | 13 | 21 | 67  | 63  | 48  | 40 | 42  | 33 |
| SMMPA02165 | 29 | 31 | 25 | 146 | 148 | 109 | 52 | 75  | 79 |
| SMMPA02166 | 56 | 60 | 48 | 28  | 52  | 41  | 55 | 63  | 70 |
| SMMPA02167 | 12 | 19 | 18 | 58  | 46  | 43  | 24 | 57  | 48 |
| SMMPA02168 | 5  | 8  | 8  | 14  | 32  | 17  | 13 | 16  | 15 |
| SMMPA02169 | 6  | 3  | 4  | 24  | 32  | 27  | 12 | 21  | 18 |
| SMMPA02170 | 10 | 8  | 6  | 4   | 24  | 12  | 9  | 11  | 11 |
| SMMPA02171 | 15 | 15 | 9  | 17  | 22  | 12  | 15 | 15  | 15 |
| SMMPA02172 | 22 | 8  | 11 | 14  | 29  | 30  | 21 | 24  | 34 |
| SMMPA02173 | 38 | 29 | 30 | 122 | 102 | 94  | 44 | 55  | 41 |
| SMMPA02174 | 12 | 17 | 11 | 22  | 18  | 18  | 9  | 20  | 15 |
| SMMPA02175 | 4  | 3  | 3  | 27  | 20  | 7   | 9  | 20  | 13 |
| SMMPA02176 | 19 | 13 | 16 | 49  | 60  | 31  | 33 | 36  | 33 |

|            |    |    |    |     |     |     |     |     |     |
|------------|----|----|----|-----|-----|-----|-----|-----|-----|
| SMMPA02177 | 19 | 32 | 17 | 54  | 70  | 42  | 29  | 26  | 34  |
| SMMPA02178 | 11 | 14 | 6  | 20  | 13  | 23  | 9   | 17  | 18  |
| SMMPA02179 | 4  | 7  | 2  | 20  | 17  | 20  | 21  | 20  | 14  |
| SMMPA02180 | 4  | 4  | 3  | 12  | 8   | 3   | 6   | 3   | 6   |
| SMMPA02181 | 10 | 10 | 7  | 25  | 34  | 30  | 11  | 20  | 18  |
| SMMPA02182 | 45 | 62 | 38 | 356 | 354 | 272 | 137 | 191 | 179 |
| SMMPA02183 | 19 | 22 | 14 | 43  | 36  | 25  | 20  | 29  | 20  |
| SMMPA02184 | 7  | 2  | 2  | 16  | 12  | 13  | 7   | 15  | 10  |
| SMMPA02185 | 5  | 8  | 7  | 16  | 22  | 16  | 15  | 10  | 14  |
| SMMPA02186 | 11 | 19 | 16 | 52  | 34  | 34  | 32  | 34  | 27  |
| SMMPA02187 | 3  | 12 | 9  | 9   | 7   | 13  | 11  | 14  | 13  |
| SMMPA02188 | 10 | 15 | 20 | 240 | 279 | 267 | 80  | 106 | 90  |
| SMMPA02189 | 16 | 23 | 19 | 96  | 105 | 91  | 20  | 33  | 34  |
| SMMPA02190 | 24 | 28 | 21 | 27  | 33  | 15  | 26  | 38  | 29  |
| SMMPA02191 | 21 | 26 | 18 | 54  | 45  | 29  | 48  | 64  | 67  |
| SMMPA02192 | 21 | 29 | 33 | 58  | 45  | 31  | 35  | 36  | 41  |
| SMMPA02193 | 31 | 30 | 17 | 29  | 37  | 31  | 33  | 44  | 40  |
| SMMPA02194 | 10 | 19 | 16 | 33  | 28  | 31  | 23  | 35  | 32  |
| SMMPA02195 | 8  | 4  | 11 | 15  | 10  | 14  | 9   | 14  | 13  |
| SMMPA02196 | 7  | 10 | 5  | 11  | 15  | 13  | 13  | 6   | 10  |
| SMMPA02197 | 30 | 24 | 30 | 33  | 29  | 31  | 16  | 27  | 24  |
| SMMPA02198 | 17 | 11 | 16 | 46  | 39  | 25  | 24  | 48  | 37  |
| SMMPA02199 | 31 | 21 | 30 | 31  | 33  | 33  | 47  | 37  | 46  |
| SMMPA02200 | 7  | 8  | 4  | 15  | 12  | 10  | 5   | 6   | 7   |
| SMMPA02201 | 22 | 25 | 24 | 167 | 147 | 93  | 77  | 95  | 82  |
| SMMPA02202 | 11 | 17 | 8  | 190 | 167 | 120 | 95  | 111 | 95  |
| SMMPA02203 | 22 | 12 | 26 | 145 | 153 | 116 | 69  | 109 | 84  |
| SMMPA02204 | 15 | 16 | 9  | 36  | 14  | 32  | 24  | 30  | 40  |
| SMMPA02205 | 20 | 30 | 20 | 223 | 159 | 156 | 93  | 112 | 120 |
| SMMPA02206 | 13 | 24 | 19 | 165 | 172 | 111 | 71  | 110 | 111 |
| SMMPA02207 | 18 | 21 | 14 | 43  | 25  | 35  | 34  | 33  | 31  |
| SMMPA02208 | 20 | 23 | 22 | 37  | 34  | 27  | 29  | 35  | 41  |
| SMMPA02209 | 11 | 16 | 15 | 18  | 12  | 12  | 20  | 31  | 43  |
| SMMPA02210 | 6  | 7  | 8  | 10  | 8   | 11  | 9   | 10  | 8   |
| SMMPA02211 | 18 | 14 | 24 | 47  | 48  | 39  | 42  | 39  | 24  |
| SMMPA02212 | 16 | 7  | 8  | 21  | 14  | 11  | 8   | 15  | 15  |
| SMMPA02213 | 17 | 9  | 22 | 24  | 29  | 20  | 22  | 21  | 23  |
| SMMPA02214 | 26 | 48 | 18 | 282 | 233 | 180 | 133 | 158 | 147 |
| SMMPA02215 | 26 | 22 | 16 | 24  | 18  | 27  | 16  | 22  | 22  |
| SMMPA02216 | 12 | 19 | 13 | 107 | 95  | 81  | 35  | 70  | 55  |
| SMMPA02217 | 20 | 27 | 19 | 45  | 39  | 31  | 37  | 29  | 40  |

|            |    |    |    |     |     |     |     |     |     |
|------------|----|----|----|-----|-----|-----|-----|-----|-----|
| SMMPA02218 | 20 | 14 | 16 | 34  | 30  | 24  | 25  | 27  | 23  |
| SMMPA02219 | 12 | 24 | 21 | 18  | 15  | 17  | 13  | 25  | 14  |
| SMMPA02220 | 28 | 22 | 26 | 33  | 29  | 30  | 30  | 40  | 40  |
| SMMPA02221 | 20 | 37 | 18 | 30  | 33  | 26  | 33  | 35  | 42  |
| SMMPA02222 | 10 | 22 | 13 | 34  | 36  | 34  | 23  | 39  | 48  |
| SMMPA02223 | 13 | 14 | 19 | 14  | 10  | 18  | 15  | 21  | 20  |
| SMMPA02224 | 15 | 16 | 10 | 17  | 28  | 20  | 19  | 23  | 24  |
| SMMPA02225 | 27 | 22 | 34 | 28  | 26  | 28  | 26  | 38  | 29  |
| SMMPA02226 | 30 | 36 | 23 | 64  | 61  | 45  | 63  | 61  | 68  |
| SMMPA02227 | 15 | 12 | 12 | 30  | 27  | 22  | 21  | 18  | 23  |
| SMMPA02228 | 7  | 9  | 9  | 15  | 15  | 10  | 9   | 21  | 15  |
| SMMPA02229 | 12 | 14 | 9  | 63  | 42  | 52  | 34  | 42  | 33  |
| SMMPA02230 | 9  | 8  | 7  | 19  | 18  | 14  | 1   | 15  | 11  |
| SMMPA02231 | 9  | 12 | 8  | 18  | 19  | 16  | 10  | 22  | 9   |
| SMMPA02232 | 7  | 4  | 3  | 33  | 28  | 16  | 11  | 22  | 20  |
| SMMPA02233 | 18 | 31 | 28 | 88  | 75  | 69  | 32  | 38  | 47  |
| SMMPA02234 | 11 | 8  | 6  | 8   | 16  | 13  | 10  | 14  | 8   |
| SMMPA02235 | 28 | 16 | 17 | 132 | 122 | 101 | 74  | 81  | 74  |
| SMMPA02236 | 13 | 24 | 22 | 321 | 273 | 238 | 172 | 206 | 216 |
| SMMPA02237 | 17 | 21 | 13 | 196 | 166 | 134 | 112 | 137 | 124 |
| SMMPA02238 | 17 | 24 | 18 | 35  | 39  | 31  | 33  | 32  | 50  |
| SMMPA02239 | 25 | 24 | 23 | 68  | 52  | 52  | 42  | 70  | 64  |
| SMMPA02240 | 47 | 44 | 29 | 175 | 154 | 138 | 102 | 147 | 137 |
| SMMPA02241 | 5  | 2  | 7  | 4   | 3   | 5   | 3   | 4   | 2   |
| SMMPA02242 | 6  | 10 | 6  | 19  | 18  | 9   | 13  | 12  | 23  |
| SMMPA02243 | 12 | 12 | 8  | 10  | 18  | 16  | 11  | 23  | 26  |
| SMMPA02244 | 14 | 6  | 14 | 28  | 17  | 18  | 23  | 25  | 23  |
| SMMPA02245 | 27 | 25 | 24 | 362 | 354 | 295 | 141 | 235 | 150 |
| SMMPA02246 | 20 | 46 | 29 | 143 | 133 | 91  | 86  | 106 | 101 |
| SMMPA02247 | 21 | 21 | 19 | 50  | 54  | 26  | 30  | 29  | 31  |
| SMMPA02248 | 18 | 20 | 22 | 44  | 54  | 42  | 34  | 53  | 48  |
| SMMPA02249 | 11 | 16 | 26 | 40  | 34  | 38  | 23  | 34  | 29  |
| SMMPA02250 | 10 | 20 | 21 | 122 | 126 | 115 | 63  | 74  | 75  |
| SMMPA02251 | 25 | 30 | 34 | 123 | 111 | 82  | 55  | 87  | 85  |
| SMMPA02252 | 13 | 4  | 12 | 29  | 35  | 28  | 22  | 21  | 22  |
| SMMPA02253 | 42 | 38 | 33 | 63  | 38  | 40  | 45  | 52  | 53  |
| SMMPA02254 | 57 | 48 | 34 | 171 | 173 | 134 | 101 | 160 | 140 |
| SMMPA02255 | 16 | 22 | 30 | 117 | 121 | 103 | 60  | 59  | 54  |
| SMMPA02256 | 24 | 26 | 30 | 69  | 88  | 57  | 61  | 76  | 80  |
| SMMPA02257 | 10 | 17 | 8  | 8   | 12  | 6   | 7   | 18  | 10  |
| SMMPA02258 | 1  | 3  | 3  | 0   | 1   | 1   | 0   | 3   | 0   |



|            |    |    |    |     |     |     |     |     |     |
|------------|----|----|----|-----|-----|-----|-----|-----|-----|
| SMMPA02259 | 8  | 13 | 7  | 32  | 33  | 35  | 22  | 23  | 20  |
| SMMPA02260 | 22 | 26 | 22 | 73  | 62  | 62  | 29  | 27  | 21  |
| SMMPA02261 | 19 | 14 | 9  | 46  | 45  | 36  | 22  | 19  | 18  |
| SMMPA02262 | 20 | 14 | 24 | 16  | 12  | 17  | 12  | 21  | 23  |
| SMMPA02263 | 14 | 18 | 28 | 39  | 35  | 25  | 32  | 22  | 38  |
| SMMPA02264 | 35 | 21 | 18 | 30  | 29  | 26  | 36  | 41  | 40  |
| SMMPA02265 | 25 | 18 | 16 | 33  | 51  | 33  | 37  | 43  | 50  |
| SMMPA02266 | 8  | 20 | 15 | 48  | 20  | 39  | 15  | 20  | 27  |
| SMMPA02267 | 26 | 28 | 23 | 28  | 24  | 23  | 21  | 38  | 35  |
| SMMPA02268 | 8  | 12 | 6  | 18  | 7   | 13  | 5   | 16  | 18  |
| SMMPA02269 | 7  | 11 | 10 | 26  | 16  | 25  | 15  | 31  | 21  |
| SMMPA02270 | 15 | 8  | 18 | 26  | 24  | 21  | 10  | 17  | 24  |
| SMMPA02271 | 9  | 7  | 9  | 22  | 22  | 26  | 12  | 19  | 18  |
| SMMPA02272 | 9  | 5  | 5  | 14  | 7   | 3   | 2   | 4   | 9   |
| SMMPA02273 | 17 | 19 | 20 | 45  | 46  | 37  | 32  | 39  | 34  |
| SMMPA02274 | 14 | 12 | 17 | 92  | 88  | 82  | 45  | 74  | 52  |
| SMMPA02275 | 6  | 11 | 8  | 27  | 27  | 15  | 14  | 18  | 12  |
| SMMPA02276 | 8  | 11 | 11 | 33  | 34  | 17  | 17  | 28  | 21  |
| SMMPA02277 | 18 | 21 | 15 | 29  | 28  | 16  | 21  | 26  | 25  |
| SMMPA02278 | 23 | 27 | 32 | 73  | 58  | 50  | 30  | 40  | 39  |
| SMMPA02279 | 15 | 15 | 7  | 669 | 635 | 587 | 383 | 426 | 402 |
| SMMPA02280 | 44 | 34 | 56 | 575 | 498 | 454 | 315 | 398 | 365 |
| SMMPA02281 | 12 | 20 | 9  | 280 | 322 | 261 | 169 | 237 | 211 |
| SMMPA02282 | 2  | 13 | 6  | 150 | 155 | 143 | 103 | 161 | 142 |
| SMMPA02283 | 16 | 11 | 16 | 148 | 152 | 116 | 62  | 112 | 99  |
| SMMPA02284 | 22 | 22 | 17 | 78  | 73  | 58  | 38  | 51  | 44  |
| SMMPA02285 | 28 | 29 | 45 | 498 | 476 | 387 | 171 | 214 | 223 |
| SMMPA02286 | 39 | 39 | 34 | 45  | 46  | 54  | 38  | 46  | 59  |
| SMMPA02287 | 30 | 33 | 18 | 33  | 46  | 33  | 35  | 40  | 58  |
| SMMPA02288 | 29 | 32 | 21 | 32  | 41  | 36  | 39  | 33  | 27  |
| SMMPA02289 | 10 | 5  | 15 | 15  | 22  | 11  | 14  | 17  | 13  |
| SMMPA02290 | 10 | 9  | 5  | 22  | 23  | 23  | 21  | 21  | 18  |
| SMMPA02291 | 47 | 36 | 39 | 64  | 60  | 64  | 47  | 56  | 60  |
| SMMPA02292 | 17 | 19 | 20 | 31  | 20  | 25  | 27  | 27  | 19  |
| SMMPA02293 | 24 | 32 | 27 | 42  | 29  | 20  | 32  | 32  | 43  |
| SMMPA02294 | 12 | 18 | 14 | 34  | 26  | 27  | 21  | 24  | 18  |
| SMMPA02295 | 41 | 36 | 37 | 128 | 108 | 95  | 65  | 61  | 76  |
| SMMPA02296 | 54 | 62 | 70 | 52  | 61  | 46  | 36  | 57  | 50  |
| SMMPA02297 | 62 | 53 | 55 | 75  | 87  | 75  | 55  | 75  | 65  |
| SMMPA02298 | 16 | 8  | 9  | 25  | 14  | 22  | 17  | 26  | 24  |
| SMMPA02299 | 22 | 23 | 19 | 35  | 33  | 30  | 20  | 31  | 33  |

|            |     |     |     |     |     |     |     |     |     |
|------------|-----|-----|-----|-----|-----|-----|-----|-----|-----|
| SMMPA02300 | 29  | 23  | 21  | 59  | 69  | 48  | 20  | 26  | 32  |
| SMMPA02301 | 25  | 16  | 14  | 32  | 27  | 24  | 14  | 26  | 33  |
| SMMPA02302 | 12  | 8   | 17  | 98  | 92  | 74  | 28  | 36  | 29  |
| SMMPA02303 | 13  | 18  | 16  | 64  | 49  | 49  | 37  | 40  | 37  |
| SMMPA02304 | 23  | 21  | 22  | 268 | 237 | 154 | 93  | 127 | 98  |
| SMMPA02305 | 21  | 25  | 31  | 87  | 97  | 63  | 64  | 87  | 90  |
| SMMPA02306 | 24  | 19  | 21  | 210 | 183 | 155 | 84  | 113 | 111 |
| SMMPA02307 | 19  | 20  | 16  | 121 | 128 | 90  | 70  | 69  | 65  |
| SMMPA02308 | 8   | 11  | 8   | 74  | 92  | 71  | 34  | 47  | 41  |
| SMMPA02309 | 8   | 12  | 9   | 75  | 67  | 61  | 32  | 46  | 50  |
| SMMPA02310 | 26  | 24  | 18  | 232 | 216 | 161 | 119 | 135 | 111 |
| SMMPA02311 | 17  | 12  | 21  | 100 | 113 | 89  | 65  | 64  | 61  |
| SMMPA02312 | 16  | 13  | 8   | 52  | 47  | 34  | 21  | 31  | 44  |
| SMMPA02313 | 13  | 21  | 18  | 61  | 55  | 38  | 51  | 45  | 42  |
| SMMPA02314 | 23  | 24  | 19  | 78  | 71  | 57  | 26  | 37  | 36  |
| SMMPA02315 | 23  | 25  | 16  | 300 | 285 | 238 | 130 | 151 | 143 |
| SMMPA02316 | 9   | 11  | 11  | 32  | 34  | 25  | 17  | 25  | 24  |
| SMMPA02317 | 10  | 3   | 6   | 6   | 7   | 7   | 12  | 22  | 25  |
| SMMPA02318 | 21  | 29  | 24  | 52  | 49  | 48  | 40  | 52  | 37  |
| SMMPA02319 | 12  | 11  | 9   | 17  | 20  | 22  | 21  | 31  | 29  |
| SMMPA02320 | 24  | 19  | 18  | 47  | 57  | 39  | 47  | 54  | 53  |
| SMMPA02321 | 39  | 34  | 32  | 107 | 101 | 81  | 61  | 93  | 74  |
| SMMPA02322 | 34  | 39  | 33  | 366 | 326 | 264 | 143 | 215 | 194 |
| SMMPA02323 | 27  | 25  | 23  | 77  | 69  | 60  | 45  | 57  | 63  |
| SMMPA02324 | 36  | 27  | 25  | 239 | 224 | 167 | 87  | 129 | 108 |
| SMMPA02325 | 12  | 14  | 7   | 56  | 58  | 60  | 17  | 35  | 26  |
| SMMPA02326 | 14  | 24  | 32  | 95  | 71  | 53  | 48  | 51  | 49  |
| SMMPA02327 | 13  | 18  | 15  | 37  | 33  | 39  | 20  | 38  | 34  |
| SMMPA02328 | 26  | 24  | 24  | 103 | 81  | 98  | 79  | 88  | 91  |
| SMMPA02329 | 39  | 52  | 28  | 114 | 92  | 82  | 55  | 65  | 69  |
| SMMPA02330 | 24  | 12  | 9   | 33  | 34  | 21  | 10  | 34  | 20  |
| SMMPA02331 | 25  | 27  | 23  | 85  | 60  | 53  | 41  | 45  | 43  |
| SMMPA02332 | 122 | 132 | 126 | 242 | 215 | 203 | 98  | 161 | 142 |
| SMMPA02333 | 10  | 19  | 17  | 39  | 31  | 21  | 25  | 35  | 26  |
| SMMPA02334 | 39  | 49  | 40  | 92  | 80  | 79  | 52  | 72  | 85  |
| SMMPA02335 | 13  | 18  | 16  | 44  | 41  | 25  | 27  | 42  | 37  |
| SMMPA02336 | 18  | 17  | 17  | 30  | 33  | 20  | 14  | 19  | 24  |
| SMMPA02337 | 18  | 13  | 22  | 49  | 63  | 48  | 30  | 37  | 29  |
| SMMPA02338 | 10  | 18  | 12  | 32  | 31  | 24  | 26  | 25  | 27  |
| SMMPA02339 | 6   | 9   | 7   | 19  | 24  | 27  | 9   | 15  | 16  |
| SMMPA02340 | 17  | 19  | 22  | 25  | 27  | 27  | 33  | 33  | 25  |

|            |    |    |    |     |     |     |     |     |     |
|------------|----|----|----|-----|-----|-----|-----|-----|-----|
| SMMPA02341 | 25 | 14 | 18 | 68  | 58  | 43  | 30  | 44  | 32  |
| SMMPA02342 | 2  | 0  | 2  | 12  | 15  | 15  | 8   | 9   | 8   |
| SMMPA02343 | 14 | 13 | 14 | 205 | 160 | 130 | 67  | 107 | 95  |
| SMMPA02344 | 27 | 15 | 20 | 18  | 20  | 16  | 21  | 27  | 32  |
| SMMPA02345 | 22 | 21 | 17 | 19  | 21  | 19  | 19  | 31  | 34  |
| SMMPA02346 | 9  | 11 | 12 | 32  | 14  | 17  | 18  | 16  | 20  |
| SMMPA02347 | 25 | 16 | 14 | 21  | 10  | 15  | 19  | 24  | 37  |
| SMMPA02348 | 19 | 27 | 16 | 58  | 47  | 29  | 34  | 38  | 37  |
| SMMPA02349 | 29 | 16 | 21 | 23  | 21  | 20  | 28  | 28  | 28  |
| SMMPA02350 | 30 | 27 | 22 | 23  | 38  | 30  | 15  | 23  | 33  |
| SMMPA02351 | 5  | 20 | 11 | 60  | 74  | 63  | 29  | 38  | 43  |
| SMMPA02352 | 12 | 24 | 14 | 48  | 52  | 34  | 27  | 51  | 47  |
| SMMPA02353 | 29 | 35 | 30 | 174 | 153 | 139 | 58  | 95  | 81  |
| SMMPA02354 | 10 | 6  | 5  | 51  | 38  | 53  | 20  | 26  | 32  |
| SMMPA02355 | 32 | 27 | 21 | 149 | 172 | 103 | 59  | 81  | 93  |
| SMMPA02356 | 24 | 23 | 23 | 108 | 106 | 103 | 69  | 98  | 78  |
| SMMPA02357 | 17 | 22 | 26 | 80  | 72  | 45  | 41  | 56  | 47  |
| SMMPA02358 | 29 | 31 | 17 | 256 | 236 | 185 | 107 | 157 | 116 |
| SMMPA02359 | 18 | 14 | 18 | 189 | 221 | 169 | 84  | 86  | 71  |
| SMMPA02360 | 44 | 35 | 31 | 355 | 323 | 243 | 193 | 254 | 215 |
| SMMPA02361 | 27 | 27 | 27 | 116 | 135 | 96  | 48  | 80  | 61  |
| SMMPA02362 | 28 | 30 | 35 | 104 | 80  | 65  | 69  | 80  | 80  |
| SMMPA02363 | 13 | 15 | 15 | 35  | 17  | 29  | 27  | 30  | 30  |
| SMMPA02364 | 16 | 19 | 21 | 59  | 57  | 53  | 41  | 72  | 55  |
| SMMPA02365 | 13 | 10 | 14 | 82  | 67  | 67  | 39  | 55  | 43  |
| SMMPA02366 | 14 | 12 | 14 | 87  | 93  | 53  | 48  | 79  | 69  |
| SMMPA02367 | 4  | 2  | 5  | 18  | 14  | 9   | 19  | 16  | 25  |
| SMMPA02368 | 29 | 28 | 28 | 114 | 100 | 77  | 72  | 90  | 86  |
| SMMPA02369 | 17 | 14 | 19 | 123 | 82  | 70  | 66  | 98  | 76  |
| SMMPA02370 | 19 | 27 | 17 | 236 | 178 | 131 | 104 | 167 | 126 |
| SMMPA02371 | 22 | 41 | 26 | 97  | 98  | 90  | 74  | 101 | 97  |
| SMMPA02372 | 10 | 19 | 14 | 102 | 92  | 60  | 70  | 96  | 73  |
| SMMPA02373 | 17 | 21 | 28 | 109 | 87  | 72  | 58  | 60  | 48  |
| SMMPA02374 | 8  | 11 | 7  | 22  | 21  | 18  | 15  | 24  | 20  |
| SMMPA02375 | 9  | 12 | 13 | 7   | 14  | 21  | 8   | 15  | 5   |
| SMMPA02376 | 2  | 7  | 6  | 24  | 31  | 21  | 24  | 32  | 26  |
| SMMPA02377 | 15 | 22 | 14 | 32  | 25  | 26  | 38  | 45  | 38  |
| SMMPA02378 | 32 | 27 | 25 | 129 | 125 | 84  | 83  | 99  | 103 |
| SMMPA02379 | 29 | 25 | 20 | 48  | 37  | 38  | 33  | 50  | 51  |
| SMMPA02380 | 38 | 33 | 31 | 37  | 24  | 21  | 38  | 51  | 65  |
| SMMPA02381 | 19 | 17 | 25 | 167 | 141 | 130 | 86  | 111 | 114 |

|            |    |    |    |     |     |     |     |     |     |
|------------|----|----|----|-----|-----|-----|-----|-----|-----|
| SMMPA02382 | 30 | 32 | 25 | 46  | 51  | 46  | 44  | 53  | 54  |
| SMMPA02383 | 25 | 31 | 16 | 38  | 36  | 34  | 38  | 44  | 43  |
| SMMPA02384 | 24 | 22 | 19 | 66  | 41  | 37  | 41  | 51  | 46  |
| SMMPA02385 | 38 | 32 | 38 | 108 | 96  | 92  | 61  | 77  | 67  |
| SMMPA02386 | 36 | 23 | 28 | 92  | 81  | 57  | 55  | 90  | 58  |
| SMMPA02387 | 28 | 37 | 32 | 101 | 69  | 72  | 44  | 51  | 57  |
| SMMPA02388 | 12 | 8  | 6  | 19  | 19  | 25  | 18  | 16  | 23  |
| SMMPA02389 | 17 | 23 | 20 | 50  | 53  | 49  | 39  | 40  | 48  |
| SMMPA02390 | 18 | 20 | 16 | 51  | 31  | 34  | 17  | 45  | 40  |
| SMMPA02391 | 10 | 18 | 14 | 59  | 62  | 38  | 33  | 46  | 47  |
| SMMPA02392 | 10 | 19 | 22 | 39  | 29  | 22  | 19  | 29  | 23  |
| SMMPA02393 | 29 | 28 | 22 | 46  | 44  | 47  | 38  | 39  | 59  |
| SMMPA02394 | 11 | 12 | 12 | 22  | 20  | 18  | 24  | 28  | 17  |
| SMMPA02395 | 21 | 21 | 20 | 32  | 36  | 34  | 30  | 46  | 30  |
| SMMPA02396 | 17 | 9  | 11 | 54  | 34  | 39  | 21  | 31  | 43  |
| SMMPA02397 | 26 | 23 | 27 | 41  | 40  | 32  | 31  | 38  | 44  |
| SMMPA02398 | 21 | 26 | 22 | 29  | 25  | 18  | 35  | 42  | 47  |
| SMMPA02399 | 32 | 41 | 38 | 55  | 49  | 37  | 46  | 59  | 43  |
| SMMPA02400 | 13 | 19 | 12 | 10  | 14  | 24  | 22  | 36  | 26  |
| SMMPA02401 | 16 | 23 | 17 | 75  | 73  | 48  | 42  | 58  | 59  |
| SMMPA02402 | 38 | 23 | 22 | 63  | 58  | 49  | 33  | 54  | 39  |
| SMMPA02403 | 14 | 16 | 12 | 724 | 780 | 725 | 509 | 567 | 577 |
| SMMPA02404 | 9  | 17 | 13 | 323 | 321 | 277 | 143 | 217 | 167 |
| SMMPA02405 | 20 | 19 | 20 | 28  | 32  | 36  | 29  | 33  | 33  |
| SMMPA02406 | 14 | 17 | 8  | 25  | 13  | 18  | 23  | 18  | 16  |
| SMMPA02407 | 50 | 41 | 30 | 109 | 98  | 64  | 48  | 47  | 79  |
| SMMPA02408 | 18 | 15 | 14 | 15  | 25  | 14  | 20  | 25  | 27  |
| SMMPA02409 | 27 | 25 | 19 | 42  | 35  | 24  | 31  | 38  | 43  |
| SMMPA02410 | 25 | 22 | 14 | 26  | 26  | 23  | 26  | 45  | 46  |
| SMMPA02411 | 32 | 35 | 24 | 61  | 63  | 47  | 50  | 53  | 51  |
| SMMPA02412 | 16 | 16 | 13 | 17  | 12  | 18  | 23  | 19  | 22  |
| SMMPA02413 | 23 | 22 | 23 | 36  | 31  | 33  | 13  | 28  | 29  |
| SMMPA02414 | 73 | 79 | 75 | 66  | 55  | 53  | 54  | 56  | 65  |
| SMMPA02415 | 51 | 57 | 36 | 154 | 102 | 100 | 73  | 82  | 59  |
| SMMPA02416 | 25 | 25 | 25 | 28  | 41  | 31  | 28  | 42  | 31  |
| SMMPA02417 | 34 | 34 | 41 | 103 | 95  | 77  | 106 | 162 | 128 |
| SMMPA02418 | 32 | 19 | 30 | 80  | 60  | 58  | 56  | 56  | 43  |
| SMMPA02419 | 37 | 29 | 37 | 54  | 63  | 59  | 44  | 67  | 54  |
| SMMPA02420 | 15 | 8  | 19 | 37  | 31  | 21  | 19  | 26  | 25  |
| SMMPA02421 | 21 | 20 | 18 | 45  | 33  | 35  | 32  | 42  | 35  |
| SMMPA02422 | 21 | 16 | 21 | 36  | 44  | 31  | 27  | 52  | 31  |

|            |    |    |    |     |     |     |     |     |     |
|------------|----|----|----|-----|-----|-----|-----|-----|-----|
| SMMPA02423 | 17 | 30 | 20 | 81  | 91  | 79  | 41  | 55  | 43  |
| SMMPA02424 | 25 | 24 | 16 | 29  | 25  | 27  | 30  | 42  | 43  |
| SMMPA02425 | 32 | 24 | 18 | 156 | 128 | 94  | 88  | 114 | 94  |
| SMMPA02426 | 19 | 14 | 15 | 78  | 65  | 50  | 62  | 78  | 63  |
| SMMPA02427 | 18 | 22 | 20 | 81  | 69  | 70  | 64  | 62  | 62  |
| SMMPA02428 | 12 | 3  | 12 | 15  | 16  | 12  | 17  | 30  | 26  |
| SMMPA02429 | 14 | 14 | 12 | 30  | 25  | 16  | 19  | 12  | 28  |
| SMMPA02430 | 4  | 2  | 6  | 2   | 1   | 2   | 7   | 0   | 1   |
| SMMPA02431 | 15 | 13 | 12 | 25  | 19  | 20  | 16  | 24  | 29  |
| SMMPA02432 | 20 | 18 | 17 | 33  | 23  | 11  | 20  | 26  | 26  |
| SMMPA02433 | 12 | 3  | 5  | 11  | 6   | 6   | 9   | 15  | 16  |
| SMMPA02434 | 18 | 18 | 20 | 28  | 28  | 33  | 17  | 23  | 27  |
| SMMPA02435 | 7  | 6  | 4  | 2   | 3   | 3   | 1   | 3   | 6   |
| SMMPA02436 | 16 | 12 | 9  | 5   | 3   | 5   | 8   | 7   | 6   |
| SMMPA02437 | 21 | 13 | 21 | 607 | 556 | 529 | 207 | 284 | 275 |
| SMMPA02438 | 3  | 9  | 8  | 169 | 162 | 134 | 94  | 133 | 116 |
| SMMPA02439 | 10 | 9  | 4  | 223 | 207 | 164 | 78  | 103 | 87  |
| SMMPA02440 | 14 | 20 | 17 | 62  | 71  | 36  | 46  | 41  | 45  |
| SMMPA02441 | 25 | 16 | 18 | 162 | 151 | 111 | 84  | 98  | 95  |
| SMMPA02442 | 27 | 26 | 23 | 50  | 38  | 36  | 29  | 34  | 36  |
| SMMPA02443 | 23 | 20 | 22 | 134 | 110 | 100 | 54  | 81  | 68  |
| SMMPA02444 | 9  | 15 | 13 | 9   | 4   | 12  | 14  | 23  | 23  |
| SMMPA02445 | 6  | 10 | 9  | 5   | 2   | 8   | 6   | 15  | 15  |
| SMMPA02446 | 34 | 27 | 24 | 36  | 44  | 47  | 40  | 57  | 49  |
| SMMPA02447 | 31 | 38 | 33 | 51  | 73  | 40  | 50  | 66  | 64  |
| SMMPA02448 | 14 | 14 | 23 | 34  | 20  | 25  | 28  | 25  | 22  |
| SMMPA02449 | 31 | 33 | 32 | 76  | 94  | 72  | 61  | 59  | 75  |
| SMMPA02450 | 17 | 21 | 20 | 82  | 70  | 47  | 40  | 54  | 56  |
| SMMPA02451 | 25 | 29 | 22 | 47  | 44  | 40  | 30  | 44  | 39  |
| SMMPA02452 | 20 | 23 | 9  | 30  | 25  | 29  | 26  | 29  | 23  |
| SMMPA02453 | 37 | 39 | 32 | 101 | 105 | 66  | 66  | 58  | 71  |
| SMMPA02454 | 20 | 16 | 13 | 33  | 26  | 26  | 24  | 42  | 27  |
| SMMPA02455 | 18 | 20 | 21 | 53  | 45  | 43  | 19  | 25  | 29  |
| SMMPA02456 | 27 | 37 | 21 | 31  | 25  | 26  | 25  | 38  | 39  |
| SMMPA02457 | 13 | 5  | 10 | 31  | 35  | 18  | 20  | 21  | 21  |
| SMMPA02458 | 9  | 12 | 6  | 33  | 33  | 19  | 12  | 15  | 27  |
| SMMPA02459 | 29 | 20 | 27 | 51  | 49  | 50  | 26  | 27  | 26  |
| SMMPA02460 | 10 | 15 | 13 | 18  | 21  | 17  | 11  | 20  | 15  |
| SMMPA02461 | 19 | 19 | 20 | 37  | 37  | 40  | 19  | 32  | 35  |
| SMMPA02462 | 26 | 15 | 14 | 34  | 29  | 27  | 14  | 19  | 11  |
| SMMPA02463 | 19 | 15 | 25 | 50  | 45  | 40  | 44  | 43  | 58  |

|            |    |    |    |     |     |     |     |     |     |
|------------|----|----|----|-----|-----|-----|-----|-----|-----|
| SMMPA02464 | 28 | 19 | 25 | 53  | 48  | 41  | 39  | 42  | 69  |
| SMMPA02465 | 31 | 22 | 21 | 105 | 120 | 75  | 42  | 56  | 58  |
| SMMPA02466 | 10 | 13 | 7  | 61  | 52  | 32  | 27  | 34  | 35  |
| SMMPA02467 | 9  | 21 | 20 | 88  | 72  | 67  | 33  | 42  | 26  |
| SMMPA02468 | 33 | 28 | 24 | 52  | 41  | 40  | 36  | 45  | 49  |
| SMMPA02469 | 33 | 32 | 31 | 92  | 80  | 98  | 50  | 83  | 82  |
| SMMPA02470 | 24 | 30 | 22 | 128 | 117 | 108 | 48  | 58  | 48  |
| SMMPA02471 | 13 | 14 | 13 | 40  | 41  | 23  | 32  | 38  | 43  |
| SMMPA02472 | 48 | 40 | 32 | 208 | 198 | 144 | 80  | 95  | 99  |
| SMMPA02473 | 22 | 26 | 13 | 87  | 94  | 88  | 70  | 76  | 74  |
| SMMPA02474 | 26 | 22 | 31 | 220 | 203 | 209 | 131 | 162 | 125 |
| SMMPA02475 | 17 | 14 | 9  | 85  | 73  | 71  | 39  | 44  | 44  |
| SMMPA02476 | 10 | 10 | 7  | 9   | 13  | 14  | 12  | 13  | 19  |
| SMMPA02477 | 12 | 11 | 11 | 33  | 23  | 17  | 21  | 22  | 24  |
| SMMPA02478 | 18 | 9  | 20 | 38  | 45  | 39  | 25  | 29  | 27  |
| SMMPA02479 | 25 | 30 | 23 | 111 | 86  | 79  | 59  | 71  | 46  |
| SMMPA02480 | 16 | 20 | 16 | 27  | 31  | 16  | 26  | 35  | 34  |
| SMMPA02481 | 19 | 16 | 17 | 36  | 51  | 30  | 34  | 26  | 33  |
| SMMPA02482 | 23 | 22 | 30 | 44  | 42  | 32  | 37  | 33  | 37  |
| SMMPA02483 | 10 | 15 | 11 | 24  | 33  | 23  | 16  | 22  | 22  |
| SMMPA02484 | 54 | 50 | 47 | 59  | 57  | 56  | 48  | 49  | 51  |
| SMMPA02485 | 20 | 26 | 21 | 46  | 49  | 38  | 23  | 42  | 48  |
| SMMPA02486 | 19 | 23 | 25 | 33  | 24  | 32  | 20  | 24  | 28  |
| SMMPA02487 | 21 | 15 | 23 | 46  | 29  | 29  | 39  | 31  | 42  |
| SMMPA02488 | 15 | 19 | 16 | 29  | 32  | 35  | 21  | 37  | 39  |
| SMMPA02489 | 23 | 21 | 19 | 53  | 31  | 37  | 52  | 53  | 48  |
| SMMPA02490 | 15 | 28 | 23 | 80  | 70  | 59  | 53  | 52  | 58  |
| SMMPA02491 | 33 | 44 | 35 | 111 | 109 | 67  | 64  | 87  | 67  |
| SMMPA02492 | 18 | 17 | 19 | 52  | 61  | 54  | 41  | 52  | 49  |
| SMMPA02493 | 23 | 25 | 23 | 752 | 729 | 670 | 319 | 425 | 349 |
| SMMPA02494 | 15 | 16 | 15 | 80  | 57  | 50  | 33  | 52  | 40  |
| SMMPA02495 | 18 | 21 | 21 | 45  | 58  | 39  | 39  | 52  | 32  |
| SMMPA02496 | 36 | 33 | 31 | 695 | 638 | 533 | 387 | 539 | 459 |
| SMMPA02497 | 17 | 14 | 14 | 49  | 44  | 42  | 26  | 26  | 21  |
| SMMPA02498 | 19 | 25 | 22 | 106 | 75  | 69  | 75  | 102 | 104 |
| SMMPA02499 | 27 | 40 | 26 | 199 | 173 | 138 | 136 | 181 | 204 |
| SMMPA02500 | 24 | 29 | 21 | 82  | 65  | 46  | 43  | 62  | 49  |
| SMMPA02501 | 29 | 27 | 29 | 275 | 238 | 191 | 97  | 124 | 144 |
| SMMPA02502 | 16 | 16 | 18 | 43  | 59  | 37  | 32  | 31  | 32  |
| SMMPA02503 | 17 | 20 | 18 | 96  | 84  | 68  | 51  | 63  | 60  |
| SMMPA02504 | 29 | 32 | 25 | 156 | 120 | 87  | 99  | 123 | 114 |

|            |    |    |    |     |     |     |     |     |     |
|------------|----|----|----|-----|-----|-----|-----|-----|-----|
| SMMPA02505 | 8  | 10 | 11 | 78  | 65  | 60  | 15  | 30  | 24  |
| SMMPA02506 | 16 | 21 | 30 | 64  | 47  | 56  | 30  | 46  | 32  |
| SMMPA02507 | 33 | 33 | 42 | 309 | 249 | 192 | 113 | 150 | 149 |
| SMMPA02508 | 26 | 33 | 19 | 89  | 92  | 63  | 57  | 60  | 61  |
| SMMPA02509 | 26 | 31 | 27 | 47  | 30  | 41  | 34  | 57  | 38  |
| SMMPA02510 | 12 | 9  | 10 | 8   | 16  | 19  | 11  | 12  | 13  |
| SMMPA02511 | 24 | 18 | 12 | 59  | 54  | 40  | 24  | 38  | 37  |
| SMMPA02512 | 24 | 26 | 20 | 30  | 31  | 30  | 30  | 53  | 51  |
| SMMPA02513 | 28 | 21 | 24 | 82  | 99  | 80  | 52  | 61  | 46  |
| SMMPA02514 | 23 | 29 | 25 | 88  | 89  | 66  | 41  | 62  | 44  |
| SMMPA02515 | 17 | 23 | 25 | 160 | 123 | 103 | 38  | 70  | 51  |
| SMMPA02516 | 23 | 22 | 22 | 194 | 171 | 147 | 76  | 117 | 117 |
| SMMPA02517 | 13 | 13 | 14 | 18  | 21  | 23  | 16  | 26  | 22  |
| SMMPA02518 | 26 | 30 | 16 | 33  | 24  | 30  | 28  | 38  | 41  |
| SMMPA02519 | 30 | 26 | 17 | 46  | 34  | 30  | 23  | 41  | 38  |
| SMMPA02520 | 27 | 19 | 24 | 63  | 47  | 47  | 42  | 46  | 44  |
| SMMPA02521 | 23 | 32 | 23 | 173 | 166 | 144 | 90  | 129 | 120 |
| SMMPA02522 | 27 | 25 | 25 | 317 | 238 | 195 | 121 | 167 | 140 |
| SMMPA02523 | 16 | 33 | 28 | 203 | 194 | 150 | 94  | 127 | 114 |
| SMMPA02524 | 26 | 26 | 21 | 127 | 119 | 103 | 82  | 104 | 77  |
| SMMPA02525 | 4  | 8  | 2  | 43  | 43  | 33  | 21  | 37  | 28  |
| SMMPA02526 | 21 | 32 | 33 | 116 | 97  | 102 | 52  | 78  | 57  |
| SMMPA02527 | 6  | 7  | 9  | 14  | 6   | 9   | 13  | 13  | 12  |
| SMMPA02528 | 17 | 26 | 17 | 38  | 27  | 30  | 25  | 33  | 35  |
| SMMPA02529 | 17 | 27 | 28 | 57  | 63  | 46  | 36  | 40  | 39  |
| SMMPA02530 | 32 | 27 | 23 | 42  | 35  | 37  | 34  | 40  | 28  |
| SMMPA02531 | 21 | 14 | 7  | 21  | 27  | 15  | 21  | 24  | 16  |
| SMMPA02532 | 23 | 29 | 29 | 26  | 32  | 28  | 22  | 26  | 35  |
| SMMPA02533 | 24 | 20 | 18 | 30  | 28  | 36  | 18  | 24  | 28  |
| SMMPA02534 | 29 | 26 | 19 | 42  | 72  | 50  | 36  | 42  | 62  |
| SMMPA02535 | 8  | 15 | 15 | 106 | 94  | 80  | 34  | 64  | 59  |
| SMMPA02536 | 31 | 38 | 45 | 65  | 59  | 54  | 47  | 52  | 53  |
| SMMPA02537 | 25 | 32 | 22 | 122 | 77  | 60  | 43  | 43  | 61  |
| SMMPA02538 | 33 | 34 | 33 | 171 | 165 | 128 | 90  | 138 | 110 |
| SMMPA02539 | 20 | 27 | 21 | 35  | 31  | 33  | 26  | 33  | 30  |
| SMMPA02540 | 21 | 18 | 13 | 44  | 39  | 31  | 27  | 31  | 27  |
| SMMPA02541 | 17 | 12 | 12 | 61  | 42  | 32  | 21  | 25  | 23  |
| SMMPA02542 | 37 | 34 | 27 | 103 | 83  | 72  | 60  | 68  | 48  |
| SMMPA02543 | 23 | 40 | 26 | 76  | 60  | 61  | 32  | 46  | 44  |
| SMMPA02544 | 17 | 23 | 18 | 90  | 77  | 56  | 36  | 66  | 47  |
| SMMPA02545 | 25 | 32 | 33 | 423 | 401 | 336 | 189 | 220 | 212 |

|            |    |    |    |     |     |     |     |     |     |
|------------|----|----|----|-----|-----|-----|-----|-----|-----|
| SMMPA02546 | 31 | 35 | 34 | 318 | 316 | 248 | 85  | 103 | 102 |
| SMMPA02547 | 13 | 12 | 15 | 14  | 18  | 13  | 24  | 25  | 35  |
| SMMPA02548 | 18 | 10 | 11 | 27  | 18  | 19  | 17  | 18  | 24  |
| SMMPA02549 | 11 | 28 | 19 | 24  | 27  | 27  | 14  | 20  | 18  |
| SMMPA02550 | 7  | 6  | 6  | 6   | 5   | 6   | 4   | 13  | 10  |
| SMMPA02551 | 28 | 18 | 23 | 25  | 26  | 17  | 37  | 62  | 67  |
| SMMPA02552 | 31 | 26 | 21 | 30  | 28  | 28  | 37  | 58  | 48  |
| SMMPA02553 | 13 | 24 | 11 | 24  | 22  | 17  | 32  | 42  | 41  |
| SMMPA02554 | 17 | 9  | 20 | 18  | 14  | 17  | 30  | 31  | 43  |
| SMMPA02555 | 8  | 11 | 15 | 11  | 12  | 15  | 16  | 21  | 14  |
| SMMPA02556 | 10 | 21 | 9  | 73  | 69  | 47  | 61  | 66  | 47  |
| SMMPA02557 | 21 | 14 | 22 | 132 | 93  | 91  | 46  | 63  | 55  |
| SMMPA02558 | 31 | 30 | 29 | 482 | 402 | 332 | 243 | 297 | 266 |
| SMMPA02559 | 16 | 14 | 20 | 115 | 96  | 105 | 27  | 31  | 29  |
| SMMPA02560 | 13 | 21 | 17 | 88  | 67  | 55  | 29  | 51  | 36  |
| SMMPA02561 | 44 | 36 | 36 | 87  | 93  | 93  | 41  | 47  | 42  |
| SMMPA02562 | 18 | 11 | 7  | 31  | 30  | 18  | 40  | 47  | 45  |
| SMMPA02563 | 22 | 18 | 13 | 32  | 25  | 33  | 27  | 45  | 44  |
| SMMPA02564 | 14 | 12 | 20 | 18  | 30  | 15  | 17  | 26  | 16  |
| SMMPA02565 | 18 | 22 | 22 | 19  | 16  | 16  | 14  | 20  | 31  |
| SMMPA02566 | 14 | 10 | 12 | 24  | 16  | 14  | 12  | 12  | 14  |
| SMMPA02567 | 17 | 14 | 13 | 10  | 15  | 21  | 12  | 26  | 18  |
| SMMPA02568 | 11 | 26 | 27 | 84  | 59  | 46  | 49  | 55  | 52  |
| SMMPA02569 | 44 | 46 | 32 | 38  | 45  | 44  | 29  | 47  | 50  |
| SMMPA02570 | 13 | 11 | 16 | 23  | 25  | 27  | 27  | 26  | 30  |
| SMMPA02571 | 24 | 22 | 18 | 35  | 51  | 45  | 41  | 62  | 58  |
| SMMPA02572 | 24 | 23 | 19 | 25  | 22  | 23  | 31  | 28  | 36  |
| SMMPA02573 | 4  | 1  | 5  | 2   | 4   | 2   | 2   | 7   | 6   |
| SMMPA02574 | 71 | 67 | 69 | 230 | 203 | 169 | 144 | 152 | 122 |
| SMMPA02575 | 5  | 7  | 2  | 20  | 15  | 15  | 10  | 24  | 15  |
| SMMPA02576 | 12 | 10 | 12 | 281 | 254 | 191 | 154 | 203 | 170 |
| SMMPA02577 | 17 | 16 | 7  | 42  | 44  | 35  | 27  | 37  | 33  |
| SMMPA02578 | 28 | 32 | 23 | 154 | 169 | 141 | 63  | 82  | 82  |
| SMMPA02579 | 8  | 14 | 13 | 27  | 37  | 15  | 5   | 25  | 15  |
| SMMPA02580 | 31 | 23 | 23 | 124 | 117 | 94  | 66  | 64  | 76  |
| SMMPA02581 | 51 | 47 | 49 | 212 | 189 | 156 | 71  | 105 | 93  |
| SMMPA02582 | 21 | 19 | 15 | 219 | 189 | 136 | 99  | 115 | 97  |
| SMMPA02583 | 10 | 12 | 10 | 78  | 95  | 58  | 32  | 53  | 58  |
| SMMPA02584 | 12 | 21 | 10 | 172 | 132 | 137 | 62  | 78  | 65  |
| SMMPA02585 | 32 | 21 | 26 | 264 | 256 | 183 | 99  | 124 | 116 |
| SMMPA02586 | 6  | 18 | 23 | 79  | 76  | 55  | 45  | 66  | 49  |



|            |    |    |    |     |     |     |     |     |     |
|------------|----|----|----|-----|-----|-----|-----|-----|-----|
| SMMPA02587 | 12 | 15 | 17 | 106 | 102 | 89  | 50  | 64  | 60  |
| SMMPA02588 | 14 | 14 | 20 | 156 | 141 | 130 | 53  | 74  | 75  |
| SMMPA02589 | 9  | 15 | 8  | 178 | 150 | 142 | 56  | 74  | 71  |
| SMMPA02590 | 13 | 10 | 12 | 43  | 27  | 30  | 23  | 33  | 31  |
| SMMPA02591 | 25 | 23 | 27 | 48  | 38  | 47  | 40  | 45  | 47  |
| SMMPA02592 | 13 | 16 | 19 | 38  | 38  | 49  | 32  | 31  | 34  |
| SMMPA02593 | 4  | 12 | 12 | 25  | 23  | 27  | 14  | 19  | 21  |
| SMMPA02594 | 22 | 16 | 18 | 47  | 53  | 44  | 41  | 53  | 56  |
| SMMPA02595 | 11 | 9  | 15 | 13  | 8   | 11  | 12  | 20  | 11  |
| SMMPA02596 | 8  | 12 | 14 | 16  | 19  | 19  | 13  | 23  | 21  |
| SMMPA02597 | 16 | 25 | 5  | 46  | 48  | 36  | 23  | 34  | 35  |
| SMMPA02598 | 7  | 5  | 1  | 9   | 6   | 14  | 4   | 14  | 20  |
| SMMPA02599 | 11 | 8  | 13 | 28  | 17  | 16  | 19  | 20  | 30  |
| SMMPA02600 | 21 | 26 | 23 | 60  | 39  | 39  | 40  | 37  | 52  |
| SMMPA02601 | 14 | 15 | 10 | 38  | 39  | 30  | 27  | 36  | 29  |
| SMMPA02602 | 34 | 32 | 27 | 54  | 60  | 31  | 38  | 48  | 52  |
| SMMPA02603 | 12 | 17 | 17 | 84  | 60  | 51  | 66  | 88  | 77  |
| SMMPA02604 | 14 | 18 | 11 | 41  | 38  | 25  | 22  | 37  | 27  |
| SMMPA02605 | 22 | 15 | 14 | 48  | 38  | 25  | 31  | 51  | 48  |
| SMMPA02606 | 16 | 15 | 12 | 119 | 106 | 87  | 47  | 73  | 64  |
| SMMPA02607 | 21 | 26 | 27 | 651 | 644 | 515 | 569 | 736 | 687 |
| SMMPA02608 | 30 | 20 | 25 | 23  | 27  | 20  | 27  | 23  | 32  |
| SMMPA02609 | 14 | 22 | 20 | 35  | 37  | 31  | 37  | 43  | 35  |
| SMMPA02610 | 17 | 15 | 10 | 19  | 19  | 16  | 28  | 26  | 22  |
| SMMPA02611 | 14 | 17 | 7  | 17  | 18  | 9   | 18  | 16  | 19  |
| SMMPA02612 | 46 | 32 | 32 | 45  | 42  | 36  | 52  | 59  | 70  |
| SMMPA02613 | 10 | 13 | 13 | 17  | 26  | 14  | 16  | 39  | 15  |
| SMMPA02614 | 4  | 5  | 5  | 61  | 43  | 42  | 30  | 43  | 40  |
| SMMPA02615 | 17 | 11 | 15 | 159 | 150 | 111 | 81  | 111 | 114 |
| SMMPA02616 | 19 | 9  | 15 | 159 | 131 | 105 | 52  | 75  | 69  |
| SMMPA02617 | 20 | 12 | 14 | 92  | 103 | 63  | 31  | 46  | 53  |
| SMMPA02618 | 33 | 19 | 23 | 191 | 169 | 104 | 48  | 76  | 68  |
| SMMPA02619 | 17 | 18 | 16 | 153 | 132 | 113 | 65  | 99  | 96  |
| SMMPA02620 | 4  | 4  | 8  | 51  | 54  | 64  | 32  | 32  | 37  |
| SMMPA02621 | 24 | 29 | 21 | 200 | 168 | 148 | 76  | 86  | 83  |
| SMMPA02622 | 34 | 28 | 34 | 272 | 257 | 173 | 82  | 118 | 117 |
| SMMPA02623 | 13 | 5  | 5  | 44  | 35  | 31  | 31  | 18  | 22  |
| SMMPA02624 | 28 | 22 | 28 | 29  | 27  | 27  | 25  | 34  | 39  |
| SMMPA02625 | 19 | 34 | 29 | 62  | 62  | 52  | 43  | 70  | 51  |
| SMMPA02626 | 11 | 11 | 12 | 7   | 9   | 13  | 24  | 24  | 21  |
| SMMPA02627 | 25 | 26 | 25 | 59  | 41  | 32  | 47  | 54  | 50  |

|            |    |    |    |     |     |     |    |    |    |
|------------|----|----|----|-----|-----|-----|----|----|----|
| SMMPA02628 | 15 | 23 | 15 | 21  | 17  | 16  | 8  | 26 | 16 |
| SMMPA02629 | 31 | 32 | 33 | 56  | 53  | 48  | 36 | 68 | 63 |
| SMMPA02630 | 23 | 22 | 25 | 25  | 23  | 27  | 23 | 29 | 43 |
| SMMPA02631 | 39 | 37 | 30 | 99  | 95  | 91  | 48 | 55 | 61 |
| SMMPA02632 | 25 | 15 | 17 | 23  | 15  | 17  | 19 | 22 | 27 |
| SMMPA02633 | 30 | 18 | 18 | 32  | 22  | 22  | 31 | 37 | 35 |
| SMMPA02634 | 32 | 25 | 25 | 41  | 55  | 41  | 35 | 47 | 50 |
| SMMPA02635 | 23 | 21 | 25 | 40  | 44  | 31  | 66 | 83 | 84 |
| SMMPA02636 | 20 | 13 | 13 | 21  | 12  | 13  | 14 | 24 | 28 |
| SMMPA02637 | 25 | 13 | 24 | 20  | 21  | 28  | 35 | 27 | 33 |
| SMMPA02638 | 20 | 13 | 23 | 49  | 30  | 39  | 17 | 19 | 30 |
| SMMPA02639 | 20 | 15 | 21 | 12  | 25  | 19  | 24 | 28 | 31 |
| SMMPA02640 | 13 | 20 | 13 | 15  | 11  | 14  | 18 | 25 | 17 |
| SMMPA02641 | 20 | 28 | 12 | 26  | 25  | 19  | 22 | 27 | 32 |
| SMMPA02642 | 10 | 13 | 14 | 15  | 17  | 13  | 14 | 15 | 21 |
| SMMPA02643 | 28 | 34 | 28 | 39  | 40  | 24  | 47 | 42 | 39 |
| SMMPA02644 | 30 | 30 | 24 | 116 | 76  | 73  | 43 | 65 | 62 |
| SMMPA02645 | 21 | 17 | 19 | 56  | 44  | 35  | 36 | 40 | 39 |
| SMMPA02646 | 8  | 14 | 8  | 8   | 7   | 3   | 10 | 11 | 6  |
| SMMPA02647 | 11 | 18 | 16 | 53  | 41  | 46  | 28 | 42 | 42 |
| SMMPA02648 | 20 | 25 | 23 | 21  | 21  | 23  | 20 | 34 | 21 |
| SMMPA02649 | 28 | 22 | 28 | 41  | 38  | 28  | 36 | 59 | 41 |
| SMMPA02650 | 18 | 14 | 12 | 10  | 17  | 21  | 16 | 22 | 12 |
| SMMPA02651 | 41 | 48 | 33 | 83  | 72  | 43  | 57 | 62 | 59 |
| SMMPA02652 | 28 | 34 | 15 | 26  | 35  | 28  | 29 | 33 | 36 |
| SMMPA02653 | 20 | 22 | 11 | 38  | 43  | 38  | 45 | 37 | 42 |
| SMMPA02654 | 11 | 9  | 5  | 14  | 8   | 7   | 15 | 6  | 15 |
| SMMPA02655 | 5  | 8  | 3  | 38  | 26  | 17  | 9  | 21 | 22 |
| SMMPA02656 | 6  | 9  | 11 | 9   | 12  | 6   | 7  | 14 | 19 |
| SMMPA02657 | 3  | 12 | 5  | 19  | 3   | 5   | 9  | 17 | 15 |
| SMMPA02658 | 9  | 8  | 9  | 21  | 20  | 27  | 16 | 31 | 34 |
| SMMPA02659 | 7  | 8  | 7  | 13  | 8   | 5   | 10 | 11 | 11 |
| SMMPA02660 | 16 | 29 | 27 | 14  | 31  | 23  | 25 | 38 | 43 |
| SMMPA02661 | 5  | 2  | 4  | 6   | 4   | 5   | 4  | 9  | 13 |
| SMMPA02662 | 12 | 16 | 10 | 20  | 7   | 14  | 9  | 15 | 19 |
| SMMPA02663 | 13 | 18 | 20 | 38  | 38  | 27  | 25 | 25 | 33 |
| SMMPA02664 | 13 | 19 | 9  | 156 | 121 | 127 | 45 | 61 | 70 |
| SMMPA02665 | 34 | 36 | 36 | 61  | 63  | 55  | 46 | 65 | 52 |
| SMMPA02666 | 23 | 28 | 25 | 109 | 87  | 78  | 59 | 79 | 77 |
| SMMPA02667 | 24 | 20 | 14 | 41  | 49  | 37  | 53 | 76 | 70 |
| SMMPA02668 | 22 | 22 | 21 | 47  | 35  | 36  | 36 | 50 | 45 |

|            |    |    |    |     |     |     |     |     |     |
|------------|----|----|----|-----|-----|-----|-----|-----|-----|
| SMMPA02669 | 21 | 18 | 16 | 163 | 156 | 119 | 86  | 112 | 109 |
| SMMPA02670 | 10 | 11 | 13 | 59  | 61  | 45  | 41  | 47  | 41  |
| SMMPA02671 | 19 | 32 | 25 | 27  | 32  | 26  | 46  | 67  | 59  |
| SMMPA02672 | 26 | 21 | 20 | 48  | 29  | 27  | 28  | 34  | 33  |
| SMMPA02673 | 15 | 14 | 12 | 44  | 33  | 32  | 36  | 42  | 40  |
| SMMPA02674 | 8  | 19 | 13 | 12  | 13  | 17  | 19  | 17  | 19  |
| SMMPA02675 | 20 | 11 | 16 | 15  | 10  | 19  | 8   | 11  | 23  |
| SMMPA02676 | 15 | 21 | 16 | 21  | 21  | 13  | 29  | 46  | 40  |
| SMMPA02677 | 14 | 13 | 10 | 9   | 9   | 6   | 16  | 14  | 15  |
| SMMPA02678 | 10 | 9  | 13 | 9   | 9   | 2   | 8   | 5   | 7   |
| SMMPA02679 | 21 | 17 | 25 | 70  | 44  | 45  | 15  | 31  | 29  |
| SMMPA02680 | 9  | 13 | 10 | 18  | 11  | 14  | 24  | 30  | 20  |
| SMMPA02681 | 15 | 12 | 14 | 270 | 216 | 199 | 75  | 116 | 100 |
| SMMPA02682 | 15 | 12 | 15 | 85  | 67  | 38  | 37  | 36  | 33  |
| SMMPA02683 | 20 | 22 | 33 | 183 | 169 | 95  | 57  | 80  | 71  |
| SMMPA02684 | 31 | 17 | 13 | 82  | 68  | 57  | 37  | 47  | 49  |
| SMMPA02685 | 9  | 9  | 10 | 10  | 12  | 10  | 4   | 8   | 10  |
| SMMPA02686 | 29 | 32 | 34 | 473 | 434 | 354 | 204 | 281 | 273 |
| SMMPA02687 | 28 | 32 | 38 | 133 | 122 | 106 | 58  | 82  | 83  |
| SMMPA02688 | 8  | 13 | 10 | 190 | 157 | 163 | 81  | 89  | 105 |
| SMMPA02689 | 28 | 14 | 29 | 87  | 86  | 62  | 49  | 56  | 63  |
| SMMPA02690 | 18 | 24 | 14 | 157 | 123 | 118 | 65  | 89  | 84  |
| SMMPA02691 | 14 | 24 | 9  | 54  | 49  | 31  | 23  | 43  | 38  |
| SMMPA02692 | 25 | 27 | 18 | 35  | 21  | 21  | 28  | 33  | 28  |
| SMMPA02693 | 28 | 33 | 26 | 36  | 27  | 32  | 37  | 42  | 42  |
| SMMPA02694 | 7  | 12 | 6  | 16  | 9   | 7   | 15  | 11  | 11  |
| SMMPA02695 | 19 | 21 | 18 | 18  | 29  | 25  | 37  | 35  | 30  |
| SMMPA02696 | 29 | 37 | 22 | 59  | 57  | 37  | 50  | 74  | 52  |
| SMMPA02697 | 45 | 26 | 26 | 88  | 69  | 64  | 53  | 61  | 53  |
| SMMPA02698 | 12 | 13 | 7  | 16  | 11  | 14  | 27  | 30  | 23  |
| SMMPA02699 | 15 | 21 | 24 | 36  | 32  | 49  | 16  | 22  | 28  |
| SMMPA02700 | 18 | 29 | 15 | 29  | 32  | 29  | 15  | 32  | 34  |
| SMMPA02701 | 42 | 55 | 47 | 80  | 92  | 52  | 50  | 72  | 74  |
| SMMPA02702 | 21 | 15 | 21 | 95  | 92  | 80  | 39  | 52  | 32  |
| SMMPA02703 | 19 | 13 | 20 | 36  | 38  | 25  | 20  | 31  | 18  |
| SMMPA02704 | 2  | 11 | 4  | 9   | 13  | 8   | 11  | 13  | 11  |
| SMMPA02705 | 37 | 46 | 52 | 94  | 73  | 64  | 46  | 81  | 65  |
| SMMPA02706 | 30 | 22 | 16 | 42  | 42  | 32  | 21  | 35  | 32  |
| SMMPA02707 | 30 | 22 | 25 | 63  | 51  | 38  | 33  | 48  | 39  |
| SMMPA02708 | 28 | 29 | 44 | 37  | 43  | 34  | 27  | 40  | 38  |
| SMMPA02709 | 13 | 13 | 12 | 9   | 7   | 15  | 8   | 8   | 13  |

|            |    |    |    |     |     |     |     |     |     |
|------------|----|----|----|-----|-----|-----|-----|-----|-----|
| SMMPA02710 | 11 | 17 | 13 | 49  | 53  | 44  | 29  | 61  | 40  |
| SMMPA02711 | 25 | 35 | 37 | 112 | 89  | 64  | 49  | 56  | 55  |
| SMMPA02712 | 7  | 5  | 5  | 17  | 24  | 21  | 16  | 19  | 21  |
| SMMPA02713 | 39 | 40 | 36 | 129 | 109 | 82  | 71  | 92  | 92  |
| SMMPA02714 | 18 | 12 | 16 | 44  | 40  | 37  | 46  | 62  | 48  |
| SMMPA02715 | 25 | 31 | 27 | 78  | 62  | 57  | 48  | 57  | 47  |
| SMMPA02716 | 20 | 20 | 17 | 91  | 76  | 62  | 45  | 47  | 51  |
| SMMPA02717 | 11 | 21 | 5  | 24  | 23  | 12  | 17  | 21  | 19  |
| SMMPA02718 | 13 | 17 | 10 | 32  | 33  | 28  | 26  | 27  | 29  |
| SMMPA02719 | 11 | 18 | 15 | 39  | 32  | 25  | 22  | 42  | 24  |
| SMMPA02720 | 50 | 39 | 33 | 129 | 132 | 97  | 94  | 120 | 122 |
| SMMPA02721 | 22 | 36 | 25 | 176 | 160 | 134 | 75  | 107 | 70  |
| SMMPA02722 | 24 | 22 | 18 | 333 | 278 | 219 | 112 | 159 | 159 |
| SMMPA02723 | 10 | 21 | 15 | 116 | 125 | 93  | 42  | 44  | 56  |
| SMMPA02724 | 22 | 16 | 8  | 64  | 68  | 56  | 38  | 47  | 39  |
| SMMPA02725 | 8  | 23 | 17 | 139 | 137 | 123 | 59  | 104 | 110 |
| SMMPA02726 | 16 | 15 | 15 | 103 | 105 | 95  | 45  | 78  | 59  |
| SMMPA02727 | 35 | 46 | 29 | 152 | 133 | 110 | 93  | 112 | 106 |
| SMMPA02728 | 12 | 22 | 16 | 113 | 88  | 73  | 32  | 39  | 46  |
| SMMPA02729 | 34 | 16 | 19 | 94  | 94  | 76  | 50  | 73  | 63  |
| SMMPA02730 | 14 | 15 | 11 | 79  | 59  | 71  | 40  | 35  | 35  |
| SMMPA02731 | 15 | 33 | 25 | 93  | 94  | 58  | 40  | 33  | 45  |
| SMMPA02732 | 38 | 39 | 38 | 217 | 157 | 161 | 100 | 146 | 107 |
| SMMPA02733 | 8  | 10 | 14 | 144 | 122 | 108 | 94  | 114 | 90  |
| SMMPA02734 | 23 | 22 | 23 | 86  | 81  | 72  | 39  | 40  | 37  |
| SMMPA02735 | 22 | 27 | 22 | 141 | 144 | 89  | 57  | 80  | 68  |
| SMMPA02736 | 15 | 12 | 7  | 84  | 82  | 70  | 32  | 44  | 37  |
| SMMPA02737 | 14 | 6  | 8  | 44  | 33  | 38  | 21  | 22  | 20  |
| SMMPA02738 | 19 | 22 | 19 | 386 | 360 | 318 | 141 | 217 | 169 |
| SMMPA02739 | 14 | 20 | 16 | 139 | 126 | 93  | 47  | 65  | 63  |
| SMMPA02740 | 15 | 12 | 12 | 19  | 15  | 15  | 18  | 38  | 25  |
| SMMPA02741 | 27 | 28 | 16 | 58  | 58  | 32  | 50  | 58  | 51  |
| SMMPA02742 | 21 | 12 | 26 | 81  | 86  | 52  | 69  | 73  | 86  |
| SMMPA02743 | 18 | 18 | 30 | 84  | 84  | 74  | 54  | 55  | 77  |
| SMMPA02744 | 16 | 29 | 20 | 63  | 69  | 45  | 58  | 72  | 74  |
| SMMPA02745 | 24 | 25 | 28 | 58  | 52  | 52  | 33  | 69  | 51  |
| SMMPA02746 | 12 | 6  | 9  | 39  | 28  | 24  | 23  | 41  | 39  |
| SMMPA02747 | 31 | 21 | 21 | 92  | 79  | 59  | 101 | 96  | 85  |
| SMMPA02748 | 41 | 35 | 26 | 103 | 92  | 82  | 95  | 128 | 131 |
| SMMPA02749 | 22 | 15 | 11 | 34  | 40  | 24  | 34  | 42  | 43  |
| SMMPA02750 | 33 | 20 | 22 | 111 | 91  | 80  | 84  | 103 | 80  |

|            |    |    |    |     |     |     |     |     |     |
|------------|----|----|----|-----|-----|-----|-----|-----|-----|
| SMMPA02751 | 26 | 17 | 15 | 120 | 94  | 98  | 42  | 47  | 54  |
| SMMPA02752 | 10 | 10 | 11 | 29  | 31  | 24  | 19  | 25  | 18  |
| SMMPA02753 | 16 | 20 | 11 | 60  | 50  | 45  | 32  | 40  | 29  |
| SMMPA02754 | 9  | 12 | 6  | 48  | 51  | 44  | 18  | 25  | 17  |
| SMMPA02755 | 30 | 35 | 23 | 157 | 123 | 105 | 67  | 94  | 88  |
| SMMPA02756 | 22 | 19 | 14 | 237 | 213 | 183 | 92  | 97  | 99  |
| SMMPA02757 | 19 | 16 | 18 | 128 | 118 | 103 | 42  | 48  | 50  |
| SMMPA02758 | 15 | 14 | 12 | 120 | 105 | 95  | 56  | 71  | 69  |
| SMMPA02759 | 32 | 21 | 25 | 146 | 116 | 93  | 71  | 84  | 92  |
| SMMPA02760 | 17 | 22 | 26 | 22  | 23  | 26  | 25  | 20  | 35  |
| SMMPA02761 | 33 | 31 | 31 | 367 | 337 | 318 | 127 | 148 | 121 |
| SMMPA02762 | 32 | 30 | 29 | 66  | 54  | 44  | 43  | 47  | 52  |
| SMMPA02763 | 25 | 35 | 27 | 58  | 62  | 39  | 44  | 41  | 48  |
| SMMPA02764 | 29 | 28 | 15 | 86  | 77  | 58  | 36  | 54  | 47  |
| SMMPA02765 | 46 | 34 | 33 | 85  | 93  | 80  | 41  | 67  | 49  |
| SMMPA02766 | 11 | 5  | 7  | 32  | 35  | 23  | 23  | 31  | 28  |
| SMMPA02767 | 21 | 16 | 7  | 79  | 69  | 62  | 41  | 57  | 43  |
| SMMPA02768 | 16 | 17 | 15 | 18  | 15  | 12  | 26  | 25  | 21  |
| SMMPA02769 | 37 | 30 | 36 | 72  | 53  | 57  | 61  | 72  | 45  |
| SMMPA02770 | 14 | 15 | 14 | 13  | 22  | 22  | 30  | 32  | 40  |
| SMMPA02771 | 32 | 28 | 31 | 21  | 17  | 27  | 39  | 50  | 50  |
| SMMPA02772 | 35 | 29 | 34 | 70  | 65  | 63  | 49  | 71  | 68  |
| SMMPA02773 | 22 | 24 | 18 | 28  | 36  | 26  | 39  | 53  | 40  |
| SMMPA02774 | 25 | 25 | 15 | 18  | 22  | 29  | 32  | 27  | 31  |
| SMMPA02775 | 37 | 46 | 29 | 136 | 146 | 109 | 67  | 77  | 87  |
| SMMPA02776 | 49 | 46 | 44 | 56  | 51  | 51  | 57  | 75  | 72  |
| SMMPA02777 | 21 | 32 | 28 | 44  | 35  | 42  | 44  | 48  | 43  |
| SMMPA02778 | 9  | 12 | 15 | 50  | 55  | 34  | 21  | 39  | 36  |
| SMMPA02779 | 6  | 5  | 3  | 18  | 16  | 19  | 8   | 16  | 13  |
| SMMPA02780 | 5  | 10 | 5  | 15  | 12  | 8   | 7   | 18  | 16  |
| SMMPA02781 | 16 | 20 | 20 | 38  | 50  | 30  | 21  | 38  | 27  |
| SMMPA02782 | 3  | 7  | 10 | 6   | 3   | 6   | 9   | 5   | 5   |
| SMMPA02783 | 15 | 9  | 11 | 23  | 28  | 19  | 18  | 20  | 20  |
| SMMPA02784 | 18 | 21 | 13 | 46  | 53  | 33  | 29  | 27  | 18  |
| SMMPA02785 | 16 | 18 | 19 | 206 | 145 | 155 | 65  | 88  | 72  |
| SMMPA02786 | 5  | 8  | 4  | 39  | 38  | 19  | 28  | 31  | 22  |
| SMMPA02787 | 16 | 11 | 13 | 130 | 96  | 91  | 78  | 96  | 91  |
| SMMPA02788 | 20 | 12 | 18 | 61  | 55  | 57  | 50  | 56  | 47  |
| SMMPA02789 | 18 | 13 | 11 | 60  | 61  | 43  | 36  | 64  | 35  |
| SMMPA02790 | 25 | 28 | 12 | 57  | 48  | 38  | 41  | 59  | 54  |
| SMMPA02791 | 10 | 12 | 9  | 43  | 36  | 33  | 41  | 45  | 46  |

|            |    |    |    |     |     |     |     |     |     |
|------------|----|----|----|-----|-----|-----|-----|-----|-----|
| SMMPA02792 | 10 | 24 | 19 | 76  | 54  | 46  | 53  | 71  | 58  |
| SMMPA02793 | 14 | 20 | 26 | 96  | 79  | 89  | 52  | 58  | 64  |
| SMMPA02794 | 9  | 16 | 18 | 21  | 30  | 28  | 34  | 41  | 31  |
| SMMPA02795 | 12 | 10 | 18 | 40  | 40  | 15  | 31  | 37  | 28  |
| SMMPA02796 | 10 | 13 | 5  | 29  | 22  | 24  | 22  | 26  | 29  |
| SMMPA02797 | 4  | 3  | 1  | 2   | 2   | 2   | 4   | 4   | 8   |
| SMMPA02798 | 12 | 11 | 16 | 46  | 38  | 32  | 35  | 40  | 49  |
| SMMPA02799 | 20 | 12 | 12 | 27  | 29  | 25  | 26  | 30  | 35  |
| SMMPA02800 | 15 | 22 | 19 | 38  | 40  | 34  | 30  | 45  | 37  |
| SMMPA02801 | 12 | 17 | 19 | 23  | 22  | 28  | 20  | 37  | 34  |
| SMMPA02802 | 20 | 27 | 22 | 29  | 16  | 13  | 20  | 24  | 32  |
| SMMPA02803 | 20 | 14 | 16 | 47  | 37  | 22  | 20  | 35  | 20  |
| SMMPA02804 | 6  | 18 | 18 | 18  | 25  | 28  | 22  | 27  | 26  |
| SMMPA02805 | 12 | 7  | 3  | 8   | 10  | 5   | 6   | 7   | 5   |
| SMMPA02806 | 19 | 14 | 13 | 12  | 15  | 16  | 15  | 10  | 17  |
| SMMPA02807 | 14 | 10 | 10 | 10  | 20  | 14  | 8   | 15  | 11  |
| SMMPA02808 | 18 | 29 | 18 | 61  | 59  | 40  | 44  | 47  | 38  |
| SMMPA02809 | 10 | 7  | 5  | 24  | 21  | 13  | 15  | 17  | 17  |
| SMMPA02810 | 18 | 18 | 17 | 46  | 32  | 43  | 24  | 32  | 23  |
| SMMPA02811 | 31 | 29 | 30 | 33  | 30  | 29  | 32  | 43  | 43  |
| SMMPA02812 | 16 | 21 | 27 | 88  | 83  | 60  | 38  | 57  | 57  |
| SMMPA02813 | 14 | 15 | 19 | 10  | 11  | 23  | 16  | 31  | 33  |
| SMMPA02814 | 18 | 15 | 18 | 19  | 21  | 17  | 17  | 18  | 17  |
| SMMPA02815 | 20 | 17 | 12 | 29  | 32  | 19  | 22  | 25  | 34  |
| SMMPA02816 | 29 | 21 | 24 | 47  | 32  | 30  | 43  | 27  | 46  |
| SMMPA02817 | 28 | 21 | 27 | 29  | 23  | 25  | 27  | 32  | 25  |
| SMMPA02818 | 22 | 25 | 19 | 16  | 21  | 28  | 25  | 29  | 28  |
| SMMPA02819 | 13 | 19 | 9  | 12  | 19  | 20  | 11  | 16  | 17  |
| SMMPA02820 | 30 | 19 | 19 | 52  | 40  | 38  | 28  | 43  | 33  |
| SMMPA02821 | 17 | 21 | 17 | 63  | 53  | 64  | 33  | 46  | 23  |
| SMMPA02822 | 39 | 43 | 40 | 103 | 116 | 71  | 52  | 91  | 66  |
| SMMPA02823 | 22 | 16 | 26 | 105 | 92  | 48  | 40  | 41  | 47  |
| SMMPA02824 | 28 | 26 | 19 | 172 | 135 | 111 | 95  | 107 | 123 |
| SMMPA02825 | 20 | 29 | 20 | 356 | 350 | 314 | 153 | 206 | 180 |
| SMMPA02826 | 20 | 18 | 26 | 148 | 141 | 104 | 58  | 69  | 71  |
| SMMPA02827 | 25 | 14 | 31 | 92  | 63  | 63  | 53  | 67  | 74  |
| SMMPA02828 | 8  | 8  | 7  | 16  | 13  | 17  | 8   | 12  | 8   |
| SMMPA02829 | 24 | 16 | 24 | 32  | 24  | 31  | 27  | 34  | 27  |
| SMMPA02830 | 13 | 14 | 21 | 42  | 52  | 52  | 28  | 30  | 25  |
| SMMPA02831 | 13 | 13 | 14 | 19  | 15  | 12  | 9   | 12  | 17  |
| SMMPA02832 | 23 | 27 | 19 | 58  | 66  | 54  | 19  | 30  | 30  |

|            |    |    |    |     |     |     |     |     |     |
|------------|----|----|----|-----|-----|-----|-----|-----|-----|
| SMMPA02833 | 0  | 0  | 3  | 9   | 29  | 13  | 7   | 7   | 10  |
| SMMPA02834 | 5  | 5  | 4  | 9   | 11  | 3   | 3   | 10  | 10  |
| SMMPA02835 | 12 | 12 | 14 | 19  | 16  | 31  | 18  | 10  | 21  |
| SMMPA02836 | 17 | 13 | 13 | 17  | 20  | 20  | 12  | 15  | 14  |
| SMMPA02837 | 16 | 18 | 13 | 34  | 29  | 23  | 34  | 41  | 51  |
| SMMPA02838 | 28 | 38 | 33 | 95  | 80  | 59  | 53  | 37  | 47  |
| SMMPA02839 | 22 | 32 | 14 | 51  | 63  | 42  | 42  | 65  | 51  |
| SMMPA02840 | 12 | 24 | 25 | 59  | 46  | 37  | 19  | 35  | 29  |
| SMMPA02841 | 28 | 24 | 21 | 67  | 63  | 59  | 39  | 55  | 44  |
| SMMPA02842 | 14 | 17 | 20 | 40  | 39  | 35  | 19  | 33  | 20  |
| SMMPA02843 | 39 | 28 | 20 | 67  | 59  | 46  | 37  | 44  | 46  |
| SMMPA02844 | 16 | 13 | 19 | 26  | 28  | 20  | 31  | 33  | 19  |
| SMMPA02845 | 18 | 24 | 18 | 15  | 17  | 18  | 22  | 20  | 22  |
| SMMPA02846 | 14 | 17 | 11 | 12  | 23  | 26  | 38  | 41  | 40  |
| SMMPA02847 | 22 | 34 | 29 | 68  | 64  | 42  | 48  | 63  | 64  |
| SMMPA02848 | 21 | 25 | 15 | 119 | 117 | 86  | 70  | 81  | 90  |
| SMMPA02849 | 19 | 34 | 25 | 104 | 94  | 64  | 69  | 106 | 78  |
| SMMPA02850 | 12 | 14 | 12 | 27  | 28  | 19  | 17  | 20  | 21  |
| SMMPA02851 | 19 | 23 | 15 | 30  | 45  | 34  | 53  | 41  | 58  |
| SMMPA02852 | 20 | 13 | 15 | 41  | 40  | 28  | 39  | 40  | 40  |
| SMMPA02853 | 19 | 22 | 25 | 87  | 68  | 70  | 49  | 65  | 64  |
| SMMPA02854 | 20 | 19 | 28 | 37  | 34  | 28  | 23  | 38  | 43  |
| SMMPA02855 | 7  | 10 | 9  | 32  | 26  | 27  | 20  | 36  | 26  |
| SMMPA02856 | 23 | 32 | 38 | 76  | 79  | 62  | 58  | 60  | 81  |
| SMMPA02857 | 5  | 12 | 10 | 54  | 45  | 41  | 25  | 36  | 32  |
| SMMPA02858 | 14 | 16 | 14 | 41  | 33  | 19  | 19  | 38  | 39  |
| SMMPA02859 | 21 | 25 | 12 | 65  | 58  | 55  | 28  | 41  | 44  |
| SMMPA02860 | 17 | 16 | 18 | 80  | 75  | 60  | 39  | 49  | 48  |
| SMMPA02861 | 54 | 51 | 43 | 50  | 44  | 40  | 40  | 75  | 71  |
| SMMPA02862 | 11 | 13 | 15 | 14  | 13  | 12  | 21  | 14  | 22  |
| SMMPA02863 | 23 | 26 | 19 | 14  | 9   | 14  | 20  | 23  | 23  |
| SMMPA02864 | 10 | 14 | 16 | 23  | 21  | 22  | 18  | 15  | 26  |
| SMMPA02865 | 15 | 14 | 14 | 240 | 215 | 151 | 65  | 85  | 75  |
| SMMPA02866 | 7  | 8  | 9  | 19  | 19  | 10  | 11  | 17  | 19  |
| SMMPA02867 | 18 | 19 | 22 | 27  | 27  | 21  | 30  | 37  | 40  |
| SMMPA02868 | 26 | 20 | 14 | 28  | 42  | 27  | 14  | 20  | 18  |
| SMMPA02869 | 7  | 8  | 6  | 17  | 26  | 17  | 20  | 12  | 16  |
| SMMPA02870 | 38 | 42 | 26 | 395 | 400 | 306 | 127 | 153 | 111 |
| SMMPA02871 | 7  | 10 | 17 | 13  | 12  | 14  | 20  | 24  | 13  |
| SMMPA02872 | 9  | 12 | 4  | 4   | 4   | 7   | 1   | 15  | 5   |
| SMMPA02873 | 18 | 22 | 16 | 13  | 15  | 15  | 20  | 27  | 26  |

|            |    |    |    |     |     |     |     |     |     |
|------------|----|----|----|-----|-----|-----|-----|-----|-----|
| SMMPA02874 | 29 | 33 | 26 | 37  | 38  | 21  | 25  | 33  | 43  |
| SMMPA02875 | 21 | 20 | 22 | 24  | 25  | 19  | 20  | 35  | 19  |
| SMMPA02876 | 8  | 9  | 8  | 2   | 0   | 2   | 8   | 11  | 7   |
| SMMPA02877 | 9  | 10 | 9  | 5   | 11  | 9   | 12  | 22  | 11  |
| SMMPA02878 | 19 | 16 | 16 | 20  | 13  | 12  | 14  | 27  | 20  |
| SMMPA02879 | 7  | 6  | 8  | 11  | 11  | 5   | 13  | 18  | 11  |
| SMMPA02880 | 22 | 26 | 20 | 32  | 29  | 32  | 33  | 35  | 40  |
| SMMPA02881 | 25 | 33 | 15 | 281 | 242 | 210 | 123 | 171 | 150 |
| SMMPA02882 | 18 | 27 | 24 | 133 | 150 | 110 | 56  | 65  | 46  |
| SMMPA02883 | 53 | 41 | 39 | 443 | 386 | 312 | 173 | 243 | 207 |
| SMMPA02884 | 12 | 16 | 12 | 21  | 15  | 20  | 13  | 19  | 27  |
| SMMPA02885 | 52 | 43 | 35 | 276 | 246 | 180 | 129 | 147 | 150 |
| SMMPA02886 | 28 | 19 | 26 | 238 | 231 | 155 | 114 | 144 | 127 |
| SMMPA02887 | 26 | 21 | 23 | 75  | 85  | 56  | 38  | 55  | 40  |
| SMMPA02888 | 20 | 23 | 23 | 410 | 436 | 326 | 219 | 242 | 267 |
| SMMPA02889 | 33 | 22 | 35 | 614 | 517 | 490 | 308 | 386 | 356 |
| SMMPA02890 | 12 | 19 | 9  | 18  | 18  | 25  | 14  | 27  | 23  |
| SMMPA02891 | 2  | 5  | 7  | 9   | 8   | 7   | 13  | 3   | 11  |
| SMMPA02892 | 20 | 18 | 21 | 47  | 42  | 36  | 28  | 50  | 39  |
| SMMPA02893 | 23 | 20 | 17 | 27  | 20  | 22  | 25  | 28  | 26  |
| SMMPA02894 | 10 | 18 | 11 | 17  | 20  | 10  | 9   | 16  | 19  |
| SMMPA02895 | 28 | 30 | 22 | 541 | 531 | 467 | 332 | 456 | 388 |
| SMMPA02896 | 27 | 23 | 25 | 78  | 75  | 70  | 28  | 55  | 73  |
| SMMPA02897 | 19 | 20 | 27 | 81  | 56  | 48  | 44  | 62  | 37  |
| SMMPA02898 | 25 | 8  | 13 | 56  | 37  | 39  | 31  | 38  | 32  |
| SMMPA02899 | 19 | 13 | 29 | 97  | 71  | 59  | 43  | 58  | 52  |
| SMMPA02900 | 71 | 56 | 69 | 95  | 92  | 71  | 68  | 87  | 87  |
| SMMPA02901 | 12 | 10 | 8  | 16  | 22  | 12  | 12  | 15  | 23  |
| SMMPA02902 | 26 | 24 | 23 | 235 | 258 | 183 | 77  | 120 | 99  |
| SMMPA02903 | 28 | 30 | 21 | 83  | 90  | 79  | 36  | 53  | 46  |
| SMMPA02904 | 12 | 22 | 21 | 69  | 48  | 58  | 22  | 35  | 25  |
| SMMPA02905 | 8  | 4  | 7  | 19  | 16  | 10  | 8   | 8   | 14  |
| SMMPA02906 | 18 | 12 | 10 | 42  | 35  | 47  | 19  | 16  | 21  |
| SMMPA02907 | 30 | 18 | 21 | 68  | 67  | 46  | 43  | 42  | 35  |
| SMMPA02908 | 10 | 15 | 20 | 77  | 40  | 41  | 34  | 39  | 27  |
| SMMPA02909 | 10 | 10 | 10 | 33  | 41  | 23  | 12  | 13  | 23  |
| SMMPA02910 | 15 | 21 | 10 | 35  | 44  | 21  | 15  | 28  | 29  |
| SMMPA02911 | 9  | 6  | 14 | 67  | 59  | 38  | 32  | 33  | 39  |
| SMMPA02912 | 29 | 17 | 14 | 132 | 127 | 96  | 61  | 86  | 93  |
| SMMPA02913 | 12 | 7  | 13 | 40  | 26  | 25  | 14  | 18  | 26  |
| SMMPA02914 | 29 | 29 | 22 | 167 | 134 | 112 | 80  | 100 | 93  |



|            |    |    |    |     |     |     |     |     |     |
|------------|----|----|----|-----|-----|-----|-----|-----|-----|
| SMMPA02915 | 24 | 32 | 21 | 127 | 126 | 88  | 87  | 111 | 100 |
| SMMPA02916 | 14 | 9  | 15 | 68  | 68  | 42  | 39  | 70  | 64  |
| SMMPA02917 | 17 | 16 | 13 | 143 | 112 | 92  | 63  | 121 | 86  |
| SMMPA02918 | 12 | 13 | 14 | 93  | 87  | 61  | 48  | 58  | 56  |
| SMMPA02919 | 14 | 14 | 10 | 19  | 25  | 16  | 25  | 38  | 25  |
| SMMPA02920 | 10 | 19 | 15 | 71  | 56  | 42  | 21  | 23  | 30  |
| SMMPA02921 | 13 | 12 | 5  | 19  | 20  | 19  | 9   | 23  | 18  |
| SMMPA02922 | 13 | 14 | 9  | 36  | 40  | 33  | 26  | 37  | 39  |
| SMMPA02923 | 24 | 22 | 23 | 533 | 473 | 422 | 157 | 245 | 189 |
| SMMPA02924 | 23 | 30 | 30 | 76  | 42  | 55  | 35  | 59  | 52  |
| SMMPA02925 | 25 | 18 | 16 | 35  | 38  | 35  | 36  | 36  | 35  |
| SMMPA02926 | 28 | 27 | 25 | 133 | 95  | 79  | 104 | 143 | 132 |
| SMMPA02927 | 16 | 11 | 10 | 60  | 52  | 36  | 40  | 51  | 44  |
| SMMPA02928 | 10 | 12 | 13 | 42  | 41  | 30  | 27  | 27  | 39  |
| SMMPA02929 | 28 | 40 | 23 | 156 | 150 | 132 | 72  | 85  | 76  |
| SMMPA02930 | 22 | 16 | 18 | 49  | 34  | 39  | 28  | 35  | 40  |
| SMMPA02931 | 39 | 58 | 38 | 87  | 89  | 78  | 74  | 98  | 67  |
| SMMPA02932 | 11 | 19 | 17 | 25  | 41  | 28  | 35  | 30  | 35  |
| SMMPA02933 | 40 | 38 | 28 | 47  | 49  | 48  | 36  | 56  | 52  |
| SMMPA02934 | 12 | 12 | 20 | 102 | 84  | 57  | 52  | 62  | 65  |
| SMMPA02935 | 16 | 11 | 15 | 46  | 46  | 45  | 23  | 35  | 38  |
| SMMPA02936 | 13 | 16 | 13 | 35  | 39  | 23  | 31  | 43  | 28  |
| SMMPA02937 | 18 | 30 | 23 | 150 | 104 | 102 | 78  | 119 | 108 |
| SMMPA02938 | 18 | 24 | 21 | 88  | 73  | 64  | 69  | 93  | 76  |
| SMMPA02939 | 12 | 10 | 7  | 31  | 23  | 24  | 23  | 25  | 27  |
| SMMPA02940 | 13 | 15 | 13 | 121 | 97  | 74  | 64  | 76  | 82  |
| SMMPA02941 | 32 | 40 | 45 | 246 | 220 | 224 | 110 | 126 | 109 |
| SMMPA02942 | 36 | 20 | 31 | 219 | 176 | 159 | 92  | 145 | 125 |
| SMMPA02943 | 13 | 19 | 13 | 69  | 79  | 53  | 68  | 95  | 90  |
| SMMPA02944 | 10 | 4  | 4  | 23  | 26  | 27  | 11  | 29  | 8   |
| SMMPA02945 | 16 | 20 | 23 | 183 | 195 | 131 | 116 | 130 | 127 |
| SMMPA02946 | 26 | 20 | 23 | 295 | 243 | 201 | 155 | 222 | 235 |
| SMMPA02947 | 24 | 30 | 21 | 141 | 116 | 100 | 67  | 83  | 88  |
| SMMPA02948 | 15 | 22 | 22 | 155 | 170 | 125 | 118 | 159 | 124 |
| SMMPA02949 | 22 | 27 | 21 | 45  | 48  | 40  | 41  | 38  | 45  |
| SMMPA02950 | 17 | 14 | 14 | 115 | 113 | 97  | 62  | 68  | 60  |
| SMMPA02951 | 12 | 10 | 22 | 59  | 60  | 37  | 28  | 59  | 40  |
| SMMPA02952 | 19 | 8  | 7  | 21  | 14  | 11  | 11  | 17  | 11  |
| SMMPA02953 | 17 | 23 | 20 | 196 | 189 | 151 | 70  | 80  | 69  |
| SMMPA02954 | 9  | 13 | 11 | 127 | 114 | 72  | 50  | 60  | 75  |
| SMMPA02955 | 14 | 6  | 11 | 122 | 110 | 93  | 50  | 66  | 70  |

|            |    |    |    |     |     |     |     |     |     |
|------------|----|----|----|-----|-----|-----|-----|-----|-----|
| SMMPA02956 | 14 | 11 | 10 | 79  | 63  | 69  | 42  | 50  | 49  |
| SMMPA02957 | 23 | 27 | 20 | 406 | 384 | 289 | 194 | 264 | 209 |
| SMMPA02958 | 14 | 12 | 16 | 389 | 328 | 296 | 153 | 187 | 149 |
| SMMPA02959 | 6  | 12 | 9  | 205 | 165 | 149 | 85  | 99  | 78  |
| SMMPA02960 | 11 | 6  | 11 | 118 | 102 | 88  | 49  | 66  | 57  |
| SMMPA02961 | 15 | 11 | 17 | 286 | 283 | 233 | 86  | 136 | 140 |
| SMMPA02962 | 18 | 18 | 16 | 201 | 161 | 135 | 89  | 116 | 103 |
| SMMPA02963 | 18 | 19 | 16 | 370 | 364 | 322 | 198 | 259 | 202 |
| SMMPA02964 | 2  | 3  | 8  | 5   | 3   | 5   | 10  | 7   | 3   |
| SMMPA02965 | 12 | 16 | 9  | 32  | 24  | 18  | 15  | 23  | 25  |
| SMMPA02966 | 12 | 9  | 1  | 7   | 2   | 6   | 9   | 7   | 4   |
| SMMPA02967 | 15 | 11 | 13 | 20  | 11  | 12  | 17  | 22  | 18  |
| SMMPA02968 | 16 | 16 | 19 | 14  | 17  | 11  | 7   | 10  | 17  |
| SMMPA02969 | 17 | 20 | 21 | 20  | 6   | 9   | 11  | 23  | 16  |
| SMMPA02970 | 17 | 17 | 21 | 16  | 11  | 11  | 10  | 28  | 23  |
| SMMPA02971 | 14 | 14 | 19 | 12  | 12  | 10  | 13  | 14  | 17  |
| SMMPA02972 | 25 | 22 | 11 | 55  | 61  | 54  | 42  | 63  | 63  |
| SMMPA02973 | 19 | 24 | 17 | 65  | 46  | 41  | 55  | 69  | 53  |
| SMMPA02974 | 30 | 17 | 18 | 64  | 54  | 38  | 37  | 53  | 53  |
| SMMPA02975 | 24 | 17 | 11 | 52  | 41  | 43  | 32  | 43  | 47  |
| SMMPA02976 | 30 | 19 | 10 | 79  | 75  | 58  | 46  | 62  | 55  |
| SMMPA02977 | 26 | 33 | 25 | 55  | 53  | 45  | 23  | 32  | 37  |
| SMMPA02978 | 19 | 19 | 14 | 148 | 131 | 103 | 71  | 84  | 78  |
| SMMPA02979 | 17 | 31 | 19 | 122 | 140 | 109 | 51  | 56  | 71  |
| SMMPA02980 | 29 | 21 | 34 | 107 | 103 | 83  | 60  | 89  | 99  |
| SMMPA02981 | 21 | 19 | 24 | 177 | 196 | 154 | 75  | 124 | 90  |
| SMMPA02982 | 39 | 43 | 49 | 255 | 228 | 191 | 153 | 164 | 172 |
| SMMPA02983 | 45 | 54 | 46 | 346 | 342 | 257 | 133 | 177 | 177 |
| SMMPA02984 | 26 | 26 | 20 | 120 | 109 | 80  | 48  | 69  | 59  |
| SMMPA02985 | 21 | 18 | 26 | 229 | 185 | 195 | 91  | 127 | 109 |
| SMMPA02986 | 15 | 13 | 10 | 50  | 43  | 36  | 30  | 44  | 38  |
| SMMPA02987 | 17 | 19 | 21 | 150 | 162 | 151 | 65  | 106 | 99  |
| SMMPA02988 | 14 | 13 | 9  | 162 | 155 | 112 | 84  | 83  | 71  |
| SMMPA02989 | 18 | 17 | 17 | 71  | 59  | 44  | 42  | 49  | 49  |
| SMMPA02990 | 12 | 11 | 4  | 57  | 42  | 45  | 21  | 28  | 23  |
| SMMPA02991 | 24 | 20 | 21 | 314 | 310 | 263 | 165 | 218 | 225 |
| SMMPA02992 | 9  | 8  | 10 | 24  | 12  | 16  | 22  | 17  | 27  |
| SMMPA02993 | 21 | 18 | 14 | 244 | 273 | 248 | 126 | 140 | 150 |
| SMMPA02994 | 27 | 34 | 32 | 670 | 629 | 538 | 393 | 507 | 460 |
| SMMPA02995 | 20 | 22 | 17 | 382 | 377 | 310 | 361 | 484 | 492 |
| SMMPA02996 | 10 | 20 | 18 | 122 | 107 | 72  | 53  | 67  | 57  |

|            |    |    |    |     |     |     |     |     |     |
|------------|----|----|----|-----|-----|-----|-----|-----|-----|
| SMMPA02997 | 28 | 18 | 16 | 74  | 72  | 54  | 41  | 41  | 50  |
| SMMPA02998 | 35 | 27 | 33 | 91  | 80  | 50  | 41  | 80  | 52  |
| SMMPA02999 | 18 | 27 | 28 | 91  | 85  | 58  | 44  | 69  | 75  |
| SMMPA03000 | 15 | 17 | 17 | 85  | 87  | 57  | 32  | 40  | 40  |
| SMMPA03001 | 20 | 22 | 20 | 31  | 33  | 30  | 30  | 27  | 38  |
| SMMPA03002 | 21 | 19 | 15 | 41  | 50  | 23  | 30  | 34  | 36  |
| SMMPA03003 | 43 | 39 | 40 | 77  | 70  | 78  | 56  | 70  | 67  |
| SMMPA03004 | 18 | 17 | 15 | 54  | 50  | 43  | 20  | 35  | 29  |
| SMMPA03005 | 23 | 10 | 15 | 61  | 56  | 39  | 36  | 32  | 35  |
| SMMPA03006 | 19 | 21 | 14 | 12  | 23  | 18  | 21  | 25  | 21  |
| SMMPA03007 | 16 | 26 | 29 | 132 | 122 | 89  | 62  | 84  | 72  |
| SMMPA03008 | 16 | 14 | 16 | 69  | 81  | 68  | 26  | 50  | 30  |
| SMMPA03009 | 37 | 32 | 21 | 121 | 107 | 74  | 53  | 81  | 85  |
| SMMPA03010 | 28 | 29 | 23 | 64  | 64  | 35  | 67  | 83  | 65  |
| SMMPA03011 | 14 | 16 | 17 | 74  | 59  | 51  | 33  | 54  | 46  |
| SMMPA03012 | 14 | 11 | 8  | 57  | 40  | 37  | 29  | 37  | 35  |
| SMMPA03013 | 9  | 16 | 13 | 15  | 11  | 16  | 12  | 14  | 17  |
| SMMPA03014 | 8  | 13 | 9  | 25  | 17  | 12  | 17  | 21  | 21  |
| SMMPA03015 | 6  | 3  | 6  | 11  | 11  | 6   | 5   | 6   | 14  |
| SMMPA03016 | 20 | 18 | 12 | 43  | 33  | 30  | 42  | 38  | 44  |
| SMMPA03017 | 5  | 14 | 7  | 24  | 23  | 19  | 7   | 15  | 14  |
| SMMPA03018 | 29 | 28 | 14 | 39  | 46  | 40  | 28  | 31  | 53  |
| SMMPA03019 | 15 | 19 | 15 | 35  | 25  | 29  | 24  | 30  | 26  |
| SMMPA03020 | 20 | 12 | 27 | 42  | 23  | 20  | 29  | 32  | 17  |
| SMMPA03021 | 9  | 15 | 8  | 19  | 11  | 14  | 8   | 12  | 12  |
| SMMPA03022 | 12 | 28 | 17 | 38  | 28  | 17  | 24  | 32  | 36  |
| SMMPA03023 | 28 | 25 | 38 | 133 | 107 | 77  | 78  | 116 | 107 |
| SMMPA03024 | 19 | 17 | 19 | 42  | 39  | 30  | 38  | 54  | 50  |
| SMMPA03025 | 16 | 32 | 16 | 27  | 34  | 37  | 38  | 35  | 48  |
| SMMPA03026 | 2  | 0  | 1  | 15  | 12  | 6   | 9   | 11  | 0   |
| SMMPA03027 | 23 | 24 | 18 | 25  | 21  | 19  | 21  | 34  | 34  |
| SMMPA03028 | 37 | 32 | 31 | 118 | 103 | 67  | 42  | 72  | 72  |
| SMMPA03029 | 22 | 21 | 19 | 111 | 85  | 71  | 50  | 58  | 79  |
| SMMPA03030 | 27 | 34 | 25 | 163 | 126 | 116 | 59  | 97  | 76  |
| SMMPA03031 | 26 | 28 | 29 | 481 | 412 | 381 | 196 | 249 | 213 |
| SMMPA03032 | 26 | 32 | 24 | 68  | 76  | 49  | 42  | 56  | 46  |
| SMMPA03033 | 25 | 28 | 26 | 69  | 66  | 41  | 36  | 58  | 44  |
| SMMPA03034 | 30 | 18 | 17 | 44  | 42  | 41  | 33  | 31  | 31  |
| SMMPA03035 | 21 | 24 | 16 | 12  | 11  | 10  | 25  | 30  | 17  |
| SMMPA03036 | 56 | 57 | 47 | 51  | 50  | 49  | 65  | 78  | 73  |
| SMMPA03037 | 35 | 40 | 34 | 100 | 89  | 65  | 49  | 82  | 70  |

|            |    |    |    |     |     |     |     |     |     |
|------------|----|----|----|-----|-----|-----|-----|-----|-----|
| SMMPA03038 | 29 | 33 | 22 | 44  | 57  | 37  | 28  | 45  | 42  |
| SMMPA03039 | 36 | 38 | 43 | 58  | 45  | 45  | 58  | 84  | 58  |
| SMMPA03040 | 17 | 24 | 15 | 17  | 31  | 22  | 21  | 31  | 35  |
| SMMPA03041 | 31 | 37 | 36 | 154 | 164 | 92  | 86  | 108 | 95  |
| SMMPA03042 | 94 | 99 | 80 | 137 | 152 | 111 | 92  | 131 | 133 |
| SMMPA03043 | 5  | 12 | 8  | 9   | 12  | 10  | 9   | 11  | 15  |
| SMMPA03044 | 3  | 2  | 0  | 3   | 3   | 3   | 0   | 3   | 0   |
| SMMPA03045 | 32 | 26 | 13 | 83  | 85  | 69  | 43  | 55  | 51  |
| SMMPA03046 | 16 | 9  | 17 | 218 | 172 | 164 | 64  | 102 | 93  |
| SMMPA03047 | 14 | 14 | 8  | 3   | 9   | 5   | 12  | 19  | 15  |
| SMMPA03048 | 9  | 14 | 10 | 27  | 27  | 24  | 21  | 23  | 22  |
| SMMPA03049 | 16 | 12 | 18 | 39  | 21  | 33  | 21  | 23  | 23  |
| SMMPA03050 | 13 | 9  | 8  | 17  | 19  | 13  | 15  | 24  | 13  |
| SMMPA03051 | 7  | 3  | 8  | 12  | 11  | 13  | 10  | 12  | 9   |
| SMMPA03052 | 10 | 19 | 16 | 194 | 184 | 146 | 76  | 81  | 78  |
| SMMPA03053 | 32 | 59 | 36 | 128 | 126 | 90  | 77  | 121 | 108 |
| SMMPA03054 | 18 | 17 | 11 | 74  | 48  | 62  | 40  | 56  | 48  |
| SMMPA03055 | 25 | 22 | 11 | 37  | 27  | 20  | 24  | 27  | 39  |
| SMMPA03056 | 16 | 24 | 15 | 21  | 18  | 13  | 30  | 29  | 32  |
| SMMPA03057 | 16 | 26 | 22 | 255 | 241 | 203 | 133 | 202 | 170 |
| SMMPA03058 | 20 | 16 | 15 | 160 | 149 | 114 | 72  | 105 | 86  |
| SMMPA03059 | 15 | 9  | 12 | 305 | 287 | 226 | 100 | 168 | 165 |
| SMMPA03060 | 7  | 24 | 15 | 137 | 109 | 106 | 49  | 59  | 58  |
| SMMPA03061 | 16 | 20 | 14 | 106 | 95  | 84  | 39  | 50  | 49  |
| SMMPA03062 | 14 | 11 | 8  | 26  | 23  | 17  | 13  | 20  | 27  |
| SMMPA03063 | 16 | 24 | 15 | 40  | 39  | 35  | 26  | 30  | 21  |
| SMMPA03064 | 4  | 6  | 5  | 21  | 23  | 17  | 12  | 9   | 13  |
| SMMPA03065 | 29 | 14 | 18 | 676 | 669 | 747 | 265 | 366 | 314 |
| SMMPA03066 | 20 | 12 | 22 | 27  | 24  | 19  | 25  | 19  | 32  |
| SMMPA03067 | 18 | 12 | 19 | 240 | 235 | 182 | 123 | 161 | 166 |
| SMMPA03068 | 16 | 16 | 18 | 155 | 133 | 80  | 66  | 64  | 77  |
| SMMPA03069 | 25 | 40 | 38 | 330 | 276 | 241 | 109 | 139 | 134 |
| SMMPA03070 | 32 | 23 | 26 | 482 | 473 | 412 | 195 | 297 | 224 |
| SMMPA03071 | 26 | 27 | 24 | 488 | 502 | 360 | 199 | 261 | 218 |
| SMMPA03072 | 13 | 22 | 27 | 385 | 371 | 299 | 147 | 207 | 197 |
| SMMPA03073 | 28 | 16 | 10 | 175 | 148 | 114 | 64  | 89  | 78  |
| SMMPA03074 | 18 | 13 | 10 | 22  | 25  | 23  | 17  | 25  | 23  |
| SMMPA03075 | 13 | 16 | 11 | 85  | 64  | 44  | 53  | 63  | 53  |
| SMMPA03076 | 18 | 28 | 19 | 39  | 25  | 29  | 21  | 22  | 26  |
| SMMPA03077 | 21 | 24 | 25 | 75  | 52  | 53  | 50  | 61  | 56  |
| SMMPA03078 | 13 | 20 | 15 | 55  | 45  | 44  | 20  | 39  | 34  |

|            |    |    |    |     |     |     |     |     |     |
|------------|----|----|----|-----|-----|-----|-----|-----|-----|
| SMMPA03079 | 13 | 12 | 10 | 28  | 29  | 28  | 17  | 20  | 16  |
| SMMPA03080 | 13 | 19 | 16 | 54  | 37  | 28  | 22  | 29  | 37  |
| SMMPA03081 | 25 | 30 | 30 | 49  | 43  | 48  | 31  | 36  | 40  |
| SMMPA03082 | 12 | 16 | 11 | 19  | 23  | 15  | 10  | 24  | 16  |
| SMMPA03083 | 20 | 20 | 13 | 32  | 34  | 45  | 29  | 30  | 36  |
| SMMPA03084 | 15 | 13 | 11 | 31  | 23  | 15  | 15  | 22  | 19  |
| SMMPA03085 | 20 | 15 | 13 | 31  | 46  | 28  | 28  | 44  | 27  |
| SMMPA03086 | 21 | 26 | 25 | 48  | 36  | 38  | 46  | 35  | 36  |
| SMMPA03087 | 25 | 35 | 25 | 34  | 29  | 29  | 34  | 41  | 33  |
| SMMPA03088 | 13 | 13 | 16 | 30  | 24  | 26  | 19  | 26  | 28  |
| SMMPA03089 | 19 | 15 | 13 | 169 | 203 | 150 | 75  | 99  | 73  |
| SMMPA03090 | 14 | 13 | 11 | 96  | 96  | 57  | 29  | 46  | 36  |
| SMMPA03091 | 16 | 24 | 24 | 873 | 847 | 779 | 409 | 588 | 493 |
| SMMPA03092 | 13 | 10 | 18 | 173 | 134 | 104 | 65  | 62  | 93  |
| SMMPA03093 | 15 | 17 | 14 | 79  | 73  | 55  | 38  | 44  | 37  |
| SMMPA03094 | 15 | 27 | 18 | 150 | 121 | 87  | 61  | 81  | 77  |
| SMMPA03095 | 12 | 19 | 21 | 393 | 390 | 372 | 166 | 255 | 210 |
| SMMPA03096 | 35 | 35 | 26 | 382 | 334 | 235 | 166 | 213 | 202 |
| SMMPA03097 | 50 | 46 | 36 | 94  | 81  | 80  | 61  | 85  | 97  |
| SMMPA03098 | 11 | 21 | 13 | 305 | 309 | 271 | 110 | 143 | 118 |
| SMMPA03099 | 9  | 11 | 7  | 8   | 11  | 11  | 19  | 18  | 13  |
| SMMPA03100 | 16 | 11 | 13 | 15  | 25  | 20  | 17  | 31  | 40  |
| SMMPA03101 | 16 | 21 | 18 | 28  | 28  | 21  | 21  | 24  | 28  |
| SMMPA03102 | 6  | 9  | 8  | 10  | 15  | 13  | 10  | 16  | 24  |
| SMMPA03103 | 14 | 19 | 9  | 11  | 18  | 10  | 11  | 13  | 17  |
| SMMPA03104 | 10 | 11 | 11 | 28  | 20  | 15  | 13  | 20  | 21  |
| SMMPA03105 | 18 | 18 | 11 | 22  | 18  | 20  | 17  | 18  | 22  |
| SMMPA03106 | 15 | 15 | 7  | 28  | 35  | 28  | 26  | 35  | 21  |
| SMMPA03107 | 33 | 33 | 19 | 412 | 407 | 345 | 183 | 253 | 218 |
| SMMPA03108 | 18 | 14 | 13 | 32  | 35  | 14  | 23  | 28  | 23  |
| SMMPA03109 | 22 | 25 | 21 | 10  | 15  | 13  | 13  | 25  | 25  |
| SMMPA03110 | 21 | 16 | 19 | 26  | 17  | 9   | 28  | 29  | 31  |
| SMMPA03111 | 35 | 28 | 28 | 135 | 131 | 88  | 54  | 71  | 73  |
| SMMPA03112 | 83 | 85 | 72 | 52  | 55  | 45  | 84  | 96  | 104 |
| SMMPA03113 | 27 | 22 | 23 | 51  | 57  | 32  | 31  | 36  | 36  |
| SMMPA03114 | 30 | 43 | 21 | 61  | 43  | 49  | 48  | 48  | 69  |
| SMMPA03115 | 34 | 19 | 20 | 87  | 66  | 64  | 68  | 108 | 89  |
| SMMPA03116 | 43 | 53 | 34 | 57  | 72  | 52  | 36  | 55  | 45  |
| SMMPA03117 | 33 | 26 | 30 | 61  | 63  | 35  | 42  | 70  | 48  |
| SMMPA03118 | 43 | 31 | 32 | 64  | 40  | 56  | 44  | 58  | 54  |
| SMMPA03119 | 11 | 21 | 14 | 44  | 49  | 35  | 35  | 23  | 30  |

|            |    |    |    |     |     |     |     |     |     |
|------------|----|----|----|-----|-----|-----|-----|-----|-----|
| SMMPA03120 | 31 | 34 | 23 | 83  | 92  | 104 | 60  | 74  | 64  |
| SMMPA03121 | 31 | 27 | 19 | 68  | 84  | 51  | 45  | 66  | 59  |
| SMMPA03122 | 19 | 18 | 15 | 36  | 33  | 38  | 34  | 50  | 47  |
| SMMPA03123 | 13 | 20 | 18 | 79  | 72  | 75  | 39  | 59  | 59  |
| SMMPA03124 | 25 | 17 | 26 | 38  | 29  | 34  | 30  | 30  | 42  |
| SMMPA03125 | 3  | 5  | 4  | 15  | 14  | 16  | 12  | 13  | 8   |
| SMMPA03126 | 19 | 29 | 17 | 84  | 79  | 64  | 35  | 58  | 45  |
| SMMPA03127 | 22 | 26 | 16 | 128 | 115 | 89  | 65  | 81  | 76  |
| SMMPA03128 | 23 | 19 | 10 | 61  | 66  | 38  | 48  | 50  | 47  |
| SMMPA03129 | 15 | 14 | 20 | 57  | 52  | 44  | 27  | 44  | 32  |
| SMMPA03130 | 24 | 23 | 14 | 123 | 112 | 75  | 61  | 80  | 72  |
| SMMPA03131 | 53 | 47 | 63 | 225 | 245 | 185 | 134 | 176 | 174 |
| SMMPA03132 | 30 | 29 | 27 | 124 | 106 | 82  | 80  | 117 | 95  |
| SMMPA03133 | 22 | 22 | 30 | 152 | 132 | 107 | 72  | 104 | 91  |
| SMMPA03134 | 7  | 14 | 17 | 8   | 9   | 12  | 11  | 22  | 5   |
| SMMPA03135 | 10 | 12 | 10 | 14  | 15  | 15  | 10  | 16  | 9   |
| SMMPA03136 | 26 | 25 | 20 | 30  | 40  | 33  | 12  | 25  | 29  |
| SMMPA03137 | 29 | 44 | 32 | 21  | 17  | 17  | 19  | 34  | 38  |
| SMMPA03138 | 15 | 15 | 13 | 5   | 7   | 9   | 15  | 23  | 19  |
| SMMPA03139 | 36 | 30 | 22 | 16  | 21  | 29  | 20  | 24  | 26  |
| SMMPA03140 | 45 | 50 | 45 | 34  | 28  | 23  | 48  | 53  | 39  |
| SMMPA03141 | 51 | 51 | 52 | 55  | 44  | 32  | 50  | 74  | 79  |
| SMMPA03142 | 20 | 13 | 19 | 15  | 17  | 17  | 13  | 23  | 19  |
| SMMPA03143 | 16 | 16 | 10 | 42  | 36  | 24  | 43  | 53  | 46  |
| SMMPA03144 | 24 | 22 | 18 | 19  | 18  | 16  | 21  | 25  | 21  |
| SMMPA03145 | 8  | 6  | 14 | 18  | 17  | 17  | 18  | 26  | 22  |
| SMMPA03146 | 14 | 21 | 11 | 30  | 31  | 21  | 29  | 35  | 39  |
| SMMPA03147 | 28 | 34 | 20 | 121 | 117 | 73  | 84  | 90  | 71  |
| SMMPA03148 | 21 | 16 | 17 | 47  | 36  | 31  | 32  | 39  | 27  |
| SMMPA03149 | 23 | 26 | 23 | 71  | 59  | 40  | 48  | 56  | 57  |
| SMMPA03150 | 16 | 15 | 19 | 33  | 36  | 23  | 23  | 30  | 31  |
| SMMPA03151 | 14 | 13 | 19 | 23  | 21  | 21  | 23  | 27  | 39  |
| SMMPA03152 | 27 | 32 | 27 | 841 | 828 | 726 | 376 | 473 | 437 |
| SMMPA03153 | 12 | 12 | 15 | 180 | 172 | 145 | 82  | 145 | 118 |
| SMMPA03154 | 20 | 11 | 13 | 267 | 288 | 203 | 129 | 175 | 201 |
| SMMPA03155 | 14 | 23 | 14 | 12  | 19  | 21  | 14  | 21  | 23  |
| SMMPA03156 | 5  | 6  | 3  | 6   | 5   | 2   | 5   | 6   | 8   |
| SMMPA03157 | 8  | 9  | 6  | 7   | 12  | 12  | 5   | 14  | 9   |
| SMMPA03158 | 19 | 9  | 17 | 78  | 54  | 54  | 44  | 52  | 48  |
| SMMPA03159 | 15 | 23 | 13 | 19  | 13  | 23  | 22  | 18  | 25  |
| SMMPA03160 | 9  | 12 | 11 | 19  | 13  | 16  | 14  | 29  | 29  |

|            |    |    |    |     |     |     |     |     |     |
|------------|----|----|----|-----|-----|-----|-----|-----|-----|
| SMMPA03161 | 16 | 17 | 21 | 110 | 90  | 71  | 36  | 39  | 49  |
| SMMPA03162 | 21 | 20 | 14 | 32  | 44  | 27  | 22  | 26  | 31  |
| SMMPA03163 | 11 | 11 | 7  | 20  | 19  | 13  | 11  | 17  | 9   |
| SMMPA03164 | 15 | 25 | 25 | 47  | 40  | 37  | 26  | 33  | 30  |
| SMMPA03165 | 7  | 9  | 3  | 11  | 13  | 8   | 6   | 14  | 4   |
| SMMPA03166 | 17 | 15 | 17 | 47  | 42  | 34  | 28  | 39  | 28  |
| SMMPA03167 | 4  | 3  | 8  | 51  | 48  | 37  | 29  | 36  | 30  |
| SMMPA03168 | 13 | 20 | 9  | 133 | 102 | 88  | 70  | 65  | 73  |
| SMMPA03169 | 80 | 78 | 66 | 111 | 88  | 79  | 86  | 124 | 101 |
| SMMPA03170 | 20 | 21 | 22 | 32  | 32  | 26  | 27  | 37  | 44  |
| SMMPA03171 | 9  | 14 | 11 | 28  | 24  | 20  | 11  | 19  | 29  |
| SMMPA03172 | 20 | 17 | 21 | 37  | 25  | 32  | 34  | 30  | 38  |
| SMMPA03173 | 14 | 21 | 15 | 13  | 9   | 13  | 14  | 31  | 38  |
| SMMPA03174 | 13 | 13 | 17 | 186 | 158 | 126 | 86  | 134 | 108 |
| SMMPA03175 | 22 | 20 | 12 | 23  | 30  | 26  | 17  | 25  | 20  |
| SMMPA03176 | 17 | 17 | 15 | 25  | 22  | 16  | 17  | 26  | 21  |
| SMMPA03177 | 13 | 13 | 10 | 10  | 10  | 18  | 16  | 27  | 16  |
| SMMPA03178 | 16 | 28 | 23 | 70  | 69  | 56  | 38  | 53  | 39  |
| SMMPA03179 | 13 | 16 | 22 | 48  | 42  | 41  | 21  | 33  | 25  |
| SMMPA03180 | 21 | 25 | 22 | 73  | 60  | 60  | 39  | 46  | 32  |
| SMMPA03181 | 6  | 6  | 1  | 15  | 15  | 4   | 7   | 8   | 10  |
| SMMPA03182 | 24 | 30 | 22 | 85  | 85  | 80  | 45  | 63  | 88  |
| SMMPA03183 | 33 | 26 | 22 | 56  | 57  | 39  | 40  | 44  | 47  |
| SMMPA03184 | 25 | 37 | 33 | 126 | 101 | 88  | 63  | 67  | 52  |
| SMMPA03185 | 23 | 25 | 15 | 27  | 24  | 22  | 29  | 31  | 26  |
| SMMPA03186 | 16 | 22 | 10 | 65  | 71  | 46  | 40  | 43  | 50  |
| SMMPA03187 | 6  | 7  | 3  | 33  | 28  | 26  | 12  | 16  | 10  |
| SMMPA03188 | 11 | 9  | 11 | 55  | 66  | 53  | 25  | 24  | 25  |
| SMMPA03189 | 17 | 11 | 10 | 38  | 33  | 37  | 17  | 24  | 24  |
| SMMPA03190 | 7  | 6  | 5  | 23  | 11  | 11  | 8   | 5   | 5   |
| SMMPA03191 | 14 | 19 | 6  | 300 | 286 | 234 | 87  | 115 | 114 |
| SMMPA03192 | 8  | 7  | 8  | 22  | 36  | 25  | 11  | 23  | 14  |
| SMMPA03193 | 32 | 20 | 24 | 126 | 118 | 104 | 69  | 82  | 58  |
| SMMPA03194 | 23 | 16 | 17 | 78  | 61  | 38  | 23  | 29  | 32  |
| SMMPA03195 | 24 | 21 | 27 | 264 | 216 | 214 | 114 | 133 | 111 |
| SMMPA03196 | 11 | 19 | 17 | 44  | 37  | 42  | 19  | 29  | 35  |
| SMMPA03197 | 11 | 11 | 14 | 71  | 59  | 37  | 22  | 42  | 41  |
| SMMPA03198 | 24 | 20 | 13 | 229 | 201 | 152 | 80  | 110 | 120 |
| SMMPA03199 | 13 | 15 | 15 | 111 | 96  | 83  | 63  | 70  | 70  |
| SMMPA03200 | 8  | 14 | 7  | 90  | 109 | 79  | 53  | 71  | 74  |
| SMMPA03201 | 24 | 11 | 11 | 22  | 23  | 23  | 15  | 18  | 26  |

|            |    |    |    |     |     |     |     |     |     |
|------------|----|----|----|-----|-----|-----|-----|-----|-----|
| SMMPA03202 | 7  | 12 | 16 | 39  | 32  | 32  | 15  | 14  | 13  |
| SMMPA03203 | 6  | 7  | 2  | 26  | 36  | 22  | 13  | 15  | 24  |
| SMMPA03204 | 12 | 21 | 12 | 68  | 49  | 49  | 51  | 70  | 62  |
| SMMPA03205 | 18 | 21 | 18 | 55  | 38  | 27  | 39  | 49  | 48  |
| SMMPA03206 | 5  | 7  | 2  | 14  | 12  | 16  | 10  | 14  | 17  |
| SMMPA03207 | 17 | 11 | 7  | 33  | 27  | 23  | 19  | 30  | 24  |
| SMMPA03208 | 9  | 15 | 9  | 81  | 89  | 66  | 52  | 75  | 68  |
| SMMPA03209 | 13 | 19 | 10 | 63  | 64  | 67  | 18  | 27  | 20  |
| SMMPA03210 | 29 | 29 | 30 | 119 | 126 | 95  | 57  | 82  | 80  |
| SMMPA03211 | 21 | 19 | 12 | 60  | 52  | 56  | 46  | 46  | 56  |
| SMMPA03212 | 10 | 11 | 15 | 43  | 30  | 23  | 16  | 27  | 33  |
| SMMPA03213 | 15 | 12 | 15 | 24  | 34  | 30  | 12  | 26  | 11  |
| SMMPA03214 | 15 | 21 | 15 | 170 | 167 | 137 | 127 | 142 | 136 |
| SMMPA03215 | 16 | 20 | 13 | 71  | 55  | 45  | 48  | 57  | 69  |
| SMMPA03216 | 40 | 32 | 18 | 243 | 220 | 163 | 142 | 198 | 171 |
| SMMPA03217 | 42 | 39 | 33 | 269 | 198 | 156 | 155 | 215 | 214 |
| SMMPA03218 | 39 | 28 | 29 | 77  | 64  | 53  | 71  | 106 | 81  |
| SMMPA03219 | 26 | 23 | 20 | 104 | 112 | 72  | 75  | 140 | 114 |
| SMMPA03220 | 20 | 18 | 19 | 52  | 45  | 40  | 44  | 49  | 61  |
| SMMPA03221 | 31 | 23 | 20 | 47  | 55  | 35  | 40  | 49  | 46  |
| SMMPA03222 | 11 | 11 | 11 | 20  | 17  | 20  | 24  | 18  | 23  |
| SMMPA03223 | 23 | 34 | 25 | 120 | 120 | 120 | 121 | 176 | 172 |
| SMMPA03224 | 27 | 29 | 36 | 31  | 34  | 30  | 25  | 55  | 37  |
| SMMPA03225 | 21 | 13 | 29 | 32  | 25  | 34  | 22  | 25  | 29  |
| SMMPA03226 | 11 | 10 | 10 | 16  | 10  | 14  | 15  | 19  | 22  |
| SMMPA03227 | 4  | 13 | 4  | 14  | 12  | 6   | 22  | 17  | 25  |
| SMMPA03228 | 20 | 24 | 17 | 39  | 42  | 24  | 37  | 52  | 44  |
| SMMPA03229 | 17 | 16 | 18 | 49  | 45  | 26  | 33  | 41  | 53  |
| SMMPA03230 | 8  | 12 | 19 | 44  | 34  | 24  | 23  | 30  | 41  |
| SMMPA03231 | 12 | 11 | 8  | 27  | 28  | 16  | 18  | 36  | 29  |
| SMMPA03232 | 10 | 13 | 15 | 71  | 60  | 39  | 57  | 52  | 60  |
| SMMPA03233 | 18 | 21 | 17 | 91  | 86  | 67  | 43  | 84  | 54  |
| SMMPA03234 | 15 | 19 | 21 | 83  | 69  | 62  | 55  | 64  | 50  |
| SMMPA03235 | 19 | 16 | 22 | 18  | 15  | 19  | 32  | 27  | 34  |
| SMMPA03236 | 23 | 20 | 17 | 24  | 27  | 20  | 24  | 34  | 50  |
| SMMPA03237 | 5  | 8  | 5  | 5   | 13  | 8   | 15  | 22  | 15  |
| SMMPA03238 | 11 | 14 | 5  | 104 | 92  | 72  | 36  | 67  | 75  |
| SMMPA03239 | 20 | 18 | 13 | 23  | 17  | 17  | 20  | 21  | 35  |
| SMMPA03240 | 47 | 40 | 31 | 210 | 192 | 149 | 55  | 83  | 71  |
| SMMPA03241 | 92 | 99 | 67 | 613 | 573 | 482 | 295 | 392 | 304 |
| SMMPA03242 | 35 | 38 | 41 | 63  | 82  | 64  | 41  | 46  | 48  |



|            |    |    |    |     |     |     |     |     |     |
|------------|----|----|----|-----|-----|-----|-----|-----|-----|
| SMMPA03243 | 46 | 51 | 25 | 72  | 76  | 72  | 51  | 56  | 58  |
| SMMPA03244 | 11 | 6  | 9  | 35  | 50  | 38  | 12  | 10  | 16  |
| SMMPA03245 | 31 | 30 | 30 | 180 | 172 | 126 | 83  | 114 | 137 |
| SMMPA03246 | 39 | 41 | 27 | 137 | 115 | 92  | 45  | 71  | 75  |
| SMMPA03247 | 9  | 6  | 11 | 17  | 27  | 31  | 11  | 16  | 13  |
| SMMPA03248 | 12 | 18 | 6  | 40  | 40  | 43  | 15  | 25  | 11  |
| SMMPA03249 | 18 | 15 | 15 | 10  | 18  | 24  | 53  | 56  | 57  |
| SMMPA03250 | 26 | 40 | 27 | 30  | 40  | 28  | 49  | 63  | 62  |
| SMMPA03251 | 64 | 70 | 59 | 37  | 33  | 30  | 36  | 71  | 62  |
| SMMPA03252 | 14 | 20 | 18 | 38  | 36  | 17  | 20  | 29  | 38  |
| SMMPA03253 | 17 | 19 | 16 | 56  | 48  | 40  | 22  | 38  | 41  |
| SMMPA03254 | 28 | 32 | 21 | 94  | 98  | 75  | 53  | 75  | 77  |
| SMMPA03255 | 29 | 27 | 20 | 35  | 39  | 23  | 30  | 41  | 49  |
| SMMPA03256 | 5  | 3  | 3  | 5   | 3   | 7   | 9   | 16  | 8   |
| SMMPA03257 | 33 | 29 | 27 | 100 | 107 | 91  | 59  | 72  | 66  |
| SMMPA03258 | 18 | 24 | 21 | 43  | 32  | 30  | 39  | 36  | 38  |
| SMMPA03259 | 10 | 22 | 16 | 61  | 64  | 49  | 33  | 67  | 53  |
| SMMPA03260 | 18 | 18 | 18 | 36  | 34  | 39  | 32  | 43  | 45  |
| SMMPA03261 | 23 | 27 | 23 | 254 | 250 | 181 | 168 | 190 | 201 |
| SMMPA03262 | 15 | 10 | 10 | 45  | 33  | 30  | 34  | 49  | 40  |
| SMMPA03263 | 10 | 21 | 14 | 54  | 61  | 45  | 33  | 52  | 46  |
| SMMPA03264 | 37 | 28 | 30 | 63  | 74  | 42  | 66  | 85  | 82  |
| SMMPA03265 | 14 | 14 | 19 | 74  | 50  | 45  | 57  | 46  | 53  |
| SMMPA03266 | 25 | 18 | 12 | 106 | 104 | 81  | 57  | 77  | 67  |
| SMMPA03267 | 18 | 19 | 18 | 124 | 97  | 73  | 105 | 98  | 130 |
| SMMPA03268 | 17 | 29 | 18 | 92  | 76  | 62  | 57  | 94  | 73  |
| SMMPA03269 | 14 | 15 | 9  | 80  | 67  | 40  | 43  | 51  | 54  |
| SMMPA03270 | 11 | 27 | 21 | 169 | 162 | 144 | 114 | 131 | 133 |
| SMMPA03271 | 18 | 14 | 11 | 84  | 80  | 72  | 59  | 70  | 63  |
| SMMPA03272 | 12 | 17 | 7  | 29  | 36  | 35  | 34  | 41  | 25  |
| SMMPA03273 | 29 | 38 | 21 | 56  | 51  | 41  | 57  | 53  | 65  |
| SMMPA03274 | 9  | 13 | 16 | 79  | 79  | 49  | 42  | 53  | 55  |
| SMMPA03275 | 5  | 5  | 5  | 9   | 25  | 16  | 14  | 21  | 17  |
| SMMPA03276 | 2  | 12 | 9  | 11  | 17  | 12  | 18  | 17  | 25  |
| SMMPA03277 | 28 | 24 | 28 | 120 | 132 | 74  | 67  | 115 | 116 |
| SMMPA03278 | 15 | 13 | 20 | 40  | 25  | 25  | 25  | 34  | 36  |
| SMMPA03279 | 3  | 4  | 3  | 8   | 6   | 4   | 12  | 14  | 11  |
| SMMPA03280 | 31 | 46 | 35 | 129 | 102 | 88  | 91  | 113 | 118 |
| SMMPA03281 | 27 | 16 | 21 | 101 | 87  | 77  | 40  | 59  | 53  |
| SMMPA03282 | 7  | 4  | 7  | 11  | 11  | 15  | 12  | 24  | 12  |
| SMMPA03283 | 0  | 4  | 1  | 6   | 13  | 13  | 11  | 9   | 9   |

|            |     |     |     |     |     |     |     |     |     |
|------------|-----|-----|-----|-----|-----|-----|-----|-----|-----|
| SMMPA03284 | 16  | 11  | 20  | 22  | 29  | 34  | 25  | 26  | 31  |
| SMMPA03285 | 120 | 168 | 126 | 68  | 71  | 81  | 78  | 125 | 139 |
| SMMPA03286 | 123 | 128 | 99  | 41  | 58  | 58  | 84  | 95  | 97  |
| SMMPA03287 | 52  | 59  | 64  | 27  | 25  | 31  | 48  | 48  | 48  |
| SMMPA03288 | 103 | 82  | 77  | 28  | 28  | 33  | 56  | 57  | 51  |
| SMMPA03289 | 105 | 115 | 77  | 31  | 28  | 53  | 53  | 73  | 93  |
| SMMPA03290 | 109 | 101 | 86  | 70  | 45  | 62  | 63  | 81  | 83  |
| SMMPA03291 | 111 | 127 | 76  | 43  | 45  | 51  | 90  | 96  | 110 |
| SMMPA03292 | 105 | 91  | 78  | 50  | 35  | 58  | 68  | 89  | 78  |
| SMMPA03293 | 261 | 274 | 232 | 114 | 110 | 130 | 139 | 188 | 163 |
| SMMPA03294 | 11  | 6   | 8   | 4   | 3   | 3   | 9   | 14  | 15  |
| SMMPA03295 | 280 | 284 | 247 | 90  | 116 | 122 | 183 | 211 | 213 |
| SMMPA03296 | 9   | 11  | 8   | 34  | 25  | 24  | 21  | 12  | 25  |
| SMMPA03297 | 21  | 14  | 11  | 25  | 16  | 27  | 13  | 26  | 29  |
| SMMPA03298 | 21  | 14  | 14  | 48  | 58  | 44  | 40  | 55  | 52  |
| SMMPA03299 | 10  | 6   | 4   | 12  | 20  | 7   | 15  | 31  | 25  |
| SMMPA03300 | 23  | 20  | 22  | 73  | 59  | 50  | 28  | 38  | 55  |
| SMMPA03301 | 29  | 23  | 18  | 89  | 81  | 80  | 52  | 60  | 48  |
| SMMPA03302 | 8   | 7   | 8   | 59  | 49  | 46  | 26  | 36  | 30  |
| SMMPA03303 | 23  | 17  | 15  | 129 | 128 | 105 | 37  | 73  | 48  |
| SMMPA03304 | 31  | 30  | 15  | 69  | 59  | 52  | 35  | 54  | 53  |
| SMMPA03305 | 8   | 10  | 8   | 32  | 30  | 26  | 21  | 28  | 25  |
| SMMPA03306 | 23  | 31  | 20  | 49  | 61  | 42  | 29  | 40  | 41  |
| SMMPA03307 | 26  | 31  | 26  | 32  | 17  | 26  | 28  | 30  | 38  |
| SMMPA03308 | 25  | 34  | 24  | 54  | 29  | 32  | 39  | 35  | 34  |
| SMMPA03309 | 11  | 23  | 10  | 29  | 8   | 19  | 28  | 25  | 33  |
| SMMPA03310 | 26  | 15  | 14  | 27  | 17  | 22  | 22  | 15  | 16  |
| SMMPA03311 | 21  | 15  | 27  | 55  | 44  | 30  | 23  | 55  | 54  |
| SMMPA03312 | 9   | 13  | 10  | 9   | 6   | 4   | 12  | 19  | 13  |
| SMMPA03313 | 9   | 8   | 12  | 16  | 16  | 15  | 7   | 9   | 14  |
| SMMPA03314 | 12  | 7   | 10  | 16  | 20  | 14  | 13  | 13  | 11  |
| SMMPA03315 | 31  | 31  | 30  | 28  | 28  | 27  | 27  | 41  | 43  |
| SMMPA03316 | 15  | 11  | 15  | 40  | 32  | 28  | 13  | 20  | 25  |
| SMMPA03317 | 26  | 25  | 23  | 33  | 46  | 25  | 42  | 61  | 51  |
| SMMPA03318 | 31  | 18  | 25  | 38  | 36  | 29  | 41  | 51  | 47  |
| SMMPA03319 | 44  | 28  | 34  | 127 | 102 | 81  | 69  | 67  | 75  |
| SMMPA03320 | 41  | 52  | 44  | 33  | 40  | 29  | 56  | 51  | 64  |
| SMMPA03321 | 15  | 17  | 15  | 21  | 18  | 27  | 16  | 29  | 28  |
| SMMPA03322 | 17  | 19  | 25  | 50  | 57  | 50  | 30  | 44  | 35  |
| SMMPA03323 | 22  | 21  | 14  | 41  | 25  | 32  | 46  | 53  | 48  |
| SMMPA03324 | 8   | 8   | 6   | 8   | 17  | 8   | 7   | 14  | 18  |

|            |    |     |    |     |     |     |     |     |     |
|------------|----|-----|----|-----|-----|-----|-----|-----|-----|
| SMMPA03325 | 41 | 33  | 23 | 41  | 28  | 44  | 36  | 37  | 34  |
| SMMPA03326 | 32 | 20  | 23 | 66  | 56  | 47  | 73  | 68  | 79  |
| SMMPA03327 | 15 | 7   | 15 | 17  | 26  | 18  | 27  | 29  | 29  |
| SMMPA03328 | 13 | 3   | 7  | 15  | 14  | 7   | 16  | 15  | 17  |
| SMMPA03329 | 25 | 28  | 25 | 69  | 57  | 52  | 47  | 59  | 76  |
| SMMPA03330 | 12 | 15  | 16 | 14  | 19  | 32  | 32  | 43  | 34  |
| SMMPA03331 | 9  | 10  | 8  | 16  | 12  | 11  | 16  | 24  | 24  |
| SMMPA03332 | 20 | 8   | 17 | 28  | 18  | 14  | 36  | 39  | 30  |
| SMMPA03333 | 10 | 4   | 7  | 4   | 11  | 6   | 22  | 15  | 31  |
| SMMPA03334 | 12 | 9   | 7  | 6   | 16  | 11  | 23  | 21  | 23  |
| SMMPA03335 | 26 | 12  | 30 | 52  | 41  | 45  | 29  | 34  | 43  |
| SMMPA03336 | 12 | 11  | 11 | 9   | 14  | 12  | 11  | 15  | 14  |
| SMMPA03337 | 24 | 21  | 11 | 71  | 57  | 60  | 36  | 51  | 39  |
| SMMPA03338 | 15 | 10  | 14 | 20  | 35  | 28  | 17  | 29  | 21  |
| SMMPA03339 | 12 | 12  | 15 | 23  | 24  | 19  | 21  | 20  | 30  |
| SMMPA03340 | 19 | 16  | 13 | 26  | 27  | 26  | 26  | 26  | 27  |
| SMMPA03341 | 18 | 20  | 23 | 26  | 26  | 20  | 20  | 33  | 35  |
| SMMPA03342 | 33 | 19  | 16 | 36  | 29  | 27  | 22  | 29  | 22  |
| SMMPA03343 | 16 | 10  | 12 | 36  | 44  | 38  | 23  | 44  | 27  |
| SMMPA03344 | 9  | 15  | 13 | 25  | 20  | 26  | 28  | 19  | 33  |
| SMMPA03345 | 81 | 100 | 70 | 66  | 74  | 60  | 61  | 73  | 81  |
| SMMPA03346 | 24 | 7   | 9  | 24  | 14  | 16  | 15  | 19  | 25  |
| SMMPA03347 | 21 | 28  | 26 | 29  | 33  | 41  | 41  | 31  | 48  |
| SMMPA03348 | 24 | 23  | 19 | 28  | 19  | 21  | 18  | 31  | 23  |
| SMMPA03349 | 3  | 10  | 7  | 10  | 9   | 11  | 9   | 20  | 13  |
| SMMPA03350 | 39 | 27  | 33 | 42  | 34  | 34  | 31  | 43  | 45  |
| SMMPA03351 | 30 | 24  | 24 | 38  | 39  | 25  | 23  | 39  | 35  |
| SMMPA03352 | 31 | 34  | 27 | 40  | 39  | 38  | 36  | 67  | 43  |
| SMMPA03353 | 16 | 18  | 22 | 39  | 26  | 21  | 28  | 28  | 24  |
| SMMPA03354 | 90 | 93  | 95 | 55  | 43  | 41  | 95  | 100 | 95  |
| SMMPA03355 | 20 | 19  | 24 | 72  | 67  | 59  | 50  | 68  | 68  |
| SMMPA03356 | 14 | 12  | 18 | 48  | 56  | 40  | 44  | 51  | 43  |
| SMMPA03357 | 18 | 9   | 12 | 97  | 101 | 82  | 28  | 46  | 49  |
| SMMPA03358 | 17 | 25  | 17 | 194 | 199 | 154 | 143 | 182 | 165 |
| SMMPA03359 | 18 | 16  | 17 | 119 | 111 | 97  | 74  | 86  | 94  |
| SMMPA03360 | 2  | 3   | 3  | 48  | 49  | 46  | 17  | 29  | 25  |
| SMMPA03361 | 11 | 11  | 14 | 59  | 58  | 47  | 25  | 30  | 34  |
| SMMPA03362 | 13 | 10  | 9  | 44  | 42  | 34  | 34  | 47  | 28  |
| SMMPA03363 | 22 | 23  | 34 | 44  | 39  | 35  | 27  | 60  | 42  |
| SMMPA03364 | 16 | 22  | 13 | 47  | 65  | 53  | 23  | 36  | 40  |
| SMMPA03365 | 15 | 13  | 7  | 111 | 115 | 79  | 63  | 84  | 81  |

|            |    |    |    |     |     |     |     |     |     |
|------------|----|----|----|-----|-----|-----|-----|-----|-----|
| SMMPA03366 | 13 | 10 | 10 | 34  | 16  | 23  | 27  | 29  | 36  |
| SMMPA03367 | 14 | 13 | 14 | 30  | 21  | 32  | 27  | 25  | 31  |
| SMMPA03368 | 11 | 13 | 12 | 9   | 14  | 9   | 6   | 11  | 13  |
| SMMPA03369 | 9  | 6  | 10 | 12  | 16  | 9   | 13  | 19  | 11  |
| SMMPA03370 | 16 | 17 | 9  | 11  | 13  | 7   | 20  | 23  | 34  |
| SMMPA03371 | 13 | 7  | 3  | 139 | 109 | 87  | 62  | 75  | 68  |
| SMMPA03372 | 3  | 10 | 10 | 18  | 17  | 15  | 1   | 7   | 9   |
| SMMPA03373 | 16 | 18 | 15 | 70  | 79  | 61  | 44  | 51  | 48  |
| SMMPA03374 | 21 | 20 | 12 | 97  | 104 | 84  | 40  | 56  | 41  |
| SMMPA03375 | 24 | 17 | 22 | 56  | 50  | 52  | 33  | 49  | 42  |
| SMMPA03376 | 22 | 29 | 22 | 557 | 496 | 396 | 176 | 241 | 207 |
| SMMPA03377 | 24 | 20 | 16 | 96  | 63  | 54  | 30  | 46  | 29  |
| SMMPA03378 | 3  | 2  | 3  | 24  | 12  | 18  | 6   | 14  | 23  |
| SMMPA03379 | 9  | 8  | 17 | 18  | 21  | 22  | 20  | 18  | 11  |
| SMMPA03380 | 25 | 26 | 18 | 26  | 24  | 12  | 22  | 20  | 35  |
| SMMPA03381 | 52 | 59 | 54 | 65  | 70  | 57  | 60  | 62  | 66  |
| SMMPA03382 | 23 | 21 | 26 | 207 | 199 | 162 | 88  | 121 | 97  |
| SMMPA03383 | 25 | 21 | 28 | 21  | 22  | 14  | 33  | 28  | 32  |
| SMMPA03384 | 22 | 21 | 22 | 46  | 60  | 43  | 25  | 43  | 46  |
| SMMPA03385 | 19 | 18 | 20 | 32  | 30  | 19  | 30  | 37  | 35  |
| SMMPA03386 | 31 | 19 | 32 | 32  | 30  | 28  | 30  | 29  | 45  |
| SMMPA03387 | 31 | 36 | 26 | 236 | 200 | 174 | 102 | 138 | 111 |
| SMMPA03388 | 21 | 16 | 19 | 89  | 101 | 86  | 51  | 70  | 55  |
| SMMPA03389 | 3  | 1  | 3  | 9   | 13  | 7   | 2   | 3   | 4   |
| SMMPA03390 | 16 | 19 | 16 | 37  | 40  | 33  | 19  | 27  | 28  |
| SMMPA03391 | 16 | 10 | 14 | 128 | 131 | 106 | 39  | 37  | 32  |
| SMMPA03392 | 20 | 22 | 15 | 189 | 194 | 121 | 28  | 66  | 44  |
| SMMPA03393 | 14 | 12 | 10 | 68  | 69  | 49  | 26  | 28  | 24  |
| SMMPA03394 | 15 | 11 | 8  | 194 | 181 | 177 | 38  | 57  | 49  |
| SMMPA03395 | 10 | 13 | 17 | 86  | 89  | 49  | 34  | 32  | 42  |
| SMMPA03396 | 10 | 20 | 12 | 99  | 97  | 108 | 29  | 34  | 45  |
| SMMPA03397 | 14 | 16 | 10 | 52  | 40  | 37  | 15  | 32  | 33  |
| SMMPA03398 | 4  | 8  | 4  | 72  | 60  | 58  | 13  | 17  | 18  |
| SMMPA03399 | 18 | 25 | 16 | 87  | 71  | 64  | 25  | 55  | 41  |
| SMMPA03400 | 5  | 9  | 10 | 30  | 20  | 19  | 30  | 20  | 28  |
| SMMPA03401 | 12 | 15 | 12 | 27  | 28  | 28  | 17  | 31  | 27  |
| SMMPA03402 | 4  | 15 | 8  | 31  | 26  | 14  | 17  | 29  | 12  |
| SMMPA03403 | 22 | 21 | 10 | 153 | 136 | 102 | 99  | 113 | 130 |
| SMMPA03404 | 7  | 14 | 14 | 48  | 45  | 37  | 31  | 34  | 36  |
| SMMPA03405 | 17 | 14 | 13 | 68  | 56  | 50  | 38  | 68  | 86  |
| SMMPA03406 | 12 | 8  | 7  | 48  | 45  | 28  | 9   | 29  | 37  |

|            |    |    |    |     |     |     |     |     |     |
|------------|----|----|----|-----|-----|-----|-----|-----|-----|
| SMMPA03407 | 99 | 97 | 87 | 102 | 69  | 57  | 81  | 147 | 125 |
| SMMPA03408 | 5  | 0  | 7  | 7   | 5   | 11  | 5   | 12  | 13  |
| SMMPA03409 | 13 | 12 | 13 | 7   | 17  | 9   | 23  | 22  | 23  |
| SMMPA03410 | 18 | 21 | 25 | 48  | 41  | 35  | 23  | 35  | 38  |
| SMMPA03411 | 22 | 32 | 18 | 101 | 82  | 73  | 38  | 55  | 40  |
| SMMPA03412 | 10 | 20 | 10 | 30  | 32  | 24  | 22  | 27  | 24  |
| SMMPA03413 | 22 | 20 | 16 | 41  | 18  | 34  | 26  | 34  | 22  |
| SMMPA03414 | 10 | 9  | 12 | 13  | 10  | 9   | 15  | 11  | 19  |
| SMMPA03415 | 1  | 0  | 0  | 1   | 0   | 0   | 1   | 1   | 1   |
| SMMPA03416 | 25 | 23 | 14 | 18  | 28  | 19  | 25  | 29  | 30  |
| SMMPA03417 | 11 | 8  | 15 | 19  | 28  | 13  | 24  | 38  | 31  |
| SMMPA03418 | 13 | 16 | 12 | 26  | 33  | 24  | 23  | 31  | 26  |
| SMMPA03419 | 9  | 11 | 12 | 85  | 73  | 52  | 24  | 29  | 34  |
| SMMPA03420 | 17 | 18 | 4  | 43  | 42  | 32  | 29  | 34  | 26  |
| SMMPA03421 | 16 | 7  | 6  | 17  | 20  | 13  | 18  | 20  | 25  |
| SMMPA03422 | 11 | 14 | 4  | 30  | 34  | 19  | 11  | 37  | 27  |
| SMMPA03423 | 41 | 51 | 42 | 63  | 51  | 46  | 49  | 60  | 67  |
| SMMPA03424 | 12 | 17 | 22 | 32  | 22  | 26  | 25  | 24  | 26  |
| SMMPA03425 | 7  | 9  | 7  | 68  | 55  | 54  | 39  | 36  | 54  |
| SMMPA03426 | 9  | 10 | 10 | 31  | 24  | 22  | 22  | 21  | 27  |
| SMMPA03427 | 15 | 20 | 19 | 42  | 35  | 28  | 12  | 25  | 36  |
| SMMPA03428 | 24 | 40 | 22 | 581 | 581 | 475 | 261 | 358 | 313 |
| SMMPA03429 | 29 | 26 | 21 | 85  | 63  | 72  | 33  | 49  | 51  |
| SMMPA03430 | 38 | 43 | 37 | 210 | 171 | 128 | 113 | 158 | 150 |
| SMMPA03431 | 14 | 15 | 13 | 15  | 22  | 15  | 24  | 27  | 18  |
| SMMPA03432 | 24 | 18 | 16 | 23  | 30  | 24  | 29  | 27  | 26  |
| SMMPA03433 | 15 | 27 | 8  | 18  | 21  | 14  | 22  | 34  | 26  |
| SMMPA03434 | 12 | 9  | 11 | 21  | 29  | 39  | 16  | 26  | 17  |
| SMMPA03435 | 38 | 29 | 23 | 36  | 32  | 45  | 37  | 43  | 42  |
| SMMPA03436 | 14 | 17 | 10 | 13  | 10  | 9   | 10  | 21  | 19  |
| SMMPA03437 | 17 | 21 | 13 | 20  | 16  | 18  | 17  | 30  | 12  |
| SMMPA03438 | 36 | 27 | 26 | 43  | 31  | 21  | 28  | 41  | 28  |
| SMMPA03439 | 23 | 22 | 24 | 39  | 30  | 29  | 27  | 38  | 32  |
| SMMPA03440 | 13 | 19 | 10 | 26  | 25  | 23  | 19  | 24  | 24  |
| SMMPA03441 | 6  | 4  | 4  | 88  | 75  | 65  | 62  | 64  | 57  |
| SMMPA03442 | 5  | 10 | 11 | 42  | 59  | 54  | 18  | 47  | 35  |
| SMMPA03443 | 1  | 7  | 4  | 14  | 19  | 11  | 6   | 16  | 10  |
| SMMPA03444 | 24 | 24 | 20 | 181 | 149 | 133 | 88  | 125 | 90  |
| SMMPA03445 | 13 | 18 | 16 | 76  | 71  | 48  | 47  | 46  | 45  |
| SMMPA03446 | 41 | 42 | 31 | 59  | 51  | 43  | 46  | 79  | 58  |
| SMMPA03447 | 35 | 25 | 23 | 64  | 55  | 60  | 50  | 48  | 74  |

|            |    |    |    |     |     |     |     |     |     |
|------------|----|----|----|-----|-----|-----|-----|-----|-----|
| SMMPA03448 | 20 | 24 | 15 | 25  | 32  | 22  | 22  | 24  | 24  |
| SMMPA03449 | 28 | 28 | 24 | 36  | 34  | 32  | 41  | 31  | 22  |
| SMMPA03450 | 19 | 32 | 21 | 38  | 47  | 30  | 31  | 39  | 55  |
| SMMPA03451 | 13 | 13 | 11 | 14  | 16  | 14  | 19  | 23  | 20  |
| SMMPA03452 | 42 | 39 | 30 | 20  | 25  | 21  | 23  | 49  | 25  |
| SMMPA03453 | 28 | 37 | 35 | 31  | 22  | 30  | 29  | 37  | 38  |
| SMMPA03454 | 16 | 20 | 9  | 18  | 9   | 11  | 10  | 33  | 23  |
| SMMPA03455 | 38 | 32 | 27 | 34  | 27  | 23  | 40  | 43  | 38  |
| SMMPA03456 | 17 | 25 | 14 | 25  | 12  | 13  | 22  | 25  | 26  |
| SMMPA03457 | 3  | 10 | 9  | 4   | 3   | 3   | 6   | 17  | 10  |
| SMMPA03458 | 45 | 39 | 33 | 151 | 142 | 122 | 72  | 102 | 107 |
| SMMPA03459 | 21 | 19 | 17 | 39  | 23  | 36  | 20  | 30  | 39  |
| SMMPA03460 | 19 | 11 | 12 | 23  | 13  | 13  | 5   | 31  | 18  |
| SMMPA03461 | 4  | 6  | 12 | 43  | 29  | 40  | 24  | 26  | 16  |
| SMMPA03462 | 28 | 22 | 17 | 39  | 44  | 30  | 33  | 35  | 37  |
| SMMPA03463 | 8  | 5  | 8  | 4   | 5   | 7   | 3   | 15  | 14  |
| SMMPA03464 | 10 | 13 | 10 | 47  | 43  | 34  | 41  | 26  | 28  |
| SMMPA03465 | 4  | 4  | 8  | 13  | 11  | 14  | 7   | 8   | 15  |
| SMMPA03466 | 17 | 18 | 19 | 85  | 98  | 71  | 43  | 60  | 54  |
| SMMPA03467 | 14 | 10 | 10 | 30  | 22  | 17  | 23  | 18  | 25  |
| SMMPA03468 | 2  | 10 | 6  | 27  | 17  | 17  | 16  | 24  | 18  |
| SMMPA03469 | 4  | 7  | 3  | 12  | 6   | 18  | 13  | 16  | 10  |
| SMMPA03470 | 7  | 10 | 6  | 58  | 43  | 20  | 23  | 28  | 24  |
| SMMPA03471 | 23 | 20 | 19 | 181 | 179 | 121 | 68  | 90  | 77  |
| SMMPA03472 | 14 | 9  | 11 | 89  | 98  | 69  | 45  | 49  | 49  |
| SMMPA03473 | 20 | 19 | 12 | 93  | 104 | 59  | 59  | 90  | 76  |
| SMMPA03474 | 21 | 15 | 23 | 308 | 280 | 235 | 123 | 159 | 143 |
| SMMPA03475 | 9  | 12 | 10 | 112 | 92  | 62  | 49  | 56  | 45  |
| SMMPA03476 | 23 | 32 | 27 | 38  | 26  | 39  | 32  | 50  | 44  |
| SMMPA03477 | 11 | 20 | 7  | 57  | 56  | 51  | 60  | 59  | 77  |
| SMMPA03478 | 10 | 14 | 11 | 77  | 83  | 51  | 43  | 53  | 38  |
| SMMPA03479 | 11 | 15 | 10 | 127 | 147 | 105 | 58  | 88  | 65  |
| SMMPA03480 | 18 | 9  | 8  | 68  | 76  | 50  | 22  | 34  | 31  |
| SMMPA03481 | 26 | 29 | 32 | 54  | 64  | 46  | 42  | 76  | 54  |
| SMMPA03482 | 33 | 31 | 25 | 121 | 111 | 76  | 65  | 80  | 71  |
| SMMPA03483 | 22 | 29 | 23 | 88  | 83  | 64  | 60  | 56  | 81  |
| SMMPA03484 | 27 | 36 | 27 | 79  | 59  | 48  | 55  | 74  | 73  |
| SMMPA03485 | 20 | 18 | 25 | 32  | 28  | 27  | 32  | 38  | 35  |
| SMMPA03486 | 25 | 16 | 22 | 31  | 22  | 22  | 34  | 34  | 39  |
| SMMPA03487 | 30 | 27 | 21 | 38  | 26  | 28  | 28  | 40  | 46  |
| SMMPA03488 | 30 | 49 | 30 | 123 | 121 | 99  | 55  | 72  | 68  |

|            |    |    |    |     |     |     |    |     |     |
|------------|----|----|----|-----|-----|-----|----|-----|-----|
| SMMPA03489 | 30 | 37 | 22 | 64  | 52  | 37  | 31 | 42  | 24  |
| SMMPA03490 | 1  | 3  | 4  | 2   | 3   | 2   | 2  | 3   | 10  |
| SMMPA03491 | 34 | 48 | 22 | 156 | 159 | 111 | 82 | 108 | 104 |
| SMMPA03492 | 14 | 23 | 17 | 125 | 123 | 95  | 69 | 83  | 84  |
| SMMPA03493 | 27 | 24 | 25 | 150 | 147 | 82  | 72 | 92  | 84  |
| SMMPA03494 | 13 | 22 | 15 | 28  | 25  | 27  | 30 | 25  | 30  |
| SMMPA03495 | 20 | 19 | 8  | 12  | 10  | 10  | 13 | 20  | 24  |
| SMMPA03496 | 34 | 33 | 31 | 26  | 29  | 23  | 23 | 37  | 32  |
| SMMPA03497 | 76 | 85 | 67 | 39  | 36  | 40  | 57 | 64  | 59  |
| SMMPA03498 | 62 | 68 | 56 | 39  | 45  | 43  | 32 | 65  | 46  |
| SMMPA03499 | 11 | 15 | 9  | 22  | 22  | 20  | 13 | 17  | 13  |
| SMMPA03500 | 47 | 45 | 47 | 58  | 44  | 53  | 39 | 62  | 51  |
| SMMPA03501 | 8  | 7  | 9  | 7   | 13  | 8   | 4  | 11  | 7   |
| SMMPA03502 | 40 | 31 | 31 | 27  | 15  | 19  | 26 | 29  | 44  |
| SMMPA03503 | 27 | 19 | 24 | 70  | 63  | 42  | 75 | 71  | 78  |
| SMMPA03504 | 45 | 30 | 45 | 64  | 63  | 58  | 51 | 67  | 66  |
| SMMPA03505 | 19 | 27 | 21 | 33  | 34  | 34  | 38 | 56  | 51  |
| SMMPA03506 | 30 | 26 | 19 | 50  | 47  | 29  | 24 | 49  | 43  |
| SMMPA03507 | 23 | 27 | 25 | 53  | 43  | 44  | 33 | 41  | 39  |
| SMMPA03508 | 7  | 6  | 4  | 19  | 16  | 16  | 16 | 18  | 20  |
| SMMPA03509 | 13 | 13 | 8  | 18  | 12  | 12  | 17 | 15  | 16  |
| SMMPA03510 | 19 | 14 | 13 | 30  | 30  | 19  | 22 | 22  | 26  |
| SMMPA03511 | 6  | 4  | 1  | 7   | 4   | 4   | 2  | 4   | 3   |
| SMMPA03512 | 9  | 5  | 4  | 21  | 12  | 10  | 11 | 10  | 16  |
| SMMPA03513 | 11 | 7  | 6  | 9   | 10  | 3   | 8  | 11  | 10  |
| SMMPA03514 | 11 | 22 | 14 | 34  | 36  | 22  | 19 | 45  | 36  |
| SMMPA03515 | 3  | 7  | 5  | 9   | 9   | 7   | 13 | 13  | 12  |
| SMMPA03516 | 13 | 11 | 4  | 17  | 14  | 18  | 13 | 20  | 17  |
| SMMPA03517 | 12 | 8  | 12 | 15  | 24  | 20  | 21 | 16  | 14  |
| SMMPA03518 | 19 | 11 | 11 | 34  | 38  | 20  | 19 | 12  | 28  |
| SMMPA03519 | 19 | 13 | 18 | 23  | 24  | 18  | 10 | 25  | 22  |
| SMMPA03520 | 7  | 14 | 11 | 117 | 116 | 87  | 28 | 55  | 39  |
| SMMPA03521 | 10 | 12 | 12 | 26  | 23  | 21  | 10 | 11  | 14  |
| SMMPA03522 | 27 | 26 | 14 | 56  | 50  | 45  | 25 | 50  | 35  |
| SMMPA03523 | 9  | 10 | 5  | 11  | 12  | 4   | 9  | 13  | 12  |
| SMMPA03524 | 16 | 21 | 11 | 19  | 17  | 16  | 20 | 25  | 19  |
| SMMPA03525 | 17 | 16 | 19 | 21  | 22  | 25  | 20 | 26  | 23  |
| SMMPA03526 | 16 | 31 | 18 | 86  | 54  | 65  | 36 | 49  | 48  |
| SMMPA03527 | 10 | 21 | 15 | 72  | 33  | 29  | 30 | 43  | 30  |
| SMMPA03528 | 33 | 24 | 20 | 32  | 37  | 25  | 34 | 42  | 38  |
| SMMPA03529 | 18 | 33 | 17 | 104 | 88  | 84  | 46 | 91  | 62  |

|            |    |    |    |     |     |     |     |     |     |
|------------|----|----|----|-----|-----|-----|-----|-----|-----|
| SMMPA03530 | 14 | 26 | 17 | 38  | 37  | 32  | 21  | 34  | 30  |
| SMMPA03531 | 22 | 25 | 28 | 45  | 33  | 29  | 36  | 35  | 42  |
| SMMPA03532 | 19 | 22 | 18 | 26  | 31  | 20  | 28  | 24  | 22  |
| SMMPA03533 | 19 | 21 | 16 | 20  | 21  | 16  | 15  | 36  | 35  |
| SMMPA03534 | 31 | 28 | 19 | 9   | 13  | 14  | 23  | 27  | 25  |
| SMMPA03535 | 11 | 14 | 19 | 11  | 7   | 10  | 17  | 17  | 21  |
| SMMPA03536 | 18 | 24 | 23 | 798 | 738 | 865 | 461 | 587 | 534 |
| SMMPA03537 | 23 | 19 | 18 | 116 | 122 | 110 | 63  | 64  | 47  |
| SMMPA03538 | 15 | 7  | 9  | 165 | 166 | 128 | 69  | 68  | 85  |
| SMMPA03539 | 26 | 32 | 19 | 397 | 437 | 371 | 122 | 179 | 167 |
| SMMPA03540 | 14 | 25 | 25 | 437 | 489 | 444 | 171 | 229 | 209 |
| SMMPA03541 | 14 | 25 | 24 | 606 | 706 | 635 | 216 | 281 | 232 |
| SMMPA03542 | 14 | 17 | 20 | 169 | 147 | 131 | 74  | 84  | 79  |
| SMMPA03543 | 17 | 24 | 19 | 121 | 100 | 97  | 69  | 75  | 78  |
| SMMPA03544 | 19 | 23 | 20 | 86  | 98  | 54  | 46  | 64  | 51  |
| SMMPA03545 | 24 | 22 | 27 | 147 | 128 | 110 | 66  | 62  | 62  |
| SMMPA03546 | 5  | 10 | 4  | 185 | 163 | 129 | 46  | 64  | 62  |
| SMMPA03547 | 36 | 42 | 45 | 40  | 41  | 33  | 46  | 38  | 59  |
| SMMPA03548 | 42 | 31 | 24 | 52  | 40  | 44  | 36  | 53  | 39  |
| SMMPA03549 | 15 | 20 | 18 | 40  | 43  | 33  | 29  | 43  | 41  |
| SMMPA03550 | 28 | 32 | 13 | 35  | 33  | 35  | 32  | 43  | 39  |
| SMMPA03551 | 44 | 56 | 40 | 94  | 72  | 72  | 65  | 89  | 68  |
| SMMPA03552 | 16 | 13 | 8  | 12  | 12  | 23  | 15  | 14  | 25  |
| SMMPA03553 | 33 | 41 | 32 | 37  | 43  | 40  | 53  | 72  | 62  |
| SMMPA03554 | 24 | 22 | 26 | 27  | 33  | 28  | 27  | 46  | 40  |
| SMMPA03555 | 39 | 38 | 28 | 111 | 116 | 77  | 64  | 83  | 79  |
| SMMPA03556 | 19 | 15 | 9  | 40  | 41  | 36  | 35  | 61  | 58  |
| SMMPA03557 | 40 | 30 | 30 | 50  | 47  | 55  | 45  | 58  | 68  |
| SMMPA03558 | 15 | 15 | 9  | 14  | 10  | 15  | 19  | 33  | 28  |
| SMMPA03559 | 13 | 10 | 14 | 26  | 24  | 24  | 23  | 27  | 18  |
| SMMPA03560 | 20 | 15 | 17 | 245 | 239 | 186 | 117 | 153 | 150 |
| SMMPA03561 | 11 | 12 | 10 | 13  | 18  | 14  | 20  | 25  | 21  |
| SMMPA03562 | 9  | 6  | 7  | 16  | 15  | 12  | 20  | 18  | 18  |
| SMMPA03563 | 6  | 7  | 6  | 18  | 14  | 10  | 13  | 17  | 14  |
| SMMPA03564 | 11 | 15 | 17 | 44  | 47  | 37  | 40  | 41  | 38  |
| SMMPA03565 | 13 | 19 | 11 | 27  | 32  | 26  | 24  | 38  | 24  |
| SMMPA03566 | 9  | 10 | 12 | 12  | 8   | 10  | 7   | 21  | 12  |
| SMMPA03567 | 6  | 15 | 5  | 31  | 27  | 30  | 14  | 14  | 21  |
| SMMPA03568 | 8  | 10 | 8  | 182 | 181 | 162 | 83  | 112 | 109 |
| SMMPA03569 | 13 | 16 | 11 | 201 | 200 | 167 | 82  | 79  | 85  |
| SMMPA03570 | 11 | 16 | 17 | 107 | 122 | 75  | 62  | 62  | 57  |



|            |    |    |    |     |     |     |     |     |     |
|------------|----|----|----|-----|-----|-----|-----|-----|-----|
| SMMPA03571 | 11 | 15 | 11 | 333 | 317 | 300 | 234 | 306 | 301 |
| SMMPA03572 | 19 | 18 | 16 | 153 | 142 | 118 | 52  | 37  | 47  |
| SMMPA03573 | 5  | 6  | 5  | 10  | 11  | 10  | 7   | 9   | 8   |
| SMMPA03574 | 17 | 13 | 5  | 85  | 69  | 52  | 34  | 41  | 34  |
| SMMPA03575 | 29 | 26 | 17 | 34  | 33  | 40  | 27  | 36  | 26  |
| SMMPA03576 | 23 | 30 | 19 | 55  | 58  | 38  | 34  | 34  | 41  |
| SMMPA03577 | 18 | 26 | 20 | 27  | 39  | 28  | 26  | 25  | 26  |
| SMMPA03578 | 15 | 14 | 8  | 13  | 19  | 18  | 24  | 29  | 27  |
| SMMPA03579 | 6  | 9  | 8  | 15  | 4   | 9   | 10  | 16  | 11  |
| SMMPA03580 | 16 | 9  | 5  | 11  | 5   | 6   | 7   | 12  | 2   |
| SMMPA03581 | 14 | 16 | 10 | 37  | 38  | 22  | 18  | 13  | 15  |
| SMMPA03582 | 30 | 23 | 16 | 84  | 83  | 77  | 32  | 49  | 57  |
| SMMPA03583 | 2  | 5  | 3  | 5   | 2   | 0   | 2   | 8   | 5   |
| SMMPA03584 | 29 | 34 | 33 | 41  | 35  | 46  | 38  | 48  | 43  |
| SMMPA03585 | 4  | 1  | 1  | 9   | 10  | 5   | 4   | 7   | 2   |
| SMMPA03586 | 29 | 35 | 20 | 88  | 60  | 48  | 50  | 51  | 50  |
| SMMPA03587 | 23 | 18 | 13 | 59  | 55  | 62  | 27  | 49  | 39  |
| SMMPA03588 | 3  | 9  | 3  | 5   | 2   | 4   | 6   | 1   | 9   |
| SMMPA03589 | 25 | 13 | 20 | 107 | 102 | 79  | 51  | 77  | 61  |
| SMMPA03590 | 16 | 20 | 18 | 83  | 89  | 53  | 56  | 73  | 57  |
| SMMPA03591 | 18 | 23 | 14 | 44  | 50  | 41  | 44  | 44  | 52  |
| SMMPA03592 | 7  | 7  | 11 | 28  | 15  | 11  | 12  | 23  | 20  |
| SMMPA03593 | 9  | 9  | 13 | 27  | 26  | 23  | 29  | 28  | 30  |
| SMMPA03594 | 23 | 17 | 24 | 171 | 136 | 121 | 61  | 90  | 81  |
| SMMPA03595 | 13 | 9  | 5  | 19  | 21  | 22  | 14  | 18  | 16  |
| SMMPA03596 | 10 | 15 | 11 | 44  | 45  | 31  | 16  | 20  | 11  |
| SMMPA03597 | 14 | 21 | 20 | 87  | 98  | 65  | 51  | 76  | 45  |
| SMMPA03598 | 4  | 5  | 4  | 22  | 12  | 18  | 13  | 24  | 11  |
| SMMPA03599 | 12 | 17 | 20 | 60  | 49  | 32  | 39  | 48  | 41  |
| SMMPA03600 | 14 | 6  | 9  | 11  | 16  | 16  | 34  | 31  | 33  |
| SMMPA03601 | 13 | 8  | 8  | 21  | 23  | 19  | 24  | 27  | 25  |
| SMMPA03602 | 15 | 13 | 11 | 23  | 21  | 6   | 22  | 28  | 28  |
| SMMPA03603 | 42 | 38 | 24 | 86  | 111 | 65  | 68  | 72  | 76  |
| SMMPA03604 | 42 | 33 | 32 | 61  | 44  | 48  | 36  | 50  | 43  |
| SMMPA03605 | 19 | 22 | 18 | 49  | 29  | 25  | 21  | 28  | 20  |
| SMMPA03606 | 31 | 19 | 24 | 52  | 52  | 32  | 28  | 39  | 28  |
| SMMPA03607 | 43 | 39 | 24 | 53  | 70  | 56  | 37  | 41  | 41  |
| SMMPA03608 | 9  | 16 | 5  | 9   | 4   | 7   | 13  | 13  | 8   |
| SMMPA03609 | 29 | 32 | 26 | 130 | 84  | 73  | 48  | 61  | 52  |
| SMMPA03610 | 19 | 24 | 23 | 31  | 33  | 34  | 32  | 35  | 41  |
| SMMPA03611 | 13 | 15 | 21 | 30  | 27  | 22  | 25  | 26  | 28  |

|            |    |    |    |     |     |     |     |     |     |
|------------|----|----|----|-----|-----|-----|-----|-----|-----|
| SMMPA03612 | 14 | 21 | 16 | 41  | 58  | 26  | 27  | 31  | 23  |
| SMMPA03613 | 35 | 37 | 33 | 185 | 164 | 138 | 71  | 110 | 103 |
| SMMPA03614 | 26 | 28 | 22 | 165 | 181 | 113 | 119 | 169 | 116 |
| SMMPA03615 | 31 | 41 | 41 | 75  | 90  | 80  | 68  | 107 | 89  |
| SMMPA03616 | 24 | 19 | 15 | 188 | 160 | 121 | 96  | 120 | 101 |
| SMMPA03617 | 20 | 21 | 22 | 540 | 470 | 378 | 215 | 315 | 250 |
| SMMPA03618 | 15 | 16 | 17 | 138 | 137 | 128 | 75  | 89  | 79  |
| SMMPA03619 | 28 | 44 | 37 | 299 | 285 | 255 | 141 | 194 | 152 |
| SMMPA03620 | 47 | 40 | 40 | 84  | 81  | 89  | 57  | 79  | 61  |
| SMMPA03621 | 12 | 26 | 17 | 23  | 20  | 25  | 14  | 19  | 31  |
| SMMPA03622 | 23 | 27 | 21 | 19  | 35  | 24  | 32  | 46  | 48  |
| SMMPA03623 | 17 | 21 | 12 | 24  | 21  | 26  | 33  | 39  | 36  |
| SMMPA03624 | 21 | 24 | 19 | 208 | 162 | 112 | 78  | 82  | 103 |
| SMMPA03625 | 17 | 14 | 28 | 99  | 69  | 63  | 26  | 42  | 33  |
| SMMPA03626 | 30 | 26 | 15 | 34  | 27  | 34  | 32  | 41  | 39  |
| SMMPA03627 | 22 | 13 | 15 | 21  | 21  | 13  | 9   | 28  | 24  |
| SMMPA03628 | 33 | 47 | 23 | 52  | 40  | 39  | 43  | 50  | 53  |
| SMMPA03629 | 35 | 29 | 43 | 523 | 460 | 397 | 191 | 265 | 239 |
| SMMPA03630 | 18 | 19 | 11 | 30  | 30  | 29  | 32  | 37  | 45  |
| SMMPA03631 | 21 | 23 | 17 | 35  | 28  | 34  | 20  | 22  | 34  |
| SMMPA03632 | 19 | 20 | 18 | 65  | 37  | 38  | 36  | 37  | 30  |
| SMMPA03633 | 22 | 23 | 31 | 42  | 47  | 29  | 33  | 37  | 43  |
| SMMPA03634 | 34 | 40 | 30 | 77  | 65  | 53  | 54  | 63  | 57  |
| SMMPA03635 | 29 | 26 | 19 | 58  | 50  | 39  | 38  | 56  | 47  |
| SMMPA03636 | 21 | 27 | 19 | 22  | 34  | 28  | 20  | 29  | 24  |
| SMMPA03637 | 64 | 64 | 38 | 65  | 64  | 54  | 56  | 61  | 57  |
| SMMPA03638 | 12 | 13 | 11 | 28  | 42  | 19  | 13  | 12  | 24  |
| SMMPA03639 | 27 | 39 | 31 | 127 | 132 | 93  | 69  | 85  | 81  |
| SMMPA03640 | 37 | 25 | 28 | 161 | 185 | 159 | 95  | 137 | 118 |
| SMMPA03641 | 24 | 18 | 18 | 158 | 159 | 89  | 73  | 90  | 101 |
| SMMPA03642 | 29 | 39 | 29 | 284 | 261 | 202 | 115 | 169 | 135 |
| SMMPA03643 | 23 | 21 | 21 | 16  | 26  | 28  | 22  | 33  | 35  |
| SMMPA03644 | 30 | 25 | 25 | 69  | 74  | 43  | 43  | 70  | 72  |
| SMMPA03645 | 18 | 23 | 21 | 51  | 28  | 32  | 36  | 52  | 40  |
| SMMPA03646 | 23 | 24 | 26 | 227 | 241 | 186 | 100 | 145 | 166 |
| SMMPA03647 | 21 | 20 | 18 | 75  | 79  | 73  | 27  | 48  | 37  |
| SMMPA03648 | 17 | 32 | 22 | 22  | 33  | 29  | 32  | 37  | 27  |
| SMMPA03649 | 9  | 3  | 10 | 19  | 15  | 12  | 11  | 12  | 15  |
| SMMPA03650 | 20 | 26 | 22 | 217 | 234 | 196 | 58  | 90  | 84  |
| SMMPA03651 | 29 | 31 | 24 | 166 | 185 | 144 | 56  | 64  | 56  |
| SMMPA03652 | 10 | 10 | 10 | 15  | 20  | 11  | 12  | 20  | 14  |

|            |    |    |    |     |     |     |     |     |     |
|------------|----|----|----|-----|-----|-----|-----|-----|-----|
| SMMPA03653 | 20 | 18 | 27 | 49  | 52  | 40  | 27  | 35  | 31  |
| SMMPA03654 | 16 | 16 | 17 | 27  | 25  | 21  | 28  | 28  | 21  |
| SMMPA03655 | 5  | 4  | 5  | 77  | 57  | 46  | 74  | 90  | 85  |
| SMMPA03656 | 6  | 5  | 7  | 11  | 11  | 8   | 18  | 24  | 20  |
| SMMPA03657 | 1  | 3  | 4  | 1   | 0   | 1   | 5   | 12  | 4   |
| SMMPA03658 | 11 | 7  | 8  | 21  | 27  | 27  | 22  | 35  | 15  |
| SMMPA03659 | 4  | 1  | 0  | 5   | 3   | 2   | 5   | 4   | 5   |
| SMMPA03660 | 9  | 6  | 9  | 9   | 4   | 8   | 16  | 24  | 24  |
| SMMPA03661 | 6  | 5  | 12 | 12  | 5   | 10  | 22  | 28  | 29  |
| SMMPA03662 | 3  | 3  | 5  | 6   | 6   | 8   | 15  | 14  | 6   |
| SMMPA03663 | 2  | 1  | 2  | 5   | 1   | 2   | 3   | 9   | 6   |
| SMMPA03664 | 12 | 18 | 11 | 14  | 12  | 13  | 22  | 37  | 23  |
| SMMPA03665 | 45 | 42 | 35 | 147 | 151 | 113 | 82  | 94  | 91  |
| SMMPA03666 | 49 | 57 | 43 | 967 | 859 | 688 | 362 | 494 | 428 |
| SMMPA03667 | 22 | 11 | 11 | 32  | 28  | 17  | 22  | 23  | 32  |
| SMMPA03668 | 47 | 43 | 21 | 114 | 84  | 76  | 58  | 79  | 59  |
| SMMPA03669 | 29 | 19 | 18 | 73  | 62  | 42  | 26  | 46  | 31  |
| SMMPA03670 | 37 | 31 | 29 | 124 | 108 | 100 | 78  | 97  | 107 |
| SMMPA03671 | 37 | 29 | 31 | 344 | 314 | 231 | 238 | 298 | 305 |
| SMMPA03672 | 13 | 10 | 10 | 94  | 81  | 61  | 50  | 53  | 58  |
| SMMPA03673 | 17 | 16 | 12 | 33  | 34  | 19  | 34  | 37  | 26  |
| SMMPA03674 | 21 | 17 | 13 | 206 | 212 | 147 | 94  | 112 | 120 |
| SMMPA03675 | 42 | 54 | 61 | 152 | 132 | 101 | 121 | 125 | 142 |
| SMMPA03676 | 28 | 20 | 10 | 104 | 102 | 83  | 47  | 79  | 67  |
| SMMPA03677 | 12 | 24 | 12 | 75  | 74  | 55  | 45  | 76  | 61  |
| SMMPA03678 | 24 | 29 | 38 | 43  | 47  | 43  | 44  | 43  | 39  |
| SMMPA03679 | 30 | 37 | 35 | 38  | 25  | 24  | 24  | 36  | 25  |
| SMMPA03680 | 10 | 10 | 7  | 8   | 10  | 7   | 11  | 16  | 17  |
| SMMPA03681 | 24 | 32 | 31 | 32  | 30  | 18  | 23  | 36  | 39  |
| SMMPA03682 | 12 | 14 | 9  | 18  | 22  | 19  | 24  | 41  | 27  |
| SMMPA03683 | 16 | 16 | 11 | 26  | 29  | 17  | 25  | 34  | 31  |
| SMMPA03684 | 17 | 13 | 16 | 7   | 13  | 16  | 28  | 23  | 19  |
| SMMPA03685 | 19 | 17 | 12 | 20  | 20  | 21  | 18  | 31  | 35  |
| SMMPA03686 | 21 | 19 | 8  | 16  | 26  | 20  | 20  | 24  | 23  |
| SMMPA03687 | 25 | 27 | 17 | 26  | 23  | 27  | 32  | 43  | 30  |
| SMMPA03688 | 13 | 9  | 17 | 11  | 11  | 6   | 24  | 19  | 24  |
| SMMPA03689 | 22 | 11 | 8  | 14  | 19  | 19  | 26  | 33  | 37  |
| SMMPA03690 | 17 | 14 | 14 | 15  | 15  | 19  | 17  | 23  | 37  |
| SMMPA03691 | 12 | 18 | 20 | 20  | 17  | 30  | 10  | 32  | 19  |
| SMMPA03692 | 13 | 14 | 11 | 12  | 17  | 9   | 26  | 21  | 16  |
| SMMPA03693 | 33 | 29 | 32 | 44  | 33  | 23  | 36  | 49  | 40  |

|            |    |    |    |     |     |     |     |     |     |
|------------|----|----|----|-----|-----|-----|-----|-----|-----|
| SMMPA03694 | 32 | 28 | 29 | 56  | 42  | 46  | 42  | 66  | 50  |
| SMMPA03695 | 52 | 53 | 40 | 49  | 53  | 85  | 49  | 64  | 68  |
| SMMPA03696 | 21 | 27 | 20 | 45  | 36  | 27  | 36  | 57  | 31  |
| SMMPA03697 | 23 | 22 | 19 | 23  | 29  | 28  | 29  | 33  | 39  |
| SMMPA03698 | 45 | 43 | 38 | 43  | 44  | 42  | 26  | 52  | 45  |
| SMMPA03699 | 19 | 23 | 19 | 42  | 38  | 34  | 30  | 44  | 35  |
| SMMPA03700 | 24 | 25 | 20 | 19  | 17  | 12  | 29  | 23  | 30  |
| SMMPA03701 | 26 | 20 | 25 | 38  | 49  | 30  | 25  | 32  | 33  |
| SMMPA03702 | 22 | 32 | 21 | 26  | 31  | 31  | 35  | 48  | 31  |
| SMMPA03703 | 31 | 25 | 15 | 58  | 53  | 50  | 41  | 55  | 50  |
| SMMPA03704 | 9  | 17 | 21 | 49  | 51  | 26  | 34  | 29  | 49  |
| SMMPA03705 | 28 | 14 | 24 | 45  | 43  | 35  | 28  | 31  | 39  |
| SMMPA03706 | 23 | 17 | 14 | 30  | 33  | 35  | 31  | 28  | 21  |
| SMMPA03707 | 8  | 16 | 13 | 9   | 16  | 13  | 24  | 24  | 21  |
| SMMPA03708 | 17 | 18 | 12 | 61  | 57  | 50  | 26  | 40  | 39  |
| SMMPA03709 | 12 | 14 | 20 | 56  | 59  | 39  | 60  | 87  | 66  |
| SMMPA03710 | 19 | 13 | 5  | 38  | 38  | 36  | 34  | 35  | 37  |
| SMMPA03711 | 8  | 5  | 8  | 79  | 60  | 40  | 21  | 42  | 39  |
| SMMPA03712 | 29 | 22 | 40 | 50  | 63  | 48  | 48  | 67  | 53  |
| SMMPA03713 | 30 | 22 | 15 | 65  | 47  | 41  | 42  | 61  | 42  |
| SMMPA03714 | 18 | 30 | 22 | 60  | 77  | 45  | 49  | 52  | 58  |
| SMMPA03715 | 31 | 27 | 22 | 73  | 87  | 63  | 41  | 55  | 71  |
| SMMPA03716 | 22 | 23 | 18 | 84  | 70  | 54  | 40  | 76  | 59  |
| SMMPA03717 | 9  | 14 | 14 | 25  | 27  | 27  | 21  | 24  | 15  |
| SMMPA03718 | 38 | 33 | 22 | 373 | 361 | 275 | 206 | 248 | 224 |
| SMMPA03719 | 15 | 13 | 17 | 98  | 83  | 80  | 40  | 59  | 41  |
| SMMPA03720 | 14 | 16 | 19 | 152 | 140 | 116 | 49  | 54  | 54  |
| SMMPA03721 | 19 | 24 | 15 | 106 | 94  | 70  | 56  | 79  | 44  |
| SMMPA03722 | 19 | 34 | 25 | 117 | 89  | 85  | 56  | 59  | 75  |
| SMMPA03723 | 16 | 16 | 16 | 33  | 39  | 35  | 28  | 41  | 32  |
| SMMPA03724 | 5  | 10 | 15 | 20  | 22  | 15  | 20  | 30  | 21  |
| SMMPA03725 | 12 | 11 | 12 | 22  | 18  | 23  | 19  | 37  | 36  |
| SMMPA03726 | 0  | 3  | 1  | 11  | 11  | 8   | 1   | 2   | 1   |
| SMMPA03727 | 28 | 15 | 24 | 32  | 27  | 37  | 27  | 25  | 29  |
| SMMPA03728 | 28 | 17 | 17 | 44  | 51  | 56  | 38  | 55  | 49  |
| SMMPA03729 | 4  | 11 | 6  | 9   | 11  | 6   | 13  | 9   | 9   |
| SMMPA03730 | 25 | 35 | 30 | 46  | 29  | 33  | 37  | 44  | 48  |
| SMMPA03731 | 78 | 85 | 80 | 53  | 39  | 57  | 87  | 119 | 109 |
| SMMPA03732 | 18 | 30 | 17 | 48  | 38  | 34  | 48  | 51  | 60  |
| SMMPA03733 | 23 | 26 | 18 | 34  | 34  | 32  | 29  | 50  | 48  |
| SMMPA03734 | 29 | 31 | 19 | 37  | 34  | 36  | 37  | 57  | 50  |

|            |     |     |     |     |     |     |     |     |     |
|------------|-----|-----|-----|-----|-----|-----|-----|-----|-----|
| SMMPA03735 | 30  | 26  | 23  | 47  | 40  | 35  | 44  | 68  | 54  |
| SMMPA03736 | 19  | 14  | 14  | 38  | 34  | 31  | 53  | 49  | 44  |
| SMMPA03737 | 23  | 15  | 21  | 50  | 42  | 44  | 35  | 41  | 40  |
| SMMPA03738 | 34  | 32  | 19  | 70  | 89  | 64  | 50  | 57  | 69  |
| SMMPA03739 | 9   | 13  | 12  | 46  | 36  | 25  | 11  | 34  | 27  |
| SMMPA03740 | 28  | 15  | 20  | 58  | 48  | 57  | 41  | 38  | 43  |
| SMMPA03741 | 27  | 26  | 19  | 37  | 41  | 29  | 41  | 55  | 53  |
| SMMPA03742 | 31  | 32  | 26  | 34  | 17  | 23  | 29  | 53  | 40  |
| SMMPA03743 | 25  | 21  | 23  | 109 | 93  | 55  | 47  | 80  | 60  |
| SMMPA03744 | 20  | 21  | 30  | 34  | 55  | 41  | 40  | 49  | 45  |
| SMMPA03745 | 17  | 30  | 20  | 26  | 31  | 23  | 32  | 31  | 39  |
| SMMPA03746 | 16  | 21  | 16  | 30  | 43  | 33  | 39  | 45  | 41  |
| SMMPA03747 | 36  | 23  | 24  | 44  | 40  | 44  | 27  | 31  | 40  |
| SMMPA03748 | 39  | 32  | 49  | 62  | 42  | 48  | 34  | 47  | 49  |
| SMMPA03749 | 24  | 35  | 23  | 44  | 41  | 39  | 45  | 42  | 37  |
| SMMPA03750 | 6   | 3   | 2   | 10  | 9   | 4   | 14  | 14  | 14  |
| SMMPA03751 | 13  | 22  | 11  | 20  | 16  | 18  | 32  | 29  | 43  |
| SMMPA03752 | 11  | 6   | 7   | 27  | 33  | 24  | 20  | 36  | 41  |
| SMMPA03753 | 12  | 16  | 19  | 42  | 39  | 28  | 39  | 48  | 41  |
| SMMPA03754 | 6   | 14  | 11  | 18  | 15  | 37  | 29  | 31  | 38  |
| SMMPA03755 | 15  | 17  | 14  | 57  | 48  | 32  | 44  | 54  | 77  |
| SMMPA03756 | 22  | 22  | 20  | 21  | 28  | 19  | 24  | 36  | 30  |
| SMMPA03757 | 13  | 13  | 2   | 16  | 17  | 11  | 7   | 25  | 27  |
| SMMPA03758 | 39  | 41  | 24  | 54  | 55  | 35  | 40  | 71  | 57  |
| SMMPA03759 | 15  | 22  | 16  | 17  | 18  | 19  | 26  | 25  | 28  |
| SMMPA03760 | 17  | 20  | 15  | 53  | 51  | 42  | 49  | 70  | 57  |
| SMMPA03761 | 18  | 16  | 20  | 45  | 35  | 28  | 25  | 33  | 41  |
| SMMPA03762 | 15  | 28  | 22  | 25  | 19  | 25  | 24  | 30  | 28  |
| SMMPA03763 | 8   | 17  | 10  | 10  | 9   | 20  | 9   | 15  | 17  |
| SMMPA03764 | 26  | 15  | 18  | 17  | 15  | 18  | 23  | 42  | 29  |
| SMMPA03765 | 20  | 21  | 14  | 21  | 23  | 28  | 21  | 45  | 35  |
| SMMPA03766 | 117 | 128 | 112 | 73  | 47  | 68  | 98  | 156 | 129 |
| SMMPA03767 | 12  | 21  | 17  | 40  | 48  | 48  | 23  | 32  | 20  |
| SMMPA03768 | 19  | 17  | 28  | 25  | 18  | 10  | 31  | 27  | 36  |
| SMMPA03769 | 25  | 33  | 29  | 216 | 182 | 136 | 91  | 120 | 105 |
| SMMPA03770 | 15  | 19  | 24  | 111 | 101 | 72  | 46  | 64  | 57  |
| SMMPA03771 | 27  | 38  | 32  | 254 | 219 | 165 | 110 | 171 | 147 |
| SMMPA03772 | 12  | 6   | 13  | 104 | 98  | 88  | 40  | 37  | 53  |
| SMMPA03773 | 26  | 47  | 36  | 359 | 332 | 263 | 186 | 229 | 237 |
| SMMPA03774 | 10  | 8   | 11  | 183 | 192 | 177 | 45  | 75  | 63  |
| SMMPA03775 | 7   | 8   | 8   | 128 | 120 | 90  | 57  | 60  | 63  |

|            |    |    |    |     |     |     |     |     |     |
|------------|----|----|----|-----|-----|-----|-----|-----|-----|
| SMMPA03776 | 13 | 24 | 23 | 160 | 156 | 113 | 115 | 123 | 99  |
| SMMPA03777 | 30 | 26 | 22 | 530 | 549 | 437 | 217 | 331 | 281 |
| SMMPA03778 | 25 | 14 | 16 | 81  | 91  | 80  | 42  | 52  | 61  |
| SMMPA03779 | 14 | 18 | 18 | 15  | 17  | 16  | 20  | 23  | 35  |
| SMMPA03780 | 5  | 24 | 15 | 16  | 14  | 12  | 21  | 34  | 23  |
| SMMPA03781 | 1  | 3  | 1  | 4   | 6   | 3   | 7   | 5   | 9   |
| SMMPA03782 | 26 | 34 | 24 | 68  | 69  | 56  | 44  | 67  | 64  |
| SMMPA03783 | 15 | 14 | 21 | 41  | 39  | 45  | 24  | 33  | 22  |
| SMMPA03784 | 11 | 16 | 16 | 28  | 21  | 31  | 22  | 18  | 22  |
| SMMPA03785 | 15 | 16 | 15 | 74  | 65  | 63  | 38  | 69  | 56  |
| SMMPA03786 | 30 | 32 | 25 | 74  | 54  | 59  | 34  | 64  | 61  |
| SMMPA03787 | 45 | 41 | 26 | 73  | 86  | 64  | 63  | 85  | 103 |
| SMMPA03788 | 17 | 12 | 5  | 27  | 11  | 24  | 5   | 15  | 16  |
| SMMPA03789 | 19 | 25 | 24 | 54  | 64  | 39  | 47  | 70  | 59  |
| SMMPA03790 | 19 | 24 | 18 | 73  | 80  | 50  | 45  | 65  | 42  |
| SMMPA03791 | 14 | 20 | 15 | 29  | 26  | 27  | 23  | 36  | 33  |
| SMMPA03792 | 13 | 22 | 25 | 29  | 31  | 24  | 22  | 35  | 36  |
| SMMPA03793 | 25 | 15 | 21 | 41  | 27  | 33  | 18  | 41  | 34  |
| SMMPA03794 | 19 | 24 | 24 | 45  | 34  | 32  | 45  | 43  | 53  |
| SMMPA03795 | 21 | 20 | 19 | 37  | 37  | 35  | 18  | 26  | 21  |
| SMMPA03796 | 25 | 29 | 28 | 136 | 131 | 91  | 53  | 74  | 71  |
| SMMPA03797 | 26 | 17 | 19 | 42  | 34  | 37  | 18  | 41  | 34  |
| SMMPA03798 | 33 | 30 | 40 | 43  | 54  | 41  | 52  | 51  | 60  |
| SMMPA03799 | 14 | 24 | 15 | 74  | 70  | 58  | 30  | 48  | 40  |
| SMMPA03800 | 18 | 23 | 21 | 51  | 47  | 33  | 21  | 37  | 43  |
| SMMPA03801 | 18 | 15 | 13 | 15  | 21  | 15  | 7   | 16  | 10  |
| SMMPA03802 | 17 | 27 | 25 | 56  | 52  | 54  | 44  | 51  | 45  |
| SMMPA03803 | 26 | 28 | 38 | 62  | 53  | 39  | 38  | 45  | 47  |
| SMMPA03804 | 17 | 17 | 18 | 61  | 62  | 43  | 26  | 26  | 26  |
| SMMPA03805 | 10 | 14 | 13 | 22  | 17  | 23  | 15  | 21  | 10  |
| SMMPA03806 | 24 | 19 | 24 | 30  | 31  | 29  | 25  | 32  | 20  |
| SMMPA03807 | 9  | 6  | 8  | 18  | 20  | 29  | 9   | 15  | 21  |
| SMMPA03808 | 21 | 14 | 18 | 30  | 28  | 20  | 14  | 13  | 16  |
| SMMPA03809 | 34 | 31 | 27 | 14  | 23  | 23  | 14  | 34  | 26  |
| SMMPA03810 | 23 | 24 | 19 | 162 | 146 | 86  | 50  | 90  | 84  |
| SMMPA03811 | 13 | 10 | 15 | 11  | 19  | 14  | 5   | 14  | 6   |
| SMMPA03812 | 31 | 38 | 33 | 31  | 38  | 31  | 52  | 74  | 62  |
| SMMPA03813 | 33 | 32 | 35 | 54  | 70  | 51  | 68  | 82  | 91  |
| SMMPA03814 | 22 | 22 | 25 | 51  | 64  | 42  | 55  | 59  | 46  |
| SMMPA03815 | 35 | 39 | 39 | 52  | 41  | 38  | 51  | 66  | 61  |
| SMMPA03816 | 18 | 15 | 13 | 46  | 46  | 35  | 48  | 47  | 40  |

|            |    |    |    |     |     |     |     |     |     |
|------------|----|----|----|-----|-----|-----|-----|-----|-----|
| SMMPA03817 | 20 | 19 | 13 | 30  | 30  | 22  | 25  | 27  | 35  |
| SMMPA03818 | 7  | 10 | 7  | 53  | 38  | 39  | 27  | 28  | 34  |
| SMMPA03819 | 22 | 34 | 18 | 75  | 86  | 54  | 63  | 88  | 74  |
| SMMPA03820 | 17 | 17 | 14 | 20  | 26  | 13  | 25  | 41  | 46  |
| SMMPA03821 | 12 | 18 | 13 | 38  | 32  | 23  | 34  | 41  | 36  |
| SMMPA03822 | 16 | 15 | 15 | 10  | 16  | 11  | 21  | 18  | 25  |
| SMMPA03823 | 6  | 14 | 15 | 5   | 4   | 6   | 11  | 10  | 14  |
| SMMPA03824 | 36 | 48 | 25 | 494 | 384 | 340 | 224 | 284 | 307 |
| SMMPA03825 | 29 | 26 | 13 | 80  | 66  | 57  | 49  | 60  | 67  |
| SMMPA03826 | 16 | 23 | 19 | 23  | 23  | 20  | 17  | 29  | 31  |
| SMMPA03827 | 10 | 14 | 7  | 90  | 87  | 58  | 53  | 67  | 52  |
| SMMPA03828 | 74 | 64 | 58 | 324 | 316 | 273 | 170 | 220 | 191 |
| SMMPA03829 | 22 | 17 | 12 | 59  | 57  | 53  | 36  | 44  | 51  |
| SMMPA03830 | 22 | 14 | 17 | 20  | 22  | 22  | 18  | 21  | 24  |
| SMMPA03831 | 17 | 19 | 12 | 34  | 36  | 30  | 20  | 21  | 23  |
| SMMPA03832 | 15 | 13 | 14 | 20  | 23  | 15  | 16  | 32  | 25  |
| SMMPA03833 | 31 | 40 | 29 | 245 | 245 | 194 | 116 | 156 | 162 |
| SMMPA03834 | 20 | 10 | 11 | 18  | 16  | 13  | 16  | 23  | 20  |
| SMMPA03835 | 26 | 16 | 27 | 65  | 48  | 44  | 30  | 42  | 40  |
| SMMPA03836 | 6  | 12 | 6  | 15  | 16  | 8   | 5   | 17  | 19  |
| SMMPA03837 | 41 | 42 | 32 | 74  | 74  | 85  | 47  | 74  | 65  |
| SMMPA03838 | 48 | 30 | 33 | 100 | 94  | 79  | 59  | 58  | 67  |
| SMMPA03839 | 12 | 11 | 13 | 12  | 19  | 27  | 22  | 15  | 30  |
| SMMPA03840 | 25 | 29 | 27 | 26  | 25  | 32  | 32  | 50  | 41  |
| SMMPA03841 | 58 | 68 | 45 | 40  | 35  | 39  | 35  | 50  | 58  |
| SMMPA03842 | 22 | 26 | 13 | 28  | 22  | 25  | 21  | 52  | 33  |
| SMMPA03843 | 33 | 37 | 36 | 51  | 59  | 40  | 55  | 82  | 60  |
| SMMPA03844 | 32 | 41 | 36 | 50  | 53  | 60  | 38  | 49  | 57  |
| SMMPA03845 | 20 | 32 | 17 | 24  | 26  | 23  | 38  | 38  | 59  |
| SMMPA03846 | 5  | 4  | 4  | 7   | 12  | 11  | 10  | 17  | 8   |
| SMMPA03847 | 18 | 12 | 25 | 16  | 20  | 16  | 26  | 24  | 25  |
| SMMPA03848 | 12 | 14 | 13 | 22  | 13  | 17  | 19  | 23  | 12  |
| SMMPA03849 | 33 | 35 | 19 | 36  | 27  | 25  | 21  | 35  | 27  |
| SMMPA03850 | 30 | 22 | 24 | 46  | 45  | 35  | 43  | 57  | 47  |
| SMMPA03851 | 12 | 14 | 12 | 15  | 15  | 13  | 21  | 28  | 26  |
| SMMPA03852 | 8  | 7  | 10 | 9   | 5   | 11  | 13  | 12  | 9   |
| SMMPA03853 | 9  | 15 | 15 | 19  | 20  | 19  | 39  | 34  | 36  |
| SMMPA03854 | 13 | 22 | 27 | 72  | 70  | 51  | 35  | 47  | 39  |
| SMMPA03855 | 24 | 25 | 15 | 19  | 19  | 19  | 23  | 25  | 35  |
| SMMPA03856 | 9  | 18 | 9  | 17  | 16  | 21  | 13  | 13  | 17  |
| SMMPA03857 | 27 | 37 | 37 | 37  | 40  | 34  | 35  | 37  | 38  |

|            |    |    |    |     |     |     |     |     |     |
|------------|----|----|----|-----|-----|-----|-----|-----|-----|
| SMMPA03858 | 7  | 8  | 6  | 7   | 7   | 9   | 12  | 9   | 17  |
| SMMPA03859 | 24 | 16 | 11 | 24  | 25  | 20  | 23  | 22  | 19  |
| SMMPA03860 | 34 | 43 | 46 | 33  | 26  | 28  | 45  | 46  | 57  |
| SMMPA03861 | 4  | 4  | 1  | 2   | 6   | 4   | 5   | 8   | 5   |
| SMMPA03862 | 38 | 41 | 33 | 41  | 29  | 38  | 36  | 42  | 43  |
| SMMPA03863 | 26 | 28 | 15 | 33  | 28  | 33  | 47  | 40  | 41  |
| SMMPA03864 | 12 | 23 | 16 | 38  | 43  | 42  | 45  | 56  | 55  |
| SMMPA03865 | 26 | 31 | 30 | 45  | 33  | 52  | 51  | 57  | 53  |
| SMMPA03866 | 24 | 32 | 18 | 89  | 75  | 71  | 52  | 55  | 55  |
| SMMPA03867 | 26 | 31 | 21 | 65  | 59  | 75  | 38  | 46  | 60  |
| SMMPA03868 | 17 | 22 | 24 | 68  | 43  | 46  | 40  | 53  | 52  |
| SMMPA03869 | 10 | 13 | 7  | 26  | 26  | 19  | 19  | 24  | 23  |
| SMMPA03870 | 9  | 11 | 5  | 30  | 42  | 33  | 17  | 23  | 28  |
| SMMPA03871 | 17 | 22 | 18 | 77  | 58  | 51  | 35  | 39  | 59  |
| SMMPA03872 | 12 | 9  | 8  | 44  | 53  | 38  | 20  | 40  | 27  |
| SMMPA03873 | 25 | 24 | 19 | 76  | 76  | 48  | 35  | 61  | 45  |
| SMMPA03874 | 16 | 18 | 17 | 32  | 26  | 29  | 31  | 42  | 47  |
| SMMPA03875 | 25 | 34 | 14 | 36  | 43  | 36  | 33  | 31  | 30  |
| SMMPA03876 | 34 | 39 | 33 | 35  | 55  | 29  | 30  | 37  | 53  |
| SMMPA03877 | 16 | 22 | 15 | 18  | 19  | 13  | 14  | 32  | 18  |
| SMMPA03878 | 26 | 34 | 24 | 22  | 26  | 22  | 18  | 38  | 30  |
| SMMPA03879 | 21 | 13 | 22 | 23  | 24  | 22  | 21  | 25  | 22  |
| SMMPA03880 | 18 | 21 | 16 | 26  | 22  | 17  | 26  | 28  | 25  |
| SMMPA03881 | 20 | 15 | 20 | 23  | 17  | 12  | 15  | 36  | 34  |
| SMMPA03882 | 29 | 27 | 24 | 35  | 28  | 31  | 27  | 42  | 32  |
| SMMPA03883 | 23 | 35 | 27 | 33  | 33  | 42  | 36  | 49  | 32  |
| SMMPA03884 | 31 | 19 | 25 | 27  | 37  | 29  | 34  | 39  | 35  |
| SMMPA03885 | 18 | 16 | 20 | 23  | 18  | 18  | 27  | 24  | 30  |
| SMMPA03886 | 42 | 21 | 26 | 17  | 20  | 20  | 27  | 47  | 49  |
| SMMPA03887 | 12 | 10 | 13 | 12  | 21  | 19  | 17  | 17  | 31  |
| SMMPA03888 | 20 | 27 | 24 | 128 | 98  | 93  | 60  | 60  | 56  |
| SMMPA03889 | 19 | 34 | 33 | 128 | 111 | 88  | 92  | 126 | 126 |
| SMMPA03890 | 26 | 25 | 28 | 333 | 319 | 260 | 124 | 174 | 160 |
| SMMPA03891 | 29 | 20 | 23 | 111 | 129 | 98  | 72  | 99  | 105 |
| SMMPA03892 | 26 | 35 | 25 | 64  | 76  | 39  | 39  | 62  | 53  |
| SMMPA03893 | 22 | 28 | 14 | 66  | 56  | 46  | 35  | 47  | 47  |
| SMMPA03894 | 33 | 27 | 23 | 56  | 44  | 35  | 27  | 43  | 49  |
| SMMPA03895 | 12 | 20 | 22 | 25  | 22  | 24  | 25  | 41  | 30  |
| SMMPA03896 | 41 | 50 | 38 | 223 | 225 | 168 | 121 | 183 | 161 |
| SMMPA03897 | 18 | 22 | 21 | 79  | 59  | 66  | 56  | 61  | 56  |
| SMMPA03898 | 21 | 25 | 28 | 37  | 28  | 21  | 34  | 33  | 47  |



|            |    |    |    |     |     |     |     |     |     |
|------------|----|----|----|-----|-----|-----|-----|-----|-----|
| SMMPA03899 | 19 | 18 | 26 | 34  | 22  | 16  | 20  | 25  | 33  |
| SMMPA03900 | 24 | 38 | 31 | 68  | 54  | 51  | 43  | 58  | 57  |
| SMMPA03901 | 17 | 18 | 16 | 40  | 29  | 30  | 27  | 36  | 42  |
| SMMPA03902 | 46 | 62 | 46 | 57  | 45  | 39  | 43  | 73  | 61  |
| SMMPA03903 | 31 | 32 | 30 | 49  | 67  | 44  | 52  | 80  | 77  |
| SMMPA03904 | 13 | 15 | 10 | 19  | 16  | 10  | 22  | 23  | 23  |
| SMMPA03905 | 14 | 29 | 21 | 50  | 31  | 33  | 32  | 59  | 30  |
| SMMPA03906 | 18 | 13 | 16 | 30  | 22  | 26  | 31  | 49  | 50  |
| SMMPA03907 | 10 | 19 | 20 | 36  | 44  | 26  | 35  | 38  | 34  |
| SMMPA03908 | 2  | 10 | 15 | 21  | 26  | 20  | 20  | 17  | 18  |
| SMMPA03909 | 7  | 15 | 10 | 54  | 54  | 41  | 29  | 42  | 32  |
| SMMPA03910 | 17 | 22 | 16 | 35  | 28  | 36  | 24  | 40  | 21  |
| SMMPA03911 | 7  | 2  | 6  | 14  | 17  | 20  | 8   | 13  | 12  |
| SMMPA03912 | 5  | 1  | 2  | 6   | 6   | 7   | 2   | 5   | 3   |
| SMMPA03913 | 12 | 21 | 14 | 15  | 14  | 9   | 17  | 18  | 20  |
| SMMPA03914 | 19 | 15 | 14 | 13  | 13  | 17  | 13  | 20  | 12  |
| SMMPA03915 | 4  | 6  | 3  | 6   | 3   | 4   | 2   | 4   | 3   |
| SMMPA03916 | 22 | 17 | 12 | 35  | 34  | 22  | 21  | 26  | 25  |
| SMMPA03917 | 16 | 9  | 9  | 32  | 23  | 16  | 20  | 22  | 17  |
| SMMPA03918 | 38 | 44 | 42 | 366 | 317 | 253 | 169 | 253 | 201 |
| SMMPA03919 | 27 | 23 | 14 | 65  | 57  | 40  | 44  | 51  | 35  |
| SMMPA03920 | 29 | 28 | 31 | 69  | 64  | 53  | 53  | 52  | 61  |
| SMMPA03921 | 26 | 25 | 39 | 30  | 42  | 21  | 33  | 49  | 42  |
| SMMPA03922 | 31 | 31 | 23 | 83  | 79  | 53  | 37  | 52  | 53  |
| SMMPA03923 | 10 | 11 | 22 | 36  | 44  | 34  | 31  | 32  | 30  |
| SMMPA03924 | 13 | 14 | 10 | 43  | 41  | 29  | 35  | 37  | 39  |
| SMMPA03925 | 5  | 9  | 10 | 98  | 112 | 86  | 40  | 46  | 35  |
| SMMPA03926 | 17 | 12 | 11 | 123 | 129 | 87  | 43  | 69  | 56  |
| SMMPA03927 | 22 | 16 | 21 | 54  | 33  | 42  | 31  | 35  | 39  |
| SMMPA03928 | 5  | 13 | 5  | 24  | 47  | 21  | 22  | 35  | 34  |
| SMMPA03929 | 6  | 15 | 6  | 15  | 17  | 12  | 10  | 13  | 6   |
| SMMPA03930 | 20 | 23 | 15 | 244 | 243 | 209 | 91  | 88  | 82  |
| SMMPA03931 | 26 | 32 | 27 | 17  | 19  | 17  | 18  | 19  | 33  |
| SMMPA03932 | 16 | 9  | 11 | 92  | 79  | 72  | 31  | 46  | 27  |
| SMMPA03933 | 20 | 16 | 17 | 19  | 18  | 21  | 8   | 15  | 20  |
| SMMPA03934 | 31 | 12 | 17 | 151 | 141 | 108 | 82  | 103 | 91  |
| SMMPA03935 | 10 | 20 | 10 | 85  | 75  | 60  | 53  | 69  | 48  |
| SMMPA03936 | 10 | 3  | 7  | 28  | 29  | 14  | 19  | 31  | 16  |
| SMMPA03937 | 27 | 18 | 17 | 102 | 83  | 67  | 48  | 72  | 64  |
| SMMPA03938 | 26 | 19 | 9  | 89  | 66  | 45  | 35  | 72  | 62  |
| SMMPA03939 | 1  | 0  | 0  | 2   | 7   | 2   | 0   | 1   | 0   |

|            |    |    |    |     |     |     |     |     |     |
|------------|----|----|----|-----|-----|-----|-----|-----|-----|
| SMMPA03940 | 14 | 22 | 16 | 90  | 76  | 70  | 30  | 38  | 49  |
| SMMPA03941 | 14 | 22 | 16 | 74  | 71  | 46  | 37  | 47  | 47  |
| SMMPA03942 | 18 | 21 | 16 | 46  | 35  | 44  | 51  | 38  | 64  |
| SMMPA03943 | 17 | 18 | 15 | 73  | 47  | 46  | 34  | 35  | 28  |
| SMMPA03944 | 11 | 7  | 12 | 17  | 18  | 15  | 10  | 21  | 19  |
| SMMPA03945 | 16 | 10 | 8  | 129 | 97  | 82  | 62  | 70  | 84  |
| SMMPA03946 | 27 | 24 | 34 | 73  | 60  | 53  | 54  | 53  | 77  |
| SMMPA03947 | 22 | 25 | 27 | 34  | 35  | 22  | 40  | 39  | 27  |
| SMMPA03948 | 22 | 21 | 12 | 27  | 22  | 24  | 33  | 25  | 29  |
| SMMPA03949 | 28 | 19 | 15 | 40  | 40  | 33  | 42  | 44  | 47  |
| SMMPA03950 | 15 | 21 | 19 | 36  | 17  | 14  | 26  | 44  | 48  |
| SMMPA03951 | 9  | 11 | 17 | 26  | 11  | 21  | 21  | 16  | 18  |
| SMMPA03952 | 7  | 8  | 6  | 20  | 28  | 18  | 3   | 14  | 8   |
| SMMPA03953 | 16 | 18 | 27 | 23  | 31  | 38  | 29  | 46  | 31  |
| SMMPA03954 | 30 | 31 | 23 | 31  | 19  | 22  | 22  | 31  | 40  |
| SMMPA03955 | 31 | 29 | 25 | 33  | 31  | 24  | 36  | 40  | 44  |
| SMMPA03956 | 20 | 16 | 14 | 28  | 29  | 21  | 19  | 17  | 24  |
| SMMPA03957 | 14 | 14 | 13 | 10  | 13  | 16  | 12  | 15  | 17  |
| SMMPA03958 | 20 | 21 | 15 | 19  | 13  | 18  | 24  | 23  | 24  |
| SMMPA03959 | 6  | 9  | 12 | 18  | 8   | 7   | 7   | 13  | 12  |
| SMMPA03960 | 65 | 38 | 53 | 34  | 37  | 44  | 32  | 45  | 52  |
| SMMPA03961 | 31 | 28 | 27 | 100 | 82  | 78  | 58  | 92  | 97  |
| SMMPA03962 | 24 | 25 | 13 | 68  | 63  | 47  | 59  | 60  | 56  |
| SMMPA03963 | 21 | 24 | 29 | 91  | 82  | 70  | 64  | 77  | 69  |
| SMMPA03964 | 8  | 4  | 16 | 25  | 19  | 23  | 14  | 17  | 24  |
| SMMPA03965 | 7  | 4  | 8  | 25  | 17  | 17  | 21  | 29  | 13  |
| SMMPA03966 | 12 | 11 | 6  | 29  | 19  | 13  | 30  | 28  | 28  |
| SMMPA03967 | 20 | 22 | 18 | 129 | 95  | 69  | 63  | 70  | 78  |
| SMMPA03968 | 33 | 28 | 28 | 62  | 48  | 39  | 45  | 74  | 90  |
| SMMPA03969 | 27 | 23 | 20 | 69  | 73  | 65  | 66  | 70  | 88  |
| SMMPA03970 | 15 | 14 | 9  | 23  | 38  | 22  | 18  | 34  | 23  |
| SMMPA03971 | 14 | 13 | 14 | 46  | 56  | 37  | 22  | 32  | 19  |
| SMMPA03972 | 11 | 10 | 9  | 31  | 26  | 22  | 14  | 24  | 18  |
| SMMPA03973 | 24 | 29 | 30 | 163 | 178 | 152 | 78  | 91  | 85  |
| SMMPA03974 | 18 | 14 | 13 | 22  | 27  | 20  | 10  | 31  | 19  |
| SMMPA03975 | 14 | 11 | 9  | 20  | 18  | 17  | 25  | 23  | 22  |
| SMMPA03976 | 23 | 24 | 14 | 426 | 367 | 306 | 140 | 201 | 185 |
| SMMPA03977 | 7  | 10 | 7  | 50  | 62  | 51  | 31  | 33  | 42  |
| SMMPA03978 | 12 | 14 | 13 | 29  | 33  | 23  | 27  | 21  | 18  |
| SMMPA03979 | 12 | 19 | 20 | 40  | 50  | 33  | 17  | 25  | 34  |
| SMMPA03980 | 12 | 19 | 17 | 232 | 203 | 156 | 92  | 124 | 119 |

|            |    |    |    |     |     |     |    |    |    |
|------------|----|----|----|-----|-----|-----|----|----|----|
| SMMPA03981 | 15 | 34 | 20 | 151 | 140 | 112 | 53 | 71 | 69 |
| SMMPA03982 | 14 | 8  | 12 | 40  | 46  | 34  | 20 | 31 | 28 |
| SMMPA03983 | 26 | 14 | 21 | 37  | 34  | 25  | 28 | 41 | 33 |
| SMMPA03984 | 13 | 14 | 16 | 142 | 120 | 114 | 84 | 75 | 83 |
| SMMPA03985 | 12 | 19 | 12 | 46  | 37  | 32  | 25 | 30 | 36 |
| SMMPA03986 | 10 | 4  | 5  | 20  | 31  | 21  | 8  | 21 | 10 |
| SMMPA03987 | 12 | 15 | 10 | 52  | 42  | 37  | 22 | 48 | 34 |
| SMMPA03988 | 6  | 9  | 8  | 31  | 37  | 26  | 12 | 19 | 23 |
| SMMPA03989 | 8  | 11 | 11 | 37  | 34  | 35  | 36 | 40 | 36 |
| SMMPA03990 | 7  | 7  | 6  | 21  | 16  | 18  | 17 | 17 | 10 |
| SMMPA03991 | 12 | 7  | 7  | 21  | 12  | 24  | 17 | 20 | 16 |
| SMMPA03992 | 8  | 7  | 9  | 26  | 19  | 21  | 9  | 16 | 26 |
| SMMPA03993 | 22 | 15 | 13 | 45  | 49  | 47  | 33 | 45 | 36 |
| SMMPA03994 | 16 | 18 | 15 | 109 | 111 | 102 | 51 | 68 | 45 |
| SMMPA03995 | 33 | 29 | 25 | 35  | 32  | 31  | 34 | 43 | 37 |
| SMMPA03996 | 20 | 19 | 10 | 17  | 22  | 26  | 17 | 26 | 26 |
| SMMPA03997 | 16 | 28 | 20 | 31  | 24  | 20  | 22 | 32 | 26 |
| SMMPA03998 | 7  | 15 | 21 | 30  | 29  | 24  | 16 | 19 | 29 |
| SMMPA03999 | 16 | 23 | 17 | 43  | 34  | 39  | 21 | 22 | 36 |
| SMMPA04000 | 16 | 18 | 9  | 23  | 23  | 26  | 13 | 17 | 18 |
| SMMPA04001 | 16 | 15 | 9  | 31  | 28  | 37  | 18 | 31 | 23 |
| SMMPA04002 | 43 | 32 | 27 | 82  | 60  | 63  | 40 | 54 | 69 |
| SMMPA04003 | 10 | 13 | 10 | 16  | 14  | 10  | 27 | 23 | 25 |
| SMMPA04004 | 11 | 7  | 4  | 6   | 4   | 10  | 8  | 14 | 6  |
| SMMPA04005 | 4  | 4  | 8  | 29  | 28  | 32  | 36 | 44 | 38 |
| SMMPA04006 | 22 | 28 | 27 | 35  | 30  | 34  | 38 | 46 | 51 |
| SMMPA04007 | 24 | 19 | 14 | 40  | 23  | 22  | 32 | 46 | 25 |
| SMMPA04008 | 20 | 15 | 21 | 56  | 54  | 47  | 31 | 31 | 52 |
| SMMPA04009 | 5  | 10 | 14 | 20  | 19  | 7   | 10 | 18 | 19 |
| SMMPA04010 | 14 | 12 | 6  | 24  | 17  | 14  | 13 | 18 | 12 |
| SMMPA04011 | 13 | 8  | 14 | 11  | 14  | 17  | 34 | 34 | 42 |
| SMMPA04012 | 18 | 19 | 21 | 28  | 38  | 35  | 49 | 58 | 40 |
| SMMPA04013 | 13 | 23 | 12 | 16  | 17  | 23  | 20 | 21 | 29 |
| SMMPA04014 | 13 | 8  | 10 | 31  | 33  | 22  | 20 | 21 | 25 |
| SMMPA04015 | 22 | 14 | 28 | 34  | 42  | 32  | 58 | 57 | 68 |
| SMMPA04016 | 12 | 18 | 14 | 25  | 22  | 24  | 25 | 43 | 38 |
| SMMPA04017 | 29 | 38 | 32 | 34  | 24  | 28  | 47 | 48 | 54 |
| SMMPA04018 | 18 | 23 | 13 | 75  | 71  | 64  | 36 | 48 | 43 |
| SMMPA04019 | 19 | 12 | 8  | 21  | 27  | 27  | 19 | 30 | 34 |
| SMMPA04020 | 23 | 31 | 24 | 49  | 32  | 28  | 33 | 56 | 45 |
| SMMPA04021 | 17 | 23 | 15 | 44  | 54  | 31  | 25 | 33 | 34 |

|            |    |    |    |     |     |    |    |    |    |
|------------|----|----|----|-----|-----|----|----|----|----|
| SMMPA04022 | 20 | 23 | 18 | 8   | 10  | 13 | 18 | 29 | 14 |
| SMMPA04023 | 21 | 19 | 16 | 51  | 69  | 46 | 46 | 60 | 54 |
| SMMPA04024 | 17 | 7  | 9  | 20  | 17  | 13 | 19 | 23 | 22 |
| SMMPA04025 | 19 | 19 | 16 | 41  | 50  | 37 | 54 | 50 | 61 |
| SMMPA04026 | 27 | 33 | 13 | 25  | 23  | 14 | 23 | 30 | 33 |
| SMMPA04027 | 24 | 17 | 23 | 39  | 41  | 31 | 44 | 45 | 48 |
| SMMPA04028 | 5  | 6  | 7  | 7   | 8   | 14 | 8  | 20 | 18 |
| SMMPA04029 | 9  | 16 | 11 | 12  | 9   | 15 | 12 | 21 | 14 |
| SMMPA04030 | 10 | 22 | 16 | 37  | 38  | 30 | 32 | 44 | 41 |
| SMMPA04031 | 35 | 51 | 35 | 65  | 65  | 53 | 40 | 41 | 52 |
| SMMPA04032 | 11 | 13 | 13 | 73  | 62  | 71 | 45 | 58 | 59 |
| SMMPA04033 | 15 | 19 | 16 | 33  | 41  | 23 | 37 | 40 | 49 |
| SMMPA04034 | 41 | 34 | 42 | 105 | 79  | 67 | 58 | 64 | 61 |
| SMMPA04035 | 12 | 9  | 15 | 14  | 16  | 17 | 16 | 23 | 26 |
| SMMPA04036 | 30 | 25 | 27 | 33  | 37  | 26 | 33 | 48 | 53 |
| SMMPA04037 | 28 | 31 | 26 | 37  | 20  | 21 | 30 | 36 | 42 |
| SMMPA04038 | 25 | 29 | 22 | 19  | 14  | 20 | 16 | 27 | 24 |
| SMMPA04039 | 28 | 54 | 34 | 42  | 40  | 36 | 57 | 49 | 81 |
| SMMPA04040 | 28 | 37 | 19 | 60  | 54  | 42 | 41 | 52 | 37 |
| SMMPA04041 | 17 | 20 | 10 | 23  | 14  | 24 | 22 | 23 | 27 |
| SMMPA04042 | 8  | 11 | 11 | 38  | 46  | 24 | 27 | 26 | 24 |
| SMMPA04043 | 12 | 8  | 9  | 11  | 14  | 4  | 14 | 17 | 16 |
| SMMPA04044 | 8  | 4  | 4  | 22  | 18  | 16 | 21 | 20 | 20 |
| SMMPA04045 | 27 | 29 | 42 | 60  | 75  | 50 | 29 | 59 | 63 |
| SMMPA04046 | 50 | 49 | 46 | 137 | 119 | 92 | 64 | 97 | 98 |
| SMMPA04047 | 43 | 36 | 49 | 51  | 56  | 41 | 33 | 54 | 42 |
| SMMPA04048 | 17 | 16 | 18 | 28  | 35  | 33 | 18 | 20 | 18 |
| SMMPA04049 | 15 | 20 | 19 | 31  | 30  | 28 | 36 | 27 | 33 |
| SMMPA04050 | 11 | 9  | 10 | 9   | 10  | 5  | 10 | 14 | 9  |
| SMMPA04051 | 8  | 12 | 6  | 8   | 6   | 8  | 10 | 11 | 12 |
| SMMPA04052 | 6  | 7  | 5  | 12  | 10  | 15 | 7  | 8  | 10 |
| SMMPA04053 | 18 | 17 | 11 | 27  | 42  | 34 | 42 | 39 | 36 |
| SMMPA04054 | 14 | 14 | 8  | 18  | 16  | 17 | 15 | 16 | 17 |
| SMMPA04055 | 17 | 17 | 21 | 33  | 30  | 33 | 25 | 39 | 23 |
| SMMPA04056 | 8  | 4  | 6  | 35  | 29  | 27 | 18 | 11 | 18 |
| SMMPA04057 | 1  | 0  | 2  | 5   | 2   | 2  | 5  | 2  | 4  |
| SMMPA04058 | 1  | 0  | 2  | 3   | 4   | 1  | 6  | 5  | 7  |
| SMMPA04059 | 3  | 5  | 3  | 10  | 13  | 7  | 9  | 12 | 7  |
| SMMPA04060 | 7  | 7  | 15 | 167 | 81  | 80 | 75 | 92 | 79 |
| SMMPA04061 | 2  | 2  | 6  | 14  | 18  | 9  | 8  | 12 | 12 |
| SMMPA04062 | 11 | 4  | 7  | 131 | 88  | 71 | 71 | 98 | 72 |

|            |    |    |    |     |     |     |     |     |     |
|------------|----|----|----|-----|-----|-----|-----|-----|-----|
| SMMPA04063 | 1  | 4  | 7  | 25  | 16  | 6   | 5   | 18  | 21  |
| SMMPA04064 | 5  | 1  | 8  | 10  | 6   | 8   | 10  | 12  | 19  |
| SMMPA04065 | 14 | 9  | 8  | 68  | 34  | 34  | 26  | 43  | 32  |
| SMMPA04066 | 7  | 3  | 4  | 42  | 23  | 16  | 21  | 22  | 18  |
| SMMPA04067 | 17 | 20 | 22 | 96  | 82  | 54  | 67  | 66  | 55  |
| SMMPA04068 | 25 | 27 | 35 | 150 | 165 | 115 | 75  | 114 | 94  |
| SMMPA04069 | 14 | 25 | 19 | 147 | 151 | 98  | 57  | 71  | 58  |
| SMMPA04070 | 22 | 38 | 34 | 263 | 200 | 185 | 101 | 122 | 111 |
| SMMPA04071 | 34 | 30 | 22 | 54  | 42  | 37  | 35  | 44  | 37  |
| SMMPA04072 | 14 | 13 | 16 | 74  | 61  | 45  | 28  | 54  | 61  |
| SMMPA04073 | 25 | 20 | 17 | 168 | 149 | 116 | 94  | 102 | 89  |
| SMMPA04074 | 14 | 14 | 10 | 42  | 50  | 39  | 36  | 34  | 38  |
| SMMPA04075 | 17 | 32 | 24 | 134 | 113 | 108 | 93  | 161 | 118 |
| SMMPA04076 | 32 | 27 | 22 | 84  | 99  | 75  | 50  | 61  | 70  |
| SMMPA04077 | 40 | 44 | 40 | 164 | 158 | 113 | 89  | 148 | 118 |
| SMMPA04078 | 8  | 10 | 7  | 18  | 20  | 21  | 10  | 23  | 15  |
| SMMPA04079 | 31 | 24 | 34 | 289 | 242 | 178 | 119 | 168 | 157 |
| SMMPA04080 | 13 | 13 | 13 | 26  | 17  | 32  | 22  | 27  | 27  |
| SMMPA04081 | 25 | 24 | 21 | 55  | 54  | 46  | 40  | 42  | 39  |
| SMMPA04082 | 18 | 20 | 19 | 87  | 65  | 50  | 38  | 36  | 33  |
| SMMPA04083 | 21 | 28 | 28 | 134 | 143 | 94  | 40  | 50  | 49  |
| SMMPA04084 | 21 | 28 | 15 | 27  | 25  | 29  | 11  | 24  | 22  |
| SMMPA04085 | 15 | 16 | 15 | 35  | 32  | 21  | 20  | 28  | 32  |
| SMMPA04086 | 18 | 16 | 15 | 22  | 26  | 15  | 28  | 37  | 29  |
| SMMPA04087 | 5  | 8  | 7  | 11  | 12  | 6   | 13  | 21  | 7   |
| SMMPA04088 | 11 | 15 | 13 | 22  | 33  | 21  | 23  | 32  | 35  |
| SMMPA04089 | 23 | 19 | 19 | 124 | 123 | 118 | 17  | 46  | 29  |
| SMMPA04090 | 23 | 11 | 16 | 60  | 61  | 64  | 22  | 26  | 30  |
| SMMPA04091 | 13 | 14 | 12 | 34  | 22  | 22  | 26  | 33  | 32  |
| SMMPA04092 | 15 | 20 | 25 | 36  | 32  | 31  | 25  | 38  | 32  |
| SMMPA04093 | 16 | 13 | 19 | 19  | 22  | 17  | 19  | 19  | 22  |
| SMMPA04094 | 16 | 15 | 15 | 41  | 33  | 31  | 17  | 29  | 32  |
| SMMPA04095 | 22 | 21 | 27 | 21  | 26  | 23  | 27  | 36  | 31  |
| SMMPA04096 | 36 | 29 | 27 | 61  | 54  | 40  | 40  | 45  | 41  |
| SMMPA04097 | 14 | 14 | 13 | 21  | 20  | 20  | 14  | 16  | 25  |
| SMMPA04098 | 28 | 26 | 30 | 38  | 38  | 36  | 37  | 39  | 47  |
| SMMPA04099 | 18 | 19 | 12 | 22  | 19  | 18  | 14  | 18  | 17  |
| SMMPA04100 | 20 | 27 | 21 | 24  | 24  | 19  | 18  | 28  | 25  |
| SMMPA04101 | 11 | 8  | 11 | 14  | 9   | 14  | 20  | 14  | 12  |
| SMMPA04102 | 18 | 11 | 20 | 35  | 37  | 25  | 18  | 6   | 24  |
| SMMPA04103 | 17 | 16 | 15 | 20  | 17  | 7   | 24  | 29  | 31  |

|            |     |    |    |     |     |     |     |     |     |
|------------|-----|----|----|-----|-----|-----|-----|-----|-----|
| SMMPA04104 | 6   | 5  | 6  | 16  | 27  | 16  | 14  | 18  | 9   |
| SMMPA04105 | 17  | 24 | 17 | 88  | 86  | 75  | 40  | 55  | 47  |
| SMMPA04106 | 11  | 13 | 10 | 67  | 59  | 61  | 39  | 39  | 25  |
| SMMPA04107 | 20  | 20 | 14 | 109 | 95  | 62  | 34  | 58  | 65  |
| SMMPA04108 | 24  | 22 | 26 | 163 | 170 | 122 | 56  | 72  | 86  |
| SMMPA04109 | 13  | 22 | 15 | 38  | 35  | 23  | 22  | 37  | 23  |
| SMMPA04110 | 27  | 23 | 30 | 72  | 96  | 61  | 63  | 64  | 66  |
| SMMPA04111 | 101 | 89 | 80 | 108 | 98  | 86  | 70  | 90  | 87  |
| SMMPA04112 | 27  | 22 | 31 | 89  | 68  | 69  | 58  | 63  | 74  |
| SMMPA04113 | 14  | 29 | 14 | 33  | 35  | 26  | 23  | 27  | 30  |
| SMMPA04114 | 40  | 29 | 17 | 34  | 42  | 27  | 21  | 24  | 33  |
| SMMPA04115 | 24  | 24 | 16 | 39  | 28  | 14  | 22  | 37  | 37  |
| SMMPA04116 | 21  | 28 | 17 | 60  | 43  | 42  | 30  | 28  | 49  |
| SMMPA04117 | 12  | 17 | 10 | 38  | 29  | 39  | 25  | 18  | 30  |
| SMMPA04118 | 14  | 19 | 23 | 52  | 52  | 53  | 56  | 61  | 60  |
| SMMPA04119 | 27  | 19 | 26 | 19  | 13  | 18  | 23  | 24  | 20  |
| SMMPA04120 | 8   | 8  | 7  | 13  | 6   | 11  | 7   | 13  | 15  |
| SMMPA04121 | 28  | 37 | 28 | 40  | 33  | 26  | 46  | 53  | 46  |
| SMMPA04122 | 39  | 38 | 32 | 57  | 53  | 57  | 39  | 47  | 47  |
| SMMPA04123 | 12  | 14 | 5  | 15  | 14  | 11  | 16  | 19  | 19  |
| SMMPA04124 | 46  | 46 | 34 | 43  | 41  | 34  | 32  | 52  | 56  |
| SMMPA04125 | 25  | 23 | 23 | 31  | 35  | 28  | 23  | 32  | 23  |
| SMMPA04126 | 25  | 16 | 23 | 28  | 21  | 32  | 30  | 33  | 41  |
| SMMPA04127 | 27  | 34 | 36 | 29  | 21  | 22  | 49  | 54  | 31  |
| SMMPA04128 | 1   | 4  | 3  | 1   | 3   | 4   | 7   | 7   | 4   |
| SMMPA04129 | 12  | 13 | 8  | 20  | 23  | 23  | 10  | 15  | 20  |
| SMMPA04130 | 11  | 20 | 13 | 21  | 19  | 25  | 24  | 21  | 21  |
| SMMPA04131 | 3   | 10 | 6  | 2   | 1   | 1   | 4   | 9   | 6   |
| SMMPA04132 | 6   | 9  | 9  | 11  | 16  | 9   | 9   | 9   | 16  |
| SMMPA04133 | 4   | 9  | 2  | 16  | 6   | 14  | 5   | 9   | 15  |
| SMMPA04134 | 1   | 2  | 3  | 4   | 17  | 11  | 1   | 7   | 4   |
| SMMPA04135 | 11  | 14 | 28 | 20  | 28  | 24  | 13  | 27  | 25  |
| SMMPA04136 | 11  | 20 | 21 | 27  | 27  | 23  | 20  | 19  | 25  |
| SMMPA04137 | 2   | 7  | 8  | 22  | 21  | 11  | 17  | 14  | 10  |
| SMMPA04138 | 27  | 37 | 23 | 232 | 192 | 151 | 106 | 160 | 144 |
| SMMPA04139 | 13  | 15 | 12 | 80  | 77  | 69  | 52  | 68  | 54  |
| SMMPA04140 | 14  | 12 | 12 | 74  | 48  | 34  | 41  | 62  | 29  |
| SMMPA04141 | 42  | 37 | 42 | 52  | 41  | 37  | 55  | 56  | 52  |
| SMMPA04142 | 16  | 5  | 4  | 14  | 24  | 4   | 11  | 10  | 17  |
| SMMPA04143 | 20  | 38 | 24 | 79  | 57  | 54  | 77  | 83  | 93  |
| SMMPA04144 | 12  | 12 | 8  | 25  | 12  | 17  | 7   | 13  | 14  |

|            |    |    |    |     |     |     |     |     |     |
|------------|----|----|----|-----|-----|-----|-----|-----|-----|
| SMMPA04145 | 24 | 21 | 11 | 161 | 123 | 101 | 53  | 73  | 54  |
| SMMPA04146 | 13 | 24 | 23 | 48  | 50  | 36  | 33  | 51  | 39  |
| SMMPA04147 | 17 | 27 | 25 | 146 | 130 | 97  | 49  | 58  | 55  |
| SMMPA04148 | 40 | 45 | 49 | 69  | 67  | 58  | 56  | 66  | 62  |
| SMMPA04149 | 24 | 19 | 25 | 87  | 64  | 53  | 46  | 48  | 64  |
| SMMPA04150 | 27 | 27 | 29 | 108 | 75  | 63  | 43  | 64  | 57  |
| SMMPA04151 | 32 | 33 | 27 | 71  | 84  | 69  | 56  | 54  | 55  |
| SMMPA04152 | 36 | 34 | 27 | 87  | 88  | 77  | 53  | 82  | 58  |
| SMMPA04153 | 9  | 18 | 13 | 37  | 54  | 48  | 26  | 37  | 29  |
| SMMPA04154 | 28 | 25 | 27 | 53  | 53  | 50  | 43  | 52  | 70  |
| SMMPA04155 | 23 | 30 | 20 | 56  | 50  | 31  | 30  | 46  | 44  |
| SMMPA04156 | 8  | 3  | 8  | 11  | 16  | 12  | 8   | 8   | 7   |
| SMMPA04157 | 6  | 7  | 9  | 94  | 96  | 75  | 46  | 49  | 43  |
| SMMPA04158 | 1  | 2  | 6  | 13  | 7   | 12  | 10  | 2   | 4   |
| SMMPA04159 | 8  | 11 | 9  | 87  | 100 | 73  | 44  | 45  | 42  |
| SMMPA04160 | 22 | 40 | 31 | 90  | 74  | 54  | 53  | 51  | 47  |
| SMMPA04161 | 17 | 10 | 6  | 165 | 203 | 182 | 57  | 66  | 74  |
| SMMPA04162 | 16 | 17 | 12 | 672 | 735 | 766 | 225 | 308 | 273 |
| SMMPA04163 | 13 | 5  | 5  | 57  | 76  | 56  | 25  | 32  | 26  |
| SMMPA04164 | 10 | 6  | 14 | 18  | 14  | 17  | 28  | 29  | 29  |
| SMMPA04165 | 12 | 15 | 14 | 50  | 37  | 31  | 34  | 34  | 17  |
| SMMPA04166 | 9  | 11 | 11 | 44  | 46  | 30  | 29  | 37  | 26  |
| SMMPA04167 | 23 | 17 | 24 | 324 | 299 | 254 | 135 | 162 | 138 |
| SMMPA04168 | 38 | 22 | 29 | 69  | 48  | 57  | 48  | 62  | 50  |
| SMMPA04169 | 52 | 44 | 48 | 250 | 197 | 176 | 114 | 135 | 130 |
| SMMPA04170 | 6  | 5  | 11 | 54  | 47  | 31  | 18  | 30  | 26  |
| SMMPA04171 | 53 | 63 | 48 | 780 | 721 | 656 | 259 | 371 | 319 |
| SMMPA04172 | 13 | 18 | 12 | 40  | 40  | 31  | 33  | 39  | 29  |
| SMMPA04173 | 18 | 21 | 9  | 72  | 46  | 47  | 34  | 46  | 44  |
| SMMPA04174 | 15 | 15 | 22 | 13  | 14  | 20  | 16  | 31  | 23  |
| SMMPA04175 | 13 | 22 | 9  | 9   | 11  | 15  | 15  | 22  | 22  |
| SMMPA04176 | 11 | 9  | 16 | 17  | 10  | 7   | 21  | 22  | 21  |
| SMMPA04177 | 15 | 23 | 10 | 22  | 21  | 17  | 22  | 28  | 28  |
| SMMPA04178 | 26 | 31 | 31 | 92  | 89  | 66  | 60  | 96  | 88  |
| SMMPA04179 | 14 | 25 | 27 | 88  | 76  | 82  | 43  | 67  | 50  |
| SMMPA04180 | 8  | 7  | 8  | 51  | 52  | 37  | 42  | 29  | 40  |
| SMMPA04181 | 14 | 14 | 13 | 19  | 21  | 24  | 25  | 15  | 18  |
| SMMPA04182 | 13 | 17 | 11 | 13  | 10  | 12  | 12  | 19  | 17  |
| SMMPA04183 | 30 | 29 | 22 | 41  | 22  | 49  | 31  | 47  | 48  |
| SMMPA04184 | 21 | 15 | 17 | 32  | 34  | 28  | 24  | 27  | 25  |
| SMMPA04185 | 16 | 27 | 17 | 23  | 19  | 20  | 12  | 26  | 18  |

|            |    |    |    |     |     |     |    |     |     |
|------------|----|----|----|-----|-----|-----|----|-----|-----|
| SMMPA04186 | 24 | 21 | 23 | 11  | 14  | 20  | 24 | 21  | 26  |
| SMMPA04187 | 20 | 26 | 20 | 23  | 27  | 23  | 33 | 34  | 38  |
| SMMPA04188 | 22 | 22 | 14 | 34  | 18  | 15  | 17 | 26  | 28  |
| SMMPA04189 | 22 | 29 | 22 | 27  | 36  | 27  | 27 | 24  | 36  |
| SMMPA04190 | 28 | 18 | 22 | 44  | 45  | 38  | 36 | 30  | 29  |
| SMMPA04191 | 34 | 35 | 24 | 51  | 53  | 39  | 32 | 51  | 43  |
| SMMPA04192 | 5  | 14 | 10 | 41  | 30  | 24  | 32 | 26  | 25  |
| SMMPA04193 | 36 | 32 | 45 | 39  | 63  | 30  | 47 | 54  | 66  |
| SMMPA04194 | 20 | 15 | 13 | 13  | 16  | 21  | 13 | 34  | 27  |
| SMMPA04195 | 14 | 17 | 17 | 15  | 15  | 8   | 8  | 21  | 20  |
| SMMPA04196 | 4  | 10 | 11 | 13  | 11  | 5   | 15 | 16  | 12  |
| SMMPA04197 | 23 | 25 | 18 | 22  | 33  | 23  | 27 | 25  | 22  |
| SMMPA04198 | 22 | 28 | 26 | 46  | 40  | 37  | 33 | 44  | 52  |
| SMMPA04199 | 16 | 11 | 7  | 15  | 11  | 13  | 15 | 17  | 18  |
| SMMPA04200 | 39 | 35 | 34 | 67  | 65  | 55  | 52 | 61  | 62  |
| SMMPA04201 | 12 | 15 | 11 | 98  | 59  | 67  | 33 | 52  | 57  |
| SMMPA04202 | 4  | 7  | 8  | 71  | 60  | 61  | 37 | 58  | 48  |
| SMMPA04203 | 20 | 16 | 16 | 65  | 50  | 50  | 22 | 47  | 34  |
| SMMPA04204 | 20 | 18 | 20 | 42  | 58  | 47  | 37 | 43  | 37  |
| SMMPA04205 | 19 | 19 | 15 | 28  | 33  | 39  | 24 | 26  | 21  |
| SMMPA04206 | 14 | 14 | 15 | 118 | 94  | 86  | 61 | 65  | 74  |
| SMMPA04207 | 17 | 14 | 20 | 111 | 101 | 88  | 37 | 66  | 57  |
| SMMPA04208 | 8  | 14 | 6  | 27  | 32  | 30  | 16 | 19  | 32  |
| SMMPA04209 | 12 | 18 | 12 | 13  | 21  | 9   | 18 | 18  | 15  |
| SMMPA04210 | 11 | 16 | 12 | 66  | 56  | 41  | 32 | 44  | 30  |
| SMMPA04211 | 21 | 22 | 22 | 55  | 49  | 61  | 48 | 66  | 61  |
| SMMPA04212 | 12 | 19 | 12 | 48  | 34  | 24  | 29 | 43  | 42  |
| SMMPA04213 | 14 | 14 | 9  | 9   | 12  | 13  | 18 | 24  | 25  |
| SMMPA04214 | 17 | 19 | 9  | 17  | 25  | 12  | 18 | 31  | 21  |
| SMMPA04215 | 62 | 63 | 74 | 50  | 46  | 46  | 43 | 66  | 67  |
| SMMPA04216 | 13 | 11 | 14 | 31  | 14  | 30  | 22 | 36  | 28  |
| SMMPA04217 | 38 | 31 | 29 | 36  | 31  | 33  | 47 | 47  | 62  |
| SMMPA04218 | 19 | 19 | 22 | 18  | 20  | 19  | 30 | 30  | 28  |
| SMMPA04219 | 20 | 20 | 27 | 272 | 233 | 191 | 80 | 150 | 118 |
| SMMPA04220 | 12 | 13 | 9  | 18  | 13  | 13  | 15 | 27  | 12  |
| SMMPA04221 | 37 | 40 | 23 | 52  | 56  | 60  | 33 | 44  | 48  |
| SMMPA04222 | 10 | 15 | 9  | 13  | 21  | 14  | 15 | 18  | 23  |
| SMMPA04223 | 33 | 25 | 19 | 32  | 17  | 30  | 24 | 30  | 38  |
| SMMPA04224 | 31 | 28 | 19 | 136 | 127 | 109 | 51 | 81  | 72  |
| SMMPA04225 | 22 | 25 | 32 | 32  | 20  | 25  | 26 | 34  | 36  |
| SMMPA04226 | 4  | 8  | 3  | 12  | 8   | 9   | 7  | 7   | 12  |



|            |    |    |    |     |     |     |     |     |     |
|------------|----|----|----|-----|-----|-----|-----|-----|-----|
| SMMPA04227 | 9  | 10 | 21 | 17  | 16  | 20  | 16  | 16  | 21  |
| SMMPA04228 | 24 | 17 | 21 | 29  | 10  | 25  | 41  | 46  | 52  |
| SMMPA04229 | 14 | 18 | 16 | 33  | 32  | 33  | 25  | 31  | 24  |
| SMMPA04230 | 24 | 22 | 22 | 23  | 20  | 16  | 24  | 37  | 21  |
| SMMPA04231 | 12 | 16 | 11 | 91  | 80  | 62  | 31  | 52  | 37  |
| SMMPA04232 | 19 | 22 | 21 | 64  | 77  | 55  | 31  | 35  | 42  |
| SMMPA04233 | 28 | 26 | 26 | 34  | 39  | 40  | 22  | 35  | 32  |
| SMMPA04234 | 54 | 55 | 55 | 120 | 106 | 91  | 60  | 79  | 77  |
| SMMPA04235 | 35 | 26 | 33 | 45  | 44  | 43  | 40  | 57  | 48  |
| SMMPA04236 | 49 | 48 | 41 | 63  | 73  | 56  | 52  | 57  | 81  |
| SMMPA04237 | 24 | 29 | 23 | 176 | 146 | 101 | 74  | 95  | 82  |
| SMMPA04238 | 11 | 15 | 10 | 61  | 48  | 45  | 36  | 42  | 26  |
| SMMPA04239 | 47 | 46 | 50 | 124 | 106 | 66  | 68  | 73  | 75  |
| SMMPA04240 | 13 | 15 | 8  | 9   | 8   | 11  | 12  | 19  | 10  |
| SMMPA04241 | 8  | 13 | 10 | 18  | 16  | 20  | 10  | 14  | 21  |
| SMMPA04242 | 48 | 43 | 40 | 43  | 34  | 26  | 45  | 61  | 53  |
| SMMPA04243 | 26 | 25 | 19 | 89  | 93  | 71  | 62  | 65  | 66  |
| SMMPA04244 | 35 | 25 | 25 | 85  | 88  | 60  | 61  | 76  | 66  |
| SMMPA04245 | 16 | 20 | 13 | 71  | 69  | 63  | 36  | 42  | 64  |
| SMMPA04246 | 43 | 46 | 41 | 87  | 83  | 66  | 80  | 98  | 88  |
| SMMPA04247 | 23 | 36 | 23 | 204 | 189 | 148 | 102 | 173 | 137 |
| SMMPA04248 | 17 | 10 | 3  | 11  | 8   | 6   | 10  | 15  | 10  |
| SMMPA04249 | 27 | 22 | 17 | 314 | 268 | 204 | 186 | 238 | 232 |
| SMMPA04250 | 16 | 27 | 18 | 130 | 112 | 80  | 32  | 39  | 49  |
| SMMPA04251 | 16 | 28 | 17 | 38  | 48  | 36  | 39  | 33  | 38  |
| SMMPA04252 | 27 | 28 | 26 | 33  | 40  | 21  | 35  | 39  | 36  |
| SMMPA04253 | 10 | 14 | 11 | 28  | 40  | 25  | 19  | 29  | 25  |
| SMMPA04254 | 23 | 23 | 15 | 50  | 52  | 31  | 34  | 37  | 46  |
| SMMPA04255 | 31 | 28 | 30 | 84  | 64  | 56  | 53  | 60  | 54  |
| SMMPA04256 | 13 | 16 | 7  | 95  | 66  | 49  | 31  | 49  | 45  |
| SMMPA04257 | 28 | 47 | 30 | 83  | 74  | 71  | 71  | 73  | 81  |
| SMMPA04258 | 19 | 32 | 23 | 38  | 32  | 28  | 17  | 20  | 26  |
| SMMPA04259 | 25 | 23 | 29 | 39  | 31  | 34  | 37  | 53  | 38  |
| SMMPA04260 | 27 | 29 | 26 | 168 | 154 | 132 | 73  | 104 | 72  |
| SMMPA04261 | 24 | 31 | 17 | 79  | 78  | 68  | 52  | 78  | 71  |
| SMMPA04262 | 17 | 19 | 23 | 40  | 37  | 27  | 58  | 70  | 57  |
| SMMPA04263 | 29 | 25 | 24 | 79  | 90  | 80  | 65  | 108 | 102 |
| SMMPA04264 | 11 | 21 | 22 | 58  | 55  | 44  | 25  | 27  | 43  |
| SMMPA04265 | 31 | 26 | 22 | 184 | 146 | 131 | 62  | 96  | 79  |
| SMMPA04266 | 38 | 46 | 49 | 146 | 159 | 108 | 95  | 120 | 97  |
| SMMPA04267 | 11 | 8  | 11 | 22  | 34  | 14  | 10  | 17  | 21  |

|            |    |    |    |     |     |     |     |     |     |
|------------|----|----|----|-----|-----|-----|-----|-----|-----|
| SMMPA04268 | 26 | 33 | 29 | 196 | 159 | 118 | 96  | 119 | 118 |
| SMMPA04269 | 22 | 19 | 23 | 49  | 54  | 30  | 57  | 58  | 57  |
| SMMPA04270 | 16 | 19 | 10 | 46  | 48  | 34  | 30  | 29  | 28  |
| SMMPA04271 | 21 | 26 | 27 | 38  | 49  | 43  | 25  | 27  | 26  |
| SMMPA04272 | 45 | 56 | 32 | 120 | 94  | 78  | 68  | 61  | 75  |
| SMMPA04273 | 23 | 22 | 13 | 48  | 47  | 33  | 28  | 59  | 37  |
| SMMPA04274 | 24 | 29 | 27 | 113 | 85  | 71  | 27  | 54  | 50  |
| SMMPA04275 | 11 | 10 | 7  | 21  | 15  | 23  | 14  | 21  | 15  |
| SMMPA04276 | 12 | 15 | 19 | 146 | 127 | 90  | 43  | 62  | 46  |
| SMMPA04277 | 26 | 26 | 25 | 160 | 143 | 113 | 64  | 68  | 62  |
| SMMPA04278 | 0  | 0  | 0  | 1   | 0   | 1   | 0   | 1   | 0   |
| SMMPA04279 | 17 | 17 | 21 | 38  | 34  | 28  | 30  | 34  | 38  |
| SMMPA04280 | 11 | 13 | 20 | 109 | 100 | 71  | 36  | 70  | 38  |
| SMMPA04281 | 17 | 23 | 16 | 33  | 26  | 29  | 16  | 32  | 35  |
| SMMPA04282 | 32 | 23 | 27 | 47  | 48  | 46  | 42  | 58  | 67  |
| SMMPA04283 | 30 | 23 | 28 | 307 | 270 | 216 | 110 | 163 | 134 |
| SMMPA04284 | 17 | 16 | 10 | 16  | 17  | 16  | 21  | 19  | 24  |
| SMMPA04285 | 41 | 42 | 24 | 63  | 59  | 60  | 63  | 82  | 56  |
| SMMPA04286 | 9  | 7  | 15 | 66  | 72  | 41  | 27  | 42  | 45  |
| SMMPA04287 | 38 | 35 | 48 | 68  | 80  | 62  | 54  | 57  | 79  |
| SMMPA04288 | 10 | 16 | 8  | 60  | 83  | 41  | 30  | 42  | 40  |
| SMMPA04289 | 9  | 9  | 7  | 90  | 101 | 100 | 42  | 58  | 48  |
| SMMPA04290 | 13 | 15 | 10 | 55  | 54  | 44  | 19  | 26  | 23  |
| SMMPA04291 | 60 | 50 | 38 | 101 | 115 | 97  | 45  | 68  | 72  |
| SMMPA04292 | 26 | 27 | 24 | 73  | 95  | 52  | 45  | 68  | 56  |
| SMMPA04293 | 11 | 19 | 22 | 9   | 16  | 11  | 14  | 9   | 23  |
| SMMPA04294 | 5  | 7  | 9  | 7   | 8   | 9   | 9   | 15  | 9   |
| SMMPA04295 | 5  | 5  | 3  | 4   | 9   | 5   | 3   | 5   | 6   |
| SMMPA04296 | 9  | 8  | 9  | 14  | 12  | 14  | 19  | 20  | 17  |
| SMMPA04297 | 26 | 22 | 11 | 20  | 22  | 27  | 25  | 29  | 35  |
| SMMPA04298 | 10 | 12 | 14 | 36  | 32  | 22  | 19  | 22  | 25  |
| SMMPA04299 | 17 | 19 | 10 | 104 | 84  | 76  | 61  | 71  | 63  |
| SMMPA04300 | 4  | 3  | 5  | 12  | 13  | 8   | 3   | 7   | 9   |
| SMMPA04301 | 9  | 10 | 12 | 18  | 24  | 15  | 16  | 12  | 21  |
| SMMPA04302 | 29 | 29 | 25 | 103 | 128 | 78  | 51  | 80  | 71  |
| SMMPA04303 | 10 | 9  | 10 | 25  | 30  | 18  | 12  | 21  | 18  |
| SMMPA04304 | 6  | 10 | 10 | 14  | 17  | 16  | 8   | 9   | 5   |
| SMMPA04305 | 6  | 8  | 13 | 8   | 6   | 11  | 7   | 10  | 19  |
| SMMPA04306 | 16 | 13 | 10 | 51  | 61  | 43  | 27  | 30  | 33  |
| SMMPA04307 | 12 | 22 | 17 | 35  | 23  | 27  | 20  | 26  | 24  |
| SMMPA04308 | 22 | 18 | 36 | 49  | 48  | 50  | 27  | 36  | 26  |

|            |    |    |    |     |     |     |    |     |    |
|------------|----|----|----|-----|-----|-----|----|-----|----|
| SMMPA04309 | 26 | 29 | 23 | 104 | 82  | 79  | 61 | 67  | 65 |
| SMMPA04310 | 16 | 10 | 11 | 30  | 35  | 27  | 27 | 35  | 42 |
| SMMPA04311 | 7  | 9  | 9  | 11  | 16  | 14  | 12 | 18  | 22 |
| SMMPA04312 | 3  | 2  | 2  | 3   | 5   | 2   | 1  | 5   | 8  |
| SMMPA04313 | 25 | 20 | 26 | 56  | 65  | 71  | 35 | 48  | 40 |
| SMMPA04314 | 5  | 4  | 2  | 7   | 8   | 15  | 9  | 13  | 9  |
| SMMPA04315 | 4  | 4  | 7  | 8   | 10  | 4   | 4  | 6   | 5  |
| SMMPA04316 | 14 | 21 | 18 | 42  | 31  | 38  | 22 | 23  | 22 |
| SMMPA04317 | 14 | 14 | 12 | 39  | 36  | 27  | 31 | 34  | 23 |
| SMMPA04318 | 11 | 18 | 13 | 33  | 40  | 37  | 21 | 30  | 21 |
| SMMPA04319 | 14 | 13 | 6  | 9   | 11  | 6   | 12 | 16  | 17 |
| SMMPA04320 | 12 | 16 | 6  | 38  | 32  | 37  | 16 | 23  | 20 |
| SMMPA04321 | 12 | 8  | 12 | 53  | 50  | 29  | 22 | 25  | 28 |
| SMMPA04322 | 12 | 5  | 6  | 25  | 25  | 22  | 30 | 33  | 45 |
| SMMPA04323 | 9  | 14 | 14 | 21  | 19  | 18  | 39 | 51  | 39 |
| SMMPA04324 | 16 | 13 | 20 | 43  | 43  | 40  | 33 | 64  | 62 |
| SMMPA04325 | 14 | 21 | 12 | 75  | 78  | 52  | 70 | 77  | 93 |
| SMMPA04326 | 14 | 13 | 11 | 39  | 24  | 34  | 35 | 42  | 40 |
| SMMPA04327 | 18 | 15 | 9  | 54  | 52  | 43  | 36 | 54  | 38 |
| SMMPA04328 | 14 | 16 | 11 | 31  | 30  | 22  | 36 | 48  | 44 |
| SMMPA04329 | 15 | 12 | 8  | 48  | 42  | 33  | 41 | 76  | 61 |
| SMMPA04330 | 9  | 6  | 19 | 19  | 12  | 16  | 32 | 27  | 26 |
| SMMPA04331 | 15 | 22 | 15 | 42  | 34  | 29  | 73 | 74  | 64 |
| SMMPA04332 | 6  | 18 | 12 | 43  | 45  | 46  | 40 | 61  | 48 |
| SMMPA04333 | 23 | 18 | 11 | 65  | 63  | 46  | 30 | 45  | 31 |
| SMMPA04334 | 11 | 18 | 12 | 14  | 17  | 13  | 13 | 20  | 24 |
| SMMPA04335 | 15 | 13 | 17 | 20  | 22  | 10  | 17 | 14  | 19 |
| SMMPA04336 | 27 | 29 | 36 | 52  | 36  | 43  | 37 | 58  | 61 |
| SMMPA04337 | 12 | 19 | 22 | 39  | 46  | 53  | 26 | 37  | 37 |
| SMMPA04338 | 21 | 15 | 11 | 23  | 25  | 24  | 23 | 32  | 36 |
| SMMPA04339 | 14 | 13 | 6  | 22  | 15  | 16  | 24 | 29  | 32 |
| SMMPA04340 | 25 | 21 | 23 | 43  | 28  | 31  | 52 | 51  | 43 |
| SMMPA04341 | 29 | 20 | 22 | 34  | 26  | 34  | 33 | 41  | 42 |
| SMMPA04342 | 13 | 8  | 11 | 27  | 18  | 20  | 13 | 29  | 23 |
| SMMPA04343 | 12 | 17 | 21 | 47  | 30  | 35  | 35 | 47  | 41 |
| SMMPA04344 | 28 | 25 | 15 | 32  | 22  | 18  | 31 | 34  | 23 |
| SMMPA04345 | 20 | 21 | 16 | 44  | 40  | 15  | 29 | 52  | 43 |
| SMMPA04346 | 24 | 29 | 19 | 34  | 44  | 33  | 32 | 44  | 48 |
| SMMPA04347 | 23 | 17 | 27 | 31  | 22  | 18  | 20 | 55  | 45 |
| SMMPA04348 | 35 | 35 | 25 | 84  | 66  | 72  | 48 | 58  | 75 |
| SMMPA04349 | 51 | 27 | 32 | 175 | 129 | 111 | 56 | 101 | 98 |

|            |     |     |     |      |      |      |     |     |     |
|------------|-----|-----|-----|------|------|------|-----|-----|-----|
| SMMPA04350 | 10  | 6   | 16  | 17   | 21   | 15   | 12  | 16  | 15  |
| SMMPA04351 | 8   | 9   | 12  | 22   | 15   | 17   | 11  | 19  | 12  |
| SMMPA04352 | 11  | 8   | 7   | 15   | 27   | 15   | 7   | 9   | 9   |
| SMMPA04353 | 11  | 5   | 6   | 18   | 16   | 16   | 16  | 11  | 14  |
| SMMPA04354 | 15  | 17  | 9   | 22   | 21   | 22   | 16  | 21  | 21  |
| SMMPA04355 | 16  | 16  | 21  | 37   | 28   | 37   | 15  | 24  | 20  |
| SMMPA04356 | 12  | 7   | 12  | 7    | 14   | 10   | 10  | 11  | 15  |
| SMMPA04357 | 3   | 1   | 2   | 2    | 2    | 2    | 2   | 4   | 2   |
| SMMPA04358 | 6   | 4   | 3   | 8    | 9    | 15   | 3   | 2   | 4   |
| SMMPA04359 | 24  | 24  | 15  | 124  | 123  | 83   | 41  | 59  | 62  |
| SMMPA04360 | 22  | 26  | 12  | 34   | 40   | 36   | 27  | 27  | 28  |
| SMMPA04361 | 28  | 25  | 28  | 21   | 27   | 28   | 32  | 39  | 37  |
| SMMPA04362 | 55  | 54  | 42  | 32   | 29   | 35   | 46  | 70  | 53  |
| SMMPA04363 | 141 | 113 | 100 | 582  | 532  | 506  | 230 | 335 | 274 |
| SMMPA04364 | 26  | 35  | 24  | 42   | 47   | 31   | 35  | 54  | 42  |
| SMMPA04365 | 18  | 12  | 20  | 11   | 12   | 17   | 14  | 20  | 16  |
| SMMPA04366 | 26  | 24  | 28  | 1293 | 1198 | 1174 | 599 | 811 | 707 |
| SMMPA04367 | 13  | 9   | 14  | 15   | 25   | 15   | 17  | 13  | 27  |
| SMMPA04368 | 25  | 25  | 25  | 17   | 13   | 19   | 15  | 16  | 30  |
| SMMPA04369 | 10  | 9   | 10  | 11   | 6    | 13   | 11  | 15  | 14  |
| SMMPA04370 | 12  | 11  | 8   | 47   | 56   | 42   | 24  | 28  | 28  |
| SMMPA04371 | 16  | 6   | 11  | 26   | 18   | 12   | 12  | 15  | 14  |
| SMMPA04372 | 28  | 32  | 23  | 205  | 166  | 116  | 69  | 98  | 62  |
| SMMPA04373 | 38  | 34  | 33  | 75   | 75   | 61   | 42  | 73  | 69  |
| SMMPA04374 | 33  | 34  | 33  | 127  | 103  | 93   | 57  | 75  | 61  |
| SMMPA04375 | 33  | 38  | 30  | 144  | 152  | 102  | 71  | 88  | 77  |
| SMMPA04376 | 21  | 19  | 20  | 80   | 80   | 78   | 38  | 56  | 42  |
| SMMPA04377 | 43  | 58  | 37  | 94   | 93   | 73   | 56  | 67  | 59  |
| SMMPA04378 | 29  | 28  | 13  | 32   | 26   | 32   | 38  | 34  | 45  |
| SMMPA04379 | 14  | 39  | 22  | 212  | 195  | 144  | 91  | 141 | 95  |
| SMMPA04380 | 19  | 17  | 17  | 28   | 18   | 17   | 20  | 21  | 34  |
| SMMPA04381 | 14  | 16  | 15  | 40   | 38   | 25   | 23  | 24  | 20  |
| SMMPA04382 | 15  | 18  | 13  | 22   | 9    | 14   | 24  | 19  | 24  |
| SMMPA04383 | 45  | 24  | 35  | 58   | 45   | 40   | 35  | 44  | 51  |
| SMMPA04384 | 16  | 11  | 7   | 19   | 14   | 16   | 14  | 21  | 15  |
| SMMPA04385 | 27  | 24  | 22  | 171  | 156  | 140  | 70  | 78  | 82  |
| SMMPA04386 | 28  | 28  | 39  | 41   | 37   | 38   | 41  | 45  | 55  |
| SMMPA04387 | 20  | 27  | 18  | 17   | 24   | 20   | 24  | 28  | 27  |
| SMMPA04388 | 25  | 17  | 24  | 52   | 31   | 38   | 39  | 52  | 41  |
| SMMPA04389 | 39  | 31  | 28  | 31   | 18   | 21   | 38  | 44  | 37  |
| SMMPA04390 | 10  | 11  | 17  | 15   | 23   | 12   | 12  | 19  | 19  |

|            |    |    |    |     |     |     |     |     |     |
|------------|----|----|----|-----|-----|-----|-----|-----|-----|
| SMMPA04391 | 11 | 27 | 21 | 33  | 37  | 44  | 30  | 38  | 38  |
| SMMPA04392 | 17 | 31 | 24 | 35  | 40  | 28  | 35  | 30  | 37  |
| SMMPA04393 | 23 | 20 | 7  | 32  | 17  | 16  | 25  | 31  | 21  |
| SMMPA04394 | 50 | 30 | 24 | 37  | 48  | 37  | 35  | 50  | 47  |
| SMMPA04395 | 30 | 37 | 26 | 56  | 58  | 51  | 41  | 43  | 54  |
| SMMPA04396 | 33 | 30 | 21 | 31  | 39  | 40  | 34  | 49  | 33  |
| SMMPA04397 | 18 | 29 | 23 | 61  | 33  | 30  | 38  | 56  | 50  |
| SMMPA04398 | 40 | 44 | 43 | 59  | 42  | 53  | 72  | 80  | 78  |
| SMMPA04399 | 14 | 15 | 9  | 30  | 42  | 25  | 25  | 20  | 27  |
| SMMPA04400 | 9  | 13 | 18 | 49  | 35  | 39  | 28  | 43  | 22  |
| SMMPA04401 | 20 | 16 | 11 | 26  | 18  | 24  | 17  | 20  | 21  |
| SMMPA04402 | 9  | 10 | 8  | 14  | 20  | 12  | 17  | 18  | 20  |
| SMMPA04403 | 30 | 46 | 40 | 54  | 41  | 40  | 62  | 92  | 89  |
| SMMPA04404 | 30 | 27 | 29 | 45  | 39  | 51  | 46  | 65  | 55  |
| SMMPA04405 | 25 | 33 | 33 | 24  | 30  | 28  | 47  | 55  | 62  |
| SMMPA04406 | 69 | 95 | 72 | 116 | 128 | 106 | 108 | 153 | 144 |
| SMMPA04407 | 12 | 15 | 14 | 15  | 15  | 15  | 24  | 24  | 24  |
| SMMPA04408 | 7  | 6  | 7  | 22  | 22  | 23  | 13  | 21  | 21  |
| SMMPA04409 | 26 | 33 | 31 | 39  | 43  | 37  | 32  | 33  | 36  |
| SMMPA04410 | 24 | 26 | 17 | 88  | 76  | 65  | 35  | 56  | 60  |
| SMMPA04411 | 31 | 33 | 29 | 331 | 273 | 215 | 133 | 190 | 165 |
| SMMPA04412 | 74 | 69 | 64 | 240 | 231 | 182 | 131 | 160 | 163 |
| SMMPA04413 | 6  | 8  | 13 | 27  | 34  | 22  | 14  | 21  | 17  |
| SMMPA04414 | 13 | 13 | 10 | 42  | 27  | 27  | 27  | 24  | 30  |
| SMMPA04415 | 24 | 24 | 21 | 35  | 41  | 35  | 34  | 39  | 38  |
| SMMPA04416 | 45 | 36 | 39 | 108 | 86  | 72  | 58  | 90  | 84  |
| SMMPA04417 | 24 | 24 | 11 | 51  | 39  | 28  | 32  | 32  | 35  |
| SMMPA04418 | 31 | 30 | 27 | 49  | 34  | 27  | 27  | 32  | 41  |
| SMMPA04419 | 26 | 31 | 21 | 53  | 53  | 46  | 49  | 50  | 52  |
| SMMPA04420 | 58 | 67 | 68 | 52  | 49  | 41  | 61  | 67  | 69  |
| SMMPA04421 | 41 | 39 | 34 | 44  | 36  | 36  | 46  | 44  | 50  |
| SMMPA04422 | 50 | 62 | 46 | 60  | 48  | 43  | 45  | 71  | 79  |
| SMMPA04423 | 11 | 9  | 10 | 16  | 19  | 23  | 9   | 16  | 9   |
| SMMPA04424 | 52 | 44 | 42 | 74  | 74  | 42  | 47  | 54  | 52  |
| SMMPA04425 | 43 | 45 | 34 | 94  | 62  | 76  | 71  | 87  | 75  |
| SMMPA04426 | 15 | 14 | 13 | 71  | 55  | 58  | 59  | 57  | 45  |
| SMMPA04427 | 23 | 27 | 15 | 70  | 71  | 63  | 38  | 43  | 44  |
| SMMPA04428 | 12 | 21 | 21 | 214 | 187 | 164 | 99  | 123 | 95  |
| SMMPA04429 | 32 | 26 | 27 | 64  | 38  | 38  | 38  | 48  | 57  |
| SMMPA04430 | 25 | 38 | 22 | 50  | 33  | 40  | 28  | 51  | 45  |
| SMMPA04431 | 44 | 46 | 48 | 71  | 70  | 44  | 56  | 72  | 59  |

|            |    |    |    |     |     |     |    |     |    |
|------------|----|----|----|-----|-----|-----|----|-----|----|
| SMMPA04432 | 30 | 23 | 20 | 30  | 43  | 21  | 35 | 50  | 41 |
| SMMPA04433 | 24 | 24 | 18 | 73  | 53  | 38  | 34 | 55  | 41 |
| SMMPA04434 | 15 | 23 | 16 | 32  | 26  | 31  | 29 | 30  | 34 |
| SMMPA04435 | 17 | 9  | 9  | 12  | 14  | 13  | 20 | 17  | 22 |
| SMMPA04436 | 32 | 27 | 26 | 40  | 28  | 28  | 36 | 38  | 47 |
| SMMPA04437 | 23 | 30 | 22 | 169 | 153 | 111 | 77 | 93  | 89 |
| SMMPA04438 | 21 | 18 | 18 | 58  | 64  | 38  | 41 | 48  | 41 |
| SMMPA04439 | 25 | 15 | 12 | 73  | 60  | 51  | 39 | 49  | 61 |
| SMMPA04440 | 26 | 30 | 16 | 56  | 46  | 66  | 26 | 42  | 45 |
| SMMPA04441 | 14 | 14 | 15 | 5   | 15  | 13  | 10 | 16  | 14 |
| SMMPA04442 | 11 | 8  | 14 | 4   | 10  | 4   | 14 | 15  | 11 |
| SMMPA04443 | 7  | 10 | 7  | 54  | 50  | 40  | 40 | 37  | 47 |
| SMMPA04444 | 10 | 10 | 11 | 13  | 17  | 12  | 11 | 14  | 27 |
| SMMPA04445 | 27 | 20 | 25 | 25  | 27  | 22  | 24 | 35  | 33 |
| SMMPA04446 | 21 | 28 | 23 | 18  | 22  | 19  | 24 | 49  | 60 |
| SMMPA04447 | 8  | 13 | 13 | 27  | 16  | 21  | 26 | 19  | 23 |
| SMMPA04448 | 8  | 6  | 6  | 11  | 7   | 6   | 16 | 25  | 12 |
| SMMPA04449 | 13 | 15 | 21 | 80  | 68  | 51  | 35 | 51  | 47 |
| SMMPA04450 | 19 | 22 | 19 | 63  | 50  | 52  | 34 | 48  | 44 |
| SMMPA04451 | 27 | 12 | 17 | 55  | 61  | 41  | 30 | 44  | 42 |
| SMMPA04452 | 38 | 28 | 30 | 124 | 116 | 113 | 58 | 87  | 60 |
| SMMPA04453 | 23 | 23 | 24 | 155 | 148 | 111 | 61 | 77  | 61 |
| SMMPA04454 | 24 | 24 | 22 | 224 | 230 | 160 | 90 | 121 | 84 |
| SMMPA04455 | 10 | 10 | 6  | 42  | 36  | 29  | 21 | 26  | 16 |
| SMMPA04456 | 4  | 3  | 5  | 93  | 63  | 41  | 55 | 50  | 36 |
| SMMPA04457 | 11 | 11 | 12 | 49  | 47  | 33  | 27 | 19  | 29 |
| SMMPA04458 | 46 | 62 | 30 | 64  | 57  | 52  | 33 | 69  | 55 |
| SMMPA04459 | 11 | 19 | 17 | 41  | 37  | 43  | 17 | 27  | 26 |
| SMMPA04460 | 21 | 9  | 17 | 47  | 49  | 22  | 40 | 31  | 30 |
| SMMPA04461 | 0  | 1  | 1  | 1   | 1   | 1   | 2  | 2   | 3  |
| SMMPA04462 | 9  | 18 | 20 | 127 | 111 | 104 | 68 | 98  | 85 |
| SMMPA04463 | 8  | 10 | 8  | 35  | 32  | 21  | 16 | 28  | 20 |
| SMMPA04464 | 8  | 3  | 3  | 6   | 9   | 6   | 1  | 9   | 4  |
| SMMPA04465 | 8  | 12 | 15 | 28  | 22  | 18  | 38 | 25  | 18 |
| SMMPA04466 | 27 | 33 | 20 | 9   | 10  | 15  | 23 | 29  | 27 |
| SMMPA04467 | 43 | 43 | 42 | 55  | 45  | 47  | 50 | 69  | 65 |
| SMMPA04468 | 27 | 27 | 27 | 43  | 32  | 38  | 31 | 48  | 65 |
| SMMPA04469 | 10 | 10 | 6  | 31  | 21  | 31  | 21 | 19  | 17 |
| SMMPA04470 | 44 | 43 | 37 | 121 | 129 | 84  | 79 | 76  | 85 |
| SMMPA04471 | 20 | 23 | 18 | 64  | 67  | 47  | 27 | 33  | 34 |
| SMMPA04472 | 29 | 21 | 27 | 63  | 63  | 50  | 30 | 58  | 45 |

|            |     |     |     |     |     |     |     |     |     |
|------------|-----|-----|-----|-----|-----|-----|-----|-----|-----|
| SMMPA04473 | 6   | 5   | 1   | 15  | 17  | 18  | 6   | 11  | 10  |
| SMMPA04474 | 11  | 9   | 6   | 9   | 8   | 5   | 15  | 11  | 16  |
| SMMPA04475 | 24  | 18  | 13  | 23  | 21  | 25  | 13  | 20  | 22  |
| SMMPA04476 | 39  | 47  | 37  | 62  | 55  | 60  | 25  | 51  | 35  |
| SMMPA04477 | 16  | 14  | 11  | 43  | 51  | 30  | 26  | 19  | 21  |
| SMMPA04478 | 13  | 25  | 10  | 26  | 21  | 17  | 14  | 19  | 19  |
| SMMPA04479 | 10  | 20  | 28  | 16  | 13  | 10  | 7   | 14  | 25  |
| SMMPA04480 | 22  | 13  | 16  | 71  | 85  | 58  | 57  | 74  | 55  |
| SMMPA04481 | 23  | 20  | 15  | 35  | 34  | 18  | 30  | 33  | 35  |
| SMMPA04482 | 25  | 27  | 19  | 79  | 85  | 56  | 32  | 61  | 61  |
| SMMPA04483 | 37  | 36  | 46  | 35  | 30  | 31  | 20  | 48  | 56  |
| SMMPA04484 | 63  | 69  | 60  | 66  | 70  | 69  | 61  | 84  | 104 |
| SMMPA04485 | 82  | 84  | 62  | 66  | 69  | 64  | 87  | 109 | 112 |
| SMMPA04486 | 147 | 161 | 109 | 87  | 89  | 69  | 188 | 243 | 220 |
| SMMPA04487 | 80  | 84  | 63  | 72  | 72  | 53  | 63  | 90  | 74  |
| SMMPA04488 | 47  | 45  | 29  | 60  | 35  | 52  | 52  | 44  | 59  |
| SMMPA04489 | 44  | 49  | 32  | 59  | 50  | 47  | 39  | 66  | 63  |
| SMMPA04490 | 20  | 24  | 22  | 32  | 32  | 42  | 17  | 34  | 19  |
| SMMPA04491 | 118 | 147 | 112 | 140 | 156 | 127 | 127 | 133 | 126 |
| SMMPA04492 | 46  | 53  | 54  | 50  | 29  | 49  | 68  | 39  | 63  |
| SMMPA04493 | 53  | 60  | 61  | 66  | 49  | 50  | 105 | 137 | 122 |
| SMMPA04494 | 52  | 26  | 23  | 47  | 37  | 31  | 29  | 41  | 36  |
| SMMPA04495 | 24  | 22  | 18  | 37  | 31  | 31  | 33  | 47  | 30  |
| SMMPA04496 | 12  | 19  | 23  | 12  | 22  | 19  | 26  | 25  | 23  |
| SMMPA04497 | 22  | 28  | 20  | 25  | 23  | 22  | 29  | 20  | 27  |
| SMMPA04498 | 46  | 37  | 29  | 63  | 51  | 54  | 49  | 76  | 77  |
| SMMPA04499 | 29  | 31  | 30  | 82  | 64  | 48  | 69  | 75  | 58  |
| SMMPA04500 | 20  | 31  | 22  | 70  | 48  | 47  | 59  | 47  | 45  |
| SMMPA04501 | 39  | 34  | 26  | 96  | 80  | 66  | 70  | 72  | 89  |
| SMMPA04502 | 21  | 15  | 20  | 33  | 39  | 28  | 28  | 42  | 40  |
| SMMPA04503 | 22  | 45  | 43  | 90  | 52  | 49  | 37  | 61  | 57  |
| SMMPA04504 | 22  | 19  | 25  | 92  | 70  | 71  | 45  | 61  | 49  |
| SMMPA04505 | 34  | 29  | 24  | 246 | 227 | 182 | 90  | 124 | 114 |
| SMMPA04506 | 103 | 119 | 109 | 102 | 114 | 90  | 67  | 88  | 115 |
| SMMPA04507 | 130 | 132 | 128 | 322 | 314 | 251 | 150 | 230 | 210 |
| SMMPA04508 | 11  | 16  | 16  | 21  | 18  | 4   | 10  | 31  | 24  |
| SMMPA04509 | 6   | 6   | 8   | 13  | 14  | 21  | 6   | 11  | 15  |
| SMMPA04510 | 25  | 23  | 15  | 50  | 45  | 32  | 24  | 49  | 40  |
| SMMPA04511 | 45  | 37  | 34  | 70  | 52  | 41  | 43  | 63  | 60  |
| SMMPA04512 | 23  | 17  | 22  | 21  | 20  | 15  | 18  | 20  | 18  |
| SMMPA04513 | 24  | 21  | 32  | 28  | 29  | 32  | 37  | 36  | 37  |

|            |    |    |    |     |     |     |    |     |     |
|------------|----|----|----|-----|-----|-----|----|-----|-----|
| SMMPA04514 | 28 | 25 | 23 | 27  | 34  | 23  | 23 | 56  | 46  |
| SMMPA04515 | 43 | 32 | 38 | 86  | 65  | 65  | 89 | 94  | 81  |
| SMMPA04516 | 25 | 18 | 21 | 33  | 29  | 31  | 41 | 44  | 41  |
| SMMPA04517 | 14 | 17 | 17 | 22  | 27  | 17  | 14 | 22  | 16  |
| SMMPA04518 | 41 | 29 | 27 | 38  | 41  | 33  | 25 | 31  | 28  |
| SMMPA04519 | 33 | 28 | 24 | 40  | 45  | 41  | 34 | 37  | 31  |
| SMMPA04520 | 40 | 30 | 33 | 104 | 105 | 87  | 62 | 82  | 69  |
| SMMPA04521 | 18 | 17 | 15 | 65  | 58  | 51  | 42 | 52  | 49  |
| SMMPA04522 | 21 | 26 | 22 | 52  | 54  | 43  | 27 | 34  | 34  |
| SMMPA04523 | 14 | 23 | 20 | 66  | 39  | 41  | 27 | 27  | 33  |
| SMMPA04524 | 42 | 57 | 48 | 45  | 60  | 32  | 46 | 46  | 57  |
| SMMPA04525 | 20 | 20 | 23 | 60  | 54  | 34  | 32 | 29  | 38  |
| SMMPA04526 | 17 | 20 | 19 | 40  | 38  | 33  | 27 | 37  | 22  |
| SMMPA04527 | 17 | 19 | 20 | 87  | 63  | 69  | 46 | 41  | 44  |
| SMMPA04528 | 39 | 36 | 25 | 37  | 43  | 29  | 39 | 35  | 38  |
| SMMPA04529 | 23 | 11 | 24 | 69  | 74  | 49  | 43 | 59  | 52  |
| SMMPA04530 | 56 | 68 | 57 | 85  | 99  | 57  | 53 | 90  | 83  |
| SMMPA04531 | 19 | 13 | 15 | 36  | 26  | 24  | 18 | 20  | 26  |
| SMMPA04532 | 64 | 58 | 38 | 35  | 44  | 44  | 34 | 48  | 62  |
| SMMPA04533 | 37 | 25 | 26 | 30  | 45  | 30  | 34 | 47  | 43  |
| SMMPA04534 | 28 | 28 | 28 | 85  | 74  | 74  | 55 | 79  | 72  |
| SMMPA04535 | 31 | 32 | 30 | 73  | 70  | 50  | 51 | 77  | 81  |
| SMMPA04536 | 18 | 24 | 14 | 61  | 56  | 43  | 33 | 40  | 58  |
| SMMPA04537 | 24 | 21 | 27 | 94  | 69  | 81  | 39 | 62  | 54  |
| SMMPA04538 | 45 | 39 | 28 | 131 | 132 | 95  | 97 | 124 | 115 |
| SMMPA04539 | 28 | 27 | 24 | 128 | 119 | 109 | 54 | 79  | 70  |
| SMMPA04540 | 13 | 17 | 10 | 32  | 39  | 39  | 21 | 43  | 42  |
| SMMPA04541 | 17 | 21 | 16 | 94  | 84  | 78  | 37 | 52  | 56  |
| SMMPA04542 | 24 | 34 | 21 | 103 | 96  | 91  | 73 | 87  | 71  |
| SMMPA04543 | 37 | 35 | 18 | 44  | 39  | 30  | 31 | 45  | 40  |
| SMMPA04544 | 20 | 16 | 17 | 33  | 19  | 11  | 22 | 23  | 26  |
| SMMPA04545 | 30 | 38 | 23 | 22  | 31  | 25  | 28 | 29  | 32  |
| SMMPA04546 | 19 | 22 | 10 | 27  | 37  | 23  | 23 | 34  | 29  |
| SMMPA04547 | 17 | 22 | 17 | 34  | 14  | 25  | 19 | 39  | 36  |
| SMMPA04548 | 13 | 18 | 11 | 26  | 28  | 19  | 16 | 21  | 23  |
| SMMPA04549 | 11 | 13 | 5  | 19  | 17  | 23  | 22 | 24  | 26  |
| SMMPA04550 | 18 | 17 | 26 | 64  | 59  | 39  | 42 | 29  | 34  |
| SMMPA04551 | 21 | 17 | 14 | 60  | 50  | 33  | 24 | 51  | 36  |
| SMMPA04552 | 24 | 27 | 19 | 74  | 67  | 58  | 46 | 52  | 40  |
| SMMPA04553 | 18 | 19 | 13 | 34  | 25  | 31  | 29 | 32  | 29  |
| SMMPA04554 | 12 | 13 | 14 | 27  | 25  | 28  | 23 | 25  | 37  |



|            |    |    |    |     |     |     |     |     |     |
|------------|----|----|----|-----|-----|-----|-----|-----|-----|
| SMMPA04555 | 30 | 36 | 26 | 53  | 46  | 57  | 50  | 64  | 67  |
| SMMPA04556 | 25 | 24 | 23 | 43  | 33  | 23  | 31  | 50  | 55  |
| SMMPA04557 | 28 | 29 | 25 | 57  | 37  | 33  | 27  | 40  | 54  |
| SMMPA04558 | 16 | 13 | 18 | 19  | 15  | 11  | 14  | 25  | 24  |
| SMMPA04559 | 29 | 33 | 36 | 114 | 96  | 79  | 70  | 102 | 115 |
| SMMPA04560 | 29 | 38 | 26 | 32  | 42  | 42  | 33  | 49  | 35  |
| SMMPA04561 | 18 | 20 | 19 | 58  | 57  | 45  | 33  | 40  | 42  |
| SMMPA04562 | 8  | 10 | 14 | 18  | 14  | 14  | 11  | 17  | 18  |
| SMMPA04563 | 20 | 35 | 28 | 34  | 33  | 39  | 13  | 28  | 27  |
| SMMPA04564 | 34 | 52 | 40 | 75  | 80  | 73  | 42  | 46  | 40  |
| SMMPA04565 | 16 | 20 | 21 | 21  | 34  | 27  | 32  | 34  | 28  |
| SMMPA04566 | 28 | 30 | 28 | 60  | 76  | 54  | 30  | 43  | 28  |
| SMMPA04567 | 35 | 44 | 34 | 57  | 54  | 46  | 30  | 54  | 44  |
| SMMPA04568 | 15 | 20 | 13 | 56  | 64  | 43  | 42  | 46  | 48  |
| SMMPA04569 | 72 | 68 | 62 | 152 | 113 | 104 | 98  | 124 | 113 |
| SMMPA04570 | 14 | 30 | 17 | 46  | 45  | 38  | 24  | 40  | 28  |
| SMMPA04571 | 14 | 19 | 16 | 17  | 20  | 13  | 13  | 22  | 35  |
| SMMPA04572 | 71 | 90 | 65 | 69  | 48  | 58  | 80  | 88  | 100 |
| SMMPA04573 | 12 | 14 | 9  | 30  | 26  | 27  | 5   | 15  | 13  |
| SMMPA04574 | 6  | 11 | 17 | 14  | 20  | 20  | 19  | 17  | 28  |
| SMMPA04575 | 17 | 21 | 9  | 100 | 69  | 69  | 53  | 68  | 65  |
| SMMPA04576 | 15 | 22 | 18 | 42  | 25  | 31  | 43  | 37  | 36  |
| SMMPA04577 | 21 | 10 | 10 | 433 | 344 | 321 | 180 | 214 | 210 |
| SMMPA04578 | 28 | 29 | 31 | 58  | 63  | 39  | 38  | 51  | 49  |
| SMMPA04579 | 14 | 32 | 20 | 27  | 28  | 26  | 14  | 17  | 18  |
| SMMPA04580 | 34 | 25 | 23 | 87  | 74  | 48  | 44  | 70  | 57  |
| SMMPA04581 | 8  | 5  | 10 | 19  | 17  | 10  | 11  | 13  | 15  |
| SMMPA04582 | 22 | 22 | 21 | 657 | 558 | 464 | 264 | 359 | 305 |
| SMMPA04583 | 36 | 37 | 32 | 117 | 78  | 87  | 74  | 108 | 98  |
| SMMPA04584 | 25 | 26 | 19 | 309 | 298 | 231 | 151 | 205 | 196 |
| SMMPA04585 | 39 | 47 | 41 | 73  | 55  | 48  | 55  | 70  | 76  |
| SMMPA04586 | 28 | 41 | 26 | 89  | 79  | 48  | 46  | 68  | 66  |
| SMMPA04587 | 38 | 31 | 30 | 32  | 30  | 19  | 37  | 48  | 70  |
| SMMPA04588 | 24 | 22 | 33 | 34  | 37  | 29  | 29  | 34  | 31  |
| SMMPA04589 | 14 | 14 | 7  | 27  | 27  | 21  | 23  | 40  | 26  |
| SMMPA04590 | 7  | 9  | 14 | 18  | 11  | 17  | 11  | 27  | 26  |
| SMMPA04591 | 18 | 22 | 29 | 46  | 49  | 29  | 40  | 44  | 50  |
| SMMPA04592 | 7  | 11 | 8  | 44  | 54  | 35  | 27  | 43  | 35  |
| SMMPA04593 | 20 | 23 | 15 | 49  | 59  | 45  | 39  | 64  | 55  |
| SMMPA04594 | 8  | 10 | 8  | 30  | 23  | 30  | 41  | 36  | 38  |
| SMMPA04595 | 5  | 5  | 6  | 11  | 10  | 11  | 14  | 24  | 22  |

|            |    |    |    |     |     |     |     |     |     |
|------------|----|----|----|-----|-----|-----|-----|-----|-----|
| SMMPA04596 | 18 | 16 | 15 | 32  | 15  | 15  | 28  | 36  | 31  |
| SMMPA04597 | 12 | 24 | 22 | 34  | 28  | 27  | 47  | 41  | 48  |
| SMMPA04598 | 11 | 15 | 15 | 23  | 24  | 24  | 19  | 34  | 27  |
| SMMPA04599 | 3  | 7  | 4  | 22  | 16  | 13  | 20  | 12  | 21  |
| SMMPA04600 | 69 | 71 | 66 | 169 | 187 | 145 | 122 | 161 | 157 |
| SMMPA04601 | 6  | 6  | 4  | 21  | 24  | 14  | 5   | 20  | 16  |
| SMMPA04602 | 30 | 20 | 19 | 52  | 40  | 41  | 27  | 39  | 38  |
| SMMPA04603 | 14 | 21 | 15 | 123 | 128 | 88  | 53  | 86  | 60  |
| SMMPA04604 | 16 | 20 | 10 | 112 | 92  | 80  | 63  | 55  | 49  |
| SMMPA04605 | 19 | 15 | 22 | 34  | 23  | 25  | 17  | 19  | 22  |
| SMMPA04606 | 0  | 3  | 2  | 21  | 12  | 15  | 17  | 14  | 14  |
| SMMPA04607 | 13 | 14 | 10 | 134 | 129 | 92  | 49  | 88  | 58  |
| SMMPA04608 | 5  | 14 | 15 | 42  | 29  | 35  | 30  | 35  | 34  |
| SMMPA04609 | 12 | 8  | 8  | 7   | 9   | 8   | 18  | 23  | 21  |
| SMMPA04610 | 15 | 16 | 12 | 27  | 24  | 22  | 9   | 26  | 22  |
| SMMPA04611 | 24 | 19 | 24 | 32  | 31  | 25  | 26  | 47  | 27  |
| SMMPA04612 | 23 | 44 | 23 | 114 | 82  | 84  | 35  | 58  | 56  |
| SMMPA04613 | 13 | 11 | 21 | 25  | 22  | 26  | 22  | 33  | 31  |
| SMMPA04614 | 15 | 12 | 11 | 23  | 25  | 20  | 18  | 35  | 31  |
| SMMPA04615 | 27 | 33 | 29 | 17  | 18  | 22  | 33  | 45  | 39  |
| SMMPA04616 | 29 | 21 | 30 | 41  | 33  | 39  | 17  | 31  | 38  |
| SMMPA04617 | 17 | 21 | 24 | 28  | 36  | 27  | 21  | 36  | 36  |
| SMMPA04618 | 20 | 29 | 18 | 55  | 28  | 30  | 29  | 39  | 40  |
| SMMPA04619 | 31 | 36 | 19 | 32  | 40  | 24  | 26  | 43  | 39  |
| SMMPA04620 | 48 | 42 | 51 | 72  | 70  | 60  | 62  | 110 | 75  |
| SMMPA04621 | 30 | 38 | 25 | 77  | 66  | 44  | 40  | 46  | 64  |
| SMMPA04622 | 31 | 30 | 31 | 33  | 24  | 33  | 38  | 42  | 46  |
| SMMPA04623 | 33 | 49 | 44 | 68  | 66  | 57  | 46  | 62  | 72  |
| SMMPA04624 | 21 | 24 | 30 | 48  | 35  | 41  | 33  | 38  | 50  |
| SMMPA04625 | 26 | 30 | 35 | 85  | 70  | 54  | 72  | 105 | 76  |
| SMMPA04626 | 36 | 51 | 42 | 93  | 86  | 63  | 62  | 82  | 89  |
| SMMPA04627 | 23 | 21 | 17 | 107 | 100 | 67  | 52  | 64  | 54  |
| SMMPA04628 | 24 | 25 | 27 | 49  | 52  | 42  | 38  | 38  | 38  |
| SMMPA04629 | 22 | 23 | 21 | 27  | 26  | 15  | 24  | 21  | 20  |
| SMMPA04630 | 18 | 24 | 27 | 55  | 63  | 44  | 38  | 40  | 48  |
| SMMPA04631 | 16 | 17 | 14 | 39  | 29  | 27  | 26  | 30  | 21  |
| SMMPA04632 | 10 | 7  | 8  | 23  | 13  | 16  | 6   | 17  | 7   |
| SMMPA04633 | 10 | 10 | 16 | 34  | 17  | 12  | 29  | 27  | 29  |
| SMMPA04634 | 18 | 13 | 14 | 27  | 28  | 16  | 30  | 23  | 25  |
| SMMPA04635 | 9  | 14 | 15 | 23  | 26  | 27  | 22  | 14  | 28  |
| SMMPA04636 | 6  | 12 | 11 | 13  | 6   | 10  | 11  | 12  | 9   |

|            |    |    |    |     |     |     |    |     |     |
|------------|----|----|----|-----|-----|-----|----|-----|-----|
| SMMPA04637 | 9  | 16 | 5  | 20  | 14  | 16  | 15 | 16  | 28  |
| SMMPA04638 | 16 | 17 | 17 | 33  | 31  | 18  | 18 | 30  | 41  |
| SMMPA04639 | 17 | 15 | 15 | 24  | 15  | 19  | 23 | 34  | 22  |
| SMMPA04640 | 20 | 9  | 11 | 14  | 15  | 10  | 15 | 22  | 19  |
| SMMPA04641 | 19 | 22 | 14 | 18  | 26  | 23  | 28 | 33  | 33  |
| SMMPA04642 | 13 | 17 | 10 | 15  | 9   | 17  | 16 | 20  | 15  |
| SMMPA04643 | 18 | 24 | 12 | 30  | 25  | 27  | 24 | 39  | 25  |
| SMMPA04644 | 7  | 14 | 5  | 12  | 4   | 19  | 15 | 22  | 17  |
| SMMPA04645 | 27 | 21 | 23 | 114 | 106 | 88  | 52 | 69  | 75  |
| SMMPA04646 | 19 | 19 | 16 | 18  | 21  | 19  | 31 | 20  | 34  |
| SMMPA04647 | 12 | 12 | 10 | 18  | 16  | 22  | 15 | 16  | 27  |
| SMMPA04648 | 18 | 23 | 12 | 41  | 32  | 16  | 33 | 33  | 34  |
| SMMPA04649 | 10 | 12 | 17 | 96  | 93  | 57  | 41 | 60  | 51  |
| SMMPA04650 | 21 | 21 | 11 | 189 | 158 | 127 | 79 | 92  | 98  |
| SMMPA04651 | 31 | 41 | 27 | 105 | 95  | 91  | 61 | 69  | 68  |
| SMMPA04652 | 33 | 30 | 20 | 193 | 164 | 111 | 96 | 143 | 121 |
| SMMPA04653 | 11 | 17 | 12 | 33  | 31  | 29  | 46 | 42  | 44  |
| SMMPA04654 | 19 | 22 | 19 | 49  | 66  | 36  | 54 | 71  | 58  |
| SMMPA04655 | 14 | 17 | 20 | 127 | 122 | 93  | 77 | 111 | 102 |
| SMMPA04656 | 10 | 20 | 15 | 72  | 80  | 50  | 56 | 51  | 64  |
| SMMPA04657 | 16 | 8  | 10 | 28  | 26  | 19  | 17 | 28  | 17  |
| SMMPA04658 | 17 | 23 | 21 | 59  | 53  | 34  | 24 | 35  | 25  |
| SMMPA04659 | 32 | 41 | 38 | 108 | 78  | 76  | 53 | 64  | 63  |
| SMMPA04660 | 20 | 22 | 20 | 36  | 18  | 36  | 29 | 36  | 45  |
| SMMPA04661 | 13 | 22 | 20 | 27  | 29  | 23  | 25 | 36  | 36  |
| SMMPA04662 | 28 | 22 | 19 | 56  | 44  | 40  | 38 | 56  | 42  |
| SMMPA04663 | 11 | 16 | 19 | 24  | 28  | 28  | 15 | 11  | 17  |
| SMMPA04664 | 16 | 12 | 8  | 7   | 4   | 3   | 9  | 12  | 11  |
| SMMPA04665 | 9  | 7  | 7  | 15  | 12  | 13  | 11 | 18  | 10  |
| SMMPA04666 | 15 | 16 | 8  | 41  | 38  | 25  | 14 | 17  | 20  |
| SMMPA04667 | 52 | 39 | 36 | 116 | 109 | 89  | 73 | 84  | 79  |
| SMMPA04668 | 77 | 76 | 59 | 52  | 49  | 49  | 63 | 59  | 68  |
| SMMPA04669 | 24 | 21 | 15 | 44  | 60  | 30  | 41 | 45  | 60  |
| SMMPA04670 | 31 | 33 | 34 | 66  | 74  | 57  | 56 | 74  | 61  |
| SMMPA04671 | 17 | 12 | 23 | 58  | 64  | 48  | 28 | 55  | 38  |
| SMMPA04672 | 24 | 30 | 32 | 86  | 80  | 53  | 52 | 68  | 56  |
| SMMPA04673 | 19 | 14 | 26 | 128 | 109 | 115 | 55 | 76  | 82  |
| SMMPA04674 | 19 | 25 | 28 | 112 | 122 | 100 | 54 | 60  | 75  |
| SMMPA04675 | 29 | 20 | 16 | 57  | 44  | 50  | 48 | 62  | 48  |
| SMMPA04676 | 18 | 15 | 14 | 37  | 25  | 24  | 28 | 31  | 47  |
| SMMPA04677 | 29 | 31 | 20 | 189 | 159 | 118 | 83 | 116 | 123 |

|            |    |    |    |     |     |     |     |     |     |
|------------|----|----|----|-----|-----|-----|-----|-----|-----|
| SMMPA04678 | 16 | 20 | 12 | 60  | 61  | 47  | 52  | 47  | 67  |
| SMMPA04679 | 15 | 12 | 9  | 47  | 37  | 21  | 40  | 50  | 39  |
| SMMPA04680 | 17 | 23 | 14 | 100 | 99  | 83  | 67  | 61  | 65  |
| SMMPA04681 | 26 | 37 | 17 | 407 | 394 | 396 | 181 | 253 | 206 |
| SMMPA04682 | 27 | 25 | 24 | 58  | 32  | 42  | 27  | 36  | 32  |
| SMMPA04683 | 24 | 32 | 22 | 69  | 50  | 62  | 57  | 65  | 66  |
| SMMPA04684 | 41 | 51 | 36 | 247 | 208 | 162 | 127 | 167 | 174 |
| SMMPA04685 | 13 | 20 | 16 | 52  | 59  | 56  | 36  | 31  | 35  |
| SMMPA04686 | 25 | 23 | 14 | 61  | 59  | 34  | 37  | 42  | 41  |
| SMMPA04687 | 17 | 17 | 22 | 78  | 72  | 49  | 34  | 40  | 43  |
| SMMPA04688 | 17 | 23 | 14 | 76  | 84  | 74  | 35  | 51  | 48  |
| SMMPA04689 | 28 | 31 | 24 | 141 | 140 | 110 | 54  | 81  | 92  |
| SMMPA04690 | 15 | 12 | 8  | 104 | 100 | 74  | 52  | 48  | 69  |
| SMMPA04691 | 31 | 32 | 25 | 151 | 112 | 117 | 78  | 78  | 69  |
| SMMPA04692 | 29 | 23 | 25 | 92  | 97  | 72  | 28  | 60  | 48  |
| SMMPA04693 | 20 | 26 | 20 | 74  | 71  | 77  | 36  | 56  | 48  |
| SMMPA04694 | 17 | 25 | 18 | 29  | 35  | 25  | 27  | 22  | 20  |
| SMMPA04695 | 26 | 31 | 28 | 397 | 339 | 287 | 119 | 168 | 181 |
| SMMPA04696 | 14 | 15 | 18 | 118 | 105 | 75  | 38  | 60  | 49  |
| SMMPA04697 | 24 | 21 | 22 | 32  | 30  | 29  | 20  | 20  | 23  |
| SMMPA04698 | 41 | 34 | 29 | 60  | 59  | 26  | 43  | 61  | 55  |
| SMMPA04699 | 16 | 12 | 11 | 45  | 42  | 33  | 31  | 32  | 30  |
| SMMPA04700 | 13 | 15 | 14 | 15  | 41  | 26  | 21  | 24  | 20  |
| SMMPA04701 | 18 | 13 | 12 | 37  | 48  | 31  | 20  | 28  | 27  |
| SMMPA04702 | 13 | 24 | 15 | 25  | 24  | 22  | 15  | 16  | 28  |
| SMMPA04703 | 22 | 37 | 29 | 78  | 70  | 69  | 41  | 64  | 63  |
| SMMPA04704 | 22 | 31 | 23 | 58  | 52  | 38  | 23  | 59  | 39  |
| SMMPA04705 | 22 | 15 | 19 | 20  | 9   | 14  | 24  | 29  | 36  |
| SMMPA04706 | 32 | 39 | 52 | 83  | 77  | 63  | 48  | 93  | 87  |
| SMMPA04707 | 19 | 18 | 15 | 57  | 54  | 31  | 21  | 35  | 32  |
| SMMPA04708 | 19 | 22 | 12 | 61  | 45  | 44  | 35  | 56  | 38  |
| SMMPA04709 | 21 | 23 | 27 | 210 | 186 | 133 | 81  | 118 | 98  |
| SMMPA04710 | 21 | 21 | 26 | 84  | 76  | 70  | 49  | 65  | 61  |
| SMMPA04711 | 14 | 19 | 16 | 202 | 186 | 173 | 95  | 131 | 112 |
| SMMPA04712 | 27 | 24 | 31 | 456 | 401 | 316 | 181 | 238 | 191 |
| SMMPA04713 | 11 | 15 | 14 | 34  | 40  | 38  | 18  | 32  | 27  |
| SMMPA04714 | 29 | 38 | 28 | 150 | 141 | 100 | 60  | 88  | 63  |
| SMMPA04715 | 25 | 27 | 30 | 69  | 75  | 48  | 32  | 48  | 54  |
| SMMPA04716 | 21 | 25 | 28 | 69  | 69  | 49  | 52  | 66  | 55  |
| SMMPA04717 | 56 | 58 | 53 | 92  | 69  | 68  | 73  | 70  | 64  |
| SMMPA04718 | 25 | 31 | 17 | 32  | 40  | 28  | 29  | 39  | 44  |

|            |    |    |    |     |     |     |     |     |     |
|------------|----|----|----|-----|-----|-----|-----|-----|-----|
| SMMPA04719 | 55 | 39 | 31 | 61  | 46  | 30  | 57  | 53  | 51  |
| SMMPA04720 | 29 | 23 | 23 | 30  | 33  | 32  | 35  | 46  | 46  |
| SMMPA04721 | 22 | 28 | 20 | 60  | 68  | 43  | 28  | 49  | 37  |
| SMMPA04722 | 34 | 25 | 22 | 59  | 44  | 58  | 33  | 53  | 48  |
| SMMPA04723 | 12 | 12 | 9  | 28  | 31  | 21  | 20  | 23  | 24  |
| SMMPA04724 | 15 | 17 | 7  | 40  | 27  | 30  | 35  | 38  | 35  |
| SMMPA04725 | 17 | 12 | 23 | 50  | 47  | 43  | 30  | 39  | 33  |
| SMMPA04726 | 25 | 27 | 26 | 35  | 38  | 27  | 35  | 46  | 44  |
| SMMPA04727 | 26 | 26 | 13 | 49  | 47  | 44  | 42  | 33  | 45  |
| SMMPA04728 | 25 | 33 | 28 | 54  | 33  | 42  | 37  | 53  | 44  |
| SMMPA04729 | 51 | 60 | 42 | 169 | 181 | 128 | 90  | 130 | 94  |
| SMMPA04730 | 12 | 15 | 17 | 33  | 18  | 23  | 13  | 27  | 21  |
| SMMPA04731 | 21 | 20 | 19 | 96  | 90  | 79  | 26  | 60  | 43  |
| SMMPA04732 | 26 | 31 | 29 | 78  | 69  | 58  | 42  | 33  | 51  |
| SMMPA04733 | 17 | 22 | 23 | 28  | 29  | 26  | 27  | 32  | 37  |
| SMMPA04734 | 29 | 21 | 21 | 34  | 30  | 27  | 24  | 32  | 22  |
| SMMPA04735 | 17 | 17 | 21 | 43  | 48  | 39  | 50  | 45  | 28  |
| SMMPA04736 | 23 | 28 | 25 | 22  | 27  | 32  | 21  | 43  | 47  |
| SMMPA04737 | 37 | 31 | 28 | 78  | 85  | 54  | 48  | 43  | 56  |
| SMMPA04738 | 16 | 13 | 20 | 44  | 35  | 35  | 26  | 27  | 23  |
| SMMPA04739 | 25 | 32 | 22 | 288 | 247 | 199 | 107 | 159 | 143 |
| SMMPA04740 | 35 | 46 | 52 | 84  | 59  | 60  | 38  | 60  | 69  |
| SMMPA04741 | 28 | 24 | 28 | 52  | 46  | 44  | 48  | 43  | 47  |
| SMMPA04742 | 24 | 29 | 27 | 103 | 98  | 65  | 47  | 73  | 75  |
| SMMPA04743 | 15 | 34 | 33 | 42  | 48  | 35  | 25  | 34  | 38  |
| SMMPA04744 | 15 | 8  | 10 | 36  | 31  | 29  | 18  | 20  | 33  |
| SMMPA04745 | 18 | 30 | 16 | 188 | 167 | 156 | 54  | 84  | 90  |
| SMMPA04746 | 29 | 31 | 33 | 89  | 85  | 64  | 44  | 70  | 62  |
| SMMPA04747 | 29 | 35 | 29 | 142 | 147 | 89  | 56  | 72  | 62  |
| SMMPA04748 | 23 | 29 | 24 | 182 | 173 | 131 | 69  | 86  | 61  |
| SMMPA04749 | 15 | 17 | 8  | 60  | 43  | 45  | 21  | 35  | 21  |
| SMMPA04750 | 9  | 12 | 15 | 108 | 75  | 80  | 45  | 54  | 47  |
| SMMPA04751 | 22 | 24 | 19 | 102 | 110 | 82  | 54  | 63  | 66  |
| SMMPA04752 | 20 | 19 | 26 | 60  | 48  | 47  | 44  | 53  | 54  |
| SMMPA04753 | 32 | 36 | 32 | 225 | 242 | 165 | 117 | 148 | 139 |
| SMMPA04754 | 12 | 23 | 10 | 95  | 103 | 92  | 15  | 35  | 26  |
| SMMPA04755 | 20 | 12 | 16 | 18  | 9   | 8   | 15  | 15  | 17  |
| SMMPA04756 | 3  | 3  | 9  | 1   | 5   | 3   | 5   | 5   | 11  |
| SMMPA04757 | 11 | 13 | 7  | 32  | 31  | 21  | 9   | 16  | 16  |
| SMMPA04758 | 9  | 13 | 18 | 25  | 25  | 23  | 24  | 30  | 19  |
| SMMPA04759 | 25 | 16 | 17 | 337 | 296 | 264 | 77  | 109 | 128 |

|            |    |    |    |     |     |     |    |    |    |
|------------|----|----|----|-----|-----|-----|----|----|----|
| SMMPA04760 | 14 | 25 | 12 | 88  | 89  | 82  | 31 | 35 | 41 |
| SMMPA04761 | 19 | 15 | 13 | 24  | 25  | 26  | 24 | 35 | 29 |
| SMMPA04762 | 16 | 16 | 14 | 17  | 20  | 14  | 16 | 23 | 32 |
| SMMPA04763 | 13 | 15 | 10 | 36  | 26  | 30  | 31 | 36 | 23 |
| SMMPA04764 | 14 | 15 | 14 | 24  | 20  | 17  | 15 | 36 | 30 |
| SMMPA04765 | 16 | 23 | 17 | 20  | 26  | 21  | 37 | 33 | 22 |
| SMMPA04766 | 24 | 19 | 20 | 28  | 25  | 25  | 19 | 30 | 21 |
| SMMPA04767 | 35 | 35 | 29 | 47  | 45  | 38  | 37 | 49 | 39 |
| SMMPA04768 | 15 | 9  | 8  | 16  | 9   | 13  | 23 | 16 | 20 |
| SMMPA04769 | 3  | 5  | 2  | 14  | 10  | 8   | 5  | 8  | 8  |
| SMMPA04770 | 3  | 10 | 9  | 14  | 9   | 17  | 9  | 9  | 12 |
| SMMPA04771 | 23 | 26 | 25 | 86  | 82  | 76  | 27 | 43 | 43 |
| SMMPA04772 | 22 | 20 | 17 | 24  | 30  | 32  | 26 | 31 | 23 |
| SMMPA04773 | 15 | 20 | 21 | 105 | 91  | 87  | 35 | 56 | 42 |
| SMMPA04774 | 24 | 24 | 35 | 70  | 69  | 41  | 46 | 50 | 60 |
| SMMPA04775 | 24 | 19 | 22 | 144 | 121 | 86  | 63 | 92 | 75 |
| SMMPA04776 | 14 | 16 | 22 | 187 | 165 | 101 | 72 | 89 | 84 |
| SMMPA04777 | 24 | 23 | 22 | 77  | 77  | 77  | 51 | 49 | 60 |
| SMMPA04778 | 31 | 28 | 30 | 25  | 33  | 17  | 18 | 34 | 27 |
| SMMPA04779 | 25 | 32 | 13 | 13  | 27  | 24  | 21 | 29 | 40 |
| SMMPA04780 | 51 | 46 | 44 | 37  | 27  | 24  | 56 | 61 | 79 |
| SMMPA04781 | 26 | 24 | 19 | 25  | 21  | 16  | 29 | 45 | 42 |
| SMMPA04782 | 9  | 11 | 13 | 10  | 15  | 18  | 6  | 18 | 14 |
| SMMPA04783 | 21 | 14 | 19 | 20  | 13  | 19  | 15 | 14 | 26 |
| SMMPA04784 | 18 | 32 | 28 | 15  | 13  | 13  | 25 | 34 | 33 |
| SMMPA04785 | 16 | 9  | 7  | 14  | 9   | 9   | 13 | 16 | 15 |
| SMMPA04786 | 15 | 15 | 23 | 18  | 21  | 16  | 32 | 39 | 44 |
| SMMPA04787 | 44 | 39 | 28 | 28  | 30  | 24  | 31 | 44 | 51 |
| SMMPA04788 | 19 | 29 | 13 | 39  | 31  | 29  | 14 | 24 | 17 |
| SMMPA04789 | 29 | 28 | 17 | 107 | 92  | 67  | 44 | 59 | 43 |
| SMMPA04790 | 28 | 35 | 37 | 30  | 45  | 38  | 47 | 33 | 51 |
| SMMPA04791 | 27 | 26 | 22 | 32  | 37  | 52  | 39 | 35 | 27 |
| SMMPA04792 | 23 | 14 | 12 | 34  | 26  | 24  | 18 | 22 | 24 |
| SMMPA04793 | 27 | 37 | 44 | 47  | 36  | 37  | 25 | 53 | 39 |
| SMMPA04794 | 23 | 21 | 17 | 50  | 32  | 34  | 24 | 26 | 35 |
| SMMPA04795 | 10 | 13 | 11 | 19  | 14  | 16  | 16 | 18 | 19 |
| SMMPA04796 | 15 | 17 | 18 | 23  | 23  | 29  | 20 | 37 | 34 |
| SMMPA04797 | 15 | 18 | 14 | 28  | 24  | 23  | 24 | 40 | 30 |
| SMMPA04798 | 16 | 19 | 21 | 41  | 40  | 29  | 31 | 48 | 45 |
| SMMPA04799 | 21 | 28 | 15 | 44  | 55  | 43  | 38 | 54 | 55 |
| SMMPA04800 | 15 | 19 | 14 | 111 | 101 | 87  | 44 | 51 | 50 |

|            |    |    |    |     |     |     |     |     |     |
|------------|----|----|----|-----|-----|-----|-----|-----|-----|
| SMMPA04801 | 22 | 19 | 16 | 56  | 51  | 40  | 34  | 33  | 40  |
| SMMPA04802 | 30 | 23 | 23 | 171 | 147 | 99  | 101 | 143 | 128 |
| SMMPA04803 | 23 | 36 | 22 | 50  | 50  | 47  | 39  | 46  | 56  |
| SMMPA04804 | 17 | 15 | 29 | 58  | 45  | 49  | 37  | 71  | 44  |
| SMMPA04805 | 12 | 6  | 17 | 61  | 45  | 48  | 25  | 42  | 51  |
| SMMPA04806 | 19 | 25 | 29 | 77  | 56  | 55  | 38  | 76  | 57  |
| SMMPA04807 | 13 | 9  | 5  | 18  | 20  | 10  | 13  | 16  | 17  |
| SMMPA04808 | 19 | 20 | 13 | 37  | 16  | 16  | 24  | 23  | 36  |
| SMMPA04809 | 31 | 27 | 30 | 72  | 70  | 62  | 35  | 50  | 50  |
| SMMPA04810 | 26 | 27 | 18 | 42  | 40  | 41  | 25  | 29  | 34  |
| SMMPA04811 | 12 | 16 | 15 | 41  | 31  | 32  | 24  | 36  | 49  |
| SMMPA04812 | 24 | 18 | 19 | 26  | 24  | 18  | 28  | 30  | 24  |
| SMMPA04813 | 29 | 25 | 25 | 27  | 29  | 27  | 27  | 27  | 34  |
| SMMPA04814 | 33 | 55 | 44 | 39  | 30  | 31  | 32  | 34  | 48  |
| SMMPA04815 | 11 | 5  | 6  | 15  | 11  | 8   | 15  | 21  | 12  |
| SMMPA04816 | 22 | 22 | 15 | 30  | 22  | 21  | 16  | 24  | 32  |
| SMMPA04817 | 16 | 25 | 18 | 17  | 35  | 24  | 60  | 57  | 68  |
| SMMPA04818 | 18 | 17 | 13 | 20  | 22  | 19  | 19  | 20  | 20  |
| SMMPA04819 | 34 | 34 | 24 | 24  | 21  | 27  | 25  | 28  | 24  |
| SMMPA04820 | 31 | 28 | 26 | 43  | 38  | 26  | 41  | 46  | 47  |
| SMMPA04821 | 25 | 16 | 15 | 32  | 37  | 29  | 37  | 42  | 38  |
| SMMPA04822 | 19 | 27 | 17 | 77  | 61  | 74  | 65  | 91  | 59  |
| SMMPA04823 | 30 | 39 | 31 | 74  | 59  | 53  | 51  | 69  | 59  |
| SMMPA04824 | 33 | 34 | 26 | 32  | 32  | 28  | 34  | 49  | 37  |
| SMMPA04825 | 37 | 38 | 49 | 212 | 210 | 190 | 97  | 151 | 129 |
| SMMPA04826 | 57 | 47 | 49 | 159 | 128 | 101 | 98  | 126 | 135 |
| SMMPA04827 | 32 | 18 | 21 | 36  | 37  | 28  | 33  | 42  | 42  |
| SMMPA04828 | 17 | 12 | 20 | 64  | 43  | 43  | 25  | 43  | 30  |
| SMMPA04829 | 24 | 26 | 12 | 53  | 44  | 33  | 24  | 26  | 37  |
| SMMPA04830 | 27 | 29 | 19 | 41  | 45  | 36  | 31  | 35  | 34  |
| SMMPA04831 | 30 | 36 | 30 | 123 | 120 | 96  | 76  | 88  | 81  |
| SMMPA04832 | 27 | 24 | 28 | 367 | 337 | 262 | 145 | 147 | 143 |
| SMMPA04833 | 11 | 9  | 12 | 69  | 71  | 52  | 24  | 38  | 42  |
| SMMPA04834 | 18 | 26 | 20 | 136 | 120 | 124 | 51  | 75  | 78  |
| SMMPA04835 | 33 | 40 | 29 | 201 | 219 | 188 | 182 | 206 | 198 |
| SMMPA04836 | 15 | 12 | 9  | 24  | 28  | 26  | 12  | 26  | 17  |
| SMMPA04837 | 23 | 23 | 13 | 109 | 123 | 94  | 70  | 105 | 80  |
| SMMPA04838 | 18 | 17 | 8  | 91  | 91  | 89  | 35  | 49  | 46  |
| SMMPA04839 | 24 | 33 | 16 | 132 | 88  | 92  | 47  | 78  | 70  |
| SMMPA04840 | 46 | 37 | 36 | 72  | 62  | 64  | 38  | 56  | 42  |
| SMMPA04841 | 10 | 15 | 10 | 44  | 54  | 47  | 15  | 17  | 21  |

|            |    |    |    |     |     |     |     |     |     |
|------------|----|----|----|-----|-----|-----|-----|-----|-----|
| SMMPA04842 | 34 | 30 | 22 | 23  | 29  | 28  | 23  | 40  | 37  |
| SMMPA04843 | 16 | 32 | 20 | 48  | 61  | 47  | 23  | 42  | 39  |
| SMMPA04844 | 4  | 5  | 2  | 10  | 10  | 3   | 9   | 12  | 13  |
| SMMPA04845 | 6  | 14 | 7  | 33  | 33  | 27  | 17  | 26  | 29  |
| SMMPA04846 | 21 | 18 | 31 | 180 | 177 | 126 | 75  | 136 | 131 |
| SMMPA04847 | 15 | 18 | 12 | 144 | 133 | 104 | 61  | 77  | 77  |
| SMMPA04848 | 7  | 4  | 10 | 19  | 20  | 16  | 13  | 18  | 20  |
| SMMPA04849 | 23 | 33 | 28 | 57  | 55  | 46  | 34  | 54  | 42  |
| SMMPA04850 | 20 | 12 | 20 | 42  | 33  | 23  | 39  | 40  | 36  |
| SMMPA04851 | 20 | 15 | 22 | 35  | 23  | 34  | 30  | 31  | 35  |
| SMMPA04852 | 16 | 15 | 17 | 20  | 23  | 22  | 19  | 43  | 29  |
| SMMPA04853 | 21 | 29 | 28 | 62  | 60  | 45  | 29  | 54  | 54  |
| SMMPA04854 | 23 | 23 | 22 | 72  | 74  | 56  | 41  | 52  | 43  |
| SMMPA04855 | 27 | 34 | 31 | 38  | 47  | 32  | 57  | 61  | 50  |
| SMMPA04856 | 7  | 5  | 3  | 3   | 2   | 4   | 12  | 9   | 11  |
| SMMPA04857 | 36 | 36 | 35 | 99  | 87  | 62  | 66  | 73  | 64  |
| SMMPA04858 | 22 | 22 | 21 | 51  | 66  | 50  | 26  | 37  | 28  |
| SMMPA04859 | 6  | 3  | 9  | 14  | 9   | 17  | 12  | 13  | 9   |
| SMMPA04860 | 21 | 21 | 16 | 83  | 77  | 82  | 53  | 67  | 52  |
| SMMPA04861 | 33 | 29 | 22 | 35  | 46  | 36  | 27  | 32  | 30  |
| SMMPA04862 | 39 | 25 | 30 | 100 | 94  | 78  | 57  | 58  | 68  |
| SMMPA04863 | 17 | 25 | 21 | 40  | 32  | 24  | 25  | 32  | 28  |
| SMMPA04864 | 21 | 34 | 19 | 55  | 56  | 37  | 40  | 48  | 67  |
| SMMPA04865 | 18 | 11 | 18 | 49  | 46  | 37  | 40  | 47  | 34  |
| SMMPA04866 | 6  | 4  | 8  | 75  | 62  | 74  | 34  | 67  | 38  |
| SMMPA04867 | 22 | 21 | 22 | 112 | 120 | 84  | 42  | 84  | 78  |
| SMMPA04868 | 18 | 13 | 8  | 32  | 41  | 30  | 42  | 35  | 43  |
| SMMPA04869 | 14 | 16 | 17 | 52  | 41  | 45  | 29  | 42  | 33  |
| SMMPA04870 | 7  | 18 | 18 | 186 | 147 | 132 | 88  | 121 | 95  |
| SMMPA04871 | 39 | 40 | 41 | 113 | 83  | 79  | 58  | 71  | 56  |
| SMMPA04872 | 19 | 31 | 19 | 209 | 187 | 155 | 98  | 111 | 107 |
| SMMPA04873 | 17 | 14 | 19 | 21  | 29  | 20  | 21  | 22  | 30  |
| SMMPA04874 | 16 | 16 | 17 | 59  | 49  | 36  | 46  | 50  | 55  |
| SMMPA04875 | 13 | 14 | 10 | 115 | 99  | 82  | 91  | 109 | 88  |
| SMMPA04876 | 25 | 26 | 13 | 164 | 136 | 114 | 94  | 155 | 130 |
| SMMPA04877 | 27 | 29 | 19 | 216 | 194 | 131 | 86  | 103 | 97  |
| SMMPA04878 | 22 | 36 | 38 | 202 | 201 | 136 | 107 | 136 | 127 |
| SMMPA04879 | 36 | 21 | 30 | 88  | 75  | 64  | 72  | 82  | 77  |
| SMMPA04880 | 30 | 34 | 34 | 68  | 83  | 53  | 71  | 81  | 69  |
| SMMPA04881 | 33 | 32 | 28 | 48  | 67  | 49  | 45  | 58  | 36  |
| SMMPA04882 | 21 | 23 | 23 | 23  | 19  | 25  | 23  | 37  | 29  |



|            |     |     |     |      |      |      |     |      |      |
|------------|-----|-----|-----|------|------|------|-----|------|------|
| SMMPA04883 | 26  | 29  | 31  | 47   | 41   | 52   | 30  | 54   | 43   |
| SMMPA04884 | 12  | 8   | 13  | 33   | 24   | 20   | 39  | 33   | 51   |
| SMMPA04885 | 24  | 34  | 21  | 78   | 73   | 71   | 35  | 72   | 64   |
| SMMPA04886 | 17  | 17  | 16  | 22   | 17   | 29   | 23  | 27   | 42   |
| SMMPA04887 | 22  | 32  | 16  | 38   | 18   | 24   | 34  | 31   | 54   |
| SMMPA04888 | 17  | 15  | 10  | 21   | 14   | 13   | 28  | 22   | 29   |
| SMMPA04889 | 10  | 18  | 13  | 32   | 23   | 23   | 34  | 26   | 44   |
| SMMPA04890 | 13  | 16  | 13  | 63   | 44   | 25   | 36  | 35   | 32   |
| SMMPA04891 | 9   | 12  | 9   | 16   | 15   | 25   | 20  | 20   | 20   |
| SMMPA04892 | 13  | 3   | 8   | 15   | 12   | 8    | 7   | 15   | 19   |
| SMMPA04893 | 6   | 1   | 4   | 9    | 4    | 4    | 12  | 8    | 14   |
| SMMPA04894 | 34  | 33  | 26  | 83   | 83   | 63   | 74  | 81   | 84   |
| SMMPA04895 | 16  | 16  | 13  | 108  | 86   | 64   | 48  | 53   | 48   |
| SMMPA04896 | 22  | 23  | 21  | 1078 | 1086 | 1046 | 880 | 1186 | 1113 |
| SMMPA04897 | 19  | 16  | 13  | 282  | 238  | 200  | 156 | 193  | 194  |
| SMMPA04898 | 36  | 29  | 26  | 56   | 61   | 41   | 11  | 25   | 33   |
| SMMPA04899 | 12  | 16  | 12  | 42   | 42   | 32   | 28  | 41   | 38   |
| SMMPA04900 | 19  | 15  | 21  | 126  | 117  | 63   | 49  | 55   | 48   |
| SMMPA04901 | 4   | 7   | 6   | 43   | 35   | 20   | 14  | 20   | 16   |
| SMMPA04902 | 5   | 2   | 2   | 7    | 4    | 1    | 4   | 2    | 8    |
| SMMPA04903 | 4   | 4   | 5   | 5    | 5    | 4    | 4   | 6    | 10   |
| SMMPA04904 | 14  | 17  | 14  | 141  | 115  | 84   | 67  | 85   | 88   |
| SMMPA04905 | 103 | 119 | 98  | 86   | 89   | 71   | 74  | 92   | 106  |
| SMMPA04906 | 84  | 105 | 109 | 253  | 252  | 180  | 134 | 175  | 156  |
| SMMPA04907 | 12  | 13  | 12  | 63   | 37   | 34   | 24  | 50   | 44   |
| SMMPA04908 | 14  | 15  | 16  | 50   | 58   | 32   | 26  | 38   | 31   |
| SMMPA04909 | 18  | 18  | 15  | 68   | 57   | 52   | 56  | 52   | 42   |
| SMMPA04910 | 25  | 23  | 27  | 25   | 26   | 20   | 49  | 46   | 38   |
| SMMPA04911 | 12  | 28  | 12  | 303  | 270  | 240  | 147 | 201  | 155  |
| SMMPA04912 | 4   | 3   | 3   | 32   | 30   | 37   | 10  | 15   | 11   |
| SMMPA04913 | 1   | 1   | 1   | 15   | 17   | 29   | 13  | 14   | 9    |
| SMMPA04914 | 18  | 18  | 26  | 15   | 26   | 26   | 29  | 26   | 31   |
| SMMPA04915 | 33  | 43  | 37  | 95   | 79   | 69   | 68  | 78   | 69   |
| SMMPA04916 | 20  | 18  | 10  | 81   | 70   | 65   | 50  | 73   | 78   |
| SMMPA04917 | 13  | 17  | 15  | 73   | 55   | 52   | 48  | 69   | 50   |
| SMMPA04918 | 14  | 9   | 10  | 23   | 44   | 23   | 18  | 41   | 36   |
| SMMPA04919 | 8   | 12  | 16  | 75   | 86   | 53   | 36  | 67   | 54   |
| SMMPA04920 | 10  | 6   | 8   | 28   | 28   | 18   | 28  | 28   | 19   |
| SMMPA04921 | 13  | 25  | 20  | 73   | 59   | 46   | 32  | 61   | 53   |
| SMMPA04922 | 17  | 20  | 22  | 104  | 98   | 77   | 60  | 73   | 61   |
| SMMPA04923 | 6   | 10  | 8   | 23   | 43   | 25   | 20  | 26   | 19   |

|            |    |    |    |     |     |     |     |     |     |
|------------|----|----|----|-----|-----|-----|-----|-----|-----|
| SMMPA04924 | 19 | 24 | 23 | 32  | 29  | 20  | 26  | 56  | 34  |
| SMMPA04925 | 21 | 19 | 14 | 138 | 131 | 114 | 83  | 87  | 87  |
| SMMPA04926 | 22 | 22 | 20 | 48  | 45  | 42  | 31  | 40  | 20  |
| SMMPA04927 | 30 | 33 | 24 | 38  | 56  | 33  | 36  | 54  | 47  |
| SMMPA04928 | 35 | 37 | 29 | 127 | 128 | 121 | 69  | 102 | 88  |
| SMMPA04929 | 63 | 63 | 54 | 92  | 97  | 77  | 80  | 97  | 98  |
| SMMPA04930 | 61 | 65 | 51 | 279 | 212 | 164 | 127 | 158 | 145 |
| SMMPA04931 | 13 | 15 | 10 | 33  | 22  | 26  | 19  | 19  | 12  |
| SMMPA04932 | 36 | 29 | 19 | 43  | 39  | 33  | 31  | 44  | 44  |
| SMMPA04933 | 38 | 32 | 27 | 139 | 153 | 117 | 81  | 82  | 87  |
| SMMPA04934 | 22 | 41 | 35 | 86  | 62  | 70  | 42  | 67  | 64  |
| SMMPA04935 | 20 | 15 | 23 | 72  | 69  | 52  | 48  | 77  | 81  |
| SMMPA04936 | 45 | 46 | 42 | 56  | 53  | 39  | 44  | 59  | 71  |
| SMMPA04937 | 29 | 24 | 23 | 54  | 44  | 45  | 43  | 44  | 41  |
| SMMPA04938 | 22 | 29 | 30 | 38  | 35  | 31  | 31  | 29  | 25  |
| SMMPA04939 | 39 | 50 | 32 | 61  | 55  | 46  | 42  | 59  | 65  |
| SMMPA04940 | 30 | 26 | 15 | 52  | 42  | 40  | 34  | 39  | 44  |
| SMMPA04941 | 8  | 9  | 11 | 22  | 17  | 8   | 17  | 20  | 20  |
| SMMPA04942 | 28 | 20 | 22 | 37  | 32  | 36  | 30  | 33  | 38  |
| SMMPA04943 | 23 | 19 | 24 | 50  | 37  | 39  | 29  | 23  | 29  |
| SMMPA04944 | 18 | 19 | 10 | 56  | 43  | 35  | 30  | 61  | 37  |
| SMMPA04945 | 22 | 22 | 17 | 24  | 16  | 33  | 20  | 30  | 24  |
| SMMPA04946 | 17 | 8  | 8  | 36  | 19  | 23  | 14  | 22  | 27  |
| SMMPA04947 | 25 | 19 | 13 | 29  | 33  | 25  | 28  | 29  | 47  |
| SMMPA04948 | 7  | 4  | 3  | 4   | 1   | 12  | 5   | 5   | 7   |
| SMMPA04949 | 10 | 15 | 9  | 22  | 20  | 20  | 12  | 23  | 10  |
| SMMPA04950 | 8  | 6  | 6  | 23  | 13  | 14  | 15  | 23  | 19  |
| SMMPA04951 | 2  | 4  | 3  | 13  | 15  | 10  | 5   | 6   | 8   |
| SMMPA04952 | 1  | 4  | 3  | 3   | 6   | 1   | 2   | 0   | 4   |
| SMMPA04953 | 12 | 16 | 6  | 10  | 5   | 16  | 7   | 10  | 7   |
| SMMPA04954 | 13 | 17 | 9  | 33  | 28  | 17  | 23  | 21  | 27  |
| SMMPA04955 | 13 | 23 | 12 | 88  | 88  | 69  | 46  | 66  | 50  |
| SMMPA04956 | 15 | 15 | 6  | 31  | 32  | 25  | 25  | 30  | 29  |
| SMMPA04957 | 22 | 14 | 15 | 156 | 110 | 107 | 56  | 79  | 82  |
| SMMPA04958 | 42 | 47 | 35 | 21  | 17  | 26  | 31  | 41  | 29  |
| SMMPA04959 | 37 | 28 | 33 | 26  | 13  | 22  | 17  | 31  | 32  |
| SMMPA04960 | 22 | 28 | 30 | 20  | 16  | 15  | 23  | 37  | 37  |
| SMMPA04961 | 33 | 33 | 35 | 42  | 27  | 18  | 36  | 46  | 38  |
| SMMPA04962 | 21 | 30 | 13 | 29  | 23  | 25  | 27  | 28  | 40  |
| SMMPA04963 | 12 | 18 | 11 | 42  | 44  | 39  | 21  | 48  | 38  |
| SMMPA04964 | 22 | 27 | 26 | 229 | 220 | 190 | 84  | 138 | 94  |

|            |    |    |    |     |     |     |     |     |     |
|------------|----|----|----|-----|-----|-----|-----|-----|-----|
| SMMPA04965 | 20 | 12 | 15 | 71  | 57  | 44  | 22  | 30  | 34  |
| SMMPA04966 | 25 | 10 | 15 | 45  | 59  | 34  | 23  | 24  | 25  |
| SMMPA04967 | 11 | 11 | 12 | 15  | 16  | 15  | 19  | 31  | 24  |
| SMMPA04968 | 5  | 8  | 9  | 7   | 8   | 4   | 10  | 12  | 9   |
| SMMPA04969 | 4  | 6  | 9  | 9   | 17  | 9   | 8   | 17  | 13  |
| SMMPA04970 | 15 | 11 | 13 | 17  | 12  | 12  | 16  | 14  | 22  |
| SMMPA04971 | 19 | 20 | 21 | 35  | 29  | 33  | 27  | 38  | 31  |
| SMMPA04972 | 5  | 13 | 12 | 10  | 13  | 6   | 9   | 18  | 19  |
| SMMPA04973 | 13 | 14 | 16 | 38  | 43  | 33  | 17  | 32  | 33  |
| SMMPA04974 | 23 | 12 | 15 | 37  | 33  | 26  | 25  | 24  | 15  |
| SMMPA04975 | 25 | 22 | 16 | 91  | 74  | 59  | 52  | 69  | 51  |
| SMMPA04976 | 22 | 34 | 25 | 85  | 69  | 71  | 59  | 55  | 48  |
| SMMPA04977 | 15 | 22 | 23 | 59  | 56  | 45  | 43  | 48  | 42  |
| SMMPA04978 | 24 | 26 | 27 | 128 | 106 | 79  | 76  | 91  | 73  |
| SMMPA04979 | 32 | 31 | 29 | 84  | 71  | 49  | 37  | 56  | 58  |
| SMMPA04980 | 12 | 15 | 17 | 44  | 26  | 20  | 20  | 32  | 31  |
| SMMPA04981 | 16 | 12 | 15 | 30  | 26  | 28  | 34  | 35  | 27  |
| SMMPA04982 | 47 | 51 | 45 | 48  | 72  | 47  | 39  | 39  | 37  |
| SMMPA04983 | 41 | 34 | 44 | 105 | 108 | 90  | 65  | 83  | 66  |
| SMMPA04984 | 20 | 24 | 24 | 85  | 82  | 64  | 50  | 72  | 58  |
| SMMPA04985 | 8  | 14 | 14 | 31  | 18  | 20  | 18  | 18  | 20  |
| SMMPA04986 | 32 | 22 | 21 | 47  | 28  | 29  | 25  | 39  | 24  |
| SMMPA04987 | 47 | 30 | 25 | 106 | 111 | 94  | 53  | 82  | 75  |
| SMMPA04988 | 28 | 34 | 29 | 118 | 105 | 86  | 58  | 77  | 70  |
| SMMPA04989 | 19 | 16 | 20 | 13  | 22  | 18  | 22  | 19  | 32  |
| SMMPA04990 | 26 | 18 | 21 | 40  | 33  | 39  | 21  | 38  | 33  |
| SMMPA04991 | 10 | 18 | 17 | 25  | 27  | 22  | 12  | 21  | 20  |
| SMMPA04992 | 8  | 9  | 13 | 49  | 37  | 30  | 18  | 19  | 18  |
| SMMPA04993 | 30 | 31 | 25 | 89  | 91  | 58  | 46  | 61  | 68  |
| SMMPA04994 | 15 | 31 | 20 | 58  | 48  | 29  | 46  | 39  | 46  |
| SMMPA04995 | 25 | 30 | 25 | 57  | 33  | 41  | 40  | 47  | 43  |
| SMMPA04996 | 20 | 21 | 24 | 38  | 38  | 44  | 32  | 36  | 51  |
| SMMPA04997 | 8  | 15 | 16 | 24  | 17  | 16  | 19  | 18  | 28  |
| SMMPA04998 | 3  | 21 | 10 | 5   | 7   | 11  | 17  | 18  | 18  |
| SMMPA04999 | 25 | 27 | 22 | 34  | 25  | 26  | 24  | 44  | 43  |
| SMMPA05000 | 13 | 14 | 16 | 23  | 25  | 17  | 21  | 16  | 18  |
| SMMPA05001 | 34 | 32 | 27 | 173 | 152 | 123 | 76  | 73  | 69  |
| SMMPA05002 | 13 | 12 | 8  | 56  | 56  | 44  | 22  | 27  | 31  |
| SMMPA05003 | 42 | 48 | 34 | 87  | 84  | 82  | 49  | 97  | 86  |
| SMMPA05004 | 60 | 63 | 62 | 147 | 153 | 101 | 104 | 152 | 134 |
| SMMPA05005 | 32 | 23 | 26 | 94  | 73  | 46  | 53  | 52  | 56  |

|            |    |    |    |     |     |     |     |     |     |
|------------|----|----|----|-----|-----|-----|-----|-----|-----|
| SMMPA05006 | 12 | 16 | 17 | 98  | 85  | 61  | 47  | 64  | 52  |
| SMMPA05007 | 21 | 27 | 26 | 154 | 134 | 114 | 54  | 103 | 63  |
| SMMPA05008 | 41 | 36 | 37 | 233 | 171 | 169 | 132 | 165 | 190 |
| SMMPA05009 | 25 | 16 | 15 | 71  | 68  | 63  | 37  | 30  | 35  |
| SMMPA05010 | 32 | 41 | 39 | 155 | 129 | 98  | 91  | 108 | 120 |
| SMMPA05011 | 26 | 46 | 33 | 197 | 156 | 132 | 88  | 140 | 114 |
| SMMPA05012 | 26 | 28 | 19 | 157 | 138 | 99  | 84  | 84  | 89  |
| SMMPA05013 | 25 | 31 | 29 | 65  | 54  | 54  | 22  | 55  | 55  |
| SMMPA05014 | 17 | 25 | 17 | 147 | 149 | 105 | 75  | 98  | 79  |
| SMMPA05015 | 20 | 17 | 22 | 40  | 42  | 38  | 23  | 30  | 28  |
| SMMPA05016 | 3  | 10 | 12 | 14  | 11  | 16  | 13  | 17  | 8   |
| SMMPA05017 | 16 | 15 | 23 | 70  | 57  | 60  | 43  | 47  | 45  |
| SMMPA05018 | 25 | 16 | 15 | 39  | 29  | 35  | 22  | 39  | 36  |
| SMMPA05019 | 19 | 19 | 18 | 95  | 86  | 84  | 42  | 48  | 32  |
| SMMPA05020 | 12 | 13 | 11 | 68  | 46  | 54  | 39  | 35  | 47  |
| SMMPA05021 | 28 | 22 | 25 | 104 | 97  | 78  | 47  | 69  | 56  |
| SMMPA05022 | 16 | 10 | 13 | 78  | 75  | 51  | 53  | 71  | 48  |
| SMMPA05023 | 28 | 22 | 21 | 193 | 183 | 163 | 93  | 143 | 110 |
| SMMPA05024 | 6  | 10 | 11 | 6   | 4   | 6   | 11  | 12  | 8   |
| SMMPA05025 | 13 | 8  | 13 | 14  | 13  | 11  | 14  | 20  | 21  |
| SMMPA05026 | 10 | 11 | 5  | 18  | 22  | 13  | 18  | 21  | 22  |
| SMMPA05027 | 27 | 25 | 15 | 59  | 54  | 46  | 27  | 38  | 34  |
| SMMPA05028 | 24 | 20 | 27 | 61  | 67  | 59  | 32  | 42  | 45  |
| SMMPA05029 | 17 | 27 | 17 | 28  | 36  | 29  | 30  | 33  | 32  |
| SMMPA05030 | 11 | 13 | 4  | 34  | 26  | 12  | 16  | 21  | 19  |
| SMMPA05031 | 18 | 22 | 14 | 32  | 26  | 30  | 39  | 45  | 48  |
| SMMPA05032 | 35 | 47 | 32 | 85  | 64  | 64  | 47  | 48  | 43  |
| SMMPA05033 | 23 | 33 | 25 | 146 | 111 | 97  | 100 | 134 | 105 |
| SMMPA05034 | 65 | 74 | 55 | 86  | 91  | 89  | 67  | 77  | 85  |
| SMMPA05035 | 26 | 18 | 15 | 27  | 25  | 31  | 37  | 34  | 35  |
| SMMPA05036 | 20 | 20 | 14 | 71  | 62  | 44  | 42  | 59  | 43  |
| SMMPA05037 | 8  | 6  | 10 | 52  | 49  | 38  | 30  | 41  | 27  |
| SMMPA05038 | 8  | 3  | 3  | 17  | 9   | 17  | 9   | 20  | 16  |
| SMMPA05039 | 10 | 15 | 13 | 123 | 118 | 98  | 58  | 89  | 65  |
| SMMPA05040 | 12 | 6  | 8  | 50  | 61  | 32  | 23  | 27  | 32  |
| SMMPA05041 | 21 | 15 | 15 | 129 | 103 | 99  | 52  | 73  | 63  |
| SMMPA05042 | 18 | 22 | 18 | 43  | 43  | 51  | 29  | 45  | 38  |
| SMMPA05043 | 14 | 19 | 8  | 44  | 40  | 33  | 30  | 53  | 37  |
| SMMPA05044 | 17 | 22 | 15 | 25  | 38  | 25  | 20  | 36  | 21  |
| SMMPA05045 | 21 | 35 | 23 | 69  | 55  | 49  | 38  | 45  | 45  |
| SMMPA05046 | 17 | 20 | 9  | 82  | 86  | 72  | 57  | 80  | 78  |

|            |    |    |    |     |     |     |    |    |    |
|------------|----|----|----|-----|-----|-----|----|----|----|
| SMMPA05047 | 12 | 13 | 10 | 40  | 25  | 20  | 13 | 21 | 29 |
| SMMPA05048 | 18 | 12 | 12 | 24  | 24  | 24  | 17 | 33 | 24 |
| SMMPA05049 | 13 | 18 | 19 | 72  | 47  | 46  | 27 | 26 | 21 |
| SMMPA05050 | 15 | 18 | 22 | 31  | 34  | 26  | 33 | 36 | 41 |
| SMMPA05051 | 30 | 16 | 22 | 88  | 89  | 65  | 56 | 66 | 45 |
| SMMPA05052 | 4  | 2  | 4  | 36  | 31  | 18  | 16 | 19 | 21 |
| SMMPA05053 | 9  | 5  | 7  | 20  | 26  | 18  | 25 | 25 | 22 |
| SMMPA05054 | 18 | 13 | 14 | 36  | 29  | 37  | 27 | 45 | 37 |
| SMMPA05055 | 5  | 6  | 4  | 9   | 13  | 15  | 10 | 12 | 9  |
| SMMPA05056 | 30 | 22 | 21 | 18  | 11  | 10  | 24 | 36 | 25 |
| SMMPA05057 | 7  | 8  | 7  | 18  | 21  | 13  | 13 | 8  | 10 |
| SMMPA05058 | 11 | 15 | 12 | 70  | 62  | 39  | 31 | 37 | 43 |
| SMMPA05059 | 7  | 8  | 8  | 21  | 21  | 28  | 13 | 26 | 22 |
| SMMPA05060 | 24 | 27 | 20 | 72  | 87  | 75  | 48 | 45 | 50 |
| SMMPA05061 | 25 | 20 | 10 | 46  | 36  | 47  | 31 | 49 | 38 |
| SMMPA05062 | 9  | 4  | 6  | 61  | 59  | 43  | 30 | 44 | 34 |
| SMMPA05063 | 19 | 14 | 17 | 59  | 59  | 55  | 37 | 37 | 36 |
| SMMPA05064 | 17 | 15 | 8  | 24  | 18  | 21  | 23 | 19 | 14 |
| SMMPA05065 | 10 | 9  | 6  | 44  | 31  | 23  | 17 | 35 | 24 |
| SMMPA05066 | 12 | 16 | 10 | 34  | 23  | 31  | 17 | 32 | 23 |
| SMMPA05067 | 14 | 24 | 16 | 217 | 200 | 151 | 87 | 87 | 82 |
| SMMPA05068 | 18 | 18 | 18 | 32  | 25  | 28  | 27 | 39 | 28 |
| SMMPA05069 | 13 | 5  | 7  | 55  | 65  | 34  | 37 | 51 | 40 |
| SMMPA05070 | 10 | 12 | 13 | 25  | 34  | 35  | 25 | 29 | 29 |
| SMMPA05071 | 12 | 11 | 10 | 32  | 26  | 31  | 21 | 19 | 30 |
| SMMPA05072 | 8  | 11 | 9  | 27  | 18  | 14  | 14 | 24 | 23 |
| SMMPA05073 | 3  | 0  | 3  | 2   | 1   | 0   | 2  | 1  | 1  |
| SMMPA05074 | 24 | 20 | 20 | 36  | 37  | 32  | 25 | 31 | 28 |
| SMMPA05075 | 41 | 31 | 36 | 40  | 32  | 37  | 24 | 45 | 36 |
| SMMPA05076 | 15 | 16 | 19 | 31  | 32  | 31  | 27 | 31 | 29 |
| SMMPA05077 | 27 | 22 | 25 | 35  | 25  | 33  | 22 | 22 | 27 |
| SMMPA05078 | 20 | 31 | 29 | 47  | 56  | 45  | 33 | 39 | 38 |
| SMMPA05079 | 34 | 29 | 31 | 26  | 31  | 24  | 35 | 47 | 25 |
| SMMPA05080 | 18 | 28 | 29 | 82  | 83  | 80  | 61 | 67 | 58 |
| SMMPA05081 | 42 | 56 | 37 | 48  | 44  | 31  | 45 | 61 | 50 |
| SMMPA05082 | 16 | 19 | 14 | 43  | 33  | 24  | 34 | 36 | 32 |
| SMMPA05083 | 21 | 17 | 15 | 51  | 28  | 41  | 28 | 40 | 45 |
| SMMPA05084 | 22 | 29 | 20 | 27  | 32  | 22  | 40 | 42 | 44 |
| SMMPA05085 | 27 | 34 | 23 | 41  | 31  | 43  | 29 | 47 | 51 |
| SMMPA05086 | 36 | 40 | 29 | 105 | 80  | 65  | 74 | 86 | 83 |
| SMMPA05087 | 20 | 18 | 17 | 37  | 33  | 32  | 29 | 27 | 23 |

|            |    |    |    |     |     |     |     |     |     |
|------------|----|----|----|-----|-----|-----|-----|-----|-----|
| SMMPA05088 | 42 | 54 | 38 | 102 | 53  | 63  | 49  | 71  | 64  |
| SMMPA05089 | 34 | 34 | 38 | 75  | 58  | 61  | 39  | 53  | 45  |
| SMMPA05090 | 56 | 47 | 46 | 93  | 84  | 70  | 69  | 76  | 71  |
| SMMPA05091 | 64 | 66 | 55 | 53  | 40  | 40  | 55  | 77  | 71  |
| SMMPA05092 | 22 | 22 | 27 | 24  | 36  | 35  | 24  | 31  | 40  |
| SMMPA05093 | 20 | 9  | 11 | 65  | 41  | 31  | 31  | 35  | 31  |
| SMMPA05094 | 30 | 27 | 27 | 40  | 42  | 38  | 34  | 54  | 56  |
| SMMPA05095 | 33 | 23 | 27 | 42  | 36  | 29  | 34  | 34  | 39  |
| SMMPA05096 | 9  | 15 | 17 | 27  | 24  | 27  | 31  | 39  | 42  |
| SMMPA05097 | 14 | 26 | 21 | 28  | 24  | 32  | 22  | 25  | 27  |
| SMMPA05098 | 22 | 26 | 15 | 29  | 29  | 26  | 33  | 48  | 40  |
| SMMPA05099 | 20 | 22 | 15 | 36  | 29  | 27  | 29  | 50  | 32  |
| SMMPA05100 | 19 | 20 | 8  | 49  | 47  | 38  | 34  | 38  | 38  |
| SMMPA05101 | 16 | 7  | 4  | 15  | 14  | 12  | 14  | 11  | 22  |
| SMMPA05102 | 12 | 13 | 9  | 26  | 17  | 23  | 21  | 31  | 24  |
| SMMPA05103 | 36 | 36 | 32 | 49  | 54  | 32  | 33  | 46  | 43  |
| SMMPA05104 | 7  | 9  | 8  | 8   | 6   | 16  | 13  | 15  | 19  |
| SMMPA05105 | 17 | 19 | 20 | 32  | 40  | 32  | 35  | 51  | 37  |
| SMMPA05106 | 11 | 12 | 19 | 20  | 19  | 16  | 25  | 32  | 33  |
| SMMPA05107 | 17 | 11 | 15 | 18  | 24  | 24  | 24  | 35  | 28  |
| SMMPA05108 | 17 | 21 | 14 | 24  | 16  | 23  | 13  | 16  | 22  |
| SMMPA05109 | 15 | 21 | 9  | 10  | 11  | 15  | 13  | 24  | 23  |
| SMMPA05110 | 31 | 24 | 28 | 32  | 29  | 35  | 17  | 39  | 23  |
| SMMPA05111 | 33 | 27 | 29 | 28  | 37  | 32  | 19  | 42  | 38  |
| SMMPA05112 | 1  | 1  | 6  | 27  | 24  | 26  | 17  | 21  | 22  |
| SMMPA05113 | 27 | 26 | 19 | 463 | 398 | 383 | 197 | 257 | 194 |
| SMMPA05114 | 11 | 10 | 11 | 45  | 53  | 43  | 28  | 39  | 29  |
| SMMPA05115 | 14 | 30 | 21 | 278 | 211 | 201 | 98  | 168 | 117 |
| SMMPA05116 | 23 | 19 | 18 | 63  | 53  | 57  | 38  | 52  | 47  |
| SMMPA05117 | 25 | 24 | 30 | 101 | 94  | 80  | 48  | 77  | 68  |
| SMMPA05118 | 25 | 28 | 31 | 87  | 75  | 62  | 45  | 78  | 65  |
| SMMPA05119 | 10 | 15 | 13 | 20  | 16  | 15  | 8   | 20  | 22  |
| SMMPA05120 | 21 | 20 | 11 | 24  | 23  | 23  | 20  | 43  | 23  |
| SMMPA05121 | 32 | 39 | 33 | 91  | 74  | 71  | 48  | 67  | 53  |
| SMMPA05122 | 27 | 26 | 26 | 55  | 40  | 35  | 33  | 58  | 49  |
| SMMPA05123 | 22 | 24 | 12 | 13  | 20  | 15  | 17  | 28  | 17  |
| SMMPA05124 | 12 | 10 | 21 | 22  | 14  | 23  | 24  | 31  | 41  |
| SMMPA05125 | 17 | 12 | 8  | 19  | 19  | 14  | 18  | 18  | 23  |
| SMMPA05126 | 21 | 28 | 15 | 57  | 43  | 43  | 34  | 54  | 34  |
| SMMPA05127 | 23 | 27 | 26 | 28  | 26  | 20  | 48  | 48  | 50  |
| SMMPA05128 | 16 | 11 | 12 | 31  | 27  | 16  | 25  | 35  | 30  |

|            |     |     |     |     |     |     |     |     |     |
|------------|-----|-----|-----|-----|-----|-----|-----|-----|-----|
| SMMPA05129 | 19  | 16  | 21  | 23  | 30  | 27  | 24  | 39  | 32  |
| SMMPA05130 | 10  | 8   | 14  | 32  | 23  | 32  | 13  | 15  | 24  |
| SMMPA05131 | 19  | 14  | 19  | 81  | 58  | 54  | 29  | 35  | 33  |
| SMMPA05132 | 20  | 7   | 15  | 33  | 25  | 24  | 15  | 16  | 20  |
| SMMPA05133 | 26  | 38  | 16  | 33  | 33  | 25  | 31  | 33  | 36  |
| SMMPA05134 | 12  | 22  | 11  | 44  | 38  | 44  | 32  | 30  | 29  |
| SMMPA05135 | 10  | 18  | 10  | 38  | 36  | 37  | 24  | 30  | 35  |
| SMMPA05136 | 39  | 33  | 31  | 80  | 70  | 52  | 59  | 44  | 74  |
| SMMPA05137 | 21  | 20  | 13  | 19  | 19  | 17  | 26  | 27  | 24  |
| SMMPA05138 | 30  | 28  | 24  | 25  | 18  | 34  | 23  | 21  | 31  |
| SMMPA05139 | 24  | 26  | 21  | 44  | 33  | 28  | 22  | 35  | 42  |
| SMMPA05140 | 24  | 26  | 22  | 53  | 44  | 36  | 36  | 35  | 73  |
| SMMPA05141 | 22  | 19  | 17  | 95  | 89  | 80  | 26  | 36  | 29  |
| SMMPA05142 | 3   | 8   | 3   | 5   | 8   | 10  | 12  | 15  | 17  |
| SMMPA05143 | 22  | 23  | 20  | 72  | 62  | 47  | 32  | 50  | 30  |
| SMMPA05144 | 46  | 34  | 25  | 21  | 35  | 33  | 34  | 54  | 47  |
| SMMPA05145 | 18  | 14  | 11  | 20  | 24  | 19  | 17  | 21  | 23  |
| SMMPA05146 | 16  | 19  | 20  | 18  | 19  | 19  | 24  | 20  | 26  |
| SMMPA05147 | 25  | 35  | 26  | 101 | 102 | 88  | 77  | 80  | 85  |
| SMMPA05148 | 7   | 4   | 5   | 14  | 10  | 9   | 8   | 14  | 13  |
| SMMPA05149 | 13  | 20  | 11  | 38  | 52  | 35  | 27  | 36  | 37  |
| SMMPA05150 | 9   | 9   | 11  | 20  | 13  | 14  | 24  | 25  | 24  |
| SMMPA05151 | 39  | 30  | 25  | 97  | 87  | 87  | 54  | 69  | 81  |
| SMMPA05152 | 23  | 16  | 16  | 13  | 19  | 13  | 12  | 17  | 18  |
| SMMPA05153 | 9   | 7   | 6   | 49  | 29  | 34  | 29  | 25  | 23  |
| SMMPA05154 | 23  | 28  | 16  | 37  | 33  | 28  | 19  | 23  | 17  |
| SMMPA05155 | 14  | 18  | 27  | 54  | 44  | 47  | 38  | 44  | 39  |
| SMMPA05156 | 10  | 15  | 11  | 26  | 24  | 20  | 10  | 11  | 18  |
| SMMPA05157 | 35  | 29  | 27  | 47  | 43  | 23  | 33  | 35  | 43  |
| SMMPA05158 | 26  | 21  | 16  | 94  | 69  | 69  | 45  | 60  | 62  |
| SMMPA05159 | 18  | 19  | 13  | 72  | 52  | 50  | 27  | 41  | 37  |
| SMMPA05160 | 17  | 13  | 26  | 76  | 73  | 64  | 63  | 81  | 73  |
| SMMPA05161 | 14  | 15  | 15  | 34  | 30  | 22  | 14  | 6   | 15  |
| SMMPA05162 | 27  | 30  | 27  | 176 | 191 | 160 | 90  | 116 | 96  |
| SMMPA05163 | 17  | 25  | 21  | 78  | 85  | 67  | 42  | 54  | 51  |
| SMMPA05164 | 18  | 24  | 22  | 118 | 86  | 58  | 34  | 52  | 62  |
| SMMPA05165 | 19  | 23  | 22  | 29  | 18  | 22  | 26  | 38  | 22  |
| SMMPA05166 | 17  | 17  | 11  | 11  | 8   | 14  | 18  | 25  | 22  |
| SMMPA05167 | 111 | 142 | 110 | 116 | 104 | 82  | 109 | 108 | 131 |
| SMMPA05168 | 41  | 31  | 55  | 22  | 26  | 24  | 51  | 68  | 56  |
| SMMPA05169 | 45  | 42  | 28  | 50  | 59  | 28  | 69  | 90  | 87  |

|            |     |     |     |     |     |     |     |     |     |
|------------|-----|-----|-----|-----|-----|-----|-----|-----|-----|
| SMMPA05170 | 38  | 36  | 20  | 48  | 35  | 35  | 32  | 28  | 35  |
| SMMPA05171 | 68  | 59  | 45  | 68  | 53  | 50  | 52  | 60  | 60  |
| SMMPA05172 | 138 | 184 | 136 | 120 | 109 | 90  | 123 | 158 | 206 |
| SMMPA05173 | 20  | 7   | 13  | 13  | 7   | 8   | 15  | 16  | 20  |
| SMMPA05174 | 49  | 49  | 56  | 55  | 38  | 47  | 45  | 51  | 60  |
| SMMPA05175 | 17  | 29  | 20  | 19  | 11  | 10  | 10  | 17  | 22  |
| SMMPA05176 | 37  | 26  | 23  | 33  | 40  | 50  | 33  | 41  | 42  |
| SMMPA05177 | 60  | 62  | 60  | 55  | 56  | 52  | 53  | 66  | 65  |
| SMMPA05178 | 14  | 13  | 6   | 12  | 6   | 11  | 8   | 22  | 15  |
| SMMPA05179 | 29  | 33  | 28  | 39  | 39  | 39  | 48  | 49  | 43  |
| SMMPA05180 | 20  | 18  | 28  | 93  | 68  | 66  | 43  | 76  | 61  |
| SMMPA05181 | 12  | 16  | 9   | 6   | 8   | 6   | 12  | 12  | 14  |
| SMMPA05182 | 13  | 9   | 12  | 13  | 11  | 8   | 15  | 13  | 19  |
| SMMPA05183 | 26  | 26  | 24  | 74  | 81  | 55  | 44  | 37  | 53  |
| SMMPA05184 | 27  | 36  | 28  | 15  | 20  | 14  | 25  | 25  | 33  |
| SMMPA05185 | 37  | 49  | 41  | 314 | 295 | 252 | 146 | 216 | 204 |
| SMMPA05186 | 23  | 25  | 21  | 64  | 40  | 34  | 25  | 42  | 35  |
| SMMPA05187 | 10  | 13  | 16  | 498 | 469 | 338 | 178 | 197 | 190 |
| SMMPA05188 | 24  | 20  | 16  | 430 | 404 | 337 | 135 | 204 | 174 |
| SMMPA05189 | 12  | 5   | 4   | 96  | 88  | 67  | 41  | 74  | 67  |
| SMMPA05190 | 21  | 27  | 22  | 34  | 23  | 24  | 34  | 44  | 25  |
| SMMPA05191 | 30  | 24  | 19  | 102 | 95  | 69  | 39  | 47  | 39  |
| SMMPA05192 | 16  | 29  | 26  | 121 | 129 | 102 | 63  | 71  | 80  |
| SMMPA05193 | 14  | 12  | 15  | 52  | 30  | 36  | 21  | 43  | 32  |
| SMMPA05194 | 21  | 19  | 18  | 43  | 61  | 51  | 24  | 35  | 34  |
| SMMPA05195 | 36  | 46  | 38  | 66  | 61  | 36  | 39  | 50  | 61  |
| SMMPA05196 | 20  | 31  | 19  | 63  | 54  | 39  | 43  | 47  | 54  |
| SMMPA05197 | 12  | 16  | 13  | 29  | 15  | 25  | 26  | 16  | 21  |
| SMMPA05198 | 16  | 14  | 21  | 65  | 56  | 49  | 34  | 48  | 35  |
| SMMPA05199 | 19  | 23  | 18  | 19  | 17  | 21  | 23  | 34  | 21  |
| SMMPA05200 | 26  | 27  | 22  | 115 | 90  | 76  | 62  | 85  | 64  |
| SMMPA05201 | 31  | 23  | 24  | 93  | 89  | 65  | 34  | 57  | 45  |
| SMMPA05202 | 23  | 27  | 18  | 126 | 123 | 98  | 45  | 78  | 71  |
| SMMPA05203 | 26  | 29  | 19  | 55  | 49  | 48  | 34  | 49  | 52  |
| SMMPA05204 | 13  | 12  | 15  | 75  | 74  | 57  | 34  | 53  | 47  |
| SMMPA05205 | 11  | 7   | 7   | 52  | 43  | 27  | 14  | 20  | 19  |
| SMMPA05206 | 24  | 25  | 23  | 61  | 60  | 61  | 38  | 51  | 56  |
| SMMPA05207 | 27  | 28  | 25  | 124 | 101 | 82  | 55  | 61  | 74  |
| SMMPA05208 | 20  | 20  | 13  | 14  | 26  | 19  | 18  | 26  | 24  |
| SMMPA05209 | 30  | 26  | 21  | 49  | 52  | 43  | 30  | 34  | 20  |
| SMMPA05210 | 15  | 15  | 8   | 55  | 50  | 46  | 27  | 24  | 28  |



|            |    |    |    |     |     |     |     |     |     |
|------------|----|----|----|-----|-----|-----|-----|-----|-----|
| SMMPA05211 | 25 | 31 | 23 | 137 | 119 | 80  | 66  | 88  | 74  |
| SMMPA05212 | 46 | 37 | 35 | 99  | 70  | 73  | 57  | 79  | 63  |
| SMMPA05213 | 44 | 51 | 40 | 428 | 400 | 370 | 297 | 342 | 305 |
| SMMPA05214 | 17 | 17 | 10 | 36  | 56  | 36  | 25  | 35  | 29  |
| SMMPA05215 | 57 | 62 | 59 | 152 | 141 | 122 | 79  | 136 | 112 |
| SMMPA05216 | 24 | 22 | 25 | 171 | 165 | 128 | 90  | 106 | 87  |
| SMMPA05217 | 5  | 3  | 2  | 48  | 34  | 25  | 12  | 28  | 13  |
| SMMPA05218 | 4  | 2  | 2  | 15  | 10  | 9   | 8   | 4   | 5   |
| SMMPA05219 | 19 | 20 | 14 | 31  | 15  | 29  | 15  | 31  | 35  |
| SMMPA05220 | 26 | 22 | 15 | 204 | 199 | 135 | 71  | 97  | 112 |
| SMMPA05221 | 7  | 12 | 15 | 21  | 14  | 16  | 21  | 18  | 21  |
| SMMPA05222 | 8  | 13 | 7  | 27  | 33  | 31  | 13  | 33  | 29  |
| SMMPA05223 | 7  | 8  | 8  | 24  | 20  | 18  | 2   | 12  | 10  |
| SMMPA05224 | 15 | 12 | 12 | 44  | 58  | 37  | 20  | 43  | 34  |
| SMMPA05225 | 10 | 15 | 14 | 27  | 35  | 25  | 14  | 28  | 19  |
| SMMPA05226 | 22 | 37 | 20 | 77  | 78  | 73  | 69  | 86  | 85  |
| SMMPA05227 | 24 | 33 | 18 | 190 | 143 | 145 | 50  | 78  | 95  |
| SMMPA05228 | 41 | 46 | 37 | 89  | 71  | 87  | 98  | 101 | 90  |
| SMMPA05229 | 51 | 64 | 50 | 101 | 84  | 84  | 83  | 130 | 114 |
| SMMPA05230 | 17 | 16 | 26 | 158 | 148 | 118 | 63  | 88  | 77  |
| SMMPA05231 | 28 | 29 | 20 | 68  | 84  | 74  | 26  | 55  | 53  |
| SMMPA05232 | 22 | 12 | 18 | 20  | 20  | 11  | 22  | 23  | 24  |
| SMMPA05233 | 30 | 30 | 13 | 33  | 21  | 24  | 28  | 37  | 31  |
| SMMPA05234 | 78 | 92 | 73 | 86  | 65  | 66  | 91  | 164 | 131 |
| SMMPA05235 | 16 | 15 | 9  | 44  | 55  | 50  | 35  | 53  | 40  |
| SMMPA05236 | 7  | 13 | 13 | 19  | 23  | 18  | 27  | 25  | 28  |
| SMMPA05237 | 11 | 13 | 3  | 9   | 10  | 10  | 20  | 20  | 19  |
| SMMPA05238 | 19 | 16 | 18 | 20  | 22  | 23  | 27  | 34  | 31  |
| SMMPA05239 | 21 | 6  | 16 | 16  | 12  | 16  | 22  | 21  | 32  |
| SMMPA05240 | 12 | 11 | 5  | 14  | 13  | 11  | 11  | 23  | 14  |
| SMMPA05241 | 10 | 16 | 14 | 17  | 10  | 16  | 22  | 38  | 28  |
| SMMPA05242 | 0  | 2  | 2  | 1   | 9   | 3   | 2   | 6   | 7   |
| SMMPA05243 | 19 | 20 | 17 | 62  | 56  | 48  | 18  | 36  | 33  |
| SMMPA05244 | 21 | 12 | 15 | 88  | 84  | 50  | 36  | 59  | 56  |
| SMMPA05245 | 3  | 5  | 5  | 30  | 18  | 21  | 10  | 21  | 22  |
| SMMPA05246 | 12 | 7  | 18 | 54  | 67  | 47  | 36  | 28  | 40  |
| SMMPA05247 | 34 | 30 | 31 | 212 | 159 | 141 | 107 | 150 | 109 |
| SMMPA05248 | 5  | 7  | 7  | 10  | 6   | 7   | 10  | 13  | 10  |
| SMMPA05249 | 24 | 21 | 26 | 162 | 154 | 108 | 74  | 93  | 94  |
| SMMPA05250 | 17 | 21 | 15 | 93  | 88  | 49  | 39  | 49  | 67  |
| SMMPA05251 | 16 | 17 | 16 | 79  | 73  | 59  | 51  | 56  | 46  |

|            |    |    |    |     |     |     |    |    |    |
|------------|----|----|----|-----|-----|-----|----|----|----|
| SMMPA05252 | 25 | 25 | 20 | 83  | 95  | 78  | 37 | 53 | 42 |
| SMMPA05253 | 30 | 26 | 23 | 60  | 59  | 54  | 49 | 51 | 54 |
| SMMPA05254 | 14 | 9  | 7  | 28  | 26  | 18  | 16 | 32 | 33 |
| SMMPA05255 | 21 | 21 | 19 | 105 | 92  | 54  | 35 | 48 | 55 |
| SMMPA05256 | 13 | 11 | 10 | 56  | 44  | 40  | 31 | 32 | 31 |
| SMMPA05257 | 11 | 7  | 8  | 28  | 36  | 27  | 16 | 18 | 26 |
| SMMPA05258 | 19 | 17 | 21 | 56  | 56  | 49  | 38 | 52 | 36 |
| SMMPA05259 | 6  | 6  | 5  | 59  | 33  | 29  | 19 | 26 | 24 |
| SMMPA05260 | 14 | 10 | 9  | 35  | 30  | 22  | 22 | 24 | 20 |
| SMMPA05261 | 30 | 22 | 34 | 160 | 145 | 112 | 54 | 77 | 78 |
| SMMPA05262 | 12 | 19 | 18 | 34  | 35  | 33  | 48 | 51 | 45 |
| SMMPA05263 | 34 | 35 | 25 | 40  | 36  | 26  | 28 | 34 | 38 |
| SMMPA05264 | 18 | 14 | 23 | 79  | 71  | 42  | 45 | 54 | 50 |
| SMMPA05265 | 18 | 14 | 18 | 57  | 36  | 50  | 65 | 61 | 66 |
| SMMPA05266 | 11 | 5  | 7  | 26  | 17  | 25  | 21 | 14 | 11 |
| SMMPA05267 | 20 | 15 | 18 | 63  | 67  | 52  | 52 | 42 | 37 |
| SMMPA05268 | 15 | 17 | 12 | 31  | 40  | 20  | 30 | 38 | 25 |
| SMMPA05269 | 19 | 25 | 17 | 90  | 95  | 85  | 69 | 77 | 65 |
| SMMPA05270 | 29 | 28 | 24 | 71  | 61  | 49  | 38 | 57 | 46 |
| SMMPA05271 | 24 | 22 | 23 | 29  | 27  | 23  | 35 | 41 | 44 |
| SMMPA05272 | 23 | 19 | 32 | 27  | 17  | 21  | 37 | 41 | 46 |
| SMMPA05273 | 25 | 14 | 21 | 12  | 16  | 24  | 20 | 39 | 34 |
| SMMPA05274 | 21 | 47 | 37 | 47  | 42  | 42  | 41 | 50 | 53 |
| SMMPA05275 | 18 | 12 | 16 | 17  | 14  | 10  | 23 | 21 | 20 |
| SMMPA05276 | 30 | 38 | 22 | 27  | 16  | 23  | 23 | 42 | 30 |
| SMMPA05277 | 33 | 36 | 28 | 128 | 110 | 90  | 69 | 76 | 72 |
| SMMPA05278 | 26 | 23 | 35 | 42  | 39  | 33  | 31 | 41 | 51 |
| SMMPA05279 | 24 | 23 | 22 | 36  | 17  | 20  | 36 | 28 | 34 |
| SMMPA05280 | 18 | 17 | 19 | 27  | 22  | 19  | 27 | 30 | 26 |
| SMMPA05281 | 11 | 11 | 4  | 17  | 7   | 13  | 15 | 14 | 12 |
| SMMPA05282 | 12 | 5  | 7  | 21  | 12  | 14  | 26 | 21 | 18 |
| SMMPA05283 | 6  | 14 | 8  | 3   | 8   | 8   | 13 | 13 | 18 |
| SMMPA05284 | 9  | 12 | 14 | 7   | 14  | 20  | 11 | 19 | 18 |
| SMMPA05285 | 9  | 14 | 10 | 20  | 16  | 10  | 20 | 17 | 21 |
| SMMPA05286 | 2  | 1  | 2  | 0   | 6   | 5   | 2  | 1  | 5  |
| SMMPA05287 | 7  | 11 | 8  | 14  | 11  | 9   | 12 | 14 | 8  |
| SMMPA05288 | 4  | 4  | 8  | 13  | 21  | 10  | 14 | 13 | 15 |
| SMMPA05289 | 9  | 19 | 12 | 13  | 21  | 12  | 12 | 28 | 24 |
| SMMPA05290 | 7  | 13 | 18 | 18  | 19  | 20  | 22 | 31 | 26 |
| SMMPA05291 | 13 | 9  | 9  | 14  | 15  | 14  | 11 | 36 | 25 |
| SMMPA05292 | 29 | 19 | 28 | 176 | 150 | 122 | 56 | 66 | 75 |

|            |    |    |    |     |     |     |     |     |     |
|------------|----|----|----|-----|-----|-----|-----|-----|-----|
| SMMPA05293 | 31 | 33 | 23 | 56  | 52  | 50  | 59  | 54  | 56  |
| SMMPA05294 | 23 | 30 | 27 | 128 | 104 | 86  | 53  | 91  | 84  |
| SMMPA05295 | 39 | 36 | 35 | 88  | 90  | 71  | 55  | 57  | 69  |
| SMMPA05296 | 23 | 30 | 32 | 88  | 48  | 55  | 39  | 64  | 68  |
| SMMPA05297 | 18 | 18 | 16 | 42  | 62  | 48  | 49  | 40  | 50  |
| SMMPA05298 | 31 | 32 | 24 | 61  | 60  | 53  | 46  | 68  | 57  |
| SMMPA05299 | 17 | 25 | 16 | 49  | 40  | 46  | 28  | 57  | 56  |
| SMMPA05300 | 23 | 36 | 27 | 300 | 242 | 200 | 170 | 214 | 212 |
| SMMPA05301 | 29 | 31 | 24 | 254 | 192 | 165 | 111 | 157 | 136 |
| SMMPA05302 | 32 | 29 | 28 | 176 | 154 | 107 | 91  | 134 | 101 |
| SMMPA05303 | 35 | 19 | 31 | 63  | 51  | 62  | 66  | 80  | 84  |
| SMMPA05304 | 34 | 33 | 26 | 45  | 37  | 32  | 55  | 78  | 67  |
| SMMPA05305 | 14 | 19 | 14 | 79  | 89  | 54  | 43  | 51  | 72  |
| SMMPA05306 | 24 | 26 | 12 | 39  | 56  | 46  | 39  | 47  | 58  |
| SMMPA05307 | 23 | 11 | 16 | 132 | 106 | 68  | 59  | 86  | 88  |
| SMMPA05308 | 14 | 12 | 15 | 35  | 32  | 44  | 29  | 37  | 34  |
| SMMPA05309 | 11 | 26 | 11 | 53  | 54  | 42  | 29  | 39  | 41  |
| SMMPA05310 | 12 | 14 | 23 | 97  | 64  | 59  | 56  | 48  | 56  |
| SMMPA05311 | 14 | 18 | 17 | 62  | 55  | 55  | 57  | 54  | 56  |
| SMMPA05312 | 52 | 55 | 52 | 182 | 159 | 125 | 94  | 160 | 148 |
| SMMPA05313 | 23 | 24 | 28 | 37  | 39  | 29  | 37  | 49  | 57  |
| SMMPA05314 | 24 | 23 | 27 | 29  | 41  | 28  | 33  | 48  | 42  |
| SMMPA05315 | 8  | 16 | 12 | 19  | 9   | 21  | 18  | 22  | 24  |
| SMMPA05316 | 8  | 15 | 15 | 9   | 8   | 9   | 13  | 17  | 20  |
| SMMPA05317 | 26 | 23 | 31 | 28  | 33  | 37  | 36  | 42  | 39  |
| SMMPA05318 | 33 | 27 | 28 | 39  | 41  | 37  | 51  | 37  | 48  |
| SMMPA05319 | 22 | 18 | 29 | 30  | 37  | 32  | 33  | 39  | 50  |
| SMMPA05320 | 28 | 30 | 23 | 35  | 48  | 31  | 30  | 42  | 34  |
| SMMPA05321 | 22 | 23 | 16 | 28  | 23  | 18  | 24  | 34  | 34  |
| SMMPA05322 | 30 | 29 | 30 | 45  | 34  | 29  | 34  | 50  | 41  |
| SMMPA05323 | 21 | 13 | 14 | 21  | 11  | 15  | 14  | 34  | 20  |
| SMMPA05324 | 29 | 16 | 17 | 46  | 56  | 36  | 29  | 28  | 32  |
| SMMPA05325 | 12 | 19 | 16 | 29  | 30  | 23  | 13  | 16  | 11  |
| SMMPA05326 | 14 | 17 | 6  | 18  | 22  | 28  | 19  | 27  | 19  |
| SMMPA05327 | 15 | 18 | 23 | 31  | 31  | 26  | 27  | 30  | 36  |
| SMMPA05328 | 16 | 17 | 19 | 44  | 25  | 32  | 23  | 30  | 31  |
| SMMPA05329 | 48 | 43 | 40 | 59  | 68  | 66  | 78  | 115 | 95  |
| SMMPA05330 | 22 | 19 | 19 | 35  | 28  | 31  | 25  | 30  | 28  |
| SMMPA05331 | 18 | 29 | 21 | 27  | 17  | 20  | 26  | 26  | 39  |
| SMMPA05332 | 31 | 31 | 36 | 66  | 45  | 51  | 35  | 43  | 48  |
| SMMPA05333 | 15 | 17 | 20 | 8   | 23  | 14  | 20  | 24  | 17  |

|            |    |     |    |     |     |     |     |     |     |
|------------|----|-----|----|-----|-----|-----|-----|-----|-----|
| SMMPA05334 | 45 | 22  | 26 | 47  | 51  | 55  | 40  | 52  | 57  |
| SMMPA05335 | 12 | 19  | 12 | 18  | 24  | 20  | 14  | 22  | 15  |
| SMMPA05336 | 16 | 16  | 24 | 27  | 29  | 30  | 25  | 41  | 40  |
| SMMPA05337 | 19 | 23  | 19 | 123 | 102 | 90  | 76  | 76  | 70  |
| SMMPA05338 | 26 | 20  | 23 | 216 | 204 | 135 | 113 | 118 | 126 |
| SMMPA05339 | 19 | 17  | 24 | 71  | 60  | 50  | 59  | 59  | 45  |
| SMMPA05340 | 22 | 22  | 28 | 68  | 78  | 52  | 50  | 47  | 56  |
| SMMPA05341 | 23 | 23  | 14 | 29  | 37  | 36  | 24  | 22  | 21  |
| SMMPA05342 | 11 | 11  | 9  | 12  | 16  | 9   | 15  | 22  | 18  |
| SMMPA05343 | 8  | 18  | 16 | 21  | 23  | 29  | 21  | 16  | 21  |
| SMMPA05344 | 17 | 11  | 14 | 24  | 10  | 15  | 12  | 16  | 20  |
| SMMPA05345 | 34 | 43  | 29 | 31  | 48  | 38  | 44  | 62  | 52  |
| SMMPA05346 | 15 | 18  | 8  | 23  | 17  | 19  | 23  | 24  | 25  |
| SMMPA05347 | 27 | 27  | 20 | 44  | 42  | 46  | 29  | 37  | 37  |
| SMMPA05348 | 27 | 16  | 18 | 58  | 60  | 46  | 19  | 49  | 50  |
| SMMPA05349 | 20 | 22  | 18 | 38  | 33  | 23  | 28  | 31  | 37  |
| SMMPA05350 | 17 | 19  | 22 | 60  | 52  | 45  | 27  | 29  | 33  |
| SMMPA05351 | 15 | 23  | 27 | 48  | 41  | 38  | 29  | 31  | 35  |
| SMMPA05352 | 15 | 11  | 24 | 45  | 37  | 26  | 20  | 21  | 39  |
| SMMPA05353 | 3  | 8   | 7  | 18  | 22  | 17  | 3   | 13  | 12  |
| SMMPA05354 | 14 | 14  | 22 | 44  | 34  | 25  | 22  | 27  | 30  |
| SMMPA05355 | 12 | 18  | 19 | 13  | 16  | 10  | 30  | 25  | 20  |
| SMMPA05356 | 21 | 18  | 22 | 24  | 25  | 25  | 29  | 39  | 33  |
| SMMPA05357 | 27 | 26  | 16 | 28  | 31  | 25  | 30  | 31  | 35  |
| SMMPA05358 | 10 | 10  | 7  | 18  | 20  | 18  | 17  | 30  | 12  |
| SMMPA05359 | 23 | 25  | 19 | 29  | 23  | 27  | 27  | 51  | 48  |
| SMMPA05360 | 11 | 12  | 9  | 32  | 24  | 20  | 26  | 29  | 34  |
| SMMPA05361 | 17 | 21  | 23 | 30  | 29  | 17  | 36  | 47  | 48  |
| SMMPA05362 | 15 | 11  | 23 | 28  | 29  | 29  | 25  | 43  | 27  |
| SMMPA05363 | 17 | 5   | 10 | 21  | 18  | 17  | 19  | 31  | 31  |
| SMMPA05364 | 99 | 112 | 77 | 57  | 47  | 67  | 59  | 81  | 81  |
| SMMPA05365 | 33 | 21  | 20 | 37  | 38  | 30  | 20  | 30  | 36  |
| SMMPA05366 | 24 | 26  | 10 | 21  | 33  | 28  | 15  | 15  | 24  |
| SMMPA05367 | 43 | 44  | 58 | 33  | 28  | 37  | 52  | 57  | 66  |
| SMMPA05368 | 32 | 47  | 30 | 46  | 33  | 34  | 41  | 53  | 50  |
| SMMPA05369 | 22 | 29  | 19 | 49  | 31  | 30  | 49  | 75  | 65  |
| SMMPA05370 | 19 | 16  | 23 | 31  | 30  | 26  | 34  | 34  | 33  |
| SMMPA05371 | 11 | 22  | 19 | 43  | 38  | 32  | 33  | 40  | 30  |
| SMMPA05372 | 34 | 25  | 26 | 58  | 51  | 38  | 23  | 32  | 32  |
| SMMPA05373 | 43 | 40  | 34 | 38  | 37  | 43  | 46  | 40  | 47  |
| SMMPA05374 | 17 | 22  | 32 | 28  | 27  | 32  | 24  | 36  | 40  |

|            |    |    |    |     |     |     |     |     |     |
|------------|----|----|----|-----|-----|-----|-----|-----|-----|
| SMMPA05375 | 28 | 19 | 22 | 34  | 22  | 27  | 24  | 31  | 39  |
| SMMPA05376 | 20 | 25 | 20 | 23  | 15  | 29  | 26  | 28  | 22  |
| SMMPA05377 | 80 | 91 | 84 | 70  | 51  | 77  | 75  | 89  | 99  |
| SMMPA05378 | 35 | 40 | 24 | 29  | 24  | 32  | 36  | 31  | 43  |
| SMMPA05379 | 38 | 48 | 37 | 40  | 28  | 28  | 24  | 49  | 37  |
| SMMPA05380 | 43 | 44 | 34 | 39  | 34  | 42  | 51  | 50  | 50  |
| SMMPA05381 | 21 | 18 | 14 | 19  | 14  | 27  | 24  | 34  | 34  |
| SMMPA05382 | 19 | 17 | 22 | 33  | 20  | 22  | 29  | 34  | 23  |
| SMMPA05383 | 46 | 41 | 36 | 87  | 88  | 81  | 56  | 97  | 97  |
| SMMPA05384 | 32 | 25 | 29 | 29  | 31  | 36  | 49  | 50  | 46  |
| SMMPA05385 | 25 | 25 | 20 | 22  | 25  | 23  | 43  | 46  | 40  |
| SMMPA05386 | 32 | 32 | 24 | 266 | 221 | 182 | 151 | 176 | 176 |
| SMMPA05387 | 27 | 27 | 19 | 19  | 30  | 28  | 33  | 30  | 39  |
| SMMPA05388 | 16 | 13 | 12 | 24  | 22  | 17  | 15  | 29  | 27  |
| SMMPA05389 | 18 | 21 | 21 | 51  | 48  | 47  | 32  | 38  | 30  |
| SMMPA05390 | 18 | 12 | 13 | 85  | 76  | 60  | 40  | 53  | 51  |
| SMMPA05391 | 15 | 21 | 18 | 55  | 36  | 45  | 27  | 36  | 33  |
| SMMPA05392 | 22 | 26 | 22 | 81  | 87  | 72  | 45  | 63  | 70  |
| SMMPA05393 | 17 | 15 | 16 | 23  | 31  | 18  | 22  | 26  | 28  |
| SMMPA05394 | 35 | 15 | 22 | 65  | 69  | 53  | 47  | 39  | 40  |
| SMMPA05395 | 17 | 26 | 16 | 24  | 28  | 26  | 18  | 32  | 25  |
| SMMPA05396 | 26 | 15 | 16 | 45  | 36  | 28  | 25  | 25  | 32  |
| SMMPA05397 | 23 | 18 | 22 | 35  | 29  | 40  | 23  | 27  | 23  |
| SMMPA05398 | 18 | 32 | 18 | 15  | 21  | 25  | 25  | 18  | 19  |
| SMMPA05399 | 10 | 13 | 6  | 27  | 21  | 26  | 20  | 23  | 18  |
| SMMPA05400 | 37 | 38 | 45 | 50  | 54  | 32  | 33  | 47  | 53  |
| SMMPA05401 | 13 | 14 | 12 | 33  | 28  | 25  | 21  | 21  | 28  |
| SMMPA05402 | 18 | 16 | 18 | 62  | 42  | 40  | 39  | 45  | 57  |
| SMMPA05403 | 8  | 13 | 5  | 10  | 12  | 7   | 9   | 12  | 15  |
| SMMPA05404 | 10 | 13 | 15 | 21  | 21  | 16  | 16  | 23  | 30  |
| SMMPA05405 | 23 | 29 | 17 | 32  | 32  | 19  | 22  | 26  | 28  |
| SMMPA05406 | 10 | 18 | 22 | 31  | 35  | 34  | 25  | 25  | 25  |
| SMMPA05407 | 22 | 24 | 24 | 41  | 29  | 37  | 35  | 30  | 39  |
| SMMPA05408 | 60 | 52 | 38 | 34  | 30  | 32  | 43  | 55  | 48  |
| SMMPA05409 | 22 | 28 | 19 | 10  | 12  | 10  | 25  | 14  | 16  |
| SMMPA05410 | 33 | 32 | 23 | 80  | 63  | 58  | 35  | 74  | 58  |
| SMMPA05411 | 16 | 23 | 17 | 116 | 109 | 82  | 65  | 88  | 88  |
| SMMPA05412 | 15 | 17 | 17 | 87  | 66  | 47  | 46  | 49  | 48  |
| SMMPA05413 | 20 | 17 | 19 | 40  | 28  | 34  | 25  | 44  | 44  |
| SMMPA05414 | 17 | 15 | 20 | 24  | 31  | 30  | 16  | 32  | 26  |
| SMMPA05415 | 1  | 1  | 0  | 3   | 5   | 2   | 3   | 5   | 2   |

|            |    |    |    |     |     |     |     |     |     |
|------------|----|----|----|-----|-----|-----|-----|-----|-----|
| SMMPA05416 | 16 | 18 | 16 | 17  | 27  | 19  | 18  | 28  | 21  |
| SMMPA05417 | 9  | 17 | 19 | 38  | 32  | 36  | 25  | 38  | 33  |
| SMMPA05418 | 97 | 85 | 83 | 56  | 63  | 54  | 108 | 133 | 148 |
| SMMPA05419 | 10 | 7  | 8  | 27  | 15  | 17  | 23  | 28  | 17  |
| SMMPA05420 | 3  | 2  | 5  | 3   | 6   | 6   | 3   | 6   | 4   |
| SMMPA05421 | 10 | 10 | 12 | 35  | 31  | 33  | 20  | 25  | 21  |
| SMMPA05422 | 14 | 12 | 24 | 31  | 28  | 25  | 29  | 42  | 30  |
| SMMPA05423 | 23 | 31 | 26 | 40  | 48  | 45  | 34  | 61  | 62  |
| SMMPA05424 | 20 | 24 | 24 | 53  | 41  | 44  | 33  | 41  | 34  |
| SMMPA05425 | 23 | 31 | 22 | 55  | 52  | 39  | 52  | 67  | 72  |
| SMMPA05426 | 33 | 24 | 20 | 71  | 66  | 47  | 59  | 96  | 64  |
| SMMPA05427 | 29 | 31 | 25 | 44  | 38  | 46  | 27  | 37  | 45  |
| SMMPA05428 | 45 | 44 | 47 | 26  | 15  | 33  | 31  | 44  | 46  |
| SMMPA05429 | 30 | 26 | 26 | 33  | 27  | 29  | 29  | 32  | 46  |
| SMMPA05430 | 22 | 20 | 25 | 11  | 16  | 16  | 29  | 35  | 23  |
| SMMPA05431 | 17 | 22 | 19 | 37  | 39  | 26  | 25  | 27  | 35  |
| SMMPA05432 | 8  | 16 | 21 | 22  | 31  | 24  | 17  | 19  | 24  |
| SMMPA05433 | 28 | 44 | 34 | 47  | 43  | 33  | 28  | 50  | 41  |
| SMMPA05434 | 13 | 13 | 9  | 19  | 15  | 14  | 17  | 17  | 21  |
| SMMPA05435 | 28 | 13 | 12 | 35  | 36  | 23  | 22  | 18  | 16  |
| SMMPA05436 | 16 | 22 | 15 | 41  | 50  | 25  | 27  | 34  | 44  |
| SMMPA05437 | 23 | 31 | 24 | 196 | 191 | 151 | 106 | 122 | 122 |
| SMMPA05438 | 30 | 39 | 40 | 94  | 111 | 90  | 58  | 73  | 63  |
| SMMPA05439 | 8  | 4  | 2  | 33  | 18  | 20  | 14  | 19  | 14  |
| SMMPA05440 | 23 | 32 | 17 | 59  | 39  | 31  | 33  | 49  | 41  |
| SMMPA05441 | 37 | 32 | 40 | 122 | 108 | 79  | 63  | 85  | 74  |
| SMMPA05442 | 23 | 14 | 15 | 37  | 32  | 32  | 14  | 22  | 33  |
| SMMPA05443 | 14 | 12 | 12 | 23  | 13  | 17  | 22  | 24  | 19  |
| SMMPA05444 | 20 | 23 | 13 | 25  | 19  | 16  | 23  | 23  | 16  |
| SMMPA05445 | 27 | 19 | 16 | 33  | 25  | 31  | 26  | 34  | 19  |
| SMMPA05446 | 37 | 42 | 31 | 50  | 43  | 30  | 54  | 47  | 47  |
| SMMPA05447 | 26 | 25 | 28 | 333 | 281 | 212 | 165 | 241 | 197 |
| SMMPA05448 | 12 | 7  | 9  | 22  | 30  | 18  | 28  | 30  | 27  |
| SMMPA05449 | 20 | 10 | 11 | 116 | 94  | 66  | 50  | 77  | 73  |
| SMMPA05450 | 18 | 18 | 15 | 22  | 36  | 21  | 38  | 39  | 32  |
| SMMPA05451 | 19 | 21 | 17 | 14  | 19  | 17  | 25  | 42  | 36  |
| SMMPA05452 | 8  | 6  | 7  | 4   | 8   | 9   | 6   | 9   | 12  |
| SMMPA05453 | 19 | 18 | 25 | 105 | 78  | 79  | 48  | 67  | 53  |
| SMMPA05454 | 14 | 17 | 15 | 41  | 40  | 32  | 23  | 31  | 28  |
| SMMPA05455 | 16 | 31 | 23 | 38  | 33  | 45  | 25  | 32  | 43  |
| SMMPA05456 | 9  | 8  | 5  | 28  | 23  | 18  | 16  | 16  | 21  |

|            |     |     |    |     |     |     |     |     |     |
|------------|-----|-----|----|-----|-----|-----|-----|-----|-----|
| SMMPA05457 | 8   | 12  | 16 | 61  | 46  | 37  | 41  | 30  | 35  |
| SMMPA05458 | 6   | 4   | 4  | 3   | 8   | 5   | 5   | 11  | 8   |
| SMMPA05459 | 4   | 2   | 2  | 10  | 6   | 10  | 8   | 10  | 7   |
| SMMPA05460 | 2   | 3   | 6  | 10  | 11  | 6   | 9   | 6   | 9   |
| SMMPA05461 | 0   | 0   | 0  | 2   | 0   | 0   | 0   | 0   | 0   |
| SMMPA05462 | 10  | 8   | 7  | 12  | 13  | 11  | 16  | 12  | 9   |
| SMMPA05463 | 26  | 38  | 29 | 62  | 56  | 56  | 69  | 92  | 99  |
| SMMPA05464 | 26  | 34  | 13 | 217 | 198 | 151 | 101 | 128 | 104 |
| SMMPA05465 | 46  | 44  | 39 | 126 | 100 | 85  | 48  | 58  | 63  |
| SMMPA05466 | 26  | 26  | 17 | 31  | 26  | 24  | 29  | 38  | 30  |
| SMMPA05467 | 24  | 34  | 22 | 122 | 133 | 99  | 76  | 95  | 73  |
| SMMPA05468 | 55  | 59  | 60 | 124 | 113 | 99  | 101 | 116 | 100 |
| SMMPA05469 | 31  | 34  | 27 | 966 | 839 | 783 | 462 | 700 | 590 |
| SMMPA05470 | 71  | 57  | 50 | 128 | 98  | 100 | 85  | 112 | 102 |
| SMMPA05471 | 16  | 26  | 33 | 71  | 75  | 52  | 41  | 40  | 44  |
| SMMPA05472 | 13  | 18  | 14 | 55  | 35  | 32  | 21  | 30  | 26  |
| SMMPA05473 | 16  | 29  | 28 | 228 | 206 | 174 | 96  | 165 | 113 |
| SMMPA05474 | 22  | 31  | 25 | 667 | 654 | 564 | 364 | 510 | 464 |
| SMMPA05475 | 9   | 11  | 6  | 12  | 12  | 18  | 4   | 11  | 12  |
| SMMPA05476 | 49  | 63  | 45 | 42  | 42  | 45  | 30  | 49  | 35  |
| SMMPA05477 | 18  | 14  | 26 | 29  | 24  | 22  | 25  | 31  | 24  |
| SMMPA05478 | 19  | 17  | 19 | 20  | 14  | 16  | 10  | 16  | 12  |
| SMMPA05479 | 19  | 25  | 13 | 60  | 51  | 42  | 27  | 39  | 40  |
| SMMPA05480 | 19  | 21  | 13 | 30  | 33  | 35  | 23  | 26  | 31  |
| SMMPA05481 | 20  | 30  | 16 | 58  | 43  | 51  | 39  | 54  | 50  |
| SMMPA05482 | 40  | 30  | 25 | 123 | 99  | 86  | 66  | 73  | 96  |
| SMMPA05483 | 19  | 21  | 15 | 28  | 32  | 33  | 24  | 39  | 49  |
| SMMPA05484 | 11  | 16  | 23 | 21  | 28  | 20  | 22  | 24  | 26  |
| SMMPA05485 | 16  | 16  | 18 | 49  | 68  | 45  | 31  | 39  | 42  |
| SMMPA05486 | 34  | 47  | 37 | 38  | 30  | 38  | 51  | 60  | 65  |
| SMMPA05487 | 39  | 41  | 42 | 35  | 27  | 24  | 38  | 49  | 50  |
| SMMPA05488 | 29  | 24  | 21 | 15  | 20  | 25  | 24  | 43  | 36  |
| SMMPA05489 | 36  | 51  | 40 | 49  | 51  | 39  | 60  | 76  | 82  |
| SMMPA05490 | 125 | 108 | 96 | 100 | 85  | 101 | 86  | 125 | 111 |
| SMMPA05491 | 77  | 76  | 50 | 68  | 76  | 50  | 84  | 92  | 121 |
| SMMPA05492 | 69  | 78  | 59 | 88  | 86  | 79  | 95  | 137 | 126 |
| SMMPA05493 | 66  | 52  | 45 | 54  | 28  | 48  | 65  | 75  | 74  |
| SMMPA05494 | 73  | 78  | 63 | 296 | 275 | 232 | 141 | 172 | 183 |
| SMMPA05495 | 60  | 75  | 60 | 59  | 47  | 50  | 78  | 89  | 108 |
| SMMPA05496 | 14  | 9   | 17 | 18  | 18  | 9   | 23  | 23  | 21  |
| SMMPA05497 | 4   | 3   | 7  | 1   | 6   | 1   | 3   | 7   | 6   |

|            |    |    |    |     |     |     |     |     |     |
|------------|----|----|----|-----|-----|-----|-----|-----|-----|
| SMMPA05498 | 4  | 9  | 3  | 5   | 1   | 3   | 7   | 11  | 4   |
| SMMPA05499 | 15 | 18 | 21 | 33  | 27  | 14  | 30  | 29  | 33  |
| SMMPA05500 | 19 | 28 | 24 | 61  | 43  | 53  | 33  | 51  | 34  |
| SMMPA05501 | 19 | 15 | 19 | 35  | 34  | 28  | 25  | 41  | 37  |
| SMMPA05502 | 29 | 28 | 18 | 64  | 60  | 58  | 41  | 69  | 68  |
| SMMPA05503 | 21 | 19 | 28 | 115 | 75  | 94  | 43  | 59  | 62  |
| SMMPA05504 | 20 | 28 | 26 | 71  | 73  | 57  | 40  | 43  | 45  |
| SMMPA05505 | 15 | 28 | 13 | 137 | 116 | 105 | 62  | 82  | 64  |
| SMMPA05506 | 21 | 30 | 22 | 66  | 58  | 62  | 63  | 54  | 62  |
| SMMPA05507 | 26 | 33 | 29 | 132 | 117 | 84  | 32  | 61  | 54  |
| SMMPA05508 | 15 | 14 | 11 | 19  | 18  | 12  | 21  | 24  | 33  |
| SMMPA05509 | 24 | 20 | 23 | 26  | 22  | 23  | 24  | 39  | 32  |
| SMMPA05510 | 26 | 22 | 25 | 47  | 38  | 46  | 26  | 35  | 28  |
| SMMPA05511 | 34 | 39 | 21 | 26  | 34  | 25  | 21  | 25  | 25  |
| SMMPA05512 | 18 | 29 | 15 | 29  | 35  | 25  | 25  | 22  | 25  |
| SMMPA05513 | 32 | 30 | 19 | 38  | 35  | 29  | 19  | 38  | 30  |
| SMMPA05514 | 30 | 34 | 19 | 49  | 63  | 47  | 48  | 53  | 51  |
| SMMPA05515 | 23 | 35 | 20 | 53  | 48  | 37  | 33  | 38  | 37  |
| SMMPA05516 | 16 | 22 | 23 | 31  | 26  | 32  | 31  | 26  | 31  |
| SMMPA05517 | 12 | 19 | 11 | 13  | 20  | 22  | 15  | 20  | 13  |
| SMMPA05518 | 15 | 22 | 16 | 32  | 37  | 24  | 29  | 37  | 35  |
| SMMPA05519 | 20 | 15 | 12 | 38  | 46  | 25  | 27  | 35  | 26  |
| SMMPA05520 | 16 | 21 | 12 | 13  | 21  | 18  | 18  | 28  | 31  |
| SMMPA05521 | 21 | 15 | 12 | 218 | 203 | 169 | 74  | 94  | 93  |
| SMMPA05522 | 5  | 18 | 19 | 14  | 14  | 17  | 9   | 18  | 13  |
| SMMPA05523 | 21 | 18 | 19 | 21  | 27  | 23  | 18  | 23  | 27  |
| SMMPA05524 | 24 | 15 | 21 | 13  | 17  | 28  | 25  | 17  | 28  |
| SMMPA05525 | 28 | 23 | 29 | 36  | 35  | 36  | 15  | 33  | 24  |
| SMMPA05526 | 10 | 11 | 14 | 14  | 24  | 25  | 19  | 26  | 27  |
| SMMPA05527 | 42 | 53 | 33 | 191 | 188 | 144 | 134 | 176 | 145 |
| SMMPA05528 | 31 | 37 | 41 | 83  | 81  | 64  | 49  | 79  | 71  |
| SMMPA05529 | 84 | 99 | 97 | 60  | 65  | 75  | 66  | 84  | 107 |
| SMMPA05530 | 17 | 20 | 8  | 14  | 10  | 15  | 14  | 13  | 20  |
| SMMPA05531 | 26 | 38 | 37 | 128 | 128 | 110 | 70  | 113 | 108 |
| SMMPA05532 | 37 | 24 | 36 | 65  | 53  | 48  | 55  | 71  | 58  |
| SMMPA05533 | 32 | 15 | 30 | 23  | 21  | 22  | 23  | 53  | 23  |
| SMMPA05534 | 20 | 16 | 7  | 28  | 29  | 35  | 27  | 29  | 30  |
| SMMPA05535 | 10 | 12 | 9  | 16  | 14  | 22  | 12  | 6   | 18  |
| SMMPA05536 | 31 | 31 | 18 | 265 | 254 | 186 | 110 | 126 | 152 |
| SMMPA05537 | 40 | 43 | 39 | 225 | 198 | 156 | 80  | 84  | 96  |
| SMMPA05538 | 13 | 22 | 25 | 43  | 41  | 30  | 28  | 28  | 29  |



|            |     |     |    |     |     |     |    |     |     |
|------------|-----|-----|----|-----|-----|-----|----|-----|-----|
| SMMPA05539 | 23  | 22  | 26 | 89  | 64  | 48  | 44 | 48  | 40  |
| SMMPA05540 | 15  | 20  | 17 | 17  | 20  | 14  | 18 | 23  | 34  |
| SMMPA05541 | 34  | 23  | 36 | 73  | 64  | 68  | 41 | 56  | 56  |
| SMMPA05542 | 18  | 21  | 25 | 66  | 64  | 54  | 55 | 49  | 37  |
| SMMPA05543 | 16  | 29  | 23 | 116 | 94  | 81  | 69 | 81  | 76  |
| SMMPA05544 | 21  | 13  | 14 | 31  | 34  | 24  | 25 | 39  | 31  |
| SMMPA05545 | 29  | 32  | 13 | 140 | 134 | 109 | 81 | 109 | 101 |
| SMMPA05546 | 27  | 17  | 16 | 32  | 30  | 27  | 26 | 40  | 35  |
| SMMPA05547 | 19  | 20  | 8  | 29  | 31  | 30  | 23 | 24  | 21  |
| SMMPA05548 | 31  | 29  | 24 | 37  | 30  | 38  | 44 | 54  | 59  |
| SMMPA05549 | 26  | 30  | 22 | 42  | 27  | 28  | 38 | 49  | 54  |
| SMMPA05550 | 21  | 20  | 21 | 32  | 19  | 25  | 21 | 39  | 36  |
| SMMPA05551 | 23  | 25  | 23 | 47  | 45  | 40  | 30 | 42  | 50  |
| SMMPA05552 | 15  | 10  | 13 | 19  | 16  | 17  | 13 | 19  | 17  |
| SMMPA05553 | 28  | 23  | 26 | 43  | 34  | 35  | 46 | 57  | 51  |
| SMMPA05554 | 13  | 17  | 15 | 38  | 23  | 28  | 22 | 35  | 27  |
| SMMPA05555 | 18  | 26  | 21 | 56  | 32  | 38  | 36 | 41  | 32  |
| SMMPA05556 | 14  | 15  | 12 | 55  | 33  | 40  | 31 | 24  | 36  |
| SMMPA05557 | 3   | 13  | 7  | 33  | 27  | 24  | 25 | 32  | 36  |
| SMMPA05558 | 13  | 18  | 6  | 35  | 29  | 32  | 38 | 51  | 44  |
| SMMPA05559 | 22  | 20  | 13 | 42  | 30  | 26  | 27 | 36  | 37  |
| SMMPA05560 | 11  | 12  | 15 | 28  | 21  | 11  | 13 | 21  | 13  |
| SMMPA05561 | 12  | 24  | 22 | 69  | 70  | 42  | 32 | 66  | 59  |
| SMMPA05562 | 8   | 11  | 12 | 29  | 40  | 42  | 33 | 36  | 45  |
| SMMPA05563 | 25  | 24  | 22 | 30  | 21  | 23  | 31 | 29  | 25  |
| SMMPA05564 | 19  | 27  | 27 | 48  | 69  | 52  | 27 | 47  | 43  |
| SMMPA05565 | 23  | 33  | 25 | 69  | 62  | 63  | 49 | 44  | 63  |
| SMMPA05566 | 19  | 21  | 17 | 44  | 34  | 36  | 25 | 32  | 33  |
| SMMPA05567 | 22  | 13  | 14 | 23  | 18  | 17  | 13 | 20  | 18  |
| SMMPA05568 | 31  | 27  | 27 | 34  | 27  | 33  | 37 | 42  | 34  |
| SMMPA05569 | 24  | 24  | 20 | 27  | 37  | 38  | 22 | 37  | 42  |
| SMMPA05570 | 18  | 15  | 22 | 45  | 36  | 22  | 33 | 33  | 35  |
| SMMPA05571 | 111 | 112 | 74 | 100 | 71  | 85  | 77 | 83  | 96  |
| SMMPA05572 | 13  | 14  | 17 | 36  | 26  | 37  | 31 | 35  | 27  |
| SMMPA05573 | 9   | 14  | 15 | 57  | 42  | 36  | 26 | 36  | 33  |
| SMMPA05574 | 20  | 23  | 12 | 121 | 111 | 96  | 52 | 72  | 65  |
| SMMPA05575 | 6   | 8   | 8  | 14  | 16  | 9   | 14 | 16  | 11  |
| SMMPA05576 | 36  | 38  | 28 | 34  | 33  | 25  | 23 | 33  | 35  |
| SMMPA05577 | 24  | 16  | 15 | 88  | 84  | 50  | 30 | 55  | 50  |
| SMMPA05578 | 16  | 7   | 10 | 63  | 38  | 31  | 20 | 27  | 23  |
| SMMPA05579 | 10  | 11  | 14 | 17  | 18  | 12  | 12 | 22  | 16  |

|            |     |    |    |     |     |     |     |     |     |
|------------|-----|----|----|-----|-----|-----|-----|-----|-----|
| SMMPA05580 | 11  | 17 | 15 | 51  | 45  | 40  | 34  | 29  | 33  |
| SMMPA05581 | 10  | 13 | 12 | 22  | 18  | 19  | 25  | 31  | 27  |
| SMMPA05582 | 8   | 13 | 5  | 11  | 12  | 19  | 10  | 15  | 15  |
| SMMPA05583 | 8   | 8  | 13 | 19  | 20  | 15  | 15  | 16  | 12  |
| SMMPA05584 | 13  | 21 | 29 | 94  | 91  | 70  | 66  | 71  | 93  |
| SMMPA05585 | 17  | 14 | 10 | 35  | 38  | 29  | 15  | 29  | 21  |
| SMMPA05586 | 28  | 26 | 17 | 46  | 38  | 36  | 33  | 37  | 37  |
| SMMPA05587 | 21  | 34 | 20 | 84  | 70  | 57  | 45  | 70  | 54  |
| SMMPA05588 | 34  | 25 | 20 | 63  | 45  | 38  | 44  | 59  | 64  |
| SMMPA05589 | 15  | 14 | 12 | 37  | 43  | 32  | 13  | 31  | 26  |
| SMMPA05590 | 17  | 22 | 15 | 54  | 55  | 43  | 38  | 57  | 51  |
| SMMPA05591 | 20  | 19 | 28 | 18  | 21  | 18  | 18  | 23  | 33  |
| SMMPA05592 | 46  | 30 | 52 | 32  | 35  | 31  | 34  | 25  | 48  |
| SMMPA05593 | 24  | 28 | 22 | 57  | 49  | 51  | 38  | 51  | 42  |
| SMMPA05594 | 29  | 31 | 28 | 43  | 41  | 29  | 40  | 40  | 51  |
| SMMPA05595 | 26  | 27 | 25 | 64  | 76  | 47  | 29  | 52  | 65  |
| SMMPA05596 | 34  | 33 | 16 | 75  | 45  | 36  | 38  | 79  | 40  |
| SMMPA05597 | 28  | 24 | 23 | 97  | 70  | 63  | 53  | 71  | 60  |
| SMMPA05598 | 41  | 33 | 24 | 22  | 36  | 25  | 18  | 20  | 35  |
| SMMPA05599 | 16  | 14 | 17 | 22  | 15  | 15  | 18  | 19  | 27  |
| SMMPA05600 | 11  | 16 | 11 | 17  | 23  | 20  | 15  | 25  | 16  |
| SMMPA05601 | 32  | 35 | 31 | 33  | 31  | 35  | 23  | 38  | 36  |
| SMMPA05602 | 125 | 97 | 81 | 63  | 75  | 71  | 51  | 67  | 56  |
| SMMPA05603 | 27  | 48 | 34 | 40  | 44  | 31  | 35  | 41  | 40  |
| SMMPA05604 | 29  | 20 | 24 | 26  | 39  | 21  | 13  | 28  | 16  |
| SMMPA05605 | 24  | 28 | 22 | 40  | 37  | 30  | 32  | 42  | 29  |
| SMMPA05606 | 11  | 21 | 15 | 23  | 31  | 24  | 19  | 30  | 35  |
| SMMPA05607 | 28  | 36 | 22 | 50  | 41  | 36  | 42  | 43  | 52  |
| SMMPA05608 | 8   | 20 | 7  | 6   | 13  | 13  | 5   | 21  | 13  |
| SMMPA05609 | 14  | 15 | 16 | 20  | 12  | 18  | 10  | 17  | 21  |
| SMMPA05610 | 22  | 19 | 21 | 26  | 28  | 17  | 16  | 29  | 25  |
| SMMPA05611 | 19  | 15 | 13 | 33  | 28  | 28  | 31  | 38  | 32  |
| SMMPA05612 | 23  | 28 | 25 | 62  | 37  | 30  | 36  | 53  | 40  |
| SMMPA05613 | 14  | 26 | 19 | 14  | 17  | 16  | 12  | 23  | 23  |
| SMMPA05614 | 20  | 19 | 21 | 25  | 26  | 36  | 23  | 20  | 34  |
| SMMPA05615 | 61  | 70 | 46 | 58  | 45  | 39  | 25  | 39  | 43  |
| SMMPA05616 | 24  | 17 | 22 | 26  | 19  | 15  | 21  | 28  | 28  |
| SMMPA05617 | 39  | 32 | 25 | 62  | 43  | 46  | 49  | 42  | 55  |
| SMMPA05618 | 5   | 3  | 6  | 5   | 3   | 3   | 3   | 8   | 9   |
| SMMPA05619 | 17  | 13 | 23 | 16  | 10  | 15  | 9   | 23  | 20  |
| SMMPA05620 | 21  | 32 | 17 | 791 | 777 | 688 | 384 | 519 | 503 |

|            |    |    |    |     |     |     |     |     |     |
|------------|----|----|----|-----|-----|-----|-----|-----|-----|
| SMMPA05621 | 12 | 14 | 9  | 370 | 355 | 297 | 160 | 188 | 199 |
| SMMPA05622 | 25 | 29 | 22 | 631 | 646 | 532 | 276 | 370 | 329 |
| SMMPA05623 | 19 | 12 | 17 | 152 | 176 | 118 | 66  | 89  | 91  |
| SMMPA05624 | 29 | 22 | 23 | 374 | 342 | 295 | 103 | 124 | 101 |
| SMMPA05625 | 3  | 6  | 6  | 11  | 6   | 19  | 9   | 14  | 9   |
| SMMPA05626 | 18 | 23 | 17 | 36  | 42  | 20  | 31  | 33  | 39  |
| SMMPA05627 | 46 | 29 | 33 | 34  | 21  | 32  | 37  | 40  | 43  |
| SMMPA05628 | 26 | 35 | 28 | 32  | 40  | 29  | 27  | 42  | 34  |
| SMMPA05629 | 54 | 44 | 43 | 44  | 40  | 38  | 27  | 53  | 40  |
| SMMPA05630 | 13 | 10 | 15 | 29  | 43  | 23  | 20  | 31  | 30  |
| SMMPA05631 | 6  | 9  | 10 | 14  | 19  | 10  | 15  | 10  | 18  |
| SMMPA05632 | 9  | 5  | 8  | 12  | 10  | 12  | 13  | 7   | 13  |
| SMMPA05633 | 18 | 21 | 12 | 38  | 31  | 29  | 23  | 33  | 32  |
| SMMPA05634 | 18 | 13 | 15 | 20  | 19  | 18  | 32  | 38  | 33  |
| SMMPA05635 | 13 | 9  | 3  | 84  | 77  | 70  | 29  | 51  | 41  |
| SMMPA05636 | 4  | 5  | 4  | 24  | 20  | 33  | 6   | 6   | 14  |
| SMMPA05637 | 14 | 24 | 13 | 202 | 215 | 185 | 61  | 73  | 51  |
| SMMPA05638 | 37 | 27 | 22 | 223 | 187 | 152 | 93  | 100 | 102 |
| SMMPA05639 | 18 | 10 | 11 | 14  | 24  | 15  | 18  | 29  | 26  |
| SMMPA05640 | 23 | 33 | 18 | 35  | 24  | 22  | 22  | 39  | 35  |
| SMMPA05641 | 30 | 19 | 15 | 34  | 24  | 28  | 26  | 34  | 33  |
| SMMPA05642 | 25 | 39 | 18 | 100 | 95  | 76  | 51  | 54  | 77  |
| SMMPA05643 | 21 | 21 | 23 | 26  | 31  | 28  | 21  | 33  | 25  |
| SMMPA05644 | 16 | 19 | 15 | 17  | 13  | 11  | 15  | 16  | 18  |
| SMMPA05645 | 4  | 4  | 5  | 2   | 6   | 1   | 5   | 4   | 4   |
| SMMPA05646 | 5  | 3  | 7  | 4   | 4   | 3   | 7   | 6   | 12  |
| SMMPA05647 | 13 | 26 | 18 | 174 | 156 | 126 | 70  | 105 | 69  |
| SMMPA05648 | 37 | 36 | 45 | 41  | 58  | 36  | 47  | 54  | 65  |
| SMMPA05649 | 20 | 20 | 17 | 33  | 31  | 30  | 26  | 40  | 32  |
| SMMPA05650 | 36 | 34 | 22 | 90  | 88  | 69  | 113 | 139 | 149 |
| SMMPA05651 | 31 | 41 | 38 | 73  | 74  | 60  | 52  | 77  | 85  |
| SMMPA05652 | 38 | 49 | 31 | 60  | 66  | 57  | 50  | 80  | 74  |
| SMMPA05653 | 40 | 43 | 42 | 219 | 175 | 132 | 91  | 121 | 122 |
| SMMPA05654 | 45 | 52 | 40 | 72  | 69  | 54  | 62  | 72  | 73  |
| SMMPA05655 | 24 | 22 | 19 | 53  | 29  | 23  | 24  | 18  | 27  |
| SMMPA05656 | 27 | 34 | 26 | 68  | 47  | 42  | 36  | 50  | 38  |
| SMMPA05657 | 44 | 39 | 33 | 92  | 55  | 64  | 40  | 50  | 52  |
| SMMPA05658 | 27 | 30 | 30 | 50  | 36  | 42  | 42  | 57  | 47  |
| SMMPA05659 | 4  | 9  | 10 | 17  | 25  | 14  | 14  | 21  | 18  |
| SMMPA05660 | 34 | 38 | 24 | 27  | 29  | 21  | 23  | 38  | 41  |
| SMMPA05661 | 28 | 24 | 24 | 96  | 65  | 52  | 43  | 63  | 51  |

|            |    |    |    |     |     |     |     |     |     |
|------------|----|----|----|-----|-----|-----|-----|-----|-----|
| SMMPA05662 | 18 | 17 | 16 | 223 | 185 | 168 | 188 | 222 | 245 |
| SMMPA05663 | 22 | 28 | 15 | 281 | 236 | 175 | 114 | 141 | 138 |
| SMMPA05664 | 12 | 14 | 12 | 18  | 23  | 25  | 19  | 13  | 14  |
| SMMPA05665 | 16 | 9  | 14 | 325 | 314 | 259 | 83  | 93  | 93  |
| SMMPA05666 | 12 | 20 | 9  | 296 | 239 | 246 | 243 | 342 | 321 |
| SMMPA05667 | 16 | 13 | 12 | 89  | 80  | 63  | 69  | 107 | 106 |
| SMMPA05668 | 11 | 19 | 8  | 292 | 218 | 145 | 162 | 223 | 183 |
| SMMPA05669 | 14 | 19 | 14 | 163 | 148 | 100 | 142 | 176 | 145 |
| SMMPA05670 | 5  | 17 | 11 | 238 | 231 | 213 | 191 | 234 | 225 |
| SMMPA05671 | 24 | 12 | 19 | 197 | 226 | 144 | 197 | 251 | 217 |
| SMMPA05672 | 19 | 17 | 15 | 217 | 182 | 157 | 148 | 171 | 163 |
| SMMPA05673 | 14 | 26 | 20 | 179 | 182 | 134 | 142 | 222 | 156 |
| SMMPA05674 | 29 | 21 | 17 | 454 | 355 | 287 | 318 | 402 | 404 |
| SMMPA05675 | 20 | 18 | 16 | 23  | 14  | 17  | 13  | 21  | 24  |
| SMMPA05676 | 19 | 22 | 21 | 197 | 185 | 155 | 84  | 147 | 125 |
| SMMPA05677 | 18 | 28 | 18 | 70  | 66  | 50  | 35  | 49  | 57  |
| SMMPA05678 | 32 | 34 | 29 | 98  | 95  | 72  | 67  | 82  | 65  |
| SMMPA05679 | 7  | 7  | 10 | 20  | 11  | 12  | 8   | 20  | 19  |
| SMMPA05680 | 20 | 25 | 22 | 62  | 58  | 39  | 42  | 62  | 45  |
| SMMPA05681 | 10 | 10 | 9  | 11  | 19  | 12  | 12  | 14  | 17  |
| SMMPA05682 | 13 | 6  | 7  | 19  | 23  | 17  | 15  | 17  | 15  |
| SMMPA05683 | 16 | 19 | 10 | 18  | 11  | 17  | 20  | 23  | 22  |
| SMMPA05684 | 15 | 35 | 26 | 123 | 164 | 129 | 43  | 67  | 69  |
| SMMPA05685 | 22 | 14 | 19 | 136 | 124 | 100 | 54  | 83  | 64  |
| SMMPA05686 | 16 | 16 | 14 | 30  | 34  | 28  | 28  | 32  | 45  |
| SMMPA05687 | 23 | 19 | 20 | 56  | 46  | 39  | 30  | 50  | 33  |
| SMMPA05688 | 15 | 11 | 14 | 102 | 99  | 88  | 40  | 59  | 49  |
| SMMPA05689 | 39 | 41 | 35 | 141 | 133 | 109 | 53  | 76  | 50  |
| SMMPA05690 | 13 | 24 | 23 | 85  | 72  | 55  | 24  | 35  | 39  |
| SMMPA05691 | 38 | 35 | 29 | 178 | 167 | 122 | 97  | 122 | 102 |
| SMMPA05692 | 36 | 31 | 36 | 102 | 118 | 99  | 88  | 130 | 119 |
| SMMPA05693 | 45 | 45 | 46 | 206 | 169 | 140 | 113 | 143 | 130 |
| SMMPA05694 | 26 | 19 | 16 | 25  | 28  | 34  | 34  | 29  | 31  |
| SMMPA05695 | 26 | 19 | 20 | 35  | 24  | 32  | 35  | 39  | 34  |
| SMMPA05696 | 10 | 14 | 14 | 9   | 12  | 12  | 13  | 25  | 19  |
| SMMPA05697 | 20 | 12 | 16 | 25  | 28  | 24  | 21  | 26  | 24  |
| SMMPA05698 | 15 | 31 | 18 | 27  | 28  | 30  | 21  | 25  | 22  |
| SMMPA05699 | 21 | 24 | 13 | 42  | 26  | 31  | 33  | 29  | 24  |
| SMMPA05700 | 21 | 12 | 11 | 15  | 17  | 18  | 8   | 13  | 13  |
| SMMPA05701 | 17 | 26 | 19 | 31  | 18  | 14  | 21  | 29  | 24  |
| SMMPA05702 | 17 | 39 | 27 | 54  | 45  | 40  | 31  | 39  | 46  |

|            |    |    |    |     |     |     |     |     |     |
|------------|----|----|----|-----|-----|-----|-----|-----|-----|
| SMMPA05703 | 16 | 21 | 14 | 54  | 51  | 38  | 37  | 43  | 47  |
| SMMPA05704 | 21 | 27 | 28 | 90  | 62  | 61  | 65  | 76  | 76  |
| SMMPA05705 | 20 | 25 | 25 | 23  | 30  | 28  | 31  | 39  | 35  |
| SMMPA05706 | 15 | 29 | 13 | 18  | 36  | 23  | 18  | 30  | 26  |
| SMMPA05707 | 17 | 17 | 20 | 45  | 40  | 40  | 32  | 38  | 27  |
| SMMPA05708 | 17 | 25 | 21 | 45  | 36  | 30  | 43  | 59  | 51  |
| SMMPA05709 | 19 | 17 | 21 | 39  | 33  | 32  | 42  | 60  | 40  |
| SMMPA05710 | 15 | 12 | 12 | 39  | 44  | 28  | 22  | 29  | 34  |
| SMMPA05711 | 18 | 20 | 11 | 32  | 30  | 13  | 30  | 45  | 43  |
| SMMPA05712 | 41 | 28 | 34 | 68  | 73  | 59  | 73  | 81  | 85  |
| SMMPA05713 | 34 | 32 | 24 | 68  | 77  | 58  | 53  | 74  | 74  |
| SMMPA05714 | 20 | 19 | 17 | 24  | 18  | 32  | 26  | 31  | 20  |
| SMMPA05715 | 7  | 8  | 3  | 92  | 75  | 65  | 25  | 38  | 29  |
| SMMPA05716 | 20 | 21 | 15 | 180 | 181 | 127 | 78  | 87  | 65  |
| SMMPA05717 | 32 | 31 | 37 | 128 | 114 | 97  | 63  | 89  | 60  |
| SMMPA05718 | 20 | 13 | 16 | 254 | 244 | 196 | 111 | 141 | 114 |
| SMMPA05719 | 11 | 13 | 17 | 46  | 47  | 52  | 12  | 22  | 16  |
| SMMPA05720 | 44 | 35 | 46 | 185 | 173 | 130 | 104 | 122 | 114 |
| SMMPA05721 | 11 | 8  | 13 | 10  | 11  | 12  | 14  | 21  | 17  |
| SMMPA05722 | 22 | 25 | 26 | 29  | 26  | 21  | 43  | 50  | 59  |
| SMMPA05723 | 21 | 21 | 17 | 112 | 91  | 76  | 39  | 67  | 64  |
| SMMPA05724 | 28 | 25 | 13 | 29  | 22  | 26  | 16  | 40  | 34  |
| SMMPA05725 | 32 | 28 | 30 | 33  | 27  | 23  | 31  | 42  | 35  |
| SMMPA05726 | 18 | 25 | 33 | 48  | 52  | 30  | 44  | 71  | 63  |
| SMMPA05727 | 41 | 25 | 28 | 34  | 20  | 31  | 22  | 37  | 38  |
| SMMPA05728 | 8  | 15 | 11 | 14  | 16  | 10  | 16  | 16  | 18  |
| SMMPA05729 | 5  | 7  | 7  | 18  | 16  | 13  | 15  | 19  | 11  |
| SMMPA05730 | 13 | 25 | 27 | 155 | 177 | 140 | 83  | 110 | 95  |
| SMMPA05731 | 24 | 25 | 13 | 113 | 105 | 66  | 61  | 87  | 73  |
| SMMPA05732 | 18 | 24 | 11 | 62  | 58  | 44  | 47  | 58  | 51  |
| SMMPA05733 | 15 | 36 | 12 | 16  | 14  | 14  | 10  | 27  | 25  |
| SMMPA05734 | 26 | 49 | 25 | 127 | 103 | 83  | 41  | 68  | 81  |
| SMMPA05735 | 26 | 23 | 18 | 142 | 93  | 88  | 72  | 92  | 70  |
| SMMPA05736 | 35 | 17 | 22 | 41  | 57  | 46  | 41  | 67  | 67  |
| SMMPA05737 | 11 | 13 | 9  | 439 | 427 | 381 | 204 | 276 | 234 |
| SMMPA05738 | 16 | 16 | 12 | 100 | 106 | 68  | 44  | 64  | 77  |
| SMMPA05739 | 26 | 35 | 20 | 88  | 77  | 54  | 55  | 55  | 59  |
| SMMPA05740 | 40 | 24 | 37 | 128 | 122 | 86  | 66  | 56  | 73  |
| SMMPA05741 | 14 | 7  | 10 | 106 | 99  | 80  | 46  | 56  | 43  |
| SMMPA05742 | 7  | 9  | 3  | 23  | 22  | 19  | 20  | 18  | 13  |
| SMMPA05743 | 31 | 32 | 28 | 216 | 175 | 133 | 91  | 124 | 121 |

|            |    |    |    |     |     |     |     |     |     |
|------------|----|----|----|-----|-----|-----|-----|-----|-----|
| SMMPA05744 | 29 | 50 | 17 | 85  | 92  | 61  | 74  | 107 | 126 |
| SMMPA05745 | 17 | 27 | 19 | 56  | 69  | 56  | 42  | 62  | 61  |
| SMMPA05746 | 29 | 42 | 30 | 80  | 72  | 73  | 74  | 86  | 92  |
| SMMPA05747 | 11 | 8  | 4  | 20  | 24  | 13  | 20  | 29  | 31  |
| SMMPA05748 | 18 | 21 | 14 | 132 | 100 | 98  | 51  | 67  | 46  |
| SMMPA05749 | 18 | 19 | 16 | 111 | 108 | 91  | 65  | 70  | 67  |
| SMMPA05750 | 31 | 39 | 30 | 293 | 249 | 206 | 123 | 167 | 154 |
| SMMPA05751 | 20 | 21 | 21 | 133 | 121 | 103 | 63  | 86  | 59  |
| SMMPA05752 | 14 | 8  | 11 | 34  | 43  | 29  | 26  | 28  | 27  |
| SMMPA05753 | 27 | 43 | 38 | 424 | 346 | 270 | 177 | 224 | 225 |
| SMMPA05754 | 68 | 73 | 60 | 252 | 232 | 195 | 106 | 153 | 127 |
| SMMPA05755 | 20 | 20 | 28 | 76  | 56  | 55  | 29  | 44  | 37  |
| SMMPA05756 | 43 | 36 | 35 | 165 | 162 | 128 | 110 | 123 | 113 |
| SMMPA05757 | 12 | 18 | 9  | 33  | 31  | 20  | 18  | 28  | 20  |
| SMMPA05758 | 26 | 17 | 16 | 48  | 45  | 39  | 28  | 32  | 35  |
| SMMPA05759 | 39 | 22 | 26 | 43  | 39  | 38  | 38  | 52  | 41  |
| SMMPA05760 | 25 | 31 | 34 | 34  | 49  | 20  | 43  | 43  | 43  |
| SMMPA05761 | 48 | 28 | 32 | 46  | 42  | 55  | 45  | 70  | 75  |
| SMMPA05762 | 26 | 32 | 37 | 21  | 20  | 18  | 28  | 41  | 31  |
| SMMPA05763 | 34 | 32 | 32 | 39  | 33  | 32  | 44  | 40  | 63  |
| SMMPA05764 | 24 | 27 | 16 | 49  | 46  | 36  | 49  | 47  | 54  |
| SMMPA05765 | 1  | 3  | 1  | 8   | 8   | 9   | 13  | 18  | 17  |
| SMMPA05766 | 33 | 24 | 26 | 75  | 84  | 60  | 46  | 64  | 65  |
| SMMPA05767 | 10 | 15 | 12 | 61  | 45  | 44  | 28  | 38  | 35  |
| SMMPA05768 | 10 | 8  | 9  | 31  | 16  | 22  | 18  | 23  | 15  |
| SMMPA05769 | 43 | 49 | 37 | 466 | 387 | 323 | 216 | 282 | 252 |
| SMMPA05770 | 20 | 20 | 16 | 102 | 93  | 84  | 78  | 113 | 95  |
| SMMPA05771 | 16 | 24 | 22 | 93  | 95  | 71  | 60  | 51  | 65  |
| SMMPA05772 | 32 | 35 | 33 | 58  | 35  | 48  | 45  | 60  | 48  |
| SMMPA05773 | 8  | 7  | 10 | 26  | 19  | 19  | 26  | 21  | 33  |
| SMMPA05774 | 27 | 46 | 36 | 39  | 35  | 36  | 32  | 51  | 60  |
| SMMPA05775 | 13 | 17 | 13 | 39  | 35  | 26  | 21  | 37  | 30  |
| SMMPA05776 | 30 | 30 | 24 | 89  | 82  | 55  | 30  | 61  | 48  |
| SMMPA05777 | 22 | 21 | 23 | 52  | 53  | 39  | 34  | 51  | 35  |
| SMMPA05778 | 17 | 25 | 20 | 41  | 37  | 28  | 21  | 41  | 45  |
| SMMPA05779 | 15 | 14 | 11 | 32  | 32  | 33  | 16  | 17  | 29  |
| SMMPA05780 | 5  | 7  | 4  | 9   | 16  | 9   | 13  | 11  | 15  |
| SMMPA05781 | 7  | 5  | 1  | 24  | 18  | 13  | 11  | 21  | 11  |
| SMMPA05782 | 34 | 33 | 27 | 46  | 37  | 33  | 39  | 60  | 46  |
| SMMPA05783 | 18 | 30 | 23 | 45  | 28  | 32  | 32  | 53  | 39  |
| SMMPA05784 | 8  | 8  | 14 | 60  | 61  | 41  | 34  | 45  | 44  |

|            |    |    |    |     |     |     |     |     |     |
|------------|----|----|----|-----|-----|-----|-----|-----|-----|
| SMMPA05785 | 14 | 15 | 18 | 83  | 85  | 69  | 35  | 54  | 64  |
| SMMPA05786 | 41 | 35 | 34 | 239 | 211 | 173 | 73  | 93  | 62  |
| SMMPA05787 | 22 | 28 | 28 | 40  | 36  | 27  | 16  | 40  | 25  |
| SMMPA05788 | 16 | 17 | 19 | 46  | 43  | 31  | 47  | 54  | 44  |
| SMMPA05789 | 43 | 44 | 35 | 71  | 84  | 72  | 61  | 75  | 85  |
| SMMPA05790 | 30 | 34 | 25 | 75  | 56  | 53  | 49  | 59  | 57  |
| SMMPA05791 | 96 | 92 | 83 | 146 | 126 | 112 | 99  | 129 | 124 |
| SMMPA05792 | 28 | 16 | 14 | 28  | 25  | 26  | 18  | 23  | 28  |
| SMMPA05793 | 12 | 15 | 10 | 24  | 33  | 28  | 31  | 28  | 23  |
| SMMPA05794 | 27 | 32 | 27 | 54  | 58  | 35  | 34  | 60  | 42  |
| SMMPA05795 | 11 | 12 | 9  | 26  | 30  | 24  | 23  | 27  | 25  |
| SMMPA05796 | 8  | 16 | 8  | 16  | 12  | 18  | 13  | 10  | 10  |
| SMMPA05797 | 8  | 15 | 13 | 29  | 13  | 12  | 22  | 22  | 36  |
| SMMPA05798 | 14 | 9  | 7  | 26  | 18  | 14  | 20  | 34  | 30  |
| SMMPA05799 | 15 | 12 | 15 | 21  | 33  | 32  | 23  | 44  | 23  |
| SMMPA05800 | 11 | 10 | 8  | 28  | 36  | 17  | 12  | 20  | 18  |
| SMMPA05801 | 40 | 25 | 31 | 346 | 314 | 237 | 163 | 182 | 199 |
| SMMPA05802 | 7  | 18 | 12 | 62  | 62  | 40  | 32  | 38  | 42  |
| SMMPA05803 | 14 | 25 | 7  | 75  | 70  | 59  | 32  | 52  | 32  |
| SMMPA05804 | 18 | 20 | 16 | 57  | 46  | 48  | 32  | 41  | 34  |
| SMMPA05805 | 8  | 15 | 9  | 16  | 21  | 23  | 22  | 20  | 26  |
| SMMPA05806 | 9  | 3  | 8  | 12  | 11  | 12  | 11  | 11  | 13  |
| SMMPA05807 | 17 | 15 | 14 | 34  | 39  | 33  | 23  | 38  | 26  |
| SMMPA05808 | 4  | 11 | 5  | 7   | 5   | 7   | 7   | 10  | 10  |
| SMMPA05809 | 13 | 14 | 16 | 78  | 85  | 49  | 44  | 68  | 48  |
| SMMPA05810 | 25 | 28 | 26 | 67  | 55  | 65  | 51  | 53  | 41  |
| SMMPA05811 | 24 | 31 | 21 | 201 | 152 | 134 | 73  | 86  | 73  |
| SMMPA05812 | 1  | 4  | 4  | 3   | 4   | 4   | 2   | 1   | 4   |
| SMMPA05813 | 20 | 21 | 24 | 53  | 56  | 34  | 33  | 36  | 41  |
| SMMPA05814 | 21 | 26 | 21 | 61  | 56  | 55  | 43  | 50  | 56  |
| SMMPA05815 | 19 | 18 | 16 | 110 | 79  | 68  | 42  | 73  | 46  |
| SMMPA05816 | 13 | 12 | 11 | 53  | 44  | 35  | 17  | 17  | 19  |
| SMMPA05817 | 36 | 26 | 33 | 51  | 52  | 50  | 27  | 50  | 38  |
| SMMPA05818 | 36 | 30 | 36 | 103 | 118 | 88  | 58  | 71  | 54  |
| SMMPA05819 | 23 | 24 | 22 | 126 | 111 | 87  | 76  | 106 | 83  |
| SMMPA05820 | 24 | 31 | 25 | 47  | 34  | 39  | 27  | 32  | 42  |
| SMMPA05821 | 14 | 20 | 11 | 110 | 101 | 94  | 56  | 61  | 60  |
| SMMPA05822 | 14 | 25 | 21 | 112 | 95  | 87  | 51  | 66  | 76  |
| SMMPA05823 | 23 | 18 | 15 | 92  | 97  | 63  | 39  | 67  | 51  |
| SMMPA05824 | 32 | 29 | 23 | 134 | 127 | 123 | 75  | 79  | 72  |
| SMMPA05825 | 2  | 4  | 5  | 7   | 7   | 10  | 9   | 14  | 7   |

|            |    |    |    |     |     |     |    |     |    |
|------------|----|----|----|-----|-----|-----|----|-----|----|
| SMMPA05826 | 2  | 4  | 3  | 14  | 9   | 7   | 5  | 8   | 7  |
| SMMPA05827 | 20 | 13 | 8  | 52  | 49  | 31  | 20 | 34  | 35 |
| SMMPA05828 | 14 | 9  | 15 | 69  | 67  | 56  | 42 | 33  | 36 |
| SMMPA05829 | 23 | 18 | 17 | 42  | 38  | 31  | 24 | 34  | 37 |
| SMMPA05830 | 22 | 33 | 27 | 88  | 67  | 73  | 60 | 71  | 73 |
| SMMPA05831 | 10 | 11 | 6  | 37  | 44  | 33  | 10 | 25  | 29 |
| SMMPA05832 | 16 | 8  | 10 | 16  | 10  | 10  | 18 | 21  | 19 |
| SMMPA05833 | 4  | 5  | 3  | 9   | 7   | 6   | 9  | 7   | 9  |
| SMMPA05834 | 24 | 23 | 23 | 55  | 36  | 48  | 27 | 40  | 56 |
| SMMPA05835 | 39 | 36 | 21 | 88  | 105 | 69  | 47 | 57  | 56 |
| SMMPA05836 | 24 | 26 | 24 | 84  | 83  | 68  | 61 | 63  | 56 |
| SMMPA05837 | 44 | 45 | 35 | 87  | 88  | 64  | 59 | 86  | 78 |
| SMMPA05838 | 11 | 18 | 10 | 35  | 38  | 25  | 20 | 23  | 21 |
| SMMPA05839 | 24 | 32 | 24 | 123 | 117 | 70  | 51 | 67  | 67 |
| SMMPA05840 | 22 | 26 | 16 | 92  | 80  | 62  | 51 | 62  | 66 |
| SMMPA05841 | 8  | 9  | 5  | 12  | 8   | 10  | 5  | 11  | 14 |
| SMMPA05842 | 39 | 29 | 34 | 154 | 156 | 102 | 69 | 101 | 98 |
| SMMPA05843 | 27 | 34 | 29 | 104 | 70  | 69  | 57 | 87  | 69 |
| SMMPA05844 | 33 | 36 | 34 | 132 | 107 | 91  | 56 | 71  | 67 |
| SMMPA05845 | 17 | 21 | 14 | 30  | 24  | 19  | 14 | 25  | 31 |
| SMMPA05846 | 12 | 15 | 5  | 13  | 13  | 13  | 15 | 15  | 17 |
| SMMPA05847 | 8  | 10 | 11 | 10  | 8   | 8   | 10 | 13  | 20 |
| SMMPA05848 | 8  | 13 | 14 | 41  | 29  | 34  | 14 | 19  | 31 |
| SMMPA05849 | 7  | 18 | 16 | 13  | 17  | 11  | 18 | 18  | 23 |
| SMMPA05850 | 25 | 27 | 19 | 31  | 26  | 37  | 37 | 36  | 55 |
| SMMPA05851 | 20 | 8  | 16 | 26  | 16  | 13  | 21 | 28  | 12 |
| SMMPA05852 | 15 | 21 | 11 | 35  | 28  | 23  | 23 | 36  | 26 |
| SMMPA05853 | 23 | 22 | 24 | 28  | 20  | 27  | 37 | 42  | 48 |
| SMMPA05854 | 24 | 31 | 24 | 47  | 39  | 40  | 41 | 60  | 44 |
| SMMPA05855 | 23 | 23 | 18 | 27  | 28  | 22  | 27 | 44  | 43 |
| SMMPA05856 | 2  | 6  | 7  | 27  | 32  | 29  | 12 | 16  | 23 |
| SMMPA05857 | 16 | 17 | 15 | 16  | 21  | 11  | 32 | 28  | 30 |
| SMMPA05858 | 29 | 22 | 32 | 42  | 30  | 40  | 32 | 44  | 46 |
| SMMPA05859 | 28 | 18 | 19 | 14  | 26  | 22  | 23 | 21  | 40 |
| SMMPA05860 | 12 | 5  | 8  | 11  | 12  | 15  | 15 | 14  | 20 |
| SMMPA05861 | 9  | 7  | 5  | 10  | 6   | 1   | 11 | 14  | 14 |
| SMMPA05862 | 30 | 40 | 43 | 54  | 47  | 45  | 51 | 67  | 64 |
| SMMPA05863 | 26 | 19 | 10 | 36  | 41  | 27  | 37 | 57  | 59 |
| SMMPA05864 | 42 | 45 | 34 | 68  | 59  | 54  | 49 | 64  | 73 |
| SMMPA05865 | 14 | 16 | 11 | 43  | 42  | 43  | 24 | 56  | 45 |
| SMMPA05866 | 46 | 50 | 56 | 73  | 62  | 46  | 51 | 74  | 84 |



|            |     |     |     |     |     |     |    |     |     |
|------------|-----|-----|-----|-----|-----|-----|----|-----|-----|
| SMMPA05867 | 15  | 10  | 8   | 41  | 37  | 22  | 23 | 30  | 36  |
| SMMPA05868 | 16  | 15  | 13  | 70  | 75  | 51  | 33 | 41  | 54  |
| SMMPA05869 | 36  | 29  | 30  | 180 | 151 | 133 | 71 | 107 | 85  |
| SMMPA05870 | 15  | 23  | 8   | 98  | 78  | 72  | 52 | 50  | 60  |
| SMMPA05871 | 30  | 34  | 24  | 40  | 47  | 42  | 48 | 51  | 42  |
| SMMPA05872 | 16  | 14  | 14  | 30  | 23  | 21  | 19 | 29  | 29  |
| SMMPA05873 | 31  | 29  | 32  | 64  | 53  | 53  | 35 | 56  | 43  |
| SMMPA05874 | 12  | 13  | 12  | 46  | 44  | 31  | 23 | 31  | 41  |
| SMMPA05875 | 126 | 132 | 102 | 108 | 90  | 75  | 88 | 150 | 164 |
| SMMPA05876 | 20  | 20  | 23  | 50  | 30  | 25  | 29 | 32  | 38  |
| SMMPA05877 | 10  | 11  | 12  | 41  | 26  | 18  | 12 | 27  | 27  |
| SMMPA05878 | 28  | 37  | 29  | 46  | 32  | 31  | 24 | 30  | 27  |
| SMMPA05879 | 22  | 31  | 34  | 31  | 43  | 47  | 18 | 32  | 36  |
| SMMPA05880 | 20  | 24  | 19  | 59  | 63  | 49  | 39 | 50  | 30  |
| SMMPA05881 | 15  | 20  | 19  | 31  | 34  | 32  | 32 | 35  | 32  |
| SMMPA05882 | 30  | 35  | 38  | 74  | 47  | 46  | 51 | 48  | 53  |
| SMMPA05883 | 15  | 9   | 14  | 27  | 28  | 23  | 13 | 20  | 16  |
| SMMPA05884 | 23  | 28  | 19  | 46  | 37  | 43  | 29 | 45  | 30  |
| SMMPA05885 | 10  | 10  | 10  | 42  | 40  | 35  | 29 | 39  | 17  |
| SMMPA05886 | 21  | 27  | 18  | 23  | 27  | 26  | 21 | 24  | 23  |
| SMMPA05887 | 46  | 22  | 31  | 37  | 36  | 36  | 23 | 35  | 55  |
| SMMPA05888 | 31  | 38  | 36  | 151 | 139 | 105 | 78 | 84  | 92  |
| SMMPA05889 | 16  | 19  | 21  | 102 | 93  | 64  | 71 | 100 | 92  |
| SMMPA05890 | 25  | 29  | 19  | 102 | 102 | 70  | 51 | 73  | 71  |
| SMMPA05891 | 8   | 21  | 17  | 25  | 21  | 19  | 25 | 29  | 27  |
| SMMPA05892 | 35  | 34  | 24  | 33  | 27  | 31  | 35 | 53  | 44  |
| SMMPA05893 | 14  | 17  | 12  | 18  | 18  | 14  | 22 | 22  | 32  |
| SMMPA05894 | 31  | 47  | 28  | 54  | 39  | 40  | 37 | 35  | 51  |
| SMMPA05895 | 25  | 31  | 28  | 31  | 34  | 34  | 38 | 43  | 54  |
| SMMPA05896 | 54  | 41  | 46  | 136 | 151 | 119 | 83 | 94  | 82  |
| SMMPA05897 | 62  | 59  | 51  | 76  | 78  | 72  | 40 | 72  | 71  |
| SMMPA05898 | 38  | 55  | 25  | 40  | 32  | 33  | 37 | 33  | 45  |
| SMMPA05899 | 11  | 19  | 23  | 110 | 76  | 71  | 44 | 38  | 46  |
| SMMPA05900 | 17  | 22  | 19  | 37  | 23  | 20  | 36 | 30  | 31  |
| SMMPA05901 | 24  | 12  | 13  | 55  | 42  | 35  | 29 | 33  | 23  |
| SMMPA05902 | 14  | 20  | 15  | 90  | 85  | 69  | 40 | 33  | 31  |
| SMMPA05903 | 17  | 17  | 10  | 64  | 50  | 38  | 34 | 45  | 70  |
| SMMPA05904 | 9   | 10  | 12  | 19  | 11  | 12  | 16 | 18  | 18  |
| SMMPA05905 | 28  | 32  | 26  | 55  | 57  | 38  | 33 | 41  | 49  |
| SMMPA05906 | 9   | 8   | 9   | 25  | 18  | 13  | 14 | 34  | 28  |
| SMMPA05907 | 16  | 20  | 13  | 33  | 30  | 23  | 25 | 22  | 34  |

|            |    |    |    |     |     |     |     |     |     |
|------------|----|----|----|-----|-----|-----|-----|-----|-----|
| SMMPA05908 | 32 | 33 | 26 | 57  | 75  | 46  | 26  | 43  | 35  |
| SMMPA05909 | 15 | 21 | 17 | 39  | 39  | 34  | 22  | 28  | 32  |
| SMMPA05910 | 9  | 8  | 4  | 20  | 17  | 13  | 16  | 13  | 19  |
| SMMPA05911 | 22 | 29 | 26 | 22  | 20  | 17  | 19  | 48  | 33  |
| SMMPA05912 | 37 | 42 | 41 | 77  | 59  | 47  | 59  | 70  | 63  |
| SMMPA05913 | 34 | 39 | 24 | 271 | 222 | 160 | 112 | 135 | 142 |
| SMMPA05914 | 34 | 46 | 35 | 130 | 97  | 101 | 47  | 68  | 71  |
| SMMPA05915 | 26 | 31 | 26 | 42  | 54  | 42  | 59  | 65  | 79  |
| SMMPA05916 | 14 | 9  | 16 | 26  | 21  | 19  | 20  | 34  | 14  |
| SMMPA05917 | 14 | 22 | 20 | 34  | 28  | 27  | 34  | 42  | 31  |
| SMMPA05918 | 10 | 13 | 15 | 130 | 114 | 89  | 48  | 63  | 71  |
| SMMPA05919 | 15 | 34 | 25 | 57  | 51  | 32  | 41  | 48  | 50  |
| SMMPA05920 | 7  | 1  | 2  | 3   | 3   | 2   | 4   | 1   | 4   |
| SMMPA05921 | 12 | 19 | 16 | 15  | 14  | 22  | 21  | 34  | 23  |
| SMMPA05922 | 16 | 13 | 10 | 23  | 32  | 27  | 23  | 31  | 25  |
| SMMPA05923 | 27 | 25 | 18 | 35  | 28  | 37  | 35  | 42  | 47  |
| SMMPA05924 | 11 | 15 | 16 | 19  | 15  | 13  | 14  | 23  | 18  |
| SMMPA05925 | 11 | 19 | 13 | 34  | 24  | 19  | 32  | 38  | 24  |
| SMMPA05926 | 33 | 37 | 22 | 51  | 63  | 44  | 35  | 46  | 49  |
| SMMPA05927 | 6  | 5  | 10 | 26  | 29  | 22  | 7   | 2   | 8   |
| SMMPA05928 | 20 | 13 | 14 | 26  | 19  | 29  | 22  | 33  | 27  |
| SMMPA05929 | 24 | 12 | 20 | 47  | 34  | 39  | 26  | 33  | 35  |
| SMMPA05930 | 9  | 9  | 14 | 19  | 12  | 9   | 5   | 14  | 10  |
| SMMPA05931 | 24 | 23 | 22 | 31  | 33  | 27  | 27  | 32  | 31  |
| SMMPA05932 | 55 | 74 | 60 | 37  | 18  | 34  | 45  | 61  | 78  |
| SMMPA05933 | 38 | 41 | 22 | 36  | 28  | 24  | 23  | 36  | 43  |
| SMMPA05934 | 88 | 98 | 91 | 59  | 67  | 55  | 80  | 101 | 115 |
| SMMPA05935 | 85 | 94 | 68 | 66  | 50  | 48  | 61  | 93  | 89  |
| SMMPA05936 | 39 | 40 | 30 | 25  | 20  | 16  | 31  | 34  | 43  |
| SMMPA05937 | 52 | 63 | 52 | 23  | 26  | 33  | 55  | 68  | 49  |
| SMMPA05938 | 16 | 14 | 20 | 49  | 31  | 37  | 50  | 62  | 57  |
| SMMPA05939 | 15 | 28 | 22 | 38  | 31  | 37  | 63  | 76  | 87  |
| SMMPA05940 | 27 | 22 | 19 | 76  | 89  | 63  | 106 | 103 | 106 |
| SMMPA05941 | 31 | 28 | 25 | 74  | 81  | 76  | 89  | 145 | 118 |
| SMMPA05942 | 22 | 27 | 11 | 80  | 83  | 69  | 94  | 103 | 86  |
| SMMPA05943 | 23 | 24 | 27 | 84  | 100 | 62  | 83  | 146 | 125 |
| SMMPA05944 | 16 | 19 | 31 | 110 | 100 | 64  | 85  | 103 | 122 |
| SMMPA05945 | 20 | 18 | 16 | 43  | 57  | 31  | 49  | 75  | 65  |
| SMMPA05946 | 21 | 16 | 11 | 63  | 43  | 47  | 73  | 63  | 75  |
| SMMPA05947 | 4  | 6  | 5  | 10  | 4   | 5   | 2   | 8   | 10  |
| SMMPA05948 | 17 | 24 | 24 | 61  | 70  | 48  | 40  | 42  | 64  |

|            |    |    |    |     |     |     |     |     |     |
|------------|----|----|----|-----|-----|-----|-----|-----|-----|
| SMMPA05949 | 13 | 28 | 16 | 56  | 54  | 33  | 26  | 45  | 43  |
| SMMPA05950 | 18 | 8  | 22 | 27  | 32  | 18  | 27  | 37  | 22  |
| SMMPA05951 | 21 | 24 | 15 | 45  | 52  | 42  | 46  | 48  | 60  |
| SMMPA05952 | 18 | 18 | 15 | 28  | 35  | 33  | 29  | 52  | 25  |
| SMMPA05953 | 18 | 22 | 12 | 59  | 60  | 45  | 47  | 42  | 68  |
| SMMPA05954 | 13 | 13 | 10 | 20  | 28  | 26  | 12  | 21  | 18  |
| SMMPA05955 | 9  | 11 | 21 | 36  | 40  | 31  | 34  | 40  | 44  |
| SMMPA05956 | 12 | 13 | 12 | 57  | 62  | 48  | 55  | 67  | 53  |
| SMMPA05957 | 28 | 24 | 21 | 57  | 42  | 32  | 38  | 49  | 38  |
| SMMPA05958 | 15 | 17 | 10 | 62  | 60  | 55  | 47  | 53  | 82  |
| SMMPA05959 | 11 | 17 | 15 | 23  | 28  | 23  | 20  | 29  | 25  |
| SMMPA05960 | 14 | 17 | 19 | 65  | 59  | 47  | 34  | 41  | 38  |
| SMMPA05961 | 30 | 45 | 33 | 159 | 174 | 140 | 81  | 114 | 97  |
| SMMPA05962 | 15 | 15 | 22 | 96  | 92  | 79  | 44  | 64  | 51  |
| SMMPA05963 | 23 | 26 | 17 | 148 | 131 | 101 | 73  | 82  | 95  |
| SMMPA05964 | 28 | 24 | 29 | 158 | 142 | 113 | 69  | 84  | 85  |
| SMMPA05965 | 19 | 21 | 24 | 262 | 229 | 155 | 129 | 173 | 168 |
| SMMPA05966 | 32 | 34 | 26 | 84  | 90  | 78  | 54  | 80  | 58  |
| SMMPA05967 | 10 | 9  | 6  | 10  | 12  | 9   | 21  | 22  | 17  |
| SMMPA05968 | 6  | 5  | 6  | 10  | 11  | 13  | 14  | 15  | 21  |
| SMMPA05969 | 9  | 5  | 9  | 5   | 8   | 10  | 15  | 13  | 15  |
| SMMPA05970 | 18 | 14 | 24 | 24  | 14  | 15  | 38  | 36  | 44  |
| SMMPA05971 | 8  | 8  | 5  | 5   | 4   | 9   | 10  | 18  | 12  |
| SMMPA05972 | 6  | 11 | 4  | 2   | 1   | 6   | 18  | 12  | 14  |
| SMMPA05973 | 12 | 7  | 9  | 12  | 14  | 23  | 31  | 22  | 41  |
| SMMPA05974 | 14 | 9  | 11 | 7   | 9   | 14  | 21  | 33  | 22  |
| SMMPA05975 | 9  | 20 | 4  | 12  | 12  | 20  | 19  | 31  | 43  |
| SMMPA05976 | 18 | 15 | 14 | 142 | 129 | 97  | 43  | 66  | 59  |
| SMMPA05977 | 22 | 32 | 29 | 272 | 245 | 228 | 85  | 110 | 109 |
| SMMPA05978 | 38 | 23 | 18 | 194 | 166 | 130 | 64  | 95  | 84  |
| SMMPA05979 | 15 | 14 | 15 | 51  | 44  | 42  | 31  | 32  | 41  |
| SMMPA05980 | 21 | 24 | 17 | 138 | 138 | 99  | 62  | 90  | 91  |
| SMMPA05981 | 34 | 50 | 31 | 78  | 56  | 56  | 49  | 71  | 57  |
| SMMPA05982 | 42 | 26 | 21 | 134 | 124 | 73  | 64  | 79  | 86  |
| SMMPA05983 | 33 | 31 | 27 | 90  | 102 | 56  | 47  | 78  | 49  |
| SMMPA05984 | 24 | 26 | 26 | 78  | 63  | 51  | 57  | 63  | 59  |
| SMMPA05985 | 19 | 27 | 17 | 222 | 209 | 164 | 102 | 138 | 120 |
| SMMPA05986 | 21 | 19 | 12 | 9   | 7   | 11  | 17  | 22  | 19  |
| SMMPA05987 | 11 | 16 | 11 | 23  | 17  | 19  | 22  | 20  | 19  |
| SMMPA05988 | 30 | 28 | 36 | 57  | 33  | 40  | 27  | 58  | 45  |
| SMMPA05989 | 7  | 7  | 3  | 12  | 8   | 5   | 10  | 11  | 8   |

|            |    |    |    |     |     |     |     |     |     |
|------------|----|----|----|-----|-----|-----|-----|-----|-----|
| SMMPA05990 | 20 | 11 | 9  | 163 | 147 | 118 | 59  | 99  | 60  |
| SMMPA05991 | 15 | 21 | 14 | 28  | 28  | 18  | 24  | 32  | 34  |
| SMMPA05992 | 38 | 31 | 27 | 456 | 384 | 374 | 216 | 303 | 285 |
| SMMPA05993 | 12 | 12 | 10 | 59  | 64  | 60  | 23  | 34  | 29  |
| SMMPA05994 | 13 | 7  | 13 | 17  | 10  | 11  | 11  | 20  | 14  |
| SMMPA05995 | 35 | 32 | 31 | 851 | 765 | 644 | 329 | 437 | 400 |
| SMMPA05996 | 17 | 13 | 25 | 315 | 285 | 225 | 110 | 137 | 145 |
| SMMPA05997 | 36 | 26 | 31 | 69  | 76  | 70  | 49  | 62  | 62  |
| SMMPA05998 | 18 | 32 | 13 | 51  | 65  | 63  | 38  | 38  | 25  |
| SMMPA05999 | 22 | 18 | 16 | 26  | 26  | 24  | 17  | 22  | 28  |
| SMMPA06000 | 10 | 5  | 13 | 36  | 26  | 25  | 24  | 27  | 18  |
| SMMPA06001 | 6  | 5  | 9  | 37  | 26  | 15  | 3   | 7   | 10  |
| SMMPA06002 | 13 | 13 | 20 | 39  | 41  | 33  | 31  | 33  | 31  |
| SMMPA06003 | 11 | 21 | 7  | 25  | 22  | 21  | 18  | 19  | 18  |
| SMMPA06004 | 20 | 18 | 11 | 16  | 15  | 12  | 15  | 18  | 21  |
| SMMPA06005 | 21 | 11 | 11 | 28  | 27  | 19  | 18  | 21  | 30  |
| SMMPA06006 | 7  | 5  | 7  | 9   | 5   | 4   | 5   | 7   | 7   |
| SMMPA06007 | 17 | 16 | 17 | 21  | 19  | 24  | 15  | 30  | 18  |
| SMMPA06008 | 9  | 10 | 7  | 16  | 16  | 18  | 15  | 16  | 11  |
| SMMPA06009 | 21 | 43 | 33 | 28  | 32  | 17  | 26  | 53  | 31  |
| SMMPA06010 | 23 | 19 | 27 | 14  | 15  | 32  | 13  | 29  | 26  |
| SMMPA06011 | 10 | 25 | 11 | 18  | 11  | 16  | 12  | 23  | 17  |
| SMMPA06012 | 16 | 13 | 9  | 26  | 22  | 18  | 18  | 24  | 23  |
| SMMPA06013 | 51 | 45 | 43 | 50  | 62  | 49  | 42  | 69  | 67  |
| SMMPA06014 | 22 | 12 | 16 | 25  | 24  | 18  | 38  | 31  | 38  |
| SMMPA06015 | 30 | 45 | 23 | 32  | 35  | 24  | 55  | 66  | 66  |
| SMMPA06016 | 24 | 32 | 25 | 21  | 24  | 20  | 30  | 21  | 23  |
| SMMPA06017 | 25 | 13 | 16 | 32  | 27  | 32  | 34  | 45  | 44  |
| SMMPA06018 | 20 | 36 | 21 | 44  | 40  | 33  | 58  | 66  | 44  |
| SMMPA06019 | 23 | 29 | 21 | 170 | 136 | 120 | 116 | 163 | 179 |
| SMMPA06020 | 26 | 40 | 27 | 54  | 46  | 31  | 39  | 70  | 63  |
| SMMPA06021 | 82 | 77 | 54 | 115 | 73  | 77  | 113 | 147 | 147 |
| SMMPA06022 | 26 | 32 | 26 | 107 | 96  | 67  | 71  | 82  | 76  |
| SMMPA06023 | 17 | 21 | 30 | 117 | 118 | 90  | 81  | 86  | 86  |
| SMMPA06024 | 41 | 42 | 30 | 83  | 71  | 57  | 62  | 80  | 75  |
| SMMPA06025 | 23 | 7  | 21 | 34  | 33  | 32  | 24  | 30  | 43  |
| SMMPA06026 | 15 | 8  | 13 | 44  | 32  | 29  | 30  | 25  | 30  |
| SMMPA06027 | 24 | 23 | 20 | 150 | 146 | 104 | 78  | 119 | 102 |
| SMMPA06028 | 43 | 24 | 50 | 96  | 84  | 84  | 74  | 69  | 66  |
| SMMPA06029 | 31 | 37 | 26 | 63  | 46  | 37  | 49  | 44  | 42  |
| SMMPA06030 | 31 | 29 | 23 | 80  | 81  | 62  | 52  | 54  | 61  |

|            |    |    |    |     |     |     |     |     |     |
|------------|----|----|----|-----|-----|-----|-----|-----|-----|
| SMMPA06031 | 31 | 38 | 29 | 84  | 89  | 71  | 41  | 78  | 65  |
| SMMPA06032 | 14 | 19 | 24 | 36  | 32  | 27  | 41  | 50  | 54  |
| SMMPA06033 | 31 | 33 | 24 | 80  | 73  | 67  | 45  | 57  | 48  |
| SMMPA06034 | 28 | 27 | 24 | 36  | 36  | 47  | 34  | 49  | 38  |
| SMMPA06035 | 23 | 15 | 20 | 15  | 26  | 14  | 29  | 40  | 30  |
| SMMPA06036 | 32 | 38 | 23 | 59  | 43  | 44  | 51  | 59  | 51  |
| SMMPA06037 | 34 | 23 | 29 | 49  | 37  | 36  | 29  | 44  | 34  |
| SMMPA06038 | 45 | 59 | 47 | 30  | 24  | 23  | 26  | 47  | 47  |
| SMMPA06039 | 23 | 35 | 32 | 59  | 53  | 36  | 28  | 50  | 33  |
| SMMPA06040 | 36 | 17 | 30 | 270 | 238 | 191 | 154 | 202 | 159 |
| SMMPA06041 | 13 | 16 | 13 | 130 | 108 | 83  | 66  | 88  | 67  |
| SMMPA06042 | 15 | 15 | 5  | 24  | 33  | 22  | 34  | 33  | 38  |
| SMMPA06043 | 14 | 17 | 16 | 44  | 53  | 28  | 31  | 57  | 44  |
| SMMPA06044 | 31 | 29 | 27 | 62  | 45  | 55  | 38  | 60  | 50  |
| SMMPA06045 | 39 | 37 | 25 | 53  | 74  | 51  | 57  | 48  | 48  |
| SMMPA06046 | 15 | 12 | 14 | 67  | 47  | 36  | 32  | 40  | 43  |
| SMMPA06047 | 18 | 15 | 16 | 35  | 33  | 41  | 44  | 44  | 49  |
| SMMPA06048 | 17 | 10 | 11 | 44  | 55  | 40  | 28  | 44  | 48  |
| SMMPA06049 | 34 | 28 | 24 | 30  | 34  | 29  | 34  | 32  | 20  |
| SMMPA06050 | 15 | 18 | 9  | 39  | 20  | 26  | 31  | 34  | 20  |
| SMMPA06051 | 19 | 17 | 19 | 59  | 65  | 43  | 38  | 45  | 40  |
| SMMPA06052 | 27 | 24 | 29 | 51  | 47  | 48  | 33  | 42  | 40  |
| SMMPA06053 | 21 | 18 | 14 | 6   | 8   | 4   | 19  | 30  | 25  |
| SMMPA06054 | 6  | 9  | 8  | 64  | 62  | 62  | 35  | 40  | 34  |
| SMMPA06055 | 26 | 22 | 8  | 28  | 35  | 15  | 20  | 23  | 11  |
| SMMPA06056 | 25 | 19 | 17 | 11  | 19  | 25  | 14  | 28  | 26  |
| SMMPA06057 | 27 | 28 | 27 | 45  | 41  | 50  | 32  | 36  | 35  |
| SMMPA06058 | 42 | 47 | 29 | 32  | 29  | 29  | 37  | 35  | 53  |
| SMMPA06059 | 15 | 30 | 12 | 26  | 29  | 33  | 23  | 34  | 41  |
| SMMPA06060 | 10 | 12 | 8  | 20  | 21  | 21  | 9   | 13  | 16  |
| SMMPA06061 | 10 | 12 | 11 | 47  | 49  | 45  | 20  | 27  | 30  |
| SMMPA06062 | 28 | 26 | 21 | 61  | 67  | 52  | 35  | 66  | 54  |
| SMMPA06063 | 32 | 17 | 26 | 79  | 73  | 51  | 52  | 86  | 81  |
| SMMPA06064 | 26 | 22 | 30 | 49  | 47  | 33  | 28  | 33  | 46  |
| SMMPA06065 | 9  | 12 | 10 | 40  | 29  | 21  | 3   | 18  | 14  |
| SMMPA06066 | 20 | 22 | 23 | 11  | 20  | 17  | 22  | 34  | 28  |
| SMMPA06067 | 27 | 25 | 23 | 49  | 26  | 32  | 21  | 32  | 29  |
| SMMPA06068 | 30 | 23 | 26 | 35  | 27  | 26  | 30  | 25  | 36  |
| SMMPA06069 | 36 | 26 | 27 | 37  | 39  | 43  | 18  | 23  | 17  |
| SMMPA06070 | 22 | 14 | 28 | 25  | 20  | 29  | 14  | 29  | 16  |
| SMMPA06071 | 38 | 43 | 14 | 73  | 72  | 62  | 33  | 58  | 56  |

|            |    |    |    |     |     |     |     |     |     |
|------------|----|----|----|-----|-----|-----|-----|-----|-----|
| SMMPA06072 | 46 | 52 | 37 | 90  | 73  | 61  | 80  | 89  | 80  |
| SMMPA06073 | 29 | 28 | 35 | 101 | 80  | 74  | 46  | 59  | 56  |
| SMMPA06074 | 18 | 25 | 28 | 47  | 46  | 21  | 25  | 44  | 23  |
| SMMPA06075 | 44 | 58 | 39 | 81  | 58  | 73  | 83  | 93  | 79  |
| SMMPA06076 | 31 | 36 | 28 | 46  | 53  | 37  | 38  | 43  | 50  |
| SMMPA06077 | 20 | 22 | 29 | 418 | 450 | 365 | 194 | 226 | 248 |
| SMMPA06078 | 43 | 36 | 28 | 222 | 196 | 159 | 104 | 126 | 131 |
| SMMPA06079 | 38 | 39 | 23 | 48  | 40  | 48  | 33  | 47  | 37  |
| SMMPA06080 | 24 | 43 | 35 | 101 | 77  | 66  | 69  | 98  | 68  |
| SMMPA06081 | 38 | 35 | 29 | 72  | 54  | 44  | 37  | 47  | 60  |
| SMMPA06082 | 34 | 18 | 16 | 90  | 75  | 57  | 26  | 48  | 47  |
| SMMPA06083 | 23 | 27 | 22 | 44  | 42  | 39  | 26  | 49  | 29  |
| SMMPA06084 | 51 | 32 | 29 | 39  | 32  | 36  | 40  | 42  | 68  |
| SMMPA06085 | 37 | 36 | 38 | 155 | 148 | 99  | 87  | 95  | 97  |
| SMMPA06086 | 40 | 47 | 35 | 162 | 146 | 107 | 88  | 98  | 90  |
| SMMPA06087 | 29 | 20 | 26 | 58  | 71  | 40  | 43  | 44  | 39  |
| SMMPA06088 | 11 | 8  | 14 | 37  | 40  | 33  | 31  | 32  | 24  |
| SMMPA06089 | 13 | 27 | 20 | 41  | 31  | 29  | 22  | 20  | 32  |
| SMMPA06090 | 37 | 33 | 38 | 109 | 101 | 60  | 51  | 88  | 68  |
| SMMPA06091 | 26 | 20 | 24 | 401 | 383 | 298 | 166 | 247 | 222 |
| SMMPA06092 | 13 | 11 | 10 | 32  | 30  | 26  | 22  | 27  | 23  |
| SMMPA06093 | 13 | 11 | 17 | 45  | 36  | 43  | 35  | 54  | 40  |
| SMMPA06094 | 13 | 17 | 17 | 402 | 357 | 343 | 194 | 253 | 275 |
| SMMPA06095 | 24 | 17 | 19 | 107 | 109 | 94  | 60  | 60  | 55  |
| SMMPA06096 | 8  | 13 | 13 | 60  | 67  | 46  | 33  | 32  | 45  |
| SMMPA06097 | 28 | 18 | 25 | 87  | 80  | 66  | 46  | 61  | 57  |
| SMMPA06098 | 39 | 32 | 39 | 69  | 42  | 55  | 44  | 60  | 60  |
| SMMPA06099 | 3  | 2  | 1  | 9   | 2   | 2   | 6   | 6   | 6   |
| SMMPA06100 | 22 | 19 | 24 | 73  | 86  | 62  | 57  | 60  | 78  |
| SMMPA06101 | 20 | 29 | 17 | 97  | 75  | 56  | 40  | 50  | 43  |
| SMMPA06102 | 23 | 34 | 17 | 60  | 39  | 42  | 45  | 49  | 51  |
| SMMPA06103 | 25 | 15 | 15 | 35  | 27  | 37  | 21  | 23  | 42  |
| SMMPA06104 | 26 | 23 | 18 | 45  | 28  | 23  | 23  | 32  | 41  |
| SMMPA06105 | 17 | 12 | 16 | 23  | 19  | 15  | 23  | 28  | 19  |
| SMMPA06106 | 18 | 20 | 22 | 62  | 55  | 38  | 55  | 78  | 82  |
| SMMPA06107 | 26 | 24 | 24 | 34  | 26  | 29  | 27  | 28  | 29  |
| SMMPA06108 | 16 | 19 | 21 | 89  | 76  | 69  | 61  | 67  | 63  |
| SMMPA06109 | 19 | 16 | 13 | 94  | 64  | 67  | 50  | 53  | 57  |
| SMMPA06110 | 18 | 20 | 24 | 148 | 139 | 124 | 78  | 110 | 96  |
| SMMPA06111 | 8  | 10 | 7  | 322 | 355 | 318 | 265 | 360 | 332 |
| SMMPA06112 | 7  | 9  | 9  | 6   | 8   | 6   | 9   | 12  | 6   |

|            |    |    |    |     |     |     |     |     |     |
|------------|----|----|----|-----|-----|-----|-----|-----|-----|
| SMMPA06113 | 34 | 27 | 14 | 43  | 42  | 30  | 33  | 55  | 33  |
| SMMPA06114 | 30 | 28 | 33 | 45  | 47  | 34  | 37  | 38  | 54  |
| SMMPA06115 | 11 | 9  | 8  | 18  | 20  | 18  | 13  | 14  | 14  |
| SMMPA06116 | 20 | 16 | 15 | 12  | 13  | 12  | 20  | 23  | 25  |
| SMMPA06117 | 41 | 47 | 46 | 71  | 75  | 47  | 44  | 69  | 54  |
| SMMPA06118 | 51 | 44 | 46 | 61  | 63  | 46  | 47  | 66  | 56  |
| SMMPA06119 | 19 | 19 | 22 | 34  | 28  | 23  | 29  | 36  | 34  |
| SMMPA06120 | 20 | 27 | 20 | 23  | 33  | 27  | 24  | 29  | 35  |
| SMMPA06121 | 29 | 22 | 24 | 83  | 77  | 66  | 55  | 86  | 72  |
| SMMPA06122 | 11 | 14 | 13 | 56  | 49  | 43  | 25  | 33  | 43  |
| SMMPA06123 | 21 | 10 | 21 | 95  | 87  | 51  | 48  | 50  | 58  |
| SMMPA06124 | 45 | 28 | 26 | 76  | 64  | 61  | 51  | 55  | 67  |
| SMMPA06125 | 32 | 36 | 21 | 55  | 51  | 27  | 45  | 58  | 51  |
| SMMPA06126 | 35 | 23 | 24 | 107 | 92  | 52  | 47  | 71  | 75  |
| SMMPA06127 | 15 | 15 | 18 | 210 | 157 | 126 | 57  | 78  | 70  |
| SMMPA06128 | 17 | 12 | 16 | 125 | 125 | 64  | 56  | 78  | 92  |
| SMMPA06129 | 22 | 31 | 29 | 191 | 193 | 145 | 109 | 145 | 124 |
| SMMPA06130 | 3  | 8  | 6  | 24  | 33  | 22  | 15  | 9   | 15  |
| SMMPA06131 | 18 | 21 | 17 | 79  | 78  | 81  | 48  | 63  | 57  |
| SMMPA06132 | 35 | 16 | 21 | 150 | 133 | 113 | 79  | 82  | 82  |
| SMMPA06133 | 15 | 17 | 19 | 44  | 48  | 35  | 36  | 64  | 41  |
| SMMPA06134 | 23 | 25 | 18 | 174 | 157 | 147 | 57  | 80  | 78  |
| SMMPA06135 | 28 | 21 | 24 | 98  | 94  | 57  | 56  | 77  | 61  |
| SMMPA06136 | 6  | 9  | 5  | 21  | 24  | 18  | 13  | 23  | 27  |
| SMMPA06137 | 25 | 11 | 9  | 37  | 43  | 42  | 27  | 31  | 23  |
| SMMPA06138 | 47 | 41 | 41 | 110 | 124 | 87  | 88  | 111 | 95  |
| SMMPA06139 | 16 | 19 | 22 | 48  | 33  | 28  | 25  | 35  | 30  |
| SMMPA06140 | 15 | 15 | 18 | 39  | 46  | 26  | 31  | 25  | 39  |
| SMMPA06141 | 22 | 29 | 20 | 123 | 109 | 85  | 49  | 71  | 57  |
| SMMPA06142 | 9  | 11 | 8  | 24  | 24  | 16  | 24  | 31  | 27  |
| SMMPA06143 | 20 | 33 | 23 | 57  | 49  | 45  | 22  | 40  | 37  |
| SMMPA06144 | 16 | 12 | 14 | 21  | 24  | 33  | 20  | 22  | 26  |
| SMMPA06145 | 21 | 33 | 19 | 36  | 33  | 27  | 20  | 24  | 30  |
| SMMPA06146 | 16 | 18 | 17 | 50  | 45  | 43  | 28  | 36  | 23  |
| SMMPA06147 | 22 | 20 | 19 | 54  | 70  | 52  | 38  | 62  | 53  |
| SMMPA06148 | 24 | 19 | 15 | 45  | 33  | 26  | 25  | 36  | 33  |
| SMMPA06149 | 66 | 76 | 68 | 76  | 79  | 82  | 34  | 54  | 62  |
| SMMPA06150 | 24 | 15 | 14 | 36  | 24  | 26  | 18  | 25  | 22  |
| SMMPA06151 | 33 | 26 | 21 | 46  | 36  | 47  | 27  | 32  | 45  |
| SMMPA06152 | 46 | 53 | 41 | 127 | 130 | 103 | 44  | 61  | 71  |
| SMMPA06153 | 19 | 25 | 22 | 59  | 67  | 47  | 42  | 56  | 45  |

|            |    |    |    |     |     |     |    |    |    |
|------------|----|----|----|-----|-----|-----|----|----|----|
| SMMPA06154 | 62 | 58 | 49 | 49  | 57  | 38  | 35 | 62 | 54 |
| SMMPA06155 | 29 | 31 | 22 | 161 | 162 | 102 | 55 | 91 | 80 |
| SMMPA06156 | 19 | 22 | 17 | 22  | 24  | 19  | 15 | 26 | 33 |
| SMMPA06157 | 14 | 16 | 16 | 24  | 30  | 26  | 16 | 13 | 20 |
| SMMPA06158 | 19 | 15 | 13 | 42  | 56  | 42  | 27 | 38 | 32 |
| SMMPA06159 | 28 | 18 | 23 | 71  | 60  | 40  | 36 | 40 | 35 |
| SMMPA06160 | 38 | 26 | 38 | 33  | 35  | 41  | 47 | 39 | 45 |
| SMMPA06161 | 15 | 22 | 19 | 49  | 34  | 32  | 21 | 33 | 31 |
| SMMPA06162 | 21 | 24 | 28 | 80  | 68  | 61  | 51 | 48 | 60 |
| SMMPA06163 | 22 | 21 | 18 | 42  | 41  | 36  | 36 | 39 | 51 |
| SMMPA06164 | 0  | 1  | 2  | 1   | 1   | 4   | 7  | 0  | 2  |
| SMMPA06165 | 44 | 37 | 36 | 78  | 86  | 69  | 79 | 78 | 69 |
| SMMPA06166 | 10 | 9  | 10 | 16  | 14  | 21  | 24 | 33 | 25 |
| SMMPA06167 | 18 | 19 | 26 | 16  | 22  | 18  | 22 | 21 | 22 |
| SMMPA06168 | 23 | 34 | 34 | 23  | 24  | 22  | 32 | 42 | 39 |
| SMMPA06169 | 41 | 42 | 29 | 31  | 36  | 27  | 49 | 60 | 42 |
| SMMPA06170 | 22 | 13 | 21 | 11  | 16  | 19  | 16 | 15 | 15 |
| SMMPA06171 | 26 | 35 | 22 | 21  | 23  | 31  | 21 | 25 | 28 |
| SMMPA06172 | 39 | 36 | 21 | 64  | 59  | 44  | 41 | 59 | 58 |
| SMMPA06173 | 17 | 21 | 21 | 20  | 31  | 25  | 15 | 31 | 23 |
| SMMPA06174 | 32 | 29 | 32 | 34  | 20  | 34  | 36 | 43 | 43 |
| SMMPA06175 | 20 | 32 | 19 | 18  | 20  | 31  | 21 | 28 | 31 |
| SMMPA06176 | 31 | 24 | 24 | 57  | 46  | 46  | 29 | 45 | 24 |
| SMMPA06177 | 17 | 17 | 11 | 22  | 13  | 21  | 19 | 25 | 28 |
| SMMPA06178 | 26 | 26 | 31 | 41  | 35  | 29  | 43 | 43 | 35 |
| SMMPA06179 | 36 | 28 | 21 | 35  | 27  | 35  | 30 | 32 | 27 |
| SMMPA06180 | 22 | 35 | 33 | 29  | 33  | 25  | 27 | 47 | 29 |
| SMMPA06181 | 30 | 33 | 53 | 44  | 35  | 37  | 51 | 77 | 75 |
| SMMPA06182 | 23 | 35 | 20 | 43  | 47  | 25  | 27 | 47 | 23 |
| SMMPA06183 | 1  | 1  | 1  | 3   | 2   | 1   | 3  | 6  | 4  |
| SMMPA06184 | 22 | 21 | 21 | 27  | 26  | 34  | 14 | 26 | 19 |
| SMMPA06185 | 69 | 74 | 82 | 56  | 58  | 51  | 56 | 45 | 58 |
| SMMPA06186 | 22 | 28 | 20 | 45  | 40  | 34  | 37 | 35 | 49 |
| SMMPA06187 | 10 | 7  | 7  | 28  | 16  | 26  | 4  | 6  | 6  |
| SMMPA06188 | 25 | 26 | 28 | 85  | 87  | 66  | 41 | 68 | 50 |
| SMMPA06189 | 15 | 22 | 12 | 21  | 16  | 16  | 19 | 30 | 39 |
| SMMPA06190 | 13 | 9  | 18 | 39  | 22  | 21  | 31 | 32 | 25 |
| SMMPA06191 | 27 | 25 | 27 | 39  | 26  | 27  | 39 | 43 | 43 |
| SMMPA06192 | 16 | 24 | 25 | 64  | 41  | 61  | 31 | 37 | 43 |
| SMMPA06193 | 15 | 12 | 22 | 42  | 52  | 36  | 31 | 37 | 33 |
| SMMPA06194 | 35 | 45 | 50 | 92  | 85  | 85  | 62 | 76 | 64 |



|            |    |    |    |     |     |     |     |     |     |
|------------|----|----|----|-----|-----|-----|-----|-----|-----|
| SMMPA06195 | 13 | 15 | 10 | 17  | 26  | 17  | 11  | 25  | 18  |
| SMMPA06196 | 23 | 41 | 29 | 74  | 49  | 45  | 56  | 74  | 74  |
| SMMPA06197 | 25 | 22 | 23 | 58  | 52  | 36  | 39  | 66  | 48  |
| SMMPA06198 | 21 | 23 | 17 | 60  | 53  | 47  | 53  | 71  | 63  |
| SMMPA06199 | 34 | 34 | 23 | 44  | 54  | 41  | 42  | 48  | 65  |
| SMMPA06200 | 19 | 24 | 16 | 96  | 104 | 100 | 49  | 69  | 91  |
| SMMPA06201 | 26 | 21 | 12 | 111 | 116 | 81  | 97  | 101 | 129 |
| SMMPA06202 | 16 | 22 | 20 | 41  | 34  | 42  | 30  | 47  | 49  |
| SMMPA06203 | 38 | 32 | 39 | 133 | 102 | 76  | 71  | 78  | 62  |
| SMMPA06204 | 32 | 13 | 18 | 50  | 40  | 29  | 31  | 43  | 59  |
| SMMPA06205 | 41 | 39 | 30 | 65  | 52  | 40  | 48  | 57  | 59  |
| SMMPA06206 | 22 | 21 | 15 | 29  | 23  | 26  | 25  | 31  | 34  |
| SMMPA06207 | 21 | 24 | 28 | 33  | 27  | 21  | 27  | 36  | 25  |
| SMMPA06208 | 6  | 4  | 5  | 36  | 54  | 36  | 17  | 26  | 21  |
| SMMPA06209 | 19 | 18 | 10 | 18  | 15  | 23  | 22  | 16  | 22  |
| SMMPA06210 | 23 | 19 | 12 | 41  | 25  | 29  | 16  | 35  | 25  |
| SMMPA06211 | 25 | 33 | 18 | 41  | 41  | 50  | 26  | 31  | 34  |
| SMMPA06212 | 18 | 18 | 15 | 45  | 33  | 38  | 32  | 29  | 38  |
| SMMPA06213 | 32 | 19 | 20 | 72  | 66  | 49  | 45  | 63  | 53  |
| SMMPA06214 | 17 | 31 | 16 | 46  | 37  | 24  | 40  | 39  | 31  |
| SMMPA06215 | 22 | 21 | 20 | 42  | 34  | 29  | 30  | 35  | 35  |
| SMMPA06216 | 40 | 47 | 25 | 24  | 18  | 22  | 17  | 35  | 21  |
| SMMPA06217 | 19 | 33 | 21 | 69  | 75  | 50  | 28  | 48  | 37  |
| SMMPA06218 | 12 | 32 | 8  | 49  | 46  | 44  | 23  | 38  | 32  |
| SMMPA06219 | 21 | 21 | 14 | 14  | 23  | 18  | 24  | 25  | 20  |
| SMMPA06220 | 13 | 14 | 9  | 27  | 18  | 24  | 10  | 20  | 21  |
| SMMPA06221 | 13 | 13 | 13 | 15  | 16  | 16  | 25  | 21  | 26  |
| SMMPA06222 | 12 | 25 | 24 | 139 | 145 | 90  | 54  | 103 | 79  |
| SMMPA06223 | 17 | 23 | 29 | 54  | 54  | 44  | 29  | 49  | 43  |
| SMMPA06224 | 17 | 16 | 22 | 32  | 22  | 32  | 36  | 33  | 37  |
| SMMPA06225 | 44 | 51 | 33 | 226 | 207 | 166 | 131 | 145 | 153 |
| SMMPA06226 | 21 | 29 | 21 | 94  | 72  | 51  | 44  | 61  | 53  |
| SMMPA06227 | 18 | 19 | 19 | 48  | 41  | 37  | 40  | 41  | 34  |
| SMMPA06228 | 19 | 27 | 23 | 77  | 80  | 57  | 37  | 43  | 43  |
| SMMPA06229 | 14 | 20 | 19 | 28  | 21  | 23  | 13  | 19  | 30  |
| SMMPA06230 | 16 | 17 | 13 | 25  | 27  | 19  | 19  | 31  | 23  |
| SMMPA06231 | 15 | 23 | 13 | 18  | 20  | 18  | 13  | 39  | 30  |
| SMMPA06232 | 15 | 14 | 10 | 25  | 24  | 15  | 20  | 42  | 32  |
| SMMPA06233 | 46 | 36 | 37 | 47  | 38  | 54  | 51  | 49  | 53  |
| SMMPA06234 | 5  | 17 | 11 | 69  | 53  | 43  | 33  | 52  | 29  |
| SMMPA06235 | 35 | 34 | 24 | 64  | 64  | 46  | 52  | 55  | 71  |

|            |    |    |    |     |     |     |     |     |     |
|------------|----|----|----|-----|-----|-----|-----|-----|-----|
| SMMPA06236 | 24 | 18 | 20 | 43  | 36  | 29  | 25  | 42  | 33  |
| SMMPA06237 | 13 | 12 | 17 | 125 | 130 | 102 | 56  | 83  | 48  |
| SMMPA06238 | 22 | 25 | 29 | 42  | 28  | 28  | 25  | 36  | 34  |
| SMMPA06239 | 6  | 9  | 8  | 5   | 6   | 9   | 3   | 6   | 8   |
| SMMPA06240 | 26 | 17 | 25 | 20  | 28  | 20  | 23  | 24  | 37  |
| SMMPA06241 | 20 | 27 | 14 | 32  | 28  | 33  | 16  | 20  | 21  |
| SMMPA06242 | 37 | 28 | 39 | 40  | 40  | 50  | 36  | 55  | 44  |
| SMMPA06243 | 18 | 19 | 22 | 86  | 60  | 58  | 45  | 60  | 47  |
| SMMPA06244 | 3  | 4  | 8  | 18  | 10  | 15  | 10  | 9   | 14  |
| SMMPA06245 | 18 | 4  | 4  | 29  | 39  | 32  | 14  | 25  | 22  |
| SMMPA06246 | 18 | 22 | 24 | 24  | 40  | 33  | 35  | 37  | 34  |
| SMMPA06247 | 41 | 26 | 20 | 39  | 42  | 44  | 29  | 35  | 39  |
| SMMPA06248 | 9  | 18 | 14 | 26  | 34  | 9   | 11  | 19  | 27  |
| SMMPA06249 | 36 | 45 | 15 | 69  | 74  | 67  | 46  | 50  | 52  |
| SMMPA06250 | 28 | 30 | 32 | 220 | 221 | 175 | 91  | 117 | 111 |
| SMMPA06251 | 20 | 24 | 16 | 260 | 207 | 174 | 97  | 110 | 105 |
| SMMPA06252 | 15 | 10 | 16 | 167 | 151 | 127 | 89  | 94  | 76  |
| SMMPA06253 | 26 | 32 | 22 | 243 | 222 | 151 | 152 | 173 | 165 |
| SMMPA06254 | 22 | 12 | 19 | 56  | 43  | 39  | 30  | 52  | 44  |
| SMMPA06255 | 26 | 20 | 31 | 301 | 284 | 245 | 150 | 179 | 164 |
| SMMPA06256 | 17 | 26 | 27 | 250 | 262 | 178 | 87  | 126 | 108 |
| SMMPA06257 | 26 | 25 | 25 | 262 | 231 | 180 | 87  | 124 | 121 |
| SMMPA06258 | 18 | 19 | 21 | 109 | 94  | 89  | 63  | 75  | 74  |
| SMMPA06259 | 26 | 45 | 26 | 38  | 36  | 26  | 30  | 38  | 35  |
| SMMPA06260 | 13 | 10 | 12 | 37  | 26  | 25  | 12  | 27  | 27  |
| SMMPA06261 | 74 | 80 | 88 | 34  | 33  | 41  | 56  | 62  | 55  |
| SMMPA06262 | 28 | 31 | 23 | 82  | 72  | 44  | 54  | 60  | 47  |
| SMMPA06263 | 20 | 15 | 18 | 184 | 184 | 132 | 80  | 99  | 81  |
| SMMPA06264 | 19 | 22 | 18 | 76  | 57  | 56  | 44  | 53  | 53  |
| SMMPA06265 | 27 | 28 | 19 | 40  | 31  | 39  | 22  | 36  | 30  |
| SMMPA06266 | 21 | 25 | 21 | 65  | 49  | 42  | 15  | 30  | 34  |
| SMMPA06267 | 7  | 22 | 12 | 56  | 53  | 51  | 26  | 34  | 18  |
| SMMPA06268 | 13 | 15 | 17 | 41  | 31  | 36  | 10  | 32  | 16  |
| SMMPA06269 | 24 | 20 | 22 | 236 | 195 | 166 | 50  | 96  | 77  |
| SMMPA06270 | 28 | 35 | 28 | 95  | 80  | 63  | 52  | 64  | 50  |
| SMMPA06271 | 17 | 15 | 22 | 55  | 41  | 44  | 17  | 36  | 34  |
| SMMPA06272 | 22 | 20 | 17 | 51  | 37  | 24  | 33  | 51  | 47  |
| SMMPA06273 | 21 | 29 | 31 | 28  | 16  | 13  | 21  | 31  | 42  |
| SMMPA06274 | 18 | 21 | 13 | 40  | 15  | 30  | 29  | 32  | 39  |
| SMMPA06275 | 26 | 18 | 24 | 28  | 23  | 15  | 20  | 28  | 35  |
| SMMPA06276 | 43 | 35 | 31 | 127 | 111 | 100 | 63  | 87  | 76  |

|            |    |    |    |     |     |     |     |     |     |
|------------|----|----|----|-----|-----|-----|-----|-----|-----|
| SMMPA06277 | 23 | 18 | 19 | 23  | 19  | 29  | 32  | 36  | 33  |
| SMMPA06278 | 26 | 25 | 23 | 56  | 49  | 46  | 35  | 51  | 58  |
| SMMPA06279 | 24 | 21 | 15 | 42  | 36  | 36  | 23  | 34  | 29  |
| SMMPA06280 | 7  | 9  | 7  | 26  | 28  | 28  | 4   | 16  | 10  |
| SMMPA06281 | 10 | 10 | 4  | 17  | 9   | 14  | 8   | 18  | 12  |
| SMMPA06282 | 19 | 16 | 13 | 38  | 31  | 27  | 9   | 28  | 15  |
| SMMPA06283 | 35 | 25 | 23 | 27  | 23  | 25  | 27  | 37  | 30  |
| SMMPA06284 | 10 | 3  | 9  | 13  | 12  | 11  | 9   | 8   | 14  |
| SMMPA06285 | 15 | 13 | 18 | 90  | 72  | 61  | 32  | 45  | 38  |
| SMMPA06286 | 33 | 44 | 28 | 23  | 21  | 17  | 32  | 30  | 39  |
| SMMPA06287 | 16 | 19 | 18 | 246 | 233 | 167 | 88  | 107 | 111 |
| SMMPA06288 | 47 | 61 | 39 | 55  | 44  | 59  | 49  | 58  | 61  |
| SMMPA06289 | 18 | 25 | 20 | 32  | 29  | 26  | 54  | 42  | 87  |
| SMMPA06290 | 9  | 15 | 25 | 32  | 19  | 19  | 23  | 28  | 19  |
| SMMPA06291 | 26 | 28 | 18 | 24  | 32  | 28  | 18  | 43  | 26  |
| SMMPA06292 | 11 | 15 | 16 | 24  | 22  | 18  | 21  | 30  | 30  |
| SMMPA06293 | 19 | 23 | 19 | 45  | 32  | 31  | 37  | 48  | 42  |
| SMMPA06294 | 22 | 16 | 24 | 93  | 108 | 76  | 61  | 92  | 75  |
| SMMPA06295 | 24 | 38 | 26 | 60  | 42  | 41  | 36  | 41  | 48  |
| SMMPA06296 | 8  | 9  | 8  | 15  | 17  | 11  | 11  | 13  | 18  |
| SMMPA06297 | 14 | 18 | 17 | 49  | 57  | 38  | 24  | 35  | 31  |
| SMMPA06298 | 8  | 13 | 9  | 28  | 22  | 18  | 22  | 29  | 41  |
| SMMPA06299 | 19 | 23 | 17 | 15  | 28  | 26  | 26  | 28  | 31  |
| SMMPA06300 | 22 | 22 | 26 | 26  | 27  | 23  | 34  | 35  | 41  |
| SMMPA06301 | 18 | 11 | 17 | 22  | 20  | 18  | 24  | 31  | 45  |
| SMMPA06302 | 25 | 18 | 18 | 39  | 53  | 51  | 53  | 75  | 77  |
| SMMPA06303 | 10 | 17 | 12 | 12  | 16  | 23  | 19  | 24  | 17  |
| SMMPA06304 | 22 | 25 | 14 | 39  | 35  | 28  | 31  | 44  | 39  |
| SMMPA06305 | 35 | 36 | 36 | 110 | 102 | 83  | 79  | 84  | 91  |
| SMMPA06306 | 38 | 36 | 31 | 158 | 151 | 115 | 98  | 123 | 113 |
| SMMPA06307 | 23 | 22 | 17 | 280 | 248 | 240 | 136 | 144 | 141 |
| SMMPA06308 | 8  | 11 | 13 | 95  | 82  | 90  | 53  | 52  | 51  |
| SMMPA06309 | 21 | 15 | 16 | 18  | 35  | 26  | 22  | 34  | 34  |
| SMMPA06310 | 31 | 24 | 28 | 30  | 32  | 23  | 36  | 45  | 45  |
| SMMPA06311 | 29 | 27 | 18 | 45  | 53  | 34  | 47  | 37  | 51  |
| SMMPA06312 | 18 | 27 | 24 | 40  | 29  | 34  | 22  | 40  | 37  |
| SMMPA06313 | 17 | 20 | 13 | 128 | 113 | 84  | 71  | 79  | 94  |
| SMMPA06314 | 14 | 22 | 15 | 170 | 173 | 147 | 102 | 135 | 134 |
| SMMPA06315 | 19 | 22 | 18 | 45  | 47  | 32  | 42  | 39  | 52  |
| SMMPA06316 | 18 | 23 | 23 | 38  | 37  | 41  | 24  | 33  | 31  |
| SMMPA06317 | 12 | 1  | 2  | 5   | 1   | 6   | 3   | 8   | 8   |

|            |    |    |    |     |     |     |     |     |     |
|------------|----|----|----|-----|-----|-----|-----|-----|-----|
| SMMPA06318 | 22 | 16 | 18 | 40  | 40  | 28  | 22  | 35  | 39  |
| SMMPA06319 | 12 | 15 | 12 | 20  | 25  | 21  | 17  | 21  | 17  |
| SMMPA06320 | 6  | 3  | 9  | 10  | 13  | 10  | 14  | 4   | 9   |
| SMMPA06321 | 31 | 30 | 26 | 47  | 38  | 43  | 49  | 45  | 61  |
| SMMPA06322 | 10 | 8  | 10 | 17  | 13  | 9   | 12  | 34  | 20  |
| SMMPA06323 | 12 | 17 | 16 | 38  | 31  | 35  | 19  | 36  | 42  |
| SMMPA06324 | 18 | 9  | 8  | 36  | 33  | 33  | 12  | 16  | 28  |
| SMMPA06325 | 11 | 17 | 17 | 53  | 40  | 45  | 30  | 36  | 43  |
| SMMPA06326 | 36 | 36 | 30 | 61  | 60  | 46  | 31  | 62  | 61  |
| SMMPA06327 | 10 | 6  | 4  | 69  | 50  | 53  | 18  | 19  | 32  |
| SMMPA06328 | 24 | 15 | 21 | 18  | 21  | 13  | 18  | 29  | 34  |
| SMMPA06329 | 21 | 13 | 17 | 55  | 57  | 47  | 23  | 27  | 30  |
| SMMPA06330 | 9  | 8  | 10 | 11  | 15  | 11  | 8   | 16  | 10  |
| SMMPA06331 | 9  | 18 | 15 | 89  | 61  | 55  | 37  | 52  | 47  |
| SMMPA06332 | 34 | 30 | 26 | 474 | 489 | 350 | 121 | 166 | 169 |
| SMMPA06333 | 21 | 18 | 16 | 192 | 135 | 119 | 76  | 121 | 83  |
| SMMPA06334 | 12 | 22 | 24 | 246 | 210 | 190 | 102 | 131 | 132 |
| SMMPA06335 | 12 | 21 | 14 | 217 | 208 | 150 | 72  | 98  | 91  |
| SMMPA06336 | 11 | 15 | 15 | 106 | 76  | 64  | 39  | 54  | 66  |
| SMMPA06337 | 33 | 28 | 36 | 86  | 82  | 78  | 48  | 80  | 71  |
| SMMPA06338 | 26 | 15 | 16 | 197 | 138 | 106 | 78  | 94  | 76  |
| SMMPA06339 | 26 | 44 | 24 | 37  | 39  | 34  | 59  | 45  | 59  |
| SMMPA06340 | 28 | 28 | 20 | 213 | 162 | 124 | 64  | 95  | 105 |
| SMMPA06341 | 14 | 5  | 11 | 21  | 26  | 28  | 18  | 22  | 16  |
| SMMPA06342 | 58 | 56 | 37 | 21  | 32  | 34  | 36  | 51  | 42  |
| SMMPA06343 | 30 | 28 | 30 | 109 | 91  | 71  | 55  | 77  | 65  |
| SMMPA06344 | 19 | 28 | 25 | 365 | 339 | 283 | 175 | 264 | 249 |
| SMMPA06345 | 17 | 7  | 7  | 52  | 34  | 30  | 25  | 41  | 32  |
| SMMPA06346 | 8  | 12 | 3  | 38  | 28  | 21  | 17  | 27  | 24  |
| SMMPA06347 | 28 | 24 | 20 | 138 | 89  | 66  | 60  | 83  | 80  |
| SMMPA06348 | 24 | 38 | 26 | 87  | 85  | 72  | 49  | 69  | 62  |
| SMMPA06349 | 29 | 27 | 31 | 334 | 327 | 296 | 156 | 197 | 167 |
| SMMPA06350 | 27 | 23 | 21 | 127 | 92  | 83  | 47  | 55  | 40  |
| SMMPA06351 | 33 | 20 | 21 | 96  | 74  | 81  | 49  | 74  | 68  |
| SMMPA06352 | 19 | 16 | 16 | 76  | 63  | 44  | 32  | 68  | 71  |
| SMMPA06353 | 17 | 6  | 9  | 117 | 100 | 76  | 64  | 79  | 61  |
| SMMPA06354 | 2  | 0  | 3  | 8   | 8   | 6   | 7   | 6   | 3   |
| SMMPA06355 | 24 | 26 | 16 | 91  | 105 | 82  | 27  | 47  | 44  |
| SMMPA06356 | 12 | 2  | 12 | 12  | 17  | 14  | 6   | 15  | 24  |
| SMMPA06357 | 32 | 20 | 8  | 12  | 21  | 17  | 26  | 26  | 30  |
| SMMPA06358 | 21 | 14 | 18 | 15  | 20  | 19  | 16  | 27  | 25  |

|            |    |    |    |     |     |     |    |     |     |
|------------|----|----|----|-----|-----|-----|----|-----|-----|
| SMMPA06359 | 15 | 23 | 21 | 43  | 19  | 26  | 33 | 41  | 45  |
| SMMPA06360 | 21 | 32 | 30 | 160 | 125 | 112 | 82 | 95  | 101 |
| SMMPA06361 | 23 | 15 | 25 | 45  | 46  | 46  | 33 | 34  | 31  |
| SMMPA06362 | 37 | 33 | 36 | 36  | 30  | 40  | 48 | 78  | 67  |
| SMMPA06363 | 31 | 23 | 17 | 46  | 24  | 16  | 31 | 39  | 39  |
| SMMPA06364 | 45 | 48 | 45 | 100 | 92  | 78  | 61 | 78  | 63  |
| SMMPA06365 | 15 | 14 | 16 | 8   | 14  | 15  | 21 | 20  | 26  |
| SMMPA06366 | 40 | 34 | 33 | 84  | 75  | 52  | 51 | 66  | 66  |
| SMMPA06367 | 10 | 20 | 14 | 14  | 17  | 19  | 19 | 23  | 22  |
| SMMPA06368 | 12 | 15 | 21 | 23  | 30  | 29  | 15 | 46  | 25  |
| SMMPA06369 | 9  | 19 | 12 | 19  | 28  | 16  | 26 | 24  | 27  |
| SMMPA06370 | 87 | 83 | 73 | 49  | 46  | 54  | 63 | 91  | 85  |
| SMMPA06371 | 20 | 24 | 21 | 20  | 13  | 18  | 23 | 12  | 20  |
| SMMPA06372 | 12 | 11 | 11 | 25  | 30  | 20  | 17 | 33  | 19  |
| SMMPA06373 | 12 | 24 | 17 | 14  | 18  | 14  | 20 | 21  | 22  |
| SMMPA06374 | 11 | 18 | 6  | 194 | 194 | 121 | 86 | 101 | 85  |
| SMMPA06375 | 16 | 14 | 16 | 73  | 69  | 67  | 59 | 72  | 53  |
| SMMPA06376 | 16 | 16 | 15 | 48  | 42  | 46  | 27 | 27  | 27  |
| SMMPA06377 | 18 | 14 | 12 | 80  | 61  | 50  | 33 | 43  | 56  |
| SMMPA06378 | 8  | 9  | 8  | 26  | 23  | 21  | 7  | 10  | 20  |
| SMMPA06379 | 21 | 25 | 22 | 71  | 73  | 40  | 23 | 43  | 31  |
| SMMPA06380 | 24 | 22 | 28 | 74  | 73  | 41  | 52 | 62  | 55  |
| SMMPA06381 | 20 | 17 | 21 | 53  | 64  | 52  | 38 | 46  | 49  |
| SMMPA06382 | 5  | 22 | 18 | 35  | 45  | 33  | 21 | 30  | 26  |
| SMMPA06383 | 13 | 15 | 18 | 42  | 33  | 33  | 28 | 37  | 19  |
| SMMPA06384 | 35 | 31 | 26 | 83  | 65  | 61  | 60 | 76  | 74  |
| SMMPA06385 | 26 | 24 | 14 | 104 | 87  | 82  | 41 | 77  | 48  |
| SMMPA06386 | 26 | 29 | 18 | 49  | 35  | 34  | 38 | 32  | 47  |
| SMMPA06387 | 18 | 24 | 21 | 50  | 49  | 37  | 29 | 50  | 43  |
| SMMPA06388 | 9  | 8  | 7  | 22  | 14  | 18  | 15 | 21  | 14  |
| SMMPA06389 | 25 | 19 | 24 | 75  | 76  | 59  | 59 | 86  | 84  |
| SMMPA06390 | 5  | 2  | 7  | 0   | 2   | 1   | 2  | 5   | 5   |
| SMMPA06391 | 7  | 9  | 11 | 10  | 15  | 8   | 11 | 18  | 12  |
| SMMPA06392 | 14 | 11 | 12 | 16  | 14  | 18  | 25 | 21  | 26  |
| SMMPA06393 | 22 | 20 | 10 | 32  | 36  | 26  | 36 | 33  | 35  |
| SMMPA06394 | 17 | 13 | 18 | 40  | 35  | 34  | 24 | 33  | 24  |
| SMMPA06395 | 17 | 9  | 7  | 11  | 16  | 8   | 8  | 14  | 10  |
| SMMPA06396 | 2  | 5  | 1  | 3   | 4   | 5   | 1  | 4   | 3   |
| SMMPA06397 | 24 | 29 | 15 | 46  | 39  | 30  | 25 | 31  | 37  |
| SMMPA06398 | 29 | 20 | 20 | 62  | 36  | 39  | 29 | 28  | 34  |
| SMMPA06399 | 16 | 17 | 13 | 33  | 24  | 17  | 13 | 20  | 18  |

|            |     |     |    |     |     |     |     |     |     |
|------------|-----|-----|----|-----|-----|-----|-----|-----|-----|
| SMMPA06400 | 13  | 11  | 11 | 22  | 22  | 17  | 7   | 12  | 15  |
| SMMPA06401 | 14  | 11  | 7  | 29  | 25  | 17  | 17  | 24  | 27  |
| SMMPA06402 | 13  | 20  | 21 | 37  | 41  | 39  | 29  | 41  | 38  |
| SMMPA06403 | 16  | 28  | 24 | 34  | 34  | 35  | 27  | 38  | 30  |
| SMMPA06404 | 15  | 8   | 11 | 53  | 68  | 32  | 25  | 32  | 32  |
| SMMPA06405 | 29  | 21  | 17 | 505 | 481 | 418 | 287 | 434 | 326 |
| SMMPA06406 | 27  | 28  | 24 | 105 | 104 | 73  | 57  | 69  | 77  |
| SMMPA06407 | 32  | 36  | 35 | 179 | 181 | 92  | 73  | 117 | 92  |
| SMMPA06408 | 25  | 16  | 19 | 299 | 301 | 221 | 112 | 155 | 141 |
| SMMPA06409 | 31  | 28  | 14 | 94  | 90  | 52  | 32  | 54  | 62  |
| SMMPA06410 | 18  | 20  | 22 | 168 | 140 | 102 | 58  | 67  | 57  |
| SMMPA06411 | 16  | 23  | 19 | 74  | 64  | 49  | 23  | 34  | 35  |
| SMMPA06412 | 24  | 17  | 18 | 99  | 84  | 57  | 48  | 64  | 71  |
| SMMPA06413 | 21  | 27  | 23 | 207 | 163 | 124 | 70  | 112 | 80  |
| SMMPA06414 | 15  | 13  | 15 | 81  | 85  | 65  | 43  | 52  | 47  |
| SMMPA06415 | 21  | 23  | 29 | 241 | 197 | 149 | 59  | 89  | 71  |
| SMMPA06416 | 30  | 27  | 29 | 84  | 80  | 51  | 61  | 64  | 59  |
| SMMPA06417 | 22  | 15  | 17 | 151 | 135 | 116 | 62  | 79  | 70  |
| SMMPA06418 | 3   | 2   | 3  | 7   | 10  | 6   | 2   | 7   | 12  |
| SMMPA06419 | 5   | 10  | 8  | 11  | 8   | 8   | 11  | 16  | 13  |
| SMMPA06420 | 11  | 7   | 9  | 11  | 19  | 12  | 18  | 12  | 13  |
| SMMPA06421 | 1   | 2   | 3  | 7   | 4   | 1   | 1   | 6   | 5   |
| SMMPA06422 | 12  | 25  | 16 | 20  | 19  | 19  | 15  | 30  | 29  |
| SMMPA06423 | 24  | 25  | 13 | 90  | 76  | 55  | 47  | 75  | 67  |
| SMMPA06424 | 27  | 26  | 15 | 57  | 37  | 51  | 51  | 47  | 48  |
| SMMPA06425 | 12  | 13  | 16 | 95  | 93  | 57  | 39  | 59  | 42  |
| SMMPA06426 | 32  | 21  | 20 | 661 | 554 | 471 | 277 | 383 | 377 |
| SMMPA06427 | 103 | 102 | 83 | 87  | 85  | 83  | 96  | 126 | 109 |
| SMMPA06428 | 6   | 10  | 8  | 25  | 20  | 20  | 30  | 34  | 31  |
| SMMPA06429 | 6   | 10  | 11 | 22  | 32  | 24  | 30  | 39  | 33  |
| SMMPA06430 | 18  | 27  | 21 | 36  | 30  | 31  | 23  | 49  | 28  |
| SMMPA06431 | 23  | 14  | 32 | 22  | 24  | 24  | 33  | 45  | 32  |
| SMMPA06432 | 23  | 24  | 14 | 50  | 43  | 38  | 25  | 48  | 48  |
| SMMPA06433 | 3   | 2   | 5  | 7   | 4   | 8   | 8   | 9   | 16  |
| SMMPA06434 | 13  | 10  | 10 | 20  | 20  | 19  | 19  | 24  | 24  |
| SMMPA06435 | 22  | 14  | 12 | 28  | 27  | 27  | 40  | 54  | 52  |
| SMMPA06436 | 31  | 31  | 21 | 84  | 80  | 63  | 51  | 69  | 51  |
| SMMPA06437 | 15  | 10  | 15 | 78  | 65  | 64  | 39  | 52  | 38  |
| SMMPA06438 | 10  | 4   | 11 | 110 | 111 | 86  | 65  | 76  | 55  |
| SMMPA06439 | 23  | 17  | 24 | 79  | 63  | 76  | 54  | 56  | 59  |
| SMMPA06440 | 43  | 38  | 45 | 158 | 130 | 93  | 94  | 87  | 106 |

|            |    |    |    |     |     |     |     |     |     |
|------------|----|----|----|-----|-----|-----|-----|-----|-----|
| SMMPA06441 | 39 | 37 | 36 | 211 | 209 | 145 | 128 | 158 | 134 |
| SMMPA06442 | 23 | 23 | 15 | 114 | 114 | 76  | 54  | 79  | 65  |
| SMMPA06443 | 13 | 20 | 16 | 142 | 123 | 93  | 55  | 59  | 61  |
| SMMPA06444 | 39 | 38 | 30 | 217 | 204 | 138 | 115 | 134 | 118 |
| SMMPA06445 | 16 | 12 | 7  | 79  | 75  | 60  | 34  | 49  | 48  |
| SMMPA06446 | 12 | 22 | 17 | 43  | 28  | 35  | 17  | 27  | 24  |
| SMMPA06447 | 11 | 8  | 13 | 50  | 47  | 29  | 20  | 29  | 31  |
| SMMPA06448 | 5  | 5  | 7  | 29  | 26  | 22  | 8   | 14  | 12  |
| SMMPA06449 | 16 | 14 | 14 | 3   | 9   | 8   | 9   | 15  | 17  |
| SMMPA06450 | 11 | 14 | 11 | 18  | 26  | 17  | 17  | 28  | 15  |
| SMMPA06451 | 28 | 17 | 21 | 29  | 23  | 26  | 26  | 31  | 32  |
| SMMPA06452 | 15 | 20 | 20 | 43  | 43  | 40  | 19  | 32  | 31  |
| SMMPA06453 | 6  | 3  | 4  | 23  | 19  | 12  | 7   | 18  | 14  |
| SMMPA06454 | 28 | 15 | 8  | 23  | 12  | 16  | 25  | 26  | 24  |
| SMMPA06455 | 17 | 22 | 15 | 49  | 48  | 41  | 32  | 39  | 55  |
| SMMPA06456 | 10 | 14 | 8  | 36  | 31  | 32  | 17  | 21  | 20  |
| SMMPA06457 | 12 | 10 | 8  | 8   | 6   | 6   | 5   | 9   | 6   |
| SMMPA06458 | 13 | 17 | 17 | 112 | 104 | 73  | 84  | 120 | 101 |
| SMMPA06459 | 10 | 11 | 15 | 28  | 36  | 24  | 23  | 32  | 26  |
| SMMPA06460 | 30 | 38 | 26 | 171 | 175 | 133 | 108 | 96  | 99  |
| SMMPA06461 | 18 | 15 | 15 | 19  | 15  | 15  | 14  | 15  | 20  |
| SMMPA06462 | 17 | 20 | 17 | 28  | 17  | 28  | 33  | 38  | 22  |
| SMMPA06463 | 18 | 11 | 9  | 90  | 67  | 56  | 57  | 54  | 59  |
| SMMPA06464 | 18 | 16 | 16 | 29  | 15  | 17  | 16  | 35  | 37  |
| SMMPA06465 | 15 | 13 | 11 | 16  | 13  | 17  | 20  | 35  | 23  |
| SMMPA06466 | 48 | 52 | 49 | 50  | 46  | 40  | 44  | 54  | 43  |
| SMMPA06467 | 35 | 50 | 50 | 38  | 34  | 32  | 26  | 53  | 49  |
| SMMPA06468 | 36 | 34 | 19 | 136 | 111 | 106 | 59  | 75  | 74  |
| SMMPA06469 | 48 | 47 | 34 | 64  | 58  | 42  | 47  | 91  | 86  |
| SMMPA06470 | 30 | 16 | 12 | 28  | 21  | 29  | 18  | 28  | 29  |
| SMMPA06471 | 45 | 46 | 46 | 70  | 63  | 40  | 59  | 60  | 59  |
| SMMPA06472 | 32 | 29 | 21 | 302 | 271 | 224 | 173 | 231 | 229 |
| SMMPA06473 | 25 | 32 | 28 | 80  | 64  | 56  | 53  | 57  | 49  |
| SMMPA06474 | 34 | 27 | 25 | 320 | 323 | 294 | 177 | 233 | 199 |
| SMMPA06475 | 30 | 21 | 15 | 187 | 164 | 131 | 78  | 97  | 91  |
| SMMPA06476 | 46 | 32 | 31 | 150 | 173 | 128 | 108 | 144 | 116 |
| SMMPA06477 | 24 | 39 | 19 | 306 | 298 | 245 | 210 | 302 | 252 |
| SMMPA06478 | 14 | 27 | 17 | 185 | 171 | 137 | 107 | 101 | 124 |
| SMMPA06479 | 27 | 29 | 27 | 269 | 237 | 194 | 148 | 243 | 190 |
| SMMPA06480 | 14 | 15 | 11 | 44  | 49  | 49  | 23  | 52  | 39  |
| SMMPA06481 | 8  | 9  | 5  | 112 | 101 | 84  | 52  | 70  | 76  |

|            |    |    |    |     |     |     |     |     |     |
|------------|----|----|----|-----|-----|-----|-----|-----|-----|
| SMMPA06482 | 27 | 23 | 34 | 52  | 29  | 28  | 31  | 40  | 47  |
| SMMPA06483 | 19 | 28 | 10 | 31  | 35  | 22  | 26  | 37  | 32  |
| SMMPA06484 | 17 | 22 | 24 | 31  | 30  | 26  | 32  | 31  | 45  |
| SMMPA06485 | 21 | 25 | 13 | 49  | 35  | 44  | 16  | 38  | 34  |
| SMMPA06486 | 5  | 3  | 9  | 42  | 39  | 35  | 12  | 20  | 15  |
| SMMPA06487 | 17 | 15 | 18 | 52  | 40  | 41  | 42  | 45  | 45  |
| SMMPA06488 | 25 | 25 | 20 | 70  | 65  | 66  | 35  | 64  | 52  |
| SMMPA06489 | 30 | 34 | 29 | 64  | 62  | 60  | 45  | 55  | 59  |
| SMMPA06490 | 25 | 26 | 19 | 61  | 57  | 38  | 28  | 54  | 37  |
| SMMPA06491 | 25 | 31 | 31 | 125 | 107 | 95  | 53  | 66  | 58  |
| SMMPA06492 | 16 | 19 | 11 | 53  | 34  | 27  | 29  | 30  | 25  |
| SMMPA06493 | 50 | 53 | 37 | 198 | 206 | 137 | 100 | 128 | 120 |
| SMMPA06494 | 55 | 58 | 43 | 70  | 65  | 49  | 57  | 64  | 72  |
| SMMPA06495 | 10 | 7  | 3  | 23  | 32  | 20  | 18  | 24  | 17  |
| SMMPA06496 | 1  | 1  | 4  | 0   | 1   | 1   | 3   | 0   | 2   |
| SMMPA06497 | 26 | 19 | 19 | 362 | 299 | 227 | 211 | 280 | 256 |
| SMMPA06498 | 32 | 29 | 31 | 302 | 256 | 190 | 220 | 292 | 281 |
| SMMPA06499 | 15 | 18 | 15 | 310 | 285 | 229 | 161 | 224 | 226 |
| SMMPA06500 | 53 | 43 | 37 | 420 | 315 | 236 | 232 | 314 | 283 |
| SMMPA06501 | 22 | 34 | 22 | 653 | 502 | 440 | 356 | 409 | 402 |
| SMMPA06502 | 33 | 31 | 26 | 417 | 309 | 236 | 282 | 340 | 345 |
| SMMPA06503 | 17 | 17 | 13 | 22  | 19  | 14  | 16  | 25  | 27  |
| SMMPA06504 | 17 | 15 | 8  | 16  | 13  | 21  | 15  | 22  | 16  |
| SMMPA06505 | 19 | 24 | 23 | 45  | 40  | 44  | 24  | 28  | 27  |
| SMMPA06506 | 23 | 26 | 18 | 334 | 348 | 294 | 139 | 188 | 135 |
| SMMPA06507 | 21 | 18 | 15 | 198 | 204 | 117 | 64  | 65  | 78  |
| SMMPA06508 | 34 | 31 | 28 | 65  | 61  | 61  | 48  | 40  | 43  |
| SMMPA06509 | 19 | 18 | 13 | 41  | 30  | 38  | 34  | 37  | 33  |
| SMMPA06510 | 5  | 5  | 6  | 77  | 91  | 61  | 45  | 51  | 40  |
| SMMPA06511 | 7  | 17 | 8  | 168 | 148 | 121 | 103 | 122 | 109 |
| SMMPA06512 | 20 | 23 | 17 | 872 | 814 | 733 | 324 | 461 | 410 |
| SMMPA06513 | 4  | 5  | 4  | 4   | 9   | 5   | 4   | 12  | 10  |
| SMMPA06514 | 16 | 25 | 24 | 12  | 16  | 19  | 24  | 20  | 16  |
| SMMPA06515 | 16 | 12 | 16 | 23  | 25  | 10  | 13  | 9   | 19  |
| SMMPA06516 | 21 | 17 | 14 | 17  | 16  | 12  | 20  | 22  | 26  |
| SMMPA06517 | 18 | 21 | 11 | 26  | 23  | 23  | 26  | 26  | 23  |
| SMMPA06518 | 19 | 34 | 21 | 60  | 83  | 53  | 43  | 57  | 47  |
| SMMPA06519 | 14 | 10 | 17 | 48  | 45  | 45  | 27  | 38  | 25  |
| SMMPA06520 | 7  | 9  | 10 | 17  | 25  | 13  | 7   | 11  | 17  |
| SMMPA06521 | 12 | 23 | 10 | 46  | 50  | 35  | 44  | 52  | 51  |
| SMMPA06522 | 13 | 13 | 13 | 24  | 29  | 18  | 8   | 22  | 14  |



|            |    |    |    |     |     |     |     |     |     |
|------------|----|----|----|-----|-----|-----|-----|-----|-----|
| SMMPA06523 | 20 | 11 | 10 | 36  | 20  | 30  | 15  | 28  | 24  |
| SMMPA06524 | 4  | 7  | 7  | 14  | 6   | 7   | 7   | 9   | 19  |
| SMMPA06525 | 19 | 16 | 20 | 35  | 31  | 24  | 41  | 35  | 38  |
| SMMPA06526 | 26 | 24 | 24 | 26  | 27  | 19  | 26  | 58  | 45  |
| SMMPA06527 | 39 | 36 | 34 | 32  | 38  | 18  | 32  | 32  | 38  |
| SMMPA06528 | 42 | 54 | 32 | 53  | 45  | 44  | 65  | 84  | 71  |
| SMMPA06529 | 16 | 15 | 14 | 41  | 30  | 23  | 13  | 37  | 15  |
| SMMPA06530 | 37 | 46 | 36 | 435 | 439 | 283 | 125 | 186 | 152 |
| SMMPA06531 | 14 | 17 | 8  | 265 | 287 | 199 | 132 | 177 | 142 |
| SMMPA06532 | 36 | 34 | 31 | 428 | 452 | 326 | 143 | 190 | 187 |
| SMMPA06533 | 23 | 20 | 20 | 443 | 421 | 354 | 210 | 283 | 254 |
| SMMPA06534 | 2  | 8  | 2  | 6   | 10  | 7   | 7   | 10  | 8   |
| SMMPA06535 | 10 | 9  | 7  | 8   | 10  | 7   | 4   | 10  | 10  |
| SMMPA06536 | 1  | 3  | 3  | 3   | 0   | 1   | 2   | 4   | 1   |
| SMMPA06537 | 1  | 3  | 3  | 4   | 9   | 5   | 2   | 1   | 8   |
| SMMPA06538 | 4  | 1  | 3  | 3   | 4   | 3   | 1   | 2   | 2   |
| SMMPA06539 | 9  | 4  | 3  | 13  | 6   | 6   | 6   | 9   | 12  |
| SMMPA06540 | 8  | 5  | 7  | 4   | 1   | 7   | 7   | 9   | 12  |
| SMMPA06541 | 0  | 2  | 0  | 0   | 1   | 0   | 0   | 1   | 2   |
| SMMPA06542 | 4  | 5  | 3  | 3   | 8   | 8   | 10  | 10  | 12  |
| SMMPA06543 | 5  | 4  | 2  | 30  | 36  | 27  | 10  | 12  | 16  |
| SMMPA06544 | 24 | 19 | 24 | 169 | 143 | 98  | 73  | 90  | 92  |
| SMMPA06545 | 14 | 12 | 13 | 63  | 34  | 30  | 33  | 30  | 25  |
| SMMPA06546 | 15 | 25 | 17 | 179 | 170 | 132 | 75  | 112 | 97  |
| SMMPA06547 | 9  | 7  | 5  | 13  | 18  | 13  | 22  | 26  | 23  |
| SMMPA06548 | 13 | 9  | 12 | 117 | 112 | 83  | 46  | 60  | 42  |
| SMMPA06549 | 15 | 12 | 11 | 83  | 55  | 49  | 50  | 59  | 56  |
| SMMPA06550 | 18 | 23 | 26 | 115 | 111 | 66  | 62  | 84  | 94  |
| SMMPA06551 | 5  | 2  | 2  | 15  | 18  | 14  | 13  | 10  | 8   |
| SMMPA06552 | 12 | 6  | 8  | 117 | 122 | 118 | 41  | 53  | 47  |
| SMMPA06553 | 7  | 6  | 7  | 130 | 152 | 135 | 72  | 80  | 72  |
| SMMPA06554 | 18 | 19 | 11 | 745 | 800 | 884 | 282 | 383 | 304 |
| SMMPA06555 | 9  | 4  | 3  | 226 | 190 | 209 | 92  | 98  | 89  |
| SMMPA06556 | 29 | 32 | 30 | 123 | 119 | 99  | 64  | 81  | 78  |
| SMMPA06557 | 94 | 98 | 83 | 103 | 95  | 74  | 76  | 108 | 134 |
| SMMPA06558 | 23 | 36 | 25 | 161 | 151 | 119 | 73  | 111 | 97  |
| SMMPA06559 | 24 | 21 | 20 | 143 | 121 | 74  | 50  | 55  | 62  |
| SMMPA06560 | 27 | 32 | 23 | 112 | 105 | 95  | 64  | 97  | 85  |
| SMMPA06561 | 31 | 21 | 23 | 69  | 65  | 46  | 40  | 66  | 57  |
| SMMPA06562 | 41 | 46 | 32 | 69  | 49  | 45  | 54  | 55  | 61  |
| SMMPA06563 | 18 | 16 | 4  | 84  | 91  | 52  | 34  | 41  | 40  |

|            |    |    |    |     |     |     |     |     |     |
|------------|----|----|----|-----|-----|-----|-----|-----|-----|
| SMMPA06564 | 24 | 33 | 37 | 133 | 122 | 100 | 70  | 91  | 104 |
| SMMPA06565 | 32 | 28 | 31 | 127 | 106 | 83  | 123 | 126 | 110 |
| SMMPA06566 | 29 | 40 | 38 | 136 | 137 | 114 | 99  | 104 | 122 |
| SMMPA06567 | 38 | 45 | 32 | 116 | 134 | 121 | 67  | 76  | 64  |
| SMMPA06568 | 27 | 19 | 22 | 51  | 54  | 43  | 34  | 50  | 37  |
| SMMPA06569 | 10 | 10 | 3  | 123 | 143 | 103 | 62  | 86  | 98  |
| SMMPA06570 | 27 | 12 | 24 | 313 | 285 | 193 | 143 | 170 | 199 |
| SMMPA06571 | 6  | 11 | 11 | 457 | 417 | 416 | 380 | 469 | 429 |
| SMMPA06572 | 2  | 8  | 9  | 65  | 50  | 34  | 34  | 52  | 50  |
| SMMPA06573 | 6  | 11 | 5  | 156 | 113 | 88  | 116 | 130 | 152 |
| SMMPA06574 | 60 | 71 | 52 | 486 | 486 | 428 | 450 | 547 | 568 |
| SMMPA06575 | 26 | 24 | 19 | 238 | 244 | 204 | 157 | 219 | 216 |
| SMMPA06576 | 22 | 18 | 15 | 196 | 226 | 157 | 104 | 121 | 126 |
| SMMPA06577 | 19 | 20 | 16 | 113 | 104 | 77  | 35  | 59  | 46  |
| SMMPA06578 | 12 | 13 | 10 | 17  | 14  | 11  | 16  | 31  | 33  |
| SMMPA06579 | 18 | 13 | 6  | 55  | 75  | 44  | 34  | 51  | 28  |
| SMMPA06580 | 24 | 30 | 20 | 63  | 57  | 26  | 32  | 41  | 45  |
| SMMPA06581 | 20 | 15 | 10 | 60  | 40  | 24  | 23  | 35  | 39  |
| SMMPA06582 | 24 | 29 | 23 | 72  | 66  | 55  | 36  | 39  | 35  |
| SMMPA06583 | 8  | 3  | 1  | 7   | 3   | 5   | 6   | 4   | 5   |
| SMMPA06584 | 12 | 17 | 12 | 90  | 92  | 57  | 43  | 52  | 40  |
| SMMPA06585 | 13 | 7  | 9  | 34  | 21  | 28  | 19  | 34  | 27  |
| SMMPA06586 | 15 | 14 | 19 | 60  | 76  | 36  | 33  | 44  | 31  |
| SMMPA06587 | 11 | 15 | 11 | 7   | 6   | 7   | 10  | 13  | 14  |
| SMMPA06588 | 1  | 3  | 3  | 2   | 2   | 2   | 1   | 2   | 4   |
| SMMPA06589 | 21 | 20 | 23 | 23  | 20  | 26  | 30  | 35  | 25  |
| SMMPA06590 | 19 | 20 | 16 | 21  | 23  | 17  | 17  | 25  | 20  |
| SMMPA06591 | 2  | 3  | 2  | 8   | 5   | 7   | 3   | 7   | 6   |
| SMMPA06592 | 30 | 44 | 32 | 68  | 76  | 63  | 60  | 65  | 71  |
| SMMPA06593 | 21 | 23 | 24 | 68  | 58  | 56  | 38  | 57  | 40  |
| SMMPA06594 | 15 | 23 | 24 | 236 | 199 | 149 | 93  | 121 | 95  |
| SMMPA06595 | 19 | 11 | 12 | 29  | 44  | 28  | 21  | 31  | 29  |
| SMMPA06596 | 12 | 7  | 7  | 25  | 22  | 25  | 13  | 13  | 30  |
| SMMPA06597 | 13 | 13 | 9  | 28  | 16  | 17  | 18  | 21  | 26  |
| SMMPA06598 | 22 | 9  | 8  | 170 | 188 | 162 | 90  | 117 | 99  |
| SMMPA06599 | 23 | 31 | 20 | 32  | 26  | 28  | 42  | 44  | 39  |
| SMMPA06600 | 21 | 18 | 16 | 32  | 39  | 35  | 23  | 36  | 30  |
| SMMPA06601 | 26 | 21 | 19 | 126 | 110 | 77  | 60  | 79  | 68  |
| SMMPA06602 | 15 | 10 | 22 | 36  | 33  | 35  | 43  | 43  | 43  |
| SMMPA06603 | 28 | 22 | 28 | 39  | 45  | 28  | 39  | 54  | 39  |
| SMMPA06604 | 32 | 45 | 33 | 49  | 33  | 40  | 46  | 52  | 55  |

|            |    |    |    |     |     |     |    |     |     |
|------------|----|----|----|-----|-----|-----|----|-----|-----|
| SMMPA06605 | 18 | 19 | 13 | 13  | 23  | 14  | 13 | 25  | 14  |
| SMMPA06606 | 16 | 23 | 22 | 52  | 35  | 26  | 29 | 44  | 42  |
| SMMPA06607 | 17 | 12 | 18 | 21  | 18  | 24  | 12 | 21  | 20  |
| SMMPA06608 | 15 | 25 | 25 | 47  | 51  | 39  | 27 | 38  | 40  |
| SMMPA06609 | 30 | 27 | 23 | 74  | 82  | 57  | 42 | 36  | 40  |
| SMMPA06610 | 27 | 27 | 30 | 42  | 43  | 26  | 31 | 40  | 32  |
| SMMPA06611 | 18 | 20 | 18 | 65  | 66  | 39  | 41 | 27  | 34  |
| SMMPA06612 | 9  | 30 | 20 | 31  | 36  | 28  | 31 | 40  | 32  |
| SMMPA06613 | 16 | 19 | 18 | 57  | 51  | 35  | 24 | 33  | 35  |
| SMMPA06614 | 28 | 25 | 27 | 123 | 132 | 76  | 46 | 75  | 65  |
| SMMPA06615 | 8  | 10 | 13 | 18  | 16  | 10  | 12 | 22  | 18  |
| SMMPA06616 | 17 | 23 | 20 | 39  | 30  | 29  | 28 | 22  | 29  |
| SMMPA06617 | 17 | 19 | 17 | 37  | 32  | 27  | 31 | 30  | 23  |
| SMMPA06618 | 13 | 9  | 9  | 26  | 19  | 14  | 19 | 22  | 16  |
| SMMPA06619 | 29 | 19 | 20 | 203 | 184 | 148 | 72 | 82  | 94  |
| SMMPA06620 | 18 | 27 | 21 | 109 | 115 | 80  | 39 | 63  | 53  |
| SMMPA06621 | 8  | 14 | 7  | 66  | 59  | 41  | 24 | 16  | 39  |
| SMMPA06622 | 34 | 30 | 28 | 86  | 77  | 58  | 45 | 60  | 74  |
| SMMPA06623 | 57 | 65 | 64 | 38  | 54  | 41  | 54 | 47  | 59  |
| SMMPA06624 | 66 | 59 | 52 | 62  | 69  | 45  | 47 | 78  | 79  |
| SMMPA06625 | 17 | 14 | 9  | 18  | 24  | 26  | 20 | 30  | 32  |
| SMMPA06626 | 21 | 19 | 17 | 46  | 43  | 40  | 21 | 23  | 27  |
| SMMPA06627 | 14 | 10 | 11 | 26  | 28  | 17  | 18 | 32  | 25  |
| SMMPA06628 | 23 | 26 | 14 | 145 | 108 | 89  | 57 | 79  | 61  |
| SMMPA06629 | 14 | 10 | 8  | 44  | 28  | 25  | 12 | 12  | 22  |
| SMMPA06630 | 17 | 19 | 26 | 48  | 41  | 29  | 18 | 30  | 30  |
| SMMPA06631 | 5  | 9  | 17 | 25  | 23  | 18  | 18 | 11  | 15  |
| SMMPA06632 | 14 | 18 | 15 | 30  | 29  | 25  | 33 | 38  | 37  |
| SMMPA06633 | 18 | 22 | 18 | 37  | 35  | 18  | 21 | 27  | 29  |
| SMMPA06634 | 6  | 7  | 13 | 44  | 39  | 39  | 21 | 33  | 26  |
| SMMPA06635 | 16 | 23 | 16 | 144 | 102 | 73  | 80 | 113 | 121 |
| SMMPA06636 | 4  | 20 | 14 | 48  | 46  | 37  | 50 | 51  | 61  |
| SMMPA06637 | 40 | 33 | 28 | 16  | 25  | 26  | 38 | 40  | 49  |
| SMMPA06638 | 8  | 7  | 5  | 53  | 54  | 53  | 26 | 38  | 39  |
| SMMPA06639 | 29 | 15 | 16 | 68  | 62  | 51  | 40 | 36  | 45  |
| SMMPA06640 | 20 | 14 | 18 | 251 | 220 | 211 | 72 | 125 | 92  |
| SMMPA06641 | 12 | 10 | 9  | 151 | 165 | 116 | 80 | 90  | 86  |
| SMMPA06642 | 9  | 15 | 15 | 57  | 57  | 49  | 25 | 28  | 26  |
| SMMPA06643 | 34 | 25 | 20 | 64  | 56  | 50  | 32 | 44  | 57  |
| SMMPA06644 | 42 | 38 | 31 | 107 | 123 | 104 | 46 | 80  | 72  |
| SMMPA06645 | 16 | 8  | 14 | 30  | 29  | 19  | 22 | 38  | 29  |

|            |    |    |    |     |     |     |     |     |     |
|------------|----|----|----|-----|-----|-----|-----|-----|-----|
| SMMPA06646 | 15 | 34 | 17 | 181 | 144 | 104 | 64  | 94  | 77  |
| SMMPA06647 | 17 | 17 | 11 | 115 | 112 | 84  | 54  | 66  | 51  |
| SMMPA06648 | 20 | 19 | 18 | 43  | 38  | 45  | 26  | 32  | 26  |
| SMMPA06649 | 26 | 28 | 15 | 39  | 42  | 43  | 42  | 56  | 44  |
| SMMPA06650 | 19 | 16 | 13 | 283 | 230 | 228 | 47  | 86  | 68  |
| SMMPA06651 | 16 | 15 | 23 | 152 | 149 | 114 | 52  | 60  | 62  |
| SMMPA06652 | 11 | 14 | 16 | 636 | 629 | 643 | 133 | 159 | 116 |
| SMMPA06653 | 19 | 16 | 11 | 184 | 179 | 147 | 43  | 52  | 47  |
| SMMPA06654 | 15 | 9  | 12 | 149 | 179 | 154 | 54  | 48  | 60  |
| SMMPA06655 | 9  | 13 | 13 | 108 | 83  | 69  | 45  | 55  | 58  |
| SMMPA06656 | 31 | 33 | 25 | 162 | 165 | 130 | 69  | 93  | 76  |
| SMMPA06657 | 6  | 9  | 9  | 42  | 44  | 39  | 18  | 24  | 30  |
| SMMPA06658 | 20 | 20 | 15 | 56  | 61  | 49  | 33  | 46  | 44  |
| SMMPA06659 | 5  | 7  | 6  | 49  | 30  | 23  | 10  | 15  | 17  |
| SMMPA06660 | 18 | 20 | 22 | 32  | 31  | 28  | 30  | 35  | 37  |
| SMMPA06661 | 17 | 9  | 7  | 27  | 29  | 30  | 17  | 14  | 23  |
| SMMPA06662 | 11 | 11 | 15 | 46  | 23  | 24  | 26  | 35  | 37  |
| SMMPA06663 | 16 | 17 | 8  | 186 | 150 | 147 | 132 | 175 | 172 |
| SMMPA06664 | 14 | 12 | 19 | 83  | 87  | 57  | 90  | 128 | 97  |
| SMMPA06665 | 15 | 10 | 15 | 126 | 93  | 82  | 45  | 60  | 57  |
| SMMPA06666 | 11 | 10 | 8  | 46  | 37  | 29  | 25  | 27  | 25  |
| SMMPA06667 | 23 | 29 | 31 | 59  | 45  | 40  | 41  | 63  | 61  |
| SMMPA06668 | 31 | 22 | 20 | 82  | 76  | 45  | 45  | 51  | 57  |
| SMMPA06669 | 22 | 20 | 21 | 118 | 100 | 89  | 51  | 64  | 73  |
| SMMPA06670 | 19 | 21 | 16 | 58  | 54  | 44  | 35  | 32  | 39  |
| SMMPA06671 | 64 | 53 | 62 | 336 | 323 | 251 | 165 | 219 | 233 |
| SMMPA06672 | 19 | 18 | 21 | 302 | 281 | 212 | 159 | 212 | 182 |
| SMMPA06673 | 21 | 25 | 35 | 112 | 106 | 74  | 53  | 60  | 71  |
| SMMPA06674 | 22 | 30 | 18 | 53  | 37  | 48  | 32  | 42  | 30  |
| SMMPA06675 | 34 | 40 | 33 | 109 | 91  | 85  | 43  | 92  | 82  |
| SMMPA06676 | 36 | 44 | 29 | 105 | 86  | 71  | 63  | 91  | 66  |
| SMMPA06677 | 22 | 24 | 14 | 63  | 64  | 55  | 72  | 77  | 61  |
| SMMPA06678 | 24 | 15 | 30 | 77  | 71  | 49  | 51  | 72  | 44  |
| SMMPA06679 | 20 | 20 | 20 | 72  | 76  | 53  | 45  | 73  | 54  |
| SMMPA06680 | 32 | 32 | 19 | 149 | 97  | 96  | 89  | 119 | 103 |
| SMMPA06681 | 10 | 14 | 25 | 45  | 46  | 21  | 29  | 42  | 35  |
| SMMPA06682 | 28 | 40 | 13 | 128 | 105 | 89  | 73  | 102 | 81  |
| SMMPA06683 | 19 | 36 | 36 | 115 | 121 | 102 | 64  | 86  | 93  |
| SMMPA06684 | 29 | 40 | 26 | 60  | 41  | 34  | 31  | 44  | 58  |
| SMMPA06685 | 21 | 31 | 22 | 133 | 90  | 84  | 72  | 87  | 93  |
| SMMPA06686 | 30 | 23 | 24 | 25  | 27  | 25  | 31  | 40  | 54  |

|            |    |    |    |      |      |      |     |     |     |
|------------|----|----|----|------|------|------|-----|-----|-----|
| SMMPA06687 | 23 | 27 | 19 | 41   | 34   | 37   | 17  | 30  | 24  |
| SMMPA06688 | 7  | 16 | 8  | 14   | 13   | 8    | 15  | 11  | 15  |
| SMMPA06689 | 20 | 23 | 24 | 22   | 18   | 19   | 13  | 19  | 17  |
| SMMPA06690 | 7  | 13 | 17 | 18   | 12   | 16   | 17  | 8   | 14  |
| SMMPA06691 | 32 | 34 | 33 | 62   | 55   | 55   | 34  | 52  | 40  |
| SMMPA06692 | 28 | 25 | 29 | 45   | 61   | 48   | 29  | 36  | 36  |
| SMMPA06693 | 7  | 9  | 4  | 81   | 85   | 66   | 41  | 48  | 54  |
| SMMPA06694 | 12 | 8  | 12 | 116  | 138  | 83   | 70  | 71  | 76  |
| SMMPA06695 | 17 | 25 | 14 | 193  | 140  | 126  | 45  | 67  | 45  |
| SMMPA06696 | 10 | 6  | 3  | 51   | 56   | 39   | 32  | 36  | 34  |
| SMMPA06697 | 20 | 15 | 7  | 162  | 167  | 122  | 47  | 55  | 69  |
| SMMPA06698 | 6  | 5  | 9  | 67   | 76   | 44   | 34  | 62  | 43  |
| SMMPA06699 | 13 | 8  | 9  | 47   | 53   | 45   | 26  | 31  | 33  |
| SMMPA06700 | 20 | 16 | 20 | 172  | 132  | 114  | 79  | 93  | 88  |
| SMMPA06701 | 10 | 7  | 5  | 22   | 26   | 14   | 17  | 25  | 25  |
| SMMPA06702 | 14 | 13 | 15 | 120  | 117  | 105  | 51  | 71  | 74  |
| SMMPA06703 | 17 | 17 | 19 | 28   | 31   | 33   | 22  | 32  | 25  |
| SMMPA06704 | 11 | 11 | 8  | 30   | 34   | 25   | 29  | 28  | 33  |
| SMMPA06705 | 23 | 40 | 24 | 29   | 30   | 31   | 19  | 33  | 27  |
| SMMPA06706 | 13 | 9  | 12 | 32   | 28   | 10   | 12  | 18  | 19  |
| SMMPA06707 | 16 | 15 | 20 | 10   | 15   | 16   | 23  | 19  | 20  |
| SMMPA06708 | 34 | 17 | 17 | 40   | 42   | 34   | 27  | 35  | 32  |
| SMMPA06709 | 10 | 8  | 13 | 15   | 28   | 13   | 7   | 16  | 15  |
| SMMPA06710 | 18 | 19 | 18 | 28   | 23   | 27   | 24  | 31  | 29  |
| SMMPA06711 | 22 | 36 | 22 | 35   | 49   | 41   | 51  | 47  | 54  |
| SMMPA06712 | 13 | 11 | 7  | 19   | 21   | 15   | 15  | 19  | 22  |
| SMMPA06713 | 21 | 15 | 14 | 50   | 43   | 36   | 22  | 21  | 34  |
| SMMPA06714 | 17 | 26 | 18 | 115  | 139  | 108  | 62  | 81  | 68  |
| SMMPA06715 | 19 | 22 | 16 | 55   | 64   | 50   | 25  | 31  | 33  |
| SMMPA06716 | 13 | 16 | 8  | 42   | 57   | 38   | 19  | 24  | 34  |
| SMMPA06717 | 19 | 24 | 22 | 68   | 59   | 46   | 34  | 46  | 49  |
| SMMPA06718 | 42 | 45 | 38 | 90   | 95   | 63   | 45  | 55  | 49  |
| SMMPA06719 | 8  | 6  | 3  | 14   | 9    | 16   | 7   | 17  | 3   |
| SMMPA06720 | 29 | 36 | 26 | 75   | 63   | 53   | 26  | 38  | 42  |
| SMMPA06721 | 35 | 34 | 23 | 40   | 43   | 41   | 38  | 42  | 51  |
| SMMPA06722 | 19 | 24 | 26 | 51   | 38   | 35   | 24  | 43  | 25  |
| SMMPA06723 | 22 | 20 | 17 | 28   | 23   | 18   | 10  | 21  | 23  |
| SMMPA06724 | 12 | 11 | 14 | 29   | 39   | 30   | 23  | 31  | 28  |
| SMMPA06725 | 12 | 7  | 7  | 35   | 35   | 24   | 28  | 35  | 19  |
| SMMPA06726 | 41 | 40 | 36 | 45   | 42   | 36   | 48  | 55  | 51  |
| SMMPA06727 | 25 | 9  | 14 | 1088 | 1063 | 1018 | 428 | 547 | 541 |

|            |    |    |    |     |     |     |     |     |     |
|------------|----|----|----|-----|-----|-----|-----|-----|-----|
| SMMPA06728 | 7  | 2  | 1  | 19  | 21  | 25  | 23  | 24  | 23  |
| SMMPA06729 | 0  | 8  | 5  | 65  | 90  | 87  | 25  | 27  | 29  |
| SMMPA06730 | 19 | 26 | 24 | 76  | 87  | 76  | 41  | 58  | 47  |
| SMMPA06731 | 28 | 29 | 27 | 199 | 194 | 135 | 90  | 102 | 90  |
| SMMPA06732 | 10 | 10 | 11 | 31  | 24  | 25  | 14  | 17  | 26  |
| SMMPA06733 | 10 | 7  | 7  | 20  | 23  | 26  | 11  | 15  | 16  |
| SMMPA06734 | 25 | 24 | 24 | 54  | 60  | 45  | 38  | 52  | 52  |
| SMMPA06735 | 16 | 11 | 19 | 133 | 100 | 97  | 45  | 52  | 56  |
| SMMPA06736 | 25 | 25 | 16 | 68  | 59  | 53  | 50  | 60  | 44  |
| SMMPA06737 | 8  | 12 | 11 | 19  | 27  | 21  | 23  | 25  | 20  |
| SMMPA06738 | 21 | 17 | 17 | 24  | 21  | 17  | 20  | 21  | 14  |
| SMMPA06739 | 11 | 12 | 14 | 28  | 22  | 31  | 25  | 36  | 35  |
| SMMPA06740 | 15 | 26 | 18 | 33  | 40  | 28  | 24  | 29  | 34  |
| SMMPA06741 | 15 | 10 | 14 | 14  | 20  | 17  | 13  | 24  | 25  |
| SMMPA06742 | 26 | 19 | 16 | 65  | 60  | 32  | 47  | 60  | 56  |
| SMMPA06743 | 14 | 22 | 21 | 117 | 108 | 94  | 62  | 84  | 66  |
| SMMPA06744 | 3  | 18 | 12 | 41  | 50  | 37  | 18  | 17  | 11  |
| SMMPA06745 | 18 | 19 | 18 | 40  | 40  | 45  | 22  | 34  | 27  |
| SMMPA06746 | 20 | 29 | 20 | 82  | 80  | 54  | 32  | 59  | 44  |
| SMMPA06747 | 25 | 26 | 19 | 209 | 175 | 127 | 107 | 160 | 115 |
| SMMPA06748 | 29 | 24 | 22 | 45  | 43  | 47  | 47  | 82  | 82  |
| SMMPA06749 | 28 | 18 | 27 | 86  | 76  | 65  | 65  | 82  | 72  |
| SMMPA06750 | 8  | 2  | 4  | 7   | 5   | 4   | 4   | 6   | 4   |
| SMMPA06751 | 27 | 15 | 24 | 58  | 66  | 68  | 56  | 84  | 81  |
| SMMPA06752 | 15 | 21 | 25 | 93  | 64  | 59  | 56  | 69  | 64  |
| SMMPA06753 | 15 | 15 | 17 | 79  | 86  | 62  | 68  | 60  | 77  |
| SMMPA06754 | 14 | 10 | 7  | 23  | 20  | 15  | 20  | 38  | 41  |
| SMMPA06755 | 24 | 12 | 14 | 25  | 20  | 21  | 21  | 32  | 34  |
| SMMPA06756 | 12 | 10 | 12 | 39  | 32  | 17  | 18  | 26  | 23  |
| SMMPA06757 | 60 | 64 | 53 | 428 | 360 | 273 | 193 | 191 | 191 |
| SMMPA06758 | 18 | 14 | 27 | 158 | 184 | 105 | 58  | 98  | 89  |
| SMMPA06759 | 34 | 30 | 28 | 63  | 63  | 47  | 39  | 60  | 46  |
| SMMPA06760 | 8  | 10 | 10 | 18  | 19  | 19  | 17  | 14  | 10  |
| SMMPA06761 | 48 | 70 | 66 | 304 | 262 | 197 | 156 | 183 | 170 |
| SMMPA06762 | 77 | 93 | 73 | 395 | 386 | 333 | 194 | 287 | 213 |
| SMMPA06763 | 32 | 18 | 25 | 50  | 49  | 33  | 24  | 37  | 41  |
| SMMPA06764 | 11 | 18 | 13 | 17  | 27  | 23  | 28  | 44  | 25  |
| SMMPA06765 | 14 | 21 | 9  | 87  | 97  | 50  | 40  | 53  | 51  |
| SMMPA06766 | 24 | 27 | 25 | 55  | 44  | 38  | 36  | 47  | 44  |
| SMMPA06767 | 25 | 31 | 36 | 190 | 192 | 135 | 117 | 133 | 110 |
| SMMPA06768 | 21 | 19 | 23 | 44  | 31  | 45  | 24  | 32  | 28  |

|            |    |    |    |     |     |     |     |     |     |
|------------|----|----|----|-----|-----|-----|-----|-----|-----|
| SMMPA06769 | 32 | 30 | 34 | 833 | 852 | 671 | 145 | 193 | 190 |
| SMMPA06770 | 18 | 19 | 15 | 35  | 41  | 31  | 13  | 17  | 21  |
| SMMPA06771 | 25 | 22 | 20 | 26  | 44  | 29  | 20  | 26  | 22  |
| SMMPA06772 | 29 | 22 | 20 | 47  | 38  | 37  | 36  | 26  | 36  |
| SMMPA06773 | 10 | 17 | 10 | 19  | 21  | 20  | 18  | 24  | 21  |
| SMMPA06774 | 9  | 6  | 6  | 7   | 10  | 2   | 9   | 6   | 7   |
| SMMPA06775 | 16 | 16 | 12 | 86  | 68  | 58  | 55  | 62  | 65  |
| SMMPA06776 | 39 | 45 | 41 | 73  | 52  | 63  | 40  | 44  | 50  |
| SMMPA06777 | 21 | 14 | 15 | 72  | 76  | 53  | 37  | 37  | 47  |
| SMMPA06778 | 26 | 31 | 25 | 30  | 40  | 37  | 36  | 23  | 33  |
| SMMPA06779 | 22 | 20 | 17 | 32  | 25  | 31  | 31  | 31  | 30  |
| SMMPA06780 | 15 | 17 | 16 | 32  | 22  | 20  | 19  | 23  | 23  |
| SMMPA06781 | 23 | 17 | 14 | 54  | 32  | 32  | 20  | 28  | 26  |
| SMMPA06782 | 26 | 18 | 22 | 9   | 9   | 10  | 12  | 16  | 18  |
| SMMPA06783 | 48 | 72 | 43 | 41  | 44  | 32  | 31  | 38  | 53  |
| SMMPA06784 | 10 | 9  | 19 | 25  | 16  | 10  | 12  | 16  | 20  |
| SMMPA06785 | 18 | 18 | 19 | 46  | 72  | 50  | 42  | 64  | 46  |
| SMMPA06786 | 30 | 26 | 28 | 117 | 105 | 81  | 66  | 67  | 54  |
| SMMPA06787 | 15 | 21 | 16 | 59  | 50  | 37  | 38  | 35  | 40  |
| SMMPA06788 | 10 | 12 | 17 | 44  | 37  | 44  | 24  | 48  | 55  |
| SMMPA06789 | 19 | 18 | 15 | 66  | 72  | 65  | 31  | 53  | 47  |
| SMMPA06790 | 25 | 23 | 22 | 127 | 115 | 77  | 63  | 95  | 76  |
| SMMPA06791 | 14 | 33 | 23 | 134 | 107 | 89  | 61  | 87  | 72  |
| SMMPA06792 | 2  | 4  | 7  | 40  | 56  | 35  | 23  | 22  | 14  |
| SMMPA06793 | 5  | 3  | 5  | 15  | 26  | 18  | 11  | 10  | 14  |
| SMMPA06794 | 12 | 9  | 8  | 26  | 26  | 18  | 17  | 28  | 18  |
| SMMPA06795 | 15 | 7  | 11 | 30  | 23  | 20  | 20  | 32  | 15  |
| SMMPA06796 | 29 | 38 | 21 | 68  | 63  | 48  | 54  | 70  | 67  |
| SMMPA06797 | 6  | 9  | 9  | 52  | 39  | 29  | 13  | 17  | 10  |
| SMMPA06798 | 3  | 4  | 2  | 8   | 10  | 8   | 11  | 6   | 9   |
| SMMPA06799 | 8  | 8  | 6  | 21  | 24  | 11  | 13  | 16  | 23  |
| SMMPA06800 | 11 | 5  | 5  | 14  | 14  | 9   | 12  | 16  | 11  |
| SMMPA06801 | 11 | 8  | 10 | 23  | 31  | 25  | 12  | 20  | 21  |
| SMMPA06802 | 10 | 12 | 15 | 27  | 17  | 22  | 17  | 30  | 30  |
| SMMPA06803 | 27 | 30 | 18 | 523 | 498 | 339 | 226 | 282 | 238 |
| SMMPA06804 | 17 | 12 | 9  | 175 | 130 | 95  | 79  | 86  | 99  |
| SMMPA06805 | 17 | 25 | 16 | 195 | 175 | 164 | 72  | 84  | 89  |
| SMMPA06806 | 16 | 12 | 10 | 29  | 43  | 33  | 23  | 23  | 25  |
| SMMPA06807 | 9  | 15 | 16 | 21  | 32  | 34  | 17  | 22  | 30  |
| SMMPA06808 | 12 | 8  | 11 | 47  | 64  | 60  | 12  | 28  | 19  |
| SMMPA06809 | 19 | 15 | 16 | 84  | 93  | 68  | 22  | 26  | 29  |

|            |    |    |    |     |     |     |     |     |     |
|------------|----|----|----|-----|-----|-----|-----|-----|-----|
| SMMPA06810 | 9  | 19 | 10 | 77  | 83  | 64  | 32  | 50  | 50  |
| SMMPA06811 | 20 | 15 | 20 | 30  | 39  | 27  | 24  | 35  | 28  |
| SMMPA06812 | 10 | 17 | 14 | 53  | 37  | 48  | 25  | 38  | 34  |
| SMMPA06813 | 15 | 15 | 18 | 42  | 28  | 34  | 28  | 23  | 26  |
| SMMPA06814 | 22 | 18 | 20 | 68  | 50  | 46  | 37  | 55  | 62  |
| SMMPA06815 | 1  | 2  | 4  | 6   | 6   | 3   | 14  | 25  | 9   |
| SMMPA06816 | 17 | 20 | 8  | 38  | 36  | 39  | 19  | 40  | 23  |
| SMMPA06817 | 8  | 7  | 13 | 15  | 22  | 23  | 15  | 17  | 25  |
| SMMPA06818 | 34 | 24 | 25 | 118 | 103 | 65  | 56  | 71  | 60  |
| SMMPA06819 | 9  | 19 | 10 | 61  | 47  | 48  | 30  | 37  | 36  |
| SMMPA06820 | 12 | 17 | 20 | 50  | 50  | 41  | 35  | 41  | 48  |
| SMMPA06821 | 9  | 15 | 11 | 51  | 54  | 41  | 26  | 35  | 36  |
| SMMPA06822 | 8  | 22 | 8  | 41  | 36  | 23  | 20  | 32  | 21  |
| SMMPA06823 | 9  | 13 | 11 | 105 | 79  | 68  | 24  | 44  | 41  |
| SMMPA06824 | 20 | 16 | 12 | 111 | 89  | 79  | 45  | 50  | 52  |
| SMMPA06825 | 22 | 17 | 16 | 209 | 178 | 178 | 91  | 120 | 91  |
| SMMPA06826 | 20 | 21 | 15 | 97  | 88  | 74  | 42  | 55  | 54  |
| SMMPA06827 | 14 | 16 | 8  | 126 | 111 | 84  | 29  | 52  | 41  |
| SMMPA06828 | 21 | 16 | 19 | 144 | 146 | 95  | 55  | 66  | 49  |
| SMMPA06829 | 23 | 39 | 30 | 31  | 44  | 34  | 21  | 32  | 26  |
| SMMPA06830 | 3  | 8  | 6  | 14  | 11  | 16  | 7   | 8   | 3   |
| SMMPA06831 | 26 | 22 | 26 | 31  | 32  | 28  | 33  | 28  | 40  |
| SMMPA06832 | 9  | 10 | 7  | 23  | 27  | 16  | 19  | 19  | 27  |
| SMMPA06833 | 27 | 22 | 25 | 32  | 30  | 39  | 37  | 33  | 40  |
| SMMPA06834 | 19 | 19 | 15 | 21  | 21  | 20  | 18  | 23  | 23  |
| SMMPA06835 | 20 | 23 | 23 | 38  | 35  | 27  | 29  | 24  | 38  |
| SMMPA06836 | 18 | 14 | 17 | 16  | 17  | 14  | 15  | 34  | 32  |
| SMMPA06837 | 4  | 5  | 4  | 9   | 9   | 14  | 11  | 10  | 13  |
| SMMPA06838 | 20 | 20 | 17 | 102 | 91  | 78  | 53  | 68  | 49  |
| SMMPA06839 | 6  | 13 | 9  | 24  | 21  | 24  | 14  | 17  | 21  |
| SMMPA06840 | 8  | 18 | 13 | 32  | 29  | 19  | 25  | 36  | 41  |
| SMMPA06841 | 6  | 6  | 5  | 33  | 37  | 26  | 25  | 33  | 32  |
| SMMPA06842 | 9  | 11 | 10 | 43  | 28  | 37  | 30  | 21  | 31  |
| SMMPA06843 | 6  | 5  | 12 | 45  | 34  | 38  | 22  | 17  | 26  |
| SMMPA06844 | 13 | 11 | 8  | 38  | 35  | 41  | 25  | 25  | 26  |
| SMMPA06845 | 13 | 24 | 22 | 46  | 40  | 33  | 27  | 35  | 36  |
| SMMPA06846 | 16 | 19 | 17 | 43  | 40  | 37  | 28  | 37  | 34  |
| SMMPA06847 | 30 | 38 | 35 | 467 | 449 | 382 | 220 | 264 | 257 |
| SMMPA06848 | 41 | 43 | 50 | 98  | 91  | 69  | 54  | 59  | 63  |
| SMMPA06849 | 16 | 14 | 7  | 19  | 16  | 12  | 21  | 25  | 22  |
| SMMPA06850 | 25 | 20 | 18 | 65  | 53  | 32  | 36  | 47  | 58  |



|            |    |    |    |     |     |     |     |     |     |
|------------|----|----|----|-----|-----|-----|-----|-----|-----|
| SMMPA06851 | 22 | 17 | 17 | 178 | 171 | 131 | 77  | 94  | 82  |
| SMMPA06852 | 14 | 10 | 12 | 25  | 23  | 20  | 12  | 13  | 15  |
| SMMPA06853 | 14 | 17 | 14 | 65  | 90  | 64  | 43  | 47  | 53  |
| SMMPA06854 | 14 | 12 | 19 | 82  | 82  | 70  | 46  | 59  | 47  |
| SMMPA06855 | 15 | 21 | 14 | 143 | 127 | 76  | 47  | 60  | 68  |
| SMMPA06856 | 17 | 20 | 15 | 111 | 116 | 67  | 61  | 82  | 52  |
| SMMPA06857 | 40 | 38 | 42 | 34  | 38  | 40  | 47  | 51  | 56  |
| SMMPA06858 | 33 | 39 | 17 | 51  | 48  | 39  | 35  | 50  | 50  |
| SMMPA06859 | 24 | 22 | 16 | 45  | 35  | 31  | 34  | 45  | 37  |
| SMMPA06860 | 19 | 24 | 28 | 52  | 50  | 48  | 35  | 45  | 35  |
| SMMPA06861 | 82 | 82 | 85 | 82  | 86  | 64  | 101 | 122 | 132 |
| SMMPA06862 | 20 | 34 | 20 | 50  | 52  | 32  | 36  | 55  | 46  |
| SMMPA06863 | 13 | 19 | 13 | 55  | 65  | 33  | 31  | 39  | 41  |
| SMMPA06864 | 13 | 22 | 15 | 52  | 38  | 33  | 28  | 37  | 36  |
| SMMPA06865 | 21 | 24 | 11 | 137 | 106 | 102 | 41  | 48  | 55  |
| SMMPA06866 | 12 | 13 | 23 | 32  | 42  | 37  | 36  | 36  | 30  |
| SMMPA06867 | 15 | 13 | 16 | 56  | 55  | 41  | 44  | 46  | 31  |
| SMMPA06868 | 24 | 22 | 15 | 52  | 56  | 36  | 25  | 28  | 35  |
| SMMPA06869 | 13 | 15 | 12 | 57  | 41  | 40  | 27  | 36  | 39  |
| SMMPA06870 | 14 | 17 | 10 | 43  | 46  | 30  | 19  | 33  | 32  |
| SMMPA06871 | 20 | 23 | 19 | 36  | 36  | 31  | 19  | 22  | 18  |
| SMMPA06872 | 3  | 8  | 8  | 27  | 23  | 16  | 9   | 15  | 13  |
| SMMPA06873 | 26 | 32 | 32 | 84  | 67  | 59  | 39  | 51  | 49  |
| SMMPA06874 | 18 | 9  | 12 | 38  | 44  | 34  | 22  | 30  | 31  |
| SMMPA06875 | 22 | 16 | 12 | 27  | 27  | 30  | 23  | 33  | 30  |
| SMMPA06876 | 22 | 20 | 16 | 39  | 35  | 33  | 19  | 39  | 27  |
| SMMPA06877 | 31 | 37 | 34 | 149 | 130 | 107 | 60  | 101 | 63  |
| SMMPA06878 | 37 | 45 | 34 | 231 | 232 | 216 | 75  | 101 | 91  |
| SMMPA06879 | 27 | 39 | 38 | 505 | 531 | 384 | 234 | 335 | 345 |
| SMMPA06880 | 24 | 30 | 20 | 306 | 287 | 204 | 160 | 200 | 185 |
| SMMPA06881 | 22 | 37 | 29 | 890 | 854 | 665 | 370 | 524 | 496 |
| SMMPA06882 | 26 | 18 | 19 | 654 | 571 | 425 | 355 | 385 | 374 |
| SMMPA06883 | 15 | 17 | 21 | 624 | 539 | 492 | 350 | 474 | 435 |
| SMMPA06884 | 8  | 8  | 7  | 9   | 13  | 10  | 9   | 19  | 24  |
| SMMPA06885 | 22 | 19 | 13 | 107 | 98  | 74  | 50  | 77  | 69  |
| SMMPA06886 | 62 | 53 | 38 | 196 | 195 | 115 | 109 | 135 | 133 |
| SMMPA06887 | 41 | 39 | 45 | 490 | 450 | 381 | 229 | 332 | 288 |
| SMMPA06888 | 14 | 12 | 19 | 41  | 46  | 39  | 25  | 32  | 35  |
| SMMPA06889 | 9  | 18 | 14 | 240 | 250 | 194 | 117 | 166 | 160 |
| SMMPA06890 | 23 | 24 | 29 | 214 | 198 | 162 | 108 | 139 | 136 |
| SMMPA06891 | 29 | 25 | 28 | 141 | 131 | 123 | 55  | 75  | 66  |

|            |    |    |    |     |     |     |     |     |     |
|------------|----|----|----|-----|-----|-----|-----|-----|-----|
| SMMPA06892 | 17 | 12 | 18 | 33  | 25  | 18  | 29  | 24  | 41  |
| SMMPA06893 | 10 | 14 | 12 | 13  | 14  | 13  | 12  | 15  | 24  |
| SMMPA06894 | 20 | 29 | 19 | 76  | 76  | 42  | 56  | 72  | 40  |
| SMMPA06895 | 17 | 17 | 9  | 27  | 30  | 21  | 31  | 31  | 31  |
| SMMPA06896 | 14 | 16 | 17 | 20  | 19  | 28  | 20  | 25  | 18  |
| SMMPA06897 | 55 | 69 | 54 | 81  | 70  | 57  | 33  | 61  | 61  |
| SMMPA06898 | 10 | 6  | 4  | 23  | 28  | 18  | 19  | 17  | 13  |
| SMMPA06899 | 20 | 24 | 23 | 55  | 40  | 29  | 38  | 50  | 40  |
| SMMPA06900 | 22 | 20 | 23 | 22  | 19  | 22  | 31  | 39  | 22  |
| SMMPA06901 | 30 | 23 | 23 | 74  | 49  | 42  | 25  | 42  | 34  |
| SMMPA06902 | 16 | 22 | 19 | 61  | 49  | 43  | 31  | 59  | 43  |
| SMMPA06903 | 26 | 23 | 23 | 39  | 31  | 35  | 38  | 50  | 34  |
| SMMPA06904 | 7  | 9  | 12 | 37  | 49  | 31  | 22  | 27  | 32  |
| SMMPA06905 | 13 | 14 | 11 | 72  | 74  | 54  | 37  | 58  | 51  |
| SMMPA06906 | 4  | 2  | 1  | 1   | 3   | 5   | 3   | 7   | 7   |
| SMMPA06907 | 16 | 27 | 20 | 46  | 40  | 43  | 20  | 35  | 29  |
| SMMPA06908 | 5  | 3  | 6  | 74  | 85  | 52  | 33  | 43  | 49  |
| SMMPA06909 | 1  | 2  | 4  | 9   | 9   | 8   | 10  | 13  | 11  |
| SMMPA06910 | 4  | 6  | 6  | 4   | 12  | 11  | 10  | 13  | 10  |
| SMMPA06911 | 8  | 6  | 3  | 32  | 37  | 31  | 22  | 26  | 26  |
| SMMPA06912 | 5  | 6  | 6  | 86  | 63  | 45  | 30  | 56  | 47  |
| SMMPA06913 | 6  | 8  | 6  | 32  | 28  | 37  | 23  | 35  | 36  |
| SMMPA06914 | 4  | 5  | 6  | 15  | 14  | 15  | 14  | 20  | 16  |
| SMMPA06915 | 13 | 9  | 7  | 16  | 8   | 4   | 17  | 29  | 19  |
| SMMPA06916 | 24 | 28 | 19 | 60  | 59  | 44  | 44  | 51  | 47  |
| SMMPA06917 | 24 | 23 | 12 | 21  | 19  | 15  | 22  | 18  | 28  |
| SMMPA06918 | 39 | 34 | 33 | 292 | 306 | 224 | 103 | 163 | 142 |
| SMMPA06919 | 21 | 10 | 20 | 134 | 88  | 88  | 58  | 72  | 59  |
| SMMPA06920 | 10 | 9  | 12 | 60  | 57  | 47  | 29  | 30  | 30  |
| SMMPA06921 | 4  | 4  | 4  | 42  | 41  | 24  | 22  | 22  | 26  |
| SMMPA06922 | 20 | 30 | 19 | 207 | 178 | 145 | 71  | 95  | 90  |
| SMMPA06923 | 43 | 34 | 33 | 113 | 123 | 103 | 77  | 92  | 76  |
| SMMPA06924 | 18 | 14 | 14 | 94  | 110 | 76  | 63  | 69  | 60  |
| SMMPA06925 | 9  | 10 | 4  | 36  | 29  | 26  | 28  | 28  | 26  |
| SMMPA06926 | 13 | 9  | 12 | 112 | 98  | 82  | 36  | 43  | 74  |
| SMMPA06927 | 30 | 20 | 16 | 107 | 70  | 53  | 59  | 84  | 69  |
| SMMPA06928 | 24 | 27 | 21 | 87  | 91  | 75  | 51  | 93  | 80  |
| SMMPA06929 | 16 | 19 | 11 | 41  | 39  | 37  | 30  | 33  | 40  |
| SMMPA06930 | 26 | 17 | 19 | 30  | 34  | 32  | 30  | 50  | 50  |
| SMMPA06931 | 6  | 13 | 3  | 5   | 2   | 4   | 3   | 13  | 2   |
| SMMPA06932 | 22 | 16 | 22 | 40  | 36  | 28  | 23  | 34  | 32  |

|            |    |    |    |     |     |     |     |     |     |
|------------|----|----|----|-----|-----|-----|-----|-----|-----|
| SMMPA06933 | 22 | 11 | 12 | 32  | 15  | 18  | 16  | 22  | 26  |
| SMMPA06934 | 17 | 18 | 19 | 28  | 24  | 30  | 32  | 32  | 34  |
| SMMPA06935 | 18 | 19 | 28 | 38  | 40  | 22  | 39  | 31  | 30  |
| SMMPA06936 | 17 | 19 | 14 | 14  | 19  | 21  | 25  | 19  | 23  |
| SMMPA06937 | 22 | 19 | 21 | 103 | 86  | 74  | 60  | 83  | 87  |
| SMMPA06938 | 31 | 31 | 36 | 177 | 151 | 93  | 105 | 128 | 144 |
| SMMPA06939 | 24 | 20 | 15 | 579 | 564 | 495 | 339 | 378 | 341 |
| SMMPA06940 | 8  | 13 | 10 | 158 | 123 | 107 | 120 | 134 | 133 |
| SMMPA06941 | 22 | 29 | 21 | 591 | 513 | 476 | 353 | 554 | 417 |
| SMMPA06942 | 10 | 12 | 16 | 387 | 364 | 331 | 299 | 392 | 363 |
| SMMPA06943 | 10 | 9  | 6  | 12  | 18  | 10  | 17  | 23  | 21  |
| SMMPA06944 | 3  | 3  | 6  | 22  | 25  | 13  | 17  | 23  | 21  |
| SMMPA06945 | 32 | 34 | 31 | 207 | 219 | 176 | 88  | 127 | 108 |
| SMMPA06946 | 13 | 13 | 12 | 23  | 15  | 16  | 15  | 30  | 15  |
| SMMPA06947 | 7  | 20 | 9  | 24  | 31  | 17  | 12  | 22  | 18  |
| SMMPA06948 | 17 | 6  | 10 | 28  | 41  | 29  | 29  | 28  | 29  |
| SMMPA06949 | 1  | 2  | 2  | 12  | 19  | 21  | 15  | 16  | 15  |
| SMMPA06950 | 22 | 18 | 20 | 35  | 34  | 24  | 28  | 37  | 47  |
| SMMPA06951 | 9  | 7  | 4  | 16  | 30  | 26  | 17  | 12  | 12  |
| SMMPA06952 | 15 | 15 | 12 | 14  | 25  | 23  | 16  | 13  | 17  |
| SMMPA06953 | 6  | 7  | 8  | 17  | 13  | 22  | 9   | 5   | 8   |
| SMMPA06954 | 17 | 17 | 12 | 90  | 70  | 61  | 30  | 42  | 41  |
| SMMPA06955 | 19 | 20 | 25 | 20  | 12  | 18  | 15  | 30  | 25  |
| SMMPA06956 | 17 | 14 | 15 | 22  | 21  | 15  | 15  | 32  | 30  |
| SMMPA06957 | 17 | 16 | 15 | 81  | 61  | 51  | 45  | 61  | 55  |
| SMMPA06958 | 19 | 17 | 17 | 37  | 54  | 42  | 30  | 49  | 33  |
| SMMPA06959 | 10 | 8  | 10 | 12  | 24  | 16  | 14  | 23  | 25  |
| SMMPA06960 | 24 | 25 | 23 | 81  | 76  | 85  | 53  | 70  | 64  |
| SMMPA06961 | 44 | 54 | 51 | 122 | 104 | 76  | 55  | 81  | 61  |
| SMMPA06962 | 18 | 31 | 12 | 49  | 68  | 48  | 40  | 65  | 40  |
| SMMPA06963 | 24 | 9  | 17 | 66  | 64  | 45  | 30  | 50  | 46  |
| SMMPA06964 | 21 | 17 | 22 | 51  | 39  | 24  | 42  | 56  | 55  |
| SMMPA06965 | 8  | 7  | 6  | 16  | 22  | 9   | 12  | 16  | 14  |
| SMMPA06966 | 14 | 11 | 15 | 50  | 51  | 42  | 25  | 59  | 49  |
| SMMPA06967 | 32 | 21 | 20 | 119 | 73  | 81  | 49  | 53  | 62  |
| SMMPA06968 | 25 | 33 | 23 | 53  | 42  | 30  | 39  | 46  | 49  |
| SMMPA06969 | 13 | 10 | 8  | 31  | 22  | 24  | 42  | 19  | 28  |
| SMMPA06970 | 28 | 36 | 24 | 322 | 255 | 228 | 131 | 162 | 150 |
| SMMPA06971 | 26 | 20 | 15 | 202 | 169 | 149 | 99  | 117 | 111 |
| SMMPA06972 | 42 | 41 | 44 | 151 | 156 | 117 | 86  | 95  | 100 |
| SMMPA06973 | 6  | 4  | 7  | 99  | 66  | 56  | 52  | 50  | 63  |

|            |     |     |     |     |     |     |     |     |     |
|------------|-----|-----|-----|-----|-----|-----|-----|-----|-----|
| SMMPA06974 | 13  | 9   | 9   | 206 | 184 | 136 | 113 | 127 | 104 |
| SMMPA06975 | 27  | 14  | 14  | 283 | 231 | 182 | 111 | 142 | 130 |
| SMMPA06976 | 31  | 29  | 23  | 147 | 155 | 106 | 133 | 171 | 164 |
| SMMPA06977 | 39  | 39  | 27  | 41  | 42  | 28  | 24  | 51  | 51  |
| SMMPA06978 | 149 | 128 | 101 | 131 | 138 | 125 | 103 | 123 | 117 |
| SMMPA06979 | 42  | 46  | 41  | 42  | 31  | 24  | 38  | 38  | 52  |
| SMMPA06980 | 82  | 79  | 73  | 58  | 72  | 51  | 55  | 75  | 80  |
| SMMPA06981 | 36  | 33  | 23  | 25  | 33  | 33  | 29  | 46  | 43  |
| SMMPA06982 | 51  | 19  | 29  | 64  | 56  | 38  | 44  | 56  | 51  |
| SMMPA06983 | 2   | 1   | 1   | 1   | 1   | 3   | 0   | 2   | 6   |
| SMMPA06984 | 52  | 66  | 57  | 57  | 71  | 52  | 56  | 89  | 71  |
| SMMPA06985 | 2   | 2   | 3   | 0   | 1   | 1   | 1   | 3   | 2   |
| SMMPA06986 | 74  | 73  | 80  | 67  | 50  | 73  | 74  | 86  | 78  |
| SMMPA06987 | 29  | 28  | 26  | 24  | 18  | 18  | 16  | 22  | 25  |
| SMMPA06988 | 68  | 88  | 82  | 64  | 52  | 49  | 55  | 71  | 89  |
| SMMPA06989 | 37  | 29  | 40  | 89  | 89  | 53  | 48  | 82  | 82  |
| SMMPA06990 | 13  | 20  | 18  | 375 | 311 | 274 | 212 | 262 | 235 |
| SMMPA06991 | 29  | 29  | 26  | 108 | 88  | 57  | 59  | 48  | 59  |
| SMMPA06992 | 12  | 17  | 15  | 26  | 24  | 19  | 14  | 24  | 21  |
| SMMPA06993 | 21  | 18  | 17  | 46  | 40  | 41  | 32  | 43  | 37  |
| SMMPA06994 | 2   | 6   | 7   | 3   | 7   | 2   | 5   | 4   | 3   |
| SMMPA06995 | 9   | 9   | 14  | 20  | 10  | 16  | 10  | 10  | 5   |
| SMMPA06996 | 8   | 16  | 10  | 15  | 12  | 14  | 11  | 23  | 23  |
| SMMPA06997 | 8   | 8   | 4   | 15  | 8   | 12  | 8   | 10  | 6   |
| SMMPA06998 | 15  | 20  | 11  | 19  | 18  | 12  | 21  | 26  | 22  |
| SMMPA06999 | 19  | 20  | 24  | 40  | 25  | 33  | 36  | 40  | 45  |
| SMMPA07000 | 33  | 50  | 32  | 172 | 140 | 103 | 74  | 66  | 58  |
| SMMPA07001 | 10  | 13  | 20  | 35  | 50  | 43  | 26  | 39  | 24  |
| SMMPA07002 | 25  | 33  | 24  | 47  | 32  | 38  | 26  | 42  | 40  |
| SMMPA07003 | 13  | 14  | 16  | 55  | 59  | 43  | 33  | 43  | 44  |
| SMMPA07004 | 12  | 11  | 15  | 45  | 43  | 36  | 25  | 31  | 30  |
| SMMPA07005 | 18  | 24  | 27  | 133 | 92  | 77  | 33  | 78  | 48  |
| SMMPA07006 | 20  | 22  | 12  | 58  | 37  | 40  | 28  | 36  | 30  |
| SMMPA07007 | 14  | 15  | 13  | 39  | 37  | 39  | 24  | 27  | 31  |
| SMMPA07008 | 12  | 20  | 12  | 35  | 25  | 37  | 27  | 25  | 35  |
| SMMPA07009 | 29  | 28  | 26  | 122 | 118 | 72  | 62  | 73  | 70  |
| SMMPA07010 | 34  | 33  | 34  | 74  | 55  | 48  | 39  | 42  | 44  |
| SMMPA07011 | 19  | 25  | 17  | 54  | 42  | 29  | 36  | 40  | 41  |
| SMMPA07012 | 9   | 12  | 11  | 18  | 8   | 17  | 26  | 16  | 28  |
| SMMPA07013 | 8   | 8   | 4   | 8   | 5   | 9   | 19  | 26  | 12  |
| SMMPA07014 | 26  | 26  | 17  | 80  | 67  | 79  | 38  | 46  | 43  |

|            |    |    |    |     |     |     |     |     |     |
|------------|----|----|----|-----|-----|-----|-----|-----|-----|
| SMMPA07015 | 21 | 24 | 17 | 144 | 136 | 103 | 68  | 71  | 75  |
| SMMPA07016 | 34 | 31 | 30 | 69  | 59  | 58  | 63  | 63  | 59  |
| SMMPA07017 | 10 | 3  | 8  | 23  | 24  | 27  | 16  | 25  | 22  |
| SMMPA07018 | 15 | 17 | 20 | 24  | 23  | 22  | 22  | 28  | 24  |
| SMMPA07019 | 21 | 30 | 25 | 34  | 25  | 24  | 28  | 34  | 31  |
| SMMPA07020 | 14 | 19 | 19 | 30  | 31  | 21  | 28  | 46  | 43  |
| SMMPA07021 | 26 | 42 | 41 | 93  | 60  | 72  | 54  | 69  | 66  |
| SMMPA07022 | 43 | 52 | 57 | 92  | 83  | 64  | 55  | 68  | 90  |
| SMMPA07023 | 15 | 9  | 10 | 133 | 105 | 89  | 49  | 71  | 54  |
| SMMPA07024 | 22 | 20 | 16 | 306 | 239 | 205 | 111 | 170 | 149 |
| SMMPA07025 | 30 | 45 | 23 | 400 | 363 | 351 | 163 | 209 | 200 |
| SMMPA07026 | 23 | 13 | 15 | 324 | 241 | 225 | 127 | 150 | 148 |
| SMMPA07027 | 17 | 24 | 18 | 94  | 105 | 70  | 36  | 57  | 49  |
| SMMPA07028 | 27 | 23 | 35 | 152 | 165 | 123 | 76  | 90  | 84  |
| SMMPA07029 | 12 | 14 | 9  | 127 | 107 | 92  | 56  | 102 | 64  |
| SMMPA07030 | 26 | 23 | 21 | 141 | 127 | 101 | 76  | 103 | 104 |
| SMMPA07031 | 21 | 17 | 22 | 173 | 179 | 147 | 61  | 66  | 76  |
| SMMPA07032 | 11 | 11 | 18 | 183 | 136 | 107 | 67  | 88  | 77  |
| SMMPA07033 | 8  | 9  | 7  | 44  | 64  | 35  | 36  | 43  | 45  |
| SMMPA07034 | 22 | 26 | 18 | 274 | 234 | 189 | 154 | 176 | 208 |
| SMMPA07035 | 22 | 10 | 8  | 37  | 40  | 29  | 37  | 41  | 44  |
| SMMPA07036 | 23 | 26 | 17 | 73  | 75  | 69  | 64  | 77  | 87  |
| SMMPA07037 | 26 | 24 | 33 | 144 | 125 | 100 | 81  | 89  | 103 |
| SMMPA07038 | 5  | 12 | 12 | 38  | 39  | 25  | 22  | 38  | 30  |
| SMMPA07039 | 22 | 12 | 15 | 79  | 60  | 53  | 28  | 40  | 29  |
| SMMPA07040 | 12 | 16 | 19 | 55  | 61  | 41  | 41  | 50  | 43  |
| SMMPA07041 | 21 | 19 | 18 | 68  | 45  | 33  | 33  | 35  | 40  |
| SMMPA07042 | 14 | 24 | 17 | 38  | 30  | 24  | 30  | 25  | 20  |
| SMMPA07043 | 1  | 1  | 1  | 0   | 3   | 1   | 1   | 0   | 1   |
| SMMPA07044 | 6  | 5  | 12 | 6   | 10  | 4   | 8   | 7   | 8   |
| SMMPA07045 | 14 | 15 | 8  | 9   | 13  | 10  | 6   | 8   | 15  |
| SMMPA07046 | 12 | 3  | 6  | 12  | 6   | 9   | 11  | 15  | 7   |
| SMMPA07047 | 24 | 32 | 21 | 25  | 32  | 30  | 15  | 38  | 35  |
| SMMPA07048 | 14 | 22 | 21 | 27  | 40  | 33  | 26  | 34  | 47  |
| SMMPA07049 | 8  | 8  | 12 | 12  | 10  | 5   | 14  | 16  | 9   |
| SMMPA07050 | 27 | 18 | 13 | 26  | 24  | 20  | 24  | 45  | 45  |
| SMMPA07051 | 10 | 9  | 16 | 41  | 31  | 25  | 11  | 28  | 21  |
| SMMPA07052 | 46 | 48 | 34 | 113 | 117 | 99  | 71  | 81  | 63  |
| SMMPA07053 | 42 | 55 | 48 | 66  | 57  | 46  | 60  | 72  | 57  |
| SMMPA07054 | 67 | 57 | 51 | 137 | 94  | 93  | 87  | 114 | 127 |
| SMMPA07055 | 34 | 22 | 29 | 48  | 31  | 20  | 32  | 62  | 52  |

|            |    |    |    |     |     |     |     |     |     |
|------------|----|----|----|-----|-----|-----|-----|-----|-----|
| SMMPA07056 | 1  | 2  | 4  | 14  | 16  | 6   | 2   | 1   | 7   |
| SMMPA07057 | 5  | 4  | 4  | 22  | 39  | 18  | 8   | 8   | 5   |
| SMMPA07058 | 24 | 10 | 22 | 45  | 37  | 40  | 30  | 25  | 27  |
| SMMPA07059 | 9  | 14 | 9  | 29  | 25  | 24  | 15  | 27  | 24  |
| SMMPA07060 | 12 | 14 | 13 | 32  | 25  | 18  | 29  | 23  | 27  |
| SMMPA07061 | 45 | 44 | 30 | 38  | 35  | 30  | 36  | 46  | 43  |
| SMMPA07062 | 19 | 11 | 14 | 22  | 25  | 17  | 19  | 31  | 24  |
| SMMPA07063 | 5  | 3  | 7  | 12  | 7   | 8   | 7   | 8   | 9   |
| SMMPA07064 | 12 | 17 | 13 | 25  | 30  | 21  | 19  | 14  | 24  |
| SMMPA07065 | 40 | 26 | 27 | 263 | 232 | 173 | 73  | 99  | 107 |
| SMMPA07066 | 11 | 24 | 10 | 39  | 32  | 37  | 45  | 38  | 38  |
| SMMPA07067 | 30 | 26 | 18 | 170 | 166 | 123 | 76  | 120 | 112 |
| SMMPA07068 | 31 | 36 | 36 | 158 | 125 | 118 | 70  | 97  | 84  |
| SMMPA07069 | 21 | 22 | 15 | 20  | 34  | 39  | 26  | 30  | 35  |
| SMMPA07070 | 33 | 29 | 34 | 52  | 54  | 44  | 57  | 71  | 66  |
| SMMPA07071 | 16 | 13 | 10 | 36  | 46  | 25  | 32  | 36  | 36  |
| SMMPA07072 | 32 | 30 | 27 | 50  | 53  | 46  | 47  | 77  | 62  |
| SMMPA07073 | 18 | 12 | 14 | 53  | 46  | 37  | 71  | 83  | 82  |
| SMMPA07074 | 25 | 26 | 39 | 176 | 150 | 118 | 140 | 177 | 160 |
| SMMPA07075 | 13 | 18 | 11 | 21  | 20  | 26  | 24  | 43  | 38  |
| SMMPA07076 | 18 | 22 | 23 | 47  | 40  | 36  | 25  | 40  | 35  |
| SMMPA07077 | 21 | 35 | 24 | 31  | 29  | 26  | 44  | 49  | 33  |
| SMMPA07078 | 11 | 21 | 13 | 22  | 20  | 26  | 16  | 22  | 19  |
| SMMPA07079 | 1  | 0  | 0  | 2   | 2   | 0   | 1   | 0   | 0   |
| SMMPA07080 | 36 | 27 | 30 | 30  | 33  | 26  | 38  | 47  | 38  |
| SMMPA07081 | 12 | 20 | 15 | 16  | 15  | 14  | 17  | 14  | 18  |
| SMMPA07082 | 14 | 21 | 23 | 41  | 25  | 26  | 29  | 30  | 27  |
| SMMPA07083 | 20 | 14 | 12 | 11  | 24  | 16  | 13  | 24  | 22  |
| SMMPA07084 | 13 | 12 | 15 | 14  | 18  | 11  | 12  | 15  | 19  |
| SMMPA07085 | 7  | 9  | 10 | 21  | 18  | 24  | 18  | 10  | 22  |
| SMMPA07086 | 16 | 10 | 8  | 26  | 25  | 34  | 34  | 43  | 45  |
| SMMPA07087 | 26 | 19 | 18 | 26  | 16  | 21  | 16  | 37  | 37  |
| SMMPA07088 | 16 | 24 | 21 | 40  | 33  | 34  | 27  | 48  | 43  |
| SMMPA07089 | 21 | 21 | 19 | 43  | 27  | 24  | 31  | 39  | 45  |
| SMMPA07090 | 23 | 30 | 11 | 183 | 172 | 146 | 73  | 110 | 92  |
| SMMPA07091 | 22 | 32 | 22 | 306 | 254 | 206 | 113 | 195 | 138 |
| SMMPA07092 | 26 | 20 | 30 | 289 | 245 | 232 | 82  | 129 | 115 |
| SMMPA07093 | 17 | 26 | 23 | 158 | 133 | 105 | 61  | 100 | 87  |
| SMMPA07094 | 24 | 29 | 32 | 551 | 497 | 441 | 264 | 282 | 303 |
| SMMPA07095 | 9  | 5  | 7  | 67  | 70  | 48  | 29  | 34  | 32  |
| SMMPA07096 | 26 | 21 | 29 | 287 | 236 | 196 | 103 | 140 | 123 |

|            |    |    |    |     |     |     |     |     |     |
|------------|----|----|----|-----|-----|-----|-----|-----|-----|
| SMMPA07097 | 15 | 15 | 13 | 86  | 77  | 52  | 29  | 38  | 50  |
| SMMPA07098 | 34 | 46 | 23 | 103 | 92  | 78  | 50  | 59  | 58  |
| SMMPA07099 | 36 | 47 | 27 | 409 | 423 | 347 | 290 | 375 | 312 |
| SMMPA07100 | 24 | 24 | 23 | 15  | 20  | 20  | 18  | 21  | 23  |
| SMMPA07101 | 28 | 19 | 13 | 19  | 14  | 11  | 29  | 31  | 40  |
| SMMPA07102 | 14 | 19 | 14 | 34  | 37  | 30  | 19  | 25  | 25  |
| SMMPA07103 | 16 | 15 | 16 | 10  | 17  | 20  | 14  | 21  | 22  |
| SMMPA07104 | 17 | 21 | 18 | 63  | 61  | 62  | 35  | 45  | 39  |
| SMMPA07105 | 14 | 18 | 12 | 27  | 26  | 18  | 23  | 36  | 45  |
| SMMPA07106 | 91 | 90 | 99 | 81  | 72  | 77  | 66  | 108 | 94  |
| SMMPA07107 | 33 | 31 | 22 | 95  | 78  | 58  | 54  | 61  | 66  |
| SMMPA07108 | 26 | 25 | 33 | 72  | 86  | 70  | 50  | 52  | 44  |
| SMMPA07109 | 19 | 13 | 11 | 73  | 56  | 54  | 30  | 37  | 33  |
| SMMPA07110 | 22 | 22 | 17 | 72  | 61  | 55  | 30  | 54  | 41  |
| SMMPA07111 | 22 | 25 | 20 | 101 | 95  | 72  | 62  | 94  | 70  |
| SMMPA07112 | 12 | 13 | 10 | 53  | 65  | 45  | 32  | 28  | 42  |
| SMMPA07113 | 12 | 9  | 9  | 61  | 37  | 41  | 33  | 72  | 64  |
| SMMPA07114 | 28 | 18 | 19 | 273 | 219 | 179 | 110 | 174 | 158 |
| SMMPA07115 | 14 | 16 | 23 | 78  | 78  | 53  | 32  | 45  | 35  |
| SMMPA07116 | 15 | 11 | 15 | 30  | 27  | 25  | 18  | 27  | 28  |
| SMMPA07117 | 22 | 24 | 24 | 80  | 70  | 82  | 49  | 54  | 45  |
| SMMPA07118 | 17 | 27 | 22 | 58  | 54  | 39  | 46  | 42  | 35  |
| SMMPA07119 | 8  | 12 | 11 | 44  | 51  | 27  | 22  | 32  | 39  |
| SMMPA07120 | 19 | 18 | 24 | 78  | 68  | 61  | 36  | 55  | 45  |
| SMMPA07121 | 10 | 10 | 5  | 16  | 16  | 20  | 15  | 19  | 14  |
| SMMPA07122 | 10 | 22 | 13 | 152 | 109 | 89  | 41  | 62  | 65  |
| SMMPA07123 | 21 | 18 | 14 | 44  | 33  | 27  | 38  | 26  | 34  |
| SMMPA07124 | 52 | 75 | 62 | 106 | 77  | 74  | 57  | 86  | 68  |
| SMMPA07125 | 39 | 43 | 36 | 105 | 89  | 72  | 45  | 85  | 53  |
| SMMPA07126 | 26 | 22 | 16 | 80  | 48  | 38  | 33  | 42  | 41  |
| SMMPA07127 | 21 | 20 | 21 | 18  | 19  | 25  | 18  | 15  | 22  |
| SMMPA07128 | 14 | 21 | 14 | 33  | 22  | 21  | 22  | 32  | 32  |
| SMMPA07129 | 25 | 24 | 27 | 128 | 133 | 94  | 70  | 101 | 76  |
| SMMPA07130 | 8  | 4  | 3  | 35  | 29  | 33  | 23  | 30  | 31  |
| SMMPA07131 | 30 | 24 | 24 | 119 | 114 | 73  | 50  | 55  | 65  |
| SMMPA07132 | 16 | 26 | 12 | 133 | 121 | 111 | 62  | 99  | 64  |
| SMMPA07133 | 17 | 14 | 21 | 42  | 42  | 36  | 28  | 50  | 35  |
| SMMPA07134 | 15 | 11 | 8  | 35  | 41  | 54  | 21  | 31  | 34  |
| SMMPA07135 | 11 | 12 | 13 | 55  | 66  | 37  | 25  | 23  | 42  |
| SMMPA07136 | 16 | 14 | 21 | 95  | 76  | 76  | 53  | 66  | 60  |
| SMMPA07137 | 14 | 12 | 8  | 17  | 14  | 12  | 17  | 15  | 21  |

|            |    |    |    |     |     |     |     |     |     |
|------------|----|----|----|-----|-----|-----|-----|-----|-----|
| SMMPA07138 | 16 | 16 | 11 | 170 | 175 | 146 | 78  | 87  | 65  |
| SMMPA07139 | 18 | 13 | 11 | 228 | 208 | 167 | 160 | 202 | 180 |
| SMMPA07140 | 6  | 5  | 3  | 12  | 11  | 12  | 13  | 12  | 11  |
| SMMPA07141 | 5  | 13 | 8  | 9   | 12  | 14  | 10  | 11  | 14  |
| SMMPA07142 | 4  | 9  | 8  | 64  | 52  | 36  | 37  | 31  | 48  |
| SMMPA07143 | 13 | 19 | 13 | 38  | 37  | 22  | 22  | 33  | 29  |
| SMMPA07144 | 15 | 19 | 30 | 87  | 82  | 73  | 60  | 78  | 69  |
| SMMPA07145 | 9  | 7  | 5  | 6   | 9   | 13  | 7   | 9   | 20  |
| SMMPA07146 | 5  | 8  | 8  | 12  | 14  | 16  | 8   | 11  | 17  |
| SMMPA07147 | 21 | 18 | 13 | 25  | 23  | 15  | 18  | 27  | 29  |
| SMMPA07148 | 13 | 8  | 9  | 325 | 288 | 278 | 74  | 107 | 75  |
| SMMPA07149 | 9  | 3  | 11 | 34  | 44  | 41  | 37  | 32  | 47  |
| SMMPA07150 | 26 | 19 | 20 | 100 | 104 | 66  | 50  | 61  | 42  |
| SMMPA07151 | 11 | 14 | 14 | 78  | 65  | 59  | 25  | 53  | 49  |
| SMMPA07152 | 7  | 15 | 10 | 39  | 31  | 38  | 18  | 33  | 25  |
| SMMPA07153 | 4  | 2  | 2  | 1   | 1   | 1   | 2   | 4   | 2   |
| SMMPA07154 | 28 | 37 | 23 | 172 | 200 | 145 | 94  | 145 | 124 |
| SMMPA07155 | 6  | 5  | 7  | 27  | 15  | 15  | 13  | 15  | 13  |
| SMMPA07156 | 14 | 11 | 8  | 44  | 44  | 29  | 20  | 17  | 19  |
| SMMPA07157 | 18 | 21 | 17 | 41  | 49  | 45  | 24  | 40  | 29  |
| SMMPA07158 | 15 | 9  | 9  | 51  | 54  | 38  | 34  | 25  | 30  |
| SMMPA07159 | 10 | 14 | 7  | 17  | 17  | 10  | 16  | 20  | 25  |
| SMMPA07160 | 8  | 13 | 7  | 88  | 87  | 61  | 59  | 74  | 74  |
| SMMPA07161 | 16 | 21 | 13 | 55  | 48  | 45  | 46  | 63  | 36  |
| SMMPA07162 | 26 | 37 | 27 | 38  | 38  | 31  | 36  | 53  | 32  |
| SMMPA07163 | 15 | 24 | 8  | 27  | 21  | 15  | 21  | 26  | 28  |
| SMMPA07164 | 10 | 18 | 16 | 17  | 29  | 19  | 20  | 17  | 20  |
| SMMPA07165 | 45 | 34 | 26 | 123 | 123 | 86  | 61  | 97  | 72  |
| SMMPA07166 | 15 | 16 | 12 | 35  | 31  | 36  | 21  | 46  | 33  |
| SMMPA07167 | 20 | 16 | 11 | 30  | 19  | 18  | 27  | 29  | 17  |
| SMMPA07168 | 3  | 11 | 7  | 1   | 3   | 3   | 10  | 14  | 10  |
| SMMPA07169 | 14 | 19 | 10 | 25  | 17  | 16  | 13  | 16  | 16  |
| SMMPA07170 | 22 | 28 | 20 | 24  | 21  | 25  | 16  | 31  | 24  |
| SMMPA07171 | 11 | 16 | 6  | 37  | 41  | 28  | 11  | 20  | 10  |
| SMMPA07172 | 34 | 41 | 29 | 225 | 218 | 152 | 102 | 162 | 120 |
| SMMPA07173 | 9  | 12 | 10 | 102 | 75  | 67  | 45  | 58  | 55  |
| SMMPA07174 | 9  | 10 | 8  | 130 | 158 | 106 | 86  | 102 | 106 |
| SMMPA07175 | 20 | 33 | 28 | 456 | 361 | 326 | 278 | 409 | 351 |
| SMMPA07176 | 30 | 28 | 19 | 252 | 260 | 196 | 161 | 189 | 187 |
| SMMPA07177 | 25 | 25 | 21 | 51  | 43  | 31  | 33  | 19  | 30  |
| SMMPA07178 | 18 | 25 | 23 | 175 | 153 | 140 | 129 | 159 | 168 |



|            |    |    |    |     |     |     |     |     |     |
|------------|----|----|----|-----|-----|-----|-----|-----|-----|
| SMMPA07179 | 15 | 16 | 8  | 31  | 33  | 23  | 19  | 17  | 23  |
| SMMPA07180 | 59 | 43 | 31 | 52  | 41  | 34  | 27  | 55  | 41  |
| SMMPA07181 | 6  | 8  | 5  | 4   | 3   | 5   | 8   | 21  | 11  |
| SMMPA07182 | 19 | 9  | 9  | 24  | 15  | 14  | 14  | 18  | 12  |
| SMMPA07183 | 26 | 23 | 15 | 40  | 37  | 16  | 28  | 32  | 29  |
| SMMPA07184 | 16 | 20 | 17 | 109 | 97  | 70  | 53  | 64  | 60  |
| SMMPA07185 | 26 | 10 | 13 | 10  | 14  | 8   | 24  | 23  | 22  |
| SMMPA07186 | 22 | 27 | 26 | 58  | 43  | 32  | 36  | 46  | 45  |
| SMMPA07187 | 35 | 22 | 24 | 37  | 33  | 34  | 34  | 31  | 44  |
| SMMPA07188 | 9  | 12 | 6  | 141 | 146 | 102 | 82  | 94  | 104 |
| SMMPA07189 | 28 | 36 | 22 | 642 | 606 | 553 | 357 | 462 | 429 |
| SMMPA07190 | 13 | 14 | 11 | 265 | 197 | 223 | 63  | 96  | 78  |
| SMMPA07191 | 13 | 6  | 15 | 427 | 420 | 371 | 182 | 246 | 234 |
| SMMPA07192 | 13 | 11 | 16 | 263 | 217 | 200 | 50  | 86  | 83  |
| SMMPA07193 | 26 | 20 | 13 | 439 | 417 | 374 | 260 | 377 | 316 |
| SMMPA07194 | 13 | 7  | 14 | 72  | 57  | 61  | 29  | 25  | 25  |
| SMMPA07195 | 47 | 45 | 47 | 150 | 137 | 103 | 84  | 124 | 107 |
| SMMPA07196 | 20 | 27 | 25 | 38  | 36  | 43  | 30  | 28  | 37  |
| SMMPA07197 | 26 | 32 | 29 | 65  | 47  | 51  | 43  | 50  | 40  |
| SMMPA07198 | 14 | 17 | 13 | 69  | 38  | 55  | 60  | 66  | 81  |
| SMMPA07199 | 34 | 26 | 32 | 33  | 32  | 43  | 30  | 54  | 41  |
| SMMPA07200 | 35 | 39 | 37 | 194 | 203 | 160 | 88  | 88  | 101 |
| SMMPA07201 | 32 | 26 | 27 | 170 | 176 | 103 | 67  | 90  | 88  |
| SMMPA07202 | 19 | 16 | 18 | 101 | 97  | 75  | 47  | 59  | 39  |
| SMMPA07203 | 15 | 18 | 8  | 100 | 105 | 88  | 32  | 52  | 34  |
| SMMPA07204 | 30 | 32 | 24 | 179 | 159 | 112 | 86  | 95  | 87  |
| SMMPA07205 | 24 | 18 | 25 | 205 | 171 | 153 | 76  | 85  | 91  |
| SMMPA07206 | 7  | 11 | 13 | 81  | 62  | 51  | 28  | 30  | 26  |
| SMMPA07207 | 5  | 6  | 3  | 8   | 5   | 8   | 11  | 11  | 10  |
| SMMPA07208 | 36 | 30 | 30 | 57  | 51  | 54  | 53  | 60  | 55  |
| SMMPA07209 | 28 | 39 | 30 | 138 | 125 | 82  | 61  | 83  | 79  |
| SMMPA07210 | 31 | 32 | 19 | 115 | 100 | 75  | 50  | 64  | 71  |
| SMMPA07211 | 17 | 19 | 21 | 131 | 128 | 108 | 78  | 97  | 94  |
| SMMPA07212 | 18 | 18 | 20 | 25  | 14  | 10  | 17  | 32  | 25  |
| SMMPA07213 | 25 | 30 | 22 | 14  | 14  | 16  | 27  | 30  | 29  |
| SMMPA07214 | 32 | 37 | 25 | 29  | 37  | 35  | 55  | 45  | 29  |
| SMMPA07215 | 25 | 35 | 14 | 14  | 16  | 19  | 19  | 30  | 29  |
| SMMPA07216 | 28 | 25 | 20 | 28  | 33  | 26  | 25  | 50  | 52  |
| SMMPA07217 | 20 | 15 | 28 | 24  | 23  | 22  | 21  | 39  | 34  |
| SMMPA07218 | 18 | 17 | 19 | 16  | 14  | 9   | 21  | 31  | 28  |
| SMMPA07219 | 36 | 34 | 31 | 42  | 55  | 30  | 43  | 55  | 53  |

|            |    |    |    |     |     |     |     |     |     |
|------------|----|----|----|-----|-----|-----|-----|-----|-----|
| SMMPA07220 | 33 | 40 | 32 | 56  | 44  | 58  | 46  | 75  | 54  |
| SMMPA07221 | 45 | 45 | 38 | 43  | 37  | 41  | 35  | 47  | 48  |
| SMMPA07222 | 28 | 21 | 21 | 17  | 14  | 15  | 14  | 25  | 36  |
| SMMPA07223 | 17 | 6  | 22 | 28  | 19  | 26  | 27  | 29  | 27  |
| SMMPA07224 | 18 | 10 | 16 | 14  | 17  | 16  | 30  | 28  | 12  |
| SMMPA07225 | 22 | 23 | 16 | 42  | 41  | 49  | 24  | 41  | 38  |
| SMMPA07226 | 14 | 14 | 10 | 60  | 48  | 36  | 27  | 32  | 27  |
| SMMPA07227 | 16 | 11 | 8  | 66  | 76  | 60  | 35  | 28  | 28  |
| SMMPA07228 | 17 | 27 | 28 | 65  | 80  | 42  | 27  | 60  | 51  |
| SMMPA07229 | 18 | 18 | 20 | 35  | 39  | 20  | 28  | 31  | 30  |
| SMMPA07230 | 35 | 19 | 33 | 75  | 75  | 64  | 43  | 63  | 53  |
| SMMPA07231 | 17 | 16 | 9  | 37  | 36  | 28  | 23  | 25  | 19  |
| SMMPA07232 | 17 | 13 | 12 | 60  | 42  | 47  | 33  | 43  | 39  |
| SMMPA07233 | 17 | 19 | 17 | 89  | 63  | 44  | 46  | 49  | 62  |
| SMMPA07234 | 12 | 16 | 8  | 39  | 27  | 26  | 27  | 28  | 26  |
| SMMPA07235 | 24 | 21 | 31 | 65  | 66  | 53  | 46  | 64  | 54  |
| SMMPA07236 | 25 | 26 | 30 | 84  | 87  | 63  | 61  | 89  | 85  |
| SMMPA07237 | 16 | 14 | 16 | 44  | 32  | 33  | 30  | 23  | 33  |
| SMMPA07238 | 27 | 27 | 20 | 95  | 59  | 60  | 64  | 78  | 52  |
| SMMPA07239 | 12 | 11 | 8  | 24  | 23  | 11  | 22  | 17  | 25  |
| SMMPA07240 | 28 | 34 | 26 | 55  | 40  | 29  | 57  | 79  | 54  |
| SMMPA07241 | 16 | 5  | 13 | 35  | 37  | 36  | 28  | 34  | 35  |
| SMMPA07242 | 22 | 28 | 23 | 29  | 40  | 22  | 34  | 35  | 49  |
| SMMPA07243 | 21 | 19 | 15 | 66  | 66  | 47  | 32  | 31  | 38  |
| SMMPA07244 | 15 | 16 | 12 | 30  | 36  | 16  | 21  | 29  | 36  |
| SMMPA07245 | 11 | 19 | 12 | 41  | 51  | 28  | 29  | 38  | 29  |
| SMMPA07246 | 18 | 22 | 16 | 43  | 16  | 31  | 40  | 41  | 35  |
| SMMPA07247 | 5  | 6  | 7  | 14  | 16  | 10  | 16  | 13  | 14  |
| SMMPA07248 | 22 | 19 | 19 | 49  | 52  | 36  | 40  | 36  | 46  |
| SMMPA07249 | 0  | 0  | 0  | 3   | 0   | 1   | 0   | 1   | 1   |
| SMMPA07250 | 21 | 24 | 11 | 347 | 340 | 252 | 144 | 192 | 164 |
| SMMPA07251 | 19 | 17 | 13 | 255 | 245 | 221 | 88  | 134 | 119 |
| SMMPA07252 | 10 | 9  | 7  | 172 | 168 | 162 | 42  | 56  | 46  |
| SMMPA07253 | 16 | 21 | 27 | 74  | 60  | 81  | 51  | 63  | 72  |
| SMMPA07254 | 15 | 18 | 13 | 60  | 41  | 33  | 21  | 39  | 37  |
| SMMPA07255 | 11 | 3  | 12 | 55  | 44  | 38  | 20  | 24  | 29  |
| SMMPA07256 | 12 | 7  | 12 | 40  | 34  | 29  | 32  | 26  | 19  |
| SMMPA07257 | 19 | 27 | 19 | 82  | 48  | 48  | 39  | 51  | 52  |
| SMMPA07258 | 18 | 8  | 9  | 116 | 88  | 56  | 75  | 106 | 99  |
| SMMPA07259 | 22 | 23 | 18 | 37  | 24  | 26  | 28  | 31  | 31  |
| SMMPA07260 | 10 | 13 | 8  | 13  | 12  | 11  | 10  | 13  | 20  |

|            |    |    |    |     |     |     |     |     |     |
|------------|----|----|----|-----|-----|-----|-----|-----|-----|
| SMMPA07261 | 7  | 4  | 6  | 8   | 11  | 9   | 10  | 16  | 17  |
| SMMPA07262 | 8  | 10 | 12 | 18  | 10  | 11  | 9   | 19  | 19  |
| SMMPA07263 | 57 | 64 | 59 | 50  | 41  | 46  | 47  | 69  | 56  |
| SMMPA07264 | 3  | 4  | 9  | 2   | 2   | 2   | 3   | 2   | 3   |
| SMMPA07265 | 33 | 40 | 24 | 24  | 15  | 21  | 39  | 38  | 44  |
| SMMPA07266 | 9  | 10 | 6  | 6   | 9   | 5   | 13  | 19  | 15  |
| SMMPA07267 | 35 | 38 | 25 | 243 | 236 | 182 | 143 | 214 | 154 |
| SMMPA07268 | 17 | 17 | 13 | 117 | 113 | 93  | 47  | 56  | 36  |
| SMMPA07269 | 8  | 15 | 19 | 29  | 42  | 50  | 22  | 34  | 31  |
| SMMPA07270 | 11 | 12 | 9  | 146 | 130 | 107 | 45  | 70  | 69  |
| SMMPA07271 | 19 | 16 | 19 | 37  | 45  | 31  | 20  | 33  | 37  |
| SMMPA07272 | 22 | 19 | 27 | 25  | 24  | 21  | 15  | 29  | 27  |
| SMMPA07273 | 18 | 23 | 12 | 123 | 114 | 88  | 54  | 61  | 49  |
| SMMPA07274 | 25 | 20 | 16 | 168 | 131 | 124 | 57  | 79  | 65  |
| SMMPA07275 | 23 | 18 | 25 | 57  | 61  | 49  | 32  | 35  | 25  |
| SMMPA07276 | 22 | 15 | 18 | 23  | 13  | 16  | 20  | 18  | 19  |
| SMMPA07277 | 23 | 20 | 20 | 44  | 48  | 34  | 31  | 29  | 22  |
| SMMPA07278 | 10 | 10 | 6  | 8   | 10  | 6   | 7   | 7   | 14  |
| SMMPA07279 | 27 | 41 | 31 | 18  | 14  | 15  | 21  | 21  | 20  |
| SMMPA07280 | 34 | 29 | 29 | 80  | 77  | 61  | 93  | 93  | 110 |
| SMMPA07281 | 67 | 59 | 53 | 102 | 95  | 73  | 64  | 79  | 64  |
| SMMPA07282 | 63 | 83 | 61 | 81  | 105 | 75  | 55  | 75  | 103 |
| SMMPA07283 | 26 | 45 | 28 | 74  | 48  | 53  | 85  | 74  | 87  |
| SMMPA07284 | 22 | 23 | 14 | 36  | 45  | 21  | 14  | 34  | 28  |
| SMMPA07285 | 48 | 54 | 30 | 56  | 31  | 41  | 40  | 43  | 46  |
| SMMPA07286 | 33 | 43 | 37 | 77  | 79  | 71  | 56  | 83  | 64  |
| SMMPA07287 | 30 | 26 | 30 | 85  | 78  | 53  | 50  | 71  | 61  |
| SMMPA07288 | 38 | 39 | 30 | 292 | 260 | 212 | 168 | 267 | 238 |
| SMMPA07289 | 9  | 19 | 13 | 114 | 96  | 83  | 49  | 62  | 60  |
| SMMPA07290 | 17 | 16 | 11 | 305 | 271 | 231 | 105 | 151 | 147 |
| SMMPA07291 | 15 | 18 | 27 | 107 | 72  | 59  | 49  | 64  | 74  |
| SMMPA07292 | 13 | 9  | 12 | 52  | 64  | 44  | 43  | 39  | 42  |
| SMMPA07293 | 14 | 7  | 19 | 45  | 44  | 41  | 33  | 45  | 32  |
| SMMPA07294 | 11 | 6  | 5  | 93  | 68  | 48  | 38  | 46  | 33  |
| SMMPA07295 | 17 | 25 | 11 | 107 | 76  | 56  | 45  | 65  | 60  |
| SMMPA07296 | 5  | 2  | 4  | 54  | 48  | 40  | 26  | 33  | 30  |
| SMMPA07297 | 16 | 17 | 18 | 357 | 302 | 223 | 142 | 157 | 156 |
| SMMPA07298 | 32 | 36 | 26 | 694 | 668 | 556 | 245 | 358 | 351 |
| SMMPA07299 | 24 | 25 | 23 | 139 | 126 | 109 | 74  | 77  | 81  |
| SMMPA07300 | 31 | 37 | 29 | 62  | 56  | 47  | 33  | 49  | 55  |
| SMMPA07301 | 46 | 44 | 32 | 72  | 58  | 49  | 49  | 60  | 56  |

|            |    |    |    |     |     |     |     |     |     |
|------------|----|----|----|-----|-----|-----|-----|-----|-----|
| SMMPA07302 | 31 | 28 | 37 | 34  | 46  | 27  | 31  | 35  | 48  |
| SMMPA07303 | 20 | 27 | 25 | 35  | 26  | 31  | 25  | 24  | 21  |
| SMMPA07304 | 23 | 21 | 26 | 21  | 16  | 18  | 32  | 35  | 30  |
| SMMPA07305 | 37 | 23 | 22 | 56  | 48  | 45  | 44  | 52  | 59  |
| SMMPA07306 | 37 | 47 | 43 | 76  | 58  | 47  | 64  | 69  | 67  |
| SMMPA07307 | 31 | 32 | 30 | 55  | 60  | 43  | 40  | 47  | 43  |
| SMMPA07308 | 32 | 34 | 20 | 80  | 61  | 67  | 51  | 60  | 41  |
| SMMPA07309 | 27 | 32 | 17 | 55  | 51  | 41  | 27  | 42  | 35  |
| SMMPA07310 | 39 | 31 | 33 | 56  | 59  | 36  | 43  | 59  | 61  |
| SMMPA07311 | 20 | 16 | 21 | 326 | 293 | 240 | 180 | 240 | 212 |
| SMMPA07312 | 21 | 19 | 17 | 347 | 304 | 281 | 166 | 197 | 176 |
| SMMPA07313 | 25 | 35 | 28 | 375 | 365 | 295 | 192 | 262 | 243 |
| SMMPA07314 | 11 | 9  | 14 | 85  | 86  | 82  | 51  | 62  | 66  |
| SMMPA07315 | 14 | 17 | 12 | 70  | 70  | 44  | 45  | 84  | 65  |
| SMMPA07316 | 6  | 10 | 11 | 36  | 33  | 18  | 11  | 24  | 25  |
| SMMPA07317 | 26 | 14 | 16 | 33  | 20  | 29  | 16  | 30  | 35  |
| SMMPA07318 | 17 | 18 | 16 | 48  | 31  | 40  | 24  | 37  | 29  |
| SMMPA07319 | 22 | 37 | 26 | 68  | 71  | 51  | 48  | 62  | 43  |
| SMMPA07320 | 40 | 33 | 26 | 32  | 36  | 29  | 42  | 49  | 47  |
| SMMPA07321 | 20 | 23 | 19 | 68  | 68  | 46  | 33  | 38  | 51  |
| SMMPA07322 | 13 | 19 | 17 | 44  | 36  | 46  | 41  | 50  | 40  |
| SMMPA07323 | 23 | 22 | 27 | 122 | 107 | 81  | 70  | 77  | 71  |
| SMMPA07324 | 19 | 22 | 16 | 38  | 43  | 43  | 45  | 50  | 48  |
| SMMPA07325 | 7  | 9  | 7  | 7   | 7   | 11  | 9   | 15  | 14  |
| SMMPA07326 | 15 | 17 | 11 | 17  | 19  | 14  | 10  | 20  | 15  |
| SMMPA07327 | 3  | 9  | 4  | 170 | 134 | 111 | 112 | 149 | 133 |
| SMMPA07328 | 24 | 21 | 21 | 211 | 183 | 127 | 128 | 220 | 197 |
| SMMPA07329 | 11 | 7  | 9  | 126 | 122 | 111 | 119 | 130 | 97  |
| SMMPA07330 | 41 | 45 | 26 | 575 | 516 | 415 | 450 | 600 | 542 |
| SMMPA07331 | 27 | 29 | 15 | 177 | 177 | 135 | 152 | 173 | 170 |
| SMMPA07332 | 26 | 29 | 24 | 231 | 203 | 168 | 143 | 162 | 170 |
| SMMPA07333 | 24 | 27 | 29 | 146 | 122 | 94  | 97  | 144 | 144 |
| SMMPA07334 | 26 | 29 | 26 | 88  | 78  | 68  | 97  | 107 | 93  |
| SMMPA07335 | 27 | 19 | 31 | 316 | 301 | 254 | 109 | 137 | 126 |
| SMMPA07336 | 19 | 24 | 20 | 35  | 27  | 23  | 29  | 35  | 25  |
| SMMPA07337 | 11 | 7  | 14 | 64  | 63  | 56  | 26  | 54  | 45  |
| SMMPA07338 | 24 | 25 | 22 | 67  | 61  | 40  | 47  | 59  | 53  |
| SMMPA07339 | 25 | 27 | 26 | 23  | 30  | 21  | 27  | 37  | 40  |
| SMMPA07340 | 5  | 13 | 15 | 21  | 25  | 12  | 16  | 27  | 32  |
| SMMPA07341 | 13 | 16 | 12 | 26  | 26  | 22  | 20  | 30  | 21  |
| SMMPA07342 | 15 | 13 | 18 | 19  | 20  | 18  | 13  | 24  | 11  |

|            |    |    |    |     |     |     |     |     |     |
|------------|----|----|----|-----|-----|-----|-----|-----|-----|
| SMMPA07343 | 13 | 21 | 9  | 33  | 40  | 38  | 28  | 23  | 30  |
| SMMPA07344 | 27 | 26 | 29 | 539 | 503 | 434 | 284 | 366 | 326 |
| SMMPA07345 | 17 | 31 | 28 | 177 | 158 | 136 | 62  | 97  | 92  |
| SMMPA07346 | 20 | 12 | 16 | 117 | 102 | 107 | 64  | 69  | 79  |
| SMMPA07347 | 53 | 61 | 45 | 59  | 58  | 56  | 48  | 72  | 44  |
| SMMPA07348 | 32 | 34 | 29 | 29  | 27  | 30  | 38  | 39  | 40  |
| SMMPA07349 | 22 | 11 | 18 | 35  | 34  | 35  | 14  | 30  | 26  |
| SMMPA07350 | 23 | 23 | 13 | 82  | 70  | 50  | 53  | 74  | 64  |
| SMMPA07351 | 42 | 45 | 43 | 63  | 46  | 51  | 46  | 65  | 58  |
| SMMPA07352 | 29 | 29 | 18 | 713 | 631 | 579 | 274 | 349 | 324 |
| SMMPA07353 | 16 | 30 | 12 | 212 | 231 | 154 | 115 | 130 | 120 |
| SMMPA07354 | 25 | 17 | 20 | 127 | 94  | 88  | 62  | 49  | 65  |
| SMMPA07355 | 3  | 0  | 2  | 21  | 41  | 37  | 17  | 14  | 18  |
| SMMPA07356 | 19 | 15 | 9  | 22  | 29  | 16  | 30  | 36  | 36  |
| SMMPA07357 | 9  | 3  | 7  | 6   | 16  | 13  | 17  | 17  | 14  |
| SMMPA07358 | 11 | 11 | 10 | 28  | 32  | 23  | 21  | 39  | 41  |
| SMMPA07359 | 20 | 14 | 7  | 49  | 23  | 26  | 36  | 39  | 26  |
| SMMPA07360 | 6  | 5  | 4  | 11  | 12  | 7   | 8   | 11  | 8   |
| SMMPA07361 | 38 | 47 | 38 | 53  | 61  | 54  | 41  | 68  | 59  |
| SMMPA07362 | 24 | 24 | 25 | 212 | 209 | 169 | 140 | 177 | 174 |
| SMMPA07363 | 11 | 14 | 11 | 37  | 45  | 31  | 21  | 26  | 27  |
| SMMPA07364 | 35 | 37 | 30 | 168 | 130 | 121 | 83  | 119 | 104 |
| SMMPA07365 | 15 | 20 | 13 | 44  | 30  | 28  | 30  | 40  | 44  |
| SMMPA07366 | 35 | 34 | 15 | 56  | 53  | 65  | 32  | 40  | 53  |
| SMMPA07367 | 3  | 3  | 4  | 44  | 40  | 28  | 17  | 26  | 22  |
| SMMPA07368 | 18 | 24 | 13 | 332 | 295 | 228 | 101 | 122 | 122 |
| SMMPA07369 | 11 | 12 | 25 | 107 | 78  | 73  | 45  | 59  | 68  |
| SMMPA07370 | 10 | 7  | 8  | 45  | 35  | 23  | 26  | 21  | 23  |
| SMMPA07371 | 15 | 14 | 21 | 51  | 42  | 42  | 31  | 25  | 30  |
| SMMPA07372 | 14 | 11 | 16 | 96  | 67  | 69  | 35  | 57  | 43  |
| SMMPA07373 | 0  | 4  | 5  | 35  | 28  | 32  | 18  | 26  | 22  |
| SMMPA07374 | 17 | 18 | 19 | 153 | 107 | 115 | 78  | 89  | 70  |
| SMMPA07375 | 39 | 29 | 26 | 70  | 52  | 58  | 34  | 59  | 55  |
| SMMPA07376 | 8  | 8  | 8  | 28  | 19  | 23  | 13  | 15  | 17  |
| SMMPA07377 | 22 | 18 | 15 | 46  | 44  | 43  | 39  | 36  | 40  |
| SMMPA07378 | 25 | 27 | 26 | 99  | 92  | 65  | 54  | 58  | 65  |
| SMMPA07379 | 6  | 8  | 8  | 11  | 9   | 13  | 6   | 7   | 3   |
| SMMPA07380 | 41 | 37 | 36 | 85  | 81  | 55  | 37  | 54  | 66  |
| SMMPA07381 | 26 | 27 | 17 | 145 | 113 | 80  | 99  | 134 | 111 |
| SMMPA07382 | 25 | 17 | 17 | 275 | 280 | 213 | 173 | 223 | 246 |
| SMMPA07383 | 23 | 17 | 18 | 45  | 34  | 29  | 38  | 45  | 40  |

|            |    |    |    |     |     |     |     |     |     |
|------------|----|----|----|-----|-----|-----|-----|-----|-----|
| SMMPA07384 | 15 | 29 | 14 | 48  | 37  | 37  | 32  | 51  | 57  |
| SMMPA07385 | 16 | 24 | 16 | 89  | 104 | 72  | 73  | 118 | 97  |
| SMMPA07386 | 11 | 4  | 3  | 16  | 7   | 7   | 7   | 8   | 9   |
| SMMPA07387 | 5  | 8  | 5  | 20  | 16  | 9   | 14  | 20  | 16  |
| SMMPA07388 | 13 | 22 | 15 | 59  | 62  | 46  | 23  | 37  | 28  |
| SMMPA07389 | 19 | 18 | 22 | 57  | 40  | 40  | 25  | 32  | 46  |
| SMMPA07390 | 15 | 8  | 10 | 16  | 12  | 12  | 13  | 14  | 11  |
| SMMPA07391 | 39 | 39 | 28 | 41  | 48  | 35  | 50  | 64  | 69  |
| SMMPA07392 | 30 | 19 | 18 | 31  | 22  | 33  | 26  | 32  | 43  |
| SMMPA07393 | 11 | 20 | 13 | 50  | 44  | 30  | 26  | 29  | 43  |
| SMMPA07394 | 17 | 29 | 18 | 129 | 97  | 91  | 59  | 73  | 69  |
| SMMPA07395 | 34 | 47 | 33 | 149 | 117 | 87  | 80  | 83  | 79  |
| SMMPA07396 | 45 | 45 | 44 | 138 | 105 | 108 | 72  | 98  | 91  |
| SMMPA07397 | 9  | 8  | 9  | 51  | 46  | 43  | 30  | 42  | 39  |
| SMMPA07398 | 41 | 52 | 36 | 121 | 102 | 71  | 70  | 79  | 90  |
| SMMPA07399 | 29 | 31 | 26 | 102 | 86  | 106 | 43  | 65  | 52  |
| SMMPA07400 | 8  | 12 | 14 | 15  | 17  | 18  | 10  | 10  | 16  |
| SMMPA07401 | 21 | 21 | 27 | 56  | 55  | 61  | 38  | 50  | 53  |
| SMMPA07402 | 23 | 29 | 30 | 110 | 96  | 71  | 66  | 73  | 89  |
| SMMPA07403 | 26 | 12 | 14 | 25  | 24  | 9   | 19  | 18  | 26  |
| SMMPA07404 | 41 | 30 | 30 | 80  | 55  | 57  | 42  | 43  | 40  |
| SMMPA07405 | 12 | 17 | 14 | 19  | 17  | 27  | 29  | 23  | 28  |
| SMMPA07406 | 21 | 17 | 29 | 28  | 33  | 32  | 16  | 33  | 20  |
| SMMPA07407 | 21 | 14 | 18 | 45  | 35  | 25  | 10  | 29  | 18  |
| SMMPA07408 | 27 | 32 | 32 | 195 | 138 | 118 | 73  | 94  | 86  |
| SMMPA07409 | 78 | 52 | 59 | 375 | 360 | 248 | 149 | 221 | 202 |
| SMMPA07410 | 30 | 44 | 42 | 185 | 170 | 150 | 104 | 134 | 138 |
| SMMPA07411 | 25 | 22 | 15 | 146 | 124 | 96  | 44  | 77  | 77  |
| SMMPA07412 | 46 | 40 | 39 | 22  | 24  | 23  | 35  | 55  | 59  |
| SMMPA07413 | 42 | 49 | 23 | 378 | 357 | 276 | 175 | 234 | 228 |
| SMMPA07414 | 11 | 15 | 18 | 33  | 24  | 15  | 25  | 29  | 17  |
| SMMPA07415 | 42 | 29 | 27 | 51  | 44  | 51  | 66  | 63  | 72  |
| SMMPA07416 | 43 | 42 | 35 | 38  | 30  | 36  | 35  | 55  | 58  |
| SMMPA07417 | 29 | 31 | 26 | 60  | 64  | 54  | 49  | 64  | 45  |
| SMMPA07418 | 18 | 15 | 13 | 28  | 21  | 19  | 35  | 30  | 31  |
| SMMPA07419 | 20 | 20 | 22 | 37  | 33  | 33  | 31  | 43  | 28  |
| SMMPA07420 | 26 | 20 | 29 | 63  | 58  | 49  | 38  | 47  | 53  |
| SMMPA07421 | 29 | 18 | 19 | 22  | 32  | 27  | 41  | 36  | 36  |
| SMMPA07422 | 27 | 19 | 17 | 37  | 30  | 34  | 24  | 35  | 41  |
| SMMPA07423 | 20 | 27 | 26 | 25  | 19  | 27  | 42  | 43  | 36  |
| SMMPA07424 | 21 | 23 | 19 | 25  | 26  | 33  | 22  | 28  | 44  |

|            |    |    |    |     |     |     |     |     |     |
|------------|----|----|----|-----|-----|-----|-----|-----|-----|
| SMMPA07425 | 15 | 22 | 18 | 36  | 22  | 34  | 17  | 25  | 29  |
| SMMPA07426 | 24 | 21 | 20 | 49  | 45  | 25  | 38  | 61  | 51  |
| SMMPA07427 | 22 | 23 | 17 | 20  | 28  | 36  | 12  | 33  | 14  |
| SMMPA07428 | 51 | 62 | 46 | 85  | 76  | 82  | 67  | 94  | 92  |
| SMMPA07429 | 42 | 47 | 27 | 117 | 116 | 69  | 59  | 100 | 77  |
| SMMPA07430 | 29 | 35 | 28 | 91  | 68  | 69  | 47  | 72  | 64  |
| SMMPA07431 | 34 | 39 | 37 | 123 | 111 | 78  | 64  | 87  | 89  |
| SMMPA07432 | 27 | 22 | 23 | 32  | 23  | 40  | 30  | 40  | 25  |
| SMMPA07433 | 19 | 18 | 17 | 29  | 27  | 26  | 28  | 36  | 44  |
| SMMPA07434 | 13 | 8  | 10 | 45  | 47  | 39  | 23  | 33  | 19  |
| SMMPA07435 | 17 | 22 | 24 | 31  | 26  | 32  | 27  | 25  | 42  |
| SMMPA07436 | 26 | 16 | 13 | 19  | 17  | 15  | 23  | 17  | 28  |
| SMMPA07437 | 30 | 28 | 31 | 113 | 87  | 87  | 41  | 53  | 57  |
| SMMPA07438 | 32 | 53 | 28 | 102 | 81  | 62  | 63  | 87  | 60  |
| SMMPA07439 | 60 | 41 | 39 | 163 | 101 | 92  | 77  | 107 | 88  |
| SMMPA07440 | 12 | 10 | 12 | 23  | 23  | 16  | 15  | 23  | 31  |
| SMMPA07441 | 15 | 12 | 11 | 6   | 5   | 6   | 13  | 18  | 13  |
| SMMPA07442 | 24 | 25 | 13 | 27  | 23  | 25  | 20  | 23  | 26  |
| SMMPA07443 | 11 | 16 | 15 | 55  | 37  | 45  | 36  | 55  | 40  |
| SMMPA07444 | 19 | 19 | 18 | 37  | 45  | 25  | 27  | 39  | 41  |
| SMMPA07445 | 31 | 30 | 24 | 113 | 85  | 67  | 52  | 76  | 73  |
| SMMPA07446 | 5  | 9  | 11 | 15  | 23  | 22  | 15  | 23  | 22  |
| SMMPA07447 | 9  | 4  | 11 | 58  | 49  | 41  | 32  | 36  | 38  |
| SMMPA07448 | 13 | 13 | 13 | 493 | 445 | 456 | 203 | 267 | 241 |
| SMMPA07449 | 9  | 10 | 7  | 238 | 233 | 253 | 109 | 149 | 132 |
| SMMPA07450 | 37 | 30 | 21 | 483 | 445 | 373 | 160 | 219 | 184 |
| SMMPA07451 | 8  | 11 | 12 | 195 | 160 | 133 | 66  | 101 | 78  |
| SMMPA07452 | 13 | 11 | 14 | 315 | 323 | 276 | 121 | 165 | 140 |
| SMMPA07453 | 6  | 12 | 15 | 80  | 50  | 53  | 24  | 28  | 30  |
| SMMPA07454 | 17 | 22 | 12 | 80  | 86  | 60  | 42  | 43  | 47  |
| SMMPA07455 | 3  | 4  | 7  | 42  | 43  | 39  | 15  | 28  | 16  |
| SMMPA07456 | 24 | 22 | 36 | 465 | 395 | 374 | 167 | 237 | 241 |
| SMMPA07457 | 10 | 13 | 13 | 205 | 150 | 141 | 80  | 83  | 71  |
| SMMPA07458 | 14 | 13 | 15 | 14  | 13  | 17  | 12  | 26  | 16  |
| SMMPA07459 | 25 | 16 | 11 | 14  | 10  | 16  | 25  | 29  | 30  |
| SMMPA07460 | 18 | 19 | 14 | 32  | 32  | 24  | 22  | 27  | 20  |
| SMMPA07461 | 21 | 21 | 21 | 89  | 100 | 63  | 40  | 48  | 52  |
| SMMPA07462 | 19 | 18 | 12 | 41  | 36  | 36  | 26  | 25  | 26  |
| SMMPA07463 | 11 | 10 | 6  | 67  | 60  | 28  | 21  | 32  | 27  |
| SMMPA07464 | 27 | 24 | 23 | 55  | 50  | 48  | 36  | 57  | 51  |
| SMMPA07465 | 52 | 47 | 45 | 255 | 235 | 183 | 95  | 162 | 134 |

|            |    |    |    |     |     |     |     |     |     |
|------------|----|----|----|-----|-----|-----|-----|-----|-----|
| SMMPA07466 | 21 | 25 | 28 | 143 | 121 | 102 | 53  | 89  | 89  |
| SMMPA07467 | 19 | 19 | 13 | 27  | 45  | 20  | 23  | 29  | 36  |
| SMMPA07468 | 13 | 14 | 14 | 63  | 79  | 54  | 37  | 29  | 37  |
| SMMPA07469 | 11 | 8  | 9  | 178 | 198 | 150 | 53  | 71  | 50  |
| SMMPA07470 | 14 | 9  | 17 | 101 | 85  | 72  | 59  | 72  | 61  |
| SMMPA07471 | 26 | 29 | 33 | 25  | 29  | 32  | 26  | 46  | 39  |
| SMMPA07472 | 26 | 20 | 8  | 29  | 21  | 17  | 21  | 16  | 18  |
| SMMPA07473 | 15 | 18 | 23 | 29  | 18  | 28  | 29  | 29  | 21  |
| SMMPA07474 | 11 | 11 | 15 | 29  | 35  | 17  | 22  | 22  | 18  |
| SMMPA07475 | 19 | 23 | 25 | 513 | 542 | 467 | 215 | 299 | 283 |
| SMMPA07476 | 10 | 13 | 13 | 157 | 164 | 122 | 74  | 104 | 74  |
| SMMPA07477 | 18 | 25 | 22 | 194 | 205 | 167 | 96  | 111 | 71  |
| SMMPA07478 | 13 | 12 | 14 | 72  | 61  | 53  | 28  | 51  | 37  |
| SMMPA07479 | 28 | 19 | 12 | 315 | 297 | 281 | 125 | 193 | 130 |
| SMMPA07480 | 15 | 10 | 8  | 215 | 159 | 143 | 91  | 114 | 75  |
| SMMPA07481 | 17 | 19 | 14 | 37  | 28  | 28  | 23  | 37  | 36  |
| SMMPA07482 | 34 | 34 | 42 | 91  | 80  | 69  | 50  | 62  | 78  |
| SMMPA07483 | 38 | 37 | 30 | 61  | 48  | 40  | 46  | 56  | 53  |
| SMMPA07484 | 16 | 18 | 21 | 22  | 21  | 19  | 33  | 30  | 44  |
| SMMPA07485 | 37 | 34 | 15 | 82  | 76  | 62  | 55  | 52  | 47  |
| SMMPA07486 | 18 | 28 | 25 | 25  | 23  | 34  | 17  | 36  | 29  |
| SMMPA07487 | 21 | 23 | 18 | 116 | 100 | 76  | 66  | 75  | 72  |
| SMMPA07488 | 15 | 17 | 21 | 52  | 49  | 38  | 33  | 43  | 35  |
| SMMPA07489 | 16 | 18 | 16 | 150 | 133 | 118 | 57  | 93  | 68  |
| SMMPA07490 | 8  | 10 | 7  | 26  | 23  | 21  | 14  | 20  | 16  |
| SMMPA07491 | 20 | 14 | 15 | 109 | 102 | 62  | 42  | 57  | 48  |
| SMMPA07492 | 4  | 4  | 6  | 11  | 10  | 11  | 9   | 11  | 13  |
| SMMPA07493 | 11 | 7  | 13 | 39  | 47  | 28  | 25  | 23  | 19  |
| SMMPA07494 | 17 | 18 | 23 | 31  | 25  | 18  | 16  | 26  | 14  |
| SMMPA07495 | 14 | 8  | 15 | 25  | 21  | 20  | 20  | 24  | 33  |
| SMMPA07496 | 14 | 9  | 11 | 15  | 12  | 21  | 21  | 22  | 17  |
| SMMPA07497 | 15 | 16 | 17 | 67  | 59  | 50  | 28  | 37  | 38  |
| SMMPA07498 | 24 | 31 | 20 | 107 | 105 | 65  | 72  | 76  | 69  |
| SMMPA07499 | 33 | 26 | 30 | 45  | 46  | 34  | 26  | 36  | 42  |
| SMMPA07500 | 20 | 15 | 29 | 76  | 67  | 49  | 48  | 44  | 47  |
| SMMPA07501 | 15 | 9  | 6  | 61  | 54  | 42  | 24  | 34  | 21  |
| SMMPA07502 | 9  | 14 | 14 | 72  | 74  | 41  | 20  | 31  | 40  |
| SMMPA07503 | 29 | 18 | 14 | 68  | 74  | 58  | 36  | 45  | 48  |
| SMMPA07504 | 57 | 61 | 44 | 59  | 56  | 49  | 71  | 91  | 97  |
| SMMPA07505 | 65 | 74 | 65 | 322 | 276 | 250 | 252 | 341 | 314 |
| SMMPA07506 | 19 | 10 | 16 | 52  | 47  | 38  | 25  | 32  | 30  |



|            |    |    |    |     |     |     |     |     |     |
|------------|----|----|----|-----|-----|-----|-----|-----|-----|
| SMMPA07507 | 18 | 25 | 22 | 207 | 216 | 183 | 98  | 152 | 98  |
| SMMPA07508 | 16 | 19 | 10 | 29  | 21  | 20  | 23  | 30  | 17  |
| SMMPA07509 | 10 | 10 | 9  | 15  | 14  | 14  | 10  | 23  | 18  |
| SMMPA07510 | 14 | 12 | 13 | 46  | 42  | 32  | 32  | 38  | 38  |
| SMMPA07511 | 7  | 5  | 4  | 49  | 37  | 24  | 20  | 28  | 20  |
| SMMPA07512 | 18 | 14 | 9  | 17  | 19  | 15  | 21  | 23  | 25  |
| SMMPA07513 | 10 | 17 | 7  | 119 | 105 | 98  | 47  | 63  | 50  |
| SMMPA07514 | 17 | 27 | 17 | 126 | 122 | 92  | 48  | 62  | 40  |
| SMMPA07515 | 24 | 23 | 19 | 42  | 32  | 38  | 29  | 37  | 32  |
| SMMPA07516 | 22 | 14 | 17 | 50  | 45  | 41  | 26  | 44  | 39  |
| SMMPA07517 | 16 | 13 | 5  | 111 | 81  | 55  | 41  | 45  | 55  |
| SMMPA07518 | 22 | 26 | 27 | 25  | 22  | 18  | 33  | 37  | 35  |
| SMMPA07519 | 6  | 21 | 18 | 57  | 53  | 55  | 36  | 49  | 41  |
| SMMPA07520 | 37 | 22 | 25 | 29  | 32  | 38  | 26  | 53  | 51  |
| SMMPA07521 | 7  | 10 | 6  | 8   | 7   | 13  | 8   | 17  | 14  |
| SMMPA07522 | 19 | 13 | 21 | 31  | 31  | 24  | 29  | 35  | 34  |
| SMMPA07523 | 23 | 28 | 19 | 44  | 33  | 25  | 26  | 54  | 37  |
| SMMPA07524 | 36 | 49 | 41 | 49  | 53  | 37  | 58  | 43  | 69  |
| SMMPA07525 | 12 | 7  | 12 | 8   | 11  | 6   | 14  | 13  | 23  |
| SMMPA07526 | 6  | 15 | 14 | 12  | 13  | 11  | 17  | 10  | 14  |
| SMMPA07527 | 25 | 28 | 26 | 41  | 32  | 26  | 41  | 70  | 53  |
| SMMPA07528 | 13 | 12 | 15 | 24  | 24  | 14  | 14  | 14  | 25  |
| SMMPA07529 | 5  | 10 | 9  | 6   | 6   | 14  | 9   | 21  | 13  |
| SMMPA07530 | 20 | 18 | 25 | 22  | 28  | 20  | 26  | 24  | 37  |
| SMMPA07531 | 7  | 2  | 2  | 13  | 11  | 8   | 15  | 13  | 19  |
| SMMPA07532 | 15 | 6  | 11 | 26  | 40  | 26  | 26  | 34  | 29  |
| SMMPA07533 | 7  | 13 | 8  | 22  | 19  | 23  | 25  | 35  | 21  |
| SMMPA07534 | 14 | 18 | 8  | 48  | 36  | 45  | 39  | 49  | 39  |
| SMMPA07535 | 18 | 25 | 19 | 47  | 29  | 43  | 40  | 59  | 57  |
| SMMPA07536 | 26 | 14 | 18 | 44  | 41  | 30  | 52  | 48  | 64  |
| SMMPA07537 | 31 | 33 | 26 | 459 | 463 | 333 | 209 | 279 | 307 |
| SMMPA07538 | 23 | 25 | 21 | 100 | 112 | 64  | 61  | 63  | 55  |
| SMMPA07539 | 1  | 3  | 3  | 8   | 3   | 1   | 1   | 7   | 5   |
| SMMPA07540 | 23 | 26 | 16 | 23  | 20  | 26  | 30  | 48  | 40  |
| SMMPA07541 | 25 | 16 | 18 | 80  | 69  | 57  | 31  | 39  | 33  |
| SMMPA07542 | 16 | 14 | 17 | 214 | 212 | 201 | 73  | 87  | 56  |
| SMMPA07543 | 8  | 7  | 4  | 19  | 15  | 14  | 12  | 17  | 17  |
| SMMPA07544 | 23 | 23 | 14 | 32  | 43  | 38  | 24  | 26  | 38  |
| SMMPA07545 | 22 | 20 | 18 | 84  | 93  | 69  | 34  | 47  | 36  |
| SMMPA07546 | 36 | 28 | 37 | 157 | 156 | 102 | 66  | 68  | 98  |
| SMMPA07547 | 16 | 24 | 13 | 46  | 34  | 25  | 25  | 43  | 37  |

|            |    |    |    |     |     |     |     |     |     |
|------------|----|----|----|-----|-----|-----|-----|-----|-----|
| SMMPA07548 | 21 | 13 | 13 | 50  | 50  | 25  | 46  | 49  | 58  |
| SMMPA07549 | 5  | 6  | 9  | 36  | 35  | 43  | 33  | 44  | 25  |
| SMMPA07550 | 15 | 27 | 15 | 156 | 125 | 92  | 50  | 65  | 63  |
| SMMPA07551 | 6  | 16 | 12 | 281 | 252 | 176 | 103 | 123 | 109 |
| SMMPA07552 | 11 | 12 | 7  | 76  | 87  | 45  | 37  | 52  | 37  |
| SMMPA07553 | 8  | 4  | 1  | 3   | 4   | 2   | 5   | 9   | 1   |
| SMMPA07554 | 7  | 4  | 3  | 2   | 4   | 4   | 3   | 7   | 6   |
| SMMPA07555 | 10 | 10 | 8  | 28  | 24  | 16  | 14  | 17  | 24  |
| SMMPA07556 | 17 | 19 | 15 | 96  | 74  | 65  | 35  | 41  | 32  |
| SMMPA07557 | 23 | 13 | 15 | 16  | 15  | 10  | 22  | 23  | 25  |
| SMMPA07558 | 5  | 6  | 2  | 8   | 7   | 5   | 7   | 15  | 17  |
| SMMPA07559 | 8  | 16 | 13 | 27  | 25  | 26  | 26  | 38  | 23  |
| SMMPA07560 | 19 | 30 | 18 | 39  | 43  | 45  | 30  | 58  | 48  |
| SMMPA07561 | 9  | 7  | 7  | 40  | 34  | 35  | 37  | 30  | 17  |
| SMMPA07562 | 10 | 6  | 6  | 27  | 22  | 13  | 13  | 32  | 32  |
| SMMPA07563 | 25 | 13 | 27 | 32  | 32  | 47  | 39  | 65  | 48  |
| SMMPA07564 | 30 | 29 | 36 | 83  | 66  | 66  | 52  | 57  | 60  |
| SMMPA07565 | 20 | 10 | 17 | 34  | 17  | 38  | 10  | 21  | 25  |
| SMMPA07566 | 24 | 20 | 19 | 36  | 37  | 50  | 40  | 49  | 39  |
| SMMPA07567 | 31 | 36 | 19 | 74  | 68  | 80  | 41  | 80  | 53  |
| SMMPA07568 | 17 | 16 | 15 | 26  | 16  | 26  | 19  | 27  | 18  |
| SMMPA07569 | 19 | 23 | 18 | 38  | 38  | 30  | 23  | 34  | 47  |
| SMMPA07570 | 20 | 19 | 12 | 46  | 48  | 46  | 26  | 27  | 17  |
| SMMPA07571 | 18 | 19 | 19 | 47  | 41  | 39  | 41  | 34  | 37  |
| SMMPA07572 | 16 | 11 | 24 | 27  | 22  | 23  | 25  | 32  | 28  |
| SMMPA07573 | 10 | 19 | 10 | 43  | 28  | 21  | 25  | 44  | 37  |
| SMMPA07574 | 12 | 9  | 17 | 11  | 18  | 23  | 18  | 22  | 31  |
| SMMPA07575 | 19 | 13 | 8  | 33  | 35  | 31  | 35  | 35  | 38  |
| SMMPA07576 | 20 | 24 | 26 | 27  | 25  | 19  | 24  | 25  | 22  |
| SMMPA07577 | 8  | 12 | 5  | 51  | 38  | 32  | 24  | 37  | 34  |
| SMMPA07578 | 25 | 28 | 24 | 99  | 72  | 53  | 45  | 69  | 56  |
| SMMPA07579 | 23 | 29 | 26 | 84  | 85  | 61  | 48  | 58  | 57  |
| SMMPA07580 | 20 | 23 | 20 | 59  | 69  | 45  | 47  | 50  | 45  |
| SMMPA07581 | 16 | 20 | 13 | 49  | 66  | 47  | 30  | 32  | 31  |
| SMMPA07582 | 16 | 19 | 13 | 60  | 49  | 44  | 38  | 51  | 45  |
| SMMPA07583 | 22 | 13 | 17 | 19  | 14  | 25  | 33  | 36  | 36  |
| SMMPA07584 | 11 | 12 | 9  | 49  | 43  | 30  | 19  | 25  | 20  |
| SMMPA07585 | 10 | 13 | 16 | 103 | 159 | 126 | 59  | 65  | 48  |
| SMMPA07586 | 4  | 5  | 6  | 11  | 18  | 10  | 6   | 6   | 5   |
| SMMPA07587 | 21 | 14 | 14 | 45  | 42  | 20  | 23  | 28  | 29  |
| SMMPA07588 | 22 | 26 | 19 | 33  | 39  | 29  | 40  | 56  | 48  |

|            |    |    |    |     |     |     |     |     |     |
|------------|----|----|----|-----|-----|-----|-----|-----|-----|
| SMMPA07589 | 26 | 23 | 29 | 57  | 55  | 39  | 36  | 44  | 48  |
| SMMPA07590 | 26 | 23 | 19 | 40  | 36  | 26  | 29  | 33  | 36  |
| SMMPA07591 | 27 | 24 | 20 | 60  | 70  | 60  | 54  | 75  | 59  |
| SMMPA07592 | 21 | 15 | 23 | 43  | 52  | 40  | 14  | 33  | 26  |
| SMMPA07593 | 23 | 36 | 25 | 25  | 44  | 27  | 23  | 34  | 38  |
| SMMPA07594 | 16 | 15 | 21 | 30  | 30  | 20  | 26  | 24  | 31  |
| SMMPA07595 | 15 | 6  | 9  | 22  | 21  | 13  | 23  | 28  | 18  |
| SMMPA07596 | 16 | 14 | 15 | 23  | 32  | 27  | 18  | 24  | 29  |
| SMMPA07597 | 32 | 26 | 21 | 69  | 45  | 42  | 32  | 54  | 38  |
| SMMPA07598 | 20 | 21 | 18 | 76  | 54  | 58  | 51  | 59  | 62  |
| SMMPA07599 | 25 | 12 | 18 | 20  | 19  | 23  | 29  | 32  | 36  |
| SMMPA07600 | 26 | 26 | 21 | 24  | 26  | 27  | 22  | 29  | 31  |
| SMMPA07601 | 13 | 8  | 8  | 63  | 52  | 46  | 42  | 54  | 39  |
| SMMPA07602 | 7  | 11 | 13 | 31  | 30  | 23  | 13  | 20  | 15  |
| SMMPA07603 | 42 | 34 | 33 | 29  | 26  | 38  | 17  | 43  | 35  |
| SMMPA07604 | 19 | 19 | 15 | 32  | 42  | 22  | 27  | 29  | 33  |
| SMMPA07605 | 30 | 24 | 28 | 55  | 48  | 42  | 43  | 53  | 59  |
| SMMPA07606 | 31 | 37 | 30 | 114 | 118 | 82  | 62  | 64  | 77  |
| SMMPA07607 | 21 | 26 | 15 | 188 | 137 | 126 | 74  | 106 | 100 |
| SMMPA07608 | 57 | 48 | 44 | 392 | 364 | 307 | 213 | 221 | 267 |
| SMMPA07609 | 27 | 38 | 39 | 218 | 174 | 117 | 117 | 133 | 115 |
| SMMPA07610 | 2  | 0  | 5  | 1   | 9   | 5   | 8   | 7   | 4   |
| SMMPA07611 | 18 | 11 | 18 | 25  | 14  | 20  | 31  | 30  | 42  |
| SMMPA07612 | 14 | 18 | 23 | 19  | 20  | 22  | 20  | 20  | 34  |
| SMMPA07613 | 30 | 27 | 25 | 42  | 34  | 26  | 43  | 42  | 47  |
| SMMPA07614 | 25 | 27 | 23 | 36  | 23  | 25  | 32  | 48  | 46  |
| SMMPA07615 | 35 | 39 | 27 | 536 | 523 | 402 | 270 | 295 | 316 |
| SMMPA07616 | 26 | 34 | 30 | 40  | 43  | 38  | 48  | 49  | 54  |
| SMMPA07617 | 9  | 11 | 6  | 9   | 8   | 3   | 9   | 15  | 5   |
| SMMPA07618 | 13 | 18 | 15 | 18  | 18  | 20  | 39  | 42  | 32  |
| SMMPA07619 | 7  | 16 | 12 | 18  | 7   | 17  | 28  | 26  | 35  |
| SMMPA07620 | 14 | 12 | 19 | 23  | 23  | 19  | 20  | 22  | 25  |
| SMMPA07621 | 20 | 18 | 15 | 18  | 21  | 12  | 16  | 21  | 25  |
| SMMPA07622 | 21 | 29 | 18 | 34  | 19  | 19  | 24  | 25  | 38  |
| SMMPA07623 | 15 | 17 | 11 | 19  | 20  | 18  | 12  | 31  | 23  |
| SMMPA07624 | 14 | 7  | 9  | 13  | 8   | 13  | 16  | 19  | 20  |
| SMMPA07625 | 14 | 9  | 14 | 19  | 18  | 14  | 23  | 23  | 25  |
| SMMPA07626 | 5  | 10 | 7  | 9   | 3   | 9   | 5   | 6   | 11  |
| SMMPA07627 | 11 | 22 | 21 | 13  | 18  | 21  | 13  | 18  | 18  |
| SMMPA07628 | 27 | 24 | 21 | 38  | 33  | 25  | 20  | 44  | 26  |
| SMMPA07629 | 32 | 28 | 35 | 27  | 30  | 39  | 36  | 45  | 65  |

|            |    |    |    |     |     |     |     |     |     |
|------------|----|----|----|-----|-----|-----|-----|-----|-----|
| SMMPA07630 | 26 | 20 | 24 | 29  | 20  | 25  | 32  | 49  | 46  |
| SMMPA07631 | 50 | 38 | 36 | 48  | 45  | 46  | 49  | 63  | 38  |
| SMMPA07632 | 28 | 23 | 28 | 48  | 32  | 29  | 41  | 53  | 49  |
| SMMPA07633 | 40 | 44 | 38 | 50  | 43  | 44  | 55  | 59  | 81  |
| SMMPA07634 | 32 | 38 | 25 | 51  | 27  | 24  | 38  | 36  | 57  |
| SMMPA07635 | 38 | 30 | 24 | 32  | 27  | 39  | 25  | 63  | 35  |
| SMMPA07636 | 33 | 35 | 25 | 43  | 49  | 52  | 48  | 54  | 48  |
| SMMPA07637 | 21 | 33 | 28 | 29  | 30  | 29  | 45  | 54  | 60  |
| SMMPA07638 | 10 | 17 | 8  | 157 | 143 | 132 | 87  | 133 | 111 |
| SMMPA07639 | 22 | 27 | 30 | 439 | 404 | 339 | 171 | 229 | 201 |
| SMMPA07640 | 17 | 27 | 21 | 373 | 340 | 281 | 146 | 202 | 199 |
| SMMPA07641 | 23 | 37 | 31 | 372 | 363 | 278 | 183 | 227 | 261 |
| SMMPA07642 | 21 | 33 | 19 | 344 | 283 | 270 | 148 | 166 | 174 |
| SMMPA07643 | 20 | 17 | 18 | 312 | 255 | 220 | 109 | 150 | 127 |
| SMMPA07644 | 23 | 23 | 17 | 46  | 31  | 21  | 22  | 19  | 31  |
| SMMPA07645 | 28 | 17 | 19 | 160 | 115 | 97  | 66  | 102 | 72  |
| SMMPA07646 | 19 | 20 | 16 | 81  | 82  | 59  | 20  | 47  | 36  |
| SMMPA07647 | 14 | 9  | 24 | 94  | 95  | 77  | 45  | 54  | 34  |
| SMMPA07648 | 20 | 18 | 14 | 52  | 52  | 44  | 33  | 32  | 38  |
| SMMPA07649 | 29 | 15 | 21 | 79  | 82  | 60  | 36  | 58  | 42  |
| SMMPA07650 | 20 | 29 | 29 | 93  | 94  | 73  | 40  | 73  | 64  |
| SMMPA07651 | 18 | 38 | 21 | 37  | 50  | 36  | 30  | 39  | 48  |
| SMMPA07652 | 30 | 34 | 36 | 67  | 47  | 40  | 49  | 46  | 57  |
| SMMPA07653 | 59 | 66 | 64 | 64  | 32  | 62  | 75  | 87  | 91  |
| SMMPA07654 | 23 | 23 | 28 | 18  | 20  | 17  | 26  | 35  | 28  |
| SMMPA07655 | 35 | 25 | 24 | 36  | 29  | 32  | 28  | 33  | 29  |
| SMMPA07656 | 54 | 47 | 42 | 36  | 28  | 38  | 44  | 53  | 54  |
| SMMPA07657 | 6  | 3  | 7  | 7   | 4   | 7   | 14  | 7   | 5   |
| SMMPA07658 | 23 | 34 | 22 | 35  | 39  | 35  | 44  | 62  | 54  |
| SMMPA07659 | 6  | 6  | 6  | 10  | 4   | 7   | 9   | 17  | 27  |
| SMMPA07660 | 10 | 13 | 17 | 23  | 14  | 14  | 38  | 38  | 39  |
| SMMPA07661 | 14 | 18 | 10 | 25  | 26  | 22  | 16  | 36  | 27  |
| SMMPA07662 | 6  | 12 | 5  | 6   | 13  | 5   | 14  | 11  | 9   |
| SMMPA07663 | 21 | 24 | 22 | 47  | 56  | 49  | 27  | 41  | 34  |
| SMMPA07664 | 25 | 34 | 24 | 74  | 73  | 65  | 43  | 64  | 51  |
| SMMPA07665 | 24 | 22 | 20 | 67  | 64  | 50  | 35  | 40  | 44  |
| SMMPA07666 | 22 | 20 | 20 | 29  | 23  | 19  | 29  | 37  | 32  |
| SMMPA07667 | 22 | 32 | 29 | 93  | 89  | 57  | 40  | 54  | 59  |
| SMMPA07668 | 8  | 8  | 22 | 22  | 21  | 23  | 22  | 23  | 18  |
| SMMPA07669 | 30 | 37 | 33 | 33  | 37  | 41  | 44  | 50  | 31  |
| SMMPA07670 | 13 | 12 | 15 | 13  | 24  | 13  | 14  | 16  | 20  |

|            |    |    |    |     |     |     |     |     |     |
|------------|----|----|----|-----|-----|-----|-----|-----|-----|
| SMMPA07671 | 20 | 19 | 30 | 21  | 30  | 20  | 23  | 32  | 39  |
| SMMPA07672 | 46 | 37 | 37 | 80  | 73  | 72  | 63  | 115 | 77  |
| SMMPA07673 | 19 | 16 | 18 | 42  | 38  | 33  | 20  | 27  | 27  |
| SMMPA07674 | 20 | 30 | 28 | 34  | 16  | 23  | 29  | 41  | 24  |
| SMMPA07675 | 17 | 28 | 19 | 18  | 22  | 24  | 18  | 24  | 34  |
| SMMPA07676 | 29 | 34 | 27 | 96  | 77  | 58  | 61  | 51  | 53  |
| SMMPA07677 | 13 | 11 | 12 | 93  | 95  | 71  | 16  | 25  | 31  |
| SMMPA07678 | 23 | 25 | 14 | 66  | 59  | 50  | 30  | 50  | 45  |
| SMMPA07679 | 10 | 9  | 9  | 11  | 9   | 10  | 14  | 17  | 29  |
| SMMPA07680 | 2  | 0  | 2  | 7   | 1   | 2   | 5   | 9   | 3   |
| SMMPA07681 | 19 | 28 | 21 | 203 | 250 | 176 | 105 | 153 | 143 |
| SMMPA07682 | 38 | 41 | 34 | 45  | 34  | 33  | 38  | 37  | 40  |
| SMMPA07683 | 9  | 15 | 12 | 165 | 156 | 116 | 107 | 117 | 100 |
| SMMPA07684 | 21 | 18 | 10 | 92  | 72  | 51  | 40  | 50  | 55  |
| SMMPA07685 | 20 | 23 | 27 | 57  | 51  | 61  | 38  | 41  | 31  |
| SMMPA07686 | 26 | 23 | 16 | 336 | 329 | 304 | 163 | 247 | 186 |
| SMMPA07687 | 32 | 25 | 29 | 571 | 508 | 427 | 311 | 346 | 315 |
| SMMPA07688 | 19 | 17 | 15 | 520 | 458 | 433 | 238 | 287 | 267 |
| SMMPA07689 | 8  | 4  | 7  | 24  | 24  | 21  | 21  | 14  | 26  |
| SMMPA07690 | 15 | 15 | 12 | 48  | 37  | 39  | 20  | 26  | 29  |
| SMMPA07691 | 14 | 20 | 25 | 64  | 52  | 49  | 41  | 63  | 62  |
| SMMPA07692 | 22 | 16 | 18 | 78  | 78  | 71  | 41  | 58  | 51  |
| SMMPA07693 | 38 | 39 | 30 | 95  | 103 | 73  | 53  | 66  | 78  |
| SMMPA07694 | 7  | 9  | 6  | 13  | 19  | 18  | 13  | 15  | 13  |
| SMMPA07695 | 35 | 39 | 35 | 75  | 69  | 69  | 51  | 80  | 83  |
| SMMPA07696 | 35 | 27 | 26 | 168 | 151 | 136 | 79  | 113 | 85  |
| SMMPA07697 | 24 | 30 | 34 | 108 | 135 | 118 | 41  | 81  | 43  |
| SMMPA07698 | 12 | 4  | 17 | 17  | 23  | 11  | 22  | 32  | 41  |
| SMMPA07699 | 27 | 34 | 35 | 42  | 36  | 32  | 66  | 84  | 91  |
| SMMPA07700 | 9  | 7  | 12 | 11  | 11  | 15  | 15  | 28  | 28  |
| SMMPA07701 | 41 | 32 | 27 | 188 | 134 | 131 | 70  | 118 | 92  |
| SMMPA07702 | 18 | 11 | 6  | 53  | 45  | 52  | 27  | 36  | 37  |
| SMMPA07703 | 27 | 30 | 21 | 140 | 94  | 87  | 78  | 85  | 90  |
| SMMPA07704 | 13 | 15 | 20 | 33  | 30  | 25  | 14  | 23  | 22  |
| SMMPA07705 | 13 | 9  | 7  | 15  | 15  | 13  | 1   | 23  | 16  |
| SMMPA07706 | 7  | 13 | 18 | 29  | 27  | 6   | 18  | 19  | 8   |
| SMMPA07707 | 16 | 13 | 17 | 104 | 87  | 78  | 57  | 72  | 69  |
| SMMPA07708 | 3  | 3  | 4  | 1   | 5   | 4   | 4   | 4   | 7   |
| SMMPA07709 | 15 | 15 | 19 | 39  | 35  | 26  | 19  | 28  | 19  |
| SMMPA07710 | 43 | 52 | 29 | 157 | 153 | 107 | 119 | 123 | 128 |
| SMMPA07711 | 23 | 22 | 26 | 104 | 110 | 96  | 61  | 87  | 105 |

|            |    |    |    |     |     |     |     |     |     |
|------------|----|----|----|-----|-----|-----|-----|-----|-----|
| SMMPA07712 | 3  | 7  | 6  | 20  | 6   | 11  | 7   | 12  | 15  |
| SMMPA07713 | 17 | 20 | 7  | 20  | 22  | 13  | 21  | 16  | 17  |
| SMMPA07714 | 19 | 17 | 20 | 18  | 21  | 22  | 22  | 26  | 35  |
| SMMPA07715 | 18 | 21 | 15 | 28  | 23  | 22  | 39  | 45  | 43  |
| SMMPA07716 | 20 | 22 | 17 | 35  | 23  | 24  | 40  | 32  | 42  |
| SMMPA07717 | 33 | 57 | 37 | 81  | 93  | 59  | 68  | 83  | 60  |
| SMMPA07718 | 36 | 27 | 27 | 379 | 321 | 271 | 139 | 195 | 184 |
| SMMPA07719 | 29 | 29 | 19 | 377 | 349 | 285 | 160 | 204 | 204 |
| SMMPA07720 | 23 | 22 | 25 | 137 | 108 | 101 | 55  | 68  | 71  |
| SMMPA07721 | 15 | 13 | 9  | 35  | 40  | 31  | 21  | 24  | 23  |
| SMMPA07722 | 27 | 23 | 19 | 390 | 346 | 278 | 140 | 168 | 155 |
| SMMPA07723 | 9  | 7  | 3  | 70  | 81  | 69  | 33  | 55  | 38  |
| SMMPA07724 | 14 | 18 | 16 | 154 | 109 | 112 | 90  | 99  | 88  |
| SMMPA07725 | 26 | 23 | 18 | 325 | 277 | 271 | 108 | 151 | 149 |
| SMMPA07726 | 19 | 21 | 19 | 135 | 137 | 95  | 62  | 94  | 96  |
| SMMPA07727 | 9  | 5  | 11 | 16  | 12  | 15  | 16  | 13  | 12  |
| SMMPA07728 | 33 | 28 | 21 | 71  | 51  | 45  | 49  | 74  | 50  |
| SMMPA07729 | 18 | 13 | 12 | 12  | 17  | 14  | 16  | 24  | 24  |
| SMMPA07730 | 38 | 48 | 38 | 43  | 44  | 33  | 58  | 73  | 79  |
| SMMPA07731 | 20 | 24 | 25 | 20  | 23  | 24  | 21  | 35  | 25  |
| SMMPA07732 | 18 | 24 | 20 | 23  | 17  | 27  | 26  | 33  | 45  |
| SMMPA07733 | 44 | 31 | 33 | 41  | 43  | 35  | 34  | 53  | 46  |
| SMMPA07734 | 15 | 11 | 11 | 65  | 60  | 43  | 31  | 49  | 41  |
| SMMPA07735 | 50 | 63 | 41 | 43  | 54  | 39  | 51  | 49  | 73  |
| SMMPA07736 | 18 | 24 | 10 | 29  | 22  | 21  | 26  | 33  | 21  |
| SMMPA07737 | 13 | 19 | 16 | 19  | 6   | 21  | 21  | 41  | 27  |
| SMMPA07738 | 23 | 27 | 29 | 32  | 31  | 27  | 28  | 36  | 35  |
| SMMPA07739 | 15 | 12 | 12 | 18  | 16  | 15  | 18  | 38  | 32  |
| SMMPA07740 | 19 | 18 | 14 | 129 | 98  | 93  | 52  | 76  | 72  |
| SMMPA07741 | 18 | 24 | 20 | 388 | 324 | 233 | 159 | 213 | 193 |
| SMMPA07742 | 40 | 43 | 28 | 61  | 49  | 40  | 41  | 58  | 53  |
| SMMPA07743 | 16 | 30 | 25 | 50  | 35  | 35  | 30  | 48  | 37  |
| SMMPA07744 | 26 | 15 | 19 | 31  | 26  | 22  | 27  | 28  | 31  |
| SMMPA07745 | 15 | 18 | 23 | 50  | 41  | 40  | 35  | 56  | 57  |
| SMMPA07746 | 26 | 31 | 20 | 59  | 57  | 46  | 38  | 45  | 44  |
| SMMPA07747 | 28 | 42 | 34 | 87  | 70  | 56  | 43  | 60  | 58  |
| SMMPA07748 | 23 | 24 | 17 | 66  | 71  | 53  | 33  | 39  | 35  |
| SMMPA07749 | 29 | 21 | 25 | 55  | 54  | 49  | 38  | 45  | 43  |
| SMMPA07750 | 20 | 24 | 22 | 45  | 49  | 27  | 20  | 28  | 32  |
| SMMPA07751 | 11 | 17 | 10 | 31  | 27  | 32  | 28  | 21  | 34  |
| SMMPA07752 | 68 | 70 | 64 | 134 | 120 | 77  | 99  | 106 | 112 |

|            |    |    |    |     |     |     |    |     |     |
|------------|----|----|----|-----|-----|-----|----|-----|-----|
| SMMPA07753 | 73 | 73 | 64 | 133 | 134 | 142 | 75 | 103 | 112 |
| SMMPA07754 | 41 | 59 | 57 | 49  | 65  | 51  | 53 | 74  | 75  |
| SMMPA07755 | 15 | 26 | 18 | 20  | 28  | 23  | 24 | 25  | 25  |
| SMMPA07756 | 15 | 24 | 11 | 20  | 20  | 20  | 16 | 28  | 30  |
| SMMPA07757 | 17 | 23 | 16 | 29  | 29  | 30  | 29 | 34  | 31  |
| SMMPA07758 | 33 | 25 | 22 | 59  | 60  | 56  | 29 | 54  | 56  |
| SMMPA07759 | 23 | 20 | 25 | 41  | 27  | 20  | 34 | 39  | 32  |
| SMMPA07760 | 12 | 12 | 19 | 15  | 11  | 23  | 10 | 17  | 14  |
| SMMPA07761 | 18 | 28 | 15 | 38  | 20  | 25  | 21 | 19  | 20  |
| SMMPA07762 | 28 | 22 | 28 | 43  | 43  | 36  | 30 | 48  | 41  |
| SMMPA07763 | 45 | 38 | 44 | 79  | 63  | 68  | 62 | 51  | 61  |
| SMMPA07764 | 42 | 46 | 47 | 105 | 96  | 58  | 62 | 63  | 63  |
| SMMPA07765 | 21 | 28 | 18 | 80  | 84  | 60  | 44 | 44  | 47  |
| SMMPA07766 | 28 | 20 | 22 | 54  | 51  | 44  | 24 | 55  | 48  |
| SMMPA07767 | 5  | 8  | 7  | 38  | 17  | 14  | 14 | 19  | 18  |
| SMMPA07768 | 9  | 12 | 11 | 24  | 25  | 18  | 13 | 21  | 20  |
| SMMPA07769 | 14 | 17 | 9  | 45  | 45  | 44  | 21 | 30  | 34  |
| SMMPA07770 | 15 | 13 | 12 | 52  | 31  | 40  | 28 | 25  | 31  |
| SMMPA07771 | 1  | 6  | 1  | 39  | 38  | 27  | 19 | 14  | 20  |
| SMMPA07772 | 14 | 16 | 8  | 35  | 39  | 23  | 24 | 33  | 29  |
| SMMPA07773 | 23 | 24 | 12 | 61  | 45  | 47  | 27 | 40  | 30  |
| SMMPA07774 | 9  | 3  | 5  | 9   | 9   | 11  | 9  | 6   | 8   |
| SMMPA07775 | 19 | 20 | 26 | 18  | 20  | 15  | 13 | 24  | 26  |
| SMMPA07776 | 18 | 15 | 8  | 41  | 34  | 16  | 19 | 29  | 20  |
| SMMPA07777 | 7  | 2  | 6  | 17  | 11  | 9   | 9  | 11  | 6   |
| SMMPA07778 | 19 | 15 | 11 | 14  | 23  | 8   | 13 | 30  | 22  |
| SMMPA07779 | 20 | 12 | 17 | 29  | 21  | 17  | 33 | 28  | 33  |
| SMMPA07780 | 16 | 9  | 16 | 20  | 18  | 20  | 20 | 25  | 22  |
| SMMPA07781 | 23 | 24 | 17 | 26  | 29  | 36  | 33 | 41  | 22  |
| SMMPA07782 | 31 | 29 | 29 | 239 | 223 | 156 | 53 | 73  | 67  |
| SMMPA07783 | 8  | 8  | 9  | 9   | 7   | 12  | 7  | 15  | 6   |
| SMMPA07784 | 22 | 27 | 19 | 20  | 18  | 18  | 30 | 43  | 18  |
| SMMPA07785 | 20 | 17 | 14 | 57  | 69  | 43  | 33 | 41  | 41  |
| SMMPA07786 | 17 | 11 | 17 | 32  | 31  | 28  | 16 | 24  | 24  |
| SMMPA07787 | 6  | 13 | 20 | 112 | 105 | 78  | 52 | 64  | 60  |
| SMMPA07788 | 4  | 5  | 2  | 13  | 33  | 19  | 6  | 11  | 8   |
| SMMPA07789 | 11 | 14 | 17 | 141 | 146 | 124 | 43 | 69  | 60  |
| SMMPA07790 | 21 | 28 | 18 | 67  | 75  | 48  | 27 | 42  | 44  |
| SMMPA07791 | 30 | 32 | 16 | 107 | 89  | 72  | 49 | 73  | 69  |
| SMMPA07792 | 17 | 21 | 13 | 80  | 86  | 82  | 44 | 63  | 57  |
| SMMPA07793 | 23 | 24 | 24 | 27  | 28  | 22  | 30 | 38  | 42  |

|            |    |    |    |     |     |     |     |     |     |
|------------|----|----|----|-----|-----|-----|-----|-----|-----|
| SMMPA07794 | 37 | 44 | 29 | 102 | 111 | 77  | 81  | 110 | 95  |
| SMMPA07795 | 19 | 17 | 18 | 87  | 87  | 69  | 46  | 68  | 61  |
| SMMPA07796 | 25 | 30 | 25 | 53  | 50  | 55  | 49  | 53  | 46  |
| SMMPA07797 | 9  | 26 | 25 | 39  | 53  | 44  | 23  | 30  | 32  |
| SMMPA07798 | 15 | 27 | 13 | 44  | 30  | 47  | 32  | 42  | 45  |
| SMMPA07799 | 53 | 39 | 48 | 49  | 75  | 48  | 50  | 68  | 47  |
| SMMPA07800 | 45 | 30 | 25 | 46  | 49  | 33  | 43  | 55  | 48  |
| SMMPA07801 | 26 | 24 | 23 | 41  | 34  | 29  | 25  | 33  | 31  |
| SMMPA07802 | 18 | 30 | 25 | 22  | 27  | 27  | 20  | 31  | 26  |
| SMMPA07803 | 13 | 5  | 4  | 19  | 20  | 23  | 9   | 10  | 16  |
| SMMPA07804 | 18 | 10 | 10 | 24  | 20  | 37  | 12  | 17  | 16  |
| SMMPA07805 | 21 | 19 | 17 | 31  | 34  | 16  | 24  | 51  | 29  |
| SMMPA07806 | 24 | 21 | 24 | 56  | 57  | 40  | 27  | 35  | 35  |
| SMMPA07807 | 28 | 35 | 35 | 74  | 61  | 54  | 56  | 76  | 76  |
| SMMPA07808 | 10 | 6  | 7  | 24  | 41  | 23  | 15  | 16  | 17  |
| SMMPA07809 | 15 | 6  | 8  | 66  | 72  | 76  | 28  | 39  | 24  |
| SMMPA07810 | 7  | 18 | 10 | 60  | 62  | 57  | 41  | 59  | 47  |
| SMMPA07811 | 22 | 30 | 19 | 109 | 107 | 104 | 58  | 74  | 50  |
| SMMPA07812 | 12 | 11 | 13 | 9   | 20  | 19  | 14  | 12  | 18  |
| SMMPA07813 | 38 | 31 | 28 | 30  | 33  | 36  | 26  | 40  | 27  |
| SMMPA07814 | 32 | 37 | 28 | 490 | 456 | 382 | 204 | 269 | 231 |
| SMMPA07815 | 5  | 11 | 12 | 65  | 75  | 67  | 30  | 39  | 34  |
| SMMPA07816 | 25 | 32 | 26 | 366 | 302 | 211 | 148 | 174 | 151 |
| SMMPA07817 | 15 | 20 | 20 | 111 | 119 | 86  | 53  | 52  | 53  |
| SMMPA07818 | 21 | 18 | 20 | 74  | 61  | 43  | 32  | 55  | 50  |
| SMMPA07819 | 16 | 13 | 6  | 15  | 10  | 19  | 20  | 25  | 24  |
| SMMPA07820 | 14 | 7  | 11 | 10  | 7   | 11  | 11  | 9   | 18  |
| SMMPA07821 | 53 | 69 | 48 | 57  | 57  | 60  | 59  | 58  | 83  |
| SMMPA07822 | 72 | 98 | 91 | 38  | 45  | 49  | 58  | 56  | 77  |
| SMMPA07823 | 57 | 56 | 50 | 43  | 48  | 37  | 51  | 43  | 61  |
| SMMPA07824 | 80 | 68 | 68 | 83  | 71  | 70  | 47  | 80  | 72  |
| SMMPA07825 | 71 | 98 | 73 | 45  | 44  | 51  | 68  | 74  | 89  |
| SMMPA07826 | 60 | 61 | 53 | 46  | 40  | 49  | 36  | 50  | 41  |
| SMMPA07827 | 21 | 28 | 21 | 24  | 34  | 17  | 15  | 20  | 18  |
| SMMPA07828 | 28 | 37 | 31 | 40  | 42  | 49  | 29  | 48  | 30  |
| SMMPA07829 | 35 | 23 | 33 | 31  | 27  | 31  | 30  | 37  | 41  |
| SMMPA07830 | 23 | 26 | 34 | 29  | 32  | 27  | 44  | 46  | 40  |
| SMMPA07831 | 12 | 19 | 15 | 23  | 38  | 25  | 33  | 35  | 24  |
| SMMPA07832 | 12 | 14 | 13 | 25  | 14  | 16  | 16  | 41  | 14  |
| SMMPA07833 | 25 | 23 | 21 | 32  | 18  | 32  | 35  | 43  | 32  |
| SMMPA07834 | 33 | 36 | 30 | 54  | 63  | 48  | 36  | 70  | 48  |



|            |    |    |    |     |     |     |     |     |     |
|------------|----|----|----|-----|-----|-----|-----|-----|-----|
| SMMPA07835 | 33 | 29 | 33 | 49  | 46  | 46  | 46  | 63  | 51  |
| SMMPA07836 | 19 | 10 | 7  | 32  | 14  | 16  | 24  | 24  | 26  |
| SMMPA07837 | 56 | 45 | 43 | 162 | 146 | 111 | 87  | 95  | 92  |
| SMMPA07838 | 29 | 24 | 21 | 115 | 99  | 79  | 50  | 74  | 71  |
| SMMPA07839 | 25 | 19 | 16 | 37  | 41  | 25  | 28  | 34  | 29  |
| SMMPA07840 | 14 | 10 | 6  | 8   | 8   | 24  | 15  | 12  | 15  |
| SMMPA07841 | 18 | 24 | 32 | 30  | 41  | 37  | 30  | 24  | 29  |
| SMMPA07842 | 17 | 31 | 21 | 57  | 51  | 48  | 42  | 55  | 45  |
| SMMPA07843 | 4  | 4  | 7  | 16  | 20  | 25  | 9   | 4   | 5   |
| SMMPA07844 | 5  | 5  | 7  | 7   | 10  | 6   | 5   | 7   | 9   |
| SMMPA07845 | 26 | 30 | 18 | 72  | 80  | 58  | 40  | 61  | 50  |
| SMMPA07846 | 33 | 31 | 27 | 73  | 60  | 60  | 38  | 57  | 51  |
| SMMPA07847 | 28 | 24 | 32 | 41  | 47  | 36  | 39  | 45  | 44  |
| SMMPA07848 | 7  | 13 | 11 | 49  | 56  | 48  | 18  | 14  | 21  |
| SMMPA07849 | 19 | 18 | 19 | 113 | 91  | 73  | 46  | 55  | 40  |
| SMMPA07850 | 8  | 15 | 8  | 70  | 85  | 65  | 40  | 51  | 34  |
| SMMPA07851 | 14 | 11 | 22 | 109 | 71  | 70  | 30  | 53  | 55  |
| SMMPA07852 | 17 | 18 | 16 | 79  | 90  | 71  | 32  | 45  | 37  |
| SMMPA07853 | 24 | 30 | 21 | 55  | 36  | 40  | 41  | 45  | 34  |
| SMMPA07854 | 29 | 22 | 14 | 115 | 104 | 63  | 72  | 66  | 69  |
| SMMPA07855 | 17 | 19 | 11 | 46  | 39  | 36  | 19  | 25  | 45  |
| SMMPA07856 | 29 | 25 | 21 | 40  | 36  | 40  | 23  | 36  | 36  |
| SMMPA07857 | 33 | 27 | 36 | 32  | 23  | 30  | 29  | 46  | 31  |
| SMMPA07858 | 20 | 21 | 23 | 82  | 62  | 48  | 52  | 79  | 82  |
| SMMPA07859 | 24 | 17 | 22 | 64  | 59  | 43  | 35  | 47  | 38  |
| SMMPA07860 | 9  | 15 | 18 | 50  | 41  | 46  | 25  | 27  | 26  |
| SMMPA07861 | 14 | 10 | 5  | 44  | 55  | 35  | 32  | 47  | 37  |
| SMMPA07862 | 10 | 12 | 16 | 86  | 76  | 74  | 38  | 56  | 45  |
| SMMPA07863 | 42 | 36 | 37 | 18  | 33  | 18  | 19  | 33  | 47  |
| SMMPA07864 | 17 | 16 | 17 | 54  | 47  | 42  | 28  | 38  | 32  |
| SMMPA07865 | 6  | 3  | 7  | 11  | 7   | 8   | 10  | 8   | 12  |
| SMMPA07866 | 18 | 8  | 12 | 29  | 37  | 33  | 15  | 30  | 21  |
| SMMPA07867 | 15 | 13 | 5  | 30  | 26  | 33  | 21  | 31  | 24  |
| SMMPA07868 | 18 | 18 | 16 | 16  | 20  | 20  | 15  | 35  | 13  |
| SMMPA07869 | 11 | 9  | 11 | 42  | 24  | 24  | 33  | 36  | 22  |
| SMMPA07870 | 27 | 17 | 13 | 97  | 95  | 76  | 34  | 47  | 39  |
| SMMPA07871 | 17 | 18 | 16 | 293 | 231 | 225 | 106 | 142 | 116 |
| SMMPA07872 | 5  | 6  | 8  | 41  | 41  | 42  | 28  | 59  | 47  |
| SMMPA07873 | 15 | 24 | 21 | 84  | 58  | 63  | 46  | 70  | 55  |
| SMMPA07874 | 33 | 31 | 19 | 40  | 42  | 32  | 28  | 46  | 43  |
| SMMPA07875 | 22 | 23 | 22 | 32  | 42  | 32  | 49  | 40  | 43  |

|            |    |    |    |     |     |     |     |     |     |
|------------|----|----|----|-----|-----|-----|-----|-----|-----|
| SMMPA07876 | 28 | 33 | 27 | 39  | 34  | 24  | 42  | 50  | 44  |
| SMMPA07877 | 14 | 17 | 7  | 28  | 38  | 28  | 29  | 28  | 34  |
| SMMPA07878 | 20 | 26 | 20 | 25  | 27  | 27  | 25  | 31  | 32  |
| SMMPA07879 | 9  | 9  | 6  | 25  | 15  | 18  | 19  | 27  | 29  |
| SMMPA07880 | 17 | 22 | 14 | 32  | 26  | 28  | 28  | 34  | 39  |
| SMMPA07881 | 16 | 15 | 13 | 23  | 22  | 23  | 23  | 26  | 27  |
| SMMPA07882 | 21 | 24 | 21 | 44  | 65  | 24  | 31  | 39  | 41  |
| SMMPA07883 | 33 | 25 | 23 | 55  | 53  | 53  | 49  | 54  | 57  |
| SMMPA07884 | 21 | 20 | 17 | 20  | 18  | 8   | 15  | 19  | 25  |
| SMMPA07885 | 19 | 25 | 18 | 23  | 32  | 25  | 25  | 41  | 32  |
| SMMPA07886 | 28 | 22 | 29 | 32  | 41  | 25  | 37  | 58  | 54  |
| SMMPA07887 | 8  | 13 | 11 | 18  | 11  | 11  | 7   | 11  | 18  |
| SMMPA07888 | 17 | 29 | 22 | 24  | 22  | 23  | 30  | 35  | 23  |
| SMMPA07889 | 24 | 29 | 27 | 22  | 29  | 21  | 26  | 27  | 31  |
| SMMPA07890 | 17 | 11 | 10 | 29  | 22  | 27  | 18  | 34  | 30  |
| SMMPA07891 | 36 | 40 | 43 | 47  | 37  | 47  | 32  | 46  | 56  |
| SMMPA07892 | 39 | 28 | 30 | 49  | 36  | 20  | 26  | 52  | 40  |
| SMMPA07893 | 15 | 20 | 17 | 28  | 30  | 17  | 24  | 31  | 38  |
| SMMPA07894 | 20 | 22 | 8  | 46  | 29  | 25  | 24  | 32  | 45  |
| SMMPA07895 | 5  | 5  | 2  | 6   | 6   | 11  | 10  | 11  | 5   |
| SMMPA07896 | 13 | 23 | 17 | 91  | 93  | 87  | 62  | 61  | 57  |
| SMMPA07897 | 20 | 17 | 16 | 560 | 495 | 451 | 263 | 305 | 298 |
| SMMPA07898 | 19 | 23 | 14 | 418 | 379 | 339 | 180 | 233 | 243 |
| SMMPA07899 | 21 | 27 | 23 | 297 | 298 | 231 | 134 | 172 | 170 |
| SMMPA07900 | 12 | 13 | 11 | 111 | 96  | 80  | 77  | 111 | 81  |
| SMMPA07901 | 9  | 6  | 6  | 94  | 93  | 69  | 45  | 43  | 51  |
| SMMPA07902 | 10 | 13 | 16 | 93  | 82  | 65  | 46  | 64  | 51  |
| SMMPA07903 | 40 | 32 | 34 | 209 | 184 | 150 | 110 | 123 | 105 |
| SMMPA07904 | 13 | 11 | 17 | 99  | 74  | 70  | 49  | 40  | 58  |
| SMMPA07905 | 23 | 34 | 25 | 50  | 40  | 47  | 38  | 44  | 49  |
| SMMPA07906 | 11 | 12 | 8  | 16  | 14  | 24  | 18  | 22  | 28  |
| SMMPA07907 | 15 | 23 | 15 | 37  | 39  | 28  | 27  | 37  | 38  |
| SMMPA07908 | 29 | 22 | 22 | 41  | 39  | 25  | 35  | 35  | 35  |
| SMMPA07909 | 9  | 8  | 6  | 5   | 7   | 10  | 9   | 9   | 19  |
| SMMPA07910 | 9  | 13 | 10 | 14  | 14  | 16  | 19  | 11  | 18  |
| SMMPA07911 | 13 | 11 | 14 | 37  | 42  | 41  | 26  | 25  | 30  |
| SMMPA07912 | 16 | 22 | 6  | 18  | 25  | 21  | 19  | 28  | 24  |
| SMMPA07913 | 20 | 13 | 12 | 24  | 23  | 18  | 24  | 32  | 32  |
| SMMPA07914 | 9  | 8  | 4  | 24  | 18  | 16  | 8   | 12  | 20  |
| SMMPA07915 | 17 | 14 | 21 | 22  | 33  | 23  | 32  | 40  | 39  |
| SMMPA07916 | 4  | 12 | 11 | 76  | 82  | 54  | 35  | 40  | 37  |

|            |    |    |    |     |     |     |    |     |     |
|------------|----|----|----|-----|-----|-----|----|-----|-----|
| SMMPA07917 | 20 | 21 | 18 | 27  | 28  | 20  | 26 | 27  | 32  |
| SMMPA07918 | 14 | 13 | 11 | 46  | 31  | 21  | 20 | 33  | 27  |
| SMMPA07919 | 33 | 25 | 32 | 86  | 77  | 64  | 37 | 48  | 58  |
| SMMPA07920 | 23 | 24 | 14 | 36  | 23  | 20  | 29 | 50  | 38  |
| SMMPA07921 | 17 | 10 | 19 | 38  | 39  | 26  | 21 | 26  | 23  |
| SMMPA07922 | 22 | 23 | 22 | 41  | 35  | 31  | 24 | 33  | 18  |
| SMMPA07923 | 41 | 37 | 24 | 34  | 38  | 24  | 29 | 37  | 41  |
| SMMPA07924 | 23 | 25 | 20 | 26  | 41  | 29  | 35 | 54  | 45  |
| SMMPA07925 | 19 | 23 | 18 | 57  | 45  | 39  | 28 | 39  | 38  |
| SMMPA07926 | 21 | 31 | 20 | 231 | 235 | 190 | 94 | 166 | 119 |
| SMMPA07927 | 7  | 5  | 9  | 41  | 45  | 30  | 22 | 24  | 39  |
| SMMPA07928 | 18 | 21 | 29 | 37  | 45  | 28  | 32 | 56  | 39  |
| SMMPA07929 | 18 | 17 | 11 | 36  | 26  | 32  | 23 | 26  | 25  |
| SMMPA07930 | 21 | 19 | 23 | 92  | 82  | 60  | 37 | 46  | 51  |
| SMMPA07931 | 24 | 15 | 10 | 46  | 51  | 39  | 40 | 45  | 46  |
| SMMPA07932 | 19 | 13 | 9  | 32  | 27  | 27  | 24 | 25  | 20  |
| SMMPA07933 | 8  | 14 | 14 | 23  | 25  | 25  | 16 | 18  | 16  |
| SMMPA07934 | 8  | 13 | 11 | 24  | 35  | 31  | 23 | 30  | 26  |
| SMMPA07935 | 27 | 22 | 28 | 70  | 68  | 50  | 39 | 49  | 53  |
| SMMPA07936 | 14 | 20 | 20 | 54  | 51  | 29  | 20 | 41  | 29  |
| SMMPA07937 | 7  | 3  | 1  | 33  | 34  | 14  | 11 | 17  | 17  |
| SMMPA07938 | 10 | 14 | 13 | 29  | 26  | 24  | 19 | 24  | 35  |
| SMMPA07939 | 1  | 9  | 3  | 9   | 8   | 11  | 7  | 8   | 4   |
| SMMPA07940 | 40 | 27 | 31 | 40  | 45  | 33  | 34 | 60  | 42  |
| SMMPA07941 | 31 | 45 | 38 | 62  | 54  | 45  | 55 | 71  | 71  |
| SMMPA07942 | 33 | 37 | 29 | 82  | 79  | 48  | 76 | 96  | 91  |
| SMMPA07943 | 26 | 27 | 18 | 94  | 82  | 71  | 56 | 64  | 57  |
| SMMPA07944 | 44 | 55 | 34 | 70  | 58  | 61  | 46 | 68  | 57  |
| SMMPA07945 | 35 | 23 | 26 | 93  | 86  | 65  | 33 | 54  | 55  |
| SMMPA07946 | 19 | 6  | 19 | 27  | 21  | 17  | 23 | 30  | 18  |
| SMMPA07947 | 40 | 39 | 34 | 42  | 40  | 40  | 41 | 46  | 52  |
| SMMPA07948 | 21 | 29 | 21 | 59  | 42  | 50  | 52 | 60  | 64  |
| SMMPA07949 | 25 | 27 | 18 | 39  | 30  | 38  | 24 | 29  | 37  |
| SMMPA07950 | 44 | 38 | 35 | 55  | 69  | 52  | 59 | 91  | 83  |
| SMMPA07951 | 19 | 22 | 18 | 20  | 35  | 28  | 28 | 32  | 31  |
| SMMPA07952 | 32 | 24 | 30 | 41  | 35  | 34  | 32 | 46  | 44  |
| SMMPA07953 | 25 | 27 | 15 | 51  | 57  | 32  | 29 | 33  | 35  |
| SMMPA07954 | 30 | 20 | 21 | 39  | 51  | 46  | 31 | 43  | 40  |
| SMMPA07955 | 19 | 14 | 19 | 31  | 24  | 15  | 18 | 16  | 31  |
| SMMPA07956 | 15 | 16 | 18 | 56  | 55  | 40  | 40 | 51  | 38  |
| SMMPA07957 | 24 | 12 | 12 | 33  | 15  | 25  | 17 | 21  | 29  |

|            |    |    |    |     |     |     |     |     |     |
|------------|----|----|----|-----|-----|-----|-----|-----|-----|
| SMMPA07958 | 9  | 11 | 6  | 10  | 15  | 11  | 15  | 8   | 6   |
| SMMPA07959 | 19 | 20 | 21 | 40  | 39  | 37  | 25  | 51  | 29  |
| SMMPA07960 | 7  | 7  | 10 | 5   | 7   | 9   | 10  | 17  | 4   |
| SMMPA07961 | 14 | 10 | 12 | 12  | 9   | 5   | 4   | 11  | 9   |
| SMMPA07962 | 2  | 3  | 2  | 4   | 2   | 3   | 3   | 5   | 4   |
| SMMPA07963 | 13 | 16 | 19 | 27  | 36  | 21  | 19  | 23  | 24  |
| SMMPA07964 | 24 | 32 | 32 | 53  | 70  | 49  | 39  | 56  | 36  |
| SMMPA07965 | 11 | 29 | 22 | 318 | 274 | 259 | 92  | 116 | 105 |
| SMMPA07966 | 23 | 37 | 24 | 277 | 246 | 230 | 94  | 146 | 134 |
| SMMPA07967 | 37 | 29 | 36 | 239 | 197 | 162 | 68  | 75  | 81  |
| SMMPA07968 | 13 | 20 | 17 | 37  | 32  | 29  | 31  | 42  | 33  |
| SMMPA07969 | 44 | 33 | 31 | 37  | 42  | 36  | 38  | 49  | 32  |
| SMMPA07970 | 16 | 15 | 12 | 76  | 76  | 48  | 26  | 38  | 42  |
| SMMPA07971 | 32 | 35 | 27 | 71  | 78  | 61  | 46  | 48  | 50  |
| SMMPA07972 | 13 | 8  | 14 | 314 | 298 | 259 | 181 | 236 | 212 |
| SMMPA07973 | 15 | 20 | 15 | 42  | 47  | 24  | 18  | 33  | 27  |
| SMMPA07974 | 23 | 19 | 23 | 32  | 29  | 21  | 26  | 39  | 51  |
| SMMPA07975 | 13 | 12 | 16 | 67  | 62  | 39  | 45  | 65  | 50  |
| SMMPA07976 | 41 | 44 | 36 | 221 | 232 | 171 | 129 | 209 | 175 |
| SMMPA07977 | 20 | 31 | 20 | 148 | 142 | 102 | 72  | 76  | 75  |
| SMMPA07978 | 13 | 12 | 16 | 16  | 13  | 16  | 19  | 27  | 31  |
| SMMPA07979 | 25 | 27 | 18 | 29  | 26  | 25  | 25  | 30  | 35  |
| SMMPA07980 | 19 | 29 | 21 | 45  | 36  | 34  | 27  | 42  | 38  |
| SMMPA07981 | 10 | 15 | 12 | 18  | 16  | 10  | 11  | 29  | 26  |
| SMMPA07982 | 25 | 36 | 17 | 14  | 25  | 21  | 16  | 28  | 30  |
| SMMPA07983 | 65 | 58 | 59 | 61  | 61  | 61  | 75  | 88  | 89  |
| SMMPA07984 | 20 | 18 | 15 | 18  | 25  | 13  | 17  | 22  | 36  |
| SMMPA07985 | 15 | 13 | 13 | 23  | 22  | 23  | 26  | 31  | 25  |
| SMMPA07986 | 21 | 18 | 15 | 34  | 31  | 27  | 32  | 37  | 48  |
| SMMPA07987 | 29 | 18 | 22 | 43  | 40  | 39  | 29  | 40  | 45  |
| SMMPA07988 | 13 | 15 | 18 | 51  | 33  | 30  | 32  | 41  | 34  |
| SMMPA07989 | 38 | 50 | 40 | 59  | 58  | 51  | 58  | 72  | 57  |
| SMMPA07990 | 16 | 26 | 21 | 55  | 34  | 25  | 26  | 40  | 32  |
| SMMPA07991 | 24 | 37 | 27 | 44  | 52  | 39  | 31  | 42  | 48  |
| SMMPA07992 | 37 | 31 | 33 | 35  | 50  | 31  | 27  | 39  | 55  |
| SMMPA07993 | 18 | 20 | 15 | 52  | 38  | 37  | 42  | 57  | 48  |
| SMMPA07994 | 27 | 28 | 29 | 51  | 15  | 29  | 37  | 47  | 40  |
| SMMPA07995 | 31 | 42 | 22 | 102 | 84  | 67  | 54  | 69  | 79  |
| SMMPA07996 | 21 | 17 | 24 | 71  | 79  | 59  | 44  | 54  | 47  |
| SMMPA07997 | 12 | 13 | 16 | 82  | 74  | 57  | 31  | 59  | 62  |
| SMMPA07998 | 26 | 31 | 22 | 373 | 365 | 312 | 176 | 235 | 199 |

|            |    |    |    |     |     |     |     |     |     |
|------------|----|----|----|-----|-----|-----|-----|-----|-----|
| SMMPA07999 | 26 | 19 | 22 | 95  | 91  | 63  | 71  | 75  | 69  |
| SMMPA08000 | 24 | 20 | 21 | 101 | 75  | 63  | 39  | 53  | 56  |
| SMMPA08001 | 41 | 36 | 31 | 149 | 165 | 144 | 88  | 135 | 104 |
| SMMPA08002 | 12 | 9  | 10 | 84  | 64  | 41  | 22  | 36  | 48  |
| SMMPA08003 | 9  | 7  | 8  | 17  | 15  | 10  | 19  | 16  | 22  |
| SMMPA08004 | 18 | 25 | 21 | 103 | 91  | 84  | 59  | 75  | 63  |
| SMMPA08005 | 44 | 55 | 43 | 39  | 40  | 36  | 42  | 55  | 56  |
| SMMPA08006 | 27 | 32 | 20 | 65  | 64  | 59  | 44  | 67  | 45  |
| SMMPA08007 | 16 | 18 | 9  | 42  | 34  | 27  | 24  | 53  | 44  |
| SMMPA08008 | 1  | 8  | 5  | 12  | 7   | 6   | 6   | 21  | 10  |
| SMMPA08009 | 7  | 9  | 8  | 19  | 14  | 13  | 20  | 10  | 11  |
| SMMPA08010 | 5  | 6  | 2  | 5   | 7   | 6   | 9   | 5   | 11  |
| SMMPA08011 | 3  | 2  | 4  | 23  | 22  | 7   | 17  | 19  | 18  |
| SMMPA08012 | 23 | 23 | 23 | 90  | 72  | 52  | 50  | 53  | 49  |
| SMMPA08013 | 19 | 21 | 15 | 95  | 82  | 74  | 56  | 70  | 64  |
| SMMPA08014 | 7  | 1  | 0  | 59  | 47  | 49  | 36  | 28  | 32  |
| SMMPA08015 | 12 | 18 | 12 | 90  | 93  | 66  | 48  | 71  | 55  |
| SMMPA08016 | 24 | 29 | 21 | 124 | 90  | 79  | 75  | 104 | 79  |
| SMMPA08017 | 6  | 1  | 9  | 30  | 18  | 14  | 11  | 23  | 15  |
| SMMPA08018 | 8  | 6  | 11 | 114 | 111 | 75  | 42  | 73  | 55  |
| SMMPA08019 | 14 | 12 | 12 | 31  | 25  | 21  | 12  | 26  | 37  |
| SMMPA08020 | 8  | 12 | 16 | 48  | 35  | 41  | 20  | 32  | 31  |
| SMMPA08021 | 22 | 17 | 17 | 146 | 117 | 103 | 76  | 71  | 91  |
| SMMPA08022 | 10 | 10 | 11 | 102 | 81  | 83  | 56  | 47  | 47  |
| SMMPA08023 | 25 | 43 | 24 | 218 | 179 | 144 | 126 | 137 | 124 |
| SMMPA08024 | 11 | 15 | 9  | 160 | 145 | 116 | 124 | 154 | 148 |
| SMMPA08025 | 17 | 19 | 21 | 61  | 84  | 55  | 27  | 53  | 46  |
| SMMPA08026 | 7  | 13 | 7  | 64  | 67  | 62  | 55  | 61  | 54  |
| SMMPA08027 | 18 | 20 | 19 | 314 | 247 | 217 | 123 | 147 | 156 |
| SMMPA08028 | 4  | 6  | 7  | 11  | 9   | 12  | 3   | 11  | 9   |
| SMMPA08029 | 16 | 19 | 11 | 82  | 99  | 67  | 26  | 46  | 40  |
| SMMPA08030 | 8  | 11 | 8  | 25  | 28  | 18  | 11  | 18  | 16  |
| SMMPA08031 | 10 | 8  | 14 | 78  | 71  | 54  | 49  | 57  | 44  |
| SMMPA08032 | 16 | 12 | 15 | 55  | 42  | 29  | 30  | 39  | 27  |
| SMMPA08033 | 6  | 9  | 2  | 11  | 17  | 9   | 9   | 9   | 11  |
| SMMPA08034 | 21 | 15 | 13 | 37  | 26  | 25  | 24  | 30  | 23  |
| SMMPA08035 | 8  | 7  | 3  | 6   | 6   | 7   | 8   | 3   | 10  |
| SMMPA08036 | 12 | 14 | 13 | 30  | 31  | 35  | 11  | 23  | 29  |
| SMMPA08037 | 24 | 20 | 23 | 66  | 63  | 52  | 40  | 44  | 37  |
| SMMPA08038 | 18 | 12 | 15 | 381 | 368 | 351 | 131 | 158 | 137 |
| SMMPA08039 | 11 | 9  | 14 | 109 | 74  | 65  | 52  | 62  | 45  |

|            |    |    |    |     |     |     |    |     |    |
|------------|----|----|----|-----|-----|-----|----|-----|----|
| SMMPA08040 | 21 | 22 | 21 | 206 | 204 | 145 | 63 | 87  | 68 |
| SMMPA08041 | 9  | 9  | 1  | 14  | 12  | 14  | 17 | 13  | 19 |
| SMMPA08042 | 13 | 19 | 9  | 122 | 117 | 100 | 63 | 74  | 75 |
| SMMPA08043 | 12 | 21 | 11 | 77  | 66  | 48  | 35 | 25  | 30 |
| SMMPA08044 | 47 | 33 | 39 | 62  | 51  | 36  | 33 | 42  | 54 |
| SMMPA08045 | 27 | 20 | 26 | 66  | 43  | 63  | 25 | 44  | 55 |
| SMMPA08046 | 35 | 51 | 30 | 85  | 72  | 54  | 59 | 73  | 72 |
| SMMPA08047 | 10 | 16 | 17 | 64  | 50  | 48  | 36 | 47  | 42 |
| SMMPA08048 | 19 | 14 | 19 | 88  | 66  | 57  | 58 | 54  | 55 |
| SMMPA08049 | 20 | 18 | 15 | 60  | 43  | 31  | 31 | 39  | 46 |
| SMMPA08050 | 22 | 12 | 18 | 43  | 38  | 29  | 34 | 42  | 47 |
| SMMPA08051 | 28 | 29 | 31 | 79  | 69  | 62  | 55 | 70  | 71 |
| SMMPA08052 | 36 | 33 | 41 | 162 | 140 | 106 | 90 | 106 | 99 |
| SMMPA08053 | 13 | 17 | 5  | 76  | 74  | 60  | 36 | 55  | 58 |
| SMMPA08054 | 19 | 19 | 29 | 110 | 88  | 79  | 41 | 62  | 69 |
| SMMPA08055 | 18 | 21 | 16 | 36  | 34  | 31  | 28 | 51  | 52 |
| SMMPA08056 | 44 | 43 | 32 | 87  | 78  | 64  | 46 | 71  | 78 |
| SMMPA08057 | 24 | 46 | 30 | 32  | 30  | 41  | 37 | 50  | 45 |
| SMMPA08058 | 25 | 25 | 23 | 32  | 28  | 27  | 34 | 40  | 40 |
| SMMPA08059 | 17 | 17 | 15 | 36  | 47  | 34  | 31 | 41  | 37 |
| SMMPA08060 | 20 | 22 | 20 | 27  | 26  | 24  | 28 | 31  | 30 |
| SMMPA08061 | 6  | 18 | 18 | 20  | 16  | 17  | 19 | 18  | 27 |
| SMMPA08062 | 15 | 9  | 13 | 10  | 10  | 17  | 23 | 27  | 20 |
| SMMPA08063 | 9  | 18 | 20 | 40  | 43  | 33  | 36 | 36  | 36 |
| SMMPA08064 | 7  | 8  | 12 | 75  | 79  | 46  | 20 | 23  | 29 |
| SMMPA08065 | 33 | 34 | 26 | 85  | 61  | 52  | 43 | 57  | 70 |
| SMMPA08066 | 19 | 14 | 13 | 67  | 52  | 33  | 43 | 42  | 49 |
| SMMPA08067 | 29 | 15 | 19 | 117 | 85  | 82  | 35 | 40  | 47 |
| SMMPA08068 | 31 | 34 | 28 | 28  | 29  | 31  | 23 | 35  | 36 |
| SMMPA08069 | 35 | 29 | 25 | 74  | 77  | 87  | 45 | 64  | 48 |
| SMMPA08070 | 17 | 14 | 24 | 40  | 42  | 39  | 40 | 50  | 48 |
| SMMPA08071 | 26 | 36 | 12 | 41  | 33  | 40  | 30 | 64  | 40 |
| SMMPA08072 | 23 | 10 | 17 | 22  | 24  | 16  | 32 | 24  | 28 |
| SMMPA08073 | 6  | 13 | 6  | 30  | 24  | 27  | 17 | 18  | 22 |
| SMMPA08074 | 20 | 16 | 28 | 58  | 45  | 35  | 45 | 60  | 50 |
| SMMPA08075 | 34 | 34 | 19 | 72  | 46  | 55  | 47 | 65  | 50 |
| SMMPA08076 | 12 | 14 | 18 | 43  | 35  | 27  | 49 | 68  | 48 |
| SMMPA08077 | 12 | 19 | 17 | 44  | 55  | 36  | 31 | 67  | 45 |
| SMMPA08078 | 15 | 22 | 25 | 69  | 55  | 39  | 39 | 59  | 44 |
| SMMPA08079 | 22 | 27 | 28 | 84  | 65  | 59  | 43 | 60  | 53 |
| SMMPA08080 | 43 | 42 | 43 | 99  | 78  | 87  | 63 | 82  | 61 |

|            |    |    |    |     |     |     |     |     |     |
|------------|----|----|----|-----|-----|-----|-----|-----|-----|
| SMMPA08081 | 21 | 21 | 20 | 48  | 47  | 41  | 33  | 41  | 39  |
| SMMPA08082 | 50 | 35 | 37 | 49  | 47  | 45  | 53  | 53  | 59  |
| SMMPA08083 | 15 | 8  | 12 | 31  | 29  | 25  | 24  | 36  | 26  |
| SMMPA08084 | 24 | 24 | 16 | 49  | 47  | 32  | 26  | 42  | 47  |
| SMMPA08085 | 14 | 10 | 7  | 19  | 19  | 22  | 21  | 17  | 15  |
| SMMPA08086 | 35 | 28 | 20 | 46  | 41  | 45  | 37  | 47  | 49  |
| SMMPA08087 | 21 | 21 | 18 | 42  | 48  | 38  | 30  | 37  | 37  |
| SMMPA08088 | 46 | 40 | 24 | 126 | 119 | 95  | 56  | 109 | 85  |
| SMMPA08089 | 13 | 18 | 18 | 118 | 137 | 103 | 54  | 67  | 54  |
| SMMPA08090 | 35 | 39 | 29 | 166 | 178 | 131 | 95  | 108 | 108 |
| SMMPA08091 | 27 | 27 | 21 | 68  | 75  | 56  | 53  | 56  | 72  |
| SMMPA08092 | 20 | 30 | 20 | 159 | 153 | 132 | 81  | 102 | 87  |
| SMMPA08093 | 12 | 10 | 14 | 30  | 32  | 36  | 19  | 27  | 30  |
| SMMPA08094 | 31 | 23 | 37 | 96  | 93  | 56  | 55  | 65  | 52  |
| SMMPA08095 | 34 | 29 | 31 | 38  | 31  | 38  | 34  | 45  | 40  |
| SMMPA08096 | 25 | 29 | 31 | 64  | 56  | 49  | 44  | 68  | 59  |
| SMMPA08097 | 9  | 10 | 10 | 80  | 80  | 74  | 47  | 46  | 34  |
| SMMPA08098 | 31 | 32 | 24 | 300 | 290 | 235 | 115 | 167 | 148 |
| SMMPA08099 | 1  | 0  | 3  | 35  | 60  | 58  | 7   | 18  | 13  |
| SMMPA08100 | 39 | 33 | 32 | 263 | 218 | 200 | 112 | 123 | 97  |
| SMMPA08101 | 18 | 37 | 25 | 384 | 331 | 283 | 135 | 167 | 159 |
| SMMPA08102 | 6  | 8  | 3  | 133 | 122 | 162 | 26  | 25  | 24  |
| SMMPA08103 | 1  | 0  | 0  | 13  | 18  | 12  | 3   | 2   | 4   |
| SMMPA08104 | 12 | 17 | 13 | 66  | 84  | 76  | 29  | 50  | 47  |
| SMMPA08105 | 7  | 17 | 17 | 161 | 139 | 104 | 72  | 69  | 76  |
| SMMPA08106 | 6  | 6  | 6  | 13  | 5   | 7   | 11  | 9   | 12  |
| SMMPA08107 | 22 | 13 | 10 | 25  | 21  | 17  | 15  | 31  | 13  |
| SMMPA08108 | 26 | 25 | 22 | 29  | 34  | 41  | 44  | 35  | 49  |
| SMMPA08109 | 22 | 27 | 13 | 54  | 41  | 31  | 33  | 50  | 43  |
| SMMPA08110 | 22 | 27 | 33 | 47  | 40  | 47  | 28  | 46  | 46  |
| SMMPA08111 | 2  | 3  | 2  | 5   | 11  | 4   | 8   | 6   | 5   |
| SMMPA08112 | 18 | 31 | 24 | 45  | 48  | 52  | 41  | 38  | 25  |
| SMMPA08113 | 17 | 23 | 9  | 23  | 20  | 18  | 19  | 31  | 27  |
| SMMPA08114 | 29 | 24 | 21 | 24  | 32  | 27  | 22  | 30  | 23  |
| SMMPA08115 | 11 | 11 | 13 | 23  | 22  | 17  | 10  | 18  | 23  |
| SMMPA08116 | 33 | 32 | 28 | 91  | 61  | 69  | 49  | 47  | 62  |
| SMMPA08117 | 42 | 45 | 52 | 114 | 108 | 72  | 61  | 88  | 86  |
| SMMPA08118 | 71 | 53 | 54 | 87  | 98  | 72  | 94  | 115 | 106 |
| SMMPA08119 | 49 | 50 | 47 | 151 | 122 | 92  | 69  | 91  | 86  |
| SMMPA08120 | 34 | 37 | 22 | 46  | 45  | 47  | 42  | 42  | 36  |
| SMMPA08121 | 67 | 71 | 56 | 80  | 72  | 74  | 53  | 86  | 63  |

|            |    |     |    |     |     |     |     |     |     |
|------------|----|-----|----|-----|-----|-----|-----|-----|-----|
| SMMPA08122 | 46 | 53  | 52 | 155 | 138 | 100 | 79  | 113 | 113 |
| SMMPA08123 | 92 | 110 | 80 | 121 | 112 | 99  | 100 | 146 | 131 |
| SMMPA08124 | 54 | 56  | 50 | 70  | 69  | 70  | 58  | 83  | 68  |
| SMMPA08125 | 10 | 7   | 11 | 190 | 185 | 135 | 100 | 136 | 126 |
| SMMPA08126 | 13 | 15  | 14 | 27  | 29  | 18  | 20  | 23  | 32  |
| SMMPA08127 | 18 | 20  | 22 | 37  | 33  | 21  | 44  | 40  | 37  |
| SMMPA08128 | 3  | 7   | 5  | 13  | 10  | 12  | 12  | 12  | 19  |
| SMMPA08129 | 2  | 4   | 8  | 4   | 7   | 8   | 9   | 12  | 5   |
| SMMPA08130 | 1  | 0   | 0  | 0   | 0   | 0   | 0   | 1   | 0   |
| SMMPA08131 | 7  | 3   | 8  | 10  | 15  | 14  | 10  | 15  | 15  |
| SMMPA08132 | 9  | 7   | 14 | 33  | 18  | 17  | 13  | 19  | 18  |
| SMMPA08133 | 15 | 15  | 8  | 22  | 23  | 23  | 20  | 15  | 18  |
| SMMPA08134 | 26 | 32  | 22 | 81  | 74  | 70  | 50  | 73  | 46  |
| SMMPA08135 | 27 | 15  | 22 | 741 | 699 | 557 | 346 | 493 | 474 |
| SMMPA08136 | 11 | 11  | 13 | 35  | 14  | 19  | 26  | 23  | 24  |
| SMMPA08137 | 14 | 13  | 11 | 48  | 21  | 26  | 17  | 28  | 31  |
| SMMPA08138 | 34 | 33  | 35 | 54  | 69  | 53  | 40  | 64  | 43  |
| SMMPA08139 | 5  | 12  | 7  | 6   | 7   | 5   | 5   | 6   | 13  |
| SMMPA08140 | 14 | 18  | 8  | 16  | 7   | 7   | 17  | 17  | 15  |
| SMMPA08141 | 6  | 1   | 4  | 7   | 4   | 4   | 9   | 7   | 7   |
| SMMPA08142 | 13 | 17  | 13 | 23  | 27  | 19  | 19  | 44  | 19  |
| SMMPA08143 | 4  | 15  | 9  | 8   | 9   | 5   | 6   | 17  | 16  |
| SMMPA08144 | 6  | 10  | 6  | 5   | 6   | 3   | 7   | 17  | 19  |
| SMMPA08145 | 5  | 4   | 5  | 19  | 10  | 19  | 9   | 15  | 15  |
| SMMPA08146 | 6  | 8   | 8  | 8   | 9   | 8   | 8   | 10  | 6   |
| SMMPA08147 | 5  | 7   | 8  | 8   | 9   | 17  | 7   | 11  | 9   |
| SMMPA08148 | 7  | 7   | 5  | 10  | 7   | 14  | 5   | 12  | 7   |
| SMMPA08149 | 8  | 14  | 13 | 94  | 98  | 50  | 91  | 94  | 88  |
| SMMPA08150 | 15 | 15  | 9  | 59  | 45  | 44  | 24  | 39  | 28  |
| SMMPA08151 | 41 | 28  | 19 | 33  | 38  | 40  | 40  | 43  | 38  |
| SMMPA08152 | 22 | 26  | 20 | 57  | 69  | 67  | 47  | 40  | 28  |
| SMMPA08153 | 50 | 58  | 60 | 126 | 84  | 82  | 72  | 89  | 112 |
| SMMPA08154 | 15 | 16  | 21 | 113 | 88  | 66  | 51  | 60  | 46  |
| SMMPA08155 | 18 | 23  | 22 | 125 | 113 | 85  | 51  | 68  | 72  |
| SMMPA08156 | 9  | 16  | 8  | 35  | 26  | 30  | 39  | 41  | 31  |
| SMMPA08157 | 28 | 16  | 7  | 26  | 25  | 22  | 25  | 44  | 33  |
| SMMPA08158 | 9  | 10  | 7  | 43  | 38  | 46  | 23  | 32  | 17  |
| SMMPA08159 | 42 | 44  | 27 | 78  | 71  | 59  | 51  | 51  | 73  |
| SMMPA08160 | 32 | 38  | 42 | 91  | 68  | 67  | 41  | 60  | 58  |
| SMMPA08161 | 27 | 26  | 28 | 67  | 59  | 39  | 36  | 41  | 30  |
| SMMPA08162 | 39 | 53  | 44 | 113 | 119 | 79  | 60  | 77  | 66  |



|            |    |    |    |     |     |     |     |     |     |
|------------|----|----|----|-----|-----|-----|-----|-----|-----|
| SMMPA08163 | 21 | 25 | 22 | 62  | 49  | 42  | 28  | 35  | 45  |
| SMMPA08164 | 13 | 12 | 21 | 96  | 89  | 80  | 37  | 43  | 45  |
| SMMPA08165 | 20 | 15 | 23 | 132 | 131 | 98  | 65  | 81  | 92  |
| SMMPA08166 | 21 | 22 | 26 | 604 | 535 | 463 | 250 | 327 | 297 |
| SMMPA08167 | 15 | 19 | 18 | 36  | 45  | 41  | 29  | 34  | 27  |
| SMMPA08168 | 25 | 24 | 18 | 93  | 69  | 49  | 47  | 71  | 57  |
| SMMPA08169 | 20 | 16 | 15 | 74  | 45  | 45  | 36  | 27  | 50  |
| SMMPA08170 | 5  | 13 | 7  | 21  | 16  | 12  | 18  | 21  | 19  |
| SMMPA08171 | 9  | 14 | 10 | 16  | 15  | 14  | 10  | 17  | 9   |
| SMMPA08172 | 13 | 6  | 12 | 146 | 134 | 97  | 59  | 85  | 80  |
| SMMPA08173 | 4  | 8  | 8  | 152 | 125 | 105 | 51  | 69  | 82  |
| SMMPA08174 | 7  | 12 | 7  | 61  | 63  | 32  | 42  | 54  | 47  |
| SMMPA08175 | 12 | 11 | 11 | 98  | 73  | 53  | 48  | 59  | 61  |
| SMMPA08176 | 14 | 15 | 11 | 221 | 170 | 144 | 70  | 86  | 81  |
| SMMPA08177 | 15 | 13 | 12 | 107 | 90  | 69  | 60  | 80  | 80  |
| SMMPA08178 | 7  | 11 | 4  | 91  | 75  | 51  | 34  | 48  | 36  |
| SMMPA08179 | 7  | 12 | 8  | 81  | 87  | 50  | 52  | 65  | 56  |
| SMMPA08180 | 9  | 9  | 6  | 107 | 87  | 58  | 47  | 57  | 56  |
| SMMPA08181 | 8  | 21 | 12 | 169 | 177 | 133 | 118 | 148 | 111 |
| SMMPA08182 | 12 | 6  | 2  | 38  | 30  | 26  | 26  | 35  | 40  |
| SMMPA08183 | 25 | 21 | 15 | 73  | 71  | 57  | 50  | 69  | 53  |
| SMMPA08184 | 11 | 9  | 14 | 69  | 61  | 51  | 28  | 33  | 28  |
| SMMPA08185 | 13 | 4  | 13 | 58  | 61  | 42  | 25  | 39  | 37  |
| SMMPA08186 | 10 | 18 | 6  | 50  | 39  | 47  | 38  | 35  | 37  |
| SMMPA08187 | 20 | 20 | 29 | 70  | 77  | 40  | 95  | 109 | 119 |
| SMMPA08188 | 15 | 18 | 19 | 98  | 76  | 59  | 71  | 86  | 97  |
| SMMPA08189 | 20 | 23 | 11 | 87  | 78  | 47  | 38  | 45  | 41  |
| SMMPA08190 | 9  | 5  | 4  | 14  | 14  | 8   | 19  | 24  | 19  |
| SMMPA08191 | 21 | 12 | 15 | 65  | 59  | 39  | 57  | 53  | 68  |
| SMMPA08192 | 19 | 24 | 23 | 25  | 16  | 23  | 33  | 34  | 30  |
| SMMPA08193 | 34 | 51 | 28 | 184 | 184 | 150 | 90  | 119 | 110 |
| SMMPA08194 | 35 | 23 | 17 | 35  | 44  | 28  | 33  | 48  | 39  |
| SMMPA08195 | 34 | 38 | 30 | 26  | 33  | 15  | 29  | 44  | 36  |
| SMMPA08196 | 10 | 5  | 7  | 14  | 23  | 15  | 11  | 16  | 16  |
| SMMPA08197 | 14 | 21 | 15 | 32  | 19  | 19  | 24  | 42  | 50  |
| SMMPA08198 | 20 | 14 | 12 | 46  | 32  | 33  | 24  | 19  | 32  |
| SMMPA08199 | 24 | 14 | 26 | 28  | 33  | 26  | 25  | 27  | 37  |
| SMMPA08200 | 7  | 12 | 11 | 17  | 16  | 12  | 9   | 12  | 15  |
| SMMPA08201 | 33 | 22 | 31 | 43  | 42  | 38  | 40  | 51  | 48  |
| SMMPA08202 | 26 | 26 | 17 | 28  | 27  | 20  | 34  | 36  | 36  |
| SMMPA08203 | 32 | 43 | 40 | 39  | 45  | 70  | 60  | 57  | 73  |

|            |    |    |    |     |     |     |     |     |     |
|------------|----|----|----|-----|-----|-----|-----|-----|-----|
| SMMPA08204 | 14 | 21 | 19 | 21  | 19  | 19  | 22  | 19  | 28  |
| SMMPA08205 | 19 | 16 | 24 | 18  | 15  | 20  | 18  | 19  | 22  |
| SMMPA08206 | 39 | 38 | 29 | 86  | 91  | 60  | 66  | 65  | 84  |
| SMMPA08207 | 32 | 41 | 29 | 70  | 60  | 60  | 70  | 84  | 96  |
| SMMPA08208 | 8  | 21 | 21 | 31  | 33  | 26  | 31  | 29  | 30  |
| SMMPA08209 | 16 | 27 | 15 | 22  | 25  | 23  | 30  | 34  | 28  |
| SMMPA08210 | 37 | 59 | 31 | 175 | 176 | 170 | 56  | 54  | 58  |
| SMMPA08211 | 30 | 26 | 28 | 79  | 67  | 68  | 56  | 70  | 71  |
| SMMPA08212 | 15 | 16 | 6  | 23  | 24  | 22  | 17  | 11  | 15  |
| SMMPA08213 | 26 | 15 | 21 | 111 | 116 | 84  | 56  | 68  | 57  |
| SMMPA08214 | 25 | 27 | 26 | 224 | 210 | 178 | 112 | 144 | 131 |
| SMMPA08215 | 19 | 25 | 22 | 127 | 134 | 112 | 63  | 88  | 72  |
| SMMPA08216 | 31 | 20 | 19 | 71  | 54  | 53  | 37  | 52  | 52  |
| SMMPA08217 | 10 | 16 | 11 | 27  | 19  | 17  | 38  | 40  | 39  |
| SMMPA08218 | 8  | 7  | 1  | 8   | 17  | 14  | 6   | 10  | 9   |
| SMMPA08219 | 34 | 38 | 26 | 91  | 75  | 73  | 51  | 75  | 65  |
| SMMPA08220 | 13 | 13 | 14 | 78  | 64  | 46  | 33  | 37  | 43  |
| SMMPA08221 | 23 | 22 | 19 | 32  | 37  | 27  | 24  | 39  | 36  |
| SMMPA08222 | 11 | 8  | 10 | 12  | 12  | 2   | 8   | 12  | 14  |
| SMMPA08223 | 12 | 21 | 12 | 24  | 18  | 24  | 19  | 23  | 25  |
| SMMPA08224 | 17 | 16 | 15 | 29  | 26  | 26  | 25  | 20  | 25  |
| SMMPA08225 | 10 | 7  | 7  | 5   | 7   | 7   | 6   | 13  | 6   |
| SMMPA08226 | 1  | 3  | 7  | 11  | 21  | 11  | 7   | 12  | 13  |
| SMMPA08227 | 20 | 8  | 12 | 38  | 26  | 17  | 16  | 17  | 21  |
| SMMPA08228 | 19 | 23 | 22 | 42  | 51  | 33  | 34  | 28  | 34  |
| SMMPA08229 | 24 | 26 | 14 | 45  | 31  | 17  | 38  | 50  | 39  |
| SMMPA08230 | 13 | 30 | 18 | 34  | 29  | 20  | 26  | 44  | 36  |
| SMMPA08231 | 9  | 12 | 6  | 11  | 12  | 14  | 10  | 16  | 8   |
| SMMPA08232 | 31 | 16 | 25 | 129 | 103 | 81  | 49  | 49  | 58  |
| SMMPA08233 | 0  | 0  | 0  | 2   | 3   | 5   | 0   | 3   | 2   |
| SMMPA08234 | 7  | 9  | 6  | 17  | 13  | 13  | 11  | 20  | 9   |
| SMMPA08235 | 7  | 7  | 13 | 43  | 33  | 44  | 16  | 24  | 22  |
| SMMPA08236 | 12 | 15 | 15 | 36  | 43  | 34  | 22  | 31  | 40  |
| SMMPA08237 | 23 | 24 | 20 | 42  | 42  | 28  | 27  | 30  | 35  |
| SMMPA08238 | 46 | 55 | 52 | 98  | 105 | 73  | 72  | 109 | 73  |
| SMMPA08239 | 15 | 17 | 10 | 45  | 41  | 43  | 24  | 32  | 31  |
| SMMPA08240 | 10 | 18 | 10 | 45  | 26  | 30  | 53  | 46  | 47  |
| SMMPA08241 | 23 | 18 | 22 | 45  | 37  | 36  | 37  | 40  | 41  |
| SMMPA08242 | 42 | 68 | 59 | 24  | 23  | 25  | 36  | 58  | 63  |
| SMMPA08243 | 9  | 20 | 18 | 36  | 28  | 21  | 13  | 33  | 36  |
| SMMPA08244 | 23 | 9  | 20 | 102 | 97  | 83  | 67  | 91  | 80  |

|            |    |    |    |     |     |     |     |     |     |
|------------|----|----|----|-----|-----|-----|-----|-----|-----|
| SMMPA08245 | 29 | 20 | 18 | 39  | 21  | 19  | 30  | 28  | 24  |
| SMMPA08246 | 18 | 8  | 11 | 54  | 53  | 57  | 32  | 59  | 33  |
| SMMPA08247 | 4  | 4  | 3  | 4   | 1   | 8   | 7   | 7   | 13  |
| SMMPA08248 | 19 | 22 | 16 | 43  | 32  | 24  | 31  | 44  | 51  |
| SMMPA08249 | 6  | 9  | 4  | 31  | 28  | 18  | 21  | 21  | 24  |
| SMMPA08250 | 10 | 14 | 8  | 22  | 21  | 21  | 16  | 31  | 29  |
| SMMPA08251 | 4  | 14 | 8  | 28  | 21  | 23  | 15  | 29  | 23  |
| SMMPA08252 | 6  | 5  | 6  | 16  | 15  | 10  | 10  | 13  | 12  |
| SMMPA08253 | 6  | 4  | 4  | 2   | 3   | 6   | 7   | 10  | 10  |
| SMMPA08254 | 11 | 7  | 9  | 18  | 19  | 16  | 16  | 23  | 15  |
| SMMPA08255 | 13 | 12 | 8  | 13  | 14  | 10  | 7   | 22  | 29  |
| SMMPA08256 | 25 | 24 | 21 | 59  | 54  | 49  | 37  | 36  | 50  |
| SMMPA08257 | 27 | 25 | 23 | 46  | 38  | 29  | 50  | 53  | 41  |
| SMMPA08258 | 28 | 19 | 15 | 65  | 64  | 56  | 37  | 39  | 41  |
| SMMPA08259 | 10 | 24 | 19 | 137 | 125 | 112 | 81  | 104 | 103 |
| SMMPA08260 | 10 | 14 | 8  | 31  | 34  | 32  | 30  | 44  | 21  |
| SMMPA08261 | 20 | 7  | 18 | 77  | 72  | 65  | 43  | 63  | 57  |
| SMMPA08262 | 26 | 19 | 19 | 86  | 75  | 62  | 39  | 52  | 44  |
| SMMPA08263 | 19 | 17 | 17 | 27  | 31  | 37  | 12  | 26  | 25  |
| SMMPA08264 | 26 | 29 | 34 | 159 | 164 | 114 | 106 | 139 | 112 |
| SMMPA08265 | 21 | 22 | 28 | 27  | 42  | 40  | 21  | 30  | 26  |
| SMMPA08266 | 33 | 34 | 30 | 23  | 33  | 31  | 30  | 54  | 49  |
| SMMPA08267 | 24 | 13 | 23 | 28  | 21  | 39  | 31  | 41  | 26  |
| SMMPA08268 | 8  | 10 | 14 | 20  | 13  | 19  | 9   | 17  | 12  |
| SMMPA08269 | 16 | 14 | 14 | 17  | 14  | 21  | 15  | 22  | 22  |
| SMMPA08270 | 20 | 18 | 25 | 37  | 20  | 33  | 24  | 30  | 41  |
| SMMPA08271 | 32 | 37 | 42 | 38  | 40  | 41  | 46  | 39  | 59  |
| SMMPA08272 | 57 | 52 | 45 | 141 | 123 | 90  | 69  | 96  | 106 |
| SMMPA08273 | 18 | 23 | 15 | 151 | 136 | 102 | 83  | 113 | 79  |
| SMMPA08274 | 29 | 29 | 41 | 72  | 66  | 62  | 50  | 61  | 78  |
| SMMPA08275 | 14 | 18 | 19 | 24  | 17  | 27  | 20  | 23  | 25  |
| SMMPA08276 | 15 | 13 | 21 | 72  | 54  | 46  | 49  | 50  | 44  |
| SMMPA08277 | 22 | 24 | 25 | 69  | 47  | 45  | 46  | 67  | 63  |
| SMMPA08278 | 45 | 37 | 40 | 102 | 96  | 87  | 63  | 75  | 72  |
| SMMPA08279 | 8  | 6  | 5  | 21  | 17  | 12  | 15  | 20  | 27  |
| SMMPA08280 | 20 | 25 | 16 | 80  | 54  | 42  | 42  | 37  | 40  |
| SMMPA08281 | 14 | 13 | 10 | 32  | 28  | 30  | 24  | 27  | 26  |
| SMMPA08282 | 14 | 11 | 5  | 21  | 13  | 20  | 16  | 27  | 19  |
| SMMPA08283 | 8  | 11 | 10 | 14  | 13  | 10  | 14  | 24  | 14  |
| SMMPA08284 | 33 | 23 | 31 | 82  | 95  | 58  | 60  | 76  | 57  |
| SMMPA08285 | 15 | 14 | 12 | 23  | 19  | 16  | 27  | 34  | 27  |

|            |    |    |    |     |     |     |    |     |     |
|------------|----|----|----|-----|-----|-----|----|-----|-----|
| SMMPA08286 | 8  | 20 | 12 | 293 | 299 | 227 | 95 | 154 | 136 |
| SMMPA08287 | 18 | 22 | 8  | 103 | 106 | 72  | 57 | 83  | 60  |
| SMMPA08288 | 7  | 19 | 10 | 18  | 19  | 19  | 12 | 28  | 18  |
| SMMPA08289 | 16 | 18 | 12 | 18  | 14  | 20  | 14 | 23  | 16  |
| SMMPA08290 | 9  | 6  | 6  | 13  | 19  | 16  | 18 | 14  | 17  |
| SMMPA08291 | 15 | 16 | 13 | 25  | 28  | 23  | 19 | 23  | 17  |
| SMMPA08292 | 15 | 18 | 15 | 67  | 57  | 56  | 42 | 55  | 55  |
| SMMPA08293 | 31 | 29 | 24 | 104 | 98  | 68  | 47 | 71  | 83  |
| SMMPA08294 | 28 | 18 | 10 | 110 | 116 | 79  | 59 | 68  | 65  |
| SMMPA08295 | 23 | 18 | 28 | 51  | 42  | 53  | 44 | 72  | 69  |
| SMMPA08296 | 24 | 27 | 19 | 106 | 94  | 87  | 60 | 60  | 79  |
| SMMPA08297 | 28 | 29 | 17 | 114 | 121 | 82  | 96 | 107 | 79  |
| SMMPA08298 | 24 | 27 | 17 | 51  | 57  | 33  | 27 | 44  | 28  |
| SMMPA08299 | 16 | 30 | 25 | 117 | 125 | 68  | 79 | 109 | 113 |
| SMMPA08300 | 12 | 18 | 20 | 76  | 62  | 60  | 50 | 43  | 50  |
| SMMPA08301 | 14 | 17 | 23 | 18  | 24  | 25  | 20 | 23  | 30  |
| SMMPA08302 | 26 | 18 | 19 | 29  | 32  | 31  | 13 | 21  | 15  |
| SMMPA08303 | 22 | 24 | 19 | 45  | 29  | 56  | 28 | 49  | 25  |
| SMMPA08304 | 10 | 15 | 10 | 19  | 16  | 7   | 14 | 22  | 15  |
| SMMPA08305 | 25 | 22 | 30 | 43  | 34  | 34  | 37 | 49  | 43  |
| SMMPA08306 | 6  | 10 | 4  | 11  | 8   | 8   | 7  | 11  | 11  |
| SMMPA08307 | 7  | 12 | 6  | 10  | 10  | 18  | 16 | 17  | 14  |
| SMMPA08308 | 16 | 14 | 11 | 18  | 21  | 22  | 27 | 25  | 33  |
| SMMPA08309 | 64 | 70 | 51 | 82  | 81  | 62  | 50 | 109 | 80  |
| SMMPA08310 | 29 | 26 | 34 | 53  | 62  | 43  | 30 | 36  | 44  |
| SMMPA08311 | 35 | 29 | 36 | 84  | 73  | 65  | 70 | 86  | 57  |
| SMMPA08312 | 49 | 38 | 20 | 111 | 81  | 83  | 77 | 89  | 89  |
| SMMPA08313 | 38 | 29 | 33 | 60  | 52  | 58  | 41 | 64  | 66  |
| SMMPA08314 | 12 | 4  | 11 | 9   | 9   | 13  | 13 | 14  | 25  |
| SMMPA08315 | 6  | 8  | 7  | 15  | 15  | 15  | 9  | 20  | 6   |
| SMMPA08316 | 4  | 5  | 1  | 11  | 8   | 13  | 12 | 22  | 25  |
| SMMPA08317 | 11 | 9  | 11 | 11  | 24  | 15  | 11 | 26  | 30  |
| SMMPA08318 | 14 | 15 | 14 | 35  | 24  | 24  | 27 | 44  | 54  |
| SMMPA08319 | 16 | 31 | 18 | 63  | 59  | 45  | 43 | 59  | 56  |
| SMMPA08320 | 16 | 13 | 10 | 15  | 18  | 17  | 26 | 26  | 24  |
| SMMPA08321 | 15 | 19 | 16 | 43  | 48  | 45  | 46 | 39  | 42  |
| SMMPA08322 | 14 | 20 | 11 | 20  | 25  | 19  | 24 | 41  | 33  |
| SMMPA08323 | 8  | 13 | 4  | 18  | 23  | 14  | 22 | 20  | 31  |
| SMMPA08324 | 26 | 31 | 15 | 52  | 46  | 43  | 28 | 44  | 38  |
| SMMPA08325 | 25 | 24 | 10 | 21  | 14  | 18  | 15 | 30  | 27  |
| SMMPA08326 | 26 | 22 | 19 | 112 | 82  | 66  | 53 | 76  | 77  |

|            |     |     |     |     |     |     |     |     |     |
|------------|-----|-----|-----|-----|-----|-----|-----|-----|-----|
| SMMPA08327 | 39  | 50  | 45  | 38  | 47  | 33  | 40  | 55  | 52  |
| SMMPA08328 | 30  | 40  | 33  | 35  | 34  | 31  | 46  | 34  | 49  |
| SMMPA08329 | 32  | 34  | 23  | 24  | 28  | 25  | 22  | 25  | 31  |
| SMMPA08330 | 28  | 18  | 14  | 318 | 308 | 262 | 143 | 163 | 147 |
| SMMPA08331 | 20  | 18  | 27  | 191 | 193 | 169 | 115 | 139 | 152 |
| SMMPA08332 | 27  | 18  | 21  | 63  | 59  | 45  | 29  | 41  | 42  |
| SMMPA08333 | 17  | 24  | 18  | 30  | 32  | 28  | 22  | 33  | 28  |
| SMMPA08334 | 23  | 24  | 20  | 66  | 41  | 38  | 46  | 53  | 56  |
| SMMPA08335 | 20  | 21  | 16  | 57  | 60  | 42  | 30  | 27  | 45  |
| SMMPA08336 | 32  | 23  | 30  | 74  | 83  | 43  | 45  | 57  | 52  |
| SMMPA08337 | 13  | 17  | 19  | 54  | 57  | 36  | 24  | 40  | 37  |
| SMMPA08338 | 80  | 70  | 68  | 73  | 81  | 77  | 83  | 131 | 118 |
| SMMPA08339 | 56  | 59  | 52  | 38  | 44  | 56  | 84  | 99  | 84  |
| SMMPA08340 | 114 | 130 | 112 | 130 | 112 | 111 | 76  | 161 | 114 |
| SMMPA08341 | 56  | 59  | 53  | 137 | 126 | 97  | 79  | 110 | 122 |
| SMMPA08342 | 41  | 50  | 28  | 357 | 362 | 334 | 164 | 224 | 182 |
| SMMPA08343 | 34  | 40  | 29  | 47  | 59  | 39  | 55  | 82  | 63  |
| SMMPA08344 | 34  | 23  | 17  | 36  | 24  | 20  | 36  | 26  | 33  |
| SMMPA08345 | 43  | 31  | 27  | 70  | 56  | 45  | 49  | 74  | 68  |
| SMMPA08346 | 72  | 66  | 61  | 77  | 62  | 79  | 78  | 100 | 104 |
| SMMPA08347 | 9   | 6   | 7   | 9   | 20  | 14  | 11  | 19  | 14  |
| SMMPA08348 | 20  | 23  | 23  | 93  | 77  | 82  | 56  | 77  | 65  |
| SMMPA08349 | 17  | 13  | 12  | 38  | 28  | 28  | 19  | 30  | 31  |
| SMMPA08350 | 5   | 5   | 5   | 9   | 8   | 10  | 2   | 5   | 8   |
| SMMPA08351 | 6   | 9   | 6   | 20  | 16  | 17  | 17  | 20  | 13  |
| SMMPA08352 | 8   | 5   | 12  | 44  | 46  | 36  | 22  | 17  | 27  |
| SMMPA08353 | 9   | 11  | 11  | 42  | 34  | 27  | 27  | 42  | 27  |
| SMMPA08354 | 10  | 7   | 2   | 10  | 10  | 3   | 10  | 15  | 9   |
| SMMPA08355 | 12  | 13  | 15  | 98  | 99  | 96  | 41  | 53  | 38  |
| SMMPA08356 | 6   | 13  | 14  | 66  | 55  | 54  | 41  | 45  | 35  |
| SMMPA08357 | 8   | 6   | 9   | 78  | 70  | 50  | 27  | 41  | 50  |
| SMMPA08358 | 33  | 32  | 26  | 59  | 76  | 50  | 53  | 70  | 62  |
| SMMPA08359 | 24  | 16  | 11  | 123 | 86  | 85  | 45  | 62  | 69  |
| SMMPA08360 | 28  | 21  | 19  | 48  | 31  | 38  | 32  | 47  | 38  |
| SMMPA08361 | 18  | 25  | 18  | 47  | 49  | 35  | 36  | 50  | 33  |
| SMMPA08362 | 30  | 33  | 37  | 47  | 46  | 34  | 53  | 62  | 74  |
| SMMPA08363 | 14  | 14  | 15  | 42  | 41  | 28  | 47  | 47  | 49  |
| SMMPA08364 | 16  | 21  | 16  | 32  | 36  | 20  | 25  | 35  | 28  |
| SMMPA08365 | 33  | 51  | 34  | 298 | 274 | 252 | 143 | 183 | 167 |
| SMMPA08366 | 24  | 18  | 14  | 21  | 35  | 27  | 20  | 27  | 43  |
| SMMPA08367 | 16  | 11  | 14  | 54  | 51  | 44  | 19  | 26  | 24  |

|            |    |    |    |     |     |     |     |     |     |
|------------|----|----|----|-----|-----|-----|-----|-----|-----|
| SMMPA08368 | 10 | 16 | 14 | 85  | 73  | 70  | 33  | 36  | 25  |
| SMMPA08369 | 16 | 23 | 22 | 85  | 85  | 72  | 49  | 55  | 45  |
| SMMPA08370 | 12 | 3  | 9  | 9   | 9   | 16  | 12  | 14  | 9   |
| SMMPA08371 | 21 | 24 | 15 | 81  | 78  | 59  | 29  | 63  | 44  |
| SMMPA08372 | 30 | 29 | 24 | 37  | 37  | 41  | 38  | 39  | 42  |
| SMMPA08373 | 28 | 17 | 17 | 68  | 64  | 40  | 26  | 35  | 48  |
| SMMPA08374 | 27 | 25 | 27 | 52  | 46  | 43  | 30  | 51  | 34  |
| SMMPA08375 | 32 | 23 | 35 | 39  | 42  | 30  | 28  | 33  | 47  |
| SMMPA08376 | 26 | 13 | 16 | 35  | 46  | 36  | 25  | 26  | 37  |
| SMMPA08377 | 16 | 15 | 23 | 22  | 29  | 25  | 27  | 27  | 34  |
| SMMPA08378 | 19 | 21 | 10 | 57  | 58  | 41  | 33  | 53  | 42  |
| SMMPA08379 | 30 | 27 | 32 | 42  | 39  | 35  | 37  | 58  | 51  |
| SMMPA08380 | 2  | 0  | 1  | 1   | 2   | 4   | 3   | 4   | 1   |
| SMMPA08381 | 29 | 43 | 40 | 114 | 98  | 86  | 56  | 69  | 68  |
| SMMPA08382 | 10 | 17 | 9  | 27  | 24  | 21  | 14  | 20  | 24  |
| SMMPA08383 | 20 | 14 | 14 | 36  | 30  | 25  | 25  | 17  | 19  |
| SMMPA08384 | 11 | 14 | 11 | 120 | 94  | 75  | 36  | 47  | 45  |
| SMMPA08385 | 7  | 7  | 8  | 107 | 104 | 85  | 51  | 54  | 51  |
| SMMPA08386 | 12 | 8  | 10 | 28  | 28  | 23  | 17  | 24  | 26  |
| SMMPA08387 | 16 | 16 | 10 | 92  | 67  | 56  | 33  | 51  | 33  |
| SMMPA08388 | 8  | 7  | 8  | 33  | 31  | 30  | 16  | 21  | 18  |
| SMMPA08389 | 5  | 9  | 13 | 40  | 38  | 43  | 20  | 39  | 40  |
| SMMPA08390 | 16 | 19 | 15 | 100 | 64  | 65  | 54  | 51  | 45  |
| SMMPA08391 | 9  | 7  | 10 | 41  | 37  | 25  | 8   | 14  | 12  |
| SMMPA08392 | 3  | 10 | 6  | 49  | 29  | 23  | 18  | 24  | 26  |
| SMMPA08393 | 15 | 10 | 10 | 72  | 57  | 49  | 40  | 44  | 39  |
| SMMPA08394 | 3  | 2  | 3  | 41  | 37  | 39  | 15  | 27  | 20  |
| SMMPA08395 | 23 | 25 | 28 | 116 | 64  | 73  | 58  | 78  | 57  |
| SMMPA08396 | 27 | 34 | 42 | 206 | 217 | 153 | 115 | 155 | 141 |
| SMMPA08397 | 15 | 21 | 14 | 84  | 72  | 62  | 49  | 76  | 62  |
| SMMPA08398 | 27 | 28 | 27 | 48  | 66  | 54  | 46  | 80  | 62  |
| SMMPA08399 | 34 | 31 | 25 | 104 | 99  | 77  | 73  | 90  | 90  |
| SMMPA08400 | 26 | 15 | 24 | 42  | 50  | 42  | 32  | 57  | 48  |
| SMMPA08401 | 32 | 35 | 25 | 116 | 107 | 88  | 64  | 80  | 84  |
| SMMPA08402 | 23 | 16 | 18 | 39  | 31  | 39  | 22  | 47  | 43  |
| SMMPA08403 | 24 | 30 | 29 | 100 | 106 | 85  | 61  | 92  | 74  |
| SMMPA08404 | 20 | 27 | 18 | 10  | 15  | 9   | 25  | 27  | 43  |
| SMMPA08405 | 26 | 25 | 22 | 33  | 25  | 31  | 39  | 51  | 47  |
| SMMPA08406 | 64 | 72 | 54 | 50  | 42  | 42  | 59  | 61  | 73  |
| SMMPA08407 | 35 | 43 | 27 | 31  | 25  | 27  | 31  | 39  | 37  |
| SMMPA08408 | 32 | 42 | 29 | 25  | 23  | 26  | 28  | 40  | 43  |

|            |    |    |    |     |     |     |     |     |     |
|------------|----|----|----|-----|-----|-----|-----|-----|-----|
| SMMPA08409 | 29 | 33 | 24 | 30  | 26  | 24  | 20  | 30  | 24  |
| SMMPA08410 | 28 | 17 | 13 | 24  | 15  | 14  | 26  | 19  | 23  |
| SMMPA08411 | 20 | 26 | 20 | 35  | 18  | 31  | 25  | 22  | 33  |
| SMMPA08412 | 49 | 58 | 34 | 41  | 45  | 39  | 29  | 34  | 39  |
| SMMPA08413 | 15 | 20 | 10 | 19  | 17  | 17  | 23  | 26  | 26  |
| SMMPA08414 | 28 | 37 | 24 | 17  | 17  | 21  | 24  | 38  | 25  |
| SMMPA08415 | 17 | 17 | 16 | 66  | 64  | 58  | 44  | 54  | 45  |
| SMMPA08416 | 13 | 9  | 11 | 56  | 49  | 44  | 18  | 21  | 25  |
| SMMPA08417 | 12 | 16 | 12 | 72  | 61  | 42  | 41  | 53  | 52  |
| SMMPA08418 | 7  | 8  | 10 | 51  | 45  | 30  | 31  | 32  | 34  |
| SMMPA08419 | 13 | 18 | 7  | 34  | 38  | 24  | 17  | 38  | 24  |
| SMMPA08420 | 28 | 28 | 21 | 106 | 110 | 107 | 62  | 71  | 80  |
| SMMPA08421 | 11 | 12 | 8  | 50  | 40  | 33  | 46  | 70  | 50  |
| SMMPA08422 | 21 | 19 | 17 | 65  | 72  | 52  | 53  | 61  | 70  |
| SMMPA08423 | 13 | 13 | 11 | 82  | 73  | 65  | 54  | 63  | 71  |
| SMMPA08424 | 21 | 8  | 9  | 61  | 38  | 44  | 39  | 70  | 40  |
| SMMPA08425 | 15 | 23 | 17 | 72  | 53  | 42  | 45  | 56  | 48  |
| SMMPA08426 | 13 | 27 | 20 | 172 | 166 | 135 | 121 | 174 | 152 |
| SMMPA08427 | 8  | 13 | 11 | 43  | 34  | 26  | 21  | 27  | 35  |
| SMMPA08428 | 39 | 25 | 34 | 108 | 95  | 85  | 81  | 106 | 114 |
| SMMPA08429 | 10 | 10 | 15 | 38  | 30  | 23  | 26  | 30  | 26  |
| SMMPA08430 | 8  | 9  | 2  | 10  | 9   | 13  | 9   | 7   | 5   |
| SMMPA08431 | 22 | 13 | 11 | 90  | 107 | 104 | 44  | 46  | 49  |
| SMMPA08432 | 3  | 8  | 6  | 12  | 13  | 18  | 8   | 6   | 4   |
| SMMPA08433 | 8  | 12 | 8  | 13  | 10  | 13  | 12  | 15  | 16  |
| SMMPA08434 | 9  | 4  | 10 | 89  | 73  | 74  | 13  | 17  | 18  |
| SMMPA08435 | 15 | 21 | 12 | 36  | 41  | 52  | 17  | 28  | 22  |
| SMMPA08436 | 22 | 32 | 24 | 32  | 24  | 27  | 29  | 33  | 39  |
| SMMPA08437 | 24 | 29 | 20 | 32  | 30  | 22  | 29  | 42  | 49  |
| SMMPA08438 | 44 | 55 | 37 | 40  | 33  | 29  | 23  | 33  | 43  |
| SMMPA08439 | 22 | 20 | 23 | 49  | 42  | 30  | 41  | 41  | 34  |
| SMMPA08440 | 46 | 44 | 37 | 198 | 167 | 114 | 102 | 144 | 129 |
| SMMPA08441 | 13 | 22 | 19 | 38  | 33  | 25  | 39  | 38  | 42  |
| SMMPA08442 | 16 | 31 | 24 | 80  | 59  | 55  | 31  | 39  | 35  |
| SMMPA08443 | 16 | 22 | 17 | 78  | 62  | 50  | 38  | 57  | 49  |
| SMMPA08444 | 20 | 20 | 25 | 38  | 27  | 45  | 27  | 30  | 39  |
| SMMPA08445 | 22 | 21 | 21 | 27  | 35  | 31  | 40  | 59  | 43  |
| SMMPA08446 | 15 | 18 | 18 | 52  | 55  | 46  | 42  | 60  | 50  |
| SMMPA08447 | 25 | 28 | 21 | 135 | 120 | 101 | 52  | 72  | 66  |
| SMMPA08448 | 11 | 10 | 15 | 41  | 36  | 36  | 28  | 23  | 21  |
| SMMPA08449 | 6  | 8  | 8  | 71  | 81  | 67  | 21  | 26  | 37  |

|            |    |    |    |     |     |     |     |     |     |
|------------|----|----|----|-----|-----|-----|-----|-----|-----|
| SMMPA08450 | 18 | 14 | 20 | 115 | 106 | 76  | 43  | 63  | 56  |
| SMMPA08451 | 3  | 7  | 3  | 4   | 8   | 9   | 3   | 8   | 5   |
| SMMPA08452 | 23 | 8  | 20 | 21  | 26  | 23  | 15  | 12  | 25  |
| SMMPA08453 | 11 | 15 | 10 | 16  | 28  | 27  | 16  | 28  | 22  |
| SMMPA08454 | 4  | 7  | 3  | 21  | 26  | 19  | 7   | 6   | 12  |
| SMMPA08455 | 6  | 1  | 4  | 5   | 8   | 7   | 8   | 5   | 7   |
| SMMPA08456 | 7  | 8  | 12 | 39  | 40  | 28  | 23  | 25  | 11  |
| SMMPA08457 | 12 | 15 | 9  | 16  | 24  | 13  | 20  | 22  | 25  |
| SMMPA08458 | 37 | 32 | 30 | 97  | 78  | 61  | 63  | 74  | 65  |
| SMMPA08459 | 20 | 16 | 28 | 205 | 195 | 146 | 121 | 168 | 158 |
| SMMPA08460 | 15 | 14 | 5  | 54  | 40  | 29  | 33  | 31  | 33  |
| SMMPA08461 | 11 | 19 | 11 | 16  | 10  | 13  | 27  | 30  | 31  |
| SMMPA08462 | 9  | 9  | 6  | 14  | 16  | 19  | 14  | 26  | 16  |
| SMMPA08463 | 17 | 17 | 20 | 100 | 74  | 74  | 44  | 67  | 49  |
| SMMPA08464 | 21 | 27 | 19 | 81  | 84  | 59  | 45  | 74  | 78  |
| SMMPA08465 | 11 | 16 | 8  | 51  | 58  | 62  | 50  | 55  | 62  |
| SMMPA08466 | 7  | 7  | 9  | 94  | 81  | 57  | 82  | 98  | 76  |
| SMMPA08467 | 7  | 3  | 9  | 23  | 28  | 24  | 22  | 18  | 27  |
| SMMPA08468 | 24 | 16 | 12 | 35  | 26  | 23  | 30  | 33  | 38  |
| SMMPA08469 | 29 | 23 | 22 | 22  | 20  | 20  | 15  | 30  | 26  |
| SMMPA08470 | 16 | 9  | 15 | 174 | 142 | 126 | 56  | 79  | 60  |
| SMMPA08471 | 33 | 29 | 20 | 37  | 47  | 35  | 19  | 38  | 39  |
| SMMPA08472 | 13 | 13 | 9  | 26  | 22  | 39  | 11  | 24  | 19  |
| SMMPA08473 | 40 | 47 | 31 | 126 | 97  | 86  | 40  | 74  | 73  |
| SMMPA08474 | 18 | 24 | 13 | 127 | 125 | 100 | 46  | 50  | 49  |
| SMMPA08475 | 6  | 7  | 9  | 16  | 15  | 9   | 13  | 9   | 15  |
| SMMPA08476 | 43 | 35 | 28 | 43  | 37  | 26  | 43  | 62  | 68  |
| SMMPA08477 | 20 | 23 | 20 | 14  | 8   | 11  | 15  | 13  | 32  |
| SMMPA08478 | 57 | 69 | 63 | 68  | 61  | 61  | 65  | 88  | 84  |
| SMMPA08479 | 60 | 54 | 51 | 145 | 161 | 87  | 108 | 118 | 102 |
| SMMPA08480 | 33 | 45 | 28 | 234 | 243 | 198 | 69  | 130 | 96  |
| SMMPA08481 | 15 | 12 | 9  | 72  | 73  | 67  | 32  | 49  | 40  |
| SMMPA08482 | 33 | 47 | 25 | 50  | 37  | 45  | 37  | 50  | 50  |
| SMMPA08483 | 12 | 12 | 10 | 9   | 6   | 10  | 9   | 17  | 17  |
| SMMPA08484 | 32 | 16 | 24 | 60  | 47  | 37  | 28  | 35  | 40  |
| SMMPA08485 | 38 | 26 | 18 | 218 | 189 | 157 | 105 | 129 | 108 |
| SMMPA08486 | 8  | 11 | 8  | 11  | 16  | 18  | 18  | 18  | 23  |
| SMMPA08487 | 21 | 32 | 17 | 49  | 31  | 42  | 30  | 32  | 47  |
| SMMPA08488 | 30 | 36 | 21 | 15  | 28  | 16  | 40  | 40  | 50  |
| SMMPA08489 | 24 | 22 | 19 | 60  | 59  | 44  | 27  | 39  | 28  |
| SMMPA08490 | 16 | 15 | 13 | 36  | 34  | 26  | 30  | 30  | 18  |



|            |    |    |    |     |     |     |     |     |     |
|------------|----|----|----|-----|-----|-----|-----|-----|-----|
| SMMPA08491 | 14 | 11 | 25 | 28  | 22  | 24  | 9   | 29  | 15  |
| SMMPA08492 | 11 | 10 | 6  | 13  | 22  | 17  | 24  | 27  | 19  |
| SMMPA08493 | 19 | 16 | 26 | 22  | 35  | 29  | 26  | 22  | 32  |
| SMMPA08494 | 17 | 13 | 9  | 68  | 44  | 41  | 30  | 29  | 23  |
| SMMPA08495 | 16 | 22 | 25 | 105 | 73  | 71  | 47  | 62  | 52  |
| SMMPA08496 | 24 | 22 | 11 | 93  | 64  | 45  | 34  | 58  | 40  |
| SMMPA08497 | 11 | 8  | 12 | 83  | 71  | 52  | 71  | 83  | 60  |
| SMMPA08498 | 21 | 20 | 21 | 138 | 129 | 106 | 51  | 65  | 56  |
| SMMPA08499 | 47 | 41 | 27 | 272 | 274 | 206 | 132 | 176 | 161 |
| SMMPA08500 | 27 | 27 | 18 | 191 | 184 | 133 | 124 | 118 | 126 |
| SMMPA08501 | 15 | 22 | 9  | 82  | 79  | 78  | 43  | 55  | 65  |
| SMMPA08502 | 23 | 32 | 27 | 99  | 89  | 75  | 37  | 73  | 46  |
| SMMPA08503 | 11 | 15 | 18 | 140 | 138 | 103 | 54  | 66  | 85  |
| SMMPA08504 | 17 | 20 | 26 | 92  | 74  | 51  | 42  | 59  | 54  |
| SMMPA08505 | 53 | 50 | 46 | 72  | 66  | 76  | 62  | 61  | 70  |
| SMMPA08506 | 19 | 15 | 8  | 92  | 66  | 82  | 38  | 44  | 28  |
| SMMPA08507 | 20 | 24 | 15 | 94  | 71  | 69  | 40  | 59  | 52  |
| SMMPA08508 | 20 | 19 | 18 | 50  | 34  | 23  | 28  | 38  | 37  |
| SMMPA08509 | 23 | 20 | 17 | 168 | 139 | 116 | 101 | 132 | 123 |
| SMMPA08510 | 29 | 40 | 39 | 157 | 152 | 105 | 68  | 100 | 84  |
| SMMPA08511 | 22 | 10 | 18 | 101 | 96  | 76  | 25  | 39  | 56  |
| SMMPA08512 | 9  | 9  | 15 | 32  | 34  | 31  | 39  | 43  | 52  |
| SMMPA08513 | 13 | 24 | 13 | 107 | 87  | 53  | 90  | 105 | 112 |
| SMMPA08514 | 13 | 15 | 9  | 37  | 38  | 43  | 24  | 21  | 24  |
| SMMPA08515 | 1  | 1  | 0  | 8   | 4   | 0   | 4   | 2   | 1   |
| SMMPA08516 | 18 | 23 | 18 | 38  | 35  | 33  | 40  | 62  | 43  |
| SMMPA08517 | 23 | 10 | 9  | 57  | 66  | 50  | 15  | 39  | 26  |
| SMMPA08518 | 27 | 29 | 21 | 80  | 43  | 47  | 38  | 62  | 38  |
| SMMPA08519 | 12 | 12 | 7  | 23  | 28  | 18  | 16  | 21  | 13  |
| SMMPA08520 | 22 | 18 | 21 | 27  | 31  | 31  | 27  | 25  | 24  |
| SMMPA08521 | 6  | 5  | 6  | 14  | 11  | 18  | 12  | 11  | 9   |
| SMMPA08522 | 17 | 12 | 13 | 14  | 16  | 14  | 13  | 15  | 15  |
| SMMPA08523 | 22 | 21 | 21 | 166 | 139 | 107 | 68  | 83  | 96  |
| SMMPA08524 | 15 | 25 | 20 | 325 | 305 | 260 | 131 | 163 | 142 |
| SMMPA08525 | 43 | 42 | 30 | 102 | 87  | 63  | 66  | 105 | 80  |
| SMMPA08526 | 10 | 12 | 10 | 14  | 13  | 13  | 12  | 12  | 18  |
| SMMPA08527 | 16 | 22 | 16 | 79  | 65  | 71  | 38  | 58  | 45  |
| SMMPA08528 | 23 | 27 | 18 | 125 | 83  | 78  | 33  | 51  | 39  |
| SMMPA08529 | 27 | 16 | 23 | 177 | 159 | 132 | 68  | 114 | 106 |
| SMMPA08530 | 26 | 14 | 23 | 156 | 149 | 106 | 49  | 75  | 50  |
| SMMPA08531 | 12 | 15 | 10 | 132 | 101 | 77  | 46  | 67  | 41  |

|            |    |    |    |     |     |     |     |     |     |
|------------|----|----|----|-----|-----|-----|-----|-----|-----|
| SMMPA08532 | 5  | 10 | 12 | 46  | 58  | 36  | 13  | 39  | 39  |
| SMMPA08533 | 20 | 16 | 14 | 35  | 45  | 22  | 15  | 35  | 22  |
| SMMPA08534 | 12 | 12 | 12 | 54  | 49  | 34  | 36  | 52  | 43  |
| SMMPA08535 | 16 | 18 | 13 | 46  | 47  | 43  | 25  | 44  | 47  |
| SMMPA08536 | 17 | 14 | 10 | 24  | 29  | 26  | 18  | 12  | 12  |
| SMMPA08537 | 17 | 9  | 22 | 22  | 23  | 19  | 25  | 19  | 22  |
| SMMPA08538 | 18 | 25 | 30 | 664 | 607 | 587 | 265 | 371 | 305 |
| SMMPA08539 | 39 | 28 | 37 | 174 | 191 | 116 | 103 | 128 | 119 |
| SMMPA08540 | 17 | 25 | 23 | 904 | 824 | 797 | 369 | 503 | 474 |
| SMMPA08541 | 37 | 41 | 26 | 820 | 744 | 736 | 328 | 409 | 426 |
| SMMPA08542 | 28 | 19 | 18 | 307 | 293 | 224 | 131 | 146 | 124 |
| SMMPA08543 | 28 | 20 | 14 | 439 | 420 | 333 | 171 | 212 | 217 |
| SMMPA08544 | 20 | 27 | 15 | 479 | 447 | 382 | 148 | 222 | 187 |
| SMMPA08545 | 17 | 25 | 19 | 81  | 75  | 56  | 38  | 55  | 45  |
| SMMPA08546 | 35 | 36 | 37 | 46  | 43  | 48  | 36  | 49  | 49  |
| SMMPA08547 | 12 | 15 | 12 | 56  | 62  | 59  | 37  | 47  | 36  |
| SMMPA08548 | 20 | 37 | 24 | 47  | 35  | 37  | 47  | 51  | 78  |
| SMMPA08549 | 31 | 50 | 38 | 25  | 42  | 31  | 42  | 70  | 66  |
| SMMPA08550 | 21 | 20 | 19 | 32  | 34  | 26  | 28  | 39  | 25  |
| SMMPA08551 | 28 | 25 | 34 | 51  | 36  | 27  | 44  | 37  | 52  |
| SMMPA08552 | 43 | 36 | 39 | 96  | 76  | 70  | 53  | 77  | 66  |
| SMMPA08553 | 36 | 36 | 30 | 26  | 17  | 24  | 35  | 37  | 42  |
| SMMPA08554 | 28 | 26 | 29 | 24  | 28  | 27  | 28  | 39  | 34  |
| SMMPA08555 | 21 | 24 | 32 | 24  | 22  | 15  | 29  | 33  | 38  |
| SMMPA08556 | 44 | 46 | 29 | 74  | 58  | 65  | 49  | 53  | 50  |
| SMMPA08557 | 21 | 14 | 16 | 13  | 14  | 9   | 13  | 15  | 18  |
| SMMPA08558 | 39 | 32 | 33 | 20  | 30  | 22  | 42  | 50  | 46  |
| SMMPA08559 | 30 | 40 | 20 | 197 | 207 | 168 | 90  | 127 | 113 |
| SMMPA08560 | 27 | 26 | 26 | 199 | 169 | 131 | 95  | 158 | 131 |
| SMMPA08561 | 28 | 21 | 21 | 151 | 174 | 150 | 73  | 122 | 101 |
| SMMPA08562 | 25 | 23 | 22 | 32  | 22  | 29  | 38  | 35  | 43  |
| SMMPA08563 | 28 | 27 | 23 | 34  | 38  | 18  | 30  | 46  | 43  |
| SMMPA08564 | 37 | 49 | 27 | 120 | 101 | 73  | 49  | 90  | 88  |
| SMMPA08565 | 29 | 27 | 26 | 224 | 198 | 165 | 110 | 147 | 148 |
| SMMPA08566 | 43 | 38 | 34 | 57  | 65  | 57  | 38  | 48  | 45  |
| SMMPA08567 | 14 | 15 | 19 | 81  | 89  | 76  | 15  | 38  | 21  |
| SMMPA08568 | 12 | 15 | 10 | 38  | 33  | 37  | 14  | 17  | 10  |
| SMMPA08569 | 40 | 52 | 30 | 86  | 75  | 51  | 69  | 98  | 94  |
| SMMPA08570 | 23 | 26 | 22 | 106 | 110 | 64  | 39  | 51  | 55  |
| SMMPA08571 | 16 | 26 | 19 | 71  | 65  | 37  | 30  | 35  | 54  |
| SMMPA08572 | 15 | 14 | 17 | 28  | 27  | 33  | 35  | 41  | 41  |

|            |    |    |    |     |     |     |     |     |     |
|------------|----|----|----|-----|-----|-----|-----|-----|-----|
| SMMPA08573 | 10 | 6  | 5  | 11  | 8   | 11  | 7   | 15  | 9   |
| SMMPA08574 | 19 | 21 | 16 | 38  | 33  | 21  | 26  | 40  | 35  |
| SMMPA08575 | 14 | 19 | 13 | 21  | 29  | 19  | 24  | 26  | 21  |
| SMMPA08576 | 24 | 38 | 25 | 39  | 42  | 36  | 15  | 39  | 19  |
| SMMPA08577 | 19 | 25 | 12 | 22  | 14  | 23  | 16  | 18  | 27  |
| SMMPA08578 | 29 | 31 | 22 | 47  | 45  | 46  | 29  | 50  | 33  |
| SMMPA08579 | 43 | 40 | 37 | 81  | 91  | 86  | 43  | 65  | 72  |
| SMMPA08580 | 55 | 43 | 57 | 176 | 148 | 111 | 67  | 87  | 99  |
| SMMPA08581 | 16 | 22 | 25 | 176 | 152 | 146 | 98  | 138 | 100 |
| SMMPA08582 | 7  | 10 | 8  | 56  | 35  | 34  | 24  | 30  | 27  |
| SMMPA08583 | 3  | 5  | 3  | 21  | 17  | 15  | 11  | 12  | 13  |
| SMMPA08584 | 21 | 23 | 17 | 23  | 22  | 31  | 22  | 32  | 30  |
| SMMPA08585 | 4  | 1  | 3  | 9   | 4   | 7   | 7   | 1   | 6   |
| SMMPA08586 | 18 | 10 | 17 | 46  | 37  | 36  | 31  | 38  | 39  |
| SMMPA08587 | 8  | 13 | 13 | 59  | 44  | 49  | 17  | 21  | 39  |
| SMMPA08588 | 8  | 9  | 6  | 19  | 37  | 21  | 17  | 16  | 20  |
| SMMPA08589 | 11 | 18 | 12 | 91  | 93  | 67  | 34  | 42  | 38  |
| SMMPA08590 | 5  | 5  | 3  | 7   | 7   | 7   | 6   | 11  | 8   |
| SMMPA08591 | 8  | 8  | 2  | 37  | 31  | 21  | 21  | 21  | 13  |
| SMMPA08592 | 3  | 5  | 6  | 23  | 16  | 18  | 15  | 28  | 14  |
| SMMPA08593 | 7  | 3  | 8  | 26  | 28  | 18  | 19  | 17  | 19  |
| SMMPA08594 | 23 | 22 | 9  | 166 | 143 | 116 | 64  | 102 | 79  |
| SMMPA08595 | 32 | 26 | 12 | 30  | 24  | 30  | 26  | 30  | 32  |
| SMMPA08596 | 13 | 7  | 7  | 6   | 7   | 7   | 6   | 3   | 5   |
| SMMPA08597 | 22 | 21 | 17 | 14  | 18  | 10  | 13  | 17  | 38  |
| SMMPA08598 | 13 | 13 | 12 | 25  | 20  | 12  | 25  | 13  | 22  |
| SMMPA08599 | 17 | 21 | 21 | 34  | 32  | 30  | 24  | 25  | 30  |
| SMMPA08600 | 19 | 20 | 16 | 86  | 62  | 58  | 54  | 71  | 71  |
| SMMPA08601 | 6  | 5  | 5  | 33  | 25  | 20  | 21  | 19  | 29  |
| SMMPA08602 | 7  | 9  | 10 | 32  | 39  | 30  | 7   | 19  | 18  |
| SMMPA08603 | 12 | 26 | 27 | 412 | 371 | 297 | 179 | 217 | 221 |
| SMMPA08604 | 10 | 13 | 4  | 269 | 243 | 253 | 87  | 128 | 141 |
| SMMPA08605 | 42 | 49 | 38 | 217 | 180 | 158 | 75  | 100 | 92  |
| SMMPA08606 | 20 | 19 | 31 | 470 | 404 | 336 | 144 | 246 | 216 |
| SMMPA08607 | 28 | 16 | 28 | 61  | 53  | 42  | 38  | 66  | 56  |
| SMMPA08608 | 26 | 29 | 29 | 94  | 88  | 73  | 43  | 56  | 53  |
| SMMPA08609 | 6  | 6  | 6  | 30  | 22  | 7   | 27  | 31  | 33  |
| SMMPA08610 | 15 | 17 | 8  | 36  | 32  | 21  | 32  | 45  | 43  |
| SMMPA08611 | 15 | 12 | 9  | 28  | 27  | 24  | 22  | 20  | 29  |
| SMMPA08612 | 30 | 45 | 40 | 98  | 85  | 80  | 60  | 77  | 93  |
| SMMPA08613 | 22 | 31 | 18 | 72  | 57  | 48  | 27  | 38  | 44  |

|            |    |    |    |     |    |    |    |    |    |
|------------|----|----|----|-----|----|----|----|----|----|
| SMMPA08614 | 1  | 6  | 2  | 7   | 2  | 6  | 1  | 5  | 5  |
| SMMPA08615 | 21 | 14 | 16 | 38  | 23 | 36 | 36 | 35 | 43 |
| SMMPA08616 | 23 | 21 | 17 | 38  | 43 | 36 | 32 | 33 | 31 |
| SMMPA08617 | 27 | 19 | 21 | 20  | 26 | 15 | 17 | 33 | 24 |
| SMMPA08618 | 9  | 10 | 6  | 6   | 11 | 13 | 1  | 7  | 6  |
| SMMPA08619 | 20 | 35 | 17 | 29  | 43 | 22 | 27 | 25 | 29 |
| SMMPA08620 | 26 | 38 | 24 | 39  | 32 | 33 | 36 | 41 | 37 |
| SMMPA08621 | 19 | 18 | 21 | 39  | 29 | 41 | 20 | 20 | 21 |
| SMMPA08622 | 6  | 8  | 6  | 5   | 5  | 2  | 5  | 7  | 9  |
| SMMPA08623 | 13 | 7  | 9  | 40  | 41 | 33 | 35 | 50 | 32 |
| SMMPA08624 | 18 | 18 | 19 | 55  | 56 | 38 | 28 | 48 | 24 |
| SMMPA08625 | 26 | 23 | 26 | 78  | 84 | 57 | 39 | 62 | 76 |
| SMMPA08626 | 10 | 20 | 14 | 7   | 7  | 9  | 13 | 15 | 10 |
| SMMPA08627 | 19 | 29 | 16 | 92  | 67 | 54 | 39 | 60 | 47 |
| SMMPA08628 | 13 | 10 | 14 | 30  | 35 | 29 | 25 | 26 | 24 |
| SMMPA08629 | 18 | 21 | 23 | 124 | 91 | 70 | 50 | 87 | 72 |
| SMMPA08630 | 25 | 30 | 26 | 40  | 56 | 44 | 35 | 51 | 45 |
| SMMPA08631 | 53 | 32 | 46 | 48  | 38 | 39 | 43 | 53 | 62 |
| SMMPA08632 | 20 | 16 | 8  | 92  | 75 | 65 | 55 | 82 | 60 |
| SMMPA08633 | 23 | 14 | 15 | 46  | 40 | 39 | 23 | 25 | 28 |
| SMMPA08634 | 14 | 18 | 19 | 66  | 56 | 40 | 50 | 48 | 41 |
| SMMPA08635 | 26 | 20 | 14 | 43  | 48 | 33 | 40 | 40 | 38 |
| SMMPA08636 | 21 | 22 | 18 | 68  | 58 | 53 | 38 | 40 | 58 |
| SMMPA08637 | 29 | 24 | 30 | 90  | 58 | 35 | 52 | 57 | 47 |
| SMMPA08638 | 7  | 7  | 5  | 17  | 16 | 10 | 5  | 22 | 16 |
| SMMPA08639 | 17 | 19 | 15 | 59  | 43 | 44 | 32 | 46 | 50 |
| SMMPA08640 | 39 | 28 | 22 | 55  | 43 | 38 | 39 | 53 | 54 |
| SMMPA08641 | 14 | 5  | 10 | 28  | 18 | 19 | 12 | 17 | 13 |
| SMMPA08642 | 7  | 11 | 5  | 9   | 5  | 3  | 6  | 6  | 15 |
| SMMPA08643 | 11 | 8  | 12 | 39  | 30 | 20 | 17 | 25 | 12 |
| SMMPA08644 | 18 | 16 | 24 | 46  | 33 | 27 | 22 | 29 | 30 |
| SMMPA08645 | 18 | 20 | 19 | 44  | 40 | 38 | 18 | 37 | 42 |
| SMMPA08646 | 18 | 19 | 19 | 70  | 66 | 50 | 72 | 72 | 69 |
| SMMPA08647 | 8  | 8  | 2  | 9   | 11 | 10 | 8  | 9  | 8  |
| SMMPA08648 | 26 | 28 | 30 | 101 | 97 | 84 | 64 | 79 | 68 |
| SMMPA08649 | 38 | 35 | 38 | 65  | 47 | 46 | 51 | 69 | 67 |
| SMMPA08650 | 27 | 19 | 33 | 55  | 48 | 51 | 40 | 29 | 42 |
| SMMPA08651 | 30 | 34 | 29 | 29  | 22 | 20 | 30 | 32 | 48 |
| SMMPA08652 | 5  | 7  | 1  | 1   | 3  | 2  | 10 | 7  | 11 |
| SMMPA08653 | 17 | 30 | 19 | 22  | 19 | 12 | 31 | 25 | 31 |
| SMMPA08654 | 23 | 30 | 17 | 17  | 17 | 17 | 24 | 33 | 30 |

|            |    |    |    |     |     |     |     |     |     |
|------------|----|----|----|-----|-----|-----|-----|-----|-----|
| SMMPA08655 | 25 | 19 | 17 | 32  | 24  | 34  | 19  | 28  | 21  |
| SMMPA08656 | 23 | 10 | 15 | 43  | 30  | 21  | 23  | 36  | 25  |
| SMMPA08657 | 14 | 11 | 9  | 10  | 16  | 14  | 10  | 17  | 20  |
| SMMPA08658 | 36 | 31 | 40 | 93  | 98  | 65  | 56  | 70  | 50  |
| SMMPA08659 | 47 | 42 | 22 | 67  | 56  | 52  | 40  | 62  | 61  |
| SMMPA08660 | 23 | 23 | 15 | 100 | 103 | 98  | 52  | 67  | 64  |
| SMMPA08661 | 26 | 26 | 25 | 39  | 41  | 36  | 31  | 42  | 39  |
| SMMPA08662 | 19 | 19 | 13 | 29  | 27  | 24  | 19  | 19  | 38  |
| SMMPA08663 | 20 | 16 | 14 | 38  | 37  | 26  | 29  | 37  | 48  |
| SMMPA08664 | 9  | 12 | 9  | 97  | 90  | 75  | 54  | 70  | 63  |
| SMMPA08665 | 10 | 10 | 6  | 20  | 12  | 13  | 10  | 16  | 11  |
| SMMPA08666 | 16 | 13 | 11 | 37  | 37  | 28  | 27  | 41  | 36  |
| SMMPA08667 | 19 | 38 | 14 | 80  | 78  | 77  | 40  | 61  | 42  |
| SMMPA08668 | 14 | 11 | 15 | 22  | 24  | 25  | 11  | 15  | 27  |
| SMMPA08669 | 2  | 12 | 14 | 25  | 23  | 17  | 19  | 29  | 31  |
| SMMPA08670 | 13 | 9  | 10 | 39  | 44  | 33  | 26  | 36  | 29  |
| SMMPA08671 | 16 | 15 | 16 | 23  | 30  | 22  | 23  | 29  | 25  |
| SMMPA08672 | 13 | 16 | 17 | 27  | 17  | 18  | 23  | 28  | 30  |
| SMMPA08673 | 19 | 28 | 18 | 31  | 19  | 22  | 24  | 30  | 30  |
| SMMPA08674 | 20 | 23 | 25 | 35  | 37  | 47  | 23  | 37  | 34  |
| SMMPA08675 | 26 | 28 | 25 | 46  | 39  | 33  | 35  | 28  | 37  |
| SMMPA08676 | 36 | 42 | 29 | 72  | 63  | 45  | 35  | 61  | 54  |
| SMMPA08677 | 14 | 12 | 18 | 35  | 28  | 28  | 22  | 39  | 28  |
| SMMPA08678 | 11 | 17 | 17 | 34  | 28  | 30  | 33  | 35  | 24  |
| SMMPA08679 | 40 | 43 | 40 | 59  | 57  | 35  | 37  | 49  | 50  |
| SMMPA08680 | 14 | 11 | 10 | 27  | 22  | 33  | 19  | 35  | 21  |
| SMMPA08681 | 5  | 6  | 10 | 7   | 9   | 9   | 6   | 9   | 18  |
| SMMPA08682 | 22 | 18 | 13 | 17  | 17  | 13  | 17  | 36  | 32  |
| SMMPA08683 | 10 | 9  | 6  | 14  | 9   | 7   | 18  | 14  | 15  |
| SMMPA08684 | 7  | 3  | 6  | 21  | 27  | 13  | 19  | 19  | 18  |
| SMMPA08685 | 29 | 30 | 19 | 43  | 44  | 45  | 44  | 52  | 64  |
| SMMPA08686 | 46 | 47 | 36 | 64  | 50  | 45  | 64  | 51  | 49  |
| SMMPA08687 | 33 | 30 | 13 | 25  | 24  | 29  | 25  | 47  | 43  |
| SMMPA08688 | 24 | 18 | 25 | 158 | 131 | 90  | 54  | 99  | 81  |
| SMMPA08689 | 17 | 19 | 11 | 407 | 378 | 382 | 206 | 220 | 221 |
| SMMPA08690 | 11 | 9  | 16 | 320 | 338 | 239 | 108 | 154 | 165 |
| SMMPA08691 | 10 | 7  | 11 | 262 | 259 | 266 | 130 | 207 | 179 |
| SMMPA08692 | 23 | 31 | 23 | 210 | 190 | 152 | 80  | 142 | 100 |
| SMMPA08693 | 12 | 16 | 5  | 41  | 32  | 32  | 17  | 18  | 12  |
| SMMPA08694 | 10 | 14 | 9  | 36  | 33  | 38  | 21  | 36  | 25  |
| SMMPA08695 | 11 | 10 | 11 | 112 | 88  | 94  | 26  | 35  | 37  |

|            |    |    |    |     |     |     |     |     |     |
|------------|----|----|----|-----|-----|-----|-----|-----|-----|
| SMMPA08696 | 9  | 7  | 8  | 17  | 19  | 23  | 7   | 10  | 11  |
| SMMPA08697 | 1  | 2  | 2  | 7   | 0   | 4   | 1   | 5   | 1   |
| SMMPA08698 | 19 | 14 | 16 | 33  | 44  | 22  | 15  | 20  | 19  |
| SMMPA08699 | 11 | 10 | 5  | 11  | 9   | 9   | 9   | 17  | 13  |
| SMMPA08700 | 12 | 7  | 8  | 7   | 9   | 6   | 5   | 6   | 5   |
| SMMPA08701 | 60 | 82 | 50 | 87  | 56  | 67  | 83  | 107 | 123 |
| SMMPA08702 | 15 | 15 | 24 | 79  | 61  | 62  | 40  | 50  | 54  |
| SMMPA08703 | 29 | 27 | 25 | 96  | 109 | 78  | 51  | 59  | 46  |
| SMMPA08704 | 37 | 47 | 39 | 84  | 90  | 60  | 49  | 55  | 58  |
| SMMPA08705 | 19 | 25 | 25 | 51  | 47  | 42  | 33  | 37  | 45  |
| SMMPA08706 | 51 | 53 | 47 | 77  | 87  | 56  | 59  | 78  | 82  |
| SMMPA08707 | 29 | 37 | 31 | 215 | 196 | 173 | 95  | 136 | 136 |
| SMMPA08708 | 25 | 28 | 22 | 61  | 77  | 58  | 43  | 44  | 56  |
| SMMPA08709 | 29 | 21 | 19 | 90  | 86  | 95  | 57  | 67  | 63  |
| SMMPA08710 | 17 | 21 | 18 | 56  | 36  | 36  | 22  | 37  | 28  |
| SMMPA08711 | 28 | 26 | 26 | 153 | 151 | 77  | 57  | 108 | 84  |
| SMMPA08712 | 41 | 40 | 34 | 212 | 211 | 128 | 110 | 124 | 120 |
| SMMPA08713 | 27 | 26 | 20 | 65  | 58  | 39  | 39  | 52  | 41  |
| SMMPA08714 | 19 | 15 | 16 | 42  | 33  | 33  | 24  | 33  | 26  |
| SMMPA08715 | 24 | 24 | 19 | 78  | 69  | 57  | 40  | 55  | 48  |
| SMMPA08716 | 29 | 19 | 22 | 113 | 98  | 69  | 42  | 64  | 56  |
| SMMPA08717 | 30 | 30 | 29 | 121 | 107 | 76  | 49  | 63  | 88  |
| SMMPA08718 | 19 | 17 | 13 | 90  | 68  | 59  | 30  | 34  | 31  |
| SMMPA08719 | 13 | 17 | 15 | 129 | 113 | 82  | 63  | 110 | 88  |
| SMMPA08720 | 22 | 22 | 16 | 182 | 167 | 153 | 105 | 138 | 161 |
| SMMPA08721 | 13 | 17 | 16 | 65  | 58  | 46  | 28  | 54  | 39  |
| SMMPA08722 | 11 | 12 | 9  | 23  | 17  | 23  | 28  | 33  | 28  |
| SMMPA08723 | 14 | 22 | 21 | 69  | 52  | 44  | 53  | 50  | 69  |
| SMMPA08724 | 28 | 25 | 19 | 249 | 220 | 197 | 135 | 147 | 155 |
| SMMPA08725 | 23 | 16 | 33 | 35  | 29  | 23  | 30  | 38  | 39  |
| SMMPA08726 | 9  | 9  | 10 | 160 | 149 | 132 | 99  | 103 | 97  |
| SMMPA08727 | 3  | 19 | 9  | 232 | 249 | 193 | 128 | 197 | 141 |
| SMMPA08728 | 9  | 10 | 14 | 379 | 325 | 260 | 160 | 207 | 206 |
| SMMPA08729 | 8  | 8  | 11 | 152 | 170 | 146 | 91  | 124 | 113 |
| SMMPA08730 | 11 | 17 | 17 | 198 | 233 | 159 | 121 | 142 | 138 |
| SMMPA08731 | 9  | 12 | 10 | 301 | 292 | 251 | 145 | 208 | 179 |
| SMMPA08732 | 11 | 11 | 5  | 50  | 34  | 30  | 20  | 29  | 26  |
| SMMPA08733 | 9  | 13 | 16 | 55  | 48  | 30  | 24  | 31  | 27  |
| SMMPA08734 | 13 | 19 | 15 | 60  | 62  | 51  | 17  | 36  | 22  |
| SMMPA08735 | 11 | 21 | 19 | 65  | 61  | 41  | 29  | 57  | 47  |
| SMMPA08736 | 8  | 14 | 5  | 17  | 26  | 18  | 7   | 16  | 15  |

|            |    |    |    |      |      |      |     |     |     |
|------------|----|----|----|------|------|------|-----|-----|-----|
| SMMPA08737 | 19 | 13 | 4  | 5    | 8    | 6    | 17  | 16  | 12  |
| SMMPA08738 | 17 | 22 | 16 | 31   | 22   | 24   | 32  | 30  | 29  |
| SMMPA08739 | 26 | 21 | 18 | 34   | 31   | 31   | 30  | 37  | 34  |
| SMMPA08740 | 23 | 22 | 24 | 43   | 29   | 26   | 30  | 46  | 38  |
| SMMPA08741 | 7  | 8  | 7  | 34   | 19   | 18   | 11  | 16  | 11  |
| SMMPA08742 | 24 | 27 | 19 | 48   | 40   | 44   | 38  | 47  | 48  |
| SMMPA08743 | 11 | 12 | 13 | 22   | 20   | 15   | 23  | 22  | 23  |
| SMMPA08744 | 15 | 30 | 20 | 81   | 62   | 49   | 54  | 62  | 53  |
| SMMPA08745 | 14 | 10 | 8  | 19   | 15   | 11   | 29  | 31  | 28  |
| SMMPA08746 | 19 | 17 | 19 | 130  | 113  | 104  | 74  | 89  | 87  |
| SMMPA08747 | 16 | 19 | 16 | 36   | 33   | 32   | 34  | 29  | 37  |
| SMMPA08748 | 10 | 8  | 10 | 122  | 158  | 141  | 45  | 67  | 57  |
| SMMPA08749 | 41 | 25 | 23 | 174  | 192  | 165  | 68  | 106 | 79  |
| SMMPA08750 | 54 | 62 | 50 | 401  | 392  | 291  | 174 | 216 | 233 |
| SMMPA08751 | 79 | 96 | 85 | 565  | 501  | 394  | 357 | 384 | 388 |
| SMMPA08752 | 34 | 33 | 24 | 97   | 81   | 73   | 52  | 61  | 67  |
| SMMPA08753 | 15 | 15 | 12 | 34   | 23   | 31   | 21  | 27  | 29  |
| SMMPA08754 | 34 | 34 | 23 | 162  | 162  | 118  | 88  | 137 | 112 |
| SMMPA08755 | 30 | 32 | 20 | 92   | 88   | 72   | 52  | 60  | 66  |
| SMMPA08756 | 37 | 30 | 30 | 57   | 60   | 48   | 45  | 62  | 49  |
| SMMPA08757 | 49 | 53 | 52 | 232  | 193  | 141  | 136 | 140 | 132 |
| SMMPA08758 | 21 | 33 | 23 | 209  | 180  | 156  | 103 | 156 | 153 |
| SMMPA08759 | 14 | 13 | 9  | 41   | 45   | 25   | 23  | 29  | 19  |
| SMMPA08760 | 10 | 16 | 20 | 64   | 65   | 46   | 39  | 35  | 32  |
| SMMPA08761 | 40 | 23 | 28 | 54   | 34   | 35   | 35  | 35  | 39  |
| SMMPA08762 | 17 | 23 | 17 | 20   | 26   | 24   | 17  | 31  | 28  |
| SMMPA08763 | 26 | 28 | 24 | 26   | 21   | 17   | 31  | 61  | 44  |
| SMMPA08764 | 23 | 28 | 22 | 35   | 38   | 38   | 26  | 25  | 26  |
| SMMPA08765 | 28 | 28 | 26 | 19   | 29   | 16   | 32  | 37  | 38  |
| SMMPA08766 | 50 | 74 | 49 | 31   | 28   | 25   | 37  | 56  | 43  |
| SMMPA08767 | 30 | 24 | 25 | 33   | 24   | 32   | 26  | 45  | 48  |
| SMMPA08768 | 53 | 44 | 41 | 39   | 48   | 30   | 39  | 52  | 55  |
| SMMPA08769 | 22 | 24 | 23 | 45   | 35   | 35   | 24  | 29  | 43  |
| SMMPA08770 | 2  | 2  | 1  | 3    | 6    | 8    | 3   | 0   | 4   |
| SMMPA08771 | 20 | 37 | 19 | 55   | 39   | 40   | 28  | 50  | 51  |
| SMMPA08772 | 24 | 32 | 25 | 1120 | 1091 | 1145 | 770 | 999 | 850 |
| SMMPA08773 | 18 | 23 | 23 | 202  | 186  | 127  | 95  | 139 | 90  |
| SMMPA08774 | 15 | 16 | 12 | 241  | 220  | 196  | 114 | 134 | 124 |
| SMMPA08775 | 17 | 27 | 18 | 72   | 65   | 64   | 58  | 55  | 40  |
| SMMPA08776 | 27 | 22 | 20 | 46   | 48   | 35   | 25  | 33  | 28  |
| SMMPA08777 | 27 | 33 | 38 | 33   | 31   | 31   | 36  | 51  | 34  |

|            |    |    |    |     |     |     |     |     |     |
|------------|----|----|----|-----|-----|-----|-----|-----|-----|
| SMMPA08778 | 21 | 15 | 15 | 22  | 25  | 13  | 26  | 15  | 16  |
| SMMPA08779 | 13 | 22 | 18 | 30  | 28  | 33  | 25  | 36  | 40  |
| SMMPA08780 | 30 | 37 | 32 | 36  | 41  | 33  | 58  | 68  | 56  |
| SMMPA08781 | 43 | 46 | 27 | 35  | 27  | 24  | 31  | 35  | 35  |
| SMMPA08782 | 24 | 23 | 26 | 29  | 27  | 28  | 30  | 41  | 43  |
| SMMPA08783 | 30 | 20 | 20 | 24  | 16  | 23  | 31  | 29  | 28  |
| SMMPA08784 | 31 | 42 | 26 | 75  | 58  | 60  | 40  | 59  | 64  |
| SMMPA08785 | 31 | 33 | 37 | 42  | 40  | 30  | 39  | 56  | 49  |
| SMMPA08786 | 32 | 34 | 33 | 30  | 26  | 21  | 30  | 34  | 37  |
| SMMPA08787 | 34 | 24 | 27 | 59  | 43  | 40  | 33  | 42  | 41  |
| SMMPA08788 | 13 | 15 | 23 | 78  | 64  | 44  | 41  | 48  | 48  |
| SMMPA08789 | 29 | 28 | 30 | 65  | 54  | 37  | 29  | 39  | 38  |
| SMMPA08790 | 14 | 5  | 8  | 31  | 36  | 28  | 15  | 22  | 19  |
| SMMPA08791 | 6  | 6  | 5  | 14  | 15  | 14  | 13  | 9   | 10  |
| SMMPA08792 | 17 | 14 | 18 | 169 | 117 | 125 | 46  | 58  | 60  |
| SMMPA08793 | 32 | 33 | 22 | 157 | 158 | 117 | 74  | 93  | 82  |
| SMMPA08794 | 80 | 80 | 70 | 300 | 274 | 200 | 146 | 196 | 180 |
| SMMPA08795 | 41 | 33 | 41 | 93  | 99  | 89  | 95  | 119 | 108 |
| SMMPA08796 | 44 | 35 | 43 | 277 | 283 | 214 | 110 | 156 | 140 |
| SMMPA08797 | 39 | 30 | 27 | 139 | 112 | 107 | 65  | 124 | 121 |
| SMMPA08798 | 28 | 52 | 32 | 112 | 121 | 104 | 67  | 92  | 82  |
| SMMPA08799 | 61 | 47 | 64 | 174 | 157 | 130 | 102 | 126 | 130 |
| SMMPA08800 | 12 | 25 | 12 | 33  | 49  | 35  | 33  | 40  | 34  |
| SMMPA08801 | 45 | 45 | 33 | 107 | 85  | 89  | 80  | 78  | 70  |
| SMMPA08802 | 82 | 94 | 76 | 117 | 106 | 105 | 79  | 95  | 137 |
| SMMPA08803 | 68 | 57 | 50 | 93  | 69  | 87  | 77  | 100 | 80  |
| SMMPA08804 | 46 | 42 | 31 | 82  | 76  | 67  | 81  | 86  | 89  |
| SMMPA08805 | 15 | 12 | 20 | 43  | 39  | 32  | 29  | 36  | 21  |
| SMMPA08806 | 14 | 19 | 21 | 21  | 16  | 22  | 21  | 27  | 38  |
| SMMPA08807 | 5  | 4  | 4  | 16  | 16  | 9   | 11  | 25  | 15  |
| SMMPA08808 | 8  | 7  | 7  | 43  | 36  | 34  | 22  | 19  | 20  |
| SMMPA08809 | 12 | 19 | 18 | 124 | 130 | 89  | 61  | 82  | 75  |
| SMMPA08810 | 5  | 15 | 10 | 31  | 47  | 33  | 25  | 27  | 26  |
| SMMPA08811 | 9  | 13 | 2  | 35  | 19  | 20  | 17  | 31  | 31  |
| SMMPA08812 | 11 | 12 | 5  | 23  | 23  | 14  | 21  | 26  | 25  |
| SMMPA08813 | 20 | 24 | 22 | 105 | 116 | 90  | 57  | 66  | 68  |
| SMMPA08814 | 21 | 34 | 21 | 45  | 43  | 29  | 38  | 53  | 34  |
| SMMPA08815 | 26 | 22 | 31 | 76  | 78  | 61  | 34  | 54  | 60  |
| SMMPA08816 | 25 | 23 | 29 | 41  | 30  | 27  | 24  | 33  | 27  |
| SMMPA08817 | 22 | 13 | 17 | 36  | 25  | 14  | 13  | 19  | 27  |
| SMMPA08818 | 8  | 5  | 12 | 13  | 21  | 19  | 9   | 15  | 14  |



|            |    |    |    |     |     |     |     |     |     |
|------------|----|----|----|-----|-----|-----|-----|-----|-----|
| SMMPA08819 | 5  | 8  | 10 | 28  | 12  | 13  | 15  | 21  | 18  |
| SMMPA08820 | 40 | 35 | 24 | 27  | 28  | 25  | 27  | 31  | 26  |
| SMMPA08821 | 12 | 11 | 12 | 13  | 11  | 9   | 12  | 14  | 19  |
| SMMPA08822 | 8  | 7  | 7  | 8   | 9   | 8   | 6   | 8   | 10  |
| SMMPA08823 | 3  | 2  | 1  | 4   | 5   | 7   | 4   | 3   | 4   |
| SMMPA08824 | 34 | 18 | 25 | 164 | 158 | 136 | 84  | 106 | 95  |
| SMMPA08825 | 20 | 25 | 15 | 59  | 49  | 40  | 31  | 34  | 39  |
| SMMPA08826 | 21 | 39 | 31 | 49  | 71  | 61  | 40  | 50  | 52  |
| SMMPA08827 | 12 | 12 | 14 | 43  | 40  | 33  | 24  | 30  | 31  |
| SMMPA08828 | 23 | 28 | 25 | 69  | 90  | 63  | 48  | 74  | 87  |
| SMMPA08829 | 20 | 32 | 19 | 59  | 48  | 51  | 39  | 68  | 59  |
| SMMPA08830 | 16 | 22 | 18 | 33  | 42  | 29  | 23  | 34  | 26  |
| SMMPA08831 | 4  | 9  | 5  | 31  | 29  | 27  | 22  | 24  | 23  |
| SMMPA08832 | 12 | 18 | 16 | 105 | 76  | 65  | 41  | 71  | 50  |
| SMMPA08833 | 11 | 15 | 11 | 92  | 93  | 69  | 47  | 67  | 55  |
| SMMPA08834 | 35 | 47 | 31 | 179 | 159 | 129 | 80  | 108 | 107 |
| SMMPA08835 | 26 | 32 | 24 | 247 | 242 | 156 | 99  | 153 | 128 |
| SMMPA08836 | 16 | 20 | 17 | 155 | 141 | 103 | 59  | 109 | 87  |
| SMMPA08837 | 20 | 20 | 19 | 99  | 116 | 86  | 56  | 72  | 83  |
| SMMPA08838 | 13 | 17 | 9  | 19  | 18  | 23  | 27  | 29  | 30  |
| SMMPA08839 | 11 | 4  | 7  | 33  | 18  | 26  | 31  | 32  | 25  |
| SMMPA08840 | 11 | 16 | 10 | 21  | 30  | 17  | 23  | 23  | 31  |
| SMMPA08841 | 15 | 10 | 7  | 40  | 53  | 47  | 39  | 52  | 36  |
| SMMPA08842 | 18 | 20 | 19 | 31  | 24  | 26  | 21  | 22  | 35  |
| SMMPA08843 | 15 | 12 | 5  | 65  | 62  | 57  | 32  | 39  | 37  |
| SMMPA08844 | 8  | 6  | 10 | 18  | 26  | 19  | 19  | 20  | 24  |
| SMMPA08845 | 20 | 18 | 17 | 64  | 56  | 47  | 45  | 48  | 48  |
| SMMPA08846 | 14 | 13 | 12 | 121 | 107 | 109 | 62  | 74  | 76  |
| SMMPA08847 | 18 | 12 | 18 | 45  | 44  | 35  | 25  | 29  | 34  |
| SMMPA08848 | 23 | 31 | 27 | 134 | 93  | 96  | 52  | 70  | 50  |
| SMMPA08849 | 18 | 18 | 14 | 113 | 93  | 76  | 37  | 51  | 45  |
| SMMPA08850 | 22 | 26 | 12 | 94  | 111 | 72  | 64  | 98  | 86  |
| SMMPA08851 | 21 | 26 | 22 | 88  | 77  | 77  | 53  | 70  | 72  |
| SMMPA08852 | 28 | 32 | 34 | 88  | 78  | 71  | 63  | 110 | 79  |
| SMMPA08853 | 27 | 27 | 30 | 80  | 69  | 68  | 51  | 74  | 77  |
| SMMPA08854 | 25 | 20 | 22 | 89  | 70  | 70  | 60  | 64  | 52  |
| SMMPA08855 | 29 | 32 | 18 | 102 | 96  | 65  | 78  | 79  | 116 |
| SMMPA08856 | 29 | 26 | 16 | 113 | 98  | 65  | 60  | 82  | 56  |
| SMMPA08857 | 23 | 28 | 29 | 48  | 52  | 42  | 40  | 61  | 77  |
| SMMPA08858 | 22 | 28 | 21 | 240 | 209 | 172 | 119 | 151 | 119 |
| SMMPA08859 | 21 | 27 | 24 | 108 | 111 | 82  | 47  | 54  | 47  |

|            |    |    |    |     |     |     |     |     |     |
|------------|----|----|----|-----|-----|-----|-----|-----|-----|
| SMMPA08860 | 11 | 9  | 10 | 124 | 107 | 77  | 100 | 114 | 122 |
| SMMPA08861 | 21 | 30 | 23 | 72  | 71  | 64  | 36  | 50  | 50  |
| SMMPA08862 | 27 | 30 | 23 | 66  | 46  | 34  | 46  | 39  | 35  |
| SMMPA08863 | 40 | 41 | 32 | 123 | 94  | 115 | 61  | 85  | 95  |
| SMMPA08864 | 19 | 25 | 17 | 50  | 36  | 39  | 33  | 45  | 42  |
| SMMPA08865 | 32 | 24 | 17 | 194 | 211 | 160 | 64  | 76  | 53  |
| SMMPA08866 | 18 | 30 | 27 | 53  | 52  | 50  | 57  | 67  | 46  |
| SMMPA08867 | 20 | 17 | 23 | 46  | 45  | 46  | 26  | 28  | 40  |
| SMMPA08868 | 10 | 35 | 26 | 60  | 57  | 54  | 43  | 62  | 62  |
| SMMPA08869 | 20 | 20 | 21 | 91  | 85  | 70  | 59  | 62  | 57  |
| SMMPA08870 | 30 | 33 | 26 | 113 | 88  | 99  | 51  | 73  | 66  |
| SMMPA08871 | 20 | 36 | 15 | 61  | 57  | 49  | 29  | 68  | 47  |
| SMMPA08872 | 29 | 32 | 30 | 92  | 72  | 81  | 47  | 47  | 57  |
| SMMPA08873 | 24 | 19 | 21 | 51  | 40  | 35  | 54  | 68  | 69  |
| SMMPA08874 | 21 | 28 | 22 | 56  | 66  | 55  | 51  | 56  | 50  |
| SMMPA08875 | 33 | 35 | 41 | 69  | 61  | 49  | 28  | 53  | 55  |
| SMMPA08876 | 32 | 34 | 28 | 56  | 68  | 47  | 41  | 55  | 62  |
| SMMPA08877 | 16 | 14 | 23 | 57  | 38  | 49  | 44  | 51  | 48  |
| SMMPA08878 | 25 | 21 | 23 | 39  | 29  | 23  | 39  | 47  | 44  |
| SMMPA08879 | 13 | 15 | 15 | 105 | 72  | 65  | 56  | 45  | 59  |
| SMMPA08880 | 23 | 16 | 8  | 100 | 73  | 64  | 47  | 78  | 78  |
| SMMPA08881 | 16 | 20 | 17 | 169 | 120 | 116 | 101 | 104 | 97  |
| SMMPA08882 | 11 | 14 | 19 | 58  | 49  | 47  | 29  | 53  | 54  |
| SMMPA08883 | 11 | 15 | 14 | 20  | 18  | 15  | 15  | 26  | 20  |
| SMMPA08884 | 4  | 2  | 1  | 20  | 14  | 11  | 14  | 7   | 11  |
| SMMPA08885 | 24 | 13 | 14 | 33  | 27  | 25  | 37  | 27  | 32  |
| SMMPA08886 | 32 | 29 | 11 | 24  | 27  | 24  | 25  | 32  | 30  |
| SMMPA08887 | 7  | 8  | 6  | 9   | 12  | 12  | 17  | 19  | 6   |
| SMMPA08888 | 21 | 19 | 13 | 59  | 39  | 25  | 30  | 35  | 31  |
| SMMPA08889 | 22 | 27 | 18 | 37  | 36  | 30  | 22  | 39  | 32  |
| SMMPA08890 | 11 | 8  | 10 | 41  | 34  | 29  | 17  | 35  | 19  |
| SMMPA08891 | 21 | 31 | 16 | 44  | 39  | 41  | 36  | 50  | 42  |
| SMMPA08892 | 12 | 17 | 15 | 61  | 62  | 52  | 27  | 31  | 33  |
| SMMPA08893 | 7  | 3  | 7  | 31  | 21  | 20  | 20  | 37  | 32  |
| SMMPA08894 | 19 | 19 | 14 | 54  | 46  | 44  | 42  | 41  | 44  |
| SMMPA08895 | 20 | 22 | 20 | 53  | 45  | 28  | 34  | 40  | 46  |
| SMMPA08896 | 10 | 12 | 12 | 51  | 39  | 25  | 36  | 29  | 32  |
| SMMPA08897 | 15 | 17 | 13 | 64  | 56  | 53  | 44  | 43  | 57  |
| SMMPA08898 | 51 | 53 | 48 | 244 | 228 | 180 | 102 | 146 | 126 |
| SMMPA08899 | 35 | 47 | 37 | 127 | 133 | 107 | 54  | 98  | 82  |
| SMMPA08900 | 58 | 40 | 38 | 148 | 124 | 107 | 87  | 106 | 90  |

|            |    |    |    |     |     |     |     |     |     |
|------------|----|----|----|-----|-----|-----|-----|-----|-----|
| SMMPA08901 | 22 | 31 | 22 | 125 | 124 | 95  | 72  | 107 | 89  |
| SMMPA08902 | 28 | 30 | 32 | 138 | 134 | 157 | 65  | 89  | 73  |
| SMMPA08903 | 24 | 32 | 20 | 494 | 454 | 409 | 210 | 283 | 247 |
| SMMPA08904 | 18 | 21 | 15 | 23  | 28  | 25  | 22  | 41  | 34  |
| SMMPA08905 | 24 | 22 | 14 | 30  | 33  | 45  | 22  | 38  | 36  |
| SMMPA08906 | 25 | 18 | 14 | 74  | 55  | 68  | 45  | 58  | 69  |
| SMMPA08907 | 8  | 6  | 8  | 95  | 85  | 68  | 28  | 37  | 35  |
| SMMPA08908 | 14 | 16 | 18 | 319 | 284 | 225 | 113 | 151 | 125 |
| SMMPA08909 | 30 | 30 | 15 | 29  | 29  | 29  | 37  | 57  | 60  |
| SMMPA08910 | 20 | 15 | 20 | 103 | 107 | 86  | 49  | 100 | 76  |
| SMMPA08911 | 0  | 0  | 0  | 2   | 0   | 2   | 0   | 1   | 0   |
| SMMPA08912 | 35 | 21 | 28 | 68  | 69  | 58  | 70  | 95  | 71  |
| SMMPA08913 | 38 | 36 | 26 | 145 | 138 | 112 | 87  | 123 | 121 |
| SMMPA08914 | 7  | 9  | 4  | 22  | 20  | 13  | 15  | 19  | 18  |
| SMMPA08915 | 31 | 35 | 31 | 36  | 36  | 35  | 30  | 40  | 44  |
| SMMPA08916 | 10 | 8  | 16 | 21  | 18  | 16  | 16  | 28  | 31  |
| SMMPA08917 | 11 | 13 | 11 | 24  | 15  | 15  | 11  | 14  | 20  |
| SMMPA08918 | 29 | 24 | 24 | 42  | 41  | 25  | 32  | 38  | 35  |
| SMMPA08919 | 11 | 16 | 19 | 26  | 30  | 22  | 16  | 17  | 25  |
| SMMPA08920 | 9  | 13 | 11 | 46  | 29  | 33  | 23  | 41  | 31  |
| SMMPA08921 | 30 | 28 | 21 | 54  | 52  | 38  | 32  | 64  | 40  |
| SMMPA08922 | 28 | 32 | 38 | 104 | 70  | 53  | 54  | 62  | 66  |
| SMMPA08923 | 15 | 14 | 21 | 29  | 29  | 21  | 27  | 22  | 21  |
| SMMPA08924 | 53 | 57 | 51 | 31  | 27  | 24  | 38  | 43  | 48  |
| SMMPA08925 | 19 | 14 | 5  | 17  | 17  | 9   | 11  | 15  | 14  |
| SMMPA08926 | 26 | 30 | 25 | 30  | 37  | 31  | 32  | 45  | 43  |
| SMMPA08927 | 24 | 20 | 18 | 39  | 28  | 22  | 34  | 33  | 56  |
| SMMPA08928 | 8  | 7  | 11 | 14  | 6   | 13  | 12  | 18  | 14  |
| SMMPA08929 | 9  | 16 | 16 | 34  | 25  | 24  | 20  | 19  | 27  |
| SMMPA08930 | 21 | 36 | 23 | 39  | 43  | 28  | 34  | 40  | 50  |
| SMMPA08931 | 15 | 11 | 10 | 57  | 75  | 41  | 47  | 65  | 79  |
| SMMPA08932 | 33 | 26 | 16 | 97  | 88  | 75  | 44  | 60  | 49  |
| SMMPA08933 | 16 | 18 | 8  | 34  | 36  | 21  | 20  | 40  | 26  |
| SMMPA08934 | 50 | 29 | 26 | 74  | 78  | 73  | 57  | 74  | 96  |
| SMMPA08935 | 12 | 10 | 5  | 17  | 9   | 7   | 11  | 13  | 10  |
| SMMPA08936 | 19 | 30 | 25 | 11  | 20  | 18  | 23  | 30  | 23  |
| SMMPA08937 | 71 | 62 | 49 | 84  | 80  | 79  | 86  | 73  | 93  |
| SMMPA08938 | 21 | 9  | 22 | 75  | 61  | 51  | 38  | 48  | 48  |
| SMMPA08939 | 14 | 17 | 24 | 48  | 47  | 40  | 47  | 47  | 43  |
| SMMPA08940 | 40 | 41 | 29 | 121 | 92  | 69  | 57  | 72  | 88  |
| SMMPA08941 | 16 | 23 | 11 | 168 | 178 | 137 | 75  | 78  | 86  |

|            |    |     |     |     |     |     |     |     |     |
|------------|----|-----|-----|-----|-----|-----|-----|-----|-----|
| SMMPA08942 | 12 | 13  | 13  | 8   | 9   | 9   | 7   | 12  | 7   |
| SMMPA08943 | 29 | 32  | 30  | 85  | 67  | 57  | 73  | 88  | 68  |
| SMMPA08944 | 17 | 20  | 20  | 140 | 110 | 110 | 38  | 81  | 62  |
| SMMPA08945 | 43 | 41  | 52  | 210 | 209 | 160 | 125 | 170 | 144 |
| SMMPA08946 | 75 | 85  | 70  | 191 | 165 | 162 | 146 | 193 | 180 |
| SMMPA08947 | 81 | 80  | 74  | 246 | 233 | 201 | 191 | 236 | 234 |
| SMMPA08948 | 42 | 49  | 42  | 71  | 55  | 49  | 89  | 93  | 105 |
| SMMPA08949 | 31 | 31  | 32  | 44  | 46  | 51  | 73  | 82  | 84  |
| SMMPA08950 | 69 | 66  | 68  | 85  | 80  | 82  | 113 | 144 | 140 |
| SMMPA08951 | 58 | 60  | 58  | 117 | 89  | 53  | 98  | 146 | 143 |
| SMMPA08952 | 92 | 104 | 105 | 94  | 68  | 92  | 151 | 211 | 201 |
| SMMPA08953 | 24 | 17  | 11  | 47  | 61  | 41  | 25  | 44  | 34  |
| SMMPA08954 | 18 | 12  | 11  | 44  | 34  | 42  | 18  | 35  | 30  |
| SMMPA08955 | 11 | 11  | 16  | 30  | 23  | 18  | 26  | 18  | 13  |
| SMMPA08956 | 71 | 69  | 65  | 45  | 38  | 45  | 58  | 67  | 72  |
| SMMPA08957 | 33 | 40  | 31  | 41  | 51  | 35  | 41  | 49  | 53  |
| SMMPA08958 | 11 | 8   | 10  | 19  | 27  | 19  | 12  | 16  | 13  |
| SMMPA08959 | 2  | 0   | 1   | 4   | 5   | 6   | 6   | 4   | 3   |
| SMMPA08960 | 8  | 7   | 8   | 12  | 13  | 11  | 11  | 15  | 15  |
| SMMPA08961 | 24 | 38  | 28  | 72  | 59  | 59  | 41  | 41  | 43  |
| SMMPA08962 | 39 | 29  | 20  | 41  | 35  | 39  | 48  | 45  | 53  |
| SMMPA08963 | 17 | 27  | 14  | 32  | 33  | 16  | 27  | 28  | 24  |
| SMMPA08964 | 33 | 24  | 20  | 70  | 81  | 60  | 76  | 71  | 78  |
| SMMPA08965 | 36 | 34  | 36  | 90  | 78  | 59  | 53  | 77  | 72  |
| SMMPA08966 | 20 | 26  | 27  | 94  | 81  | 62  | 58  | 74  | 75  |
| SMMPA08967 | 37 | 31  | 35  | 38  | 33  | 30  | 35  | 50  | 65  |
| SMMPA08968 | 13 | 22  | 20  | 155 | 140 | 129 | 71  | 94  | 77  |
| SMMPA08969 | 27 | 35  | 38  | 87  | 86  | 61  | 40  | 55  | 66  |
| SMMPA08970 | 17 | 26  | 17  | 34  | 38  | 36  | 27  | 46  | 30  |
| SMMPA08971 | 22 | 23  | 26  | 30  | 26  | 21  | 38  | 45  | 44  |
| SMMPA08972 | 2  | 3   | 4   | 21  | 15  | 13  | 16  | 22  | 16  |
| SMMPA08973 | 10 | 14  | 6   | 70  | 83  | 60  | 38  | 39  | 50  |
| SMMPA08974 | 17 | 30  | 23  | 207 | 191 | 136 | 83  | 90  | 86  |
| SMMPA08975 | 17 | 21  | 15  | 266 | 271 | 184 | 85  | 135 | 120 |
| SMMPA08976 | 30 | 26  | 21  | 189 | 191 | 139 | 87  | 108 | 109 |
| SMMPA08977 | 12 | 5   | 10  | 42  | 37  | 34  | 25  | 19  | 25  |
| SMMPA08978 | 21 | 20  | 25  | 178 | 153 | 127 | 54  | 75  | 72  |
| SMMPA08979 | 12 | 22  | 15  | 80  | 58  | 58  | 28  | 46  | 46  |
| SMMPA08980 | 23 | 22  | 25  | 97  | 115 | 73  | 32  | 48  | 49  |
| SMMPA08981 | 18 | 19  | 12  | 539 | 497 | 461 | 170 | 237 | 194 |
| SMMPA08982 | 20 | 18  | 21  | 544 | 520 | 439 | 321 | 385 | 363 |

|            |    |    |    |     |     |     |     |     |     |
|------------|----|----|----|-----|-----|-----|-----|-----|-----|
| SMMPA08983 | 16 | 17 | 17 | 697 | 653 | 628 | 505 | 662 | 655 |
| SMMPA08984 | 13 | 17 | 16 | 322 | 325 | 265 | 154 | 222 | 175 |
| SMMPA08985 | 24 | 29 | 27 | 479 | 489 | 335 | 170 | 207 | 203 |
| SMMPA08986 | 9  | 11 | 5  | 76  | 91  | 59  | 31  | 66  | 46  |
| SMMPA08987 | 14 | 16 | 15 | 226 | 194 | 152 | 84  | 125 | 111 |
| SMMPA08988 | 16 | 10 | 10 | 413 | 385 | 357 | 216 | 307 | 233 |
| SMMPA08989 | 15 | 15 | 11 | 412 | 374 | 290 | 152 | 214 | 177 |
| SMMPA08990 | 24 | 25 | 20 | 834 | 756 | 668 | 423 | 607 | 546 |
| SMMPA08991 | 16 | 11 | 13 | 59  | 49  | 57  | 48  | 65  | 56  |
| SMMPA08992 | 24 | 26 | 21 | 72  | 69  | 49  | 50  | 77  | 63  |
| SMMPA08993 | 21 | 31 | 20 | 81  | 60  | 64  | 71  | 76  | 77  |
| SMMPA08994 | 21 | 27 | 19 | 34  | 35  | 32  | 14  | 21  | 37  |
| SMMPA08995 | 40 | 48 | 40 | 63  | 68  | 66  | 45  | 68  | 73  |
| SMMPA08996 | 11 | 9  | 10 | 118 | 97  | 71  | 61  | 73  | 73  |
| SMMPA08997 | 23 | 25 | 25 | 492 | 488 | 380 | 258 | 359 | 306 |
| SMMPA08998 | 13 | 10 | 10 | 291 | 265 | 215 | 124 | 193 | 188 |
| SMMPA08999 | 33 | 33 | 24 | 711 | 586 | 464 | 391 | 475 | 423 |
| SMMPA09000 | 31 | 51 | 37 | 599 | 676 | 467 | 426 | 512 | 491 |
| SMMPA09001 | 12 | 9  | 9  | 29  | 26  | 30  | 27  | 16  | 29  |
| SMMPA09002 | 19 | 17 | 11 | 47  | 34  | 38  | 30  | 40  | 39  |
| SMMPA09003 | 29 | 22 | 30 | 161 | 148 | 111 | 78  | 67  | 101 |
| SMMPA09004 | 8  | 6  | 7  | 12  | 11  | 15  | 8   | 13  | 21  |
| SMMPA09005 | 11 | 20 | 27 | 20  | 23  | 24  | 26  | 35  | 31  |
| SMMPA09006 | 17 | 26 | 14 | 51  | 57  | 53  | 27  | 39  | 40  |
| SMMPA09007 | 22 | 14 | 10 | 51  | 40  | 44  | 30  | 35  | 32  |
| SMMPA09008 | 18 | 18 | 18 | 42  | 32  | 24  | 23  | 26  | 27  |
| SMMPA09009 | 8  | 17 | 9  | 34  | 23  | 29  | 28  | 29  | 31  |
| SMMPA09010 | 14 | 24 | 13 | 62  | 61  | 67  | 26  | 48  | 47  |
| SMMPA09011 | 9  | 11 | 11 | 55  | 52  | 49  | 25  | 43  | 34  |
| SMMPA09012 | 35 | 40 | 28 | 444 | 402 | 328 | 169 | 192 | 222 |
| SMMPA09013 | 20 | 20 | 17 | 61  | 46  | 33  | 26  | 51  | 42  |
| SMMPA09014 | 5  | 9  | 3  | 45  | 40  | 25  | 24  | 26  | 30  |
| SMMPA09015 | 5  | 7  | 7  | 97  | 98  | 81  | 45  | 58  | 54  |
| SMMPA09016 | 24 | 32 | 28 | 44  | 48  | 47  | 45  | 50  | 64  |
| SMMPA09017 | 24 | 12 | 11 | 103 | 80  | 65  | 30  | 48  | 43  |
| SMMPA09018 | 11 | 12 | 7  | 60  | 49  | 64  | 28  | 45  | 34  |
| SMMPA09019 | 15 | 16 | 24 | 143 | 149 | 119 | 78  | 95  | 71  |
| SMMPA09020 | 35 | 30 | 23 | 402 | 384 | 284 | 173 | 223 | 187 |
| SMMPA09021 | 12 | 12 | 14 | 180 | 154 | 115 | 66  | 77  | 69  |
| SMMPA09022 | 6  | 6  | 12 | 53  | 37  | 26  | 25  | 39  | 30  |
| SMMPA09023 | 12 | 8  | 7  | 40  | 38  | 32  | 30  | 40  | 35  |

|            |    |    |    |     |     |     |    |     |     |
|------------|----|----|----|-----|-----|-----|----|-----|-----|
| SMMPA09024 | 34 | 23 | 17 | 94  | 96  | 63  | 58 | 68  | 72  |
| SMMPA09025 | 4  | 7  | 8  | 14  | 10  | 10  | 14 | 26  | 16  |
| SMMPA09026 | 40 | 35 | 28 | 66  | 72  | 55  | 40 | 47  | 44  |
| SMMPA09027 | 28 | 21 | 27 | 158 | 150 | 133 | 82 | 88  | 91  |
| SMMPA09028 | 31 | 18 | 17 | 44  | 29  | 29  | 26 | 38  | 30  |
| SMMPA09029 | 27 | 18 | 16 | 36  | 17  | 30  | 34 | 33  | 39  |
| SMMPA09030 | 24 | 19 | 16 | 21  | 13  | 19  | 17 | 27  | 23  |
| SMMPA09031 | 16 | 14 | 20 | 52  | 24  | 33  | 26 | 41  | 26  |
| SMMPA09032 | 32 | 35 | 30 | 101 | 102 | 68  | 42 | 66  | 67  |
| SMMPA09033 | 16 | 16 | 18 | 218 | 179 | 180 | 93 | 111 | 85  |
| SMMPA09034 | 14 | 9  | 8  | 27  | 21  | 19  | 18 | 30  | 28  |
| SMMPA09035 | 10 | 10 | 5  | 20  | 23  | 16  | 16 | 21  | 21  |
| SMMPA09036 | 11 | 6  | 11 | 37  | 49  | 33  | 18 | 15  | 20  |
| SMMPA09037 | 14 | 18 | 16 | 26  | 24  | 24  | 31 | 27  | 32  |
| SMMPA09038 | 7  | 8  | 5  | 5   | 5   | 5   | 7  | 7   | 2   |
| SMMPA09039 | 12 | 20 | 22 | 27  | 33  | 28  | 18 | 29  | 31  |
| SMMPA09040 | 23 | 19 | 19 | 122 | 103 | 73  | 86 | 114 | 107 |
| SMMPA09041 | 9  | 10 | 15 | 16  | 14  | 6   | 9  | 12  | 14  |
| SMMPA09042 | 12 | 9  | 8  | 26  | 32  | 26  | 25 | 29  | 31  |
| SMMPA09043 | 18 | 20 | 19 | 71  | 48  | 44  | 34 | 32  | 25  |
| SMMPA09044 | 19 | 17 | 21 | 79  | 87  | 62  | 80 | 110 | 89  |
| SMMPA09045 | 10 | 14 | 15 | 20  | 27  | 24  | 13 | 20  | 11  |
| SMMPA09046 | 7  | 9  | 8  | 15  | 12  | 7   | 13 | 17  | 16  |
| SMMPA09047 | 6  | 2  | 3  | 53  | 39  | 43  | 27 | 37  | 30  |
| SMMPA09048 | 2  | 1  | 2  | 6   | 6   | 6   | 4  | 9   | 5   |
| SMMPA09049 | 7  | 5  | 10 | 47  | 46  | 31  | 25 | 38  | 28  |
| SMMPA09050 | 19 | 24 | 19 | 232 | 234 | 172 | 99 | 144 | 114 |
| SMMPA09051 | 14 | 10 | 9  | 30  | 17  | 11  | 13 | 11  | 11  |
| SMMPA09052 | 8  | 9  | 14 | 50  | 39  | 30  | 27 | 34  | 38  |
| SMMPA09053 | 18 | 25 | 15 | 47  | 48  | 36  | 29 | 44  | 33  |
| SMMPA09054 | 18 | 24 | 15 | 99  | 89  | 81  | 59 | 65  | 59  |
| SMMPA09055 | 22 | 26 | 13 | 62  | 59  | 40  | 54 | 53  | 65  |
| SMMPA09056 | 11 | 16 | 7  | 28  | 21  | 14  | 15 | 26  | 30  |
| SMMPA09057 | 20 | 20 | 11 | 19  | 25  | 26  | 29 | 44  | 46  |
| SMMPA09058 | 6  | 19 | 10 | 15  | 11  | 11  | 11 | 23  | 18  |
| SMMPA09059 | 24 | 17 | 20 | 47  | 43  | 39  | 42 | 44  | 47  |
| SMMPA09060 | 9  | 9  | 9  | 19  | 18  | 18  | 16 | 22  | 16  |
| SMMPA09061 | 15 | 19 | 19 | 29  | 37  | 27  | 29 | 31  | 29  |
| SMMPA09062 | 7  | 3  | 10 | 6   | 10  | 7   | 3  | 9   | 8   |
| SMMPA09063 | 4  | 6  | 10 | 43  | 28  | 20  | 26 | 27  | 21  |
| SMMPA09064 | 7  | 9  | 9  | 50  | 28  | 22  | 17 | 25  | 20  |

|            |    |    |    |     |     |     |    |     |    |
|------------|----|----|----|-----|-----|-----|----|-----|----|
| SMMPA09065 | 13 | 3  | 7  | 61  | 65  | 61  | 19 | 43  | 27 |
| SMMPA09066 | 24 | 19 | 12 | 50  | 41  | 32  | 45 | 39  | 46 |
| SMMPA09067 | 18 | 22 | 14 | 44  | 46  | 42  | 47 | 34  | 57 |
| SMMPA09068 | 11 | 18 | 25 | 44  | 50  | 30  | 41 | 51  | 42 |
| SMMPA09069 | 28 | 21 | 20 | 172 | 143 | 133 | 76 | 102 | 79 |
| SMMPA09070 | 33 | 38 | 31 | 141 | 119 | 107 | 71 | 92  | 69 |
| SMMPA09071 | 30 | 41 | 39 | 74  | 53  | 55  | 47 | 58  | 39 |
| SMMPA09072 | 22 | 35 | 20 | 275 | 228 | 190 | 69 | 96  | 97 |
| SMMPA09073 | 26 | 27 | 23 | 119 | 104 | 94  | 61 | 100 | 72 |
| SMMPA09074 | 17 | 29 | 14 | 50  | 32  | 23  | 30 | 35  | 37 |
| SMMPA09075 | 26 | 29 | 26 | 126 | 102 | 100 | 75 | 102 | 73 |
| SMMPA09076 | 15 | 17 | 16 | 32  | 22  | 15  | 14 | 21  | 20 |
| SMMPA09077 | 35 | 25 | 24 | 33  | 31  | 30  | 32 | 42  | 34 |
| SMMPA09078 | 13 | 24 | 18 | 49  | 41  | 44  | 26 | 38  | 27 |
| SMMPA09079 | 29 | 34 | 36 | 75  | 52  | 62  | 56 | 71  | 68 |
| SMMPA09080 | 26 | 26 | 24 | 50  | 47  | 41  | 38 | 53  | 39 |
| SMMPA09081 | 27 | 35 | 28 | 86  | 86  | 62  | 42 | 46  | 31 |
| SMMPA09082 | 19 | 19 | 15 | 15  | 13  | 16  | 17 | 24  | 38 |
| SMMPA09083 | 28 | 17 | 25 | 31  | 24  | 20  | 18 | 21  | 31 |
| SMMPA09084 | 32 | 37 | 32 | 73  | 72  | 50  | 48 | 60  | 69 |
| SMMPA09085 | 20 | 25 | 22 | 46  | 33  | 31  | 36 | 37  | 28 |
| SMMPA09086 | 35 | 45 | 24 | 46  | 32  | 32  | 26 | 52  | 51 |
| SMMPA09087 | 15 | 25 | 24 | 50  | 56  | 44  | 33 | 46  | 51 |
| SMMPA09088 | 12 | 24 | 17 | 28  | 29  | 33  | 23 | 34  | 30 |
| SMMPA09089 | 24 | 20 | 16 | 33  | 34  | 32  | 16 | 29  | 35 |
| SMMPA09090 | 11 | 5  | 5  | 15  | 15  | 13  | 6  | 9   | 8  |
| SMMPA09091 | 16 | 14 | 16 | 29  | 28  | 30  | 30 | 26  | 23 |
| SMMPA09092 | 16 | 19 | 15 | 17  | 16  | 15  | 24 | 26  | 35 |
| SMMPA09093 | 8  | 7  | 7  | 11  | 9   | 13  | 16 | 16  | 21 |
| SMMPA09094 | 20 | 15 | 19 | 43  | 35  | 27  | 20 | 50  | 26 |
| SMMPA09095 | 18 | 14 | 12 | 12  | 9   | 10  | 12 | 13  | 15 |
| SMMPA09096 | 15 | 15 | 12 | 14  | 16  | 15  | 15 | 25  | 15 |
| SMMPA09097 | 15 | 17 | 9  | 14  | 11  | 12  | 15 | 15  | 20 |
| SMMPA09098 | 10 | 5  | 17 | 12  | 11  | 13  | 13 | 18  | 25 |
| SMMPA09099 | 26 | 28 | 22 | 40  | 37  | 27  | 48 | 56  | 71 |
| SMMPA09100 | 36 | 22 | 24 | 31  | 23  | 31  | 25 | 29  | 30 |
| SMMPA09101 | 16 | 12 | 15 | 19  | 16  | 20  | 9  | 23  | 13 |
| SMMPA09102 | 20 | 18 | 22 | 37  | 38  | 28  | 17 | 17  | 16 |
| SMMPA09103 | 12 | 16 | 13 | 28  | 27  | 26  | 27 | 28  | 27 |
| SMMPA09104 | 6  | 12 | 6  | 19  | 16  | 18  | 11 | 13  | 21 |
| SMMPA09105 | 17 | 20 | 24 | 28  | 39  | 30  | 27 | 27  | 40 |

|            |    |    |    |      |      |      |     |     |     |
|------------|----|----|----|------|------|------|-----|-----|-----|
| SMMPA09106 | 47 | 60 | 27 | 72   | 88   | 61   | 53  | 41  | 70  |
| SMMPA09107 | 32 | 29 | 31 | 81   | 91   | 71   | 38  | 59  | 52  |
| SMMPA09108 | 20 | 9  | 19 | 28   | 20   | 16   | 17  | 23  | 33  |
| SMMPA09109 | 12 | 16 | 14 | 18   | 18   | 11   | 13  | 15  | 19  |
| SMMPA09110 | 16 | 16 | 13 | 110  | 97   | 87   | 32  | 41  | 50  |
| SMMPA09111 | 18 | 23 | 15 | 83   | 68   | 59   | 53  | 73  | 69  |
| SMMPA09112 | 31 | 32 | 24 | 275  | 213  | 197  | 144 | 170 | 133 |
| SMMPA09113 | 28 | 20 | 29 | 220  | 186  | 167  | 95  | 141 | 96  |
| SMMPA09114 | 21 | 29 | 21 | 101  | 94   | 80   | 67  | 70  | 60  |
| SMMPA09115 | 11 | 10 | 7  | 43   | 38   | 46   | 35  | 36  | 35  |
| SMMPA09116 | 20 | 33 | 36 | 42   | 47   | 39   | 24  | 41  | 39  |
| SMMPA09117 | 5  | 6  | 3  | 5    | 8    | 10   | 4   | 5   | 1   |
| SMMPA09118 | 16 | 10 | 7  | 19   | 13   | 11   | 14  | 16  | 11  |
| SMMPA09119 | 36 | 49 | 47 | 40   | 45   | 42   | 48  | 61  | 53  |
| SMMPA09120 | 19 | 20 | 16 | 156  | 128  | 108  | 57  | 89  | 75  |
| SMMPA09121 | 11 | 17 | 21 | 116  | 98   | 85   | 51  | 74  | 84  |
| SMMPA09122 | 21 | 30 | 32 | 56   | 44   | 48   | 35  | 59  | 42  |
| SMMPA09123 | 19 | 11 | 20 | 42   | 44   | 44   | 27  | 32  | 24  |
| SMMPA09124 | 18 | 22 | 21 | 57   | 56   | 41   | 33  | 57  | 34  |
| SMMPA09125 | 11 | 9  | 8  | 26   | 18   | 13   | 15  | 17  | 14  |
| SMMPA09126 | 28 | 27 | 28 | 48   | 45   | 40   | 30  | 40  | 36  |
| SMMPA09127 | 38 | 38 | 39 | 79   | 66   | 68   | 37  | 73  | 70  |
| SMMPA09128 | 17 | 13 | 16 | 35   | 37   | 38   | 24  | 22  | 31  |
| SMMPA09129 | 27 | 26 | 20 | 25   | 26   | 36   | 23  | 28  | 40  |
| SMMPA09130 | 20 | 23 | 12 | 26   | 20   | 18   | 20  | 34  | 25  |
| SMMPA09131 | 14 | 22 | 26 | 72   | 63   | 50   | 47  | 46  | 48  |
| SMMPA09132 | 26 | 29 | 18 | 65   | 80   | 69   | 35  | 56  | 40  |
| SMMPA09133 | 42 | 37 | 25 | 68   | 61   | 60   | 41  | 59  | 53  |
| SMMPA09134 | 8  | 12 | 12 | 26   | 25   | 22   | 23  | 24  | 30  |
| SMMPA09135 | 55 | 48 | 57 | 306  | 277  | 243  | 132 | 188 | 185 |
| SMMPA09136 | 30 | 22 | 22 | 232  | 227  | 180  | 104 | 149 | 130 |
| SMMPA09137 | 27 | 29 | 24 | 64   | 56   | 46   | 33  | 49  | 53  |
| SMMPA09138 | 30 | 32 | 33 | 95   | 112  | 68   | 58  | 61  | 80  |
| SMMPA09139 | 36 | 52 | 48 | 1419 | 1373 | 1329 | 749 | 938 | 781 |
| SMMPA09140 | 18 | 18 | 22 | 234  | 223  | 223  | 153 | 190 | 132 |
| SMMPA09141 | 27 | 26 | 29 | 131  | 134  | 122  | 88  | 126 | 142 |
| SMMPA09142 | 25 | 33 | 16 | 53   | 48   | 34   | 34  | 48  | 41  |
| SMMPA09143 | 36 | 30 | 18 | 182  | 119  | 103  | 80  | 82  | 78  |
| SMMPA09144 | 18 | 13 | 12 | 362  | 352  | 345  | 174 | 207 | 188 |
| SMMPA09145 | 24 | 29 | 19 | 201  | 167  | 134  | 98  | 145 | 127 |
| SMMPA09146 | 5  | 5  | 4  | 119  | 121  | 126  | 56  | 74  | 77  |



|            |    |    |    |     |     |     |     |     |     |
|------------|----|----|----|-----|-----|-----|-----|-----|-----|
| SMMPA09147 | 10 | 14 | 8  | 128 | 111 | 85  | 57  | 85  | 76  |
| SMMPA09148 | 24 | 21 | 14 | 186 | 202 | 177 | 138 | 175 | 149 |
| SMMPA09149 | 12 | 16 | 11 | 83  | 82  | 83  | 40  | 63  | 57  |
| SMMPA09150 | 19 | 27 | 17 | 270 | 285 | 209 | 109 | 148 | 123 |
| SMMPA09151 | 26 | 45 | 28 | 347 | 318 | 263 | 166 | 222 | 215 |
| SMMPA09152 | 12 | 25 | 15 | 290 | 276 | 220 | 154 | 196 | 168 |
| SMMPA09153 | 20 | 20 | 20 | 348 | 305 | 230 | 232 | 297 | 270 |
| SMMPA09154 | 10 | 15 | 15 | 193 | 155 | 114 | 97  | 122 | 104 |
| SMMPA09155 | 50 | 53 | 63 | 75  | 61  | 61  | 31  | 48  | 51  |
| SMMPA09156 | 34 | 33 | 27 | 170 | 144 | 126 | 80  | 101 | 73  |
| SMMPA09157 | 33 | 24 | 31 | 53  | 51  | 44  | 54  | 47  | 48  |
| SMMPA09158 | 54 | 46 | 39 | 28  | 28  | 18  | 24  | 40  | 37  |
| SMMPA09159 | 23 | 17 | 23 | 69  | 58  | 52  | 40  | 53  | 44  |
| SMMPA09160 | 11 | 19 | 14 | 123 | 118 | 97  | 48  | 54  | 57  |
| SMMPA09161 | 9  | 7  | 3  | 22  | 22  | 21  | 11  | 16  | 13  |
| SMMPA09162 | 19 | 23 | 16 | 116 | 94  | 100 | 58  | 71  | 72  |
| SMMPA09163 | 11 | 7  | 7  | 38  | 39  | 31  | 14  | 24  | 28  |
| SMMPA09164 | 9  | 13 | 10 | 38  | 24  | 22  | 20  | 29  | 25  |
| SMMPA09165 | 14 | 17 | 18 | 86  | 87  | 65  | 53  | 56  | 42  |
| SMMPA09166 | 24 | 40 | 29 | 34  | 50  | 46  | 34  | 59  | 50  |
| SMMPA09167 | 12 | 15 | 12 | 114 | 111 | 82  | 50  | 74  | 61  |
| SMMPA09168 | 41 | 40 | 21 | 114 | 127 | 98  | 77  | 85  | 89  |
| SMMPA09169 | 13 | 6  | 11 | 34  | 35  | 27  | 18  | 45  | 34  |
| SMMPA09170 | 16 | 14 | 15 | 41  | 39  | 29  | 29  | 37  | 36  |
| SMMPA09171 | 11 | 13 | 5  | 22  | 24  | 14  | 17  | 25  | 28  |
| SMMPA09172 | 33 | 26 | 27 | 75  | 69  | 50  | 55  | 63  | 57  |
| SMMPA09173 | 9  | 12 | 11 | 28  | 32  | 16  | 37  | 33  | 27  |
| SMMPA09174 | 22 | 18 | 15 | 22  | 25  | 17  | 22  | 36  | 31  |
| SMMPA09175 | 33 | 34 | 22 | 59  | 50  | 42  | 33  | 49  | 35  |
| SMMPA09176 | 19 | 18 | 15 | 63  | 51  | 43  | 43  | 50  | 57  |
| SMMPA09177 | 14 | 14 | 13 | 50  | 46  | 25  | 32  | 34  | 37  |
| SMMPA09178 | 55 | 61 | 47 | 39  | 36  | 29  | 36  | 49  | 54  |
| SMMPA09179 | 8  | 14 | 13 | 49  | 34  | 31  | 17  | 18  | 22  |
| SMMPA09180 | 10 | 14 | 21 | 67  | 64  | 63  | 32  | 38  | 62  |
| SMMPA09181 | 17 | 18 | 11 | 38  | 35  | 30  | 24  | 45  | 37  |
| SMMPA09182 | 18 | 31 | 19 | 67  | 70  | 34  | 22  | 36  | 35  |
| SMMPA09183 | 16 | 12 | 8  | 85  | 81  | 71  | 46  | 53  | 36  |
| SMMPA09184 | 24 | 22 | 20 | 77  | 47  | 66  | 38  | 60  | 51  |
| SMMPA09185 | 19 | 30 | 24 | 110 | 87  | 76  | 42  | 61  | 62  |
| SMMPA09186 | 28 | 25 | 22 | 255 | 237 | 173 | 92  | 127 | 124 |
| SMMPA09187 | 35 | 32 | 20 | 192 | 159 | 129 | 74  | 113 | 110 |

|            |    |    |    |     |     |     |     |     |     |
|------------|----|----|----|-----|-----|-----|-----|-----|-----|
| SMMPA09188 | 31 | 34 | 32 | 54  | 55  | 62  | 43  | 37  | 46  |
| SMMPA09189 | 14 | 24 | 27 | 153 | 122 | 99  | 51  | 63  | 65  |
| SMMPA09190 | 22 | 23 | 13 | 71  | 49  | 50  | 25  | 36  | 40  |
| SMMPA09191 | 13 | 17 | 17 | 47  | 46  | 37  | 26  | 24  | 31  |
| SMMPA09192 | 28 | 24 | 29 | 97  | 74  | 72  | 63  | 59  | 64  |
| SMMPA09193 | 10 | 13 | 12 | 54  | 70  | 56  | 19  | 23  | 24  |
| SMMPA09194 | 8  | 6  | 5  | 30  | 35  | 27  | 15  | 21  | 11  |
| SMMPA09195 | 10 | 13 | 9  | 55  | 71  | 56  | 28  | 41  | 35  |
| SMMPA09196 | 6  | 8  | 5  | 23  | 25  | 17  | 12  | 23  | 22  |
| SMMPA09197 | 22 | 13 | 17 | 51  | 66  | 49  | 38  | 29  | 40  |
| SMMPA09198 | 23 | 15 | 24 | 67  | 57  | 62  | 31  | 43  | 53  |
| SMMPA09199 | 22 | 12 | 23 | 108 | 92  | 68  | 63  | 78  | 72  |
| SMMPA09200 | 40 | 39 | 33 | 55  | 55  | 50  | 40  | 56  | 65  |
| SMMPA09201 | 33 | 32 | 30 | 50  | 39  | 43  | 33  | 49  | 54  |
| SMMPA09202 | 37 | 24 | 36 | 89  | 78  | 81  | 74  | 79  | 58  |
| SMMPA09203 | 41 | 39 | 41 | 273 | 231 | 173 | 111 | 150 | 140 |
| SMMPA09204 | 30 | 23 | 25 | 95  | 65  | 48  | 30  | 37  | 34  |
| SMMPA09205 | 15 | 19 | 10 | 29  | 20  | 18  | 19  | 21  | 34  |
| SMMPA09206 | 22 | 20 | 18 | 50  | 48  | 37  | 30  | 43  | 42  |
| SMMPA09207 | 15 | 14 | 15 | 51  | 53  | 28  | 30  | 41  | 42  |
| SMMPA09208 | 12 | 15 | 8  | 78  | 51  | 49  | 25  | 33  | 37  |
| SMMPA09209 | 19 | 22 | 21 | 49  | 37  | 35  | 30  | 50  | 46  |
| SMMPA09210 | 23 | 38 | 16 | 76  | 65  | 57  | 54  | 76  | 59  |
| SMMPA09211 | 25 | 27 | 20 | 93  | 100 | 76  | 60  | 93  | 97  |
| SMMPA09212 | 13 | 5  | 8  | 26  | 15  | 16  | 12  | 30  | 24  |
| SMMPA09213 | 35 | 30 | 26 | 52  | 63  | 45  | 48  | 57  | 48  |
| SMMPA09214 | 21 | 22 | 18 | 31  | 31  | 18  | 25  | 27  | 29  |
| SMMPA09215 | 15 | 24 | 13 | 39  | 34  | 40  | 21  | 40  | 26  |
| SMMPA09216 | 32 | 29 | 26 | 558 | 512 | 394 | 318 | 416 | 345 |
| SMMPA09217 | 31 | 19 | 20 | 123 | 101 | 73  | 57  | 64  | 55  |
| SMMPA09218 | 16 | 21 | 15 | 32  | 37  | 34  | 20  | 28  | 36  |
| SMMPA09219 | 14 | 23 | 12 | 33  | 37  | 24  | 16  | 28  | 30  |
| SMMPA09220 | 41 | 25 | 23 | 74  | 82  | 79  | 73  | 88  | 76  |
| SMMPA09221 | 41 | 41 | 34 | 130 | 136 | 100 | 55  | 84  | 77  |
| SMMPA09222 | 7  | 10 | 7  | 31  | 29  | 16  | 14  | 18  | 22  |
| SMMPA09223 | 19 | 19 | 11 | 42  | 45  | 27  | 29  | 33  | 19  |
| SMMPA09224 | 7  | 14 | 3  | 19  | 21  | 22  | 6   | 18  | 17  |
| SMMPA09225 | 39 | 40 | 36 | 44  | 65  | 38  | 45  | 40  | 41  |
| SMMPA09226 | 29 | 20 | 21 | 38  | 27  | 37  | 54  | 67  | 79  |
| SMMPA09227 | 23 | 16 | 23 | 99  | 102 | 67  | 67  | 67  | 66  |
| SMMPA09228 | 29 | 34 | 28 | 348 | 287 | 243 | 156 | 244 | 176 |

|            |    |    |    |     |     |     |     |     |     |
|------------|----|----|----|-----|-----|-----|-----|-----|-----|
| SMMPA09229 | 14 | 22 | 13 | 83  | 79  | 55  | 64  | 103 | 84  |
| SMMPA09230 | 41 | 28 | 44 | 383 | 305 | 264 | 168 | 210 | 184 |
| SMMPA09231 | 44 | 39 | 31 | 562 | 494 | 391 | 227 | 296 | 251 |
| SMMPA09232 | 8  | 11 | 6  | 90  | 91  | 80  | 54  | 73  | 59  |
| SMMPA09233 | 39 | 31 | 22 | 400 | 360 | 288 | 172 | 219 | 175 |
| SMMPA09234 | 28 | 23 | 26 | 370 | 283 | 226 | 150 | 196 | 198 |
| SMMPA09235 | 12 | 9  | 11 | 26  | 17  | 13  | 14  | 26  | 18  |
| SMMPA09236 | 9  | 15 | 14 | 15  | 11  | 17  | 17  | 20  | 23  |
| SMMPA09237 | 10 | 12 | 5  | 10  | 9   | 6   | 8   | 14  | 12  |
| SMMPA09238 | 14 | 17 | 14 | 46  | 34  | 33  | 28  | 48  | 56  |
| SMMPA09239 | 12 | 18 | 11 | 164 | 122 | 115 | 105 | 113 | 123 |
| SMMPA09240 | 15 | 15 | 15 | 71  | 69  | 52  | 39  | 56  | 50  |
| SMMPA09241 | 8  | 12 | 9  | 134 | 128 | 107 | 80  | 76  | 79  |
| SMMPA09242 | 17 | 10 | 14 | 49  | 42  | 51  | 23  | 32  | 37  |
| SMMPA09243 | 25 | 18 | 15 | 89  | 88  | 57  | 50  | 47  | 58  |
| SMMPA09244 | 61 | 46 | 48 | 94  | 92  | 81  | 55  | 81  | 69  |
| SMMPA09245 | 43 | 53 | 36 | 87  | 97  | 84  | 58  | 85  | 95  |
| SMMPA09246 | 13 | 11 | 14 | 29  | 38  | 30  | 15  | 27  | 25  |
| SMMPA09247 | 20 | 32 | 19 | 137 | 115 | 115 | 78  | 119 | 88  |
| SMMPA09248 | 27 | 27 | 23 | 34  | 62  | 50  | 30  | 51  | 37  |
| SMMPA09249 | 40 | 54 | 38 | 129 | 106 | 96  | 81  | 100 | 87  |
| SMMPA09250 | 26 | 35 | 28 | 95  | 77  | 67  | 52  | 50  | 64  |
| SMMPA09251 | 40 | 26 | 33 | 149 | 149 | 105 | 96  | 127 | 121 |
| SMMPA09252 | 23 | 29 | 20 | 29  | 28  | 31  | 35  | 37  | 52  |
| SMMPA09253 | 28 | 34 | 35 | 120 | 125 | 93  | 90  | 133 | 109 |
| SMMPA09254 | 23 | 33 | 31 | 54  | 64  | 47  | 52  | 73  | 78  |
| SMMPA09255 | 35 | 31 | 26 | 41  | 36  | 45  | 29  | 36  | 32  |
| SMMPA09256 | 11 | 19 | 15 | 105 | 85  | 62  | 50  | 50  | 55  |
| SMMPA09257 | 38 | 43 | 34 | 543 | 485 | 402 | 229 | 315 | 280 |
| SMMPA09258 | 19 | 28 | 21 | 109 | 89  | 83  | 50  | 73  | 59  |
| SMMPA09259 | 18 | 22 | 15 | 30  | 28  | 26  | 29  | 25  | 28  |
| SMMPA09260 | 14 | 9  | 9  | 21  | 23  | 13  | 22  | 24  | 30  |
| SMMPA09261 | 24 | 16 | 10 | 48  | 42  | 30  | 28  | 40  | 40  |
| SMMPA09262 | 28 | 29 | 24 | 90  | 61  | 58  | 59  | 59  | 58  |
| SMMPA09263 | 14 | 27 | 26 | 48  | 35  | 33  | 29  | 41  | 48  |
| SMMPA09264 | 25 | 29 | 44 | 44  | 37  | 47  | 36  | 51  | 38  |
| SMMPA09265 | 13 | 14 | 13 | 51  | 47  | 35  | 22  | 35  | 35  |
| SMMPA09266 | 17 | 21 | 21 | 83  | 64  | 55  | 48  | 64  | 45  |
| SMMPA09267 | 12 | 12 | 11 | 26  | 30  | 20  | 27  | 29  | 27  |
| SMMPA09268 | 42 | 47 | 35 | 66  | 56  | 51  | 59  | 75  | 61  |
| SMMPA09269 | 10 | 7  | 15 | 32  | 28  | 27  | 33  | 36  | 34  |

|            |    |    |    |     |     |     |     |     |     |
|------------|----|----|----|-----|-----|-----|-----|-----|-----|
| SMMPA09270 | 13 | 23 | 17 | 29  | 23  | 28  | 41  | 39  | 49  |
| SMMPA09271 | 9  | 3  | 11 | 38  | 41  | 26  | 22  | 25  | 21  |
| SMMPA09272 | 25 | 28 | 27 | 61  | 69  | 55  | 19  | 48  | 40  |
| SMMPA09273 | 21 | 19 | 20 | 383 | 349 | 336 | 195 | 264 | 222 |
| SMMPA09274 | 9  | 10 | 14 | 17  | 16  | 16  | 19  | 16  | 12  |
| SMMPA09275 | 25 | 19 | 18 | 42  | 32  | 24  | 24  | 35  | 32  |
| SMMPA09276 | 33 | 32 | 29 | 117 | 108 | 63  | 67  | 69  | 81  |
| SMMPA09277 | 33 | 33 | 34 | 404 | 344 | 247 | 143 | 230 | 145 |
| SMMPA09278 | 32 | 30 | 29 | 93  | 79  | 61  | 82  | 125 | 102 |
| SMMPA09279 | 36 | 42 | 41 | 68  | 64  | 49  | 67  | 74  | 75  |
| SMMPA09280 | 22 | 21 | 19 | 152 | 126 | 101 | 112 | 116 | 96  |
| SMMPA09281 | 42 | 53 | 54 | 298 | 283 | 240 | 152 | 206 | 168 |
| SMMPA09282 | 31 | 39 | 30 | 187 | 172 | 160 | 54  | 68  | 62  |
| SMMPA09283 | 36 | 43 | 30 | 71  | 59  | 60  | 36  | 47  | 54  |
| SMMPA09284 | 16 | 12 | 11 | 104 | 111 | 66  | 37  | 61  | 30  |
| SMMPA09285 | 23 | 9  | 17 | 43  | 53  | 43  | 30  | 37  | 45  |
| SMMPA09286 | 25 | 21 | 31 | 50  | 44  | 35  | 45  | 56  | 54  |
| SMMPA09287 | 14 | 11 | 8  | 97  | 85  | 71  | 38  | 59  | 51  |
| SMMPA09288 | 22 | 25 | 18 | 58  | 59  | 56  | 42  | 51  | 61  |
| SMMPA09289 | 19 | 18 | 20 | 62  | 32  | 38  | 33  | 45  | 42  |
| SMMPA09290 | 9  | 12 | 11 | 63  | 53  | 45  | 33  | 46  | 47  |
| SMMPA09291 | 13 | 15 | 13 | 36  | 39  | 35  | 31  | 45  | 44  |
| SMMPA09292 | 36 | 31 | 32 | 96  | 93  | 81  | 79  | 93  | 88  |
| SMMPA09293 | 30 | 20 | 22 | 52  | 65  | 43  | 25  | 57  | 39  |
| SMMPA09294 | 24 | 25 | 14 | 36  | 38  | 37  | 23  | 24  | 31  |
| SMMPA09295 | 32 | 31 | 21 | 62  | 62  | 44  | 32  | 36  | 38  |
| SMMPA09296 | 27 | 19 | 21 | 67  | 64  | 36  | 24  | 30  | 37  |
| SMMPA09297 | 10 | 13 | 9  | 13  | 19  | 12  | 7   | 15  | 25  |
| SMMPA09298 | 15 | 17 | 11 | 24  | 16  | 19  | 13  | 22  | 21  |
| SMMPA09299 | 24 | 22 | 22 | 48  | 39  | 29  | 21  | 28  | 26  |
| SMMPA09300 | 31 | 40 | 33 | 101 | 78  | 67  | 46  | 50  | 47  |
| SMMPA09301 | 16 | 22 | 15 | 29  | 35  | 24  | 21  | 28  | 32  |
| SMMPA09302 | 29 | 23 | 35 | 44  | 45  | 31  | 32  | 46  | 35  |
| SMMPA09303 | 39 | 26 | 30 | 49  | 27  | 34  | 25  | 41  | 48  |
| SMMPA09304 | 25 | 27 | 28 | 90  | 89  | 65  | 53  | 64  | 49  |
| SMMPA09305 | 22 | 19 | 17 | 46  | 55  | 36  | 50  | 66  | 50  |
| SMMPA09306 | 12 | 6  | 14 | 22  | 30  | 16  | 22  | 41  | 47  |
| SMMPA09307 | 23 | 13 | 18 | 48  | 42  | 25  | 32  | 40  | 37  |
| SMMPA09308 | 4  | 1  | 4  | 7   | 6   | 7   | 14  | 7   | 4   |
| SMMPA09309 | 37 | 24 | 31 | 64  | 58  | 55  | 50  | 51  | 73  |
| SMMPA09310 | 14 | 10 | 11 | 22  | 18  | 20  | 19  | 18  | 21  |

|            |    |    |    |     |     |     |     |     |     |
|------------|----|----|----|-----|-----|-----|-----|-----|-----|
| SMMPA09311 | 11 | 12 | 12 | 25  | 39  | 14  | 9   | 23  | 21  |
| SMMPA09312 | 12 | 12 | 12 | 15  | 24  | 23  | 19  | 23  | 31  |
| SMMPA09313 | 31 | 23 | 15 | 56  | 49  | 27  | 43  | 46  | 50  |
| SMMPA09314 | 17 | 14 | 12 | 56  | 58  | 55  | 28  | 38  | 30  |
| SMMPA09315 | 34 | 25 | 18 | 61  | 53  | 50  | 52  | 54  | 52  |
| SMMPA09316 | 29 | 17 | 16 | 118 | 83  | 82  | 32  | 56  | 58  |
| SMMPA09317 | 19 | 22 | 20 | 55  | 35  | 36  | 25  | 41  | 47  |
| SMMPA09318 | 16 | 19 | 23 | 39  | 46  | 24  | 28  | 30  | 20  |
| SMMPA09319 | 14 | 20 | 10 | 64  | 73  | 46  | 36  | 45  | 34  |
| SMMPA09320 | 21 | 23 | 26 | 75  | 57  | 55  | 37  | 42  | 40  |
| SMMPA09321 | 21 | 28 | 17 | 65  | 47  | 36  | 32  | 40  | 42  |
| SMMPA09322 | 13 | 16 | 10 | 59  | 42  | 43  | 22  | 35  | 33  |
| SMMPA09323 | 10 | 20 | 14 | 61  | 56  | 36  | 44  | 39  | 63  |
| SMMPA09324 | 8  | 14 | 10 | 28  | 17  | 26  | 14  | 20  | 17  |
| SMMPA09325 | 16 | 18 | 18 | 30  | 21  | 27  | 27  | 26  | 38  |
| SMMPA09326 | 26 | 22 | 29 | 32  | 21  | 20  | 25  | 34  | 40  |
| SMMPA09327 | 28 | 35 | 30 | 38  | 18  | 34  | 23  | 44  | 38  |
| SMMPA09328 | 39 | 47 | 30 | 164 | 171 | 128 | 114 | 140 | 146 |
| SMMPA09329 | 20 | 24 | 13 | 54  | 40  | 29  | 23  | 34  | 38  |
| SMMPA09330 | 71 | 78 | 75 | 50  | 37  | 56  | 53  | 82  | 86  |
| SMMPA09331 | 19 | 9  | 15 | 21  | 30  | 19  | 14  | 14  | 25  |
| SMMPA09332 | 10 | 12 | 9  | 34  | 31  | 34  | 22  | 33  | 25  |
| SMMPA09333 | 17 | 18 | 25 | 29  | 18  | 18  | 21  | 16  | 18  |
| SMMPA09334 | 3  | 2  | 3  | 2   | 4   | 7   | 7   | 1   | 7   |
| SMMPA09335 | 18 | 18 | 21 | 18  | 22  | 28  | 15  | 15  | 20  |
| SMMPA09336 | 29 | 20 | 20 | 104 | 97  | 77  | 61  | 78  | 71  |
| SMMPA09337 | 10 | 7  | 9  | 17  | 8   | 12  | 11  | 8   | 8   |
| SMMPA09338 | 26 | 32 | 15 | 799 | 804 | 777 | 339 | 442 | 399 |
| SMMPA09339 | 16 | 16 | 19 | 48  | 40  | 20  | 37  | 35  | 32  |
| SMMPA09340 | 5  | 10 | 10 | 17  | 18  | 20  | 11  | 10  | 6   |
| SMMPA09341 | 19 | 12 | 11 | 43  | 35  | 31  | 19  | 21  | 26  |
| SMMPA09342 | 28 | 45 | 42 | 144 | 131 | 109 | 67  | 88  | 97  |
| SMMPA09343 | 23 | 30 | 18 | 60  | 54  | 36  | 36  | 56  | 49  |
| SMMPA09344 | 30 | 21 | 23 | 114 | 99  | 78  | 58  | 82  | 74  |
| SMMPA09345 | 25 | 36 | 41 | 51  | 62  | 49  | 44  | 34  | 37  |
| SMMPA09346 | 24 | 14 | 23 | 151 | 148 | 85  | 77  | 90  | 78  |
| SMMPA09347 | 5  | 8  | 8  | 23  | 20  | 18  | 22  | 23  | 21  |
| SMMPA09348 | 38 | 33 | 18 | 129 | 106 | 93  | 52  | 57  | 53  |
| SMMPA09349 | 14 | 16 | 18 | 62  | 69  | 60  | 20  | 35  | 32  |
| SMMPA09350 | 34 | 30 | 37 | 132 | 121 | 82  | 38  | 82  | 55  |
| SMMPA09351 | 42 | 37 | 30 | 137 | 134 | 98  | 78  | 98  | 78  |

|            |     |     |    |     |     |     |     |     |     |
|------------|-----|-----|----|-----|-----|-----|-----|-----|-----|
| SMMPA09352 | 17  | 30  | 22 | 74  | 66  | 60  | 43  | 46  | 50  |
| SMMPA09353 | 24  | 12  | 23 | 86  | 76  | 66  | 47  | 61  | 52  |
| SMMPA09354 | 18  | 27  | 7  | 51  | 44  | 32  | 26  | 39  | 48  |
| SMMPA09355 | 21  | 18  | 14 | 55  | 44  | 40  | 33  | 49  | 60  |
| SMMPA09356 | 7   | 5   | 7  | 30  | 26  | 19  | 17  | 24  | 19  |
| SMMPA09357 | 19  | 30  | 18 | 35  | 28  | 26  | 24  | 20  | 27  |
| SMMPA09358 | 19  | 26  | 19 | 77  | 73  | 63  | 35  | 39  | 38  |
| SMMPA09359 | 0   | 3   | 3  | 2   | 4   | 2   | 4   | 3   | 2   |
| SMMPA09360 | 9   | 12  | 10 | 9   | 4   | 14  | 12  | 16  | 9   |
| SMMPA09361 | 16  | 13  | 21 | 34  | 31  | 25  | 29  | 24  | 22  |
| SMMPA09362 | 37  | 39  | 41 | 36  | 49  | 32  | 41  | 42  | 61  |
| SMMPA09363 | 9   | 13  | 15 | 8   | 5   | 9   | 13  | 12  | 20  |
| SMMPA09364 | 12  | 21  | 13 | 154 | 139 | 117 | 73  | 89  | 83  |
| SMMPA09365 | 36  | 31  | 25 | 148 | 112 | 103 | 34  | 59  | 45  |
| SMMPA09366 | 15  | 17  | 7  | 41  | 23  | 31  | 16  | 28  | 22  |
| SMMPA09367 | 19  | 23  | 18 | 41  | 34  | 30  | 32  | 34  | 39  |
| SMMPA09368 | 34  | 35  | 24 | 81  | 53  | 40  | 35  | 56  | 50  |
| SMMPA09369 | 9   | 8   | 8  | 19  | 19  | 8   | 12  | 24  | 19  |
| SMMPA09370 | 26  | 20  | 21 | 245 | 237 | 198 | 84  | 125 | 94  |
| SMMPA09371 | 33  | 34  | 31 | 212 | 164 | 125 | 65  | 136 | 105 |
| SMMPA09372 | 4   | 3   | 5  | 50  | 34  | 41  | 30  | 39  | 34  |
| SMMPA09373 | 12  | 12  | 8  | 130 | 129 | 112 | 49  | 73  | 53  |
| SMMPA09374 | 110 | 122 | 84 | 83  | 66  | 69  | 84  | 96  | 94  |
| SMMPA09375 | 19  | 21  | 26 | 305 | 273 | 232 | 134 | 161 | 164 |
| SMMPA09376 | 10  | 8   | 10 | 47  | 51  | 37  | 21  | 26  | 29  |
| SMMPA09377 | 34  | 29  | 15 | 229 | 196 | 172 | 77  | 116 | 96  |
| SMMPA09378 | 22  | 22  | 20 | 137 | 119 | 104 | 62  | 67  | 53  |
| SMMPA09379 | 11  | 10  | 11 | 39  | 39  | 41  | 13  | 19  | 17  |
| SMMPA09380 | 25  | 23  | 19 | 47  | 52  | 43  | 31  | 48  | 39  |
| SMMPA09381 | 18  | 22  | 8  | 37  | 39  | 26  | 19  | 21  | 13  |
| SMMPA09382 | 0   | 0   | 1  | 1   | 1   | 2   | 0   | 1   | 1   |
| SMMPA09383 | 23  | 20  | 14 | 29  | 36  | 29  | 35  | 43  | 54  |
| SMMPA09384 | 37  | 25  | 23 | 84  | 65  | 56  | 67  | 83  | 82  |
| SMMPA09385 | 36  | 34  | 27 | 42  | 23  | 30  | 31  | 48  | 48  |
| SMMPA09386 | 43  | 54  | 43 | 90  | 72  | 63  | 61  | 69  | 74  |
| SMMPA09387 | 41  | 29  | 23 | 44  | 41  | 30  | 37  | 65  | 51  |
| SMMPA09388 | 12  | 15  | 18 | 34  | 27  | 40  | 27  | 39  | 39  |
| SMMPA09389 | 37  | 30  | 26 | 35  | 35  | 31  | 33  | 39  | 33  |
| SMMPA09390 | 25  | 20  | 21 | 27  | 20  | 15  | 21  | 32  | 27  |
| SMMPA09391 | 18  | 20  | 26 | 30  | 38  | 27  | 31  | 38  | 38  |
| SMMPA09392 | 23  | 29  | 26 | 45  | 64  | 40  | 53  | 57  | 66  |

|            |    |    |    |     |     |     |     |     |     |
|------------|----|----|----|-----|-----|-----|-----|-----|-----|
| SMMPA09393 | 35 | 21 | 30 | 37  | 41  | 26  | 36  | 47  | 49  |
| SMMPA09394 | 30 | 26 | 18 | 98  | 81  | 68  | 50  | 57  | 77  |
| SMMPA09395 | 20 | 19 | 20 | 43  | 35  | 32  | 24  | 23  | 30  |
| SMMPA09396 | 7  | 10 | 5  | 18  | 10  | 10  | 7   | 18  | 14  |
| SMMPA09397 | 15 | 11 | 16 | 30  | 25  | 24  | 21  | 20  | 18  |
| SMMPA09398 | 12 | 7  | 16 | 15  | 10  | 15  | 15  | 16  | 12  |
| SMMPA09399 | 17 | 21 | 20 | 21  | 31  | 21  | 16  | 21  | 21  |
| SMMPA09400 | 21 | 38 | 30 | 115 | 102 | 73  | 61  | 91  | 66  |
| SMMPA09401 | 13 | 9  | 14 | 14  | 23  | 21  | 16  | 29  | 21  |
| SMMPA09402 | 18 | 15 | 10 | 36  | 31  | 30  | 25  | 18  | 23  |
| SMMPA09403 | 26 | 29 | 16 | 100 | 81  | 85  | 64  | 69  | 61  |
| SMMPA09404 | 48 | 49 | 46 | 235 | 257 | 215 | 94  | 145 | 124 |
| SMMPA09405 | 24 | 20 | 22 | 54  | 46  | 45  | 17  | 26  | 32  |
| SMMPA09406 | 22 | 10 | 17 | 71  | 58  | 39  | 23  | 23  | 52  |
| SMMPA09407 | 37 | 30 | 31 | 103 | 104 | 79  | 49  | 61  | 75  |
| SMMPA09408 | 24 | 30 | 24 | 79  | 81  | 60  | 30  | 39  | 59  |
| SMMPA09409 | 7  | 13 | 9  | 59  | 55  | 53  | 8   | 15  | 20  |
| SMMPA09410 | 25 | 24 | 28 | 70  | 61  | 50  | 37  | 48  | 54  |
| SMMPA09411 | 5  | 4  | 6  | 9   | 2   | 4   | 7   | 12  | 9   |
| SMMPA09412 | 18 | 21 | 18 | 135 | 142 | 118 | 38  | 42  | 55  |
| SMMPA09413 | 25 | 24 | 28 | 57  | 45  | 22  | 36  | 39  | 50  |
| SMMPA09414 | 13 | 20 | 17 | 47  | 41  | 26  | 18  | 23  | 24  |
| SMMPA09415 | 41 | 55 | 39 | 186 | 202 | 130 | 107 | 141 | 135 |
| SMMPA09416 | 55 | 64 | 42 | 124 | 114 | 112 | 79  | 107 | 72  |
| SMMPA09417 | 44 | 45 | 46 | 218 | 162 | 164 | 132 | 136 | 149 |
| SMMPA09418 | 4  | 15 | 10 | 43  | 28  | 21  | 32  | 36  | 31  |
| SMMPA09419 | 47 | 62 | 30 | 211 | 185 | 143 | 121 | 144 | 140 |
| SMMPA09420 | 32 | 35 | 26 | 185 | 127 | 111 | 82  | 124 | 115 |
| SMMPA09421 | 35 | 36 | 32 | 149 | 141 | 122 | 101 | 125 | 109 |
| SMMPA09422 | 45 | 42 | 24 | 119 | 97  | 67  | 85  | 102 | 96  |
| SMMPA09423 | 11 | 6  | 13 | 48  | 43  | 40  | 35  | 38  | 38  |
| SMMPA09424 | 17 | 17 | 21 | 208 | 217 | 157 | 71  | 85  | 73  |
| SMMPA09425 | 21 | 19 | 29 | 214 | 255 | 149 | 55  | 62  | 84  |
| SMMPA09426 | 66 | 66 | 53 | 295 | 261 | 174 | 121 | 157 | 166 |
| SMMPA09427 | 7  | 8  | 3  | 51  | 64  | 44  | 28  | 36  | 40  |
| SMMPA09428 | 7  | 13 | 6  | 28  | 31  | 14  | 16  | 21  | 29  |
| SMMPA09429 | 13 | 19 | 16 | 175 | 173 | 100 | 56  | 76  | 51  |
| SMMPA09430 | 15 | 20 | 23 | 226 | 185 | 137 | 102 | 144 | 102 |
| SMMPA09431 | 23 | 19 | 24 | 166 | 174 | 122 | 60  | 72  | 85  |
| SMMPA09432 | 6  | 12 | 10 | 215 | 185 | 162 | 56  | 91  | 79  |
| SMMPA09433 | 9  | 7  | 13 | 238 | 255 | 203 | 139 | 147 | 170 |

|            |    |    |    |     |     |     |     |     |     |
|------------|----|----|----|-----|-----|-----|-----|-----|-----|
| SMMPA09434 | 25 | 21 | 21 | 65  | 58  | 52  | 48  | 41  | 43  |
| SMMPA09435 | 15 | 20 | 18 | 14  | 24  | 18  | 24  | 24  | 24  |
| SMMPA09436 | 27 | 37 | 23 | 110 | 102 | 71  | 72  | 84  | 90  |
| SMMPA09437 | 25 | 29 | 19 | 88  | 89  | 79  | 47  | 35  | 46  |
| SMMPA09438 | 13 | 10 | 9  | 26  | 33  | 29  | 23  | 21  | 29  |
| SMMPA09439 | 37 | 36 | 29 | 318 | 271 | 233 | 98  | 113 | 132 |
| SMMPA09440 | 36 | 43 | 30 | 93  | 90  | 80  | 38  | 54  | 44  |
| SMMPA09441 | 24 | 18 | 23 | 52  | 40  | 39  | 29  | 34  | 46  |
| SMMPA09442 | 22 | 12 | 15 | 33  | 23  | 26  | 25  | 35  | 24  |
| SMMPA09443 | 19 | 21 | 26 | 40  | 33  | 40  | 14  | 32  | 34  |
| SMMPA09444 | 9  | 11 | 15 | 22  | 25  | 15  | 11  | 21  | 18  |
| SMMPA09445 | 16 | 16 | 12 | 27  | 16  | 23  | 10  | 17  | 19  |
| SMMPA09446 | 24 | 28 | 25 | 147 | 136 | 132 | 72  | 81  | 79  |
| SMMPA09447 | 9  | 16 | 18 | 53  | 64  | 41  | 27  | 35  | 35  |
| SMMPA09448 | 25 | 31 | 24 | 24  | 33  | 25  | 24  | 32  | 28  |
| SMMPA09449 | 16 | 22 | 21 | 191 | 176 | 145 | 80  | 97  | 96  |
| SMMPA09450 | 9  | 7  | 9  | 35  | 42  | 38  | 13  | 18  | 14  |
| SMMPA09451 | 9  | 7  | 7  | 50  | 68  | 61  | 22  | 38  | 11  |
| SMMPA09452 | 19 | 22 | 12 | 173 | 155 | 131 | 44  | 63  | 65  |
| SMMPA09453 | 5  | 7  | 10 | 5   | 8   | 8   | 15  | 13  | 14  |
| SMMPA09454 | 42 | 39 | 36 | 131 | 143 | 102 | 90  | 100 | 100 |
| SMMPA09455 | 12 | 15 | 10 | 21  | 12  | 13  | 16  | 20  | 28  |
| SMMPA09456 | 38 | 32 | 33 | 209 | 182 | 148 | 136 | 157 | 152 |
| SMMPA09457 | 12 | 11 | 19 | 37  | 72  | 63  | 52  | 32  | 43  |
| SMMPA09458 | 18 | 18 | 25 | 23  | 32  | 27  | 25  | 45  | 35  |
| SMMPA09459 | 7  | 4  | 8  | 42  | 29  | 22  | 20  | 15  | 16  |
| SMMPA09460 | 11 | 19 | 11 | 71  | 56  | 52  | 53  | 47  | 60  |
| SMMPA09461 | 15 | 12 | 18 | 92  | 88  | 44  | 37  | 49  | 51  |
| SMMPA09462 | 17 | 19 | 20 | 74  | 67  | 60  | 45  | 46  | 38  |
| SMMPA09463 | 15 | 10 | 14 | 88  | 90  | 55  | 34  | 55  | 54  |
| SMMPA09464 | 14 | 15 | 19 | 23  | 24  | 34  | 16  | 25  | 24  |
| SMMPA09465 | 8  | 20 | 10 | 34  | 43  | 26  | 39  | 38  | 36  |
| SMMPA09466 | 33 | 31 | 35 | 60  | 40  | 38  | 40  | 53  | 54  |
| SMMPA09467 | 31 | 22 | 17 | 60  | 72  | 70  | 35  | 36  | 45  |
| SMMPA09468 | 22 | 20 | 19 | 45  | 48  | 52  | 19  | 36  | 44  |
| SMMPA09469 | 6  | 14 | 15 | 41  | 42  | 27  | 21  | 24  | 30  |
| SMMPA09470 | 14 | 12 | 18 | 89  | 74  | 62  | 47  | 53  | 49  |
| SMMPA09471 | 12 | 13 | 6  | 210 | 188 | 202 | 90  | 127 | 92  |
| SMMPA09472 | 22 | 24 | 26 | 272 | 237 | 201 | 85  | 113 | 92  |
| SMMPA09473 | 11 | 14 | 15 | 145 | 126 | 134 | 53  | 85  | 70  |
| SMMPA09474 | 31 | 32 | 18 | 144 | 149 | 113 | 94  | 94  | 108 |



|            |    |    |    |     |     |     |     |     |     |
|------------|----|----|----|-----|-----|-----|-----|-----|-----|
| SMMPA09475 | 24 | 21 | 20 | 139 | 114 | 90  | 55  | 83  | 97  |
| SMMPA09476 | 27 | 27 | 29 | 382 | 340 | 295 | 133 | 180 | 160 |
| SMMPA09477 | 17 | 26 | 25 | 101 | 89  | 95  | 49  | 85  | 68  |
| SMMPA09478 | 29 | 41 | 35 | 422 | 412 | 319 | 162 | 216 | 169 |
| SMMPA09479 | 25 | 26 | 15 | 208 | 226 | 153 | 84  | 111 | 104 |
| SMMPA09480 | 32 | 32 | 24 | 366 | 321 | 259 | 135 | 166 | 153 |
| SMMPA09481 | 17 | 12 | 14 | 21  | 24  | 18  | 13  | 19  | 13  |
| SMMPA09482 | 9  | 5  | 7  | 9   | 21  | 9   | 4   | 18  | 8   |
| SMMPA09483 | 11 | 20 | 16 | 41  | 39  | 26  | 18  | 19  | 23  |
| SMMPA09484 | 3  | 5  | 3  | 5   | 8   | 3   | 4   | 4   | 2   |
| SMMPA09485 | 0  | 1  | 2  | 2   | 2   | 2   | 1   | 3   | 1   |
| SMMPA09486 | 2  | 7  | 3  | 4   | 5   | 3   | 3   | 6   | 5   |
| SMMPA09487 | 3  | 4  | 4  | 4   | 9   | 6   | 7   | 6   | 7   |
| SMMPA09488 | 15 | 18 | 24 | 12  | 11  | 18  | 9   | 15  | 19  |
| SMMPA09489 | 24 | 22 | 15 | 28  | 28  | 17  | 19  | 32  | 18  |
| SMMPA09490 | 30 | 28 | 19 | 34  | 35  | 22  | 22  | 31  | 52  |
| SMMPA09491 | 52 | 31 | 42 | 74  | 67  | 61  | 49  | 57  | 68  |
| SMMPA09492 | 12 | 30 | 21 | 76  | 71  | 58  | 38  | 45  | 37  |
| SMMPA09493 | 13 | 13 | 17 | 95  | 79  | 48  | 34  | 56  | 38  |
| SMMPA09494 | 29 | 15 | 8  | 51  | 45  | 38  | 27  | 30  | 25  |
| SMMPA09495 | 49 | 36 | 48 | 126 | 97  | 80  | 57  | 75  | 77  |
| SMMPA09496 | 27 | 28 | 18 | 58  | 55  | 51  | 31  | 45  | 43  |
| SMMPA09497 | 7  | 14 | 6  | 77  | 63  | 46  | 29  | 26  | 28  |
| SMMPA09498 | 34 | 23 | 27 | 88  | 73  | 58  | 43  | 45  | 44  |
| SMMPA09499 | 19 | 28 | 18 | 40  | 42  | 31  | 47  | 68  | 58  |
| SMMPA09500 | 7  | 14 | 7  | 62  | 52  | 48  | 16  | 38  | 25  |
| SMMPA09501 | 13 | 15 | 8  | 67  | 42  | 35  | 22  | 39  | 42  |
| SMMPA09502 | 23 | 17 | 13 | 17  | 29  | 15  | 17  | 26  | 30  |
| SMMPA09503 | 9  | 18 | 18 | 33  | 26  | 23  | 15  | 28  | 24  |
| SMMPA09504 | 2  | 1  | 0  | 6   | 4   | 3   | 5   | 3   | 1   |
| SMMPA09505 | 36 | 40 | 32 | 372 | 381 | 275 | 198 | 223 | 208 |
| SMMPA09506 | 15 | 27 | 20 | 82  | 82  | 57  | 47  | 66  | 58  |
| SMMPA09507 | 31 | 32 | 35 | 138 | 121 | 102 | 84  | 104 | 98  |
| SMMPA09508 | 6  | 2  | 4  | 17  | 17  | 21  | 11  | 15  | 8   |
| SMMPA09509 | 23 | 18 | 21 | 197 | 197 | 175 | 111 | 131 | 117 |
| SMMPA09510 | 11 | 11 | 8  | 250 | 226 | 213 | 101 | 140 | 118 |
| SMMPA09511 | 15 | 19 | 6  | 170 | 171 | 121 | 88  | 96  | 97  |
| SMMPA09512 | 8  | 7  | 6  | 101 | 87  | 84  | 32  | 53  | 40  |
| SMMPA09513 | 11 | 6  | 10 | 205 | 162 | 180 | 89  | 108 | 111 |
| SMMPA09514 | 3  | 1  | 6  | 166 | 149 | 139 | 50  | 67  | 57  |
| SMMPA09515 | 16 | 23 | 10 | 38  | 28  | 19  | 26  | 37  | 25  |

|            |    |    |    |     |     |     |     |     |     |
|------------|----|----|----|-----|-----|-----|-----|-----|-----|
| SMMPA09516 | 31 | 27 | 16 | 76  | 56  | 63  | 38  | 65  | 37  |
| SMMPA09517 | 9  | 19 | 19 | 141 | 104 | 101 | 38  | 54  | 37  |
| SMMPA09518 | 24 | 13 | 25 | 158 | 131 | 86  | 54  | 71  | 69  |
| SMMPA09519 | 24 | 26 | 20 | 121 | 86  | 81  | 51  | 44  | 49  |
| SMMPA09520 | 8  | 11 | 13 | 59  | 49  | 45  | 17  | 37  | 25  |
| SMMPA09521 | 15 | 21 | 19 | 150 | 111 | 103 | 87  | 83  | 96  |
| SMMPA09522 | 11 | 12 | 11 | 129 | 141 | 109 | 35  | 33  | 31  |
| SMMPA09523 | 13 | 10 | 7  | 100 | 91  | 93  | 63  | 68  | 54  |
| SMMPA09524 | 18 | 14 | 18 | 121 | 105 | 70  | 52  | 68  | 52  |
| SMMPA09525 | 12 | 11 | 12 | 322 | 311 | 258 | 185 | 237 | 221 |
| SMMPA09526 | 38 | 38 | 36 | 172 | 175 | 137 | 85  | 139 | 125 |
| SMMPA09527 | 49 | 48 | 38 | 275 | 249 | 231 | 123 | 167 | 167 |
| SMMPA09528 | 43 | 43 | 41 | 157 | 157 | 143 | 66  | 99  | 75  |
| SMMPA09529 | 14 | 13 | 10 | 60  | 40  | 33  | 39  | 51  | 50  |
| SMMPA09530 | 38 | 42 | 30 | 39  | 27  | 34  | 59  | 66  | 63  |
| SMMPA09531 | 32 | 30 | 26 | 36  | 30  | 25  | 33  | 58  | 48  |
| SMMPA09532 | 20 | 27 | 35 | 174 | 189 | 165 | 78  | 105 | 98  |
| SMMPA09533 | 21 | 16 | 10 | 60  | 72  | 57  | 32  | 50  | 39  |
| SMMPA09534 | 25 | 44 | 25 | 172 | 135 | 126 | 75  | 100 | 90  |
| SMMPA09535 | 11 | 15 | 8  | 95  | 66  | 61  | 43  | 50  | 52  |
| SMMPA09536 | 29 | 31 | 26 | 407 | 348 | 280 | 188 | 262 | 215 |
| SMMPA09537 | 23 | 23 | 24 | 171 | 157 | 138 | 76  | 103 | 96  |
| SMMPA09538 | 6  | 10 | 13 | 41  | 63  | 50  | 22  | 26  | 24  |
| SMMPA09539 | 3  | 1  | 0  | 19  | 17  | 13  | 7   | 7   | 2   |
| SMMPA09540 | 22 | 37 | 19 | 434 | 434 | 347 | 170 | 192 | 191 |
| SMMPA09541 | 25 | 22 | 26 | 147 | 128 | 107 | 60  | 101 | 88  |
| SMMPA09542 | 25 | 25 | 22 | 237 | 199 | 163 | 96  | 115 | 100 |
| SMMPA09543 | 15 | 16 | 12 | 28  | 24  | 19  | 15  | 30  | 21  |
| SMMPA09544 | 8  | 14 | 12 | 11  | 10  | 7   | 12  | 24  | 26  |
| SMMPA09545 | 5  | 15 | 10 | 15  | 19  | 19  | 20  | 33  | 22  |
| SMMPA09546 | 23 | 31 | 17 | 84  | 66  | 56  | 57  | 56  | 58  |
| SMMPA09547 | 12 | 20 | 15 | 41  | 51  | 39  | 38  | 37  | 46  |
| SMMPA09548 | 14 | 16 | 18 | 21  | 29  | 21  | 22  | 32  | 36  |
| SMMPA09549 | 33 | 22 | 26 | 45  | 52  | 36  | 30  | 55  | 54  |
| SMMPA09550 | 9  | 16 | 11 | 12  | 21  | 17  | 10  | 24  | 14  |
| SMMPA09551 | 20 | 36 | 22 | 51  | 40  | 39  | 28  | 46  | 32  |
| SMMPA09552 | 27 | 30 | 21 | 42  | 43  | 59  | 40  | 51  | 34  |
| SMMPA09553 | 14 | 13 | 8  | 13  | 23  | 17  | 16  | 18  | 27  |
| SMMPA09554 | 16 | 15 | 20 | 409 | 368 | 336 | 174 | 203 | 180 |
| SMMPA09555 | 10 | 8  | 11 | 141 | 146 | 115 | 55  | 74  | 67  |
| SMMPA09556 | 10 | 15 | 19 | 32  | 24  | 27  | 15  | 27  | 19  |

|            |    |    |    |     |     |     |     |     |     |
|------------|----|----|----|-----|-----|-----|-----|-----|-----|
| SMMPA09557 | 18 | 24 | 26 | 261 | 223 | 197 | 140 | 208 | 162 |
| SMMPA09558 | 11 | 8  | 9  | 58  | 63  | 43  | 21  | 18  | 9   |
| SMMPA09559 | 29 | 38 | 29 | 157 | 130 | 99  | 67  | 102 | 76  |
| SMMPA09560 | 11 | 16 | 13 | 106 | 129 | 112 | 61  | 74  | 68  |
| SMMPA09561 | 30 | 23 | 24 | 98  | 70  | 48  | 58  | 63  | 54  |
| SMMPA09562 | 14 | 20 | 15 | 146 | 161 | 157 | 54  | 95  | 57  |
| SMMPA09563 | 17 | 19 | 12 | 25  | 19  | 22  | 16  | 20  | 17  |
| SMMPA09564 | 24 | 18 | 25 | 53  | 40  | 40  | 37  | 61  | 51  |
| SMMPA09565 | 11 | 17 | 12 | 20  | 22  | 15  | 17  | 33  | 20  |
| SMMPA09566 | 14 | 11 | 10 | 161 | 136 | 123 | 65  | 93  | 77  |
| SMMPA09567 | 21 | 13 | 23 | 72  | 61  | 55  | 38  | 40  | 30  |
| SMMPA09568 | 9  | 13 | 6  | 25  | 15  | 18  | 29  | 28  | 30  |
| SMMPA09569 | 10 | 4  | 8  | 10  | 5   | 7   | 8   | 12  | 14  |
| SMMPA09570 | 11 | 17 | 8  | 28  | 25  | 17  | 11  | 22  | 15  |
| SMMPA09571 | 18 | 21 | 14 | 13  | 18  | 13  | 28  | 26  | 20  |
| SMMPA09572 | 29 | 32 | 27 | 170 | 146 | 113 | 71  | 112 | 105 |
| SMMPA09573 | 16 | 15 | 28 | 68  | 50  | 52  | 34  | 45  | 47  |
| SMMPA09574 | 45 | 43 | 29 | 172 | 176 | 123 | 64  | 89  | 84  |
| SMMPA09575 | 9  | 10 | 12 | 17  | 14  | 21  | 33  | 22  | 37  |
| SMMPA09576 | 22 | 25 | 19 | 86  | 85  | 69  | 44  | 59  | 52  |
| SMMPA09577 | 14 | 20 | 8  | 55  | 35  | 37  | 23  | 27  | 29  |
| SMMPA09578 | 39 | 42 | 28 | 189 | 171 | 145 | 77  | 110 | 107 |
| SMMPA09579 | 24 | 15 | 14 | 60  | 55  | 41  | 26  | 34  | 27  |
| SMMPA09580 | 19 | 15 | 15 | 35  | 38  | 36  | 16  | 18  | 26  |
| SMMPA09581 | 14 | 12 | 14 | 220 | 205 | 148 | 91  | 133 | 120 |
| SMMPA09582 | 42 | 47 | 35 | 33  | 30  | 40  | 36  | 42  | 51  |
| SMMPA09583 | 15 | 20 | 19 | 26  | 26  | 20  | 23  | 39  | 32  |
| SMMPA09584 | 24 | 16 | 13 | 38  | 28  | 31  | 17  | 19  | 21  |
| SMMPA09585 | 22 | 21 | 20 | 30  | 24  | 22  | 12  | 31  | 24  |
| SMMPA09586 | 17 | 23 | 24 | 23  | 16  | 18  | 29  | 27  | 28  |
| SMMPA09587 | 16 | 16 | 13 | 16  | 22  | 26  | 10  | 16  | 23  |
| SMMPA09588 | 16 | 17 | 12 | 42  | 37  | 34  | 40  | 40  | 35  |
| SMMPA09589 | 32 | 32 | 35 | 30  | 29  | 25  | 28  | 49  | 39  |
| SMMPA09590 | 20 | 18 | 18 | 30  | 32  | 27  | 41  | 47  | 34  |
| SMMPA09591 | 13 | 19 | 16 | 56  | 44  | 50  | 36  | 51  | 50  |
| SMMPA09592 | 14 | 12 | 12 | 20  | 18  | 18  | 15  | 25  | 18  |
| SMMPA09593 | 46 | 48 | 29 | 89  | 80  | 63  | 51  | 65  | 83  |
| SMMPA09594 | 41 | 30 | 40 | 60  | 45  | 37  | 48  | 49  | 47  |
| SMMPA09595 | 19 | 22 | 19 | 48  | 36  | 45  | 42  | 56  | 37  |
| SMMPA09596 | 22 | 22 | 19 | 39  | 31  | 28  | 22  | 23  | 27  |
| SMMPA09597 | 17 | 17 | 16 | 20  | 17  | 16  | 23  | 39  | 38  |

|            |    |    |    |     |     |     |     |     |     |
|------------|----|----|----|-----|-----|-----|-----|-----|-----|
| SMMPA09598 | 2  | 7  | 3  | 3   | 4   | 4   | 11  | 5   | 7   |
| SMMPA09599 | 5  | 8  | 6  | 9   | 9   | 12  | 9   | 5   | 11  |
| SMMPA09600 | 8  | 12 | 5  | 7   | 7   | 7   | 5   | 6   | 7   |
| SMMPA09601 | 25 | 13 | 11 | 57  | 30  | 34  | 27  | 32  | 37  |
| SMMPA09602 | 16 | 9  | 15 | 99  | 79  | 42  | 47  | 60  | 53  |
| SMMPA09603 | 18 | 26 | 24 | 432 | 380 | 286 | 203 | 264 | 211 |
| SMMPA09604 | 18 | 14 | 16 | 239 | 235 | 198 | 107 | 130 | 109 |
| SMMPA09605 | 19 | 16 | 14 | 482 | 444 | 353 | 276 | 362 | 312 |
| SMMPA09606 | 8  | 5  | 9  | 60  | 57  | 57  | 15  | 22  | 19  |
| SMMPA09607 | 59 | 60 | 57 | 254 | 187 | 182 | 128 | 162 | 187 |
| SMMPA09608 | 13 | 15 | 18 | 357 | 345 | 298 | 122 | 162 | 142 |
| SMMPA09609 | 70 | 79 | 67 | 366 | 317 | 226 | 193 | 267 | 238 |
| SMMPA09610 | 38 | 45 | 44 | 77  | 70  | 58  | 58  | 74  | 66  |
| SMMPA09611 | 11 | 6  | 14 | 37  | 37  | 28  | 20  | 18  | 31  |
| SMMPA09612 | 11 | 17 | 20 | 65  | 50  | 45  | 25  | 50  | 32  |
| SMMPA09613 | 23 | 22 | 20 | 178 | 124 | 113 | 94  | 100 | 82  |
| SMMPA09614 | 18 | 23 | 14 | 84  | 72  | 67  | 45  | 58  | 62  |
| SMMPA09615 | 16 | 9  | 11 | 72  | 78  | 51  | 45  | 40  | 63  |
| SMMPA09616 | 17 | 21 | 28 | 77  | 62  | 57  | 59  | 61  | 65  |
| SMMPA09617 | 20 | 22 | 13 | 70  | 73  | 54  | 48  | 52  | 45  |
| SMMPA09618 | 15 | 17 | 15 | 84  | 67  | 57  | 19  | 34  | 37  |
| SMMPA09619 | 9  | 12 | 10 | 34  | 46  | 40  | 28  | 31  | 34  |
| SMMPA09620 | 23 | 15 | 5  | 40  | 23  | 33  | 28  | 25  | 24  |
| SMMPA09621 | 22 | 24 | 25 | 82  | 58  | 39  | 47  | 63  | 57  |
| SMMPA09622 | 12 | 13 | 18 | 67  | 52  | 39  | 41  | 54  | 52  |
| SMMPA09623 | 11 | 16 | 16 | 129 | 133 | 110 | 65  | 68  | 91  |
| SMMPA09624 | 37 | 36 | 30 | 48  | 29  | 41  | 49  | 65  | 68  |
| SMMPA09625 | 7  | 7  | 7  | 13  | 11  | 18  | 11  | 15  | 13  |
| SMMPA09626 | 10 | 10 | 8  | 32  | 27  | 21  | 22  | 18  | 18  |
| SMMPA09627 | 38 | 28 | 30 | 123 | 140 | 88  | 66  | 78  | 75  |
| SMMPA09628 | 14 | 17 | 15 | 42  | 47  | 31  | 27  | 33  | 29  |
| SMMPA09629 | 29 | 29 | 18 | 49  | 34  | 49  | 42  | 40  | 43  |
| SMMPA09630 | 16 | 11 | 6  | 21  | 25  | 12  | 20  | 27  | 20  |
| SMMPA09631 | 19 | 13 | 13 | 32  | 15  | 15  | 15  | 28  | 31  |
| SMMPA09632 | 22 | 17 | 16 | 64  | 58  | 43  | 32  | 41  | 48  |
| SMMPA09633 | 1  | 3  | 1  | 0   | 3   | 1   | 5   | 7   | 7   |
| SMMPA09634 | 12 | 15 | 20 | 30  | 11  | 15  | 18  | 35  | 26  |
| SMMPA09635 | 21 | 12 | 6  | 20  | 23  | 24  | 32  | 31  | 24  |
| SMMPA09636 | 13 | 9  | 4  | 13  | 18  | 4   | 18  | 22  | 24  |
| SMMPA09637 | 24 | 12 | 11 | 24  | 36  | 31  | 17  | 37  | 23  |
| SMMPA09638 | 23 | 25 | 21 | 88  | 87  | 74  | 51  | 59  | 53  |

|            |    |    |    |     |     |     |     |     |     |
|------------|----|----|----|-----|-----|-----|-----|-----|-----|
| SMMPA09639 | 24 | 28 | 23 | 112 | 123 | 78  | 53  | 69  | 69  |
| SMMPA09640 | 26 | 29 | 16 | 22  | 19  | 20  | 20  | 36  | 36  |
| SMMPA09641 | 8  | 21 | 14 | 25  | 19  | 20  | 33  | 27  | 36  |
| SMMPA09642 | 24 | 20 | 20 | 34  | 22  | 33  | 23  | 40  | 48  |
| SMMPA09643 | 17 | 12 | 13 | 18  | 24  | 12  | 23  | 31  | 27  |
| SMMPA09644 | 21 | 15 | 19 | 13  | 18  | 17  | 22  | 26  | 27  |
| SMMPA09645 | 23 | 32 | 20 | 27  | 26  | 29  | 29  | 44  | 37  |
| SMMPA09646 | 18 | 18 | 18 | 128 | 108 | 98  | 89  | 91  | 95  |
| SMMPA09647 | 32 | 20 | 31 | 34  | 22  | 29  | 21  | 34  | 41  |
| SMMPA09648 | 12 | 16 | 15 | 149 | 138 | 120 | 88  | 98  | 82  |
| SMMPA09649 | 5  | 5  | 2  | 61  | 49  | 40  | 25  | 36  | 31  |
| SMMPA09650 | 1  | 4  | 3  | 59  | 45  | 47  | 33  | 24  | 33  |
| SMMPA09651 | 17 | 20 | 16 | 602 | 573 | 439 | 297 | 404 | 340 |
| SMMPA09652 | 10 | 6  | 13 | 380 | 376 | 334 | 224 | 298 | 273 |
| SMMPA09653 | 20 | 24 | 21 | 303 | 290 | 206 | 141 | 185 | 185 |
| SMMPA09654 | 8  | 9  | 16 | 318 | 315 | 246 | 148 | 192 | 151 |
| SMMPA09655 | 31 | 40 | 20 | 565 | 521 | 381 | 238 | 291 | 312 |
| SMMPA09656 | 20 | 26 | 20 | 440 | 393 | 359 | 191 | 270 | 236 |
| SMMPA09657 | 7  | 11 | 7  | 214 | 198 | 159 | 77  | 100 | 92  |
| SMMPA09658 | 35 | 34 | 34 | 607 | 517 | 392 | 235 | 358 | 299 |
| SMMPA09659 | 13 | 9  | 14 | 311 | 284 | 223 | 101 | 126 | 88  |
| SMMPA09660 | 18 | 23 | 21 | 301 | 260 | 225 | 116 | 153 | 155 |
| SMMPA09661 | 17 | 17 | 17 | 184 | 185 | 133 | 111 | 124 | 117 |
| SMMPA09662 | 21 | 20 | 23 | 200 | 200 | 173 | 92  | 88  | 66  |
| SMMPA09663 | 10 | 13 | 8  | 32  | 10  | 17  | 12  | 13  | 13  |
| SMMPA09664 | 12 | 17 | 17 | 22  | 30  | 18  | 25  | 23  | 33  |
| SMMPA09665 | 35 | 31 | 26 | 149 | 152 | 103 | 75  | 100 | 107 |
| SMMPA09666 | 23 | 22 | 36 | 89  | 75  | 68  | 54  | 70  | 62  |
| SMMPA09667 | 5  | 4  | 3  | 74  | 65  | 42  | 24  | 31  | 32  |
| SMMPA09668 | 8  | 11 | 10 | 20  | 26  | 15  | 18  | 15  | 19  |
| SMMPA09669 | 16 | 20 | 23 | 155 | 145 | 120 | 72  | 90  | 76  |
| SMMPA09670 | 19 | 14 | 10 | 86  | 82  | 56  | 43  | 60  | 34  |
| SMMPA09671 | 12 | 17 | 10 | 208 | 186 | 127 | 59  | 90  | 98  |
| SMMPA09672 | 14 | 9  | 9  | 280 | 251 | 225 | 169 | 216 | 199 |
| SMMPA09673 | 10 | 10 | 10 | 160 | 182 | 132 | 108 | 150 | 127 |
| SMMPA09674 | 44 | 39 | 30 | 527 | 479 | 412 | 324 | 392 | 344 |
| SMMPA09675 | 31 | 21 | 20 | 345 | 301 | 244 | 175 | 219 | 196 |
| SMMPA09676 | 12 | 18 | 21 | 699 | 658 | 582 | 387 | 475 | 453 |
| SMMPA09677 | 21 | 23 | 21 | 798 | 718 | 683 | 366 | 498 | 450 |
| SMMPA09678 | 13 | 9  | 9  | 436 | 358 | 360 | 239 | 303 | 257 |
| SMMPA09679 | 13 | 20 | 15 | 255 | 246 | 183 | 132 | 177 | 183 |

|            |    |    |    |     |     |     |     |     |     |
|------------|----|----|----|-----|-----|-----|-----|-----|-----|
| SMMPA09680 | 31 | 23 | 16 | 392 | 348 | 251 | 154 | 222 | 209 |
| SMMPA09681 | 40 | 31 | 26 | 23  | 28  | 25  | 24  | 56  | 41  |
| SMMPA09682 | 29 | 29 | 20 | 105 | 96  | 85  | 68  | 68  | 70  |
| SMMPA09683 | 12 | 5  | 13 | 61  | 50  | 43  | 20  | 28  | 28  |
| SMMPA09684 | 23 | 23 | 31 | 155 | 177 | 117 | 86  | 87  | 86  |
| SMMPA09685 | 6  | 9  | 6  | 56  | 45  | 51  | 18  | 24  | 21  |
| SMMPA09686 | 56 | 53 | 40 | 54  | 38  | 37  | 30  | 46  | 38  |
| SMMPA09687 | 12 | 18 | 14 | 54  | 78  | 59  | 28  | 42  | 30  |
| SMMPA09688 | 22 | 15 | 15 | 16  | 10  | 16  | 13  | 17  | 14  |
| SMMPA09689 | 31 | 32 | 27 | 214 | 218 | 144 | 75  | 106 | 98  |
| SMMPA09690 | 10 | 11 | 11 | 164 | 135 | 132 | 44  | 60  | 60  |
| SMMPA09691 | 7  | 11 | 6  | 9   | 10  | 16  | 5   | 6   | 16  |
| SMMPA09692 | 14 | 17 | 9  | 41  | 35  | 26  | 25  | 32  | 29  |
| SMMPA09693 | 22 | 24 | 37 | 177 | 182 | 111 | 84  | 91  | 89  |
| SMMPA09694 | 16 | 15 | 12 | 165 | 162 | 110 | 107 | 158 | 153 |
| SMMPA09695 | 25 | 28 | 25 | 61  | 56  | 51  | 24  | 40  | 33  |
| SMMPA09696 | 19 | 8  | 10 | 51  | 46  | 33  | 23  | 28  | 31  |
| SMMPA09697 | 16 | 8  | 7  | 35  | 27  | 18  | 8   | 29  | 29  |
| SMMPA09698 | 12 | 17 | 13 | 114 | 93  | 66  | 43  | 64  | 44  |
| SMMPA09699 | 20 | 19 | 30 | 125 | 127 | 78  | 74  | 105 | 97  |
| SMMPA09700 | 18 | 21 | 18 | 53  | 37  | 32  | 21  | 37  | 34  |
| SMMPA09701 | 16 | 11 | 22 | 82  | 91  | 83  | 54  | 72  | 61  |
| SMMPA09702 | 25 | 19 | 16 | 87  | 81  | 64  | 46  | 77  | 67  |
| SMMPA09703 | 15 | 16 | 14 | 68  | 69  | 57  | 30  | 46  | 31  |
| SMMPA09704 | 25 | 22 | 16 | 162 | 182 | 149 | 102 | 142 | 129 |
| SMMPA09705 | 30 | 30 | 29 | 140 | 121 | 98  | 94  | 106 | 97  |
| SMMPA09706 | 11 | 12 | 13 | 110 | 99  | 88  | 61  | 76  | 58  |
| SMMPA09707 | 14 | 24 | 26 | 383 | 320 | 259 | 66  | 99  | 101 |
| SMMPA09708 | 9  | 5  | 8  | 103 | 121 | 98  | 42  | 61  | 55  |
| SMMPA09709 | 21 | 26 | 17 | 272 | 242 | 213 | 89  | 117 | 92  |
| SMMPA09710 | 11 | 27 | 18 | 107 | 96  | 78  | 40  | 57  | 48  |
| SMMPA09711 | 8  | 8  | 8  | 140 | 108 | 83  | 34  | 33  | 58  |
| SMMPA09712 | 8  | 25 | 17 | 115 | 82  | 77  | 59  | 82  | 60  |
| SMMPA09713 | 20 | 18 | 16 | 66  | 65  | 36  | 28  | 33  | 40  |
| SMMPA09714 | 19 | 27 | 14 | 86  | 85  | 62  | 38  | 57  | 47  |
| SMMPA09715 | 12 | 11 | 14 | 65  | 64  | 40  | 28  | 33  | 33  |
| SMMPA09716 | 17 | 11 | 9  | 49  | 49  | 42  | 33  | 50  | 56  |
| SMMPA09717 | 18 | 18 | 19 | 75  | 68  | 51  | 53  | 74  | 43  |
| SMMPA09718 | 25 | 26 | 23 | 167 | 169 | 106 | 58  | 77  | 65  |
| SMMPA09719 | 24 | 19 | 23 | 61  | 72  | 56  | 38  | 44  | 60  |
| SMMPA09720 | 62 | 45 | 46 | 85  | 65  | 61  | 70  | 79  | 77  |

|            |    |    |    |     |     |     |     |     |     |
|------------|----|----|----|-----|-----|-----|-----|-----|-----|
| SMMPA09721 | 28 | 36 | 11 | 201 | 184 | 149 | 69  | 88  | 86  |
| SMMPA09722 | 7  | 18 | 20 | 69  | 76  | 54  | 23  | 37  | 36  |
| SMMPA09723 | 36 | 16 | 23 | 89  | 86  | 79  | 45  | 89  | 70  |
| SMMPA09724 | 19 | 39 | 33 | 185 | 173 | 146 | 67  | 95  | 87  |
| SMMPA09725 | 16 | 10 | 5  | 53  | 37  | 35  | 23  | 49  | 31  |
| SMMPA09726 | 41 | 27 | 28 | 56  | 55  | 39  | 48  | 83  | 76  |
| SMMPA09727 | 14 | 15 | 12 | 35  | 27  | 20  | 23  | 29  | 23  |
| SMMPA09728 | 6  | 5  | 7  | 21  | 18  | 19  | 18  | 24  | 15  |
| SMMPA09729 | 18 | 17 | 6  | 42  | 29  | 31  | 42  | 52  | 26  |
| SMMPA09730 | 12 | 13 | 12 | 19  | 16  | 20  | 13  | 18  | 19  |
| SMMPA09731 | 10 | 19 | 11 | 49  | 44  | 34  | 22  | 45  | 35  |
| SMMPA09732 | 21 | 26 | 19 | 59  | 53  | 65  | 45  | 51  | 51  |
| SMMPA09733 | 13 | 18 | 15 | 33  | 29  | 32  | 25  | 34  | 37  |
| SMMPA09734 | 18 | 26 | 28 | 37  | 29  | 33  | 36  | 41  | 49  |
| SMMPA09735 | 13 | 19 | 12 | 81  | 78  | 70  | 60  | 74  | 94  |
| SMMPA09736 | 21 | 22 | 23 | 231 | 188 | 150 | 103 | 119 | 124 |
| SMMPA09737 | 14 | 16 | 12 | 62  | 52  | 49  | 41  | 51  | 42  |
| SMMPA09738 | 26 | 21 | 22 | 241 | 188 | 163 | 119 | 146 | 117 |
| SMMPA09739 | 16 | 12 | 11 | 177 | 129 | 100 | 93  | 87  | 90  |
| SMMPA09740 | 30 | 33 | 39 | 552 | 412 | 394 | 212 | 310 | 281 |
| SMMPA09741 | 24 | 13 | 23 | 140 | 155 | 121 | 56  | 75  | 72  |
| SMMPA09742 | 26 | 22 | 20 | 29  | 26  | 16  | 26  | 20  | 31  |
| SMMPA09743 | 50 | 62 | 49 | 41  | 58  | 45  | 62  | 76  | 51  |
| SMMPA09744 | 29 | 20 | 19 | 55  | 45  | 30  | 31  | 39  | 40  |
| SMMPA09745 | 45 | 34 | 29 | 191 | 195 | 143 | 84  | 126 | 122 |
| SMMPA09746 | 26 | 24 | 24 | 110 | 131 | 76  | 53  | 70  | 74  |
| SMMPA09747 | 26 | 32 | 21 | 83  | 73  | 62  | 32  | 45  | 50  |
| SMMPA09748 | 8  | 21 | 15 | 52  | 43  | 49  | 33  | 64  | 49  |
| SMMPA09749 | 15 | 28 | 19 | 39  | 34  | 26  | 36  | 60  | 37  |
| SMMPA09750 | 32 | 36 | 26 | 60  | 54  | 55  | 41  | 44  | 60  |
| SMMPA09751 | 23 | 20 | 13 | 28  | 22  | 22  | 18  | 28  | 32  |
| SMMPA09752 | 8  | 13 | 12 | 29  | 23  | 14  | 12  | 18  | 21  |
| SMMPA09753 | 15 | 19 | 26 | 106 | 100 | 86  | 78  | 102 | 90  |
| SMMPA09754 | 17 | 14 | 17 | 81  | 62  | 57  | 57  | 74  | 80  |
| SMMPA09755 | 15 | 18 | 17 | 43  | 41  | 37  | 41  | 29  | 36  |
| SMMPA09756 | 31 | 25 | 27 | 54  | 28  | 23  | 23  | 35  | 30  |
| SMMPA09757 | 17 | 11 | 12 | 43  | 42  | 34  | 23  | 28  | 40  |
| SMMPA09758 | 18 | 21 | 14 | 31  | 37  | 29  | 18  | 26  | 38  |
| SMMPA09759 | 7  | 11 | 1  | 14  | 17  | 11  | 5   | 22  | 14  |
| SMMPA09760 | 22 | 23 | 28 | 279 | 233 | 183 | 107 | 173 | 128 |
| SMMPA09761 | 29 | 36 | 32 | 427 | 381 | 337 | 205 | 259 | 233 |

|            |    |    |    |     |     |     |     |     |     |
|------------|----|----|----|-----|-----|-----|-----|-----|-----|
| SMMPA09762 | 22 | 22 | 17 | 70  | 64  | 54  | 47  | 56  | 54  |
| SMMPA09763 | 14 | 19 | 23 | 66  | 74  | 54  | 31  | 48  | 33  |
| SMMPA09764 | 16 | 23 | 26 | 170 | 135 | 105 | 52  | 61  | 51  |
| SMMPA09765 | 21 | 14 | 12 | 53  | 58  | 36  | 38  | 46  | 44  |
| SMMPA09766 | 31 | 34 | 37 | 78  | 53  | 41  | 37  | 52  | 70  |
| SMMPA09767 | 20 | 26 | 21 | 114 | 133 | 84  | 60  | 98  | 64  |
| SMMPA09768 | 29 | 39 | 28 | 182 | 199 | 142 | 85  | 139 | 103 |
| SMMPA09769 | 13 | 14 | 17 | 61  | 53  | 36  | 44  | 52  | 46  |
| SMMPA09770 | 27 | 29 | 21 | 74  | 47  | 55  | 54  | 61  | 57  |
| SMMPA09771 | 4  | 3  | 3  | 11  | 6   | 7   | 13  | 6   | 13  |
| SMMPA09772 | 16 | 9  | 19 | 35  | 24  | 26  | 13  | 19  | 29  |
| SMMPA09773 | 2  | 12 | 15 | 24  | 35  | 17  | 18  | 21  | 34  |
| SMMPA09774 | 29 | 29 | 30 | 98  | 94  | 77  | 43  | 56  | 37  |
| SMMPA09775 | 2  | 0  | 0  | 4   | 3   | 6   | 9   | 5   | 3   |
| SMMPA09776 | 20 | 20 | 14 | 35  | 40  | 29  | 32  | 40  | 36  |
| SMMPA09777 | 4  | 7  | 5  | 17  | 18  | 21  | 15  | 29  | 26  |
| SMMPA09778 | 30 | 13 | 16 | 27  | 25  | 29  | 22  | 15  | 18  |
| SMMPA09779 | 31 | 24 | 24 | 62  | 50  | 58  | 32  | 44  | 39  |
| SMMPA09780 | 11 | 20 | 14 | 26  | 27  | 22  | 15  | 20  | 16  |
| SMMPA09781 | 11 | 10 | 7  | 93  | 105 | 62  | 36  | 70  | 65  |
| SMMPA09782 | 25 | 16 | 14 | 257 | 263 | 201 | 228 | 266 | 233 |
| SMMPA09783 | 5  | 11 | 13 | 95  | 81  | 64  | 38  | 51  | 41  |
| SMMPA09784 | 17 | 23 | 14 | 50  | 72  | 50  | 46  | 44  | 58  |
| SMMPA09785 | 16 | 19 | 7  | 53  | 50  | 40  | 49  | 55  | 45  |
| SMMPA09786 | 23 | 31 | 18 | 177 | 158 | 129 | 81  | 106 | 96  |
| SMMPA09787 | 21 | 31 | 29 | 220 | 189 | 155 | 89  | 110 | 93  |
| SMMPA09788 | 18 | 13 | 18 | 158 | 142 | 127 | 65  | 97  | 82  |
| SMMPA09789 | 16 | 21 | 15 | 101 | 86  | 51  | 30  | 48  | 51  |
| SMMPA09790 | 12 | 13 | 4  | 93  | 76  | 85  | 19  | 38  | 34  |
| SMMPA09791 | 10 | 11 | 7  | 39  | 36  | 32  | 19  | 24  | 19  |
| SMMPA09792 | 18 | 17 | 7  | 24  | 30  | 21  | 22  | 21  | 21  |
| SMMPA09793 | 3  | 8  | 6  | 109 | 116 | 113 | 34  | 56  | 52  |
| SMMPA09794 | 25 | 11 | 9  | 302 | 267 | 244 | 114 | 156 | 132 |
| SMMPA09795 | 5  | 6  | 4  | 25  | 25  | 32  | 14  | 17  | 13  |
| SMMPA09796 | 10 | 13 | 11 | 221 | 213 | 186 | 66  | 104 | 104 |
| SMMPA09797 | 1  | 5  | 3  | 35  | 28  | 35  | 17  | 18  | 10  |
| SMMPA09798 | 2  | 3  | 1  | 21  | 27  | 26  | 12  | 15  | 12  |
| SMMPA09799 | 6  | 8  | 10 | 106 | 84  | 70  | 44  | 49  | 44  |
| SMMPA09800 | 9  | 7  | 12 | 119 | 100 | 71  | 65  | 68  | 48  |
| SMMPA09801 | 5  | 3  | 8  | 38  | 34  | 33  | 11  | 5   | 11  |
| SMMPA09802 | 17 | 12 | 8  | 33  | 14  | 29  | 22  | 20  | 21  |



|            |    |    |    |     |     |     |     |     |     |
|------------|----|----|----|-----|-----|-----|-----|-----|-----|
| SMMPA09803 | 20 | 23 | 16 | 34  | 32  | 18  | 26  | 27  | 36  |
| SMMPA09804 | 28 | 26 | 18 | 170 | 140 | 122 | 71  | 100 | 73  |
| SMMPA09805 | 24 | 43 | 33 | 303 | 259 | 186 | 122 | 171 | 171 |
| SMMPA09806 | 11 | 20 | 20 | 122 | 95  | 80  | 53  | 82  | 58  |
| SMMPA09807 | 7  | 4  | 4  | 3   | 9   | 5   | 6   | 13  | 14  |
| SMMPA09808 | 23 | 30 | 23 | 61  | 75  | 60  | 38  | 46  | 47  |
| SMMPA09809 | 13 | 15 | 12 | 32  | 32  | 17  | 20  | 30  | 35  |
| SMMPA09810 | 31 | 41 | 33 | 72  | 72  | 62  | 51  | 52  | 51  |
| SMMPA09811 | 4  | 4  | 4  | 19  | 19  | 14  | 4   | 7   | 5   |
| SMMPA09812 | 17 | 23 | 20 | 32  | 34  | 24  | 37  | 42  | 38  |
| SMMPA09813 | 15 | 23 | 19 | 116 | 78  | 83  | 43  | 85  | 55  |
| SMMPA09814 | 7  | 6  | 3  | 11  | 9   | 11  | 8   | 11  | 6   |
| SMMPA09815 | 15 | 15 | 14 | 31  | 29  | 26  | 30  | 32  | 33  |
| SMMPA09816 | 19 | 10 | 17 | 22  | 21  | 14  | 29  | 26  | 28  |
| SMMPA09817 | 13 | 15 | 14 | 28  | 22  | 20  | 19  | 21  | 19  |
| SMMPA09818 | 10 | 12 | 15 | 15  | 21  | 14  | 13  | 26  | 14  |
| SMMPA09819 | 17 | 17 | 18 | 33  | 30  | 30  | 20  | 52  | 30  |
| SMMPA09820 | 22 | 17 | 24 | 27  | 38  | 39  | 21  | 38  | 27  |
| SMMPA09821 | 16 | 26 | 13 | 25  | 41  | 25  | 23  | 21  | 32  |
| SMMPA09822 | 14 | 21 | 8  | 40  | 39  | 24  | 14  | 46  | 25  |
| SMMPA09823 | 25 | 27 | 28 | 156 | 148 | 93  | 51  | 76  | 60  |
| SMMPA09824 | 24 | 26 | 30 | 98  | 81  | 72  | 45  | 67  | 65  |
| SMMPA09825 | 18 | 18 | 16 | 268 | 258 | 209 | 86  | 129 | 120 |
| SMMPA09826 | 11 | 8  | 6  | 34  | 41  | 29  | 27  | 21  | 21  |
| SMMPA09827 | 13 | 25 | 12 | 47  | 36  | 35  | 25  | 28  | 31  |
| SMMPA09828 | 24 | 26 | 26 | 224 | 206 | 170 | 81  | 120 | 111 |
| SMMPA09829 | 29 | 30 | 25 | 86  | 74  | 69  | 31  | 57  | 60  |
| SMMPA09830 | 18 | 25 | 21 | 92  | 99  | 65  | 47  | 66  | 78  |
| SMMPA09831 | 9  | 20 | 13 | 291 | 238 | 205 | 128 | 173 | 155 |
| SMMPA09832 | 21 | 30 | 23 | 95  | 81  | 66  | 58  | 76  | 80  |
| SMMPA09833 | 32 | 21 | 17 | 168 | 167 | 130 | 78  | 83  | 95  |
| SMMPA09834 | 17 | 17 | 15 | 59  | 48  | 47  | 32  | 49  | 39  |
| SMMPA09835 | 14 | 6  | 5  | 88  | 84  | 68  | 37  | 40  | 37  |
| SMMPA09836 | 20 | 18 | 16 | 52  | 54  | 50  | 26  | 40  | 35  |
| SMMPA09837 | 33 | 26 | 24 | 226 | 198 | 167 | 87  | 153 | 97  |
| SMMPA09838 | 7  | 16 | 12 | 27  | 23  | 14  | 15  | 26  | 27  |
| SMMPA09839 | 27 | 27 | 26 | 234 | 215 | 167 | 115 | 161 | 142 |
| SMMPA09840 | 21 | 26 | 15 | 287 | 267 | 209 | 127 | 162 | 136 |
| SMMPA09841 | 13 | 16 | 13 | 74  | 70  | 63  | 42  | 60  | 52  |
| SMMPA09842 | 18 | 18 | 8  | 152 | 138 | 114 | 59  | 75  | 64  |
| SMMPA09843 | 33 | 41 | 42 | 602 | 574 | 453 | 203 | 252 | 252 |

|            |    |    |    |     |     |     |     |     |     |
|------------|----|----|----|-----|-----|-----|-----|-----|-----|
| SMMPA09844 | 10 | 8  | 8  | 23  | 16  | 14  | 17  | 17  | 15  |
| SMMPA09845 | 18 | 24 | 12 | 114 | 92  | 78  | 65  | 63  | 72  |
| SMMPA09846 | 25 | 26 | 27 | 57  | 53  | 51  | 43  | 50  | 46  |
| SMMPA09847 | 19 | 18 | 23 | 70  | 48  | 39  | 38  | 66  | 49  |
| SMMPA09848 | 26 | 26 | 11 | 89  | 70  | 60  | 55  | 89  | 68  |
| SMMPA09849 | 14 | 7  | 11 | 60  | 67  | 52  | 31  | 36  | 30  |
| SMMPA09850 | 4  | 12 | 8  | 14  | 14  | 14  | 22  | 16  | 14  |
| SMMPA09851 | 22 | 24 | 18 | 399 | 382 | 286 | 144 | 220 | 160 |
| SMMPA09852 | 14 | 13 | 12 | 96  | 105 | 87  | 36  | 56  | 39  |
| SMMPA09853 | 6  | 5  | 6  | 9   | 15  | 6   | 8   | 20  | 6   |
| SMMPA09854 | 15 | 17 | 15 | 127 | 128 | 110 | 36  | 70  | 70  |
| SMMPA09855 | 17 | 19 | 29 | 82  | 52  | 61  | 28  | 36  | 38  |
| SMMPA09856 | 13 | 16 | 5  | 72  | 64  | 54  | 20  | 38  | 25  |
| SMMPA09857 | 12 | 18 | 15 | 45  | 40  | 43  | 21  | 39  | 15  |
| SMMPA09858 | 23 | 27 | 25 | 25  | 18  | 25  | 23  | 34  | 53  |
| SMMPA09859 | 9  | 16 | 9  | 31  | 31  | 26  | 17  | 23  | 21  |
| SMMPA09860 | 10 | 13 | 18 | 23  | 30  | 26  | 20  | 20  | 24  |
| SMMPA09861 | 16 | 17 | 15 | 28  | 23  | 13  | 25  | 29  | 27  |
| SMMPA09862 | 23 | 21 | 13 | 13  | 16  | 23  | 29  | 36  | 45  |
| SMMPA09863 | 4  | 8  | 9  | 14  | 13  | 10  | 12  | 8   | 6   |
| SMMPA09864 | 12 | 24 | 17 | 42  | 43  | 43  | 27  | 36  | 34  |
| SMMPA09865 | 24 | 22 | 8  | 39  | 38  | 28  | 32  | 52  | 35  |
| SMMPA09866 | 16 | 20 | 17 | 65  | 76  | 58  | 58  | 51  | 58  |
| SMMPA09867 | 7  | 10 | 9  | 22  | 19  | 18  | 13  | 19  | 9   |
| SMMPA09868 | 17 | 14 | 13 | 63  | 56  | 66  | 31  | 43  | 36  |
| SMMPA09869 | 30 | 34 | 31 | 260 | 271 | 214 | 94  | 140 | 155 |
| SMMPA09870 | 53 | 54 | 32 | 117 | 152 | 109 | 91  | 86  | 122 |
| SMMPA09871 | 38 | 29 | 31 | 70  | 40  | 37  | 46  | 81  | 51  |
| SMMPA09872 | 10 | 20 | 26 | 70  | 53  | 49  | 39  | 46  | 40  |
| SMMPA09873 | 16 | 16 | 16 | 61  | 55  | 35  | 20  | 46  | 49  |
| SMMPA09874 | 30 | 30 | 35 | 141 | 122 | 90  | 65  | 67  | 82  |
| SMMPA09875 | 20 | 15 | 19 | 104 | 99  | 89  | 54  | 55  | 70  |
| SMMPA09876 | 17 | 29 | 29 | 90  | 74  | 58  | 52  | 61  | 77  |
| SMMPA09877 | 40 | 41 | 36 | 70  | 76  | 66  | 59  | 88  | 77  |
| SMMPA09878 | 25 | 22 | 20 | 54  | 43  | 37  | 31  | 38  | 50  |
| SMMPA09879 | 21 | 24 | 29 | 117 | 147 | 70  | 63  | 87  | 84  |
| SMMPA09880 | 24 | 22 | 22 | 62  | 68  | 38  | 44  | 46  | 59  |
| SMMPA09881 | 22 | 20 | 16 | 90  | 78  | 61  | 30  | 56  | 36  |
| SMMPA09882 | 14 | 17 | 14 | 259 | 292 | 213 | 105 | 123 | 121 |
| SMMPA09883 | 6  | 10 | 6  | 32  | 34  | 25  | 7   | 23  | 12  |
| SMMPA09884 | 22 | 31 | 35 | 145 | 130 | 117 | 51  | 86  | 78  |

|            |    |    |    |     |     |     |     |     |     |
|------------|----|----|----|-----|-----|-----|-----|-----|-----|
| SMMPA09885 | 17 | 8  | 10 | 76  | 70  | 55  | 31  | 62  | 30  |
| SMMPA09886 | 22 | 23 | 27 | 171 | 188 | 131 | 62  | 75  | 85  |
| SMMPA09887 | 25 | 31 | 19 | 115 | 91  | 79  | 65  | 90  | 107 |
| SMMPA09888 | 17 | 23 | 18 | 125 | 84  | 82  | 44  | 65  | 76  |
| SMMPA09889 | 24 | 22 | 38 | 200 | 182 | 143 | 111 | 164 | 135 |
| SMMPA09890 | 15 | 16 | 19 | 130 | 120 | 93  | 56  | 87  | 87  |
| SMMPA09891 | 9  | 12 | 15 | 74  | 63  | 50  | 30  | 42  | 34  |
| SMMPA09892 | 6  | 6  | 9  | 41  | 44  | 38  | 22  | 29  | 25  |
| SMMPA09893 | 4  | 8  | 9  | 14  | 21  | 14  | 14  | 9   | 17  |
| SMMPA09894 | 21 | 32 | 26 | 53  | 43  | 44  | 30  | 35  | 35  |
| SMMPA09895 | 17 | 18 | 17 | 52  | 55  | 44  | 30  | 40  | 35  |
| SMMPA09896 | 16 | 15 | 16 | 41  | 33  | 21  | 37  | 29  | 26  |
| SMMPA09897 | 10 | 14 | 13 | 42  | 43  | 33  | 44  | 29  | 34  |
| SMMPA09898 | 5  | 4  | 8  | 28  | 29  | 13  | 19  | 19  | 15  |
| SMMPA09899 | 18 | 17 | 18 | 43  | 46  | 48  | 43  | 46  | 47  |
| SMMPA09900 | 7  | 12 | 13 | 22  | 21  | 18  | 23  | 34  | 37  |
| SMMPA09901 | 3  | 5  | 9  | 39  | 33  | 24  | 21  | 24  | 21  |
| SMMPA09902 | 12 | 11 | 9  | 55  | 58  | 48  | 26  | 35  | 33  |
| SMMPA09903 | 15 | 18 | 12 | 24  | 19  | 21  | 22  | 18  | 16  |
| SMMPA09904 | 25 | 24 | 19 | 122 | 103 | 97  | 74  | 79  | 74  |
| SMMPA09905 | 15 | 9  | 20 | 47  | 58  | 36  | 28  | 55  | 43  |
| SMMPA09906 | 22 | 37 | 20 | 162 | 119 | 124 | 75  | 124 | 135 |
| SMMPA09907 | 19 | 10 | 12 | 28  | 46  | 30  | 37  | 47  | 41  |
| SMMPA09908 | 6  | 9  | 11 | 45  | 30  | 34  | 20  | 47  | 33  |
| SMMPA09909 | 24 | 19 | 20 | 40  | 33  | 33  | 34  | 30  | 36  |
| SMMPA09910 | 20 | 17 | 21 | 597 | 565 | 411 | 223 | 310 | 260 |
| SMMPA09911 | 13 | 25 | 20 | 274 | 226 | 223 | 181 | 227 | 210 |
| SMMPA09912 | 14 | 17 | 15 | 108 | 87  | 75  | 49  | 56  | 52  |
| SMMPA09913 | 40 | 50 | 40 | 210 | 223 | 198 | 126 | 161 | 135 |
| SMMPA09914 | 18 | 20 | 10 | 30  | 17  | 21  | 27  | 53  | 49  |
| SMMPA09915 | 20 | 12 | 20 | 301 | 266 | 218 | 153 | 199 | 174 |
| SMMPA09916 | 25 | 25 | 23 | 90  | 84  | 67  | 58  | 69  | 60  |
| SMMPA09917 | 24 | 34 | 28 | 261 | 211 | 169 | 87  | 107 | 110 |
| SMMPA09918 | 20 | 24 | 19 | 47  | 37  | 31  | 25  | 47  | 39  |
| SMMPA09919 | 18 | 32 | 16 | 63  | 74  | 54  | 31  | 42  | 38  |
| SMMPA09920 | 20 | 26 | 11 | 332 | 301 | 265 | 210 | 241 | 212 |
| SMMPA09921 | 31 | 40 | 22 | 111 | 100 | 95  | 62  | 84  | 84  |
| SMMPA09922 | 25 | 25 | 24 | 89  | 64  | 72  | 52  | 62  | 64  |
| SMMPA09923 | 17 | 11 | 24 | 199 | 178 | 141 | 106 | 131 | 119 |
| SMMPA09924 | 14 | 9  | 12 | 283 | 249 | 234 | 88  | 121 | 137 |
| SMMPA09925 | 24 | 20 | 30 | 140 | 109 | 81  | 94  | 120 | 96  |

|            |    |    |    |      |      |      |     |     |     |
|------------|----|----|----|------|------|------|-----|-----|-----|
| SMMPA09926 | 34 | 38 | 39 | 745  | 684  | 572  | 352 | 440 | 412 |
| SMMPA09927 | 23 | 30 | 28 | 492  | 473  | 422  | 324 | 392 | 414 |
| SMMPA09928 | 23 | 25 | 14 | 258  | 237  | 187  | 187 | 231 | 214 |
| SMMPA09929 | 16 | 15 | 18 | 246  | 211  | 195  | 99  | 128 | 127 |
| SMMPA09930 | 26 | 41 | 27 | 325  | 302  | 240  | 128 | 180 | 184 |
| SMMPA09931 | 19 | 25 | 18 | 401  | 359  | 299  | 151 | 233 | 195 |
| SMMPA09932 | 27 | 31 | 25 | 960  | 899  | 844  | 522 | 654 | 588 |
| SMMPA09933 | 16 | 31 | 25 | 88   | 99   | 77   | 44  | 57  | 62  |
| SMMPA09934 | 59 | 82 | 50 | 615  | 584  | 488  | 365 | 479 | 411 |
| SMMPA09935 | 32 | 32 | 24 | 80   | 102  | 80   | 49  | 55  | 58  |
| SMMPA09936 | 26 | 32 | 28 | 79   | 80   | 56   | 46  | 39  | 39  |
| SMMPA09937 | 16 | 14 | 12 | 46   | 54   | 32   | 33  | 38  | 39  |
| SMMPA09938 | 8  | 7  | 10 | 279  | 325  | 316  | 104 | 148 | 122 |
| SMMPA09939 | 14 | 11 | 14 | 62   | 58   | 51   | 24  | 31  | 39  |
| SMMPA09940 | 25 | 30 | 15 | 65   | 69   | 51   | 27  | 45  | 39  |
| SMMPA09941 | 25 | 22 | 15 | 40   | 37   | 29   | 37  | 38  | 39  |
| SMMPA09942 | 11 | 7  | 7  | 60   | 75   | 74   | 24  | 34  | 35  |
| SMMPA09943 | 18 | 18 | 17 | 68   | 82   | 41   | 43  | 58  | 58  |
| SMMPA09944 | 5  | 4  | 6  | 49   | 34   | 41   | 13  | 21  | 12  |
| SMMPA09945 | 11 | 8  | 14 | 52   | 43   | 45   | 24  | 25  | 25  |
| SMMPA09946 | 9  | 7  | 1  | 15   | 21   | 27   | 5   | 9   | 8   |
| SMMPA09947 | 29 | 22 | 20 | 124  | 99   | 86   | 51  | 70  | 55  |
| SMMPA09948 | 27 | 33 | 38 | 110  | 76   | 52   | 40  | 61  | 57  |
| SMMPA09949 | 20 | 15 | 35 | 30   | 31   | 30   | 16  | 28  | 31  |
| SMMPA09950 | 0  | 1  | 0  | 8    | 16   | 7    | 3   | 3   | 3   |
| SMMPA09951 | 6  | 6  | 4  | 36   | 26   | 41   | 11  | 21  | 17  |
| SMMPA09952 | 12 | 13 | 10 | 20   | 11   | 18   | 9   | 12  | 16  |
| SMMPA09953 | 58 | 66 | 54 | 58   | 50   | 55   | 43  | 55  | 68  |
| SMMPA09954 | 15 | 24 | 15 | 29   | 29   | 27   | 17  | 25  | 24  |
| SMMPA09955 | 26 | 41 | 35 | 31   | 32   | 19   | 37  | 30  | 36  |
| SMMPA09956 | 18 | 16 | 9  | 26   | 27   | 26   | 13  | 10  | 16  |
| SMMPA09957 | 15 | 7  | 14 | 11   | 15   | 18   | 6   | 11  | 12  |
| SMMPA09958 | 38 | 42 | 33 | 49   | 48   | 50   | 54  | 63  | 57  |
| SMMPA09959 | 6  | 9  | 8  | 19   | 21   | 12   | 13  | 19  | 25  |
| SMMPA09960 | 10 | 10 | 9  | 17   | 13   | 15   | 10  | 20  | 14  |
| SMMPA09961 | 24 | 29 | 15 | 255  | 241  | 187  | 142 | 187 | 173 |
| SMMPA09962 | 19 | 22 | 11 | 408  | 339  | 313  | 148 | 165 | 169 |
| SMMPA09963 | 24 | 20 | 25 | 393  | 341  | 319  | 131 | 192 | 175 |
| SMMPA09964 | 12 | 15 | 19 | 546  | 482  | 451  | 233 | 278 | 245 |
| SMMPA09965 | 32 | 40 | 34 | 1075 | 1084 | 1048 | 455 | 636 | 593 |
| SMMPA09966 | 14 | 14 | 14 | 487  | 453  | 451  | 198 | 255 | 225 |

|            |    |    |    |     |     |     |     |     |     |
|------------|----|----|----|-----|-----|-----|-----|-----|-----|
| SMMPA09967 | 6  | 9  | 12 | 205 | 229 | 256 | 94  | 123 | 92  |
| SMMPA09968 | 9  | 12 | 7  | 146 | 126 | 129 | 64  | 65  | 63  |
| SMMPA09969 | 12 | 8  | 11 | 276 | 289 | 243 | 131 | 159 | 157 |
| SMMPA09970 | 32 | 17 | 26 | 51  | 54  | 43  | 42  | 55  | 65  |
| SMMPA09971 | 11 | 9  | 13 | 24  | 13  | 14  | 12  | 16  | 14  |
| SMMPA09972 | 25 | 33 | 18 | 69  | 54  | 65  | 45  | 60  | 47  |
| SMMPA09973 | 16 | 23 | 18 | 56  | 65  | 62  | 34  | 66  | 47  |
| SMMPA09974 | 21 | 13 | 15 | 167 | 178 | 107 | 51  | 63  | 78  |
| SMMPA09975 | 18 | 20 | 20 | 138 | 106 | 84  | 62  | 102 | 102 |
| SMMPA09976 | 11 | 15 | 17 | 41  | 30  | 19  | 30  | 30  | 30  |
| SMMPA09977 | 16 | 15 | 13 | 32  | 29  | 19  | 21  | 32  | 18  |
| SMMPA09978 | 15 | 31 | 22 | 80  | 63  | 68  | 51  | 55  | 61  |
| SMMPA09979 | 47 | 50 | 31 | 184 | 154 | 153 | 93  | 111 | 126 |
| SMMPA09980 | 10 | 9  | 12 | 98  | 65  | 60  | 32  | 42  | 39  |
| SMMPA09981 | 26 | 34 | 23 | 80  | 58  | 42  | 58  | 51  | 42  |
| SMMPA09982 | 31 | 27 | 20 | 121 | 106 | 81  | 70  | 114 | 89  |
| SMMPA09983 | 25 | 27 | 22 | 101 | 129 | 85  | 75  | 107 | 104 |
| SMMPA09984 | 18 | 17 | 13 | 37  | 35  | 30  | 21  | 37  | 41  |
| SMMPA09985 | 29 | 20 | 17 | 321 | 291 | 255 | 110 | 147 | 125 |
| SMMPA09986 | 7  | 14 | 12 | 146 | 138 | 119 | 52  | 68  | 45  |
| SMMPA09987 | 25 | 27 | 16 | 70  | 77  | 57  | 62  | 76  | 73  |
| SMMPA09988 | 34 | 34 | 22 | 348 | 308 | 243 | 138 | 149 | 152 |
| SMMPA09989 | 14 | 31 | 17 | 176 | 191 | 140 | 79  | 116 | 103 |
| SMMPA09990 | 23 | 19 | 24 | 274 | 233 | 173 | 77  | 113 | 74  |
| SMMPA09991 | 90 | 70 | 66 | 272 | 223 | 177 | 115 | 149 | 147 |
| SMMPA09992 | 10 | 9  | 9  | 64  | 91  | 62  | 56  | 65  | 64  |
| SMMPA09993 | 11 | 11 | 10 | 60  | 54  | 39  | 24  | 31  | 34  |
| SMMPA09994 | 16 | 14 | 23 | 242 | 221 | 171 | 100 | 126 | 131 |
| SMMPA09995 | 19 | 20 | 21 | 31  | 21  | 28  | 35  | 44  | 38  |
| SMMPA09996 | 18 | 21 | 23 | 155 | 136 | 117 | 51  | 75  | 71  |
| SMMPA09997 | 13 | 8  | 6  | 81  | 74  | 68  | 42  | 65  | 66  |
| SMMPA09998 | 19 | 15 | 18 | 113 | 104 | 71  | 34  | 57  | 51  |
| SMMPA09999 | 15 | 16 | 11 | 37  | 33  | 23  | 12  | 22  | 26  |
| SMMPA10000 | 4  | 8  | 5  | 19  | 21  | 9   | 6   | 15  | 16  |
| SMMPA10001 | 11 | 14 | 11 | 44  | 43  | 34  | 24  | 20  | 34  |
| SMMPA10002 | 7  | 8  | 7  | 40  | 38  | 33  | 12  | 13  | 15  |
| SMMPA10003 | 17 | 15 | 12 | 19  | 27  | 19  | 29  | 29  | 18  |
| SMMPA10004 | 19 | 29 | 28 | 37  | 45  | 26  | 44  | 39  | 36  |
| SMMPA10005 | 2  | 0  | 0  | 16  | 14  | 14  | 10  | 6   | 6   |
| SMMPA10006 | 19 | 19 | 11 | 70  | 74  | 68  | 27  | 54  | 60  |
| SMMPA10007 | 18 | 14 | 14 | 558 | 514 | 497 | 342 | 396 | 421 |

|            |    |    |    |     |     |     |     |     |     |
|------------|----|----|----|-----|-----|-----|-----|-----|-----|
| SMMPA10008 | 25 | 26 | 26 | 105 | 89  | 68  | 49  | 67  | 70  |
| SMMPA10009 | 31 | 33 | 22 | 805 | 750 | 700 | 364 | 479 | 415 |
| SMMPA10010 | 14 | 12 | 8  | 40  | 30  | 33  | 24  | 26  | 18  |
| SMMPA10011 | 6  | 13 | 8  | 57  | 43  | 45  | 38  | 34  | 18  |
| SMMPA10012 | 19 | 18 | 14 | 52  | 53  | 39  | 20  | 40  | 31  |
| SMMPA10013 | 50 | 51 | 49 | 243 | 224 | 175 | 88  | 146 | 117 |
| SMMPA10014 | 15 | 20 | 20 | 107 | 103 | 70  | 67  | 56  | 65  |
| SMMPA10015 | 3  | 11 | 10 | 8   | 10  | 5   | 16  | 11  | 15  |
| SMMPA10016 | 10 | 17 | 24 | 71  | 60  | 47  | 17  | 52  | 49  |
| SMMPA10017 | 18 | 21 | 14 | 37  | 40  | 31  | 29  | 53  | 32  |
| SMMPA10018 | 32 | 33 | 26 | 316 | 334 | 270 | 115 | 175 | 142 |
| SMMPA10019 | 18 | 14 | 8  | 50  | 54  | 49  | 24  | 28  | 41  |
| SMMPA10020 | 37 | 38 | 24 | 262 | 257 | 226 | 145 | 161 | 169 |
| SMMPA10021 | 18 | 19 | 8  | 68  | 98  | 53  | 27  | 40  | 33  |
| SMMPA10022 | 28 | 25 | 27 | 45  | 36  | 36  | 35  | 59  | 42  |
| SMMPA10023 | 16 | 18 | 13 | 18  | 17  | 23  | 15  | 24  | 28  |
| SMMPA10024 | 24 | 24 | 20 | 54  | 43  | 41  | 30  | 34  | 32  |
| SMMPA10025 | 10 | 3  | 8  | 10  | 9   | 7   | 11  | 8   | 7   |
| SMMPA10026 | 7  | 21 | 8  | 29  | 37  | 31  | 29  | 33  | 24  |
| SMMPA10027 | 21 | 29 | 17 | 51  | 44  | 37  | 34  | 41  | 52  |
| SMMPA10028 | 16 | 19 | 11 | 84  | 70  | 65  | 35  | 59  | 48  |
| SMMPA10029 | 5  | 17 | 19 | 102 | 93  | 85  | 56  | 106 | 85  |
| SMMPA10030 | 13 | 14 | 12 | 139 | 128 | 105 | 78  | 101 | 92  |
| SMMPA10031 | 24 | 15 | 18 | 65  | 65  | 45  | 38  | 57  | 31  |
| SMMPA10032 | 20 | 32 | 10 | 135 | 95  | 88  | 57  | 52  | 57  |
| SMMPA10033 | 11 | 15 | 12 | 226 | 182 | 148 | 150 | 223 | 176 |
| SMMPA10034 | 27 | 29 | 26 | 80  | 77  | 64  | 45  | 59  | 51  |
| SMMPA10035 | 22 | 23 | 17 | 131 | 99  | 80  | 67  | 81  | 70  |
| SMMPA10036 | 22 | 19 | 24 | 20  | 15  | 17  | 26  | 34  | 26  |
| SMMPA10037 | 11 | 5  | 10 | 7   | 12  | 9   | 6   | 12  | 11  |
| SMMPA10038 | 28 | 32 | 35 | 63  | 68  | 50  | 35  | 44  | 46  |
| SMMPA10039 | 17 | 30 | 22 | 28  | 26  | 21  | 19  | 25  | 17  |
| SMMPA10040 | 19 | 16 | 25 | 21  | 21  | 17  | 34  | 40  | 39  |
| SMMPA10041 | 22 | 18 | 24 | 75  | 58  | 53  | 38  | 49  | 53  |
| SMMPA10042 | 22 | 16 | 15 | 22  | 32  | 30  | 32  | 36  | 31  |
| SMMPA10043 | 25 | 32 | 22 | 59  | 52  | 49  | 54  | 82  | 61  |
| SMMPA10044 | 17 | 19 | 10 | 34  | 32  | 22  | 31  | 32  | 34  |
| SMMPA10045 | 13 | 25 | 24 | 36  | 41  | 29  | 35  | 42  | 63  |
| SMMPA10046 | 4  | 3  | 5  | 17  | 22  | 12  | 11  | 9   | 18  |
| SMMPA10047 | 16 | 22 | 20 | 59  | 73  | 52  | 45  | 58  | 66  |
| SMMPA10048 | 17 | 13 | 11 | 36  | 18  | 20  | 36  | 30  | 23  |

|            |    |    |    |     |     |     |     |     |     |
|------------|----|----|----|-----|-----|-----|-----|-----|-----|
| SMMPA10049 | 11 | 15 | 24 | 29  | 35  | 45  | 42  | 50  | 48  |
| SMMPA10050 | 32 | 22 | 20 | 63  | 81  | 65  | 62  | 67  | 53  |
| SMMPA10051 | 18 | 18 | 23 | 120 | 96  | 82  | 69  | 72  | 81  |
| SMMPA10052 | 6  | 8  | 9  | 70  | 56  | 45  | 23  | 46  | 24  |
| SMMPA10053 | 25 | 20 | 26 | 352 | 331 | 228 | 178 | 246 | 206 |
| SMMPA10054 | 25 | 28 | 18 | 105 | 92  | 101 | 59  | 81  | 68  |
| SMMPA10055 | 22 | 23 | 27 | 274 | 283 | 230 | 146 | 178 | 203 |
| SMMPA10056 | 22 | 25 | 15 | 158 | 158 | 128 | 108 | 128 | 97  |
| SMMPA10057 | 89 | 68 | 78 | 277 | 258 | 197 | 148 | 230 | 175 |
| SMMPA10058 | 19 | 13 | 22 | 316 | 268 | 220 | 108 | 133 | 131 |
| SMMPA10059 | 6  | 3  | 5  | 99  | 99  | 74  | 31  | 66  | 40  |
| SMMPA10060 | 3  | 8  | 11 | 61  | 51  | 46  | 21  | 44  | 32  |
| SMMPA10061 | 19 | 17 | 23 | 49  | 43  | 33  | 33  | 46  | 48  |
| SMMPA10062 | 17 | 19 | 18 | 102 | 70  | 61  | 46  | 62  | 48  |
| SMMPA10063 | 25 | 31 | 22 | 32  | 42  | 27  | 32  | 38  | 24  |
| SMMPA10064 | 16 | 18 | 15 | 36  | 36  | 41  | 28  | 39  | 30  |
| SMMPA10065 | 20 | 25 | 20 | 23  | 25  | 21  | 20  | 29  | 22  |
| SMMPA10066 | 18 | 28 | 21 | 31  | 25  | 34  | 23  | 31  | 38  |
| SMMPA10067 | 49 | 53 | 55 | 41  | 42  | 50  | 49  | 54  | 60  |
| SMMPA10068 | 20 | 26 | 23 | 27  | 20  | 25  | 12  | 16  | 18  |
| SMMPA10069 | 18 | 21 | 16 | 29  | 32  | 21  | 15  | 31  | 28  |
| SMMPA10070 | 24 | 34 | 27 | 78  | 61  | 66  | 35  | 29  | 37  |
| SMMPA10071 | 10 | 16 | 15 | 29  | 27  | 18  | 28  | 24  | 25  |
| SMMPA10072 | 13 | 12 | 8  | 25  | 26  | 21  | 15  | 14  | 9   |
| SMMPA10073 | 10 | 12 | 7  | 10  | 19  | 26  | 8   | 14  | 11  |
| SMMPA10074 | 13 | 14 | 15 | 60  | 67  | 52  | 60  | 79  | 71  |
| SMMPA10075 | 29 | 31 | 21 | 89  | 79  | 79  | 51  | 52  | 66  |
| SMMPA10076 | 17 | 24 | 19 | 93  | 82  | 78  | 63  | 74  | 71  |
| SMMPA10077 | 17 | 25 | 17 | 42  | 34  | 33  | 38  | 46  | 46  |
| SMMPA10078 | 31 | 39 | 38 | 73  | 55  | 60  | 42  | 80  | 52  |
| SMMPA10079 | 35 | 31 | 17 | 51  | 51  | 46  | 48  | 41  | 52  |
| SMMPA10080 | 12 | 36 | 17 | 57  | 49  | 53  | 33  | 42  | 45  |
| SMMPA10081 | 19 | 16 | 16 | 105 | 70  | 57  | 31  | 38  | 54  |
| SMMPA10082 | 7  | 9  | 6  | 15  | 12  | 14  | 11  | 22  | 12  |
| SMMPA10083 | 36 | 27 | 27 | 55  | 58  | 35  | 40  | 49  | 48  |
| SMMPA10084 | 31 | 30 | 28 | 36  | 36  | 34  | 30  | 35  | 41  |
| SMMPA10085 | 16 | 17 | 9  | 60  | 53  | 36  | 37  | 45  | 48  |
| SMMPA10086 | 17 | 19 | 25 | 90  | 77  | 58  | 43  | 34  | 48  |
| SMMPA10087 | 6  | 10 | 9  | 54  | 53  | 47  | 29  | 31  | 45  |
| SMMPA10088 | 11 | 16 | 7  | 118 | 118 | 82  | 37  | 51  | 45  |
| SMMPA10089 | 16 | 12 | 12 | 122 | 136 | 94  | 32  | 66  | 67  |

|            |    |    |    |     |     |     |     |     |     |
|------------|----|----|----|-----|-----|-----|-----|-----|-----|
| SMMPA10090 | 15 | 9  | 14 | 40  | 32  | 33  | 23  | 44  | 42  |
| SMMPA10091 | 7  | 8  | 3  | 24  | 16  | 21  | 19  | 15  | 20  |
| SMMPA10092 | 22 | 9  | 23 | 227 | 276 | 167 | 72  | 93  | 101 |
| SMMPA10093 | 11 | 22 | 15 | 172 | 151 | 122 | 64  | 79  | 88  |
| SMMPA10094 | 15 | 11 | 15 | 271 | 281 | 204 | 111 | 110 | 113 |
| SMMPA10095 | 7  | 2  | 5  | 17  | 20  | 12  | 16  | 7   | 9   |
| SMMPA10096 | 64 | 59 | 59 | 26  | 28  | 38  | 45  | 52  | 55  |
| SMMPA10097 | 19 | 11 | 19 | 32  | 35  | 24  | 25  | 16  | 16  |
| SMMPA10098 | 19 | 24 | 26 | 118 | 93  | 71  | 36  | 89  | 72  |
| SMMPA10099 | 10 | 12 | 21 | 25  | 24  | 19  | 19  | 25  | 27  |
| SMMPA10100 | 21 | 24 | 18 | 109 | 101 | 89  | 36  | 67  | 79  |
| SMMPA10101 | 28 | 20 | 20 | 108 | 77  | 64  | 71  | 111 | 89  |
| SMMPA10102 | 20 | 26 | 19 | 103 | 85  | 86  | 43  | 46  | 48  |
| SMMPA10103 | 6  | 9  | 9  | 18  | 16  | 14  | 21  | 20  | 26  |
| SMMPA10104 | 28 | 33 | 26 | 49  | 53  | 28  | 35  | 55  | 44  |
| SMMPA10105 | 14 | 17 | 16 | 53  | 51  | 35  | 16  | 24  | 41  |
| SMMPA10106 | 22 | 26 | 27 | 163 | 170 | 123 | 144 | 160 | 156 |
| SMMPA10107 | 8  | 14 | 8  | 16  | 12  | 14  | 10  | 17  | 13  |
| SMMPA10108 | 10 | 31 | 19 | 21  | 26  | 13  | 24  | 28  | 29  |
| SMMPA10109 | 22 | 28 | 19 | 36  | 53  | 34  | 33  | 48  | 44  |
| SMMPA10110 | 5  | 10 | 4  | 12  | 16  | 11  | 11  | 8   | 9   |
| SMMPA10111 | 19 | 22 | 31 | 91  | 82  | 68  | 44  | 60  | 65  |
| SMMPA10112 | 16 | 18 | 12 | 35  | 33  | 14  | 19  | 32  | 19  |
| SMMPA10113 | 44 | 39 | 39 | 180 | 197 | 148 | 94  | 117 | 125 |
| SMMPA10114 | 15 | 21 | 8  | 58  | 33  | 31  | 18  | 25  | 23  |
| SMMPA10115 | 28 | 38 | 33 | 216 | 181 | 162 | 126 | 133 | 116 |
| SMMPA10116 | 21 | 36 | 27 | 93  | 93  | 70  | 63  | 89  | 86  |
| SMMPA10117 | 5  | 15 | 14 | 57  | 51  | 43  | 18  | 36  | 26  |
| SMMPA10118 | 18 | 25 | 24 | 218 | 161 | 163 | 67  | 99  | 102 |
| SMMPA10119 | 30 | 26 | 25 | 111 | 64  | 49  | 84  | 94  | 93  |
| SMMPA10120 | 28 | 24 | 14 | 249 | 205 | 141 | 72  | 98  | 91  |
| SMMPA10121 | 19 | 29 | 33 | 193 | 168 | 134 | 57  | 88  | 80  |
| SMMPA10122 | 20 | 19 | 17 | 65  | 56  | 46  | 34  | 36  | 39  |
| SMMPA10123 | 1  | 1  | 0  | 3   | 4   | 1   | 1   | 2   | 1   |
| SMMPA10124 | 24 | 23 | 14 | 181 | 198 | 129 | 70  | 86  | 82  |
| SMMPA10125 | 20 | 24 | 20 | 92  | 77  | 49  | 35  | 44  | 43  |
| SMMPA10126 | 32 | 56 | 32 | 357 | 315 | 261 | 99  | 153 | 132 |
| SMMPA10127 | 37 | 27 | 29 | 61  | 60  | 29  | 52  | 69  | 60  |
| SMMPA10128 | 17 | 17 | 20 | 181 | 170 | 150 | 100 | 117 | 108 |
| SMMPA10129 | 15 | 20 | 14 | 47  | 44  | 24  | 16  | 32  | 27  |
| SMMPA10130 | 20 | 22 | 23 | 164 | 126 | 116 | 42  | 53  | 66  |



|            |    |    |    |     |     |     |     |     |     |
|------------|----|----|----|-----|-----|-----|-----|-----|-----|
| SMMPA10131 | 25 | 18 | 15 | 54  | 56  | 41  | 40  | 35  | 27  |
| SMMPA10132 | 18 | 22 | 15 | 74  | 62  | 55  | 45  | 53  | 54  |
| SMMPA10133 | 19 | 23 | 20 | 65  | 57  | 55  | 21  | 40  | 31  |
| SMMPA10134 | 9  | 12 | 3  | 77  | 61  | 47  | 27  | 34  | 33  |
| SMMPA10135 | 27 | 10 | 18 | 216 | 193 | 149 | 79  | 117 | 94  |
| SMMPA10136 | 71 | 71 | 58 | 143 | 111 | 116 | 95  | 117 | 154 |
| SMMPA10137 | 52 | 51 | 46 | 116 | 108 | 84  | 79  | 102 | 108 |
| SMMPA10138 | 22 | 18 | 11 | 36  | 26  | 29  | 29  | 26  | 43  |
| SMMPA10139 | 59 | 62 | 47 | 68  | 55  | 54  | 47  | 64  | 57  |
| SMMPA10140 | 59 | 40 | 40 | 107 | 89  | 77  | 79  | 85  | 92  |
| SMMPA10141 | 26 | 45 | 26 | 73  | 64  | 55  | 36  | 61  | 49  |
| SMMPA10142 | 50 | 61 | 56 | 96  | 93  | 81  | 80  | 105 | 117 |
| SMMPA10143 | 51 | 45 | 43 | 98  | 91  | 83  | 92  | 116 | 118 |
| SMMPA10144 | 45 | 27 | 40 | 115 | 128 | 116 | 97  | 123 | 84  |
| SMMPA10145 | 58 | 70 | 39 | 115 | 111 | 99  | 81  | 112 | 125 |
| SMMPA10146 | 10 | 3  | 7  | 15  | 15  | 7   | 10  | 17  | 26  |
| SMMPA10147 | 5  | 7  | 4  | 18  | 13  | 10  | 22  | 9   | 14  |
| SMMPA10148 | 17 | 18 | 12 | 35  | 23  | 26  | 17  | 19  | 22  |
| SMMPA10149 | 51 | 46 | 26 | 69  | 76  | 56  | 67  | 109 | 95  |
| SMMPA10150 | 7  | 18 | 18 | 74  | 74  | 40  | 53  | 64  | 65  |
| SMMPA10151 | 19 | 17 | 16 | 122 | 121 | 101 | 50  | 73  | 70  |
| SMMPA10152 | 35 | 34 | 24 | 337 | 299 | 245 | 148 | 199 | 159 |
| SMMPA10153 | 23 | 26 | 16 | 147 | 125 | 124 | 85  | 110 | 91  |
| SMMPA10154 | 37 | 52 | 40 | 417 | 372 | 250 | 191 | 238 | 218 |
| SMMPA10155 | 24 | 53 | 30 | 593 | 584 | 494 | 290 | 399 | 349 |
| SMMPA10156 | 20 | 26 | 14 | 78  | 99  | 58  | 62  | 67  | 69  |
| SMMPA10157 | 29 | 18 | 31 | 265 | 240 | 201 | 110 | 152 | 162 |
| SMMPA10158 | 9  | 12 | 7  | 74  | 74  | 47  | 47  | 57  | 55  |
| SMMPA10159 | 10 | 7  | 9  | 45  | 43  | 47  | 39  | 37  | 39  |
| SMMPA10160 | 9  | 8  | 11 | 230 | 238 | 169 | 84  | 121 | 122 |
| SMMPA10161 | 12 | 17 | 6  | 371 | 301 | 293 | 77  | 115 | 88  |
| SMMPA10162 | 9  | 4  | 0  | 13  | 20  | 16  | 12  | 15  | 11  |
| SMMPA10163 | 18 | 25 | 21 | 136 | 114 | 101 | 57  | 73  | 89  |
| SMMPA10164 | 11 | 17 | 10 | 20  | 14  | 15  | 24  | 23  | 22  |
| SMMPA10165 | 11 | 6  | 17 | 157 | 111 | 134 | 75  | 112 | 112 |
| SMMPA10166 | 14 | 18 | 17 | 171 | 136 | 114 | 70  | 91  | 95  |
| SMMPA10167 | 11 | 9  | 14 | 60  | 54  | 57  | 36  | 47  | 50  |
| SMMPA10168 | 27 | 24 | 25 | 120 | 101 | 80  | 66  | 81  | 80  |
| SMMPA10169 | 10 | 21 | 7  | 203 | 162 | 137 | 76  | 106 | 87  |
| SMMPA10170 | 3  | 3  | 3  | 13  | 20  | 10  | 12  | 12  | 10  |
| SMMPA10171 | 20 | 28 | 20 | 177 | 158 | 131 | 102 | 144 | 115 |

|            |    |    |    |     |     |     |     |     |     |
|------------|----|----|----|-----|-----|-----|-----|-----|-----|
| SMMPA10172 | 11 | 7  | 7  | 23  | 19  | 12  | 11  | 27  | 19  |
| SMMPA10173 | 27 | 27 | 18 | 53  | 62  | 49  | 29  | 31  | 48  |
| SMMPA10174 | 25 | 20 | 29 | 117 | 130 | 85  | 72  | 94  | 87  |
| SMMPA10175 | 16 | 19 | 12 | 107 | 65  | 64  | 27  | 39  | 49  |
| SMMPA10176 | 25 | 31 | 25 | 211 | 233 | 173 | 90  | 140 | 115 |
| SMMPA10177 | 21 | 31 | 19 | 160 | 128 | 105 | 67  | 78  | 64  |
| SMMPA10178 | 14 | 18 | 7  | 95  | 88  | 74  | 43  | 49  | 49  |
| SMMPA10179 | 21 | 24 | 17 | 83  | 66  | 53  | 39  | 49  | 52  |
| SMMPA10180 | 9  | 8  | 1  | 19  | 20  | 18  | 13  | 20  | 9   |
| SMMPA10181 | 13 | 16 | 16 | 17  | 21  | 15  | 22  | 9   | 19  |
| SMMPA10182 | 23 | 25 | 16 | 68  | 72  | 50  | 43  | 62  | 54  |
| SMMPA10183 | 24 | 25 | 18 | 45  | 38  | 24  | 34  | 43  | 35  |
| SMMPA10184 | 23 | 18 | 21 | 62  | 59  | 53  | 32  | 46  | 45  |
| SMMPA10185 | 46 | 54 | 38 | 384 | 302 | 253 | 172 | 207 | 200 |
| SMMPA10186 | 15 | 26 | 19 | 53  | 58  | 49  | 29  | 34  | 36  |
| SMMPA10187 | 24 | 26 | 39 | 61  | 50  | 48  | 33  | 30  | 50  |
| SMMPA10188 | 21 | 31 | 26 | 38  | 25  | 22  | 23  | 35  | 37  |
| SMMPA10189 | 18 | 24 | 21 | 63  | 76  | 48  | 50  | 51  | 62  |
| SMMPA10190 | 28 | 22 | 22 | 279 | 285 | 217 | 111 | 159 | 163 |
| SMMPA10191 | 33 | 28 | 19 | 126 | 117 | 109 | 70  | 99  | 89  |
| SMMPA10192 | 17 | 22 | 15 | 99  | 86  | 56  | 21  | 37  | 23  |
| SMMPA10193 | 13 | 20 | 22 | 247 | 199 | 193 | 109 | 147 | 130 |
| SMMPA10194 | 12 | 25 | 15 | 88  | 90  | 69  | 39  | 74  | 63  |
| SMMPA10195 | 11 | 20 | 11 | 120 | 127 | 93  | 46  | 91  | 69  |
| SMMPA10196 | 27 | 33 | 18 | 78  | 64  | 52  | 42  | 59  | 55  |
| SMMPA10197 | 25 | 20 | 26 | 96  | 109 | 75  | 52  | 75  | 63  |
| SMMPA10198 | 45 | 48 | 37 | 314 | 319 | 234 | 135 | 197 | 160 |
| SMMPA10199 | 45 | 33 | 32 | 238 | 226 | 186 | 137 | 151 | 148 |
| SMMPA10200 | 20 | 19 | 14 | 112 | 118 | 94  | 45  | 77  | 73  |
| SMMPA10201 | 18 | 31 | 21 | 154 | 110 | 86  | 90  | 78  | 97  |
| SMMPA10202 | 36 | 27 | 26 | 39  | 26  | 38  | 33  | 31  | 32  |
| SMMPA10203 | 23 | 25 | 22 | 48  | 51  | 35  | 35  | 53  | 38  |
| SMMPA10204 | 25 | 30 | 14 | 23  | 26  | 23  | 35  | 38  | 44  |
| SMMPA10205 | 22 | 27 | 29 | 31  | 40  | 47  | 30  | 57  | 55  |
| SMMPA10206 | 33 | 38 | 24 | 30  | 49  | 37  | 33  | 45  | 48  |
| SMMPA10207 | 32 | 20 | 22 | 60  | 45  | 57  | 43  | 60  | 64  |
| SMMPA10208 | 28 | 17 | 18 | 37  | 29  | 33  | 45  | 53  | 67  |
| SMMPA10209 | 41 | 32 | 21 | 72  | 75  | 50  | 54  | 91  | 75  |
| SMMPA10210 | 23 | 18 | 14 | 16  | 13  | 14  | 19  | 21  | 26  |
| SMMPA10211 | 19 | 20 | 17 | 44  | 41  | 32  | 23  | 57  | 40  |
| SMMPA10212 | 23 | 23 | 19 | 23  | 32  | 24  | 27  | 35  | 29  |

|            |    |    |    |     |     |     |     |     |     |
|------------|----|----|----|-----|-----|-----|-----|-----|-----|
| SMMPA10213 | 16 | 13 | 15 | 33  | 43  | 23  | 14  | 35  | 26  |
| SMMPA10214 | 38 | 29 | 28 | 61  | 62  | 45  | 47  | 63  | 58  |
| SMMPA10215 | 22 | 29 | 28 | 84  | 59  | 66  | 43  | 71  | 59  |
| SMMPA10216 | 12 | 23 | 16 | 48  | 30  | 44  | 29  | 60  | 39  |
| SMMPA10217 | 18 | 27 | 13 | 41  | 35  | 34  | 33  | 39  | 41  |
| SMMPA10218 | 26 | 25 | 27 | 131 | 153 | 109 | 86  | 91  | 76  |
| SMMPA10219 | 21 | 24 | 18 | 88  | 73  | 72  | 42  | 54  | 69  |
| SMMPA10220 | 32 | 40 | 35 | 402 | 366 | 279 | 161 | 185 | 189 |
| SMMPA10221 | 27 | 33 | 22 | 97  | 92  | 68  | 61  | 63  | 70  |
| SMMPA10222 | 21 | 24 | 20 | 320 | 280 | 219 | 92  | 132 | 118 |
| SMMPA10223 | 37 | 23 | 30 | 137 | 124 | 74  | 56  | 62  | 91  |
| SMMPA10224 | 27 | 19 | 24 | 272 | 212 | 179 | 93  | 111 | 120 |
| SMMPA10225 | 19 | 28 | 16 | 75  | 73  | 55  | 33  | 34  | 46  |
| SMMPA10226 | 15 | 11 | 13 | 37  | 55  | 35  | 34  | 34  | 45  |
| SMMPA10227 | 22 | 24 | 21 | 160 | 112 | 91  | 68  | 70  | 61  |
| SMMPA10228 | 15 | 19 | 19 | 122 | 106 | 83  | 58  | 104 | 82  |
| SMMPA10229 | 17 | 21 | 21 | 380 | 348 | 286 | 150 | 205 | 186 |
| SMMPA10230 | 13 | 6  | 10 | 19  | 24  | 31  | 16  | 14  | 26  |
| SMMPA10231 | 37 | 34 | 37 | 538 | 468 | 431 | 223 | 324 | 281 |
| SMMPA10232 | 47 | 51 | 43 | 222 | 211 | 176 | 146 | 169 | 174 |
| SMMPA10233 | 34 | 32 | 30 | 283 | 277 | 221 | 179 | 222 | 204 |
| SMMPA10234 | 13 | 15 | 16 | 194 | 178 | 145 | 93  | 117 | 122 |
| SMMPA10235 | 7  | 13 | 7  | 163 | 128 | 109 | 74  | 77  | 80  |
| SMMPA10236 | 34 | 45 | 29 | 294 | 271 | 208 | 140 | 196 | 158 |
| SMMPA10237 | 9  | 7  | 8  | 67  | 62  | 53  | 14  | 32  | 29  |
| SMMPA10238 | 13 | 13 | 19 | 15  | 22  | 17  | 9   | 23  | 21  |
| SMMPA10239 | 28 | 25 | 21 | 35  | 29  | 26  | 24  | 26  | 33  |
| SMMPA10240 | 26 | 15 | 19 | 12  | 12  | 19  | 15  | 23  | 31  |
| SMMPA10241 | 7  | 12 | 15 | 19  | 27  | 21  | 27  | 26  | 19  |
| SMMPA10242 | 24 | 23 | 15 | 36  | 38  | 24  | 20  | 31  | 25  |
| SMMPA10243 | 25 | 14 | 20 | 37  | 40  | 25  | 16  | 32  | 21  |
| SMMPA10244 | 13 | 9  | 10 | 15  | 24  | 10  | 7   | 16  | 12  |
| SMMPA10245 | 14 | 24 | 15 | 30  | 21  | 30  | 29  | 51  | 19  |
| SMMPA10246 | 21 | 16 | 6  | 44  | 41  | 27  | 25  | 27  | 32  |
| SMMPA10247 | 13 | 20 | 21 | 40  | 44  | 49  | 27  | 28  | 39  |
| SMMPA10248 | 7  | 7  | 13 | 10  | 13  | 11  | 6   | 12  | 11  |
| SMMPA10249 | 77 | 80 | 58 | 33  | 40  | 32  | 44  | 52  | 51  |
| SMMPA10250 | 37 | 31 | 24 | 45  | 34  | 35  | 46  | 67  | 53  |
| SMMPA10251 | 45 | 42 | 28 | 54  | 44  | 43  | 36  | 45  | 41  |
| SMMPA10252 | 14 | 17 | 10 | 30  | 23  | 20  | 18  | 30  | 26  |
| SMMPA10253 | 38 | 56 | 48 | 140 | 96  | 101 | 63  | 91  | 102 |

|            |    |    |    |     |     |     |     |     |     |
|------------|----|----|----|-----|-----|-----|-----|-----|-----|
| SMMPA10254 | 76 | 83 | 93 | 41  | 41  | 29  | 35  | 58  | 57  |
| SMMPA10255 | 27 | 32 | 15 | 30  | 30  | 31  | 29  | 38  | 27  |
| SMMPA10256 | 12 | 13 | 15 | 26  | 29  | 27  | 25  | 16  | 28  |
| SMMPA10257 | 22 | 24 | 29 | 65  | 36  | 42  | 27  | 22  | 34  |
| SMMPA10258 | 41 | 34 | 29 | 47  | 47  | 34  | 24  | 35  | 50  |
| SMMPA10259 | 20 | 21 | 29 | 46  | 36  | 38  | 44  | 54  | 48  |
| SMMPA10260 | 27 | 29 | 21 | 31  | 32  | 19  | 25  | 22  | 30  |
| SMMPA10261 | 53 | 38 | 36 | 56  | 52  | 33  | 40  | 57  | 56  |
| SMMPA10262 | 45 | 44 | 32 | 88  | 80  | 54  | 65  | 77  | 93  |
| SMMPA10263 | 30 | 25 | 26 | 53  | 57  | 43  | 34  | 35  | 38  |
| SMMPA10264 | 64 | 69 | 61 | 69  | 62  | 75  | 71  | 92  | 67  |
| SMMPA10265 | 31 | 30 | 28 | 203 | 182 | 136 | 121 | 191 | 141 |
| SMMPA10266 | 3  | 7  | 5  | 4   | 3   | 10  | 7   | 11  | 11  |
| SMMPA10267 | 19 | 12 | 20 | 52  | 39  | 28  | 30  | 37  | 27  |
| SMMPA10268 | 42 | 35 | 41 | 76  | 66  | 56  | 37  | 55  | 59  |
| SMMPA10269 | 24 | 21 | 22 | 81  | 69  | 59  | 46  | 51  | 49  |
| SMMPA10270 | 21 | 14 | 16 | 94  | 80  | 57  | 57  | 75  | 76  |
| SMMPA10271 | 26 | 20 | 21 | 62  | 50  | 33  | 55  | 57  | 68  |
| SMMPA10272 | 12 | 11 | 8  | 111 | 104 | 86  | 85  | 99  | 112 |
| SMMPA10273 | 11 | 19 | 11 | 48  | 41  | 36  | 24  | 28  | 34  |
| SMMPA10274 | 22 | 41 | 21 | 295 | 278 | 205 | 108 | 123 | 117 |
| SMMPA10275 | 25 | 15 | 15 | 103 | 93  | 65  | 55  | 63  | 46  |
| SMMPA10276 | 19 | 12 | 11 | 112 | 103 | 68  | 53  | 63  | 63  |
| SMMPA10277 | 27 | 29 | 17 | 242 | 246 | 137 | 90  | 126 | 121 |
| SMMPA10278 | 42 | 33 | 33 | 74  | 71  | 52  | 43  | 63  | 63  |
| SMMPA10279 | 22 | 30 | 19 | 43  | 39  | 30  | 32  | 36  | 37  |
| SMMPA10280 | 21 | 26 | 25 | 45  | 44  | 36  | 32  | 45  | 36  |
| SMMPA10281 | 15 | 12 | 14 | 29  | 30  | 18  | 22  | 36  | 27  |
| SMMPA10282 | 28 | 25 | 15 | 44  | 32  | 33  | 34  | 47  | 30  |
| SMMPA10283 | 30 | 28 | 19 | 87  | 82  | 59  | 54  | 79  | 81  |
| SMMPA10284 | 16 | 9  | 16 | 26  | 16  | 20  | 10  | 32  | 15  |
| SMMPA10285 | 13 | 8  | 7  | 100 | 73  | 69  | 47  | 60  | 52  |
| SMMPA10286 | 19 | 24 | 19 | 110 | 113 | 101 | 59  | 75  | 68  |
| SMMPA10287 | 31 | 21 | 22 | 41  | 26  | 30  | 41  | 40  | 34  |
| SMMPA10288 | 83 | 70 | 60 | 59  | 56  | 60  | 70  | 103 | 91  |
| SMMPA10289 | 17 | 24 | 29 | 62  | 71  | 66  | 39  | 45  | 35  |
| SMMPA10290 | 64 | 75 | 58 | 55  | 51  | 46  | 87  | 106 | 88  |
| SMMPA10291 | 33 | 33 | 30 | 17  | 27  | 18  | 43  | 40  | 37  |
| SMMPA10292 | 12 | 28 | 13 | 43  | 41  | 32  | 36  | 40  | 42  |
| SMMPA10293 | 30 | 32 | 30 | 87  | 75  | 54  | 47  | 66  | 64  |
| SMMPA10294 | 34 | 14 | 24 | 76  | 62  | 56  | 33  | 60  | 49  |

|            |    |    |    |     |     |     |     |     |     |
|------------|----|----|----|-----|-----|-----|-----|-----|-----|
| SMMPA10295 | 45 | 41 | 32 | 75  | 58  | 41  | 47  | 54  | 55  |
| SMMPA10296 | 10 | 6  | 6  | 12  | 6   | 15  | 8   | 14  | 2   |
| SMMPA10297 | 21 | 7  | 13 | 120 | 102 | 79  | 61  | 91  | 64  |
| SMMPA10298 | 6  | 1  | 4  | 59  | 53  | 40  | 29  | 26  | 28  |
| SMMPA10299 | 10 | 13 | 10 | 86  | 72  | 60  | 37  | 53  | 45  |
| SMMPA10300 | 23 | 30 | 24 | 202 | 175 | 133 | 118 | 167 | 133 |
| SMMPA10301 | 7  | 18 | 12 | 128 | 105 | 84  | 64  | 88  | 87  |
| SMMPA10302 | 5  | 2  | 9  | 52  | 40  | 39  | 29  | 31  | 27  |
| SMMPA10303 | 22 | 11 | 15 | 201 | 204 | 160 | 137 | 185 | 166 |
| SMMPA10304 | 22 | 18 | 9  | 151 | 136 | 93  | 101 | 119 | 112 |
| SMMPA10305 | 8  | 16 | 16 | 56  | 52  | 39  | 60  | 61  | 49  |
| SMMPA10306 | 18 | 19 | 19 | 20  | 17  | 23  | 17  | 27  | 26  |
| SMMPA10307 | 10 | 17 | 16 | 48  | 38  | 31  | 28  | 34  | 35  |
| SMMPA10308 | 7  | 4  | 12 | 12  | 18  | 9   | 14  | 24  | 16  |
| SMMPA10309 | 4  | 8  | 10 | 80  | 88  | 71  | 52  | 84  | 78  |
| SMMPA10310 | 6  | 4  | 7  | 35  | 32  | 29  | 18  | 25  | 24  |
| SMMPA10311 | 2  | 2  | 5  | 59  | 24  | 26  | 27  | 41  | 39  |
| SMMPA10312 | 18 | 11 | 16 | 89  | 87  | 67  | 44  | 76  | 68  |
| SMMPA10313 | 8  | 7  | 10 | 70  | 71  | 35  | 42  | 70  | 62  |
| SMMPA10314 | 16 | 14 | 12 | 36  | 32  | 23  | 35  | 36  | 40  |
| SMMPA10315 | 6  | 10 | 8  | 36  | 29  | 28  | 22  | 28  | 31  |
| SMMPA10316 | 24 | 21 | 27 | 72  | 67  | 51  | 57  | 63  | 54  |
| SMMPA10317 | 11 | 18 | 19 | 30  | 31  | 38  | 35  | 44  | 52  |
| SMMPA10318 | 28 | 22 | 24 | 102 | 78  | 74  | 45  | 72  | 65  |
| SMMPA10319 | 17 | 19 | 25 | 32  | 24  | 29  | 32  | 28  | 44  |
| SMMPA10320 | 30 | 29 | 19 | 25  | 37  | 18  | 34  | 42  | 58  |
| SMMPA10321 | 24 | 18 | 26 | 20  | 13  | 22  | 29  | 35  | 31  |
| SMMPA10322 | 18 | 19 | 15 | 81  | 89  | 67  | 49  | 95  | 75  |
| SMMPA10323 | 10 | 19 | 16 | 31  | 40  | 40  | 40  | 44  | 49  |
| SMMPA10324 | 9  | 16 | 14 | 173 | 172 | 144 | 66  | 87  | 73  |
| SMMPA10325 | 43 | 37 | 37 | 128 | 131 | 90  | 109 | 125 | 131 |
| SMMPA10326 | 28 | 25 | 27 | 35  | 34  | 37  | 29  | 53  | 43  |
| SMMPA10327 | 25 | 39 | 32 | 42  | 37  | 26  | 47  | 46  | 45  |
| SMMPA10328 | 27 | 34 | 29 | 234 | 207 | 194 | 109 | 136 | 116 |
| SMMPA10329 | 65 | 65 | 47 | 286 | 243 | 210 | 139 | 202 | 187 |
| SMMPA10330 | 73 | 76 | 56 | 103 | 62  | 81  | 73  | 91  | 114 |
| SMMPA10331 | 31 | 34 | 33 | 69  | 61  | 62  | 36  | 51  | 46  |
| SMMPA10332 | 32 | 22 | 26 | 261 | 241 | 190 | 111 | 141 | 160 |
| SMMPA10333 | 6  | 10 | 12 | 20  | 34  | 22  | 25  | 17  | 35  |
| SMMPA10334 | 21 | 19 | 11 | 130 | 117 | 90  | 90  | 102 | 103 |
| SMMPA10335 | 14 | 15 | 15 | 90  | 89  | 70  | 52  | 53  | 63  |

|            |    |    |    |      |      |     |     |     |     |
|------------|----|----|----|------|------|-----|-----|-----|-----|
| SMMPA10336 | 15 | 12 | 18 | 126  | 133  | 96  | 58  | 97  | 91  |
| SMMPA10337 | 46 | 51 | 43 | 166  | 154  | 110 | 89  | 104 | 103 |
| SMMPA10338 | 13 | 10 | 10 | 91   | 63   | 78  | 41  | 81  | 60  |
| SMMPA10339 | 29 | 34 | 25 | 222  | 232  | 167 | 111 | 147 | 136 |
| SMMPA10340 | 23 | 19 | 17 | 67   | 62   | 62  | 34  | 50  | 42  |
| SMMPA10341 | 22 | 34 | 19 | 155  | 130  | 115 | 64  | 82  | 95  |
| SMMPA10342 | 21 | 18 | 24 | 108  | 112  | 84  | 61  | 76  | 84  |
| SMMPA10343 | 35 | 30 | 28 | 526  | 469  | 399 | 203 | 262 | 237 |
| SMMPA10344 | 28 | 30 | 35 | 384  | 348  | 264 | 151 | 240 | 210 |
| SMMPA10345 | 40 | 41 | 26 | 347  | 313  | 256 | 186 | 280 | 243 |
| SMMPA10346 | 29 | 28 | 35 | 388  | 332  | 258 | 137 | 175 | 140 |
| SMMPA10347 | 35 | 36 | 40 | 1182 | 1131 | 972 | 452 | 631 | 571 |
| SMMPA10348 | 18 | 26 | 22 | 447  | 409  | 390 | 193 | 209 | 228 |
| SMMPA10349 | 20 | 22 | 12 | 636  | 688  | 654 | 169 | 211 | 191 |
| SMMPA10350 | 13 | 9  | 9  | 159  | 180  | 171 | 39  | 65  | 52  |
| SMMPA10351 | 27 | 21 | 23 | 843  | 771  | 645 | 309 | 420 | 392 |
| SMMPA10352 | 2  | 8  | 9  | 278  | 288  | 316 | 129 | 160 | 161 |
| SMMPA10353 | 23 | 19 | 27 | 37   | 32   | 43  | 18  | 25  | 27  |
| SMMPA10354 | 28 | 39 | 36 | 60   | 68   | 76  | 49  | 55  | 58  |
| SMMPA10355 | 27 | 24 | 29 | 41   | 49   | 35  | 31  | 36  | 48  |
| SMMPA10356 | 36 | 27 | 20 | 47   | 58   | 43  | 34  | 44  | 37  |
| SMMPA10357 | 20 | 38 | 35 | 87   | 66   | 45  | 46  | 49  | 54  |
| SMMPA10358 | 10 | 14 | 4  | 27   | 36   | 27  | 15  | 33  | 23  |
| SMMPA10359 | 21 | 17 | 13 | 170  | 182  | 118 | 59  | 57  | 60  |
| SMMPA10360 | 12 | 19 | 18 | 59   | 59   | 46  | 29  | 36  | 31  |
| SMMPA10361 | 13 | 8  | 12 | 21   | 17   | 22  | 11  | 26  | 16  |
| SMMPA10362 | 27 | 25 | 25 | 21   | 28   | 26  | 17  | 30  | 28  |
| SMMPA10363 | 14 | 11 | 10 | 22   | 29   | 24  | 18  | 29  | 15  |
| SMMPA10364 | 13 | 11 | 12 | 46   | 34   | 22  | 34  | 36  | 31  |
| SMMPA10365 | 27 | 23 | 28 | 38   | 38   | 32  | 25  | 35  | 35  |
| SMMPA10366 | 21 | 20 | 20 | 77   | 70   | 53  | 39  | 71  | 61  |
| SMMPA10367 | 22 | 23 | 28 | 46   | 53   | 56  | 33  | 49  | 46  |
| SMMPA10368 | 18 | 13 | 22 | 46   | 50   | 47  | 27  | 50  | 32  |
| SMMPA10369 | 11 | 7  | 15 | 66   | 53   | 48  | 39  | 37  | 45  |
| SMMPA10370 | 22 | 23 | 15 | 41   | 40   | 28  | 26  | 46  | 42  |
| SMMPA10371 | 22 | 21 | 23 | 43   | 39   | 30  | 21  | 32  | 37  |
| SMMPA10372 | 14 | 15 | 11 | 22   | 6    | 20  | 12  | 15  | 17  |
| SMMPA10373 | 24 | 25 | 29 | 67   | 66   | 50  | 34  | 52  | 49  |
| SMMPA10374 | 4  | 5  | 7  | 29   | 20   | 13  | 26  | 30  | 29  |
| SMMPA10375 | 8  | 11 | 7  | 18   | 10   | 13  | 19  | 17  | 15  |
| SMMPA10376 | 8  | 4  | 3  | 10   | 7    | 4   | 9   | 10  | 14  |

|            |    |    |    |     |     |     |     |     |     |
|------------|----|----|----|-----|-----|-----|-----|-----|-----|
| SMMPA10377 | 15 | 24 | 15 | 28  | 35  | 32  | 32  | 45  | 52  |
| SMMPA10378 | 35 | 30 | 28 | 125 | 111 | 71  | 49  | 88  | 102 |
| SMMPA10379 | 22 | 26 | 18 | 109 | 102 | 88  | 64  | 88  | 91  |
| SMMPA10380 | 4  | 9  | 9  | 16  | 19  | 21  | 13  | 20  | 20  |
| SMMPA10381 | 22 | 9  | 8  | 30  | 31  | 21  | 17  | 18  | 34  |
| SMMPA10382 | 11 | 7  | 13 | 63  | 59  | 53  | 32  | 30  | 31  |
| SMMPA10383 | 8  | 11 | 4  | 31  | 30  | 23  | 12  | 32  | 13  |
| SMMPA10384 | 10 | 10 | 9  | 163 | 140 | 112 | 85  | 115 | 97  |
| SMMPA10385 | 2  | 1  | 10 | 25  | 23  | 12  | 11  | 18  | 23  |
| SMMPA10386 | 0  | 4  | 1  | 6   | 6   | 8   | 4   | 8   | 9   |
| SMMPA10387 | 11 | 6  | 13 | 65  | 62  | 45  | 29  | 46  | 29  |
| SMMPA10388 | 8  | 6  | 6  | 29  | 25  | 13  | 24  | 18  | 24  |
| SMMPA10389 | 15 | 19 | 5  | 55  | 45  | 40  | 39  | 58  | 31  |
| SMMPA10390 | 6  | 8  | 17 | 44  | 51  | 27  | 20  | 37  | 32  |
| SMMPA10391 | 23 | 19 | 28 | 216 | 183 | 166 | 73  | 107 | 96  |
| SMMPA10392 | 25 | 31 | 26 | 96  | 91  | 63  | 34  | 46  | 48  |
| SMMPA10393 | 19 | 23 | 26 | 136 | 125 | 101 | 41  | 95  | 58  |
| SMMPA10394 | 36 | 29 | 31 | 112 | 89  | 66  | 51  | 73  | 70  |
| SMMPA10395 | 8  | 5  | 8  | 43  | 47  | 34  | 23  | 15  | 18  |
| SMMPA10396 | 0  | 2  | 2  | 5   | 7   | 5   | 1   | 2   | 2   |
| SMMPA10397 | 19 | 26 | 22 | 120 | 126 | 103 | 59  | 69  | 71  |
| SMMPA10398 | 27 | 35 | 18 | 169 | 140 | 120 | 63  | 104 | 81  |
| SMMPA10399 | 12 | 16 | 7  | 41  | 36  | 43  | 13  | 13  | 16  |
| SMMPA10400 | 18 | 31 | 19 | 247 | 232 | 172 | 92  | 125 | 111 |
| SMMPA10401 | 25 | 38 | 32 | 32  | 21  | 30  | 40  | 52  | 48  |
| SMMPA10402 | 16 | 14 | 14 | 14  | 12  | 13  | 13  | 17  | 21  |
| SMMPA10403 | 29 | 35 | 31 | 41  | 26  | 32  | 32  | 32  | 32  |
| SMMPA10404 | 21 | 25 | 26 | 36  | 42  | 42  | 41  | 48  | 44  |
| SMMPA10405 | 30 | 29 | 18 | 26  | 21  | 17  | 22  | 25  | 41  |
| SMMPA10406 | 17 | 12 | 12 | 24  | 18  | 12  | 17  | 15  | 16  |
| SMMPA10407 | 27 | 36 | 24 | 27  | 28  | 22  | 40  | 38  | 41  |
| SMMPA10408 | 50 | 38 | 29 | 88  | 59  | 62  | 56  | 62  | 47  |
| SMMPA10409 | 23 | 32 | 25 | 34  | 26  | 26  | 31  | 55  | 58  |
| SMMPA10410 | 20 | 14 | 24 | 153 | 168 | 114 | 70  | 89  | 79  |
| SMMPA10411 | 13 | 21 | 20 | 105 | 95  | 74  | 59  | 60  | 73  |
| SMMPA10412 | 32 | 32 | 34 | 47  | 62  | 42  | 49  | 57  | 61  |
| SMMPA10413 | 13 | 14 | 16 | 53  | 74  | 45  | 31  | 37  | 30  |
| SMMPA10414 | 27 | 32 | 30 | 70  | 57  | 40  | 30  | 57  | 58  |
| SMMPA10415 | 13 | 20 | 12 | 240 | 228 | 196 | 105 | 136 | 115 |
| SMMPA10416 | 27 | 16 | 15 | 54  | 57  | 38  | 22  | 38  | 27  |
| SMMPA10417 | 16 | 26 | 20 | 57  | 66  | 63  | 29  | 48  | 35  |

|            |    |    |    |     |     |     |     |     |     |
|------------|----|----|----|-----|-----|-----|-----|-----|-----|
| SMMPA10418 | 4  | 7  | 5  | 10  | 7   | 7   | 6   | 8   | 10  |
| SMMPA10419 | 53 | 61 | 66 | 725 | 700 | 700 | 417 | 570 | 497 |
| SMMPA10420 | 43 | 34 | 27 | 66  | 59  | 48  | 49  | 69  | 65  |
| SMMPA10421 | 17 | 19 | 17 | 15  | 20  | 16  | 25  | 21  | 29  |
| SMMPA10422 | 10 | 7  | 13 | 9   | 13  | 16  | 12  | 17  | 8   |
| SMMPA10423 | 6  | 11 | 7  | 20  | 25  | 22  | 19  | 26  | 17  |
| SMMPA10424 | 14 | 13 | 13 | 58  | 45  | 43  | 22  | 34  | 25  |
| SMMPA10425 | 35 | 24 | 24 | 520 | 544 | 411 | 458 | 551 | 501 |
| SMMPA10426 | 5  | 6  | 6  | 16  | 13  | 8   | 10  | 6   | 6   |
| SMMPA10427 | 17 | 23 | 10 | 27  | 24  | 25  | 27  | 28  | 28  |
| SMMPA10428 | 24 | 13 | 16 | 41  | 47  | 25  | 30  | 37  | 27  |
| SMMPA10429 | 89 | 78 | 68 | 77  | 80  | 70  | 59  | 61  | 83  |
| SMMPA10430 | 14 | 14 | 20 | 52  | 36  | 23  | 23  | 42  | 33  |
| SMMPA10431 | 14 | 7  | 13 | 76  | 53  | 47  | 27  | 36  | 40  |
| SMMPA10432 | 14 | 7  | 7  | 28  | 27  | 18  | 25  | 32  | 34  |
| SMMPA10433 | 5  | 4  | 7  | 4   | 5   | 5   | 15  | 24  | 17  |
| SMMPA10434 | 23 | 23 | 18 | 36  | 45  | 28  | 38  | 60  | 52  |
| SMMPA10435 | 17 | 14 | 18 | 65  | 77  | 74  | 17  | 24  | 20  |
| SMMPA10436 | 10 | 10 | 13 | 46  | 55  | 45  | 18  | 22  | 21  |
| SMMPA10437 | 6  | 3  | 3  | 30  | 29  | 26  | 13  | 9   | 15  |
| SMMPA10438 | 5  | 9  | 4  | 17  | 12  | 12  | 14  | 12  | 11  |
| SMMPA10439 | 33 | 19 | 19 | 127 | 133 | 100 | 56  | 71  | 63  |
| SMMPA10440 | 5  | 11 | 9  | 47  | 30  | 43  | 15  | 26  | 28  |
| SMMPA10441 | 15 | 11 | 14 | 78  | 91  | 70  | 37  | 57  | 45  |
| SMMPA10442 | 9  | 9  | 8  | 52  | 50  | 37  | 25  | 33  | 38  |
| SMMPA10443 | 17 | 8  | 7  | 74  | 60  | 49  | 51  | 45  | 46  |
| SMMPA10444 | 41 | 58 | 39 | 587 | 509 | 403 | 282 | 393 | 358 |
| SMMPA10445 | 12 | 27 | 10 | 156 | 142 | 108 | 56  | 61  | 61  |
| SMMPA10446 | 28 | 26 | 21 | 69  | 75  | 52  | 37  | 41  | 36  |
| SMMPA10447 | 35 | 41 | 22 | 172 | 136 | 123 | 55  | 90  | 96  |
| SMMPA10448 | 16 | 22 | 18 | 58  | 55  | 50  | 36  | 43  | 45  |
| SMMPA10449 | 26 | 20 | 34 | 153 | 147 | 104 | 66  | 87  | 89  |
| SMMPA10450 | 14 | 16 | 19 | 35  | 43  | 37  | 20  | 35  | 29  |
| SMMPA10451 | 10 | 11 | 9  | 20  | 24  | 28  | 18  | 31  | 26  |
| SMMPA10452 | 20 | 25 | 24 | 138 | 131 | 109 | 40  | 55  | 49  |
| SMMPA10453 | 28 | 21 | 30 | 183 | 208 | 146 | 70  | 96  | 69  |
| SMMPA10454 | 17 | 11 | 12 | 50  | 63  | 56  | 27  | 39  | 31  |
| SMMPA10455 | 15 | 9  | 10 | 102 | 84  | 64  | 46  | 88  | 65  |
| SMMPA10456 | 8  | 15 | 15 | 40  | 53  | 32  | 29  | 24  | 34  |
| SMMPA10457 | 32 | 23 | 24 | 135 | 100 | 115 | 86  | 94  | 85  |
| SMMPA10458 | 13 | 14 | 21 | 82  | 80  | 68  | 26  | 38  | 39  |



|            |     |     |    |     |     |     |    |     |     |
|------------|-----|-----|----|-----|-----|-----|----|-----|-----|
| SMMPA10459 | 10  | 18  | 12 | 66  | 80  | 61  | 16 | 43  | 42  |
| SMMPA10460 | 11  | 18  | 19 | 104 | 93  | 78  | 30 | 38  | 41  |
| SMMPA10461 | 7   | 5   | 6  | 22  | 18  | 23  | 9  | 15  | 27  |
| SMMPA10462 | 31  | 26  | 21 | 108 | 117 | 85  | 55 | 79  | 68  |
| SMMPA10463 | 22  | 10  | 18 | 27  | 30  | 16  | 10 | 18  | 23  |
| SMMPA10464 | 22  | 27  | 20 | 106 | 65  | 49  | 37 | 45  | 46  |
| SMMPA10465 | 43  | 44  | 34 | 84  | 77  | 66  | 59 | 56  | 69  |
| SMMPA10466 | 29  | 27  | 31 | 173 | 147 | 123 | 73 | 85  | 86  |
| SMMPA10467 | 39  | 43  | 50 | 225 | 206 | 175 | 95 | 102 | 114 |
| SMMPA10468 | 28  | 27  | 28 | 164 | 137 | 119 | 74 | 83  | 86  |
| SMMPA10469 | 21  | 19  | 15 | 60  | 61  | 34  | 25 | 37  | 29  |
| SMMPA10470 | 27  | 22  | 17 | 105 | 84  | 80  | 54 | 77  | 82  |
| SMMPA10471 | 106 | 112 | 97 | 78  | 67  | 67  | 72 | 99  | 100 |
| SMMPA10472 | 23  | 19  | 23 | 102 | 108 | 114 | 49 | 68  | 57  |
| SMMPA10473 | 33  | 30  | 24 | 29  | 18  | 27  | 39 | 51  | 43  |
| SMMPA10474 | 29  | 32  | 35 | 76  | 56  | 45  | 70 | 88  | 55  |
| SMMPA10475 | 41  | 35  | 32 | 38  | 47  | 35  | 31 | 59  | 54  |
| SMMPA10476 | 27  | 29  | 23 | 61  | 41  | 33  | 52 | 52  | 49  |
| SMMPA10477 | 26  | 35  | 22 | 28  | 18  | 29  | 30 | 29  | 37  |
| SMMPA10478 | 12  | 11  | 16 | 26  | 22  | 20  | 19 | 39  | 31  |
| SMMPA10479 | 18  | 23  | 16 | 58  | 38  | 28  | 22 | 31  | 26  |
| SMMPA10480 | 21  | 26  | 19 | 120 | 104 | 96  | 46 | 85  | 61  |
| SMMPA10481 | 47  | 40  | 31 | 37  | 42  | 34  | 42 | 66  | 70  |
| SMMPA10482 | 32  | 18  | 27 | 29  | 38  | 32  | 35 | 42  | 23  |
| SMMPA10483 | 11  | 22  | 12 | 109 | 82  | 66  | 49 | 52  | 48  |
| SMMPA10484 | 15  | 20  | 20 | 40  | 29  | 38  | 24 | 35  | 21  |
| SMMPA10485 | 55  | 38  | 32 | 39  | 29  | 31  | 30 | 37  | 40  |
| SMMPA10486 | 17  | 27  | 21 | 32  | 37  | 30  | 32 | 39  | 30  |
| SMMPA10487 | 26  | 14  | 9  | 40  | 55  | 42  | 29 | 49  | 50  |
| SMMPA10488 | 23  | 24  | 26 | 182 | 170 | 138 | 83 | 142 | 113 |
| SMMPA10489 | 46  | 55  | 36 | 80  | 79  | 68  | 50 | 48  | 77  |
| SMMPA10490 | 13  | 30  | 18 | 75  | 63  | 60  | 36 | 40  | 50  |
| SMMPA10491 | 25  | 19  | 21 | 35  | 47  | 33  | 37 | 37  | 41  |
| SMMPA10492 | 20  | 15  | 9  | 38  | 39  | 37  | 28 | 44  | 31  |
| SMMPA10493 | 6   | 6   | 8  | 39  | 32  | 18  | 20 | 28  | 38  |
| SMMPA10494 | 18  | 33  | 17 | 265 | 211 | 190 | 89 | 157 | 122 |
| SMMPA10495 | 7   | 4   | 2  | 17  | 14  | 11  | 11 | 20  | 8   |
| SMMPA10496 | 14  | 16  | 17 | 158 | 163 | 126 | 62 | 85  | 68  |
| SMMPA10497 | 4   | 3   | 8  | 9   | 10  | 7   | 2  | 11  | 5   |
| SMMPA10498 | 18  | 14  | 12 | 57  | 42  | 35  | 30 | 46  | 38  |
| SMMPA10499 | 12  | 13  | 15 | 17  | 21  | 8   | 17 | 20  | 26  |

|            |    |    |    |     |     |     |     |     |     |
|------------|----|----|----|-----|-----|-----|-----|-----|-----|
| SMMPA10500 | 14 | 9  | 10 | 29  | 26  | 24  | 21  | 21  | 29  |
| SMMPA10501 | 32 | 35 | 24 | 93  | 83  | 46  | 53  | 61  | 49  |
| SMMPA10502 | 41 | 30 | 26 | 47  | 23  | 40  | 31  | 54  | 50  |
| SMMPA10503 | 22 | 17 | 21 | 334 | 315 | 235 | 123 | 192 | 147 |
| SMMPA10504 | 28 | 29 | 11 | 55  | 47  | 40  | 32  | 55  | 58  |
| SMMPA10505 | 16 | 29 | 19 | 122 | 124 | 71  | 37  | 67  | 57  |
| SMMPA10506 | 15 | 13 | 15 | 66  | 76  | 73  | 38  | 53  | 55  |
| SMMPA10507 | 38 | 22 | 30 | 103 | 116 | 95  | 59  | 80  | 84  |
| SMMPA10508 | 6  | 19 | 5  | 57  | 59  | 48  | 33  | 58  | 44  |
| SMMPA10509 | 13 | 12 | 14 | 26  | 16  | 22  | 27  | 31  | 33  |
| SMMPA10510 | 6  | 8  | 9  | 36  | 23  | 23  | 22  | 27  | 17  |
| SMMPA10511 | 31 | 33 | 20 | 262 | 247 | 210 | 147 | 192 | 203 |
| SMMPA10512 | 19 | 21 | 12 | 43  | 39  | 27  | 22  | 24  | 26  |
| SMMPA10513 | 3  | 14 | 13 | 23  | 35  | 17  | 13  | 15  | 12  |
| SMMPA10514 | 17 | 11 | 13 | 57  | 62  | 49  | 19  | 43  | 40  |
| SMMPA10515 | 42 | 31 | 37 | 54  | 54  | 36  | 66  | 74  | 61  |
| SMMPA10516 | 28 | 34 | 41 | 25  | 25  | 27  | 19  | 19  | 20  |
| SMMPA10517 | 13 | 8  | 14 | 63  | 61  | 52  | 43  | 55  | 51  |
| SMMPA10518 | 17 | 14 | 13 | 152 | 135 | 99  | 56  | 89  | 95  |
| SMMPA10519 | 30 | 23 | 13 | 133 | 136 | 119 | 84  | 134 | 115 |
| SMMPA10520 | 4  | 7  | 6  | 5   | 6   | 5   | 8   | 12  | 14  |
| SMMPA10521 | 21 | 21 | 26 | 39  | 42  | 15  | 22  | 41  | 26  |
| SMMPA10522 | 25 | 24 | 21 | 42  | 32  | 29  | 28  | 45  | 45  |
| SMMPA10523 | 22 | 12 | 12 | 57  | 50  | 47  | 37  | 51  | 39  |
| SMMPA10524 | 18 | 13 | 17 | 103 | 76  | 59  | 48  | 79  | 76  |
| SMMPA10525 | 27 | 34 | 27 | 234 | 174 | 147 | 97  | 131 | 117 |
| SMMPA10526 | 25 | 41 | 28 | 135 | 126 | 98  | 67  | 77  | 92  |
| SMMPA10527 | 11 | 10 | 7  | 42  | 28  | 29  | 19  | 24  | 16  |
| SMMPA10528 | 17 | 11 | 12 | 18  | 18  | 21  | 25  | 39  | 26  |
| SMMPA10529 | 17 | 10 | 23 | 51  | 44  | 47  | 33  | 33  | 38  |
| SMMPA10530 | 85 | 98 | 90 | 171 | 149 | 146 | 114 | 183 | 146 |
| SMMPA10531 | 23 | 24 | 28 | 67  | 67  | 71  | 42  | 29  | 33  |
| SMMPA10532 | 36 | 35 | 28 | 71  | 58  | 53  | 56  | 71  | 48  |
| SMMPA10533 | 25 | 26 | 19 | 80  | 50  | 70  | 47  | 63  | 53  |
| SMMPA10534 | 11 | 6  | 9  | 56  | 54  | 36  | 29  | 32  | 35  |
| SMMPA10535 | 41 | 42 | 36 | 343 | 333 | 313 | 141 | 176 | 135 |
| SMMPA10536 | 26 | 24 | 21 | 62  | 52  | 61  | 35  | 63  | 52  |
| SMMPA10537 | 18 | 26 | 26 | 58  | 54  | 46  | 37  | 56  | 35  |
| SMMPA10538 | 11 | 7  | 25 | 46  | 26  | 22  | 18  | 40  | 41  |
| SMMPA10539 | 17 | 25 | 21 | 306 | 239 | 196 | 90  | 143 | 123 |
| SMMPA10540 | 17 | 10 | 17 | 69  | 64  | 58  | 42  | 50  | 39  |

|            |    |    |    |     |     |     |     |     |     |
|------------|----|----|----|-----|-----|-----|-----|-----|-----|
| SMMPA10541 | 29 | 30 | 17 | 35  | 43  | 34  | 29  | 39  | 43  |
| SMMPA10542 | 27 | 30 | 15 | 43  | 41  | 43  | 34  | 46  | 42  |
| SMMPA10543 | 36 | 28 | 24 | 57  | 48  | 35  | 29  | 41  | 37  |
| SMMPA10544 | 29 | 34 | 35 | 72  | 50  | 46  | 36  | 56  | 53  |
| SMMPA10545 | 13 | 12 | 17 | 164 | 151 | 124 | 66  | 120 | 98  |
| SMMPA10546 | 11 | 16 | 9  | 157 | 131 | 116 | 78  | 120 | 90  |
| SMMPA10547 | 12 | 11 | 14 | 188 | 139 | 86  | 92  | 132 | 128 |
| SMMPA10548 | 9  | 15 | 20 | 82  | 68  | 58  | 47  | 63  | 59  |
| SMMPA10549 | 10 | 11 | 17 | 52  | 46  | 23  | 33  | 49  | 26  |
| SMMPA10550 | 32 | 27 | 37 | 201 | 162 | 122 | 73  | 104 | 119 |
| SMMPA10551 | 26 | 30 | 27 | 307 | 274 | 216 | 126 | 186 | 138 |
| SMMPA10552 | 27 | 21 | 20 | 122 | 121 | 77  | 49  | 86  | 77  |
| SMMPA10553 | 18 | 15 | 13 | 110 | 91  | 77  | 34  | 62  | 64  |
| SMMPA10554 | 18 | 18 | 18 | 234 | 223 | 194 | 58  | 123 | 91  |
| SMMPA10555 | 10 | 6  | 10 | 119 | 149 | 139 | 28  | 57  | 40  |
| SMMPA10556 | 33 | 28 | 33 | 74  | 77  | 50  | 34  | 51  | 37  |
| SMMPA10557 | 26 | 22 | 18 | 57  | 43  | 43  | 52  | 40  | 40  |
| SMMPA10558 | 21 | 16 | 19 | 170 | 127 | 135 | 45  | 73  | 62  |
| SMMPA10559 | 20 | 24 | 19 | 142 | 121 | 79  | 52  | 62  | 71  |
| SMMPA10560 | 1  | 5  | 3  | 33  | 35  | 24  | 21  | 22  | 11  |
| SMMPA10561 | 11 | 21 | 12 | 49  | 47  | 46  | 24  | 37  | 35  |
| SMMPA10562 | 19 | 18 | 19 | 203 | 179 | 124 | 61  | 94  | 81  |
| SMMPA10563 | 17 | 14 | 19 | 144 | 154 | 120 | 69  | 63  | 70  |
| SMMPA10564 | 33 | 18 | 20 | 261 | 237 | 190 | 92  | 139 | 132 |
| SMMPA10565 | 7  | 14 | 15 | 105 | 109 | 82  | 56  | 70  | 64  |
| SMMPA10566 | 14 | 19 | 25 | 267 | 290 | 249 | 101 | 144 | 132 |
| SMMPA10567 | 9  | 9  | 4  | 6   | 12  | 10  | 9   | 12  | 10  |
| SMMPA10568 | 15 | 23 | 22 | 27  | 25  | 21  | 30  | 30  | 26  |
| SMMPA10569 | 32 | 22 | 13 | 36  | 29  | 38  | 27  | 43  | 27  |
| SMMPA10570 | 25 | 36 | 26 | 120 | 84  | 71  | 82  | 98  | 90  |
| SMMPA10571 | 4  | 2  | 5  | 7   | 6   | 2   | 6   | 10  | 8   |
| SMMPA10572 | 16 | 11 | 11 | 14  | 8   | 9   | 30  | 27  | 39  |
| SMMPA10573 | 27 | 34 | 34 | 119 | 122 | 93  | 83  | 125 | 93  |
| SMMPA10574 | 10 | 8  | 10 | 50  | 46  | 25  | 21  | 28  | 30  |
| SMMPA10575 | 17 | 20 | 12 | 98  | 101 | 81  | 42  | 65  | 52  |
| SMMPA10576 | 19 | 18 | 17 | 124 | 110 | 105 | 35  | 43  | 47  |
| SMMPA10577 | 15 | 13 | 11 | 79  | 75  | 54  | 68  | 62  | 61  |
| SMMPA10578 | 10 | 15 | 14 | 104 | 88  | 73  | 55  | 75  | 66  |
| SMMPA10579 | 14 | 16 | 9  | 49  | 47  | 41  | 30  | 39  | 31  |
| SMMPA10580 | 15 | 18 | 11 | 35  | 16  | 22  | 23  | 22  | 24  |
| SMMPA10581 | 12 | 13 | 13 | 74  | 80  | 51  | 24  | 43  | 35  |

|            |    |    |    |     |     |     |     |     |     |
|------------|----|----|----|-----|-----|-----|-----|-----|-----|
| SMMPA10582 | 10 | 13 | 14 | 59  | 53  | 32  | 24  | 33  | 36  |
| SMMPA10583 | 5  | 8  | 3  | 18  | 13  | 11  | 9   | 7   | 10  |
| SMMPA10584 | 14 | 18 | 23 | 62  | 50  | 43  | 39  | 42  | 40  |
| SMMPA10585 | 41 | 51 | 45 | 109 | 89  | 73  | 55  | 99  | 87  |
| SMMPA10586 | 23 | 26 | 31 | 334 | 333 | 267 | 171 | 206 | 193 |
| SMMPA10587 | 13 | 12 | 20 | 120 | 139 | 111 | 64  | 90  | 62  |
| SMMPA10588 | 29 | 29 | 26 | 143 | 132 | 116 | 66  | 97  | 96  |
| SMMPA10589 | 17 | 21 | 18 | 105 | 106 | 78  | 47  | 71  | 63  |
| SMMPA10590 | 11 | 22 | 22 | 280 | 275 | 240 | 88  | 126 | 119 |
| SMMPA10591 | 7  | 9  | 4  | 56  | 66  | 45  | 19  | 30  | 28  |
| SMMPA10592 | 13 | 15 | 18 | 79  | 62  | 41  | 28  | 51  | 57  |
| SMMPA10593 | 8  | 17 | 14 | 50  | 37  | 37  | 31  | 47  | 43  |
| SMMPA10594 | 22 | 16 | 20 | 54  | 50  | 45  | 24  | 37  | 41  |
| SMMPA10595 | 33 | 18 | 19 | 55  | 48  | 46  | 30  | 44  | 27  |
| SMMPA10596 | 9  | 17 | 13 | 38  | 38  | 39  | 28  | 50  | 37  |
| SMMPA10597 | 14 | 17 | 16 | 40  | 31  | 24  | 18  | 29  | 27  |
| SMMPA10598 | 7  | 4  | 3  | 13  | 12  | 9   | 5   | 9   | 16  |
| SMMPA10599 | 14 | 16 | 20 | 48  | 35  | 31  | 28  | 30  | 43  |
| SMMPA10600 | 22 | 14 | 14 | 83  | 67  | 36  | 32  | 48  | 44  |
| SMMPA10601 | 15 | 18 | 15 | 16  | 31  | 9   | 25  | 25  | 23  |
| SMMPA10602 | 9  | 18 | 11 | 25  | 16  | 26  | 25  | 27  | 33  |
| SMMPA10603 | 26 | 28 | 30 | 51  | 57  | 34  | 50  | 51  | 61  |
| SMMPA10604 | 12 | 12 | 12 | 20  | 23  | 17  | 10  | 16  | 17  |
| SMMPA10605 | 58 | 79 | 74 | 77  | 66  | 54  | 73  | 96  | 99  |
| SMMPA10606 | 94 | 97 | 94 | 67  | 100 | 73  | 63  | 99  | 112 |
| SMMPA10607 | 28 | 25 | 30 | 34  | 34  | 37  | 33  | 42  | 49  |
| SMMPA10608 | 52 | 32 | 32 | 31  | 27  | 16  | 35  | 55  | 56  |
| SMMPA10609 | 24 | 20 | 19 | 43  | 44  | 28  | 32  | 49  | 36  |
| SMMPA10610 | 9  | 16 | 12 | 85  | 52  | 50  | 50  | 58  | 57  |
| SMMPA10611 | 25 | 20 | 14 | 105 | 81  | 68  | 44  | 53  | 56  |
| SMMPA10612 | 15 | 22 | 10 | 31  | 23  | 24  | 26  | 25  | 29  |
| SMMPA10613 | 31 | 15 | 27 | 18  | 20  | 14  | 32  | 30  | 29  |
| SMMPA10614 | 16 | 27 | 23 | 34  | 25  | 22  | 27  | 25  | 28  |
| SMMPA10615 | 8  | 18 | 7  | 46  | 36  | 35  | 23  | 50  | 49  |
| SMMPA10616 | 45 | 53 | 38 | 60  | 62  | 37  | 49  | 64  | 65  |
| SMMPA10617 | 22 | 20 | 20 | 24  | 17  | 22  | 14  | 35  | 18  |
| SMMPA10618 | 20 | 23 | 27 | 148 | 146 | 99  | 96  | 123 | 102 |
| SMMPA10619 | 13 | 25 | 26 | 27  | 33  | 30  | 31  | 39  | 31  |
| SMMPA10620 | 37 | 30 | 40 | 23  | 44  | 35  | 35  | 46  | 44  |
| SMMPA10621 | 31 | 38 | 21 | 54  | 38  | 26  | 24  | 42  | 34  |
| SMMPA10622 | 39 | 25 | 16 | 124 | 137 | 109 | 50  | 60  | 44  |

|            |    |    |    |     |     |     |     |     |     |
|------------|----|----|----|-----|-----|-----|-----|-----|-----|
| SMMPA10623 | 10 | 12 | 10 | 282 | 252 | 209 | 123 | 131 | 149 |
| SMMPA10624 | 28 | 49 | 35 | 152 | 149 | 130 | 91  | 91  | 106 |
| SMMPA10625 | 17 | 20 | 17 | 72  | 80  | 48  | 32  | 47  | 44  |
| SMMPA10626 | 27 | 27 | 21 | 76  | 70  | 63  | 38  | 52  | 49  |
| SMMPA10627 | 31 | 20 | 17 | 750 | 745 | 661 | 367 | 471 | 427 |
| SMMPA10628 | 26 | 29 | 22 | 43  | 27  | 42  | 36  | 33  | 62  |
| SMMPA10629 | 30 | 47 | 32 | 86  | 68  | 70  | 69  | 93  | 88  |
| SMMPA10630 | 29 | 15 | 19 | 79  | 65  | 55  | 50  | 59  | 68  |
| SMMPA10631 | 52 | 47 | 44 | 223 | 148 | 143 | 140 | 220 | 192 |
| SMMPA10632 | 38 | 46 | 44 | 119 | 92  | 82  | 80  | 104 | 91  |
| SMMPA10633 | 7  | 15 | 10 | 5   | 7   | 13  | 5   | 15  | 20  |
| SMMPA10634 | 49 | 55 | 39 | 54  | 49  | 53  | 48  | 49  | 70  |
| SMMPA10635 | 34 | 30 | 35 | 244 | 213 | 208 | 142 | 187 | 163 |
| SMMPA10636 | 43 | 34 | 32 | 36  | 41  | 34  | 25  | 44  | 47  |
| SMMPA10637 | 30 | 47 | 26 | 37  | 50  | 42  | 36  | 44  | 49  |
| SMMPA10638 | 28 | 56 | 40 | 575 | 532 | 449 | 247 | 326 | 330 |
| SMMPA10639 | 69 | 75 | 68 | 87  | 75  | 70  | 81  | 88  | 62  |
| SMMPA10640 | 42 | 36 | 21 | 76  | 62  | 70  | 54  | 64  | 67  |
| SMMPA10641 | 59 | 97 | 64 | 63  | 73  | 80  | 89  | 115 | 117 |
| SMMPA10642 | 40 | 51 | 46 | 144 | 134 | 104 | 100 | 147 | 132 |
| SMMPA10643 | 26 | 32 | 36 | 201 | 193 | 137 | 91  | 127 | 119 |
| SMMPA10644 | 17 | 39 | 23 | 71  | 63  | 48  | 39  | 48  | 48  |
| SMMPA10645 | 26 | 27 | 28 | 191 | 183 | 114 | 78  | 131 | 95  |
| SMMPA10646 | 42 | 36 | 20 | 369 | 364 | 278 | 168 | 221 | 185 |
| SMMPA10647 | 19 | 27 | 20 | 149 | 145 | 117 | 96  | 115 | 103 |
| SMMPA10648 | 36 | 22 | 15 | 50  | 51  | 29  | 41  | 59  | 55  |
| SMMPA10649 | 20 | 30 | 16 | 217 | 170 | 135 | 98  | 176 | 139 |
| SMMPA10650 | 11 | 18 | 8  | 95  | 63  | 54  | 38  | 48  | 43  |
| SMMPA10651 | 32 | 31 | 44 | 168 | 131 | 98  | 73  | 110 | 121 |
| SMMPA10652 | 18 | 22 | 21 | 68  | 63  | 42  | 44  | 56  | 71  |
| SMMPA10653 | 9  | 17 | 13 | 29  | 49  | 34  | 32  | 52  | 44  |
| SMMPA10654 | 10 | 18 | 20 | 136 | 121 | 96  | 41  | 51  | 49  |
| SMMPA10655 | 18 | 23 | 24 | 79  | 69  | 73  | 50  | 60  | 42  |
| SMMPA10656 | 10 | 17 | 15 | 63  | 58  | 36  | 26  | 52  | 43  |
| SMMPA10657 | 34 | 27 | 25 | 100 | 91  | 74  | 39  | 56  | 47  |
| SMMPA10658 | 12 | 9  | 11 | 46  | 36  | 30  | 28  | 28  | 31  |
| SMMPA10659 | 22 | 31 | 28 | 115 | 99  | 75  | 56  | 54  | 75  |
| SMMPA10660 | 23 | 21 | 26 | 228 | 188 | 179 | 72  | 146 | 97  |
| SMMPA10661 | 26 | 33 | 18 | 132 | 102 | 86  | 57  | 83  | 81  |
| SMMPA10662 | 20 | 12 | 16 | 40  | 35  | 31  | 20  | 22  | 22  |
| SMMPA10663 | 30 | 33 | 31 | 162 | 171 | 129 | 68  | 75  | 71  |

|            |    |    |    |     |     |     |     |     |     |
|------------|----|----|----|-----|-----|-----|-----|-----|-----|
| SMMPA10664 | 7  | 5  | 6  | 27  | 38  | 33  | 8   | 25  | 16  |
| SMMPA10665 | 29 | 25 | 20 | 441 | 437 | 408 | 193 | 319 | 290 |
| SMMPA10666 | 21 | 26 | 28 | 67  | 55  | 48  | 35  | 34  | 33  |
| SMMPA10667 | 19 | 21 | 11 | 130 | 110 | 103 | 64  | 98  | 92  |
| SMMPA10668 | 17 | 15 | 10 | 90  | 57  | 64  | 52  | 72  | 71  |
| SMMPA10669 | 17 | 25 | 27 | 93  | 78  | 61  | 57  | 83  | 77  |
| SMMPA10670 | 10 | 11 | 13 | 87  | 69  | 76  | 50  | 43  | 42  |
| SMMPA10671 | 15 | 18 | 23 | 107 | 89  | 82  | 61  | 67  | 47  |
| SMMPA10672 | 11 | 9  | 11 | 41  | 39  | 34  | 23  | 37  | 20  |
| SMMPA10673 | 29 | 29 | 29 | 107 | 103 | 71  | 45  | 71  | 49  |
| SMMPA10674 | 22 | 18 | 23 | 131 | 109 | 94  | 56  | 57  | 57  |
| SMMPA10675 | 27 | 34 | 24 | 30  | 28  | 40  | 45  | 45  | 44  |
| SMMPA10676 | 15 | 19 | 24 | 838 | 732 | 679 | 303 | 380 | 351 |
| SMMPA10677 | 2  | 1  | 4  | 2   | 7   | 7   | 4   | 4   | 6   |
| SMMPA10678 | 17 | 32 | 23 | 38  | 31  | 31  | 33  | 40  | 39  |
| SMMPA10679 | 18 | 20 | 15 | 44  | 34  | 25  | 25  | 42  | 38  |
| SMMPA10680 | 17 | 14 | 15 | 19  | 19  | 13  | 14  | 23  | 25  |
| SMMPA10681 | 26 | 23 | 22 | 34  | 35  | 43  | 50  | 48  | 39  |
| SMMPA10682 | 6  | 3  | 2  | 17  | 21  | 13  | 12  | 19  | 18  |
| SMMPA10683 | 13 | 7  | 8  | 12  | 15  | 9   | 23  | 22  | 27  |
| SMMPA10684 | 40 | 44 | 53 | 125 | 127 | 92  | 81  | 114 | 94  |
| SMMPA10685 | 24 | 17 | 20 | 101 | 80  | 61  | 42  | 62  | 49  |
| SMMPA10686 | 32 | 30 | 25 | 67  | 47  | 30  | 39  | 47  | 38  |
| SMMPA10687 | 17 | 25 | 13 | 24  | 27  | 16  | 23  | 30  | 40  |
| SMMPA10688 | 36 | 34 | 21 | 47  | 41  | 33  | 40  | 52  | 50  |
| SMMPA10689 | 26 | 35 | 30 | 94  | 92  | 67  | 35  | 59  | 58  |
| SMMPA10690 | 36 | 42 | 47 | 82  | 77  | 55  | 47  | 74  | 62  |
| SMMPA10691 | 10 | 20 | 19 | 24  | 25  | 28  | 24  | 30  | 17  |
| SMMPA10692 | 21 | 27 | 15 | 211 | 183 | 102 | 103 | 123 | 123 |
| SMMPA10693 | 29 | 31 | 30 | 68  | 56  | 36  | 44  | 68  | 39  |
| SMMPA10694 | 26 | 32 | 28 | 75  | 69  | 47  | 51  | 62  | 76  |
| SMMPA10695 | 21 | 23 | 13 | 184 | 158 | 129 | 81  | 126 | 107 |
| SMMPA10696 | 13 | 16 | 20 | 31  | 28  | 22  | 29  | 35  | 37  |
| SMMPA10697 | 22 | 14 | 9  | 25  | 18  | 20  | 19  | 29  | 29  |
| SMMPA10698 | 17 | 11 | 8  | 7   | 8   | 15  | 13  | 9   | 11  |
| SMMPA10699 | 31 | 27 | 17 | 42  | 50  | 37  | 31  | 34  | 41  |
| SMMPA10700 | 14 | 20 | 13 | 11  | 16  | 7   | 11  | 20  | 19  |
| SMMPA10701 | 5  | 6  | 4  | 145 | 109 | 108 | 68  | 74  | 70  |
| SMMPA10702 | 23 | 24 | 14 | 127 | 124 | 84  | 47  | 53  | 56  |
| SMMPA10703 | 23 | 17 | 11 | 40  | 55  | 31  | 18  | 42  | 27  |
| SMMPA10704 | 25 | 23 | 18 | 48  | 57  | 41  | 24  | 39  | 30  |

|            |    |    |    |     |     |     |     |     |     |
|------------|----|----|----|-----|-----|-----|-----|-----|-----|
| SMMPA10705 | 28 | 27 | 23 | 106 | 97  | 83  | 40  | 43  | 55  |
| SMMPA10706 | 4  | 5  | 6  | 5   | 10  | 6   | 3   | 5   | 6   |
| SMMPA10707 | 19 | 23 | 11 | 59  | 64  | 43  | 33  | 35  | 35  |
| SMMPA10708 | 18 | 25 | 16 | 76  | 65  | 53  | 33  | 53  | 41  |
| SMMPA10709 | 27 | 18 | 23 | 71  | 54  | 47  | 36  | 55  | 55  |
| SMMPA10710 | 26 | 23 | 23 | 126 | 110 | 98  | 59  | 87  | 82  |
| SMMPA10711 | 11 | 5  | 8  | 45  | 47  | 26  | 24  | 36  | 20  |
| SMMPA10712 | 20 | 26 | 19 | 287 | 252 | 171 | 144 | 151 | 122 |
| SMMPA10713 | 28 | 27 | 19 | 196 | 159 | 126 | 76  | 105 | 99  |
| SMMPA10714 | 19 | 24 | 13 | 380 | 382 | 259 | 112 | 148 | 132 |
| SMMPA10715 | 5  | 6  | 2  | 63  | 53  | 49  | 20  | 25  | 24  |
| SMMPA10716 | 12 | 7  | 12 | 108 | 82  | 72  | 44  | 52  | 55  |
| SMMPA10717 | 16 | 11 | 17 | 136 | 117 | 94  | 37  | 48  | 41  |
| SMMPA10718 | 8  | 11 | 7  | 142 | 126 | 93  | 49  | 57  | 52  |
| SMMPA10719 | 13 | 13 | 16 | 155 | 152 | 114 | 66  | 98  | 81  |
| SMMPA10720 | 30 | 46 | 25 | 562 | 468 | 376 | 181 | 248 | 233 |
| SMMPA10721 | 3  | 2  | 3  | 7   | 9   | 7   | 9   | 11  | 10  |
| SMMPA10722 | 19 | 24 | 23 | 39  | 32  | 32  | 31  | 33  | 44  |
| SMMPA10723 | 17 | 18 | 23 | 41  | 35  | 41  | 22  | 42  | 34  |
| SMMPA10724 | 24 | 20 | 19 | 104 | 74  | 78  | 73  | 83  | 93  |
| SMMPA10725 | 27 | 25 | 17 | 84  | 89  | 68  | 42  | 70  | 61  |
| SMMPA10726 | 39 | 28 | 31 | 23  | 20  | 21  | 35  | 43  | 53  |
| SMMPA10727 | 17 | 33 | 28 | 67  | 66  | 52  | 47  | 72  | 54  |
| SMMPA10728 | 20 | 20 | 17 | 92  | 68  | 67  | 57  | 94  | 80  |
| SMMPA10729 | 33 | 26 | 21 | 38  | 43  | 34  | 40  | 46  | 42  |
| SMMPA10730 | 36 | 35 | 29 | 108 | 104 | 67  | 49  | 76  | 75  |
| SMMPA10731 | 12 | 9  | 12 | 65  | 51  | 34  | 35  | 63  | 58  |
| SMMPA10732 | 27 | 27 | 19 | 73  | 73  | 53  | 43  | 63  | 55  |
| SMMPA10733 | 17 | 13 | 12 | 28  | 27  | 34  | 42  | 54  | 47  |
| SMMPA10734 | 13 | 19 | 12 | 46  | 59  | 56  | 40  | 65  | 53  |
| SMMPA10735 | 40 | 34 | 29 | 66  | 63  | 51  | 37  | 36  | 48  |
| SMMPA10736 | 37 | 39 | 32 | 73  | 73  | 60  | 51  | 62  | 60  |
| SMMPA10737 | 26 | 30 | 33 | 80  | 60  | 74  | 53  | 62  | 47  |
| SMMPA10738 | 16 | 33 | 22 | 44  | 31  | 42  | 31  | 46  | 54  |
| SMMPA10739 | 16 | 17 | 16 | 47  | 39  | 34  | 38  | 56  | 47  |
| SMMPA10740 | 19 | 18 | 18 | 170 | 130 | 130 | 114 | 140 | 115 |
| SMMPA10741 | 14 | 13 | 13 | 57  | 74  | 36  | 38  | 49  | 50  |
| SMMPA10742 | 18 | 15 | 16 | 31  | 33  | 27  | 34  | 24  | 26  |
| SMMPA10743 | 8  | 17 | 10 | 18  | 13  | 12  | 18  | 22  | 22  |
| SMMPA10744 | 19 | 16 | 13 | 16  | 21  | 15  | 12  | 17  | 27  |
| SMMPA10745 | 11 | 21 | 11 | 20  | 17  | 21  | 20  | 29  | 33  |

|            |    |    |    |     |     |     |     |     |     |
|------------|----|----|----|-----|-----|-----|-----|-----|-----|
| SMMPA10746 | 64 | 81 | 69 | 82  | 66  | 89  | 99  | 94  | 101 |
| SMMPA10747 | 11 | 8  | 15 | 9   | 11  | 13  | 25  | 24  | 23  |
| SMMPA10748 | 48 | 56 | 42 | 291 | 253 | 194 | 127 | 162 | 149 |
| SMMPA10749 | 34 | 34 | 27 | 205 | 172 | 134 | 83  | 108 | 105 |
| SMMPA10750 | 25 | 24 | 27 | 79  | 83  | 75  | 44  | 64  | 73  |
| SMMPA10751 | 20 | 36 | 26 | 290 | 279 | 212 | 169 | 245 | 225 |
| SMMPA10752 | 20 | 24 | 15 | 454 | 382 | 276 | 222 | 269 | 240 |
| SMMPA10753 | 7  | 10 | 12 | 157 | 112 | 84  | 74  | 93  | 91  |
| SMMPA10754 | 8  | 14 | 8  | 12  | 4   | 5   | 12  | 7   | 15  |
| SMMPA10755 | 26 | 9  | 17 | 29  | 17  | 28  | 21  | 27  | 24  |
| SMMPA10756 | 25 | 16 | 12 | 61  | 71  | 42  | 54  | 58  | 56  |
| SMMPA10757 | 21 | 29 | 20 | 28  | 27  | 26  | 28  | 27  | 34  |
| SMMPA10758 | 19 | 20 | 21 | 31  | 42  | 33  | 29  | 47  | 31  |
| SMMPA10759 | 20 | 16 | 26 | 37  | 46  | 29  | 24  | 31  | 25  |
| SMMPA10760 | 26 | 27 | 41 | 40  | 38  | 37  | 26  | 58  | 51  |
| SMMPA10761 | 28 | 47 | 35 | 73  | 49  | 45  | 44  | 46  | 54  |
| SMMPA10762 | 17 | 16 | 18 | 30  | 28  | 29  | 26  | 36  | 26  |
| SMMPA10763 | 20 | 23 | 15 | 44  | 36  | 28  | 23  | 26  | 27  |
| SMMPA10764 | 23 | 31 | 25 | 101 | 101 | 79  | 50  | 69  | 65  |
| SMMPA10765 | 15 | 28 | 16 | 90  | 93  | 59  | 58  | 71  | 65  |
| SMMPA10766 | 17 | 26 | 13 | 69  | 50  | 37  | 46  | 58  | 52  |
| SMMPA10767 | 10 | 23 | 18 | 144 | 150 | 104 | 83  | 97  | 87  |
| SMMPA10768 | 22 | 26 | 26 | 57  | 46  | 48  | 35  | 29  | 39  |
| SMMPA10769 | 27 | 24 | 25 | 54  | 38  | 46  | 42  | 38  | 49  |
| SMMPA10770 | 34 | 40 | 29 | 69  | 53  | 71  | 27  | 39  | 48  |
| SMMPA10771 | 26 | 20 | 17 | 67  | 58  | 51  | 41  | 56  | 68  |
| SMMPA10772 | 24 | 23 | 18 | 28  | 22  | 25  | 21  | 28  | 20  |
| SMMPA10773 | 14 | 11 | 10 | 6   | 11  | 14  | 13  | 20  | 16  |
| SMMPA10774 | 16 | 13 | 15 | 17  | 22  | 19  | 24  | 23  | 27  |
| SMMPA10775 | 20 | 20 | 18 | 38  | 24  | 36  | 26  | 33  | 32  |
| SMMPA10776 | 36 | 26 | 15 | 103 | 105 | 102 | 49  | 71  | 55  |
| SMMPA10777 | 21 | 23 | 25 | 42  | 36  | 34  | 54  | 47  | 44  |
| SMMPA10778 | 20 | 29 | 18 | 112 | 99  | 65  | 48  | 70  | 62  |
| SMMPA10779 | 13 | 12 | 14 | 81  | 61  | 51  | 41  | 38  | 56  |
| SMMPA10780 | 27 | 29 | 28 | 244 | 235 | 160 | 73  | 126 | 102 |
| SMMPA10781 | 6  | 10 | 12 | 42  | 47  | 35  | 25  | 30  | 19  |
| SMMPA10782 | 25 | 15 | 15 | 286 | 224 | 211 | 133 | 178 | 182 |
| SMMPA10783 | 24 | 25 | 20 | 80  | 68  | 70  | 45  | 50  | 73  |
| SMMPA10784 | 2  | 3  | 4  | 53  | 60  | 42  | 33  | 37  | 28  |
| SMMPA10785 | 13 | 8  | 16 | 253 | 237 | 194 | 129 | 158 | 151 |
| SMMPA10786 | 12 | 9  | 6  | 11  | 13  | 11  | 8   | 18  | 18  |



|            |    |    |    |     |     |     |     |     |     |
|------------|----|----|----|-----|-----|-----|-----|-----|-----|
| SMMPA10787 | 8  | 12 | 18 | 21  | 13  | 10  | 19  | 27  | 25  |
| SMMPA10788 | 22 | 23 | 16 | 38  | 24  | 26  | 29  | 44  | 37  |
| SMMPA10789 | 16 | 13 | 16 | 19  | 15  | 18  | 23  | 28  | 26  |
| SMMPA10790 | 22 | 24 | 15 | 33  | 38  | 26  | 33  | 37  | 54  |
| SMMPA10791 | 7  | 12 | 9  | 21  | 37  | 40  | 14  | 9   | 14  |
| SMMPA10792 | 13 | 11 | 13 | 39  | 27  | 22  | 28  | 32  | 32  |
| SMMPA10793 | 20 | 15 | 16 | 46  | 38  | 36  | 25  | 43  | 41  |
| SMMPA10794 | 6  | 6  | 5  | 24  | 20  | 17  | 17  | 26  | 27  |
| SMMPA10795 | 9  | 4  | 2  | 12  | 8   | 7   | 15  | 9   | 10  |
| SMMPA10796 | 16 | 21 | 14 | 184 | 168 | 138 | 82  | 107 | 97  |
| SMMPA10797 | 21 | 16 | 9  | 14  | 27  | 20  | 17  | 19  | 26  |
| SMMPA10798 | 11 | 7  | 12 | 34  | 30  | 21  | 19  | 21  | 22  |
| SMMPA10799 | 17 | 10 | 10 | 21  | 35  | 28  | 15  | 10  | 12  |
| SMMPA10800 | 9  | 19 | 10 | 152 | 139 | 100 | 50  | 51  | 61  |
| SMMPA10801 | 30 | 35 | 33 | 106 | 99  | 75  | 64  | 102 | 92  |
| SMMPA10802 | 20 | 23 | 15 | 95  | 83  | 63  | 40  | 51  | 47  |
| SMMPA10803 | 7  | 12 | 15 | 260 | 209 | 168 | 97  | 143 | 121 |
| SMMPA10804 | 24 | 32 | 26 | 171 | 153 | 120 | 77  | 104 | 77  |
| SMMPA10805 | 20 | 24 | 24 | 177 | 168 | 154 | 84  | 124 | 91  |
| SMMPA10806 | 28 | 17 | 15 | 112 | 123 | 108 | 64  | 74  | 84  |
| SMMPA10807 | 34 | 31 | 17 | 66  | 61  | 52  | 39  | 53  | 54  |
| SMMPA10808 | 21 | 14 | 15 | 23  | 29  | 19  | 14  | 19  | 23  |
| SMMPA10809 | 1  | 4  | 1  | 4   | 0   | 2   | 3   | 4   | 4   |
| SMMPA10810 | 16 | 17 | 16 | 16  | 14  | 19  | 16  | 20  | 21  |
| SMMPA10811 | 8  | 12 | 9  | 10  | 9   | 10  | 14  | 24  | 21  |
| SMMPA10812 | 2  | 7  | 4  | 1   | 1   | 4   | 3   | 4   | 1   |
| SMMPA10813 | 5  | 7  | 9  | 6   | 11  | 8   | 7   | 12  | 10  |
| SMMPA10814 | 36 | 32 | 26 | 424 | 353 | 302 | 194 | 221 | 193 |
| SMMPA10815 | 18 | 14 | 13 | 181 | 197 | 169 | 93  | 127 | 104 |
| SMMPA10816 | 18 | 29 | 31 | 292 | 251 | 174 | 107 | 152 | 146 |
| SMMPA10817 | 22 | 21 | 22 | 278 | 244 | 197 | 131 | 173 | 145 |
| SMMPA10818 | 55 | 57 | 56 | 211 | 202 | 163 | 129 | 178 | 197 |
| SMMPA10819 | 1  | 1  | 2  | 35  | 34  | 19  | 17  | 24  | 28  |
| SMMPA10820 | 12 | 3  | 8  | 179 | 138 | 136 | 70  | 83  | 94  |
| SMMPA10821 | 30 | 37 | 35 | 244 | 214 | 174 | 101 | 138 | 143 |
| SMMPA10822 | 36 | 29 | 35 | 238 | 250 | 170 | 100 | 142 | 114 |
| SMMPA10823 | 31 | 40 | 30 | 77  | 82  | 48  | 27  | 46  | 50  |
| SMMPA10824 | 17 | 17 | 20 | 526 | 485 | 361 | 223 | 363 | 320 |
| SMMPA10825 | 22 | 18 | 25 | 436 | 457 | 303 | 189 | 287 | 259 |
| SMMPA10826 | 19 | 9  | 15 | 32  | 35  | 35  | 21  | 14  | 21  |
| SMMPA10827 | 26 | 36 | 30 | 52  | 45  | 50  | 35  | 48  | 41  |

|            |    |    |    |     |     |     |     |     |     |
|------------|----|----|----|-----|-----|-----|-----|-----|-----|
| SMMPA10828 | 12 | 13 | 17 | 43  | 40  | 35  | 17  | 17  | 31  |
| SMMPA10829 | 19 | 15 | 10 | 26  | 25  | 21  | 20  | 23  | 29  |
| SMMPA10830 | 12 | 11 | 13 | 36  | 30  | 30  | 20  | 28  | 17  |
| SMMPA10831 | 44 | 43 | 30 | 41  | 29  | 33  | 40  | 53  | 51  |
| SMMPA10832 | 16 | 19 | 14 | 38  | 39  | 23  | 23  | 31  | 33  |
| SMMPA10833 | 22 | 28 | 28 | 84  | 65  | 52  | 47  | 76  | 74  |
| SMMPA10834 | 22 | 29 | 27 | 60  | 64  | 52  | 53  | 68  | 93  |
| SMMPA10835 | 10 | 15 | 17 | 56  | 62  | 47  | 36  | 50  | 41  |
| SMMPA10836 | 17 | 13 | 13 | 35  | 36  | 40  | 33  | 28  | 36  |
| SMMPA10837 | 25 | 24 | 10 | 51  | 49  | 46  | 24  | 30  | 28  |
| SMMPA10838 | 9  | 12 | 13 | 27  | 14  | 20  | 13  | 27  | 29  |
| SMMPA10839 | 16 | 10 | 20 | 39  | 27  | 31  | 38  | 43  | 39  |
| SMMPA10840 | 13 | 14 | 23 | 41  | 44  | 37  | 33  | 42  | 47  |
| SMMPA10841 | 14 | 13 | 21 | 45  | 32  | 25  | 33  | 30  | 24  |
| SMMPA10842 | 27 | 15 | 9  | 29  | 41  | 41  | 26  | 31  | 22  |
| SMMPA10843 | 17 | 20 | 20 | 45  | 35  | 30  | 30  | 31  | 32  |
| SMMPA10844 | 12 | 13 | 7  | 25  | 20  | 14  | 20  | 19  | 11  |
| SMMPA10845 | 26 | 32 | 23 | 74  | 79  | 74  | 47  | 64  | 50  |
| SMMPA10846 | 14 | 22 | 11 | 71  | 51  | 70  | 50  | 43  | 54  |
| SMMPA10847 | 27 | 31 | 33 | 128 | 93  | 91  | 54  | 73  | 60  |
| SMMPA10848 | 28 | 35 | 34 | 107 | 95  | 70  | 57  | 58  | 65  |
| SMMPA10849 | 28 | 33 | 21 | 133 | 100 | 76  | 61  | 105 | 67  |
| SMMPA10850 | 33 | 29 | 23 | 159 | 149 | 109 | 69  | 102 | 80  |
| SMMPA10851 | 30 | 25 | 21 | 58  | 59  | 44  | 38  | 40  | 51  |
| SMMPA10852 | 13 | 14 | 18 | 32  | 34  | 32  | 28  | 35  | 24  |
| SMMPA10853 | 8  | 10 | 13 | 32  | 33  | 29  | 27  | 23  | 21  |
| SMMPA10854 | 21 | 28 | 25 | 50  | 34  | 35  | 32  | 35  | 43  |
| SMMPA10855 | 19 | 29 | 24 | 48  | 44  | 56  | 31  | 60  | 41  |
| SMMPA10856 | 21 | 20 | 20 | 157 | 114 | 104 | 87  | 113 | 95  |
| SMMPA10857 | 18 | 18 | 13 | 140 | 119 | 100 | 77  | 107 | 86  |
| SMMPA10858 | 16 | 29 | 20 | 467 | 438 | 473 | 283 | 419 | 353 |
| SMMPA10859 | 24 | 33 | 16 | 221 | 207 | 170 | 124 | 149 | 126 |
| SMMPA10860 | 22 | 28 | 23 | 87  | 78  | 56  | 59  | 89  | 78  |
| SMMPA10861 | 35 | 27 | 28 | 150 | 148 | 102 | 94  | 108 | 79  |
| SMMPA10862 | 23 | 19 | 12 | 80  | 74  | 50  | 34  | 45  | 46  |
| SMMPA10863 | 17 | 20 | 18 | 228 | 155 | 148 | 89  | 112 | 136 |
| SMMPA10864 | 18 | 28 | 23 | 280 | 260 | 224 | 132 | 170 | 142 |
| SMMPA10865 | 16 | 17 | 17 | 142 | 140 | 102 | 78  | 84  | 67  |
| SMMPA10866 | 43 | 38 | 34 | 197 | 207 | 169 | 99  | 134 | 118 |
| SMMPA10867 | 20 | 20 | 18 | 60  | 61  | 46  | 51  | 65  | 52  |
| SMMPA10868 | 16 | 13 | 15 | 314 | 269 | 251 | 148 | 200 | 164 |

|            |    |    |    |     |     |     |     |     |     |
|------------|----|----|----|-----|-----|-----|-----|-----|-----|
| SMMPA10869 | 23 | 15 | 10 | 31  | 36  | 24  | 31  | 25  | 35  |
| SMMPA10870 | 36 | 42 | 41 | 61  | 55  | 52  | 42  | 66  | 68  |
| SMMPA10871 | 36 | 28 | 21 | 32  | 28  | 41  | 39  | 31  | 29  |
| SMMPA10872 | 35 | 23 | 22 | 73  | 85  | 64  | 36  | 73  | 68  |
| SMMPA10873 | 24 | 31 | 29 | 34  | 33  | 41  | 44  | 35  | 50  |
| SMMPA10874 | 15 | 20 | 8  | 61  | 52  | 44  | 28  | 54  | 46  |
| SMMPA10875 | 21 | 27 | 14 | 44  | 28  | 27  | 27  | 37  | 30  |
| SMMPA10876 | 15 | 20 | 14 | 46  | 44  | 45  | 22  | 32  | 28  |
| SMMPA10877 | 25 | 24 | 17 | 35  | 44  | 39  | 28  | 29  | 38  |
| SMMPA10878 | 24 | 12 | 23 | 80  | 80  | 58  | 46  | 57  | 53  |
| SMMPA10879 | 13 | 25 | 20 | 83  | 75  | 61  | 47  | 44  | 48  |
| SMMPA10880 | 23 | 25 | 25 | 92  | 79  | 71  | 59  | 50  | 58  |
| SMMPA10881 | 26 | 11 | 10 | 55  | 29  | 29  | 33  | 32  | 28  |
| SMMPA10882 | 22 | 20 | 23 | 95  | 68  | 62  | 29  | 45  | 38  |
| SMMPA10883 | 34 | 39 | 35 | 124 | 106 | 84  | 59  | 70  | 66  |
| SMMPA10884 | 5  | 13 | 11 | 248 | 228 | 164 | 96  | 136 | 124 |
| SMMPA10885 | 18 | 15 | 12 | 653 | 622 | 557 | 261 | 334 | 287 |
| SMMPA10886 | 9  | 12 | 9  | 138 | 108 | 120 | 53  | 67  | 67  |
| SMMPA10887 | 15 | 14 | 8  | 319 | 308 | 267 | 104 | 133 | 129 |
| SMMPA10888 | 18 | 9  | 10 | 293 | 283 | 237 | 128 | 142 | 164 |
| SMMPA10889 | 14 | 16 | 15 | 656 | 622 | 556 | 318 | 356 | 350 |
| SMMPA10890 | 6  | 8  | 4  | 40  | 39  | 18  | 16  | 25  | 26  |
| SMMPA10891 | 19 | 12 | 12 | 103 | 88  | 68  | 45  | 47  | 52  |
| SMMPA10892 | 19 | 14 | 14 | 57  | 60  | 50  | 24  | 32  | 37  |
| SMMPA10893 | 15 | 23 | 20 | 108 | 94  | 71  | 40  | 65  | 45  |
| SMMPA10894 | 22 | 15 | 16 | 89  | 69  | 50  | 40  | 55  | 49  |
| SMMPA10895 | 30 | 43 | 30 | 284 | 219 | 205 | 130 | 190 | 171 |
| SMMPA10896 | 35 | 43 | 33 | 404 | 346 | 261 | 215 | 288 | 241 |
| SMMPA10897 | 28 | 38 | 44 | 160 | 156 | 114 | 118 | 129 | 127 |
| SMMPA10898 | 24 | 24 | 15 | 130 | 109 | 94  | 43  | 93  | 66  |
| SMMPA10899 | 17 | 24 | 9  | 16  | 15  | 15  | 30  | 19  | 32  |
| SMMPA10900 | 13 | 19 | 14 | 231 | 179 | 176 | 93  | 108 | 100 |
| SMMPA10901 | 18 | 21 | 19 | 196 | 167 | 124 | 92  | 115 | 89  |
| SMMPA10902 | 15 | 13 | 9  | 216 | 181 | 149 | 93  | 97  | 88  |
| SMMPA10903 | 10 | 10 | 9  | 154 | 121 | 96  | 61  | 65  | 69  |
| SMMPA10904 | 22 | 21 | 15 | 98  | 69  | 67  | 57  | 68  | 71  |
| SMMPA10905 | 9  | 11 | 10 | 21  | 32  | 22  | 15  | 23  | 30  |
| SMMPA10906 | 27 | 27 | 27 | 73  | 68  | 47  | 37  | 44  | 69  |
| SMMPA10907 | 32 | 26 | 32 | 74  | 85  | 59  | 28  | 39  | 44  |
| SMMPA10908 | 19 | 13 | 24 | 64  | 57  | 67  | 36  | 41  | 37  |
| SMMPA10909 | 12 | 12 | 8  | 52  | 29  | 31  | 30  | 27  | 49  |

|            |    |    |    |     |     |     |     |     |     |
|------------|----|----|----|-----|-----|-----|-----|-----|-----|
| SMMPA10910 | 23 | 18 | 16 | 67  | 59  | 60  | 40  | 46  | 34  |
| SMMPA10911 | 12 | 12 | 12 | 20  | 12  | 8   | 14  | 10  | 18  |
| SMMPA10912 | 18 | 24 | 25 | 291 | 270 | 236 | 140 | 238 | 198 |
| SMMPA10913 | 9  | 11 | 16 | 301 | 309 | 215 | 207 | 208 | 179 |
| SMMPA10914 | 34 | 32 | 35 | 273 | 232 | 167 | 131 | 150 | 171 |
| SMMPA10915 | 23 | 23 | 17 | 220 | 198 | 150 | 101 | 149 | 124 |
| SMMPA10916 | 18 | 16 | 16 | 418 | 395 | 332 | 238 | 265 | 261 |
| SMMPA10917 | 13 | 13 | 17 | 39  | 32  | 47  | 22  | 22  | 23  |
| SMMPA10918 | 10 | 7  | 9  | 9   | 6   | 2   | 7   | 10  | 9   |
| SMMPA10919 | 43 | 49 | 27 | 65  | 82  | 57  | 48  | 76  | 76  |
| SMMPA10920 | 10 | 12 | 18 | 451 | 459 | 378 | 305 | 400 | 392 |
| SMMPA10921 | 10 | 11 | 13 | 19  | 26  | 33  | 18  | 22  | 18  |
| SMMPA10922 | 8  | 20 | 7  | 72  | 61  | 33  | 36  | 37  | 47  |
| SMMPA10923 | 22 | 8  | 14 | 21  | 25  | 16  | 25  | 34  | 29  |
| SMMPA10924 | 14 | 30 | 20 | 36  | 36  | 38  | 27  | 40  | 44  |
| SMMPA10925 | 11 | 12 | 9  | 98  | 90  | 69  | 69  | 88  | 76  |
| SMMPA10926 | 4  | 8  | 7  | 92  | 60  | 60  | 46  | 67  | 56  |
| SMMPA10927 | 5  | 3  | 2  | 24  | 19  | 18  | 16  | 20  | 22  |
| SMMPA10928 | 13 | 10 | 17 | 69  | 55  | 60  | 36  | 47  | 51  |
| SMMPA10929 | 16 | 20 | 16 | 38  | 26  | 30  | 32  | 37  | 28  |
| SMMPA10930 | 8  | 6  | 5  | 24  | 29  | 19  | 13  | 21  | 12  |
| SMMPA10931 | 23 | 27 | 31 | 56  | 56  | 47  | 64  | 59  | 53  |
| SMMPA10932 | 8  | 12 | 10 | 28  | 23  | 26  | 20  | 14  | 23  |
| SMMPA10933 | 40 | 39 | 31 | 149 | 159 | 119 | 93  | 131 | 105 |
| SMMPA10934 | 23 | 24 | 33 | 74  | 71  | 49  | 39  | 61  | 53  |
| SMMPA10935 | 28 | 21 | 15 | 78  | 73  | 63  | 44  | 60  | 49  |
| SMMPA10936 | 13 | 19 | 12 | 58  | 67  | 49  | 39  | 57  | 48  |
| SMMPA10937 | 79 | 86 | 74 | 73  | 71  | 76  | 61  | 96  | 101 |
| SMMPA10938 | 27 | 35 | 22 | 113 | 109 | 66  | 48  | 58  | 78  |
| SMMPA10939 | 24 | 29 | 22 | 101 | 75  | 66  | 64  | 77  | 58  |
| SMMPA10940 | 13 | 17 | 13 | 78  | 80  | 63  | 45  | 67  | 63  |
| SMMPA10941 | 48 | 42 | 25 | 113 | 94  | 93  | 63  | 83  | 88  |
| SMMPA10942 | 37 | 37 | 28 | 116 | 101 | 115 | 74  | 91  | 72  |
| SMMPA10943 | 15 | 19 | 19 | 17  | 12  | 11  | 19  | 19  | 30  |
| SMMPA10944 | 11 | 19 | 24 | 17  | 13  | 23  | 17  | 22  | 31  |
| SMMPA10945 | 16 | 16 | 27 | 12  | 20  | 23  | 20  | 26  | 24  |
| SMMPA10946 | 20 | 10 | 5  | 15  | 8   | 13  | 23  | 16  | 15  |
| SMMPA10947 | 6  | 9  | 8  | 12  | 13  | 12  | 13  | 18  | 15  |
| SMMPA10948 | 10 | 13 | 22 | 17  | 16  | 12  | 11  | 18  | 21  |
| SMMPA10949 | 26 | 21 | 15 | 32  | 37  | 50  | 25  | 52  | 30  |
| SMMPA10950 | 16 | 22 | 19 | 73  | 54  | 54  | 39  | 59  | 59  |

|            |    |    |    |     |     |     |     |     |     |
|------------|----|----|----|-----|-----|-----|-----|-----|-----|
| SMMPA10951 | 25 | 25 | 21 | 126 | 73  | 82  | 25  | 31  | 33  |
| SMMPA10952 | 18 | 25 | 15 | 171 | 163 | 113 | 66  | 90  | 75  |
| SMMPA10953 | 18 | 8  | 10 | 54  | 45  | 38  | 31  | 41  | 39  |
| SMMPA10954 | 27 | 30 | 21 | 197 | 170 | 130 | 60  | 92  | 89  |
| SMMPA10955 | 6  | 12 | 19 | 18  | 17  | 15  | 9   | 15  | 17  |
| SMMPA10956 | 22 | 22 | 16 | 57  | 47  | 43  | 28  | 40  | 39  |
| SMMPA10957 | 13 | 16 | 12 | 29  | 23  | 28  | 19  | 22  | 16  |
| SMMPA10958 | 22 | 24 | 31 | 78  | 81  | 69  | 56  | 62  | 38  |
| SMMPA10959 | 10 | 10 | 13 | 37  | 32  | 23  | 14  | 19  | 19  |
| SMMPA10960 | 9  | 13 | 11 | 46  | 42  | 27  | 21  | 25  | 32  |
| SMMPA10961 | 24 | 19 | 18 | 737 | 669 | 604 | 349 | 528 | 464 |
| SMMPA10962 | 22 | 18 | 15 | 892 | 851 | 824 | 646 | 847 | 790 |
| SMMPA10963 | 30 | 15 | 18 | 274 | 292 | 230 | 188 | 248 | 237 |
| SMMPA10964 | 10 | 13 | 12 | 777 | 723 | 728 | 547 | 602 | 592 |
| SMMPA10965 | 43 | 36 | 31 | 448 | 462 | 338 | 297 | 347 | 313 |
| SMMPA10966 | 16 | 15 | 16 | 820 | 797 | 653 | 394 | 509 | 469 |
| SMMPA10967 | 18 | 24 | 16 | 531 | 441 | 360 | 306 | 386 | 368 |
| SMMPA10968 | 28 | 25 | 26 | 822 | 799 | 641 | 559 | 742 | 654 |
| SMMPA10969 | 15 | 19 | 16 | 69  | 68  | 47  | 41  | 66  | 56  |
| SMMPA10970 | 21 | 29 | 37 | 176 | 143 | 112 | 85  | 101 | 97  |
| SMMPA10971 | 19 | 15 | 17 | 116 | 76  | 50  | 59  | 93  | 67  |
| SMMPA10972 | 29 | 27 | 30 | 212 | 184 | 120 | 105 | 145 | 125 |
| SMMPA10973 | 22 | 26 | 33 | 173 | 161 | 114 | 73  | 90  | 82  |
| SMMPA10974 | 10 | 26 | 26 | 82  | 71  | 57  | 59  | 66  | 56  |
| SMMPA10975 | 23 | 30 | 34 | 20  | 20  | 25  | 31  | 39  | 31  |
| SMMPA10976 | 23 | 33 | 17 | 41  | 25  | 36  | 27  | 46  | 41  |
| SMMPA10977 | 10 | 4  | 5  | 17  | 13  | 12  | 10  | 12  | 19  |
| SMMPA10978 | 12 | 9  | 9  | 74  | 48  | 48  | 30  | 55  | 29  |
| SMMPA10979 | 6  | 7  | 7  | 6   | 6   | 12  | 11  | 8   | 6   |
| SMMPA10980 | 15 | 15 | 14 | 51  | 32  | 41  | 39  | 54  | 45  |
| SMMPA10981 | 30 | 38 | 35 | 67  | 64  | 55  | 51  | 66  | 69  |
| SMMPA10982 | 16 | 27 | 22 | 355 | 264 | 246 | 181 | 236 | 214 |
| SMMPA10983 | 35 | 23 | 24 | 79  | 88  | 58  | 60  | 66  | 68  |
| SMMPA10984 | 36 | 34 | 30 | 84  | 61  | 56  | 51  | 106 | 86  |
| SMMPA10985 | 4  | 4  | 4  | 59  | 63  | 58  | 38  | 51  | 57  |
| SMMPA10986 | 12 | 13 | 12 | 141 | 118 | 125 | 71  | 99  | 87  |
| SMMPA10987 | 0  | 0  | 2  | 5   | 5   | 9   | 2   | 5   | 5   |
| SMMPA10988 | 6  | 10 | 8  | 19  | 18  | 19  | 21  | 24  | 16  |
| SMMPA10989 | 10 | 11 | 12 | 22  | 20  | 11  | 9   | 14  | 12  |
| SMMPA10990 | 3  | 3  | 6  | 11  | 14  | 12  | 17  | 10  | 11  |
| SMMPA10991 | 35 | 28 | 30 | 224 | 204 | 174 | 80  | 83  | 94  |

|            |    |    |    |     |     |     |     |     |     |
|------------|----|----|----|-----|-----|-----|-----|-----|-----|
| SMMPA10992 | 17 | 18 | 15 | 64  | 60  | 49  | 47  | 50  | 40  |
| SMMPA10993 | 25 | 39 | 29 | 75  | 98  | 66  | 51  | 65  | 64  |
| SMMPA10994 | 17 | 16 | 20 | 51  | 51  | 34  | 33  | 35  | 31  |
| SMMPA10995 | 0  | 1  | 1  | 3   | 2   | 0   | 0   | 0   | 4   |
| SMMPA10996 | 18 | 15 | 12 | 68  | 46  | 37  | 23  | 50  | 36  |
| SMMPA10997 | 13 | 14 | 14 | 10  | 15  | 16  | 19  | 25  | 27  |
| SMMPA10998 | 19 | 20 | 21 | 37  | 29  | 34  | 23  | 36  | 40  |
| SMMPA10999 | 13 | 16 | 17 | 18  | 10  | 10  | 22  | 31  | 16  |
| SMMPA11000 | 9  | 12 | 13 | 15  | 17  | 20  | 24  | 18  | 20  |
| SMMPA11001 | 6  | 10 | 9  | 155 | 141 | 134 | 62  | 73  | 71  |
| SMMPA11002 | 19 | 14 | 14 | 23  | 19  | 19  | 19  | 24  | 20  |
| SMMPA11003 | 24 | 14 | 11 | 95  | 74  | 61  | 53  | 57  | 48  |
| SMMPA11004 | 31 | 23 | 32 | 44  | 45  | 32  | 32  | 48  | 42  |
| SMMPA11005 | 20 | 16 | 18 | 137 | 137 | 94  | 72  | 108 | 102 |
| SMMPA11006 | 23 | 19 | 25 | 16  | 21  | 19  | 25  | 35  | 41  |
| SMMPA11007 | 17 | 8  | 18 | 38  | 44  | 26  | 31  | 29  | 35  |
| SMMPA11008 | 32 | 29 | 25 | 146 | 146 | 109 | 55  | 77  | 88  |
| SMMPA11009 | 10 | 7  | 10 | 175 | 150 | 133 | 65  | 78  | 69  |
| SMMPA11010 | 19 | 21 | 21 | 81  | 92  | 80  | 45  | 45  | 63  |
| SMMPA11011 | 27 | 21 | 23 | 106 | 96  | 90  | 68  | 91  | 76  |
| SMMPA11012 | 15 | 17 | 16 | 171 | 134 | 103 | 58  | 97  | 73  |
| SMMPA11013 | 11 | 15 | 13 | 12  | 6   | 12  | 13  | 12  | 16  |
| SMMPA11014 | 30 | 19 | 23 | 63  | 55  | 54  | 32  | 46  | 28  |
| SMMPA11015 | 32 | 31 | 21 | 95  | 82  | 62  | 53  | 74  | 65  |
| SMMPA11016 | 13 | 26 | 15 | 73  | 51  | 43  | 28  | 39  | 40  |
| SMMPA11017 | 19 | 16 | 21 | 13  | 30  | 27  | 19  | 25  | 25  |
| SMMPA11018 | 11 | 17 | 6  | 37  | 33  | 18  | 23  | 22  | 26  |
| SMMPA11019 | 26 | 21 | 20 | 87  | 108 | 93  | 34  | 58  | 49  |
| SMMPA11020 | 19 | 12 | 10 | 36  | 25  | 29  | 26  | 30  | 19  |
| SMMPA11021 | 7  | 8  | 10 | 34  | 26  | 10  | 19  | 21  | 30  |
| SMMPA11022 | 17 | 13 | 11 | 28  | 23  | 21  | 23  | 33  | 27  |
| SMMPA11023 | 14 | 19 | 17 | 53  | 54  | 26  | 26  | 43  | 30  |
| SMMPA11024 | 4  | 6  | 5  | 9   | 12  | 3   | 6   | 11  | 12  |
| SMMPA11025 | 15 | 13 | 14 | 13  | 7   | 9   | 10  | 14  | 20  |
| SMMPA11026 | 7  | 4  | 4  | 19  | 16  | 12  | 9   | 13  | 11  |
| SMMPA11027 | 51 | 42 | 37 | 796 | 728 | 597 | 514 | 651 | 582 |
| SMMPA11028 | 10 | 13 | 12 | 129 | 120 | 85  | 43  | 66  | 67  |
| SMMPA11029 | 17 | 13 | 9  | 39  | 19  | 33  | 15  | 20  | 23  |
| SMMPA11030 | 17 | 25 | 20 | 66  | 56  | 45  | 41  | 50  | 44  |
| SMMPA11031 | 32 | 30 | 26 | 275 | 251 | 183 | 77  | 109 | 86  |
| SMMPA11032 | 16 | 26 | 26 | 182 | 156 | 126 | 83  | 85  | 92  |

|            |    |    |    |     |     |     |     |     |     |
|------------|----|----|----|-----|-----|-----|-----|-----|-----|
| SMMPA11033 | 24 | 24 | 11 | 218 | 181 | 135 | 76  | 99  | 74  |
| SMMPA11034 | 13 | 9  | 12 | 33  | 22  | 32  | 17  | 21  | 20  |
| SMMPA11035 | 41 | 32 | 34 | 201 | 166 | 147 | 86  | 92  | 90  |
| SMMPA11036 | 0  | 0  | 0  | 0   | 0   | 2   | 0   | 0   | 0   |
| SMMPA11037 | 10 | 15 | 9  | 29  | 24  | 29  | 19  | 33  | 25  |
| SMMPA11038 | 16 | 18 | 14 | 89  | 82  | 59  | 39  | 65  | 56  |
| SMMPA11039 | 23 | 13 | 17 | 204 | 189 | 145 | 110 | 169 | 168 |
| SMMPA11040 | 28 | 34 | 23 | 356 | 287 | 245 | 163 | 211 | 163 |
| SMMPA11041 | 31 | 36 | 38 | 288 | 243 | 161 | 128 | 206 | 163 |
| SMMPA11042 | 48 | 40 | 41 | 115 | 97  | 79  | 61  | 103 | 79  |
| SMMPA11043 | 43 | 37 | 37 | 133 | 118 | 108 | 89  | 136 | 97  |
| SMMPA11044 | 28 | 32 | 36 | 39  | 39  | 45  | 50  | 46  | 41  |
| SMMPA11045 | 54 | 51 | 44 | 94  | 104 | 83  | 89  | 113 | 113 |
| SMMPA11046 | 35 | 36 | 27 | 36  | 30  | 29  | 32  | 41  | 36  |
| SMMPA11047 | 16 | 19 | 16 | 35  | 31  | 32  | 31  | 32  | 30  |
| SMMPA11048 | 52 | 55 | 54 | 37  | 41  | 34  | 85  | 56  | 81  |
| SMMPA11049 | 13 | 24 | 9  | 33  | 23  | 25  | 17  | 25  | 14  |
| SMMPA11050 | 19 | 15 | 11 | 17  | 26  | 21  | 19  | 29  | 23  |
| SMMPA11051 | 84 | 88 | 73 | 56  | 76  | 57  | 75  | 82  | 88  |
| SMMPA11052 | 19 | 20 | 25 | 46  | 29  | 30  | 25  | 44  | 37  |
| SMMPA11053 | 21 | 13 | 22 | 18  | 24  | 27  | 19  | 25  | 14  |
| SMMPA11054 | 23 | 36 | 21 | 61  | 60  | 49  | 35  | 65  | 47  |
| SMMPA11055 | 14 | 20 | 19 | 26  | 22  | 18  | 29  | 32  | 23  |
| SMMPA11056 | 16 | 11 | 11 | 47  | 41  | 22  | 43  | 39  | 56  |
| SMMPA11057 | 27 | 43 | 27 | 242 | 223 | 160 | 99  | 156 | 122 |
| SMMPA11058 | 24 | 22 | 22 | 49  | 38  | 34  | 41  | 36  | 47  |
| SMMPA11059 | 21 | 26 | 21 | 47  | 32  | 31  | 27  | 40  | 25  |
| SMMPA11060 | 15 | 19 | 17 | 27  | 27  | 13  | 18  | 25  | 21  |
| SMMPA11061 | 19 | 36 | 33 | 120 | 103 | 78  | 88  | 105 | 94  |
| SMMPA11062 | 27 | 26 | 12 | 266 | 206 | 185 | 113 | 152 | 125 |
| SMMPA11063 | 1  | 5  | 5  | 78  | 54  | 45  | 26  | 59  | 47  |
| SMMPA11064 | 20 | 21 | 10 | 316 | 288 | 210 | 147 | 167 | 172 |
| SMMPA11065 | 26 | 17 | 20 | 163 | 145 | 127 | 80  | 89  | 83  |
| SMMPA11066 | 17 | 27 | 29 | 291 | 248 | 249 | 107 | 135 | 105 |
| SMMPA11067 | 19 | 20 | 27 | 237 | 222 | 213 | 102 | 140 | 121 |
| SMMPA11068 | 18 | 20 | 14 | 106 | 136 | 111 | 50  | 83  | 81  |
| SMMPA11069 | 21 | 41 | 29 | 288 | 304 | 206 | 105 | 150 | 131 |
| SMMPA11070 | 10 | 13 | 11 | 189 | 212 | 137 | 64  | 94  | 78  |
| SMMPA11071 | 18 | 13 | 11 | 182 | 185 | 172 | 61  | 99  | 108 |
| SMMPA11072 | 21 | 27 | 23 | 54  | 46  | 31  | 32  | 59  | 23  |
| SMMPA11073 | 27 | 27 | 19 | 46  | 40  | 37  | 28  | 31  | 34  |

|            |    |    |    |     |     |     |     |     |     |
|------------|----|----|----|-----|-----|-----|-----|-----|-----|
| SMMPA11074 | 25 | 33 | 25 | 224 | 200 | 141 | 77  | 96  | 109 |
| SMMPA11075 | 26 | 20 | 26 | 70  | 52  | 41  | 45  | 49  | 46  |
| SMMPA11076 | 13 | 16 | 21 | 49  | 56  | 49  | 32  | 34  | 25  |
| SMMPA11077 | 29 | 40 | 27 | 44  | 50  | 42  | 42  | 52  | 42  |
| SMMPA11078 | 18 | 17 | 23 | 22  | 26  | 27  | 34  | 32  | 23  |
| SMMPA11079 | 23 | 21 | 23 | 53  | 43  | 43  | 30  | 35  | 43  |
| SMMPA11080 | 25 | 25 | 25 | 32  | 28  | 19  | 30  | 43  | 26  |
| SMMPA11081 | 55 | 56 | 29 | 56  | 49  | 54  | 51  | 48  | 41  |
| SMMPA11082 | 15 | 20 | 16 | 76  | 101 | 81  | 29  | 48  | 32  |
| SMMPA11083 | 46 | 46 | 34 | 242 | 253 | 186 | 113 | 144 | 144 |
| SMMPA11084 | 38 | 50 | 35 | 117 | 93  | 76  | 58  | 60  | 69  |
| SMMPA11085 | 33 | 43 | 31 | 167 | 151 | 124 | 48  | 82  | 85  |
| SMMPA11086 | 23 | 23 | 9  | 65  | 50  | 56  | 28  | 41  | 38  |
| SMMPA11087 | 42 | 45 | 42 | 218 | 195 | 141 | 80  | 116 | 90  |
| SMMPA11088 | 27 | 27 | 11 | 81  | 73  | 75  | 34  | 60  | 57  |
| SMMPA11089 | 21 | 13 | 9  | 11  | 16  | 13  | 15  | 15  | 20  |
| SMMPA11090 | 42 | 58 | 42 | 200 | 205 | 148 | 98  | 138 | 101 |
| SMMPA11091 | 46 | 46 | 34 | 123 | 113 | 108 | 84  | 110 | 82  |
| SMMPA11092 | 23 | 19 | 23 | 130 | 124 | 91  | 49  | 64  | 57  |
| SMMPA11093 | 27 | 26 | 27 | 87  | 69  | 63  | 44  | 49  | 50  |
| SMMPA11094 | 26 | 13 | 18 | 61  | 68  | 63  | 40  | 56  | 53  |
| SMMPA11095 | 7  | 12 | 12 | 23  | 30  | 27  | 11  | 22  | 25  |
| SMMPA11096 | 14 | 23 | 9  | 39  | 42  | 36  | 26  | 42  | 26  |
| SMMPA11097 | 18 | 18 | 18 | 68  | 68  | 54  | 34  | 50  | 48  |
| SMMPA11098 | 17 | 22 | 18 | 49  | 38  | 31  | 13  | 24  | 21  |
| SMMPA11099 | 9  | 7  | 4  | 31  | 27  | 22  | 21  | 23  | 13  |
| SMMPA11100 | 6  | 8  | 9  | 19  | 12  | 16  | 17  | 10  | 6   |
| SMMPA11101 | 5  | 7  | 3  | 13  | 10  | 8   | 4   | 7   | 9   |
| SMMPA11102 | 17 | 9  | 19 | 34  | 38  | 27  | 19  | 30  | 23  |
| SMMPA11103 | 25 | 27 | 25 | 213 | 199 | 155 | 122 | 152 | 146 |
| SMMPA11104 | 10 | 7  | 6  | 37  | 37  | 38  | 19  | 21  | 16  |
| SMMPA11105 | 5  | 3  | 4  | 14  | 11  | 11  | 4   | 10  | 8   |
| SMMPA11106 | 12 | 26 | 13 | 95  | 74  | 66  | 42  | 48  | 52  |
| SMMPA11107 | 39 | 34 | 28 | 22  | 20  | 33  | 38  | 42  | 48  |
| SMMPA11108 | 13 | 13 | 8  | 26  | 25  | 21  | 18  | 26  | 20  |
| SMMPA11109 | 25 | 24 | 14 | 25  | 26  | 28  | 49  | 41  | 48  |
| SMMPA11110 | 32 | 20 | 22 | 98  | 79  | 74  | 70  | 86  | 76  |
| SMMPA11111 | 19 | 21 | 8  | 23  | 23  | 22  | 22  | 30  | 32  |
| SMMPA11112 | 13 | 9  | 15 | 145 | 158 | 125 | 62  | 71  | 56  |
| SMMPA11113 | 28 | 25 | 21 | 110 | 100 | 80  | 81  | 101 | 63  |
| SMMPA11114 | 21 | 34 | 20 | 105 | 97  | 69  | 45  | 76  | 48  |



|            |    |    |    |     |     |     |     |     |     |
|------------|----|----|----|-----|-----|-----|-----|-----|-----|
| SMMPA11115 | 29 | 29 | 30 | 563 | 445 | 441 | 165 | 250 | 221 |
| SMMPA11116 | 29 | 19 | 25 | 85  | 100 | 74  | 62  | 79  | 72  |
| SMMPA11117 | 5  | 15 | 11 | 25  | 21  | 26  | 24  | 22  | 32  |
| SMMPA11118 | 15 | 10 | 18 | 60  | 55  | 54  | 34  | 37  | 39  |
| SMMPA11119 | 23 | 30 | 23 | 95  | 95  | 74  | 62  | 70  | 63  |
| SMMPA11120 | 24 | 17 | 15 | 66  | 54  | 64  | 39  | 34  | 40  |
| SMMPA11121 | 9  | 4  | 5  | 38  | 43  | 46  | 11  | 29  | 26  |
| SMMPA11122 | 18 | 12 | 14 | 58  | 45  | 38  | 24  | 25  | 34  |
| SMMPA11123 | 21 | 18 | 15 | 50  | 49  | 44  | 39  | 55  | 48  |
| SMMPA11124 | 24 | 14 | 12 | 97  | 84  | 94  | 51  | 71  | 45  |
| SMMPA11125 | 8  | 8  | 13 | 33  | 34  | 24  | 26  | 34  | 18  |
| SMMPA11126 | 12 | 13 | 11 | 39  | 30  | 26  | 19  | 15  | 20  |
| SMMPA11127 | 16 | 19 | 25 | 64  | 53  | 48  | 60  | 80  | 85  |
| SMMPA11128 | 7  | 6  | 5  | 10  | 9   | 15  | 12  | 16  | 12  |
| SMMPA11129 | 17 | 30 | 13 | 42  | 38  | 22  | 35  | 55  | 43  |
| SMMPA11130 | 7  | 9  | 8  | 9   | 12  | 8   | 7   | 14  | 9   |
| SMMPA11131 | 23 | 25 | 20 | 28  | 24  | 20  | 24  | 21  | 23  |
| SMMPA11132 | 44 | 33 | 33 | 104 | 97  | 78  | 49  | 56  | 63  |
| SMMPA11133 | 16 | 12 | 15 | 116 | 83  | 60  | 52  | 56  | 58  |
| SMMPA11134 | 43 | 46 | 41 | 99  | 95  | 87  | 52  | 71  | 86  |
| SMMPA11135 | 19 | 23 | 10 | 162 | 145 | 106 | 72  | 111 | 112 |
| SMMPA11136 | 10 | 12 | 10 | 156 | 128 | 98  | 66  | 97  | 84  |
| SMMPA11137 | 10 | 13 | 8  | 18  | 21  | 20  | 12  | 14  | 8   |
| SMMPA11138 | 28 | 36 | 29 | 73  | 78  | 61  | 56  | 84  | 49  |
| SMMPA11139 | 24 | 22 | 27 | 127 | 138 | 117 | 76  | 85  | 76  |
| SMMPA11140 | 18 | 20 | 23 | 151 | 118 | 88  | 66  | 113 | 122 |
| SMMPA11141 | 13 | 33 | 20 | 137 | 145 | 102 | 72  | 99  | 96  |
| SMMPA11142 | 21 | 20 | 25 | 81  | 52  | 39  | 55  | 56  | 82  |
| SMMPA11143 | 22 | 29 | 24 | 27  | 22  | 23  | 18  | 35  | 21  |
| SMMPA11144 | 71 | 56 | 60 | 47  | 54  | 49  | 53  | 83  | 75  |
| SMMPA11145 | 26 | 18 | 24 | 28  | 20  | 22  | 21  | 34  | 23  |
| SMMPA11146 | 30 | 54 | 35 | 51  | 42  | 34  | 44  | 74  | 79  |
| SMMPA11147 | 24 | 20 | 28 | 26  | 22  | 22  | 25  | 40  | 37  |
| SMMPA11148 | 63 | 82 | 52 | 55  | 45  | 47  | 52  | 72  | 43  |
| SMMPA11149 | 11 | 10 | 10 | 11  | 14  | 11  | 8   | 12  | 16  |
| SMMPA11150 | 54 | 23 | 37 | 45  | 36  | 43  | 33  | 51  | 58  |
| SMMPA11151 | 23 | 26 | 20 | 35  | 24  | 36  | 33  | 33  | 33  |
| SMMPA11152 | 24 | 15 | 13 | 14  | 15  | 16  | 22  | 25  | 28  |
| SMMPA11153 | 11 | 11 | 10 | 79  | 77  | 64  | 32  | 40  | 45  |
| SMMPA11154 | 31 | 31 | 42 | 503 | 459 | 370 | 168 | 222 | 237 |
| SMMPA11155 | 24 | 24 | 18 | 304 | 273 | 234 | 101 | 161 | 152 |

|            |    |    |    |     |     |     |     |     |     |
|------------|----|----|----|-----|-----|-----|-----|-----|-----|
| SMMPA11156 | 15 | 16 | 11 | 163 | 180 | 131 | 62  | 85  | 56  |
| SMMPA11157 | 20 | 30 | 30 | 108 | 87  | 75  | 74  | 56  | 73  |
| SMMPA11158 | 9  | 8  | 13 | 178 | 146 | 112 | 71  | 105 | 104 |
| SMMPA11159 | 14 | 18 | 20 | 132 | 120 | 74  | 64  | 79  | 75  |
| SMMPA11160 | 19 | 29 | 26 | 705 | 643 | 575 | 276 | 422 | 411 |
| SMMPA11161 | 20 | 26 | 19 | 527 | 506 | 435 | 220 | 274 | 218 |
| SMMPA11162 | 32 | 23 | 28 | 334 | 239 | 206 | 114 | 151 | 126 |
| SMMPA11163 | 11 | 9  | 8  | 49  | 50  | 39  | 21  | 38  | 36  |
| SMMPA11164 | 33 | 27 | 25 | 127 | 107 | 84  | 74  | 117 | 102 |
| SMMPA11165 | 18 | 24 | 18 | 62  | 55  | 33  | 44  | 45  | 39  |
| SMMPA11166 | 16 | 15 | 10 | 20  | 26  | 22  | 21  | 35  | 41  |
| SMMPA11167 | 10 | 12 | 10 | 17  | 6   | 10  | 22  | 23  | 17  |
| SMMPA11168 | 12 | 10 | 13 | 6   | 6   | 15  | 15  | 18  | 15  |
| SMMPA11169 | 22 | 27 | 22 | 56  | 57  | 54  | 37  | 66  | 39  |
| SMMPA11170 | 17 | 24 | 12 | 20  | 12  | 19  | 20  | 35  | 23  |
| SMMPA11171 | 14 | 19 | 13 | 16  | 18  | 17  | 27  | 35  | 28  |
| SMMPA11172 | 15 | 12 | 14 | 67  | 67  | 46  | 40  | 55  | 54  |
| SMMPA11173 | 24 | 31 | 14 | 85  | 58  | 62  | 72  | 75  | 77  |
| SMMPA11174 | 13 | 7  | 10 | 215 | 181 | 172 | 114 | 137 | 135 |
| SMMPA11175 | 9  | 5  | 6  | 9   | 2   | 7   | 2   | 4   | 6   |
| SMMPA11176 | 29 | 34 | 18 | 46  | 52  | 45  | 18  | 40  | 41  |
| SMMPA11177 | 29 | 33 | 37 | 124 | 94  | 79  | 51  | 62  | 59  |
| SMMPA11178 | 17 | 19 | 15 | 21  | 16  | 19  | 16  | 17  | 16  |
| SMMPA11179 | 19 | 24 | 15 | 41  | 60  | 44  | 31  | 28  | 35  |
| SMMPA11180 | 40 | 39 | 41 | 87  | 103 | 60  | 43  | 74  | 62  |
| SMMPA11181 | 10 | 24 | 20 | 26  | 23  | 33  | 20  | 28  | 21  |
| SMMPA11182 | 30 | 26 | 38 | 117 | 123 | 91  | 41  | 60  | 57  |
| SMMPA11183 | 15 | 10 | 9  | 20  | 20  | 11  | 11  | 22  | 20  |
| SMMPA11184 | 39 | 39 | 25 | 42  | 36  | 36  | 26  | 34  | 38  |
| SMMPA11185 | 21 | 11 | 20 | 23  | 25  | 31  | 13  | 27  | 19  |
| SMMPA11186 | 17 | 17 | 11 | 261 | 222 | 210 | 147 | 196 | 204 |
| SMMPA11187 | 24 | 30 | 32 | 475 | 456 | 426 | 443 | 648 | 610 |
| SMMPA11188 | 17 | 26 | 23 | 182 | 153 | 123 | 131 | 172 | 172 |
| SMMPA11189 | 17 | 16 | 13 | 123 | 98  | 82  | 88  | 114 | 88  |
| SMMPA11190 | 3  | 3  | 1  | 9   | 14  | 8   | 13  | 12  | 12  |
| SMMPA11191 | 7  | 12 | 16 | 113 | 132 | 122 | 104 | 119 | 133 |
| SMMPA11192 | 24 | 19 | 18 | 281 | 210 | 177 | 166 | 231 | 223 |
| SMMPA11193 | 42 | 59 | 36 | 248 | 228 | 202 | 214 | 278 | 269 |
| SMMPA11194 | 14 | 21 | 25 | 32  | 38  | 27  | 42  | 35  | 27  |
| SMMPA11195 | 21 | 24 | 22 | 36  | 48  | 28  | 28  | 30  | 35  |
| SMMPA11196 | 35 | 32 | 29 | 134 | 116 | 107 | 69  | 75  | 75  |

|            |    |    |    |     |     |     |     |     |     |
|------------|----|----|----|-----|-----|-----|-----|-----|-----|
| SMMPA11197 | 17 | 20 | 18 | 48  | 29  | 16  | 34  | 39  | 35  |
| SMMPA11198 | 50 | 42 | 40 | 99  | 92  | 95  | 60  | 86  | 79  |
| SMMPA11199 | 15 | 17 | 13 | 40  | 42  | 39  | 23  | 34  | 30  |
| SMMPA11200 | 27 | 44 | 21 | 87  | 78  | 53  | 49  | 74  | 74  |
| SMMPA11201 | 24 | 12 | 16 | 38  | 41  | 41  | 39  | 47  | 44  |
| SMMPA11202 | 32 | 33 | 38 | 84  | 75  | 66  | 41  | 70  | 50  |
| SMMPA11203 | 22 | 23 | 9  | 27  | 37  | 24  | 27  | 36  | 34  |
| SMMPA11204 | 20 | 24 | 19 | 30  | 23  | 21  | 25  | 25  | 29  |
| SMMPA11205 | 23 | 22 | 15 | 40  | 31  | 26  | 26  | 27  | 32  |
| SMMPA11206 | 16 | 13 | 24 | 42  | 35  | 31  | 33  | 33  | 30  |
| SMMPA11207 | 25 | 21 | 21 | 16  | 24  | 23  | 23  | 26  | 33  |
| SMMPA11208 | 8  | 20 | 14 | 28  | 29  | 19  | 24  | 23  | 24  |
| SMMPA11209 | 10 | 14 | 11 | 24  | 24  | 20  | 19  | 17  | 26  |
| SMMPA11210 | 2  | 3  | 3  | 11  | 6   | 12  | 5   | 5   | 7   |
| SMMPA11211 | 17 | 12 | 12 | 233 | 245 | 197 | 108 | 117 | 148 |
| SMMPA11212 | 14 | 23 | 22 | 205 | 187 | 122 | 111 | 126 | 106 |
| SMMPA11213 | 25 | 29 | 26 | 304 | 276 | 210 | 99  | 131 | 120 |
| SMMPA11214 | 12 | 26 | 11 | 248 | 238 | 193 | 92  | 137 | 118 |
| SMMPA11215 | 16 | 26 | 17 | 181 | 142 | 117 | 49  | 64  | 59  |
| SMMPA11216 | 14 | 18 | 8  | 279 | 296 | 262 | 65  | 96  | 88  |
| SMMPA11217 | 15 | 25 | 16 | 212 | 227 | 206 | 60  | 88  | 54  |
| SMMPA11218 | 28 | 19 | 27 | 162 | 147 | 130 | 72  | 73  | 64  |
| SMMPA11219 | 7  | 13 | 8  | 149 | 158 | 127 | 44  | 77  | 69  |
| SMMPA11220 | 42 | 46 | 39 | 219 | 195 | 164 | 77  | 111 | 109 |
| SMMPA11221 | 10 | 7  | 10 | 164 | 186 | 162 | 49  | 84  | 85  |
| SMMPA11222 | 16 | 16 | 23 | 106 | 90  | 48  | 41  | 61  | 61  |
| SMMPA11223 | 21 | 30 | 19 | 514 | 449 | 407 | 299 | 365 | 330 |
| SMMPA11224 | 8  | 11 | 13 | 15  | 15  | 14  | 18  | 9   | 32  |
| SMMPA11225 | 19 | 22 | 18 | 103 | 90  | 77  | 45  | 55  | 60  |
| SMMPA11226 | 16 | 19 | 15 | 25  | 22  | 21  | 35  | 39  | 38  |
| SMMPA11227 | 45 | 53 | 44 | 138 | 135 | 125 | 124 | 174 | 161 |
| SMMPA11228 | 9  | 13 | 13 | 34  | 42  | 28  | 27  | 38  | 32  |
| SMMPA11229 | 19 | 12 | 8  | 135 | 136 | 84  | 61  | 65  | 82  |
| SMMPA11230 | 10 | 8  | 13 | 128 | 103 | 67  | 60  | 81  | 63  |
| SMMPA11231 | 7  | 15 | 8  | 20  | 17  | 13  | 28  | 29  | 26  |
| SMMPA11232 | 20 | 22 | 18 | 84  | 67  | 59  | 42  | 53  | 64  |
| SMMPA11233 | 8  | 8  | 8  | 105 | 91  | 89  | 42  | 55  | 51  |
| SMMPA11234 | 34 | 28 | 33 | 280 | 225 | 211 | 96  | 121 | 126 |
| SMMPA11235 | 23 | 23 | 21 | 203 | 178 | 141 | 118 | 151 | 130 |
| SMMPA11236 | 34 | 33 | 36 | 461 | 395 | 328 | 220 | 245 | 221 |
| SMMPA11237 | 11 | 10 | 13 | 81  | 60  | 52  | 31  | 44  | 40  |

|            |    |    |    |     |     |     |     |     |     |
|------------|----|----|----|-----|-----|-----|-----|-----|-----|
| SMMPA11238 | 13 | 16 | 15 | 174 | 149 | 171 | 52  | 84  | 75  |
| SMMPA11239 | 11 | 26 | 13 | 450 | 442 | 362 | 172 | 216 | 204 |
| SMMPA11240 | 19 | 25 | 18 | 60  | 49  | 34  | 35  | 40  | 39  |
| SMMPA11241 | 8  | 11 | 12 | 10  | 5   | 7   | 4   | 8   | 7   |
| SMMPA11242 | 27 | 35 | 15 | 54  | 49  | 57  | 75  | 98  | 95  |
| SMMPA11243 | 24 | 43 | 23 | 167 | 168 | 144 | 79  | 109 | 99  |
| SMMPA11244 | 27 | 23 | 19 | 105 | 74  | 61  | 42  | 56  | 57  |
| SMMPA11245 | 12 | 19 | 19 | 12  | 20  | 23  | 21  | 26  | 35  |
| SMMPA11246 | 23 | 24 | 18 | 32  | 24  | 30  | 34  | 45  | 33  |
| SMMPA11247 | 42 | 21 | 27 | 20  | 17  | 22  | 37  | 32  | 31  |
| SMMPA11248 | 9  | 17 | 12 | 14  | 18  | 11  | 10  | 19  | 13  |
| SMMPA11249 | 40 | 37 | 36 | 65  | 71  | 58  | 48  | 83  | 69  |
| SMMPA11250 | 8  | 11 | 9  | 11  | 16  | 8   | 14  | 17  | 20  |
| SMMPA11251 | 25 | 32 | 35 | 46  | 32  | 38  | 35  | 36  | 31  |
| SMMPA11252 | 22 | 19 | 10 | 23  | 27  | 28  | 28  | 27  | 27  |
| SMMPA11253 | 32 | 31 | 34 | 21  | 18  | 19  | 34  | 35  | 44  |
| SMMPA11254 | 30 | 22 | 23 | 26  | 30  | 26  | 31  | 31  | 43  |
| SMMPA11255 | 24 | 24 | 25 | 18  | 17  | 20  | 38  | 31  | 41  |
| SMMPA11256 | 30 | 28 | 32 | 48  | 50  | 51  | 36  | 50  | 36  |
| SMMPA11257 | 32 | 27 | 26 | 66  | 73  | 59  | 63  | 75  | 54  |
| SMMPA11258 | 14 | 10 | 2  | 40  | 37  | 29  | 13  | 15  | 17  |
| SMMPA11259 | 9  | 12 | 6  | 48  | 22  | 29  | 17  | 31  | 24  |
| SMMPA11260 | 26 | 31 | 21 | 146 | 117 | 79  | 86  | 98  | 84  |
| SMMPA11261 | 15 | 22 | 17 | 49  | 32  | 26  | 24  | 33  | 29  |
| SMMPA11262 | 20 | 19 | 15 | 65  | 37  | 31  | 39  | 47  | 45  |
| SMMPA11263 | 13 | 7  | 8  | 21  | 21  | 9   | 40  | 33  | 48  |
| SMMPA11264 | 21 | 31 | 16 | 99  | 85  | 86  | 59  | 50  | 56  |
| SMMPA11265 | 8  | 15 | 12 | 19  | 21  | 19  | 21  | 29  | 29  |
| SMMPA11266 | 29 | 30 | 20 | 52  | 51  | 42  | 37  | 45  | 43  |
| SMMPA11267 | 7  | 12 | 8  | 19  | 14  | 12  | 12  | 10  | 16  |
| SMMPA11268 | 9  | 17 | 13 | 25  | 31  | 20  | 25  | 28  | 39  |
| SMMPA11269 | 3  | 6  | 5  | 10  | 16  | 14  | 10  | 12  | 11  |
| SMMPA11270 | 13 | 17 | 8  | 38  | 33  | 22  | 26  | 30  | 31  |
| SMMPA11271 | 7  | 8  | 9  | 18  | 16  | 10  | 9   | 19  | 23  |
| SMMPA11272 | 6  | 15 | 18 | 34  | 36  | 26  | 16  | 16  | 26  |
| SMMPA11273 | 14 | 26 | 24 | 505 | 421 | 444 | 419 | 572 | 536 |
| SMMPA11274 | 15 | 20 | 18 | 349 | 347 | 287 | 232 | 320 | 263 |
| SMMPA11275 | 16 | 13 | 25 | 302 | 299 | 250 | 194 | 297 | 254 |
| SMMPA11276 | 13 | 18 | 27 | 602 | 626 | 571 | 451 | 613 | 534 |
| SMMPA11277 | 24 | 23 | 17 | 811 | 738 | 812 | 663 | 863 | 749 |
| SMMPA11278 | 34 | 37 | 29 | 654 | 606 | 525 | 588 | 779 | 679 |

|            |     |    |    |     |     |     |     |     |     |
|------------|-----|----|----|-----|-----|-----|-----|-----|-----|
| SMMPA11279 | 12  | 4  | 7  | 141 | 144 | 131 | 136 | 179 | 148 |
| SMMPA11280 | 19  | 25 | 21 | 410 | 392 | 345 | 271 | 383 | 349 |
| SMMPA11281 | 9   | 9  | 12 | 54  | 40  | 39  | 21  | 33  | 28  |
| SMMPA11282 | 21  | 24 | 21 | 71  | 50  | 43  | 43  | 46  | 42  |
| SMMPA11283 | 18  | 13 | 18 | 56  | 60  | 39  | 23  | 33  | 33  |
| SMMPA11284 | 10  | 15 | 12 | 51  | 42  | 39  | 30  | 37  | 41  |
| SMMPA11285 | 17  | 9  | 10 | 32  | 27  | 19  | 22  | 16  | 19  |
| SMMPA11286 | 17  | 21 | 7  | 23  | 28  | 18  | 15  | 19  | 18  |
| SMMPA11287 | 41  | 36 | 29 | 60  | 52  | 38  | 33  | 75  | 61  |
| SMMPA11288 | 19  | 28 | 22 | 120 | 94  | 90  | 47  | 72  | 66  |
| SMMPA11289 | 27  | 21 | 18 | 65  | 62  | 47  | 33  | 49  | 35  |
| SMMPA11290 | 9   | 12 | 15 | 38  | 22  | 15  | 19  | 28  | 27  |
| SMMPA11291 | 20  | 13 | 12 | 76  | 66  | 72  | 30  | 47  | 44  |
| SMMPA11292 | 10  | 13 | 11 | 57  | 62  | 50  | 19  | 48  | 32  |
| SMMPA11293 | 21  | 24 | 16 | 16  | 20  | 21  | 24  | 19  | 36  |
| SMMPA11294 | 30  | 31 | 31 | 86  | 68  | 53  | 54  | 69  | 55  |
| SMMPA11295 | 26  | 29 | 24 | 86  | 69  | 63  | 49  | 82  | 80  |
| SMMPA11296 | 31  | 31 | 14 | 66  | 52  | 42  | 52  | 74  | 75  |
| SMMPA11297 | 8   | 18 | 28 | 60  | 63  | 49  | 30  | 44  | 56  |
| SMMPA11298 | 106 | 98 | 74 | 124 | 124 | 109 | 76  | 100 | 86  |
| SMMPA11299 | 22  | 26 | 15 | 185 | 154 | 115 | 61  | 83  | 91  |
| SMMPA11300 | 8   | 12 | 12 | 22  | 27  | 21  | 9   | 15  | 15  |
| SMMPA11301 | 8   | 21 | 19 | 519 | 521 | 512 | 294 | 336 | 332 |
| SMMPA11302 | 23  | 18 | 21 | 373 | 385 | 288 | 191 | 272 | 237 |
| SMMPA11303 | 16  | 16 | 17 | 347 | 319 | 293 | 168 | 223 | 233 |
| SMMPA11304 | 27  | 33 | 25 | 445 | 404 | 362 | 176 | 231 | 208 |
| SMMPA11305 | 25  | 14 | 16 | 183 | 179 | 148 | 80  | 93  | 93  |
| SMMPA11306 | 30  | 37 | 31 | 582 | 585 | 477 | 247 | 314 | 272 |
| SMMPA11307 | 11  | 14 | 10 | 302 | 346 | 318 | 112 | 123 | 109 |
| SMMPA11308 | 17  | 22 | 31 | 147 | 149 | 113 | 93  | 99  | 100 |
| SMMPA11309 | 17  | 17 | 15 | 340 | 298 | 215 | 144 | 191 | 173 |
| SMMPA11310 | 28  | 29 | 28 | 198 | 166 | 156 | 74  | 119 | 98  |
| SMMPA11311 | 9   | 13 | 7  | 149 | 141 | 136 | 99  | 132 | 133 |
| SMMPA11312 | 13  | 21 | 13 | 163 | 142 | 95  | 80  | 104 | 93  |
| SMMPA11313 | 20  | 23 | 16 | 108 | 91  | 62  | 47  | 57  | 43  |
| SMMPA11314 | 30  | 35 | 35 | 36  | 44  | 27  | 30  | 39  | 30  |
| SMMPA11315 | 30  | 31 | 23 | 64  | 65  | 65  | 57  | 58  | 49  |
| SMMPA11316 | 13  | 18 | 25 | 16  | 10  | 9   | 23  | 26  | 25  |
| SMMPA11317 | 13  | 16 | 29 | 40  | 28  | 25  | 39  | 36  | 38  |
| SMMPA11318 | 15  | 18 | 13 | 24  | 33  | 31  | 18  | 25  | 26  |
| SMMPA11319 | 13  | 12 | 6  | 10  | 22  | 16  | 7   | 16  | 19  |

|            |    |    |    |     |     |     |     |     |     |
|------------|----|----|----|-----|-----|-----|-----|-----|-----|
| SMMPA11320 | 24 | 23 | 22 | 17  | 21  | 33  | 35  | 27  | 34  |
| SMMPA11321 | 18 | 16 | 13 | 22  | 21  | 22  | 17  | 23  | 22  |
| SMMPA11322 | 6  | 16 | 12 | 12  | 21  | 14  | 13  | 16  | 13  |
| SMMPA11323 | 27 | 25 | 26 | 120 | 92  | 104 | 92  | 115 | 101 |
| SMMPA11324 | 27 | 24 | 22 | 137 | 124 | 90  | 102 | 93  | 83  |
| SMMPA11325 | 14 | 13 | 5  | 74  | 68  | 48  | 39  | 48  | 39  |
| SMMPA11326 | 19 | 27 | 19 | 224 | 174 | 151 | 118 | 158 | 122 |
| SMMPA11327 | 44 | 42 | 42 | 903 | 790 | 684 | 584 | 717 | 671 |
| SMMPA11328 | 29 | 31 | 32 | 350 | 296 | 262 | 134 | 210 | 177 |
| SMMPA11329 | 24 | 29 | 17 | 226 | 208 | 166 | 135 | 154 | 150 |
| SMMPA11330 | 18 | 22 | 20 | 375 | 344 | 289 | 168 | 251 | 218 |
| SMMPA11331 | 32 | 36 | 22 | 202 | 167 | 143 | 99  | 130 | 106 |
| SMMPA11332 | 27 | 28 | 26 | 121 | 98  | 93  | 67  | 78  | 70  |
| SMMPA11333 | 11 | 9  | 11 | 38  | 57  | 49  | 15  | 18  | 20  |
| SMMPA11334 | 36 | 33 | 34 | 326 | 333 | 261 | 147 | 182 | 193 |
| SMMPA11335 | 24 | 35 | 27 | 65  | 71  | 60  | 45  | 57  | 55  |
| SMMPA11336 | 23 | 20 | 16 | 65  | 61  | 47  | 23  | 69  | 52  |
| SMMPA11337 | 17 | 27 | 23 | 184 | 217 | 170 | 79  | 118 | 91  |
| SMMPA11338 | 28 | 42 | 26 | 322 | 269 | 205 | 142 | 176 | 172 |
| SMMPA11339 | 28 | 27 | 36 | 209 | 166 | 157 | 82  | 98  | 101 |
| SMMPA11340 | 15 | 17 | 15 | 112 | 130 | 110 | 47  | 87  | 79  |
| SMMPA11341 | 20 | 20 | 18 | 63  | 57  | 50  | 50  | 48  | 42  |
| SMMPA11342 | 15 | 19 | 18 | 73  | 64  | 60  | 32  | 37  | 46  |
| SMMPA11343 | 7  | 9  | 6  | 12  | 8   | 11  | 10  | 12  | 11  |
| SMMPA11344 | 21 | 18 | 25 | 151 | 156 | 123 | 71  | 108 | 96  |
| SMMPA11345 | 15 | 7  | 11 | 64  | 56  | 42  | 29  | 33  | 32  |
| SMMPA11346 | 28 | 29 | 24 | 151 | 128 | 111 | 110 | 131 | 118 |
| SMMPA11347 | 16 | 22 | 22 | 256 | 244 | 234 | 83  | 112 | 85  |
| SMMPA11348 | 27 | 35 | 21 | 340 | 332 | 246 | 132 | 177 | 143 |
| SMMPA11349 | 13 | 14 | 12 | 159 | 183 | 155 | 85  | 96  | 70  |
| SMMPA11350 | 20 | 21 | 7  | 78  | 73  | 49  | 53  | 59  | 50  |
| SMMPA11351 | 29 | 32 | 25 | 318 | 352 | 324 | 136 | 217 | 166 |
| SMMPA11352 | 38 | 43 | 30 | 316 | 292 | 240 | 84  | 131 | 96  |
| SMMPA11353 | 47 | 44 | 35 | 397 | 350 | 252 | 173 | 185 | 192 |
| SMMPA11354 | 11 | 18 | 16 | 170 | 130 | 97  | 75  | 87  | 67  |
| SMMPA11355 | 11 | 13 | 13 | 99  | 71  | 67  | 44  | 67  | 57  |
| SMMPA11356 | 20 | 28 | 20 | 44  | 49  | 49  | 36  | 45  | 42  |
| SMMPA11357 | 26 | 30 | 32 | 90  | 73  | 48  | 47  | 77  | 68  |
| SMMPA11358 | 9  | 8  | 13 | 158 | 156 | 113 | 55  | 82  | 58  |
| SMMPA11359 | 21 | 18 | 23 | 135 | 119 | 90  | 73  | 88  | 63  |
| SMMPA11360 | 18 | 21 | 16 | 275 | 193 | 189 | 85  | 95  | 121 |

|            |    |    |    |      |     |     |     |     |     |
|------------|----|----|----|------|-----|-----|-----|-----|-----|
| SMMPA11361 | 12 | 11 | 9  | 255  | 227 | 201 | 163 | 168 | 195 |
| SMMPA11362 | 5  | 6  | 1  | 70   | 63  | 45  | 29  | 49  | 53  |
| SMMPA11363 | 8  | 24 | 11 | 128  | 110 | 96  | 52  | 65  | 51  |
| SMMPA11364 | 19 | 31 | 22 | 86   | 91  | 60  | 56  | 58  | 49  |
| SMMPA11365 | 15 | 13 | 14 | 127  | 110 | 75  | 49  | 61  | 56  |
| SMMPA11366 | 18 | 21 | 23 | 518  | 447 | 390 | 267 | 333 | 318 |
| SMMPA11367 | 13 | 14 | 17 | 228  | 182 | 128 | 103 | 117 | 107 |
| SMMPA11368 | 16 | 29 | 20 | 325  | 280 | 251 | 119 | 171 | 146 |
| SMMPA11369 | 14 | 21 | 18 | 20   | 30  | 41  | 17  | 23  | 26  |
| SMMPA11370 | 37 | 25 | 22 | 185  | 178 | 169 | 130 | 156 | 138 |
| SMMPA11371 | 15 | 11 | 7  | 53   | 35  | 51  | 25  | 33  | 30  |
| SMMPA11372 | 18 | 16 | 18 | 91   | 84  | 64  | 41  | 41  | 35  |
| SMMPA11373 | 4  | 13 | 6  | 64   | 71  | 54  | 41  | 47  | 43  |
| SMMPA11374 | 31 | 30 | 27 | 504  | 431 | 354 | 134 | 218 | 167 |
| SMMPA11375 | 17 | 23 | 13 | 81   | 78  | 67  | 46  | 66  | 44  |
| SMMPA11376 | 24 | 23 | 11 | 45   | 39  | 24  | 28  | 33  | 30  |
| SMMPA11377 | 32 | 26 | 27 | 88   | 78  | 73  | 50  | 60  | 62  |
| SMMPA11378 | 24 | 39 | 30 | 86   | 76  | 67  | 31  | 32  | 48  |
| SMMPA11379 | 16 | 22 | 16 | 29   | 21  | 25  | 20  | 24  | 18  |
| SMMPA11380 | 22 | 17 | 17 | 94   | 84  | 69  | 49  | 72  | 64  |
| SMMPA11381 | 14 | 14 | 9  | 43   | 25  | 35  | 15  | 29  | 19  |
| SMMPA11382 | 20 | 17 | 18 | 60   | 37  | 49  | 39  | 40  | 37  |
| SMMPA11383 | 22 | 35 | 17 | 79   | 76  | 68  | 61  | 69  | 60  |
| SMMPA11384 | 31 | 50 | 28 | 67   | 62  | 61  | 53  | 54  | 72  |
| SMMPA11385 | 14 | 26 | 14 | 102  | 89  | 65  | 48  | 68  | 63  |
| SMMPA11386 | 7  | 7  | 3  | 22   | 22  | 11  | 10  | 8   | 20  |
| SMMPA11387 | 22 | 25 | 23 | 263  | 215 | 164 | 119 | 169 | 115 |
| SMMPA11388 | 39 | 26 | 39 | 129  | 121 | 93  | 64  | 99  | 81  |
| SMMPA11389 | 23 | 27 | 24 | 241  | 196 | 144 | 67  | 126 | 94  |
| SMMPA11390 | 16 | 18 | 15 | 242  | 201 | 172 | 91  | 96  | 87  |
| SMMPA11391 | 16 | 12 | 11 | 229  | 175 | 136 | 88  | 101 | 78  |
| SMMPA11392 | 11 | 13 | 18 | 126  | 101 | 84  | 59  | 62  | 60  |
| SMMPA11393 | 13 | 21 | 12 | 154  | 126 | 111 | 54  | 64  | 76  |
| SMMPA11394 | 19 | 22 | 19 | 249  | 209 | 149 | 93  | 142 | 111 |
| SMMPA11395 | 23 | 21 | 17 | 326  | 257 | 211 | 156 | 210 | 165 |
| SMMPA11396 | 15 | 23 | 8  | 169  | 158 | 118 | 71  | 89  | 81  |
| SMMPA11397 | 6  | 12 | 10 | 243  | 203 | 183 | 146 | 177 | 153 |
| SMMPA11398 | 16 | 9  | 5  | 141  | 194 | 154 | 44  | 66  | 35  |
| SMMPA11399 | 20 | 22 | 21 | 167  | 173 | 169 | 77  | 125 | 88  |
| SMMPA11400 | 10 | 11 | 11 | 465  | 465 | 491 | 184 | 231 | 197 |
| SMMPA11401 | 35 | 27 | 41 | 1112 | 941 | 829 | 438 | 594 | 500 |

|            |    |    |    |     |     |     |     |     |     |
|------------|----|----|----|-----|-----|-----|-----|-----|-----|
| SMMPA11402 | 7  | 12 | 9  | 201 | 217 | 176 | 94  | 114 | 114 |
| SMMPA11403 | 20 | 17 | 24 | 435 | 393 | 322 | 218 | 317 | 257 |
| SMMPA11404 | 5  | 10 | 7  | 151 | 145 | 123 | 66  | 96  | 69  |
| SMMPA11405 | 5  | 4  | 4  | 90  | 93  | 104 | 26  | 35  | 28  |
| SMMPA11406 | 19 | 20 | 25 | 340 | 351 | 296 | 146 | 221 | 189 |
| SMMPA11407 | 17 | 15 | 11 | 49  | 68  | 33  | 39  | 49  | 41  |
| SMMPA11408 | 29 | 20 | 29 | 87  | 95  | 63  | 75  | 83  | 70  |
| SMMPA11409 | 15 | 14 | 10 | 172 | 170 | 136 | 80  | 112 | 110 |
| SMMPA11410 | 16 | 38 | 21 | 136 | 121 | 99  | 39  | 60  | 65  |
| SMMPA11411 | 25 | 33 | 24 | 146 | 127 | 111 | 74  | 84  | 96  |
| SMMPA11412 | 21 | 26 | 20 | 139 | 148 | 107 | 77  | 92  | 83  |
| SMMPA11413 | 24 | 37 | 29 | 108 | 95  | 68  | 55  | 109 | 82  |
| SMMPA11414 | 38 | 32 | 23 | 121 | 101 | 79  | 43  | 60  | 50  |
| SMMPA11415 | 9  | 11 | 12 | 40  | 32  | 22  | 12  | 17  | 24  |
| SMMPA11416 | 25 | 13 | 11 | 27  | 32  | 21  | 30  | 27  | 38  |
| SMMPA11417 | 21 | 23 | 19 | 41  | 38  | 31  | 29  | 28  | 39  |
| SMMPA11418 | 23 | 26 | 15 | 65  | 58  | 56  | 27  | 33  | 45  |
| SMMPA11419 | 31 | 25 | 23 | 72  | 50  | 39  | 32  | 41  | 36  |
| SMMPA11420 | 17 | 22 | 15 | 57  | 52  | 38  | 30  | 39  | 43  |
| SMMPA11421 | 34 | 39 | 16 | 55  | 51  | 43  | 39  | 40  | 33  |
| SMMPA11422 | 23 | 33 | 23 | 85  | 75  | 58  | 29  | 53  | 50  |
| SMMPA11423 | 13 | 17 | 19 | 80  | 66  | 53  | 44  | 49  | 49  |
| SMMPA11424 | 32 | 25 | 18 | 124 | 97  | 88  | 71  | 83  | 64  |
| SMMPA11425 | 54 | 45 | 48 | 105 | 105 | 77  | 54  | 70  | 55  |
| SMMPA11426 | 29 | 24 | 20 | 78  | 94  | 72  | 46  | 66  | 72  |
| SMMPA11427 | 5  | 16 | 2  | 76  | 68  | 46  | 30  | 37  | 35  |
| SMMPA11428 | 18 | 10 | 13 | 72  | 72  | 63  | 34  | 45  | 31  |
| SMMPA11429 | 12 | 10 | 6  | 45  | 33  | 24  | 19  | 19  | 25  |
| SMMPA11430 | 5  | 6  | 5  | 46  | 33  | 22  | 17  | 28  | 18  |
| SMMPA11431 | 20 | 26 | 15 | 73  | 68  | 57  | 79  | 97  | 73  |
| SMMPA11432 | 15 | 9  | 19 | 15  | 14  | 5   | 14  | 21  | 24  |
| SMMPA11433 | 17 | 29 | 23 | 70  | 53  | 36  | 44  | 41  | 36  |
| SMMPA11434 | 18 | 18 | 15 | 19  | 19  | 17  | 14  | 21  | 30  |
| SMMPA11435 | 86 | 76 | 52 | 78  | 71  | 69  | 80  | 119 | 105 |
| SMMPA11436 | 19 | 19 | 25 | 23  | 34  | 29  | 26  | 41  | 24  |
| SMMPA11437 | 25 | 20 | 20 | 40  | 29  | 26  | 25  | 35  | 32  |
| SMMPA11438 | 21 | 23 | 20 | 47  | 32  | 41  | 20  | 45  | 34  |
| SMMPA11439 | 21 | 15 | 13 | 64  | 55  | 47  | 27  | 42  | 51  |
| SMMPA11440 | 22 | 16 | 27 | 35  | 26  | 19  | 30  | 23  | 34  |
| SMMPA11441 | 17 | 19 | 19 | 24  | 25  | 22  | 30  | 36  | 21  |
| SMMPA11442 | 12 | 12 | 18 | 57  | 51  | 33  | 26  | 22  | 29  |



|            |    |    |    |     |     |     |     |     |     |
|------------|----|----|----|-----|-----|-----|-----|-----|-----|
| SMMPA11443 | 11 | 10 | 17 | 46  | 40  | 35  | 20  | 24  | 18  |
| SMMPA11444 | 17 | 19 | 8  | 60  | 53  | 43  | 38  | 36  | 48  |
| SMMPA11445 | 1  | 1  | 1  | 2   | 3   | 9   | 6   | 7   | 8   |
| SMMPA11446 | 12 | 11 | 15 | 26  | 33  | 35  | 16  | 21  | 19  |
| SMMPA11447 | 12 | 17 | 10 | 53  | 54  | 58  | 18  | 17  | 14  |
| SMMPA11448 | 1  | 1  | 3  | 16  | 13  | 11  | 4   | 5   | 7   |
| SMMPA11449 | 20 | 22 | 8  | 52  | 47  | 27  | 25  | 36  | 38  |
| SMMPA11450 | 9  | 14 | 10 | 40  | 41  | 26  | 14  | 35  | 34  |
| SMMPA11451 | 21 | 14 | 20 | 41  | 38  | 36  | 19  | 30  | 28  |
| SMMPA11452 | 8  | 11 | 6  | 27  | 30  | 15  | 10  | 21  | 22  |
| SMMPA11453 | 28 | 32 | 24 | 61  | 60  | 50  | 42  | 51  | 36  |
| SMMPA11454 | 36 | 27 | 22 | 101 | 91  | 63  | 83  | 97  | 79  |
| SMMPA11455 | 22 | 9  | 12 | 40  | 21  | 23  | 22  | 43  | 42  |
| SMMPA11456 | 13 | 12 | 10 | 23  | 29  | 19  | 19  | 31  | 24  |
| SMMPA11457 | 12 | 9  | 5  | 20  | 21  | 12  | 18  | 16  | 19  |
| SMMPA11458 | 17 | 24 | 20 | 34  | 29  | 35  | 34  | 42  | 34  |
| SMMPA11459 | 21 | 16 | 27 | 30  | 21  | 23  | 24  | 29  | 39  |
| SMMPA11460 | 18 | 26 | 16 | 43  | 40  | 37  | 24  | 37  | 33  |
| SMMPA11461 | 15 | 28 | 15 | 83  | 95  | 75  | 30  | 43  | 38  |
| SMMPA11462 | 7  | 12 | 6  | 82  | 78  | 70  | 28  | 25  | 25  |
| SMMPA11463 | 33 | 26 | 20 | 54  | 42  | 38  | 28  | 55  | 36  |
| SMMPA11464 | 15 | 16 | 25 | 38  | 47  | 36  | 32  | 39  | 30  |
| SMMPA11465 | 20 | 17 | 18 | 61  | 50  | 49  | 37  | 49  | 35  |
| SMMPA11466 | 8  | 10 | 11 | 73  | 64  | 56  | 22  | 46  | 31  |
| SMMPA11467 | 17 | 19 | 17 | 44  | 41  | 34  | 21  | 32  | 32  |
| SMMPA11468 | 14 | 16 | 11 | 44  | 28  | 28  | 10  | 32  | 22  |
| SMMPA11469 | 18 | 16 | 14 | 164 | 186 | 133 | 86  | 100 | 64  |
| SMMPA11470 | 27 | 31 | 26 | 505 | 481 | 368 | 335 | 483 | 437 |
| SMMPA11471 | 20 | 22 | 25 | 283 | 252 | 215 | 160 | 188 | 186 |
| SMMPA11472 | 37 | 38 | 35 | 511 | 486 | 379 | 260 | 330 | 290 |
| SMMPA11473 | 22 | 32 | 18 | 769 | 653 | 546 | 454 | 562 | 526 |
| SMMPA11474 | 14 | 12 | 8  | 544 | 457 | 413 | 189 | 251 | 208 |
| SMMPA11475 | 23 | 26 | 23 | 167 | 114 | 93  | 76  | 80  | 78  |
| SMMPA11476 | 26 | 24 | 8  | 519 | 459 | 400 | 307 | 446 | 372 |
| SMMPA11477 | 17 | 21 | 15 | 168 | 158 | 118 | 63  | 87  | 94  |
| SMMPA11478 | 12 | 15 | 21 | 457 | 395 | 334 | 207 | 281 | 263 |
| SMMPA11479 | 10 | 9  | 12 | 141 | 142 | 111 | 47  | 54  | 59  |
| SMMPA11480 | 25 | 29 | 29 | 682 | 612 | 502 | 455 | 672 | 474 |
| SMMPA11481 | 36 | 25 | 37 | 71  | 87  | 72  | 26  | 39  | 46  |
| SMMPA11482 | 4  | 4  | 7  | 6   | 10  | 9   | 3   | 7   | 5   |
| SMMPA11483 | 30 | 38 | 28 | 122 | 102 | 89  | 38  | 50  | 52  |

|            |    |    |    |     |     |     |     |     |     |
|------------|----|----|----|-----|-----|-----|-----|-----|-----|
| SMMPA11484 | 26 | 23 | 19 | 34  | 41  | 32  | 13  | 34  | 36  |
| SMMPA11485 | 26 | 24 | 20 | 421 | 328 | 280 | 139 | 175 | 173 |
| SMMPA11486 | 12 | 20 | 16 | 40  | 30  | 24  | 19  | 22  | 24  |
| SMMPA11487 | 35 | 46 | 38 | 150 | 119 | 116 | 69  | 73  | 71  |
| SMMPA11488 | 70 | 64 | 55 | 124 | 105 | 84  | 63  | 105 | 97  |
| SMMPA11489 | 21 | 19 | 16 | 234 | 198 | 154 | 102 | 109 | 114 |
| SMMPA11490 | 10 | 8  | 6  | 13  | 12  | 11  | 15  | 12  | 17  |
| SMMPA11491 | 10 | 13 | 13 | 37  | 42  | 31  | 12  | 24  | 29  |
| SMMPA11492 | 28 | 36 | 29 | 65  | 64  | 60  | 65  | 66  | 61  |
| SMMPA11493 | 32 | 24 | 21 | 330 | 295 | 238 | 156 | 183 | 188 |
| SMMPA11494 | 16 | 17 | 14 | 116 | 94  | 85  | 105 | 113 | 109 |
| SMMPA11495 | 34 | 33 | 30 | 94  | 110 | 76  | 49  | 64  | 66  |
| SMMPA11496 | 22 | 31 | 18 | 60  | 55  | 53  | 34  | 52  | 43  |
| SMMPA11497 | 6  | 11 | 3  | 12  | 19  | 6   | 7   | 9   | 15  |
| SMMPA11498 | 10 | 9  | 10 | 167 | 147 | 118 | 77  | 104 | 89  |
| SMMPA11499 | 30 | 23 | 29 | 126 | 103 | 89  | 46  | 60  | 75  |
| SMMPA11500 | 30 | 20 | 23 | 66  | 64  | 72  | 37  | 69  | 43  |
| SMMPA11501 | 30 | 35 | 27 | 207 | 171 | 154 | 92  | 124 | 126 |
| SMMPA11502 | 49 | 55 | 46 | 182 | 160 | 126 | 132 | 152 | 163 |
| SMMPA11503 | 17 | 26 | 17 | 116 | 104 | 88  | 61  | 92  | 62  |
| SMMPA11504 | 31 | 33 | 25 | 493 | 463 | 385 | 205 | 268 | 254 |
| SMMPA11505 | 33 | 37 | 22 | 77  | 58  | 48  | 60  | 71  | 63  |
| SMMPA11506 | 22 | 15 | 14 | 34  | 26  | 27  | 36  | 38  | 38  |
| SMMPA11507 | 48 | 34 | 36 | 109 | 93  | 70  | 87  | 105 | 99  |
| SMMPA11508 | 27 | 19 | 25 | 35  | 25  | 23  | 45  | 64  | 43  |
| SMMPA11509 | 28 | 20 | 22 | 61  | 55  | 44  | 42  | 59  | 60  |
| SMMPA11510 | 31 | 35 | 28 | 55  | 47  | 39  | 41  | 56  | 37  |
| SMMPA11511 | 40 | 37 | 29 | 74  | 80  | 61  | 50  | 47  | 61  |
| SMMPA11512 | 33 | 37 | 33 | 160 | 120 | 82  | 79  | 111 | 104 |
| SMMPA11513 | 23 | 28 | 18 | 41  | 36  | 25  | 45  | 41  | 46  |
| SMMPA11514 | 5  | 5  | 8  | 12  | 10  | 10  | 7   | 11  | 7   |
| SMMPA11515 | 27 | 34 | 25 | 232 | 189 | 165 | 98  | 126 | 138 |
| SMMPA11516 | 44 | 40 | 45 | 274 | 270 | 224 | 75  | 102 | 95  |
| SMMPA11517 | 28 | 29 | 30 | 956 | 865 | 800 | 257 | 299 | 287 |
| SMMPA11518 | 16 | 13 | 14 | 10  | 14  | 7   | 14  | 18  | 20  |
| SMMPA11519 | 10 | 12 | 13 | 14  | 15  | 14  | 17  | 14  | 19  |
| SMMPA11520 | 9  | 11 | 7  | 8   | 15  | 16  | 15  | 14  | 21  |
| SMMPA11521 | 18 | 23 | 25 | 34  | 20  | 23  | 29  | 22  | 24  |
| SMMPA11522 | 21 | 35 | 17 | 59  | 68  | 55  | 34  | 33  | 55  |
| SMMPA11523 | 19 | 25 | 16 | 31  | 26  | 30  | 28  | 34  | 30  |
| SMMPA11524 | 14 | 17 | 17 | 31  | 27  | 17  | 16  | 21  | 28  |

|            |    |    |    |     |     |     |     |     |     |
|------------|----|----|----|-----|-----|-----|-----|-----|-----|
| SMMPA11525 | 13 | 11 | 13 | 16  | 21  | 15  | 7   | 15  | 14  |
| SMMPA11526 | 15 | 20 | 8  | 14  | 16  | 24  | 17  | 22  | 21  |
| SMMPA11527 | 19 | 20 | 14 | 28  | 25  | 15  | 19  | 21  | 24  |
| SMMPA11528 | 8  | 10 | 12 | 12  | 15  | 19  | 21  | 31  | 22  |
| SMMPA11529 | 22 | 21 | 19 | 103 | 96  | 64  | 23  | 40  | 25  |
| SMMPA11530 | 19 | 28 | 20 | 214 | 201 | 150 | 87  | 95  | 107 |
| SMMPA11531 | 29 | 35 | 33 | 128 | 124 | 96  | 75  | 101 | 88  |
| SMMPA11532 | 3  | 9  | 2  | 39  | 19  | 24  | 6   | 8   | 9   |
| SMMPA11533 | 15 | 14 | 14 | 112 | 96  | 69  | 30  | 45  | 52  |
| SMMPA11534 | 13 | 21 | 12 | 94  | 76  | 61  | 57  | 56  | 72  |
| SMMPA11535 | 7  | 16 | 8  | 92  | 100 | 59  | 36  | 44  | 57  |
| SMMPA11536 | 18 | 16 | 21 | 213 | 215 | 154 | 111 | 129 | 118 |
| SMMPA11537 | 23 | 31 | 16 | 275 | 206 | 180 | 105 | 121 | 112 |
| SMMPA11538 | 23 | 30 | 17 | 96  | 52  | 48  | 51  | 59  | 53  |
| SMMPA11539 | 15 | 14 | 14 | 314 | 288 | 232 | 144 | 173 | 176 |
| SMMPA11540 | 14 | 12 | 14 | 25  | 41  | 35  | 26  | 27  | 25  |
| SMMPA11541 | 3  | 2  | 3  | 14  | 9   | 5   | 10  | 10  | 8   |
| SMMPA11542 | 37 | 39 | 18 | 191 | 212 | 136 | 101 | 139 | 131 |
| SMMPA11543 | 40 | 34 | 40 | 168 | 154 | 115 | 111 | 128 | 108 |
| SMMPA11544 | 28 | 34 | 24 | 111 | 112 | 78  | 56  | 65  | 66  |
| SMMPA11545 | 26 | 34 | 22 | 83  | 95  | 71  | 68  | 87  | 87  |
| SMMPA11546 | 29 | 26 | 16 | 88  | 87  | 51  | 48  | 59  | 51  |
| SMMPA11547 | 50 | 39 | 44 | 276 | 234 | 199 | 138 | 198 | 187 |
| SMMPA11548 | 27 | 29 | 23 | 147 | 135 | 120 | 94  | 123 | 124 |
| SMMPA11549 | 38 | 39 | 36 | 150 | 127 | 100 | 117 | 156 | 146 |
| SMMPA11550 | 10 | 15 | 7  | 9   | 11  | 16  | 10  | 9   | 15  |
| SMMPA11551 | 15 | 12 | 16 | 40  | 36  | 27  | 21  | 17  | 17  |
| SMMPA11552 | 17 | 21 | 22 | 39  | 39  | 37  | 23  | 31  | 28  |
| SMMPA11553 | 28 | 32 | 23 | 92  | 90  | 67  | 70  | 93  | 71  |
| SMMPA11554 | 20 | 27 | 26 | 217 | 159 | 132 | 67  | 75  | 81  |
| SMMPA11555 | 44 | 24 | 30 | 182 | 147 | 125 | 59  | 78  | 69  |
| SMMPA11556 | 30 | 27 | 28 | 107 | 115 | 96  | 42  | 59  | 54  |
| SMMPA11557 | 17 | 10 | 6  | 24  | 17  | 16  | 23  | 26  | 18  |
| SMMPA11558 | 24 | 21 | 17 | 105 | 62  | 95  | 61  | 72  | 65  |
| SMMPA11559 | 37 | 37 | 33 | 261 | 278 | 192 | 98  | 106 | 103 |
| SMMPA11560 | 5  | 15 | 16 | 124 | 127 | 103 | 63  | 81  | 76  |
| SMMPA11561 | 40 | 38 | 26 | 325 | 330 | 276 | 184 | 238 | 248 |
| SMMPA11562 | 11 | 25 | 15 | 123 | 118 | 72  | 65  | 88  | 84  |
| SMMPA11563 | 16 | 26 | 26 | 258 | 238 | 191 | 94  | 122 | 104 |
| SMMPA11564 | 14 | 24 | 38 | 135 | 126 | 101 | 47  | 69  | 71  |
| SMMPA11565 | 32 | 19 | 25 | 440 | 403 | 358 | 168 | 228 | 223 |

|            |    |    |    |     |     |     |     |     |     |
|------------|----|----|----|-----|-----|-----|-----|-----|-----|
| SMMPA11566 | 3  | 9  | 10 | 13  | 7   | 14  | 6   | 11  | 10  |
| SMMPA11567 | 26 | 34 | 49 | 321 | 321 | 234 | 142 | 171 | 175 |
| SMMPA11568 | 8  | 6  | 12 | 37  | 43  | 35  | 21  | 22  | 21  |
| SMMPA11569 | 15 | 23 | 23 | 122 | 103 | 92  | 53  | 83  | 56  |
| SMMPA11570 | 3  | 4  | 1  | 28  | 23  | 25  | 19  | 26  | 22  |
| SMMPA11571 | 17 | 17 | 23 | 53  | 55  | 51  | 44  | 59  | 68  |
| SMMPA11572 | 15 | 15 | 14 | 68  | 40  | 36  | 40  | 37  | 54  |
| SMMPA11573 | 19 | 25 | 26 | 63  | 70  | 55  | 42  | 45  | 50  |
| SMMPA11574 | 23 | 27 | 25 | 110 | 89  | 74  | 32  | 54  | 54  |
| SMMPA11575 | 27 | 18 | 22 | 207 | 181 | 148 | 88  | 110 | 88  |
| SMMPA11576 | 24 | 26 | 26 | 139 | 123 | 108 | 60  | 89  | 87  |
| SMMPA11577 | 24 | 33 | 23 | 53  | 74  | 52  | 56  | 68  | 72  |
| SMMPA11578 | 37 | 33 | 35 | 40  | 47  | 36  | 61  | 74  | 75  |
| SMMPA11579 | 52 | 26 | 32 | 47  | 47  | 45  | 50  | 67  | 79  |
| SMMPA11580 | 17 | 29 | 14 | 36  | 35  | 34  | 29  | 37  | 45  |
| SMMPA11581 | 27 | 38 | 29 | 66  | 54  | 42  | 50  | 63  | 62  |
| SMMPA11582 | 48 | 55 | 37 | 63  | 67  | 46  | 51  | 66  | 70  |
| SMMPA11583 | 25 | 29 | 25 | 62  | 56  | 49  | 25  | 46  | 52  |
| SMMPA11584 | 11 | 15 | 16 | 20  | 25  | 20  | 23  | 34  | 39  |
| SMMPA11585 | 16 | 14 | 17 | 93  | 62  | 46  | 26  | 31  | 41  |
| SMMPA11586 | 31 | 28 | 30 | 156 | 136 | 125 | 74  | 109 | 77  |
| SMMPA11587 | 0  | 0  | 1  | 1   | 1   | 5   | 2   | 8   | 4   |
| SMMPA11588 | 3  | 9  | 3  | 50  | 36  | 43  | 29  | 30  | 20  |
| SMMPA11589 | 8  | 6  | 2  | 35  | 37  | 27  | 18  | 20  | 15  |
| SMMPA11590 | 16 | 32 | 21 | 74  | 55  | 43  | 35  | 44  | 45  |
| SMMPA11591 | 23 | 27 | 11 | 48  | 44  | 37  | 32  | 36  | 37  |
| SMMPA11592 | 28 | 21 | 21 | 178 | 138 | 130 | 79  | 85  | 80  |
| SMMPA11593 | 4  | 6  | 9  | 32  | 28  | 26  | 12  | 17  | 13  |
| SMMPA11594 | 8  | 4  | 5  | 50  | 30  | 35  | 21  | 16  | 19  |
| SMMPA11595 | 14 | 13 | 13 | 147 | 121 | 105 | 42  | 50  | 54  |
| SMMPA11596 | 15 | 11 | 19 | 162 | 152 | 130 | 94  | 120 | 108 |
| SMMPA11597 | 15 | 22 | 10 | 38  | 41  | 30  | 31  | 56  | 52  |
| SMMPA11598 | 20 | 19 | 20 | 85  | 62  | 42  | 29  | 49  | 46  |
| SMMPA11599 | 30 | 20 | 23 | 63  | 42  | 29  | 35  | 38  | 35  |
| SMMPA11600 | 30 | 49 | 30 | 42  | 37  | 38  | 40  | 47  | 43  |
| SMMPA11601 | 17 | 31 | 14 | 281 | 238 | 194 | 123 | 163 | 134 |
| SMMPA11602 | 19 | 14 | 14 | 311 | 350 | 223 | 188 | 233 | 222 |
| SMMPA11603 | 11 | 19 | 11 | 83  | 55  | 54  | 50  | 32  | 38  |
| SMMPA11604 | 25 | 19 | 16 | 65  | 67  | 50  | 37  | 45  | 46  |
| SMMPA11605 | 31 | 33 | 22 | 60  | 61  | 50  | 52  | 56  | 45  |
| SMMPA11606 | 25 | 29 | 22 | 112 | 109 | 83  | 41  | 55  | 45  |

|            |    |    |    |     |     |     |     |     |     |
|------------|----|----|----|-----|-----|-----|-----|-----|-----|
| SMMPA11607 | 19 | 19 | 11 | 32  | 24  | 26  | 8   | 18  | 25  |
| SMMPA11608 | 44 | 40 | 34 | 67  | 79  | 67  | 30  | 47  | 52  |
| SMMPA11609 | 15 | 13 | 18 | 260 | 231 | 207 | 145 | 199 | 145 |
| SMMPA11610 | 6  | 10 | 11 | 151 | 123 | 99  | 41  | 70  | 77  |
| SMMPA11611 | 24 | 23 | 28 | 440 | 376 | 304 | 290 | 364 | 336 |
| SMMPA11612 | 40 | 41 | 38 | 76  | 76  | 61  | 70  | 105 | 104 |
| SMMPA11613 | 9  | 7  | 6  | 100 | 71  | 87  | 35  | 37  | 28  |
| SMMPA11614 | 21 | 24 | 18 | 94  | 83  | 68  | 49  | 89  | 63  |
| SMMPA11615 | 32 | 33 | 34 | 226 | 159 | 132 | 145 | 171 | 178 |
| SMMPA11616 | 38 | 31 | 24 | 133 | 113 | 71  | 75  | 85  | 83  |
| SMMPA11617 | 25 | 17 | 15 | 130 | 105 | 95  | 60  | 77  | 77  |
| SMMPA11618 | 22 | 9  | 12 | 107 | 101 | 91  | 45  | 57  | 47  |
| SMMPA11619 | 31 | 28 | 30 | 114 | 122 | 74  | 62  | 97  | 66  |
| SMMPA11620 | 17 | 16 | 16 | 51  | 45  | 33  | 34  | 48  | 55  |
| SMMPA11621 | 14 | 9  | 15 | 33  | 35  | 23  | 26  | 27  | 30  |
| SMMPA11622 | 31 | 16 | 19 | 36  | 48  | 41  | 30  | 41  | 38  |
| SMMPA11623 | 19 | 11 | 21 | 88  | 82  | 64  | 64  | 55  | 82  |
| SMMPA11624 | 9  | 8  | 15 | 37  | 31  | 26  | 22  | 26  | 25  |
| SMMPA11625 | 14 | 23 | 11 | 57  | 46  | 39  | 32  | 38  | 44  |
| SMMPA11626 | 4  | 17 | 7  | 6   | 8   | 9   | 7   | 7   | 12  |
| SMMPA11627 | 22 | 26 | 19 | 29  | 29  | 18  | 20  | 33  | 29  |
| SMMPA11628 | 11 | 15 | 6  | 13  | 16  | 22  | 11  | 19  | 11  |
| SMMPA11629 | 15 | 11 | 8  | 22  | 10  | 8   | 14  | 20  | 25  |
| SMMPA11630 | 44 | 32 | 24 | 72  | 57  | 52  | 44  | 45  | 48  |
| SMMPA11631 | 10 | 18 | 13 | 34  | 32  | 24  | 21  | 27  | 34  |
| SMMPA11632 | 32 | 50 | 46 | 39  | 46  | 37  | 48  | 54  | 45  |
| SMMPA11633 | 36 | 43 | 40 | 41  | 30  | 30  | 33  | 41  | 45  |
| SMMPA11634 | 9  | 16 | 13 | 21  | 36  | 18  | 16  | 28  | 17  |
| SMMPA11635 | 4  | 5  | 5  | 12  | 7   | 8   | 4   | 12  | 9   |
| SMMPA11636 | 12 | 14 | 19 | 28  | 27  | 19  | 14  | 17  | 13  |
| SMMPA11637 | 15 | 19 | 14 | 24  | 35  | 29  | 23  | 24  | 36  |
| SMMPA11638 | 19 | 36 | 18 | 37  | 35  | 24  | 22  | 39  | 22  |
| SMMPA11639 | 20 | 18 | 17 | 28  | 35  | 23  | 19  | 20  | 26  |
| SMMPA11640 | 31 | 21 | 15 | 51  | 33  | 28  | 37  | 46  | 44  |
| SMMPA11641 | 11 | 5  | 5  | 13  | 26  | 15  | 11  | 14  | 16  |
| SMMPA11642 | 9  | 25 | 16 | 38  | 29  | 20  | 18  | 26  | 35  |
| SMMPA11643 | 18 | 26 | 19 | 30  | 26  | 25  | 30  | 29  | 24  |
| SMMPA11644 | 13 | 11 | 15 | 49  | 54  | 51  | 21  | 31  | 22  |
| SMMPA11645 | 29 | 24 | 21 | 99  | 89  | 76  | 45  | 63  | 78  |
| SMMPA11646 | 30 | 27 | 28 | 36  | 26  | 29  | 28  | 48  | 39  |
| SMMPA11647 | 5  | 8  | 6  | 27  | 23  | 8   | 20  | 21  | 11  |

|            |    |    |    |     |     |     |     |     |     |
|------------|----|----|----|-----|-----|-----|-----|-----|-----|
| SMMPA11648 | 18 | 15 | 26 | 82  | 73  | 65  | 50  | 100 | 79  |
| SMMPA11649 | 39 | 33 | 29 | 45  | 26  | 39  | 24  | 41  | 41  |
| SMMPA11650 | 18 | 19 | 22 | 92  | 80  | 57  | 69  | 80  | 68  |
| SMMPA11651 | 24 | 22 | 23 | 34  | 29  | 32  | 37  | 64  | 43  |
| SMMPA11652 | 22 | 20 | 10 | 316 | 306 | 290 | 156 | 217 | 165 |
| SMMPA11653 | 25 | 6  | 18 | 125 | 112 | 92  | 72  | 95  | 64  |
| SMMPA11654 | 19 | 31 | 23 | 200 | 216 | 187 | 97  | 125 | 132 |
| SMMPA11655 | 22 | 29 | 26 | 110 | 84  | 68  | 48  | 97  | 85  |
| SMMPA11656 | 41 | 36 | 26 | 90  | 78  | 62  | 41  | 47  | 58  |
| SMMPA11657 | 26 | 26 | 18 | 57  | 65  | 39  | 52  | 59  | 79  |
| SMMPA11658 | 68 | 74 | 42 | 131 | 117 | 101 | 83  | 94  | 88  |
| SMMPA11659 | 22 | 30 | 20 | 41  | 47  | 48  | 45  | 43  | 35  |
| SMMPA11660 | 22 | 19 | 19 | 117 | 91  | 85  | 31  | 42  | 34  |
| SMMPA11661 | 13 | 17 | 12 | 53  | 59  | 33  | 29  | 41  | 40  |
| SMMPA11662 | 16 | 19 | 17 | 57  | 49  | 41  | 36  | 24  | 25  |
| SMMPA11663 | 22 | 17 | 27 | 70  | 53  | 61  | 41  | 44  | 48  |
| SMMPA11664 | 16 | 9  | 27 | 64  | 56  | 50  | 47  | 64  | 74  |
| SMMPA11665 | 22 | 30 | 27 | 74  | 70  | 62  | 39  | 50  | 66  |
| SMMPA11666 | 17 | 19 | 20 | 33  | 49  | 32  | 27  | 40  | 29  |
| SMMPA11667 | 16 | 23 | 22 | 25  | 31  | 28  | 25  | 25  | 23  |
| SMMPA11668 | 36 | 44 | 37 | 107 | 91  | 76  | 91  | 94  | 101 |
| SMMPA11669 | 27 | 27 | 18 | 73  | 61  | 57  | 55  | 68  | 61  |
| SMMPA11670 | 33 | 36 | 29 | 25  | 32  | 27  | 28  | 48  | 36  |
| SMMPA11671 | 22 | 28 | 30 | 76  | 74  | 50  | 46  | 58  | 53  |
| SMMPA11672 | 51 | 49 | 54 | 75  | 71  | 71  | 49  | 74  | 82  |
| SMMPA11673 | 24 | 29 | 18 | 81  | 84  | 69  | 42  | 43  | 48  |
| SMMPA11674 | 11 | 10 | 12 | 122 | 130 | 82  | 40  | 52  | 51  |
| SMMPA11675 | 23 | 16 | 15 | 107 | 90  | 72  | 51  | 56  | 72  |
| SMMPA11676 | 3  | 5  | 3  | 6   | 7   | 9   | 6   | 7   | 6   |
| SMMPA11677 | 20 | 16 | 11 | 26  | 22  | 20  | 18  | 36  | 23  |
| SMMPA11678 | 16 | 18 | 17 | 67  | 66  | 50  | 41  | 47  | 58  |
| SMMPA11679 | 18 | 16 | 18 | 112 | 96  | 92  | 57  | 97  | 72  |
| SMMPA11680 | 29 | 25 | 32 | 54  | 59  | 54  | 31  | 57  | 55  |
| SMMPA11681 | 66 | 59 | 51 | 34  | 23  | 23  | 47  | 61  | 46  |
| SMMPA11682 | 9  | 7  | 11 | 8   | 6   | 5   | 9   | 12  | 10  |
| SMMPA11683 | 39 | 46 | 32 | 109 | 81  | 71  | 52  | 70  | 54  |
| SMMPA11684 | 20 | 24 | 22 | 23  | 23  | 21  | 18  | 26  | 20  |
| SMMPA11685 | 47 | 49 | 35 | 26  | 20  | 27  | 44  | 30  | 44  |
| SMMPA11686 | 11 | 19 | 17 | 36  | 31  | 36  | 28  | 44  | 32  |
| SMMPA11687 | 12 | 20 | 20 | 28  | 22  | 38  | 35  | 41  | 40  |
| SMMPA11688 | 19 | 28 | 17 | 117 | 90  | 77  | 47  | 80  | 61  |

|            |    |    |    |     |     |     |    |     |     |
|------------|----|----|----|-----|-----|-----|----|-----|-----|
| SMMPA11689 | 10 | 14 | 11 | 35  | 27  | 23  | 17 | 27  | 25  |
| SMMPA11690 | 13 | 21 | 12 | 131 | 116 | 87  | 46 | 80  | 66  |
| SMMPA11691 | 21 | 25 | 18 | 86  | 75  | 56  | 58 | 69  | 64  |
| SMMPA11692 | 4  | 8  | 12 | 9   | 13  | 7   | 14 | 18  | 23  |
| SMMPA11693 | 20 | 30 | 20 | 94  | 73  | 53  | 38 | 48  | 49  |
| SMMPA11694 | 20 | 15 | 15 | 36  | 22  | 34  | 22 | 32  | 29  |
| SMMPA11695 | 18 | 22 | 22 | 53  | 51  | 29  | 42 | 50  | 30  |
| SMMPA11696 | 9  | 16 | 10 | 287 | 240 | 201 | 72 | 99  | 71  |
| SMMPA11697 | 38 | 32 | 27 | 114 | 73  | 84  | 36 | 56  | 48  |
| SMMPA11698 | 49 | 37 | 31 | 67  | 50  | 55  | 37 | 61  | 52  |
| SMMPA11699 | 9  | 10 | 7  | 12  | 17  | 13  | 17 | 20  | 18  |
| SMMPA11700 | 17 | 24 | 15 | 106 | 110 | 97  | 54 | 73  | 75  |
| SMMPA11701 | 2  | 2  | 6  | 25  | 24  | 16  | 9  | 18  | 13  |
| SMMPA11702 | 15 | 7  | 14 | 51  | 43  | 49  | 30 | 38  | 24  |
| SMMPA11703 | 37 | 34 | 41 | 111 | 101 | 97  | 95 | 116 | 125 |
| SMMPA11704 | 12 | 20 | 19 | 93  | 120 | 88  | 59 | 83  | 56  |
| SMMPA11705 | 15 | 25 | 9  | 36  | 25  | 19  | 23 | 31  | 22  |
| SMMPA11706 | 42 | 36 | 29 | 46  | 43  | 31  | 36 | 54  | 50  |
| SMMPA11707 | 14 | 13 | 8  | 30  | 32  | 26  | 19 | 30  | 31  |
| SMMPA11708 | 28 | 15 | 20 | 24  | 23  | 14  | 37 | 28  | 25  |
| SMMPA11709 | 16 | 11 | 18 | 36  | 33  | 34  | 18 | 45  | 25  |
| SMMPA11710 | 32 | 40 | 23 | 76  | 59  | 76  | 49 | 60  | 64  |
| SMMPA11711 | 14 | 22 | 18 | 34  | 31  | 35  | 34 | 36  | 38  |
| SMMPA11712 | 11 | 18 | 15 | 48  | 71  | 33  | 53 | 52  | 46  |
| SMMPA11713 | 22 | 23 | 24 | 33  | 35  | 30  | 15 | 28  | 17  |
| SMMPA11714 | 24 | 31 | 22 | 131 | 131 | 99  | 74 | 75  | 69  |
| SMMPA11715 | 8  | 20 | 15 | 94  | 107 | 82  | 30 | 43  | 41  |
| SMMPA11716 | 6  | 13 | 6  | 46  | 43  | 34  | 11 | 17  | 20  |
| SMMPA11717 | 23 | 25 | 27 | 133 | 124 | 94  | 42 | 51  | 51  |
| SMMPA11718 | 20 | 21 | 20 | 97  | 78  | 77  | 45 | 60  | 44  |
| SMMPA11719 | 12 | 14 | 10 | 54  | 35  | 43  | 16 | 23  | 14  |
| SMMPA11720 | 15 | 16 | 16 | 105 | 74  | 63  | 30 | 30  | 33  |
| SMMPA11721 | 25 | 29 | 24 | 155 | 134 | 102 | 42 | 74  | 59  |
| SMMPA11722 | 7  | 3  | 10 | 8   | 16  | 4   | 8  | 8   | 10  |
| SMMPA11723 | 19 | 11 | 11 | 158 | 145 | 119 | 51 | 92  | 67  |
| SMMPA11724 | 28 | 24 | 21 | 142 | 127 | 124 | 75 | 83  | 72  |
| SMMPA11725 | 24 | 16 | 7  | 49  | 62  | 43  | 35 | 50  | 52  |
| SMMPA11726 | 62 | 85 | 92 | 70  | 57  | 60  | 62 | 87  | 76  |
| SMMPA11727 | 19 | 22 | 16 | 34  | 47  | 32  | 27 | 31  | 32  |
| SMMPA11728 | 10 | 10 | 9  | 33  | 29  | 22  | 18 | 14  | 21  |
| SMMPA11729 | 26 | 18 | 26 | 256 | 217 | 167 | 60 | 74  | 92  |

|            |    |    |    |     |     |     |     |     |     |
|------------|----|----|----|-----|-----|-----|-----|-----|-----|
| SMMPA11730 | 24 | 17 | 14 | 68  | 45  | 44  | 40  | 29  | 30  |
| SMMPA11731 | 15 | 17 | 15 | 93  | 100 | 68  | 35  | 46  | 37  |
| SMMPA11732 | 15 | 25 | 18 | 174 | 153 | 111 | 52  | 61  | 54  |
| SMMPA11733 | 17 | 24 | 10 | 44  | 40  | 35  | 26  | 26  | 15  |
| SMMPA11734 | 14 | 16 | 9  | 134 | 135 | 76  | 42  | 79  | 44  |
| SMMPA11735 | 16 | 13 | 7  | 53  | 46  | 45  | 20  | 30  | 30  |
| SMMPA11736 | 25 | 14 | 18 | 41  | 56  | 43  | 34  | 53  | 48  |
| SMMPA11737 | 32 | 40 | 17 | 141 | 89  | 67  | 63  | 89  | 88  |
| SMMPA11738 | 49 | 38 | 33 | 84  | 94  | 70  | 59  | 115 | 59  |
| SMMPA11739 | 36 | 38 | 41 | 154 | 152 | 109 | 75  | 112 | 88  |
| SMMPA11740 | 27 | 23 | 16 | 153 | 125 | 105 | 98  | 95  | 99  |
| SMMPA11741 | 8  | 13 | 14 | 19  | 13  | 16  | 7   | 9   | 16  |
| SMMPA11742 | 27 | 27 | 16 | 192 | 158 | 146 | 78  | 113 | 97  |
| SMMPA11743 | 27 | 32 | 18 | 176 | 131 | 137 | 52  | 81  | 79  |
| SMMPA11744 | 11 | 13 | 18 | 103 | 104 | 91  | 39  | 39  | 51  |
| SMMPA11745 | 10 | 17 | 10 | 22  | 12  | 28  | 5   | 14  | 7   |
| SMMPA11746 | 6  | 6  | 7  | 12  | 18  | 21  | 7   | 8   | 4   |
| SMMPA11747 | 34 | 35 | 36 | 42  | 55  | 33  | 36  | 50  | 41  |
| SMMPA11748 | 13 | 16 | 12 | 24  | 32  | 23  | 11  | 12  | 6   |
| SMMPA11749 | 3  | 8  | 9  | 11  | 10  | 11  | 4   | 4   | 8   |
| SMMPA11750 | 14 | 17 | 14 | 21  | 21  | 24  | 8   | 15  | 7   |
| SMMPA11751 | 10 | 8  | 10 | 23  | 20  | 29  | 15  | 11  | 15  |
| SMMPA11752 | 9  | 16 | 16 | 13  | 11  | 17  | 9   | 12  | 10  |
| SMMPA11753 | 11 | 11 | 8  | 24  | 25  | 33  | 9   | 15  | 12  |
| SMMPA11754 | 14 | 14 | 15 | 26  | 16  | 20  | 16  | 11  | 18  |
| SMMPA11755 | 13 | 13 | 9  | 42  | 19  | 26  | 24  | 22  | 23  |
| SMMPA11756 | 25 | 25 | 28 | 342 | 329 | 268 | 199 | 281 | 279 |
| SMMPA11757 | 25 | 24 | 27 | 216 | 175 | 149 | 90  | 115 | 112 |
| SMMPA11758 | 18 | 19 | 18 | 35  | 33  | 27  | 22  | 33  | 30  |
| SMMPA11759 | 19 | 15 | 17 | 19  | 19  | 13  | 12  | 19  | 13  |
| SMMPA11760 | 17 | 20 | 23 | 31  | 28  | 18  | 21  | 22  | 27  |
| SMMPA11761 | 46 | 59 | 38 | 220 | 212 | 168 | 135 | 173 | 185 |
| SMMPA11762 | 24 | 16 | 20 | 37  | 47  | 34  | 24  | 40  | 43  |
| SMMPA11763 | 26 | 23 | 22 | 179 | 133 | 125 | 65  | 76  | 80  |
| SMMPA11764 | 31 | 28 | 20 | 48  | 46  | 47  | 55  | 52  | 56  |
| SMMPA11765 | 23 | 23 | 18 | 42  | 52  | 40  | 36  | 52  | 25  |
| SMMPA11766 | 14 | 19 | 11 | 70  | 58  | 56  | 32  | 52  | 47  |
| SMMPA11767 | 38 | 34 | 34 | 62  | 53  | 48  | 46  | 75  | 72  |
| SMMPA11768 | 30 | 20 | 25 | 27  | 19  | 18  | 18  | 18  | 26  |
| SMMPA11769 | 26 | 32 | 18 | 32  | 34  | 20  | 28  | 32  | 29  |
| SMMPA11770 | 18 | 24 | 26 | 29  | 26  | 31  | 26  | 36  | 35  |



|            |    |    |    |     |     |     |     |     |     |
|------------|----|----|----|-----|-----|-----|-----|-----|-----|
| SMMPA11771 | 15 | 14 | 15 | 24  | 16  | 24  | 26  | 28  | 26  |
| SMMPA11772 | 49 | 45 | 49 | 153 | 163 | 133 | 89  | 98  | 100 |
| SMMPA11773 | 22 | 22 | 19 | 37  | 33  | 28  | 22  | 34  | 32  |
| SMMPA11774 | 21 | 24 | 37 | 75  | 54  | 56  | 46  | 58  | 57  |
| SMMPA11775 | 17 | 31 | 22 | 126 | 102 | 79  | 47  | 42  | 54  |
| SMMPA11776 | 17 | 17 | 14 | 96  | 69  | 63  | 35  | 60  | 67  |
| SMMPA11777 | 32 | 37 | 34 | 221 | 182 | 140 | 75  | 124 | 137 |
| SMMPA11778 | 20 | 22 | 31 | 201 | 199 | 154 | 74  | 86  | 98  |
| SMMPA11779 | 31 | 29 | 29 | 134 | 110 | 78  | 51  | 78  | 56  |
| SMMPA11780 | 25 | 23 | 29 | 38  | 39  | 46  | 23  | 30  | 26  |
| SMMPA11781 | 22 | 30 | 18 | 34  | 33  | 29  | 35  | 34  | 43  |
| SMMPA11782 | 20 | 13 | 9  | 41  | 33  | 28  | 25  | 31  | 30  |
| SMMPA11783 | 29 | 24 | 25 | 93  | 96  | 84  | 51  | 65  | 40  |
| SMMPA11784 | 18 | 24 | 12 | 79  | 76  | 62  | 40  | 43  | 44  |
| SMMPA11785 | 17 | 11 | 11 | 26  | 15  | 23  | 13  | 18  | 23  |
| SMMPA11786 | 22 | 29 | 13 | 44  | 44  | 30  | 30  | 42  | 31  |
| SMMPA11787 | 26 | 26 | 26 | 37  | 43  | 41  | 32  | 36  | 42  |
| SMMPA11788 | 69 | 65 | 59 | 122 | 122 | 117 | 127 | 138 | 144 |
| SMMPA11789 | 26 | 21 | 27 | 465 | 435 | 308 | 174 | 231 | 214 |
| SMMPA11790 | 13 | 21 | 12 | 404 | 382 | 291 | 138 | 167 | 163 |
| SMMPA11791 | 11 | 13 | 12 | 16  | 11  | 18  | 21  | 24  | 15  |
| SMMPA11792 | 15 | 11 | 15 | 26  | 18  | 18  | 10  | 20  | 28  |
| SMMPA11793 | 21 | 13 | 21 | 54  | 47  | 36  | 28  | 38  | 36  |
| SMMPA11794 | 14 | 17 | 9  | 27  | 26  | 16  | 23  | 35  | 34  |
| SMMPA11795 | 4  | 9  | 4  | 11  | 12  | 7   | 13  | 7   | 9   |
| SMMPA11796 | 24 | 24 | 12 | 100 | 100 | 61  | 41  | 35  | 41  |
| SMMPA11797 | 16 | 19 | 15 | 64  | 45  | 33  | 41  | 49  | 35  |
| SMMPA11798 | 19 | 14 | 12 | 32  | 21  | 30  | 18  | 15  | 16  |
| SMMPA11799 | 10 | 10 | 11 | 20  | 23  | 19  | 15  | 4   | 11  |
| SMMPA11800 | 14 | 8  | 14 | 11  | 19  | 10  | 14  | 18  | 14  |
| SMMPA11801 | 12 | 16 | 10 | 16  | 25  | 32  | 11  | 16  | 12  |
| SMMPA11802 | 34 | 34 | 24 | 40  | 49  | 40  | 38  | 32  | 26  |
| SMMPA11803 | 13 | 12 | 14 | 33  | 22  | 20  | 12  | 24  | 24  |
| SMMPA11804 | 8  | 10 | 7  | 8   | 12  | 19  | 10  | 15  | 13  |
| SMMPA11805 | 23 | 20 | 23 | 33  | 29  | 36  | 34  | 37  | 32  |
| SMMPA11806 | 6  | 12 | 16 | 33  | 25  | 14  | 14  | 22  | 17  |
| SMMPA11807 | 23 | 30 | 28 | 54  | 51  | 47  | 41  | 48  | 58  |
| SMMPA11808 | 54 | 50 | 52 | 98  | 79  | 66  | 48  | 66  | 62  |
| SMMPA11809 | 34 | 39 | 44 | 73  | 80  | 57  | 62  | 113 | 81  |
| SMMPA11810 | 35 | 43 | 24 | 24  | 22  | 25  | 22  | 25  | 28  |
| SMMPA11811 | 40 | 33 | 25 | 34  | 42  | 41  | 29  | 41  | 28  |

|            |    |    |    |     |     |     |     |     |     |
|------------|----|----|----|-----|-----|-----|-----|-----|-----|
| SMMPA11812 | 22 | 30 | 29 | 86  | 78  | 51  | 49  | 49  | 57  |
| SMMPA11813 | 28 | 45 | 33 | 50  | 45  | 44  | 36  | 74  | 59  |
| SMMPA11814 | 24 | 24 | 17 | 56  | 47  | 41  | 39  | 41  | 36  |
| SMMPA11815 | 18 | 23 | 23 | 42  | 36  | 34  | 31  | 41  | 39  |
| SMMPA11816 | 40 | 29 | 44 | 100 | 90  | 83  | 38  | 82  | 83  |
| SMMPA11817 | 21 | 24 | 13 | 189 | 133 | 124 | 69  | 76  | 90  |
| SMMPA11818 | 25 | 35 | 31 | 172 | 148 | 161 | 87  | 112 | 95  |
| SMMPA11819 | 15 | 12 | 12 | 150 | 190 | 114 | 66  | 95  | 92  |
| SMMPA11820 | 33 | 26 | 21 | 68  | 47  | 57  | 47  | 67  | 58  |
| SMMPA11821 | 9  | 16 | 17 | 40  | 32  | 20  | 25  | 18  | 22  |
| SMMPA11822 | 19 | 12 | 11 | 29  | 20  | 19  | 18  | 19  | 26  |
| SMMPA11823 | 27 | 24 | 21 | 74  | 54  | 41  | 36  | 52  | 51  |
| SMMPA11824 | 24 | 27 | 23 | 157 | 156 | 145 | 159 | 159 | 172 |
| SMMPA11825 | 18 | 13 | 10 | 50  | 59  | 34  | 23  | 31  | 34  |
| SMMPA11826 | 19 | 9  | 8  | 159 | 154 | 115 | 91  | 104 | 73  |
| SMMPA11827 | 12 | 24 | 13 | 55  | 40  | 24  | 22  | 28  | 31  |
| SMMPA11828 | 14 | 19 | 14 | 33  | 22  | 27  | 18  | 23  | 31  |
| SMMPA11829 | 17 | 18 | 21 | 40  | 21  | 26  | 20  | 35  | 36  |
| SMMPA11830 | 16 | 20 | 21 | 68  | 56  | 52  | 31  | 49  | 39  |
| SMMPA11831 | 13 | 5  | 14 | 24  | 28  | 30  | 16  | 17  | 19  |
| SMMPA11832 | 23 | 41 | 33 | 587 | 503 | 378 | 280 | 307 | 301 |
| SMMPA11833 | 34 | 37 | 21 | 83  | 58  | 56  | 45  | 57  | 45  |
| SMMPA11834 | 24 | 23 | 16 | 38  | 42  | 46  | 31  | 32  | 38  |
| SMMPA11835 | 10 | 17 | 10 | 97  | 89  | 55  | 32  | 52  | 43  |
| SMMPA11836 | 27 | 23 | 21 | 153 | 114 | 99  | 94  | 114 | 127 |
| SMMPA11837 | 14 | 7  | 12 | 18  | 30  | 15  | 21  | 38  | 22  |
| SMMPA11838 | 13 | 13 | 16 | 12  | 11  | 13  | 28  | 26  | 23  |
| SMMPA11839 | 5  | 9  | 6  | 14  | 11  | 4   | 8   | 12  | 14  |
| SMMPA11840 | 18 | 22 | 9  | 14  | 15  | 18  | 17  | 32  | 25  |
| SMMPA11841 | 5  | 8  | 2  | 7   | 4   | 7   | 5   | 9   | 9   |
| SMMPA11842 | 21 | 16 | 18 | 14  | 14  | 8   | 17  | 14  | 33  |
| SMMPA11843 | 7  | 8  | 8  | 6   | 5   | 6   | 8   | 13  | 14  |
| SMMPA11844 | 21 | 21 | 14 | 28  | 23  | 22  | 13  | 32  | 19  |
| SMMPA11845 | 23 | 24 | 14 | 9   | 11  | 17  | 24  | 33  | 16  |
| SMMPA11846 | 4  | 6  | 4  | 6   | 4   | 5   | 2   | 9   | 13  |
| SMMPA11847 | 15 | 16 | 22 | 20  | 20  | 16  | 16  | 19  | 27  |
| SMMPA11848 | 14 | 8  | 4  | 10  | 5   | 11  | 16  | 13  | 16  |
| SMMPA11849 | 9  | 11 | 7  | 14  | 17  | 8   | 9   | 17  | 19  |
| SMMPA11850 | 44 | 29 | 24 | 126 | 97  | 63  | 38  | 57  | 49  |
| SMMPA11851 | 44 | 39 | 39 | 106 | 83  | 66  | 34  | 59  | 54  |
| SMMPA11852 | 31 | 38 | 45 | 118 | 104 | 77  | 51  | 56  | 60  |

|            |    |    |    |     |     |     |    |     |     |
|------------|----|----|----|-----|-----|-----|----|-----|-----|
| SMMPA11853 | 9  | 6  | 8  | 10  | 18  | 8   | 8  | 11  | 8   |
| SMMPA11854 | 42 | 35 | 45 | 126 | 129 | 112 | 47 | 54  | 59  |
| SMMPA11855 | 18 | 14 | 18 | 11  | 17  | 11  | 7  | 17  | 21  |
| SMMPA11856 | 13 | 18 | 11 | 92  | 94  | 72  | 46 | 52  | 56  |
| SMMPA11857 | 4  | 5  | 6  | 119 | 95  | 88  | 38 | 61  | 46  |
| SMMPA11858 | 19 | 23 | 19 | 72  | 67  | 49  | 54 | 76  | 54  |
| SMMPA11859 | 20 | 23 | 20 | 165 | 169 | 145 | 80 | 76  | 101 |
| SMMPA11860 | 17 | 14 | 24 | 79  | 79  | 51  | 41 | 61  | 42  |
| SMMPA11861 | 20 | 24 | 24 | 45  | 30  | 41  | 29 | 23  | 36  |
| SMMPA11862 | 1  | 2  | 2  | 2   | 2   | 4   | 4  | 1   | 2   |
| SMMPA11863 | 45 | 38 | 30 | 78  | 68  | 62  | 48 | 57  | 59  |
| SMMPA11864 | 40 | 36 | 37 | 205 | 175 | 167 | 81 | 122 | 113 |
| SMMPA11865 | 24 | 12 | 18 | 38  | 52  | 30  | 34 | 31  | 28  |
| SMMPA11866 | 17 | 16 | 15 | 30  | 26  | 20  | 22 | 26  | 29  |
| SMMPA11867 | 45 | 50 | 36 | 25  | 36  | 30  | 28 | 45  | 46  |
| SMMPA11868 | 12 | 11 | 7  | 36  | 35  | 24  | 25 | 36  | 43  |
| SMMPA11869 | 40 | 32 | 36 | 107 | 96  | 89  | 64 | 72  | 52  |
| SMMPA11870 | 10 | 10 | 12 | 75  | 54  | 63  | 33 | 42  | 37  |
| SMMPA11871 | 24 | 23 | 26 | 86  | 66  | 58  | 42 | 67  | 72  |
| SMMPA11872 | 13 | 14 | 10 | 11  | 10  | 13  | 6  | 11  | 10  |
| SMMPA11873 | 16 | 9  | 12 | 26  | 21  | 29  | 13 | 34  | 20  |
| SMMPA11874 | 10 | 20 | 16 | 74  | 79  | 42  | 33 | 41  | 36  |
| SMMPA11875 | 15 | 13 | 13 | 42  | 36  | 40  | 16 | 27  | 31  |
| SMMPA11876 | 18 | 15 | 11 | 35  | 37  | 35  | 20 | 34  | 29  |
| SMMPA11877 | 8  | 14 | 9  | 36  | 27  | 36  | 15 | 38  | 43  |
| SMMPA11878 | 12 | 22 | 16 | 44  | 31  | 28  | 29 | 33  | 42  |
| SMMPA11879 | 46 | 51 | 47 | 160 | 129 | 109 | 82 | 104 | 113 |
| SMMPA11880 | 30 | 23 | 13 | 90  | 55  | 65  | 36 | 61  | 39  |
| SMMPA11881 | 10 | 8  | 18 | 80  | 58  | 49  | 31 | 44  | 43  |
| SMMPA11882 | 33 | 12 | 27 | 42  | 54  | 51  | 43 | 49  | 46  |
| SMMPA11883 | 5  | 3  | 10 | 7   | 10  | 12  | 8  | 7   | 6   |
| SMMPA11884 | 11 | 11 | 7  | 16  | 13  | 12  | 16 | 19  | 18  |
| SMMPA11885 | 6  | 12 | 11 | 81  | 68  | 35  | 38 | 45  | 36  |
| SMMPA11886 | 17 | 16 | 11 | 38  | 34  | 33  | 22 | 22  | 30  |
| SMMPA11887 | 27 | 24 | 25 | 50  | 42  | 42  | 36 | 50  | 53  |
| SMMPA11888 | 15 | 17 | 14 | 20  | 22  | 25  | 23 | 25  | 21  |
| SMMPA11889 | 14 | 15 | 10 | 96  | 83  | 51  | 43 | 67  | 59  |
| SMMPA11890 | 29 | 16 | 16 | 27  | 34  | 26  | 16 | 43  | 23  |
| SMMPA11891 | 33 | 18 | 19 | 123 | 102 | 75  | 52 | 82  | 68  |
| SMMPA11892 | 14 | 8  | 22 | 39  | 38  | 29  | 30 | 25  | 20  |
| SMMPA11893 | 25 | 21 | 19 | 58  | 45  | 43  | 21 | 37  | 44  |

|            |    |    |    |      |      |      |     |      |     |
|------------|----|----|----|------|------|------|-----|------|-----|
| SMMPA11894 | 33 | 21 | 19 | 49   | 47   | 41   | 31  | 54   | 46  |
| SMMPA11895 | 14 | 15 | 18 | 24   | 15   | 19   | 19  | 23   | 24  |
| SMMPA11896 | 21 | 25 | 16 | 118  | 117  | 85   | 63  | 82   | 78  |
| SMMPA11897 | 36 | 22 | 19 | 107  | 87   | 71   | 103 | 142  | 118 |
| SMMPA11898 | 9  | 12 | 13 | 190  | 149  | 129  | 155 | 186  | 199 |
| SMMPA11899 | 9  | 13 | 7  | 103  | 100  | 76   | 64  | 87   | 70  |
| SMMPA11900 | 31 | 35 | 31 | 408  | 404  | 271  | 253 | 391  | 371 |
| SMMPA11901 | 21 | 11 | 21 | 40   | 43   | 26   | 16  | 25   | 17  |
| SMMPA11902 | 25 | 30 | 22 | 55   | 34   | 41   | 27  | 51   | 50  |
| SMMPA11903 | 12 | 26 | 19 | 55   | 44   | 40   | 29  | 43   | 50  |
| SMMPA11904 | 24 | 31 | 28 | 66   | 58   | 51   | 37  | 60   | 58  |
| SMMPA11905 | 10 | 14 | 14 | 16   | 23   | 19   | 13  | 15   | 20  |
| SMMPA11906 | 12 | 7  | 5  | 10   | 12   | 12   | 10  | 18   | 13  |
| SMMPA11907 | 13 | 12 | 12 | 11   | 13   | 10   | 17  | 21   | 13  |
| SMMPA11908 | 10 | 12 | 9  | 9    | 8    | 17   | 16  | 22   | 16  |
| SMMPA11909 | 7  | 8  | 7  | 9    | 8    | 8    | 16  | 16   | 13  |
| SMMPA11910 | 14 | 10 | 14 | 25   | 10   | 10   | 19  | 21   | 19  |
| SMMPA11911 | 16 | 20 | 18 | 20   | 18   | 28   | 19  | 26   | 19  |
| SMMPA11912 | 14 | 15 | 17 | 28   | 17   | 19   | 22  | 24   | 31  |
| SMMPA11913 | 22 | 18 | 10 | 24   | 25   | 12   | 25  | 31   | 23  |
| SMMPA11914 | 52 | 55 | 40 | 349  | 342  | 305  | 119 | 153  | 129 |
| SMMPA11915 | 61 | 55 | 56 | 105  | 96   | 77   | 71  | 90   | 76  |
| SMMPA11916 | 25 | 22 | 24 | 479  | 371  | 365  | 178 | 220  | 198 |
| SMMPA11917 | 35 | 41 | 31 | 1155 | 1080 | 1079 | 465 | 574  | 566 |
| SMMPA11918 | 24 | 22 | 25 | 866  | 860  | 812  | 438 | 567  | 471 |
| SMMPA11919 | 26 | 25 | 24 | 722  | 716  | 674  | 319 | 491  | 380 |
| SMMPA11920 | 13 | 17 | 16 | 394  | 348  | 349  | 240 | 269  | 252 |
| SMMPA11921 | 12 | 14 | 17 | 642  | 617  | 551  | 352 | 451  | 442 |
| SMMPA11922 | 27 | 25 | 20 | 420  | 362  | 350  | 275 | 378  | 348 |
| SMMPA11923 | 39 | 38 | 44 | 969  | 933  | 867  | 509 | 658  | 666 |
| SMMPA11924 | 15 | 25 | 17 | 174  | 187  | 173  | 119 | 168  | 143 |
| SMMPA11925 | 21 | 28 | 23 | 1319 | 1506 | 1583 | 776 | 1028 | 857 |
| SMMPA11926 | 19 | 15 | 15 | 702  | 743  | 810  | 472 | 551  | 470 |
| SMMPA11927 | 29 | 35 | 23 | 373  | 370  | 277  | 165 | 205  | 172 |
| SMMPA11928 | 8  | 23 | 10 | 101  | 91   | 64   | 64  | 53   | 52  |
| SMMPA11929 | 12 | 26 | 18 | 46   | 46   | 51   | 25  | 33   | 41  |
| SMMPA11930 | 22 | 21 | 28 | 54   | 46   | 41   | 35  | 35   | 45  |
| SMMPA11931 | 10 | 22 | 25 | 22   | 27   | 23   | 20  | 28   | 28  |
| SMMPA11932 | 60 | 60 | 51 | 315  | 266  | 218  | 103 | 127  | 130 |
| SMMPA11933 | 16 | 14 | 19 | 73   | 45   | 54   | 38  | 30   | 32  |
| SMMPA11934 | 21 | 12 | 11 | 55   | 44   | 33   | 19  | 37   | 31  |

|            |    |    |    |     |     |     |     |     |     |
|------------|----|----|----|-----|-----|-----|-----|-----|-----|
| SMMPA11935 | 36 | 29 | 35 | 67  | 62  | 63  | 40  | 62  | 58  |
| SMMPA11936 | 23 | 26 | 14 | 49  | 39  | 46  | 42  | 42  | 39  |
| SMMPA11937 | 10 | 15 | 14 | 105 | 104 | 75  | 42  | 38  | 63  |
| SMMPA11938 | 42 | 43 | 39 | 81  | 59  | 65  | 49  | 72  | 62  |
| SMMPA11939 | 25 | 26 | 24 | 110 | 98  | 87  | 46  | 69  | 48  |
| SMMPA11940 | 10 | 14 | 16 | 298 | 252 | 219 | 72  | 91  | 71  |
| SMMPA11941 | 18 | 22 | 11 | 164 | 159 | 131 | 45  | 59  | 46  |
| SMMPA11942 | 29 | 18 | 16 | 38  | 32  | 30  | 35  | 35  | 43  |
| SMMPA11943 | 26 | 29 | 23 | 25  | 32  | 26  | 25  | 29  | 33  |
| SMMPA11944 | 30 | 27 | 41 | 25  | 29  | 35  | 25  | 41  | 39  |
| SMMPA11945 | 22 | 22 | 17 | 47  | 34  | 39  | 25  | 39  | 38  |
| SMMPA11946 | 30 | 33 | 28 | 86  | 103 | 64  | 69  | 77  | 84  |
| SMMPA11947 | 11 | 13 | 8  | 35  | 30  | 30  | 23  | 27  | 23  |
| SMMPA11948 | 35 | 36 | 35 | 94  | 85  | 78  | 55  | 66  | 59  |
| SMMPA11949 | 22 | 25 | 13 | 54  | 63  | 52  | 39  | 49  | 31  |
| SMMPA11950 | 27 | 22 | 36 | 136 | 129 | 118 | 71  | 63  | 72  |
| SMMPA11951 | 17 | 14 | 11 | 39  | 34  | 23  | 26  | 31  | 28  |
| SMMPA11952 | 16 | 13 | 6  | 15  | 25  | 14  | 19  | 23  | 37  |
| SMMPA11953 | 12 | 19 | 19 | 14  | 14  | 16  | 24  | 24  | 25  |
| SMMPA11954 | 9  | 11 | 21 | 56  | 61  | 35  | 28  | 41  | 42  |
| SMMPA11955 | 11 | 7  | 6  | 41  | 24  | 16  | 17  | 34  | 33  |
| SMMPA11956 | 15 | 11 | 8  | 63  | 70  | 48  | 52  | 51  | 61  |
| SMMPA11957 | 46 | 49 | 44 | 42  | 39  | 42  | 39  | 58  | 55  |
| SMMPA11958 | 48 | 37 | 43 | 49  | 44  | 43  | 40  | 52  | 57  |
| SMMPA11959 | 24 | 20 | 22 | 15  | 14  | 22  | 20  | 22  | 23  |
| SMMPA11960 | 37 | 21 | 27 | 36  | 35  | 43  | 26  | 39  | 38  |
| SMMPA11961 | 50 | 36 | 38 | 33  | 42  | 38  | 51  | 40  | 58  |
| SMMPA11962 | 28 | 20 | 24 | 52  | 49  | 52  | 36  | 41  | 44  |
| SMMPA11963 | 14 | 15 | 9  | 19  | 12  | 13  | 18  | 22  | 28  |
| SMMPA11964 | 32 | 36 | 30 | 32  | 37  | 39  | 34  | 53  | 43  |
| SMMPA11965 | 13 | 22 | 20 | 193 | 201 | 158 | 99  | 142 | 125 |
| SMMPA11966 | 67 | 80 | 64 | 110 | 104 | 96  | 97  | 123 | 115 |
| SMMPA11967 | 36 | 23 | 27 | 144 | 122 | 85  | 79  | 85  | 94  |
| SMMPA11968 | 22 | 30 | 23 | 351 | 303 | 232 | 136 | 183 | 201 |
| SMMPA11969 | 37 | 41 | 34 | 472 | 405 | 327 | 172 | 219 | 191 |
| SMMPA11970 | 27 | 33 | 23 | 187 | 167 | 125 | 106 | 135 | 139 |
| SMMPA11971 | 15 | 15 | 8  | 199 | 159 | 153 | 75  | 87  | 70  |
| SMMPA11972 | 30 | 37 | 33 | 469 | 431 | 347 | 151 | 203 | 207 |
| SMMPA11973 | 28 | 26 | 22 | 370 | 319 | 255 | 141 | 204 | 175 |
| SMMPA11974 | 12 | 15 | 18 | 123 | 106 | 75  | 50  | 70  | 79  |
| SMMPA11975 | 6  | 3  | 3  | 51  | 56  | 57  | 20  | 37  | 37  |

|            |    |    |    |     |     |     |     |     |     |
|------------|----|----|----|-----|-----|-----|-----|-----|-----|
| SMMPA11976 | 32 | 32 | 25 | 284 | 279 | 206 | 103 | 154 | 107 |
| SMMPA11977 | 15 | 18 | 13 | 80  | 59  | 50  | 34  | 44  | 42  |
| SMMPA11978 | 5  | 4  | 5  | 32  | 24  | 18  | 25  | 18  | 23  |
| SMMPA11979 | 9  | 12 | 14 | 52  | 38  | 34  | 34  | 44  | 34  |
| SMMPA11980 | 29 | 22 | 22 | 231 | 195 | 146 | 89  | 126 | 111 |
| SMMPA11981 | 18 | 33 | 32 | 397 | 352 | 283 | 117 | 173 | 173 |
| SMMPA11982 | 3  | 1  | 1  | 6   | 4   | 1   | 2   | 3   | 2   |
| SMMPA11983 | 31 | 33 | 35 | 93  | 92  | 53  | 39  | 42  | 38  |
| SMMPA11984 | 11 | 15 | 12 | 38  | 38  | 24  | 19  | 26  | 36  |
| SMMPA11985 | 16 | 5  | 11 | 48  | 38  | 23  | 22  | 26  | 38  |
| SMMPA11986 | 11 | 8  | 9  | 34  | 18  | 18  | 16  | 14  | 14  |
| SMMPA11987 | 17 | 15 | 17 | 66  | 73  | 59  | 34  | 37  | 50  |
| SMMPA11988 | 16 | 14 | 12 | 22  | 29  | 24  | 23  | 23  | 34  |
| SMMPA11989 | 10 | 11 | 8  | 12  | 17  | 16  | 15  | 22  | 13  |
| SMMPA11990 | 29 | 34 | 26 | 71  | 92  | 67  | 50  | 71  | 75  |
| SMMPA11991 | 14 | 22 | 8  | 65  | 54  | 37  | 24  | 46  | 49  |
| SMMPA11992 | 5  | 9  | 5  | 40  | 40  | 35  | 32  | 40  | 22  |
| SMMPA11993 | 17 | 11 | 23 | 107 | 95  | 73  | 34  | 48  | 40  |
| SMMPA11994 | 9  | 14 | 9  | 31  | 30  | 20  | 20  | 16  | 21  |
| SMMPA11995 | 18 | 18 | 17 | 106 | 85  | 61  | 31  | 60  | 51  |
| SMMPA11996 | 14 | 17 | 12 | 18  | 13  | 12  | 15  | 16  | 17  |
| SMMPA11997 | 13 | 20 | 20 | 20  | 18  | 21  | 26  | 27  | 32  |
| SMMPA11998 | 25 | 21 | 17 | 22  | 17  | 27  | 23  | 41  | 21  |
| SMMPA11999 | 10 | 10 | 12 | 7   | 12  | 10  | 18  | 23  | 25  |
| SMMPA12000 | 14 | 12 | 17 | 9   | 10  | 10  | 18  | 32  | 29  |
| SMMPA12001 | 21 | 17 | 14 | 30  | 22  | 24  | 29  | 34  | 52  |
| SMMPA12002 | 20 | 22 | 25 | 31  | 15  | 23  | 26  | 22  | 34  |
| SMMPA12003 | 17 | 10 | 14 | 16  | 10  | 13  | 22  | 25  | 19  |
| SMMPA12004 | 5  | 6  | 6  | 4   | 9   | 3   | 7   | 7   | 4   |
| SMMPA12005 | 13 | 19 | 18 | 27  | 37  | 19  | 18  | 38  | 22  |
| SMMPA12006 | 14 | 15 | 21 | 46  | 32  | 37  | 24  | 34  | 14  |
| SMMPA12007 | 9  | 16 | 10 | 24  | 15  | 22  | 10  | 25  | 31  |
| SMMPA12008 | 7  | 5  | 8  | 13  | 10  | 13  | 14  | 19  | 14  |
| SMMPA12009 | 16 | 20 | 16 | 39  | 24  | 22  | 20  | 30  | 28  |
| SMMPA12010 | 16 | 18 | 16 | 27  | 28  | 23  | 18  | 31  | 31  |
| SMMPA12011 | 29 | 32 | 23 | 74  | 70  | 56  | 50  | 71  | 57  |
| SMMPA12012 | 20 | 21 | 19 | 56  | 44  | 33  | 28  | 36  | 29  |
| SMMPA12013 | 35 | 39 | 21 | 89  | 84  | 57  | 43  | 77  | 59  |
| SMMPA12014 | 18 | 15 | 18 | 39  | 35  | 37  | 41  | 43  | 34  |
| SMMPA12015 | 28 | 37 | 24 | 148 | 145 | 101 | 117 | 148 | 131 |
| SMMPA12016 | 18 | 20 | 19 | 53  | 59  | 52  | 45  | 59  | 46  |

|            |    |    |    |      |      |      |     |     |     |
|------------|----|----|----|------|------|------|-----|-----|-----|
| SMMPA12017 | 25 | 23 | 16 | 89   | 88   | 80   | 55  | 87  | 65  |
| SMMPA12018 | 19 | 35 | 36 | 1210 | 1108 | 1003 | 474 | 646 | 547 |
| SMMPA12019 | 29 | 24 | 22 | 74   | 61   | 66   | 49  | 69  | 60  |
| SMMPA12020 | 12 | 5  | 10 | 12   | 27   | 23   | 8   | 17  | 13  |
| SMMPA12021 | 20 | 9  | 10 | 465  | 469  | 424  | 202 | 256 | 202 |
| SMMPA12022 | 22 | 13 | 15 | 515  | 422  | 378  | 149 | 206 | 187 |
| SMMPA12023 | 15 | 17 | 18 | 94   | 73   | 68   | 40  | 41  | 31  |
| SMMPA12024 | 12 | 12 | 16 | 12   | 11   | 16   | 24  | 16  | 25  |
| SMMPA12025 | 16 | 18 | 10 | 29   | 40   | 29   | 24  | 32  | 37  |
| SMMPA12026 | 8  | 7  | 16 | 22   | 16   | 15   | 17  | 17  | 19  |
| SMMPA12027 | 24 | 39 | 19 | 53   | 44   | 42   | 41  | 51  | 39  |
| SMMPA12028 | 22 | 24 | 27 | 268  | 282  | 222  | 125 | 145 | 116 |
| SMMPA12029 | 15 | 18 | 5  | 188  | 180  | 141  | 72  | 95  | 99  |
| SMMPA12030 | 9  | 19 | 14 | 20   | 12   | 20   | 22  | 19  | 25  |
| SMMPA12031 | 8  | 12 | 13 | 9    | 10   | 15   | 13  | 14  | 21  |
| SMMPA12032 | 6  | 9  | 9  | 2    | 8    | 10   | 14  | 22  | 17  |
| SMMPA12033 | 11 | 17 | 19 | 19   | 19   | 19   | 17  | 23  | 23  |
| SMMPA12034 | 18 | 15 | 12 | 22   | 23   | 19   | 33  | 37  | 29  |
| SMMPA12035 | 34 | 49 | 31 | 48   | 42   | 45   | 39  | 56  | 53  |
| SMMPA12036 | 33 | 33 | 20 | 30   | 29   | 24   | 26  | 39  | 36  |
| SMMPA12037 | 21 | 27 | 24 | 37   | 24   | 21   | 25  | 33  | 40  |
| SMMPA12038 | 34 | 24 | 31 | 33   | 35   | 31   | 50  | 57  | 53  |
| SMMPA12039 | 10 | 4  | 9  | 45   | 38   | 32   | 19  | 23  | 20  |
| SMMPA12040 | 19 | 25 | 15 | 306  | 248  | 177  | 122 | 142 | 100 |
| SMMPA12041 | 24 | 23 | 17 | 112  | 115  | 90   | 53  | 78  | 51  |
| SMMPA12042 | 13 | 22 | 12 | 44   | 44   | 48   | 27  | 39  | 34  |
| SMMPA12043 | 13 | 20 | 13 | 24   | 17   | 23   | 13  | 22  | 25  |
| SMMPA12044 | 22 | 14 | 19 | 31   | 40   | 30   | 23  | 17  | 20  |
| SMMPA12045 | 6  | 14 | 13 | 166  | 163  | 102  | 70  | 75  | 95  |
| SMMPA12046 | 35 | 38 | 35 | 266  | 260  | 189  | 121 | 193 | 154 |
| SMMPA12047 | 6  | 14 | 12 | 90   | 89   | 67   | 50  | 63  | 49  |
| SMMPA12048 | 7  | 5  | 4  | 6    | 8    | 8    | 8   | 5   | 7   |
| SMMPA12049 | 35 | 32 | 24 | 54   | 62   | 45   | 44  | 64  | 48  |
| SMMPA12050 | 8  | 12 | 10 | 74   | 87   | 55   | 37  | 33  | 44  |
| SMMPA12051 | 48 | 45 | 34 | 446  | 421  | 289  | 148 | 191 | 166 |
| SMMPA12052 | 36 | 33 | 37 | 70   | 74   | 42   | 47  | 62  | 65  |
| SMMPA12053 | 12 | 9  | 14 | 75   | 72   | 49   | 43  | 55  | 45  |
| SMMPA12054 | 21 | 10 | 17 | 129  | 127  | 107  | 61  | 74  | 70  |
| SMMPA12055 | 6  | 8  | 6  | 40   | 39   | 37   | 20  | 29  | 22  |
| SMMPA12056 | 27 | 31 | 20 | 96   | 102  | 67   | 52  | 72  | 75  |
| SMMPA12057 | 14 | 14 | 18 | 37   | 30   | 31   | 27  | 38  | 33  |

|            |    |    |    |      |     |     |     |     |     |
|------------|----|----|----|------|-----|-----|-----|-----|-----|
| SMMPA12058 | 42 | 39 | 30 | 157  | 138 | 84  | 52  | 75  | 75  |
| SMMPA12059 | 65 | 64 | 50 | 90   | 78  | 61  | 78  | 83  | 84  |
| SMMPA12060 | 22 | 20 | 14 | 102  | 100 | 63  | 48  | 56  | 65  |
| SMMPA12061 | 24 | 21 | 16 | 51   | 55  | 43  | 38  | 53  | 51  |
| SMMPA12062 | 42 | 30 | 30 | 152  | 173 | 125 | 84  | 107 | 102 |
| SMMPA12063 | 8  | 15 | 7  | 29   | 28  | 28  | 26  | 30  | 41  |
| SMMPA12064 | 21 | 35 | 26 | 66   | 63  | 52  | 46  | 50  | 42  |
| SMMPA12065 | 22 | 30 | 16 | 66   | 55  | 33  | 31  | 31  | 25  |
| SMMPA12066 | 18 | 12 | 14 | 38   | 25  | 24  | 17  | 31  | 28  |
| SMMPA12067 | 10 | 10 | 9  | 13   | 12  | 5   | 9   | 10  | 8   |
| SMMPA12068 | 7  | 12 | 7  | 14   | 15  | 9   | 20  | 15  | 13  |
| SMMPA12069 | 77 | 92 | 91 | 109  | 100 | 85  | 95  | 112 | 110 |
| SMMPA12070 | 16 | 11 | 12 | 120  | 120 | 111 | 59  | 89  | 62  |
| SMMPA12071 | 27 | 28 | 19 | 64   | 57  | 41  | 32  | 52  | 49  |
| SMMPA12072 | 10 | 17 | 11 | 48   | 53  | 41  | 31  | 38  | 32  |
| SMMPA12073 | 10 | 10 | 18 | 151  | 129 | 113 | 66  | 73  | 62  |
| SMMPA12074 | 25 | 20 | 24 | 59   | 64  | 46  | 37  | 65  | 65  |
| SMMPA12075 | 24 | 23 | 26 | 40   | 38  | 28  | 33  | 39  | 38  |
| SMMPA12076 | 12 | 16 | 11 | 23   | 22  | 16  | 19  | 28  | 17  |
| SMMPA12077 | 35 | 36 | 30 | 61   | 68  | 62  | 37  | 80  | 70  |
| SMMPA12078 | 20 | 23 | 18 | 72   | 48  | 52  | 39  | 53  | 49  |
| SMMPA12079 | 13 | 22 | 21 | 33   | 31  | 29  | 27  | 46  | 31  |
| SMMPA12080 | 10 | 14 | 18 | 35   | 47  | 29  | 25  | 25  | 42  |
| SMMPA12081 | 69 | 63 | 51 | 45   | 48  | 35  | 49  | 70  | 68  |
| SMMPA12082 | 39 | 45 | 42 | 32   | 30  | 40  | 25  | 39  | 49  |
| SMMPA12083 | 27 | 24 | 28 | 33   | 30  | 30  | 33  | 38  | 34  |
| SMMPA12084 | 50 | 37 | 28 | 102  | 95  | 91  | 74  | 89  | 80  |
| SMMPA12085 | 29 | 29 | 24 | 32   | 28  | 29  | 26  | 60  | 48  |
| SMMPA12086 | 27 | 23 | 20 | 38   | 31  | 34  | 42  | 45  | 43  |
| SMMPA12087 | 26 | 24 | 17 | 44   | 48  | 41  | 25  | 53  | 30  |
| SMMPA12088 | 26 | 33 | 19 | 53   | 54  | 41  | 46  | 48  | 48  |
| SMMPA12089 | 25 | 32 | 25 | 109  | 102 | 75  | 62  | 62  | 61  |
| SMMPA12090 | 26 | 23 | 22 | 322  | 251 | 241 | 125 | 164 | 165 |
| SMMPA12091 | 45 | 39 | 51 | 738  | 593 | 505 | 278 | 362 | 306 |
| SMMPA12092 | 34 | 25 | 29 | 1071 | 969 | 946 | 426 | 565 | 506 |
| SMMPA12093 | 35 | 28 | 27 | 360  | 308 | 264 | 175 | 205 | 203 |
| SMMPA12094 | 26 | 21 | 34 | 488  | 462 | 357 | 192 | 253 | 228 |
| SMMPA12095 | 27 | 35 | 17 | 45   | 50  | 31  | 38  | 53  | 41  |
| SMMPA12096 | 30 | 44 | 51 | 155  | 157 | 131 | 88  | 109 | 114 |
| SMMPA12097 | 32 | 24 | 28 | 194  | 156 | 122 | 83  | 96  | 88  |
| SMMPA12098 | 25 | 38 | 33 | 333  | 261 | 222 | 167 | 232 | 170 |



|            |    |    |    |     |     |     |     |     |     |
|------------|----|----|----|-----|-----|-----|-----|-----|-----|
| SMMPA12099 | 18 | 24 | 14 | 94  | 84  | 61  | 59  | 90  | 101 |
| SMMPA12100 | 31 | 40 | 34 | 65  | 64  | 67  | 41  | 43  | 46  |
| SMMPA12101 | 41 | 35 | 43 | 80  | 69  | 56  | 43  | 60  | 50  |
| SMMPA12102 | 32 | 23 | 25 | 30  | 20  | 22  | 14  | 19  | 20  |
| SMMPA12103 | 19 | 21 | 24 | 42  | 52  | 44  | 30  | 38  | 37  |
| SMMPA12104 | 39 | 41 | 31 | 49  | 46  | 40  | 52  | 60  | 64  |
| SMMPA12105 | 27 | 31 | 29 | 48  | 52  | 44  | 47  | 52  | 49  |
| SMMPA12106 | 41 | 40 | 36 | 56  | 77  | 48  | 52  | 81  | 97  |
| SMMPA12107 | 33 | 35 | 23 | 62  | 49  | 41  | 32  | 62  | 49  |
| SMMPA12108 | 13 | 13 | 16 | 288 | 292 | 227 | 111 | 146 | 110 |
| SMMPA12109 | 18 | 19 | 10 | 304 | 313 | 252 | 169 | 244 | 201 |
| SMMPA12110 | 19 | 33 | 29 | 321 | 329 | 236 | 146 | 211 | 159 |
| SMMPA12111 | 15 | 23 | 17 | 616 | 588 | 573 | 381 | 498 | 425 |
| SMMPA12112 | 39 | 65 | 52 | 615 | 600 | 572 | 395 | 478 | 391 |
| SMMPA12113 | 26 | 22 | 16 | 76  | 77  | 49  | 24  | 44  | 28  |
| SMMPA12114 | 10 | 10 | 11 | 154 | 171 | 179 | 59  | 62  | 55  |
| SMMPA12115 | 19 | 18 | 17 | 293 | 247 | 199 | 79  | 85  | 71  |
| SMMPA12116 | 27 | 29 | 20 | 598 | 607 | 626 | 210 | 258 | 214 |
| SMMPA12117 | 14 | 25 | 19 | 275 | 244 | 232 | 148 | 194 | 197 |
| SMMPA12118 | 39 | 28 | 32 | 63  | 48  | 47  | 35  | 40  | 53  |
| SMMPA12119 | 15 | 16 | 15 | 142 | 124 | 108 | 49  | 68  | 70  |
| SMMPA12120 | 19 | 16 | 16 | 284 | 255 | 175 | 104 | 131 | 120 |
| SMMPA12121 | 19 | 20 | 18 | 84  | 63  | 35  | 15  | 36  | 34  |
| SMMPA12122 | 43 | 46 | 31 | 51  | 54  | 51  | 41  | 61  | 47  |
| SMMPA12123 | 27 | 29 | 19 | 101 | 82  | 64  | 57  | 69  | 83  |
| SMMPA12124 | 23 | 20 | 20 | 95  | 86  | 64  | 65  | 91  | 68  |
| SMMPA12125 | 30 | 29 | 27 | 49  | 45  | 35  | 40  | 44  | 53  |
| SMMPA12126 | 35 | 32 | 36 | 30  | 30  | 25  | 33  | 32  | 39  |
| SMMPA12127 | 6  | 14 | 10 | 19  | 25  | 10  | 21  | 24  | 18  |
| SMMPA12128 | 9  | 5  | 7  | 25  | 17  | 21  | 45  | 48  | 40  |
| SMMPA12129 | 24 | 17 | 6  | 29  | 41  | 25  | 24  | 29  | 26  |
| SMMPA12130 | 28 | 16 | 12 | 42  | 37  | 31  | 44  | 32  | 45  |
| SMMPA12131 | 13 | 15 | 13 | 39  | 36  | 32  | 27  | 31  | 14  |
| SMMPA12132 | 24 | 20 | 18 | 49  | 35  | 34  | 55  | 64  | 58  |
| SMMPA12133 | 10 | 15 | 15 | 15  | 20  | 13  | 12  | 24  | 22  |
| SMMPA12134 | 9  | 5  | 4  | 11  | 11  | 11  | 12  | 11  | 18  |
| SMMPA12135 | 30 | 45 | 29 | 140 | 150 | 130 | 65  | 82  | 74  |
| SMMPA12136 | 20 | 23 | 15 | 182 | 165 | 141 | 131 | 153 | 137 |
| SMMPA12137 | 22 | 26 | 21 | 35  | 48  | 31  | 33  | 27  | 42  |
| SMMPA12138 | 26 | 25 | 18 | 98  | 110 | 88  | 58  | 54  | 49  |
| SMMPA12139 | 10 | 8  | 7  | 52  | 31  | 34  | 24  | 38  | 21  |

|            |    |    |    |     |     |     |     |     |     |
|------------|----|----|----|-----|-----|-----|-----|-----|-----|
| SMMPA12140 | 26 | 21 | 30 | 106 | 108 | 92  | 47  | 85  | 67  |
| SMMPA12141 | 12 | 16 | 16 | 77  | 72  | 48  | 34  | 30  | 29  |
| SMMPA12142 | 27 | 29 | 26 | 177 | 152 | 112 | 64  | 105 | 75  |
| SMMPA12143 | 9  | 9  | 9  | 22  | 16  | 17  | 14  | 23  | 17  |
| SMMPA12144 | 20 | 25 | 13 | 46  | 34  | 35  | 25  | 26  | 28  |
| SMMPA12145 | 17 | 13 | 15 | 62  | 76  | 45  | 21  | 41  | 40  |
| SMMPA12146 | 12 | 11 | 14 | 51  | 35  | 33  | 26  | 30  | 37  |
| SMMPA12147 | 22 | 22 | 21 | 32  | 24  | 17  | 24  | 38  | 24  |
| SMMPA12148 | 25 | 24 | 27 | 35  | 36  | 26  | 32  | 42  | 29  |
| SMMPA12149 | 26 | 19 | 21 | 72  | 70  | 51  | 35  | 76  | 40  |
| SMMPA12150 | 28 | 18 | 20 | 72  | 56  | 40  | 33  | 44  | 48  |
| SMMPA12151 | 17 | 12 | 16 | 67  | 68  | 48  | 35  | 39  | 42  |
| SMMPA12152 | 24 | 23 | 14 | 63  | 61  | 52  | 30  | 54  | 34  |
| SMMPA12153 | 4  | 12 | 13 | 12  | 12  | 11  | 9   | 17  | 12  |
| SMMPA12154 | 8  | 12 | 13 | 53  | 51  | 36  | 25  | 46  | 46  |
| SMMPA12155 | 27 | 35 | 25 | 49  | 37  | 38  | 30  | 37  | 37  |
| SMMPA12156 | 91 | 82 | 75 | 89  | 71  | 79  | 66  | 94  | 98  |
| SMMPA12157 | 16 | 9  | 15 | 44  | 39  | 31  | 34  | 38  | 32  |
| SMMPA12158 | 24 | 17 | 27 | 325 | 292 | 194 | 154 | 200 | 162 |
| SMMPA12159 | 28 | 24 | 16 | 55  | 38  | 32  | 38  | 46  | 43  |
| SMMPA12160 | 29 | 22 | 18 | 45  | 34  | 34  | 30  | 59  | 45  |
| SMMPA12161 | 26 | 24 | 23 | 90  | 98  | 73  | 64  | 77  | 70  |
| SMMPA12162 | 27 | 16 | 26 | 261 | 240 | 202 | 96  | 150 | 122 |
| SMMPA12163 | 24 | 23 | 16 | 42  | 40  | 43  | 20  | 50  | 47  |
| SMMPA12164 | 17 | 23 | 19 | 79  | 60  | 36  | 51  | 57  | 53  |
| SMMPA12165 | 17 | 11 | 15 | 19  | 22  | 11  | 26  | 34  | 20  |
| SMMPA12166 | 47 | 47 | 44 | 33  | 31  | 39  | 37  | 35  | 37  |
| SMMPA12167 | 15 | 22 | 12 | 27  | 46  | 27  | 28  | 22  | 17  |
| SMMPA12168 | 20 | 22 | 18 | 93  | 75  | 64  | 54  | 64  | 65  |
| SMMPA12169 | 26 | 16 | 23 | 42  | 37  | 41  | 28  | 48  | 43  |
| SMMPA12170 | 38 | 28 | 42 | 80  | 76  | 77  | 38  | 55  | 46  |
| SMMPA12171 | 12 | 13 | 16 | 62  | 70  | 44  | 35  | 26  | 36  |
| SMMPA12172 | 9  | 9  | 17 | 17  | 22  | 10  | 4   | 18  | 15  |
| SMMPA12173 | 17 | 12 | 9  | 17  | 12  | 16  | 19  | 14  | 22  |
| SMMPA12174 | 45 | 50 | 40 | 67  | 59  | 48  | 44  | 68  | 72  |
| SMMPA12175 | 30 | 37 | 27 | 38  | 24  | 30  | 28  | 28  | 28  |
| SMMPA12176 | 15 | 18 | 15 | 137 | 125 | 106 | 72  | 92  | 89  |
| SMMPA12177 | 15 | 18 | 16 | 62  | 55  | 41  | 41  | 44  | 49  |
| SMMPA12178 | 41 | 32 | 35 | 207 | 221 | 169 | 118 | 142 | 144 |
| SMMPA12179 | 6  | 11 | 13 | 31  | 38  | 14  | 17  | 18  | 12  |
| SMMPA12180 | 19 | 23 | 12 | 40  | 33  | 30  | 24  | 30  | 30  |

|            |    |    |    |     |     |     |    |     |     |
|------------|----|----|----|-----|-----|-----|----|-----|-----|
| SMMPA12181 | 24 | 23 | 14 | 52  | 49  | 36  | 30 | 46  | 48  |
| SMMPA12182 | 11 | 13 | 9  | 27  | 22  | 26  | 19 | 27  | 25  |
| SMMPA12183 | 21 | 28 | 24 | 39  | 40  | 30  | 28 | 39  | 45  |
| SMMPA12184 | 11 | 18 | 11 | 44  | 43  | 47  | 23 | 21  | 27  |
| SMMPA12185 | 18 | 17 | 22 | 75  | 66  | 54  | 44 | 49  | 44  |
| SMMPA12186 | 11 | 28 | 20 | 43  | 47  | 33  | 37 | 50  | 33  |
| SMMPA12187 | 18 | 20 | 11 | 21  | 26  | 20  | 26 | 24  | 26  |
| SMMPA12188 | 26 | 24 | 29 | 14  | 26  | 26  | 31 | 47  | 53  |
| SMMPA12189 | 14 | 10 | 7  | 24  | 21  | 22  | 16 | 33  | 21  |
| SMMPA12190 | 13 | 16 | 8  | 14  | 16  | 16  | 12 | 15  | 19  |
| SMMPA12191 | 19 | 17 | 15 | 20  | 18  | 18  | 20 | 24  | 28  |
| SMMPA12192 | 14 | 14 | 11 | 29  | 19  | 12  | 20 | 22  | 34  |
| SMMPA12193 | 5  | 10 | 8  | 16  | 13  | 7   | 9  | 20  | 15  |
| SMMPA12194 | 27 | 16 | 26 | 46  | 31  | 33  | 19 | 26  | 24  |
| SMMPA12195 | 27 | 29 | 34 | 34  | 42  | 40  | 17 | 21  | 34  |
| SMMPA12196 | 35 | 36 | 28 | 103 | 114 | 87  | 72 | 122 | 109 |
| SMMPA12197 | 30 | 24 | 22 | 69  | 92  | 62  | 56 | 54  | 49  |
| SMMPA12198 | 17 | 9  | 16 | 41  | 23  | 31  | 29 | 40  | 29  |
| SMMPA12199 | 35 | 36 | 20 | 40  | 40  | 35  | 45 | 68  | 61  |
| SMMPA12200 | 23 | 26 | 27 | 50  | 53  | 31  | 46 | 42  | 45  |
| SMMPA12201 | 20 | 29 | 22 | 35  | 37  | 28  | 31 | 42  | 39  |
| SMMPA12202 | 29 | 22 | 22 | 48  | 34  | 36  | 45 | 48  | 47  |
| SMMPA12203 | 27 | 32 | 30 | 45  | 39  | 33  | 31 | 42  | 45  |
| SMMPA12204 | 18 | 12 | 16 | 43  | 34  | 28  | 34 | 40  | 38  |
| SMMPA12205 | 18 | 25 | 28 | 41  | 40  | 38  | 49 | 56  | 38  |
| SMMPA12206 | 39 | 27 | 26 | 82  | 58  | 53  | 48 | 49  | 58  |
| SMMPA12207 | 17 | 34 | 28 | 23  | 26  | 18  | 31 | 31  | 28  |
| SMMPA12208 | 23 | 24 | 24 | 26  | 34  | 25  | 25 | 43  | 44  |
| SMMPA12209 | 18 | 14 | 19 | 84  | 92  | 59  | 44 | 51  | 46  |
| SMMPA12210 | 22 | 16 | 15 | 135 | 121 | 113 | 51 | 72  | 60  |
| SMMPA12211 | 16 | 19 | 18 | 84  | 64  | 56  | 31 | 46  | 32  |
| SMMPA12212 | 23 | 31 | 12 | 124 | 104 | 76  | 41 | 56  | 53  |
| SMMPA12213 | 26 | 24 | 19 | 79  | 77  | 81  | 28 | 49  | 52  |
| SMMPA12214 | 30 | 26 | 14 | 310 | 315 | 261 | 99 | 150 | 112 |
| SMMPA12215 | 27 | 13 | 18 | 221 | 189 | 141 | 65 | 107 | 97  |
| SMMPA12216 | 30 | 19 | 16 | 40  | 50  | 35  | 32 | 28  | 29  |
| SMMPA12217 | 27 | 33 | 19 | 76  | 50  | 47  | 27 | 41  | 39  |
| SMMPA12218 | 10 | 17 | 13 | 133 | 137 | 78  | 34 | 54  | 56  |
| SMMPA12219 | 20 | 22 | 20 | 56  | 66  | 60  | 46 | 59  | 48  |
| SMMPA12220 | 21 | 19 | 15 | 63  | 58  | 40  | 42 | 52  | 50  |
| SMMPA12221 | 10 | 7  | 8  | 42  | 24  | 17  | 22 | 28  | 19  |

|            |    |    |    |     |     |     |     |     |     |
|------------|----|----|----|-----|-----|-----|-----|-----|-----|
| SMMPA12222 | 23 | 22 | 15 | 162 | 113 | 129 | 56  | 96  | 77  |
| SMMPA12223 | 20 | 33 | 21 | 71  | 67  | 58  | 48  | 53  | 48  |
| SMMPA12224 | 15 | 29 | 20 | 43  | 50  | 41  | 43  | 43  | 41  |
| SMMPA12225 | 17 | 19 | 16 | 21  | 27  | 22  | 12  | 15  | 10  |
| SMMPA12226 | 34 | 30 | 33 | 61  | 67  | 58  | 33  | 42  | 48  |
| SMMPA12227 | 35 | 32 | 16 | 159 | 154 | 92  | 58  | 86  | 79  |
| SMMPA12228 | 19 | 15 | 18 | 26  | 14  | 14  | 28  | 21  | 23  |
| SMMPA12229 | 18 | 23 | 25 | 29  | 37  | 31  | 31  | 31  | 24  |
| SMMPA12230 | 40 | 29 | 26 | 38  | 29  | 32  | 35  | 39  | 46  |
| SMMPA12231 | 6  | 0  | 3  | 3   | 7   | 6   | 8   | 7   | 13  |
| SMMPA12232 | 12 | 9  | 14 | 16  | 13  | 15  | 15  | 17  | 18  |
| SMMPA12233 | 13 | 18 | 15 | 21  | 29  | 19  | 14  | 27  | 11  |
| SMMPA12234 | 19 | 16 | 15 | 48  | 29  | 35  | 23  | 29  | 38  |
| SMMPA12235 | 22 | 26 | 22 | 38  | 34  | 29  | 28  | 45  | 41  |
| SMMPA12236 | 11 | 16 | 16 | 195 | 195 | 178 | 98  | 150 | 108 |
| SMMPA12237 | 9  | 13 | 15 | 545 | 554 | 460 | 302 | 418 | 365 |
| SMMPA12238 | 22 | 20 | 39 | 987 | 914 | 796 | 578 | 726 | 703 |
| SMMPA12239 | 19 | 22 | 21 | 39  | 28  | 29  | 32  | 28  | 29  |
| SMMPA12240 | 19 | 22 | 19 | 16  | 16  | 19  | 14  | 14  | 24  |
| SMMPA12241 | 24 | 23 | 15 | 36  | 39  | 40  | 18  | 33  | 37  |
| SMMPA12242 | 2  | 2  | 2  | 0   | 4   | 5   | 1   | 1   | 3   |
| SMMPA12243 | 18 | 11 | 26 | 34  | 29  | 28  | 17  | 18  | 27  |
| SMMPA12244 | 27 | 36 | 20 | 40  | 37  | 41  | 16  | 34  | 34  |
| SMMPA12245 | 14 | 18 | 17 | 39  | 47  | 26  | 30  | 39  | 21  |
| SMMPA12246 | 18 | 15 | 14 | 47  | 33  | 37  | 25  | 24  | 27  |
| SMMPA12247 | 16 | 18 | 13 | 35  | 37  | 23  | 22  | 23  | 24  |
| SMMPA12248 | 11 | 9  | 10 | 15  | 17  | 15  | 10  | 17  | 13  |
| SMMPA12249 | 7  | 10 | 8  | 34  | 29  | 22  | 12  | 18  | 17  |
| SMMPA12250 | 26 | 27 | 18 | 99  | 105 | 90  | 44  | 50  | 62  |
| SMMPA12251 | 15 | 26 | 17 | 106 | 152 | 117 | 45  | 54  | 39  |
| SMMPA12252 | 18 | 15 | 19 | 354 | 322 | 287 | 186 | 231 | 181 |
| SMMPA12253 | 16 | 16 | 15 | 55  | 41  | 36  | 35  | 36  | 33  |
| SMMPA12254 | 9  | 11 | 7  | 32  | 32  | 28  | 15  | 23  | 12  |
| SMMPA12255 | 20 | 17 | 26 | 104 | 103 | 69  | 41  | 56  | 44  |
| SMMPA12256 | 17 | 6  | 5  | 58  | 79  | 73  | 23  | 43  | 32  |
| SMMPA12257 | 8  | 19 | 16 | 106 | 101 | 64  | 42  | 54  | 46  |
| SMMPA12258 | 13 | 10 | 8  | 141 | 126 | 99  | 68  | 88  | 93  |
| SMMPA12259 | 10 | 19 | 13 | 36  | 28  | 28  | 19  | 27  | 31  |
| SMMPA12260 | 31 | 34 | 25 | 177 | 162 | 114 | 64  | 90  | 85  |
| SMMPA12261 | 21 | 17 | 9  | 174 | 152 | 119 | 56  | 86  | 70  |
| SMMPA12262 | 30 | 23 | 33 | 22  | 26  | 31  | 20  | 26  | 35  |

|            |    |    |    |     |     |     |     |     |     |
|------------|----|----|----|-----|-----|-----|-----|-----|-----|
| SMMPA12263 | 28 | 40 | 35 | 60  | 49  | 45  | 51  | 63  | 47  |
| SMMPA12264 | 12 | 11 | 18 | 31  | 26  | 33  | 12  | 13  | 18  |
| SMMPA12265 | 24 | 36 | 25 | 74  | 69  | 52  | 53  | 88  | 90  |
| SMMPA12266 | 25 | 32 | 31 | 50  | 37  | 36  | 31  | 37  | 42  |
| SMMPA12267 | 22 | 16 | 14 | 24  | 22  | 18  | 33  | 53  | 46  |
| SMMPA12268 | 10 | 13 | 14 | 36  | 33  | 34  | 30  | 28  | 23  |
| SMMPA12269 | 22 | 19 | 11 | 14  | 17  | 13  | 16  | 19  | 17  |
| SMMPA12270 | 28 | 28 | 25 | 509 | 450 | 398 | 271 | 378 | 347 |
| SMMPA12271 | 31 | 24 | 32 | 29  | 26  | 24  | 30  | 30  | 43  |
| SMMPA12272 | 32 | 18 | 24 | 29  | 27  | 19  | 24  | 25  | 39  |
| SMMPA12273 | 24 | 41 | 29 | 28  | 24  | 33  | 16  | 29  | 33  |
| SMMPA12274 | 22 | 18 | 20 | 20  | 17  | 19  | 30  | 29  | 32  |
| SMMPA12275 | 21 | 34 | 28 | 38  | 23  | 30  | 33  | 24  | 30  |
| SMMPA12276 | 27 | 27 | 24 | 18  | 18  | 22  | 25  | 33  | 32  |
| SMMPA12277 | 28 | 40 | 38 | 24  | 22  | 32  | 34  | 35  | 33  |
| SMMPA12278 | 43 | 39 | 49 | 34  | 24  | 34  | 36  | 44  | 37  |
| SMMPA12279 | 23 | 18 | 26 | 24  | 20  | 22  | 37  | 39  | 39  |
| SMMPA12280 | 15 | 13 | 11 | 49  | 35  | 26  | 33  | 49  | 39  |
| SMMPA12281 | 27 | 23 | 24 | 62  | 48  | 58  | 34  | 52  | 43  |
| SMMPA12282 | 18 | 19 | 20 | 28  | 29  | 27  | 21  | 40  | 32  |
| SMMPA12283 | 3  | 0  | 1  | 4   | 12  | 8   | 2   | 4   | 3   |
| SMMPA12284 | 15 | 12 | 9  | 16  | 21  | 20  | 15  | 17  | 20  |
| SMMPA12285 | 34 | 39 | 37 | 53  | 37  | 54  | 48  | 63  | 60  |
| SMMPA12286 | 19 | 27 | 23 | 115 | 131 | 104 | 78  | 103 | 95  |
| SMMPA12287 | 17 | 16 | 15 | 177 | 131 | 102 | 93  | 139 | 97  |
| SMMPA12288 | 12 | 16 | 10 | 56  | 42  | 34  | 26  | 47  | 27  |
| SMMPA12289 | 44 | 49 | 30 | 93  | 54  | 74  | 52  | 73  | 68  |
| SMMPA12290 | 15 | 18 | 17 | 30  | 33  | 25  | 28  | 30  | 47  |
| SMMPA12291 | 28 | 28 | 30 | 171 | 137 | 131 | 54  | 88  | 71  |
| SMMPA12292 | 17 | 17 | 22 | 114 | 133 | 76  | 44  | 37  | 32  |
| SMMPA12293 | 17 | 11 | 16 | 51  | 36  | 27  | 15  | 29  | 24  |
| SMMPA12294 | 8  | 10 | 5  | 48  | 46  | 32  | 12  | 23  | 27  |
| SMMPA12295 | 17 | 16 | 15 | 74  | 68  | 72  | 33  | 51  | 40  |
| SMMPA12296 | 18 | 19 | 17 | 32  | 37  | 19  | 23  | 39  | 32  |
| SMMPA12297 | 20 | 26 | 20 | 135 | 115 | 114 | 49  | 80  | 54  |
| SMMPA12298 | 7  | 6  | 6  | 36  | 32  | 31  | 17  | 17  | 11  |
| SMMPA12299 | 20 | 16 | 15 | 88  | 94  | 56  | 54  | 59  | 48  |
| SMMPA12300 | 22 | 20 | 16 | 33  | 23  | 34  | 28  | 36  | 40  |
| SMMPA12301 | 7  | 7  | 13 | 10  | 8   | 7   | 11  | 13  | 14  |
| SMMPA12302 | 20 | 28 | 16 | 159 | 122 | 109 | 91  | 109 | 96  |
| SMMPA12303 | 20 | 30 | 21 | 24  | 21  | 18  | 21  | 29  | 34  |

|            |    |    |    |     |     |     |     |     |     |
|------------|----|----|----|-----|-----|-----|-----|-----|-----|
| SMMPA12304 | 82 | 81 | 72 | 70  | 76  | 76  | 62  | 103 | 65  |
| SMMPA12305 | 16 | 16 | 20 | 74  | 72  | 47  | 22  | 31  | 29  |
| SMMPA12306 | 12 | 8  | 15 | 149 | 114 | 93  | 58  | 88  | 80  |
| SMMPA12307 | 11 | 14 | 14 | 339 | 357 | 314 | 204 | 281 | 231 |
| SMMPA12308 | 17 | 15 | 9  | 25  | 34  | 24  | 24  | 31  | 29  |
| SMMPA12309 | 39 | 41 | 27 | 147 | 161 | 120 | 85  | 105 | 107 |
| SMMPA12310 | 13 | 17 | 11 | 22  | 17  | 19  | 27  | 36  | 25  |
| SMMPA12311 | 23 | 27 | 21 | 161 | 109 | 93  | 50  | 53  | 43  |
| SMMPA12312 | 15 | 23 | 19 | 134 | 150 | 135 | 90  | 108 | 81  |
| SMMPA12313 | 32 | 15 | 21 | 188 | 161 | 141 | 98  | 146 | 108 |
| SMMPA12314 | 14 | 9  | 12 | 251 | 222 | 251 | 99  | 164 | 106 |
| SMMPA12315 | 8  | 8  | 13 | 14  | 14  | 13  | 17  | 12  | 8   |
| SMMPA12316 | 19 | 17 | 17 | 30  | 28  | 23  | 20  | 24  | 17  |
| SMMPA12317 | 18 | 13 | 20 | 24  | 15  | 17  | 18  | 15  | 20  |
| SMMPA12318 | 17 | 24 | 27 | 28  | 35  | 32  | 26  | 34  | 32  |
| SMMPA12319 | 28 | 29 | 23 | 66  | 54  | 40  | 32  | 45  | 45  |
| SMMPA12320 | 23 | 13 | 15 | 34  | 25  | 21  | 26  | 22  | 27  |
| SMMPA12321 | 17 | 12 | 22 | 18  | 13  | 13  | 17  | 19  | 24  |
| SMMPA12322 | 18 | 16 | 15 | 20  | 11  | 10  | 15  | 26  | 20  |
| SMMPA12323 | 25 | 11 | 14 | 23  | 26  | 19  | 25  | 23  | 28  |
| SMMPA12324 | 13 | 27 | 17 | 18  | 25  | 14  | 20  | 28  | 18  |
| SMMPA12325 | 14 | 25 | 17 | 37  | 18  | 21  | 43  | 41  | 40  |
| SMMPA12326 | 12 | 20 | 17 | 27  | 20  | 22  | 12  | 15  | 19  |
| SMMPA12327 | 22 | 22 | 26 | 31  | 29  | 20  | 29  | 26  | 20  |
| SMMPA12328 | 9  | 10 | 9  | 14  | 12  | 10  | 18  | 18  | 18  |
| SMMPA12329 | 9  | 19 | 10 | 10  | 10  | 17  | 16  | 23  | 14  |
| SMMPA12330 | 35 | 35 | 24 | 14  | 17  | 13  | 27  | 32  | 21  |
| SMMPA12331 | 18 | 14 | 19 | 22  | 18  | 13  | 22  | 30  | 19  |
| SMMPA12332 | 16 | 27 | 18 | 15  | 21  | 24  | 24  | 33  | 40  |
| SMMPA12333 | 20 | 28 | 26 | 21  | 25  | 26  | 39  | 47  | 25  |
| SMMPA12334 | 25 | 26 | 25 | 29  | 18  | 27  | 41  | 31  | 30  |
| SMMPA12335 | 25 | 23 | 21 | 202 | 172 | 150 | 83  | 111 | 104 |
| SMMPA12336 | 33 | 30 | 35 | 96  | 96  | 84  | 45  | 67  | 54  |
| SMMPA12337 | 32 | 32 | 19 | 48  | 48  | 43  | 37  | 41  | 25  |
| SMMPA12338 | 24 | 26 | 25 | 100 | 79  | 81  | 45  | 77  | 44  |
| SMMPA12339 | 21 | 21 | 24 | 159 | 136 | 97  | 44  | 69  | 67  |
| SMMPA12340 | 64 | 62 | 51 | 436 | 418 | 360 | 181 | 260 | 236 |
| SMMPA12341 | 19 | 21 | 24 | 195 | 179 | 171 | 78  | 125 | 114 |
| SMMPA12342 | 19 | 16 | 24 | 335 | 308 | 261 | 151 | 186 | 174 |
| SMMPA12343 | 26 | 23 | 20 | 491 | 410 | 380 | 173 | 222 | 205 |
| SMMPA12344 | 16 | 21 | 15 | 58  | 60  | 43  | 28  | 36  | 38  |

|            |    |    |    |     |     |     |     |     |     |
|------------|----|----|----|-----|-----|-----|-----|-----|-----|
| SMMPA12345 | 32 | 39 | 21 | 113 | 146 | 79  | 102 | 105 | 131 |
| SMMPA12346 | 23 | 30 | 19 | 54  | 41  | 34  | 40  | 39  | 44  |
| SMMPA12347 | 16 | 18 | 17 | 84  | 90  | 66  | 29  | 48  | 46  |
| SMMPA12348 | 23 | 24 | 17 | 78  | 77  | 65  | 44  | 66  | 62  |
| SMMPA12349 | 14 | 21 | 22 | 60  | 43  | 35  | 37  | 30  | 37  |
| SMMPA12350 | 14 | 23 | 19 | 29  | 24  | 20  | 16  | 30  | 28  |
| SMMPA12351 | 9  | 11 | 8  | 339 | 329 | 272 | 140 | 192 | 160 |
| SMMPA12352 | 45 | 44 | 44 | 191 | 150 | 117 | 92  | 122 | 131 |
| SMMPA12353 | 15 | 22 | 17 | 105 | 120 | 81  | 41  | 50  | 47  |
| SMMPA12354 | 16 | 14 | 15 | 54  | 49  | 41  | 29  | 26  | 51  |
| SMMPA12355 | 8  | 6  | 2  | 49  | 47  | 31  | 29  | 28  | 20  |
| SMMPA12356 | 8  | 10 | 6  | 20  | 17  | 14  | 12  | 14  | 18  |
| SMMPA12357 | 26 | 20 | 14 | 116 | 121 | 108 | 55  | 81  | 64  |
| SMMPA12358 | 20 | 27 | 24 | 190 | 183 | 156 | 108 | 145 | 123 |
| SMMPA12359 | 30 | 26 | 36 | 136 | 127 | 123 | 87  | 113 | 114 |
| SMMPA12360 | 10 | 10 | 19 | 73  | 52  | 53  | 46  | 50  | 60  |
| SMMPA12361 | 14 | 11 | 10 | 136 | 113 | 97  | 58  | 90  | 59  |
| SMMPA12362 | 11 | 11 | 10 | 69  | 60  | 39  | 33  | 59  | 45  |
| SMMPA12363 | 16 | 12 | 16 | 112 | 70  | 49  | 48  | 72  | 70  |
| SMMPA12364 | 10 | 3  | 8  | 25  | 20  | 21  | 11  | 10  | 10  |
| SMMPA12365 | 14 | 17 | 23 | 29  | 37  | 33  | 15  | 15  | 24  |
| SMMPA12366 | 18 | 13 | 25 | 24  | 32  | 17  | 26  | 35  | 22  |
| SMMPA12367 | 20 | 14 | 14 | 25  | 21  | 16  | 18  | 27  | 25  |
| SMMPA12368 | 16 | 19 | 14 | 28  | 26  | 18  | 16  | 26  | 22  |
| SMMPA12369 | 21 | 30 | 26 | 126 | 81  | 76  | 53  | 71  | 82  |
| SMMPA12370 | 26 | 12 | 17 | 19  | 19  | 14  | 15  | 26  | 20  |
| SMMPA12371 | 14 | 16 | 12 | 16  | 17  | 5   | 20  | 15  | 17  |
| SMMPA12372 | 19 | 22 | 17 | 33  | 32  | 25  | 22  | 40  | 29  |
| SMMPA12373 | 14 | 19 | 17 | 39  | 32  | 33  | 19  | 27  | 32  |
| SMMPA12374 | 14 | 12 | 13 | 20  | 24  | 16  | 18  | 28  | 19  |
| SMMPA12375 | 17 | 17 | 20 | 26  | 24  | 32  | 18  | 36  | 30  |
| SMMPA12376 | 18 | 26 | 28 | 87  | 82  | 56  | 20  | 46  | 61  |
| SMMPA12377 | 23 | 32 | 23 | 97  | 79  | 60  | 54  | 72  | 74  |
| SMMPA12378 | 8  | 8  | 17 | 16  | 25  | 20  | 14  | 16  | 26  |
| SMMPA12379 | 25 | 25 | 25 | 86  | 90  | 74  | 59  | 66  | 70  |
| SMMPA12380 | 6  | 6  | 6  | 14  | 13  | 14  | 23  | 21  | 13  |
| SMMPA12381 | 16 | 17 | 15 | 40  | 35  | 29  | 26  | 37  | 26  |
| SMMPA12382 | 23 | 21 | 22 | 45  | 40  | 26  | 21  | 29  | 26  |
| SMMPA12383 | 14 | 15 | 17 | 63  | 78  | 37  | 46  | 50  | 60  |
| SMMPA12384 | 19 | 25 | 15 | 270 | 230 | 196 | 97  | 146 | 113 |
| SMMPA12385 | 21 | 24 | 10 | 321 | 309 | 256 | 200 | 233 | 217 |

|            |    |    |    |     |     |     |     |     |     |
|------------|----|----|----|-----|-----|-----|-----|-----|-----|
| SMMPA12386 | 21 | 29 | 20 | 98  | 108 | 87  | 55  | 73  | 76  |
| SMMPA12387 | 18 | 19 | 16 | 104 | 113 | 90  | 35  | 71  | 74  |
| SMMPA12388 | 22 | 24 | 17 | 69  | 62  | 48  | 24  | 60  | 52  |
| SMMPA12389 | 17 | 17 | 9  | 125 | 101 | 95  | 59  | 67  | 86  |
| SMMPA12390 | 51 | 52 | 49 | 43  | 40  | 32  | 49  | 54  | 45  |
| SMMPA12391 | 18 | 18 | 13 | 17  | 19  | 9   | 15  | 18  | 26  |
| SMMPA12392 | 29 | 20 | 16 | 70  | 59  | 46  | 29  | 31  | 31  |
| SMMPA12393 | 18 | 30 | 36 | 89  | 83  | 57  | 58  | 60  | 58  |
| SMMPA12394 | 21 | 25 | 22 | 54  | 59  | 34  | 53  | 56  | 56  |
| SMMPA12395 | 19 | 22 | 25 | 48  | 35  | 21  | 29  | 42  | 38  |
| SMMPA12396 | 14 | 28 | 21 | 44  | 34  | 25  | 41  | 30  | 38  |
| SMMPA12397 | 11 | 12 | 17 | 26  | 30  | 22  | 18  | 30  | 22  |
| SMMPA12398 | 8  | 14 | 17 | 64  | 61  | 49  | 29  | 36  | 37  |
| SMMPA12399 | 30 | 32 | 30 | 63  | 60  | 35  | 50  | 58  | 47  |
| SMMPA12400 | 26 | 20 | 15 | 39  | 38  | 19  | 22  | 37  | 31  |
| SMMPA12401 | 36 | 31 | 33 | 73  | 74  | 61  | 58  | 74  | 50  |
| SMMPA12402 | 10 | 15 | 11 | 33  | 43  | 21  | 20  | 26  | 29  |
| SMMPA12403 | 33 | 34 | 31 | 112 | 113 | 59  | 38  | 50  | 51  |
| SMMPA12404 | 10 | 12 | 13 | 17  | 17  | 15  | 10  | 22  | 11  |
| SMMPA12405 | 20 | 20 | 31 | 36  | 40  | 41  | 20  | 38  | 41  |
| SMMPA12406 | 22 | 29 | 22 | 29  | 31  | 28  | 23  | 37  | 23  |
| SMMPA12407 | 13 | 14 | 9  | 6   | 7   | 6   | 11  | 16  | 12  |
| SMMPA12408 | 10 | 14 | 7  | 11  | 4   | 9   | 14  | 12  | 18  |
| SMMPA12409 | 30 | 19 | 17 | 31  | 15  | 33  | 25  | 22  | 24  |
| SMMPA12410 | 2  | 2  | 2  | 8   | 7   | 16  | 5   | 7   | 6   |
| SMMPA12411 | 13 | 15 | 15 | 38  | 37  | 51  | 13  | 18  | 18  |
| SMMPA12412 | 6  | 12 | 13 | 64  | 67  | 62  | 40  | 45  | 51  |
| SMMPA12413 | 21 | 19 | 29 | 145 | 159 | 125 | 70  | 101 | 80  |
| SMMPA12414 | 13 | 13 | 9  | 31  | 27  | 22  | 17  | 30  | 26  |
| SMMPA12415 | 35 | 30 | 36 | 99  | 80  | 72  | 47  | 66  | 54  |
| SMMPA12416 | 33 | 38 | 31 | 25  | 34  | 31  | 27  | 18  | 32  |
| SMMPA12417 | 57 | 47 | 43 | 480 | 421 | 386 | 193 | 256 | 213 |
| SMMPA12418 | 23 | 16 | 19 | 32  | 33  | 22  | 19  | 23  | 18  |
| SMMPA12419 | 42 | 55 | 49 | 50  | 51  | 62  | 56  | 70  | 77  |
| SMMPA12420 | 30 | 44 | 38 | 179 | 178 | 122 | 85  | 94  | 114 |
| SMMPA12421 | 55 | 49 | 46 | 302 | 259 | 249 | 136 | 207 | 151 |
| SMMPA12422 | 1  | 3  | 2  | 5   | 6   | 3   | 4   | 5   | 6   |
| SMMPA12423 | 49 | 46 | 38 | 298 | 302 | 196 | 120 | 179 | 161 |
| SMMPA12424 | 46 | 27 | 23 | 235 | 224 | 218 | 143 | 160 | 137 |
| SMMPA12425 | 27 | 38 | 21 | 269 | 248 | 210 | 136 | 163 | 167 |
| SMMPA12426 | 70 | 54 | 49 | 145 | 144 | 141 | 71  | 115 | 88  |



|            |     |    |    |     |     |     |     |     |     |
|------------|-----|----|----|-----|-----|-----|-----|-----|-----|
| SMMPA12427 | 44  | 44 | 37 | 404 | 394 | 283 | 202 | 253 | 263 |
| SMMPA12428 | 35  | 50 | 39 | 176 | 150 | 115 | 91  | 121 | 112 |
| SMMPA12429 | 27  | 36 | 29 | 86  | 103 | 69  | 53  | 71  | 74  |
| SMMPA12430 | 63  | 73 | 61 | 43  | 42  | 43  | 55  | 72  | 82  |
| SMMPA12431 | 21  | 30 | 25 | 44  | 48  | 41  | 31  | 54  | 38  |
| SMMPA12432 | 30  | 25 | 27 | 52  | 51  | 38  | 27  | 33  | 51  |
| SMMPA12433 | 27  | 20 | 19 | 60  | 61  | 51  | 50  | 45  | 50  |
| SMMPA12434 | 17  | 19 | 17 | 37  | 32  | 30  | 34  | 41  | 31  |
| SMMPA12435 | 24  | 28 | 29 | 79  | 65  | 50  | 31  | 64  | 54  |
| SMMPA12436 | 28  | 20 | 28 | 123 | 129 | 78  | 55  | 89  | 83  |
| SMMPA12437 | 4   | 7  | 8  | 45  | 47  | 25  | 22  | 27  | 19  |
| SMMPA12438 | 8   | 2  | 6  | 23  | 17  | 15  | 17  | 21  | 24  |
| SMMPA12439 | 35  | 46 | 35 | 65  | 64  | 59  | 55  | 75  | 65  |
| SMMPA12440 | 100 | 81 | 79 | 194 | 193 | 165 | 146 | 177 | 181 |
| SMMPA12441 | 19  | 35 | 21 | 48  | 49  | 36  | 44  | 52  | 41  |
| SMMPA12442 | 20  | 22 | 13 | 174 | 132 | 90  | 83  | 115 | 105 |
| SMMPA12443 | 41  | 47 | 27 | 144 | 124 | 91  | 60  | 83  | 85  |
| SMMPA12444 | 45  | 25 | 26 | 70  | 52  | 39  | 54  | 65  | 81  |
| SMMPA12445 | 19  | 25 | 12 | 188 | 192 | 178 | 80  | 113 | 100 |
| SMMPA12446 | 25  | 35 | 29 | 202 | 169 | 111 | 125 | 162 | 129 |
| SMMPA12447 | 21  | 28 | 24 | 189 | 165 | 117 | 104 | 139 | 106 |
| SMMPA12448 | 15  | 20 | 21 | 132 | 86  | 81  | 95  | 147 | 121 |
| SMMPA12449 | 29  | 32 | 22 | 73  | 63  | 46  | 43  | 46  | 39  |
| SMMPA12450 | 13  | 15 | 17 | 38  | 38  | 26  | 21  | 30  | 36  |
| SMMPA12451 | 16  | 16 | 18 | 17  | 14  | 17  | 13  | 28  | 16  |
| SMMPA12452 | 31  | 36 | 25 | 36  | 38  | 39  | 36  | 35  | 42  |
| SMMPA12453 | 24  | 9  | 15 | 23  | 25  | 20  | 30  | 46  | 48  |
| SMMPA12454 | 25  | 24 | 11 | 38  | 31  | 34  | 35  | 43  | 28  |
| SMMPA12455 | 25  | 26 | 21 | 36  | 35  | 32  | 34  | 42  | 40  |
| SMMPA12456 | 18  | 15 | 20 | 74  | 66  | 49  | 41  | 47  | 61  |
| SMMPA12457 | 24  | 36 | 27 | 24  | 21  | 16  | 29  | 35  | 22  |
| SMMPA12458 | 16  | 17 | 26 | 15  | 8   | 14  | 21  | 38  | 31  |
| SMMPA12459 | 24  | 37 | 33 | 71  | 105 | 66  | 49  | 54  | 68  |
| SMMPA12460 | 20  | 17 | 13 | 96  | 85  | 73  | 94  | 86  | 100 |
| SMMPA12461 | 23  | 24 | 27 | 40  | 31  | 26  | 28  | 22  | 29  |
| SMMPA12462 | 12  | 10 | 12 | 17  | 19  | 19  | 13  | 28  | 17  |
| SMMPA12463 | 25  | 32 | 26 | 35  | 33  | 40  | 25  | 38  | 29  |
| SMMPA12464 | 10  | 23 | 18 | 26  | 22  | 24  | 21  | 19  | 21  |
| SMMPA12465 | 10  | 19 | 22 | 43  | 39  | 41  | 28  | 36  | 51  |
| SMMPA12466 | 33  | 35 | 15 | 29  | 20  | 20  | 33  | 38  | 41  |
| SMMPA12467 | 16  | 26 | 18 | 69  | 55  | 43  | 29  | 44  | 56  |

|            |     |     |    |     |     |     |     |     |     |
|------------|-----|-----|----|-----|-----|-----|-----|-----|-----|
| SMMPA12468 | 20  | 16  | 17 | 87  | 73  | 58  | 44  | 65  | 52  |
| SMMPA12469 | 17  | 22  | 27 | 59  | 72  | 54  | 32  | 68  | 45  |
| SMMPA12470 | 24  | 25  | 22 | 65  | 39  | 44  | 34  | 58  | 47  |
| SMMPA12471 | 32  | 23  | 24 | 33  | 21  | 38  | 31  | 56  | 34  |
| SMMPA12472 | 48  | 40  | 34 | 49  | 46  | 35  | 45  | 53  | 51  |
| SMMPA12473 | 34  | 46  | 42 | 78  | 55  | 43  | 30  | 69  | 66  |
| SMMPA12474 | 13  | 19  | 20 | 192 | 195 | 157 | 84  | 106 | 116 |
| SMMPA12475 | 50  | 58  | 42 | 78  | 68  | 68  | 53  | 65  | 72  |
| SMMPA12476 | 21  | 22  | 19 | 31  | 30  | 17  | 29  | 29  | 27  |
| SMMPA12477 | 49  | 54  | 63 | 91  | 93  | 65  | 49  | 95  | 84  |
| SMMPA12478 | 38  | 54  | 51 | 303 | 258 | 192 | 155 | 200 | 213 |
| SMMPA12479 | 37  | 39  | 38 | 46  | 51  | 51  | 28  | 42  | 30  |
| SMMPA12480 | 23  | 25  | 24 | 47  | 37  | 41  | 52  | 53  | 62  |
| SMMPA12481 | 22  | 21  | 18 | 54  | 58  | 57  | 26  | 35  | 33  |
| SMMPA12482 | 12  | 13  | 15 | 59  | 59  | 51  | 23  | 35  | 31  |
| SMMPA12483 | 10  | 13  | 10 | 40  | 30  | 28  | 22  | 17  | 12  |
| SMMPA12484 | 27  | 27  | 23 | 25  | 29  | 25  | 18  | 21  | 25  |
| SMMPA12485 | 22  | 23  | 19 | 72  | 47  | 58  | 47  | 51  | 59  |
| SMMPA12486 | 11  | 16  | 19 | 37  | 43  | 39  | 39  | 30  | 29  |
| SMMPA12487 | 66  | 75  | 62 | 141 | 147 | 128 | 88  | 125 | 91  |
| SMMPA12488 | 8   | 11  | 13 | 60  | 46  | 29  | 19  | 31  | 30  |
| SMMPA12489 | 142 | 127 | 95 | 79  | 73  | 68  | 75  | 105 | 127 |
| SMMPA12490 | 42  | 39  | 34 | 330 | 279 | 234 | 95  | 130 | 110 |
| SMMPA12491 | 51  | 40  | 44 | 111 | 96  | 83  | 69  | 96  | 86  |
| SMMPA12492 | 99  | 89  | 92 | 206 | 214 | 160 | 124 | 153 | 167 |
| SMMPA12493 | 30  | 33  | 20 | 43  | 40  | 36  | 27  | 43  | 31  |
| SMMPA12494 | 74  | 94  | 70 | 62  | 64  | 55  | 55  | 78  | 84  |
| SMMPA12495 | 59  | 65  | 53 | 41  | 36  | 41  | 47  | 61  | 60  |
| SMMPA12496 | 38  | 49  | 45 | 305 | 279 | 241 | 160 | 213 | 202 |
| SMMPA12497 | 47  | 46  | 31 | 230 | 236 | 159 | 113 | 178 | 154 |
| SMMPA12498 | 77  | 78  | 85 | 109 | 105 | 83  | 82  | 108 | 116 |
| SMMPA12499 | 43  | 48  | 50 | 122 | 92  | 84  | 57  | 53  | 60  |
| SMMPA12500 | 38  | 38  | 31 | 107 | 79  | 75  | 52  | 55  | 56  |
| SMMPA12501 | 13  | 30  | 27 | 123 | 127 | 91  | 46  | 49  | 54  |
| SMMPA12502 | 20  | 24  | 15 | 62  | 56  | 42  | 45  | 39  | 49  |
| SMMPA12503 | 17  | 16  | 24 | 284 | 312 | 260 | 153 | 203 | 172 |
| SMMPA12504 | 15  | 11  | 12 | 581 | 605 | 627 | 264 | 363 | 296 |
| SMMPA12505 | 13  | 19  | 9  | 123 | 77  | 76  | 50  | 78  | 71  |
| SMMPA12506 | 15  | 22  | 21 | 850 | 840 | 797 | 405 | 593 | 516 |
| SMMPA12507 | 20  | 18  | 14 | 485 | 467 | 450 | 314 | 389 | 356 |
| SMMPA12508 | 19  | 19  | 20 | 544 | 504 | 495 | 190 | 245 | 193 |

|            |    |    |    |     |     |     |     |     |     |
|------------|----|----|----|-----|-----|-----|-----|-----|-----|
| SMMPA12509 | 29 | 18 | 13 | 335 | 317 | 266 | 136 | 175 | 147 |
| SMMPA12510 | 23 | 21 | 18 | 381 | 364 | 314 | 141 | 187 | 150 |
| SMMPA12511 | 9  | 18 | 6  | 189 | 163 | 146 | 101 | 114 | 98  |
| SMMPA12512 | 9  | 8  | 11 | 23  | 13  | 16  | 12  | 29  | 30  |
| SMMPA12513 | 18 | 13 | 27 | 38  | 41  | 34  | 26  | 33  | 41  |
| SMMPA12514 | 32 | 39 | 33 | 129 | 127 | 103 | 61  | 57  | 58  |
| SMMPA12515 | 19 | 30 | 18 | 52  | 54  | 34  | 30  | 38  | 41  |
| SMMPA12516 | 27 | 24 | 18 | 101 | 91  | 72  | 58  | 74  | 80  |
| SMMPA12517 | 14 | 11 | 20 | 52  | 56  | 35  | 25  | 41  | 37  |
| SMMPA12518 | 11 | 17 | 18 | 34  | 28  | 32  | 35  | 32  | 34  |
| SMMPA12519 | 14 | 18 | 16 | 57  | 55  | 45  | 33  | 63  | 47  |
| SMMPA12520 | 10 | 10 | 11 | 23  | 15  | 15  | 13  | 16  | 15  |
| SMMPA12521 | 21 | 14 | 20 | 68  | 59  | 43  | 51  | 52  | 55  |
| SMMPA12522 | 23 | 33 | 23 | 82  | 68  | 67  | 46  | 74  | 51  |
| SMMPA12523 | 4  | 5  | 8  | 18  | 18  | 10  | 12  | 18  | 13  |
| SMMPA12524 | 17 | 25 | 13 | 18  | 21  | 15  | 14  | 15  | 22  |
| SMMPA12525 | 12 | 11 | 11 | 18  | 19  | 13  | 27  | 21  | 22  |
| SMMPA12526 | 24 | 27 | 22 | 41  | 40  | 36  | 32  | 42  | 41  |
| SMMPA12527 | 23 | 29 | 16 | 57  | 56  | 49  | 28  | 52  | 66  |
| SMMPA12528 | 19 | 24 | 20 | 30  | 26  | 32  | 25  | 38  | 28  |
| SMMPA12529 | 12 | 16 | 21 | 28  | 23  | 32  | 24  | 26  | 34  |
| SMMPA12530 | 40 | 40 | 38 | 22  | 27  | 26  | 44  | 50  | 57  |
| SMMPA12531 | 13 | 14 | 8  | 29  | 27  | 24  | 24  | 40  | 22  |
| SMMPA12532 | 15 | 23 | 23 | 30  | 36  | 28  | 30  | 35  | 19  |
| SMMPA12533 | 34 | 37 | 35 | 38  | 46  | 38  | 38  | 52  | 53  |
| SMMPA12534 | 79 | 84 | 72 | 144 | 151 | 102 | 112 | 170 | 164 |
| SMMPA12535 | 18 | 25 | 18 | 122 | 90  | 82  | 72  | 104 | 71  |
| SMMPA12536 | 20 | 31 | 11 | 222 | 167 | 149 | 139 | 165 | 180 |
| SMMPA12537 | 40 | 43 | 33 | 60  | 47  | 54  | 49  | 54  | 31  |
| SMMPA12538 | 43 | 35 | 36 | 73  | 82  | 74  | 38  | 55  | 49  |
| SMMPA12539 | 16 | 11 | 9  | 10  | 16  | 12  | 14  | 11  | 19  |
| SMMPA12540 | 26 | 37 | 27 | 47  | 46  | 33  | 31  | 26  | 36  |
| SMMPA12541 | 39 | 43 | 48 | 40  | 38  | 43  | 42  | 48  | 35  |
| SMMPA12542 | 22 | 25 | 23 | 31  | 34  | 21  | 40  | 50  | 48  |
| SMMPA12543 | 23 | 20 | 21 | 29  | 24  | 32  | 28  | 27  | 23  |
| SMMPA12544 | 18 | 26 | 13 | 35  | 27  | 36  | 21  | 25  | 30  |
| SMMPA12545 | 22 | 20 | 22 | 61  | 53  | 44  | 31  | 42  | 30  |
| SMMPA12546 | 32 | 22 | 20 | 34  | 20  | 27  | 16  | 21  | 17  |
| SMMPA12547 | 15 | 9  | 14 | 39  | 31  | 18  | 29  | 36  | 48  |
| SMMPA12548 | 16 | 19 | 13 | 50  | 44  | 33  | 36  | 39  | 44  |
| SMMPA12549 | 17 | 35 | 11 | 183 | 157 | 126 | 75  | 93  | 97  |

|            |    |    |    |     |     |     |     |     |     |
|------------|----|----|----|-----|-----|-----|-----|-----|-----|
| SMMPA12550 | 7  | 16 | 7  | 61  | 60  | 54  | 28  | 35  | 24  |
| SMMPA12551 | 4  | 4  | 9  | 15  | 15  | 10  | 9   | 8   | 11  |
| SMMPA12552 | 6  | 7  | 9  | 29  | 26  | 29  | 14  | 20  | 15  |
| SMMPA12553 | 6  | 11 | 12 | 25  | 21  | 33  | 14  | 21  | 21  |
| SMMPA12554 | 14 | 14 | 14 | 34  | 32  | 33  | 23  | 19  | 36  |
| SMMPA12555 | 11 | 16 | 10 | 39  | 35  | 35  | 25  | 24  | 23  |
| SMMPA12556 | 4  | 5  | 6  | 13  | 14  | 13  | 9   | 5   | 14  |
| SMMPA12557 | 13 | 11 | 8  | 26  | 45  | 35  | 27  | 27  | 31  |
| SMMPA12558 | 67 | 77 | 76 | 55  | 56  | 45  | 51  | 62  | 85  |
| SMMPA12559 | 36 | 44 | 32 | 110 | 100 | 86  | 76  | 87  | 94  |
| SMMPA12560 | 24 | 21 | 16 | 66  | 54  | 50  | 81  | 108 | 97  |
| SMMPA12561 | 10 | 19 | 17 | 50  | 37  | 29  | 27  | 41  | 42  |
| SMMPA12562 | 33 | 41 | 36 | 81  | 73  | 55  | 50  | 67  | 51  |
| SMMPA12563 | 28 | 23 | 22 | 94  | 87  | 56  | 67  | 107 | 104 |
| SMMPA12564 | 26 | 24 | 18 | 49  | 41  | 37  | 33  | 39  | 47  |
| SMMPA12565 | 45 | 48 | 22 | 106 | 87  | 65  | 42  | 45  | 49  |
| SMMPA12566 | 37 | 37 | 31 | 67  | 41  | 38  | 47  | 61  | 45  |
| SMMPA12567 | 1  | 0  | 0  | 2   | 3   | 1   | 0   | 2   | 0   |
| SMMPA12568 | 14 | 8  | 6  | 13  | 13  | 13  | 2   | 16  | 13  |
| SMMPA12569 | 16 | 15 | 21 | 31  | 24  | 21  | 19  | 33  | 38  |
| SMMPA12570 | 20 | 31 | 22 | 37  | 47  | 27  | 33  | 41  | 24  |
| SMMPA12571 | 7  | 5  | 5  | 8   | 8   | 10  | 8   | 10  | 15  |
| SMMPA12572 | 17 | 17 | 25 | 46  | 39  | 28  | 20  | 36  | 27  |
| SMMPA12573 | 31 | 37 | 36 | 43  | 26  | 30  | 42  | 62  | 47  |
| SMMPA12574 | 18 | 25 | 14 | 18  | 14  | 32  | 17  | 27  | 33  |
| SMMPA12575 | 26 | 22 | 23 | 29  | 24  | 29  | 30  | 38  | 41  |
| SMMPA12576 | 22 | 20 | 25 | 33  | 33  | 20  | 21  | 38  | 32  |
| SMMPA12577 | 19 | 27 | 17 | 27  | 24  | 24  | 35  | 56  | 58  |
| SMMPA12578 | 24 | 21 | 15 | 28  | 22  | 25  | 19  | 26  | 24  |
| SMMPA12579 | 30 | 33 | 33 | 35  | 28  | 27  | 49  | 48  | 36  |
| SMMPA12580 | 14 | 13 | 20 | 16  | 15  | 19  | 17  | 16  | 27  |
| SMMPA12581 | 29 | 25 | 22 | 19  | 42  | 31  | 26  | 30  | 37  |
| SMMPA12582 | 23 | 10 | 17 | 25  | 16  | 19  | 18  | 32  | 33  |
| SMMPA12583 | 15 | 18 | 13 | 20  | 19  | 22  | 26  | 26  | 34  |
| SMMPA12584 | 19 | 17 | 18 | 138 | 125 | 92  | 60  | 73  | 66  |
| SMMPA12585 | 22 | 24 | 13 | 74  | 71  | 58  | 35  | 42  | 44  |
| SMMPA12586 | 24 | 33 | 20 | 335 | 287 | 200 | 193 | 239 | 205 |
| SMMPA12587 | 18 | 20 | 17 | 48  | 50  | 27  | 29  | 27  | 38  |
| SMMPA12588 | 25 | 24 | 22 | 241 | 200 | 180 | 137 | 185 | 168 |
| SMMPA12589 | 29 | 21 | 18 | 144 | 152 | 126 | 94  | 96  | 98  |
| SMMPA12590 | 16 | 18 | 15 | 308 | 256 | 222 | 120 | 149 | 128 |

|            |    |    |    |     |     |     |     |     |     |
|------------|----|----|----|-----|-----|-----|-----|-----|-----|
| SMMPA12591 | 23 | 30 | 18 | 335 | 309 | 245 | 127 | 176 | 154 |
| SMMPA12592 | 3  | 1  | 1  | 19  | 12  | 16  | 12  | 15  | 22  |
| SMMPA12593 | 12 | 14 | 7  | 113 | 115 | 117 | 69  | 103 | 77  |
| SMMPA12594 | 42 | 56 | 54 | 352 | 349 | 312 | 175 | 209 | 178 |
| SMMPA12595 | 19 | 26 | 22 | 78  | 66  | 57  | 25  | 55  | 52  |
| SMMPA12596 | 23 | 34 | 27 | 38  | 33  | 36  | 35  | 44  | 44  |
| SMMPA12597 | 22 | 16 | 20 | 32  | 27  | 19  | 26  | 31  | 32  |
| SMMPA12598 | 7  | 10 | 1  | 10  | 13  | 11  | 12  | 21  | 2   |
| SMMPA12599 | 15 | 21 | 5  | 21  | 19  | 27  | 20  | 28  | 37  |
| SMMPA12600 | 16 | 16 | 20 | 18  | 18  | 17  | 25  | 22  | 25  |
| SMMPA12601 | 19 | 17 | 22 | 39  | 58  | 35  | 31  | 37  | 42  |
| SMMPA12602 | 8  | 10 | 5  | 24  | 26  | 25  | 9   | 14  | 10  |
| SMMPA12603 | 15 | 10 | 13 | 43  | 36  | 37  | 30  | 37  | 27  |
| SMMPA12604 | 21 | 23 | 24 | 32  | 23  | 27  | 31  | 43  | 38  |
| SMMPA12605 | 18 | 28 | 11 | 73  | 60  | 46  | 60  | 85  | 92  |
| SMMPA12606 | 24 | 23 | 21 | 32  | 30  | 34  | 16  | 40  | 28  |
| SMMPA12607 | 14 | 16 | 23 | 13  | 18  | 15  | 25  | 26  | 24  |
| SMMPA12608 | 11 | 15 | 6  | 7   | 12  | 13  | 11  | 13  | 15  |
| SMMPA12609 | 13 | 10 | 12 | 25  | 21  | 15  | 22  | 20  | 25  |
| SMMPA12610 | 12 | 14 | 16 | 27  | 21  | 22  | 24  | 21  | 18  |
| SMMPA12611 | 8  | 12 | 8  | 37  | 39  | 23  | 13  | 21  | 32  |
| SMMPA12612 | 14 | 12 | 15 | 16  | 17  | 13  | 15  | 27  | 21  |
| SMMPA12613 | 7  | 6  | 6  | 8   | 6   | 6   | 14  | 10  | 16  |
| SMMPA12614 | 5  | 9  | 2  | 6   | 7   | 3   | 4   | 5   | 11  |
| SMMPA12615 | 23 | 28 | 16 | 110 | 102 | 87  | 67  | 91  | 89  |
| SMMPA12616 | 8  | 6  | 4  | 8   | 10  | 10  | 12  | 19  | 24  |
| SMMPA12617 | 34 | 33 | 22 | 73  | 85  | 64  | 37  | 42  | 36  |
| SMMPA12618 | 21 | 26 | 16 | 26  | 35  | 30  | 15  | 23  | 30  |
| SMMPA12619 | 26 | 21 | 20 | 46  | 48  | 29  | 29  | 42  | 46  |
| SMMPA12620 | 32 | 31 | 40 | 77  | 66  | 62  | 49  | 55  | 52  |
| SMMPA12621 | 19 | 18 | 21 | 74  | 50  | 54  | 30  | 43  | 44  |
| SMMPA12622 | 33 | 28 | 17 | 46  | 41  | 41  | 49  | 51  | 60  |
| SMMPA12623 | 14 | 18 | 18 | 26  | 28  | 21  | 25  | 53  | 20  |
| SMMPA12624 | 23 | 24 | 21 | 109 | 98  | 91  | 57  | 78  | 74  |
| SMMPA12625 | 19 | 20 | 21 | 31  | 29  | 30  | 31  | 47  | 30  |
| SMMPA12626 | 11 | 17 | 10 | 24  | 21  | 25  | 23  | 13  | 27  |
| SMMPA12627 | 13 | 23 | 8  | 25  | 25  | 43  | 29  | 33  | 30  |
| SMMPA12628 | 14 | 16 | 13 | 31  | 34  | 35  | 28  | 30  | 23  |
| SMMPA12629 | 26 | 29 | 25 | 86  | 108 | 66  | 60  | 70  | 60  |
| SMMPA12630 | 16 | 22 | 9  | 130 | 122 | 110 | 42  | 60  | 46  |
| SMMPA12631 | 22 | 32 | 27 | 232 | 228 | 166 | 97  | 126 | 112 |

|            |    |    |    |     |     |     |     |     |     |
|------------|----|----|----|-----|-----|-----|-----|-----|-----|
| SMMPA12632 | 32 | 29 | 31 | 69  | 53  | 46  | 43  | 51  | 66  |
| SMMPA12633 | 19 | 20 | 27 | 141 | 114 | 77  | 79  | 97  | 81  |
| SMMPA12634 | 12 | 25 | 23 | 23  | 25  | 26  | 20  | 38  | 32  |
| SMMPA12635 | 38 | 48 | 41 | 29  | 30  | 41  | 50  | 47  | 41  |
| SMMPA12636 | 18 | 15 | 12 | 310 | 236 | 231 | 84  | 99  | 88  |
| SMMPA12637 | 19 | 27 | 30 | 479 | 543 | 394 | 169 | 278 | 216 |
| SMMPA12638 | 35 | 27 | 36 | 254 | 245 | 203 | 99  | 145 | 130 |
| SMMPA12639 | 16 | 9  | 12 | 259 | 266 | 251 | 107 | 133 | 121 |
| SMMPA12640 | 42 | 31 | 35 | 619 | 637 | 530 | 243 | 338 | 311 |
| SMMPA12641 | 10 | 14 | 10 | 230 | 213 | 180 | 73  | 87  | 79  |
| SMMPA12642 | 4  | 6  | 5  | 96  | 88  | 78  | 35  | 50  | 42  |
| SMMPA12643 | 33 | 40 | 31 | 324 | 259 | 287 | 151 | 216 | 173 |
| SMMPA12644 | 19 | 23 | 26 | 55  | 44  | 35  | 28  | 62  | 48  |
| SMMPA12645 | 21 | 23 | 21 | 36  | 26  | 33  | 32  | 23  | 40  |
| SMMPA12646 | 24 | 27 | 24 | 37  | 41  | 26  | 39  | 63  | 53  |
| SMMPA12647 | 14 | 13 | 20 | 15  | 16  | 19  | 14  | 27  | 15  |
| SMMPA12648 | 14 | 16 | 19 | 11  | 15  | 7   | 20  | 25  | 15  |
| SMMPA12649 | 25 | 12 | 9  | 16  | 10  | 13  | 18  | 20  | 13  |
| SMMPA12650 | 29 | 29 | 21 | 21  | 28  | 21  | 31  | 43  | 35  |
| SMMPA12651 | 29 | 25 | 25 | 36  | 17  | 21  | 25  | 42  | 35  |
| SMMPA12652 | 12 | 17 | 9  | 15  | 16  | 10  | 12  | 16  | 23  |
| SMMPA12653 | 16 | 10 | 11 | 19  | 11  | 19  | 18  | 14  | 21  |
| SMMPA12654 | 21 | 12 | 11 | 11  | 10  | 3   | 19  | 28  | 21  |
| SMMPA12655 | 33 | 30 | 38 | 134 | 136 | 91  | 68  | 105 | 109 |
| SMMPA12656 | 20 | 21 | 12 | 42  | 42  | 28  | 22  | 38  | 43  |
| SMMPA12657 | 27 | 33 | 31 | 29  | 16  | 15  | 38  | 32  | 41  |
| SMMPA12658 | 21 | 22 | 19 | 31  | 22  | 30  | 31  | 29  | 29  |
| SMMPA12659 | 10 | 13 | 15 | 24  | 32  | 17  | 25  | 26  | 24  |
| SMMPA12660 | 18 | 25 | 24 | 29  | 30  | 19  | 33  | 22  | 32  |
| SMMPA12661 | 21 | 13 | 18 | 9   | 15  | 11  | 21  | 17  | 21  |
| SMMPA12662 | 18 | 21 | 15 | 30  | 36  | 18  | 27  | 34  | 38  |
| SMMPA12663 | 23 | 25 | 21 | 32  | 33  | 29  | 25  | 41  | 43  |
| SMMPA12664 | 21 | 21 | 25 | 44  | 45  | 44  | 34  | 60  | 56  |
| SMMPA12665 | 18 | 24 | 31 | 37  | 32  | 27  | 26  | 33  | 30  |
| SMMPA12666 | 23 | 22 | 19 | 45  | 43  | 36  | 22  | 31  | 30  |
| SMMPA12667 | 25 | 23 | 22 | 30  | 30  | 35  | 26  | 40  | 37  |
| SMMPA12668 | 29 | 16 | 22 | 105 | 105 | 91  | 55  | 77  | 66  |
| SMMPA12669 | 21 | 20 | 29 | 42  | 39  | 34  | 26  | 45  | 35  |
| SMMPA12670 | 9  | 14 | 17 | 19  | 9   | 11  | 16  | 27  | 9   |
| SMMPA12671 | 17 | 15 | 17 | 21  | 12  | 21  | 22  | 29  | 27  |
| SMMPA12672 | 15 | 20 | 22 | 38  | 22  | 22  | 24  | 32  | 39  |

|            |    |    |    |     |     |     |    |     |     |
|------------|----|----|----|-----|-----|-----|----|-----|-----|
| SMMPA12673 | 16 | 12 | 5  | 14  | 11  | 7   | 16 | 16  | 19  |
| SMMPA12674 | 19 | 23 | 18 | 33  | 28  | 32  | 24 | 33  | 27  |
| SMMPA12675 | 10 | 14 | 9  | 18  | 13  | 10  | 16 | 29  | 16  |
| SMMPA12676 | 20 | 14 | 11 | 32  | 27  | 22  | 16 | 22  | 31  |
| SMMPA12677 | 12 | 19 | 21 | 16  | 16  | 21  | 24 | 18  | 26  |
| SMMPA12678 | 22 | 19 | 12 | 28  | 25  | 15  | 18 | 34  | 26  |
| SMMPA12679 | 13 | 11 | 20 | 12  | 19  | 12  | 20 | 35  | 16  |
| SMMPA12680 | 4  | 2  | 6  | 5   | 5   | 7   | 3  | 6   | 8   |
| SMMPA12681 | 32 | 27 | 19 | 115 | 93  | 64  | 49 | 55  | 66  |
| SMMPA12682 | 20 | 19 | 15 | 25  | 26  | 21  | 20 | 18  | 16  |
| SMMPA12683 | 27 | 22 | 15 | 49  | 49  | 43  | 42 | 44  | 43  |
| SMMPA12684 | 34 | 18 | 18 | 87  | 75  | 57  | 52 | 88  | 54  |
| SMMPA12685 | 9  | 19 | 13 | 238 | 213 | 162 | 65 | 110 | 100 |
| SMMPA12686 | 11 | 29 | 18 | 61  | 57  | 55  | 41 | 47  | 56  |
| SMMPA12687 | 7  | 9  | 8  | 32  | 23  | 23  | 17 | 28  | 18  |
| SMMPA12688 | 12 | 18 | 14 | 22  | 19  | 14  | 22 | 25  | 31  |
| SMMPA12689 | 37 | 32 | 25 | 40  | 31  | 23  | 21 | 40  | 34  |
| SMMPA12690 | 24 | 17 | 26 | 29  | 20  | 26  | 43 | 51  | 46  |
| SMMPA12691 | 26 | 35 | 28 | 54  | 53  | 46  | 36 | 45  | 37  |
| SMMPA12692 | 19 | 32 | 25 | 26  | 18  | 20  | 13 | 30  | 28  |
| SMMPA12693 | 21 | 16 | 18 | 14  | 18  | 18  | 15 | 16  | 22  |
| SMMPA12694 | 12 | 7  | 5  | 10  | 11  | 7   | 4  | 10  | 17  |
| SMMPA12695 | 22 | 20 | 19 | 23  | 21  | 26  | 20 | 18  | 26  |
| SMMPA12696 | 15 | 9  | 10 | 14  | 15  | 17  | 22 | 18  | 15  |
| SMMPA12697 | 19 | 19 | 21 | 24  | 19  | 18  | 18 | 35  | 22  |
| SMMPA12698 | 18 | 15 | 13 | 164 | 162 | 129 | 61 | 67  | 75  |
| SMMPA12699 | 32 | 25 | 20 | 55  | 47  | 32  | 40 | 44  | 49  |
| SMMPA12700 | 10 | 17 | 13 | 9   | 8   | 15  | 22 | 18  | 15  |
| SMMPA12701 | 10 | 7  | 11 | 4   | 3   | 12  | 9  | 12  | 10  |
| SMMPA12702 | 32 | 32 | 32 | 30  | 32  | 46  | 36 | 49  | 36  |
| SMMPA12703 | 7  | 16 | 12 | 17  | 12  | 15  | 7  | 11  | 11  |
| SMMPA12704 | 19 | 18 | 11 | 22  | 12  | 21  | 21 | 28  | 27  |
| SMMPA12705 | 13 | 9  | 12 | 22  | 17  | 8   | 9  | 12  | 21  |
| SMMPA12706 | 19 | 23 | 16 | 3   | 16  | 8   | 13 | 17  | 14  |
| SMMPA12707 | 11 | 14 | 14 | 20  | 17  | 9   | 11 | 13  | 9   |
| SMMPA12708 | 22 | 19 | 16 | 25  | 19  | 21  | 11 | 17  | 16  |
| SMMPA12709 | 10 | 7  | 6  | 21  | 14  | 10  | 9  | 15  | 12  |
| SMMPA12710 | 18 | 12 | 17 | 10  | 9   | 23  | 17 | 24  | 23  |
| SMMPA12711 | 8  | 3  | 11 | 65  | 65  | 59  | 16 | 23  | 9   |
| SMMPA12712 | 14 | 11 | 7  | 80  | 53  | 57  | 31 | 50  | 44  |
| SMMPA12713 | 16 | 14 | 15 | 13  | 25  | 19  | 21 | 18  | 32  |

|            |    |    |    |     |     |     |     |     |     |
|------------|----|----|----|-----|-----|-----|-----|-----|-----|
| SMMPA12714 | 39 | 48 | 40 | 110 | 99  | 80  | 54  | 64  | 65  |
| SMMPA12715 | 17 | 19 | 16 | 24  | 29  | 26  | 14  | 15  | 30  |
| SMMPA12716 | 26 | 22 | 17 | 47  | 28  | 32  | 30  | 30  | 18  |
| SMMPA12717 | 7  | 11 | 9  | 41  | 28  | 19  | 15  | 19  | 12  |
| SMMPA12718 | 85 | 93 | 78 | 48  | 65  | 59  | 56  | 71  | 86  |
| SMMPA12719 | 62 | 78 | 72 | 20  | 31  | 44  | 42  | 63  | 69  |
| SMMPA12720 | 12 | 6  | 7  | 31  | 21  | 18  | 12  | 19  | 16  |
| SMMPA12721 | 21 | 14 | 14 | 38  | 23  | 35  | 25  | 27  | 16  |
| SMMPA12722 | 6  | 14 | 8  | 5   | 7   | 7   | 9   | 13  | 11  |
| SMMPA12723 | 11 | 19 | 12 | 44  | 43  | 36  | 27  | 25  | 26  |
| SMMPA12724 | 28 | 37 | 29 | 82  | 81  | 73  | 50  | 56  | 47  |
| SMMPA12725 | 24 | 22 | 12 | 39  | 40  | 44  | 28  | 37  | 32  |
| SMMPA12726 | 23 | 21 | 20 | 82  | 44  | 60  | 20  | 31  | 28  |
| SMMPA12727 | 16 | 27 | 23 | 122 | 119 | 88  | 34  | 51  | 56  |
| SMMPA12728 | 31 | 25 | 37 | 64  | 52  | 63  | 44  | 45  | 56  |
| SMMPA12729 | 18 | 17 | 29 | 32  | 31  | 17  | 12  | 14  | 22  |
| SMMPA12730 | 3  | 6  | 1  | 4   | 3   | 6   | 1   | 5   | 6   |
| SMMPA12731 | 18 | 22 | 11 | 83  | 110 | 73  | 55  | 64  | 53  |
| SMMPA12732 | 32 | 20 | 27 | 114 | 84  | 84  | 51  | 78  | 68  |
| SMMPA12733 | 5  | 17 | 14 | 29  | 35  | 32  | 32  | 28  | 40  |
| SMMPA12734 | 23 | 26 | 23 | 36  | 34  | 29  | 28  | 35  | 32  |
| SMMPA12735 | 27 | 28 | 27 | 28  | 32  | 18  | 34  | 27  | 40  |
| SMMPA12736 | 32 | 35 | 22 | 53  | 41  | 30  | 32  | 58  | 33  |
| SMMPA12737 | 35 | 42 | 35 | 20  | 34  | 30  | 40  | 65  | 56  |
| SMMPA12738 | 20 | 17 | 18 | 133 | 120 | 97  | 57  | 86  | 70  |
| SMMPA12739 | 39 | 35 | 45 | 296 | 269 | 206 | 176 | 215 | 168 |
| SMMPA12740 | 29 | 26 | 20 | 404 | 370 | 334 | 151 | 231 | 159 |
| SMMPA12741 | 16 | 11 | 12 | 340 | 321 | 307 | 170 | 232 | 182 |
| SMMPA12742 | 54 | 53 | 57 | 172 | 169 | 145 | 113 | 131 | 120 |
| SMMPA12743 | 21 | 12 | 20 | 31  | 38  | 26  | 30  | 38  | 31  |
| SMMPA12744 | 15 | 11 | 16 | 62  | 61  | 43  | 39  | 36  | 46  |
| SMMPA12745 | 23 | 31 | 10 | 64  | 57  | 61  | 43  | 63  | 51  |
| SMMPA12746 | 18 | 11 | 11 | 34  | 22  | 25  | 31  | 39  | 37  |
| SMMPA12747 | 6  | 8  | 11 | 8   | 14  | 13  | 27  | 15  | 27  |
| SMMPA12748 | 8  | 12 | 20 | 25  | 19  | 17  | 26  | 27  | 27  |
| SMMPA12749 | 24 | 16 | 17 | 30  | 31  | 17  | 23  | 40  | 25  |
| SMMPA12750 | 19 | 12 | 18 | 14  | 22  | 11  | 21  | 33  | 22  |
| SMMPA12751 | 26 | 25 | 27 | 43  | 46  | 25  | 35  | 35  | 31  |
| SMMPA12752 | 18 | 10 | 11 | 15  | 14  | 11  | 17  | 20  | 13  |
| SMMPA12753 | 36 | 35 | 31 | 47  | 57  | 57  | 39  | 61  | 68  |
| SMMPA12754 | 50 | 48 | 40 | 142 | 138 | 109 | 89  | 127 | 128 |



|            |    |    |    |     |     |     |     |     |     |
|------------|----|----|----|-----|-----|-----|-----|-----|-----|
| SMMPA12755 | 49 | 48 | 46 | 56  | 47  | 40  | 62  | 81  | 74  |
| SMMPA12756 | 24 | 26 | 22 | 41  | 42  | 37  | 29  | 49  | 50  |
| SMMPA12757 | 24 | 41 | 32 | 91  | 88  | 54  | 56  | 66  | 63  |
| SMMPA12758 | 11 | 11 | 24 | 30  | 15  | 19  | 29  | 32  | 33  |
| SMMPA12759 | 18 | 19 | 17 | 21  | 29  | 20  | 18  | 25  | 27  |
| SMMPA12760 | 43 | 50 | 43 | 87  | 87  | 71  | 44  | 84  | 67  |
| SMMPA12761 | 25 | 33 | 28 | 66  | 62  | 47  | 45  | 48  | 43  |
| SMMPA12762 | 31 | 30 | 36 | 63  | 57  | 48  | 35  | 53  | 45  |
| SMMPA12763 | 69 | 78 | 65 | 92  | 68  | 63  | 104 | 111 | 122 |
| SMMPA12764 | 22 | 14 | 24 | 39  | 33  | 36  | 23  | 49  | 43  |
| SMMPA12765 | 30 | 19 | 19 | 92  | 107 | 89  | 60  | 84  | 68  |
| SMMPA12766 | 19 | 30 | 19 | 198 | 161 | 124 | 87  | 111 | 109 |
| SMMPA12767 | 9  | 7  | 8  | 144 | 131 | 75  | 81  | 117 | 75  |
| SMMPA12768 | 20 | 16 | 14 | 61  | 63  | 47  | 51  | 80  | 52  |
| SMMPA12769 | 6  | 4  | 9  | 30  | 16  | 11  | 33  | 37  | 21  |
| SMMPA12770 | 10 | 19 | 11 | 103 | 111 | 72  | 57  | 93  | 79  |
| SMMPA12771 | 9  | 12 | 18 | 46  | 44  | 29  | 33  | 59  | 41  |
| SMMPA12772 | 14 | 8  | 18 | 45  | 28  | 32  | 33  | 49  | 24  |
| SMMPA12773 | 23 | 20 | 18 | 55  | 53  | 57  | 57  | 67  | 72  |
| SMMPA12774 | 12 | 24 | 14 | 77  | 79  | 65  | 58  | 79  | 59  |
| SMMPA12775 | 7  | 3  | 4  | 117 | 78  | 59  | 88  | 91  | 75  |
| SMMPA12776 | 20 | 16 | 19 | 34  | 27  | 17  | 14  | 39  | 35  |
| SMMPA12777 | 24 | 23 | 15 | 15  | 13  | 14  | 12  | 27  | 20  |
| SMMPA12778 | 10 | 23 | 8  | 8   | 14  | 15  | 23  | 19  | 28  |
| SMMPA12779 | 11 | 13 | 13 | 59  | 31  | 38  | 36  | 35  | 28  |
| SMMPA12780 | 17 | 20 | 8  | 39  | 27  | 21  | 18  | 17  | 21  |
| SMMPA12781 | 13 | 20 | 18 | 18  | 17  | 17  | 21  | 29  | 38  |
| SMMPA12782 | 24 | 29 | 26 | 24  | 27  | 23  | 23  | 35  | 30  |
| SMMPA12783 | 12 | 23 | 20 | 37  | 24  | 21  | 27  | 31  | 34  |
| SMMPA12784 | 7  | 9  | 13 | 19  | 6   | 12  | 23  | 20  | 19  |
| SMMPA12785 | 11 | 13 | 15 | 21  | 25  | 23  | 25  | 27  | 33  |
| SMMPA12786 | 22 | 30 | 18 | 35  | 27  | 39  | 31  | 32  | 29  |
| SMMPA12787 | 22 | 29 | 19 | 10  | 12  | 17  | 14  | 24  | 21  |
| SMMPA12788 | 18 | 16 | 27 | 44  | 33  | 36  | 29  | 39  | 40  |
| SMMPA12789 | 33 | 31 | 26 | 46  | 38  | 35  | 29  | 42  | 27  |
| SMMPA12790 | 22 | 18 | 15 | 38  | 21  | 28  | 22  | 33  | 27  |
| SMMPA12791 | 46 | 43 | 30 | 55  | 57  | 50  | 38  | 55  | 45  |
| SMMPA12792 | 28 | 24 | 22 | 41  | 36  | 27  | 34  | 39  | 30  |
| SMMPA12793 | 34 | 36 | 35 | 58  | 65  | 52  | 33  | 63  | 40  |
| SMMPA12794 | 12 | 10 | 10 | 22  | 29  | 31  | 12  | 11  | 11  |
| SMMPA12795 | 19 | 18 | 13 | 42  | 37  | 38  | 13  | 26  | 19  |

|            |    |    |    |      |      |      |     |     |     |
|------------|----|----|----|------|------|------|-----|-----|-----|
| SMMPA12796 | 16 | 21 | 16 | 37   | 36   | 41   | 31  | 24  | 33  |
| SMMPA12797 | 20 | 19 | 20 | 51   | 43   | 25   | 30  | 38  | 39  |
| SMMPA12798 | 22 | 38 | 23 | 43   | 41   | 46   | 21  | 36  | 34  |
| SMMPA12799 | 19 | 23 | 22 | 26   | 31   | 24   | 47  | 67  | 62  |
| SMMPA12800 | 27 | 23 | 20 | 39   | 41   | 29   | 21  | 47  | 34  |
| SMMPA12801 | 21 | 16 | 16 | 13   | 18   | 16   | 16  | 17  | 34  |
| SMMPA12802 | 25 | 31 | 22 | 36   | 38   | 32   | 30  | 37  | 32  |
| SMMPA12803 | 7  | 10 | 6  | 10   | 11   | 10   | 9   | 16  | 13  |
| SMMPA12804 | 21 | 24 | 22 | 30   | 15   | 15   | 33  | 37  | 35  |
| SMMPA12805 | 12 | 18 | 18 | 22   | 19   | 22   | 26  | 30  | 32  |
| SMMPA12806 | 31 | 41 | 44 | 87   | 70   | 63   | 54  | 67  | 64  |
| SMMPA12807 | 28 | 30 | 31 | 126  | 137  | 85   | 75  | 84  | 70  |
| SMMPA12808 | 12 | 13 | 17 | 81   | 88   | 74   | 40  | 51  | 37  |
| SMMPA12809 | 16 | 9  | 9  | 26   | 17   | 13   | 20  | 21  | 21  |
| SMMPA12810 | 15 | 12 | 10 | 50   | 57   | 47   | 31  | 39  | 32  |
| SMMPA12811 | 8  | 19 | 11 | 26   | 18   | 29   | 21  | 17  | 18  |
| SMMPA12812 | 9  | 9  | 7  | 8    | 18   | 4    | 8   | 20  | 7   |
| SMMPA12813 | 13 | 18 | 17 | 148  | 131  | 91   | 39  | 44  | 37  |
| SMMPA12814 | 10 | 11 | 7  | 8    | 9    | 6    | 10  | 18  | 18  |
| SMMPA12815 | 4  | 12 | 3  | 9    | 13   | 11   | 11  | 6   | 11  |
| SMMPA12816 | 14 | 15 | 16 | 158  | 98   | 114  | 54  | 82  | 57  |
| SMMPA12817 | 14 | 18 | 18 | 250  | 217  | 167  | 91  | 128 | 102 |
| SMMPA12818 | 5  | 5  | 2  | 40   | 36   | 35   | 14  | 13  | 9   |
| SMMPA12819 | 6  | 7  | 7  | 54   | 52   | 46   | 13  | 19  | 28  |
| SMMPA12820 | 36 | 54 | 51 | 1192 | 1230 | 1006 | 362 | 456 | 379 |
| SMMPA12821 | 29 | 34 | 38 | 309  | 327  | 277  | 120 | 163 | 142 |
| SMMPA12822 | 45 | 35 | 30 | 617  | 601  | 534  | 194 | 294 | 193 |
| SMMPA12823 | 17 | 18 | 12 | 293  | 237  | 241  | 117 | 133 | 107 |
| SMMPA12824 | 18 | 12 | 7  | 40   | 47   | 37   | 18  | 29  | 16  |
| SMMPA12825 | 17 | 15 | 15 | 306  | 326  | 276  | 143 | 175 | 156 |
| SMMPA12826 | 20 | 26 | 24 | 325  | 292  | 210  | 155 | 176 | 176 |
| SMMPA12827 | 18 | 18 | 11 | 66   | 58   | 52   | 37  | 51  | 38  |
| SMMPA12828 | 35 | 23 | 31 | 126  | 96   | 70   | 71  | 87  | 76  |
| SMMPA12829 | 14 | 15 | 11 | 46   | 41   | 44   | 28  | 40  | 39  |
| SMMPA12830 | 21 | 28 | 23 | 100  | 93   | 73   | 77  | 86  | 73  |
| SMMPA12831 | 15 | 15 | 14 | 34   | 38   | 36   | 25  | 34  | 40  |
| SMMPA12832 | 24 | 25 | 24 | 79   | 121  | 78   | 35  | 41  | 54  |
| SMMPA12833 | 17 | 34 | 16 | 31   | 52   | 29   | 25  | 32  | 28  |
| SMMPA12834 | 13 | 13 | 18 | 30   | 36   | 22   | 11  | 20  | 17  |
| SMMPA12835 | 28 | 36 | 19 | 243  | 209  | 140  | 94  | 104 | 115 |
| SMMPA12836 | 13 | 9  | 4  | 84   | 83   | 49   | 40  | 49  | 34  |

|            |    |    |    |     |     |     |     |     |     |
|------------|----|----|----|-----|-----|-----|-----|-----|-----|
| SMMPA12837 | 45 | 25 | 35 | 168 | 150 | 111 | 62  | 65  | 65  |
| SMMPA12838 | 38 | 32 | 31 | 326 | 300 | 226 | 95  | 126 | 133 |
| SMMPA12839 | 4  | 3  | 1  | 10  | 15  | 10  | 3   | 15  | 21  |
| SMMPA12840 | 24 | 27 | 28 | 236 | 236 | 167 | 82  | 103 | 98  |
| SMMPA12841 | 57 | 66 | 52 | 172 | 167 | 138 | 90  | 113 | 104 |
| SMMPA12842 | 39 | 31 | 19 | 116 | 95  | 95  | 49  | 58  | 62  |
| SMMPA12843 | 21 | 10 | 16 | 164 | 180 | 126 | 58  | 99  | 69  |
| SMMPA12844 | 8  | 15 | 7  | 32  | 24  | 30  | 21  | 24  | 27  |
| SMMPA12845 | 48 | 43 | 36 | 120 | 147 | 108 | 98  | 119 | 107 |
| SMMPA12846 | 32 | 30 | 26 | 118 | 136 | 86  | 46  | 51  | 57  |
| SMMPA12847 | 42 | 39 | 22 | 83  | 74  | 67  | 41  | 55  | 69  |
| SMMPA12848 | 24 | 36 | 27 | 90  | 70  | 67  | 77  | 99  | 89  |
| SMMPA12849 | 13 | 23 | 22 | 48  | 30  | 24  | 30  | 38  | 39  |
| SMMPA12850 | 17 | 29 | 19 | 31  | 43  | 34  | 22  | 38  | 37  |
| SMMPA12851 | 6  | 17 | 14 | 224 | 244 | 161 | 127 | 163 | 150 |
| SMMPA12852 | 18 | 13 | 18 | 15  | 7   | 9   | 17  | 30  | 22  |
| SMMPA12853 | 17 | 21 | 24 | 102 | 69  | 66  | 54  | 53  | 77  |
| SMMPA12854 | 29 | 29 | 26 | 275 | 287 | 205 | 144 | 201 | 156 |
| SMMPA12855 | 32 | 25 | 20 | 211 | 217 | 147 | 64  | 84  | 61  |
| SMMPA12856 | 40 | 46 | 50 | 128 | 138 | 101 | 52  | 89  | 77  |
| SMMPA12857 | 21 | 38 | 29 | 966 | 949 | 771 | 401 | 534 | 500 |
| SMMPA12858 | 23 | 31 | 26 | 86  | 88  | 63  | 54  | 54  | 48  |
| SMMPA12859 | 36 | 30 | 34 | 693 | 697 | 579 | 301 | 396 | 337 |
| SMMPA12860 | 9  | 19 | 16 | 38  | 62  | 31  | 22  | 17  | 21  |
| SMMPA12861 | 24 | 36 | 23 | 155 | 166 | 120 | 51  | 99  | 84  |
| SMMPA12862 | 26 | 37 | 32 | 88  | 103 | 65  | 40  | 55  | 45  |
| SMMPA12863 | 26 | 30 | 33 | 118 | 114 | 86  | 32  | 71  | 50  |
| SMMPA12864 | 24 | 22 | 17 | 239 | 221 | 156 | 89  | 128 | 105 |
| SMMPA12865 | 18 | 11 | 11 | 34  | 27  | 32  | 28  | 32  | 29  |
| SMMPA12866 | 19 | 24 | 15 | 103 | 105 | 77  | 47  | 72  | 68  |
| SMMPA12867 | 21 | 12 | 10 | 17  | 19  | 24  | 18  | 34  | 26  |
| SMMPA12868 | 11 | 18 | 19 | 59  | 61  | 39  | 35  | 37  | 34  |
| SMMPA12869 | 11 | 22 | 19 | 45  | 37  | 17  | 17  | 35  | 31  |
| SMMPA12870 | 18 | 13 | 18 | 21  | 20  | 21  | 19  | 31  | 27  |
| SMMPA12871 | 58 | 68 | 51 | 277 | 264 | 242 | 158 | 198 | 210 |
| SMMPA12872 | 15 | 22 | 21 | 206 | 219 | 179 | 90  | 141 | 119 |
| SMMPA12873 | 7  | 13 | 6  | 134 | 95  | 97  | 88  | 126 | 97  |
| SMMPA12874 | 15 | 14 | 22 | 503 | 447 | 412 | 340 | 465 | 379 |
| SMMPA12875 | 34 | 35 | 42 | 460 | 439 | 369 | 212 | 312 | 245 |
| SMMPA12876 | 37 | 30 | 30 | 384 | 327 | 262 | 202 | 261 | 219 |
| SMMPA12877 | 33 | 34 | 24 | 559 | 544 | 388 | 217 | 290 | 222 |

|            |    |    |    |     |     |     |     |     |     |
|------------|----|----|----|-----|-----|-----|-----|-----|-----|
| SMMPA12878 | 32 | 39 | 21 | 674 | 643 | 503 | 338 | 499 | 440 |
| SMMPA12879 | 6  | 6  | 4  | 12  | 4   | 7   | 6   | 8   | 10  |
| SMMPA12880 | 16 | 19 | 19 | 184 | 181 | 149 | 50  | 57  | 50  |
| SMMPA12881 | 7  | 7  | 3  | 10  | 9   | 14  | 8   | 8   | 9   |
| SMMPA12882 | 22 | 23 | 21 | 24  | 22  | 26  | 20  | 29  | 24  |
| SMMPA12883 | 2  | 1  | 2  | 1   | 2   | 0   | 1   | 7   | 0   |
| SMMPA12884 | 18 | 15 | 22 | 29  | 25  | 24  | 37  | 31  | 30  |
| SMMPA12885 | 18 | 16 | 15 | 18  | 17  | 22  | 16  | 25  | 19  |
| SMMPA12886 | 30 | 37 | 34 | 70  | 77  | 78  | 42  | 64  | 52  |
| SMMPA12887 | 5  | 5  | 6  | 9   | 6   | 3   | 6   | 10  | 4   |
| SMMPA12888 | 24 | 18 | 19 | 44  | 30  | 28  | 18  | 36  | 38  |
| SMMPA12889 | 20 | 41 | 25 | 270 | 213 | 189 | 129 | 185 | 140 |
| SMMPA12890 | 20 | 30 | 25 | 111 | 88  | 90  | 37  | 58  | 46  |
| SMMPA12891 | 10 | 9  | 9  | 54  | 54  | 56  | 30  | 36  | 27  |
| SMMPA12892 | 24 | 14 | 18 | 148 | 134 | 92  | 44  | 84  | 79  |
| SMMPA12893 | 15 | 13 | 19 | 54  | 39  | 43  | 22  | 51  | 30  |
| SMMPA12894 | 22 | 27 | 22 | 343 | 289 | 243 | 165 | 218 | 187 |
| SMMPA12895 | 4  | 3  | 1  | 5   | 11  | 10  | 6   | 9   | 5   |
| SMMPA12896 | 3  | 8  | 1  | 9   | 9   | 5   | 3   | 3   | 3   |
| SMMPA12897 | 10 | 11 | 11 | 22  | 28  | 29  | 11  | 23  | 18  |
| SMMPA12898 | 5  | 5  | 4  | 13  | 14  | 14  | 12  | 15  | 4   |
| SMMPA12899 | 7  | 8  | 2  | 8   | 6   | 4   | 3   | 2   | 2   |
| SMMPA12900 | 22 | 34 | 26 | 55  | 49  | 40  | 30  | 42  | 45  |
| SMMPA12901 | 38 | 46 | 42 | 288 | 252 | 213 | 116 | 167 | 155 |
| SMMPA12902 | 26 | 31 | 24 | 100 | 65  | 73  | 38  | 52  | 57  |
| SMMPA12903 | 44 | 53 | 33 | 103 | 92  | 78  | 53  | 67  | 76  |
| SMMPA12904 | 30 | 38 | 20 | 107 | 105 | 73  | 66  | 96  | 89  |
| SMMPA12905 | 30 | 21 | 25 | 29  | 30  | 23  | 30  | 30  | 50  |
| SMMPA12906 | 39 | 58 | 61 | 32  | 45  | 35  | 34  | 49  | 54  |
| SMMPA12907 | 16 | 16 | 14 | 32  | 25  | 30  | 28  | 27  | 19  |
| SMMPA12908 | 6  | 2  | 4  | 9   | 6   | 11  | 8   | 6   | 5   |
| SMMPA12909 | 8  | 17 | 14 | 27  | 20  | 15  | 21  | 22  | 24  |
| SMMPA12910 | 15 | 17 | 17 | 19  | 16  | 14  | 15  | 31  | 27  |
| SMMPA12911 | 8  | 7  | 15 | 51  | 38  | 37  | 22  | 26  | 31  |
| SMMPA12912 | 9  | 9  | 10 | 9   | 4   | 3   | 14  | 12  | 16  |
| SMMPA12913 | 22 | 21 | 22 | 38  | 24  | 19  | 24  | 28  | 19  |
| SMMPA12914 | 6  | 4  | 7  | 6   | 6   | 5   | 7   | 10  | 6   |
| SMMPA12915 | 13 | 24 | 11 | 47  | 43  | 32  | 17  | 28  | 32  |
| SMMPA12916 | 7  | 3  | 3  | 18  | 15  | 14  | 3   | 22  | 14  |
| SMMPA12917 | 30 | 23 | 20 | 64  | 39  | 42  | 24  | 39  | 28  |
| SMMPA12918 | 15 | 24 | 22 | 26  | 18  | 21  | 39  | 40  | 51  |

|            |    |    |    |     |     |     |    |    |    |
|------------|----|----|----|-----|-----|-----|----|----|----|
| SMMPA12919 | 10 | 18 | 6  | 9   | 3   | 5   | 7  | 15 | 8  |
| SMMPA12920 | 16 | 12 | 8  | 24  | 12  | 23  | 23 | 25 | 15 |
| SMMPA12921 | 37 | 16 | 34 | 64  | 43  | 38  | 48 | 63 | 59 |
| SMMPA12922 | 5  | 7  | 4  | 19  | 18  | 17  | 10 | 16 | 13 |
| SMMPA12923 | 28 | 15 | 15 | 114 | 117 | 86  | 40 | 75 | 56 |
| SMMPA12924 | 5  | 6  | 6  | 14  | 15  | 11  | 7  | 16 | 20 |
| SMMPA12925 | 2  | 6  | 3  | 35  | 21  | 17  | 20 | 22 | 18 |
| SMMPA12926 | 15 | 14 | 7  | 40  | 39  | 37  | 22 | 23 | 33 |
| SMMPA12927 | 20 | 32 | 15 | 82  | 71  | 71  | 42 | 49 | 51 |
| SMMPA12928 | 10 | 3  | 4  | 28  | 23  | 21  | 13 | 32 | 33 |
| SMMPA12929 | 23 | 17 | 14 | 28  | 29  | 23  | 28 | 45 | 50 |
| SMMPA12930 | 21 | 19 | 23 | 22  | 15  | 14  | 24 | 43 | 37 |
| SMMPA12931 | 33 | 27 | 26 | 23  | 28  | 16  | 37 | 31 | 41 |
| SMMPA12932 | 10 | 15 | 12 | 18  | 25  | 12  | 11 | 27 | 39 |
| SMMPA12933 | 12 | 16 | 17 | 20  | 19  | 8   | 15 | 18 | 18 |
| SMMPA12934 | 13 | 22 | 14 | 18  | 19  | 20  | 23 | 38 | 34 |
| SMMPA12935 | 21 | 33 | 25 | 28  | 18  | 16  | 40 | 38 | 33 |
| SMMPA12936 | 16 | 18 | 10 | 25  | 20  | 18  | 11 | 25 | 28 |
| SMMPA12937 | 9  | 17 | 29 | 21  | 38  | 19  | 12 | 27 | 26 |
| SMMPA12938 | 15 | 20 | 19 | 13  | 19  | 12  | 18 | 22 | 27 |
| SMMPA12939 | 17 | 18 | 16 | 65  | 61  | 35  | 43 | 54 | 44 |
| SMMPA12940 | 24 | 24 | 29 | 81  | 69  | 51  | 32 | 56 | 48 |
| SMMPA12941 | 16 | 14 | 11 | 34  | 31  | 28  | 19 | 35 | 35 |
| SMMPA12942 | 22 | 29 | 18 | 100 | 84  | 61  | 50 | 69 | 67 |
| SMMPA12943 | 28 | 28 | 27 | 151 | 167 | 119 | 76 | 76 | 81 |
| SMMPA12944 | 30 | 24 | 18 | 37  | 36  | 38  | 42 | 47 | 40 |
| SMMPA12945 | 19 | 19 | 14 | 45  | 43  | 32  | 24 | 43 | 29 |
| SMMPA12946 | 25 | 21 | 20 | 39  | 31  | 31  | 35 | 33 | 34 |
| SMMPA12947 | 41 | 38 | 34 | 71  | 61  | 56  | 49 | 86 | 70 |
| SMMPA12948 | 17 | 18 | 22 | 29  | 35  | 23  | 26 | 52 | 47 |
| SMMPA12949 | 16 | 8  | 16 | 27  | 24  | 18  | 22 | 14 | 25 |
| SMMPA12950 | 11 | 14 | 7  | 9   | 21  | 20  | 13 | 17 | 12 |
| SMMPA12951 | 11 | 17 | 14 | 21  | 26  | 24  | 18 | 16 | 22 |
| SMMPA12952 | 4  | 11 | 4  | 8   | 13  | 11  | 10 | 10 | 9  |
| SMMPA12953 | 16 | 17 | 16 | 26  | 21  | 15  | 18 | 30 | 21 |
| SMMPA12954 | 18 | 17 | 16 | 32  | 23  | 30  | 23 | 27 | 20 |
| SMMPA12955 | 32 | 37 | 36 | 142 | 137 | 98  | 64 | 74 | 74 |
| SMMPA12956 | 37 | 39 | 37 | 76  | 50  | 53  | 50 | 72 | 74 |
| SMMPA12957 | 19 | 19 | 25 | 49  | 40  | 38  | 29 | 37 | 34 |
| SMMPA12958 | 11 | 19 | 17 | 19  | 9   | 12  | 13 | 17 | 26 |
| SMMPA12959 | 7  | 3  | 2  | 3   | 6   | 4   | 6  | 9  | 6  |

|            |    |    |    |     |     |     |     |     |     |
|------------|----|----|----|-----|-----|-----|-----|-----|-----|
| SMMPA12960 | 39 | 31 | 30 | 49  | 53  | 56  | 42  | 57  | 53  |
| SMMPA12961 | 24 | 35 | 28 | 633 | 609 | 526 | 384 | 537 | 458 |
| SMMPA12962 | 24 | 21 | 16 | 466 | 497 | 457 | 225 | 281 | 252 |
| SMMPA12963 | 22 | 13 | 21 | 202 | 158 | 117 | 214 | 275 | 181 |
| SMMPA12964 | 22 | 16 | 20 | 490 | 464 | 379 | 285 | 363 | 284 |
| SMMPA12965 | 14 | 22 | 16 | 33  | 41  | 28  | 29  | 51  | 42  |
| SMMPA12966 | 11 | 17 | 18 | 18  | 21  | 24  | 13  | 19  | 14  |
| SMMPA12967 | 11 | 16 | 9  | 22  | 38  | 23  | 15  | 27  | 23  |
| SMMPA12968 | 24 | 13 | 15 | 29  | 30  | 32  | 16  | 32  | 29  |
| SMMPA12969 | 23 | 19 | 23 | 74  | 56  | 64  | 31  | 58  | 44  |
| SMMPA12970 | 13 | 10 | 9  | 22  | 25  | 22  | 21  | 25  | 22  |
| SMMPA12971 | 24 | 24 | 25 | 110 | 113 | 87  | 59  | 68  | 56  |
| SMMPA12972 | 12 | 18 | 20 | 18  | 17  | 26  | 13  | 18  | 20  |
| SMMPA12973 | 2  | 2  | 2  | 12  | 11  | 11  | 14  | 12  | 8   |
| SMMPA12974 | 17 | 12 | 12 | 31  | 32  | 30  | 26  | 24  | 26  |
| SMMPA12975 | 25 | 17 | 20 | 73  | 75  | 50  | 31  | 37  | 30  |
| SMMPA12976 | 13 | 18 | 21 | 25  | 30  | 16  | 26  | 28  | 27  |
| SMMPA12977 | 20 | 22 | 24 | 151 | 130 | 125 | 60  | 59  | 58  |
| SMMPA12978 | 13 | 18 | 8  | 387 | 334 | 294 | 130 | 128 | 109 |
| SMMPA12979 | 13 | 13 | 10 | 34  | 36  | 36  | 22  | 24  | 33  |
| SMMPA12980 | 11 | 21 | 10 | 44  | 33  | 33  | 32  | 26  | 22  |
| SMMPA12981 | 14 | 16 | 9  | 207 | 238 | 175 | 52  | 73  | 60  |
| SMMPA12982 | 12 | 10 | 12 | 42  | 47  | 34  | 21  | 19  | 28  |
| SMMPA12983 | 34 | 40 | 28 | 552 | 523 | 428 | 202 | 260 | 222 |
| SMMPA12984 | 20 | 13 | 16 | 67  | 55  | 51  | 18  | 44  | 32  |
| SMMPA12985 | 14 | 18 | 12 | 16  | 17  | 14  | 22  | 32  | 30  |
| SMMPA12986 | 9  | 14 | 8  | 14  | 13  | 17  | 23  | 24  | 31  |
| SMMPA12987 | 3  | 7  | 2  | 3   | 5   | 0   | 5   | 6   | 8   |
| SMMPA12988 | 23 | 22 | 19 | 37  | 23  | 27  | 32  | 56  | 45  |
| SMMPA12989 | 24 | 27 | 25 | 141 | 134 | 104 | 56  | 82  | 76  |
| SMMPA12990 | 26 | 28 | 18 | 88  | 87  | 53  | 65  | 66  | 67  |
| SMMPA12991 | 17 | 21 | 15 | 54  | 52  | 29  | 32  | 49  | 38  |
| SMMPA12992 | 9  | 9  | 3  | 38  | 41  | 42  | 9   | 19  | 9   |
| SMMPA12993 | 16 | 23 | 19 | 37  | 26  | 35  | 34  | 31  | 33  |
| SMMPA12994 | 32 | 36 | 23 | 65  | 52  | 50  | 57  | 72  | 88  |
| SMMPA12995 | 21 | 36 | 14 | 46  | 45  | 48  | 41  | 49  | 49  |
| SMMPA12996 | 32 | 30 | 22 | 63  | 39  | 45  | 42  | 52  | 40  |
| SMMPA12997 | 35 | 47 | 35 | 230 | 223 | 172 | 115 | 129 | 114 |
| SMMPA12998 | 22 | 30 | 21 | 26  | 33  | 28  | 40  | 48  | 55  |
| SMMPA12999 | 15 | 17 | 13 | 45  | 65  | 44  | 43  | 46  | 43  |
| SMMPA13000 | 22 | 18 | 14 | 52  | 49  | 49  | 28  | 40  | 39  |

|            |    |    |    |     |     |     |    |     |    |
|------------|----|----|----|-----|-----|-----|----|-----|----|
| SMMPA13001 | 36 | 36 | 38 | 39  | 41  | 44  | 47 | 67  | 58 |
| SMMPA13002 | 15 | 11 | 21 | 24  | 28  | 32  | 26 | 28  | 43 |
| SMMPA13003 | 23 | 21 | 16 | 31  | 32  | 27  | 16 | 40  | 26 |
| SMMPA13004 | 14 | 16 | 13 | 30  | 14  | 17  | 29 | 38  | 30 |
| SMMPA13005 | 17 | 29 | 15 | 31  | 17  | 27  | 34 | 37  | 37 |
| SMMPA13006 | 9  | 2  | 5  | 16  | 12  | 8   | 4  | 7   | 8  |
| SMMPA13007 | 6  | 5  | 7  | 16  | 9   | 17  | 7  | 16  | 14 |
| SMMPA13008 | 4  | 4  | 1  | 2   | 2   | 3   | 2  | 3   | 7  |
| SMMPA13009 | 12 | 5  | 2  | 20  | 15  | 14  | 4  | 9   | 13 |
| SMMPA13010 | 3  | 4  | 8  | 6   | 12  | 7   | 10 | 3   | 9  |
| SMMPA13011 | 13 | 10 | 14 | 15  | 13  | 16  | 17 | 19  | 18 |
| SMMPA13012 | 38 | 48 | 38 | 49  | 44  | 36  | 37 | 51  | 48 |
| SMMPA13013 | 10 | 23 | 8  | 14  | 13  | 14  | 12 | 23  | 22 |
| SMMPA13014 | 17 | 24 | 22 | 61  | 42  | 37  | 28 | 50  | 53 |
| SMMPA13015 | 19 | 18 | 18 | 32  | 33  | 25  | 24 | 26  | 27 |
| SMMPA13016 | 3  | 15 | 7  | 20  | 12  | 11  | 11 | 21  | 19 |
| SMMPA13017 | 12 | 18 | 6  | 12  | 19  | 15  | 20 | 17  | 18 |
| SMMPA13018 | 15 | 17 | 11 | 32  | 36  | 24  | 16 | 31  | 31 |
| SMMPA13019 | 33 | 22 | 16 | 25  | 25  | 32  | 31 | 26  | 32 |
| SMMPA13020 | 18 | 21 | 15 | 22  | 18  | 16  | 22 | 31  | 28 |
| SMMPA13021 | 15 | 15 | 12 | 18  | 14  | 12  | 14 | 29  | 21 |
| SMMPA13022 | 24 | 23 | 26 | 61  | 63  | 36  | 46 | 50  | 52 |
| SMMPA13023 | 16 | 11 | 19 | 31  | 23  | 17  | 18 | 35  | 15 |
| SMMPA13024 | 6  | 9  | 6  | 3   | 4   | 9   | 8  | 13  | 8  |
| SMMPA13025 | 17 | 23 | 18 | 11  | 10  | 13  | 15 | 21  | 13 |
| SMMPA13026 | 14 | 13 | 24 | 27  | 24  | 19  | 29 | 35  | 29 |
| SMMPA13027 | 22 | 20 | 21 | 43  | 32  | 44  | 41 | 49  | 53 |
| SMMPA13028 | 25 | 25 | 20 | 48  | 28  | 41  | 49 | 60  | 49 |
| SMMPA13029 | 16 | 18 | 20 | 91  | 73  | 72  | 32 | 45  | 49 |
| SMMPA13030 | 15 | 10 | 13 | 37  | 27  | 25  | 30 | 35  | 45 |
| SMMPA13031 | 7  | 11 | 10 | 25  | 25  | 16  | 14 | 30  | 17 |
| SMMPA13032 | 35 | 37 | 20 | 29  | 25  | 35  | 45 | 57  | 52 |
| SMMPA13033 | 31 | 52 | 27 | 122 | 133 | 105 | 78 | 104 | 94 |
| SMMPA13034 | 13 | 16 | 13 | 26  | 25  | 21  | 30 | 26  | 29 |
| SMMPA13035 | 12 | 9  | 10 | 48  | 37  | 32  | 17 | 27  | 21 |
| SMMPA13036 | 13 | 9  | 19 | 47  | 39  | 43  | 31 | 41  | 46 |
| SMMPA13037 | 19 | 19 | 12 | 185 | 166 | 116 | 95 | 118 | 97 |
| SMMPA13038 | 24 | 26 | 21 | 81  | 91  | 69  | 40 | 43  | 55 |
| SMMPA13039 | 20 | 18 | 13 | 151 | 157 | 113 | 61 | 74  | 67 |
| SMMPA13040 | 14 | 30 | 15 | 90  | 99  | 66  | 44 | 48  | 50 |
| SMMPA13041 | 19 | 22 | 11 | 28  | 39  | 15  | 17 | 29  | 24 |

|            |    |    |    |     |     |     |     |     |     |
|------------|----|----|----|-----|-----|-----|-----|-----|-----|
| SMMPA13042 | 22 | 26 | 29 | 32  | 19  | 24  | 26  | 37  | 19  |
| SMMPA13043 | 41 | 40 | 22 | 54  | 40  | 32  | 50  | 61  | 65  |
| SMMPA13044 | 17 | 14 | 6  | 12  | 14  | 15  | 12  | 23  | 24  |
| SMMPA13045 | 27 | 31 | 29 | 35  | 29  | 19  | 26  | 26  | 37  |
| SMMPA13046 | 11 | 22 | 22 | 35  | 49  | 37  | 26  | 37  | 48  |
| SMMPA13047 | 14 | 16 | 12 | 26  | 29  | 33  | 30  | 44  | 46  |
| SMMPA13048 | 9  | 9  | 7  | 8   | 4   | 4   | 17  | 12  | 16  |
| SMMPA13049 | 27 | 28 | 25 | 23  | 34  | 25  | 25  | 33  | 44  |
| SMMPA13050 | 19 | 17 | 11 | 28  | 19  | 18  | 21  | 28  | 18  |
| SMMPA13051 | 7  | 7  | 5  | 16  | 9   | 10  | 5   | 3   | 8   |
| SMMPA13052 | 19 | 25 | 17 | 36  | 36  | 41  | 31  | 36  | 39  |
| SMMPA13053 | 25 | 14 | 18 | 18  | 24  | 28  | 24  | 37  | 35  |
| SMMPA13054 | 16 | 19 | 9  | 16  | 10  | 6   | 17  | 19  | 26  |
| SMMPA13055 | 10 | 13 | 10 | 14  | 7   | 13  | 15  | 18  | 18  |
| SMMPA13056 | 18 | 26 | 23 | 75  | 55  | 53  | 55  | 58  | 69  |
| SMMPA13057 | 28 | 22 | 17 | 23  | 16  | 26  | 38  | 45  | 47  |
| SMMPA13058 | 26 | 27 | 24 | 32  | 30  | 23  | 26  | 40  | 34  |
| SMMPA13059 | 13 | 9  | 14 | 36  | 17  | 23  | 24  | 27  | 32  |
| SMMPA13060 | 25 | 19 | 31 | 45  | 31  | 41  | 41  | 45  | 46  |
| SMMPA13061 | 16 | 16 | 13 | 52  | 30  | 35  | 21  | 35  | 38  |
| SMMPA13062 | 14 | 12 | 7  | 72  | 73  | 47  | 42  | 46  | 35  |
| SMMPA13063 | 13 | 8  | 8  | 25  | 24  | 19  | 19  | 23  | 23  |
| SMMPA13064 | 32 | 25 | 29 | 195 | 170 | 171 | 107 | 123 | 117 |
| SMMPA13065 | 4  | 9  | 2  | 2   | 5   | 5   | 4   | 9   | 3   |
| SMMPA13066 | 4  | 3  | 3  | 34  | 33  | 28  | 12  | 14  | 13  |
| SMMPA13067 | 11 | 8  | 14 | 25  | 18  | 21  | 13  | 17  | 16  |
| SMMPA13068 | 3  | 12 | 10 | 29  | 29  | 19  | 12  | 24  | 15  |
| SMMPA13069 | 11 | 6  | 9  | 22  | 22  | 20  | 4   | 17  | 13  |
| SMMPA13070 | 16 | 11 | 9  | 48  | 47  | 30  | 19  | 51  | 38  |
| SMMPA13071 | 16 | 20 | 22 | 118 | 79  | 64  | 51  | 75  | 58  |
| SMMPA13072 | 22 | 22 | 14 | 110 | 97  | 73  | 62  | 75  | 87  |
| SMMPA13073 | 11 | 10 | 9  | 52  | 39  | 37  | 24  | 41  | 34  |
| SMMPA13074 | 11 | 13 | 13 | 39  | 23  | 24  | 27  | 33  | 37  |
| SMMPA13075 | 4  | 5  | 6  | 60  | 38  | 31  | 31  | 49  | 39  |
| SMMPA13076 | 16 | 19 | 16 | 42  | 32  | 38  | 29  | 39  | 33  |
| SMMPA13077 | 22 | 12 | 14 | 38  | 30  | 31  | 19  | 24  | 27  |
| SMMPA13078 | 26 | 24 | 21 | 23  | 22  | 21  | 32  | 32  | 33  |
| SMMPA13079 | 21 | 19 | 13 | 31  | 22  | 22  | 18  | 26  | 22  |
| SMMPA13080 | 26 | 36 | 29 | 22  | 14  | 23  | 18  | 18  | 16  |
| SMMPA13081 | 22 | 23 | 24 | 30  | 24  | 22  | 18  | 28  | 29  |
| SMMPA13082 | 22 | 23 | 21 | 40  | 28  | 28  | 24  | 32  | 36  |



|            |    |    |    |     |     |     |    |     |     |
|------------|----|----|----|-----|-----|-----|----|-----|-----|
| SMMPA13083 | 22 | 26 | 22 | 13  | 19  | 25  | 18 | 19  | 31  |
| SMMPA13084 | 23 | 36 | 20 | 68  | 61  | 49  | 50 | 69  | 58  |
| SMMPA13085 | 12 | 16 | 18 | 46  | 34  | 27  | 26 | 46  | 40  |
| SMMPA13086 | 17 | 25 | 17 | 32  | 22  | 26  | 44 | 50  | 39  |
| SMMPA13087 | 29 | 24 | 23 | 29  | 25  | 33  | 26 | 49  | 39  |
| SMMPA13088 | 24 | 19 | 23 | 15  | 14  | 18  | 23 | 35  | 27  |
| SMMPA13089 | 15 | 19 | 21 | 25  | 18  | 13  | 20 | 23  | 20  |
| SMMPA13090 | 29 | 33 | 18 | 24  | 26  | 26  | 34 | 35  | 41  |
| SMMPA13091 | 23 | 19 | 18 | 18  | 21  | 13  | 20 | 31  | 21  |
| SMMPA13092 | 18 | 18 | 17 | 39  | 24  | 25  | 37 | 43  | 39  |
| SMMPA13093 | 14 | 14 | 5  | 20  | 10  | 15  | 15 | 17  | 13  |
| SMMPA13094 | 7  | 6  | 13 | 32  | 29  | 25  | 32 | 34  | 39  |
| SMMPA13095 | 6  | 5  | 4  | 8   | 5   | 4   | 2  | 9   | 3   |
| SMMPA13096 | 8  | 12 | 17 | 31  | 36  | 31  | 26 | 34  | 27  |
| SMMPA13097 | 7  | 8  | 9  | 6   | 4   | 8   | 13 | 13  | 8   |
| SMMPA13098 | 7  | 4  | 4  | 2   | 9   | 4   | 6  | 9   | 9   |
| SMMPA13099 | 11 | 13 | 9  | 40  | 39  | 35  | 43 | 49  | 29  |
| SMMPA13100 | 16 | 18 | 16 | 40  | 31  | 25  | 21 | 33  | 24  |
| SMMPA13101 | 40 | 31 | 38 | 139 | 133 | 103 | 56 | 71  | 57  |
| SMMPA13102 | 15 | 11 | 11 | 25  | 18  | 22  | 17 | 18  | 12  |
| SMMPA13103 | 23 | 19 | 24 | 117 | 95  | 107 | 56 | 67  | 66  |
| SMMPA13104 | 15 | 21 | 15 | 117 | 100 | 81  | 78 | 91  | 73  |
| SMMPA13105 | 4  | 5  | 5  | 15  | 13  | 10  | 6  | 9   | 11  |
| SMMPA13106 | 37 | 28 | 22 | 257 | 244 | 174 | 84 | 146 | 104 |
| SMMPA13107 | 13 | 13 | 16 | 52  | 45  | 30  | 20 | 41  | 32  |
| SMMPA13108 | 35 | 43 | 40 | 276 | 284 | 215 | 81 | 115 | 105 |
| SMMPA13109 | 30 | 21 | 17 | 65  | 50  | 40  | 20 | 61  | 45  |
| SMMPA13110 | 26 | 32 | 22 | 107 | 106 | 80  | 43 | 57  | 47  |
| SMMPA13111 | 37 | 42 | 25 | 126 | 101 | 81  | 60 | 81  | 93  |
| SMMPA13112 | 73 | 55 | 48 | 88  | 99  | 86  | 71 | 88  | 104 |
| SMMPA13113 | 32 | 28 | 20 | 227 | 192 | 182 | 89 | 113 | 103 |
| SMMPA13114 | 19 | 18 | 16 | 47  | 43  | 47  | 37 | 50  | 42  |
| SMMPA13115 | 7  | 14 | 15 | 38  | 50  | 26  | 32 | 37  | 35  |
| SMMPA13116 | 21 | 22 | 24 | 177 | 144 | 139 | 55 | 107 | 96  |
| SMMPA13117 | 11 | 10 | 7  | 31  | 25  | 22  | 14 | 21  | 19  |
| SMMPA13118 | 18 | 31 | 19 | 36  | 31  | 36  | 26 | 34  | 48  |
| SMMPA13119 | 27 | 28 | 22 | 94  | 68  | 77  | 39 | 71  | 60  |
| SMMPA13120 | 15 | 16 | 18 | 36  | 19  | 21  | 24 | 39  | 27  |
| SMMPA13121 | 18 | 6  | 9  | 15  | 12  | 11  | 5  | 17  | 14  |
| SMMPA13122 | 47 | 42 | 39 | 142 | 123 | 123 | 84 | 103 | 100 |
| SMMPA13123 | 27 | 29 | 24 | 47  | 45  | 34  | 30 | 44  | 42  |

|            |    |    |    |     |     |     |    |     |     |
|------------|----|----|----|-----|-----|-----|----|-----|-----|
| SMMPA13124 | 23 | 24 | 19 | 55  | 44  | 33  | 43 | 67  | 51  |
| SMMPA13125 | 25 | 21 | 12 | 67  | 45  | 38  | 27 | 48  | 47  |
| SMMPA13126 | 21 | 30 | 22 | 57  | 45  | 38  | 39 | 53  | 32  |
| SMMPA13127 | 30 | 26 | 37 | 80  | 75  | 65  | 57 | 66  | 62  |
| SMMPA13128 | 11 | 6  | 12 | 20  | 10  | 8   | 10 | 12  | 16  |
| SMMPA13129 | 15 | 17 | 17 | 28  | 34  | 25  | 26 | 40  | 39  |
| SMMPA13130 | 16 | 11 | 9  | 42  | 34  | 32  | 9  | 27  | 14  |
| SMMPA13131 | 33 | 32 | 37 | 65  | 50  | 51  | 38 | 56  | 33  |
| SMMPA13132 | 33 | 25 | 20 | 60  | 36  | 31  | 27 | 41  | 36  |
| SMMPA13133 | 23 | 18 | 10 | 33  | 29  | 32  | 21 | 31  | 28  |
| SMMPA13134 | 22 | 30 | 23 | 91  | 89  | 66  | 43 | 64  | 60  |
| SMMPA13135 | 37 | 48 | 42 | 101 | 75  | 64  | 47 | 58  | 44  |
| SMMPA13136 | 36 | 53 | 42 | 71  | 66  | 53  | 58 | 60  | 84  |
| SMMPA13137 | 29 | 19 | 22 | 95  | 73  | 60  | 68 | 82  | 69  |
| SMMPA13138 | 15 | 15 | 13 | 17  | 17  | 15  | 26 | 29  | 28  |
| SMMPA13139 | 3  | 7  | 7  | 59  | 38  | 30  | 20 | 21  | 18  |
| SMMPA13140 | 24 | 34 | 29 | 47  | 53  | 56  | 32 | 33  | 42  |
| SMMPA13141 | 7  | 11 | 8  | 30  | 29  | 27  | 27 | 27  | 34  |
| SMMPA13142 | 21 | 16 | 30 | 64  | 49  | 67  | 65 | 57  | 73  |
| SMMPA13143 | 22 | 22 | 23 | 50  | 51  | 30  | 38 | 51  | 48  |
| SMMPA13144 | 9  | 16 | 21 | 27  | 31  | 26  | 35 | 47  | 42  |
| SMMPA13145 | 18 | 17 | 14 | 29  | 31  | 37  | 25 | 35  | 30  |
| SMMPA13146 | 46 | 38 | 31 | 194 | 143 | 124 | 90 | 133 | 117 |
| SMMPA13147 | 23 | 16 | 20 | 142 | 135 | 100 | 75 | 115 | 93  |
| SMMPA13148 | 12 | 22 | 13 | 41  | 34  | 35  | 23 | 34  | 34  |
| SMMPA13149 | 21 | 24 | 19 | 52  | 34  | 59  | 36 | 39  | 33  |
| SMMPA13150 | 16 | 7  | 18 | 18  | 20  | 11  | 20 | 27  | 26  |
| SMMPA13151 | 16 | 17 | 10 | 10  | 18  | 14  | 19 | 25  | 24  |
| SMMPA13152 | 18 | 12 | 22 | 22  | 17  | 14  | 11 | 20  | 25  |
| SMMPA13153 | 57 | 66 | 55 | 75  | 55  | 67  | 69 | 82  | 91  |
| SMMPA13154 | 20 | 17 | 19 | 24  | 30  | 15  | 21 | 33  | 14  |
| SMMPA13155 | 27 | 13 | 11 | 16  | 20  | 9   | 21 | 24  | 20  |
| SMMPA13156 | 20 | 24 | 15 | 19  | 4   | 20  | 23 | 27  | 15  |
| SMMPA13157 | 28 | 34 | 26 | 26  | 27  | 32  | 26 | 36  | 37  |
| SMMPA13158 | 34 | 23 | 19 | 21  | 20  | 18  | 23 | 31  | 30  |
| SMMPA13159 | 27 | 28 | 35 | 30  | 15  | 15  | 32 | 36  | 40  |
| SMMPA13160 | 31 | 31 | 22 | 30  | 28  | 21  | 28 | 22  | 29  |
| SMMPA13161 | 14 | 19 | 8  | 15  | 13  | 8   | 10 | 16  | 20  |
| SMMPA13162 | 12 | 12 | 17 | 13  | 12  | 10  | 25 | 23  | 23  |
| SMMPA13163 | 22 | 33 | 23 | 67  | 66  | 44  | 39 | 59  | 55  |
| SMMPA13164 | 16 | 26 | 23 | 35  | 34  | 27  | 32 | 45  | 48  |

|            |    |    |    |     |     |     |     |     |     |
|------------|----|----|----|-----|-----|-----|-----|-----|-----|
| SMMPA13165 | 29 | 20 | 17 | 13  | 11  | 12  | 17  | 24  | 26  |
| SMMPA13166 | 32 | 29 | 19 | 28  | 21  | 27  | 34  | 50  | 34  |
| SMMPA13167 | 16 | 22 | 21 | 11  | 11  | 23  | 19  | 21  | 32  |
| SMMPA13168 | 48 | 54 | 49 | 46  | 39  | 55  | 59  | 80  | 72  |
| SMMPA13169 | 42 | 34 | 39 | 50  | 43  | 30  | 30  | 63  | 57  |
| SMMPA13170 | 22 | 22 | 10 | 12  | 17  | 17  | 29  | 26  | 36  |
| SMMPA13171 | 38 | 37 | 27 | 430 | 380 | 297 | 177 | 237 | 220 |
| SMMPA13172 | 20 | 23 | 25 | 28  | 32  | 25  | 20  | 41  | 36  |
| SMMPA13173 | 10 | 12 | 22 | 31  | 30  | 40  | 26  | 30  | 35  |
| SMMPA13174 | 7  | 8  | 7  | 29  | 23  | 22  | 28  | 31  | 33  |
| SMMPA13175 | 30 | 31 | 21 | 199 | 156 | 123 | 80  | 126 | 89  |
| SMMPA13176 | 17 | 32 | 20 | 35  | 38  | 30  | 33  | 24  | 42  |
| SMMPA13177 | 37 | 36 | 32 | 182 | 162 | 142 | 89  | 114 | 119 |
| SMMPA13178 | 30 | 29 | 32 | 84  | 67  | 70  | 55  | 84  | 66  |
| SMMPA13179 | 18 | 17 | 20 | 40  | 26  | 29  | 27  | 30  | 42  |
| SMMPA13180 | 20 | 25 | 20 | 50  | 38  | 32  | 32  | 43  | 33  |
| SMMPA13181 | 22 | 19 | 23 | 27  | 11  | 14  | 24  | 26  | 29  |
| SMMPA13182 | 14 | 20 | 14 | 27  | 29  | 26  | 28  | 32  | 35  |
| SMMPA13183 | 26 | 14 | 10 | 26  | 18  | 27  | 20  | 29  | 36  |
| SMMPA13184 | 13 | 13 | 13 | 13  | 11  | 16  | 17  | 20  | 16  |
| SMMPA13185 | 6  | 17 | 21 | 32  | 40  | 36  | 25  | 23  | 30  |
| SMMPA13186 | 11 | 9  | 10 | 63  | 53  | 43  | 25  | 39  | 27  |
| SMMPA13187 | 22 | 25 | 23 | 54  | 41  | 40  | 31  | 39  | 35  |
| SMMPA13188 | 15 | 6  | 10 | 25  | 14  | 18  | 13  | 22  | 14  |
| SMMPA13189 | 10 | 4  | 5  | 23  | 22  | 13  | 11  | 13  | 11  |
| SMMPA13190 | 14 | 17 | 12 | 50  | 46  | 50  | 33  | 33  | 33  |
| SMMPA13191 | 29 | 23 | 32 | 51  | 31  | 23  | 31  | 21  | 27  |
| SMMPA13192 | 14 | 16 | 13 | 40  | 28  | 27  | 16  | 23  | 22  |
| SMMPA13193 | 15 | 21 | 9  | 22  | 19  | 8   | 13  | 19  | 9   |
| SMMPA13194 | 27 | 30 | 23 | 26  | 21  | 26  | 25  | 34  | 31  |
| SMMPA13195 | 9  | 2  | 6  | 134 | 104 | 89  | 61  | 78  | 81  |
| SMMPA13196 | 21 | 16 | 10 | 20  | 30  | 13  | 16  | 29  | 40  |
| SMMPA13197 | 18 | 28 | 10 | 40  | 31  | 25  | 24  | 25  | 35  |
| SMMPA13198 | 15 | 12 | 6  | 19  | 22  | 12  | 14  | 22  | 18  |
| SMMPA13199 | 7  | 4  | 8  | 12  | 7   | 18  | 13  | 16  | 16  |
| SMMPA13200 | 31 | 25 | 25 | 31  | 32  | 14  | 25  | 33  | 33  |
| SMMPA13201 | 17 | 17 | 17 | 99  | 77  | 53  | 46  | 56  | 48  |
| SMMPA13202 | 8  | 16 | 13 | 239 | 286 | 227 | 77  | 66  | 67  |
| SMMPA13203 | 8  | 14 | 17 | 547 | 470 | 524 | 166 | 195 | 171 |
| SMMPA13204 | 18 | 16 | 18 | 13  | 15  | 19  | 23  | 46  | 29  |
| SMMPA13205 | 13 | 13 | 15 | 178 | 218 | 156 | 64  | 61  | 61  |

|            |    |    |    |     |     |     |     |     |     |
|------------|----|----|----|-----|-----|-----|-----|-----|-----|
| SMMPA13206 | 24 | 20 | 18 | 65  | 67  | 58  | 26  | 33  | 33  |
| SMMPA13207 | 8  | 9  | 10 | 51  | 35  | 26  | 27  | 25  | 17  |
| SMMPA13208 | 30 | 24 | 14 | 89  | 82  | 52  | 38  | 40  | 38  |
| SMMPA13209 | 8  | 7  | 10 | 48  | 52  | 39  | 18  | 18  | 15  |
| SMMPA13210 | 20 | 17 | 14 | 106 | 94  | 85  | 92  | 94  | 97  |
| SMMPA13211 | 13 | 9  | 6  | 57  | 36  | 29  | 36  | 39  | 31  |
| SMMPA13212 | 3  | 9  | 14 | 30  | 24  | 18  | 35  | 30  | 43  |
| SMMPA13213 | 9  | 11 | 10 | 40  | 33  | 35  | 30  | 35  | 31  |
| SMMPA13214 | 9  | 8  | 6  | 49  | 46  | 43  | 39  | 40  | 48  |
| SMMPA13215 | 15 | 12 | 13 | 54  | 56  | 34  | 49  | 60  | 33  |
| SMMPA13216 | 4  | 7  | 5  | 16  | 16  | 13  | 15  | 23  | 13  |
| SMMPA13217 | 5  | 4  | 7  | 11  | 9   | 8   | 11  | 10  | 15  |
| SMMPA13218 | 12 | 8  | 9  | 48  | 50  | 40  | 47  | 42  | 65  |
| SMMPA13219 | 17 | 25 | 10 | 90  | 67  | 70  | 46  | 64  | 56  |
| SMMPA13220 | 8  | 10 | 15 | 10  | 14  | 9   | 10  | 13  | 13  |
| SMMPA13221 | 7  | 13 | 12 | 30  | 14  | 15  | 17  | 24  | 12  |
| SMMPA13222 | 7  | 2  | 11 | 3   | 8   | 10  | 2   | 12  | 5   |
| SMMPA13223 | 4  | 8  | 5  | 2   | 7   | 5   | 4   | 10  | 8   |
| SMMPA13224 | 27 | 20 | 11 | 20  | 17  | 13  | 31  | 34  | 23  |
| SMMPA13225 | 28 | 29 | 20 | 20  | 32  | 27  | 39  | 40  | 52  |
| SMMPA13226 | 19 | 15 | 23 | 18  | 16  | 12  | 15  | 21  | 17  |
| SMMPA13227 | 20 | 14 | 15 | 24  | 16  | 13  | 13  | 21  | 18  |
| SMMPA13228 | 19 | 18 | 19 | 43  | 56  | 47  | 37  | 56  | 37  |
| SMMPA13229 | 11 | 8  | 13 | 38  | 46  | 23  | 16  | 26  | 18  |
| SMMPA13230 | 15 | 24 | 23 | 52  | 39  | 49  | 37  | 48  | 50  |
| SMMPA13231 | 30 | 17 | 10 | 42  | 54  | 33  | 46  | 56  | 51  |
| SMMPA13232 | 24 | 33 | 29 | 31  | 29  | 40  | 34  | 28  | 33  |
| SMMPA13233 | 24 | 35 | 20 | 55  | 40  | 22  | 37  | 39  | 25  |
| SMMPA13234 | 17 | 18 | 19 | 40  | 43  | 29  | 23  | 24  | 40  |
| SMMPA13235 | 17 | 20 | 21 | 30  | 31  | 31  | 30  | 35  | 16  |
| SMMPA13236 | 11 | 18 | 8  | 21  | 18  | 11  | 9   | 14  | 18  |
| SMMPA13237 | 18 | 13 | 16 | 17  | 19  | 14  | 16  | 17  | 22  |
| SMMPA13238 | 14 | 20 | 15 | 24  | 16  | 18  | 20  | 30  | 25  |
| SMMPA13239 | 16 | 14 | 13 | 13  | 19  | 10  | 13  | 25  | 22  |
| SMMPA13240 | 30 | 35 | 31 | 402 | 414 | 318 | 217 | 290 | 269 |
| SMMPA13241 | 12 | 13 | 7  | 13  | 17  | 10  | 11  | 20  | 12  |
| SMMPA13242 | 10 | 22 | 6  | 31  | 45  | 34  | 21  | 28  | 38  |
| SMMPA13243 | 9  | 6  | 6  | 46  | 38  | 32  | 16  | 19  | 32  |
| SMMPA13244 | 17 | 11 | 15 | 17  | 16  | 20  | 16  | 36  | 31  |
| SMMPA13245 | 5  | 4  | 3  | 6   | 11  | 3   | 5   | 12  | 8   |
| SMMPA13246 | 25 | 18 | 24 | 72  | 66  | 61  | 48  | 47  | 51  |

|            |    |    |    |     |     |     |     |     |     |
|------------|----|----|----|-----|-----|-----|-----|-----|-----|
| SMMPA13247 | 9  | 6  | 5  | 68  | 64  | 51  | 40  | 42  | 39  |
| SMMPA13248 | 12 | 5  | 7  | 15  | 15  | 18  | 13  | 29  | 19  |
| SMMPA13249 | 14 | 7  | 9  | 26  | 19  | 25  | 15  | 15  | 18  |
| SMMPA13250 | 16 | 10 | 6  | 39  | 34  | 33  | 20  | 33  | 31  |
| SMMPA13251 | 14 | 19 | 12 | 34  | 31  | 16  | 20  | 23  | 23  |
| SMMPA13252 | 20 | 24 | 10 | 167 | 120 | 102 | 63  | 95  | 62  |
| SMMPA13253 | 25 | 34 | 23 | 172 | 115 | 123 | 72  | 95  | 82  |
| SMMPA13254 | 28 | 18 | 21 | 43  | 23  | 23  | 48  | 39  | 46  |
| SMMPA13255 | 7  | 12 | 8  | 37  | 40  | 27  | 20  | 25  | 12  |
| SMMPA13256 | 17 | 27 | 12 | 52  | 31  | 50  | 36  | 31  | 29  |
| SMMPA13257 | 27 | 52 | 40 | 73  | 60  | 43  | 71  | 90  | 83  |
| SMMPA13258 | 22 | 23 | 17 | 57  | 46  | 45  | 47  | 69  | 55  |
| SMMPA13259 | 65 | 54 | 67 | 123 | 121 | 107 | 58  | 72  | 73  |
| SMMPA13260 | 28 | 30 | 38 | 89  | 88  | 59  | 51  | 83  | 70  |
| SMMPA13261 | 30 | 30 | 27 | 20  | 25  | 25  | 25  | 38  | 39  |
| SMMPA13262 | 30 | 28 | 25 | 67  | 77  | 57  | 29  | 56  | 29  |
| SMMPA13263 | 33 | 21 | 29 | 182 | 145 | 106 | 114 | 164 | 154 |
| SMMPA13264 | 13 | 8  | 5  | 38  | 65  | 48  | 30  | 35  | 37  |
| SMMPA13265 | 27 | 24 | 12 | 331 | 301 | 270 | 219 | 287 | 239 |
| SMMPA13266 | 10 | 17 | 28 | 659 | 611 | 539 | 429 | 572 | 491 |
| SMMPA13267 | 11 | 31 | 17 | 664 | 595 | 502 | 451 | 567 | 518 |
| SMMPA13268 | 13 | 18 | 14 | 36  | 32  | 25  | 25  | 25  | 26  |
| SMMPA13269 | 8  | 12 | 14 | 23  | 15  | 14  | 15  | 21  | 20  |
| SMMPA13270 | 16 | 23 | 27 | 32  | 25  | 30  | 43  | 46  | 59  |
| SMMPA13271 | 14 | 19 | 27 | 16  | 21  | 13  | 28  | 22  | 30  |
| SMMPA13272 | 13 | 16 | 11 | 30  | 29  | 19  | 34  | 25  | 35  |
| SMMPA13273 | 3  | 3  | 1  | 2   | 5   | 1   | 0   | 1   | 1   |
| SMMPA13274 | 8  | 13 | 10 | 9   | 11  | 7   | 10  | 10  | 10  |
| SMMPA13275 | 21 | 16 | 21 | 28  | 31  | 44  | 22  | 23  | 16  |
| SMMPA13276 | 19 | 10 | 16 | 60  | 52  | 47  | 38  | 47  | 48  |
| SMMPA13277 | 11 | 24 | 16 | 78  | 70  | 63  | 46  | 57  | 52  |
| SMMPA13278 | 14 | 12 | 14 | 35  | 31  | 29  | 8   | 9   | 11  |
| SMMPA13279 | 6  | 6  | 7  | 5   | 4   | 2   | 1   | 8   | 11  |
| SMMPA13280 | 17 | 22 | 23 | 15  | 13  | 15  | 19  | 19  | 20  |
| SMMPA13281 | 15 | 17 | 18 | 13  | 14  | 18  | 26  | 34  | 36  |
| SMMPA13282 | 24 | 22 | 24 | 21  | 24  | 23  | 18  | 23  | 41  |
| SMMPA13283 | 16 | 13 | 10 | 16  | 14  | 16  | 16  | 21  | 13  |
| SMMPA13284 | 35 | 40 | 24 | 44  | 44  | 37  | 38  | 56  | 36  |
| SMMPA13285 | 0  | 3  | 0  | 0   | 0   | 1   | 4   | 2   | 2   |
| SMMPA13286 | 32 | 29 | 36 | 65  | 44  | 38  | 39  | 55  | 59  |
| SMMPA13287 | 13 | 21 | 12 | 55  | 49  | 40  | 39  | 42  | 33  |

|            |    |    |    |     |     |     |     |     |     |
|------------|----|----|----|-----|-----|-----|-----|-----|-----|
| SMMPA13288 | 8  | 9  | 4  | 26  | 23  | 29  | 23  | 20  | 26  |
| SMMPA13289 | 26 | 40 | 24 | 144 | 107 | 102 | 49  | 67  | 48  |
| SMMPA13290 | 12 | 13 | 6  | 28  | 30  | 21  | 15  | 24  | 12  |
| SMMPA13291 | 6  | 12 | 6  | 16  | 19  | 19  | 6   | 12  | 11  |
| SMMPA13292 | 14 | 14 | 13 | 33  | 46  | 25  | 29  | 20  | 24  |
| SMMPA13293 | 12 | 12 | 9  | 36  | 26  | 22  | 20  | 20  | 20  |
| SMMPA13294 | 17 | 11 | 14 | 52  | 45  | 32  | 37  | 47  | 25  |
| SMMPA13295 | 9  | 11 | 11 | 33  | 31  | 26  | 12  | 16  | 15  |
| SMMPA13296 | 8  | 13 | 5  | 34  | 23  | 35  | 21  | 26  | 21  |
| SMMPA13297 | 12 | 13 | 12 | 56  | 59  | 49  | 29  | 27  | 35  |
| SMMPA13298 | 27 | 34 | 13 | 39  | 28  | 23  | 33  | 27  | 40  |
| SMMPA13299 | 46 | 54 | 52 | 29  | 30  | 29  | 22  | 36  | 50  |
| SMMPA13300 | 12 | 27 | 23 | 26  | 22  | 24  | 27  | 27  | 38  |
| SMMPA13301 | 16 | 18 | 27 | 64  | 67  | 63  | 33  | 34  | 35  |
| SMMPA13302 | 32 | 30 | 26 | 22  | 25  | 24  | 17  | 29  | 30  |
| SMMPA13303 | 17 | 23 | 20 | 27  | 20  | 25  | 34  | 31  | 39  |
| SMMPA13304 | 40 | 29 | 27 | 61  | 51  | 36  | 50  | 55  | 52  |
| SMMPA13305 | 27 | 14 | 21 | 38  | 33  | 27  | 30  | 28  | 34  |
| SMMPA13306 | 34 | 35 | 25 | 49  | 41  | 41  | 26  | 63  | 44  |
| SMMPA13307 | 28 | 25 | 33 | 26  | 30  | 27  | 32  | 47  | 44  |
| SMMPA13308 | 15 | 12 | 8  | 19  | 18  | 17  | 15  | 13  | 23  |
| SMMPA13309 | 21 | 18 | 17 | 39  | 36  | 36  | 27  | 36  | 27  |
| SMMPA13310 | 19 | 26 | 10 | 32  | 24  | 23  | 21  | 41  | 41  |
| SMMPA13311 | 29 | 31 | 18 | 54  | 49  | 35  | 45  | 48  | 47  |
| SMMPA13312 | 27 | 25 | 26 | 74  | 73  | 48  | 42  | 57  | 52  |
| SMMPA13313 | 19 | 19 | 13 | 86  | 91  | 74  | 69  | 88  | 97  |
| SMMPA13314 | 21 | 26 | 24 | 114 | 109 | 84  | 57  | 104 | 81  |
| SMMPA13315 | 27 | 21 | 25 | 310 | 310 | 272 | 154 | 195 | 169 |
| SMMPA13316 | 21 | 19 | 17 | 69  | 65  | 46  | 37  | 29  | 42  |
| SMMPA13317 | 18 | 16 | 12 | 46  | 56  | 26  | 34  | 37  | 33  |
| SMMPA13318 | 21 | 23 | 13 | 180 | 175 | 131 | 91  | 130 | 126 |
| SMMPA13319 | 15 | 18 | 22 | 101 | 72  | 65  | 42  | 58  | 50  |
| SMMPA13320 | 15 | 12 | 13 | 74  | 62  | 54  | 22  | 49  | 28  |
| SMMPA13321 | 28 | 33 | 20 | 90  | 85  | 68  | 45  | 77  | 77  |
| SMMPA13322 | 15 | 10 | 10 | 148 | 155 | 151 | 48  | 70  | 75  |
| SMMPA13323 | 9  | 9  | 5  | 6   | 7   | 7   | 7   | 19  | 7   |
| SMMPA13324 | 11 | 19 | 13 | 15  | 22  | 21  | 17  | 31  | 11  |
| SMMPA13325 | 8  | 5  | 11 | 5   | 7   | 3   | 18  | 22  | 12  |
| SMMPA13326 | 22 | 17 | 14 | 88  | 94  | 53  | 65  | 84  | 61  |
| SMMPA13327 | 13 | 19 | 15 | 88  | 92  | 58  | 62  | 78  | 61  |
| SMMPA13328 | 16 | 14 | 7  | 14  | 12  | 14  | 9   | 16  | 10  |

|            |    |    |    |     |     |     |     |     |     |
|------------|----|----|----|-----|-----|-----|-----|-----|-----|
| SMMPA13329 | 2  | 3  | 8  | 3   | 1   | 4   | 11  | 5   | 8   |
| SMMPA13330 | 12 | 11 | 5  | 38  | 43  | 30  | 23  | 34  | 39  |
| SMMPA13331 | 9  | 13 | 9  | 10  | 10  | 11  | 7   | 15  | 18  |
| SMMPA13332 | 14 | 12 | 6  | 71  | 67  | 58  | 33  | 38  | 39  |
| SMMPA13333 | 17 | 20 | 14 | 97  | 83  | 89  | 37  | 51  | 57  |
| SMMPA13334 | 22 | 21 | 15 | 71  | 73  | 74  | 52  | 68  | 63  |
| SMMPA13335 | 26 | 37 | 27 | 134 | 108 | 108 | 46  | 65  | 54  |
| SMMPA13336 | 17 | 31 | 19 | 124 | 108 | 91  | 57  | 66  | 71  |
| SMMPA13337 | 26 | 27 | 20 | 155 | 138 | 119 | 39  | 75  | 82  |
| SMMPA13338 | 8  | 4  | 6  | 30  | 29  | 24  | 14  | 14  | 14  |
| SMMPA13339 | 53 | 51 | 37 | 541 | 509 | 395 | 189 | 235 | 234 |
| SMMPA13340 | 30 | 27 | 31 | 230 | 211 | 139 | 98  | 128 | 100 |
| SMMPA13341 | 3  | 2  | 6  | 16  | 10  | 4   | 14  | 10  | 8   |
| SMMPA13342 | 9  | 11 | 9  | 22  | 35  | 19  | 10  | 20  | 23  |
| SMMPA13343 | 9  | 6  | 8  | 25  | 27  | 24  | 17  | 19  | 20  |
| SMMPA13344 | 13 | 13 | 21 | 32  | 30  | 38  | 18  | 33  | 22  |
| SMMPA13345 | 19 | 9  | 8  | 24  | 21  | 11  | 17  | 18  | 16  |
| SMMPA13346 | 28 | 40 | 31 | 31  | 29  | 27  | 30  | 40  | 36  |
| SMMPA13347 | 17 | 12 | 16 | 25  | 26  | 29  | 19  | 40  | 31  |
| SMMPA13348 | 13 | 28 | 20 | 44  | 41  | 26  | 30  | 31  | 35  |
| SMMPA13349 | 17 | 12 | 14 | 22  | 23  | 18  | 16  | 14  | 22  |
| SMMPA13350 | 14 | 24 | 21 | 115 | 115 | 93  | 54  | 81  | 62  |
| SMMPA13351 | 16 | 23 | 23 | 101 | 99  | 77  | 55  | 87  | 99  |
| SMMPA13352 | 11 | 12 | 4  | 20  | 18  | 16  | 16  | 20  | 16  |
| SMMPA13353 | 20 | 17 | 8  | 38  | 28  | 28  | 21  | 36  | 22  |
| SMMPA13354 | 16 | 18 | 21 | 35  | 15  | 30  | 30  | 32  | 27  |
| SMMPA13355 | 30 | 22 | 17 | 26  | 29  | 18  | 35  | 32  | 35  |
| SMMPA13356 | 16 | 19 | 23 | 48  | 43  | 40  | 37  | 58  | 47  |
| SMMPA13357 | 13 | 11 | 10 | 9   | 12  | 11  | 12  | 19  | 18  |
| SMMPA13358 | 25 | 23 | 17 | 17  | 12  | 29  | 9   | 31  | 32  |
| SMMPA13359 | 14 | 24 | 18 | 27  | 18  | 27  | 33  | 31  | 40  |
| SMMPA13360 | 17 | 27 | 18 | 28  | 26  | 25  | 27  | 50  | 29  |
| SMMPA13361 | 10 | 7  | 8  | 42  | 42  | 21  | 32  | 35  | 37  |
| SMMPA13362 | 27 | 36 | 37 | 56  | 46  | 45  | 48  | 73  | 61  |
| SMMPA13363 | 22 | 25 | 24 | 40  | 39  | 38  | 40  | 59  | 33  |
| SMMPA13364 | 23 | 25 | 19 | 55  | 42  | 45  | 49  | 53  | 39  |
| SMMPA13365 | 33 | 26 | 19 | 46  | 54  | 35  | 31  | 47  | 48  |
| SMMPA13366 | 25 | 12 | 23 | 57  | 37  | 44  | 26  | 43  | 39  |
| SMMPA13367 | 19 | 30 | 23 | 67  | 51  | 52  | 43  | 57  | 59  |
| SMMPA13368 | 24 | 36 | 22 | 36  | 50  | 43  | 27  | 55  | 50  |
| SMMPA13369 | 19 | 18 | 18 | 58  | 59  | 57  | 29  | 51  | 29  |

|            |    |    |    |     |     |     |     |     |     |
|------------|----|----|----|-----|-----|-----|-----|-----|-----|
| SMMPA13370 | 28 | 21 | 16 | 57  | 49  | 36  | 30  | 50  | 33  |
| SMMPA13371 | 31 | 29 | 25 | 150 | 118 | 104 | 94  | 138 | 119 |
| SMMPA13372 | 35 | 27 | 27 | 31  | 29  | 27  | 37  | 53  | 45  |
| SMMPA13373 | 20 | 17 | 20 | 134 | 144 | 87  | 74  | 104 | 96  |
| SMMPA13374 | 24 | 25 | 19 | 172 | 203 | 128 | 97  | 120 | 139 |
| SMMPA13375 | 14 | 15 | 9  | 227 | 204 | 181 | 72  | 131 | 113 |
| SMMPA13376 | 32 | 20 | 24 | 75  | 82  | 69  | 49  | 65  | 72  |
| SMMPA13377 | 21 | 21 | 17 | 101 | 99  | 69  | 60  | 78  | 63  |
| SMMPA13378 | 35 | 33 | 35 | 244 | 249 | 147 | 138 | 167 | 152 |
| SMMPA13379 | 26 | 27 | 24 | 369 | 380 | 262 | 149 | 221 | 207 |
| SMMPA13380 | 15 | 10 | 10 | 57  | 61  | 49  | 24  | 31  | 24  |
| SMMPA13381 | 34 | 19 | 7  | 179 | 193 | 129 | 45  | 106 | 84  |
| SMMPA13382 | 33 | 36 | 21 | 63  | 59  | 32  | 37  | 50  | 46  |
| SMMPA13383 | 12 | 12 | 16 | 18  | 30  | 19  | 7   | 15  | 18  |
| SMMPA13384 | 56 | 56 | 46 | 337 | 301 | 221 | 123 | 137 | 130 |
| SMMPA13385 | 31 | 28 | 20 | 34  | 34  | 29  | 27  | 28  | 21  |
| SMMPA13386 | 12 | 24 | 22 | 25  | 23  | 23  | 18  | 31  | 22  |
| SMMPA13387 | 7  | 14 | 8  | 17  | 16  | 19  | 17  | 28  | 17  |
| SMMPA13388 | 16 | 19 | 28 | 42  | 44  | 39  | 40  | 31  | 42  |
| SMMPA13389 | 23 | 24 | 20 | 10  | 22  | 16  | 27  | 28  | 44  |
| SMMPA13390 | 40 | 38 | 28 | 65  | 56  | 49  | 37  | 58  | 40  |
| SMMPA13391 | 4  | 3  | 6  | 6   | 1   | 4   | 7   | 8   | 5   |
| SMMPA13392 | 13 | 14 | 20 | 19  | 21  | 27  | 31  | 32  | 35  |
| SMMPA13393 | 25 | 17 | 22 | 54  | 24  | 38  | 38  | 56  | 50  |
| SMMPA13394 | 20 | 23 | 24 | 37  | 26  | 29  | 27  | 27  | 29  |
| SMMPA13395 | 21 | 27 | 17 | 48  | 22  | 28  | 19  | 31  | 29  |
| SMMPA13396 | 24 | 31 | 23 | 34  | 25  | 30  | 24  | 23  | 26  |
| SMMPA13397 | 46 | 44 | 39 | 111 | 115 | 76  | 71  | 91  | 87  |
| SMMPA13398 | 10 | 15 | 12 | 23  | 18  | 27  | 15  | 23  | 36  |
| SMMPA13399 | 45 | 44 | 22 | 62  | 64  | 54  | 35  | 34  | 39  |
| SMMPA13400 | 39 | 39 | 30 | 131 | 134 | 108 | 53  | 73  | 58  |
| SMMPA13401 | 40 | 26 | 27 | 65  | 66  | 53  | 31  | 44  | 39  |
| SMMPA13402 | 24 | 24 | 20 | 31  | 29  | 22  | 17  | 28  | 28  |
| SMMPA13403 | 9  | 7  | 5  | 6   | 9   | 7   | 11  | 13  | 9   |
| SMMPA13404 | 12 | 6  | 10 | 52  | 42  | 29  | 19  | 35  | 25  |
| SMMPA13405 | 5  | 3  | 3  | 90  | 64  | 64  | 35  | 48  | 38  |
| SMMPA13406 | 17 | 27 | 22 | 20  | 15  | 16  | 14  | 22  | 23  |
| SMMPA13407 | 16 | 16 | 17 | 64  | 85  | 66  | 39  | 73  | 65  |
| SMMPA13408 | 32 | 20 | 23 | 43  | 48  | 36  | 33  | 50  | 41  |
| SMMPA13409 | 17 | 18 | 24 | 353 | 302 | 231 | 152 | 196 | 170 |
| SMMPA13410 | 26 | 37 | 38 | 275 | 227 | 178 | 107 | 141 | 143 |



|            |    |     |    |     |     |     |     |     |     |
|------------|----|-----|----|-----|-----|-----|-----|-----|-----|
| SMMPA13411 | 27 | 27  | 27 | 144 | 119 | 102 | 57  | 69  | 62  |
| SMMPA13412 | 7  | 6   | 13 | 20  | 28  | 18  | 5   | 12  | 12  |
| SMMPA13413 | 14 | 14  | 20 | 24  | 13  | 15  | 10  | 19  | 18  |
| SMMPA13414 | 14 | 16  | 12 | 31  | 33  | 25  | 20  | 24  | 25  |
| SMMPA13415 | 26 | 20  | 22 | 41  | 31  | 29  | 28  | 36  | 28  |
| SMMPA13416 | 7  | 5   | 11 | 10  | 12  | 7   | 6   | 22  | 15  |
| SMMPA13417 | 13 | 14  | 14 | 24  | 19  | 20  | 14  | 25  | 14  |
| SMMPA13418 | 22 | 19  | 19 | 36  | 37  | 29  | 28  | 34  | 33  |
| SMMPA13419 | 16 | 15  | 14 | 25  | 25  | 19  | 9   | 19  | 18  |
| SMMPA13420 | 12 | 20  | 8  | 21  | 19  | 21  | 22  | 23  | 34  |
| SMMPA13421 | 13 | 16  | 9  | 32  | 21  | 10  | 19  | 26  | 23  |
| SMMPA13422 | 14 | 10  | 8  | 18  | 15  | 18  | 11  | 21  | 13  |
| SMMPA13423 | 50 | 45  | 45 | 34  | 43  | 40  | 49  | 72  | 53  |
| SMMPA13424 | 86 | 100 | 76 | 52  | 49  | 50  | 66  | 87  | 99  |
| SMMPA13425 | 50 | 52  | 45 | 38  | 38  | 30  | 50  | 63  | 59  |
| SMMPA13426 | 27 | 28  | 20 | 36  | 21  | 20  | 41  | 84  | 63  |
| SMMPA13427 | 19 | 23  | 30 | 61  | 42  | 41  | 46  | 42  | 38  |
| SMMPA13428 | 93 | 85  | 74 | 60  | 57  | 63  | 67  | 92  | 100 |
| SMMPA13429 | 91 | 76  | 64 | 73  | 70  | 56  | 80  | 97  | 94  |
| SMMPA13430 | 14 | 20  | 14 | 23  | 34  | 23  | 37  | 40  | 52  |
| SMMPA13431 | 61 | 55  | 49 | 35  | 43  | 42  | 40  | 59  | 52  |
| SMMPA13432 | 23 | 16  | 10 | 28  | 28  | 25  | 27  | 25  | 24  |
| SMMPA13433 | 16 | 9   | 14 | 17  | 34  | 25  | 15  | 23  | 17  |
| SMMPA13434 | 24 | 29  | 31 | 165 | 166 | 146 | 76  | 106 | 99  |
| SMMPA13435 | 31 | 20  | 34 | 140 | 95  | 90  | 53  | 77  | 72  |
| SMMPA13436 | 29 | 30  | 42 | 36  | 38  | 39  | 33  | 48  | 59  |
| SMMPA13437 | 11 | 12  | 13 | 13  | 13  | 13  | 16  | 21  | 21  |
| SMMPA13438 | 47 | 61  | 41 | 155 | 139 | 90  | 75  | 88  | 89  |
| SMMPA13439 | 40 | 33  | 23 | 33  | 37  | 33  | 50  | 46  | 57  |
| SMMPA13440 | 16 | 27  | 18 | 59  | 62  | 45  | 33  | 45  | 44  |
| SMMPA13441 | 27 | 17  | 16 | 27  | 37  | 41  | 37  | 45  | 38  |
| SMMPA13442 | 16 | 30  | 24 | 57  | 42  | 57  | 36  | 40  | 47  |
| SMMPA13443 | 47 | 47  | 46 | 185 | 166 | 117 | 103 | 147 | 132 |
| SMMPA13444 | 6  | 3   | 3  | 8   | 10  | 2   | 7   | 13  | 7   |
| SMMPA13445 | 21 | 30  | 19 | 69  | 67  | 53  | 36  | 51  | 37  |
| SMMPA13446 | 2  | 1   | 3  | 9   | 10  | 8   | 11  | 14  | 6   |
| SMMPA13447 | 4  | 4   | 3  | 7   | 9   | 11  | 11  | 19  | 8   |
| SMMPA13448 | 17 | 7   | 12 | 36  | 37  | 28  | 23  | 29  | 16  |
| SMMPA13449 | 12 | 14  | 8  | 58  | 57  | 45  | 40  | 38  | 32  |
| SMMPA13450 | 13 | 14  | 17 | 27  | 29  | 36  | 14  | 24  | 16  |
| SMMPA13451 | 10 | 13  | 9  | 19  | 16  | 23  | 16  | 24  | 22  |

|            |    |    |    |     |     |     |    |     |    |
|------------|----|----|----|-----|-----|-----|----|-----|----|
| SMMPA13452 | 20 | 20 | 22 | 145 | 104 | 91  | 73 | 95  | 78 |
| SMMPA13453 | 1  | 0  | 0  | 4   | 2   | 3   | 3  | 0   | 2  |
| SMMPA13454 | 12 | 14 | 8  | 9   | 15  | 19  | 19 | 31  | 12 |
| SMMPA13455 | 30 | 46 | 38 | 101 | 104 | 87  | 59 | 80  | 57 |
| SMMPA13456 | 9  | 9  | 8  | 36  | 33  | 19  | 17 | 23  | 17 |
| SMMPA13457 | 13 | 20 | 17 | 62  | 46  | 48  | 21 | 30  | 32 |
| SMMPA13458 | 15 | 16 | 16 | 30  | 16  | 23  | 15 | 24  | 19 |
| SMMPA13459 | 10 | 16 | 7  | 13  | 15  | 9   | 7  | 12  | 11 |
| SMMPA13460 | 7  | 5  | 8  | 56  | 30  | 33  | 27 | 26  | 20 |
| SMMPA13461 | 11 | 12 | 8  | 17  | 13  | 17  | 25 | 30  | 28 |
| SMMPA13462 | 7  | 1  | 7  | 3   | 1   | 1   | 1  | 1   | 2  |
| SMMPA13463 | 39 | 42 | 51 | 60  | 63  | 56  | 42 | 39  | 58 |
| SMMPA13464 | 6  | 6  | 9  | 43  | 22  | 18  | 24 | 39  | 31 |
| SMMPA13465 | 23 | 25 | 13 | 51  | 38  | 39  | 32 | 28  | 32 |
| SMMPA13466 | 15 | 12 | 12 | 35  | 44  | 36  | 23 | 28  | 24 |
| SMMPA13467 | 8  | 19 | 9  | 80  | 67  | 52  | 34 | 47  | 52 |
| SMMPA13468 | 20 | 14 | 15 | 22  | 32  | 22  | 27 | 45  | 27 |
| SMMPA13469 | 12 | 9  | 13 | 17  | 9   | 13  | 4  | 8   | 13 |
| SMMPA13470 | 14 | 18 | 16 | 18  | 22  | 17  | 17 | 23  | 19 |
| SMMPA13471 | 5  | 11 | 14 | 47  | 33  | 24  | 17 | 48  | 39 |
| SMMPA13472 | 19 | 28 | 16 | 27  | 19  | 22  | 29 | 34  | 33 |
| SMMPA13473 | 18 | 23 | 17 | 83  | 79  | 75  | 79 | 98  | 98 |
| SMMPA13474 | 13 | 19 | 17 | 30  | 24  | 27  | 18 | 31  | 28 |
| SMMPA13475 | 15 | 24 | 16 | 54  | 59  | 44  | 29 | 36  | 34 |
| SMMPA13476 | 12 | 17 | 14 | 29  | 30  | 34  | 20 | 23  | 17 |
| SMMPA13477 | 15 | 22 | 23 | 18  | 18  | 22  | 20 | 32  | 27 |
| SMMPA13478 | 22 | 22 | 19 | 29  | 26  | 22  | 43 | 42  | 39 |
| SMMPA13479 | 23 | 18 | 18 | 40  | 38  | 38  | 33 | 45  | 33 |
| SMMPA13480 | 26 | 32 | 21 | 41  | 37  | 40  | 41 | 34  | 55 |
| SMMPA13481 | 25 | 27 | 23 | 24  | 16  | 22  | 24 | 29  | 35 |
| SMMPA13482 | 32 | 20 | 27 | 39  | 34  | 33  | 35 | 47  | 60 |
| SMMPA13483 | 16 | 17 | 17 | 32  | 32  | 21  | 22 | 20  | 30 |
| SMMPA13484 | 28 | 32 | 18 | 28  | 30  | 32  | 41 | 43  | 41 |
| SMMPA13485 | 38 | 45 | 36 | 19  | 24  | 29  | 28 | 28  | 47 |
| SMMPA13486 | 27 | 28 | 16 | 67  | 62  | 51  | 45 | 45  | 59 |
| SMMPA13487 | 15 | 22 | 20 | 66  | 68  | 52  | 35 | 41  | 42 |
| SMMPA13488 | 0  | 1  | 2  | 16  | 9   | 5   | 3  | 8   | 7  |
| SMMPA13489 | 6  | 12 | 8  | 17  | 14  | 9   | 7  | 15  | 12 |
| SMMPA13490 | 15 | 28 | 15 | 30  | 35  | 40  | 20 | 28  | 20 |
| SMMPA13491 | 24 | 33 | 25 | 80  | 59  | 43  | 33 | 57  | 42 |
| SMMPA13492 | 21 | 20 | 18 | 204 | 187 | 146 | 85 | 119 | 98 |

|            |    |    |    |     |     |     |     |     |     |
|------------|----|----|----|-----|-----|-----|-----|-----|-----|
| SMMPA13493 | 3  | 11 | 7  | 4   | 7   | 7   | 10  | 8   | 13  |
| SMMPA13494 | 25 | 21 | 16 | 17  | 23  | 16  | 30  | 39  | 32  |
| SMMPA13495 | 19 | 12 | 19 | 22  | 24  | 22  | 17  | 28  | 24  |
| SMMPA13496 | 5  | 2  | 2  | 5   | 4   | 7   | 2   | 2   | 3   |
| SMMPA13497 | 36 | 33 | 34 | 27  | 47  | 25  | 35  | 49  | 48  |
| SMMPA13498 | 25 | 14 | 21 | 36  | 19  | 31  | 30  | 27  | 39  |
| SMMPA13499 | 19 | 14 | 24 | 61  | 49  | 54  | 52  | 73  | 69  |
| SMMPA13500 | 21 | 21 | 24 | 55  | 49  | 50  | 31  | 32  | 43  |
| SMMPA13501 | 7  | 14 | 8  | 225 | 162 | 168 | 74  | 109 | 74  |
| SMMPA13502 | 7  | 18 | 13 | 31  | 52  | 32  | 17  | 27  | 24  |
| SMMPA13503 | 16 | 21 | 13 | 74  | 73  | 57  | 25  | 42  | 37  |
| SMMPA13504 | 5  | 10 | 8  | 36  | 42  | 26  | 33  | 29  | 34  |
| SMMPA13505 | 18 | 20 | 27 | 74  | 56  | 47  | 42  | 60  | 67  |
| SMMPA13506 | 25 | 19 | 19 | 66  | 66  | 61  | 42  | 48  | 52  |
| SMMPA13507 | 17 | 17 | 13 | 134 | 117 | 79  | 45  | 67  | 57  |
| SMMPA13508 | 14 | 22 | 13 | 63  | 59  | 42  | 33  | 40  | 54  |
| SMMPA13509 | 9  | 9  | 10 | 36  | 36  | 27  | 18  | 31  | 24  |
| SMMPA13510 | 7  | 16 | 14 | 46  | 33  | 25  | 29  | 24  | 20  |
| SMMPA13511 | 27 | 10 | 20 | 65  | 59  | 44  | 32  | 46  | 50  |
| SMMPA13512 | 12 | 17 | 8  | 131 | 118 | 122 | 98  | 145 | 121 |
| SMMPA13513 | 1  | 3  | 5  | 8   | 8   | 6   | 1   | 11  | 9   |
| SMMPA13514 | 9  | 15 | 12 | 48  | 51  | 44  | 38  | 57  | 53  |
| SMMPA13515 | 18 | 17 | 8  | 14  | 17  | 22  | 19  | 23  | 19  |
| SMMPA13516 | 11 | 14 | 6  | 7   | 14  | 11  | 15  | 18  | 9   |
| SMMPA13517 | 10 | 9  | 7  | 7   | 13  | 12  | 12  | 11  | 18  |
| SMMPA13518 | 4  | 3  | 10 | 8   | 12  | 8   | 11  | 11  | 7   |
| SMMPA13519 | 15 | 17 | 14 | 45  | 32  | 32  | 38  | 49  | 44  |
| SMMPA13520 | 13 | 15 | 14 | 25  | 30  | 29  | 17  | 25  | 25  |
| SMMPA13521 | 30 | 27 | 25 | 78  | 63  | 59  | 41  | 50  | 53  |
| SMMPA13522 | 8  | 10 | 12 | 11  | 14  | 14  | 11  | 25  | 23  |
| SMMPA13523 | 15 | 9  | 11 | 27  | 12  | 16  | 9   | 24  | 23  |
| SMMPA13524 | 1  | 2  | 2  | 8   | 5   | 9   | 4   | 10  | 5   |
| SMMPA13525 | 15 | 16 | 13 | 18  | 27  | 20  | 18  | 26  | 15  |
| SMMPA13526 | 33 | 37 | 24 | 210 | 189 | 137 | 87  | 113 | 104 |
| SMMPA13527 | 7  | 7  | 7  | 33  | 26  | 17  | 9   | 21  | 15  |
| SMMPA13528 | 30 | 28 | 26 | 82  | 70  | 58  | 33  | 31  | 55  |
| SMMPA13529 | 10 | 17 | 14 | 52  | 31  | 37  | 20  | 33  | 28  |
| SMMPA13530 | 13 | 14 | 23 | 45  | 35  | 29  | 16  | 20  | 21  |
| SMMPA13531 | 15 | 26 | 21 | 147 | 106 | 104 | 56  | 62  | 47  |
| SMMPA13532 | 43 | 50 | 38 | 651 | 621 | 529 | 233 | 305 | 280 |
| SMMPA13533 | 6  | 9  | 9  | 25  | 24  | 18  | 10  | 18  | 13  |

|            |    |    |    |     |     |     |     |     |     |
|------------|----|----|----|-----|-----|-----|-----|-----|-----|
| SMMPA13534 | 32 | 36 | 29 | 44  | 56  | 36  | 32  | 32  | 40  |
| SMMPA13535 | 71 | 63 | 53 | 120 | 109 | 82  | 65  | 91  | 77  |
| SMMPA13536 | 18 | 20 | 14 | 46  | 40  | 31  | 20  | 25  | 29  |
| SMMPA13537 | 29 | 35 | 17 | 51  | 57  | 43  | 30  | 42  | 29  |
| SMMPA13538 | 24 | 21 | 10 | 32  | 24  | 29  | 40  | 36  | 40  |
| SMMPA13539 | 28 | 26 | 23 | 71  | 72  | 47  | 46  | 28  | 45  |
| SMMPA13540 | 35 | 31 | 26 | 55  | 54  | 33  | 46  | 42  | 42  |
| SMMPA13541 | 11 | 13 | 14 | 13  | 20  | 14  | 22  | 27  | 23  |
| SMMPA13542 | 19 | 18 | 14 | 48  | 40  | 41  | 32  | 53  | 48  |
| SMMPA13543 | 22 | 30 | 15 | 19  | 28  | 29  | 18  | 29  | 34  |
| SMMPA13544 | 20 | 28 | 25 | 23  | 25  | 26  | 26  | 43  | 29  |
| SMMPA13545 | 34 | 18 | 38 | 47  | 48  | 52  | 34  | 52  | 35  |
| SMMPA13546 | 10 | 16 | 15 | 233 | 212 | 174 | 95  | 119 | 93  |
| SMMPA13547 | 17 | 7  | 12 | 16  | 17  | 7   | 8   | 23  | 19  |
| SMMPA13548 | 18 | 10 | 10 | 34  | 32  | 29  | 21  | 35  | 31  |
| SMMPA13549 | 19 | 23 | 22 | 30  | 26  | 26  | 23  | 46  | 49  |
| SMMPA13550 | 25 | 27 | 16 | 50  | 43  | 46  | 41  | 46  | 40  |
| SMMPA13551 | 13 | 11 | 8  | 13  | 5   | 7   | 15  | 13  | 19  |
| SMMPA13552 | 31 | 22 | 17 | 27  | 30  | 23  | 28  | 42  | 54  |
| SMMPA13553 | 24 | 28 | 18 | 90  | 96  | 69  | 73  | 78  | 68  |
| SMMPA13554 | 12 | 16 | 13 | 85  | 52  | 53  | 35  | 51  | 43  |
| SMMPA13555 | 16 | 17 | 19 | 31  | 31  | 22  | 22  | 30  | 36  |
| SMMPA13556 | 25 | 16 | 20 | 280 | 226 | 196 | 134 | 161 | 152 |
| SMMPA13557 | 13 | 11 | 22 | 165 | 121 | 108 | 38  | 64  | 58  |
| SMMPA13558 | 27 | 17 | 25 | 306 | 276 | 225 | 105 | 124 | 104 |
| SMMPA13559 | 18 | 27 | 11 | 254 | 234 | 191 | 132 | 150 | 133 |
| SMMPA13560 | 28 | 25 | 17 | 241 | 191 | 180 | 129 | 172 | 143 |
| SMMPA13561 | 18 | 18 | 22 | 177 | 162 | 122 | 89  | 120 | 96  |
| SMMPA13562 | 20 | 34 | 32 | 490 | 420 | 326 | 209 | 285 | 229 |
| SMMPA13563 | 5  | 9  | 8  | 22  | 24  | 20  | 16  | 23  | 20  |
| SMMPA13564 | 9  | 10 | 13 | 55  | 48  | 23  | 30  | 31  | 32  |
| SMMPA13565 | 15 | 15 | 13 | 30  | 27  | 27  | 20  | 25  | 14  |
| SMMPA13566 | 34 | 26 | 19 | 75  | 52  | 55  | 45  | 38  | 57  |
| SMMPA13567 | 8  | 12 | 10 | 16  | 10  | 6   | 12  | 13  | 21  |
| SMMPA13568 | 37 | 40 | 43 | 74  | 81  | 69  | 61  | 86  | 77  |
| SMMPA13569 | 13 | 22 | 16 | 44  | 37  | 31  | 24  | 58  | 43  |
| SMMPA13570 | 23 | 33 | 21 | 49  | 34  | 40  | 28  | 45  | 52  |
| SMMPA13571 | 27 | 16 | 19 | 38  | 28  | 30  | 35  | 38  | 41  |
| SMMPA13572 | 23 | 21 | 21 | 27  | 29  | 22  | 33  | 41  | 58  |
| SMMPA13573 | 14 | 15 | 10 | 42  | 22  | 25  | 28  | 24  | 26  |
| SMMPA13574 | 18 | 10 | 6  | 78  | 69  | 82  | 39  | 69  | 54  |

|            |    |    |    |     |     |     |     |     |     |
|------------|----|----|----|-----|-----|-----|-----|-----|-----|
| SMMPA13575 | 14 | 9  | 9  | 6   | 13  | 11  | 5   | 9   | 4   |
| SMMPA13576 | 13 | 6  | 5  | 23  | 16  | 19  | 11  | 13  | 12  |
| SMMPA13577 | 10 | 14 | 9  | 11  | 12  | 16  | 23  | 16  | 22  |
| SMMPA13578 | 13 | 14 | 15 | 17  | 21  | 26  | 14  | 24  | 15  |
| SMMPA13579 | 18 | 21 | 21 | 28  | 30  | 21  | 12  | 24  | 33  |
| SMMPA13580 | 29 | 11 | 14 | 40  | 40  | 37  | 49  | 54  | 59  |
| SMMPA13581 | 18 | 10 | 6  | 18  | 19  | 11  | 13  | 27  | 21  |
| SMMPA13582 | 10 | 10 | 18 | 35  | 38  | 25  | 17  | 30  | 29  |
| SMMPA13583 | 9  | 11 | 10 | 9   | 13  | 12  | 12  | 18  | 18  |
| SMMPA13584 | 6  | 19 | 12 | 35  | 29  | 23  | 15  | 21  | 19  |
| SMMPA13585 | 19 | 11 | 14 | 10  | 11  | 11  | 17  | 12  | 18  |
| SMMPA13586 | 6  | 2  | 6  | 32  | 29  | 28  | 16  | 18  | 18  |
| SMMPA13587 | 21 | 24 | 13 | 231 | 193 | 177 | 114 | 138 | 129 |
| SMMPA13588 | 25 | 21 | 25 | 66  | 54  | 44  | 47  | 63  | 59  |
| SMMPA13589 | 20 | 24 | 21 | 53  | 41  | 54  | 45  | 34  | 54  |
| SMMPA13590 | 5  | 11 | 11 | 14  | 21  | 10  | 14  | 19  | 20  |
| SMMPA13591 | 19 | 22 | 23 | 100 | 72  | 66  | 37  | 68  | 68  |
| SMMPA13592 | 19 | 23 | 25 | 186 | 183 | 179 | 90  | 111 | 96  |
| SMMPA13593 | 23 | 25 | 13 | 43  | 37  | 31  | 30  | 25  | 40  |
| SMMPA13594 | 7  | 15 | 13 | 78  | 74  | 63  | 56  | 57  | 57  |
| SMMPA13595 | 21 | 19 | 16 | 83  | 89  | 64  | 47  | 46  | 55  |
| SMMPA13596 | 10 | 19 | 21 | 79  | 85  | 57  | 37  | 42  | 41  |
| SMMPA13597 | 36 | 31 | 24 | 660 | 591 | 546 | 265 | 346 | 318 |
| SMMPA13598 | 8  | 16 | 13 | 112 | 124 | 93  | 59  | 58  | 86  |
| SMMPA13599 | 13 | 24 | 22 | 89  | 111 | 84  | 50  | 73  | 72  |
| SMMPA13600 | 18 | 16 | 20 | 119 | 111 | 86  | 41  | 62  | 70  |
| SMMPA13601 | 19 | 23 | 19 | 56  | 57  | 45  | 32  | 58  | 46  |
| SMMPA13602 | 32 | 29 | 26 | 272 | 283 | 193 | 134 | 146 | 134 |
| SMMPA13603 | 15 | 12 | 17 | 43  | 36  | 25  | 26  | 33  | 31  |
| SMMPA13604 | 35 | 40 | 33 | 136 | 120 | 104 | 66  | 89  | 79  |
| SMMPA13605 | 12 | 16 | 18 | 128 | 83  | 78  | 50  | 63  | 56  |
| SMMPA13606 | 20 | 28 | 13 | 39  | 36  | 25  | 30  | 43  | 37  |
| SMMPA13607 | 31 | 54 | 39 | 530 | 507 | 445 | 267 | 373 | 291 |
| SMMPA13608 | 25 | 26 | 21 | 52  | 51  | 41  | 33  | 50  | 56  |
| SMMPA13609 | 34 | 28 | 33 | 19  | 29  | 21  | 58  | 67  | 69  |
| SMMPA13610 | 21 | 20 | 19 | 103 | 71  | 60  | 59  | 67  | 52  |
| SMMPA13611 | 11 | 11 | 11 | 107 | 74  | 80  | 48  | 45  | 48  |
| SMMPA13612 | 18 | 21 | 25 | 51  | 70  | 58  | 29  | 47  | 34  |
| SMMPA13613 | 17 | 20 | 12 | 205 | 206 | 197 | 47  | 101 | 69  |
| SMMPA13614 | 15 | 10 | 11 | 29  | 33  | 22  | 11  | 17  | 20  |
| SMMPA13615 | 3  | 8  | 2  | 22  | 32  | 22  | 11  | 4   | 16  |

|            |    |    |    |     |     |     |    |     |     |
|------------|----|----|----|-----|-----|-----|----|-----|-----|
| SMMPA13616 | 7  | 3  | 4  | 7   | 6   | 7   | 10 | 4   | 5   |
| SMMPA13617 | 7  | 13 | 14 | 79  | 81  | 68  | 29 | 70  | 64  |
| SMMPA13618 | 5  | 7  | 2  | 20  | 12  | 17  | 5  | 8   | 7   |
| SMMPA13619 | 2  | 6  | 1  | 8   | 7   | 7   | 5  | 10  | 4   |
| SMMPA13620 | 2  | 2  | 4  | 30  | 20  | 25  | 6  | 8   | 5   |
| SMMPA13621 | 17 | 11 | 13 | 95  | 70  | 59  | 51 | 56  | 65  |
| SMMPA13622 | 17 | 13 | 17 | 52  | 63  | 46  | 41 | 51  | 59  |
| SMMPA13623 | 22 | 22 | 15 | 88  | 60  | 56  | 42 | 46  | 39  |
| SMMPA13624 | 22 | 29 | 18 | 89  | 93  | 69  | 44 | 55  | 55  |
| SMMPA13625 | 12 | 16 | 2  | 26  | 18  | 17  | 11 | 17  | 21  |
| SMMPA13626 | 23 | 25 | 21 | 118 | 137 | 84  | 56 | 77  | 53  |
| SMMPA13627 | 1  | 5  | 3  | 7   | 8   | 8   | 11 | 8   | 13  |
| SMMPA13628 | 18 | 14 | 12 | 68  | 68  | 38  | 35 | 45  | 45  |
| SMMPA13629 | 12 | 10 | 11 | 26  | 33  | 27  | 17 | 19  | 13  |
| SMMPA13630 | 20 | 18 | 11 | 30  | 30  | 27  | 20 | 45  | 31  |
| SMMPA13631 | 10 | 12 | 10 | 23  | 28  | 16  | 15 | 25  | 14  |
| SMMPA13632 | 5  | 3  | 7  | 6   | 5   | 2   | 3  | 8   | 10  |
| SMMPA13633 | 9  | 11 | 9  | 17  | 13  | 10  | 9  | 19  | 8   |
| SMMPA13634 | 25 | 22 | 19 | 40  | 37  | 35  | 38 | 34  | 33  |
| SMMPA13635 | 30 | 27 | 35 | 82  | 68  | 48  | 52 | 49  | 55  |
| SMMPA13636 | 37 | 36 | 38 | 131 | 103 | 107 | 64 | 65  | 65  |
| SMMPA13637 | 7  | 11 | 11 | 12  | 11  | 5   | 4  | 8   | 9   |
| SMMPA13638 | 21 | 24 | 29 | 43  | 26  | 25  | 38 | 38  | 40  |
| SMMPA13639 | 18 | 15 | 18 | 15  | 22  | 12  | 10 | 23  | 20  |
| SMMPA13640 | 14 | 17 | 13 | 9   | 16  | 22  | 15 | 10  | 17  |
| SMMPA13641 | 21 | 22 | 26 | 35  | 39  | 33  | 29 | 31  | 30  |
| SMMPA13642 | 23 | 14 | 19 | 22  | 15  | 22  | 15 | 20  | 25  |
| SMMPA13643 | 37 | 29 | 29 | 48  | 50  | 40  | 35 | 60  | 41  |
| SMMPA13644 | 7  | 7  | 12 | 14  | 9   | 8   | 9  | 16  | 11  |
| SMMPA13645 | 15 | 22 | 19 | 16  | 25  | 13  | 22 | 12  | 26  |
| SMMPA13646 | 37 | 46 | 33 | 46  | 66  | 43  | 55 | 57  | 44  |
| SMMPA13647 | 3  | 9  | 2  | 71  | 50  | 59  | 36 | 56  | 48  |
| SMMPA13648 | 58 | 70 | 52 | 135 | 119 | 99  | 78 | 132 | 88  |
| SMMPA13649 | 7  | 10 | 9  | 163 | 188 | 126 | 79 | 124 | 109 |
| SMMPA13650 | 24 | 18 | 15 | 55  | 43  | 46  | 33 | 39  | 46  |
| SMMPA13651 | 11 | 9  | 10 | 39  | 24  | 22  | 15 | 22  | 24  |
| SMMPA13652 | 19 | 21 | 17 | 38  | 23  | 34  | 32 | 29  | 26  |
| SMMPA13653 | 22 | 29 | 26 | 54  | 51  | 47  | 24 | 35  | 47  |
| SMMPA13654 | 13 | 19 | 17 | 24  | 21  | 25  | 16 | 18  | 20  |
| SMMPA13655 | 40 | 30 | 24 | 166 | 142 | 99  | 54 | 87  | 56  |
| SMMPA13656 | 16 | 32 | 32 | 174 | 152 | 109 | 84 | 124 | 110 |

|            |    |    |    |     |     |     |     |     |     |
|------------|----|----|----|-----|-----|-----|-----|-----|-----|
| SMMPA13657 | 15 | 33 | 22 | 445 | 466 | 343 | 147 | 228 | 194 |
| SMMPA13658 | 13 | 15 | 11 | 69  | 62  | 41  | 33  | 27  | 40  |
| SMMPA13659 | 20 | 14 | 13 | 81  | 75  | 57  | 31  | 43  | 46  |
| SMMPA13660 | 11 | 12 | 8  | 42  | 32  | 21  | 26  | 31  | 34  |
| SMMPA13661 | 28 | 30 | 24 | 55  | 37  | 30  | 32  | 53  | 44  |
| SMMPA13662 | 34 | 41 | 41 | 24  | 28  | 22  | 22  | 40  | 38  |
| SMMPA13663 | 8  | 9  | 7  | 59  | 50  | 35  | 28  | 38  | 33  |
| SMMPA13664 | 11 | 10 | 6  | 42  | 62  | 46  | 35  | 37  | 44  |
| SMMPA13665 | 18 | 20 | 21 | 133 | 97  | 79  | 59  | 100 | 99  |
| SMMPA13666 | 22 | 26 | 20 | 40  | 40  | 42  | 39  | 46  | 39  |
| SMMPA13667 | 23 | 25 | 25 | 210 | 183 | 126 | 88  | 137 | 146 |
| SMMPA13668 | 9  | 6  | 14 | 31  | 30  | 46  | 11  | 7   | 7   |
| SMMPA13669 | 19 | 21 | 20 | 35  | 34  | 30  | 23  | 33  | 22  |
| SMMPA13670 | 40 | 25 | 31 | 158 | 161 | 114 | 85  | 94  | 82  |
| SMMPA13671 | 18 | 10 | 9  | 46  | 46  | 45  | 23  | 20  | 19  |
| SMMPA13672 | 14 | 16 | 11 | 115 | 115 | 91  | 42  | 70  | 54  |
| SMMPA13673 | 17 | 9  | 9  | 48  | 38  | 30  | 30  | 40  | 32  |
| SMMPA13674 | 20 | 19 | 15 | 36  | 20  | 23  | 27  | 22  | 32  |
| SMMPA13675 | 12 | 11 | 14 | 27  | 30  | 16  | 21  | 29  | 34  |
| SMMPA13676 | 17 | 20 | 12 | 60  | 40  | 40  | 29  | 34  | 44  |
| SMMPA13677 | 16 | 17 | 14 | 11  | 29  | 20  | 13  | 23  | 13  |
| SMMPA13678 | 9  | 7  | 14 | 10  | 11  | 15  | 6   | 10  | 11  |
| SMMPA13679 | 21 | 22 | 25 | 81  | 45  | 40  | 38  | 40  | 41  |
| SMMPA13680 | 4  | 8  | 6  | 17  | 12  | 14  | 11  | 13  | 13  |
| SMMPA13681 | 19 | 9  | 9  | 32  | 25  | 19  | 36  | 36  | 38  |
| SMMPA13682 | 25 | 21 | 16 | 36  | 34  | 39  | 30  | 26  | 30  |
| SMMPA13683 | 27 | 9  | 18 | 36  | 26  | 17  | 22  | 27  | 29  |
| SMMPA13684 | 14 | 13 | 10 | 22  | 27  | 16  | 12  | 25  | 24  |
| SMMPA13685 | 14 | 5  | 14 | 27  | 20  | 25  | 14  | 29  | 25  |
| SMMPA13686 | 12 | 18 | 8  | 24  | 17  | 26  | 19  | 23  | 21  |
| SMMPA13687 | 9  | 11 | 9  | 18  | 21  | 8   | 8   | 20  | 15  |
| SMMPA13688 | 21 | 16 | 18 | 154 | 126 | 107 | 56  | 69  | 74  |
| SMMPA13689 | 12 | 17 | 11 | 44  | 37  | 40  | 21  | 26  | 24  |
| SMMPA13690 | 15 | 24 | 24 | 39  | 43  | 37  | 30  | 34  | 32  |
| SMMPA13691 | 5  | 8  | 7  | 6   | 9   | 2   | 9   | 8   | 16  |
| SMMPA13692 | 31 | 35 | 12 | 159 | 163 | 127 | 68  | 73  | 76  |
| SMMPA13693 | 42 | 53 | 32 | 130 | 104 | 104 | 56  | 75  | 66  |
| SMMPA13694 | 24 | 31 | 20 | 933 | 904 | 851 | 309 | 456 | 415 |
| SMMPA13695 | 19 | 23 | 7  | 83  | 74  | 52  | 43  | 56  | 34  |
| SMMPA13696 | 27 | 38 | 28 | 68  | 58  | 41  | 49  | 56  | 59  |
| SMMPA13697 | 57 | 62 | 53 | 160 | 165 | 129 | 72  | 106 | 84  |

|            |    |    |    |      |     |      |     |     |     |
|------------|----|----|----|------|-----|------|-----|-----|-----|
| SMMPA13698 | 24 | 23 | 16 | 36   | 30  | 31   | 30  | 27  | 28  |
| SMMPA13699 | 25 | 34 | 28 | 548  | 512 | 381  | 151 | 234 | 220 |
| SMMPA13700 | 23 | 29 | 16 | 58   | 56  | 34   | 28  | 50  | 40  |
| SMMPA13701 | 60 | 49 | 37 | 359  | 334 | 251  | 112 | 142 | 112 |
| SMMPA13702 | 24 | 37 | 26 | 36   | 61  | 42   | 34  | 47  | 51  |
| SMMPA13703 | 20 | 26 | 26 | 22   | 32  | 35   | 35  | 26  | 33  |
| SMMPA13704 | 15 | 24 | 23 | 48   | 39  | 44   | 24  | 31  | 26  |
| SMMPA13705 | 8  | 8  | 6  | 7    | 5   | 2    | 7   | 7   | 4   |
| SMMPA13706 | 17 | 22 | 17 | 114  | 124 | 85   | 44  | 59  | 58  |
| SMMPA13707 | 10 | 12 | 11 | 53   | 57  | 37   | 28  | 40  | 29  |
| SMMPA13708 | 11 | 18 | 6  | 143  | 125 | 99   | 64  | 75  | 49  |
| SMMPA13709 | 10 | 23 | 20 | 174  | 138 | 121  | 84  | 121 | 92  |
| SMMPA13710 | 17 | 21 | 31 | 38   | 32  | 38   | 28  | 29  | 35  |
| SMMPA13711 | 33 | 24 | 22 | 64   | 42  | 40   | 56  | 55  | 54  |
| SMMPA13712 | 22 | 21 | 31 | 156  | 141 | 118  | 49  | 67  | 57  |
| SMMPA13713 | 6  | 10 | 7  | 27   | 35  | 31   | 16  | 27  | 13  |
| SMMPA13714 | 12 | 12 | 9  | 25   | 18  | 30   | 10  | 13  | 18  |
| SMMPA13715 | 19 | 15 | 11 | 35   | 18  | 20   | 31  | 26  | 27  |
| SMMPA13716 | 38 | 32 | 25 | 28   | 32  | 36   | 23  | 31  | 29  |
| SMMPA13717 | 12 | 12 | 14 | 17   | 10  | 11   | 7   | 11  | 11  |
| SMMPA13718 | 32 | 31 | 35 | 37   | 40  | 41   | 38  | 41  | 43  |
| SMMPA13719 | 13 | 15 | 11 | 14   | 17  | 15   | 10  | 19  | 12  |
| SMMPA13720 | 7  | 5  | 11 | 22   | 42  | 26   | 9   | 17  | 12  |
| SMMPA13721 | 18 | 19 | 15 | 32   | 34  | 36   | 17  | 35  | 26  |
| SMMPA13722 | 10 | 12 | 5  | 32   | 53  | 37   | 22  | 22  | 22  |
| SMMPA13723 | 11 | 13 | 14 | 49   | 50  | 33   | 50  | 46  | 41  |
| SMMPA13724 | 3  | 7  | 5  | 10   | 5   | 2    | 5   | 4   | 8   |
| SMMPA13725 | 17 | 16 | 19 | 14   | 15  | 17   | 18  | 31  | 27  |
| SMMPA13726 | 16 | 13 | 12 | 40   | 34  | 27   | 28  | 28  | 33  |
| SMMPA13727 | 28 | 35 | 18 | 84   | 65  | 42   | 48  | 89  | 78  |
| SMMPA13728 | 34 | 28 | 34 | 62   | 40  | 51   | 49  | 62  | 45  |
| SMMPA13729 | 14 | 20 | 11 | 22   | 19  | 32   | 17  | 31  | 30  |
| SMMPA13730 | 17 | 18 | 14 | 28   | 19  | 18   | 19  | 26  | 30  |
| SMMPA13731 | 19 | 12 | 8  | 28   | 13  | 19   | 17  | 16  | 18  |
| SMMPA13732 | 50 | 48 | 28 | 48   | 41  | 44   | 67  | 58  | 58  |
| SMMPA13733 | 35 | 30 | 20 | 45   | 65  | 41   | 37  | 44  | 55  |
| SMMPA13734 | 25 | 30 | 14 | 64   | 46  | 51   | 46  | 54  | 51  |
| SMMPA13735 | 30 | 23 | 33 | 1044 | 995 | 1022 | 592 | 810 | 693 |
| SMMPA13736 | 15 | 24 | 34 | 790  | 708 | 665  | 539 | 722 | 650 |
| SMMPA13737 | 15 | 19 | 15 | 458  | 371 | 387  | 334 | 410 | 413 |
| SMMPA13738 | 18 | 12 | 20 | 536  | 536 | 518  | 362 | 496 | 434 |



|            |    |    |    |     |     |     |     |     |     |
|------------|----|----|----|-----|-----|-----|-----|-----|-----|
| SMMPA13739 | 22 | 24 | 20 | 650 | 561 | 503 | 375 | 452 | 411 |
| SMMPA13740 | 27 | 28 | 23 | 500 | 510 | 458 | 262 | 318 | 304 |
| SMMPA13741 | 17 | 24 | 25 | 916 | 867 | 807 | 605 | 860 | 697 |
| SMMPA13742 | 46 | 34 | 34 | 57  | 62  | 42  | 64  | 76  | 53  |
| SMMPA13743 | 17 | 20 | 15 | 96  | 86  | 63  | 65  | 70  | 91  |
| SMMPA13744 | 10 | 2  | 3  | 13  | 10  | 3   | 14  | 12  | 12  |
| SMMPA13745 | 19 | 23 | 21 | 177 | 180 | 130 | 107 | 145 | 126 |
| SMMPA13746 | 22 | 24 | 26 | 195 | 152 | 159 | 149 | 197 | 194 |
| SMMPA13747 | 18 | 17 | 16 | 51  | 60  | 45  | 49  | 96  | 86  |
| SMMPA13748 | 34 | 26 | 28 | 122 | 107 | 92  | 108 | 134 | 129 |
| SMMPA13749 | 17 | 12 | 11 | 57  | 71  | 50  | 70  | 69  | 65  |
| SMMPA13750 | 13 | 22 | 20 | 89  | 89  | 48  | 59  | 81  | 80  |
| SMMPA13751 | 30 | 31 | 19 | 360 | 320 | 243 | 214 | 308 | 283 |
| SMMPA13752 | 15 | 24 | 14 | 77  | 68  | 55  | 63  | 84  | 72  |
| SMMPA13753 | 27 | 19 | 19 | 138 | 127 | 82  | 61  | 91  | 79  |
| SMMPA13754 | 15 | 9  | 13 | 38  | 38  | 28  | 50  | 61  | 54  |
| SMMPA13755 | 19 | 13 | 13 | 10  | 14  | 15  | 10  | 16  | 10  |
| SMMPA13756 | 19 | 10 | 18 | 12  | 4   | 8   | 7   | 6   | 6   |
| SMMPA13757 | 19 | 9  | 10 | 43  | 38  | 29  | 17  | 15  | 18  |
| SMMPA13758 | 29 | 39 | 24 | 53  | 59  | 42  | 28  | 34  | 36  |
| SMMPA13759 | 16 | 22 | 10 | 80  | 99  | 88  | 34  | 38  | 33  |
| SMMPA13760 | 28 | 24 | 11 | 65  | 54  | 52  | 25  | 34  | 34  |
| SMMPA13761 | 31 | 37 | 37 | 48  | 44  | 34  | 25  | 34  | 30  |
| SMMPA13762 | 20 | 14 | 17 | 27  | 29  | 16  | 22  | 29  | 33  |
| SMMPA13763 | 19 | 11 | 15 | 44  | 52  | 42  | 23  | 26  | 25  |
| SMMPA13764 | 6  | 10 | 7  | 7   | 9   | 8   | 7   | 9   | 10  |
| SMMPA13765 | 22 | 28 | 16 | 27  | 25  | 32  | 38  | 54  | 56  |
| SMMPA13766 | 30 | 28 | 27 | 61  | 61  | 48  | 37  | 65  | 63  |
| SMMPA13767 | 17 | 17 | 28 | 139 | 124 | 91  | 72  | 98  | 80  |
| SMMPA13768 | 32 | 34 | 35 | 82  | 85  | 63  | 53  | 63  | 64  |
| SMMPA13769 | 11 | 10 | 3  | 5   | 2   | 5   | 9   | 15  | 6   |
| SMMPA13770 | 8  | 8  | 5  | 17  | 12  | 21  | 5   | 9   | 10  |
| SMMPA13771 | 27 | 31 | 24 | 34  | 29  | 24  | 38  | 41  | 51  |
| SMMPA13772 | 16 | 21 | 21 | 21  | 28  | 21  | 27  | 28  | 27  |
| SMMPA13773 | 18 | 26 | 17 | 41  | 58  | 43  | 26  | 30  | 28  |
| SMMPA13774 | 20 | 17 | 22 | 14  | 18  | 12  | 17  | 18  | 28  |
| SMMPA13775 | 15 | 4  | 5  | 12  | 10  | 6   | 15  | 13  | 15  |
| SMMPA13776 | 13 | 15 | 19 | 32  | 31  | 16  | 26  | 25  | 19  |
| SMMPA13777 | 23 | 16 | 15 | 31  | 32  | 34  | 19  | 28  | 23  |
| SMMPA13778 | 37 | 43 | 33 | 21  | 17  | 18  | 32  | 25  | 43  |
| SMMPA13779 | 38 | 52 | 42 | 32  | 25  | 14  | 37  | 48  | 52  |

|            |    |     |    |      |      |     |     |     |     |
|------------|----|-----|----|------|------|-----|-----|-----|-----|
| SMMPA13780 | 23 | 25  | 31 | 37   | 29   | 27  | 29  | 32  | 41  |
| SMMPA13781 | 2  | 0   | 1  | 0    | 3    | 3   | 3   | 0   | 4   |
| SMMPA13782 | 44 | 44  | 37 | 60   | 45   | 42  | 51  | 63  | 66  |
| SMMPA13783 | 19 | 19  | 15 | 35   | 37   | 31  | 32  | 40  | 35  |
| SMMPA13784 | 6  | 11  | 16 | 6    | 8    | 14  | 10  | 15  | 16  |
| SMMPA13785 | 17 | 19  | 12 | 8    | 16   | 10  | 13  | 10  | 14  |
| SMMPA13786 | 16 | 22  | 12 | 27   | 22   | 18  | 21  | 15  | 19  |
| SMMPA13787 | 9  | 6   | 4  | 8    | 1    | 7   | 5   | 15  | 8   |
| SMMPA13788 | 8  | 7   | 3  | 32   | 24   | 26  | 22  | 22  | 25  |
| SMMPA13789 | 7  | 15  | 11 | 20   | 31   | 20  | 18  | 23  | 14  |
| SMMPA13790 | 13 | 20  | 12 | 35   | 34   | 25  | 41  | 41  | 51  |
| SMMPA13791 | 39 | 33  | 26 | 123  | 106  | 96  | 54  | 90  | 75  |
| SMMPA13792 | 26 | 22  | 30 | 65   | 55   | 58  | 56  | 54  | 77  |
| SMMPA13793 | 14 | 22  | 11 | 249  | 241  | 199 | 135 | 161 | 172 |
| SMMPA13794 | 14 | 14  | 11 | 54   | 33   | 44  | 36  | 49  | 44  |
| SMMPA13795 | 14 | 14  | 10 | 137  | 111  | 97  | 76  | 82  | 60  |
| SMMPA13796 | 29 | 43  | 42 | 103  | 98   | 73  | 56  | 91  | 82  |
| SMMPA13797 | 31 | 36  | 34 | 201  | 173  | 166 | 88  | 120 | 119 |
| SMMPA13798 | 27 | 30  | 21 | 181  | 129  | 121 | 68  | 61  | 65  |
| SMMPA13799 | 41 | 36  | 51 | 68   | 56   | 60  | 33  | 57  | 43  |
| SMMPA13800 | 28 | 19  | 19 | 23   | 27   | 20  | 20  | 37  | 29  |
| SMMPA13801 | 32 | 31  | 20 | 35   | 29   | 31  | 8   | 21  | 21  |
| SMMPA13802 | 18 | 13  | 23 | 54   | 37   | 33  | 23  | 30  | 22  |
| SMMPA13803 | 65 | 66  | 61 | 302  | 251  | 203 | 139 | 155 | 142 |
| SMMPA13804 | 31 | 22  | 23 | 123  | 106  | 67  | 62  | 68  | 78  |
| SMMPA13805 | 17 | 23  | 14 | 62   | 56   | 49  | 36  | 39  | 43  |
| SMMPA13806 | 19 | 30  | 20 | 31   | 30   | 30  | 33  | 30  | 33  |
| SMMPA13807 | 20 | 13  | 8  | 77   | 58   | 45  | 34  | 43  | 35  |
| SMMPA13808 | 16 | 15  | 13 | 52   | 61   | 39  | 20  | 28  | 23  |
| SMMPA13809 | 23 | 14  | 14 | 218  | 157  | 137 | 81  | 98  | 90  |
| SMMPA13810 | 7  | 8   | 16 | 102  | 103  | 107 | 30  | 40  | 35  |
| SMMPA13811 | 11 | 11  | 6  | 31   | 32   | 31  | 8   | 20  | 12  |
| SMMPA13812 | 24 | 29  | 32 | 138  | 120  | 124 | 68  | 86  | 83  |
| SMMPA13813 | 31 | 29  | 28 | 65   | 52   | 50  | 62  | 60  | 70  |
| SMMPA13814 | 32 | 35  | 25 | 168  | 167  | 132 | 85  | 113 | 107 |
| SMMPA13815 | 12 | 13  | 12 | 30   | 23   | 23  | 29  | 23  | 34  |
| SMMPA13816 | 22 | 11  | 16 | 77   | 68   | 45  | 39  | 43  | 42  |
| SMMPA13817 | 35 | 44  | 29 | 1065 | 1027 | 933 | 594 | 768 | 663 |
| SMMPA13818 | 94 | 109 | 80 | 391  | 432  | 316 | 186 | 208 | 217 |
| SMMPA13819 | 13 | 16  | 17 | 259  | 215  | 200 | 113 | 158 | 131 |
| SMMPA13820 | 23 | 19  | 19 | 100  | 82   | 71  | 56  | 82  | 88  |

|            |    |    |    |     |     |     |     |     |     |
|------------|----|----|----|-----|-----|-----|-----|-----|-----|
| SMMPA13821 | 7  | 12 | 6  | 12  | 17  | 16  | 6   | 7   | 7   |
| SMMPA13822 | 3  | 2  | 4  | 16  | 11  | 4   | 5   | 4   | 1   |
| SMMPA13823 | 9  | 30 | 17 | 34  | 45  | 30  | 28  | 32  | 27  |
| SMMPA13824 | 6  | 6  | 7  | 3   | 6   | 3   | 7   | 5   | 7   |
| SMMPA13825 | 7  | 11 | 4  | 11  | 5   | 16  | 8   | 10  | 15  |
| SMMPA13826 | 30 | 31 | 30 | 36  | 45  | 29  | 29  | 39  | 56  |
| SMMPA13827 | 22 | 22 | 36 | 794 | 729 | 602 | 526 | 731 | 633 |
| SMMPA13828 | 15 | 18 | 20 | 30  | 30  | 24  | 26  | 32  | 48  |
| SMMPA13829 | 31 | 42 | 28 | 70  | 58  | 50  | 59  | 67  | 72  |
| SMMPA13830 | 20 | 34 | 29 | 67  | 68  | 56  | 49  | 66  | 54  |
| SMMPA13831 | 25 | 38 | 23 | 60  | 68  | 33  | 50  | 69  | 71  |
| SMMPA13832 | 21 | 23 | 20 | 47  | 45  | 34  | 44  | 51  | 56  |
| SMMPA13833 | 48 | 36 | 39 | 71  | 68  | 57  | 43  | 58  | 60  |
| SMMPA13834 | 24 | 26 | 20 | 50  | 64  | 47  | 39  | 54  | 52  |
| SMMPA13835 | 9  | 9  | 8  | 8   | 6   | 8   | 10  | 15  | 15  |
| SMMPA13836 | 15 | 11 | 6  | 8   | 7   | 10  | 2   | 8   | 6   |
| SMMPA13837 | 31 | 28 | 28 | 50  | 48  | 48  | 53  | 53  | 41  |
| SMMPA13838 | 27 | 17 | 28 | 49  | 66  | 51  | 44  | 58  | 41  |
| SMMPA13839 | 0  | 0  | 0  | 0   | 0   | 0   | 1   | 2   | 2   |
| SMMPA13840 | 21 | 15 | 8  | 24  | 21  | 22  | 19  | 36  | 23  |
| SMMPA13841 | 16 | 20 | 20 | 28  | 31  | 31  | 31  | 28  | 36  |
| SMMPA13842 | 19 | 26 | 30 | 43  | 36  | 34  | 26  | 27  | 45  |
| SMMPA13843 | 12 | 23 | 26 | 29  | 22  | 33  | 23  | 53  | 39  |
| SMMPA13844 | 13 | 18 | 17 | 45  | 34  | 24  | 37  | 38  | 30  |
| SMMPA13845 | 10 | 17 | 19 | 44  | 23  | 27  | 17  | 20  | 23  |
| SMMPA13846 | 30 | 19 | 19 | 169 | 154 | 100 | 75  | 102 | 90  |
| SMMPA13847 | 26 | 20 | 18 | 41  | 42  | 34  | 25  | 33  | 41  |
| SMMPA13848 | 36 | 27 | 28 | 59  | 46  | 34  | 29  | 36  | 40  |
| SMMPA13849 | 25 | 32 | 16 | 58  | 52  | 53  | 34  | 50  | 41  |
| SMMPA13850 | 22 | 25 | 20 | 24  | 22  | 21  | 11  | 41  | 32  |
| SMMPA13851 | 21 | 26 | 20 | 33  | 26  | 27  | 32  | 30  | 31  |
| SMMPA13852 | 17 | 21 | 13 | 23  | 21  | 16  | 21  | 24  | 28  |
| SMMPA13853 | 21 | 16 | 18 | 236 | 257 | 189 | 127 | 120 | 138 |
| SMMPA13854 | 26 | 14 | 16 | 145 | 121 | 85  | 73  | 69  | 79  |
| SMMPA13855 | 27 | 17 | 18 | 48  | 29  | 23  | 28  | 32  | 36  |
| SMMPA13856 | 9  | 6  | 12 | 61  | 40  | 27  | 30  | 47  | 37  |
| SMMPA13857 | 13 | 18 | 13 | 202 | 176 | 110 | 67  | 105 | 71  |
| SMMPA13858 | 17 | 24 | 27 | 130 | 148 | 103 | 57  | 87  | 69  |
| SMMPA13859 | 12 | 18 | 10 | 123 | 120 | 75  | 56  | 74  | 69  |
| SMMPA13860 | 20 | 29 | 21 | 143 | 126 | 117 | 54  | 75  | 60  |
| SMMPA13861 | 28 | 33 | 21 | 200 | 180 | 121 | 121 | 110 | 116 |

|            |    |    |    |     |     |     |     |     |     |
|------------|----|----|----|-----|-----|-----|-----|-----|-----|
| SMMPA13862 | 16 | 20 | 16 | 94  | 83  | 68  | 43  | 53  | 54  |
| SMMPA13863 | 15 | 15 | 18 | 43  | 45  | 48  | 26  | 38  | 38  |
| SMMPA13864 | 16 | 14 | 18 | 56  | 60  | 41  | 48  | 55  | 42  |
| SMMPA13865 | 23 | 21 | 16 | 37  | 41  | 31  | 26  | 25  | 25  |
| SMMPA13866 | 4  | 9  | 9  | 47  | 46  | 39  | 27  | 26  | 29  |
| SMMPA13867 | 8  | 7  | 5  | 45  | 54  | 37  | 35  | 38  | 30  |
| SMMPA13868 | 15 | 17 | 15 | 87  | 70  | 49  | 84  | 150 | 104 |
| SMMPA13869 | 44 | 48 | 38 | 196 | 192 | 152 | 88  | 124 | 105 |
| SMMPA13870 | 25 | 21 | 19 | 76  | 74  | 70  | 57  | 76  | 60  |
| SMMPA13871 | 25 | 34 | 21 | 51  | 31  | 37  | 23  | 29  | 25  |
| SMMPA13872 | 14 | 14 | 15 | 19  | 12  | 9   | 11  | 20  | 16  |
| SMMPA13873 | 10 | 8  | 18 | 14  | 10  | 10  | 4   | 8   | 12  |
| SMMPA13874 | 15 | 13 | 8  | 16  | 18  | 21  | 20  | 26  | 22  |
| SMMPA13875 | 15 | 11 | 11 | 11  | 5   | 7   | 8   | 8   | 13  |
| SMMPA13876 | 3  | 1  | 3  | 4   | 1   | 2   | 1   | 0   | 4   |
| SMMPA13877 | 23 | 34 | 24 | 49  | 57  | 27  | 36  | 38  | 38  |
| SMMPA13878 | 5  | 3  | 10 | 3   | 3   | 9   | 6   | 8   | 3   |
| SMMPA13879 | 15 | 17 | 12 | 12  | 5   | 18  | 15  | 18  | 16  |
| SMMPA13880 | 16 | 16 | 17 | 43  | 35  | 27  | 29  | 37  | 31  |
| SMMPA13881 | 23 | 19 | 21 | 60  | 47  | 41  | 24  | 42  | 38  |
| SMMPA13882 | 9  | 13 | 15 | 16  | 15  | 14  | 16  | 13  | 21  |
| SMMPA13883 | 14 | 11 | 15 | 22  | 30  | 26  | 26  | 36  | 33  |
| SMMPA13884 | 23 | 20 | 21 | 150 | 127 | 85  | 47  | 91  | 90  |
| SMMPA13885 | 13 | 16 | 12 | 28  | 25  | 18  | 28  | 29  | 27  |
| SMMPA13886 | 18 | 26 | 11 | 48  | 37  | 30  | 28  | 38  | 35  |
| SMMPA13887 | 20 | 36 | 23 | 131 | 124 | 86  | 62  | 68  | 90  |
| SMMPA13888 | 19 | 17 | 16 | 120 | 91  | 87  | 59  | 76  | 81  |
| SMMPA13889 | 20 | 14 | 12 | 22  | 21  | 17  | 20  | 25  | 23  |
| SMMPA13890 | 8  | 11 | 14 | 27  | 21  | 23  | 18  | 20  | 16  |
| SMMPA13891 | 34 | 33 | 28 | 67  | 56  | 57  | 46  | 56  | 50  |
| SMMPA13892 | 28 | 30 | 27 | 99  | 82  | 85  | 44  | 61  | 54  |
| SMMPA13893 | 14 | 14 | 15 | 78  | 72  | 58  | 40  | 48  | 35  |
| SMMPA13894 | 26 | 27 | 15 | 225 | 189 | 191 | 139 | 145 | 137 |
| SMMPA13895 | 21 | 15 | 21 | 66  | 58  | 44  | 30  | 44  | 33  |
| SMMPA13896 | 50 | 38 | 27 | 76  | 71  | 49  | 63  | 72  | 76  |
| SMMPA13897 | 11 | 8  | 10 | 11  | 12  | 11  | 17  | 10  | 27  |
| SMMPA13898 | 3  | 5  | 6  | 6   | 5   | 7   | 10  | 4   | 5   |
| SMMPA13899 | 12 | 10 | 5  | 9   | 12  | 8   | 7   | 15  | 11  |
| SMMPA13900 | 12 | 13 | 12 | 64  | 71  | 47  | 40  | 53  | 35  |
| SMMPA13901 | 49 | 67 | 45 | 55  | 42  | 47  | 55  | 57  | 72  |
| SMMPA13902 | 37 | 57 | 44 | 42  | 39  | 44  | 39  | 56  | 55  |

|            |    |    |    |     |     |     |     |     |     |
|------------|----|----|----|-----|-----|-----|-----|-----|-----|
| SMMPA13903 | 24 | 20 | 20 | 46  | 43  | 31  | 31  | 44  | 57  |
| SMMPA13904 | 17 | 17 | 17 | 34  | 46  | 25  | 26  | 27  | 25  |
| SMMPA13905 | 26 | 31 | 16 | 79  | 78  | 79  | 38  | 50  | 54  |
| SMMPA13906 | 33 | 28 | 33 | 63  | 49  | 50  | 37  | 56  | 40  |
| SMMPA13907 | 20 | 23 | 19 | 32  | 23  | 28  | 15  | 32  | 25  |
| SMMPA13908 | 29 | 34 | 39 | 91  | 100 | 68  | 48  | 51  | 68  |
| SMMPA13909 | 15 | 18 | 14 | 38  | 40  | 34  | 19  | 27  | 31  |
| SMMPA13910 | 25 | 18 | 15 | 64  | 73  | 54  | 27  | 37  | 46  |
| SMMPA13911 | 28 | 26 | 27 | 75  | 77  | 52  | 53  | 74  | 56  |
| SMMPA13912 | 17 | 6  | 9  | 26  | 31  | 18  | 10  | 23  | 20  |
| SMMPA13913 | 10 | 16 | 18 | 21  | 12  | 21  | 15  | 29  | 27  |
| SMMPA13914 | 16 | 13 | 17 | 21  | 20  | 16  | 19  | 34  | 26  |
| SMMPA13915 | 23 | 11 | 18 | 223 | 246 | 177 | 103 | 168 | 132 |
| SMMPA13916 | 24 | 32 | 32 | 153 | 169 | 142 | 88  | 119 | 107 |
| SMMPA13917 | 33 | 20 | 28 | 113 | 99  | 101 | 47  | 58  | 53  |
| SMMPA13918 | 27 | 28 | 32 | 79  | 47  | 55  | 38  | 59  | 54  |
| SMMPA13919 | 33 | 31 | 25 | 51  | 66  | 48  | 27  | 48  | 45  |
| SMMPA13920 | 11 | 18 | 15 | 86  | 85  | 49  | 52  | 75  | 37  |
| SMMPA13921 | 18 | 15 | 9  | 55  | 54  | 42  | 35  | 49  | 49  |
| SMMPA13922 | 11 | 17 | 18 | 365 | 336 | 274 | 154 | 162 | 129 |
| SMMPA13923 | 12 | 17 | 13 | 95  | 68  | 74  | 40  | 49  | 43  |
| SMMPA13924 | 17 | 20 | 18 | 198 | 141 | 154 | 91  | 92  | 99  |
| SMMPA13925 | 11 | 8  | 10 | 24  | 19  | 17  | 19  | 28  | 22  |
| SMMPA13926 | 25 | 28 | 15 | 137 | 113 | 97  | 62  | 113 | 90  |
| SMMPA13927 | 22 | 21 | 21 | 51  | 52  | 51  | 27  | 28  | 33  |
| SMMPA13928 | 41 | 15 | 22 | 90  | 112 | 78  | 61  | 74  | 80  |
| SMMPA13929 | 52 | 46 | 46 | 44  | 41  | 48  | 45  | 62  | 47  |
| SMMPA13930 | 13 | 20 | 11 | 43  | 41  | 37  | 26  | 45  | 38  |
| SMMPA13931 | 15 | 16 | 18 | 42  | 29  | 28  | 28  | 34  | 26  |
| SMMPA13932 | 17 | 22 | 16 | 50  | 35  | 32  | 22  | 43  | 25  |
| SMMPA13933 | 11 | 9  | 15 | 18  | 25  | 17  | 15  | 21  | 25  |
| SMMPA13934 | 14 | 10 | 8  | 21  | 21  | 18  | 13  | 18  | 20  |
| SMMPA13935 | 19 | 15 | 13 | 62  | 42  | 30  | 29  | 39  | 42  |
| SMMPA13936 | 20 | 37 | 24 | 244 | 229 | 163 | 117 | 153 | 149 |
| SMMPA13937 | 14 | 15 | 8  | 292 | 307 | 210 | 127 | 192 | 138 |
| SMMPA13938 | 12 | 14 | 12 | 36  | 37  | 20  | 17  | 20  | 21  |
| SMMPA13939 | 27 | 19 | 27 | 185 | 174 | 131 | 64  | 98  | 78  |
| SMMPA13940 | 20 | 16 | 21 | 41  | 44  | 41  | 33  | 44  | 37  |
| SMMPA13941 | 11 | 14 | 8  | 20  | 22  | 10  | 25  | 20  | 27  |
| SMMPA13942 | 2  | 7  | 10 | 19  | 12  | 14  | 10  | 10  | 14  |
| SMMPA13943 | 7  | 9  | 6  | 8   | 11  | 9   | 6   | 16  | 15  |

|            |     |     |    |     |     |     |     |     |     |
|------------|-----|-----|----|-----|-----|-----|-----|-----|-----|
| SMMPA13944 | 23  | 21  | 22 | 34  | 28  | 28  | 27  | 45  | 37  |
| SMMPA13945 | 23  | 29  | 22 | 241 | 222 | 153 | 110 | 152 | 125 |
| SMMPA13946 | 16  | 14  | 16 | 15  | 20  | 30  | 20  | 24  | 26  |
| SMMPA13947 | 23  | 19  | 21 | 51  | 40  | 48  | 25  | 35  | 36  |
| SMMPA13948 | 14  | 10  | 11 | 27  | 28  | 17  | 21  | 27  | 38  |
| SMMPA13949 | 6   | 9   | 3  | 28  | 28  | 25  | 38  | 37  | 30  |
| SMMPA13950 | 17  | 26  | 20 | 122 | 129 | 100 | 67  | 88  | 90  |
| SMMPA13951 | 19  | 20  | 21 | 87  | 90  | 64  | 47  | 60  | 60  |
| SMMPA13952 | 18  | 15  | 15 | 57  | 80  | 50  | 40  | 60  | 46  |
| SMMPA13953 | 102 | 116 | 96 | 78  | 78  | 76  | 88  | 121 | 126 |
| SMMPA13954 | 18  | 16  | 7  | 60  | 66  | 30  | 27  | 42  | 36  |
| SMMPA13955 | 18  | 30  | 12 | 92  | 77  | 57  | 69  | 81  | 77  |
| SMMPA13956 | 11  | 11  | 10 | 68  | 59  | 58  | 55  | 58  | 41  |
| SMMPA13957 | 15  | 26  | 20 | 56  | 37  | 42  | 30  | 53  | 48  |
| SMMPA13958 | 10  | 13  | 5  | 84  | 57  | 66  | 49  | 57  | 44  |
| SMMPA13959 | 16  | 17  | 11 | 54  | 43  | 49  | 37  | 47  | 49  |
| SMMPA13960 | 8   | 9   | 8  | 23  | 24  | 14  | 9   | 13  | 6   |
| SMMPA13961 | 19  | 15  | 21 | 86  | 63  | 51  | 28  | 54  | 42  |
| SMMPA13962 | 11  | 8   | 5  | 31  | 39  | 18  | 14  | 16  | 18  |
| SMMPA13963 | 8   | 7   | 6  | 23  | 12  | 27  | 12  | 19  | 16  |
| SMMPA13964 | 13  | 13  | 11 | 55  | 75  | 61  | 15  | 33  | 18  |
| SMMPA13965 | 23  | 12  | 17 | 30  | 49  | 40  | 22  | 45  | 30  |
| SMMPA13966 | 19  | 18  | 14 | 254 | 224 | 170 | 115 | 170 | 153 |
| SMMPA13967 | 11  | 15  | 17 | 235 | 237 | 181 | 89  | 139 | 94  |
| SMMPA13968 | 33  | 42  | 33 | 116 | 107 | 62  | 68  | 86  | 75  |
| SMMPA13969 | 8   | 17  | 11 | 12  | 17  | 9   | 13  | 23  | 17  |
| SMMPA13970 | 30  | 22  | 18 | 72  | 65  | 56  | 31  | 41  | 48  |
| SMMPA13971 | 18  | 19  | 21 | 20  | 17  | 13  | 7   | 30  | 26  |
| SMMPA13972 | 37  | 35  | 34 | 64  | 54  | 46  | 56  | 55  | 61  |
| SMMPA13973 | 32  | 38  | 21 | 21  | 42  | 21  | 33  | 44  | 35  |
| SMMPA13974 | 40  | 40  | 21 | 76  | 68  | 55  | 51  | 70  | 77  |
| SMMPA13975 | 18  | 18  | 11 | 31  | 29  | 24  | 29  | 29  | 27  |
| SMMPA13976 | 40  | 43  | 24 | 33  | 36  | 49  | 30  | 44  | 43  |
| SMMPA13977 | 18  | 36  | 18 | 41  | 44  | 30  | 28  | 43  | 35  |
| SMMPA13978 | 11  | 16  | 8  | 10  | 14  | 23  | 23  | 28  | 29  |
| SMMPA13979 | 26  | 26  | 27 | 48  | 45  | 41  | 37  | 36  | 46  |
| SMMPA13980 | 30  | 24  | 25 | 62  | 37  | 39  | 33  | 47  | 41  |
| SMMPA13981 | 36  | 41  | 49 | 96  | 82  | 89  | 57  | 73  | 82  |
| SMMPA13982 | 30  | 35  | 28 | 94  | 82  | 72  | 57  | 82  | 69  |
| SMMPA13983 | 8   | 11  | 6  | 8   | 8   | 8   | 8   | 9   | 20  |
| SMMPA13984 | 27  | 29  | 26 | 51  | 47  | 33  | 31  | 41  | 47  |

|            |     |     |     |     |     |     |     |     |     |
|------------|-----|-----|-----|-----|-----|-----|-----|-----|-----|
| SMMPA13985 | 14  | 16  | 19  | 45  | 45  | 25  | 27  | 28  | 23  |
| SMMPA13986 | 23  | 29  | 24  | 123 | 121 | 91  | 90  | 95  | 98  |
| SMMPA13987 | 34  | 34  | 38  | 161 | 157 | 111 | 73  | 134 | 101 |
| SMMPA13988 | 16  | 21  | 18  | 77  | 66  | 70  | 49  | 58  | 53  |
| SMMPA13989 | 22  | 20  | 26  | 69  | 73  | 65  | 36  | 50  | 33  |
| SMMPA13990 | 24  | 24  | 25  | 29  | 23  | 30  | 33  | 35  | 34  |
| SMMPA13991 | 13  | 16  | 5   | 31  | 22  | 19  | 29  | 49  | 34  |
| SMMPA13992 | 23  | 23  | 26  | 28  | 33  | 23  | 14  | 18  | 21  |
| SMMPA13993 | 11  | 14  | 17  | 17  | 23  | 17  | 19  | 20  | 15  |
| SMMPA13994 | 24  | 30  | 15  | 55  | 43  | 40  | 34  | 27  | 31  |
| SMMPA13995 | 21  | 28  | 26  | 43  | 29  | 37  | 30  | 37  | 43  |
| SMMPA13996 | 8   | 9   | 6   | 5   | 8   | 6   | 7   | 12  | 11  |
| SMMPA13997 | 35  | 33  | 38  | 49  | 32  | 51  | 42  | 53  | 65  |
| SMMPA13998 | 33  | 27  | 26  | 33  | 24  | 22  | 39  | 28  | 47  |
| SMMPA13999 | 13  | 14  | 13  | 24  | 11  | 20  | 23  | 22  | 25  |
| SMMPA14000 | 17  | 13  | 17  | 29  | 15  | 11  | 19  | 31  | 27  |
| SMMPA14001 | 10  | 13  | 15  | 22  | 15  | 12  | 20  | 18  | 23  |
| SMMPA14002 | 21  | 15  | 11  | 109 | 97  | 62  | 37  | 42  | 57  |
| SMMPA14003 | 28  | 29  | 27  | 36  | 19  | 22  | 35  | 42  | 60  |
| SMMPA14004 | 24  | 17  | 16  | 28  | 22  | 24  | 21  | 35  | 33  |
| SMMPA14005 | 55  | 41  | 32  | 181 | 170 | 149 | 95  | 130 | 109 |
| SMMPA14006 | 7   | 6   | 6   | 19  | 32  | 24  | 25  | 19  | 20  |
| SMMPA14007 | 21  | 20  | 17  | 88  | 74  | 56  | 26  | 38  | 42  |
| SMMPA14008 | 15  | 24  | 11  | 36  | 38  | 29  | 21  | 28  | 32  |
| SMMPA14009 | 12  | 20  | 13  | 83  | 50  | 43  | 24  | 29  | 42  |
| SMMPA14010 | 13  | 16  | 16  | 47  | 46  | 34  | 30  | 30  | 30  |
| SMMPA14011 | 55  | 71  | 63  | 136 | 111 | 84  | 75  | 76  | 112 |
| SMMPA14012 | 30  | 31  | 17  | 97  | 94  | 72  | 59  | 76  | 68  |
| SMMPA14013 | 17  | 26  | 18  | 82  | 63  | 58  | 40  | 46  | 36  |
| SMMPA14014 | 26  | 18  | 18  | 62  | 52  | 46  | 33  | 44  | 50  |
| SMMPA14015 | 21  | 31  | 29  | 123 | 126 | 114 | 61  | 84  | 64  |
| SMMPA14016 | 20  | 22  | 25  | 85  | 72  | 40  | 46  | 54  | 48  |
| SMMPA14017 | 42  | 41  | 43  | 161 | 151 | 111 | 79  | 120 | 125 |
| SMMPA14018 | 64  | 93  | 52  | 310 | 217 | 188 | 98  | 157 | 131 |
| SMMPA14019 | 21  | 22  | 12  | 257 | 242 | 192 | 82  | 103 | 80  |
| SMMPA14020 | 42  | 36  | 29  | 49  | 49  | 47  | 38  | 47  | 55  |
| SMMPA14021 | 34  | 43  | 36  | 43  | 34  | 48  | 41  | 54  | 43  |
| SMMPA14022 | 10  | 17  | 14  | 30  | 12  | 18  | 29  | 33  | 32  |
| SMMPA14023 | 179 | 144 | 156 | 58  | 62  | 83  | 114 | 185 | 191 |
| SMMPA14024 | 15  | 15  | 11  | 14  | 13  | 15  | 11  | 19  | 14  |
| SMMPA14025 | 9   | 14  | 8   | 15  | 17  | 16  | 17  | 26  | 24  |

|            |    |    |    |     |     |     |     |     |     |
|------------|----|----|----|-----|-----|-----|-----|-----|-----|
| SMMPA14026 | 11 | 8  | 6  | 5   | 4   | 5   | 5   | 18  | 15  |
| SMMPA14027 | 57 | 47 | 44 | 20  | 18  | 21  | 31  | 44  | 52  |
| SMMPA14028 | 15 | 21 | 14 | 99  | 90  | 72  | 58  | 56  | 49  |
| SMMPA14029 | 14 | 15 | 23 | 19  | 21  | 24  | 20  | 22  | 41  |
| SMMPA14030 | 12 | 10 | 13 | 72  | 60  | 48  | 39  | 48  | 41  |
| SMMPA14031 | 13 | 20 | 5  | 4   | 7   | 5   | 12  | 12  | 20  |
| SMMPA14032 | 8  | 5  | 4  | 1   | 6   | 2   | 7   | 6   | 4   |
| SMMPA14033 | 8  | 12 | 7  | 11  | 14  | 9   | 11  | 10  | 10  |
| SMMPA14034 | 15 | 19 | 15 | 21  | 26  | 16  | 29  | 26  | 32  |
| SMMPA14035 | 7  | 16 | 5  | 112 | 87  | 66  | 46  | 63  | 58  |
| SMMPA14036 | 16 | 22 | 18 | 31  | 27  | 25  | 50  | 42  | 45  |
| SMMPA14037 | 23 | 17 | 16 | 43  | 41  | 32  | 34  | 59  | 47  |
| SMMPA14038 | 29 | 26 | 25 | 40  | 41  | 24  | 34  | 48  | 60  |
| SMMPA14039 | 20 | 16 | 18 | 16  | 31  | 32  | 27  | 29  | 23  |
| SMMPA14040 | 29 | 17 | 12 | 67  | 69  | 51  | 42  | 53  | 49  |
| SMMPA14041 | 27 | 19 | 21 | 47  | 31  | 30  | 27  | 37  | 27  |
| SMMPA14042 | 23 | 25 | 24 | 61  | 48  | 51  | 49  | 66  | 50  |
| SMMPA14043 | 8  | 13 | 8  | 22  | 19  | 11  | 17  | 16  | 17  |
| SMMPA14044 | 14 | 21 | 19 | 16  | 33  | 28  | 19  | 27  | 20  |
| SMMPA14045 | 20 | 20 | 26 | 20  | 28  | 20  | 12  | 22  | 20  |
| SMMPA14046 | 7  | 11 | 4  | 18  | 16  | 17  | 20  | 19  | 19  |
| SMMPA14047 | 9  | 6  | 6  | 3   | 9   | 5   | 5   | 14  | 15  |
| SMMPA14048 | 10 | 9  | 15 | 16  | 13  | 20  | 14  | 12  | 12  |
| SMMPA14049 | 17 | 16 | 11 | 7   | 8   | 21  | 26  | 29  | 32  |
| SMMPA14050 | 15 | 20 | 19 | 77  | 57  | 57  | 50  | 63  | 55  |
| SMMPA14051 | 18 | 22 | 14 | 30  | 23  | 21  | 27  | 43  | 24  |
| SMMPA14052 | 13 | 11 | 12 | 10  | 11  | 16  | 15  | 17  | 19  |
| SMMPA14053 | 22 | 14 | 20 | 20  | 20  | 21  | 11  | 30  | 25  |
| SMMPA14054 | 24 | 38 | 21 | 79  | 62  | 47  | 44  | 51  | 50  |
| SMMPA14055 | 31 | 31 | 24 | 33  | 23  | 23  | 24  | 44  | 38  |
| SMMPA14056 | 9  | 7  | 12 | 28  | 21  | 26  | 24  | 18  | 18  |
| SMMPA14057 | 37 | 32 | 32 | 67  | 81  | 55  | 51  | 68  | 63  |
| SMMPA14058 | 39 | 36 | 35 | 81  | 101 | 72  | 57  | 62  | 81  |
| SMMPA14059 | 39 | 36 | 29 | 89  | 68  | 56  | 56  | 56  | 73  |
| SMMPA14060 | 33 | 50 | 46 | 78  | 72  | 66  | 84  | 83  | 102 |
| SMMPA14061 | 14 | 28 | 11 | 60  | 43  | 33  | 29  | 31  | 36  |
| SMMPA14062 | 67 | 65 | 68 | 53  | 47  | 52  | 57  | 58  | 65  |
| SMMPA14063 | 35 | 38 | 23 | 25  | 31  | 34  | 25  | 33  | 40  |
| SMMPA14064 | 21 | 28 | 12 | 175 | 184 | 166 | 112 | 138 | 130 |
| SMMPA14065 | 60 | 72 | 52 | 103 | 114 | 78  | 60  | 78  | 82  |
| SMMPA14066 | 37 | 29 | 35 | 40  | 45  | 34  | 34  | 35  | 37  |



|            |    |    |    |     |     |    |    |    |    |
|------------|----|----|----|-----|-----|----|----|----|----|
| SMMPA14067 | 43 | 45 | 31 | 75  | 63  | 48 | 60 | 63 | 85 |
| SMMPA14068 | 28 | 25 | 28 | 22  | 16  | 24 | 24 | 28 | 34 |
| SMMPA14069 | 59 | 58 | 43 | 146 | 131 | 83 | 64 | 68 | 65 |
| SMMPA14070 | 33 | 26 | 21 | 37  | 36  | 26 | 33 | 34 | 51 |
| SMMPA14071 | 14 | 19 | 16 | 59  | 49  | 38 | 38 | 58 | 44 |
| SMMPA14072 | 18 | 14 | 24 | 73  | 55  | 50 | 33 | 42 | 46 |
| SMMPA14073 | 17 | 15 | 14 | 46  | 44  | 36 | 22 | 33 | 35 |
| SMMPA14074 | 10 | 10 | 15 | 11  | 7   | 11 | 15 | 13 | 15 |
| SMMPA14075 | 37 | 46 | 26 | 42  | 55  | 39 | 54 | 59 | 53 |
| SMMPA14076 | 21 | 11 | 15 | 21  | 29  | 18 | 15 | 27 | 28 |
| SMMPA14077 | 8  | 7  | 13 | 14  | 20  | 20 | 10 | 18 | 8  |
| SMMPA14078 | 22 | 29 | 16 | 25  | 19  | 30 | 20 | 27 | 28 |
| SMMPA14079 | 10 | 17 | 18 | 27  | 30  | 40 | 28 | 29 | 23 |
| SMMPA14080 | 20 | 6  | 15 | 21  | 18  | 17 | 16 | 18 | 17 |
| SMMPA14081 | 1  | 2  | 3  | 11  | 5   | 9  | 7  | 7  | 7  |
| SMMPA14082 | 11 | 17 | 13 | 17  | 13  | 11 | 13 | 15 | 15 |
| SMMPA14083 | 17 | 14 | 14 | 21  | 20  | 23 | 21 | 31 | 17 |
| SMMPA14084 | 19 | 24 | 21 | 100 | 91  | 79 | 39 | 50 | 39 |
| SMMPA14085 | 23 | 9  | 7  | 8   | 20  | 16 | 19 | 18 | 15 |
| SMMPA14086 | 23 | 26 | 12 | 33  | 34  | 28 | 21 | 34 | 49 |
| SMMPA14087 | 18 | 18 | 15 | 21  | 13  | 31 | 13 | 19 | 23 |
| SMMPA14088 | 9  | 15 | 14 | 29  | 22  | 36 | 26 | 32 | 29 |
| SMMPA14089 | 11 | 10 | 6  | 18  | 19  | 14 | 9  | 13 | 8  |
| SMMPA14090 | 16 | 12 | 14 | 32  | 23  | 29 | 27 | 23 | 20 |
| SMMPA14091 | 24 | 29 | 14 | 15  | 23  | 26 | 22 | 30 | 20 |
| SMMPA14092 | 21 | 19 | 19 | 38  | 38  | 43 | 35 | 34 | 41 |
| SMMPA14093 | 12 | 13 | 15 | 19  | 12  | 14 | 21 | 22 | 17 |
| SMMPA14094 | 24 | 21 | 14 | 20  | 19  | 24 | 16 | 24 | 32 |
| SMMPA14095 | 6  | 10 | 3  | 17  | 10  | 11 | 16 | 17 | 14 |
| SMMPA14096 | 3  | 13 | 15 | 17  | 10  | 8  | 13 | 20 | 19 |
| SMMPA14097 | 25 | 20 | 14 | 23  | 18  | 10 | 22 | 23 | 21 |
| SMMPA14098 | 6  | 14 | 9  | 14  | 20  | 15 | 14 | 22 | 20 |
| SMMPA14099 | 19 | 17 | 24 | 25  | 26  | 39 | 20 | 23 | 31 |
| SMMPA14100 | 19 | 18 | 28 | 27  | 20  | 27 | 34 | 40 | 32 |
| SMMPA14101 | 30 | 37 | 15 | 61  | 47  | 44 | 30 | 34 | 50 |
| SMMPA14102 | 41 | 60 | 48 | 22  | 19  | 26 | 36 | 39 | 38 |
| SMMPA14103 | 12 | 22 | 19 | 24  | 20  | 24 | 30 | 38 | 27 |
| SMMPA14104 | 15 | 20 | 21 | 20  | 19  | 14 | 17 | 15 | 22 |
| SMMPA14105 | 16 | 21 | 10 | 21  | 25  | 17 | 20 | 20 | 20 |
| SMMPA14106 | 21 | 33 | 29 | 72  | 69  | 53 | 53 | 47 | 60 |
| SMMPA14107 | 30 | 31 | 34 | 60  | 71  | 62 | 69 | 93 | 96 |

|            |     |     |     |     |     |     |     |     |     |
|------------|-----|-----|-----|-----|-----|-----|-----|-----|-----|
| SMMPA14108 | 17  | 16  | 17  | 41  | 40  | 42  | 29  | 25  | 32  |
| SMMPA14109 | 15  | 14  | 21  | 14  | 3   | 19  | 25  | 25  | 38  |
| SMMPA14110 | 22  | 21  | 23  | 26  | 25  | 22  | 36  | 49  | 35  |
| SMMPA14111 | 16  | 13  | 20  | 9   | 14  | 9   | 18  | 35  | 29  |
| SMMPA14112 | 12  | 1   | 12  | 5   | 4   | 6   | 12  | 11  | 22  |
| SMMPA14113 | 13  | 20  | 8   | 19  | 21  | 14  | 24  | 21  | 29  |
| SMMPA14114 | 28  | 18  | 16  | 10  | 18  | 20  | 37  | 44  | 52  |
| SMMPA14115 | 17  | 16  | 17  | 42  | 32  | 32  | 23  | 36  | 31  |
| SMMPA14116 | 10  | 18  | 12  | 60  | 49  | 64  | 27  | 48  | 42  |
| SMMPA14117 | 7   | 11  | 5   | 12  | 17  | 6   | 10  | 27  | 16  |
| SMMPA14118 | 34  | 39  | 46  | 67  | 70  | 57  | 57  | 77  | 71  |
| SMMPA14119 | 18  | 30  | 15  | 62  | 66  | 59  | 42  | 52  | 50  |
| SMMPA14120 | 12  | 19  | 15  | 219 | 186 | 148 | 108 | 140 | 132 |
| SMMPA14121 | 27  | 26  | 16  | 65  | 79  | 56  | 39  | 54  | 45  |
| SMMPA14122 | 37  | 31  | 36  | 30  | 26  | 27  | 36  | 59  | 52  |
| SMMPA14123 | 35  | 25  | 30  | 45  | 44  | 46  | 43  | 55  | 55  |
| SMMPA14124 | 25  | 19  | 27  | 39  | 27  | 22  | 26  | 35  | 43  |
| SMMPA14125 | 7   | 9   | 12  | 7   | 7   | 9   | 12  | 11  | 14  |
| SMMPA14126 | 24  | 22  | 30  | 33  | 36  | 25  | 52  | 46  | 49  |
| SMMPA14127 | 18  | 4   | 8   | 10  | 12  | 14  | 16  | 26  | 23  |
| SMMPA14128 | 12  | 16  | 9   | 14  | 5   | 7   | 13  | 21  | 19  |
| SMMPA14129 | 1   | 3   | 0   | 3   | 3   | 2   | 9   | 9   | 7   |
| SMMPA14130 | 18  | 27  | 31  | 111 | 75  | 56  | 76  | 137 | 98  |
| SMMPA14131 | 26  | 35  | 24  | 113 | 99  | 74  | 72  | 81  | 97  |
| SMMPA14132 | 15  | 6   | 12  | 18  | 21  | 18  | 33  | 26  | 36  |
| SMMPA14133 | 44  | 44  | 47  | 229 | 256 | 165 | 140 | 197 | 126 |
| SMMPA14134 | 53  | 56  | 53  | 138 | 118 | 98  | 108 | 139 | 128 |
| SMMPA14135 | 35  | 45  | 21  | 77  | 82  | 46  | 61  | 79  | 90  |
| SMMPA14136 | 40  | 56  | 39  | 99  | 119 | 81  | 82  | 116 | 76  |
| SMMPA14137 | 62  | 46  | 43  | 147 | 129 | 83  | 127 | 155 | 148 |
| SMMPA14138 | 18  | 20  | 17  | 24  | 23  | 19  | 17  | 11  | 18  |
| SMMPA14139 | 36  | 29  | 39  | 206 | 198 | 161 | 96  | 98  | 104 |
| SMMPA14140 | 32  | 25  | 22  | 55  | 55  | 50  | 67  | 67  | 69  |
| SMMPA14141 | 11  | 10  | 5   | 28  | 24  | 21  | 20  | 33  | 16  |
| SMMPA14142 | 36  | 32  | 27  | 530 | 509 | 412 | 215 | 285 | 251 |
| SMMPA14143 | 21  | 31  | 16  | 206 | 167 | 143 | 59  | 111 | 93  |
| SMMPA14144 | 18  | 15  | 10  | 119 | 95  | 90  | 40  | 85  | 70  |
| SMMPA14145 | 15  | 25  | 14  | 80  | 70  | 61  | 41  | 41  | 70  |
| SMMPA14146 | 147 | 147 | 133 | 416 | 341 | 332 | 263 | 290 | 298 |
| SMMPA14147 | 19  | 24  | 16  | 561 | 581 | 460 | 241 | 274 | 262 |
| SMMPA14148 | 23  | 32  | 31  | 204 | 239 | 134 | 100 | 141 | 139 |

|            |     |     |     |     |     |     |     |     |     |
|------------|-----|-----|-----|-----|-----|-----|-----|-----|-----|
| SMMPA14149 | 142 | 156 | 121 | 260 | 245 | 223 | 186 | 313 | 249 |
| SMMPA14150 | 17  | 15  | 11  | 193 | 167 | 107 | 73  | 91  | 95  |
| SMMPA14151 | 41  | 41  | 36  | 140 | 137 | 104 | 62  | 126 | 113 |
| SMMPA14152 | 11  | 4   | 8   | 13  | 11  | 6   | 7   | 10  | 10  |
| SMMPA14153 | 13  | 13  | 10  | 77  | 75  | 56  | 38  | 45  | 49  |
| SMMPA14154 | 16  | 17  | 14  | 7   | 9   | 12  | 8   | 15  | 13  |
| SMMPA14155 | 14  | 9   | 6   | 77  | 92  | 68  | 39  | 45  | 54  |
| SMMPA14156 | 1   | 2   | 2   | 2   | 1   | 4   | 0   | 2   | 4   |
| SMMPA14157 | 3   | 4   | 0   | 6   | 10  | 9   | 1   | 5   | 4   |
| SMMPA14158 | 18  | 14  | 18  | 50  | 41  | 39  | 36  | 47  | 46  |
| SMMPA14159 | 24  | 22  | 25  | 38  | 32  | 27  | 41  | 42  | 56  |
| SMMPA14160 | 31  | 19  | 19  | 77  | 82  | 55  | 56  | 66  | 67  |
| SMMPA14161 | 27  | 32  | 29  | 36  | 40  | 32  | 35  | 35  | 38  |
| SMMPA14162 | 9   | 10  | 9   | 2   | 2   | 6   | 16  | 19  | 19  |
| SMMPA14163 | 8   | 12  | 13  | 11  | 10  | 12  | 14  | 12  | 16  |
| SMMPA14164 | 13  | 10  | 16  | 96  | 97  | 67  | 42  | 42  | 28  |
| SMMPA14165 | 33  | 19  | 27  | 48  | 32  | 44  | 48  | 75  | 64  |
| SMMPA14166 | 33  | 15  | 17  | 30  | 27  | 22  | 26  | 48  | 42  |
| SMMPA14167 | 28  | 16  | 21  | 32  | 23  | 24  | 40  | 41  | 42  |
| SMMPA14168 | 40  | 39  | 35  | 110 | 95  | 71  | 63  | 96  | 86  |
| SMMPA14169 | 30  | 32  | 31  | 48  | 40  | 45  | 49  | 48  | 49  |
| SMMPA14170 | 35  | 32  | 40  | 153 | 179 | 117 | 88  | 128 | 114 |
| SMMPA14171 | 15  | 14  | 30  | 35  | 18  | 20  | 12  | 41  | 48  |
| SMMPA14172 | 40  | 32  | 31  | 192 | 145 | 120 | 88  | 128 | 102 |
| SMMPA14173 | 31  | 33  | 35  | 50  | 53  | 36  | 32  | 48  | 45  |
| SMMPA14174 | 25  | 26  | 23  | 25  | 22  | 19  | 17  | 39  | 24  |
| SMMPA14175 | 4   | 12  | 2   | 9   | 12  | 10  | 7   | 18  | 12  |
| SMMPA14176 | 15  | 11  | 13  | 35  | 18  | 29  | 14  | 31  | 34  |
| SMMPA14177 | 54  | 49  | 54  | 79  | 61  | 85  | 59  | 72  | 62  |
| SMMPA14178 | 22  | 19  | 23  | 20  | 19  | 18  | 15  | 29  | 15  |
| SMMPA14179 | 20  | 24  | 33  | 20  | 12  | 17  | 13  | 30  | 22  |
| SMMPA14180 | 32  | 48  | 33  | 51  | 45  | 38  | 27  | 57  | 49  |
| SMMPA14181 | 23  | 11  | 25  | 17  | 15  | 15  | 22  | 33  | 32  |
| SMMPA14182 | 29  | 28  | 24  | 96  | 94  | 70  | 47  | 52  | 56  |
| SMMPA14183 | 48  | 65  | 59  | 53  | 37  | 36  | 31  | 64  | 62  |
| SMMPA14184 | 48  | 45  | 56  | 90  | 114 | 88  | 88  | 115 | 120 |
| SMMPA14185 | 37  | 54  | 37  | 132 | 118 | 114 | 70  | 87  | 97  |
| SMMPA14186 | 26  | 32  | 25  | 64  | 60  | 51  | 34  | 38  | 42  |
| SMMPA14187 | 15  | 15  | 5   | 43  | 37  | 28  | 25  | 34  | 27  |
| SMMPA14188 | 11  | 19  | 10  | 80  | 77  | 69  | 34  | 59  | 67  |
| SMMPA14189 | 24  | 30  | 34  | 79  | 59  | 61  | 47  | 53  | 61  |

|            |    |    |    |     |     |     |    |     |     |
|------------|----|----|----|-----|-----|-----|----|-----|-----|
| SMMPA14190 | 6  | 9  | 11 | 37  | 31  | 20  | 20 | 19  | 22  |
| SMMPA14191 | 32 | 29 | 23 | 114 | 81  | 78  | 65 | 81  | 78  |
| SMMPA14192 | 31 | 30 | 36 | 86  | 69  | 57  | 55 | 72  | 70  |
| SMMPA14193 | 16 | 10 | 7  | 22  | 24  | 22  | 24 | 25  | 29  |
| SMMPA14194 | 19 | 31 | 36 | 104 | 116 | 84  | 64 | 69  | 72  |
| SMMPA14195 | 41 | 33 | 38 | 154 | 129 | 122 | 80 | 100 | 88  |
| SMMPA14196 | 14 | 17 | 14 | 67  | 71  | 52  | 48 | 51  | 36  |
| SMMPA14197 | 15 | 25 | 21 | 48  | 33  | 24  | 48 | 55  | 61  |
| SMMPA14198 | 67 | 65 | 72 | 29  | 39  | 46  | 82 | 108 | 104 |
| SMMPA14199 | 27 | 17 | 16 | 25  | 31  | 22  | 30 | 36  | 40  |
| SMMPA14200 | 18 | 19 | 12 | 16  | 15  | 14  | 20 | 29  | 34  |
| SMMPA14201 | 8  | 16 | 11 | 22  | 21  | 24  | 31 | 33  | 41  |
| SMMPA14202 | 17 | 22 | 24 | 22  | 17  | 26  | 26 | 40  | 37  |
| SMMPA14203 | 4  | 4  | 4  | 4   | 5   | 2   | 5  | 6   | 4   |
| SMMPA14204 | 12 | 15 | 14 | 20  | 17  | 15  | 14 | 18  | 22  |
| SMMPA14205 | 18 | 17 | 24 | 11  | 16  | 16  | 23 | 25  | 29  |
| SMMPA14206 | 38 | 25 | 30 | 62  | 70  | 48  | 42 | 69  | 60  |
| SMMPA14207 | 24 | 17 | 16 | 40  | 46  | 35  | 36 | 56  | 37  |
| SMMPA14208 | 36 | 37 | 30 | 21  | 28  | 18  | 37 | 53  | 44  |
| SMMPA14209 | 13 | 12 | 10 | 10  | 12  | 9   | 11 | 18  | 10  |
| SMMPA14210 | 73 | 69 | 58 | 40  | 37  | 32  | 47 | 63  | 69  |
| SMMPA14211 | 23 | 25 | 29 | 7   | 9   | 14  | 36 | 32  | 44  |
| SMMPA14212 | 14 | 14 | 28 | 27  | 23  | 31  | 27 | 39  | 33  |
| SMMPA14213 | 12 | 11 | 17 | 18  | 14  | 17  | 20 | 19  | 25  |
| SMMPA14214 | 28 | 22 | 19 | 46  | 32  | 27  | 42 | 45  | 43  |
| SMMPA14215 | 7  | 8  | 8  | 9   | 10  | 10  | 7  | 11  | 11  |
| SMMPA14216 | 26 | 31 | 29 | 34  | 37  | 35  | 23 | 34  | 43  |
| SMMPA14217 | 9  | 14 | 15 | 35  | 30  | 18  | 29 | 33  | 26  |
| SMMPA14218 | 14 | 28 | 22 | 36  | 28  | 24  | 23 | 30  | 38  |
| SMMPA14219 | 11 | 6  | 11 | 46  | 34  | 20  | 13 | 33  | 29  |
| SMMPA14220 | 9  | 9  | 7  | 64  | 69  | 51  | 20 | 33  | 23  |
| SMMPA14221 | 21 | 27 | 18 | 26  | 37  | 26  | 28 | 53  | 49  |
| SMMPA14222 | 26 | 42 | 32 | 45  | 43  | 35  | 30 | 57  | 45  |
| SMMPA14223 | 21 | 29 | 27 | 33  | 27  | 27  | 35 | 39  | 43  |
| SMMPA14224 | 31 | 31 | 27 | 125 | 112 | 91  | 76 | 110 | 103 |
| SMMPA14225 | 7  | 5  | 11 | 18  | 13  | 13  | 10 | 21  | 11  |
| SMMPA14226 | 15 | 14 | 14 | 33  | 29  | 27  | 27 | 30  | 20  |
| SMMPA14227 | 18 | 16 | 22 | 30  | 25  | 27  | 17 | 33  | 31  |
| SMMPA14228 | 22 | 12 | 14 | 15  | 16  | 15  | 10 | 18  | 13  |
| SMMPA14229 | 6  | 9  | 8  | 8   | 5   | 5   | 10 | 8   | 12  |
| SMMPA14230 | 17 | 14 | 17 | 25  | 17  | 24  | 29 | 29  | 27  |

|            |     |     |     |     |     |     |     |     |     |
|------------|-----|-----|-----|-----|-----|-----|-----|-----|-----|
| SMMPA14231 | 3   | 7   | 11  | 6   | 14  | 18  | 10  | 9   | 10  |
| SMMPA14232 | 5   | 6   | 5   | 9   | 7   | 13  | 9   | 4   | 7   |
| SMMPA14233 | 18  | 15  | 18  | 8   | 9   | 13  | 15  | 30  | 19  |
| SMMPA14234 | 0   | 1   | 0   | 1   | 0   | 0   | 0   | 0   | 0   |
| SMMPA14235 | 5   | 5   | 5   | 4   | 8   | 6   | 14  | 11  | 11  |
| SMMPA14236 | 29  | 28  | 31  | 15  | 19  | 15  | 24  | 30  | 36  |
| SMMPA14237 | 36  | 29  | 26  | 29  | 26  | 40  | 39  | 57  | 58  |
| SMMPA14238 | 15  | 10  | 13  | 12  | 18  | 13  | 22  | 32  | 21  |
| SMMPA14239 | 13  | 8   | 7   | 8   | 7   | 14  | 15  | 19  | 17  |
| SMMPA14240 | 20  | 15  | 16  | 26  | 14  | 19  | 20  | 26  | 42  |
| SMMPA14241 | 30  | 25  | 32  | 16  | 17  | 17  | 36  | 48  | 42  |
| SMMPA14242 | 28  | 35  | 27  | 75  | 80  | 70  | 38  | 53  | 59  |
| SMMPA14243 | 20  | 29  | 24  | 61  | 43  | 48  | 32  | 41  | 36  |
| SMMPA14244 | 4   | 3   | 1   | 16  | 14  | 9   | 5   | 4   | 12  |
| SMMPA14245 | 28  | 30  | 32  | 133 | 140 | 81  | 65  | 96  | 92  |
| SMMPA14246 | 8   | 14  | 4   | 14  | 17  | 15  | 21  | 25  | 27  |
| SMMPA14247 | 16  | 17  | 3   | 32  | 24  | 25  | 25  | 32  | 30  |
| SMMPA14248 | 10  | 18  | 15  | 90  | 96  | 75  | 40  | 67  | 50  |
| SMMPA14249 | 14  | 18  | 17  | 15  | 14  | 18  | 20  | 41  | 34  |
| SMMPA14250 | 3   | 3   | 1   | 10  | 4   | 5   | 2   | 8   | 1   |
| SMMPA14251 | 22  | 25  | 15  | 167 | 150 | 146 | 65  | 100 | 85  |
| SMMPA14252 | 35  | 22  | 30  | 139 | 136 | 102 | 84  | 120 | 121 |
| SMMPA14253 | 20  | 30  | 23  | 63  | 48  | 39  | 51  | 57  | 55  |
| SMMPA14254 | 35  | 27  | 28  | 26  | 20  | 22  | 20  | 33  | 30  |
| SMMPA14255 | 40  | 25  | 29  | 85  | 69  | 57  | 61  | 68  | 77  |
| SMMPA14256 | 29  | 27  | 23  | 36  | 37  | 38  | 33  | 41  | 41  |
| SMMPA14257 | 22  | 28  | 29  | 30  | 31  | 18  | 30  | 41  | 31  |
| SMMPA14258 | 35  | 49  | 41  | 44  | 32  | 38  | 45  | 56  | 75  |
| SMMPA14259 | 199 | 218 | 170 | 97  | 97  | 107 | 133 | 154 | 156 |
| SMMPA14260 | 98  | 95  | 66  | 120 | 94  | 84  | 72  | 107 | 94  |
| SMMPA14261 | 27  | 28  | 20  | 29  | 35  | 22  | 20  | 32  | 42  |
| SMMPA14262 | 27  | 38  | 41  | 93  | 78  | 75  | 48  | 68  | 75  |
| SMMPA14263 | 37  | 22  | 33  | 90  | 92  | 66  | 49  | 53  | 69  |
| SMMPA14264 | 28  | 22  | 16  | 37  | 21  | 30  | 24  | 24  | 25  |
| SMMPA14265 | 8   | 11  | 11  | 20  | 14  | 16  | 16  | 21  | 21  |
| SMMPA14266 | 18  | 25  | 10  | 70  | 61  | 50  | 50  | 56  | 51  |
| SMMPA14267 | 27  | 21  | 13  | 74  | 58  | 66  | 34  | 57  | 41  |
| SMMPA14268 | 14  | 17  | 12  | 138 | 126 | 98  | 33  | 51  | 54  |
| SMMPA14269 | 17  | 9   | 14  | 11  | 6   | 7   | 15  | 16  | 18  |
| SMMPA14270 | 11  | 16  | 16  | 15  | 18  | 20  | 14  | 26  | 23  |
| SMMPA14271 | 22  | 13  | 11  | 12  | 6   | 13  | 17  | 30  | 17  |

|            |    |    |    |     |     |     |     |     |     |
|------------|----|----|----|-----|-----|-----|-----|-----|-----|
| SMMPA14272 | 34 | 37 | 27 | 39  | 37  | 32  | 38  | 48  | 56  |
| SMMPA14273 | 12 | 20 | 24 | 95  | 67  | 72  | 55  | 63  | 60  |
| SMMPA14274 | 6  | 6  | 3  | 18  | 15  | 10  | 6   | 8   | 7   |
| SMMPA14275 | 1  | 0  | 2  | 1   | 1   | 1   | 0   | 4   | 0   |
| SMMPA14276 | 14 | 21 | 13 | 16  | 24  | 15  | 21  | 19  | 28  |
| SMMPA14277 | 17 | 7  | 11 | 22  | 22  | 17  | 18  | 25  | 16  |
| SMMPA14278 | 8  | 5  | 13 | 32  | 37  | 38  | 16  | 13  | 16  |
| SMMPA14279 | 22 | 27 | 18 | 23  | 27  | 28  | 21  | 35  | 48  |
| SMMPA14280 | 32 | 19 | 19 | 28  | 27  | 36  | 48  | 56  | 53  |
| SMMPA14281 | 44 | 46 | 54 | 136 | 149 | 104 | 80  | 121 | 116 |
| SMMPA14282 | 22 | 26 | 20 | 35  | 27  | 26  | 25  | 34  | 36  |
| SMMPA14283 | 16 | 27 | 15 | 61  | 58  | 34  | 42  | 46  | 50  |
| SMMPA14284 | 29 | 29 | 27 | 142 | 118 | 97  | 73  | 87  | 76  |
| SMMPA14285 | 33 | 34 | 36 | 78  | 80  | 63  | 57  | 56  | 53  |
| SMMPA14286 | 19 | 12 | 19 | 57  | 60  | 48  | 36  | 47  | 40  |
| SMMPA14287 | 19 | 10 | 14 | 49  | 32  | 35  | 19  | 23  | 22  |
| SMMPA14288 | 34 | 30 | 20 | 85  | 64  | 54  | 43  | 50  | 59  |
| SMMPA14289 | 18 | 15 | 5  | 40  | 28  | 28  | 15  | 20  | 17  |
| SMMPA14290 | 12 | 16 | 24 | 82  | 70  | 46  | 61  | 63  | 53  |
| SMMPA14291 | 30 | 25 | 23 | 145 | 161 | 109 | 79  | 96  | 115 |
| SMMPA14292 | 8  | 7  | 14 | 9   | 11  | 3   | 15  | 12  | 16  |
| SMMPA14293 | 20 | 18 | 18 | 29  | 12  | 13  | 13  | 24  | 16  |
| SMMPA14294 | 19 | 31 | 28 | 32  | 37  | 27  | 30  | 38  | 39  |
| SMMPA14295 | 10 | 10 | 13 | 230 | 218 | 177 | 124 | 182 | 160 |
| SMMPA14296 | 2  | 2  | 3  | 7   | 6   | 7   | 6   | 11  | 12  |
| SMMPA14297 | 11 | 17 | 23 | 33  | 28  | 24  | 36  | 36  | 28  |
| SMMPA14298 | 39 | 26 | 32 | 36  | 34  | 30  | 28  | 48  | 51  |
| SMMPA14299 | 36 | 29 | 24 | 57  | 59  | 51  | 40  | 64  | 62  |
| SMMPA14300 | 29 | 38 | 27 | 39  | 22  | 36  | 33  | 46  | 36  |
| SMMPA14301 | 38 | 27 | 34 | 23  | 38  | 35  | 43  | 41  | 33  |
| SMMPA14302 | 42 | 39 | 37 | 56  | 51  | 34  | 29  | 44  | 46  |
| SMMPA14303 | 40 | 41 | 34 | 50  | 65  | 51  | 53  | 60  | 67  |
| SMMPA14304 | 21 | 29 | 32 | 70  | 61  | 66  | 43  | 73  | 50  |
| SMMPA14305 | 24 | 24 | 20 | 60  | 57  | 38  | 36  | 69  | 63  |
| SMMPA14306 | 9  | 12 | 11 | 34  | 18  | 24  | 12  | 12  | 21  |
| SMMPA14307 | 16 | 8  | 7  | 27  | 22  | 17  | 14  | 20  | 25  |
| SMMPA14308 | 15 | 13 | 18 | 45  | 48  | 39  | 29  | 27  | 38  |
| SMMPA14309 | 18 | 13 | 22 | 52  | 36  | 34  | 26  | 35  | 25  |
| SMMPA14310 | 14 | 11 | 8  | 30  | 19  | 17  | 19  | 28  | 17  |
| SMMPA14311 | 29 | 22 | 23 | 38  | 45  | 39  | 35  | 42  | 42  |
| SMMPA14312 | 17 | 21 | 20 | 71  | 63  | 56  | 37  | 33  | 53  |

|            |    |    |    |     |     |     |     |     |     |
|------------|----|----|----|-----|-----|-----|-----|-----|-----|
| SMMPA14313 | 43 | 43 | 47 | 40  | 44  | 55  | 74  | 103 | 81  |
| SMMPA14314 | 9  | 9  | 7  | 11  | 12  | 8   | 16  | 17  | 15  |
| SMMPA14315 | 25 | 20 | 28 | 36  | 31  | 27  | 45  | 32  | 44  |
| SMMPA14316 | 18 | 20 | 18 | 27  | 26  | 19  | 31  | 41  | 41  |
| SMMPA14317 | 49 | 51 | 42 | 203 | 173 | 149 | 100 | 130 | 162 |
| SMMPA14318 | 21 | 30 | 28 | 48  | 51  | 30  | 39  | 40  | 47  |
| SMMPA14319 | 31 | 53 | 36 | 126 | 101 | 79  | 71  | 87  | 91  |
| SMMPA14320 | 11 | 17 | 15 | 691 | 662 | 666 | 347 | 465 | 455 |
| SMMPA14321 | 32 | 25 | 29 | 511 | 440 | 380 | 168 | 195 | 188 |
| SMMPA14322 | 28 | 21 | 24 | 161 | 141 | 82  | 79  | 93  | 100 |
| SMMPA14323 | 31 | 30 | 27 | 314 | 237 | 199 | 107 | 148 | 148 |
| SMMPA14324 | 14 | 9  | 12 | 20  | 18  | 23  | 7   | 14  | 13  |
| SMMPA14325 | 42 | 32 | 27 | 27  | 25  | 23  | 35  | 51  | 35  |
| SMMPA14326 | 9  | 12 | 15 | 25  | 26  | 21  | 36  | 42  | 27  |
| SMMPA14327 | 44 | 41 | 19 | 28  | 28  | 33  | 40  | 59  | 51  |
| SMMPA14328 | 31 | 30 | 31 | 23  | 39  | 26  | 26  | 49  | 53  |
| SMMPA14329 | 27 | 19 | 22 | 28  | 24  | 24  | 26  | 32  | 40  |
| SMMPA14330 | 56 | 48 | 38 | 54  | 46  | 45  | 47  | 50  | 54  |
| SMMPA14331 | 69 | 69 | 48 | 57  | 36  | 47  | 65  | 75  | 75  |
| SMMPA14332 | 39 | 39 | 34 | 48  | 45  | 39  | 31  | 64  | 55  |
| SMMPA14333 | 21 | 17 | 10 | 16  | 15  | 14  | 27  | 26  | 34  |
| SMMPA14334 | 9  | 8  | 10 | 21  | 15  | 12  | 18  | 23  | 19  |
| SMMPA14335 | 7  | 12 | 13 | 21  | 13  | 22  | 19  | 23  | 16  |
| SMMPA14336 | 12 | 20 | 19 | 23  | 23  | 24  | 22  | 32  | 14  |
| SMMPA14337 | 1  | 2  | 2  | 22  | 21  | 15  | 10  | 23  | 16  |
| SMMPA14338 | 18 | 10 | 11 | 36  | 24  | 18  | 24  | 27  | 22  |
| SMMPA14339 | 16 | 18 | 19 | 89  | 95  | 79  | 53  | 72  | 61  |
| SMMPA14340 | 20 | 16 | 21 | 29  | 32  | 30  | 40  | 32  | 42  |
| SMMPA14341 | 15 | 12 | 16 | 36  | 32  | 23  | 24  | 45  | 38  |
| SMMPA14342 | 28 | 36 | 32 | 30  | 33  | 41  | 41  | 45  | 51  |
| SMMPA14343 | 29 | 31 | 26 | 34  | 43  | 39  | 41  | 45  | 40  |
| SMMPA14344 | 16 | 19 | 19 | 116 | 80  | 57  | 60  | 73  | 68  |
| SMMPA14345 | 34 | 41 | 38 | 151 | 139 | 117 | 78  | 97  | 98  |
| SMMPA14346 | 15 | 14 | 19 | 29  | 37  | 20  | 33  | 38  | 28  |
| SMMPA14347 | 21 | 24 | 20 | 86  | 87  | 62  | 34  | 73  | 50  |
| SMMPA14348 | 34 | 33 | 30 | 104 | 91  | 78  | 84  | 95  | 72  |
| SMMPA14349 | 13 | 11 | 16 | 59  | 50  | 33  | 26  | 39  | 35  |
| SMMPA14350 | 2  | 8  | 4  | 27  | 29  | 15  | 7   | 7   | 20  |
| SMMPA14351 | 8  | 14 | 11 | 11  | 13  | 12  | 12  | 21  | 22  |
| SMMPA14352 | 17 | 22 | 17 | 22  | 18  | 23  | 23  | 27  | 32  |
| SMMPA14353 | 14 | 15 | 14 | 22  | 24  | 21  | 22  | 29  | 20  |

|            |    |    |    |     |     |     |     |     |     |
|------------|----|----|----|-----|-----|-----|-----|-----|-----|
| SMMPA14354 | 27 | 21 | 10 | 185 | 159 | 147 | 106 | 165 | 131 |
| SMMPA14355 | 19 | 25 | 14 | 29  | 20  | 31  | 29  | 37  | 28  |
| SMMPA14356 | 16 | 15 | 18 | 52  | 43  | 26  | 35  | 47  | 38  |
| SMMPA14357 | 28 | 21 | 24 | 124 | 115 | 101 | 50  | 83  | 77  |
| SMMPA14358 | 13 | 22 | 19 | 129 | 100 | 105 | 67  | 103 | 96  |
| SMMPA14359 | 18 | 23 | 21 | 18  | 20  | 26  | 18  | 29  | 32  |
| SMMPA14360 | 22 | 18 | 24 | 66  | 63  | 53  | 54  | 54  | 55  |
| SMMPA14361 | 16 | 24 | 19 | 40  | 54  | 43  | 49  | 38  | 33  |
| SMMPA14362 | 16 | 10 | 6  | 55  | 39  | 36  | 32  | 50  | 39  |
| SMMPA14363 | 15 | 17 | 21 | 20  | 26  | 17  | 18  | 22  | 32  |
| SMMPA14364 | 36 | 26 | 40 | 22  | 27  | 13  | 15  | 29  | 27  |
| SMMPA14365 | 18 | 19 | 21 | 25  | 30  | 16  | 30  | 29  | 38  |
| SMMPA14366 | 33 | 35 | 27 | 57  | 62  | 50  | 56  | 76  | 63  |
| SMMPA14367 | 42 | 42 | 42 | 52  | 54  | 46  | 56  | 57  | 74  |
| SMMPA14368 | 32 | 21 | 23 | 17  | 23  | 23  | 34  | 36  | 30  |
| SMMPA14369 | 38 | 24 | 20 | 34  | 28  | 30  | 40  | 32  | 49  |
| SMMPA14370 | 60 | 60 | 44 | 61  | 50  | 53  | 72  | 82  | 78  |
| SMMPA14371 | 19 | 9  | 14 | 11  | 6   | 11  | 15  | 12  | 14  |
| SMMPA14372 | 17 | 21 | 19 | 18  | 10  | 17  | 19  | 23  | 22  |
| SMMPA14373 | 43 | 45 | 47 | 43  | 43  | 41  | 60  | 76  | 59  |
| SMMPA14374 | 2  | 2  | 6  | 5   | 6   | 6   | 4   | 7   | 4   |
| SMMPA14375 | 13 | 13 | 7  | 18  | 12  | 12  | 11  | 12  | 11  |
| SMMPA14376 | 4  | 12 | 2  | 4   | 5   | 3   | 4   | 3   | 10  |
| SMMPA14377 | 7  | 12 | 12 | 16  | 15  | 15  | 11  | 17  | 16  |
| SMMPA14378 | 9  | 5  | 10 | 51  | 37  | 28  | 30  | 29  | 28  |
| SMMPA14379 | 33 | 16 | 23 | 36  | 31  | 31  | 14  | 33  | 24  |
| SMMPA14380 | 15 | 12 | 14 | 62  | 56  | 42  | 34  | 48  | 38  |
| SMMPA14381 | 20 | 33 | 18 | 34  | 26  | 30  | 26  | 26  | 28  |
| SMMPA14382 | 40 | 30 | 27 | 167 | 141 | 123 | 63  | 98  | 79  |
| SMMPA14383 | 33 | 54 | 36 | 104 | 123 | 84  | 45  | 69  | 86  |
| SMMPA14384 | 37 | 21 | 25 | 191 | 172 | 131 | 76  | 133 | 98  |
| SMMPA14385 | 15 | 7  | 7  | 61  | 72  | 42  | 31  | 38  | 31  |
| SMMPA14386 | 5  | 5  | 2  | 1   | 5   | 2   | 5   | 4   | 3   |
| SMMPA14387 | 19 | 20 | 27 | 26  | 26  | 16  | 34  | 25  | 26  |
| SMMPA14388 | 11 | 11 | 13 | 18  | 20  | 12  | 16  | 19  | 21  |
| SMMPA14389 | 25 | 28 | 11 | 70  | 55  | 32  | 29  | 41  | 41  |
| SMMPA14390 | 16 | 20 | 12 | 13  | 8   | 10  | 14  | 14  | 13  |
| SMMPA14391 | 25 | 21 | 22 | 32  | 22  | 29  | 21  | 16  | 33  |
| SMMPA14392 | 79 | 78 | 71 | 64  | 45  | 30  | 54  | 88  | 90  |
| SMMPA14393 | 20 | 14 | 15 | 16  | 22  | 17  | 13  | 24  | 23  |
| SMMPA14394 | 7  | 5  | 6  | 10  | 17  | 12  | 8   | 16  | 11  |



|            |    |    |    |     |     |     |     |     |     |
|------------|----|----|----|-----|-----|-----|-----|-----|-----|
| SMMPA14395 | 23 | 24 | 24 | 67  | 60  | 47  | 37  | 41  | 41  |
| SMMPA14396 | 27 | 29 | 21 | 63  | 58  | 39  | 46  | 52  | 47  |
| SMMPA14397 | 25 | 29 | 23 | 110 | 117 | 74  | 41  | 64  | 63  |
| SMMPA14398 | 12 | 14 | 12 | 357 | 352 | 239 | 148 | 223 | 242 |
| SMMPA14399 | 30 | 46 | 28 | 113 | 114 | 86  | 62  | 93  | 82  |
| SMMPA14400 | 46 | 61 | 54 | 144 | 120 | 107 | 92  | 132 | 128 |
| SMMPA14401 | 17 | 25 | 20 | 78  | 57  | 52  | 51  | 51  | 64  |
| SMMPA14402 | 5  | 8  | 5  | 39  | 33  | 22  | 20  | 24  | 30  |
| SMMPA14403 | 16 | 14 | 13 | 69  | 47  | 35  | 42  | 55  | 49  |
| SMMPA14404 | 41 | 33 | 32 | 90  | 76  | 76  | 73  | 79  | 102 |
| SMMPA14405 | 51 | 61 | 50 | 58  | 58  | 45  | 62  | 98  | 73  |
| SMMPA14406 | 39 | 53 | 44 | 148 | 128 | 79  | 97  | 110 | 100 |
| SMMPA14407 | 40 | 41 | 35 | 72  | 51  | 59  | 49  | 73  | 69  |
| SMMPA14408 | 10 | 11 | 10 | 19  | 15  | 7   | 20  | 10  | 16  |
| SMMPA14409 | 31 | 36 | 35 | 69  | 79  | 56  | 55  | 79  | 82  |
| SMMPA14410 | 5  | 7  | 2  | 4   | 6   | 5   | 11  | 10  | 7   |
| SMMPA14411 | 22 | 27 | 25 | 31  | 30  | 21  | 38  | 41  | 54  |
| SMMPA14412 | 20 | 29 | 31 | 53  | 43  | 45  | 56  | 67  | 53  |
| SMMPA14413 | 20 | 27 | 15 | 359 | 341 | 300 | 155 | 199 | 164 |
| SMMPA14414 | 13 | 15 | 13 | 68  | 55  | 48  | 23  | 44  | 34  |
| SMMPA14415 | 10 | 14 | 8  | 30  | 31  | 20  | 19  | 26  | 24  |
| SMMPA14416 | 6  | 3  | 4  | 22  | 27  | 26  | 11  | 23  | 18  |
| SMMPA14417 | 11 | 16 | 24 | 72  | 72  | 58  | 36  | 51  | 51  |
| SMMPA14418 | 27 | 24 | 17 | 81  | 71  | 56  | 40  | 48  | 38  |
| SMMPA14419 | 17 | 14 | 5  | 28  | 36  | 29  | 19  | 32  | 19  |
| SMMPA14420 | 22 | 20 | 20 | 493 | 480 | 466 | 194 | 260 | 229 |
| SMMPA14421 | 25 | 27 | 14 | 90  | 81  | 71  | 34  | 47  | 41  |
| SMMPA14422 | 12 | 16 | 15 | 45  | 37  | 20  | 23  | 16  | 19  |
| SMMPA14423 | 26 | 26 | 22 | 230 | 212 | 178 | 128 | 162 | 143 |
| SMMPA14424 | 9  | 20 | 16 | 119 | 101 | 65  | 35  | 57  | 57  |
| SMMPA14425 | 12 | 13 | 15 | 78  | 53  | 44  | 37  | 40  | 46  |
| SMMPA14426 | 6  | 13 | 13 | 32  | 25  | 21  | 20  | 34  | 25  |
| SMMPA14427 | 10 | 12 | 20 | 49  | 41  | 40  | 32  | 35  | 29  |
| SMMPA14428 | 8  | 5  | 8  | 15  | 11  | 9   | 5   | 17  | 10  |
| SMMPA14429 | 15 | 21 | 24 | 453 | 484 | 378 | 209 | 272 | 254 |
| SMMPA14430 | 16 | 11 | 22 | 42  | 29  | 31  | 28  | 25  | 31  |
| SMMPA14431 | 22 | 25 | 22 | 38  | 38  | 33  | 26  | 46  | 38  |
| SMMPA14432 | 29 | 30 | 24 | 52  | 36  | 45  | 33  | 44  | 45  |
| SMMPA14433 | 6  | 14 | 5  | 15  | 8   | 10  | 7   | 14  | 22  |
| SMMPA14434 | 18 | 18 | 18 | 120 | 95  | 81  | 53  | 67  | 61  |
| SMMPA14435 | 18 | 23 | 14 | 28  | 24  | 22  | 27  | 52  | 38  |

|            |    |     |    |     |     |     |     |     |     |
|------------|----|-----|----|-----|-----|-----|-----|-----|-----|
| SMMPA14436 | 21 | 5   | 10 | 50  | 39  | 39  | 20  | 34  | 32  |
| SMMPA14437 | 32 | 20  | 29 | 24  | 24  | 28  | 27  | 38  | 38  |
| SMMPA14438 | 27 | 31  | 26 | 39  | 36  | 45  | 34  | 41  | 49  |
| SMMPA14439 | 22 | 29  | 17 | 24  | 17  | 26  | 16  | 20  | 17  |
| SMMPA14440 | 84 | 106 | 81 | 37  | 43  | 48  | 59  | 84  | 88  |
| SMMPA14441 | 34 | 29  | 34 | 40  | 36  | 28  | 26  | 43  | 38  |
| SMMPA14442 | 19 | 14  | 15 | 17  | 25  | 29  | 23  | 27  | 42  |
| SMMPA14443 | 15 | 21  | 25 | 19  | 15  | 25  | 11  | 17  | 21  |
| SMMPA14444 | 21 | 13  | 24 | 18  | 22  | 17  | 24  | 37  | 37  |
| SMMPA14445 | 16 | 21  | 25 | 21  | 18  | 14  | 20  | 22  | 32  |
| SMMPA14446 | 24 | 38  | 24 | 71  | 55  | 46  | 48  | 52  | 43  |
| SMMPA14447 | 13 | 30  | 29 | 27  | 28  | 23  | 28  | 32  | 37  |
| SMMPA14448 | 14 | 22  | 5  | 23  | 16  | 19  | 21  | 27  | 16  |
| SMMPA14449 | 17 | 10  | 9  | 18  | 16  | 11  | 11  | 15  | 14  |
| SMMPA14450 | 15 | 14  | 6  | 15  | 10  | 9   | 12  | 14  | 10  |
| SMMPA14451 | 16 | 9   | 14 | 27  | 27  | 14  | 27  | 29  | 28  |
| SMMPA14452 | 20 | 12  | 15 | 79  | 75  | 55  | 45  | 57  | 61  |
| SMMPA14453 | 27 | 14  | 26 | 32  | 29  | 26  | 21  | 35  | 43  |
| SMMPA14454 | 17 | 18  | 16 | 105 | 131 | 92  | 50  | 72  | 76  |
| SMMPA14455 | 7  | 12  | 15 | 19  | 21  | 20  | 10  | 18  | 12  |
| SMMPA14456 | 13 | 9   | 13 | 79  | 79  | 70  | 27  | 50  | 28  |
| SMMPA14457 | 4  | 8   | 7  | 21  | 23  | 13  | 18  | 16  | 16  |
| SMMPA14458 | 12 | 20  | 11 | 12  | 12  | 2   | 8   | 12  | 14  |
| SMMPA14459 | 17 | 14  | 19 | 41  | 26  | 27  | 15  | 32  | 20  |
| SMMPA14460 | 17 | 9   | 14 | 5   | 13  | 9   | 24  | 25  | 20  |
| SMMPA14461 | 5  | 3   | 6  | 4   | 3   | 5   | 3   | 6   | 5   |
| SMMPA14462 | 11 | 11  | 5  | 11  | 7   | 6   | 10  | 8   | 8   |
| SMMPA14463 | 7  | 7   | 6  | 1   | 1   | 6   | 5   | 7   | 6   |
| SMMPA14464 | 9  | 12  | 7  | 3   | 6   | 10  | 10  | 16  | 12  |
| SMMPA14465 | 7  | 7   | 4  | 6   | 7   | 10  | 9   | 10  | 11  |
| SMMPA14466 | 19 | 20  | 14 | 28  | 31  | 19  | 18  | 26  | 28  |
| SMMPA14467 | 74 | 65  | 78 | 371 | 383 | 288 | 220 | 303 | 242 |
| SMMPA14468 | 8  | 5   | 5  | 59  | 66  | 51  | 28  | 40  | 36  |
| SMMPA14469 | 9  | 7   | 10 | 14  | 19  | 15  | 13  | 15  | 19  |
| SMMPA14470 | 23 | 23  | 13 | 179 | 149 | 141 | 66  | 82  | 69  |
| SMMPA14471 | 10 | 19  | 7  | 193 | 158 | 180 | 96  | 121 | 107 |
| SMMPA14472 | 10 | 10  | 10 | 57  | 54  | 43  | 31  | 20  | 35  |
| SMMPA14473 | 33 | 18  | 13 | 96  | 91  | 90  | 49  | 74  | 54  |
| SMMPA14474 | 21 | 17  | 25 | 64  | 51  | 48  | 42  | 51  | 47  |
| SMMPA14475 | 26 | 21  | 15 | 44  | 32  | 27  | 29  | 36  | 40  |
| SMMPA14476 | 13 | 14  | 11 | 35  | 22  | 23  | 16  | 29  | 20  |

|            |    |    |    |     |     |     |     |     |     |
|------------|----|----|----|-----|-----|-----|-----|-----|-----|
| SMMPA14477 | 21 | 9  | 11 | 55  | 56  | 41  | 44  | 53  | 56  |
| SMMPA14478 | 21 | 29 | 15 | 35  | 27  | 26  | 31  | 36  | 40  |
| SMMPA14479 | 90 | 93 | 69 | 112 | 125 | 106 | 154 | 170 | 187 |
| SMMPA14480 | 25 | 27 | 24 | 138 | 142 | 96  | 78  | 97  | 107 |
| SMMPA14481 | 17 | 12 | 8  | 65  | 53  | 44  | 48  | 54  | 48  |
| SMMPA14482 | 36 | 29 | 29 | 90  | 104 | 74  | 67  | 92  | 65  |
| SMMPA14483 | 10 | 13 | 12 | 39  | 27  | 19  | 14  | 24  | 26  |
| SMMPA14484 | 27 | 32 | 18 | 182 | 165 | 135 | 89  | 109 | 141 |
| SMMPA14485 | 31 | 34 | 15 | 188 | 186 | 145 | 96  | 136 | 129 |
| SMMPA14486 | 18 | 23 | 32 | 81  | 71  | 36  | 52  | 54  | 60  |
| SMMPA14487 | 23 | 21 | 27 | 186 | 184 | 163 | 78  | 117 | 127 |
| SMMPA14488 | 25 | 24 | 12 | 70  | 73  | 74  | 38  | 49  | 53  |
| SMMPA14489 | 15 | 12 | 12 | 107 | 91  | 88  | 49  | 80  | 74  |
| SMMPA14490 | 19 | 34 | 29 | 150 | 151 | 121 | 97  | 123 | 107 |
| SMMPA14491 | 18 | 16 | 18 | 142 | 144 | 109 | 69  | 105 | 73  |
| SMMPA14492 | 10 | 18 | 13 | 96  | 76  | 66  | 45  | 71  | 69  |
| SMMPA14493 | 18 | 22 | 21 | 39  | 31  | 41  | 33  | 32  | 46  |
| SMMPA14494 | 17 | 17 | 9  | 37  | 30  | 33  | 28  | 40  | 45  |
| SMMPA14495 | 3  | 5  | 5  | 7   | 3   | 8   | 4   | 4   | 5   |
| SMMPA14496 | 1  | 4  | 2  | 6   | 5   | 4   | 5   | 4   | 7   |
| SMMPA14497 | 12 | 10 | 6  | 24  | 23  | 13  | 17  | 20  | 10  |
| SMMPA14498 | 16 | 10 | 12 | 72  | 66  | 27  | 46  | 42  | 47  |
| SMMPA14499 | 23 | 13 | 13 | 82  | 65  | 51  | 42  | 63  | 44  |
| SMMPA14500 | 11 | 12 | 8  | 61  | 53  | 35  | 34  | 32  | 39  |
| SMMPA14501 | 14 | 12 | 20 | 20  | 17  | 18  | 17  | 19  | 20  |
| SMMPA14502 | 27 | 29 | 19 | 105 | 95  | 98  | 64  | 84  | 83  |
| SMMPA14503 | 16 | 22 | 15 | 42  | 33  | 25  | 25  | 37  | 27  |
| SMMPA14504 | 39 | 29 | 26 | 28  | 22  | 30  | 43  | 60  | 65  |
| SMMPA14505 | 28 | 45 | 29 | 52  | 45  | 52  | 53  | 56  | 57  |
| SMMPA14506 | 6  | 2  | 11 | 10  | 10  | 16  | 2   | 7   | 9   |
| SMMPA14507 | 24 | 32 | 24 | 22  | 27  | 27  | 21  | 47  | 46  |
| SMMPA14508 | 27 | 31 | 20 | 41  | 45  | 31  | 26  | 49  | 62  |
| SMMPA14509 | 24 | 18 | 17 | 54  | 49  | 28  | 38  | 50  | 56  |
| SMMPA14510 | 14 | 23 | 16 | 37  | 47  | 31  | 35  | 51  | 41  |
| SMMPA14511 | 12 | 13 | 6  | 43  | 28  | 25  | 18  | 24  | 20  |
| SMMPA14512 | 13 | 18 | 8  | 24  | 24  | 33  | 10  | 24  | 23  |
| SMMPA14513 | 21 | 17 | 18 | 188 | 179 | 148 | 85  | 119 | 103 |
| SMMPA14514 | 10 | 20 | 10 | 46  | 40  | 38  | 23  | 27  | 23  |
| SMMPA14515 | 13 | 17 | 10 | 75  | 80  | 70  | 47  | 41  | 50  |
| SMMPA14516 | 19 | 17 | 17 | 57  | 47  | 35  | 39  | 46  | 54  |
| SMMPA14517 | 12 | 11 | 12 | 135 | 114 | 108 | 67  | 89  | 82  |

|            |    |    |    |     |     |     |     |     |     |
|------------|----|----|----|-----|-----|-----|-----|-----|-----|
| SMMPA14518 | 20 | 15 | 19 | 119 | 111 | 99  | 68  | 86  | 82  |
| SMMPA14519 | 13 | 12 | 8  | 71  | 55  | 33  | 46  | 56  | 40  |
| SMMPA14520 | 20 | 23 | 18 | 102 | 82  | 67  | 51  | 59  | 55  |
| SMMPA14521 | 6  | 7  | 6  | 30  | 30  | 37  | 24  | 29  | 25  |
| SMMPA14522 | 27 | 33 | 33 | 435 | 393 | 275 | 246 | 311 | 242 |
| SMMPA14523 | 5  | 5  | 5  | 5   | 10  | 8   | 11  | 9   | 12  |
| SMMPA14524 | 23 | 25 | 20 | 357 | 325 | 316 | 171 | 242 | 190 |
| SMMPA14525 | 15 | 14 | 15 | 78  | 83  | 71  | 33  | 44  | 39  |
| SMMPA14526 | 6  | 10 | 11 | 34  | 27  | 23  | 13  | 24  | 26  |
| SMMPA14527 | 12 | 13 | 14 | 38  | 36  | 26  | 18  | 27  | 15  |
| SMMPA14528 | 30 | 46 | 26 | 45  | 48  | 45  | 44  | 39  | 49  |
| SMMPA14529 | 15 | 20 | 16 | 23  | 24  | 22  | 31  | 25  | 33  |
| SMMPA14530 | 6  | 9  | 8  | 48  | 34  | 37  | 22  | 21  | 26  |
| SMMPA14531 | 49 | 45 | 42 | 50  | 55  | 43  | 62  | 84  | 65  |
| SMMPA14532 | 16 | 14 | 19 | 51  | 35  | 39  | 16  | 24  | 26  |
| SMMPA14533 | 19 | 17 | 18 | 19  | 21  | 24  | 15  | 25  | 20  |
| SMMPA14534 | 17 | 28 | 22 | 16  | 14  | 14  | 30  | 34  | 38  |
| SMMPA14535 | 27 | 28 | 24 | 48  | 46  | 52  | 46  | 46  | 37  |
| SMMPA14536 | 31 | 35 | 25 | 34  | 31  | 21  | 45  | 52  | 57  |
| SMMPA14537 | 24 | 20 | 13 | 33  | 29  | 31  | 41  | 39  | 41  |
| SMMPA14538 | 22 | 28 | 20 | 129 | 107 | 100 | 68  | 90  | 85  |
| SMMPA14539 | 18 | 24 | 18 | 12  | 13  | 8   | 23  | 29  | 26  |
| SMMPA14540 | 24 | 24 | 27 | 42  | 30  | 23  | 28  | 38  | 31  |
| SMMPA14541 | 16 | 12 | 17 | 131 | 96  | 95  | 53  | 86  | 68  |
| SMMPA14542 | 31 | 28 | 21 | 132 | 106 | 84  | 59  | 62  | 57  |
| SMMPA14543 | 15 | 12 | 21 | 31  | 14  | 24  | 20  | 27  | 29  |
| SMMPA14544 | 12 | 25 | 19 | 122 | 99  | 86  | 53  | 82  | 60  |
| SMMPA14545 | 8  | 12 | 10 | 55  | 51  | 52  | 13  | 15  | 22  |
| SMMPA14546 | 18 | 20 | 18 | 109 | 103 | 79  | 62  | 77  | 83  |
| SMMPA14547 | 66 | 56 | 41 | 143 | 131 | 106 | 72  | 105 | 83  |
| SMMPA14548 | 32 | 34 | 37 | 375 | 345 | 296 | 176 | 236 | 210 |
| SMMPA14549 | 12 | 13 | 5  | 68  | 60  | 51  | 22  | 29  | 28  |
| SMMPA14550 | 25 | 31 | 12 | 40  | 39  | 42  | 21  | 38  | 32  |
| SMMPA14551 | 22 | 13 | 24 | 53  | 41  | 41  | 39  | 52  | 30  |
| SMMPA14552 | 26 | 33 | 25 | 210 | 218 | 174 | 81  | 113 | 96  |
| SMMPA14553 | 48 | 51 | 45 | 698 | 640 | 566 | 334 | 388 | 377 |
| SMMPA14554 | 13 | 14 | 19 | 29  | 25  | 23  | 21  | 31  | 21  |
| SMMPA14555 | 89 | 89 | 80 | 52  | 41  | 45  | 65  | 93  | 103 |
| SMMPA14556 | 27 | 19 | 21 | 273 | 303 | 260 | 145 | 177 | 150 |
| SMMPA14557 | 33 | 30 | 32 | 57  | 48  | 60  | 50  | 60  | 53  |
| SMMPA14558 | 20 | 13 | 18 | 197 | 195 | 157 | 96  | 118 | 109 |

|            |     |     |     |     |     |     |     |     |     |
|------------|-----|-----|-----|-----|-----|-----|-----|-----|-----|
| SMMPA14559 | 24  | 25  | 18  | 420 | 350 | 299 | 221 | 294 | 255 |
| SMMPA14560 | 22  | 36  | 29  | 174 | 143 | 114 | 78  | 101 | 95  |
| SMMPA14561 | 25  | 30  | 23  | 60  | 56  | 45  | 38  | 63  | 60  |
| SMMPA14562 | 24  | 31  | 20  | 123 | 109 | 71  | 89  | 127 | 127 |
| SMMPA14563 | 12  | 19  | 8   | 55  | 58  | 36  | 32  | 62  | 59  |
| SMMPA14564 | 41  | 34  | 26  | 292 | 303 | 279 | 163 | 229 | 233 |
| SMMPA14565 | 21  | 24  | 23  | 173 | 165 | 131 | 71  | 127 | 125 |
| SMMPA14566 | 24  | 14  | 14  | 61  | 58  | 33  | 46  | 43  | 33  |
| SMMPA14567 | 15  | 23  | 21  | 97  | 86  | 62  | 31  | 46  | 36  |
| SMMPA14568 | 21  | 13  | 10  | 105 | 84  | 71  | 57  | 61  | 62  |
| SMMPA14569 | 15  | 15  | 13  | 16  | 11  | 11  | 22  | 30  | 34  |
| SMMPA14570 | 27  | 23  | 31  | 86  | 82  | 76  | 46  | 54  | 52  |
| SMMPA14571 | 12  | 8   | 12  | 18  | 22  | 14  | 20  | 23  | 29  |
| SMMPA14572 | 7   | 6   | 15  | 12  | 22  | 15  | 11  | 14  | 19  |
| SMMPA14573 | 2   | 3   | 8   | 0   | 1   | 0   | 1   | 3   | 2   |
| SMMPA14574 | 8   | 12  | 8   | 18  | 12  | 8   | 17  | 16  | 20  |
| SMMPA14575 | 19  | 16  | 10  | 22  | 21  | 16  | 12  | 29  | 21  |
| SMMPA14576 | 14  | 23  | 10  | 42  | 35  | 24  | 28  | 33  | 35  |
| SMMPA14577 | 20  | 38  | 30  | 52  | 61  | 54  | 50  | 74  | 82  |
| SMMPA14578 | 29  | 33  | 26  | 63  | 62  | 53  | 36  | 54  | 56  |
| SMMPA14579 | 11  | 14  | 22  | 45  | 28  | 26  | 25  | 27  | 43  |
| SMMPA14580 | 21  | 25  | 15  | 130 | 123 | 100 | 89  | 105 | 89  |
| SMMPA14581 | 6   | 16  | 10  | 15  | 20  | 15  | 12  | 16  | 18  |
| SMMPA14582 | 19  | 20  | 24  | 18  | 19  | 23  | 25  | 29  | 17  |
| SMMPA14583 | 16  | 17  | 17  | 56  | 36  | 32  | 38  | 41  | 35  |
| SMMPA14584 | 17  | 13  | 19  | 85  | 91  | 52  | 38  | 51  | 69  |
| SMMPA14585 | 24  | 25  | 17  | 53  | 39  | 40  | 28  | 43  | 28  |
| SMMPA14586 | 32  | 24  | 15  | 48  | 44  | 29  | 42  | 36  | 41  |
| SMMPA14587 | 13  | 9   | 11  | 7   | 6   | 6   | 6   | 12  | 11  |
| SMMPA14588 | 29  | 25  | 26  | 25  | 28  | 23  | 25  | 29  | 35  |
| SMMPA14589 | 13  | 16  | 15  | 35  | 38  | 32  | 28  | 20  | 32  |
| SMMPA14590 | 9   | 8   | 11  | 18  | 18  | 17  | 13  | 27  | 32  |
| SMMPA14591 | 26  | 31  | 23  | 93  | 81  | 55  | 62  | 65  | 72  |
| SMMPA14592 | 23  | 19  | 15  | 40  | 30  | 32  | 25  | 45  | 31  |
| SMMPA14593 | 14  | 16  | 10  | 101 | 94  | 70  | 39  | 58  | 56  |
| SMMPA14594 | 122 | 132 | 108 | 72  | 67  | 68  | 106 | 122 | 118 |
| SMMPA14595 | 24  | 39  | 29  | 68  | 53  | 61  | 35  | 51  | 48  |
| SMMPA14596 | 27  | 37  | 37  | 62  | 50  | 38  | 49  | 57  | 61  |
| SMMPA14597 | 18  | 16  | 14  | 34  | 32  | 30  | 22  | 38  | 42  |
| SMMPA14598 | 39  | 28  | 33  | 104 | 99  | 78  | 98  | 95  | 77  |
| SMMPA14599 | 29  | 30  | 23  | 41  | 33  | 25  | 53  | 48  | 60  |

|            |    |    |    |     |     |     |     |     |     |
|------------|----|----|----|-----|-----|-----|-----|-----|-----|
| SMMPA14600 | 36 | 24 | 25 | 414 | 387 | 319 | 182 | 265 | 255 |
| SMMPA14601 | 19 | 25 | 29 | 69  | 56  | 45  | 47  | 60  | 70  |
| SMMPA14602 | 53 | 65 | 49 | 132 | 105 | 84  | 84  | 118 | 129 |
| SMMPA14603 | 51 | 51 | 56 | 79  | 77  | 47  | 67  | 100 | 96  |
| SMMPA14604 | 27 | 37 | 21 | 37  | 30  | 31  | 41  | 43  | 47  |
| SMMPA14605 | 46 | 61 | 55 | 68  | 61  | 49  | 67  | 60  | 74  |
| SMMPA14606 | 25 | 28 | 29 | 32  | 20  | 30  | 30  | 27  | 32  |
| SMMPA14607 | 46 | 41 | 35 | 214 | 194 | 137 | 85  | 121 | 121 |
| SMMPA14608 | 12 | 19 | 8  | 18  | 11  | 13  | 10  | 24  | 18  |
| SMMPA14609 | 32 | 29 | 32 | 25  | 34  | 22  | 32  | 46  | 41  |
| SMMPA14610 | 16 | 24 | 19 | 62  | 64  | 38  | 34  | 49  | 41  |
| SMMPA14611 | 31 | 43 | 25 | 60  | 55  | 63  | 39  | 57  | 59  |
| SMMPA14612 | 27 | 28 | 16 | 64  | 55  | 35  | 38  | 60  | 31  |
| SMMPA14613 | 4  | 5  | 1  | 11  | 12  | 8   | 7   | 9   | 6   |
| SMMPA14614 | 3  | 8  | 4  | 6   | 5   | 7   | 7   | 13  | 15  |
| SMMPA14615 | 17 | 25 | 18 | 38  | 37  | 24  | 42  | 50  | 42  |
| SMMPA14616 | 28 | 38 | 27 | 26  | 19  | 18  | 31  | 44  | 36  |
| SMMPA14617 | 25 | 24 | 22 | 37  | 33  | 27  | 41  | 55  | 55  |
| SMMPA14618 | 79 | 87 | 52 | 91  | 97  | 87  | 95  | 122 | 128 |
| SMMPA14619 | 24 | 26 | 19 | 24  | 24  | 23  | 35  | 60  | 51  |
| SMMPA14620 | 15 | 14 | 24 | 20  | 17  | 12  | 26  | 25  | 24  |
| SMMPA14621 | 18 | 14 | 20 | 9   | 5   | 10  | 17  | 28  | 32  |
| SMMPA14622 | 36 | 61 | 34 | 39  | 33  | 42  | 40  | 58  | 49  |
| SMMPA14623 | 21 | 24 | 29 | 53  | 37  | 38  | 32  | 39  | 45  |
| SMMPA14624 | 20 | 14 | 11 | 24  | 19  | 20  | 20  | 28  | 28  |
| SMMPA14625 | 19 | 11 | 14 | 40  | 53  | 42  | 25  | 34  | 47  |
| SMMPA14626 | 46 | 38 | 26 | 63  | 44  | 41  | 52  | 56  | 51  |
| SMMPA14627 | 20 | 21 | 15 | 13  | 11  | 10  | 23  | 26  | 37  |
| SMMPA14628 | 52 | 46 | 36 | 60  | 44  | 34  | 48  | 69  | 56  |
| SMMPA14629 | 13 | 24 | 20 | 18  | 22  | 21  | 18  | 12  | 17  |
| SMMPA14630 | 65 | 55 | 60 | 75  | 53  | 48  | 42  | 56  | 63  |
| SMMPA14631 | 21 | 20 | 11 | 26  | 30  | 26  | 27  | 31  | 32  |
| SMMPA14632 | 37 | 36 | 28 | 38  | 40  | 30  | 44  | 46  | 53  |
| SMMPA14633 | 14 | 11 | 19 | 21  | 27  | 14  | 11  | 32  | 32  |
| SMMPA14634 | 30 | 29 | 18 | 24  | 38  | 28  | 37  | 39  | 45  |
| SMMPA14635 | 10 | 9  | 8  | 14  | 10  | 9   | 16  | 18  | 23  |
| SMMPA14636 | 50 | 59 | 52 | 58  | 50  | 54  | 81  | 108 | 103 |
| SMMPA14637 | 24 | 30 | 17 | 20  | 20  | 18  | 17  | 40  | 28  |
| SMMPA14638 | 18 | 22 | 18 | 28  | 21  | 26  | 16  | 20  | 22  |
| SMMPA14639 | 11 | 10 | 6  | 123 | 146 | 108 | 37  | 34  | 29  |
| SMMPA14640 | 4  | 9  | 1  | 15  | 27  | 22  | 10  | 12  | 10  |

|            |    |    |    |     |     |     |     |     |     |
|------------|----|----|----|-----|-----|-----|-----|-----|-----|
| SMMPA14641 | 15 | 12 | 28 | 289 | 289 | 248 | 92  | 152 | 106 |
| SMMPA14642 | 17 | 18 | 11 | 66  | 104 | 91  | 34  | 44  | 24  |
| SMMPA14643 | 18 | 21 | 15 | 49  | 62  | 38  | 27  | 40  | 43  |
| SMMPA14644 | 8  | 17 | 14 | 55  | 63  | 65  | 28  | 31  | 29  |
| SMMPA14645 | 20 | 24 | 28 | 54  | 44  | 40  | 46  | 48  | 47  |
| SMMPA14646 | 32 | 38 | 35 | 146 | 138 | 107 | 111 | 115 | 110 |
| SMMPA14647 | 33 | 54 | 43 | 56  | 41  | 41  | 41  | 62  | 61  |
| SMMPA14648 | 44 | 26 | 42 | 602 | 587 | 522 | 284 | 366 | 285 |
| SMMPA14649 | 12 | 27 | 20 | 50  | 29  | 43  | 36  | 42  | 54  |
| SMMPA14650 | 23 | 36 | 27 | 60  | 43  | 45  | 50  | 45  | 65  |
| SMMPA14651 | 40 | 47 | 34 | 42  | 57  | 38  | 54  | 69  | 63  |
| SMMPA14652 | 39 | 43 | 34 | 159 | 146 | 120 | 89  | 121 | 107 |
| SMMPA14653 | 20 | 29 | 19 | 36  | 45  | 30  | 46  | 56  | 64  |
| SMMPA14654 | 22 | 25 | 33 | 59  | 54  | 38  | 39  | 43  | 59  |
| SMMPA14655 | 38 | 36 | 37 | 105 | 97  | 90  | 74  | 107 | 84  |
| SMMPA14656 | 28 | 22 | 12 | 108 | 77  | 65  | 50  | 74  | 62  |
| SMMPA14657 | 7  | 14 | 12 | 46  | 46  | 42  | 38  | 51  | 32  |
| SMMPA14658 | 34 | 16 | 27 | 41  | 28  | 23  | 29  | 35  | 50  |
| SMMPA14659 | 50 | 35 | 40 | 52  | 54  | 48  | 54  | 61  | 64  |
| SMMPA14660 | 27 | 25 | 22 | 81  | 47  | 48  | 66  | 72  | 70  |
| SMMPA14661 | 30 | 37 | 22 | 49  | 51  | 41  | 34  | 67  | 59  |
| SMMPA14662 | 14 | 13 | 20 | 15  | 15  | 19  | 18  | 36  | 24  |
| SMMPA14663 | 13 | 13 | 15 | 15  | 22  | 14  | 28  | 28  | 26  |
| SMMPA14664 | 21 | 20 | 23 | 24  | 22  | 22  | 28  | 52  | 37  |
| SMMPA14665 | 5  | 5  | 7  | 6   | 11  | 12  | 14  | 13  | 17  |
| SMMPA14666 | 8  | 15 | 10 | 15  | 15  | 23  | 16  | 25  | 30  |
| SMMPA14667 | 15 | 10 | 17 | 11  | 22  | 20  | 26  | 31  | 27  |
| SMMPA14668 | 7  | 10 | 9  | 12  | 19  | 15  | 15  | 18  | 23  |
| SMMPA14669 | 16 | 12 | 11 | 76  | 70  | 83  | 33  | 44  | 40  |
| SMMPA14670 | 23 | 33 | 32 | 55  | 37  | 35  | 37  | 44  | 43  |
| SMMPA14671 | 24 | 25 | 27 | 29  | 26  | 26  | 63  | 70  | 81  |
| SMMPA14672 | 16 | 24 | 24 | 84  | 105 | 73  | 46  | 51  | 56  |
| SMMPA14673 | 21 | 24 | 18 | 56  | 71  | 54  | 39  | 42  | 54  |
| SMMPA14674 | 64 | 59 | 67 | 53  | 54  | 44  | 53  | 65  | 55  |
| SMMPA14675 | 20 | 22 | 19 | 25  | 33  | 29  | 17  | 35  | 26  |
| SMMPA14676 | 29 | 35 | 19 | 65  | 92  | 67  | 42  | 53  | 45  |
| SMMPA14677 | 27 | 29 | 27 | 100 | 78  | 52  | 50  | 74  | 62  |
| SMMPA14678 | 16 | 15 | 16 | 27  | 21  | 20  | 21  | 22  | 30  |
| SMMPA14679 | 7  | 8  | 6  | 22  | 20  | 16  | 13  | 15  | 12  |
| SMMPA14680 | 25 | 24 | 24 | 32  | 20  | 21  | 21  | 45  | 49  |
| SMMPA14681 | 25 | 19 | 28 | 51  | 50  | 49  | 56  | 62  | 64  |

|            |    |    |    |     |     |     |     |     |     |
|------------|----|----|----|-----|-----|-----|-----|-----|-----|
| SMMPA14682 | 36 | 27 | 16 | 48  | 35  | 53  | 36  | 44  | 47  |
| SMMPA14683 | 21 | 20 | 16 | 157 | 115 | 100 | 72  | 112 | 99  |
| SMMPA14684 | 24 | 26 | 21 | 35  | 43  | 30  | 32  | 39  | 36  |
| SMMPA14685 | 21 | 10 | 18 | 33  | 27  | 23  | 21  | 26  | 16  |
| SMMPA14686 | 16 | 26 | 12 | 26  | 21  | 27  | 22  | 29  | 34  |
| SMMPA14687 | 9  | 10 | 9  | 48  | 50  | 42  | 34  | 50  | 43  |
| SMMPA14688 | 20 | 18 | 18 | 99  | 90  | 71  | 57  | 58  | 77  |
| SMMPA14689 | 19 | 15 | 12 | 38  | 28  | 35  | 20  | 22  | 22  |
| SMMPA14690 | 30 | 17 | 10 | 89  | 76  | 58  | 49  | 68  | 50  |
| SMMPA14691 | 13 | 11 | 19 | 92  | 89  | 58  | 32  | 54  | 70  |
| SMMPA14692 | 10 | 10 | 16 | 91  | 69  | 56  | 56  | 50  | 37  |
| SMMPA14693 | 24 | 22 | 17 | 93  | 77  | 69  | 39  | 45  | 66  |
| SMMPA14694 | 22 | 25 | 20 | 121 | 123 | 100 | 59  | 92  | 78  |
| SMMPA14695 | 19 | 16 | 16 | 82  | 53  | 50  | 37  | 51  | 42  |
| SMMPA14696 | 25 | 27 | 22 | 285 | 281 | 178 | 150 | 171 | 174 |
| SMMPA14697 | 23 | 24 | 21 | 40  | 47  | 44  | 42  | 40  | 35  |
| SMMPA14698 | 16 | 15 | 15 | 42  | 37  | 44  | 23  | 20  | 30  |
| SMMPA14699 | 12 | 17 | 6  | 66  | 49  | 27  | 42  | 58  | 44  |
| SMMPA14700 | 14 | 12 | 16 | 28  | 10  | 13  | 27  | 27  | 34  |
| SMMPA14701 | 16 | 12 | 12 | 20  | 21  | 19  | 14  | 34  | 27  |
| SMMPA14702 | 8  | 9  | 3  | 7   | 7   | 9   | 10  | 7   | 8   |
| SMMPA14703 | 3  | 10 | 6  | 15  | 12  | 10  | 12  | 10  | 12  |
| SMMPA14704 | 14 | 12 | 10 | 71  | 52  | 44  | 24  | 39  | 29  |
| SMMPA14705 | 6  | 15 | 7  | 37  | 42  | 39  | 25  | 36  | 22  |
| SMMPA14706 | 11 | 13 | 13 | 33  | 37  | 29  | 26  | 35  | 25  |
| SMMPA14707 | 36 | 40 | 33 | 34  | 36  | 25  | 33  | 50  | 32  |
| SMMPA14708 | 19 | 21 | 14 | 28  | 20  | 21  | 26  | 30  | 28  |
| SMMPA14709 | 7  | 17 | 7  | 27  | 19  | 20  | 18  | 25  | 19  |
| SMMPA14710 | 13 | 17 | 12 | 24  | 18  | 16  | 16  | 19  | 19  |
| SMMPA14711 | 25 | 21 | 15 | 33  | 24  | 19  | 20  | 32  | 38  |
| SMMPA14712 | 17 | 23 | 19 | 11  | 12  | 17  | 20  | 29  | 20  |
| SMMPA14713 | 12 | 18 | 8  | 13  | 9   | 6   | 12  | 24  | 19  |
| SMMPA14714 | 34 | 34 | 35 | 47  | 46  | 41  | 47  | 46  | 53  |
| SMMPA14715 | 32 | 45 | 34 | 37  | 42  | 30  | 39  | 68  | 56  |
| SMMPA14716 | 30 | 28 | 20 | 84  | 61  | 56  | 79  | 88  | 89  |
| SMMPA14717 | 19 | 32 | 20 | 770 | 741 | 736 | 718 | 885 | 792 |
| SMMPA14718 | 42 | 33 | 31 | 597 | 555 | 449 | 432 | 588 | 512 |
| SMMPA14719 | 4  | 0  | 1  | 28  | 37  | 36  | 32  | 42  | 39  |
| SMMPA14720 | 12 | 21 | 19 | 183 | 180 | 151 | 81  | 85  | 75  |
| SMMPA14721 | 17 | 22 | 19 | 46  | 42  | 43  | 25  | 48  | 38  |
| SMMPA14722 | 14 | 14 | 8  | 79  | 65  | 43  | 42  | 31  | 37  |



|            |    |    |    |     |     |     |    |     |     |
|------------|----|----|----|-----|-----|-----|----|-----|-----|
| SMMPA14723 | 13 | 19 | 10 | 194 | 193 | 159 | 96 | 120 | 93  |
| SMMPA14724 | 16 | 18 | 11 | 145 | 137 | 122 | 79 | 105 | 88  |
| SMMPA14725 | 4  | 3  | 3  | 1   | 0   | 0   | 4  | 4   | 2   |
| SMMPA14726 | 14 | 12 | 13 | 89  | 78  | 55  | 35 | 56  | 48  |
| SMMPA14727 | 23 | 21 | 15 | 127 | 135 | 88  | 86 | 78  | 84  |
| SMMPA14728 | 39 | 24 | 33 | 45  | 44  | 38  | 44 | 50  | 77  |
| SMMPA14729 | 20 | 13 | 16 | 14  | 16  | 13  | 35 | 27  | 46  |
| SMMPA14730 | 20 | 21 | 24 | 38  | 29  | 37  | 22 | 48  | 28  |
| SMMPA14731 | 40 | 45 | 35 | 62  | 46  | 54  | 56 | 68  | 78  |
| SMMPA14732 | 7  | 7  | 13 | 11  | 12  | 9   | 15 | 16  | 17  |
| SMMPA14733 | 15 | 9  | 9  | 10  | 15  | 12  | 8  | 23  | 22  |
| SMMPA14734 | 20 | 28 | 33 | 52  | 56  | 43  | 35 | 46  | 32  |
| SMMPA14735 | 19 | 21 | 20 | 76  | 66  | 61  | 65 | 68  | 59  |
| SMMPA14736 | 7  | 8  | 16 | 19  | 23  | 20  | 5  | 20  | 17  |
| SMMPA14737 | 6  | 2  | 6  | 1   | 6   | 5   | 0  | 5   | 6   |
| SMMPA14738 | 3  | 7  | 3  | 2   | 10  | 11  | 0  | 3   | 5   |
| SMMPA14739 | 34 | 52 | 33 | 77  | 66  | 50  | 36 | 43  | 45  |
| SMMPA14740 | 12 | 15 | 12 | 49  | 50  | 45  | 25 | 25  | 32  |
| SMMPA14741 | 3  | 4  | 1  | 6   | 4   | 8   | 3  | 9   | 8   |
| SMMPA14742 | 10 | 14 | 10 | 29  | 22  | 22  | 12 | 16  | 21  |
| SMMPA14743 | 33 | 19 | 21 | 52  | 42  | 19  | 30 | 41  | 34  |
| SMMPA14744 | 1  | 5  | 0  | 2   | 5   | 5   | 5  | 4   | 4   |
| SMMPA14745 | 28 | 22 | 28 | 165 | 196 | 167 | 67 | 92  | 81  |
| SMMPA14746 | 2  | 2  | 3  | 15  | 6   | 7   | 3  | 4   | 3   |
| SMMPA14747 | 15 | 18 | 12 | 91  | 85  | 78  | 55 | 63  | 73  |
| SMMPA14748 | 3  | 9  | 5  | 35  | 27  | 22  | 15 | 25  | 13  |
| SMMPA14749 | 12 | 13 | 8  | 96  | 98  | 88  | 36 | 44  | 39  |
| SMMPA14750 | 9  | 7  | 8  | 5   | 8   | 13  | 5  | 8   | 10  |
| SMMPA14751 | 20 | 20 | 19 | 45  | 50  | 32  | 22 | 43  | 47  |
| SMMPA14752 | 21 | 29 | 15 | 56  | 51  | 31  | 46 | 64  | 48  |
| SMMPA14753 | 23 | 33 | 32 | 42  | 37  | 18  | 46 | 44  | 52  |
| SMMPA14754 | 10 | 13 | 18 | 164 | 183 | 111 | 87 | 117 | 125 |
| SMMPA14755 | 19 | 12 | 13 | 46  | 35  | 37  | 32 | 40  | 38  |
| SMMPA14756 | 20 | 37 | 18 | 80  | 68  | 58  | 30 | 28  | 39  |
| SMMPA14757 | 23 | 12 | 13 | 93  | 83  | 74  | 40 | 35  | 46  |
| SMMPA14758 | 37 | 42 | 38 | 47  | 44  | 50  | 41 | 45  | 37  |
| SMMPA14759 | 21 | 18 | 19 | 18  | 26  | 29  | 16 | 19  | 18  |
| SMMPA14760 | 37 | 39 | 29 | 38  | 39  | 55  | 32 | 24  | 35  |
| SMMPA14761 | 24 | 26 | 19 | 97  | 96  | 80  | 89 | 117 | 121 |
| SMMPA14762 | 26 | 22 | 30 | 93  | 70  | 48  | 70 | 74  | 67  |
| SMMPA14763 | 23 | 34 | 30 | 55  | 48  | 51  | 53 | 73  | 70  |

|            |    |    |    |     |     |     |     |     |     |
|------------|----|----|----|-----|-----|-----|-----|-----|-----|
| SMMPA14764 | 20 | 22 | 26 | 205 | 190 | 158 | 93  | 111 | 88  |
| SMMPA14765 | 49 | 72 | 48 | 62  | 41  | 53  | 71  | 85  | 88  |
| SMMPA14766 | 61 | 47 | 53 | 44  | 52  | 55  | 41  | 64  | 58  |
| SMMPA14767 | 26 | 30 | 30 | 65  | 46  | 44  | 44  | 87  | 64  |
| SMMPA14768 | 14 | 16 | 19 | 19  | 17  | 20  | 13  | 22  | 30  |
| SMMPA14769 | 12 | 21 | 16 | 15  | 16  | 6   | 16  | 13  | 17  |
| SMMPA14770 | 31 | 27 | 13 | 26  | 45  | 28  | 29  | 31  | 39  |
| SMMPA14771 | 50 | 46 | 32 | 63  | 92  | 69  | 51  | 78  | 71  |
| SMMPA14772 | 41 | 29 | 25 | 261 | 230 | 198 | 115 | 158 | 145 |
| SMMPA14773 | 21 | 28 | 16 | 114 | 93  | 86  | 57  | 64  | 59  |
| SMMPA14774 | 20 | 30 | 16 | 102 | 108 | 86  | 57  | 53  | 53  |
| SMMPA14775 | 17 | 25 | 21 | 258 | 258 | 226 | 66  | 110 | 85  |
| SMMPA14776 | 17 | 28 | 24 | 140 | 137 | 114 | 55  | 91  | 66  |
| SMMPA14777 | 17 | 12 | 11 | 82  | 100 | 88  | 28  | 40  | 33  |
| SMMPA14778 | 29 | 31 | 15 | 138 | 94  | 125 | 69  | 83  | 82  |
| SMMPA14779 | 39 | 32 | 31 | 497 | 481 | 426 | 166 | 193 | 160 |
| SMMPA14780 | 21 | 15 | 19 | 245 | 195 | 149 | 89  | 141 | 124 |
| SMMPA14781 | 17 | 14 | 15 | 31  | 33  | 25  | 23  | 21  | 28  |
| SMMPA14782 | 8  | 10 | 5  | 78  | 62  | 59  | 17  | 32  | 20  |
| SMMPA14783 | 3  | 3  | 4  | 30  | 27  | 15  | 11  | 14  | 11  |
| SMMPA14784 | 28 | 24 | 22 | 41  | 42  | 56  | 32  | 47  | 33  |
| SMMPA14785 | 16 | 15 | 11 | 23  | 25  | 40  | 28  | 37  | 25  |
| SMMPA14786 | 31 | 39 | 31 | 78  | 76  | 68  | 33  | 63  | 60  |
| SMMPA14787 | 16 | 17 | 23 | 32  | 46  | 31  | 26  | 34  | 28  |
| SMMPA14788 | 5  | 6  | 6  | 16  | 15  | 11  | 16  | 8   | 9   |
| SMMPA14789 | 17 | 20 | 13 | 39  | 33  | 26  | 24  | 27  | 30  |
| SMMPA14790 | 20 | 13 | 19 | 96  | 113 | 92  | 60  | 79  | 75  |
| SMMPA14791 | 26 | 30 | 16 | 115 | 139 | 100 | 65  | 105 | 83  |
| SMMPA14792 | 22 | 31 | 17 | 60  | 76  | 51  | 49  | 62  | 54  |
| SMMPA14793 | 17 | 29 | 14 | 77  | 56  | 55  | 37  | 55  | 60  |
| SMMPA14794 | 17 | 16 | 6  | 75  | 83  | 77  | 46  | 43  | 54  |
| SMMPA14795 | 12 | 16 | 27 | 67  | 44  | 47  | 34  | 44  | 43  |
| SMMPA14796 | 16 | 16 | 14 | 52  | 72  | 51  | 51  | 58  | 53  |
| SMMPA14797 | 30 | 23 | 21 | 57  | 52  | 45  | 25  | 42  | 34  |
| SMMPA14798 | 10 | 11 | 20 | 50  | 47  | 49  | 34  | 47  | 52  |
| SMMPA14799 | 7  | 12 | 12 | 97  | 72  | 80  | 53  | 70  | 63  |
| SMMPA14800 | 14 | 16 | 7  | 55  | 38  | 28  | 22  | 33  | 23  |
| SMMPA14801 | 19 | 20 | 15 | 290 | 251 | 224 | 125 | 180 | 162 |
| SMMPA14802 | 15 | 6  | 9  | 24  | 11  | 16  | 18  | 22  | 18  |
| SMMPA14803 | 15 | 8  | 13 | 73  | 74  | 47  | 40  | 55  | 50  |
| SMMPA14804 | 20 | 13 | 21 | 64  | 45  | 39  | 34  | 57  | 60  |

|            |    |    |    |     |     |     |    |     |    |
|------------|----|----|----|-----|-----|-----|----|-----|----|
| SMMPA14805 | 3  | 4  | 3  | 16  | 10  | 11  | 12 | 13  | 9  |
| SMMPA14806 | 6  | 8  | 14 | 128 | 101 | 86  | 57 | 75  | 61 |
| SMMPA14807 | 48 | 40 | 42 | 172 | 159 | 163 | 52 | 62  | 59 |
| SMMPA14808 | 8  | 8  | 8  | 55  | 40  | 36  | 10 | 26  | 20 |
| SMMPA14809 | 8  | 13 | 5  | 30  | 38  | 16  | 15 | 21  | 21 |
| SMMPA14810 | 17 | 30 | 29 | 35  | 49  | 34  | 40 | 36  | 45 |
| SMMPA14811 | 21 | 19 | 17 | 19  | 30  | 31  | 26 | 35  | 35 |
| SMMPA14812 | 38 | 31 | 35 | 83  | 71  | 83  | 54 | 59  | 59 |
| SMMPA14813 | 32 | 26 | 27 | 70  | 62  | 61  | 55 | 46  | 53 |
| SMMPA14814 | 16 | 28 | 20 | 131 | 134 | 90  | 58 | 75  | 79 |
| SMMPA14815 | 7  | 9  | 15 | 17  | 18  | 22  | 15 | 17  | 13 |
| SMMPA14816 | 2  | 7  | 7  | 34  | 34  | 32  | 14 | 24  | 23 |
| SMMPA14817 | 25 | 33 | 19 | 36  | 27  | 33  | 36 | 31  | 42 |
| SMMPA14818 | 31 | 44 | 37 | 29  | 28  | 18  | 32 | 40  | 40 |
| SMMPA14819 | 27 | 33 | 40 | 38  | 48  | 32  | 27 | 50  | 44 |
| SMMPA14820 | 9  | 10 | 14 | 28  | 18  | 30  | 18 | 14  | 16 |
| SMMPA14821 | 26 | 10 | 25 | 24  | 31  | 27  | 21 | 25  | 22 |
| SMMPA14822 | 20 | 10 | 20 | 56  | 50  | 46  | 41 | 51  | 39 |
| SMMPA14823 | 15 | 22 | 22 | 31  | 22  | 34  | 27 | 36  | 35 |
| SMMPA14824 | 21 | 26 | 21 | 137 | 145 | 94  | 45 | 53  | 49 |
| SMMPA14825 | 22 | 13 | 17 | 24  | 28  | 24  | 18 | 31  | 35 |
| SMMPA14826 | 28 | 21 | 28 | 76  | 50  | 50  | 44 | 86  | 61 |
| SMMPA14827 | 16 | 14 | 12 | 12  | 7   | 11  | 17 | 16  | 22 |
| SMMPA14828 | 34 | 32 | 28 | 37  | 22  | 33  | 42 | 49  | 58 |
| SMMPA14829 | 21 | 14 | 16 | 27  | 28  | 24  | 19 | 28  | 18 |
| SMMPA14830 | 27 | 40 | 30 | 180 | 174 | 135 | 88 | 136 | 88 |
| SMMPA14831 | 15 | 16 | 18 | 74  | 85  | 63  | 31 | 42  | 36 |
| SMMPA14832 | 29 | 25 | 30 | 103 | 109 | 94  | 57 | 83  | 83 |
| SMMPA14833 | 19 | 15 | 8  | 31  | 28  | 31  | 16 | 23  | 23 |
| SMMPA14834 | 34 | 45 | 41 | 30  | 30  | 29  | 29 | 51  | 30 |
| SMMPA14835 | 29 | 30 | 21 | 44  | 40  | 36  | 31 | 31  | 46 |
| SMMPA14836 | 14 | 19 | 17 | 9   | 9   | 7   | 10 | 15  | 18 |
| SMMPA14837 | 8  | 10 | 3  | 12  | 12  | 18  | 13 | 18  | 27 |
| SMMPA14838 | 15 | 24 | 18 | 16  | 5   | 4   | 17 | 17  | 27 |
| SMMPA14839 | 12 | 9  | 11 | 7   | 12  | 9   | 14 | 13  | 14 |
| SMMPA14840 | 30 | 35 | 37 | 50  | 26  | 35  | 51 | 53  | 57 |
| SMMPA14841 | 14 | 17 | 21 | 11  | 9   | 12  | 12 | 27  | 23 |
| SMMPA14842 | 10 | 17 | 12 | 24  | 16  | 28  | 24 | 19  | 27 |
| SMMPA14843 | 15 | 28 | 22 | 22  | 26  | 25  | 24 | 32  | 31 |
| SMMPA14844 | 25 | 18 | 26 | 15  | 23  | 24  | 37 | 23  | 43 |
| SMMPA14845 | 31 | 26 | 26 | 34  | 34  | 28  | 32 | 48  | 36 |

|            |    |    |    |     |     |     |     |     |     |
|------------|----|----|----|-----|-----|-----|-----|-----|-----|
| SMMPA14846 | 26 | 35 | 22 | 215 | 232 | 153 | 140 | 147 | 138 |
| SMMPA14847 | 39 | 34 | 26 | 681 | 622 | 544 | 323 | 456 | 373 |
| SMMPA14848 | 25 | 28 | 22 | 200 | 179 | 132 | 83  | 105 | 96  |
| SMMPA14849 | 13 | 24 | 18 | 145 | 136 | 114 | 56  | 76  | 56  |
| SMMPA14850 | 21 | 28 | 27 | 291 | 262 | 224 | 133 | 188 | 159 |
| SMMPA14851 | 51 | 68 | 43 | 123 | 130 | 87  | 64  | 94  | 60  |
| SMMPA14852 | 17 | 21 | 13 | 57  | 77  | 57  | 32  | 57  | 44  |
| SMMPA14853 | 16 | 15 | 10 | 18  | 23  | 31  | 28  | 34  | 23  |
| SMMPA14854 | 21 | 20 | 24 | 37  | 40  | 35  | 23  | 43  | 23  |
| SMMPA14855 | 11 | 6  | 4  | 7   | 10  | 13  | 11  | 17  | 15  |
| SMMPA14856 | 8  | 17 | 18 | 28  | 23  | 18  | 9   | 19  | 23  |
| SMMPA14857 | 12 | 15 | 12 | 8   | 8   | 12  | 15  | 21  | 22  |
| SMMPA14858 | 11 | 13 | 19 | 28  | 30  | 28  | 22  | 25  | 16  |
| SMMPA14859 | 27 | 18 | 23 | 30  | 29  | 21  | 19  | 25  | 23  |
| SMMPA14860 | 18 | 18 | 18 | 23  | 33  | 29  | 20  | 18  | 26  |
| SMMPA14861 | 15 | 10 | 16 | 17  | 12  | 23  | 16  | 24  | 22  |
| SMMPA14862 | 12 | 19 | 12 | 67  | 87  | 56  | 27  | 42  | 43  |
| SMMPA14863 | 9  | 11 | 11 | 48  | 41  | 38  | 18  | 18  | 13  |
| SMMPA14864 | 24 | 30 | 26 | 55  | 48  | 43  | 47  | 44  | 48  |
| SMMPA14865 | 38 | 36 | 37 | 155 | 148 | 96  | 60  | 110 | 74  |
| SMMPA14866 | 20 | 25 | 22 | 116 | 115 | 96  | 71  | 87  | 77  |
| SMMPA14867 | 28 | 27 | 32 | 195 | 159 | 114 | 93  | 104 | 94  |
| SMMPA14868 | 18 | 21 | 12 | 76  | 81  | 59  | 22  | 33  | 21  |
| SMMPA14869 | 27 | 28 | 24 | 39  | 32  | 26  | 34  | 49  | 53  |
| SMMPA14870 | 24 | 28 | 33 | 47  | 51  | 42  | 38  | 46  | 50  |
| SMMPA14871 | 16 | 12 | 16 | 11  | 13  | 16  | 8   | 17  | 11  |
| SMMPA14872 | 17 | 19 | 19 | 33  | 34  | 48  | 26  | 33  | 46  |
| SMMPA14873 | 18 | 14 | 14 | 31  | 23  | 20  | 18  | 27  | 24  |
| SMMPA14874 | 25 | 28 | 37 | 91  | 64  | 49  | 39  | 52  | 63  |
| SMMPA14875 | 20 | 29 | 17 | 62  | 51  | 54  | 57  | 82  | 70  |
| SMMPA14876 | 22 | 14 | 21 | 24  | 21  | 15  | 20  | 22  | 20  |
| SMMPA14877 | 14 | 18 | 10 | 36  | 28  | 20  | 32  | 33  | 23  |
| SMMPA14878 | 11 | 18 | 16 | 23  | 20  | 14  | 32  | 34  | 32  |
| SMMPA14879 | 24 | 22 | 22 | 56  | 47  | 46  | 46  | 46  | 48  |
| SMMPA14880 | 18 | 21 | 14 | 28  | 25  | 30  | 21  | 26  | 30  |
| SMMPA14881 | 16 | 13 | 16 | 50  | 42  | 37  | 24  | 24  | 27  |
| SMMPA14882 | 18 | 26 | 19 | 120 | 110 | 85  | 65  | 74  | 61  |
| SMMPA14883 | 17 | 16 | 17 | 56  | 72  | 47  | 43  | 46  | 50  |
| SMMPA14884 | 39 | 31 | 22 | 96  | 80  | 70  | 34  | 70  | 51  |
| SMMPA14885 | 14 | 21 | 12 | 104 | 96  | 70  | 59  | 61  | 63  |
| SMMPA14886 | 19 | 25 | 16 | 149 | 141 | 92  | 97  | 93  | 107 |

|            |    |    |    |     |     |     |    |     |     |
|------------|----|----|----|-----|-----|-----|----|-----|-----|
| SMMPA14887 | 6  | 5  | 8  | 29  | 43  | 16  | 18 | 23  | 11  |
| SMMPA14888 | 9  | 20 | 18 | 64  | 77  | 52  | 35 | 57  | 62  |
| SMMPA14889 | 16 | 19 | 20 | 105 | 100 | 89  | 58 | 62  | 54  |
| SMMPA14890 | 25 | 25 | 26 | 171 | 139 | 107 | 63 | 74  | 64  |
| SMMPA14891 | 16 | 17 | 14 | 53  | 43  | 39  | 30 | 44  | 38  |
| SMMPA14892 | 16 | 16 | 13 | 51  | 45  | 31  | 35 | 35  | 27  |
| SMMPA14893 | 20 | 20 | 21 | 95  | 81  | 52  | 39 | 58  | 50  |
| SMMPA14894 | 17 | 13 | 9  | 14  | 9   | 8   | 21 | 15  | 18  |
| SMMPA14895 | 9  | 13 | 13 | 16  | 11  | 16  | 22 | 25  | 13  |
| SMMPA14896 | 28 | 13 | 21 | 13  | 21  | 13  | 24 | 29  | 28  |
| SMMPA14897 | 30 | 34 | 28 | 42  | 34  | 43  | 20 | 34  | 39  |
| SMMPA14898 | 9  | 14 | 14 | 9   | 7   | 7   | 9  | 20  | 23  |
| SMMPA14899 | 28 | 26 | 29 | 83  | 63  | 67  | 43 | 49  | 46  |
| SMMPA14900 | 9  | 16 | 8  | 16  | 17  | 14  | 8  | 14  | 23  |
| SMMPA14901 | 15 | 11 | 23 | 53  | 46  | 28  | 45 | 53  | 48  |
| SMMPA14902 | 37 | 33 | 18 | 32  | 47  | 39  | 41 | 53  | 59  |
| SMMPA14903 | 7  | 12 | 7  | 24  | 19  | 19  | 15 | 29  | 19  |
| SMMPA14904 | 18 | 22 | 17 | 30  | 21  | 18  | 20 | 34  | 26  |
| SMMPA14905 | 8  | 3  | 5  | 4   | 3   | 2   | 5  | 8   | 7   |
| SMMPA14906 | 13 | 15 | 17 | 12  | 18  | 19  | 20 | 23  | 18  |
| SMMPA14907 | 25 | 22 | 17 | 38  | 33  | 37  | 22 | 32  | 26  |
| SMMPA14908 | 20 | 18 | 21 | 43  | 49  | 33  | 29 | 44  | 39  |
| SMMPA14909 | 8  | 13 | 9  | 33  | 19  | 15  | 17 | 26  | 21  |
| SMMPA14910 | 29 | 33 | 25 | 38  | 37  | 24  | 34 | 40  | 33  |
| SMMPA14911 | 36 | 41 | 36 | 78  | 72  | 70  | 65 | 91  | 83  |
| SMMPA14912 | 16 | 21 | 16 | 81  | 61  | 51  | 49 | 52  | 35  |
| SMMPA14913 | 6  | 16 | 9  | 32  | 27  | 17  | 25 | 29  | 32  |
| SMMPA14914 | 21 | 24 | 20 | 80  | 61  | 50  | 52 | 63  | 66  |
| SMMPA14915 | 17 | 18 | 10 | 38  | 40  | 45  | 34 | 37  | 49  |
| SMMPA14916 | 25 | 37 | 29 | 66  | 71  | 42  | 55 | 66  | 55  |
| SMMPA14917 | 36 | 36 | 43 | 56  | 55  | 35  | 46 | 57  | 59  |
| SMMPA14918 | 27 | 27 | 21 | 164 | 136 | 116 | 78 | 97  | 106 |
| SMMPA14919 | 22 | 16 | 22 | 61  | 47  | 23  | 27 | 57  | 53  |
| SMMPA14920 | 21 | 19 | 19 | 92  | 74  | 60  | 40 | 68  | 65  |
| SMMPA14921 | 14 | 9  | 17 | 56  | 39  | 41  | 24 | 42  | 36  |
| SMMPA14922 | 24 | 24 | 23 | 46  | 50  | 37  | 30 | 42  | 31  |
| SMMPA14923 | 41 | 28 | 29 | 86  | 92  | 58  | 50 | 80  | 75  |
| SMMPA14924 | 29 | 41 | 35 | 93  | 79  | 70  | 45 | 68  | 57  |
| SMMPA14925 | 24 | 25 | 22 | 170 | 153 | 114 | 64 | 105 | 76  |
| SMMPA14926 | 20 | 16 | 16 | 28  | 43  | 39  | 23 | 36  | 29  |
| SMMPA14927 | 18 | 23 | 27 | 57  | 59  | 56  | 31 | 38  | 43  |

|            |    |    |    |     |     |     |    |     |    |
|------------|----|----|----|-----|-----|-----|----|-----|----|
| SMMPA14928 | 14 | 29 | 19 | 32  | 11  | 17  | 28 | 24  | 30 |
| SMMPA14929 | 8  | 7  | 13 | 15  | 15  | 13  | 7  | 10  | 11 |
| SMMPA14930 | 22 | 37 | 21 | 192 | 187 | 126 | 62 | 96  | 87 |
| SMMPA14931 | 23 | 24 | 35 | 27  | 14  | 17  | 20 | 28  | 27 |
| SMMPA14932 | 11 | 10 | 12 | 13  | 18  | 14  | 11 | 19  | 19 |
| SMMPA14933 | 23 | 18 | 20 | 22  | 9   | 18  | 14 | 16  | 12 |
| SMMPA14934 | 18 | 14 | 24 | 22  | 30  | 13  | 21 | 30  | 28 |
| SMMPA14935 | 18 | 17 | 19 | 25  | 26  | 19  | 30 | 29  | 39 |
| SMMPA14936 | 22 | 21 | 18 | 28  | 26  | 26  | 15 | 36  | 34 |
| SMMPA14937 | 26 | 25 | 32 | 79  | 70  | 50  | 64 | 77  | 86 |
| SMMPA14938 | 39 | 27 | 23 | 28  | 29  | 27  | 19 | 40  | 36 |
| SMMPA14939 | 31 | 25 | 30 | 47  | 45  | 29  | 26 | 36  | 32 |
| SMMPA14940 | 17 | 16 | 17 | 22  | 15  | 17  | 26 | 23  | 17 |
| SMMPA14941 | 46 | 58 | 46 | 170 | 179 | 134 | 67 | 68  | 64 |
| SMMPA14942 | 22 | 31 | 26 | 37  | 40  | 27  | 36 | 35  | 26 |
| SMMPA14943 | 27 | 29 | 28 | 48  | 46  | 42  | 37 | 49  | 41 |
| SMMPA14944 | 11 | 16 | 17 | 14  | 20  | 15  | 12 | 19  | 18 |
| SMMPA14945 | 28 | 37 | 30 | 49  | 49  | 32  | 35 | 42  | 47 |
| SMMPA14946 | 13 | 12 | 5  | 14  | 21  | 12  | 21 | 31  | 31 |
| SMMPA14947 | 27 | 4  | 9  | 119 | 117 | 87  | 45 | 48  | 41 |
| SMMPA14948 | 24 | 27 | 25 | 58  | 45  | 36  | 53 | 58  | 45 |
| SMMPA14949 | 40 | 28 | 20 | 43  | 27  | 25  | 43 | 60  | 42 |
| SMMPA14950 | 17 | 12 | 12 | 16  | 17  | 8   | 22 | 29  | 18 |
| SMMPA14951 | 0  | 0  | 0  | 2   | 5   | 2   | 0  | 1   | 1  |
| SMMPA14952 | 28 | 15 | 25 | 27  | 23  | 28  | 21 | 25  | 30 |
| SMMPA14953 | 19 | 28 | 29 | 23  | 22  | 20  | 20 | 33  | 33 |
| SMMPA14954 | 17 | 17 | 7  | 23  | 16  | 12  | 20 | 29  | 34 |
| SMMPA14955 | 3  | 2  | 5  | 4   | 5   | 10  | 5  | 12  | 10 |
| SMMPA14956 | 38 | 29 | 34 | 136 | 138 | 108 | 81 | 81  | 77 |
| SMMPA14957 | 11 | 11 | 7  | 34  | 35  | 37  | 14 | 27  | 17 |
| SMMPA14958 | 25 | 33 | 21 | 147 | 137 | 103 | 56 | 78  | 93 |
| SMMPA14959 | 8  | 23 | 18 | 100 | 104 | 83  | 31 | 64  | 38 |
| SMMPA14960 | 5  | 1  | 1  | 14  | 14  | 14  | 3  | 4   | 1  |
| SMMPA14961 | 33 | 29 | 32 | 183 | 131 | 133 | 93 | 104 | 96 |
| SMMPA14962 | 4  | 4  | 8  | 150 | 169 | 176 | 20 | 23  | 23 |
| SMMPA14963 | 10 | 9  | 10 | 65  | 79  | 45  | 18 | 33  | 15 |
| SMMPA14964 | 12 | 21 | 23 | 98  | 75  | 59  | 44 | 50  | 43 |
| SMMPA14965 | 11 | 12 | 8  | 51  | 54  | 47  | 17 | 19  | 19 |
| SMMPA14966 | 9  | 11 | 5  | 60  | 52  | 43  | 26 | 32  | 29 |
| SMMPA14967 | 12 | 14 | 13 | 30  | 24  | 17  | 16 | 18  | 27 |
| SMMPA14968 | 20 | 18 | 11 | 41  | 30  | 35  | 22 | 39  | 33 |

|            |    |    |    |     |     |     |     |     |     |
|------------|----|----|----|-----|-----|-----|-----|-----|-----|
| SMMPA14969 | 14 | 15 | 9  | 19  | 13  | 18  | 11  | 25  | 23  |
| SMMPA14970 | 4  | 5  | 6  | 83  | 57  | 65  | 34  | 28  | 32  |
| SMMPA14971 | 7  | 5  | 5  | 73  | 72  | 95  | 36  | 48  | 55  |
| SMMPA14972 | 10 | 15 | 15 | 90  | 87  | 75  | 38  | 67  | 42  |
| SMMPA14973 | 2  | 1  | 3  | 24  | 21  | 41  | 18  | 18  | 13  |
| SMMPA14974 | 9  | 9  | 8  | 148 | 111 | 127 | 89  | 129 | 104 |
| SMMPA14975 | 7  | 9  | 3  | 101 | 73  | 67  | 58  | 80  | 55  |
| SMMPA14976 | 11 | 5  | 3  | 33  | 33  | 27  | 8   | 21  | 20  |
| SMMPA14977 | 18 | 15 | 9  | 18  | 17  | 7   | 16  | 20  | 21  |
| SMMPA14978 | 15 | 17 | 14 | 28  | 23  | 20  | 17  | 25  | 26  |
| SMMPA14979 | 10 | 17 | 15 | 28  | 24  | 29  | 21  | 32  | 24  |
| SMMPA14980 | 29 | 37 | 24 | 190 | 180 | 103 | 70  | 88  | 87  |
| SMMPA14981 | 9  | 11 | 15 | 46  | 38  | 32  | 31  | 31  | 36  |
| SMMPA14982 | 47 | 37 | 52 | 81  | 68  | 57  | 61  | 86  | 93  |
| SMMPA14983 | 29 | 34 | 19 | 87  | 64  | 71  | 44  | 64  | 64  |
| SMMPA14984 | 9  | 22 | 18 | 29  | 31  | 24  | 23  | 44  | 35  |
| SMMPA14985 | 22 | 28 | 20 | 88  | 63  | 61  | 76  | 78  | 88  |
| SMMPA14986 | 15 | 30 | 26 | 808 | 847 | 716 | 462 | 580 | 523 |
| SMMPA14987 | 22 | 19 | 11 | 134 | 130 | 111 | 95  | 127 | 104 |
| SMMPA14988 | 25 | 19 | 15 | 28  | 18  | 21  | 16  | 34  | 34  |
| SMMPA14989 | 20 | 26 | 33 | 111 | 109 | 83  | 47  | 64  | 59  |
| SMMPA14990 | 17 | 27 | 23 | 207 | 179 | 128 | 65  | 67  | 80  |
| SMMPA14991 | 16 | 26 | 28 | 25  | 21  | 16  | 27  | 31  | 33  |
| SMMPA14992 | 26 | 16 | 15 | 35  | 34  | 31  | 16  | 21  | 26  |
| SMMPA14993 | 6  | 9  | 7  | 18  | 18  | 17  | 20  | 35  | 22  |
| SMMPA14994 | 24 | 21 | 13 | 38  | 49  | 35  | 35  | 27  | 37  |
| SMMPA14995 | 9  | 22 | 16 | 70  | 65  | 60  | 26  | 30  | 44  |
| SMMPA14996 | 33 | 33 | 37 | 126 | 92  | 73  | 76  | 84  | 78  |
| SMMPA14997 | 13 | 17 | 18 | 17  | 20  | 17  | 21  | 16  | 14  |
| SMMPA14998 | 0  | 3  | 1  | 7   | 4   | 5   | 4   | 9   | 1   |
| SMMPA14999 | 28 | 22 | 23 | 63  | 59  | 44  | 29  | 40  | 33  |
| SMMPA15000 | 19 | 18 | 26 | 36  | 35  | 28  | 39  | 63  | 50  |
| SMMPT001   | 44 | 44 | 39 | 89  | 78  | 48  | 49  | 59  | 83  |
| SMMPT002   | 13 | 12 | 15 | 20  | 24  | 23  | 38  | 42  | 38  |
| SMMPT003   | 9  | 8  | 10 | 17  | 32  | 14  | 18  | 30  | 23  |
| SMMPT004   | 26 | 24 | 33 | 24  | 25  | 29  | 46  | 42  | 45  |
| SMMPT005   | 45 | 32 | 32 | 28  | 36  | 20  | 39  | 46  | 38  |
| SMMPT006   | 20 | 17 | 19 | 149 | 118 | 87  | 82  | 110 | 99  |
| SMMPT007   | 29 | 42 | 28 | 509 | 457 | 414 | 246 | 350 | 292 |
| SMMPT008   | 1  | 2  | 1  | 21  | 17  | 10  | 14  | 20  | 19  |
| SMMPT009   | 19 | 28 | 21 | 98  | 94  | 79  | 68  | 91  | 93  |

|          |    |    |    |     |     |    |    |     |     |
|----------|----|----|----|-----|-----|----|----|-----|-----|
| SMMPT010 | 12 | 4  | 12 | 15  | 11  | 14 | 12 | 24  | 25  |
| SMMPT011 | 13 | 16 | 9  | 32  | 35  | 32 | 31 | 35  | 28  |
| SMMPT012 | 24 | 30 | 25 | 42  | 41  | 34 | 71 | 80  | 65  |
| SMMPT013 | 19 | 26 | 12 | 57  | 83  | 63 | 38 | 71  | 61  |
| SMMPT014 | 38 | 30 | 35 | 33  | 25  | 28 | 27 | 32  | 42  |
| SMMPT015 | 22 | 28 | 21 | 60  | 55  | 46 | 36 | 51  | 37  |
| SMMPT016 | 11 | 17 | 13 | 16  | 22  | 13 | 13 | 22  | 25  |
| SMMPT017 | 26 | 26 | 24 | 24  | 22  | 23 | 25 | 42  | 29  |
| SMMPT018 | 5  | 7  | 5  | 13  | 10  | 13 | 4  | 5   | 7   |
| SMMPT019 | 24 | 40 | 27 | 51  | 35  | 47 | 33 | 32  | 40  |
| SMMPT020 | 35 | 27 | 29 | 52  | 43  | 49 | 34 | 53  | 45  |
| SMMPT021 | 21 | 15 | 18 | 25  | 30  | 28 | 27 | 41  | 32  |
| SMMPT022 | 6  | 13 | 10 | 11  | 5   | 7  | 19 | 18  | 18  |
| SMMPT023 | 7  | 5  | 6  | 14  | 10  | 14 | 4  | 3   | 3   |
| SMMPT024 | 32 | 35 | 27 | 47  | 58  | 42 | 35 | 52  | 63  |
| SMMPT025 | 12 | 21 | 18 | 70  | 77  | 84 | 43 | 55  | 53  |
| SMMPT026 | 59 | 56 | 53 | 28  | 25  | 28 | 43 | 56  | 44  |
| SMMPT027 | 20 | 14 | 9  | 14  | 7   | 11 | 16 | 26  | 38  |
| SMMPT028 | 26 | 18 | 5  | 115 | 97  | 73 | 48 | 83  | 61  |
| SMMPT029 | 16 | 12 | 18 | 18  | 14  | 20 | 26 | 20  | 25  |
| SMMPT030 | 15 | 20 | 23 | 24  | 23  | 30 | 36 | 42  | 33  |
| SMMPT031 | 14 | 6  | 15 | 7   | 8   | 12 | 11 | 29  | 15  |
| SMMPT032 | 23 | 26 | 23 | 182 | 161 | 98 | 92 | 144 | 117 |
| SMMPT033 | 19 | 28 | 25 | 50  | 45  | 33 | 28 | 38  | 42  |
| SMMPT034 | 6  | 7  | 7  | 30  | 30  | 26 | 5  | 28  | 16  |
| SMMPT035 | 28 | 19 | 25 | 35  | 38  | 30 | 38 | 44  | 46  |
| SMMPT036 | 8  | 17 | 6  | 71  | 63  | 47 | 26 | 42  | 38  |
| SMMPT037 | 13 | 13 | 16 | 17  | 15  | 17 | 22 | 17  | 21  |
| SMMPT038 | 25 | 25 | 11 | 47  | 60  | 34 | 49 | 62  | 64  |
| SMMPT039 | 23 | 23 | 22 | 14  | 18  | 16 | 19 | 26  | 30  |
| SMMPT040 | 12 | 12 | 5  | 22  | 24  | 20 | 16 | 22  | 20  |
| SMMPT041 | 16 | 14 | 17 | 84  | 80  | 54 | 35 | 60  | 57  |
| SMMPT042 | 7  | 12 | 6  | 27  | 15  | 14 | 23 | 29  | 22  |
| SMMPT043 | 24 | 21 | 19 | 41  | 38  | 36 | 37 | 39  | 38  |
| SMMPT044 | 27 | 27 | 24 | 128 | 116 | 87 | 65 | 73  | 78  |
| SMMPT045 | 15 | 15 | 14 | 164 | 129 | 85 | 69 | 83  | 78  |
| SMMPT046 | 24 | 19 | 25 | 28  | 38  | 33 | 44 | 60  | 45  |
| SMMPT047 | 19 | 30 | 17 | 15  | 11  | 18 | 12 | 21  | 19  |
| SMMPT048 | 8  | 6  | 6  | 26  | 28  | 18 | 24 | 22  | 19  |
| SMMPT049 | 22 | 26 | 22 | 46  | 37  | 23 | 55 | 59  | 54  |
| SMMPT050 | 19 | 23 | 14 | 109 | 89  | 81 | 63 | 96  | 64  |



|          |    |    |    |     |     |     |     |     |     |
|----------|----|----|----|-----|-----|-----|-----|-----|-----|
| SMMPT051 | 7  | 9  | 5  | 8   | 6   | 4   | 12  | 6   | 9   |
| SMMPT052 | 21 | 37 | 35 | 64  | 58  | 41  | 45  | 69  | 66  |
| SMMPT053 | 9  | 11 | 12 | 21  | 17  | 19  | 26  | 27  | 30  |
| SMMPT054 | 19 | 20 | 22 | 23  | 23  | 15  | 28  | 32  | 34  |
| SMMPT055 | 10 | 13 | 9  | 11  | 7   | 7   | 10  | 14  | 13  |
| SMMPT056 | 18 | 14 | 15 | 50  | 36  | 29  | 34  | 37  | 39  |
| SMMPT057 | 29 | 27 | 21 | 114 | 86  | 80  | 54  | 82  | 70  |
| SMMPT058 | 11 | 10 | 16 | 52  | 51  | 37  | 31  | 48  | 45  |
| SMMPT059 | 30 | 23 | 18 | 48  | 50  | 45  | 47  | 72  | 81  |
| SMMPT060 | 10 | 10 | 15 | 99  | 104 | 60  | 57  | 90  | 68  |
| SMMPT061 | 17 | 8  | 10 | 140 | 113 | 88  | 49  | 63  | 54  |
| SMMPT062 | 42 | 32 | 27 | 82  | 55  | 50  | 47  | 55  | 34  |
| SMMPT063 | 15 | 10 | 18 | 19  | 5   | 5   | 17  | 19  | 23  |
| SMMPT064 | 20 | 16 | 14 | 59  | 65  | 51  | 35  | 47  | 34  |
| SMMPT065 | 14 | 18 | 18 | 16  | 15  | 14  | 17  | 19  | 27  |
| SMMPT066 | 68 | 69 | 50 | 66  | 83  | 58  | 80  | 87  | 73  |
| SMMPT067 | 16 | 27 | 29 | 26  | 17  | 11  | 12  | 11  | 28  |
| SMMPT068 | 18 | 20 | 16 | 74  | 65  | 50  | 55  | 61  | 57  |
| SMMPT069 | 20 | 18 | 17 | 20  | 15  | 11  | 22  | 31  | 30  |
| SMMPT070 | 81 | 75 | 75 | 95  | 68  | 50  | 80  | 87  | 84  |
| SMMPT071 | 8  | 10 | 6  | 9   | 13  | 10  | 12  | 14  | 14  |
| SMMPT072 | 15 | 9  | 9  | 5   | 5   | 6   | 8   | 11  | 18  |
| SMMPT073 | 11 | 17 | 14 | 210 | 191 | 176 | 107 | 108 | 106 |
| SMMPT074 | 14 | 20 | 10 | 7   | 6   | 9   | 9   | 10  | 12  |
| SMMPT075 | 9  | 10 | 10 | 13  | 10  | 12  | 17  | 15  | 8   |
| SMMPT076 | 8  | 15 | 12 | 108 | 110 | 67  | 59  | 78  | 69  |
| SMMPT077 | 21 | 20 | 28 | 90  | 63  | 66  | 50  | 82  | 72  |
| SMMPT078 | 8  | 9  | 9  | 33  | 16  | 25  | 20  | 22  | 24  |
| SMMPT079 | 19 | 11 | 11 | 91  | 71  | 55  | 37  | 63  | 68  |
| SMMPT080 | 19 | 22 | 20 | 52  | 54  | 44  | 39  | 58  | 60  |
| SMMPT081 | 11 | 14 | 13 | 17  | 16  | 18  | 23  | 28  | 26  |
| SMMPT082 | 42 | 45 | 38 | 28  | 30  | 28  | 37  | 38  | 47  |
| SMMPT083 | 26 | 25 | 21 | 20  | 26  | 21  | 17  | 25  | 31  |
| SMMPT084 | 11 | 16 | 21 | 30  | 23  | 29  | 22  | 19  | 26  |
| SMMPT085 | 4  | 9  | 7  | 26  | 22  | 16  | 15  | 31  | 21  |
| SMMPT086 | 32 | 24 | 39 | 29  | 30  | 28  | 32  | 40  | 54  |
| SMMPT087 | 1  | 3  | 1  | 65  | 63  | 60  | 30  | 27  | 30  |
| SMMPT088 | 20 | 17 | 12 | 20  | 14  | 21  | 16  | 27  | 35  |
| SMMPT089 | 20 | 13 | 21 | 327 | 280 | 205 | 114 | 176 | 147 |
| SMMPT090 | 18 | 18 | 13 | 44  | 40  | 36  | 32  | 30  | 34  |
| SMMPT091 | 14 | 14 | 15 | 9   | 15  | 9   | 13  | 29  | 27  |

|          |    |    |    |     |     |     |    |     |     |
|----------|----|----|----|-----|-----|-----|----|-----|-----|
| SMMPT092 | 13 | 9  | 8  | 18  | 16  | 7   | 21 | 25  | 33  |
| SMMPT093 | 21 | 17 | 16 | 60  | 52  | 58  | 26 | 36  | 24  |
| SMMPT094 | 21 | 22 | 21 | 122 | 122 | 92  | 51 | 66  | 55  |
| SMMPT095 | 23 | 15 | 16 | 84  | 65  | 50  | 47 | 43  | 62  |
| SMMPT096 | 5  | 7  | 12 | 20  | 17  | 14  | 15 | 23  | 15  |
| SMMPT097 | 26 | 28 | 29 | 40  | 42  | 51  | 24 | 33  | 34  |
| SMMPT098 | 16 | 20 | 13 | 12  | 12  | 21  | 19 | 20  | 18  |
| SMMPT099 | 24 | 21 | 20 | 18  | 22  | 21  | 27 | 22  | 29  |
| SMMPT100 | 5  | 10 | 6  | 2   | 2   | 6   | 11 | 8   | 14  |
| SMMPT101 | 23 | 27 | 14 | 48  | 39  | 26  | 23 | 30  | 47  |
| SMMPT102 | 12 | 17 | 19 | 56  | 42  | 39  | 46 | 48  | 59  |
| SMMPT103 | 14 | 20 | 17 | 52  | 63  | 35  | 28 | 26  | 23  |
| SMMPT104 | 17 | 12 | 14 | 20  | 28  | 23  | 8  | 23  | 18  |
| SMMPT105 | 51 | 60 | 70 | 90  | 78  | 69  | 87 | 115 | 104 |
| SMMPT106 | 9  | 8  | 7  | 14  | 7   | 10  | 9  | 14  | 12  |
| SMMPT107 | 30 | 31 | 31 | 32  | 27  | 32  | 31 | 36  | 30  |
| SMMPT108 | 17 | 20 | 17 | 83  | 81  | 56  | 49 | 52  | 49  |
| SMMPT109 | 12 | 26 | 13 | 56  | 44  | 42  | 35 | 50  | 35  |
| SMMPT110 | 17 | 14 | 13 | 69  | 60  | 44  | 31 | 52  | 51  |
| SMMPT111 | 13 | 20 | 17 | 21  | 25  | 20  | 21 | 31  | 36  |
| SMMPT112 | 15 | 23 | 20 | 52  | 32  | 30  | 38 | 30  | 42  |
| SMMPT113 | 19 | 17 | 20 | 290 | 236 | 213 | 81 | 81  | 88  |
| SMMPT114 | 12 | 19 | 9  | 16  | 11  | 15  | 28 | 23  | 35  |
| SMMPT115 | 21 | 15 | 20 | 22  | 21  | 20  | 37 | 36  | 29  |
| SMMPT116 | 11 | 17 | 13 | 77  | 67  | 43  | 55 | 54  | 51  |
| SMMPT117 | 7  | 3  | 1  | 19  | 24  | 22  | 13 | 12  | 14  |
| SMMPT118 | 20 | 10 | 5  | 131 | 84  | 73  | 65 | 100 | 64  |
| SMMPT119 | 21 | 17 | 15 | 23  | 23  | 25  | 15 | 22  | 44  |
| SMMPT120 | 19 | 18 | 14 | 21  | 20  | 23  | 29 | 38  | 37  |
| SMMPT121 | 4  | 1  | 1  | 0   | 1   | 3   | 4  | 5   | 6   |
| SMMPT122 | 9  | 5  | 6  | 14  | 10  | 18  | 11 | 15  | 16  |
| SMMPT123 | 21 | 19 | 12 | 17  | 29  | 25  | 22 | 22  | 19  |
| SMMPT124 | 27 | 19 | 13 | 20  | 21  | 23  | 19 | 33  | 40  |
| SMMPT125 | 20 | 22 | 25 | 232 | 201 | 172 | 74 | 106 | 88  |
| SMMPT126 | 12 | 11 | 9  | 5   | 6   | 5   | 12 | 13  | 8   |
| SMMPT127 | 24 | 19 | 11 | 21  | 14  | 18  | 26 | 22  | 26  |
| SMMPT128 | 48 | 54 | 49 | 34  | 41  | 42  | 71 | 71  | 86  |
| SMMPT129 | 31 | 22 | 18 | 58  | 47  | 33  | 43 | 60  | 49  |
| SMMPT130 | 9  | 5  | 6  | 16  | 10  | 14  | 2  | 5   | 6   |
| SMMPT131 | 5  | 2  | 6  | 16  | 12  | 4   | 9  | 9   | 7   |
| SMMPT132 | 9  | 22 | 19 | 17  | 20  | 16  | 30 | 25  | 31  |

|          |    |    |    |     |     |     |    |     |     |
|----------|----|----|----|-----|-----|-----|----|-----|-----|
| SMMPT133 | 10 | 9  | 9  | 14  | 12  | 8   | 13 | 17  | 12  |
| SMMPT134 | 12 | 20 | 18 | 180 | 152 | 125 | 61 | 85  | 92  |
| SMMPT135 | 7  | 11 | 19 | 9   | 8   | 6   | 23 | 28  | 39  |
| SMMPT136 | 22 | 32 | 26 | 18  | 31  | 16  | 22 | 27  | 40  |
| SMMPT137 | 10 | 3  | 4  | 82  | 62  | 65  | 81 | 92  | 103 |
| SMMPT138 | 23 | 16 | 17 | 195 | 179 | 130 | 91 | 106 | 102 |
| SMMPT139 | 16 | 25 | 20 | 160 | 148 | 125 | 84 | 84  | 94  |
| SMMPT140 | 12 | 12 | 12 | 23  | 16  | 11  | 21 | 34  | 19  |
| SMMPT141 | 14 | 19 | 19 | 18  | 23  | 14  | 32 | 46  | 56  |
| SMMPT142 | 45 | 39 | 35 | 55  | 59  | 60  | 34 | 33  | 50  |
| SMMPT143 | 15 | 11 | 18 | 11  | 12  | 18  | 17 | 19  | 25  |
| SMMPT144 | 21 | 17 | 16 | 91  | 80  | 64  | 41 | 48  | 46  |
| SMMPT145 | 10 | 8  | 11 | 3   | 5   | 7   | 5  | 9   | 10  |
| SMMPT146 | 3  | 9  | 10 | 6   | 10  | 7   | 21 | 15  | 17  |
| SMMPT147 | 13 | 10 | 9  | 38  | 42  | 32  | 14 | 20  | 16  |
| SMMPT148 | 16 | 11 | 10 | 14  | 22  | 13  | 14 | 19  | 21  |
| SMMPT149 | 13 | 21 | 17 | 54  | 37  | 46  | 35 | 31  | 39  |
| SMMPT150 | 37 | 39 | 32 | 114 | 105 | 113 | 72 | 60  | 87  |
| SMMPT151 | 9  | 10 | 8  | 6   | 4   | 5   | 9  | 11  | 9   |
| SMMPT152 | 2  | 2  | 2  | 1   | 0   | 2   | 1  | 1   | 5   |
| SMMPT153 | 3  | 10 | 9  | 81  | 92  | 84  | 37 | 62  | 38  |
| SMMPT154 | 19 | 12 | 16 | 29  | 35  | 18  | 45 | 36  | 34  |
| SMMPT155 | 15 | 20 | 28 | 49  | 32  | 35  | 20 | 33  | 36  |
| SMMPT156 | 6  | 9  | 6  | 11  | 10  | 5   | 9  | 11  | 14  |
| SMMPT157 | 8  | 15 | 9  | 198 | 172 | 137 | 84 | 103 | 106 |
| SMMPT158 | 16 | 19 | 3  | 10  | 16  | 16  | 9  | 12  | 7   |
| SMMPT159 | 5  | 2  | 7  | 10  | 17  | 10  | 15 | 13  | 13  |
| SMMPT160 | 16 | 13 | 14 | 28  | 28  | 25  | 15 | 35  | 16  |
| SMMPT161 | 12 | 12 | 7  | 21  | 6   | 8   | 9  | 17  | 19  |
| SMMPT162 | 26 | 19 | 20 | 11  | 11  | 18  | 20 | 28  | 27  |
| SMMPT163 | 14 | 6  | 8  | 40  | 52  | 39  | 49 | 67  | 55  |
| SMMPT164 | 7  | 7  | 16 | 12  | 9   | 13  | 10 | 27  | 8   |
| SMMPT165 | 39 | 36 | 23 | 16  | 24  | 23  | 44 | 44  | 45  |
| SMMPT166 | 20 | 21 | 17 | 24  | 19  | 21  | 17 | 42  | 31  |
| SMMPT167 | 16 | 15 | 11 | 76  | 67  | 73  | 43 | 54  | 47  |
| SMMPT168 | 11 | 14 | 11 | 76  | 56  | 52  | 70 | 76  | 71  |
| SMMPT169 | 9  | 11 | 17 | 25  | 21  | 24  | 17 | 18  | 22  |
| SMMPT170 | 15 | 16 | 10 | 19  | 12  | 8   | 16 | 13  | 15  |
| SMMPT171 | 10 | 16 | 7  | 88  | 62  | 68  | 65 | 85  | 88  |
| SMMPT172 | 23 | 29 | 31 | 90  | 68  | 71  | 56 | 64  | 71  |
| SMMPT173 | 11 | 13 | 8  | 15  | 19  | 14  | 17 | 20  | 22  |

|          |     |     |     |     |     |     |     |     |     |
|----------|-----|-----|-----|-----|-----|-----|-----|-----|-----|
| SMMPT174 | 10  | 19  | 8   | 92  | 79  | 60  | 65  | 64  | 65  |
| SMMPT175 | 13  | 14  | 13  | 15  | 9   | 5   | 21  | 22  | 30  |
| SMMPT176 | 45  | 50  | 39  | 42  | 44  | 51  | 41  | 59  | 45  |
| SMMPT177 | 16  | 19  | 20  | 557 | 500 | 390 | 445 | 557 | 566 |
| SMMPT178 | 22  | 27  | 28  | 33  | 34  | 36  | 34  | 40  | 45  |
| SMMPT179 | 11  | 15  | 18  | 63  | 46  | 47  | 46  | 64  | 60  |
| SMMPT180 | 7   | 3   | 7   | 16  | 6   | 13  | 8   | 15  | 8   |
| SMMPT181 | 16  | 17  | 16  | 27  | 33  | 38  | 23  | 25  | 15  |
| SMMPT182 | 6   | 4   | 7   | 83  | 71  | 49  | 49  | 50  | 52  |
| SMMPT183 | 22  | 24  | 20  | 29  | 39  | 20  | 29  | 33  | 28  |
| SMMPT184 | 11  | 9   | 8   | 5   | 4   | 6   | 7   | 7   | 12  |
| SMMPT185 | 27  | 25  | 25  | 258 | 249 | 206 | 132 | 179 | 171 |
| SMMPT186 | 2   | 13  | 9   | 9   | 4   | 8   | 12  | 21  | 20  |
| SMMPT187 | 12  | 17  | 19  | 38  | 34  | 31  | 22  | 22  | 27  |
| SMMPT188 | 223 | 202 | 206 | 114 | 89  | 102 | 145 | 180 | 197 |
| SMMPT189 | 47  | 48  | 37  | 128 | 106 | 88  | 86  | 99  | 75  |
| SMMPT190 | 24  | 30  | 23  | 47  | 41  | 41  | 36  | 40  | 38  |
| SMMPT191 | 18  | 19  | 12  | 156 | 133 | 108 | 54  | 90  | 63  |
| SMMPT192 | 14  | 12  | 12  | 20  | 16  | 19  | 17  | 30  | 29  |
| SMMPT193 | 13  | 14  | 9   | 10  | 8   | 13  | 9   | 20  | 18  |
| SMMPT194 | 20  | 13  | 16  | 31  | 23  | 24  | 21  | 21  | 22  |
| SMMPT195 | 18  | 16  | 13  | 21  | 14  | 22  | 27  | 29  | 25  |
| SMMPT196 | 15  | 13  | 9   | 28  | 23  | 21  | 32  | 30  | 40  |
| SMMPT197 | 4   | 7   | 9   | 32  | 12  | 15  | 15  | 29  | 25  |
| SMMPT198 | 11  | 3   | 4   | 10  | 4   | 13  | 17  | 25  | 35  |
| SMMPT199 | 11  | 8   | 17  | 9   | 6   | 11  | 13  | 14  | 16  |
| SMMPT200 | 20  | 18  | 16  | 18  | 14  | 15  | 18  | 37  | 29  |
| SMMPT201 | 7   | 10  | 3   | 1   | 5   | 3   | 12  | 10  | 9   |
| SMMPT202 | 19  | 17  | 18  | 20  | 16  | 25  | 37  | 52  | 39  |
| SMMPT203 | 14  | 11  | 11  | 15  | 20  | 14  | 25  | 21  | 21  |
| SMMPT204 | 33  | 28  | 36  | 161 | 140 | 151 | 65  | 83  | 100 |
| SMMPT205 | 5   | 2   | 9   | 13  | 12  | 8   | 8   | 17  | 9   |
| SMMPT206 | 14  | 17  | 13  | 18  | 16  | 13  | 20  | 26  | 31  |
| SMMPT207 | 28  | 25  | 19  | 23  | 16  | 18  | 19  | 25  | 22  |
| SMMPT208 | 15  | 17  | 23  | 20  | 13  | 19  | 18  | 29  | 20  |
| SMMPT209 | 15  | 12  | 16  | 131 | 94  | 97  | 90  | 127 | 121 |
| SMMPT210 | 9   | 11  | 7   | 25  | 28  | 19  | 16  | 12  | 22  |
| SMMPT211 | 2   | 6   | 10  | 15  | 8   | 9   | 7   | 14  | 9   |
| SMMPT212 | 20  | 13  | 23  | 47  | 55  | 40  | 28  | 51  | 44  |
| SMMPT213 | 8   | 9   | 10  | 21  | 16  | 14  | 11  | 19  | 14  |
| SMMPT214 | 28  | 34  | 30  | 36  | 37  | 44  | 36  | 38  | 32  |

|          |    |    |    |     |     |     |     |     |     |
|----------|----|----|----|-----|-----|-----|-----|-----|-----|
| SMMPT215 | 10 | 10 | 15 | 13  | 9   | 15  | 12  | 19  | 20  |
| SMMPT216 | 10 | 17 | 16 | 93  | 85  | 60  | 35  | 59  | 31  |
| SMMPT217 | 15 | 23 | 24 | 72  | 55  | 39  | 24  | 37  | 33  |
| SMMPT218 | 15 | 11 | 12 | 80  | 67  | 43  | 37  | 39  | 35  |
| SMMPT219 | 40 | 37 | 41 | 52  | 51  | 39  | 45  | 55  | 59  |
| SMMPT220 | 17 | 9  | 14 | 133 | 107 | 84  | 61  | 99  | 91  |
| SMMPT221 | 21 | 17 | 14 | 367 | 309 | 252 | 253 | 342 | 268 |
| SMMPT222 | 29 | 31 | 21 | 48  | 36  | 34  | 63  | 46  | 58  |
| SMMPT223 | 13 | 16 | 5  | 18  | 9   | 14  | 17  | 16  | 18  |
| SMMPT224 | 38 | 34 | 28 | 119 | 106 | 104 | 69  | 84  | 98  |
| SMMPT225 | 24 | 19 | 19 | 20  | 18  | 25  | 17  | 26  | 17  |
| SMMPT226 | 26 | 23 | 25 | 64  | 50  | 46  | 45  | 48  | 54  |
| SMMPT227 | 28 | 31 | 19 | 127 | 112 | 94  | 59  | 72  | 63  |
| SMMPT228 | 19 | 11 | 13 | 14  | 16  | 7   | 9   | 12  | 16  |
| SMMPT229 | 15 | 14 | 15 | 20  | 19  | 14  | 19  | 25  | 22  |
| SMMPT230 | 4  | 6  | 2  | 7   | 4   | 5   | 8   | 11  | 5   |
| SMMPT231 | 15 | 16 | 16 | 51  | 37  | 43  | 31  | 37  | 44  |
| SMMPT232 | 9  | 11 | 13 | 56  | 46  | 39  | 21  | 30  | 32  |
| SMMPT233 | 16 | 16 | 15 | 36  | 29  | 38  | 32  | 25  | 37  |
| SMMPT234 | 15 | 16 | 12 | 32  | 24  | 30  | 24  | 27  | 23  |
| SMMPT235 | 36 | 39 | 41 | 66  | 68  | 56  | 43  | 56  | 47  |
| SMMPT236 | 12 | 23 | 13 | 47  | 35  | 34  | 28  | 37  | 40  |
| SMMPT237 | 18 | 13 | 19 | 78  | 64  | 41  | 23  | 52  | 35  |
| SMMPT238 | 9  | 9  | 8  | 8   | 6   | 9   | 10  | 21  | 14  |
| SMMPT239 | 11 | 19 | 15 | 22  | 24  | 11  | 17  | 35  | 25  |
| SMMPT240 | 24 | 24 | 17 | 39  | 25  | 29  | 23  | 32  | 40  |
| SMMPT241 | 31 | 29 | 38 | 64  | 75  | 50  | 53  | 71  | 58  |
| SMMPT242 | 29 | 19 | 22 | 29  | 18  | 20  | 26  | 35  | 35  |
| SMMPT243 | 34 | 27 | 38 | 27  | 32  | 31  | 44  | 49  | 52  |
| SMMPT244 | 18 | 16 | 20 | 20  | 32  | 20  | 26  | 33  | 23  |
| SMMPT245 | 19 | 24 | 22 | 66  | 60  | 32  | 45  | 53  | 52  |
| SMMPT246 | 15 | 8  | 17 | 15  | 14  | 12  | 16  | 15  | 12  |
| SMMPT247 | 9  | 9  | 9  | 16  | 9   | 14  | 13  | 20  | 10  |
| SMMPT248 | 64 | 58 | 59 | 31  | 30  | 38  | 37  | 29  | 31  |
| SMMPT249 | 13 | 19 | 16 | 32  | 25  | 12  | 24  | 35  | 36  |
| SMMPT250 | 11 | 20 | 9  | 183 | 174 | 132 | 66  | 83  | 56  |
| SMMPT251 | 17 | 11 | 11 | 34  | 43  | 32  | 14  | 19  | 17  |
| SMMPT252 | 58 | 44 | 49 | 23  | 24  | 35  | 33  | 50  | 57  |
| SMMPT253 | 9  | 15 | 15 | 23  | 16  | 18  | 19  | 40  | 36  |
| SMMPT254 | 10 | 13 | 8  | 14  | 9   | 12  | 7   | 16  | 9   |
| SMMPT255 | 22 | 19 | 22 | 107 | 87  | 70  | 58  | 70  | 82  |

|          |    |    |    |     |     |     |    |    |    |
|----------|----|----|----|-----|-----|-----|----|----|----|
| SMMPT256 | 28 | 37 | 31 | 25  | 10  | 19  | 24 | 32 | 37 |
| SMMPT257 | 25 | 20 | 18 | 47  | 50  | 43  | 31 | 56 | 34 |
| SMMPT258 | 14 | 22 | 15 | 31  | 22  | 17  | 27 | 41 | 25 |
| SMMPT259 | 26 | 16 | 14 | 26  | 23  | 26  | 18 | 33 | 33 |
| SMMPT260 | 7  | 15 | 8  | 7   | 10  | 10  | 13 | 13 | 12 |
| SMMPT261 | 32 | 34 | 31 | 30  | 21  | 25  | 17 | 23 | 34 |
| SMMPT262 | 6  | 5  | 6  | 8   | 8   | 4   | 11 | 16 | 14 |
| SMMPT263 | 18 | 21 | 12 | 31  | 20  | 23  | 14 | 25 | 30 |
| SMMPT264 | 8  | 20 | 18 | 96  | 87  | 57  | 60 | 61 | 56 |
| SMMPT265 | 21 | 25 | 21 | 104 | 92  | 69  | 45 | 62 | 64 |
| SMMPT266 | 18 | 20 | 19 | 61  | 40  | 36  | 38 | 46 | 58 |
| SMMPT267 | 12 | 19 | 15 | 31  | 35  | 30  | 24 | 32 | 46 |
| SMMPT268 | 15 | 14 | 14 | 16  | 18  | 21  | 22 | 22 | 25 |
| SMMPT269 | 2  | 2  | 2  | 4   | 0   | 1   | 1  | 3  | 7  |
| SMMPT270 | 1  | 6  | 6  | 92  | 82  | 53  | 47 | 46 | 35 |
| SMMPT271 | 43 | 45 | 30 | 37  | 40  | 38  | 22 | 41 | 55 |
| SMMPT272 | 15 | 11 | 12 | 15  | 13  | 17  | 18 | 18 | 25 |
| SMMPT273 | 6  | 10 | 7  | 13  | 22  | 13  | 8  | 13 | 7  |
| SMMPT274 | 15 | 15 | 11 | 39  | 54  | 53  | 20 | 31 | 27 |
| SMMPT275 | 12 | 14 | 9  | 160 | 152 | 126 | 75 | 99 | 76 |
| SMMPT276 | 38 | 33 | 33 | 90  | 80  | 69  | 41 | 71 | 59 |
| SMMPT277 | 3  | 5  | 4  | 18  | 16  | 18  | 13 | 11 | 15 |
| SMMPT278 | 13 | 7  | 11 | 76  | 78  | 60  | 24 | 36 | 32 |
| SMMPT279 | 14 | 11 | 16 | 61  | 43  | 37  | 49 | 61 | 57 |
| SMMPT281 | 17 | 9  | 10 | 32  | 15  | 21  | 37 | 31 | 24 |
| SMMPT282 | 17 | 20 | 12 | 24  | 43  | 32  | 31 | 62 | 49 |
| SMMPT283 | 22 | 26 | 16 | 15  | 15  | 11  | 22 | 24 | 14 |
| SMMPT284 | 21 | 9  | 14 | 8   | 15  | 13  | 9  | 22 | 23 |
| SMMPT285 | 12 | 21 | 15 | 21  | 14  | 14  | 18 | 20 | 16 |
| SMMPT286 | 84 | 71 | 75 | 33  | 32  | 31  | 37 | 50 | 71 |
| SMMPT287 | 20 | 17 | 15 | 32  | 18  | 19  | 21 | 21 | 25 |
| SMMPT288 | 33 | 19 | 19 | 71  | 80  | 67  | 29 | 40 | 52 |
| SMMPT289 | 5  | 10 | 7  | 25  | 19  | 16  | 17 | 24 | 10 |
| SMMPT290 | 21 | 24 | 30 | 71  | 67  | 49  | 38 | 58 | 59 |
| SMMPT291 | 17 | 17 | 19 | 26  | 25  | 20  | 19 | 29 | 26 |
| SMMPT292 | 11 | 13 | 10 | 31  | 29  | 13  | 35 | 39 | 23 |
| SMMPT293 | 24 | 21 | 16 | 198 | 159 | 142 | 42 | 98 | 82 |
| SMMPT294 | 8  | 11 | 8  | 7   | 4   | 10  | 9  | 19 | 17 |
| SMMPT295 | 15 | 12 | 13 | 21  | 15  | 20  | 23 | 21 | 20 |
| SMMPT296 | 15 | 18 | 19 | 11  | 14  | 15  | 21 | 20 | 34 |
| SMMPT297 | 12 | 10 | 13 | 11  | 11  | 12  | 16 | 13 | 27 |

|          |     |    |    |     |     |     |     |     |     |
|----------|-----|----|----|-----|-----|-----|-----|-----|-----|
| SMMPT298 | 14  | 20 | 14 | 33  | 28  | 33  | 34  | 37  | 41  |
| SMMPT299 | 28  | 26 | 35 | 45  | 46  | 41  | 43  | 45  | 51  |
| SMMPT300 | 24  | 23 | 23 | 27  | 19  | 22  | 47  | 76  | 83  |
| SMMPT301 | 16  | 10 | 10 | 121 | 123 | 109 | 61  | 58  | 49  |
| SMMPT302 | 18  | 17 | 14 | 24  | 20  | 16  | 23  | 32  | 23  |
| SMMPT303 | 20  | 16 | 18 | 158 | 177 | 117 | 54  | 66  | 81  |
| SMMPT304 | 8   | 13 | 11 | 24  | 27  | 20  | 22  | 22  | 24  |
| SMMPT305 | 24  | 29 | 17 | 50  | 39  | 39  | 37  | 51  | 53  |
| SMMPT306 | 8   | 14 | 4  | 21  | 26  | 13  | 18  | 28  | 14  |
| SMMPT307 | 22  | 12 | 18 | 136 | 124 | 104 | 90  | 97  | 84  |
| SMMPT308 | 24  | 15 | 16 | 192 | 209 | 136 | 92  | 125 | 109 |
| SMMPT309 | 8   | 6  | 4  | 26  | 27  | 18  | 40  | 44  | 43  |
| SMMPT310 | 27  | 34 | 29 | 89  | 88  | 78  | 48  | 59  | 74  |
| SMMPT311 | 14  | 12 | 13 | 15  | 16  | 17  | 11  | 12  | 18  |
| SMMPT312 | 25  | 33 | 21 | 77  | 80  | 61  | 40  | 56  | 59  |
| SMMPT313 | 46  | 59 | 47 | 38  | 34  | 29  | 40  | 64  | 64  |
| SMMPT314 | 17  | 10 | 10 | 163 | 155 | 124 | 50  | 67  | 68  |
| SMMPT315 | 13  | 9  | 12 | 18  | 12  | 16  | 13  | 23  | 20  |
| SMMPT316 | 1   | 1  | 0  | 3   | 1   | 2   | 0   | 2   | 2   |
| SMMPT317 | 24  | 18 | 20 | 62  | 53  | 49  | 45  | 71  | 69  |
| SMMPT318 | 10  | 11 | 9  | 12  | 15  | 8   | 11  | 18  | 12  |
| SMMPT319 | 13  | 8  | 4  | 6   | 5   | 10  | 5   | 7   | 9   |
| SMMPT320 | 26  | 24 | 20 | 213 | 214 | 159 | 104 | 110 | 111 |
| SMMPT321 | 21  | 22 | 19 | 24  | 25  | 24  | 47  | 53  | 60  |
| SMMPT322 | 14  | 10 | 14 | 73  | 59  | 45  | 35  | 48  | 40  |
| SMMPT323 | 12  | 15 | 10 | 30  | 25  | 23  | 41  | 26  | 13  |
| SMMPT324 | 16  | 14 | 14 | 20  | 30  | 23  | 21  | 34  | 25  |
| SMMPT325 | 8   | 6  | 3  | 3   | 4   | 4   | 8   | 5   | 7   |
| SMMPT326 | 11  | 14 | 10 | 16  | 28  | 15  | 22  | 31  | 37  |
| SMMPT327 | 15  | 12 | 11 | 67  | 57  | 49  | 24  | 44  | 33  |
| SMMPT328 | 4   | 11 | 12 | 50  | 35  | 32  | 34  | 42  | 40  |
| SMMPT329 | 102 | 91 | 86 | 175 | 153 | 155 | 125 | 184 | 165 |
| SMMPT330 | 1   | 1  | 2  | 11  | 17  | 9   | 4   | 9   | 11  |
| SMMPT331 | 12  | 7  | 7  | 18  | 21  | 18  | 17  | 17  | 23  |
| SMMPT332 | 17  | 12 | 16 | 22  | 25  | 20  | 21  | 46  | 38  |
| SMMPT333 | 26  | 17 | 24 | 34  | 24  | 22  | 22  | 31  | 34  |
| SMMPT334 | 19  | 15 | 9  | 11  | 12  | 9   | 11  | 12  | 28  |
| SMMPT335 | 36  | 29 | 35 | 65  | 73  | 46  | 44  | 43  | 50  |
| SMMPT336 | 7   | 13 | 11 | 20  | 31  | 20  | 23  | 33  | 42  |
| SMMPT337 | 12  | 9  | 15 | 11  | 10  | 14  | 14  | 23  | 18  |
| SMMPT338 | 18  | 31 | 18 | 19  | 16  | 24  | 28  | 21  | 16  |

|          |    |    |    |     |     |     |     |     |     |
|----------|----|----|----|-----|-----|-----|-----|-----|-----|
| SMMPT339 | 21 | 23 | 15 | 30  | 17  | 25  | 18  | 34  | 20  |
| SMMPT340 | 21 | 30 | 14 | 36  | 37  | 32  | 19  | 32  | 25  |
| SMMPT341 | 17 | 14 | 17 | 230 | 196 | 141 | 158 | 168 | 206 |
| SMMPT342 | 26 | 24 | 23 | 74  | 62  | 68  | 60  | 93  | 93  |
| SMMPT343 | 17 | 13 | 10 | 19  | 22  | 18  | 12  | 16  | 13  |
| SMMPT344 | 11 | 26 | 15 | 25  | 30  | 34  | 10  | 32  | 24  |
| SMMPT345 | 4  | 4  | 5  | 13  | 12  | 10  | 16  | 19  | 22  |
| SMMPT346 | 10 | 24 | 18 | 32  | 16  | 22  | 14  | 25  | 26  |
| SMMPT347 | 4  | 3  | 7  | 5   | 11  | 13  | 8   | 12  | 16  |
| SMMPT348 | 18 | 19 | 21 | 41  | 14  | 23  | 23  | 24  | 36  |
| SMMPT349 | 12 | 23 | 12 | 40  | 42  | 29  | 20  | 28  | 45  |
| SMMPT350 | 28 | 21 | 14 | 194 | 178 | 132 | 147 | 176 | 158 |
| SMMPT351 | 10 | 9  | 11 | 10  | 3   | 9   | 7   | 20  | 14  |
| SMMPT352 | 3  | 3  | 2  | 6   | 11  | 7   | 8   | 17  | 13  |
| SMMPT353 | 23 | 30 | 26 | 30  | 19  | 30  | 26  | 27  | 33  |
| SMMPT354 | 19 | 12 | 19 | 79  | 66  | 50  | 38  | 57  | 47  |
| SMMPT355 | 37 | 27 | 28 | 68  | 57  | 42  | 29  | 38  | 31  |
| SMMPT356 | 16 | 15 | 16 | 101 | 98  | 89  | 42  | 91  | 78  |
| SMMPT357 | 13 | 11 | 10 | 21  | 14  | 19  | 16  | 22  | 19  |
| SMMPT358 | 20 | 20 | 18 | 29  | 33  | 13  | 19  | 29  | 31  |
| SMMPT359 | 19 | 19 | 20 | 95  | 91  | 72  | 38  | 41  | 29  |
| SMMPT360 | 7  | 5  | 7  | 11  | 11  | 6   | 12  | 19  | 15  |
| SMMPT361 | 33 | 25 | 26 | 195 | 176 | 141 | 81  | 110 | 95  |
| SMMPT362 | 4  | 5  | 5  | 4   | 9   | 9   | 7   | 10  | 8   |
| SMMPT363 | 6  | 9  | 9  | 140 | 108 | 78  | 112 | 130 | 139 |
| SMMPT364 | 61 | 63 | 50 | 60  | 51  | 54  | 98  | 111 | 93  |
| SMMPT365 | 7  | 16 | 9  | 96  | 107 | 55  | 41  | 61  | 52  |
| SMMPT366 | 23 | 28 | 16 | 37  | 41  | 29  | 32  | 27  | 42  |
| SMMPT367 | 19 | 12 | 14 | 17  | 24  | 22  | 29  | 29  | 26  |
| SMMPT368 | 16 | 7  | 13 | 10  | 8   | 13  | 21  | 17  | 21  |
| SMMPT369 | 23 | 30 | 17 | 38  | 45  | 32  | 36  | 46  | 45  |
| SMMPT370 | 16 | 17 | 16 | 471 | 399 | 353 | 180 | 235 | 198 |
| SMMPT371 | 29 | 25 | 28 | 22  | 25  | 41  | 32  | 46  | 41  |
| SMMPT372 | 20 | 10 | 6  | 22  | 14  | 21  | 18  | 34  | 32  |
| SMMPT373 | 10 | 5  | 10 | 18  | 6   | 8   | 17  | 16  | 21  |
| SMMPT374 | 11 | 20 | 14 | 125 | 104 | 99  | 43  | 62  | 71  |
| SMMPT375 | 13 | 15 | 9  | 48  | 43  | 39  | 35  | 32  | 27  |
| SMMPT376 | 6  | 5  | 11 | 28  | 23  | 22  | 19  | 15  | 31  |
| SMMPT377 | 25 | 18 | 18 | 61  | 48  | 45  | 31  | 62  | 39  |
| SMMPT378 | 16 | 16 | 16 | 33  | 33  | 28  | 32  | 41  | 39  |
| SMMPT379 | 6  | 8  | 9  | 20  | 17  | 12  | 15  | 15  | 16  |



|          |    |    |    |     |     |     |     |     |     |
|----------|----|----|----|-----|-----|-----|-----|-----|-----|
| SMMPT380 | 30 | 15 | 20 | 16  | 20  | 14  | 23  | 42  | 44  |
| SMMPT381 | 17 | 20 | 14 | 48  | 33  | 32  | 23  | 29  | 33  |
| SMMPT382 | 25 | 23 | 20 | 34  | 21  | 19  | 15  | 41  | 33  |
| SMMPT383 | 18 | 13 | 18 | 44  | 41  | 36  | 43  | 37  | 40  |
| SMMPT384 | 16 | 13 | 14 | 19  | 11  | 21  | 22  | 18  | 22  |
| SMMPT385 | 3  | 4  | 8  | 3   | 4   | 11  | 12  | 10  | 9   |
| SMMPT386 | 16 | 15 | 15 | 11  | 11  | 19  | 14  | 13  | 15  |
| SMMPT387 | 19 | 23 | 10 | 47  | 38  | 39  | 29  | 26  | 30  |
| SMMPT388 | 11 | 20 | 12 | 22  | 24  | 25  | 27  | 32  | 30  |
| SMMPT389 | 26 | 34 | 21 | 30  | 37  | 29  | 29  | 36  | 29  |
| SMMPT390 | 27 | 37 | 28 | 74  | 96  | 57  | 47  | 67  | 48  |
| SMMPT391 | 8  | 10 | 10 | 7   | 4   | 9   | 8   | 8   | 14  |
| SMMPT392 | 75 | 56 | 63 | 22  | 33  | 48  | 47  | 64  | 64  |
| SMMPT393 | 28 | 17 | 13 | 82  | 64  | 48  | 50  | 56  | 54  |
| SMMPT394 | 36 | 37 | 28 | 62  | 40  | 42  | 39  | 44  | 39  |
| SMMPT395 | 12 | 8  | 15 | 22  | 21  | 25  | 20  | 20  | 17  |
| SMMPT396 | 27 | 31 | 33 | 497 | 452 | 340 | 132 | 168 | 173 |
| SMMPT397 | 13 | 19 | 13 | 30  | 27  | 26  | 29  | 28  | 33  |
| SMMPT398 | 11 | 17 | 10 | 34  | 26  | 28  | 15  | 22  | 21  |
| SMMPT399 | 17 | 13 | 15 | 37  | 30  | 22  | 19  | 19  | 22  |
| SMMPT400 | 12 | 8  | 5  | 10  | 8   | 11  | 20  | 11  | 11  |
| SMMPT401 | 17 | 13 | 20 | 20  | 23  | 16  | 26  | 28  | 20  |
| SMMPT402 | 19 | 22 | 20 | 10  | 17  | 14  | 16  | 19  | 18  |
| SMMPT403 | 8  | 12 | 6  | 252 | 203 | 154 | 159 | 203 | 217 |
| SMMPT404 | 17 | 12 | 19 | 26  | 34  | 32  | 27  | 33  | 33  |
| SMMPT405 | 22 | 13 | 23 | 20  | 34  | 27  | 25  | 34  | 21  |
| SMMPT406 | 55 | 46 | 51 | 41  | 30  | 41  | 55  | 61  | 70  |
| SMMPT407 | 7  | 4  | 4  | 9   | 5   | 2   | 5   | 5   | 4   |
| SMMPT408 | 22 | 20 | 21 | 40  | 34  | 34  | 38  | 42  | 53  |
| SMMPT409 | 32 | 34 | 30 | 25  | 10  | 21  | 34  | 45  | 32  |
| SMMPT410 | 3  | 7  | 8  | 9   | 11  | 12  | 20  | 22  | 22  |
| SMMPT411 | 2  | 7  | 6  | 11  | 4   | 3   | 5   | 13  | 3   |
| SMMPT412 | 19 | 14 | 9  | 17  | 19  | 21  | 18  | 18  | 22  |
| SMMPT413 | 20 | 10 | 10 | 9   | 12  | 11  | 5   | 21  | 15  |
| SMMPT414 | 19 | 21 | 19 | 19  | 20  | 14  | 15  | 26  | 28  |
| SMMPT415 | 16 | 16 | 19 | 136 | 141 | 101 | 53  | 69  | 75  |
| SMMPT416 | 37 | 34 | 45 | 44  | 41  | 44  | 57  | 54  | 53  |
| SMMPT417 | 8  | 4  | 12 | 27  | 34  | 21  | 34  | 48  | 46  |
| SMMPT418 | 19 | 28 | 23 | 17  | 21  | 20  | 27  | 31  | 27  |
| SMMPT419 | 23 | 13 | 8  | 23  | 22  | 24  | 32  | 37  | 35  |
| SMMPT420 | 31 | 32 | 26 | 92  | 107 | 67  | 65  | 84  | 74  |

|          |    |    |    |     |     |     |     |     |     |
|----------|----|----|----|-----|-----|-----|-----|-----|-----|
| SMMPT421 | 20 | 22 | 20 | 16  | 27  | 22  | 22  | 27  | 28  |
| SMMPT422 | 7  | 5  | 3  | 19  | 21  | 12  | 11  | 14  | 13  |
| SMMPT423 | 47 | 24 | 31 | 69  | 78  | 64  | 41  | 65  | 46  |
| SMMPT424 | 3  | 6  | 3  | 7   | 7   | 7   | 4   | 10  | 4   |
| SMMPT425 | 7  | 13 | 6  | 49  | 29  | 25  | 31  | 24  | 31  |
| SMMPT426 | 16 | 24 | 13 | 22  | 16  | 11  | 20  | 24  | 20  |
| SMMPT427 | 32 | 21 | 24 | 43  | 33  | 32  | 16  | 60  | 29  |
| SMMPT428 | 26 | 24 | 28 | 31  | 32  | 17  | 28  | 32  | 24  |
| SMMPT429 | 13 | 22 | 19 | 67  | 58  | 52  | 64  | 67  | 70  |
| SMMPT430 | 25 | 14 | 12 | 272 | 294 | 198 | 125 | 171 | 151 |
| SMMPT431 | 9  | 14 | 16 | 13  | 12  | 15  | 9   | 21  | 23  |
| SMMPT432 | 16 | 27 | 13 | 10  | 8   | 15  | 19  | 27  | 30  |
| SMMPT433 | 10 | 14 | 22 | 37  | 35  | 28  | 20  | 35  | 30  |
| SMMPT434 | 9  | 12 | 9  | 32  | 44  | 26  | 38  | 49  | 38  |
| SMMPT435 | 14 | 12 | 9  | 14  | 11  | 13  | 17  | 16  | 19  |
| SMMPT436 | 10 | 13 | 11 | 9   | 16  | 20  | 13  | 19  | 31  |
| SMMPT437 | 4  | 2  | 7  | 37  | 60  | 49  | 20  | 16  | 11  |
| SMMPT438 | 29 | 17 | 22 | 259 | 267 | 198 | 145 | 171 | 136 |
| SMMPT439 | 21 | 21 | 21 | 204 | 172 | 150 | 100 | 109 | 108 |
| SMMPT440 | 22 | 16 | 14 | 28  | 20  | 16  | 28  | 29  | 26  |
| SMMPT441 | 45 | 52 | 54 | 56  | 46  | 43  | 78  | 77  | 92  |
| SMMPT442 | 24 | 25 | 17 | 46  | 32  | 44  | 35  | 41  | 40  |
| SMMPT443 | 11 | 11 | 8  | 21  | 34  | 17  | 28  | 32  | 27  |
| SMMPT444 | 7  | 11 | 9  | 16  | 15  | 21  | 17  | 23  | 25  |
| SMMPT445 | 25 | 27 | 26 | 728 | 678 | 533 | 422 | 502 | 487 |
| SMMPT446 | 11 | 15 | 11 | 7   | 11  | 6   | 24  | 19  | 15  |
| SMMPT447 | 10 | 17 | 9  | 11  | 11  | 13  | 14  | 16  | 19  |
| SMMPT448 | 33 | 23 | 30 | 104 | 114 | 81  | 59  | 96  | 76  |
| SMMPT449 | 27 | 22 | 15 | 26  | 20  | 21  | 14  | 23  | 26  |
| SMMPT450 | 11 | 7  | 11 | 17  | 24  | 10  | 17  | 19  | 24  |
| SMMPT451 | 77 | 96 | 65 | 72  | 62  | 49  | 51  | 79  | 73  |
| SMMPT452 | 16 | 9  | 13 | 43  | 43  | 33  | 25  | 42  | 33  |
| SMMPT453 | 24 | 23 | 18 | 45  | 63  | 22  | 31  | 33  | 36  |
| SMMPT454 | 30 | 40 | 24 | 104 | 102 | 76  | 48  | 57  | 51  |
| SMMPT455 | 11 | 14 | 5  | 54  | 66  | 33  | 24  | 34  | 33  |
| SMMPT456 | 6  | 1  | 2  | 1   | 6   | 5   | 3   | 14  | 6   |
| SMMPT457 | 37 | 28 | 26 | 21  | 8   | 20  | 33  | 52  | 22  |
| SMMPT458 | 13 | 8  | 8  | 13  | 12  | 11  | 8   | 11  | 14  |
| SMMPT459 | 25 | 28 | 23 | 56  | 45  | 60  | 37  | 35  | 45  |
| SMMPT460 | 34 | 20 | 30 | 73  | 46  | 51  | 33  | 37  | 43  |
| SMMPT461 | 10 | 15 | 9  | 44  | 43  | 35  | 26  | 41  | 41  |

|          |    |    |    |     |     |     |    |    |    |
|----------|----|----|----|-----|-----|-----|----|----|----|
| SMMPT462 | 13 | 7  | 10 | 17  | 29  | 17  | 9  | 16 | 19 |
| SMMPT463 | 0  | 1  | 4  | 2   | 3   | 3   | 3  | 1  | 8  |
| SMMPT464 | 15 | 19 | 23 | 94  | 103 | 78  | 57 | 95 | 76 |
| SMMPT465 | 34 | 31 | 25 | 30  | 24  | 30  | 27 | 35 | 31 |
| SMMPT466 | 22 | 23 | 13 | 38  | 43  | 34  | 33 | 30 | 18 |
| SMMPT467 | 20 | 26 | 25 | 50  | 40  | 47  | 41 | 65 | 54 |
| SMMPT468 | 23 | 10 | 11 | 169 | 109 | 119 | 77 | 86 | 95 |
| SMMPT469 | 11 | 17 | 18 | 42  | 29  | 39  | 46 | 28 | 36 |
| SMMPT470 | 18 | 9  | 8  | 17  | 8   | 13  | 21 | 21 | 22 |
| SMMPT471 | 29 | 17 | 20 | 89  | 90  | 58  | 54 | 71 | 54 |
| SMMPT472 | 15 | 15 | 14 | 45  | 42  | 38  | 56 | 56 | 75 |
| SMMPT473 | 24 | 13 | 16 | 18  | 13  | 18  | 28 | 40 | 40 |
| SMMPT474 | 14 | 6  | 9  | 104 | 82  | 66  | 32 | 42 | 36 |
| SMMPT475 | 13 | 19 | 14 | 17  | 21  | 21  | 27 | 33 | 37 |
| SMMPT476 | 12 | 1  | 6  | 10  | 11  | 17  | 19 | 15 | 21 |
| SMMPT477 | 12 | 6  | 10 | 10  | 13  | 7   | 12 | 15 | 12 |
| SMMPT478 | 19 | 17 | 14 | 69  | 71  | 64  | 29 | 46 | 46 |
| SMMPT479 | 12 | 23 | 18 | 21  | 25  | 23  | 32 | 49 | 34 |
| SMMPT480 | 10 | 11 | 10 | 8   | 7   | 9   | 9  | 7  | 17 |
| SMMPT481 | 13 | 12 | 18 | 89  | 74  | 67  | 58 | 71 | 49 |
| SMMPT482 | 13 | 9  | 14 | 37  | 40  | 29  | 20 | 35 | 30 |
| SMMPT483 | 45 | 39 | 22 | 29  | 28  | 29  | 34 | 42 | 43 |
| SMMPT484 | 10 | 12 | 12 | 28  | 23  | 22  | 27 | 38 | 30 |
| SMMPT485 | 26 | 31 | 29 | 65  | 56  | 59  | 49 | 58 | 53 |
| SMMPT486 | 15 | 16 | 15 | 169 | 141 | 101 | 56 | 72 | 66 |
| SMMPT487 | 6  | 5  | 12 | 20  | 14  | 5   | 10 | 19 | 12 |
| SMMPT488 | 14 | 12 | 20 | 52  | 35  | 26  | 33 | 34 | 47 |
| SMMPT489 | 4  | 2  | 3  | 19  | 18  | 17  | 6  | 8  | 11 |
| SMMPT490 | 8  | 3  | 4  | 11  | 10  | 7   | 5  | 8  | 10 |
| SMMPT491 | 6  | 5  | 6  | 9   | 12  | 10  | 17 | 14 | 17 |
| SMMPT492 | 11 | 19 | 10 | 14  | 30  | 19  | 28 | 28 | 23 |
| SMMPT493 | 11 | 7  | 12 | 15  | 16  | 11  | 21 | 14 | 22 |
| SMMPT494 | 15 | 22 | 19 | 15  | 22  | 28  | 26 | 40 | 43 |
| SMMPT495 | 30 | 20 | 22 | 43  | 36  | 29  | 37 | 32 | 39 |
| SMMPT496 | 43 | 48 | 45 | 50  | 42  | 44  | 37 | 49 | 43 |
| SMMPT497 | 15 | 25 | 20 | 24  | 23  | 23  | 13 | 30 | 38 |
| SMMPT498 | 19 | 17 | 20 | 69  | 76  | 59  | 39 | 51 | 57 |
| SMMPT499 | 62 | 76 | 63 | 78  | 80  | 76  | 68 | 88 | 80 |
| SMMPT500 | 28 | 36 | 47 | 57  | 38  | 51  | 44 | 52 | 54 |
| SMMPT501 | 12 | 10 | 11 | 8   | 7   | 10  | 15 | 18 | 14 |
| SMMPT502 | 20 | 10 | 6  | 6   | 14  | 15  | 29 | 30 | 39 |

|          |    |    |    |     |     |     |     |     |     |
|----------|----|----|----|-----|-----|-----|-----|-----|-----|
| SMMPT503 | 17 | 26 | 18 | 23  | 23  | 21  | 24  | 26  | 29  |
| SMMPT504 | 8  | 6  | 12 | 19  | 17  | 15  | 10  | 15  | 24  |
| SMMPT505 | 23 | 39 | 29 | 45  | 42  | 39  | 47  | 41  | 36  |
| SMMPT506 | 23 | 32 | 24 | 14  | 12  | 20  | 22  | 22  | 29  |
| SMMPT507 | 21 | 21 | 17 | 15  | 9   | 14  | 21  | 22  | 31  |
| SMMPT508 | 23 | 14 | 12 | 14  | 19  | 14  | 21  | 29  | 27  |
| SMMPT509 | 29 | 31 | 25 | 90  | 77  | 78  | 25  | 57  | 36  |
| SMMPT510 | 32 | 31 | 30 | 65  | 53  | 46  | 47  | 76  | 78  |
| SMMPT511 | 15 | 13 | 16 | 195 | 192 | 117 | 79  | 105 | 88  |
| SMMPT512 | 30 | 30 | 24 | 63  | 39  | 47  | 36  | 58  | 60  |
| SMMPT513 | 6  | 5  | 5  | 40  | 26  | 18  | 26  | 37  | 14  |
| SMMPT514 | 5  | 4  | 0  | 26  | 39  | 26  | 21  | 28  | 30  |
| SMMPT515 | 7  | 11 | 10 | 45  | 43  | 33  | 23  | 38  | 25  |
| SMMPT516 | 9  | 6  | 7  | 10  | 4   | 4   | 4   | 8   | 10  |
| SMMPT517 | 17 | 11 | 13 | 24  | 34  | 25  | 36  | 54  | 39  |
| SMMPT518 | 13 | 9  | 15 | 26  | 14  | 13  | 17  | 18  | 24  |
| SMMPT519 | 8  | 10 | 8  | 22  | 22  | 22  | 34  | 51  | 46  |
| SMMPT520 | 7  | 8  | 3  | 21  | 29  | 31  | 7   | 17  | 3   |
| SMMPT521 | 36 | 23 | 24 | 44  | 45  | 23  | 29  | 36  | 36  |
| SMMPT522 | 10 | 9  | 15 | 45  | 44  | 36  | 42  | 51  | 57  |
| SMMPT523 | 38 | 28 | 35 | 54  | 53  | 63  | 35  | 58  | 62  |
| SMMPT524 | 14 | 23 | 9  | 18  | 18  | 16  | 18  | 15  | 27  |
| SMMPT525 | 29 | 21 | 28 | 56  | 36  | 30  | 28  | 29  | 60  |
| SMMPT526 | 4  | 2  | 9  | 7   | 15  | 10  | 8   | 12  | 16  |
| SMMPT527 | 16 | 11 | 16 | 20  | 22  | 31  | 14  | 35  | 18  |
| SMMPT528 | 32 | 43 | 35 | 302 | 241 | 216 | 144 | 238 | 192 |
| SMMPT529 | 17 | 17 | 18 | 14  | 23  | 31  | 15  | 29  | 24  |
| SMMPT530 | 6  | 6  | 15 | 14  | 9   | 4   | 12  | 20  | 15  |
| SMMPT531 | 48 | 47 | 41 | 89  | 77  | 74  | 31  | 40  | 43  |
| SMMPT532 | 16 | 26 | 16 | 265 | 237 | 200 | 162 | 197 | 181 |
| SMMPT533 | 26 | 18 | 18 | 28  | 24  | 20  | 27  | 25  | 35  |
| SMMPT534 | 20 | 21 | 17 | 40  | 45  | 29  | 26  | 34  | 39  |
| SMMPT535 | 14 | 10 | 11 | 17  | 13  | 17  | 27  | 22  | 22  |
| SMMPT536 | 10 | 9  | 8  | 8   | 8   | 6   | 6   | 20  | 23  |
| SMMPT537 | 6  | 3  | 8  | 16  | 15  | 10  | 10  | 12  | 6   |
| SMMPT538 | 15 | 19 | 18 | 34  | 32  | 27  | 27  | 34  | 32  |
| SMMPT539 | 8  | 7  | 14 | 11  | 26  | 14  | 22  | 37  | 26  |
| SMMPT540 | 12 | 23 | 23 | 54  | 50  | 47  | 26  | 59  | 47  |
| SMMPT541 | 7  | 4  | 6  | 45  | 34  | 27  | 23  | 27  | 25  |
| SMMPT542 | 10 | 9  | 8  | 27  | 31  | 25  | 23  | 27  | 28  |
| SMMPT543 | 16 | 19 | 17 | 44  | 38  | 25  | 33  | 42  | 36  |

|          |    |    |    |     |     |     |    |     |     |
|----------|----|----|----|-----|-----|-----|----|-----|-----|
| SMMPT544 | 2  | 0  | 3  | 61  | 61  | 61  | 83 | 76  | 110 |
| SMMPT545 | 23 | 25 | 10 | 18  | 15  | 10  | 23 | 33  | 17  |
| SMMPT546 | 6  | 14 | 12 | 29  | 30  | 26  | 18 | 19  | 14  |
| SMMPT547 | 11 | 14 | 8  | 12  | 15  | 6   | 11 | 14  | 13  |
| SMMPT548 | 22 | 18 | 19 | 15  | 19  | 16  | 30 | 32  | 34  |
| SMMPT549 | 20 | 16 | 17 | 25  | 23  | 20  | 25 | 31  | 28  |
| SMMPT550 | 11 | 7  | 18 | 20  | 18  | 19  | 15 | 24  | 24  |
| SMMPT551 | 18 | 21 | 20 | 16  | 10  | 12  | 17 | 13  | 27  |
| SMMPT552 | 6  | 9  | 11 | 44  | 70  | 49  | 28 | 42  | 33  |
| SMMPT553 | 17 | 17 | 20 | 8   | 8   | 11  | 18 | 25  | 31  |
| SMMPT554 | 33 | 29 | 26 | 27  | 41  | 30  | 15 | 22  | 40  |
| SMMPT555 | 8  | 21 | 18 | 8   | 13  | 12  | 24 | 15  | 29  |
| SMMPT556 | 16 | 14 | 19 | 65  | 58  | 43  | 34 | 39  | 54  |
| SMMPT557 | 17 | 9  | 11 | 7   | 10  | 10  | 21 | 24  | 17  |
| SMMPT558 | 25 | 25 | 23 | 158 | 145 | 137 | 59 | 85  | 68  |
| SMMPT559 | 17 | 19 | 21 | 15  | 16  | 16  | 20 | 21  | 25  |
| SMMPT560 | 16 | 6  | 11 | 13  | 19  | 20  | 23 | 27  | 30  |
| SMMPT561 | 15 | 22 | 18 | 15  | 18  | 24  | 25 | 22  | 26  |
| SMMPT562 | 25 | 20 | 21 | 36  | 47  | 41  | 22 | 32  | 40  |
| SMMPT563 | 20 | 26 | 17 | 34  | 30  | 27  | 29 | 35  | 37  |
| SMMPT564 | 35 | 36 | 42 | 146 | 147 | 138 | 73 | 97  | 91  |
| SMMPT565 | 36 | 32 | 27 | 25  | 22  | 26  | 25 | 46  | 40  |
| SMMPT566 | 19 | 10 | 11 | 55  | 47  | 50  | 39 | 40  | 46  |
| SMMPT567 | 5  | 14 | 6  | 79  | 77  | 55  | 59 | 75  | 63  |
| SMMPT568 | 18 | 27 | 24 | 23  | 34  | 17  | 24 | 33  | 48  |
| SMMPT569 | 27 | 30 | 24 | 124 | 119 | 75  | 56 | 93  | 77  |
| SMMPT570 | 10 | 7  | 12 | 150 | 110 | 80  | 92 | 139 | 91  |
| SMMPT571 | 10 | 18 | 9  | 17  | 21  | 21  | 12 | 17  | 16  |
| SMMPT572 | 12 | 16 | 15 | 4   | 8   | 6   | 2  | 11  | 7   |
| SMMPT573 | 62 | 63 | 71 | 62  | 70  | 55  | 77 | 106 | 110 |
| SMMPT574 | 4  | 8  | 13 | 8   | 7   | 4   | 4  | 9   | 9   |
| SMMPT575 | 16 | 18 | 17 | 89  | 86  | 76  | 42 | 54  | 65  |
| SMMPT576 | 18 | 19 | 24 | 120 | 96  | 88  | 45 | 56  | 63  |
| SMMPT577 | 8  | 10 | 8  | 56  | 42  | 40  | 48 | 50  | 41  |
| SMMPT578 | 39 | 49 | 46 | 73  | 52  | 43  | 58 | 64  | 73  |
| SMMPT579 | 17 | 17 | 14 | 108 | 89  | 82  | 31 | 60  | 39  |
| SMMPT580 | 19 | 18 | 17 | 25  | 27  | 24  | 30 | 32  | 31  |
| SMMPT581 | 9  | 12 | 9  | 21  | 34  | 19  | 24 | 20  | 23  |
| SMMPT582 | 0  | 0  | 0  | 2   | 0   | 0   | 0  | 0   | 0   |
| SMMPT583 | 9  | 15 | 16 | 23  | 24  | 29  | 18 | 20  | 25  |
| SMMPT584 | 9  | 9  | 13 | 53  | 35  | 34  | 15 | 29  | 39  |

|                |      |      |      |     |     |     |      |      |      |
|----------------|------|------|------|-----|-----|-----|------|------|------|
| SMMPT585       | 14   | 19   | 11   | 5   | 9   | 10  | 14   | 25   | 18   |
| SMMPT586       | 5    | 9    | 11   | 25  | 31  | 19  | 24   | 30   | 23   |
| SMMPT587       | 12   | 24   | 12   | 16  | 18  | 13  | 17   | 22   | 27   |
| SMMPT588       | 14   | 14   | 14   | 22  | 36  | 31  | 18   | 25   | 20   |
| SMMPT589       | 15   | 12   | 12   | 65  | 82  | 58  | 37   | 56   | 49   |
| SMMPT590       | 24   | 20   | 30   | 11  | 18  | 27  | 26   | 29   | 38   |
| SMMPT591       | 10   | 12   | 6    | 21  | 14  | 19  | 24   | 33   | 32   |
| SMMPT592       | 12   | 17   | 16   | 25  | 23  | 33  | 29   | 32   | 33   |
| SMMPT593       | 4    | 5    | 4    | 21  | 19  | 19  | 13   | 14   | 19   |
| SMMPT594       | 23   | 23   | 8    | 13  | 14  | 13  | 14   | 25   | 18   |
| SMMPT595       | 6    | 4    | 3    | 143 | 122 | 114 | 99   | 129  | 87   |
| SMMPT596       | 13   | 21   | 14   | 23  | 29  | 16  | 21   | 29   | 28   |
| SMMPT597       | 21   | 21   | 21   | 57  | 56  | 38  | 40   | 47   | 47   |
| SMMPT598       | 6    | 3    | 4    | 18  | 15  | 12  | 9    | 14   | 13   |
| SMMPT599       | 11   | 15   | 13   | 12  | 18  | 10  | 15   | 18   | 14   |
| Internal_Stand | 8171 | 9075 | 7943 | 785 | 762 | 949 | 3239 | 3621 | 4098 |
| Internal_Stand | 6136 | 6625 | 6031 | 701 | 619 | 860 | 2657 | 2908 | 3313 |
| Internal_Stand | 7752 | 8446 | 7568 | 780 | 746 | 910 | 2866 | 3359 | 3674 |
| Internal_Stand | 6066 | 6716 | 6065 | 548 | 581 | 772 | 2411 | 2641 | 3033 |
| Internal_Stand | 5784 | 6118 | 5531 | 587 | 548 | 835 | 2373 | 2809 | 3094 |
| Internal_Stand | 6131 | 6635 | 6012 | 570 | 477 | 790 | 2299 | 2610 | 2974 |

| FRA3_0.04<br>$\mu\text{M}_1$ | FRA3_0.04<br>$\mu\text{M}_2$ | FRA3_0.04<br>$\mu\text{M}_3$ | MPII_4<br>$\mu\text{M}_1$ | MPII_4<br>$\mu\text{M}_2$ | MPII_4<br>$\mu\text{M}_3$ | MPII_0.<br>4 $\mu\text{M}_1$ | MPII_0.<br>4 $\mu\text{M}_2$ | MPII_0.4<br>$\mu\text{M}_3$ | MPII_0.0<br>4 $\mu\text{M}_1$ |
|------------------------------|------------------------------|------------------------------|---------------------------|---------------------------|---------------------------|------------------------------|------------------------------|-----------------------------|-------------------------------|
| 17                           | 18                           | 17                           | 27                        | 32                        | 25                        | 23                           | 15                           | 11                          | 13                            |
| 42                           | 44                           | 61                           | 66                        | 88                        | 97                        | 102                          | 112                          | 121                         | 67                            |
| 57                           | 41                           | 58                           | 80                        | 105                       | 89                        | 97                           | 110                          | 108                         | 65                            |
| 60                           | 56                           | 63                           | 59                        | 73                        | 69                        | 92                           | 93                           | 77                          | 58                            |
| 23                           | 25                           | 26                           | 38                        | 42                        | 43                        | 24                           | 18                           | 27                          | 24                            |
| 35                           | 31                           | 16                           | 27                        | 40                        | 33                        | 35                           | 27                           | 27                          | 33                            |
| 22                           | 25                           | 31                           | 49                        | 37                        | 29                        | 39                           | 48                           | 48                          | 31                            |
| 40                           | 43                           | 54                           | 23                        | 17                        | 17                        | 24                           | 23                           | 27                          | 33                            |
| 29                           | 36                           | 38                           | 33                        | 39                        | 45                        | 23                           | 24                           | 28                          | 31                            |
| 29                           | 23                           | 37                           | 23                        | 33                        | 28                        | 26                           | 30                           | 24                          | 33                            |
| 26                           | 21                           | 18                           | 3                         | 3                         | 4                         | 8                            | 12                           | 5                           | 14                            |
| 28                           | 32                           | 56                           | 26                        | 45                        | 30                        | 30                           | 30                           | 28                          | 51                            |
| 26                           | 25                           | 19                           | 15                        | 13                        | 11                        | 10                           | 9                            | 15                          | 14                            |
| 29                           | 36                           | 46                           | 27                        | 31                        | 25                        | 33                           | 20                           | 28                          | 18                            |
| 68                           | 55                           | 46                           | 43                        | 63                        | 46                        | 55                           | 41                           | 57                          | 46                            |
| 37                           | 33                           | 39                           | 26                        | 40                        | 38                        | 37                           | 30                           | 21                          | 30                            |
| 24                           | 15                           | 25                           | 163                       | 173                       | 152                       | 74                           | 69                           | 88                          | 53                            |
| 21                           | 30                           | 41                           | 16                        | 35                        | 29                        | 33                           | 13                           | 15                          | 15                            |
| 38                           | 38                           | 39                           | 51                        | 64                        | 53                        | 54                           | 49                           | 55                          | 36                            |
| 56                           | 75                           | 81                           | 78                        | 117                       | 134                       | 155                          | 101                          | 140                         | 95                            |
| 26                           | 45                           | 19                           | 33                        | 52                        | 43                        | 30                           | 49                           | 48                          | 27                            |
| 101                          | 85                           | 95                           | 96                        | 111                       | 120                       | 139                          | 131                          | 128                         | 101                           |
| 77                           | 118                          | 113                          | 70                        | 87                        | 71                        | 118                          | 113                          | 134                         | 98                            |
| 7                            | 12                           | 13                           | 18                        | 12                        | 6                         | 21                           | 13                           | 11                          | 9                             |
| 35                           | 31                           | 58                           | 50                        | 43                        | 52                        | 41                           | 39                           | 66                          | 26                            |
| 39                           | 27                           | 25                           | 25                        | 40                        | 30                        | 36                           | 34                           | 43                          | 14                            |
| 16                           | 16                           | 33                           | 24                        | 18                        | 19                        | 24                           | 21                           | 19                          | 25                            |
| 8                            | 14                           | 5                            | 15                        | 11                        | 9                         | 15                           | 9                            | 14                          | 12                            |
| 22                           | 19                           | 27                           | 15                        | 20                        | 27                        | 17                           | 18                           | 20                          | 24                            |
| 20                           | 16                           | 26                           | 20                        | 20                        | 27                        | 23                           | 18                           | 20                          | 11                            |
| 29                           | 16                           | 14                           | 29                        | 44                        | 48                        | 31                           | 41                           | 48                          | 31                            |
| 28                           | 25                           | 20                           | 9                         | 18                        | 17                        | 20                           | 16                           | 23                          | 23                            |
| 40                           | 28                           | 53                           | 17                        | 22                        | 21                        | 25                           | 18                           | 29                          | 27                            |
| 230                          | 222                          | 258                          | 196                       | 256                       | 245                       | 405                          | 329                          | 387                         | 256                           |
| 75                           | 59                           | 90                           | 67                        | 89                        | 77                        | 132                          | 107                          | 103                         | 101                           |
| 100                          | 97                           | 113                          | 104                       | 153                       | 117                       | 162                          | 139                          | 162                         | 132                           |

|    |    |    |     |     |     |     |     |     |    |
|----|----|----|-----|-----|-----|-----|-----|-----|----|
| 17 | 18 | 14 | 4   | 8   | 5   | 7   | 1   | 5   | 7  |
| 31 | 28 | 38 | 25  | 21  | 17  | 15  | 19  | 19  | 31 |
| 32 | 24 | 25 | 13  | 20  | 21  | 16  | 9   | 17  | 27 |
| 40 | 31 | 36 | 28  | 29  | 39  | 29  | 26  | 49  | 43 |
| 37 | 26 | 26 | 22  | 34  | 26  | 37  | 32  | 22  | 32 |
| 37 | 59 | 45 | 67  | 84  | 61  | 46  | 44  | 42  | 41 |
| 44 | 38 | 38 | 34  | 44  | 48  | 39  | 38  | 38  | 40 |
| 23 | 18 | 36 | 14  | 11  | 9   | 5   | 8   | 13  | 15 |
| 13 | 21 | 28 | 70  | 53  | 54  | 42  | 32  | 37  | 14 |
| 45 | 61 | 47 | 46  | 53  | 54  | 43  | 42  | 36  | 42 |
| 16 | 25 | 20 | 20  | 22  | 35  | 19  | 14  | 15  | 21 |
| 24 | 21 | 21 | 22  | 15  | 34  | 14  | 26  | 12  | 15 |
| 30 | 38 | 46 | 33  | 28  | 28  | 32  | 29  | 31  | 47 |
| 22 | 31 | 24 | 19  | 17  | 18  | 10  | 13  | 16  | 19 |
| 32 | 31 | 31 | 9   | 27  | 25  | 21  | 24  | 24  | 21 |
| 30 | 25 | 26 | 34  | 22  | 31  | 17  | 20  | 22  | 25 |
| 11 | 10 | 13 | 14  | 15  | 13  | 11  | 15  | 14  | 11 |
| 29 | 47 | 42 | 74  | 77  | 117 | 110 | 119 | 102 | 73 |
| 21 | 21 | 20 | 34  | 50  | 37  | 19  | 23  | 22  | 15 |
| 30 | 38 | 28 | 24  | 32  | 16  | 18  | 19  | 22  | 33 |
| 34 | 49 | 43 | 18  | 25  | 23  | 37  | 32  | 31  | 32 |
| 21 | 25 | 32 | 14  | 19  | 21  | 14  | 6   | 9   | 21 |
| 43 | 34 | 48 | 49  | 70  | 51  | 82  | 55  | 69  | 46 |
| 20 | 18 | 35 | 14  | 32  | 23  | 24  | 28  | 22  | 16 |
| 25 | 27 | 35 | 30  | 29  | 23  | 18  | 17  | 21  | 24 |
| 31 | 19 | 27 | 36  | 35  | 30  | 43  | 35  | 44  | 22 |
| 22 | 29 | 21 | 18  | 23  | 26  | 20  | 9   | 25  | 30 |
| 26 | 59 | 38 | 43  | 65  | 52  | 52  | 40  | 46  | 39 |
| 59 | 50 | 65 | 52  | 72  | 57  | 59  | 48  | 43  | 57 |
| 38 | 36 | 39 | 72  | 76  | 51  | 87  | 76  | 72  | 52 |
| 31 | 18 | 39 | 25  | 41  | 36  | 30  | 30  | 30  | 19 |
| 29 | 26 | 24 | 25  | 37  | 23  | 16  | 25  | 22  | 16 |
| 70 | 75 | 79 | 134 | 194 | 145 | 137 | 146 | 141 | 66 |
| 32 | 40 | 46 | 71  | 76  | 72  | 52  | 52  | 53  | 37 |
| 61 | 75 | 79 | 55  | 84  | 72  | 109 | 96  | 100 | 64 |
| 6  | 7  | 5  | 11  | 26  | 11  | 14  | 11  | 10  | 6  |
| 56 | 60 | 63 | 48  | 60  | 58  | 87  | 91  | 95  | 56 |
| 34 | 41 | 38 | 6   | 7   | 5   | 10  | 6   | 10  | 21 |
| 25 | 25 | 25 | 18  | 41  | 24  | 27  | 26  | 31  | 19 |
| 40 | 66 | 53 | 34  | 60  | 54  | 49  | 60  | 50  | 40 |
| 40 | 47 | 56 | 53  | 48  | 52  | 42  | 31  | 35  | 40 |



|     |     |     |     |     |     |     |     |     |    |
|-----|-----|-----|-----|-----|-----|-----|-----|-----|----|
| 21  | 16  | 25  | 10  | 10  | 15  | 24  | 15  | 29  | 11 |
| 46  | 42  | 56  | 87  | 114 | 98  | 134 | 127 | 140 | 74 |
| 39  | 45  | 59  | 29  | 48  | 43  | 48  | 36  | 29  | 21 |
| 29  | 36  | 31  | 13  | 16  | 16  | 23  | 14  | 17  | 13 |
| 14  | 17  | 16  | 27  | 37  | 35  | 13  | 13  | 12  | 13 |
| 60  | 54  | 67  | 154 | 159 | 176 | 170 | 149 | 206 | 89 |
| 44  | 47  | 49  | 51  | 87  | 71  | 51  | 51  | 54  | 40 |
| 36  | 40  | 32  | 26  | 36  | 40  | 30  | 16  | 26  | 29 |
| 49  | 51  | 50  | 56  | 73  | 55  | 45  | 54  | 49  | 45 |
| 27  | 27  | 37  | 28  | 42  | 26  | 28  | 31  | 14  | 28 |
| 25  | 27  | 44  | 6   | 11  | 6   | 13  | 12  | 13  | 32 |
| 24  | 22  | 30  | 27  | 19  | 21  | 22  | 32  | 16  | 23 |
| 38  | 37  | 42  | 22  | 36  | 16  | 32  | 24  | 32  | 30 |
| 42  | 49  | 56  | 12  | 21  | 5   | 27  | 25  | 23  | 29 |
| 45  | 37  | 35  | 43  | 48  | 51  | 65  | 49  | 45  | 38 |
| 52  | 37  | 40  | 13  | 12  | 8   | 18  | 21  | 26  | 30 |
| 42  | 46  | 41  | 34  | 53  | 40  | 40  | 44  | 40  | 45 |
| 27  | 26  | 29  | 24  | 28  | 15  | 20  | 24  | 22  | 18 |
| 30  | 27  | 33  | 31  | 38  | 32  | 26  | 24  | 32  | 16 |
| 33  | 38  | 32  | 42  | 45  | 48  | 27  | 30  | 35  | 31 |
| 117 | 102 | 130 | 80  | 96  | 61  | 128 | 115 | 115 | 92 |
| 32  | 32  | 42  | 25  | 29  | 16  | 26  | 19  | 24  | 35 |
| 11  | 13  | 9   | 11  | 8   | 9   | 6   | 9   | 14  | 8  |
| 52  | 49  | 49  | 48  | 65  | 72  | 86  | 63  | 83  | 52 |
| 30  | 40  | 41  | 17  | 9   | 11  | 16  | 15  | 17  | 30 |
| 35  | 23  | 50  | 24  | 32  | 28  | 28  | 20  | 26  | 37 |
| 31  | 41  | 52  | 30  | 50  | 50  | 40  | 23  | 28  | 28 |
| 47  | 44  | 58  | 67  | 79  | 58  | 56  | 49  | 50  | 44 |
| 13  | 13  | 13  | 9   | 12  | 10  | 5   | 17  | 5   | 4  |
| 16  | 14  | 19  | 16  | 25  | 15  | 16  | 12  | 20  | 14 |
| 45  | 47  | 55  | 27  | 34  | 38  | 42  | 34  | 48  | 57 |
| 30  | 29  | 26  | 177 | 223 | 168 | 128 | 127 | 140 | 37 |
| 36  | 39  | 38  | 72  | 83  | 70  | 82  | 63  | 71  | 43 |
| 53  | 58  | 60  | 92  | 91  | 81  | 79  | 64  | 66  | 60 |
| 31  | 40  | 47  | 51  | 58  | 64  | 67  | 55  | 59  | 35 |
| 26  | 32  | 26  | 34  | 47  | 32  | 66  | 52  | 57  | 32 |
| 41  | 38  | 39  | 44  | 71  | 63  | 31  | 42  | 40  | 23 |
| 28  | 31  | 32  | 24  | 31  | 17  | 32  | 29  | 33  | 23 |
| 55  | 55  | 52  | 19  | 21  | 23  | 43  | 46  | 41  | 43 |
| 29  | 18  | 29  | 36  | 43  | 41  | 27  | 29  | 39  | 22 |
| 40  | 46  | 46  | 25  | 30  | 24  | 36  | 41  | 33  | 35 |

|     |     |     |     |     |     |     |     |     |     |
|-----|-----|-----|-----|-----|-----|-----|-----|-----|-----|
| 31  | 28  | 33  | 25  | 28  | 20  | 18  | 31  | 18  | 25  |
| 28  | 29  | 36  | 24  | 37  | 33  | 39  | 35  | 37  | 39  |
| 24  | 24  | 41  | 10  | 11  | 10  | 19  | 5   | 16  | 25  |
| 22  | 20  | 25  | 10  | 9   | 3   | 10  | 6   | 3   | 8   |
| 23  | 32  | 12  | 20  | 27  | 26  | 28  | 14  | 15  | 16  |
| 32  | 35  | 35  | 47  | 69  | 52  | 55  | 44  | 52  | 26  |
| 23  | 19  | 20  | 10  | 26  | 19  | 20  | 16  | 20  | 20  |
| 46  | 39  | 53  | 44  | 56  | 56  | 29  | 33  | 52  | 38  |
| 39  | 37  | 33  | 49  | 61  | 53  | 49  | 51  | 75  | 60  |
| 61  | 81  | 73  | 20  | 33  | 47  | 49  | 55  | 62  | 57  |
| 39  | 41  | 48  | 11  | 21  | 16  | 29  | 24  | 19  | 37  |
| 67  | 72  | 73  | 88  | 156 | 117 | 125 | 96  | 92  | 53  |
| 42  | 46  | 36  | 29  | 33  | 29  | 31  | 20  | 20  | 32  |
| 46  | 66  | 81  | 26  | 30  | 27  | 40  | 38  | 40  | 52  |
| 26  | 19  | 23  | 85  | 110 | 98  | 138 | 121 | 134 | 61  |
| 14  | 11  | 14  | 14  | 11  | 21  | 16  | 5   | 9   | 15  |
| 34  | 32  | 36  | 31  | 40  | 33  | 39  | 47  | 42  | 34  |
| 17  | 21  | 28  | 23  | 17  | 28  | 32  | 38  | 36  | 18  |
| 46  | 40  | 31  | 49  | 51  | 59  | 75  | 75  | 89  | 49  |
| 54  | 62  | 59  | 71  | 72  | 71  | 76  | 91  | 78  | 58  |
| 17  | 23  | 21  | 76  | 113 | 97  | 64  | 71  | 57  | 46  |
| 76  | 76  | 78  | 109 | 126 | 110 | 164 | 142 | 155 | 96  |
| 26  | 39  | 41  | 44  | 57  | 52  | 50  | 63  | 60  | 44  |
| 36  | 21  | 32  | 24  | 25  | 20  | 21  | 24  | 23  | 20  |
| 36  | 45  | 41  | 50  | 67  | 54  | 60  | 49  | 55  | 41  |
| 104 | 132 | 157 | 55  | 65  | 61  | 104 | 80  | 92  | 109 |
| 22  | 28  | 28  | 11  | 20  | 15  | 12  | 19  | 13  | 29  |
| 61  | 65  | 54  | 104 | 127 | 113 | 144 | 120 | 127 | 73  |
| 37  | 37  | 39  | 34  | 46  | 50  | 35  | 28  | 34  | 26  |
| 48  | 26  | 33  | 36  | 61  | 40  | 46  | 36  | 40  | 27  |
| 6   | 13  | 10  | 9   | 10  | 9   | 3   | 2   | 3   | 8   |
| 66  | 65  | 54  | 73  | 104 | 104 | 72  | 71  | 88  | 54  |
| 39  | 21  | 32  | 50  | 79  | 65  | 36  | 37  | 43  | 28  |
| 19  | 29  | 22  | 10  | 10  | 13  | 14  | 9   | 15  | 16  |
| 24  | 18  | 16  | 23  | 35  | 21  | 24  | 24  | 29  | 29  |
| 61  | 58  | 84  | 65  | 65  | 63  | 34  | 42  | 34  | 51  |
| 37  | 46  | 58  | 93  | 116 | 96  | 90  | 72  | 84  | 61  |
| 75  | 61  | 69  | 77  | 97  | 103 | 85  | 67  | 80  | 86  |
| 9   | 13  | 14  | 3   | 7   | 10  | 8   | 15  | 13  | 15  |
| 39  | 34  | 50  | 57  | 92  | 78  | 61  | 50  | 54  | 37  |
| 58  | 55  | 73  | 61  | 61  | 68  | 38  | 48  | 50  | 50  |

|     |     |     |     |     |     |     |     |     |    |
|-----|-----|-----|-----|-----|-----|-----|-----|-----|----|
| 57  | 73  | 70  | 119 | 137 | 142 | 168 | 157 | 161 | 90 |
| 45  | 48  | 55  | 60  | 58  | 63  | 59  | 45  | 60  | 61 |
| 76  | 69  | 98  | 94  | 119 | 107 | 135 | 119 | 96  | 68 |
| 36  | 36  | 48  | 98  | 122 | 101 | 124 | 101 | 103 | 51 |
| 24  | 39  | 34  | 37  | 35  | 35  | 42  | 34  | 39  | 25 |
| 33  | 47  | 44  | 28  | 51  | 38  | 51  | 36  | 56  | 37 |
| 38  | 41  | 32  | 8   | 12  | 16  | 18  | 17  | 21  | 27 |
| 82  | 85  | 77  | 74  | 86  | 67  | 135 | 143 | 117 | 69 |
| 68  | 55  | 66  | 64  | 66  | 58  | 101 | 66  | 89  | 49 |
| 19  | 23  | 26  | 20  | 24  | 24  | 23  | 18  | 33  | 24 |
| 46  | 41  | 47  | 82  | 81  | 75  | 100 | 80  | 83  | 48 |
| 77  | 71  | 70  | 79  | 96  | 72  | 99  | 114 | 132 | 73 |
| 38  | 48  | 60  | 56  | 84  | 73  | 63  | 62  | 82  | 53 |
| 25  | 45  | 24  | 73  | 101 | 97  | 78  | 44  | 60  | 36 |
| 67  | 59  | 76  | 52  | 58  | 68  | 94  | 91  | 83  | 80 |
| 78  | 105 | 98  | 120 | 144 | 98  | 144 | 119 | 113 | 92 |
| 33  | 47  | 44  | 17  | 36  | 28  | 35  | 30  | 30  | 43 |
| 20  | 23  | 33  | 32  | 60  | 63  | 52  | 51  | 48  | 27 |
| 67  | 73  | 68  | 70  | 68  | 72  | 109 | 104 | 95  | 73 |
| 138 | 190 | 157 | 90  | 106 | 104 | 91  | 65  | 83  | 91 |
| 53  | 42  | 42  | 38  | 38  | 46  | 34  | 35  | 43  | 39 |
| 44  | 54  | 50  | 76  | 98  | 77  | 110 | 82  | 92  | 51 |
| 59  | 48  | 72  | 56  | 70  | 58  | 83  | 84  | 108 | 53 |
| 39  | 49  | 44  | 24  | 24  | 27  | 19  | 30  | 19  | 32 |
| 50  | 44  | 57  | 80  | 111 | 85  | 102 | 103 | 111 | 47 |
| 35  | 30  | 41  | 51  | 49  | 65  | 58  | 40  | 43  | 33 |
| 6   | 8   | 23  | 37  | 52  | 39  | 16  | 20  | 22  | 10 |
| 18  | 34  | 35  | 32  | 46  | 44  | 54  | 33  | 49  | 29 |
| 63  | 67  | 73  | 98  | 125 | 124 | 175 | 164 | 160 | 85 |
| 69  | 73  | 88  | 107 | 135 | 99  | 133 | 119 | 146 | 72 |
| 43  | 51  | 61  | 68  | 90  | 83  | 89  | 99  | 103 | 58 |
| 47  | 49  | 60  | 36  | 28  | 33  | 34  | 25  | 37  | 43 |
| 65  | 53  | 38  | 105 | 124 | 105 | 117 | 93  | 118 | 56 |
| 34  | 40  | 37  | 108 | 136 | 122 | 128 | 147 | 154 | 84 |
| 31  | 27  | 27  | 29  | 45  | 35  | 16  | 13  | 28  | 17 |
| 34  | 29  | 32  | 24  | 27  | 18  | 24  | 21  | 21  | 22 |
| 29  | 27  | 32  | 78  | 85  | 65  | 67  | 58  | 62  | 44 |
| 44  | 43  | 49  | 114 | 142 | 126 | 135 | 142 | 175 | 64 |
| 48  | 68  | 64  | 77  | 85  | 75  | 83  | 83  | 78  | 64 |
| 52  | 61  | 59  | 97  | 110 | 89  | 92  | 89  | 103 | 61 |
| 51  | 40  | 50  | 17  | 23  | 20  | 28  | 33  | 37  | 41 |

|     |     |     |     |     |     |     |     |     |     |
|-----|-----|-----|-----|-----|-----|-----|-----|-----|-----|
| 24  | 20  | 23  | 22  | 22  | 18  | 18  | 20  | 19  | 19  |
| 42  | 38  | 39  | 43  | 55  | 43  | 85  | 67  | 83  | 51  |
| 89  | 96  | 122 | 80  | 97  | 101 | 122 | 119 | 150 | 92  |
| 50  | 48  | 46  | 140 | 204 | 173 | 189 | 178 | 195 | 73  |
| 50  | 60  | 59  | 46  | 55  | 48  | 46  | 33  | 56  | 56  |
| 39  | 43  | 57  | 36  | 33  | 40  | 46  | 51  | 52  | 44  |
| 45  | 49  | 50  | 36  | 47  | 28  | 43  | 30  | 41  | 31  |
| 216 | 246 | 279 | 204 | 225 | 236 | 223 | 240 | 185 | 222 |
| 54  | 61  | 59  | 70  | 104 | 89  | 78  | 85  | 84  | 52  |
| 91  | 83  | 105 | 101 | 124 | 95  | 189 | 138 | 173 | 114 |
| 52  | 65  | 73  | 109 | 154 | 151 | 102 | 95  | 95  | 47  |
| 48  | 32  | 34  | 74  | 107 | 97  | 79  | 86  | 62  | 42  |
| 59  | 56  | 61  | 109 | 141 | 115 | 60  | 77  | 82  | 60  |
| 69  | 65  | 78  | 150 | 181 | 157 | 157 | 180 | 164 | 91  |
| 25  | 24  | 36  | 39  | 43  | 47  | 45  | 35  | 32  | 32  |
| 85  | 98  | 113 | 86  | 96  | 76  | 106 | 106 | 96  | 101 |
| 40  | 36  | 41  | 38  | 57  | 40  | 35  | 25  | 31  | 26  |
| 29  | 28  | 38  | 14  | 18  | 20  | 17  | 13  | 17  | 17  |
| 71  | 65  | 51  | 94  | 122 | 111 | 95  | 77  | 104 | 82  |
| 35  | 41  | 37  | 41  | 38  | 39  | 42  | 43  | 42  | 33  |
| 90  | 107 | 97  | 138 | 136 | 118 | 210 | 214 | 226 | 157 |
| 36  | 49  | 55  | 183 | 258 | 233 | 202 | 168 | 179 | 107 |
| 43  | 45  | 38  | 124 | 145 | 128 | 79  | 49  | 64  | 49  |
| 59  | 82  | 76  | 130 | 138 | 123 | 181 | 166 | 210 | 103 |
| 28  | 23  | 25  | 34  | 52  | 37  | 34  | 33  | 40  | 31  |
| 44  | 41  | 50  | 59  | 55  | 39  | 37  | 51  | 63  | 32  |
| 31  | 31  | 41  | 24  | 55  | 50  | 44  | 35  | 43  | 21  |
| 85  | 95  | 100 | 83  | 122 | 86  | 149 | 104 | 131 | 96  |
| 43  | 50  | 57  | 31  | 37  | 53  | 55  | 35  | 49  | 47  |
| 32  | 40  | 38  | 12  | 20  | 21  | 33  | 18  | 25  | 30  |
| 99  | 94  | 108 | 62  | 98  | 84  | 160 | 149 | 178 | 95  |
| 101 | 88  | 109 | 110 | 153 | 109 | 142 | 135 | 132 | 123 |
| 54  | 41  | 72  | 138 | 181 | 144 | 146 | 129 | 144 | 89  |
| 17  | 19  | 16  | 24  | 33  | 31  | 47  | 28  | 42  | 38  |
| 47  | 47  | 49  | 226 | 275 | 251 | 275 | 250 | 275 | 107 |
| 36  | 31  | 27  | 16  | 19  | 15  | 22  | 31  | 25  | 27  |
| 57  | 94  | 84  | 60  | 63  | 72  | 97  | 70  | 94  | 97  |
| 44  | 65  | 51  | 37  | 51  | 37  | 60  | 57  | 65  | 49  |
| 28  | 28  | 25  | 36  | 51  | 45  | 35  | 36  | 48  | 27  |
| 49  | 48  | 71  | 66  | 86  | 69  | 67  | 78  | 67  | 51  |
| 40  | 30  | 45  | 64  | 88  | 61  | 83  | 56  | 73  | 38  |

|     |     |     |     |     |     |     |     |     |     |
|-----|-----|-----|-----|-----|-----|-----|-----|-----|-----|
| 14  | 16  | 16  | 9   | 14  | 19  | 30  | 24  | 17  | 18  |
| 11  | 17  | 23  | 14  | 16  | 15  | 11  | 14  | 17  | 16  |
| 29  | 36  | 31  | 21  | 27  | 15  | 36  | 25  | 28  | 31  |
| 17  | 33  | 27  | 33  | 35  | 46  | 24  | 41  | 35  | 18  |
| 21  | 28  | 34  | 84  | 88  | 77  | 67  | 58  | 73  | 44  |
| 58  | 52  | 64  | 58  | 69  | 58  | 88  | 70  | 76  | 52  |
| 30  | 39  | 43  | 23  | 45  | 33  | 46  | 31  | 32  | 22  |
| 30  | 42  | 47  | 30  | 41  | 41  | 26  | 28  | 32  | 37  |
| 39  | 36  | 37  | 41  | 52  | 54  | 48  | 63  | 50  | 38  |
| 42  | 53  | 48  | 63  | 85  | 80  | 39  | 54  | 59  | 31  |
| 40  | 60  | 49  | 69  | 78  | 68  | 80  | 87  | 90  | 55  |
| 24  | 24  | 26  | 64  | 77  | 66  | 40  | 45  | 43  | 25  |
| 69  | 77  | 93  | 186 | 206 | 211 | 167 | 147 | 131 | 83  |
| 25  | 32  | 32  | 106 | 148 | 116 | 77  | 57  | 82  | 46  |
| 23  | 28  | 36  | 30  | 65  | 53  | 36  | 38  | 50  | 26  |
| 21  | 25  | 26  | 50  | 65  | 40  | 44  | 51  | 43  | 33  |
| 66  | 76  | 66  | 46  | 66  | 74  | 94  | 78  | 75  | 76  |
| 5   | 5   | 8   | 5   | 4   | 4   | 6   | 4   | 1   | 6   |
| 23  | 30  | 32  | 9   | 16  | 11  | 25  | 16  | 20  | 23  |
| 17  | 23  | 13  | 11  | 19  | 17  | 14  | 16  | 28  | 22  |
| 49  | 56  | 50  | 47  | 59  | 44  | 78  | 72  | 65  | 59  |
| 44  | 59  | 61  | 65  | 108 | 72  | 116 | 106 | 122 | 48  |
| 31  | 35  | 48  | 49  | 52  | 66  | 40  | 45  | 49  | 33  |
| 53  | 58  | 64  | 40  | 45  | 35  | 58  | 70  | 71  | 58  |
| 75  | 73  | 62  | 41  | 52  | 42  | 57  | 51  | 48  | 54  |
| 52  | 58  | 59  | 226 | 325 | 270 | 273 | 248 | 264 | 113 |
| 58  | 62  | 61  | 62  | 86  | 75  | 98  | 101 | 87  | 62  |
| 42  | 49  | 54  | 61  | 97  | 63  | 77  | 80  | 85  | 52  |
| 39  | 25  | 16  | 78  | 79  | 74  | 68  | 70  | 66  | 41  |
| 33  | 23  | 29  | 95  | 127 | 113 | 67  | 64  | 88  | 49  |
| 100 | 121 | 118 | 179 | 219 | 161 | 245 | 194 | 235 | 133 |
| 86  | 103 | 133 | 83  | 118 | 120 | 111 | 99  | 90  | 80  |
| 61  | 41  | 46  | 59  | 55  | 77  | 49  | 33  | 50  | 29  |
| 64  | 60  | 77  | 47  | 75  | 55  | 91  | 84  | 82  | 74  |
| 177 | 159 | 177 | 117 | 132 | 143 | 155 | 144 | 189 | 163 |
| 20  | 20  | 20  | 66  | 88  | 74  | 55  | 52  | 53  | 30  |
| 66  | 76  | 85  | 117 | 112 | 121 | 116 | 91  | 101 | 69  |
| 58  | 44  | 60  | 27  | 35  | 27  | 36  | 40  | 50  | 45  |
| 89  | 99  | 76  | 67  | 98  | 80  | 69  | 71  | 77  | 72  |
| 84  | 86  | 74  | 67  | 75  | 68  | 56  | 51  | 52  | 62  |
| 38  | 41  | 29  | 82  | 88  | 89  | 76  | 57  | 65  | 43  |

|     |     |     |     |     |     |     |     |     |     |
|-----|-----|-----|-----|-----|-----|-----|-----|-----|-----|
| 212 | 209 | 269 | 186 | 252 | 229 | 259 | 221 | 260 | 251 |
| 26  | 41  | 29  | 22  | 24  | 32  | 27  | 19  | 22  | 23  |
| 19  | 19  | 15  | 28  | 32  | 32  | 35  | 35  | 37  | 21  |
| 48  | 47  | 51  | 136 | 193 | 143 | 89  | 123 | 119 | 63  |
| 31  | 29  | 38  | 31  | 38  | 37  | 32  | 31  | 26  | 28  |
| 47  | 57  | 67  | 34  | 56  | 40  | 75  | 78  | 86  | 58  |
| 37  | 40  | 48  | 34  | 38  | 47  | 30  | 27  | 31  | 44  |
| 26  | 26  | 33  | 41  | 53  | 53  | 37  | 43  | 35  | 24  |
| 84  | 83  | 105 | 129 | 136 | 152 | 191 | 163 | 180 | 110 |
| 99  | 86  | 100 | 70  | 90  | 73  | 95  | 67  | 89  | 71  |
| 117 | 100 | 111 | 142 | 182 | 149 | 166 | 159 | 171 | 127 |
| 77  | 102 | 114 | 69  | 127 | 111 | 117 | 117 | 127 | 78  |
| 26  | 36  | 35  | 24  | 34  | 18  | 37  | 38  | 44  | 37  |
| 6   | 9   | 5   | 6   | 8   | 9   | 9   | 9   | 13  | 6   |
| 22  | 36  | 37  | 57  | 92  | 54  | 63  | 51  | 71  | 40  |
| 37  | 43  | 42  | 33  | 28  | 30  | 46  | 26  | 37  | 36  |
| 35  | 43  | 28  | 60  | 61  | 65  | 81  | 68  | 67  | 52  |
| 62  | 66  | 78  | 92  | 120 | 107 | 138 | 128 | 140 | 88  |
| 35  | 23  | 29  | 39  | 42  | 35  | 32  | 32  | 27  | 28  |
| 63  | 60  | 49  | 100 | 109 | 83  | 121 | 100 | 113 | 65  |
| 53  | 67  | 48  | 50  | 60  | 53  | 50  | 51  | 56  | 40  |
| 39  | 54  | 63  | 56  | 56  | 53  | 61  | 63  | 76  | 55  |
| 57  | 65  | 74  | 90  | 125 | 113 | 114 | 116 | 120 | 85  |
| 81  | 80  | 98  | 55  | 78  | 68  | 64  | 86  | 94  | 91  |
| 150 | 142 | 158 | 141 | 202 | 176 | 196 | 148 | 181 | 135 |
| 34  | 42  | 37  | 61  | 61  | 53  | 82  | 65  | 63  | 45  |
| 35  | 41  | 28  | 46  | 46  | 57  | 43  | 45  | 43  | 33  |
| 22  | 32  | 22  | 35  | 39  | 46  | 47  | 46  | 50  | 25  |
| 39  | 56  | 46  | 60  | 74  | 69  | 44  | 28  | 38  | 44  |
| 67  | 54  | 68  | 79  | 108 | 81  | 104 | 88  | 103 | 68  |
| 46  | 50  | 43  | 78  | 100 | 96  | 57  | 68  | 82  | 53  |
| 67  | 60  | 57  | 74  | 88  | 72  | 123 | 103 | 92  | 80  |
| 62  | 58  | 70  | 113 | 103 | 96  | 81  | 66  | 106 | 53  |
| 31  | 44  | 33  | 15  | 21  | 21  | 21  | 21  | 29  | 20  |
| 14  | 31  | 28  | 17  | 24  | 22  | 26  | 20  | 13  | 25  |
| 49  | 64  | 59  | 48  | 81  | 70  | 61  | 57  | 58  | 58  |
| 40  | 48  | 49  | 73  | 95  | 87  | 95  | 76  | 113 | 58  |
| 61  | 69  | 57  | 64  | 74  | 54  | 95  | 95  | 89  | 59  |
| 70  | 63  | 77  | 185 | 182 | 148 | 175 | 142 | 162 | 69  |
| 65  | 58  | 82  | 113 | 105 | 91  | 117 | 100 | 113 | 57  |
| 89  | 95  | 81  | 80  | 92  | 75  | 138 | 125 | 138 | 93  |

|     |     |     |     |     |     |     |     |     |     |
|-----|-----|-----|-----|-----|-----|-----|-----|-----|-----|
| 72  | 60  | 68  | 118 | 153 | 133 | 124 | 146 | 153 | 84  |
| 59  | 53  | 63  | 74  | 120 | 103 | 91  | 84  | 84  | 70  |
| 42  | 34  | 41  | 53  | 63  | 73  | 46  | 42  | 50  | 31  |
| 109 | 93  | 123 | 101 | 114 | 127 | 89  | 79  | 94  | 94  |
| 35  | 34  | 32  | 14  | 20  | 24  | 36  | 25  | 26  | 19  |
| 34  | 30  | 40  | 17  | 29  | 28  | 10  | 12  | 23  | 22  |
| 33  | 26  | 47  | 25  | 22  | 25  | 26  | 18  | 30  | 28  |
| 60  | 41  | 65  | 188 | 204 | 189 | 139 | 146 | 161 | 72  |
| 131 | 128 | 150 | 122 | 168 | 179 | 289 | 222 | 275 | 167 |
| 35  | 36  | 29  | 58  | 80  | 42  | 40  | 30  | 48  | 20  |
| 34  | 29  | 27  | 39  | 31  | 35  | 37  | 33  | 41  | 32  |
| 35  | 40  | 46  | 24  | 34  | 33  | 26  | 28  | 28  | 32  |
| 53  | 47  | 54  | 66  | 75  | 67  | 54  | 43  | 68  | 44  |
| 28  | 34  | 35  | 23  | 17  | 19  | 11  | 16  | 18  | 36  |
| 34  | 55  | 53  | 159 | 215 | 191 | 245 | 219 | 259 | 109 |
| 47  | 37  | 59  | 78  | 104 | 83  | 90  | 90  | 106 | 52  |
| 28  | 36  | 36  | 25  | 41  | 39  | 57  | 55  | 58  | 36  |
| 40  | 40  | 52  | 41  | 46  | 45  | 57  | 34  | 46  | 41  |
| 26  | 26  | 38  | 45  | 95  | 53  | 53  | 47  | 44  | 28  |
| 40  | 42  | 38  | 97  | 124 | 86  | 190 | 180 | 190 | 93  |
| 96  | 89  | 83  | 110 | 124 | 114 | 138 | 123 | 154 | 88  |
| 41  | 41  | 59  | 44  | 55  | 43  | 52  | 53  | 46  | 49  |
| 67  | 59  | 74  | 41  | 57  | 44  | 87  | 91  | 93  | 71  |
| 60  | 61  | 71  | 75  | 85  | 85  | 98  | 96  | 90  | 75  |
| 47  | 46  | 52  | 79  | 89  | 63  | 35  | 31  | 33  | 31  |
| 67  | 65  | 64  | 58  | 70  | 65  | 81  | 88  | 91  | 64  |
| 37  | 40  | 54  | 45  | 60  | 67  | 69  | 73  | 78  | 54  |
| 43  | 36  | 46  | 46  | 53  | 51  | 82  | 79  | 74  | 55  |
| 45  | 52  | 55  | 101 | 147 | 128 | 112 | 123 | 128 | 72  |
| 24  | 27  | 42  | 11  | 9   | 4   | 12  | 11  | 15  | 24  |
| 71  | 80  | 87  | 97  | 117 | 117 | 91  | 98  | 113 | 85  |
| 85  | 79  | 90  | 120 | 147 | 132 | 133 | 129 | 148 | 92  |
| 54  | 51  | 42  | 33  | 35  | 55  | 32  | 32  | 43  | 40  |
| 35  | 22  | 27  | 21  | 28  | 30  | 34  | 37  | 30  | 22  |
| 41  | 59  | 46  | 115 | 138 | 129 | 83  | 87  | 82  | 65  |
| 74  | 71  | 87  | 60  | 76  | 88  | 97  | 83  | 88  | 76  |
| 18  | 26  | 23  | 63  | 71  | 69  | 96  | 100 | 102 | 55  |
| 48  | 66  | 76  | 82  | 95  | 86  | 99  | 78  | 107 | 75  |
| 101 | 102 | 85  | 128 | 165 | 141 | 101 | 76  | 79  | 55  |
| 34  | 23  | 38  | 61  | 90  | 63  | 53  | 57  | 65  | 39  |
| 10  | 18  | 24  | 3   | 15  | 11  | 18  | 28  | 13  | 23  |

|     |     |     |     |     |     |     |     |     |     |
|-----|-----|-----|-----|-----|-----|-----|-----|-----|-----|
| 33  | 27  | 30  | 35  | 58  | 43  | 44  | 51  | 57  | 45  |
| 40  | 57  | 42  | 41  | 45  | 42  | 45  | 43  | 39  | 49  |
| 47  | 32  | 51  | 39  | 49  | 45  | 37  | 38  | 45  | 19  |
| 46  | 48  | 49  | 66  | 75  | 72  | 106 | 102 | 103 | 56  |
| 64  | 60  | 61  | 81  | 85  | 79  | 116 | 95  | 106 | 56  |
| 32  | 21  | 42  | 52  | 49  | 57  | 66  | 76  | 80  | 52  |
| 83  | 72  | 74  | 85  | 93  | 86  | 96  | 81  | 101 | 76  |
| 51  | 64  | 89  | 32  | 34  | 45  | 56  | 36  | 53  | 43  |
| 49  | 43  | 48  | 44  | 62  | 49  | 47  | 35  | 49  | 54  |
| 41  | 32  | 43  | 42  | 33  | 36  | 19  | 17  | 24  | 33  |
| 48  | 61  | 72  | 28  | 32  | 32  | 32  | 25  | 43  | 36  |
| 40  | 58  | 55  | 36  | 59  | 53  | 56  | 57  | 67  | 42  |
| 94  | 87  | 109 | 78  | 79  | 77  | 147 | 153 | 166 | 99  |
| 66  | 90  | 87  | 92  | 103 | 106 | 125 | 125 | 131 | 79  |
| 37  | 34  | 56  | 29  | 42  | 53  | 27  | 18  | 31  | 28  |
| 54  | 40  | 53  | 83  | 86  | 113 | 64  | 80  | 57  | 53  |
| 66  | 74  | 88  | 77  | 114 | 93  | 99  | 95  | 94  | 60  |
| 18  | 18  | 20  | 14  | 27  | 20  | 26  | 18  | 27  | 19  |
| 57  | 73  | 72  | 67  | 113 | 86  | 123 | 116 | 134 | 79  |
| 56  | 50  | 55  | 112 | 125 | 98  | 190 | 222 | 196 | 85  |
| 36  | 35  | 51  | 49  | 62  | 52  | 68  | 60  | 76  | 53  |
| 42  | 31  | 42  | 27  | 26  | 30  | 26  | 24  | 15  | 34  |
| 38  | 43  | 49  | 22  | 23  | 33  | 19  | 32  | 24  | 32  |
| 86  | 65  | 103 | 60  | 73  | 57  | 59  | 61  | 71  | 75  |
| 44  | 70  | 75  | 113 | 144 | 120 | 103 | 80  | 94  | 48  |
| 77  | 100 | 120 | 74  | 86  | 63  | 60  | 66  | 65  | 52  |
| 88  | 93  | 104 | 91  | 91  | 81  | 61  | 68  | 68  | 62  |
| 63  | 58  | 59  | 63  | 75  | 62  | 76  | 78  | 85  | 59  |
| 27  | 18  | 25  | 28  | 40  | 29  | 44  | 51  | 52  | 24  |
| 63  | 82  | 54  | 111 | 147 | 112 | 78  | 79  | 99  | 76  |
| 90  | 74  | 97  | 102 | 117 | 114 | 152 | 125 | 124 | 92  |
| 50  | 46  | 37  | 65  | 69  | 67  | 58  | 59  | 63  | 41  |
| 66  | 79  | 71  | 27  | 60  | 42  | 65  | 61  | 70  | 45  |
| 47  | 42  | 54  | 63  | 83  | 77  | 66  | 66  | 59  | 47  |
| 26  | 23  | 38  | 71  | 67  | 50  | 53  | 47  | 69  | 34  |
| 83  | 94  | 76  | 91  | 122 | 106 | 102 | 89  | 117 | 73  |
| 51  | 65  | 77  | 114 | 145 | 141 | 144 | 128 | 124 | 80  |
| 111 | 99  | 114 | 77  | 94  | 83  | 93  | 94  | 92  | 73  |
| 23  | 19  | 25  | 17  | 13  | 13  | 13  | 14  | 17  | 15  |
| 112 | 111 | 122 | 144 | 197 | 151 | 257 | 222 | 260 | 166 |
| 62  | 52  | 51  | 36  | 38  | 43  | 70  | 46  | 45  | 49  |



|     |     |     |     |     |     |     |     |     |     |
|-----|-----|-----|-----|-----|-----|-----|-----|-----|-----|
| 56  | 70  | 74  | 36  | 54  | 59  | 53  | 74  | 71  | 54  |
| 50  | 48  | 39  | 49  | 64  | 58  | 36  | 38  | 36  | 34  |
| 44  | 40  | 46  | 89  | 88  | 93  | 77  | 70  | 78  | 63  |
| 111 | 104 | 119 | 191 | 237 | 213 | 231 | 214 | 220 | 111 |
| 117 | 95  | 138 | 179 | 254 | 204 | 199 | 186 | 190 | 134 |
| 118 | 91  | 100 | 127 | 138 | 122 | 132 | 114 | 126 | 97  |
| 16  | 14  | 16  | 27  | 36  | 31  | 21  | 15  | 18  | 13  |
| 45  | 66  | 45  | 122 | 127 | 124 | 75  | 68  | 77  | 74  |
| 77  | 58  | 83  | 99  | 133 | 134 | 124 | 129 | 144 | 78  |
| 60  | 71  | 81  | 108 | 110 | 96  | 108 | 93  | 101 | 76  |
| 49  | 48  | 63  | 60  | 103 | 84  | 133 | 120 | 139 | 75  |
| 55  | 67  | 82  | 86  | 103 | 88  | 108 | 98  | 95  | 56  |
| 49  | 48  | 58  | 77  | 91  | 85  | 68  | 73  | 81  | 76  |
| 61  | 59  | 76  | 68  | 98  | 83  | 118 | 108 | 122 | 79  |
| 24  | 23  | 15  | 24  | 32  | 24  | 35  | 25  | 24  | 29  |
| 34  | 30  | 44  | 40  | 48  | 66  | 43  | 43  | 43  | 43  |
| 47  | 49  | 62  | 128 | 145 | 141 | 118 | 123 | 120 | 68  |
| 87  | 70  | 74  | 38  | 55  | 44  | 64  | 54  | 71  | 61  |
| 18  | 25  | 21  | 29  | 38  | 37  | 17  | 21  | 14  | 22  |
| 33  | 33  | 32  | 26  | 34  | 28  | 27  | 32  | 32  | 19  |
| 48  | 77  | 63  | 220 | 253 | 233 | 237 | 214 | 308 | 123 |
| 41  | 47  | 53  | 46  | 68  | 48  | 70  | 65  | 71  | 48  |
| 49  | 41  | 49  | 56  | 68  | 62  | 72  | 54  | 67  | 48  |
| 85  | 87  | 92  | 81  | 103 | 105 | 147 | 124 | 153 | 101 |
| 40  | 38  | 47  | 71  | 78  | 77  | 54  | 57  | 59  | 37  |
| 69  | 74  | 98  | 139 | 122 | 120 | 127 | 152 | 160 | 92  |
| 52  | 66  | 89  | 106 | 153 | 111 | 201 | 185 | 153 | 121 |
| 3   | 15  | 6   | 14  | 18  | 24  | 22  | 22  | 19  | 17  |
| 115 | 108 | 125 | 112 | 140 | 137 | 180 | 150 | 191 | 89  |
| 54  | 42  | 46  | 112 | 123 | 124 | 131 | 137 | 135 | 78  |
| 58  | 77  | 61  | 129 | 171 | 126 | 172 | 136 | 117 | 74  |
| 14  | 7   | 14  | 20  | 24  | 22  | 17  | 18  | 24  | 11  |
| 42  | 65  | 67  | 79  | 78  | 73  | 96  | 83  | 107 | 67  |
| 39  | 51  | 60  | 42  | 34  | 48  | 29  | 35  | 44  | 51  |
| 84  | 78  | 93  | 91  | 99  | 82  | 116 | 93  | 108 | 80  |
| 23  | 35  | 34  | 38  | 43  | 40  | 51  | 63  | 71  | 32  |
| 40  | 34  | 51  | 60  | 70  | 69  | 66  | 56  | 61  | 33  |
| 163 | 143 | 158 | 150 | 229 | 201 | 313 | 278 | 299 | 188 |
| 29  | 33  | 40  | 21  | 23  | 36  | 25  | 42  | 25  | 32  |
| 17  | 25  | 26  | 37  | 36  | 28  | 38  | 20  | 28  | 23  |
| 28  | 38  | 31  | 128 | 166 | 154 | 166 | 169 | 164 | 74  |

|     |     |     |     |     |     |     |     |     |     |
|-----|-----|-----|-----|-----|-----|-----|-----|-----|-----|
| 25  | 29  | 25  | 60  | 60  | 46  | 71  | 55  | 59  | 32  |
| 20  | 23  | 17  | 11  | 5   | 6   | 16  | 5   | 9   | 19  |
| 44  | 46  | 43  | 80  | 95  | 84  | 68  | 52  | 73  | 44  |
| 57  | 44  | 47  | 79  | 82  | 81  | 55  | 53  | 48  | 42  |
| 39  | 52  | 39  | 21  | 37  | 31  | 30  | 40  | 25  | 34  |
| 40  | 57  | 44  | 58  | 72  | 56  | 86  | 66  | 62  | 49  |
| 25  | 36  | 40  | 66  | 87  | 75  | 66  | 56  | 65  | 32  |
| 120 | 90  | 120 | 103 | 130 | 94  | 200 | 173 | 213 | 116 |
| 47  | 47  | 45  | 53  | 81  | 59  | 70  | 90  | 76  | 55  |
| 32  | 32  | 33  | 22  | 36  | 20  | 24  | 24  | 36  | 29  |
| 51  | 62  | 54  | 46  | 66  | 69  | 39  | 42  | 40  | 46  |
| 7   | 11  | 19  | 9   | 13  | 9   | 18  | 18  | 18  | 13  |
| 96  | 94  | 96  | 97  | 118 | 100 | 113 | 104 | 110 | 67  |
| 62  | 70  | 104 | 127 | 178 | 158 | 152 | 124 | 153 | 74  |
| 42  | 48  | 61  | 64  | 80  | 63  | 62  | 86  | 58  | 51  |
| 73  | 69  | 85  | 68  | 86  | 81  | 112 | 128 | 141 | 69  |
| 57  | 57  | 69  | 27  | 32  | 21  | 55  | 36  | 43  | 37  |
| 73  | 60  | 68  | 64  | 89  | 81  | 89  | 106 | 84  | 66  |
| 34  | 32  | 46  | 49  | 52  | 39  | 37  | 30  | 41  | 38  |
| 64  | 64  | 87  | 87  | 99  | 90  | 129 | 126 | 139 | 70  |
| 39  | 64  | 73  | 52  | 45  | 49  | 37  | 28  | 32  | 37  |
| 56  | 60  | 75  | 56  | 89  | 68  | 73  | 96  | 99  | 71  |
| 34  | 21  | 34  | 142 | 176 | 159 | 258 | 257 | 249 | 95  |
| 86  | 96  | 118 | 125 | 155 | 101 | 217 | 177 | 175 | 129 |
| 18  | 11  | 19  | 9   | 11  | 12  | 10  | 20  | 12  | 19  |
| 39  | 53  | 49  | 52  | 66  | 44  | 87  | 84  | 77  | 68  |
| 69  | 42  | 61  | 53  | 52  | 52  | 40  | 48  | 40  | 49  |
| 46  | 46  | 35  | 131 | 141 | 111 | 117 | 92  | 122 | 82  |
| 49  | 57  | 71  | 39  | 60  | 48  | 66  | 49  | 70  | 66  |
| 41  | 38  | 43  | 38  | 63  | 38  | 43  | 42  | 34  | 25  |
| 21  | 39  | 26  | 38  | 57  | 57  | 71  | 64  | 60  | 27  |
| 40  | 41  | 50  | 20  | 28  | 16  | 26  | 35  | 33  | 35  |
| 45  | 39  | 52  | 34  | 53  | 41  | 57  | 62  | 68  | 49  |
| 55  | 44  | 51  | 92  | 95  | 76  | 102 | 107 | 110 | 53  |
| 57  | 54  | 54  | 87  | 120 | 104 | 96  | 90  | 120 | 70  |
| 49  | 48  | 51  | 236 | 254 | 255 | 335 | 331 | 338 | 158 |
| 77  | 85  | 100 | 128 | 134 | 120 | 141 | 131 | 112 | 67  |
| 88  | 72  | 106 | 101 | 96  | 100 | 119 | 95  | 118 | 84  |
| 129 | 105 | 110 | 74  | 96  | 92  | 71  | 65  | 78  | 79  |
| 35  | 22  | 29  | 17  | 26  | 33  | 35  | 24  | 31  | 31  |
| 50  | 45  | 38  | 32  | 44  | 33  | 43  | 39  | 45  | 40  |

|     |     |     |     |     |     |     |     |     |     |
|-----|-----|-----|-----|-----|-----|-----|-----|-----|-----|
| 64  | 57  | 77  | 76  | 82  | 87  | 104 | 95  | 90  | 87  |
| 30  | 30  | 23  | 24  | 28  | 26  | 31  | 36  | 39  | 16  |
| 28  | 51  | 44  | 47  | 48  | 52  | 49  | 48  | 56  | 39  |
| 18  | 25  | 22  | 12  | 12  | 14  | 9   | 4   | 16  | 18  |
| 61  | 63  | 69  | 59  | 85  | 71  | 108 | 93  | 115 | 68  |
| 62  | 51  | 57  | 73  | 88  | 79  | 78  | 55  | 76  | 46  |
| 43  | 59  | 63  | 84  | 129 | 94  | 95  | 73  | 79  | 56  |
| 26  | 27  | 31  | 17  | 22  | 19  | 15  | 23  | 21  | 29  |
| 55  | 50  | 50  | 23  | 22  | 15  | 23  | 26  | 25  | 33  |
| 52  | 50  | 68  | 18  | 29  | 22  | 43  | 46  | 51  | 45  |
| 52  | 57  | 61  | 38  | 47  | 37  | 49  | 35  | 41  | 58  |
| 62  | 50  | 74  | 49  | 60  | 51  | 94  | 85  | 93  | 82  |
| 156 | 138 | 149 | 131 | 150 | 149 | 206 | 202 | 220 | 151 |
| 34  | 25  | 31  | 35  | 44  | 35  | 39  | 45  | 53  | 34  |
| 74  | 59  | 69  | 49  | 73  | 55  | 71  | 63  | 51  | 68  |
| 51  | 48  | 41  | 52  | 54  | 53  | 43  | 34  | 43  | 34  |
| 79  | 76  | 89  | 59  | 49  | 53  | 81  | 77  | 91  | 74  |
| 15  | 9   | 19  | 47  | 52  | 48  | 34  | 31  | 36  | 14  |
| 77  | 94  | 116 | 146 | 208 | 168 | 263 | 238 | 245 | 152 |
| 33  | 49  | 35  | 49  | 63  | 55  | 64  | 73  | 75  | 44  |
| 45  | 50  | 58  | 117 | 143 | 125 | 174 | 182 | 157 | 75  |
| 39  | 55  | 36  | 72  | 72  | 68  | 91  | 99  | 76  | 62  |
| 124 | 124 | 153 | 153 | 203 | 186 | 215 | 256 | 257 | 157 |
| 50  | 46  | 54  | 96  | 127 | 95  | 144 | 131 | 143 | 68  |
| 13  | 20  | 26  | 38  | 43  | 50  | 55  | 57  | 59  | 31  |
| 34  | 40  | 42  | 59  | 91  | 68  | 45  | 65  | 52  | 41  |
| 4   | 7   | 12  | 22  | 10  | 17  | 15  | 17  | 22  | 7   |
| 41  | 42  | 47  | 50  | 51  | 54  | 57  | 47  | 42  | 48  |
| 43  | 43  | 44  | 32  | 25  | 43  | 45  | 40  | 50  | 29  |
| 33  | 48  | 52  | 70  | 86  | 75  | 54  | 66  | 64  | 50  |
| 68  | 67  | 67  | 57  | 82  | 83  | 116 | 122 | 127 | 67  |
| 24  | 50  | 47  | 22  | 31  | 18  | 39  | 24  | 24  | 37  |
| 33  | 41  | 39  | 46  | 56  | 51  | 48  | 31  | 32  | 36  |
| 16  | 12  | 27  | 28  | 31  | 20  | 23  | 19  | 28  | 20  |
| 96  | 89  | 94  | 108 | 134 | 126 | 117 | 101 | 103 | 103 |
| 59  | 57  | 54  | 53  | 73  | 54  | 85  | 52  | 68  | 51  |
| 11  | 13  | 14  | 28  | 24  | 23  | 31  | 38  | 27  | 13  |
| 75  | 66  | 80  | 110 | 146 | 110 | 99  | 82  | 136 | 73  |
| 36  | 41  | 35  | 64  | 72  | 57  | 58  | 68  | 64  | 32  |
| 19  | 18  | 20  | 45  | 65  | 36  | 26  | 14  | 18  | 20  |
| 74  | 59  | 86  | 105 | 137 | 75  | 96  | 94  | 121 | 72  |

|     |     |     |     |     |     |     |     |     |     |
|-----|-----|-----|-----|-----|-----|-----|-----|-----|-----|
| 31  | 36  | 31  | 49  | 93  | 65  | 117 | 81  | 79  | 56  |
| 56  | 65  | 59  | 91  | 102 | 69  | 83  | 77  | 86  | 73  |
| 57  | 55  | 52  | 259 | 312 | 284 | 364 | 300 | 363 | 115 |
| 43  | 40  | 59  | 46  | 49  | 39  | 55  | 43  | 64  | 49  |
| 73  | 60  | 73  | 78  | 103 | 128 | 91  | 86  | 104 | 68  |
| 112 | 100 | 100 | 59  | 60  | 65  | 61  | 68  | 80  | 46  |
| 57  | 65  | 60  | 310 | 388 | 305 | 502 | 463 | 520 | 204 |
| 61  | 66  | 82  | 58  | 76  | 84  | 69  | 66  | 46  | 60  |
| 9   | 16  | 11  | 26  | 20  | 25  | 9   | 17  | 14  | 18  |
| 36  | 29  | 42  | 65  | 89  | 59  | 51  | 37  | 49  | 32  |
| 33  | 31  | 44  | 48  | 81  | 76  | 70  | 61  | 73  | 40  |
| 20  | 19  | 16  | 37  | 53  | 55  | 61  | 34  | 52  | 27  |
| 16  | 9   | 21  | 12  | 13  | 10  | 6   | 17  | 15  | 8   |
| 59  | 51  | 68  | 49  | 66  | 59  | 65  | 57  | 69  | 38  |
| 29  | 29  | 28  | 39  | 57  | 43  | 57  | 67  | 73  | 21  |
| 29  | 17  | 28  | 33  | 41  | 31  | 29  | 35  | 39  | 32  |
| 42  | 41  | 36  | 178 | 233 | 200 | 82  | 95  | 83  | 63  |
| 45  | 40  | 37  | 49  | 46  | 53  | 70  | 44  | 63  | 38  |
| 38  | 40  | 48  | 29  | 29  | 28  | 33  | 25  | 33  | 26  |
| 110 | 109 | 92  | 125 | 191 | 187 | 230 | 239 | 255 | 144 |
| 43  | 46  | 46  | 14  | 7   | 10  | 16  | 14  | 16  | 27  |
| 22  | 21  | 21  | 103 | 106 | 65  | 53  | 39  | 60  | 39  |
| 98  | 100 | 119 | 197 | 266 | 222 | 253 | 237 | 244 | 125 |
| 108 | 97  | 105 | 286 | 414 | 330 | 700 | 548 | 572 | 309 |
| 22  | 27  | 33  | 32  | 58  | 51  | 57  | 50  | 62  | 35  |
| 53  | 52  | 54  | 56  | 75  | 68  | 45  | 51  | 61  | 37  |
| 64  | 52  | 64  | 98  | 118 | 109 | 97  | 98  | 129 | 73  |
| 73  | 68  | 80  | 54  | 65  | 60  | 56  | 74  | 62  | 57  |
| 39  | 29  | 38  | 113 | 124 | 117 | 79  | 75  | 76  | 34  |
| 66  | 39  | 36  | 39  | 54  | 49  | 56  | 40  | 48  | 37  |
| 36  | 35  | 33  | 70  | 91  | 81  | 61  | 72  | 54  | 31  |
| 97  | 106 | 114 | 50  | 76  | 57  | 89  | 86  | 113 | 95  |
| 33  | 25  | 36  | 39  | 54  | 54  | 47  | 48  | 29  | 44  |
| 140 | 139 | 155 | 99  | 132 | 116 | 138 | 138 | 160 | 157 |
| 60  | 53  | 43  | 70  | 79  | 63  | 86  | 71  | 95  | 50  |
| 19  | 18  | 15  | 15  | 19  | 12  | 15  | 13  | 21  | 18  |
| 65  | 53  | 76  | 84  | 110 | 88  | 80  | 74  | 116 | 60  |
| 82  | 75  | 106 | 88  | 98  | 77  | 122 | 94  | 101 | 92  |
| 99  | 95  | 107 | 180 | 177 | 165 | 234 | 229 | 228 | 171 |
| 47  | 43  | 46  | 63  | 96  | 86  | 74  | 66  | 84  | 64  |
| 60  | 61  | 60  | 75  | 70  | 69  | 69  | 69  | 73  | 75  |

|     |     |     |     |     |     |     |     |     |     |
|-----|-----|-----|-----|-----|-----|-----|-----|-----|-----|
| 32  | 43  | 42  | 57  | 59  | 52  | 34  | 34  | 38  | 34  |
| 70  | 55  | 62  | 56  | 75  | 74  | 82  | 77  | 93  | 86  |
| 51  | 40  | 51  | 74  | 93  | 71  | 85  | 57  | 86  | 59  |
| 45  | 28  | 35  | 47  | 30  | 50  | 43  | 41  | 36  | 35  |
| 85  | 90  | 103 | 75  | 93  | 103 | 108 | 85  | 85  | 74  |
| 25  | 17  | 30  | 29  | 34  | 29  | 31  | 33  | 33  | 26  |
| 42  | 46  | 51  | 50  | 67  | 73  | 57  | 85  | 92  | 53  |
| 11  | 13  | 13  | 31  | 49  | 37  | 21  | 20  | 17  | 15  |
| 43  | 45  | 48  | 25  | 29  | 21  | 30  | 36  | 39  | 21  |
| 70  | 78  | 91  | 107 | 121 | 124 | 125 | 93  | 124 | 85  |
| 53  | 56  | 58  | 124 | 153 | 123 | 111 | 117 | 118 | 65  |
| 37  | 43  | 39  | 69  | 83  | 69  | 93  | 75  | 116 | 51  |
| 51  | 55  | 84  | 45  | 44  | 49  | 81  | 62  | 78  | 58  |
| 88  | 75  | 105 | 150 | 183 | 124 | 192 | 175 | 192 | 108 |
| 43  | 56  | 64  | 94  | 136 | 100 | 115 | 106 | 94  | 47  |
| 22  | 24  | 33  | 27  | 35  | 25  | 53  | 47  | 53  | 24  |
| 24  | 24  | 39  | 45  | 57  | 50  | 26  | 21  | 32  | 26  |
| 71  | 65  | 67  | 40  | 53  | 48  | 117 | 97  | 117 | 69  |
| 10  | 18  | 19  | 24  | 22  | 28  | 20  | 17  | 28  | 16  |
| 55  | 48  | 67  | 63  | 73  | 62  | 75  | 48  | 58  | 46  |
| 50  | 46  | 68  | 43  | 81  | 60  | 88  | 67  | 83  | 48  |
| 41  | 49  | 44  | 57  | 65  | 64  | 87  | 69  | 89  | 52  |
| 56  | 59  | 64  | 110 | 158 | 166 | 117 | 144 | 134 | 84  |
| 122 | 115 | 148 | 118 | 140 | 149 | 256 | 221 | 251 | 172 |
| 31  | 26  | 40  | 45  | 54  | 58  | 63  | 45  | 53  | 46  |
| 31  | 27  | 36  | 57  | 58  | 63  | 50  | 35  | 47  | 40  |
| 17  | 14  | 31  | 11  | 15  | 19  | 30  | 21  | 11  | 25  |
| 38  | 38  | 33  | 39  | 48  | 37  | 44  | 34  | 65  | 44  |
| 26  | 28  | 32  | 41  | 62  | 33  | 27  | 33  | 40  | 19  |
| 47  | 54  | 46  | 94  | 88  | 88  | 124 | 133 | 147 | 83  |
| 89  | 77  | 99  | 115 | 128 | 123 | 156 | 121 | 169 | 117 |
| 29  | 24  | 21  | 45  | 41  | 50  | 38  | 55  | 46  | 29  |
| 52  | 47  | 58  | 16  | 7   | 12  | 19  | 29  | 14  | 35  |
| 32  | 39  | 38  | 65  | 68  | 47  | 40  | 44  | 53  | 39  |
| 22  | 24  | 21  | 16  | 22  | 24  | 17  | 26  | 28  | 19  |
| 82  | 86  | 97  | 208 | 304 | 236 | 273 | 270 | 256 | 133 |
| 54  | 63  | 70  | 68  | 81  | 70  | 89  | 93  | 85  | 65  |
| 202 | 229 | 194 | 138 | 179 | 155 | 140 | 152 | 167 | 179 |
| 41  | 57  | 48  | 59  | 100 | 65  | 68  | 78  | 82  | 46  |
| 34  | 40  | 41  | 30  | 43  | 30  | 38  | 49  | 37  | 30  |
| 14  | 20  | 21  | 23  | 25  | 31  | 17  | 46  | 40  | 19  |

|     |     |     |     |     |     |     |     |     |     |
|-----|-----|-----|-----|-----|-----|-----|-----|-----|-----|
| 131 | 121 | 106 | 133 | 159 | 128 | 183 | 182 | 218 | 160 |
| 61  | 57  | 71  | 141 | 192 | 133 | 110 | 105 | 100 | 72  |
| 48  | 67  | 66  | 56  | 92  | 76  | 95  | 67  | 82  | 67  |
| 60  | 61  | 52  | 47  | 56  | 35  | 45  | 41  | 45  | 44  |
| 37  | 44  | 46  | 34  | 46  | 39  | 59  | 55  | 80  | 56  |
| 52  | 69  | 79  | 91  | 118 | 100 | 114 | 112 | 124 | 72  |
| 55  | 50  | 46  | 91  | 104 | 68  | 70  | 52  | 80  | 40  |
| 55  | 45  | 52  | 35  | 71  | 61  | 72  | 58  | 68  | 48  |
| 38  | 43  | 45  | 109 | 132 | 117 | 146 | 126 | 149 | 63  |
| 30  | 34  | 33  | 32  | 34  | 35  | 54  | 57  | 45  | 30  |
| 72  | 63  | 68  | 54  | 71  | 55  | 75  | 62  | 74  | 65  |
| 46  | 64  | 50  | 108 | 150 | 154 | 194 | 183 | 205 | 80  |
| 34  | 42  | 42  | 39  | 43  | 52  | 46  | 28  | 44  | 23  |
| 29  | 38  | 34  | 16  | 40  | 25  | 42  | 51  | 43  | 30  |
| 58  | 58  | 70  | 58  | 73  | 66  | 58  | 56  | 76  | 61  |
| 31  | 31  | 33  | 63  | 69  | 56  | 43  | 53  | 45  | 26  |
| 81  | 91  | 91  | 142 | 188 | 162 | 235 | 222 | 231 | 138 |
| 37  | 54  | 55  | 50  | 44  | 47  | 103 | 97  | 97  | 65  |
| 25  | 18  | 26  | 20  | 29  | 22  | 38  | 26  | 26  | 19  |
| 38  | 40  | 41  | 32  | 47  | 46  | 42  | 34  | 45  | 25  |
| 51  | 46  | 61  | 57  | 87  | 69  | 91  | 115 | 114 | 64  |
| 42  | 33  | 47  | 114 | 165 | 150 | 169 | 150 | 161 | 77  |
| 69  | 73  | 85  | 113 | 115 | 116 | 144 | 123 | 135 | 71  |
| 31  | 29  | 27  | 30  | 29  | 23  | 33  | 24  | 23  | 18  |
| 64  | 66  | 73  | 80  | 74  | 80  | 90  | 86  | 79  | 60  |
| 29  | 37  | 45  | 63  | 57  | 44  | 57  | 58  | 70  | 30  |
| 47  | 49  | 59  | 167 | 229 | 206 | 165 | 162 | 163 | 97  |
| 50  | 35  | 34  | 33  | 39  | 41  | 42  | 34  | 38  | 31  |
| 36  | 33  | 37  | 63  | 73  | 57  | 54  | 52  | 70  | 32  |
| 34  | 39  | 44  | 15  | 31  | 20  | 20  | 15  | 21  | 33  |
| 154 | 156 | 183 | 231 | 284 | 275 | 267 | 287 | 292 | 199 |
| 33  | 18  | 20  | 13  | 21  | 18  | 16  | 16  | 37  | 29  |
| 43  | 35  | 42  | 30  | 38  | 36  | 43  | 42  | 49  | 37  |
| 17  | 24  | 32  | 37  | 53  | 48  | 41  | 21  | 28  | 32  |
| 11  | 14  | 18  | 13  | 18  | 10  | 10  | 6   | 13  | 13  |
| 18  | 14  | 31  | 15  | 28  | 30  | 24  | 18  | 27  | 27  |
| 11  | 10  | 17  | 30  | 38  | 46  | 18  | 34  | 29  | 12  |
| 195 | 162 | 194 | 166 | 212 | 184 | 288 | 247 | 291 | 199 |
| 71  | 61  | 76  | 129 | 154 | 129 | 182 | 150 | 156 | 119 |
| 47  | 34  | 51  | 80  | 93  | 81  | 88  | 75  | 94  | 52  |
| 34  | 32  | 30  | 24  | 28  | 29  | 35  | 21  | 20  | 28  |

|     |     |     |     |     |     |     |     |     |     |
|-----|-----|-----|-----|-----|-----|-----|-----|-----|-----|
| 69  | 65  | 70  | 152 | 215 | 158 | 155 | 135 | 158 | 80  |
| 35  | 48  | 39  | 45  | 50  | 53  | 48  | 41  | 50  | 37  |
| 61  | 63  | 56  | 131 | 154 | 160 | 83  | 75  | 95  | 62  |
| 19  | 29  | 35  | 58  | 71  | 59  | 71  | 49  | 63  | 28  |
| 38  | 59  | 55  | 106 | 126 | 137 | 125 | 149 | 139 | 66  |
| 64  | 76  | 68  | 69  | 96  | 80  | 78  | 62  | 65  | 44  |
| 43  | 49  | 51  | 91  | 112 | 93  | 88  | 85  | 94  | 52  |
| 37  | 38  | 54  | 65  | 78  | 72  | 99  | 84  | 95  | 54  |
| 25  | 23  | 48  | 11  | 16  | 15  | 22  | 16  | 18  | 23  |
| 144 | 140 | 163 | 92  | 152 | 137 | 101 | 112 | 132 | 110 |
| 66  | 58  | 69  | 140 | 213 | 187 | 156 | 153 | 175 | 121 |
| 39  | 39  | 47  | 27  | 39  | 25  | 21  | 26  | 23  | 49  |
| 21  | 17  | 18  | 11  | 9   | 17  | 15  | 14  | 19  | 24  |
| 34  | 33  | 40  | 47  | 74  | 89  | 67  | 68  | 86  | 43  |
| 157 | 175 | 216 | 133 | 169 | 132 | 199 | 188 | 191 | 160 |
| 47  | 57  | 55  | 53  | 81  | 77  | 76  | 76  | 87  | 39  |
| 62  | 51  | 49  | 118 | 145 | 132 | 151 | 114 | 189 | 80  |
| 45  | 54  | 52  | 47  | 48  | 50  | 58  | 46  | 46  | 32  |
| 31  | 49  | 48  | 62  | 86  | 90  | 76  | 82  | 73  | 58  |
| 62  | 69  | 66  | 97  | 125 | 97  | 140 | 101 | 99  | 56  |
| 88  | 71  | 86  | 58  | 70  | 63  | 69  | 69  | 73  | 72  |
| 58  | 57  | 76  | 59  | 64  | 62  | 73  | 77  | 69  | 59  |
| 4   | 12  | 4   | 20  | 16  | 15  | 3   | 7   | 7   | 6   |
| 48  | 42  | 43  | 40  | 49  | 47  | 61  | 40  | 45  | 53  |
| 50  | 64  | 52  | 37  | 58  | 59  | 27  | 30  | 39  | 26  |
| 56  | 43  | 50  | 140 | 162 | 160 | 147 | 148 | 151 | 81  |
| 57  | 65  | 50  | 41  | 61  | 54  | 56  | 79  | 76  | 62  |
| 48  | 55  | 72  | 140 | 151 | 123 | 204 | 193 | 208 | 103 |
| 8   | 6   | 14  | 8   | 9   | 10  | 8   | 11  | 9   | 13  |
| 26  | 18  | 22  | 39  | 38  | 37  | 33  | 32  | 38  | 22  |
| 38  | 44  | 55  | 35  | 58  | 40  | 52  | 37  | 43  | 39  |
| 21  | 19  | 30  | 20  | 29  | 22  | 17  | 15  | 11  | 10  |
| 28  | 20  | 31  | 28  | 31  | 28  | 15  | 22  | 23  | 30  |
| 9   | 6   | 9   | 5   | 9   | 8   | 8   | 9   | 9   | 14  |
| 41  | 36  | 58  | 24  | 31  | 21  | 33  | 29  | 34  | 41  |
| 85  | 55  | 55  | 62  | 81  | 78  | 74  | 66  | 71  | 61  |
| 34  | 39  | 54  | 24  | 27  | 19  | 28  | 29  | 37  | 43  |
| 16  | 22  | 22  | 10  | 15  | 9   | 13  | 11  | 12  | 21  |
| 10  | 17  | 19  | 20  | 13  | 11  | 8   | 11  | 17  | 9   |
| 31  | 26  | 33  | 61  | 81  | 81  | 81  | 48  | 64  | 44  |
| 31  | 40  | 48  | 58  | 70  | 55  | 79  | 47  | 67  | 49  |

|     |     |     |     |     |     |     |     |     |     |
|-----|-----|-----|-----|-----|-----|-----|-----|-----|-----|
| 45  | 42  | 40  | 179 | 237 | 218 | 215 | 181 | 196 | 95  |
| 74  | 87  | 69  | 153 | 151 | 154 | 164 | 163 | 164 | 90  |
| 41  | 54  | 54  | 69  | 85  | 77  | 86  | 86  | 72  | 42  |
| 21  | 20  | 17  | 19  | 31  | 21  | 20  | 26  | 38  | 34  |
| 37  | 50  | 45  | 32  | 41  | 42  | 49  | 61  | 55  | 41  |
| 84  | 99  | 99  | 45  | 79  | 55  | 91  | 87  | 104 | 75  |
| 76  | 67  | 87  | 115 | 129 | 122 | 129 | 137 | 153 | 79  |
| 68  | 67  | 72  | 90  | 108 | 88  | 99  | 100 | 101 | 73  |
| 21  | 46  | 34  | 48  | 41  | 74  | 69  | 58  | 63  | 40  |
| 26  | 19  | 33  | 35  | 41  | 35  | 34  | 43  | 48  | 17  |
| 36  | 43  | 52  | 64  | 98  | 73  | 76  | 65  | 84  | 36  |
| 52  | 76  | 63  | 36  | 47  | 33  | 42  | 39  | 45  | 44  |
| 90  | 104 | 102 | 61  | 54  | 50  | 80  | 84  | 86  | 63  |
| 122 | 133 | 157 | 87  | 117 | 110 | 165 | 123 | 137 | 110 |
| 49  | 48  | 62  | 51  | 69  | 37  | 58  | 73  | 85  | 48  |
| 8   | 8   | 19  | 17  | 25  | 29  | 30  | 16  | 22  | 18  |
| 114 | 102 | 103 | 212 | 265 | 232 | 199 | 200 | 227 | 144 |
| 34  | 44  | 41  | 25  | 33  | 28  | 49  | 48  | 45  | 32  |
| 71  | 68  | 78  | 107 | 126 | 121 | 145 | 108 | 135 | 76  |
| 117 | 102 | 117 | 96  | 135 | 120 | 78  | 88  | 88  | 60  |
| 16  | 9   | 11  | 17  | 24  | 17  | 45  | 42  | 32  | 24  |
| 65  | 65  | 66  | 107 | 136 | 140 | 130 | 104 | 100 | 54  |
| 65  | 64  | 100 | 5   | 7   | 11  | 37  | 21  | 30  | 45  |
| 16  | 18  | 19  | 21  | 24  | 20  | 13  | 13  | 8   | 19  |
| 48  | 50  | 48  | 24  | 40  | 40  | 57  | 61  | 67  | 47  |
| 32  | 33  | 30  | 29  | 46  | 27  | 34  | 27  | 41  | 30  |
| 52  | 55  | 52  | 48  | 66  | 60  | 53  | 47  | 70  | 52  |
| 34  | 42  | 33  | 66  | 93  | 101 | 61  | 39  | 70  | 41  |
| 38  | 46  | 45  | 55  | 77  | 50  | 51  | 59  | 53  | 45  |
| 49  | 77  | 72  | 62  | 88  | 81  | 79  | 76  | 81  | 58  |
| 40  | 52  | 45  | 36  | 56  | 56  | 59  | 52  | 53  | 57  |
| 37  | 43  | 45  | 42  | 68  | 47  | 56  | 45  | 51  | 26  |
| 84  | 92  | 105 | 110 | 137 | 127 | 132 | 127 | 130 | 75  |
| 118 | 116 | 125 | 77  | 78  | 79  | 113 | 106 | 119 | 110 |
| 37  | 54  | 80  | 71  | 88  | 85  | 109 | 87  | 119 | 63  |
| 91  | 77  | 104 | 88  | 124 | 95  | 115 | 109 | 131 | 91  |
| 50  | 37  | 45  | 22  | 31  | 41  | 35  | 34  | 33  | 44  |
| 71  | 65  | 71  | 75  | 92  | 92  | 104 | 118 | 114 | 82  |
| 42  | 49  | 44  | 70  | 78  | 76  | 80  | 63  | 77  | 61  |
| 145 | 165 | 187 | 201 | 253 | 232 | 288 | 276 | 295 | 191 |
| 44  | 38  | 61  | 43  | 49  | 53  | 66  | 51  | 62  | 39  |



|     |     |     |     |     |     |     |     |     |     |
|-----|-----|-----|-----|-----|-----|-----|-----|-----|-----|
| 86  | 101 | 90  | 367 | 547 | 416 | 501 | 481 | 517 | 241 |
| 50  | 67  | 84  | 72  | 87  | 77  | 83  | 63  | 68  | 59  |
| 49  | 44  | 51  | 76  | 105 | 97  | 91  | 88  | 91  | 52  |
| 50  | 56  | 49  | 59  | 73  | 74  | 82  | 77  | 95  | 44  |
| 54  | 46  | 60  | 41  | 52  | 29  | 63  | 67  | 82  | 66  |
| 65  | 48  | 70  | 61  | 90  | 70  | 82  | 87  | 82  | 55  |
| 41  | 40  | 50  | 61  | 85  | 68  | 94  | 75  | 76  | 56  |
| 50  | 43  | 43  | 40  | 46  | 34  | 38  | 40  | 38  | 30  |
| 42  | 43  | 43  | 28  | 38  | 41  | 44  | 49  | 51  | 34  |
| 60  | 57  | 59  | 91  | 92  | 88  | 130 | 113 | 112 | 87  |
| 64  | 50  | 84  | 56  | 60  | 51  | 59  | 56  | 52  | 49  |
| 115 | 133 | 117 | 191 | 202 | 168 | 300 | 283 | 318 | 154 |
| 29  | 37  | 46  | 140 | 196 | 125 | 86  | 69  | 75  | 45  |
| 30  | 27  | 22  | 32  | 37  | 27  | 49  | 58  | 56  | 31  |
| 64  | 70  | 74  | 67  | 89  | 65  | 95  | 89  | 111 | 70  |
| 42  | 51  | 49  | 54  | 65  | 76  | 95  | 69  | 83  | 38  |
| 28  | 38  | 33  | 21  | 24  | 22  | 30  | 29  | 30  | 20  |
| 43  | 39  | 57  | 31  | 39  | 39  | 41  | 34  | 39  | 40  |
| 101 | 94  | 83  | 130 | 178 | 154 | 236 | 230 | 201 | 128 |
| 117 | 127 | 104 | 243 | 254 | 216 | 363 | 348 | 348 | 227 |
| 48  | 48  | 46  | 97  | 131 | 117 | 103 | 86  | 92  | 61  |
| 74  | 64  | 86  | 63  | 88  | 84  | 89  | 100 | 90  | 63  |
| 42  | 46  | 65  | 30  | 38  | 35  | 47  | 49  | 52  | 51  |
| 12  | 20  | 18  | 19  | 12  | 7   | 35  | 13  | 20  | 11  |
| 38  | 33  | 52  | 111 | 118 | 103 | 136 | 103 | 119 | 65  |
| 34  | 33  | 20  | 55  | 73  | 76  | 44  | 34  | 43  | 37  |
| 36  | 32  | 46  | 85  | 126 | 75  | 73  | 60  | 72  | 39  |
| 95  | 89  | 108 | 118 | 140 | 104 | 181 | 191 | 172 | 117 |
| 54  | 31  | 44  | 46  | 68  | 76  | 83  | 94  | 88  | 52  |
| 34  | 45  | 41  | 58  | 93  | 56  | 51  | 48  | 63  | 44  |
| 65  | 65  | 70  | 52  | 57  | 57  | 65  | 64  | 62  | 49  |
| 44  | 38  | 51  | 47  | 48  | 50  | 70  | 65  | 72  | 39  |
| 56  | 39  | 57  | 142 | 199 | 178 | 187 | 143 | 190 | 94  |
| 8   | 13  | 22  | 5   | 3   | 9   | 4   | 10  | 7   | 13  |
| 16  | 19  | 15  | 18  | 13  | 15  | 18  | 15  | 15  | 14  |
| 88  | 93  | 87  | 117 | 162 | 158 | 150 | 146 | 173 | 105 |
| 90  | 84  | 104 | 74  | 89  | 80  | 78  | 90  | 89  | 74  |
| 38  | 50  | 47  | 94  | 91  | 102 | 91  | 60  | 72  | 52  |
| 88  | 81  | 103 | 152 | 186 | 156 | 203 | 197 | 219 | 139 |
| 31  | 44  | 53  | 123 | 175 | 160 | 137 | 103 | 126 | 69  |
| 22  | 18  | 30  | 143 | 173 | 117 | 94  | 84  | 100 | 54  |

|     |     |     |     |     |     |     |     |     |     |
|-----|-----|-----|-----|-----|-----|-----|-----|-----|-----|
| 35  | 50  | 62  | 115 | 150 | 131 | 216 | 198 | 220 | 105 |
| 63  | 64  | 66  | 131 | 155 | 123 | 101 | 93  | 110 | 49  |
| 65  | 54  | 71  | 123 | 154 | 119 | 169 | 155 | 172 | 93  |
| 100 | 80  | 81  | 74  | 64  | 72  | 68  | 45  | 84  | 45  |
| 13  | 22  | 18  | 33  | 33  | 27  | 36  | 27  | 28  | 20  |
| 41  | 25  | 52  | 38  | 29  | 27  | 33  | 42  | 48  | 31  |
| 41  | 66  | 62  | 162 | 268 | 228 | 254 | 211 | 244 | 109 |
| 51  | 54  | 63  | 137 | 186 | 154 | 135 | 147 | 163 | 76  |
| 13  | 13  | 19  | 13  | 11  | 12  | 9   | 7   | 15  | 19  |
| 30  | 28  | 27  | 17  | 21  | 24  | 15  | 18  | 17  | 26  |
| 85  | 91  | 94  | 60  | 76  | 81  | 75  | 94  | 80  | 79  |
| 42  | 51  | 50  | 49  | 50  | 46  | 52  | 61  | 52  | 54  |
| 98  | 105 | 125 | 107 | 123 | 108 | 194 | 151 | 172 | 108 |
| 36  | 30  | 26  | 26  | 32  | 32  | 31  | 28  | 34  | 23  |
| 4   | 7   | 4   | 1   | 8   | 9   | 11  | 8   | 11  | 2   |
| 71  | 65  | 90  | 45  | 88  | 56  | 98  | 84  | 101 | 70  |
| 60  | 65  | 52  | 98  | 139 | 143 | 141 | 137 | 149 | 74  |
| 40  | 40  | 37  | 50  | 53  | 54  | 40  | 40  | 38  | 40  |
| 84  | 96  | 97  | 46  | 58  | 63  | 104 | 83  | 105 | 80  |
| 123 | 113 | 131 | 121 | 149 | 122 | 222 | 204 | 218 | 126 |
| 62  | 71  | 85  | 57  | 66  | 62  | 65  | 84  | 96  | 84  |
| 40  | 46  | 52  | 37  | 54  | 32  | 49  | 37  | 36  | 38  |
| 116 | 141 | 156 | 146 | 187 | 145 | 215 | 222 | 237 | 216 |
| 39  | 30  | 42  | 43  | 68  | 69  | 58  | 51  | 68  | 21  |
| 43  | 42  | 39  | 72  | 62  | 59  | 60  | 63  | 71  | 46  |
| 21  | 15  | 16  | 52  | 64  | 42  | 50  | 26  | 41  | 31  |
| 74  | 90  | 91  | 149 | 148 | 178 | 152 | 128 | 140 | 79  |
| 55  | 50  | 73  | 76  | 78  | 59  | 108 | 99  | 112 | 61  |
| 77  | 71  | 81  | 70  | 112 | 90  | 121 | 156 | 158 | 102 |
| 55  | 44  | 63  | 91  | 103 | 94  | 91  | 91  | 116 | 75  |
| 38  | 32  | 42  | 30  | 59  | 52  | 40  | 53  | 57  | 33  |
| 48  | 49  | 43  | 33  | 37  | 34  | 41  | 36  | 35  | 31  |
| 45  | 47  | 37  | 59  | 90  | 77  | 84  | 61  | 83  | 45  |
| 34  | 35  | 41  | 59  | 45  | 54  | 35  | 43  | 48  | 32  |
| 68  | 56  | 85  | 105 | 145 | 116 | 145 | 127 | 142 | 75  |
| 35  | 26  | 37  | 20  | 24  | 20  | 20  | 30  | 23  | 18  |
| 23  | 39  | 34  | 99  | 143 | 114 | 84  | 83  | 82  | 54  |
| 43  | 38  | 49  | 65  | 75  | 67  | 89  | 87  | 98  | 58  |
| 90  | 77  | 91  | 76  | 105 | 75  | 156 | 103 | 128 | 85  |
| 19  | 22  | 23  | 19  | 18  | 16  | 30  | 17  | 22  | 12  |
| 64  | 53  | 61  | 52  | 64  | 72  | 92  | 83  | 94  | 66  |

|     |     |     |     |     |     |     |     |     |     |
|-----|-----|-----|-----|-----|-----|-----|-----|-----|-----|
| 61  | 58  | 84  | 66  | 77  | 79  | 109 | 110 | 119 | 65  |
| 75  | 75  | 81  | 84  | 121 | 103 | 191 | 191 | 238 | 118 |
| 54  | 57  | 63  | 96  | 126 | 109 | 133 | 138 | 167 | 88  |
| 52  | 56  | 56  | 64  | 72  | 83  | 67  | 64  | 61  | 54  |
| 21  | 16  | 26  | 32  | 50  | 58  | 19  | 28  | 44  | 19  |
| 46  | 48  | 45  | 60  | 75  | 59  | 87  | 65  | 75  | 50  |
| 50  | 51  | 58  | 62  | 81  | 62  | 72  | 61  | 61  | 60  |
| 35  | 49  | 53  | 122 | 156 | 127 | 89  | 73  | 91  | 62  |
| 124 | 112 | 103 | 99  | 114 | 101 | 181 | 122 | 145 | 106 |
| 23  | 34  | 36  | 57  | 73  | 64  | 63  | 65  | 65  | 50  |
| 19  | 30  | 40  | 21  | 19  | 13  | 35  | 22  | 40  | 32  |
| 49  | 47  | 58  | 51  | 48  | 38  | 58  | 50  | 64  | 37  |
| 74  | 69  | 72  | 92  | 103 | 103 | 88  | 87  | 99  | 59  |
| 35  | 38  | 45  | 107 | 118 | 112 | 85  | 84  | 91  | 66  |
| 49  | 59  | 41  | 79  | 116 | 83  | 82  | 65  | 81  | 44  |
| 34  | 21  | 19  | 28  | 27  | 31  | 51  | 25  | 27  | 24  |
| 30  | 26  | 23  | 12  | 16  | 23  | 15  | 14  | 13  | 17  |
| 29  | 27  | 20  | 64  | 67  | 63  | 92  | 82  | 102 | 58  |
| 40  | 51  | 47  | 55  | 53  | 47  | 55  | 58  | 72  | 41  |
| 118 | 156 | 161 | 229 | 321 | 279 | 222 | 205 | 225 | 177 |
| 83  | 66  | 103 | 97  | 124 | 114 | 102 | 94  | 131 | 108 |
| 70  | 76  | 66  | 122 | 163 | 121 | 148 | 99  | 137 | 75  |
| 162 | 193 | 181 | 237 | 282 | 256 | 337 | 257 | 343 | 211 |
| 45  | 59  | 54  | 92  | 107 | 91  | 56  | 61  | 75  | 66  |
| 135 | 113 | 124 | 78  | 99  | 97  | 123 | 118 | 129 | 107 |
| 27  | 23  | 30  | 84  | 103 | 70  | 71  | 67  | 58  | 35  |
| 70  | 60  | 68  | 60  | 94  | 72  | 94  | 83  | 84  | 73  |
| 71  | 86  | 78  | 103 | 105 | 109 | 160 | 133 | 172 | 93  |
| 17  | 21  | 24  | 36  | 35  | 34  | 34  | 29  | 47  | 23  |
| 15  | 33  | 26  | 43  | 38  | 37  | 59  | 46  | 51  | 45  |
| 26  | 41  | 53  | 21  | 22  | 29  | 21  | 22  | 23  | 33  |
| 18  | 23  | 30  | 44  | 37  | 32  | 33  | 37  | 46  | 31  |
| 33  | 16  | 22  | 49  | 54  | 42  | 34  | 35  | 25  | 30  |
| 25  | 26  | 26  | 16  | 29  | 14  | 35  | 30  | 36  | 22  |
| 94  | 92  | 90  | 98  | 135 | 126 | 128 | 83  | 126 | 81  |
| 41  | 42  | 44  | 72  | 69  | 70  | 52  | 40  | 66  | 46  |
| 24  | 33  | 28  | 45  | 38  | 35  | 45  | 32  | 36  | 36  |
| 41  | 42  | 50  | 45  | 65  | 53  | 61  | 72  | 63  | 25  |
| 39  | 30  | 46  | 16  | 26  | 25  | 38  | 40  | 27  | 43  |
| 91  | 85  | 79  | 76  | 109 | 101 | 112 | 106 | 99  | 67  |
| 23  | 22  | 27  | 18  | 25  | 18  | 25  | 24  | 25  | 31  |

|     |     |     |     |     |     |     |     |     |     |
|-----|-----|-----|-----|-----|-----|-----|-----|-----|-----|
| 46  | 29  | 28  | 24  | 29  | 25  | 29  | 22  | 19  | 27  |
| 43  | 45  | 39  | 54  | 59  | 63  | 49  | 46  | 49  | 27  |
| 43  | 48  | 45  | 48  | 63  | 65  | 66  | 74  | 76  | 61  |
| 39  | 48  | 49  | 69  | 64  | 57  | 64  | 71  | 96  | 54  |
| 42  | 41  | 67  | 87  | 89  | 71  | 84  | 105 | 90  | 61  |
| 16  | 23  | 23  | 15  | 24  | 24  | 37  | 24  | 22  | 19  |
| 13  | 16  | 14  | 9   | 21  | 23  | 7   | 11  | 8   | 19  |
| 60  | 60  | 63  | 48  | 68  | 63  | 88  | 86  | 110 | 73  |
| 81  | 79  | 96  | 73  | 81  | 86  | 82  | 83  | 86  | 77  |
| 40  | 42  | 40  | 107 | 149 | 144 | 106 | 92  | 112 | 64  |
| 48  | 51  | 50  | 61  | 99  | 83  | 70  | 94  | 105 | 73  |
| 43  | 32  | 39  | 77  | 94  | 93  | 70  | 93  | 77  | 49  |
| 70  | 57  | 56  | 60  | 58  | 68  | 87  | 64  | 88  | 72  |
| 5   | 7   | 3   | 4   | 5   | 5   | 12  | 7   | 9   | 5   |
| 43  | 35  | 49  | 37  | 53  | 34  | 44  | 40  | 40  | 35  |
| 24  | 33  | 28  | 18  | 22  | 14  | 19  | 13  | 13  | 12  |
| 23  | 18  | 37  | 34  | 55  | 46  | 45  | 33  | 47  | 36  |
| 29  | 35  | 40  | 56  | 62  | 59  | 59  | 52  | 49  | 49  |
| 40  | 26  | 37  | 29  | 21  | 21  | 24  | 27  | 29  | 33  |
| 49  | 53  | 58  | 17  | 16  | 19  | 29  | 23  | 28  | 23  |
| 80  | 97  | 95  | 129 | 175 | 123 | 171 | 140 | 153 | 102 |
| 57  | 60  | 73  | 74  | 116 | 99  | 123 | 128 | 131 | 76  |
| 48  | 43  | 57  | 55  | 42  | 60  | 59  | 40  | 50  | 53  |
| 25  | 18  | 22  | 9   | 18  | 18  | 19  | 17  | 21  | 24  |
| 48  | 62  | 67  | 105 | 131 | 100 | 118 | 122 | 115 | 80  |
| 48  | 39  | 47  | 221 | 319 | 293 | 342 | 281 | 312 | 160 |
| 143 | 146 | 178 | 151 | 188 | 194 | 205 | 228 | 219 | 179 |
| 45  | 49  | 58  | 92  | 143 | 116 | 142 | 139 | 131 | 74  |
| 37  | 36  | 46  | 19  | 18  | 21  | 26  | 28  | 18  | 27  |
| 55  | 53  | 67  | 123 | 156 | 135 | 79  | 90  | 97  | 69  |
| 59  | 46  | 51  | 101 | 154 | 121 | 186 | 158 | 179 | 78  |
| 34  | 26  | 20  | 21  | 27  | 19  | 22  | 24  | 26  | 23  |
| 28  | 41  | 38  | 39  | 55  | 38  | 45  | 37  | 44  | 35  |
| 51  | 43  | 53  | 47  | 50  | 44  | 57  | 61  | 56  | 48  |
| 33  | 56  | 52  | 53  | 75  | 65  | 80  | 79  | 76  | 46  |
| 71  | 60  | 91  | 64  | 112 | 72  | 74  | 61  | 66  | 38  |
| 40  | 47  | 46  | 48  | 68  | 61  | 64  | 56  | 68  | 36  |
| 38  | 46  | 51  | 41  | 53  | 38  | 51  | 56  | 61  | 38  |
| 26  | 24  | 31  | 163 | 176 | 170 | 153 | 143 | 179 | 80  |
| 60  | 61  | 40  | 51  | 61  | 78  | 69  | 58  | 69  | 37  |
| 25  | 23  | 35  | 35  | 56  | 61  | 72  | 54  | 36  | 35  |

|     |     |     |     |     |     |      |      |      |     |
|-----|-----|-----|-----|-----|-----|------|------|------|-----|
| 90  | 106 | 123 | 75  | 93  | 83  | 117  | 96   | 106  | 115 |
| 11  | 8   | 4   | 6   | 3   | 6   | 13   | 5    | 1    | 10  |
| 5   | 7   | 5   | 6   | 1   | 0   | 1    | 1    | 3    | 6   |
| 28  | 21  | 28  | 36  | 36  | 24  | 35   | 29   | 27   | 24  |
| 23  | 26  | 30  | 31  | 31  | 31  | 40   | 30   | 44   | 31  |
| 69  | 69  | 78  | 83  | 79  | 85  | 74   | 69   | 92   | 70  |
| 48  | 67  | 66  | 97  | 143 | 117 | 120  | 119  | 142  | 92  |
| 35  | 25  | 42  | 56  | 75  | 56  | 54   | 56   | 43   | 41  |
| 63  | 50  | 50  | 115 | 137 | 102 | 116  | 118  | 153  | 81  |
| 63  | 67  | 66  | 85  | 87  | 64  | 96   | 67   | 68   | 52  |
| 16  | 11  | 16  | 6   | 14  | 8   | 12   | 12   | 19   | 10  |
| 169 | 162 | 189 | 184 | 235 | 184 | 237  | 193  | 231  | 121 |
| 38  | 38  | 42  | 45  | 53  | 62  | 69   | 68   | 72   | 41  |
| 101 | 101 | 129 | 561 | 668 | 563 | 1195 | 1129 | 1267 | 531 |
| 4   | 9   | 2   | 8   | 15  | 12  | 11   | 4    | 5    | 2   |
| 62  | 75  | 64  | 75  | 98  | 87  | 45   | 55   | 47   | 62  |
| 189 | 207 | 217 | 76  | 100 | 81  | 114  | 123  | 129  | 80  |
| 26  | 30  | 29  | 63  | 91  | 62  | 61   | 60   | 67   | 38  |
| 45  | 55  | 48  | 59  | 79  | 90  | 70   | 77   | 72   | 58  |
| 51  | 54  | 36  | 72  | 75  | 76  | 55   | 38   | 55   | 46  |
| 15  | 10  | 9   | 11  | 15  | 18  | 8    | 19   | 15   | 5   |
| 41  | 38  | 42  | 32  | 33  | 37  | 28   | 35   | 29   | 23  |
| 46  | 56  | 56  | 55  | 73  | 67  | 61   | 60   | 67   | 42  |
| 180 | 194 | 208 | 104 | 117 | 117 | 178  | 154  | 164  | 155 |
| 42  | 40  | 38  | 105 | 113 | 83  | 107  | 91   | 98   | 58  |
| 19  | 29  | 25  | 33  | 46  | 25  | 30   | 36   | 39   | 16  |
| 50  | 56  | 76  | 23  | 28  | 22  | 34   | 41   | 52   | 38  |
| 79  | 69  | 86  | 60  | 95  | 73  | 105  | 103  | 120  | 92  |
| 35  | 41  | 38  | 37  | 32  | 37  | 38   | 32   | 34   | 28  |
| 26  | 40  | 34  | 18  | 15  | 9   | 16   | 19   | 22   | 20  |
| 81  | 88  | 93  | 101 | 116 | 114 | 134  | 140  | 159  | 99  |
| 58  | 63  | 69  | 67  | 72  | 83  | 88   | 72   | 61   | 56  |
| 38  | 32  | 37  | 22  | 31  | 21  | 52   | 43   | 41   | 39  |
| 66  | 61  | 57  | 87  | 108 | 103 | 77   | 68   | 71   | 47  |
| 114 | 102 | 108 | 145 | 166 | 150 | 174  | 181  | 170  | 119 |
| 42  | 29  | 23  | 12  | 19  | 20  | 30   | 26   | 28   | 22  |
| 50  | 51  | 52  | 50  | 72  | 55  | 72   | 60   | 61   | 39  |
| 28  | 23  | 25  | 12  | 17  | 24  | 23   | 20   | 17   | 31  |
| 114 | 109 | 100 | 90  | 126 | 103 | 162  | 100  | 161  | 98  |
| 40  | 43  | 50  | 23  | 46  | 38  | 34   | 32   | 39   | 39  |
| 56  | 38  | 66  | 74  | 87  | 68  | 86   | 90   | 91   | 52  |

|     |     |     |     |     |     |     |     |     |     |
|-----|-----|-----|-----|-----|-----|-----|-----|-----|-----|
| 59  | 59  | 65  | 70  | 97  | 76  | 129 | 106 | 88  | 60  |
| 30  | 26  | 23  | 16  | 31  | 26  | 17  | 24  | 24  | 18  |
| 129 | 117 | 147 | 158 | 173 | 159 | 240 | 210 | 219 | 145 |
| 55  | 49  | 61  | 61  | 78  | 68  | 81  | 71  | 76  | 57  |
| 65  | 64  | 71  | 29  | 45  | 44  | 44  | 39  | 47  | 55  |
| 65  | 89  | 76  | 88  | 95  | 115 | 110 | 126 | 153 | 75  |
| 30  | 39  | 40  | 38  | 49  | 34  | 41  | 35  | 46  | 38  |
| 26  | 37  | 35  | 21  | 38  | 32  | 20  | 16  | 20  | 26  |
| 59  | 52  | 65  | 111 | 100 | 91  | 118 | 107 | 128 | 65  |
| 35  | 39  | 48  | 46  | 61  | 69  | 66  | 48  | 65  | 47  |
| 38  | 39  | 46  | 19  | 14  | 14  | 19  | 19  | 25  | 27  |
| 45  | 57  | 46  | 50  | 57  | 49  | 53  | 67  | 57  | 53  |
| 57  | 69  | 56  | 64  | 80  | 83  | 54  | 62  | 66  | 75  |
| 58  | 55  | 64  | 138 | 165 | 147 | 135 | 116 | 105 | 69  |
| 55  | 75  | 88  | 156 | 170 | 184 | 220 | 178 | 189 | 99  |
| 35  | 44  | 46  | 51  | 75  | 50  | 80  | 66  | 62  | 49  |
| 43  | 48  | 45  | 102 | 132 | 122 | 193 | 205 | 241 | 98  |
| 56  | 63  | 51  | 67  | 76  | 83  | 83  | 79  | 80  | 71  |
| 57  | 64  | 50  | 78  | 106 | 91  | 86  | 76  | 72  | 67  |
| 44  | 34  | 49  | 58  | 71  | 56  | 84  | 62  | 75  | 45  |
| 67  | 71  | 82  | 64  | 72  | 61  | 130 | 155 | 123 | 64  |
| 153 | 157 | 156 | 99  | 123 | 111 | 148 | 144 | 146 | 138 |
| 53  | 76  | 59  | 74  | 120 | 107 | 85  | 119 | 88  | 68  |
| 59  | 55  | 64  | 53  | 68  | 76  | 71  | 85  | 69  | 56  |
| 25  | 26  | 32  | 20  | 22  | 22  | 26  | 14  | 26  | 20  |
| 46  | 36  | 47  | 63  | 91  | 87  | 81  | 47  | 75  | 31  |
| 86  | 78  | 83  | 79  | 77  | 77  | 95  | 98  | 105 | 82  |
| 15  | 17  | 16  | 19  | 28  | 11  | 20  | 13  | 30  | 17  |
| 43  | 61  | 65  | 76  | 106 | 96  | 144 | 137 | 143 | 95  |
| 49  | 64  | 62  | 39  | 38  | 30  | 31  | 19  | 37  | 34  |
| 20  | 35  | 38  | 30  | 26  | 35  | 53  | 44  | 60  | 48  |
| 62  | 53  | 49  | 189 | 254 | 257 | 210 | 231 | 244 | 107 |
| 14  | 13  | 12  | 17  | 20  | 25  | 27  | 15  | 33  | 13  |
| 33  | 39  | 30  | 28  | 26  | 39  | 32  | 31  | 31  | 28  |
| 34  | 30  | 43  | 45  | 42  | 30  | 48  | 41  | 52  | 45  |
| 60  | 64  | 72  | 162 | 235 | 193 | 187 | 141 | 180 | 102 |
| 92  | 62  | 78  | 162 | 184 | 144 | 152 | 123 | 167 | 88  |
| 8   | 3   | 8   | 4   | 9   | 14  | 13  | 10  | 11  | 10  |
| 56  | 63  | 58  | 54  | 53  | 49  | 58  | 55  | 67  | 67  |
| 134 | 124 | 152 | 74  | 93  | 79  | 122 | 128 | 139 | 98  |
| 61  | 76  | 74  | 105 | 128 | 126 | 118 | 124 | 123 | 64  |

|     |     |     |     |     |     |     |     |     |     |
|-----|-----|-----|-----|-----|-----|-----|-----|-----|-----|
| 25  | 30  | 27  | 31  | 23  | 29  | 15  | 15  | 14  | 24  |
| 47  | 31  | 39  | 57  | 68  | 63  | 72  | 60  | 65  | 41  |
| 59  | 61  | 40  | 31  | 55  | 36  | 57  | 44  | 62  | 38  |
| 50  | 72  | 75  | 99  | 119 | 102 | 114 | 102 | 115 | 73  |
| 91  | 93  | 112 | 83  | 122 | 92  | 126 | 119 | 107 | 95  |
| 76  | 67  | 89  | 60  | 95  | 82  | 93  | 94  | 78  | 58  |
| 63  | 66  | 65  | 72  | 93  | 74  | 76  | 69  | 85  | 61  |
| 43  | 44  | 43  | 48  | 56  | 53  | 49  | 37  | 46  | 38  |
| 32  | 31  | 35  | 13  | 14  | 18  | 17  | 20  | 22  | 30  |
| 53  | 51  | 59  | 191 | 228 | 225 | 225 | 205 | 242 | 105 |
| 102 | 92  | 94  | 51  | 52  | 46  | 62  | 50  | 60  | 46  |
| 206 | 208 | 234 | 291 | 379 | 349 | 556 | 524 | 573 | 359 |
| 49  | 42  | 43  | 55  | 52  | 57  | 65  | 48  | 47  | 51  |
| 28  | 38  | 34  | 95  | 99  | 105 | 80  | 60  | 92  | 48  |
| 32  | 44  | 56  | 132 | 192 | 159 | 230 | 220 | 255 | 102 |
| 59  | 79  | 71  | 52  | 70  | 71  | 54  | 49  | 74  | 52  |
| 69  | 55  | 62  | 111 | 192 | 162 | 172 | 177 | 150 | 80  |
| 94  | 78  | 118 | 109 | 159 | 112 | 229 | 196 | 188 | 125 |
| 50  | 53  | 60  | 122 | 157 | 173 | 93  | 90  | 96  | 49  |
| 65  | 51  | 56  | 89  | 115 | 115 | 136 | 123 | 137 | 62  |
| 84  | 81  | 102 | 60  | 61  | 72  | 90  | 83  | 87  | 94  |
| 54  | 44  | 53  | 61  | 71  | 60  | 90  | 65  | 63  | 42  |
| 34  | 44  | 51  | 75  | 118 | 83  | 74  | 68  | 78  | 62  |
| 44  | 58  | 72  | 72  | 80  | 86  | 114 | 81  | 82  | 57  |
| 46  | 48  | 61  | 45  | 44  | 37  | 44  | 34  | 52  | 49  |
| 55  | 60  | 58  | 13  | 9   | 12  | 25  | 21  | 22  | 34  |
| 42  | 44  | 46  | 66  | 93  | 87  | 49  | 52  | 53  | 48  |
| 30  | 28  | 37  | 40  | 47  | 35  | 39  | 18  | 44  | 32  |
| 27  | 26  | 25  | 91  | 118 | 109 | 75  | 86  | 99  | 52  |
| 52  | 46  | 53  | 37  | 29  | 39  | 51  | 49  | 85  | 40  |
| 49  | 51  | 59  | 115 | 145 | 122 | 157 | 132 | 183 | 72  |
| 32  | 41  | 29  | 37  | 42  | 34  | 27  | 25  | 43  | 38  |
| 49  | 40  | 67  | 19  | 12  | 18  | 29  | 22  | 31  | 35  |
| 58  | 63  | 52  | 90  | 96  | 99  | 85  | 112 | 111 | 60  |
| 41  | 44  | 41  | 36  | 58  | 57  | 44  | 35  | 57  | 41  |
| 36  | 37  | 36  | 32  | 51  | 52  | 47  | 35  | 56  | 36  |
| 71  | 73  | 67  | 141 | 190 | 202 | 204 | 183 | 221 | 106 |
| 50  | 55  | 49  | 69  | 121 | 91  | 104 | 93  | 109 | 65  |
| 21  | 20  | 30  | 37  | 66  | 47  | 60  | 51  | 55  | 28  |
| 71  | 75  | 77  | 61  | 82  | 63  | 89  | 69  | 67  | 50  |
| 81  | 71  | 65  | 26  | 27  | 36  | 30  | 51  | 41  | 42  |

|     |     |     |     |     |     |     |     |     |     |
|-----|-----|-----|-----|-----|-----|-----|-----|-----|-----|
| 32  | 36  | 47  | 29  | 27  | 28  | 50  | 41  | 46  | 30  |
| 50  | 49  | 63  | 41  | 44  | 36  | 46  | 55  | 53  | 49  |
| 33  | 36  | 43  | 44  | 42  | 43  | 47  | 38  | 50  | 46  |
| 130 | 122 | 141 | 294 | 370 | 313 | 442 | 372 | 452 | 258 |
| 38  | 29  | 37  | 29  | 30  | 31  | 41  | 44  | 50  | 40  |
| 47  | 45  | 75  | 62  | 73  | 67  | 102 | 101 | 75  | 60  |
| 58  | 65  | 71  | 81  | 82  | 80  | 115 | 96  | 133 | 87  |
| 60  | 66  | 62  | 71  | 74  | 67  | 59  | 59  | 70  | 54  |
| 32  | 36  | 49  | 31  | 46  | 42  | 35  | 36  | 40  | 30  |
| 42  | 56  | 71  | 61  | 91  | 78  | 104 | 63  | 94  | 57  |
| 72  | 69  | 78  | 102 | 125 | 115 | 101 | 87  | 102 | 68  |
| 40  | 70  | 50  | 30  | 34  | 36  | 59  | 40  | 53  | 53  |
| 62  | 71  | 75  | 123 | 140 | 106 | 158 | 107 | 126 | 76  |
| 25  | 30  | 21  | 20  | 32  | 29  | 18  | 18  | 24  | 16  |
| 21  | 40  | 31  | 61  | 66  | 57  | 59  | 39  | 60  | 43  |
| 43  | 40  | 48  | 98  | 106 | 73  | 111 | 133 | 116 | 60  |
| 175 | 178 | 190 | 180 | 242 | 242 | 356 | 321 | 365 | 222 |
| 31  | 28  | 38  | 33  | 36  | 30  | 26  | 36  | 36  | 34  |
| 38  | 35  | 50  | 23  | 27  | 18  | 35  | 28  | 40  | 21  |
| 18  | 18  | 23  | 18  | 34  | 31  | 28  | 36  | 29  | 18  |
| 23  | 15  | 30  | 19  | 16  | 20  | 18  | 19  | 23  | 18  |
| 50  | 46  | 62  | 57  | 60  | 66  | 78  | 60  | 82  | 67  |
| 55  | 61  | 69  | 48  | 72  | 61  | 66  | 55  | 54  | 45  |
| 65  | 73  | 69  | 66  | 72  | 70  | 102 | 89  | 93  | 50  |
| 59  | 63  | 73  | 74  | 107 | 86  | 112 | 139 | 133 | 75  |
| 112 | 103 | 133 | 164 | 173 | 165 | 251 | 229 | 263 | 155 |
| 57  | 41  | 47  | 38  | 55  | 41  | 67  | 55  | 57  | 48  |
| 30  | 29  | 40  | 46  | 55  | 49  | 42  | 40  | 35  | 30  |
| 92  | 80  | 76  | 36  | 36  | 44  | 71  | 45  | 66  | 41  |
| 12  | 8   | 21  | 16  | 14  | 23  | 17  | 17  | 20  | 21  |
| 67  | 56  | 90  | 53  | 57  | 55  | 66  | 76  | 81  | 60  |
| 67  | 68  | 94  | 166 | 175 | 164 | 132 | 108 | 102 | 76  |
| 41  | 35  | 33  | 42  | 47  | 36  | 77  | 54  | 54  | 37  |
| 32  | 39  | 36  | 43  | 60  | 33  | 44  | 38  | 55  | 34  |
| 55  | 63  | 71  | 170 | 189 | 218 | 258 | 241 | 265 | 122 |
| 22  | 19  | 29  | 27  | 36  | 33  | 31  | 24  | 28  | 18  |
| 145 | 192 | 228 | 110 | 105 | 118 | 189 | 212 | 209 | 196 |
| 104 | 117 | 137 | 135 | 194 | 174 | 180 | 136 | 179 | 132 |
| 24  | 34  | 37  | 33  | 37  | 36  | 35  | 35  | 43  | 25  |
| 261 | 268 | 305 | 184 | 222 | 199 | 299 | 220 | 288 | 273 |
| 24  | 22  | 23  | 21  | 28  | 29  | 19  | 35  | 32  | 18  |



|    |    |     |     |     |     |     |     |     |     |
|----|----|-----|-----|-----|-----|-----|-----|-----|-----|
| 26 | 24 | 32  | 23  | 37  | 31  | 28  | 30  | 36  | 24  |
| 44 | 26 | 34  | 49  | 55  | 65  | 52  | 57  | 47  | 27  |
| 88 | 86 | 85  | 92  | 119 | 80  | 155 | 139 | 140 | 96  |
| 42 | 35 | 44  | 20  | 25  | 17  | 24  | 19  | 34  | 31  |
| 27 | 26 | 27  | 23  | 24  | 31  | 19  | 21  | 21  | 26  |
| 34 | 30 | 20  | 74  | 80  | 80  | 64  | 70  | 73  | 36  |
| 74 | 70 | 66  | 89  | 112 | 79  | 75  | 87  | 97  | 68  |
| 35 | 32 | 37  | 31  | 34  | 35  | 25  | 27  | 33  | 45  |
| 71 | 61 | 53  | 59  | 98  | 98  | 81  | 104 | 107 | 69  |
| 50 | 46 | 61  | 93  | 126 | 82  | 140 | 84  | 95  | 45  |
| 37 | 55 | 47  | 23  | 24  | 20  | 32  | 24  | 33  | 36  |
| 42 | 44 | 40  | 29  | 21  | 33  | 33  | 20  | 33  | 32  |
| 50 | 42 | 50  | 50  | 81  | 50  | 72  | 76  | 73  | 40  |
| 47 | 41 | 54  | 38  | 37  | 32  | 36  | 25  | 31  | 45  |
| 36 | 31 | 39  | 27  | 27  | 22  | 40  | 49  | 39  | 46  |
| 76 | 92 | 76  | 50  | 66  | 59  | 88  | 81  | 84  | 88  |
| 51 | 46 | 50  | 89  | 94  | 90  | 117 | 90  | 99  | 70  |
| 35 | 37 | 41  | 20  | 40  | 28  | 28  | 22  | 22  | 35  |
| 66 | 50 | 73  | 55  | 57  | 61  | 76  | 70  | 72  | 52  |
| 46 | 49 | 54  | 60  | 71  | 62  | 53  | 50  | 50  | 60  |
| 32 | 30 | 31  | 35  | 45  | 31  | 42  | 37  | 39  | 31  |
| 42 | 30 | 43  | 55  | 88  | 70  | 44  | 46  | 51  | 41  |
| 74 | 87 | 90  | 63  | 112 | 119 | 130 | 127 | 136 | 107 |
| 73 | 82 | 100 | 70  | 117 | 87  | 142 | 173 | 174 | 100 |
| 12 | 12 | 17  | 18  | 20  | 8   | 17  | 17  | 18  | 14  |
| 72 | 70 | 74  | 57  | 107 | 60  | 103 | 106 | 106 | 84  |
| 15 | 32 | 19  | 28  | 52  | 30  | 52  | 53  | 60  | 42  |
| 73 | 75 | 93  | 121 | 153 | 144 | 150 | 137 | 130 | 105 |
| 26 | 25 | 33  | 61  | 83  | 66  | 62  | 72  | 78  | 41  |
| 94 | 96 | 118 | 79  | 126 | 100 | 175 | 195 | 190 | 99  |
| 43 | 36 | 44  | 53  | 57  | 52  | 68  | 46  | 76  | 40  |
| 32 | 26 | 28  | 39  | 55  | 47  | 32  | 34  | 36  | 42  |
| 37 | 47 | 37  | 111 | 136 | 123 | 184 | 161 | 179 | 83  |
| 45 | 51 | 53  | 114 | 146 | 118 | 98  | 97  | 104 | 71  |
| 22 | 16 | 21  | 17  | 20  | 13  | 26  | 22  | 23  | 11  |
| 62 | 68 | 68  | 96  | 141 | 113 | 136 | 138 | 139 | 68  |
| 52 | 41 | 53  | 50  | 58  | 63  | 68  | 44  | 40  | 38  |
| 55 | 64 | 53  | 29  | 30  | 34  | 33  | 50  | 52  | 48  |
| 33 | 43 | 34  | 47  | 62  | 43  | 47  | 43  | 45  | 56  |
| 39 | 53 | 54  | 6   | 7   | 4   | 12  | 18  | 12  | 35  |
| 60 | 74 | 78  | 84  | 87  | 69  | 94  | 90  | 104 | 71  |

|     |     |     |     |     |     |     |     |     |     |
|-----|-----|-----|-----|-----|-----|-----|-----|-----|-----|
| 62  | 62  | 67  | 73  | 108 | 85  | 137 | 136 | 149 | 76  |
| 51  | 58  | 65  | 71  | 70  | 66  | 82  | 73  | 86  | 66  |
| 4   | 3   | 8   | 2   | 5   | 1   | 3   | 1   | 3   | 2   |
| 54  | 57  | 61  | 175 | 201 | 170 | 232 | 205 | 254 | 115 |
| 70  | 76  | 73  | 69  | 60  | 66  | 88  | 62  | 58  | 66  |
| 53  | 56  | 60  | 86  | 88  | 81  | 91  | 68  | 86  | 62  |
| 29  | 36  | 35  | 13  | 17  | 8   | 7   | 7   | 9   | 23  |
| 11  | 7   | 15  | 27  | 41  | 28  | 28  | 20  | 23  | 9   |
| 6   | 10  | 14  | 14  | 7   | 14  | 23  | 13  | 17  | 20  |
| 63  | 84  | 78  | 95  | 116 | 111 | 107 | 133 | 134 | 98  |
| 88  | 97  | 80  | 75  | 76  | 77  | 83  | 78  | 91  | 78  |
| 6   | 10  | 6   | 34  | 38  | 19  | 21  | 5   | 14  | 5   |
| 15  | 20  | 26  | 47  | 44  | 46  | 65  | 56  | 59  | 25  |
| 73  | 59  | 67  | 73  | 80  | 61  | 78  | 75  | 63  | 41  |
| 47  | 53  | 38  | 63  | 76  | 61  | 39  | 37  | 44  | 41  |
| 28  | 23  | 20  | 9   | 14  | 15  | 14  | 10  | 19  | 16  |
| 24  | 27  | 31  | 33  | 53  | 41  | 41  | 29  | 44  | 25  |
| 20  | 26  | 24  | 36  | 51  | 54  | 72  | 61  | 49  | 29  |
| 83  | 84  | 90  | 54  | 66  | 44  | 86  | 98  | 103 | 86  |
| 51  | 36  | 47  | 28  | 31  | 30  | 32  | 38  | 27  | 31  |
| 59  | 88  | 87  | 122 | 155 | 146 | 132 | 134 | 138 | 88  |
| 53  | 43  | 45  | 68  | 96  | 100 | 95  | 97  | 106 | 55  |
| 14  | 35  | 34  | 31  | 37  | 30  | 40  | 26  | 40  | 21  |
| 30  | 37  | 30  | 28  | 59  | 20  | 29  | 23  | 18  | 27  |
| 53  | 48  | 57  | 67  | 94  | 52  | 85  | 77  | 83  | 49  |
| 57  | 72  | 66  | 66  | 90  | 92  | 64  | 91  | 89  | 72  |
| 40  | 38  | 37  | 25  | 24  | 19  | 25  | 28  | 22  | 27  |
| 42  | 44  | 64  | 59  | 63  | 61  | 32  | 43  | 50  | 38  |
| 45  | 55  | 48  | 32  | 33  | 42  | 62  | 54  | 51  | 54  |
| 52  | 42  | 51  | 12  | 11  | 13  | 16  | 18  | 26  | 23  |
| 50  | 61  | 54  | 83  | 100 | 101 | 115 | 83  | 115 | 78  |
| 26  | 38  | 30  | 10  | 20  | 10  | 16  | 14  | 10  | 19  |
| 64  | 55  | 43  | 95  | 96  | 83  | 150 | 127 | 149 | 65  |
| 119 | 149 | 142 | 119 | 167 | 145 | 205 | 179 | 163 | 125 |
| 32  | 25  | 40  | 64  | 82  | 65  | 52  | 50  | 56  | 45  |
| 34  | 30  | 44  | 27  | 29  | 22  | 32  | 28  | 36  | 29  |
| 26  | 26  | 32  | 33  | 47  | 33  | 21  | 30  | 34  | 29  |
| 48  | 34  | 39  | 58  | 70  | 69  | 61  | 57  | 63  | 44  |
| 17  | 29  | 33  | 14  | 12  | 16  | 16  | 11  | 9   | 17  |
| 58  | 70  | 67  | 24  | 33  | 46  | 40  | 51  | 48  | 49  |
| 50  | 59  | 68  | 103 | 153 | 148 | 177 | 167 | 185 | 90  |

|     |     |     |     |     |     |     |     |     |     |
|-----|-----|-----|-----|-----|-----|-----|-----|-----|-----|
| 41  | 48  | 59  | 81  | 89  | 103 | 82  | 66  | 78  | 49  |
| 49  | 45  | 52  | 35  | 48  | 35  | 39  | 38  | 38  | 33  |
| 26  | 23  | 31  | 17  | 12  | 25  | 12  | 18  | 24  | 20  |
| 75  | 67  | 84  | 179 | 218 | 179 | 155 | 150 | 164 | 106 |
| 17  | 39  | 52  | 39  | 46  | 62  | 61  | 69  | 62  | 48  |
| 19  | 15  | 23  | 4   | 4   | 9   | 6   | 4   | 6   | 16  |
| 22  | 24  | 39  | 14  | 13  | 20  | 25  | 40  | 20  | 19  |
| 104 | 107 | 102 | 83  | 100 | 96  | 82  | 72  | 91  | 58  |
| 31  | 39  | 41  | 66  | 78  | 81  | 66  | 54  | 76  | 42  |
| 61  | 84  | 104 | 92  | 84  | 99  | 98  | 101 | 100 | 93  |
| 74  | 83  | 86  | 72  | 100 | 97  | 119 | 104 | 114 | 79  |
| 81  | 89  | 100 | 108 | 165 | 121 | 279 | 238 | 249 | 136 |
| 29  | 34  | 27  | 29  | 57  | 49  | 17  | 24  | 21  | 26  |
| 79  | 71  | 77  | 163 | 191 | 200 | 220 | 194 | 204 | 134 |
| 25  | 30  | 26  | 43  | 56  | 50  | 50  | 64  | 55  | 37  |
| 42  | 54  | 54  | 122 | 137 | 126 | 137 | 110 | 125 | 71  |
| 63  | 56  | 60  | 46  | 69  | 45  | 79  | 83  | 78  | 61  |
| 1   | 3   | 1   | 2   | 4   | 3   | 0   | 2   | 1   | 0   |
| 93  | 80  | 70  | 67  | 98  | 106 | 98  | 103 | 110 | 83  |
| 19  | 11  | 12  | 11  | 18  | 13  | 16  | 14  | 20  | 10  |
| 25  | 32  | 28  | 10  | 9   | 7   | 11  | 13  | 16  | 21  |
| 15  | 17  | 16  | 12  | 11  | 17  | 10  | 15  | 7   | 11  |
| 38  | 32  | 23  | 12  | 17  | 18  | 13  | 17  | 17  | 19  |
| 31  | 21  | 31  | 39  | 56  | 62  | 72  | 75  | 75  | 35  |
| 38  | 60  | 67  | 122 | 155 | 129 | 140 | 147 | 144 | 69  |
| 41  | 31  | 35  | 37  | 60  | 51  | 77  | 68  | 70  | 45  |
| 27  | 22  | 17  | 6   | 4   | 11  | 16  | 10  | 13  | 22  |
| 56  | 53  | 51  | 375 | 515 | 427 | 267 | 217 | 262 | 100 |
| 57  | 45  | 63  | 18  | 22  | 21  | 17  | 22  | 20  | 38  |
| 37  | 30  | 32  | 51  | 67  | 48  | 81  | 83  | 78  | 45  |
| 50  | 56  | 51  | 39  | 43  | 34  | 36  | 23  | 25  | 32  |
| 13  | 18  | 23  | 22  | 24  | 13  | 37  | 46  | 49  | 25  |
| 36  | 22  | 35  | 21  | 17  | 25  | 21  | 19  | 26  | 25  |
| 36  | 50  | 49  | 37  | 45  | 36  | 65  | 56  | 70  | 30  |
| 28  | 25  | 44  | 77  | 97  | 79  | 79  | 99  | 87  | 42  |
| 41  | 38  | 52  | 54  | 61  | 47  | 78  | 74  | 88  | 47  |
| 89  | 101 | 124 | 147 | 244 | 191 | 185 | 170 | 209 | 143 |
| 15  | 17  | 17  | 26  | 43  | 28  | 18  | 17  | 24  | 19  |
| 64  | 57  | 60  | 73  | 88  | 71  | 65  | 74  | 74  | 62  |
| 82  | 99  | 130 | 129 | 147 | 138 | 134 | 121 | 140 | 78  |
| 45  | 35  | 38  | 35  | 29  | 41  | 34  | 33  | 35  | 36  |

|     |     |     |     |     |     |     |     |     |     |
|-----|-----|-----|-----|-----|-----|-----|-----|-----|-----|
| 70  | 68  | 80  | 282 | 408 | 327 | 482 | 438 | 483 | 181 |
| 48  | 50  | 42  | 28  | 46  | 47  | 51  | 39  | 44  | 29  |
| 38  | 32  | 36  | 78  | 82  | 90  | 65  | 58  | 60  | 32  |
| 33  | 31  | 32  | 47  | 40  | 40  | 49  | 58  | 49  | 40  |
| 73  | 88  | 81  | 65  | 72  | 74  | 80  | 80  | 83  | 53  |
| 46  | 40  | 41  | 82  | 104 | 98  | 117 | 122 | 116 | 67  |
| 33  | 40  | 40  | 108 | 114 | 81  | 78  | 67  | 74  | 39  |
| 43  | 47  | 48  | 21  | 60  | 40  | 47  | 47  | 33  | 40  |
| 108 | 113 | 131 | 151 | 197 | 176 | 196 | 180 | 203 | 130 |
| 63  | 56  | 47  | 72  | 93  | 86  | 81  | 65  | 88  | 54  |
| 9   | 12  | 14  | 2   | 3   | 4   | 5   | 3   | 2   | 9   |
| 75  | 64  | 77  | 85  | 93  | 70  | 117 | 114 | 135 | 48  |
| 50  | 40  | 44  | 34  | 45  | 50  | 55  | 44  | 54  | 46  |
| 48  | 66  | 72  | 93  | 111 | 94  | 116 | 89  | 92  | 75  |
| 66  | 63  | 78  | 60  | 82  | 81  | 118 | 115 | 135 | 68  |
| 87  | 91  | 101 | 104 | 134 | 112 | 166 | 143 | 196 | 95  |
| 45  | 38  | 58  | 38  | 43  | 28  | 23  | 33  | 34  | 35  |
| 51  | 40  | 50  | 43  | 64  | 54  | 77  | 63  | 89  | 37  |
| 94  | 112 | 123 | 106 | 131 | 140 | 130 | 116 | 127 | 86  |
| 25  | 45  | 41  | 46  | 50  | 57  | 37  | 56  | 61  | 29  |
| 46  | 52  | 57  | 29  | 32  | 29  | 41  | 33  | 42  | 45  |
| 31  | 35  | 25  | 33  | 41  | 26  | 51  | 46  | 68  | 40  |
| 57  | 59  | 44  | 62  | 74  | 81  | 88  | 68  | 81  | 57  |
| 40  | 41  | 60  | 88  | 102 | 89  | 110 | 90  | 107 | 67  |
| 30  | 21  | 28  | 32  | 52  | 29  | 39  | 38  | 41  | 30  |
| 24  | 24  | 28  | 5   | 13  | 18  | 9   | 9   | 11  | 24  |
| 18  | 16  | 21  | 21  | 33  | 37  | 38  | 30  | 33  | 26  |
| 57  | 78  | 82  | 108 | 109 | 69  | 161 | 129 | 141 | 91  |
| 4   | 2   | 10  | 6   | 7   | 2   | 4   | 3   | 2   | 7   |
| 52  | 40  | 32  | 45  | 57  | 50  | 36  | 39  | 52  | 27  |
| 48  | 35  | 57  | 73  | 88  | 67  | 170 | 193 | 186 | 91  |
| 66  | 72  | 64  | 55  | 62  | 54  | 78  | 84  | 86  | 46  |
| 62  | 44  | 45  | 39  | 59  | 46  | 63  | 53  | 44  | 52  |
| 22  | 29  | 38  | 25  | 34  | 21  | 25  | 12  | 22  | 19  |
| 28  | 38  | 39  | 94  | 131 | 96  | 124 | 119 | 112 | 69  |
| 22  | 20  | 30  | 36  | 40  | 29  | 36  | 37  | 42  | 32  |
| 67  | 83  | 65  | 51  | 78  | 70  | 56  | 49  | 65  | 59  |
| 21  | 17  | 21  | 18  | 28  | 24  | 11  | 14  | 15  | 15  |
| 22  | 21  | 23  | 60  | 82  | 87  | 67  | 82  | 70  | 41  |
| 66  | 69  | 54  | 42  | 51  | 50  | 71  | 84  | 75  | 56  |
| 62  | 70  | 59  | 69  | 86  | 69  | 84  | 84  | 75  | 62  |

|     |     |     |     |     |     |     |     |     |     |
|-----|-----|-----|-----|-----|-----|-----|-----|-----|-----|
| 35  | 29  | 45  | 31  | 32  | 36  | 44  | 58  | 51  | 36  |
| 34  | 38  | 41  | 80  | 102 | 93  | 88  | 86  | 88  | 63  |
| 70  | 57  | 60  | 82  | 124 | 95  | 114 | 123 | 111 | 71  |
| 69  | 51  | 65  | 46  | 59  | 70  | 66  | 59  | 43  | 63  |
| 85  | 67  | 79  | 67  | 105 | 83  | 89  | 97  | 93  | 77  |
| 90  | 84  | 104 | 53  | 88  | 70  | 121 | 122 | 117 | 97  |
| 39  | 38  | 39  | 23  | 37  | 35  | 37  | 25  | 25  | 36  |
| 41  | 63  | 58  | 66  | 81  | 59  | 89  | 68  | 80  | 60  |
| 71  | 86  | 76  | 113 | 132 | 122 | 202 | 185 | 147 | 101 |
| 112 | 132 | 132 | 79  | 76  | 90  | 112 | 106 | 110 | 131 |
| 47  | 67  | 53  | 48  | 60  | 53  | 72  | 56  | 54  | 41  |
| 42  | 40  | 53  | 70  | 92  | 74  | 88  | 75  | 63  | 41  |
| 26  | 27  | 22  | 36  | 39  | 31  | 18  | 22  | 30  | 18  |
| 63  | 68  | 81  | 111 | 149 | 106 | 125 | 124 | 149 | 70  |
| 23  | 15  | 19  | 20  | 14  | 17  | 14  | 18  | 16  | 21  |
| 58  | 48  | 62  | 132 | 179 | 158 | 84  | 86  | 88  | 67  |
| 43  | 55  | 45  | 71  | 99  | 79  | 82  | 65  | 89  | 51  |
| 57  | 68  | 62  | 35  | 38  | 33  | 40  | 34  | 36  | 29  |
| 82  | 93  | 109 | 108 | 110 | 114 | 174 | 149 | 154 | 96  |
| 75  | 78  | 91  | 121 | 123 | 128 | 210 | 153 | 204 | 107 |
| 115 | 142 | 138 | 100 | 159 | 131 | 168 | 145 | 183 | 136 |
| 62  | 44  | 58  | 52  | 60  | 82  | 108 | 83  | 104 | 57  |
| 43  | 35  | 52  | 59  | 72  | 54  | 85  | 59  | 66  | 47  |
| 34  | 43  | 49  | 68  | 66  | 65  | 77  | 81  | 93  | 35  |
| 28  | 53  | 46  | 20  | 18  | 30  | 28  | 33  | 35  | 40  |
| 29  | 28  | 32  | 133 | 173 | 113 | 110 | 82  | 101 | 51  |
| 27  | 28  | 39  | 27  | 36  | 30  | 31  | 27  | 28  | 19  |
| 54  | 62  | 57  | 38  | 59  | 49  | 42  | 45  | 39  | 44  |
| 63  | 65  | 77  | 84  | 114 | 96  | 139 | 145 | 154 | 102 |
| 94  | 96  | 112 | 81  | 85  | 91  | 69  | 82  | 68  | 58  |
| 40  | 49  | 73  | 70  | 78  | 63  | 119 | 106 | 119 | 57  |
| 40  | 51  | 49  | 50  | 51  | 41  | 82  | 52  | 65  | 52  |
| 17  | 15  | 15  | 6   | 10  | 6   | 14  | 8   | 11  | 11  |
| 64  | 87  | 84  | 83  | 100 | 93  | 142 | 152 | 127 | 97  |
| 57  | 63  | 58  | 129 | 176 | 117 | 165 | 135 | 148 | 74  |
| 63  | 50  | 61  | 106 | 124 | 122 | 72  | 81  | 76  | 64  |
| 29  | 26  | 41  | 28  | 47  | 27  | 33  | 32  | 43  | 20  |
| 43  | 43  | 42  | 26  | 51  | 38  | 52  | 45  | 41  | 48  |
| 47  | 41  | 42  | 49  | 47  | 44  | 92  | 73  | 79  | 54  |
| 48  | 55  | 72  | 35  | 66  | 53  | 57  | 50  | 50  | 55  |
| 53  | 67  | 68  | 59  | 75  | 58  | 92  | 81  | 92  | 68  |

|     |    |     |     |     |     |     |     |     |     |
|-----|----|-----|-----|-----|-----|-----|-----|-----|-----|
| 26  | 31 | 25  | 23  | 30  | 28  | 23  | 15  | 28  | 16  |
| 23  | 24 | 27  | 6   | 11  | 11  | 17  | 23  | 22  | 22  |
| 47  | 56 | 66  | 38  | 63  | 65  | 53  | 77  | 86  | 53  |
| 37  | 36 | 40  | 66  | 75  | 59  | 112 | 119 | 113 | 78  |
| 42  | 52 | 52  | 55  | 61  | 49  | 91  | 94  | 103 | 65  |
| 39  | 34 | 31  | 44  | 57  | 43  | 33  | 22  | 27  | 32  |
| 111 | 95 | 111 | 76  | 85  | 74  | 90  | 73  | 96  | 76  |
| 82  | 81 | 92  | 61  | 43  | 57  | 50  | 51  | 45  | 55  |
| 28  | 22 | 25  | 17  | 24  | 11  | 11  | 17  | 17  | 14  |
| 62  | 60 | 68  | 101 | 119 | 97  | 129 | 87  | 132 | 61  |
| 68  | 71 | 89  | 107 | 154 | 111 | 174 | 159 | 119 | 89  |
| 82  | 97 | 101 | 175 | 221 | 208 | 208 | 166 | 202 | 120 |
| 79  | 77 | 87  | 54  | 118 | 80  | 114 | 93  | 99  | 91  |
| 27  | 26 | 33  | 41  | 51  | 39  | 40  | 33  | 40  | 37  |
| 73  | 76 | 80  | 40  | 59  | 42  | 75  | 55  | 54  | 62  |
| 43  | 46 | 40  | 32  | 33  | 36  | 52  | 49  | 69  | 39  |
| 28  | 32 | 35  | 45  | 27  | 33  | 34  | 19  | 27  | 27  |
| 21  | 13 | 26  | 8   | 6   | 11  | 7   | 11  | 9   | 5   |
| 11  | 17 | 16  | 11  | 10  | 7   | 5   | 7   | 5   | 15  |
| 51  | 49 | 44  | 4   | 5   | 7   | 9   | 7   | 10  | 25  |
| 23  | 20 | 34  | 16  | 23  | 15  | 13  | 12  | 15  | 17  |
| 23  | 28 | 31  | 13  | 13  | 13  | 12  | 13  | 11  | 19  |
| 22  | 23 | 26  | 7   | 8   | 14  | 17  | 9   | 5   | 21  |
| 7   | 18 | 13  | 3   | 5   | 4   | 6   | 9   | 7   | 12  |
| 16  | 20 | 14  | 16  | 19  | 32  | 16  | 19  | 24  | 12  |
| 63  | 56 | 51  | 72  | 117 | 76  | 93  | 90  | 85  | 56  |
| 34  | 29 | 32  | 40  | 41  | 35  | 30  | 32  | 50  | 29  |
| 37  | 53 | 67  | 129 | 162 | 165 | 169 | 147 | 165 | 80  |
| 41  | 29 | 46  | 148 | 199 | 169 | 257 | 259 | 268 | 117 |
| 25  | 33 | 31  | 45  | 42  | 46  | 41  | 34  | 44  | 28  |
| 37  | 31 | 50  | 8   | 11  | 5   | 11  | 14  | 8   | 31  |
| 54  | 68 | 65  | 38  | 46  | 55  | 44  | 45  | 52  | 50  |
| 36  | 33 | 34  | 194 | 243 | 238 | 233 | 186 | 196 | 113 |
| 33  | 34 | 46  | 54  | 59  | 60  | 63  | 70  | 79  | 41  |
| 25  | 30 | 31  | 18  | 21  | 31  | 23  | 23  | 24  | 20  |
| 43  | 30 | 30  | 15  | 6   | 18  | 18  | 6   | 16  | 24  |
| 8   | 9  | 12  | 5   | 14  | 6   | 7   | 7   | 9   | 8   |
| 26  | 36 | 33  | 71  | 74  | 87  | 74  | 57  | 63  | 33  |
| 57  | 60 | 57  | 81  | 87  | 91  | 69  | 75  | 87  | 54  |
| 24  | 34 | 42  | 29  | 43  | 34  | 21  | 33  | 34  | 32  |
| 45  | 46 | 50  | 161 | 267 | 225 | 206 | 172 | 179 | 115 |

|    |    |    |     |     |     |     |     |     |    |
|----|----|----|-----|-----|-----|-----|-----|-----|----|
| 61 | 75 | 58 | 67  | 102 | 102 | 81  | 85  | 90  | 65 |
| 42 | 62 | 68 | 97  | 187 | 146 | 162 | 124 | 166 | 73 |
| 36 | 28 | 51 | 77  | 84  | 76  | 102 | 87  | 87  | 52 |
| 61 | 68 | 65 | 90  | 134 | 105 | 65  | 67  | 78  | 49 |
| 7  | 9  | 22 | 8   | 11  | 5   | 6   | 12  | 15  | 18 |
| 10 | 11 | 10 | 8   | 10  | 11  | 8   | 7   | 8   | 10 |
| 55 | 44 | 44 | 24  | 31  | 23  | 43  | 47  | 38  | 31 |
| 8  | 7  | 2  | 19  | 12  | 9   | 9   | 10  | 13  | 17 |
| 9  | 11 | 16 | 19  | 16  | 10  | 8   | 10  | 15  | 7  |
| 9  | 7  | 6  | 6   | 6   | 5   | 6   | 3   | 7   | 7  |
| 20 | 32 | 32 | 57  | 70  | 61  | 48  | 43  | 46  | 27 |
| 6  | 14 | 5  | 5   | 1   | 7   | 6   | 3   | 3   | 6  |
| 25 | 20 | 34 | 38  | 58  | 37  | 38  | 39  | 35  | 27 |
| 25 | 19 | 18 | 24  | 33  | 34  | 22  | 19  | 21  | 6  |
| 22 | 23 | 22 | 37  | 30  | 31  | 39  | 26  | 27  | 22 |
| 23 | 11 | 29 | 29  | 33  | 25  | 25  | 22  | 21  | 13 |
| 19 | 12 | 25 | 21  | 31  | 13  | 20  | 23  | 22  | 8  |
| 21 | 28 | 28 | 41  | 43  | 36  | 25  | 33  | 42  | 28 |
| 12 | 20 | 18 | 26  | 25  | 25  | 27  | 21  | 23  | 19 |
| 28 | 28 | 35 | 38  | 45  | 39  | 53  | 34  | 36  | 36 |
| 8  | 17 | 15 | 8   | 9   | 6   | 11  | 9   | 15  | 8  |
| 32 | 33 | 37 | 45  | 70  | 53  | 63  | 40  | 64  | 49 |
| 32 | 19 | 29 | 16  | 36  | 35  | 20  | 21  | 25  | 12 |
| 7  | 8  | 13 | 11  | 8   | 11  | 15  | 14  | 14  | 6  |
| 36 | 30 | 46 | 143 | 181 | 160 | 161 | 157 | 130 | 73 |
| 19 | 28 | 22 | 123 | 127 | 110 | 95  | 90  | 112 | 47 |
| 33 | 34 | 37 | 124 | 163 | 129 | 135 | 130 | 141 | 75 |
| 39 | 53 | 34 | 69  | 104 | 95  | 97  | 69  | 81  | 47 |
| 51 | 69 | 65 | 58  | 63  | 61  | 80  | 63  | 76  | 44 |
| 51 | 41 | 36 | 49  | 47  | 42  | 57  | 70  | 64  | 40 |
| 34 | 19 | 35 | 23  | 36  | 34  | 35  | 30  | 42  | 35 |
| 33 | 31 | 27 | 76  | 134 | 86  | 88  | 81  | 91  | 55 |
| 23 | 21 | 28 | 25  | 39  | 25  | 28  | 29  | 36  | 23 |
| 28 | 38 | 48 | 39  | 27  | 20  | 31  | 26  | 29  | 49 |
| 27 | 14 | 16 | 19  | 36  | 32  | 24  | 22  | 16  | 16 |
| 57 | 53 | 75 | 141 | 136 | 121 | 109 | 102 | 114 | 70 |
| 57 | 48 | 73 | 64  | 82  | 91  | 104 | 80  | 100 | 70 |
| 13 | 8  | 22 | 42  | 68  | 52  | 22  | 32  | 20  | 14 |
| 34 | 32 | 26 | 34  | 47  | 35  | 39  | 41  | 63  | 33 |
| 10 | 15 | 25 | 24  | 17  | 18  | 24  | 23  | 13  | 12 |
| 29 | 30 | 26 | 64  | 63  | 54  | 54  | 52  | 75  | 31 |

|    |    |    |     |     |     |     |     |     |     |
|----|----|----|-----|-----|-----|-----|-----|-----|-----|
| 20 | 27 | 28 | 75  | 89  | 57  | 53  | 48  | 57  | 31  |
| 37 | 36 | 52 | 68  | 75  | 88  | 71  | 61  | 77  | 50  |
| 60 | 58 | 47 | 138 | 155 | 130 | 146 | 129 | 153 | 71  |
| 32 | 35 | 32 | 109 | 126 | 150 | 133 | 126 | 155 | 74  |
| 68 | 47 | 52 | 121 | 162 | 112 | 74  | 112 | 62  | 40  |
| 27 | 29 | 36 | 66  | 73  | 62  | 70  | 70  | 81  | 37  |
| 30 | 24 | 17 | 77  | 133 | 80  | 79  | 89  | 82  | 48  |
| 45 | 49 | 50 | 39  | 69  | 50  | 51  | 43  | 53  | 46  |
| 42 | 56 | 54 | 19  | 20  | 25  | 30  | 23  | 27  | 47  |
| 56 | 50 | 70 | 53  | 66  | 64  | 51  | 71  | 64  | 52  |
| 53 | 51 | 64 | 216 | 268 | 233 | 255 | 214 | 256 | 129 |
| 35 | 38 | 41 | 24  | 27  | 17  | 30  | 28  | 18  | 32  |
| 39 | 30 | 51 | 127 | 188 | 119 | 130 | 125 | 137 | 55  |
| 14 | 16 | 9  | 18  | 15  | 10  | 16  | 8   | 6   | 16  |
| 34 | 24 | 25 | 40  | 33  | 39  | 31  | 31  | 39  | 30  |
| 13 | 16 | 26 | 32  | 51  | 53  | 68  | 48  | 55  | 25  |
| 29 | 33 | 43 | 88  | 128 | 87  | 114 | 103 | 113 | 41  |
| 38 | 35 | 36 | 46  | 52  | 42  | 32  | 33  | 40  | 30  |
| 39 | 27 | 36 | 36  | 33  | 27  | 41  | 39  | 32  | 21  |
| 51 | 46 | 59 | 36  | 49  | 32  | 59  | 42  | 53  | 37  |
| 24 | 31 | 25 | 42  | 46  | 54  | 70  | 74  | 41  | 41  |
| 18 | 28 | 29 | 58  | 54  | 57  | 41  | 40  | 42  | 26  |
| 36 | 38 | 36 | 50  | 80  | 60  | 78  | 56  | 44  | 46  |
| 60 | 54 | 67 | 214 | 281 | 225 | 270 | 249 | 282 | 133 |
| 41 | 41 | 44 | 62  | 82  | 61  | 74  | 72  | 67  | 38  |
| 30 | 26 | 40 | 116 | 146 | 111 | 95  | 72  | 96  | 35  |
| 13 | 9  | 12 | 49  | 105 | 69  | 63  | 43  | 48  | 24  |
| 44 | 43 | 52 | 80  | 98  | 71  | 93  | 65  | 96  | 72  |
| 51 | 53 | 41 | 18  | 34  | 36  | 33  | 48  | 36  | 32  |
| 3  | 5  | 1  | 7   | 10  | 5   | 5   | 4   | 6   | 3   |
| 51 | 64 | 39 | 68  | 84  | 70  | 84  | 83  | 89  | 55  |
| 35 | 51 | 40 | 148 | 156 | 150 | 158 | 139 | 165 | 101 |
| 53 | 36 | 60 | 65  | 85  | 60  | 68  | 54  | 63  | 40  |
| 35 | 47 | 39 | 112 | 140 | 117 | 113 | 92  | 91  | 80  |
| 27 | 36 | 36 | 51  | 49  | 50  | 46  | 43  | 36  | 40  |
| 54 | 38 | 50 | 86  | 124 | 106 | 107 | 93  | 122 | 52  |
| 50 | 62 | 70 | 109 | 146 | 128 | 121 | 110 | 139 | 82  |
| 20 | 28 | 27 | 2   | 8   | 7   | 11  | 3   | 14  | 15  |
| 23 | 32 | 35 | 71  | 86  | 66  | 66  | 74  | 74  | 40  |
| 23 | 19 | 22 | 37  | 36  | 43  | 44  | 29  | 39  | 18  |
| 25 | 28 | 43 | 62  | 77  | 76  | 66  | 59  | 67  | 44  |



|    |    |    |     |     |     |     |     |     |     |
|----|----|----|-----|-----|-----|-----|-----|-----|-----|
| 39 | 35 | 45 | 59  | 66  | 96  | 82  | 72  | 74  | 53  |
| 24 | 35 | 38 | 121 | 159 | 126 | 199 | 152 | 166 | 76  |
| 18 | 26 | 14 | 31  | 22  | 32  | 29  | 33  | 28  | 16  |
| 27 | 30 | 45 | 53  | 66  | 35  | 39  | 45  | 46  | 24  |
| 46 | 55 | 56 | 112 | 155 | 138 | 100 | 73  | 116 | 65  |
| 10 | 10 | 7  | 84  | 96  | 91  | 63  | 58  | 49  | 18  |
| 41 | 53 | 41 | 51  | 51  | 64  | 48  | 37  | 42  | 55  |
| 57 | 43 | 56 | 93  | 88  | 78  | 99  | 89  | 66  | 63  |
| 39 | 34 | 37 | 48  | 55  | 56  | 41  | 46  | 35  | 29  |
| 65 | 61 | 72 | 172 | 228 | 197 | 205 | 145 | 176 | 94  |
| 51 | 59 | 54 | 36  | 52  | 45  | 80  | 65  | 77  | 38  |
| 31 | 26 | 29 | 97  | 116 | 100 | 106 | 86  | 93  | 34  |
| 51 | 37 | 45 | 185 | 222 | 220 | 294 | 256 | 271 | 122 |
| 43 | 43 | 31 | 36  | 42  | 60  | 39  | 53  | 63  | 37  |
| 55 | 75 | 77 | 175 | 205 | 186 | 289 | 258 | 286 | 138 |
| 63 | 66 | 71 | 48  | 72  | 68  | 80  | 72  | 93  | 65  |
| 13 | 25 | 43 | 98  | 126 | 93  | 82  | 67  | 62  | 41  |
| 29 | 28 | 36 | 156 | 217 | 171 | 300 | 229 | 261 | 121 |
| 8  | 13 | 5  | 26  | 25  | 22  | 12  | 10  | 15  | 8   |
| 52 | 60 | 74 | 93  | 158 | 124 | 136 | 115 | 133 | 81  |
| 42 | 43 | 36 | 55  | 69  | 56  | 35  | 30  | 36  | 49  |
| 20 | 26 | 35 | 28  | 32  | 31  | 38  | 26  | 38  | 27  |
| 75 | 45 | 64 | 111 | 87  | 86  | 106 | 101 | 95  | 60  |
| 83 | 93 | 88 | 54  | 75  | 57  | 89  | 111 | 117 | 74  |
| 16 | 23 | 15 | 29  | 41  | 30  | 42  | 31  | 41  | 24  |
| 34 | 31 | 25 | 64  | 87  | 79  | 70  | 47  | 56  | 33  |
| 27 | 39 | 42 | 49  | 49  | 44  | 41  | 31  | 40  | 48  |
| 38 | 37 | 41 | 49  | 74  | 53  | 52  | 42  | 50  | 39  |
| 17 | 16 | 24 | 166 | 218 | 149 | 140 | 118 | 127 | 62  |
| 19 | 28 | 33 | 25  | 23  | 22  | 23  | 22  | 25  | 20  |
| 32 | 33 | 33 | 235 | 322 | 240 | 294 | 269 | 299 | 106 |
| 22 | 19 | 16 | 43  | 60  | 48  | 31  | 35  | 38  | 26  |
| 42 | 48 | 48 | 154 | 182 | 190 | 131 | 123 | 127 | 69  |
| 49 | 52 | 48 | 90  | 133 | 107 | 131 | 115 | 152 | 74  |
| 54 | 40 | 36 | 50  | 77  | 72  | 65  | 45  | 65  | 48  |
| 53 | 49 | 57 | 119 | 144 | 164 | 138 | 138 | 127 | 86  |
| 59 | 58 | 73 | 94  | 131 | 123 | 112 | 106 | 110 | 75  |
| 76 | 62 | 75 | 126 | 159 | 122 | 145 | 134 | 142 | 91  |
| 50 | 48 | 50 | 31  | 58  | 46  | 70  | 64  | 73  | 31  |
| 55 | 72 | 64 | 139 | 164 | 161 | 160 | 120 | 151 | 85  |
| 24 | 16 | 26 | 60  | 92  | 71  | 112 | 93  | 91  | 46  |

|     |     |     |     |     |     |     |     |     |     |
|-----|-----|-----|-----|-----|-----|-----|-----|-----|-----|
| 17  | 17  | 15  | 70  | 105 | 65  | 140 | 107 | 129 | 45  |
| 32  | 28  | 35  | 314 | 419 | 296 | 451 | 406 | 425 | 186 |
| 62  | 60  | 66  | 112 | 159 | 140 | 131 | 105 | 145 | 71  |
| 39  | 17  | 24  | 37  | 50  | 50  | 48  | 36  | 40  | 22  |
| 40  | 35  | 41  | 189 | 253 | 188 | 172 | 156 | 186 | 101 |
| 74  | 70  | 69  | 48  | 81  | 99  | 84  | 75  | 113 | 70  |
| 17  | 20  | 15  | 29  | 54  | 49  | 50  | 37  | 59  | 21  |
| 71  | 78  | 94  | 304 | 377 | 332 | 360 | 277 | 317 | 160 |
| 36  | 37  | 34  | 53  | 57  | 77  | 52  | 33  | 54  | 32  |
| 9   | 12  | 17  | 6   | 11  | 13  | 10  | 13  | 12  | 12  |
| 48  | 38  | 50  | 68  | 99  | 90  | 119 | 85  | 115 | 82  |
| 36  | 37  | 27  | 90  | 121 | 141 | 126 | 110 | 131 | 59  |
| 21  | 20  | 32  | 65  | 81  | 72  | 64  | 48  | 56  | 41  |
| 9   | 11  | 8   | 15  | 25  | 11  | 12  | 12  | 14  | 6   |
| 36  | 42  | 41  | 11  | 19  | 21  | 23  | 26  | 21  | 31  |
| 34  | 40  | 50  | 58  | 58  | 59  | 82  | 56  | 71  | 50  |
| 25  | 43  | 27  | 47  | 73  | 84  | 86  | 74  | 93  | 52  |
| 88  | 92  | 100 | 209 | 271 | 227 | 306 | 267 | 289 | 145 |
| 37  | 43  | 40  | 52  | 96  | 64  | 50  | 51  | 58  | 48  |
| 51  | 57  | 59  | 196 | 235 | 198 | 244 | 194 | 250 | 94  |
| 30  | 15  | 20  | 10  | 16  | 16  | 14  | 6   | 11  | 19  |
| 66  | 51  | 58  | 82  | 91  | 85  | 78  | 62  | 78  | 63  |
| 36  | 37  | 49  | 144 | 190 | 148 | 151 | 130 | 136 | 58  |
| 31  | 46  | 44  | 69  | 111 | 76  | 69  | 71  | 87  | 68  |
| 14  | 15  | 17  | 22  | 38  | 27  | 20  | 18  | 20  | 19  |
| 107 | 90  | 108 | 236 | 268 | 282 | 336 | 430 | 431 | 184 |
| 22  | 28  | 28  | 117 | 146 | 115 | 136 | 102 | 105 | 56  |
| 23  | 27  | 30  | 60  | 70  | 78  | 55  | 59  | 49  | 29  |
| 61  | 75  | 56  | 148 | 181 | 158 | 228 | 259 | 240 | 129 |
| 40  | 41  | 52  | 56  | 69  | 70  | 69  | 64  | 60  | 51  |
| 32  | 31  | 43  | 122 | 191 | 128 | 181 | 149 | 162 | 79  |
| 38  | 37  | 48  | 69  | 78  | 59  | 64  | 54  | 67  | 37  |
| 7   | 13  | 11  | 5   | 10  | 19  | 14  | 12  | 7   | 20  |
| 62  | 53  | 80  | 176 | 195 | 198 | 204 | 212 | 240 | 96  |
| 43  | 60  | 56  | 125 | 152 | 135 | 128 | 141 | 133 | 75  |
| 25  | 46  | 29  | 158 | 161 | 207 | 193 | 162 | 160 | 77  |
| 18  | 20  | 19  | 118 | 145 | 115 | 93  | 87  | 97  | 52  |
| 32  | 39  | 45  | 76  | 98  | 68  | 83  | 55  | 57  | 36  |
| 23  | 38  | 30  | 82  | 128 | 78  | 84  | 92  | 90  | 46  |
| 10  | 16  | 11  | 59  | 78  | 55  | 60  | 66  | 77  | 28  |
| 88  | 105 | 101 | 125 | 164 | 130 | 170 | 148 | 147 | 100 |

|     |     |     |     |     |     |     |     |     |     |
|-----|-----|-----|-----|-----|-----|-----|-----|-----|-----|
| 8   | 12  | 13  | 6   | 5   | 6   | 8   | 15  | 9   | 8   |
| 47  | 40  | 54  | 128 | 160 | 109 | 152 | 127 | 150 | 94  |
| 20  | 18  | 21  | 28  | 51  | 40  | 39  | 41  | 37  | 30  |
| 24  | 21  | 24  | 57  | 56  | 39  | 64  | 56  | 55  | 31  |
| 27  | 34  | 46  | 49  | 68  | 55  | 77  | 60  | 83  | 43  |
| 27  | 23  | 34  | 81  | 104 | 78  | 98  | 100 | 89  | 59  |
| 56  | 45  | 50  | 115 | 165 | 133 | 87  | 69  | 82  | 49  |
| 30  | 30  | 35  | 63  | 86  | 81  | 67  | 46  | 60  | 41  |
| 17  | 14  | 23  | 128 | 193 | 116 | 136 | 114 | 156 | 47  |
| 41  | 44  | 45  | 64  | 57  | 57  | 67  | 62  | 57  | 45  |
| 37  | 48  | 47  | 83  | 109 | 75  | 130 | 111 | 125 | 55  |
| 40  | 38  | 57  | 71  | 81  | 90  | 74  | 67  | 80  | 54  |
| 33  | 41  | 38  | 91  | 112 | 87  | 73  | 87  | 73  | 43  |
| 30  | 27  | 35  | 69  | 91  | 75  | 58  | 58  | 59  | 43  |
| 37  | 44  | 45  | 45  | 58  | 39  | 52  | 59  | 47  | 42  |
| 48  | 53  | 61  | 154 | 189 | 180 | 158 | 128 | 128 | 74  |
| 21  | 13  | 18  | 105 | 160 | 106 | 102 | 104 | 129 | 41  |
| 58  | 45  | 53  | 149 | 169 | 144 | 158 | 152 | 148 | 74  |
| 23  | 29  | 17  | 46  | 45  | 31  | 25  | 25  | 29  | 13  |
| 54  | 50  | 45  | 101 | 117 | 114 | 115 | 109 | 95  | 58  |
| 30  | 50  | 50  | 51  | 58  | 55  | 58  | 48  | 42  | 34  |
| 32  | 38  | 22  | 37  | 46  | 35  | 41  | 40  | 35  | 25  |
| 36  | 42  | 36  | 261 | 332 | 231 | 347 | 270 | 321 | 153 |
| 45  | 59  | 43  | 106 | 156 | 129 | 136 | 133 | 139 | 79  |
| 64  | 52  | 63  | 71  | 82  | 82  | 82  | 86  | 112 | 54  |
| 47  | 52  | 54  | 127 | 174 | 157 | 174 | 144 | 171 | 62  |
| 39  | 59  | 66  | 290 | 411 | 321 | 425 | 384 | 398 | 156 |
| 31  | 23  | 22  | 84  | 123 | 99  | 138 | 111 | 125 | 56  |
| 27  | 18  | 17  | 181 | 201 | 175 | 164 | 155 | 158 | 76  |
| 56  | 47  | 42  | 139 | 170 | 138 | 170 | 188 | 181 | 81  |
| 27  | 28  | 29  | 212 | 230 | 211 | 358 | 298 | 311 | 141 |
| 22  | 23  | 24  | 68  | 82  | 70  | 55  | 48  | 46  | 32  |
| 102 | 85  | 90  | 435 | 634 | 563 | 621 | 501 | 569 | 307 |
| 78  | 62  | 87  | 197 | 237 | 210 | 257 | 221 | 242 | 124 |
| 39  | 38  | 43  | 87  | 101 | 94  | 105 | 76  | 106 | 56  |
| 37  | 43  | 54  | 64  | 93  | 70  | 64  | 69  | 85  | 45  |
| 53  | 47  | 41  | 61  | 58  | 47  | 53  | 46  | 58  | 43  |
| 69  | 71  | 67  | 91  | 133 | 122 | 129 | 96  | 134 | 85  |
| 32  | 32  | 35  | 51  | 53  | 42  | 52  | 52  | 51  | 38  |
| 119 | 117 | 135 | 120 | 136 | 127 | 164 | 125 | 148 | 107 |
| 44  | 39  | 57  | 160 | 192 | 183 | 164 | 164 | 153 | 79  |

|    |    |    |     |     |     |     |     |     |     |
|----|----|----|-----|-----|-----|-----|-----|-----|-----|
| 33 | 42 | 38 | 252 | 363 | 295 | 257 | 283 | 262 | 113 |
| 67 | 52 | 82 | 167 | 189 | 171 | 239 | 232 | 194 | 139 |
| 35 | 31 | 41 | 62  | 85  | 67  | 77  | 71  | 56  | 42  |
| 21 | 17 | 25 | 62  | 71  | 58  | 72  | 42  | 56  | 31  |
| 27 | 19 | 35 | 67  | 94  | 64  | 67  | 62  | 77  | 34  |
| 48 | 42 | 52 | 131 | 186 | 141 | 132 | 121 | 138 | 71  |
| 74 | 68 | 75 | 87  | 136 | 119 | 173 | 194 | 184 | 85  |
| 57 | 65 | 62 | 78  | 107 | 84  | 108 | 74  | 93  | 78  |
| 52 | 59 | 55 | 88  | 104 | 112 | 115 | 80  | 96  | 75  |
| 56 | 45 | 58 | 118 | 181 | 139 | 178 | 167 | 202 | 93  |
| 86 | 82 | 94 | 55  | 82  | 70  | 74  | 82  | 95  | 78  |
| 52 | 46 | 51 | 211 | 310 | 216 | 262 | 220 | 296 | 105 |
| 12 | 11 | 20 | 29  | 42  | 24  | 10  | 11  | 20  | 9   |
| 14 | 10 | 15 | 9   | 10  | 6   | 11  | 10  | 8   | 10  |
| 48 | 36 | 34 | 32  | 47  | 35  | 46  | 30  | 36  | 27  |
| 16 | 18 | 30 | 71  | 93  | 60  | 41  | 30  | 45  | 12  |
| 53 | 35 | 45 | 51  | 58  | 50  | 53  | 65  | 77  | 43  |
| 18 | 28 | 29 | 31  | 56  | 51  | 43  | 40  | 46  | 40  |
| 25 | 22 | 30 | 168 | 238 | 179 | 136 | 102 | 124 | 63  |
| 56 | 62 | 54 | 246 | 285 | 258 | 297 | 284 | 293 | 123 |
| 48 | 58 | 39 | 279 | 344 | 289 | 328 | 236 | 321 | 144 |
| 27 | 29 | 34 | 70  | 76  | 82  | 83  | 57  | 75  | 56  |
| 28 | 36 | 29 | 50  | 74  | 60  | 72  | 62  | 67  | 45  |
| 31 | 48 | 55 | 94  | 114 | 77  | 115 | 99  | 91  | 46  |
| 60 | 49 | 64 | 114 | 126 | 119 | 159 | 136 | 175 | 86  |
| 63 | 56 | 68 | 291 | 392 | 296 | 373 | 297 | 324 | 159 |
| 33 | 26 | 33 | 190 | 279 | 225 | 179 | 159 | 161 | 61  |
| 33 | 35 | 43 | 54  | 77  | 48  | 62  | 54  | 61  | 44  |
| 59 | 56 | 60 | 269 | 416 | 369 | 473 | 406 | 428 | 208 |
| 28 | 31 | 31 | 91  | 86  | 86  | 103 | 90  | 98  | 57  |
| 32 | 24 | 42 | 46  | 59  | 33  | 46  | 50  | 54  | 17  |
| 20 | 21 | 27 | 35  | 60  | 47  | 52  | 46  | 56  | 31  |
| 25 | 26 | 26 | 11  | 19  | 9   | 16  | 20  | 16  | 21  |
| 52 | 53 | 50 | 189 | 210 | 201 | 199 | 170 | 209 | 87  |
| 13 | 16 | 13 | 12  | 11  | 19  | 18  | 17  | 27  | 25  |
| 24 | 27 | 27 | 37  | 39  | 26  | 44  | 28  | 39  | 38  |
| 33 | 25 | 30 | 69  | 91  | 76  | 94  | 82  | 94  | 38  |
| 29 | 42 | 45 | 43  | 51  | 54  | 46  | 39  | 55  | 42  |
| 51 | 64 | 74 | 30  | 53  | 45  | 48  | 40  | 64  | 58  |
| 16 | 15 | 13 | 45  | 46  | 42  | 23  | 25  | 21  | 10  |
| 17 | 26 | 31 | 14  | 19  | 17  | 14  | 15  | 15  | 25  |

|     |     |     |     |     |     |     |     |     |     |
|-----|-----|-----|-----|-----|-----|-----|-----|-----|-----|
| 81  | 77  | 83  | 215 | 253 | 224 | 394 | 389 | 424 | 190 |
| 31  | 44  | 44  | 91  | 106 | 83  | 106 | 115 | 123 | 56  |
| 56  | 54  | 47  | 58  | 79  | 72  | 90  | 98  | 110 | 65  |
| 65  | 73  | 62  | 237 | 301 | 284 | 490 | 457 | 512 | 221 |
| 39  | 44  | 33  | 90  | 127 | 86  | 65  | 55  | 59  | 31  |
| 29  | 25  | 28  | 42  | 43  | 57  | 60  | 42  | 52  | 42  |
| 68  | 67  | 82  | 199 | 255 | 239 | 226 | 223 | 231 | 121 |
| 32  | 21  | 30  | 110 | 135 | 101 | 87  | 66  | 68  | 38  |
| 47  | 48  | 53  | 159 | 180 | 204 | 256 | 263 | 293 | 107 |
| 53  | 57  | 49  | 85  | 155 | 117 | 196 | 174 | 180 | 100 |
| 42  | 59  | 59  | 143 | 239 | 219 | 237 | 206 | 217 | 104 |
| 79  | 81  | 74  | 103 | 100 | 111 | 97  | 107 | 109 | 65  |
| 51  | 55  | 46  | 131 | 145 | 136 | 124 | 115 | 123 | 68  |
| 52  | 45  | 56  | 24  | 37  | 28  | 26  | 22  | 38  | 50  |
| 15  | 10  | 19  | 28  | 47  | 45  | 22  | 32  | 23  | 15  |
| 17  | 25  | 31  | 64  | 87  | 74  | 84  | 51  | 70  | 24  |
| 33  | 47  | 51  | 29  | 58  | 54  | 36  | 33  | 49  | 43  |
| 115 | 117 | 144 | 88  | 102 | 123 | 135 | 105 | 120 | 131 |
| 39  | 52  | 46  | 83  | 120 | 126 | 157 | 170 | 140 | 78  |
| 27  | 17  | 17  | 54  | 63  | 46  | 43  | 39  | 53  | 13  |
| 45  | 55  | 61  | 209 | 256 | 210 | 303 | 272 | 288 | 143 |
| 32  | 22  | 30  | 30  | 38  | 41  | 36  | 40  | 54  | 35  |
| 34  | 32  | 29  | 309 | 416 | 320 | 593 | 496 | 572 | 301 |
| 82  | 80  | 97  | 94  | 138 | 142 | 121 | 103 | 123 | 96  |
| 17  | 40  | 29  | 149 | 160 | 134 | 196 | 154 | 146 | 94  |
| 34  | 35  | 41  | 37  | 76  | 45  | 42  | 35  | 42  | 42  |
| 35  | 35  | 49  | 30  | 36  | 32  | 38  | 29  | 32  | 43  |
| 27  | 32  | 26  | 159 | 217 | 149 | 134 | 112 | 138 | 67  |
| 61  | 60  | 61  | 88  | 129 | 86  | 77  | 84  | 93  | 61  |
| 37  | 59  | 49  | 100 | 149 | 116 | 159 | 131 | 142 | 75  |
| 56  | 70  | 86  | 141 | 181 | 163 | 151 | 130 | 171 | 92  |
| 35  | 29  | 31  | 178 | 238 | 225 | 246 | 230 | 274 | 136 |
| 24  | 25  | 23  | 86  | 99  | 89  | 81  | 64  | 102 | 43  |
| 28  | 27  | 31  | 113 | 151 | 128 | 127 | 127 | 151 | 66  |
| 69  | 75  | 105 | 73  | 114 | 101 | 125 | 117 | 125 | 84  |
| 61  | 53  | 70  | 335 | 422 | 376 | 589 | 511 | 578 | 248 |
| 28  | 32  | 38  | 34  | 41  | 45  | 67  | 41  | 57  | 52  |
| 31  | 29  | 43  | 369 | 464 | 444 | 419 | 362 | 451 | 211 |
| 38  | 38  | 36  | 284 | 413 | 309 | 337 | 286 | 348 | 115 |
| 56  | 58  | 61  | 69  | 121 | 104 | 108 | 86  | 106 | 64  |
| 36  | 31  | 32  | 160 | 227 | 200 | 212 | 203 | 203 | 79  |

|    |    |    |     |     |     |     |     |     |     |
|----|----|----|-----|-----|-----|-----|-----|-----|-----|
| 45 | 46 | 45 | 62  | 66  | 73  | 101 | 85  | 86  | 53  |
| 54 | 52 | 85 | 107 | 115 | 121 | 109 | 94  | 105 | 62  |
| 34 | 32 | 39 | 51  | 61  | 48  | 66  | 58  | 55  | 42  |
| 46 | 46 | 48 | 74  | 88  | 68  | 85  | 64  | 97  | 42  |
| 24 | 19 | 28 | 45  | 57  | 45  | 43  | 48  | 47  | 37  |
| 16 | 19 | 24 | 14  | 19  | 16  | 40  | 24  | 26  | 24  |
| 63 | 66 | 63 | 83  | 62  | 88  | 111 | 118 | 136 | 62  |
| 46 | 47 | 38 | 49  | 65  | 75  | 47  | 54  | 58  | 55  |
| 45 | 44 | 42 | 101 | 129 | 103 | 120 | 140 | 129 | 87  |
| 33 | 50 | 64 | 164 | 243 | 225 | 120 | 128 | 135 | 73  |
| 34 | 37 | 46 | 347 | 411 | 393 | 596 | 440 | 573 | 292 |
| 59 | 63 | 40 | 81  | 83  | 84  | 65  | 78  | 81  | 56  |
| 58 | 42 | 57 | 207 | 291 | 203 | 252 | 223 | 227 | 105 |
| 22 | 18 | 24 | 70  | 109 | 92  | 115 | 92  | 105 | 58  |
| 20 | 21 | 28 | 29  | 27  | 42  | 51  | 30  | 36  | 38  |
| 43 | 41 | 55 | 169 | 207 | 184 | 250 | 205 | 243 | 105 |
| 48 | 61 | 65 | 204 | 267 | 223 | 300 | 274 | 291 | 129 |
| 22 | 27 | 30 | 32  | 51  | 40  | 52  | 33  | 43  | 24  |
| 21 | 15 | 16 | 22  | 39  | 21  | 19  | 16  | 24  | 15  |
| 32 | 31 | 28 | 103 | 129 | 89  | 76  | 52  | 73  | 38  |
| 41 | 39 | 42 | 60  | 51  | 62  | 54  | 46  | 48  | 34  |
| 37 | 29 | 29 | 139 | 176 | 157 | 245 | 169 | 230 | 64  |
| 41 | 32 | 37 | 68  | 72  | 58  | 52  | 49  | 52  | 35  |
| 29 | 31 | 31 | 169 | 235 | 192 | 147 | 132 | 152 | 52  |
| 52 | 62 | 59 | 91  | 109 | 106 | 155 | 147 | 159 | 73  |
| 29 | 34 | 44 | 38  | 67  | 70  | 78  | 88  | 65  | 48  |
| 10 | 6  | 8  | 13  | 13  | 12  | 14  | 16  | 14  | 8   |
| 35 | 43 | 39 | 109 | 145 | 114 | 95  | 67  | 93  | 45  |
| 38 | 39 | 32 | 148 | 225 | 171 | 150 | 155 | 172 | 80  |
| 29 | 33 | 43 | 109 | 133 | 106 | 96  | 98  | 84  | 41  |
| 63 | 70 | 67 | 174 | 262 | 188 | 160 | 132 | 160 | 97  |
| 53 | 51 | 54 | 108 | 98  | 99  | 105 | 102 | 96  | 56  |
| 21 | 47 | 31 | 381 | 484 | 389 | 267 | 219 | 212 | 96  |
| 25 | 7  | 16 | 28  | 33  | 28  | 10  | 6   | 17  | 18  |
| 49 | 39 | 49 | 314 | 469 | 410 | 632 | 574 | 695 | 332 |
| 33 | 26 | 36 | 40  | 68  | 71  | 44  | 44  | 50  | 46  |
| 34 | 20 | 30 | 273 | 388 | 328 | 393 | 359 | 368 | 194 |
| 15 | 15 | 19 | 11  | 20  | 22  | 11  | 19  | 11  | 16  |
| 15 | 20 | 19 | 30  | 26  | 34  | 30  | 34  | 28  | 19  |
| 17 | 15 | 24 | 75  | 118 | 70  | 84  | 64  | 85  | 38  |
| 66 | 70 | 84 | 169 | 246 | 219 | 271 | 275 | 281 | 139 |

|     |     |     |     |     |     |     |     |     |     |
|-----|-----|-----|-----|-----|-----|-----|-----|-----|-----|
| 62  | 78  | 89  | 462 | 533 | 479 | 645 | 553 | 600 | 310 |
| 44  | 47  | 43  | 106 | 119 | 127 | 149 | 153 | 116 | 67  |
| 33  | 29  | 27  | 347 | 431 | 334 | 424 | 355 | 394 | 156 |
| 67  | 92  | 83  | 227 | 288 | 251 | 465 | 400 | 414 | 209 |
| 24  | 20  | 14  | 55  | 56  | 50  | 38  | 28  | 46  | 30  |
| 45  | 44  | 41  | 146 | 187 | 134 | 160 | 137 | 154 | 68  |
| 107 | 96  | 90  | 174 | 221 | 189 | 244 | 195 | 234 | 122 |
| 46  | 53  | 39  | 71  | 101 | 98  | 94  | 88  | 75  | 59  |
| 11  | 16  | 23  | 89  | 162 | 92  | 89  | 92  | 86  | 38  |
| 34  | 26  | 26  | 35  | 59  | 51  | 50  | 44  | 47  | 29  |
| 55  | 80  | 56  | 261 | 301 | 265 | 294 | 274 | 296 | 118 |
| 60  | 54  | 70  | 88  | 98  | 83  | 117 | 100 | 104 | 76  |
| 64  | 54  | 60  | 177 | 283 | 243 | 266 | 228 | 254 | 124 |
| 62  | 63  | 63  | 256 | 356 | 333 | 234 | 197 | 214 | 91  |
| 39  | 44  | 35  | 57  | 84  | 66  | 65  | 59  | 73  | 51  |
| 80  | 98  | 104 | 657 | 891 | 669 | 740 | 707 | 822 | 333 |
| 35  | 42  | 48  | 147 | 221 | 170 | 213 | 161 | 181 | 84  |
| 30  | 29  | 37  | 107 | 134 | 126 | 130 | 122 | 121 | 58  |
| 16  | 16  | 20  | 92  | 97  | 84  | 65  | 54  | 78  | 29  |
| 51  | 79  | 62  | 97  | 117 | 102 | 129 | 128 | 127 | 75  |
| 1   | 6   | 7   | 125 | 205 | 138 | 105 | 69  | 88  | 47  |
| 23  | 20  | 30  | 73  | 110 | 73  | 128 | 97  | 99  | 52  |
| 13  | 16  | 15  | 62  | 77  | 60  | 27  | 16  | 30  | 20  |
| 36  | 35  | 34  | 116 | 138 | 132 | 84  | 92  | 110 | 58  |
| 32  | 43  | 50  | 147 | 207 | 147 | 192 | 178 | 172 | 66  |
| 39  | 37  | 40  | 81  | 105 | 90  | 64  | 61  | 65  | 50  |
| 54  | 39  | 43  | 108 | 126 | 118 | 84  | 98  | 89  | 50  |
| 128 | 129 | 153 | 198 | 244 | 199 | 296 | 280 | 282 | 164 |
| 49  | 56  | 68  | 116 | 128 | 149 | 167 | 155 | 137 | 74  |
| 33  | 28  | 29  | 299 | 407 | 316 | 345 | 305 | 377 | 163 |
| 19  | 21  | 19  | 25  | 43  | 25  | 27  | 20  | 29  | 16  |
| 30  | 27  | 31  | 105 | 109 | 96  | 123 | 119 | 110 | 52  |
| 25  | 30  | 24  | 38  | 52  | 47  | 39  | 40  | 36  | 31  |
| 22  | 34  | 29  | 88  | 108 | 71  | 60  | 49  | 48  | 35  |
| 42  | 38  | 40  | 120 | 179 | 154 | 123 | 110 | 129 | 67  |
| 37  | 52  | 40  | 83  | 127 | 98  | 107 | 105 | 122 | 61  |
| 18  | 26  | 30  | 27  | 29  | 26  | 25  | 28  | 27  | 24  |
| 74  | 63  | 71  | 117 | 150 | 159 | 171 | 140 | 181 | 87  |
| 21  | 28  | 26  | 91  | 118 | 101 | 93  | 69  | 71  | 34  |
| 49  | 58  | 54  | 67  | 73  | 61  | 62  | 59  | 59  | 49  |
| 49  | 51  | 48  | 281 | 356 | 314 | 409 | 339 | 396 | 189 |

|    |    |     |     |     |     |     |     |     |     |
|----|----|-----|-----|-----|-----|-----|-----|-----|-----|
| 18 | 33 | 21  | 24  | 24  | 79  | 63  | 82  | 62  | 54  |
| 32 | 28 | 33  | 43  | 63  | 43  | 47  | 47  | 55  | 31  |
| 22 | 33 | 26  | 52  | 58  | 56  | 44  | 47  | 38  | 27  |
| 50 | 55 | 55  | 139 | 162 | 133 | 120 | 137 | 142 | 62  |
| 28 | 34 | 46  | 32  | 47  | 29  | 36  | 24  | 23  | 38  |
| 42 | 36 | 42  | 38  | 54  | 62  | 39  | 42  | 44  | 36  |
| 54 | 58 | 63  | 76  | 81  | 78  | 91  | 103 | 100 | 78  |
| 25 | 24 | 27  | 172 | 208 | 169 | 128 | 120 | 130 | 51  |
| 22 | 19 | 27  | 23  | 29  | 31  | 32  | 33  | 47  | 26  |
| 48 | 47 | 47  | 226 | 276 | 230 | 296 | 271 | 283 | 150 |
| 19 | 22 | 29  | 55  | 52  | 48  | 29  | 30  | 41  | 28  |
| 7  | 4  | 6   | 7   | 3   | 4   | 1   | 1   | 7   | 2   |
| 40 | 44 | 48  | 341 | 424 | 358 | 514 | 435 | 512 | 227 |
| 22 | 22 | 18  | 49  | 55  | 43  | 37  | 42  | 42  | 25  |
| 11 | 11 | 11  | 12  | 13  | 15  | 20  | 25  | 11  | 12  |
| 24 | 28 | 31  | 31  | 49  | 46  | 63  | 53  | 51  | 31  |
| 44 | 55 | 55  | 297 | 345 | 320 | 384 | 377 | 358 | 190 |
| 96 | 95 | 100 | 103 | 122 | 114 | 117 | 127 | 139 | 107 |
| 34 | 31 | 34  | 26  | 23  | 31  | 31  | 39  | 42  | 37  |
| 48 | 53 | 57  | 93  | 135 | 119 | 142 | 130 | 141 | 78  |
| 36 | 31 | 29  | 63  | 107 | 86  | 108 | 99  | 104 | 64  |
| 70 | 67 | 56  | 146 | 153 | 109 | 137 | 112 | 116 | 61  |
| 51 | 62 | 57  | 80  | 97  | 94  | 79  | 83  | 90  | 67  |
| 30 | 31 | 44  | 49  | 56  | 62  | 26  | 36  | 42  | 27  |
| 31 | 35 | 50  | 134 | 151 | 118 | 127 | 126 | 122 | 57  |
| 34 | 54 | 37  | 63  | 72  | 115 | 75  | 69  | 69  | 56  |
| 29 | 34 | 33  | 116 | 189 | 136 | 206 | 178 | 160 | 74  |
| 28 | 21 | 23  | 106 | 188 | 152 | 159 | 128 | 148 | 84  |
| 49 | 40 | 33  | 90  | 104 | 89  | 114 | 85  | 105 | 54  |
| 55 | 52 | 54  | 86  | 127 | 110 | 158 | 118 | 184 | 72  |
| 41 | 49 | 53  | 294 | 372 | 291 | 241 | 206 | 244 | 96  |
| 30 | 28 | 37  | 366 | 376 | 394 | 432 | 340 | 425 | 169 |
| 56 | 54 | 58  | 109 | 150 | 138 | 181 | 156 | 215 | 109 |
| 56 | 41 | 68  | 214 | 278 | 248 | 238 | 218 | 290 | 142 |
| 68 | 53 | 62  | 310 | 379 | 306 | 375 | 339 | 410 | 182 |
| 29 | 22 | 18  | 38  | 55  | 64  | 52  | 51  | 64  | 38  |
| 75 | 55 | 78  | 46  | 60  | 41  | 71  | 69  | 73  | 61  |
| 24 | 30 | 32  | 24  | 27  | 31  | 42  | 28  | 27  | 27  |
| 9  | 8  | 5   | 24  | 17  | 9   | 25  | 24  | 20  | 8   |
| 70 | 68 | 77  | 37  | 57  | 33  | 46  | 40  | 52  | 35  |
| 49 | 45 | 71  | 127 | 177 | 156 | 166 | 112 | 150 | 82  |



|     |     |     |     |     |     |     |     |     |     |
|-----|-----|-----|-----|-----|-----|-----|-----|-----|-----|
| 21  | 22  | 34  | 40  | 40  | 38  | 31  | 34  | 36  | 23  |
| 23  | 37  | 49  | 57  | 77  | 74  | 55  | 67  | 82  | 50  |
| 35  | 23  | 33  | 48  | 81  | 65  | 74  | 72  | 90  | 40  |
| 33  | 37  | 33  | 90  | 120 | 106 | 93  | 80  | 90  | 47  |
| 36  | 39  | 44  | 63  | 61  | 52  | 48  | 58  | 60  | 37  |
| 57  | 71  | 64  | 188 | 283 | 227 | 226 | 185 | 227 | 93  |
| 37  | 30  | 38  | 105 | 142 | 119 | 124 | 107 | 101 | 42  |
| 29  | 31  | 31  | 86  | 71  | 72  | 60  | 60  | 70  | 52  |
| 33  | 36  | 42  | 43  | 57  | 59  | 54  | 72  | 68  | 34  |
| 40  | 39  | 46  | 52  | 75  | 57  | 54  | 60  | 68  | 45  |
| 64  | 65  | 64  | 103 | 110 | 118 | 140 | 108 | 113 | 86  |
| 33  | 35  | 45  | 36  | 50  | 44  | 35  | 37  | 36  | 34  |
| 27  | 28  | 35  | 49  | 46  | 39  | 52  | 47  | 50  | 28  |
| 33  | 44  | 41  | 90  | 132 | 93  | 65  | 68  | 68  | 51  |
| 35  | 41  | 45  | 78  | 101 | 87  | 88  | 95  | 100 | 55  |
| 45  | 46  | 42  | 194 | 263 | 227 | 220 | 218 | 255 | 102 |
| 53  | 50  | 66  | 97  | 139 | 104 | 93  | 72  | 83  | 69  |
| 36  | 36  | 38  | 89  | 115 | 104 | 94  | 104 | 81  | 47  |
| 31  | 38  | 44  | 200 | 264 | 213 | 250 | 219 | 237 | 98  |
| 25  | 20  | 34  | 86  | 116 | 114 | 79  | 85  | 85  | 47  |
| 39  | 48  | 36  | 66  | 92  | 71  | 67  | 44  | 54  | 40  |
| 66  | 60  | 63  | 255 | 323 | 259 | 300 | 268 | 249 | 130 |
| 18  | 13  | 12  | 49  | 71  | 61  | 39  | 38  | 49  | 23  |
| 43  | 50  | 50  | 91  | 112 | 91  | 115 | 108 | 117 | 63  |
| 29  | 66  | 59  | 70  | 53  | 82  | 112 | 104 | 112 | 78  |
| 14  | 11  | 20  | 43  | 57  | 28  | 33  | 29  | 38  | 15  |
| 24  | 43  | 44  | 71  | 64  | 59  | 61  | 62  | 46  | 46  |
| 34  | 33  | 47  | 143 | 215 | 193 | 243 | 187 | 248 | 105 |
| 29  | 17  | 20  | 100 | 150 | 128 | 210 | 147 | 178 | 81  |
| 28  | 23  | 36  | 216 | 279 | 219 | 333 | 276 | 366 | 155 |
| 79  | 103 | 91  | 108 | 125 | 139 | 250 | 251 | 209 | 150 |
| 57  | 88  | 79  | 128 | 145 | 130 | 152 | 161 | 153 | 94  |
| 29  | 37  | 51  | 73  | 119 | 81  | 83  | 76  | 78  | 33  |
| 40  | 44  | 44  | 207 | 279 | 223 | 193 | 161 | 182 | 94  |
| 123 | 137 | 146 | 115 | 172 | 148 | 162 | 129 | 148 | 157 |
| 35  | 46  | 52  | 69  | 78  | 88  | 88  | 71  | 75  | 53  |
| 11  | 25  | 22  | 37  | 69  | 27  | 38  | 38  | 46  | 29  |
| 11  | 12  | 13  | 12  | 30  | 16  | 20  | 13  | 27  | 9   |
| 47  | 41  | 39  | 49  | 70  | 57  | 63  | 62  | 74  | 42  |
| 35  | 43  | 53  | 83  | 98  | 82  | 110 | 101 | 86  | 59  |
| 75  | 73  | 83  | 189 | 219 | 226 | 231 | 191 | 211 | 115 |

|     |    |    |     |     |     |     |     |     |     |
|-----|----|----|-----|-----|-----|-----|-----|-----|-----|
| 21  | 26 | 28 | 24  | 36  | 33  | 31  | 33  | 23  | 28  |
| 38  | 36 | 45 | 67  | 100 | 62  | 92  | 84  | 85  | 61  |
| 29  | 28 | 34 | 39  | 45  | 30  | 30  | 48  | 44  | 34  |
| 59  | 52 | 56 | 115 | 117 | 104 | 93  | 108 | 101 | 70  |
| 26  | 37 | 46 | 135 | 171 | 130 | 144 | 122 | 122 | 53  |
| 25  | 29 | 32 | 183 | 241 | 197 | 157 | 132 | 131 | 70  |
| 38  | 54 | 45 | 129 | 146 | 113 | 108 | 99  | 96  | 50  |
| 73  | 99 | 83 | 170 | 235 | 228 | 270 | 216 | 243 | 130 |
| 37  | 44 | 54 | 113 | 145 | 148 | 129 | 116 | 114 | 56  |
| 26  | 22 | 47 | 60  | 79  | 74  | 50  | 54  | 60  | 34  |
| 63  | 59 | 94 | 584 | 678 | 566 | 816 | 714 | 765 | 345 |
| 24  | 33 | 30 | 52  | 77  | 60  | 38  | 56  | 49  | 32  |
| 21  | 23 | 32 | 54  | 71  | 54  | 51  | 49  | 56  | 35  |
| 18  | 15 | 16 | 55  | 56  | 51  | 67  | 57  | 68  | 30  |
| 20  | 23 | 29 | 28  | 32  | 22  | 18  | 19  | 20  | 20  |
| 49  | 54 | 50 | 100 | 101 | 123 | 70  | 56  | 90  | 49  |
| 52  | 59 | 74 | 51  | 65  | 63  | 62  | 52  | 65  | 50  |
| 18  | 17 | 20 | 40  | 46  | 53  | 54  | 53  | 39  | 25  |
| 41  | 58 | 42 | 91  | 109 | 86  | 72  | 69  | 70  | 50  |
| 55  | 61 | 60 | 207 | 236 | 185 | 231 | 233 | 245 | 105 |
| 14  | 17 | 11 | 28  | 43  | 24  | 30  | 31  | 32  | 16  |
| 43  | 39 | 43 | 70  | 92  | 74  | 59  | 61  | 68  | 46  |
| 43  | 52 | 53 | 133 | 134 | 122 | 90  | 92  | 119 | 64  |
| 14  | 21 | 33 | 23  | 31  | 18  | 30  | 23  | 26  | 24  |
| 32  | 25 | 35 | 38  | 48  | 51  | 43  | 33  | 40  | 28  |
| 38  | 35 | 50 | 164 | 191 | 189 | 117 | 126 | 119 | 51  |
| 17  | 20 | 17 | 16  | 26  | 20  | 26  | 28  | 39  | 8   |
| 101 | 93 | 90 | 114 | 155 | 137 | 136 | 116 | 126 | 96  |
| 24  | 29 | 21 | 40  | 66  | 56  | 48  | 43  | 52  | 39  |
| 63  | 50 | 44 | 241 | 310 | 283 | 235 | 203 | 209 | 107 |
| 55  | 63 | 75 | 122 | 158 | 158 | 178 | 161 | 209 | 94  |
| 37  | 41 | 47 | 43  | 73  | 58  | 61  | 73  | 67  | 41  |
| 40  | 50 | 58 | 214 | 301 | 232 | 340 | 301 | 312 | 171 |
| 76  | 92 | 97 | 63  | 70  | 61  | 63  | 72  | 74  | 66  |
| 25  | 13 | 13 | 33  | 44  | 25  | 52  | 49  | 44  | 20  |
| 22  | 16 | 21 | 35  | 46  | 47  | 38  | 31  | 26  | 30  |
| 19  | 34 | 25 | 262 | 302 | 292 | 242 | 243 | 232 | 88  |
| 22  | 23 | 31 | 114 | 163 | 140 | 123 | 87  | 95  | 45  |
| 40  | 42 | 47 | 84  | 116 | 101 | 69  | 83  | 61  | 68  |
| 61  | 47 | 64 | 47  | 62  | 52  | 72  | 70  | 91  | 55  |
| 29  | 31 | 32 | 103 | 121 | 105 | 74  | 63  | 80  | 52  |

|     |     |     |     |     |     |     |     |     |     |
|-----|-----|-----|-----|-----|-----|-----|-----|-----|-----|
| 34  | 40  | 45  | 67  | 87  | 88  | 82  | 85  | 78  | 61  |
| 53  | 45  | 49  | 43  | 53  | 35  | 50  | 28  | 58  | 46  |
| 88  | 77  | 89  | 255 | 280 | 262 | 200 | 204 | 181 | 113 |
| 22  | 21  | 17  | 38  | 47  | 37  | 50  | 32  | 34  | 28  |
| 103 | 84  | 121 | 194 | 206 | 179 | 349 | 382 | 452 | 190 |
| 23  | 25  | 38  | 61  | 65  | 65  | 57  | 54  | 65  | 37  |
| 27  | 25  | 23  | 38  | 52  | 48  | 31  | 29  | 39  | 24  |
| 19  | 23  | 30  | 118 | 177 | 193 | 153 | 111 | 148 | 79  |
| 30  | 27  | 32  | 16  | 37  | 24  | 28  | 29  | 40  | 24  |
| 28  | 30  | 37  | 84  | 102 | 104 | 73  | 62  | 73  | 26  |
| 56  | 55  | 68  | 103 | 102 | 96  | 94  | 86  | 89  | 61  |
| 35  | 39  | 34  | 39  | 47  | 39  | 56  | 39  | 45  | 37  |
| 67  | 50  | 60  | 208 | 287 | 256 | 276 | 263 | 247 | 115 |
| 51  | 50  | 53  | 51  | 60  | 45  | 59  | 52  | 57  | 58  |
| 38  | 25  | 32  | 47  | 72  | 57  | 39  | 30  | 35  | 37  |
| 19  | 33  | 28  | 34  | 25  | 35  | 22  | 29  | 23  | 28  |
| 24  | 35  | 32  | 60  | 59  | 55  | 46  | 38  | 30  | 26  |
| 48  | 54  | 50  | 61  | 64  | 70  | 60  | 43  | 50  | 55  |
| 30  | 21  | 24  | 11  | 16  | 20  | 23  | 27  | 18  | 18  |
| 56  | 59  | 64  | 109 | 129 | 104 | 128 | 127 | 122 | 82  |
| 57  | 70  | 68  | 79  | 114 | 102 | 105 | 93  | 115 | 67  |
| 42  | 37  | 57  | 253 | 322 | 296 | 399 | 337 | 354 | 186 |
| 40  | 38  | 54  | 95  | 78  | 86  | 88  | 114 | 111 | 66  |
| 96  | 124 | 111 | 145 | 165 | 151 | 185 | 170 | 199 | 92  |
| 47  | 31  | 44  | 47  | 62  | 38  | 51  | 37  | 49  | 44  |
| 5   | 5   | 9   | 15  | 21  | 12  | 10  | 9   | 9   | 12  |
| 47  | 46  | 43  | 83  | 94  | 91  | 107 | 109 | 112 | 81  |
| 53  | 48  | 48  | 124 | 140 | 139 | 127 | 98  | 122 | 58  |
| 13  | 19  | 30  | 42  | 50  | 46  | 44  | 37  | 54  | 26  |
| 23  | 17  | 13  | 159 | 218 | 166 | 102 | 113 | 121 | 52  |
| 18  | 19  | 16  | 124 | 122 | 126 | 83  | 72  | 85  | 50  |
| 21  | 34  | 28  | 21  | 15  | 38  | 31  | 35  | 28  | 29  |
| 9   | 22  | 15  | 23  | 28  | 27  | 51  | 53  | 50  | 21  |
| 48  | 46  | 51  | 116 | 142 | 138 | 83  | 95  | 82  | 57  |
| 16  | 17  | 14  | 25  | 23  | 26  | 36  | 22  | 29  | 24  |
| 60  | 44  | 66  | 176 | 231 | 230 | 249 | 216 | 233 | 85  |
| 56  | 58  | 60  | 159 | 182 | 164 | 227 | 182 | 185 | 87  |
| 37  | 46  | 52  | 143 | 174 | 170 | 111 | 122 | 100 | 76  |
| 50  | 51  | 55  | 16  | 43  | 27  | 42  | 40  | 33  | 46  |
| 23  | 24  | 36  | 48  | 62  | 47  | 89  | 65  | 102 | 40  |
| 47  | 33  | 32  | 62  | 70  | 71  | 62  | 57  | 74  | 40  |

|    |    |    |     |     |     |     |     |     |     |
|----|----|----|-----|-----|-----|-----|-----|-----|-----|
| 22 | 31 | 49 | 33  | 50  | 36  | 35  | 30  | 41  | 29  |
| 15 | 9  | 14 | 22  | 33  | 29  | 28  | 29  | 26  | 21  |
| 40 | 39 | 49 | 179 | 242 | 182 | 239 | 209 | 235 | 119 |
| 64 | 57 | 64 | 134 | 192 | 132 | 119 | 128 | 132 | 75  |
| 26 | 32 | 33 | 31  | 32  | 35  | 30  | 25  | 38  | 15  |
| 74 | 55 | 62 | 98  | 104 | 85  | 115 | 112 | 107 | 89  |
| 47 | 66 | 72 | 56  | 60  | 52  | 47  | 54  | 43  | 62  |
| 33 | 50 | 53 | 139 | 180 | 136 | 221 | 207 | 206 | 103 |
| 10 | 16 | 12 | 24  | 29  | 20  | 30  | 24  | 25  | 21  |
| 71 | 49 | 53 | 192 | 222 | 206 | 201 | 185 | 192 | 100 |
| 42 | 52 | 56 | 66  | 83  | 95  | 97  | 102 | 92  | 61  |
| 42 | 47 | 65 | 74  | 83  | 75  | 78  | 87  | 87  | 62  |
| 37 | 35 | 59 | 420 | 574 | 447 | 672 | 514 | 596 | 296 |
| 28 | 55 | 55 | 61  | 88  | 75  | 84  | 68  | 71  | 58  |
| 20 | 17 | 18 | 39  | 38  | 26  | 23  | 51  | 40  | 35  |
| 27 | 27 | 30 | 61  | 63  | 56  | 80  | 82  | 91  | 34  |
| 39 | 31 | 25 | 71  | 73  | 65  | 80  | 59  | 67  | 38  |
| 28 | 28 | 20 | 147 | 188 | 164 | 208 | 179 | 178 | 82  |
| 89 | 66 | 78 | 248 | 333 | 288 | 312 | 272 | 304 | 131 |
| 31 | 32 | 49 | 58  | 92  | 81  | 65  | 67  | 71  | 43  |
| 68 | 75 | 91 | 619 | 857 | 678 | 938 | 824 | 955 | 511 |
| 34 | 31 | 44 | 210 | 282 | 239 | 255 | 209 | 222 | 108 |
| 36 | 40 | 27 | 60  | 57  | 45  | 54  | 46  | 53  | 40  |
| 39 | 43 | 27 | 56  | 62  | 61  | 90  | 77  | 78  | 37  |
| 23 | 22 | 32 | 24  | 31  | 23  | 20  | 28  | 20  | 17  |
| 41 | 50 | 59 | 201 | 275 | 208 | 361 | 300 | 328 | 151 |
| 21 | 35 | 25 | 108 | 168 | 123 | 107 | 102 | 102 | 54  |
| 25 | 37 | 39 | 130 | 162 | 133 | 88  | 93  | 96  | 62  |
| 18 | 19 | 13 | 19  | 36  | 37  | 37  | 23  | 30  | 23  |
| 61 | 58 | 56 | 22  | 27  | 20  | 42  | 47  | 52  | 37  |
| 21 | 31 | 35 | 46  | 49  | 49  | 53  | 29  | 46  | 22  |
| 50 | 50 | 47 | 160 | 182 | 183 | 249 | 230 | 247 | 104 |
| 23 | 28 | 36 | 118 | 129 | 125 | 89  | 100 | 112 | 49  |
| 38 | 38 | 42 | 113 | 166 | 126 | 121 | 124 | 158 | 61  |
| 23 | 35 | 37 | 150 | 206 | 151 | 157 | 143 | 155 | 57  |
| 30 | 22 | 23 | 46  | 61  | 42  | 40  | 52  | 41  | 28  |
| 42 | 57 | 52 | 185 | 201 | 190 | 261 | 225 | 254 | 106 |
| 73 | 51 | 52 | 219 | 284 | 252 | 238 | 213 | 258 | 118 |
| 53 | 60 | 50 | 95  | 115 | 85  | 107 | 94  | 87  | 51  |
| 47 | 43 | 48 | 90  | 138 | 117 | 139 | 104 | 106 | 54  |
| 86 | 94 | 98 | 146 | 135 | 127 | 181 | 161 | 174 | 99  |

|    |    |    |     |     |     |     |     |     |     |
|----|----|----|-----|-----|-----|-----|-----|-----|-----|
| 24 | 23 | 29 | 182 | 239 | 160 | 249 | 190 | 215 | 68  |
| 36 | 45 | 32 | 82  | 109 | 94  | 72  | 78  | 74  | 55  |
| 63 | 54 | 68 | 521 | 603 | 519 | 746 | 591 | 653 | 330 |
| 22 | 26 | 39 | 119 | 145 | 113 | 109 | 98  | 132 | 59  |
| 18 | 29 | 34 | 87  | 149 | 112 | 159 | 123 | 174 | 67  |
| 44 | 42 | 62 | 106 | 154 | 130 | 138 | 113 | 117 | 63  |
| 31 | 40 | 44 | 82  | 132 | 116 | 97  | 86  | 92  | 56  |
| 38 | 31 | 42 | 117 | 187 | 128 | 157 | 134 | 151 | 62  |
| 52 | 44 | 54 | 56  | 99  | 98  | 77  | 73  | 81  | 53  |
| 18 | 24 | 29 | 24  | 26  | 15  | 31  | 22  | 23  | 16  |
| 41 | 44 | 51 | 165 | 174 | 140 | 205 | 195 | 204 | 94  |
| 23 | 19 | 20 | 34  | 34  | 37  | 25  | 18  | 24  | 29  |
| 44 | 35 | 43 | 58  | 60  | 64  | 63  | 69  | 78  | 39  |
| 34 | 23 | 41 | 320 | 347 | 327 | 256 | 239 | 265 | 94  |
| 36 | 31 | 52 | 50  | 56  | 70  | 70  | 54  | 59  | 31  |
| 27 | 21 | 28 | 45  | 55  | 63  | 70  | 56  | 61  | 30  |
| 43 | 41 | 30 | 94  | 118 | 97  | 120 | 88  | 94  | 54  |
| 36 | 48 | 49 | 204 | 279 | 216 | 169 | 156 | 167 | 81  |
| 78 | 72 | 69 | 161 | 241 | 199 | 325 | 237 | 285 | 139 |
| 59 | 55 | 57 | 105 | 144 | 111 | 107 | 104 | 75  | 61  |
| 48 | 41 | 48 | 67  | 80  | 69  | 68  | 82  | 55  | 53  |
| 36 | 47 | 45 | 40  | 40  | 33  | 29  | 35  | 45  | 40  |
| 49 | 47 | 64 | 90  | 120 | 126 | 142 | 150 | 156 | 83  |
| 45 | 36 | 67 | 187 | 227 | 188 | 253 | 215 | 278 | 113 |
| 6  | 9  | 10 | 41  | 36  | 40  | 27  | 20  | 18  | 11  |
| 27 | 30 | 29 | 27  | 31  | 40  | 34  | 30  | 38  | 31  |
| 36 | 30 | 43 | 53  | 91  | 76  | 67  | 49  | 55  | 39  |
| 36 | 22 | 33 | 44  | 75  | 48  | 52  | 55  | 51  | 44  |
| 61 | 69 | 54 | 190 | 289 | 218 | 182 | 173 | 182 | 109 |
| 27 | 27 | 45 | 56  | 90  | 76  | 60  | 57  | 71  | 22  |
| 48 | 45 | 42 | 52  | 67  | 68  | 47  | 51  | 65  | 47  |
| 57 | 57 | 57 | 152 | 201 | 169 | 184 | 211 | 214 | 97  |
| 19 | 30 | 22 | 63  | 63  | 65  | 53  | 48  | 48  | 40  |
| 59 | 45 | 60 | 154 | 272 | 230 | 290 | 234 | 264 | 133 |
| 38 | 36 | 42 | 73  | 73  | 96  | 85  | 62  | 81  | 49  |
| 30 | 25 | 48 | 45  | 65  | 55  | 51  | 34  | 40  | 29  |
| 11 | 16 | 22 | 26  | 36  | 43  | 40  | 41  | 54  | 20  |
| 65 | 60 | 62 | 187 | 263 | 222 | 255 | 213 | 246 | 123 |
| 37 | 43 | 39 | 187 | 225 | 177 | 202 | 134 | 168 | 87  |
| 57 | 51 | 70 | 151 | 210 | 178 | 171 | 146 | 181 | 80  |
| 47 | 51 | 44 | 45  | 54  | 58  | 39  | 27  | 35  | 34  |

|    |    |    |     |     |     |     |     |     |     |
|----|----|----|-----|-----|-----|-----|-----|-----|-----|
| 17 | 20 | 21 | 24  | 33  | 27  | 14  | 20  | 22  | 25  |
| 41 | 33 | 43 | 78  | 88  | 80  | 60  | 82  | 70  | 40  |
| 54 | 49 | 53 | 129 | 140 | 128 | 129 | 140 | 184 | 93  |
| 28 | 32 | 34 | 52  | 67  | 61  | 73  | 75  | 77  | 45  |
| 30 | 23 | 28 | 35  | 30  | 32  | 28  | 50  | 42  | 21  |
| 57 | 48 | 74 | 127 | 144 | 166 | 199 | 186 | 209 | 101 |
| 51 | 30 | 36 | 118 | 157 | 141 | 134 | 130 | 115 | 50  |
| 32 | 35 | 38 | 39  | 47  | 40  | 44  | 49  | 44  | 31  |
| 52 | 48 | 43 | 158 | 179 | 164 | 193 | 158 | 174 | 85  |
| 55 | 46 | 48 | 64  | 87  | 74  | 52  | 63  | 50  | 53  |
| 38 | 59 | 71 | 144 | 134 | 156 | 157 | 130 | 160 | 69  |
| 28 | 34 | 35 | 190 | 261 | 245 | 178 | 166 | 177 | 47  |
| 43 | 35 | 43 | 40  | 52  | 44  | 37  | 37  | 37  | 36  |
| 66 | 60 | 46 | 58  | 86  | 82  | 80  | 93  | 80  | 51  |
| 50 | 59 | 60 | 83  | 98  | 75  | 111 | 131 | 123 | 56  |
| 32 | 36 | 22 | 86  | 96  | 74  | 74  | 62  | 65  | 40  |
| 66 | 60 | 84 | 38  | 53  | 59  | 60  | 73  | 66  | 69  |
| 19 | 39 | 19 | 22  | 25  | 23  | 33  | 37  | 42  | 29  |
| 98 | 73 | 91 | 162 | 214 | 141 | 260 | 229 | 233 | 131 |
| 40 | 50 | 59 | 106 | 158 | 135 | 136 | 110 | 138 | 66  |
| 23 | 11 | 10 | 30  | 34  | 40  | 51  | 46  | 29  | 18  |
| 18 | 31 | 25 | 41  | 45  | 37  | 47  | 55  | 59  | 39  |
| 55 | 68 | 72 | 153 | 217 | 181 | 246 | 210 | 239 | 113 |
| 40 | 40 | 54 | 79  | 80  | 86  | 107 | 77  | 101 | 55  |
| 24 | 29 | 30 | 47  | 77  | 53  | 50  | 44  | 55  | 28  |
| 13 | 16 | 6  | 77  | 100 | 97  | 62  | 59  | 60  | 26  |
| 14 | 20 | 19 | 78  | 99  | 81  | 102 | 80  | 98  | 41  |
| 38 | 49 | 51 | 77  | 100 | 81  | 54  | 47  | 48  | 42  |
| 37 | 38 | 38 | 47  | 56  | 45  | 50  | 33  | 53  | 39  |
| 53 | 42 | 66 | 202 | 283 | 230 | 113 | 95  | 115 | 65  |
| 23 | 26 | 18 | 24  | 40  | 38  | 43  | 28  | 34  | 17  |
| 22 | 22 | 24 | 75  | 99  | 57  | 68  | 62  | 74  | 24  |
| 42 | 27 | 30 | 42  | 59  | 53  | 79  | 59  | 50  | 39  |
| 46 | 46 | 53 | 117 | 127 | 108 | 96  | 90  | 102 | 44  |
| 68 | 83 | 80 | 94  | 108 | 91  | 115 | 98  | 106 | 66  |
| 39 | 38 | 58 | 88  | 115 | 104 | 115 | 97  | 115 | 55  |
| 50 | 20 | 44 | 46  | 45  | 33  | 41  | 44  | 41  | 36  |
| 20 | 28 | 30 | 77  | 112 | 83  | 87  | 64  | 93  | 39  |
| 25 | 17 | 22 | 21  | 34  | 32  | 14  | 25  | 22  | 14  |
| 39 | 33 | 48 | 35  | 44  | 42  | 34  | 63  | 48  | 39  |
| 60 | 44 | 57 | 55  | 80  | 65  | 73  | 77  | 71  | 59  |

|    |    |     |     |     |     |     |     |     |     |
|----|----|-----|-----|-----|-----|-----|-----|-----|-----|
| 32 | 32 | 33  | 169 | 216 | 181 | 288 | 232 | 250 | 112 |
| 51 | 43 | 69  | 40  | 41  | 44  | 40  | 41  | 53  | 39  |
| 19 | 22 | 26  | 74  | 95  | 78  | 58  | 54  | 60  | 33  |
| 56 | 51 | 35  | 36  | 47  | 36  | 37  | 42  | 48  | 39  |
| 7  | 27 | 19  | 41  | 62  | 85  | 29  | 32  | 36  | 25  |
| 85 | 82 | 100 | 91  | 131 | 101 | 160 | 166 | 205 | 99  |
| 31 | 37 | 41  | 45  | 41  | 49  | 45  | 48  | 52  | 43  |
| 45 | 41 | 63  | 106 | 142 | 121 | 186 | 172 | 153 | 84  |
| 44 | 39 | 43  | 152 | 176 | 140 | 195 | 169 | 184 | 85  |
| 15 | 17 | 30  | 64  | 71  | 64  | 67  | 59  | 52  | 37  |
| 22 | 20 | 21  | 47  | 43  | 65  | 50  | 46  | 44  | 27  |
| 29 | 26 | 23  | 81  | 122 | 101 | 149 | 116 | 135 | 72  |
| 25 | 18 | 27  | 54  | 80  | 72  | 81  | 81  | 69  | 39  |
| 60 | 51 | 58  | 126 | 170 | 154 | 188 | 151 | 160 | 99  |
| 28 | 20 | 29  | 69  | 91  | 75  | 103 | 76  | 89  | 32  |
| 16 | 20 | 18  | 8   | 11  | 19  | 10  | 10  | 10  | 13  |
| 32 | 25 | 19  | 38  | 46  | 61  | 48  | 39  | 42  | 24  |
| 19 | 16 | 23  | 98  | 163 | 125 | 121 | 101 | 104 | 35  |
| 27 | 25 | 30  | 118 | 156 | 133 | 124 | 124 | 122 | 49  |
| 34 | 34 | 45  | 40  | 46  | 36  | 43  | 38  | 36  | 34  |
| 29 | 37 | 42  | 71  | 135 | 97  | 90  | 92  | 127 | 47  |
| 50 | 51 | 51  | 84  | 125 | 122 | 95  | 78  | 92  | 54  |
| 35 | 33 | 43  | 57  | 60  | 69  | 54  | 81  | 74  | 61  |
| 44 | 45 | 47  | 97  | 135 | 88  | 63  | 61  | 73  | 46  |
| 45 | 39 | 49  | 163 | 149 | 175 | 176 | 152 | 207 | 76  |
| 2  | 3  | 8   | 19  | 28  | 28  | 20  | 13  | 10  | 6   |
| 52 | 53 | 46  | 91  | 108 | 97  | 89  | 83  | 72  | 42  |
| 78 | 66 | 76  | 61  | 78  | 76  | 88  | 78  | 87  | 48  |
| 42 | 48 | 43  | 80  | 101 | 87  | 60  | 57  | 68  | 47  |
| 19 | 20 | 25  | 118 | 118 | 110 | 118 | 98  | 113 | 46  |
| 50 | 44 | 52  | 44  | 64  | 48  | 75  | 85  | 70  | 51  |
| 22 | 30 | 23  | 91  | 116 | 101 | 109 | 102 | 108 | 37  |
| 18 | 18 | 22  | 65  | 78  | 74  | 79  | 63  | 86  | 41  |
| 36 | 36 | 42  | 60  | 58  | 64  | 69  | 50  | 54  | 53  |
| 29 | 35 | 40  | 81  | 120 | 86  | 65  | 58  | 68  | 48  |
| 18 | 28 | 25  | 44  | 25  | 47  | 51  | 54  | 41  | 48  |
| 42 | 51 | 48  | 52  | 60  | 62  | 59  | 52  | 67  | 52  |
| 20 | 28 | 29  | 97  | 126 | 117 | 151 | 109 | 145 | 49  |
| 37 | 32 | 32  | 100 | 140 | 127 | 108 | 83  | 127 | 68  |
| 31 | 28 | 29  | 59  | 79  | 63  | 109 | 76  | 88  | 42  |
| 31 | 33 | 27  | 123 | 163 | 122 | 84  | 77  | 79  | 39  |

|    |    |    |     |     |     |     |     |     |     |
|----|----|----|-----|-----|-----|-----|-----|-----|-----|
| 23 | 38 | 40 | 34  | 37  | 30  | 42  | 26  | 33  | 31  |
| 41 | 48 | 52 | 86  | 132 | 95  | 92  | 74  | 72  | 49  |
| 57 | 57 | 64 | 133 | 169 | 154 | 149 | 133 | 167 | 69  |
| 46 | 59 | 61 | 102 | 126 | 115 | 87  | 64  | 77  | 69  |
| 41 | 59 | 52 | 46  | 46  | 55  | 44  | 51  | 49  | 54  |
| 11 | 17 | 14 | 125 | 198 | 147 | 130 | 82  | 99  | 52  |
| 83 | 93 | 91 | 131 | 140 | 141 | 165 | 162 | 171 | 118 |
| 53 | 61 | 52 | 229 | 261 | 235 | 247 | 230 | 256 | 134 |
| 49 | 36 | 43 | 73  | 107 | 124 | 82  | 75  | 73  | 52  |
| 5  | 9  | 7  | 61  | 88  | 58  | 29  | 33  | 21  | 17  |
| 80 | 87 | 95 | 78  | 131 | 94  | 120 | 87  | 107 | 92  |
| 41 | 32 | 31 | 147 | 189 | 182 | 290 | 234 | 280 | 106 |
| 64 | 55 | 64 | 79  | 107 | 103 | 103 | 81  | 95  | 57  |
| 10 | 9  | 11 | 27  | 34  | 24  | 13  | 15  | 20  | 11  |
| 18 | 21 | 16 | 10  | 16  | 23  | 18  | 24  | 16  | 26  |
| 36 | 49 | 39 | 102 | 111 | 80  | 71  | 94  | 86  | 44  |
| 13 | 17 | 15 | 21  | 23  | 10  | 27  | 21  | 21  | 26  |
| 28 | 42 | 34 | 112 | 143 | 125 | 153 | 111 | 141 | 80  |
| 98 | 98 | 96 | 94  | 114 | 114 | 185 | 138 | 138 | 129 |
| 40 | 39 | 42 | 74  | 132 | 89  | 65  | 60  | 55  | 39  |
| 67 | 63 | 65 | 109 | 154 | 170 | 166 | 124 | 171 | 85  |
| 28 | 33 | 28 | 19  | 19  | 15  | 18  | 17  | 22  | 22  |
| 55 | 60 | 60 | 146 | 175 | 140 | 206 | 215 | 217 | 88  |
| 29 | 35 | 39 | 92  | 125 | 109 | 90  | 78  | 90  | 37  |
| 11 | 18 | 16 | 71  | 107 | 83  | 69  | 60  | 61  | 29  |
| 9  | 15 | 17 | 21  | 37  | 16  | 23  | 24  | 28  | 16  |
| 61 | 64 | 94 | 178 | 192 | 170 | 218 | 177 | 239 | 124 |
| 68 | 74 | 82 | 107 | 121 | 136 | 149 | 121 | 94  | 58  |
| 41 | 47 | 59 | 362 | 466 | 389 | 478 | 452 | 508 | 235 |
| 34 | 37 | 43 | 81  | 112 | 62  | 75  | 60  | 79  | 33  |
| 17 | 20 | 19 | 22  | 48  | 24  | 31  | 15  | 28  | 19  |
| 9  | 7  | 6  | 9   | 0   | 4   | 13  | 8   | 11  | 9   |
| 33 | 32 | 29 | 213 | 263 | 200 | 277 | 252 | 318 | 128 |
| 38 | 46 | 49 | 209 | 294 | 235 | 255 | 213 | 242 | 116 |
| 20 | 7  | 4  | 54  | 65  | 40  | 22  | 27  | 26  | 8   |
| 45 | 50 | 73 | 395 | 495 | 439 | 564 | 491 | 502 | 237 |
| 24 | 16 | 15 | 40  | 47  | 31  | 46  | 37  | 41  | 19  |
| 31 | 38 | 53 | 245 | 326 | 293 | 317 | 264 | 269 | 139 |
| 28 | 35 | 40 | 62  | 103 | 83  | 107 | 82  | 81  | 37  |
| 40 | 36 | 38 | 36  | 45  | 45  | 70  | 68  | 58  | 40  |
| 64 | 60 | 60 | 85  | 111 | 91  | 91  | 80  | 97  | 64  |



|    |     |    |     |     |     |     |     |     |     |
|----|-----|----|-----|-----|-----|-----|-----|-----|-----|
| 14 | 17  | 15 | 71  | 97  | 66  | 80  | 68  | 84  | 29  |
| 51 | 43  | 64 | 109 | 139 | 118 | 136 | 118 | 100 | 53  |
| 95 | 100 | 95 | 58  | 80  | 66  | 119 | 122 | 107 | 113 |
| 73 | 61  | 64 | 168 | 197 | 191 | 275 | 235 | 287 | 122 |
| 54 | 46  | 66 | 417 | 576 | 478 | 653 | 519 | 636 | 316 |
| 60 | 61  | 48 | 116 | 136 | 121 | 142 | 123 | 110 | 89  |
| 30 | 27  | 23 | 65  | 79  | 84  | 86  | 88  | 91  | 41  |
| 56 | 62  | 63 | 100 | 126 | 109 | 114 | 118 | 119 | 70  |
| 60 | 63  | 50 | 77  | 84  | 85  | 100 | 89  | 101 | 57  |
| 37 | 44  | 53 | 48  | 52  | 37  | 74  | 73  | 79  | 44  |
| 20 | 20  | 16 | 164 | 215 | 164 | 158 | 135 | 138 | 55  |
| 24 | 16  | 27 | 135 | 207 | 139 | 119 | 105 | 129 | 52  |
| 83 | 90  | 79 | 81  | 110 | 97  | 143 | 146 | 148 | 94  |
| 67 | 66  | 63 | 136 | 158 | 136 | 117 | 122 | 119 | 75  |
| 29 | 23  | 40 | 41  | 62  | 48  | 49  | 39  | 55  | 39  |
| 33 | 39  | 38 | 64  | 72  | 60  | 39  | 35  | 38  | 30  |
| 3  | 1   | 3  | 3   | 8   | 4   | 7   | 4   | 4   | 3   |
| 26 | 31  | 32 | 29  | 34  | 25  | 32  | 27  | 32  | 22  |
| 84 | 89  | 84 | 123 | 150 | 129 | 169 | 145 | 148 | 97  |
| 14 | 22  | 15 | 10  | 8   | 8   | 9   | 10  | 8   | 13  |
| 22 | 21  | 35 | 30  | 35  | 31  | 35  | 39  | 41  | 29  |
| 45 | 27  | 48 | 78  | 92  | 82  | 70  | 75  | 75  | 47  |
| 62 | 58  | 79 | 62  | 58  | 67  | 103 | 93  | 84  | 69  |
| 13 | 23  | 16 | 141 | 183 | 117 | 216 | 154 | 201 | 82  |
| 43 | 41  | 39 | 168 | 225 | 156 | 191 | 176 | 178 | 90  |
| 45 | 25  | 34 | 42  | 66  | 68  | 35  | 36  | 44  | 36  |
| 52 | 47  | 52 | 47  | 60  | 43  | 52  | 46  | 44  | 30  |
| 37 | 33  | 33 | 435 | 551 | 490 | 468 | 398 | 468 | 220 |
| 37 | 40  | 32 | 60  | 78  | 97  | 115 | 111 | 127 | 63  |
| 23 | 29  | 33 | 78  | 113 | 78  | 61  | 70  | 62  | 19  |
| 17 | 25  | 26 | 169 | 236 | 162 | 137 | 137 | 160 | 64  |
| 34 | 46  | 45 | 31  | 47  | 37  | 36  | 30  | 35  | 33  |
| 62 | 49  | 38 | 82  | 96  | 90  | 97  | 89  | 78  | 66  |
| 52 | 35  | 44 | 113 | 181 | 117 | 76  | 67  | 88  | 48  |
| 26 | 33  | 37 | 117 | 132 | 131 | 115 | 106 | 112 | 62  |
| 26 | 23  | 41 | 49  | 73  | 76  | 68  | 52  | 55  | 34  |
| 35 | 29  | 28 | 30  | 53  | 39  | 42  | 42  | 36  | 32  |
| 46 | 41  | 33 | 50  | 47  | 73  | 70  | 68  | 65  | 43  |
| 28 | 22  | 31 | 98  | 135 | 129 | 123 | 109 | 141 | 58  |
| 20 | 15  | 23 | 48  | 60  | 70  | 62  | 49  | 63  | 24  |
| 24 | 24  | 31 | 101 | 132 | 89  | 105 | 90  | 120 | 40  |

|    |    |    |     |     |     |     |     |     |     |
|----|----|----|-----|-----|-----|-----|-----|-----|-----|
| 30 | 25 | 36 | 61  | 68  | 55  | 58  | 42  | 57  | 35  |
| 20 | 19 | 25 | 67  | 76  | 65  | 56  | 52  | 51  | 26  |
| 30 | 29 | 44 | 78  | 107 | 101 | 76  | 65  | 82  | 70  |
| 31 | 25 | 40 | 55  | 79  | 64  | 75  | 77  | 82  | 42  |
| 39 | 27 | 31 | 81  | 109 | 118 | 119 | 96  | 118 | 61  |
| 71 | 63 | 70 | 210 | 245 | 218 | 248 | 200 | 209 | 106 |
| 12 | 21 | 22 | 23  | 28  | 30  | 27  | 17  | 25  | 14  |
| 47 | 43 | 36 | 218 | 276 | 229 | 187 | 149 | 207 | 97  |
| 43 | 44 | 41 | 70  | 67  | 69  | 55  | 66  | 76  | 45  |
| 57 | 71 | 80 | 41  | 40  | 48  | 80  | 86  | 80  | 72  |
| 18 | 20 | 16 | 23  | 33  | 23  | 20  | 19  | 28  | 19  |
| 31 | 32 | 41 | 68  | 75  | 69  | 49  | 66  | 72  | 36  |
| 24 | 35 | 32 | 45  | 75  | 57  | 80  | 75  | 79  | 47  |
| 61 | 59 | 66 | 127 | 166 | 117 | 115 | 106 | 102 | 64  |
| 56 | 55 | 46 | 123 | 153 | 124 | 178 | 166 | 185 | 95  |
| 32 | 39 | 40 | 122 | 140 | 132 | 151 | 113 | 146 | 66  |
| 61 | 77 | 68 | 175 | 216 | 172 | 365 | 323 | 338 | 121 |
| 49 | 39 | 53 | 155 | 172 | 173 | 126 | 100 | 129 | 66  |
| 31 | 20 | 31 | 26  | 34  | 30  | 31  | 35  | 22  | 26  |
| 76 | 81 | 85 | 193 | 194 | 211 | 233 | 214 | 211 | 113 |
| 40 | 39 | 47 | 85  | 97  | 80  | 91  | 66  | 88  | 53  |
| 69 | 80 | 95 | 372 | 484 | 396 | 472 | 437 | 560 | 212 |
| 22 | 25 | 23 | 22  | 30  | 48  | 50  | 40  | 47  | 24  |
| 28 | 25 | 27 | 60  | 53  | 57  | 58  | 45  | 54  | 22  |
| 21 | 18 | 30 | 64  | 72  | 62  | 55  | 68  | 76  | 35  |
| 15 | 10 | 6  | 164 | 252 | 185 | 115 | 85  | 125 | 57  |
| 25 | 34 | 30 | 76  | 95  | 87  | 51  | 41  | 51  | 24  |
| 48 | 73 | 66 | 89  | 114 | 110 | 111 | 95  | 123 | 82  |
| 49 | 44 | 42 | 503 | 637 | 499 | 659 | 484 | 600 | 271 |
| 44 | 39 | 59 | 77  | 122 | 114 | 138 | 139 | 122 | 62  |
| 29 | 37 | 32 | 39  | 58  | 44  | 43  | 45  | 38  | 37  |
| 44 | 39 | 54 | 188 | 231 | 218 | 247 | 193 | 217 | 120 |
| 19 | 35 | 32 | 49  | 63  | 47  | 45  | 37  | 46  | 29  |
| 18 | 30 | 39 | 49  | 54  | 54  | 52  | 42  | 41  | 25  |
| 75 | 61 | 64 | 309 | 426 | 377 | 381 | 316 | 370 | 164 |
| 36 | 34 | 29 | 97  | 101 | 106 | 140 | 90  | 83  | 46  |
| 51 | 62 | 48 | 113 | 113 | 120 | 129 | 109 | 159 | 64  |
| 24 | 32 | 32 | 114 | 148 | 109 | 95  | 92  | 107 | 59  |
| 24 | 33 | 25 | 43  | 42  | 76  | 85  | 85  | 106 | 44  |
| 37 | 42 | 47 | 178 | 204 | 137 | 252 | 193 | 228 | 94  |
| 34 | 44 | 38 | 63  | 47  | 68  | 67  | 96  | 48  | 66  |

|    |    |    |     |     |     |     |     |     |     |
|----|----|----|-----|-----|-----|-----|-----|-----|-----|
| 47 | 40 | 35 | 89  | 80  | 105 | 67  | 51  | 66  | 37  |
| 55 | 63 | 48 | 78  | 111 | 101 | 77  | 69  | 76  | 58  |
| 37 | 28 | 32 | 32  | 42  | 34  | 34  | 36  | 40  | 41  |
| 51 | 51 | 68 | 79  | 108 | 90  | 64  | 60  | 67  | 58  |
| 56 | 53 | 54 | 72  | 81  | 82  | 115 | 108 | 114 | 56  |
| 28 | 38 | 43 | 58  | 71  | 55  | 52  | 45  | 47  | 35  |
| 22 | 34 | 37 | 47  | 49  | 38  | 77  | 55  | 62  | 35  |
| 36 | 42 | 47 | 52  | 54  | 55  | 70  | 54  | 65  | 47  |
| 53 | 39 | 37 | 106 | 150 | 121 | 165 | 175 | 177 | 66  |
| 37 | 52 | 52 | 177 | 234 | 192 | 186 | 182 | 200 | 108 |
| 75 | 86 | 65 | 235 | 300 | 302 | 317 | 276 | 320 | 135 |
| 36 | 29 | 36 | 47  | 55  | 52  | 46  | 40  | 41  | 45  |
| 33 | 33 | 33 | 43  | 48  | 65  | 57  | 61  | 62  | 31  |
| 43 | 24 | 29 | 49  | 51  | 60  | 66  | 58  | 61  | 37  |
| 54 | 64 | 77 | 74  | 99  | 122 | 130 | 137 | 141 | 84  |
| 19 | 27 | 31 | 52  | 58  | 52  | 41  | 46  | 34  | 28  |
| 22 | 23 | 17 | 52  | 42  | 50  | 62  | 38  | 33  | 30  |
| 36 | 37 | 43 | 107 | 126 | 109 | 121 | 106 | 120 | 54  |
| 21 | 21 | 21 | 18  | 17  | 25  | 14  | 15  | 15  | 16  |
| 14 | 18 | 19 | 24  | 19  | 19  | 44  | 30  | 33  | 21  |
| 25 | 33 | 46 | 27  | 29  | 28  | 39  | 40  | 23  | 28  |
| 38 | 40 | 51 | 31  | 47  | 47  | 31  | 30  | 33  | 40  |
| 35 | 55 | 56 | 57  | 60  | 63  | 77  | 68  | 91  | 54  |
| 30 | 29 | 34 | 127 | 206 | 159 | 153 | 127 | 145 | 74  |
| 60 | 59 | 76 | 182 | 240 | 192 | 188 | 175 | 186 | 79  |
| 40 | 26 | 33 | 117 | 146 | 146 | 154 | 127 | 142 | 79  |
| 42 | 52 | 46 | 348 | 446 | 426 | 419 | 329 | 433 | 178 |
| 18 | 27 | 27 | 79  | 115 | 87  | 92  | 74  | 70  | 42  |
| 38 | 46 | 46 | 55  | 88  | 58  | 62  | 89  | 86  | 62  |
| 43 | 54 | 69 | 92  | 138 | 125 | 125 | 106 | 120 | 82  |
| 24 | 22 | 35 | 53  | 86  | 85  | 78  | 72  | 85  | 44  |
| 20 | 25 | 25 | 26  | 37  | 35  | 54  | 37  | 62  | 23  |
| 22 | 17 | 25 | 44  | 50  | 45  | 41  | 38  | 38  | 22  |
| 23 | 20 | 26 | 140 | 189 | 145 | 118 | 84  | 130 | 47  |
| 45 | 64 | 47 | 93  | 132 | 130 | 99  | 70  | 109 | 68  |
| 10 | 10 | 11 | 62  | 134 | 81  | 100 | 63  | 104 | 37  |
| 60 | 64 | 62 | 98  | 158 | 151 | 111 | 81  | 114 | 83  |
| 35 | 20 | 18 | 44  | 50  | 45  | 41  | 35  | 35  | 26  |
| 46 | 58 | 36 | 161 | 192 | 218 | 190 | 169 | 176 | 84  |
| 67 | 50 | 55 | 175 | 236 | 201 | 284 | 289 | 306 | 155 |
| 20 | 20 | 22 | 83  | 122 | 97  | 103 | 92  | 101 | 45  |

|    |    |    |     |     |     |     |     |     |     |
|----|----|----|-----|-----|-----|-----|-----|-----|-----|
| 51 | 50 | 53 | 143 | 197 | 203 | 308 | 284 | 316 | 151 |
| 36 | 37 | 33 | 139 | 192 | 157 | 177 | 143 | 194 | 78  |
| 25 | 19 | 19 | 28  | 46  | 44  | 53  | 33  | 54  | 30  |
| 45 | 41 | 43 | 48  | 61  | 76  | 88  | 76  | 66  | 55  |
| 66 | 65 | 77 | 556 | 669 | 584 | 920 | 705 | 854 | 459 |
| 48 | 68 | 60 | 167 | 203 | 225 | 254 | 235 | 279 | 120 |
| 40 | 48 | 36 | 248 | 327 | 278 | 270 | 229 | 310 | 122 |
| 53 | 49 | 57 | 46  | 48  | 58  | 50  | 51  | 61  | 41  |
| 71 | 66 | 85 | 207 | 255 | 203 | 212 | 196 | 252 | 118 |
| 45 | 60 | 58 | 85  | 154 | 124 | 180 | 148 | 190 | 107 |
| 53 | 53 | 32 | 88  | 84  | 86  | 71  | 67  | 73  | 59  |
| 37 | 36 | 37 | 39  | 59  | 51  | 70  | 70  | 84  | 47  |
| 25 | 36 | 40 | 119 | 165 | 157 | 153 | 132 | 184 | 87  |
| 29 | 33 | 37 | 77  | 97  | 106 | 132 | 128 | 124 | 77  |
| 58 | 48 | 81 | 109 | 125 | 129 | 131 | 117 | 132 | 74  |
| 20 | 23 | 23 | 336 | 423 | 348 | 386 | 286 | 356 | 182 |
| 19 | 12 | 12 | 15  | 30  | 36  | 35  | 42  | 34  | 21  |
| 37 | 41 | 48 | 78  | 108 | 86  | 80  | 53  | 56  | 41  |
| 35 | 30 | 30 | 270 | 285 | 251 | 332 | 280 | 311 | 135 |
| 4  | 7  | 8  | 63  | 96  | 76  | 59  | 52  | 43  | 22  |
| 56 | 68 | 64 | 146 | 187 | 168 | 174 | 136 | 171 | 106 |
| 50 | 40 | 41 | 68  | 110 | 80  | 91  | 79  | 93  | 68  |
| 28 | 35 | 38 | 126 | 178 | 127 | 186 | 142 | 166 | 96  |
| 33 | 31 | 37 | 110 | 157 | 133 | 166 | 126 | 153 | 51  |
| 30 | 43 | 42 | 67  | 82  | 63  | 81  | 82  | 74  | 51  |
| 37 | 32 | 34 | 105 | 98  | 124 | 93  | 106 | 112 | 72  |
| 45 | 43 | 56 | 199 | 219 | 183 | 144 | 131 | 132 | 82  |
| 43 | 43 | 51 | 84  | 91  | 100 | 92  | 92  | 94  | 64  |
| 39 | 32 | 38 | 165 | 186 | 192 | 151 | 131 | 145 | 62  |
| 57 | 59 | 69 | 62  | 69  | 50  | 78  | 76  | 71  | 55  |
| 37 | 29 | 54 | 91  | 95  | 83  | 82  | 81  | 73  | 58  |
| 53 | 45 | 48 | 56  | 50  | 80  | 62  | 77  | 83  | 58  |
| 28 | 31 | 31 | 48  | 76  | 52  | 84  | 99  | 80  | 44  |
| 54 | 46 | 60 | 484 | 549 | 555 | 696 | 612 | 709 | 433 |
| 42 | 49 | 73 | 70  | 115 | 106 | 106 | 92  | 96  | 69  |
| 28 | 16 | 29 | 168 | 209 | 157 | 99  | 115 | 120 | 42  |
| 26 | 30 | 37 | 69  | 88  | 82  | 75  | 70  | 76  | 44  |
| 11 | 14 | 10 | 29  | 30  | 27  | 23  | 17  | 24  | 16  |
| 9  | 5  | 12 | 66  | 83  | 68  | 77  | 71  | 83  | 29  |
| 45 | 38 | 36 | 48  | 52  | 37  | 46  | 42  | 53  | 28  |
| 12 | 9  | 16 | 34  | 55  | 42  | 67  | 43  | 49  | 28  |

|    |    |    |     |     |     |     |     |     |     |
|----|----|----|-----|-----|-----|-----|-----|-----|-----|
| 34 | 39 | 41 | 38  | 67  | 42  | 49  | 47  | 40  | 32  |
| 42 | 47 | 56 | 93  | 119 | 106 | 101 | 99  | 94  | 62  |
| 42 | 40 | 56 | 162 | 214 | 189 | 152 | 149 | 182 | 79  |
| 16 | 16 | 17 | 34  | 48  | 35  | 16  | 23  | 25  | 24  |
| 39 | 26 | 44 | 88  | 129 | 106 | 102 | 95  | 120 | 44  |
| 16 | 20 | 30 | 182 | 206 | 187 | 195 | 177 | 205 | 115 |
| 57 | 49 | 65 | 105 | 123 | 89  | 136 | 114 | 96  | 57  |
| 73 | 66 | 70 | 115 | 112 | 115 | 69  | 63  | 79  | 40  |
| 46 | 45 | 64 | 402 | 552 | 433 | 540 | 469 | 532 | 244 |
| 27 | 21 | 31 | 40  | 61  | 47  | 51  | 47  | 51  | 39  |
| 39 | 20 | 39 | 41  | 43  | 55  | 38  | 37  | 47  | 46  |
| 73 | 76 | 82 | 101 | 100 | 108 | 116 | 100 | 121 | 74  |
| 70 | 69 | 75 | 112 | 111 | 117 | 127 | 115 | 135 | 95  |
| 31 | 27 | 26 | 37  | 58  | 48  | 67  | 53  | 68  | 32  |
| 27 | 40 | 40 | 60  | 84  | 65  | 71  | 55  | 87  | 40  |
| 34 | 42 | 44 | 117 | 180 | 158 | 147 | 137 | 149 | 78  |
| 38 | 39 | 38 | 157 | 196 | 176 | 204 | 168 | 170 | 71  |
| 40 | 32 | 46 | 163 | 208 | 180 | 159 | 123 | 168 | 81  |
| 28 | 25 | 36 | 71  | 82  | 64  | 67  | 79  | 77  | 39  |
| 59 | 74 | 69 | 115 | 140 | 130 | 161 | 140 | 128 | 103 |
| 26 | 51 | 31 | 36  | 58  | 49  | 49  | 42  | 45  | 32  |
| 21 | 38 | 32 | 72  | 108 | 95  | 62  | 43  | 64  | 36  |
| 40 | 63 | 79 | 129 | 163 | 152 | 155 | 121 | 127 | 57  |
| 31 | 29 | 27 | 47  | 66  | 56  | 56  | 31  | 68  | 30  |
| 32 | 30 | 44 | 371 | 394 | 346 | 513 | 412 | 504 | 324 |
| 20 | 30 | 25 | 16  | 20  | 22  | 28  | 17  | 21  | 24  |
| 51 | 46 | 58 | 79  | 102 | 83  | 75  | 62  | 86  | 60  |
| 33 | 28 | 32 | 229 | 285 | 263 | 301 | 298 | 282 | 101 |
| 27 | 39 | 24 | 103 | 127 | 96  | 126 | 109 | 111 | 60  |
| 19 | 24 | 20 | 59  | 63  | 61  | 74  | 66  | 64  | 55  |
| 33 | 40 | 32 | 152 | 177 | 161 | 157 | 148 | 153 | 62  |
| 41 | 45 | 52 | 384 | 474 | 471 | 397 | 335 | 381 | 193 |
| 64 | 57 | 66 | 82  | 103 | 111 | 76  | 70  | 81  | 47  |
| 59 | 49 | 60 | 106 | 147 | 118 | 133 | 149 | 152 | 97  |
| 7  | 14 | 6  | 36  | 34  | 26  | 37  | 25  | 28  | 13  |
| 62 | 56 | 58 | 113 | 164 | 128 | 107 | 87  | 93  | 66  |
| 35 | 23 | 43 | 287 | 417 | 316 | 349 | 270 | 347 | 120 |
| 85 | 65 | 74 | 87  | 111 | 108 | 144 | 138 | 134 | 72  |
| 13 | 17 | 19 | 38  | 73  | 74  | 87  | 70  | 85  | 41  |
| 48 | 44 | 48 | 45  | 64  | 59  | 81  | 57  | 91  | 39  |
| 64 | 47 | 85 | 56  | 97  | 78  | 153 | 120 | 131 | 77  |

|     |     |     |     |     |     |     |     |     |     |
|-----|-----|-----|-----|-----|-----|-----|-----|-----|-----|
| 48  | 53  | 53  | 115 | 172 | 170 | 181 | 160 | 177 | 84  |
| 44  | 40  | 66  | 155 | 178 | 145 | 103 | 90  | 82  | 50  |
| 61  | 43  | 52  | 88  | 93  | 85  | 71  | 57  | 50  | 50  |
| 35  | 32  | 44  | 76  | 120 | 114 | 134 | 124 | 131 | 68  |
| 18  | 31  | 22  | 48  | 74  | 70  | 59  | 58  | 72  | 32  |
| 38  | 53  | 40  | 133 | 251 | 243 | 215 | 178 | 236 | 124 |
| 68  | 78  | 81  | 122 | 179 | 146 | 203 | 149 | 194 | 124 |
| 63  | 75  | 75  | 74  | 91  | 84  | 91  | 102 | 100 | 77  |
| 27  | 14  | 31  | 24  | 39  | 20  | 26  | 21  | 19  | 22  |
| 49  | 38  | 29  | 286 | 299 | 265 | 309 | 246 | 305 | 126 |
| 37  | 33  | 68  | 158 | 209 | 185 | 320 | 256 | 300 | 141 |
| 44  | 32  | 47  | 142 | 157 | 131 | 150 | 136 | 143 | 86  |
| 42  | 52  | 58  | 207 | 279 | 235 | 248 | 217 | 229 | 119 |
| 66  | 51  | 78  | 52  | 92  | 69  | 100 | 106 | 111 | 80  |
| 52  | 71  | 59  | 91  | 110 | 103 | 144 | 142 | 151 | 67  |
| 47  | 64  | 72  | 377 | 435 | 452 | 372 | 301 | 330 | 179 |
| 22  | 27  | 27  | 40  | 56  | 43  | 68  | 57  | 48  | 29  |
| 33  | 35  | 40  | 139 | 193 | 113 | 181 | 125 | 149 | 49  |
| 16  | 10  | 14  | 37  | 26  | 32  | 20  | 22  | 32  | 16  |
| 30  | 31  | 36  | 57  | 68  | 57  | 56  | 55  | 52  | 28  |
| 39  | 33  | 28  | 40  | 40  | 27  | 29  | 49  | 40  | 21  |
| 91  | 103 | 92  | 324 | 451 | 397 | 494 | 444 | 475 | 206 |
| 15  | 18  | 14  | 67  | 79  | 74  | 63  | 42  | 65  | 30  |
| 64  | 66  | 83  | 77  | 96  | 92  | 96  | 77  | 91  | 62  |
| 12  | 10  | 18  | 82  | 115 | 84  | 101 | 72  | 78  | 35  |
| 45  | 39  | 36  | 194 | 276 | 217 | 300 | 226 | 266 | 119 |
| 9   | 12  | 10  | 98  | 124 | 71  | 100 | 91  | 86  | 31  |
| 51  | 38  | 59  | 255 | 296 | 266 | 377 | 352 | 408 | 182 |
| 18  | 10  | 18  | 20  | 27  | 19  | 38  | 32  | 28  | 19  |
| 100 | 103 | 132 | 111 | 163 | 132 | 192 | 153 | 177 | 126 |
| 81  | 88  | 80  | 208 | 262 | 238 | 184 | 170 | 205 | 114 |
| 48  | 68  | 60  | 98  | 126 | 101 | 66  | 66  | 72  | 45  |
| 14  | 15  | 13  | 17  | 30  | 16  | 17  | 21  | 25  | 13  |
| 67  | 48  | 72  | 124 | 158 | 136 | 82  | 82  | 85  | 65  |
| 22  | 14  | 21  | 62  | 69  | 62  | 90  | 80  | 72  | 32  |
| 25  | 22  | 29  | 50  | 82  | 58  | 50  | 48  | 38  | 32  |
| 22  | 16  | 32  | 305 | 413 | 321 | 433 | 290 | 332 | 172 |
| 19  | 13  | 22  | 30  | 39  | 29  | 25  | 30  | 28  | 21  |
| 55  | 44  | 45  | 119 | 156 | 133 | 137 | 132 | 165 | 52  |
| 11  | 17  | 29  | 34  | 36  | 23  | 28  | 38  | 33  | 23  |
| 26  | 32  | 37  | 36  | 55  | 38  | 60  | 47  | 57  | 29  |

|    |     |     |     |     |     |     |     |     |     |
|----|-----|-----|-----|-----|-----|-----|-----|-----|-----|
| 16 | 25  | 25  | 31  | 52  | 47  | 59  | 33  | 40  | 34  |
| 44 | 64  | 52  | 85  | 126 | 99  | 105 | 98  | 110 | 59  |
| 50 | 41  | 59  | 144 | 169 | 138 | 160 | 127 | 158 | 81  |
| 30 | 29  | 31  | 32  | 55  | 51  | 44  | 29  | 32  | 33  |
| 54 | 40  | 48  | 73  | 129 | 110 | 81  | 87  | 99  | 76  |
| 28 | 49  | 41  | 129 | 144 | 140 | 132 | 90  | 120 | 65  |
| 22 | 23  | 34  | 54  | 73  | 59  | 48  | 39  | 38  | 38  |
| 26 | 28  | 17  | 71  | 85  | 72  | 75  | 72  | 72  | 54  |
| 48 | 62  | 62  | 202 | 255 | 230 | 168 | 188 | 191 | 99  |
| 31 | 40  | 49  | 59  | 74  | 65  | 56  | 56  | 56  | 44  |
| 60 | 57  | 53  | 80  | 102 | 96  | 93  | 101 | 95  | 75  |
| 27 | 31  | 33  | 62  | 73  | 60  | 86  | 91  | 75  | 45  |
| 26 | 24  | 19  | 84  | 118 | 113 | 136 | 109 | 107 | 40  |
| 38 | 35  | 34  | 66  | 61  | 71  | 69  | 54  | 61  | 52  |
| 47 | 37  | 41  | 57  | 58  | 55  | 68  | 58  | 65  | 51  |
| 42 | 39  | 53  | 248 | 285 | 285 | 298 | 250 | 287 | 108 |
| 44 | 27  | 32  | 35  | 53  | 48  | 48  | 38  | 49  | 30  |
| 62 | 66  | 74  | 137 | 214 | 172 | 175 | 196 | 151 | 85  |
| 15 | 13  | 21  | 39  | 50  | 40  | 44  | 28  | 37  | 21  |
| 27 | 49  | 55  | 64  | 61  | 74  | 80  | 77  | 79  | 66  |
| 26 | 31  | 36  | 57  | 88  | 63  | 92  | 83  | 86  | 49  |
| 40 | 40  | 53  | 94  | 129 | 98  | 91  | 89  | 84  | 58  |
| 49 | 50  | 70  | 104 | 143 | 124 | 101 | 90  | 115 | 66  |
| 29 | 24  | 29  | 33  | 41  | 45  | 40  | 28  | 34  | 23  |
| 57 | 54  | 75  | 211 | 322 | 256 | 319 | 218 | 288 | 119 |
| 38 | 29  | 32  | 124 | 168 | 132 | 198 | 200 | 233 | 69  |
| 52 | 41  | 51  | 161 | 218 | 203 | 264 | 209 | 224 | 94  |
| 64 | 87  | 85  | 100 | 175 | 134 | 163 | 106 | 109 | 98  |
| 44 | 59  | 65  | 69  | 90  | 62  | 67  | 81  | 85  | 66  |
| 42 | 43  | 43  | 35  | 43  | 47  | 60  | 75  | 56  | 33  |
| 39 | 58  | 44  | 72  | 98  | 85  | 105 | 87  | 99  | 68  |
| 40 | 41  | 46  | 105 | 121 | 126 | 84  | 69  | 93  | 65  |
| 47 | 49  | 38  | 347 | 357 | 324 | 461 | 458 | 499 | 212 |
| 17 | 17  | 16  | 29  | 35  | 29  | 38  | 22  | 25  | 6   |
| 81 | 85  | 87  | 330 | 396 | 351 | 406 | 438 | 475 | 185 |
| 30 | 36  | 27  | 34  | 63  | 41  | 46  | 35  | 41  | 34  |
| 93 | 102 | 115 | 177 | 256 | 203 | 240 | 200 | 232 | 142 |
| 43 | 46  | 63  | 103 | 126 | 101 | 68  | 95  | 97  | 52  |
| 65 | 70  | 64  | 216 | 281 | 281 | 275 | 209 | 244 | 133 |
| 98 | 95  | 113 | 153 | 176 | 186 | 134 | 102 | 117 | 103 |
| 44 | 39  | 40  | 53  | 78  | 65  | 112 | 70  | 84  | 43  |

|     |     |     |     |     |     |     |     |     |     |
|-----|-----|-----|-----|-----|-----|-----|-----|-----|-----|
| 27  | 48  | 40  | 48  | 77  | 57  | 67  | 68  | 59  | 40  |
| 20  | 27  | 29  | 88  | 100 | 103 | 83  | 75  | 84  | 53  |
| 82  | 87  | 93  | 85  | 110 | 99  | 97  | 84  | 79  | 62  |
| 38  | 43  | 39  | 77  | 96  | 91  | 97  | 71  | 81  | 51  |
| 114 | 115 | 119 | 230 | 283 | 254 | 351 | 321 | 349 | 178 |
| 12  | 15  | 19  | 9   | 7   | 7   | 5   | 13  | 7   | 12  |
| 32  | 25  | 31  | 245 | 394 | 263 | 301 | 231 | 280 | 102 |
| 19  | 23  | 33  | 32  | 47  | 30  | 35  | 34  | 28  | 31  |
| 56  | 66  | 66  | 75  | 104 | 88  | 94  | 90  | 111 | 63  |
| 38  | 45  | 58  | 78  | 95  | 64  | 81  | 48  | 61  | 51  |
| 29  | 31  | 39  | 111 | 149 | 128 | 128 | 96  | 113 | 58  |
| 54  | 43  | 60  | 108 | 128 | 124 | 115 | 94  | 112 | 60  |
| 36  | 54  | 47  | 145 | 156 | 130 | 186 | 161 | 182 | 83  |
| 17  | 16  | 21  | 95  | 125 | 92  | 102 | 82  | 100 | 45  |
| 43  | 53  | 51  | 189 | 243 | 184 | 192 | 210 | 179 | 97  |
| 25  | 18  | 32  | 102 | 135 | 104 | 72  | 69  | 70  | 41  |
| 26  | 48  | 33  | 72  | 77  | 73  | 88  | 75  | 81  | 44  |
| 39  | 49  | 78  | 86  | 117 | 114 | 102 | 99  | 113 | 62  |
| 10  | 8   | 9   | 43  | 34  | 31  | 30  | 26  | 34  | 15  |
| 32  | 20  | 29  | 20  | 26  | 26  | 33  | 24  | 37  | 30  |
| 39  | 46  | 47  | 47  | 60  | 67  | 80  | 72  | 71  | 59  |
| 48  | 73  | 51  | 270 | 365 | 307 | 311 | 288 | 300 | 139 |
| 12  | 21  | 30  | 36  | 57  | 54  | 43  | 31  | 45  | 32  |
| 41  | 41  | 47  | 228 | 260 | 242 | 300 | 267 | 300 | 152 |
| 28  | 30  | 34  | 83  | 115 | 81  | 110 | 98  | 96  | 58  |
| 22  | 14  | 22  | 51  | 87  | 77  | 112 | 85  | 82  | 42  |
| 40  | 31  | 35  | 57  | 68  | 76  | 55  | 49  | 49  | 40  |
| 43  | 52  | 45  | 71  | 70  | 71  | 61  | 73  | 62  | 54  |
| 43  | 42  | 46  | 176 | 264 | 195 | 172 | 153 | 183 | 87  |
| 9   | 9   | 10  | 6   | 11  | 11  | 7   | 9   | 7   | 11  |
| 56  | 56  | 66  | 79  | 120 | 106 | 77  | 64  | 88  | 64  |
| 43  | 32  | 36  | 103 | 151 | 129 | 76  | 68  | 77  | 45  |
| 20  | 24  | 22  | 32  | 48  | 53  | 32  | 32  | 39  | 31  |
| 17  | 22  | 13  | 33  | 56  | 35  | 27  | 27  | 23  | 21  |
| 13  | 37  | 25  | 37  | 57  | 43  | 61  | 50  | 66  | 36  |
| 42  | 50  | 48  | 30  | 43  | 45  | 32  | 26  | 33  | 31  |
| 17  | 25  | 32  | 39  | 57  | 49  | 30  | 29  | 32  | 17  |
| 35  | 41  | 42  | 38  | 60  | 41  | 43  | 53  | 53  | 44  |
| 19  | 32  | 24  | 18  | 34  | 25  | 36  | 28  | 26  | 28  |
| 71  | 60  | 67  | 228 | 325 | 235 | 271 | 253 | 289 | 120 |
| 43  | 45  | 49  | 363 | 458 | 337 | 334 | 289 | 357 | 153 |



|    |    |     |     |     |     |     |     |     |     |
|----|----|-----|-----|-----|-----|-----|-----|-----|-----|
| 28 | 33 | 42  | 62  | 113 | 88  | 83  | 87  | 83  | 46  |
| 20 | 30 | 29  | 59  | 75  | 65  | 48  | 68  | 63  | 29  |
| 25 | 44 | 45  | 86  | 80  | 83  | 90  | 76  | 108 | 65  |
| 19 | 17 | 13  | 10  | 20  | 18  | 21  | 28  | 28  | 21  |
| 28 | 27 | 29  | 67  | 77  | 97  | 86  | 91  | 94  | 42  |
| 63 | 51 | 62  | 171 | 196 | 171 | 176 | 166 | 180 | 78  |
| 60 | 61 | 46  | 115 | 127 | 126 | 139 | 129 | 127 | 73  |
| 42 | 62 | 42  | 128 | 137 | 154 | 89  | 70  | 84  | 56  |
| 31 | 37 | 45  | 81  | 84  | 73  | 72  | 102 | 93  | 50  |
| 31 | 28 | 39  | 96  | 108 | 96  | 102 | 84  | 78  | 46  |
| 80 | 68 | 73  | 98  | 119 | 119 | 114 | 141 | 142 | 75  |
| 36 | 31 | 30  | 39  | 47  | 43  | 49  | 47  | 63  | 39  |
| 19 | 21 | 20  | 22  | 22  | 24  | 19  | 30  | 24  | 11  |
| 19 | 18 | 22  | 37  | 51  | 49  | 50  | 44  | 28  | 39  |
| 31 | 36 | 27  | 71  | 108 | 98  | 104 | 95  | 122 | 51  |
| 17 | 19 | 23  | 27  | 32  | 37  | 36  | 40  | 32  | 25  |
| 40 | 37 | 56  | 69  | 87  | 63  | 90  | 85  | 99  | 50  |
| 44 | 49 | 50  | 156 | 196 | 200 | 205 | 193 | 211 | 89  |
| 34 | 41 | 44  | 199 | 289 | 223 | 349 | 249 | 282 | 125 |
| 33 | 39 | 54  | 104 | 102 | 122 | 74  | 85  | 86  | 44  |
| 22 | 24 | 38  | 32  | 36  | 50  | 68  | 41  | 56  | 29  |
| 83 | 85 | 107 | 153 | 222 | 226 | 176 | 165 | 204 | 127 |
| 55 | 38 | 58  | 75  | 85  | 91  | 58  | 58  | 70  | 46  |
| 53 | 43 | 49  | 166 | 244 | 182 | 202 | 176 | 189 | 92  |
| 71 | 61 | 55  | 81  | 102 | 78  | 115 | 105 | 101 | 73  |
| 49 | 44 | 76  | 103 | 136 | 110 | 114 | 125 | 127 | 66  |
| 55 | 41 | 39  | 168 | 222 | 178 | 299 | 287 | 302 | 151 |
| 29 | 33 | 39  | 93  | 114 | 80  | 73  | 58  | 66  | 47  |
| 41 | 39 | 42  | 310 | 461 | 343 | 338 | 319 | 341 | 145 |
| 40 | 39 | 62  | 134 | 195 | 167 | 174 | 162 | 209 | 94  |
| 43 | 40 | 56  | 129 | 159 | 127 | 137 | 129 | 123 | 64  |
| 28 | 33 | 41  | 39  | 77  | 62  | 40  | 50  | 54  | 30  |
| 68 | 73 | 75  | 132 | 214 | 175 | 186 | 132 | 173 | 80  |
| 31 | 42 | 61  | 396 | 525 | 422 | 508 | 434 | 511 | 200 |
| 23 | 16 | 31  | 86  | 69  | 76  | 87  | 66  | 73  | 37  |
| 38 | 57 | 72  | 173 | 238 | 178 | 255 | 205 | 265 | 122 |
| 17 | 30 | 23  | 22  | 30  | 34  | 55  | 37  | 42  | 27  |
| 71 | 62 | 63  | 264 | 337 | 270 | 363 | 323 | 390 | 163 |
| 67 | 60 | 58  | 85  | 121 | 120 | 192 | 162 | 175 | 89  |
| 35 | 42 | 34  | 50  | 61  | 55  | 56  | 48  | 68  | 40  |
| 1  | 2  | 6   | 35  | 63  | 35  | 30  | 23  | 28  | 7   |

|     |     |     |     |     |     |     |     |     |     |
|-----|-----|-----|-----|-----|-----|-----|-----|-----|-----|
| 7   | 8   | 14  | 12  | 20  | 13  | 13  | 15  | 13  | 20  |
| 40  | 48  | 43  | 162 | 178 | 189 | 270 | 257 | 302 | 122 |
| 27  | 26  | 28  | 231 | 334 | 260 | 390 | 292 | 370 | 215 |
| 67  | 42  | 62  | 98  | 106 | 95  | 138 | 135 | 162 | 71  |
| 3   | 3   | 4   | 4   | 9   | 4   | 2   | 0   | 6   | 1   |
| 28  | 22  | 27  | 64  | 64  | 71  | 60  | 51  | 51  | 40  |
| 30  | 39  | 41  | 122 | 172 | 130 | 149 | 144 | 159 | 78  |
| 16  | 19  | 16  | 13  | 23  | 35  | 24  | 29  | 22  | 23  |
| 29  | 31  | 38  | 71  | 77  | 69  | 82  | 94  | 91  | 48  |
| 72  | 48  | 67  | 63  | 76  | 46  | 67  | 56  | 63  | 49  |
| 64  | 56  | 63  | 142 | 177 | 120 | 158 | 127 | 167 | 77  |
| 31  | 40  | 41  | 96  | 130 | 114 | 154 | 119 | 150 | 80  |
| 41  | 32  | 34  | 110 | 117 | 79  | 63  | 57  | 74  | 51  |
| 56  | 46  | 49  | 94  | 115 | 106 | 120 | 109 | 146 | 67  |
| 81  | 61  | 89  | 64  | 81  | 69  | 97  | 89  | 90  | 57  |
| 45  | 55  | 58  | 79  | 102 | 87  | 68  | 67  | 82  | 35  |
| 46  | 50  | 36  | 79  | 92  | 73  | 71  | 74  | 77  | 46  |
| 54  | 51  | 44  | 346 | 505 | 391 | 505 | 414 | 438 | 207 |
| 35  | 38  | 52  | 63  | 89  | 92  | 99  | 80  | 103 | 48  |
| 23  | 33  | 28  | 133 | 175 | 183 | 131 | 131 | 148 | 57  |
| 40  | 50  | 42  | 65  | 100 | 66  | 88  | 87  | 96  | 53  |
| 21  | 25  | 29  | 106 | 146 | 93  | 86  | 68  | 95  | 47  |
| 27  | 36  | 47  | 111 | 125 | 108 | 130 | 118 | 114 | 56  |
| 77  | 72  | 72  | 637 | 836 | 606 | 748 | 603 | 772 | 279 |
| 35  | 28  | 39  | 209 | 274 | 225 | 197 | 209 | 208 | 96  |
| 48  | 55  | 58  | 78  | 100 | 112 | 186 | 152 | 183 | 93  |
| 23  | 33  | 31  | 54  | 90  | 63  | 57  | 65  | 64  | 42  |
| 36  | 31  | 28  | 97  | 127 | 104 | 71  | 79  | 72  | 32  |
| 26  | 25  | 27  | 96  | 116 | 103 | 117 | 105 | 119 | 66  |
| 119 | 136 | 141 | 222 | 313 | 249 | 346 | 355 | 383 | 164 |
| 52  | 69  | 71  | 109 | 149 | 125 | 110 | 124 | 100 | 61  |
| 19  | 19  | 9   | 42  | 58  | 46  | 44  | 25  | 31  | 22  |
| 41  | 31  | 30  | 177 | 205 | 193 | 180 | 172 | 186 | 72  |
| 30  | 39  | 38  | 67  | 83  | 93  | 81  | 77  | 81  | 47  |
| 32  | 16  | 21  | 60  | 64  | 63  | 53  | 30  | 43  | 21  |
| 22  | 36  | 33  | 77  | 78  | 54  | 43  | 49  | 59  | 47  |
| 30  | 41  | 36  | 82  | 148 | 117 | 93  | 76  | 77  | 49  |
| 15  | 19  | 27  | 20  | 16  | 19  | 25  | 23  | 24  | 21  |
| 11  | 9   | 12  | 38  | 35  | 33  | 23  | 25  | 26  | 17  |
| 39  | 43  | 44  | 34  | 31  | 44  | 52  | 45  | 55  | 38  |
| 13  | 29  | 19  | 30  | 52  | 32  | 34  | 27  | 23  | 20  |

|    |    |     |     |     |     |     |     |     |     |
|----|----|-----|-----|-----|-----|-----|-----|-----|-----|
| 45 | 31 | 36  | 27  | 47  | 36  | 34  | 30  | 35  | 31  |
| 29 | 34 | 41  | 15  | 21  | 20  | 23  | 25  | 33  | 25  |
| 52 | 31 | 41  | 228 | 321 | 237 | 279 | 252 | 270 | 98  |
| 36 | 35 | 38  | 28  | 38  | 33  | 54  | 41  | 48  | 32  |
| 14 | 18 | 12  | 68  | 88  | 69  | 49  | 44  | 55  | 26  |
| 34 | 42 | 27  | 39  | 62  | 51  | 68  | 55  | 66  | 33  |
| 27 | 31 | 38  | 39  | 35  | 43  | 32  | 37  | 41  | 29  |
| 63 | 58 | 64  | 99  | 152 | 127 | 123 | 107 | 114 | 79  |
| 14 | 14 | 21  | 84  | 114 | 73  | 44  | 43  | 51  | 15  |
| 40 | 35 | 29  | 59  | 79  | 71  | 70  | 84  | 73  | 43  |
| 28 | 27 | 33  | 62  | 74  | 53  | 53  | 58  | 80  | 34  |
| 48 | 54 | 55  | 167 | 206 | 172 | 146 | 128 | 166 | 76  |
| 40 | 43 | 40  | 94  | 117 | 85  | 105 | 94  | 94  | 55  |
| 87 | 89 | 106 | 177 | 271 | 204 | 252 | 235 | 256 | 134 |
| 29 | 34 | 38  | 70  | 69  | 52  | 66  | 55  | 62  | 22  |
| 14 | 10 | 21  | 19  | 27  | 20  | 16  | 20  | 16  | 27  |
| 21 | 27 | 29  | 34  | 57  | 58  | 48  | 32  | 36  | 24  |
| 35 | 32 | 39  | 67  | 62  | 58  | 50  | 55  | 48  | 34  |
| 0  | 0  | 0   | 1   | 0   | 2   | 0   | 0   | 0   | 3   |
| 40 | 40 | 49  | 39  | 53  | 51  | 60  | 52  | 66  | 33  |
| 40 | 49 | 49  | 63  | 121 | 89  | 102 | 87  | 118 | 64  |
| 22 | 21 | 32  | 193 | 226 | 184 | 103 | 106 | 103 | 32  |
| 24 | 24 | 20  | 52  | 52  | 59  | 46  | 69  | 52  | 23  |
| 47 | 51 | 64  | 85  | 130 | 110 | 166 | 124 | 152 | 86  |
| 44 | 42 | 56  | 86  | 108 | 76  | 65  | 58  | 76  | 45  |
| 25 | 17 | 27  | 47  | 73  | 62  | 67  | 43  | 63  | 36  |
| 28 | 35 | 46  | 61  | 61  | 47  | 42  | 43  | 56  | 39  |
| 52 | 59 | 67  | 98  | 104 | 100 | 84  | 84  | 96  | 65  |
| 7  | 7  | 8   | 51  | 66  | 48  | 46  | 26  | 29  | 19  |
| 43 | 53 | 52  | 142 | 137 | 109 | 108 | 110 | 99  | 75  |
| 43 | 51 | 55  | 137 | 130 | 134 | 165 | 163 | 148 | 85  |
| 4  | 14 | 14  | 5   | 3   | 7   | 6   | 4   | 7   | 11  |
| 41 | 55 | 45  | 129 | 140 | 126 | 118 | 105 | 119 | 62  |
| 22 | 23 | 36  | 37  | 48  | 52  | 58  | 52  | 50  | 31  |
| 18 | 21 | 40  | 65  | 62  | 54  | 94  | 97  | 100 | 37  |
| 41 | 28 | 58  | 72  | 84  | 67  | 77  | 97  | 99  | 52  |
| 53 | 57 | 63  | 57  | 69  | 65  | 47  | 53  | 56  | 51  |
| 61 | 47 | 62  | 89  | 116 | 89  | 115 | 93  | 95  | 68  |
| 11 | 8  | 9   | 29  | 41  | 33  | 23  | 16  | 25  | 8   |
| 26 | 23 | 33  | 102 | 157 | 141 | 141 | 86  | 124 | 63  |
| 71 | 51 | 73  | 95  | 123 | 80  | 75  | 79  | 100 | 68  |

|     |     |     |     |     |     |     |     |     |     |
|-----|-----|-----|-----|-----|-----|-----|-----|-----|-----|
| 24  | 28  | 30  | 41  | 54  | 43  | 59  | 51  | 72  | 33  |
| 66  | 68  | 86  | 49  | 62  | 48  | 54  | 59  | 75  | 78  |
| 22  | 37  | 21  | 28  | 44  | 30  | 31  | 23  | 28  | 24  |
| 48  | 71  | 71  | 65  | 85  | 71  | 80  | 81  | 75  | 73  |
| 25  | 19  | 18  | 20  | 19  | 10  | 16  | 19  | 24  | 13  |
| 64  | 60  | 73  | 177 | 249 | 222 | 326 | 225 | 287 | 145 |
| 32  | 32  | 35  | 51  | 67  | 49  | 56  | 38  | 51  | 43  |
| 6   | 21  | 11  | 10  | 12  | 24  | 18  | 18  | 4   | 18  |
| 36  | 29  | 36  | 280 | 387 | 279 | 338 | 277 | 336 | 145 |
| 28  | 24  | 35  | 52  | 61  | 57  | 27  | 27  | 49  | 31  |
| 34  | 23  | 38  | 92  | 120 | 119 | 143 | 94  | 126 | 65  |
| 7   | 16  | 9   | 27  | 38  | 38  | 31  | 29  | 22  | 8   |
| 13  | 11  | 14  | 34  | 41  | 19  | 21  | 25  | 21  | 14  |
| 68  | 54  | 63  | 77  | 99  | 76  | 108 | 80  | 114 | 79  |
| 26  | 16  | 19  | 81  | 99  | 91  | 104 | 78  | 71  | 24  |
| 17  | 21  | 19  | 93  | 122 | 110 | 65  | 56  | 67  | 37  |
| 29  | 40  | 43  | 220 | 277 | 226 | 348 | 261 | 298 | 147 |
| 28  | 34  | 33  | 66  | 93  | 85  | 56  | 55  | 58  | 31  |
| 41  | 28  | 49  | 84  | 111 | 110 | 102 | 82  | 96  | 45  |
| 52  | 42  | 57  | 63  | 99  | 83  | 69  | 68  | 75  | 45  |
| 63  | 48  | 54  | 97  | 103 | 94  | 115 | 91  | 117 | 68  |
| 49  | 48  | 50  | 81  | 90  | 83  | 78  | 56  | 75  | 52  |
| 33  | 26  | 32  | 55  | 59  | 56  | 85  | 81  | 85  | 37  |
| 49  | 54  | 53  | 48  | 65  | 53  | 73  | 67  | 62  | 52  |
| 25  | 17  | 37  | 73  | 103 | 62  | 99  | 68  | 80  | 36  |
| 42  | 50  | 48  | 56  | 72  | 70  | 69  | 53  | 75  | 44  |
| 53  | 47  | 57  | 65  | 88  | 73  | 96  | 89  | 101 | 60  |
| 63  | 52  | 65  | 65  | 96  | 76  | 66  | 65  | 85  | 53  |
| 20  | 16  | 21  | 152 | 201 | 125 | 80  | 76  | 83  | 36  |
| 21  | 26  | 24  | 106 | 163 | 114 | 125 | 75  | 97  | 52  |
| 63  | 49  | 71  | 245 | 305 | 263 | 335 | 307 | 343 | 146 |
| 81  | 87  | 130 | 128 | 155 | 144 | 182 | 133 | 167 | 87  |
| 46  | 56  | 45  | 247 | 348 | 305 | 437 | 359 | 391 | 204 |
| 10  | 12  | 9   | 16  | 20  | 16  | 18  | 17  | 20  | 9   |
| 46  | 51  | 58  | 157 | 217 | 181 | 253 | 203 | 247 | 113 |
| 25  | 17  | 25  | 73  | 80  | 69  | 56  | 52  | 78  | 39  |
| 42  | 27  | 15  | 65  | 80  | 66  | 77  | 76  | 83  | 39  |
| 112 | 115 | 128 | 247 | 287 | 266 | 372 | 350 | 354 | 175 |
| 29  | 43  | 47  | 28  | 53  | 51  | 39  | 47  | 43  | 40  |
| 43  | 38  | 47  | 57  | 81  | 49  | 67  | 59  | 77  | 46  |
| 9   | 19  | 9   | 36  | 42  | 42  | 32  | 19  | 24  | 15  |

|     |     |     |     |     |     |     |     |     |     |
|-----|-----|-----|-----|-----|-----|-----|-----|-----|-----|
| 72  | 80  | 100 | 126 | 174 | 151 | 156 | 156 | 156 | 82  |
| 81  | 68  | 72  | 102 | 117 | 93  | 120 | 84  | 106 | 83  |
| 10  | 5   | 10  | 11  | 12  | 4   | 11  | 5   | 16  | 8   |
| 19  | 27  | 39  | 42  | 57  | 65  | 61  | 77  | 73  | 39  |
| 53  | 46  | 39  | 52  | 56  | 63  | 82  | 79  | 64  | 59  |
| 26  | 16  | 21  | 37  | 38  | 18  | 25  | 25  | 27  | 23  |
| 8   | 5   | 8   | 17  | 41  | 31  | 20  | 34  | 26  | 11  |
| 39  | 38  | 40  | 127 | 135 | 123 | 142 | 115 | 122 | 56  |
| 31  | 27  | 30  | 39  | 49  | 45  | 44  | 53  | 40  | 36  |
| 19  | 34  | 32  | 102 | 157 | 136 | 123 | 87  | 126 | 49  |
| 10  | 12  | 11  | 39  | 67  | 47  | 29  | 21  | 30  | 8   |
| 21  | 21  | 34  | 66  | 112 | 82  | 65  | 44  | 64  | 31  |
| 46  | 46  | 64  | 53  | 97  | 71  | 96  | 74  | 81  | 57  |
| 32  | 41  | 40  | 93  | 99  | 81  | 121 | 96  | 102 | 53  |
| 78  | 80  | 80  | 162 | 226 | 181 | 184 | 158 | 178 | 99  |
| 27  | 38  | 43  | 141 | 189 | 160 | 227 | 212 | 246 | 107 |
| 28  | 30  | 18  | 47  | 51  | 37  | 32  | 28  | 46  | 29  |
| 47  | 35  | 41  | 77  | 113 | 72  | 76  | 71  | 68  | 55  |
| 32  | 39  | 42  | 38  | 51  | 41  | 43  | 34  | 41  | 39  |
| 37  | 28  | 36  | 103 | 114 | 91  | 101 | 77  | 83  | 37  |
| 56  | 52  | 64  | 93  | 132 | 109 | 76  | 55  | 67  | 50  |
| 21  | 37  | 30  | 21  | 25  | 26  | 33  | 16  | 29  | 27  |
| 69  | 53  | 77  | 124 | 176 | 123 | 165 | 153 | 167 | 89  |
| 48  | 44  | 32  | 26  | 43  | 38  | 51  | 32  | 33  | 40  |
| 60  | 58  | 68  | 88  | 130 | 90  | 112 | 99  | 97  | 55  |
| 34  | 46  | 42  | 91  | 113 | 97  | 130 | 122 | 113 | 62  |
| 24  | 18  | 22  | 122 | 168 | 152 | 144 | 113 | 142 | 55  |
| 34  | 56  | 59  | 59  | 68  | 74  | 45  | 56  | 43  | 33  |
| 29  | 45  | 38  | 345 | 443 | 356 | 398 | 314 | 366 | 127 |
| 104 | 114 | 104 | 164 | 224 | 178 | 189 | 185 | 233 | 112 |
| 15  | 8   | 6   | 18  | 21  | 22  | 29  | 33  | 25  | 16  |
| 63  | 53  | 58  | 87  | 101 | 110 | 116 | 96  | 148 | 71  |
| 55  | 49  | 53  | 138 | 202 | 179 | 179 | 135 | 168 | 89  |
| 50  | 37  | 59  | 72  | 82  | 91  | 79  | 81  | 80  | 68  |
| 43  | 30  | 46  | 240 | 278 | 270 | 243 | 221 | 235 | 104 |
| 39  | 38  | 29  | 70  | 67  | 87  | 56  | 62  | 91  | 36  |
| 37  | 47  | 40  | 69  | 79  | 85  | 108 | 84  | 83  | 61  |
| 71  | 68  | 65  | 93  | 128 | 94  | 138 | 121 | 124 | 79  |
| 60  | 69  | 75  | 89  | 111 | 89  | 107 | 92  | 132 | 57  |
| 37  | 39  | 46  | 68  | 80  | 57  | 63  | 46  | 62  | 46  |
| 14  | 21  | 23  | 20  | 25  | 16  | 28  | 27  | 40  | 22  |

|    |    |    |     |     |     |     |     |     |     |
|----|----|----|-----|-----|-----|-----|-----|-----|-----|
| 31 | 23 | 34 | 53  | 101 | 90  | 77  | 84  | 89  | 53  |
| 60 | 47 | 60 | 46  | 67  | 57  | 67  | 67  | 71  | 68  |
| 25 | 26 | 30 | 54  | 56  | 40  | 50  | 30  | 50  | 37  |
| 34 | 25 | 40 | 29  | 34  | 15  | 41  | 29  | 34  | 27  |
| 41 | 34 | 40 | 83  | 93  | 84  | 82  | 68  | 76  | 49  |
| 33 | 26 | 19 | 155 | 212 | 168 | 238 | 248 | 221 | 96  |
| 44 | 47 | 60 | 170 | 193 | 181 | 205 | 206 | 197 | 87  |
| 5  | 8  | 5  | 9   | 21  | 10  | 11  | 9   | 7   | 2   |
| 52 | 45 | 55 | 177 | 253 | 199 | 207 | 158 | 166 | 106 |
| 53 | 56 | 47 | 64  | 72  | 61  | 60  | 54  | 65  | 45  |
| 75 | 57 | 72 | 150 | 146 | 156 | 177 | 159 | 172 | 77  |
| 26 | 34 | 49 | 37  | 57  | 40  | 47  | 33  | 37  | 41  |
| 39 | 36 | 23 | 131 | 162 | 160 | 123 | 135 | 109 | 55  |
| 30 | 20 | 30 | 48  | 58  | 49  | 46  | 32  | 34  | 19  |
| 58 | 55 | 64 | 135 | 171 | 121 | 200 | 164 | 173 | 110 |
| 44 | 38 | 45 | 96  | 116 | 118 | 128 | 123 | 118 | 63  |
| 50 | 45 | 43 | 94  | 133 | 115 | 102 | 94  | 103 | 71  |
| 52 | 61 | 77 | 81  | 100 | 67  | 84  | 91  | 97  | 64  |
| 34 | 41 | 34 | 51  | 67  | 61  | 53  | 44  | 53  | 32  |
| 66 | 56 | 57 | 301 | 413 | 382 | 305 | 281 | 318 | 122 |
| 38 | 34 | 38 | 126 | 166 | 141 | 94  | 86  | 123 | 69  |
| 35 | 32 | 32 | 146 | 176 | 176 | 133 | 121 | 105 | 60  |
| 45 | 44 | 60 | 47  | 69  | 45  | 41  | 34  | 27  | 27  |
| 53 | 57 | 68 | 423 | 629 | 490 | 672 | 541 | 653 | 269 |
| 40 | 41 | 48 | 133 | 137 | 160 | 112 | 110 | 118 | 62  |
| 50 | 48 | 45 | 138 | 143 | 141 | 78  | 72  | 54  | 42  |
| 45 | 51 | 39 | 61  | 63  | 53  | 44  | 37  | 37  | 41  |
| 33 | 27 | 34 | 30  | 29  | 33  | 27  | 33  | 37  | 36  |
| 11 | 15 | 21 | 85  | 83  | 97  | 50  | 31  | 42  | 27  |
| 33 | 32 | 38 | 50  | 85  | 57  | 53  | 51  | 44  | 36  |
| 61 | 51 | 84 | 125 | 131 | 136 | 127 | 104 | 120 | 68  |
| 55 | 43 | 53 | 192 | 278 | 242 | 214 | 201 | 202 | 100 |
| 28 | 34 | 46 | 234 | 272 | 250 | 206 | 183 | 196 | 102 |
| 38 | 34 | 50 | 80  | 122 | 103 | 119 | 103 | 112 | 54  |
| 6  | 13 | 9  | 50  | 60  | 42  | 18  | 19  | 23  | 11  |
| 25 | 21 | 18 | 33  | 41  | 44  | 40  | 52  | 47  | 24  |
| 73 | 64 | 78 | 154 | 171 | 177 | 231 | 221 | 247 | 105 |
| 39 | 32 | 34 | 87  | 101 | 90  | 126 | 111 | 103 | 70  |
| 50 | 58 | 64 | 91  | 132 | 113 | 95  | 103 | 125 | 72  |
| 52 | 55 | 57 | 51  | 62  | 67  | 72  | 85  | 93  | 65  |
| 43 | 40 | 52 | 116 | 149 | 133 | 142 | 132 | 123 | 67  |

|     |     |     |     |     |     |      |      |      |     |
|-----|-----|-----|-----|-----|-----|------|------|------|-----|
| 51  | 52  | 57  | 190 | 278 | 245 | 270  | 261  | 308  | 101 |
| 36  | 40  | 40  | 39  | 46  | 42  | 40   | 33   | 41   | 34  |
| 39  | 37  | 49  | 158 | 160 | 147 | 108  | 96   | 98   | 44  |
| 54  | 57  | 64  | 149 | 184 | 146 | 162  | 114  | 123  | 74  |
| 35  | 36  | 30  | 36  | 56  | 49  | 62   | 51   | 49   | 24  |
| 45  | 64  | 53  | 254 | 378 | 310 | 361  | 351  | 341  | 145 |
| 33  | 50  | 33  | 73  | 85  | 73  | 57   | 35   | 41   | 35  |
| 23  | 27  | 25  | 58  | 97  | 100 | 138  | 121  | 153  | 63  |
| 31  | 34  | 36  | 103 | 103 | 90  | 149  | 110  | 123  | 53  |
| 22  | 14  | 16  | 24  | 21  | 22  | 23   | 37   | 37   | 23  |
| 10  | 18  | 19  | 6   | 8   | 4   | 16   | 10   | 15   | 11  |
| 20  | 33  | 28  | 85  | 100 | 81  | 83   | 78   | 70   | 55  |
| 53  | 50  | 58  | 88  | 125 | 76  | 147  | 129  | 137  | 68  |
| 85  | 90  | 105 | 169 | 199 | 168 | 206  | 211  | 224  | 114 |
| 38  | 45  | 52  | 102 | 157 | 122 | 201  | 155  | 183  | 78  |
| 32  | 22  | 23  | 38  | 38  | 40  | 79   | 60   | 65   | 27  |
| 36  | 37  | 25  | 12  | 9   | 11  | 16   | 8    | 10   | 21  |
| 50  | 46  | 54  | 201 | 292 | 226 | 223  | 240  | 247  | 121 |
| 63  | 62  | 76  | 122 | 146 | 123 | 122  | 103  | 125  | 79  |
| 54  | 62  | 35  | 157 | 198 | 199 | 169  | 163  | 175  | 101 |
| 34  | 47  | 51  | 123 | 186 | 134 | 154  | 114  | 128  | 90  |
| 32  | 28  | 31  | 111 | 147 | 114 | 101  | 85   | 96   | 53  |
| 47  | 49  | 39  | 72  | 101 | 78  | 61   | 61   | 78   | 49  |
| 60  | 44  | 46  | 267 | 304 | 275 | 285  | 256  | 251  | 130 |
| 64  | 53  | 58  | 145 | 189 | 168 | 112  | 86   | 116  | 73  |
| 64  | 74  | 73  | 147 | 162 | 161 | 173  | 157  | 169  | 90  |
| 25  | 43  | 44  | 100 | 131 | 105 | 150  | 153  | 161  | 76  |
| 44  | 34  | 39  | 32  | 48  | 48  | 53   | 41   | 54   | 39  |
| 36  | 36  | 38  | 51  | 71  | 57  | 88   | 71   | 77   | 45  |
| 50  | 60  | 39  | 135 | 176 | 173 | 164  | 118  | 140  | 69  |
| 11  | 35  | 18  | 9   | 10  | 18  | 24   | 19   | 19   | 24  |
| 34  | 41  | 49  | 181 | 278 | 195 | 202  | 216  | 228  | 95  |
| 33  | 22  | 32  | 37  | 48  | 48  | 49   | 57   | 48   | 34  |
| 29  | 23  | 33  | 43  | 62  | 57  | 56   | 52   | 68   | 30  |
| 24  | 21  | 22  | 85  | 112 | 101 | 117  | 98   | 143  | 50  |
| 47  | 54  | 63  | 63  | 74  | 61  | 47   | 67   | 72   | 58  |
| 18  | 10  | 24  | 23  | 21  | 19  | 12   | 19   | 17   | 7   |
| 41  | 56  | 56  | 63  | 107 | 78  | 131  | 140  | 117  | 71  |
| 30  | 34  | 35  | 42  | 66  | 63  | 68   | 55   | 73   | 26  |
| 163 | 148 | 196 | 765 | 913 | 773 | 1314 | 1132 | 1276 | 705 |
| 27  | 37  | 32  | 60  | 83  | 82  | 59   | 57   | 52   | 33  |

|     |     |     |     |     |     |     |     |     |     |
|-----|-----|-----|-----|-----|-----|-----|-----|-----|-----|
| 51  | 47  | 48  | 331 | 419 | 351 | 370 | 303 | 317 | 150 |
| 26  | 27  | 31  | 293 | 275 | 260 | 243 | 221 | 256 | 92  |
| 27  | 40  | 49  | 51  | 61  | 58  | 66  | 53  | 40  | 42  |
| 82  | 85  | 83  | 294 | 353 | 352 | 384 | 342 | 350 | 152 |
| 61  | 79  | 81  | 309 | 381 | 346 | 388 | 356 | 362 | 200 |
| 36  | 41  | 33  | 101 | 155 | 99  | 95  | 101 | 79  | 59  |
| 21  | 19  | 21  | 61  | 71  | 54  | 43  | 36  | 35  | 17  |
| 34  | 29  | 27  | 43  | 54  | 39  | 43  | 42  | 49  | 31  |
| 72  | 54  | 74  | 101 | 142 | 134 | 131 | 110 | 136 | 82  |
| 26  | 34  | 31  | 40  | 51  | 49  | 44  | 41  | 45  | 24  |
| 65  | 72  | 73  | 110 | 163 | 139 | 150 | 161 | 171 | 115 |
| 45  | 33  | 35  | 75  | 104 | 98  | 98  | 69  | 85  | 55  |
| 40  | 37  | 33  | 78  | 88  | 89  | 88  | 100 | 90  | 57  |
| 36  | 42  | 33  | 126 | 182 | 146 | 135 | 167 | 153 | 78  |
| 50  | 59  | 54  | 132 | 141 | 156 | 179 | 186 | 191 | 80  |
| 104 | 114 | 105 | 143 | 207 | 184 | 264 | 253 | 237 | 143 |
| 114 | 96  | 123 | 150 | 201 | 172 | 146 | 135 | 143 | 80  |
| 31  | 28  | 30  | 46  | 74  | 62  | 68  | 56  | 84  | 40  |
| 6   | 5   | 9   | 6   | 14  | 4   | 7   | 10  | 6   | 3   |
| 33  | 42  | 36  | 67  | 92  | 66  | 99  | 89  | 114 | 50  |
| 31  | 37  | 40  | 294 | 413 | 318 | 321 | 285 | 334 | 122 |
| 48  | 54  | 55  | 92  | 117 | 84  | 111 | 98  | 118 | 73  |
| 69  | 65  | 60  | 69  | 100 | 84  | 79  | 63  | 71  | 42  |
| 27  | 30  | 32  | 157 | 218 | 195 | 258 | 200 | 239 | 89  |
| 44  | 41  | 50  | 47  | 42  | 52  | 66  | 66  | 45  | 53  |
| 22  | 31  | 50  | 82  | 67  | 87  | 47  | 42  | 38  | 21  |
| 56  | 44  | 71  | 186 | 210 | 189 | 221 | 222 | 237 | 98  |
| 28  | 33  | 27  | 133 | 158 | 140 | 186 | 138 | 162 | 64  |
| 53  | 66  | 65  | 142 | 161 | 146 | 175 | 160 | 174 | 89  |
| 24  | 19  | 28  | 45  | 71  | 53  | 38  | 48  | 54  | 37  |
| 40  | 54  | 54  | 262 | 335 | 284 | 207 | 190 | 227 | 85  |
| 18  | 13  | 19  | 107 | 122 | 99  | 115 | 109 | 130 | 44  |
| 27  | 29  | 52  | 125 | 145 | 127 | 201 | 169 | 205 | 92  |
| 28  | 37  | 49  | 40  | 43  | 63  | 58  | 42  | 52  | 43  |
| 42  | 52  | 55  | 114 | 141 | 116 | 188 | 156 | 191 | 104 |
| 73  | 68  | 70  | 84  | 112 | 78  | 122 | 112 | 106 | 77  |
| 62  | 69  | 57  | 62  | 74  | 58  | 73  | 81  | 74  | 56  |
| 20  | 48  | 32  | 100 | 84  | 81  | 132 | 113 | 118 | 69  |
| 56  | 70  | 67  | 101 | 125 | 96  | 140 | 111 | 135 | 76  |
| 39  | 30  | 38  | 166 | 213 | 174 | 198 | 197 | 227 | 76  |
| 65  | 68  | 51  | 249 | 340 | 249 | 263 | 203 | 245 | 117 |



|     |    |     |     |     |     |     |     |     |     |
|-----|----|-----|-----|-----|-----|-----|-----|-----|-----|
| 63  | 71 | 65  | 122 | 202 | 168 | 145 | 143 | 190 | 105 |
| 34  | 29 | 36  | 103 | 119 | 109 | 94  | 77  | 101 | 45  |
| 59  | 67 | 66  | 199 | 249 | 199 | 239 | 207 | 213 | 128 |
| 27  | 25 | 32  | 85  | 87  | 74  | 59  | 66  | 66  | 40  |
| 1   | 9  | 4   | 8   | 12  | 4   | 11  | 6   | 5   | 6   |
| 55  | 52 | 68  | 76  | 95  | 88  | 47  | 68  | 59  | 48  |
| 37  | 35 | 43  | 206 | 256 | 217 | 217 | 160 | 196 | 86  |
| 46  | 46 | 40  | 124 | 127 | 124 | 104 | 118 | 97  | 82  |
| 30  | 37 | 40  | 54  | 54  | 65  | 83  | 53  | 65  | 54  |
| 24  | 41 | 49  | 85  | 98  | 126 | 108 | 124 | 99  | 61  |
| 51  | 55 | 62  | 256 | 302 | 292 | 371 | 335 | 354 | 164 |
| 58  | 61 | 81  | 103 | 120 | 106 | 188 | 132 | 164 | 83  |
| 102 | 89 | 112 | 69  | 83  | 71  | 101 | 134 | 144 | 112 |
| 46  | 35 | 43  | 40  | 73  | 55  | 45  | 51  | 81  | 39  |
| 43  | 39 | 45  | 93  | 130 | 108 | 121 | 128 | 151 | 68  |
| 30  | 29 | 34  | 44  | 70  | 52  | 72  | 69  | 66  | 35  |
| 17  | 16 | 19  | 51  | 66  | 58  | 44  | 36  | 53  | 27  |
| 63  | 41 | 71  | 156 | 207 | 212 | 147 | 104 | 150 | 88  |
| 48  | 51 | 48  | 99  | 134 | 117 | 146 | 116 | 135 | 67  |
| 42  | 45 | 45  | 94  | 122 | 123 | 111 | 92  | 101 | 52  |
| 24  | 28 | 25  | 54  | 73  | 66  | 57  | 53  | 51  | 30  |
| 53  | 53 | 61  | 200 | 234 | 209 | 271 | 227 | 270 | 126 |
| 81  | 75 | 79  | 98  | 137 | 98  | 132 | 120 | 126 | 90  |
| 20  | 19 | 41  | 255 | 380 | 280 | 336 | 296 | 291 | 155 |
| 43  | 37 | 49  | 183 | 231 | 176 | 191 | 161 | 192 | 100 |
| 73  | 65 | 73  | 96  | 167 | 139 | 141 | 134 | 128 | 95  |
| 23  | 24 | 30  | 32  | 40  | 42  | 39  | 31  | 47  | 25  |
| 11  | 12 | 15  | 6   | 3   | 3   | 8   | 7   | 3   | 10  |
| 62  | 62 | 74  | 215 | 323 | 258 | 268 | 264 | 279 | 155 |
| 45  | 58 | 43  | 74  | 94  | 84  | 88  | 75  | 64  | 38  |
| 44  | 51 | 56  | 88  | 107 | 73  | 69  | 59  | 81  | 43  |
| 15  | 12 | 19  | 92  | 115 | 123 | 146 | 110 | 106 | 53  |
| 44  | 39 | 47  | 74  | 89  | 69  | 76  | 75  | 82  | 44  |
| 19  | 22 | 31  | 313 | 407 | 325 | 441 | 403 | 409 | 191 |
| 43  | 47 | 51  | 69  | 96  | 87  | 64  | 63  | 58  | 44  |
| 43  | 41 | 47  | 80  | 73  | 83  | 86  | 86  | 66  | 54  |
| 40  | 55 | 41  | 40  | 49  | 37  | 50  | 53  | 59  | 44  |
| 62  | 74 | 76  | 97  | 97  | 102 | 113 | 105 | 124 | 63  |
| 65  | 82 | 75  | 163 | 173 | 186 | 156 | 158 | 165 | 90  |
| 17  | 19 | 24  | 83  | 101 | 85  | 70  | 43  | 62  | 21  |
| 50  | 51 | 52  | 115 | 155 | 114 | 133 | 120 | 118 | 54  |

|    |    |    |     |     |     |     |     |     |     |
|----|----|----|-----|-----|-----|-----|-----|-----|-----|
| 34 | 38 | 29 | 56  | 80  | 74  | 93  | 87  | 101 | 53  |
| 31 | 23 | 38 | 39  | 42  | 42  | 39  | 27  | 35  | 19  |
| 48 | 47 | 45 | 40  | 40  | 38  | 42  | 40  | 29  | 30  |
| 7  | 7  | 10 | 33  | 36  | 34  | 19  | 33  | 21  | 21  |
| 23 | 15 | 23 | 15  | 34  | 16  | 27  | 18  | 33  | 22  |
| 58 | 65 | 88 | 102 | 128 | 137 | 145 | 118 | 135 | 102 |
| 3  | 11 | 7  | 10  | 17  | 14  | 15  | 6   | 18  | 11  |
| 54 | 45 | 44 | 101 | 110 | 103 | 87  | 100 | 101 | 60  |
| 48 | 43 | 52 | 97  | 164 | 145 | 125 | 100 | 142 | 82  |
| 15 | 21 | 32 | 46  | 70  | 57  | 41  | 46  | 44  | 15  |
| 49 | 46 | 52 | 112 | 125 | 109 | 143 | 124 | 115 | 74  |
| 64 | 53 | 86 | 38  | 49  | 46  | 86  | 72  | 100 | 70  |
| 28 | 18 | 18 | 52  | 61  | 52  | 34  | 36  | 29  | 20  |
| 20 | 25 | 26 | 107 | 132 | 136 | 116 | 85  | 101 | 65  |
| 40 | 39 | 32 | 53  | 67  | 69  | 50  | 44  | 76  | 42  |
| 23 | 37 | 41 | 56  | 45  | 74  | 57  | 60  | 45  | 41  |
| 31 | 55 | 39 | 93  | 124 | 106 | 125 | 90  | 116 | 68  |
| 44 | 43 | 44 | 111 | 123 | 120 | 161 | 137 | 157 | 70  |
| 43 | 48 | 51 | 58  | 76  | 74  | 96  | 76  | 80  | 46  |
| 28 | 37 | 48 | 49  | 53  | 49  | 56  | 64  | 68  | 50  |
| 39 | 29 | 51 | 194 | 273 | 234 | 313 | 321 | 361 | 146 |
| 17 | 7  | 10 | 28  | 33  | 29  | 34  | 23  | 28  | 15  |
| 37 | 27 | 47 | 86  | 85  | 83  | 79  | 79  | 71  | 42  |
| 32 | 35 | 28 | 217 | 230 | 227 | 268 | 243 | 236 | 127 |
| 33 | 23 | 26 | 37  | 43  | 47  | 61  | 40  | 57  | 48  |
| 33 | 36 | 31 | 51  | 79  | 63  | 68  | 73  | 85  | 45  |
| 18 | 15 | 13 | 88  | 115 | 119 | 107 | 88  | 98  | 42  |
| 11 | 11 | 14 | 40  | 58  | 43  | 48  | 50  | 58  | 30  |
| 32 | 49 | 40 | 41  | 73  | 41  | 59  | 69  | 52  | 41  |
| 40 | 38 | 37 | 57  | 79  | 55  | 53  | 58  | 51  | 31  |
| 39 | 50 | 43 | 44  | 67  | 52  | 58  | 41  | 46  | 55  |
| 41 | 53 | 44 | 83  | 103 | 100 | 106 | 87  | 100 | 63  |
| 75 | 81 | 87 | 230 | 284 | 249 | 274 | 232 | 262 | 151 |
| 43 | 25 | 31 | 96  | 113 | 114 | 121 | 98  | 123 | 66  |
| 33 | 39 | 26 | 27  | 26  | 31  | 26  | 27  | 29  | 23  |
| 64 | 57 | 64 | 56  | 76  | 58  | 70  | 83  | 93  | 56  |
| 71 | 58 | 65 | 87  | 129 | 115 | 107 | 89  | 111 | 66  |
| 61 | 53 | 54 | 103 | 153 | 139 | 134 | 130 | 160 | 83  |
| 23 | 27 | 30 | 59  | 88  | 76  | 86  | 103 | 109 | 47  |
| 64 | 61 | 56 | 125 | 173 | 136 | 143 | 122 | 129 | 75  |
| 35 | 39 | 52 | 28  | 31  | 45  | 44  | 53  | 53  | 37  |

|     |     |     |     |     |     |     |     |     |     |
|-----|-----|-----|-----|-----|-----|-----|-----|-----|-----|
| 24  | 30  | 44  | 46  | 57  | 43  | 30  | 30  | 36  | 27  |
| 63  | 57  | 69  | 239 | 255 | 277 | 281 | 256 | 314 | 132 |
| 46  | 58  | 72  | 113 | 133 | 150 | 191 | 171 | 164 | 105 |
| 56  | 48  | 55  | 195 | 225 | 190 | 191 | 177 | 190 | 67  |
| 47  | 41  | 47  | 56  | 107 | 75  | 98  | 61  | 79  | 45  |
| 36  | 48  | 56  | 163 | 228 | 219 | 258 | 239 | 275 | 126 |
| 28  | 20  | 28  | 150 | 201 | 171 | 200 | 185 | 206 | 83  |
| 51  | 54  | 38  | 74  | 92  | 70  | 63  | 78  | 73  | 53  |
| 44  | 36  | 45  | 37  | 47  | 59  | 48  | 49  | 45  | 29  |
| 14  | 15  | 12  | 15  | 20  | 20  | 21  | 20  | 19  | 14  |
| 26  | 45  | 38  | 56  | 74  | 71  | 62  | 56  | 47  | 40  |
| 22  | 23  | 18  | 30  | 33  | 27  | 29  | 19  | 34  | 22  |
| 131 | 140 | 120 | 190 | 224 | 208 | 230 | 215 | 242 | 162 |
| 53  | 55  | 56  | 108 | 120 | 106 | 109 | 124 | 103 | 66  |
| 46  | 57  | 58  | 186 | 246 | 197 | 164 | 161 | 185 | 81  |
| 33  | 32  | 30  | 106 | 104 | 94  | 111 | 70  | 113 | 37  |
| 59  | 41  | 61  | 131 | 153 | 116 | 128 | 126 | 152 | 70  |
| 27  | 35  | 30  | 73  | 100 | 80  | 94  | 59  | 80  | 38  |
| 56  | 53  | 53  | 99  | 139 | 107 | 132 | 148 | 147 | 62  |
| 29  | 30  | 28  | 113 | 162 | 149 | 165 | 120 | 158 | 68  |
| 41  | 47  | 48  | 115 | 110 | 127 | 111 | 106 | 129 | 79  |
| 48  | 49  | 43  | 72  | 100 | 121 | 105 | 80  | 83  | 42  |
| 54  | 41  | 49  | 216 | 277 | 211 | 281 | 260 | 313 | 101 |
| 39  | 43  | 42  | 75  | 99  | 71  | 83  | 77  | 92  | 51  |
| 73  | 76  | 63  | 122 | 176 | 140 | 148 | 136 | 156 | 114 |
| 25  | 17  | 21  | 93  | 113 | 92  | 79  | 73  | 76  | 39  |
| 33  | 32  | 46  | 96  | 147 | 108 | 163 | 151 | 161 | 76  |
| 18  | 31  | 32  | 121 | 153 | 125 | 83  | 82  | 97  | 35  |
| 27  | 29  | 32  | 155 | 183 | 153 | 135 | 113 | 148 | 67  |
| 31  | 39  | 41  | 47  | 55  | 54  | 67  | 44  | 65  | 29  |
| 25  | 26  | 26  | 27  | 45  | 29  | 31  | 37  | 31  | 26  |
| 55  | 46  | 57  | 90  | 153 | 123 | 162 | 147 | 150 | 85  |
| 29  | 38  | 33  | 57  | 57  | 51  | 98  | 74  | 65  | 39  |
| 41  | 35  | 39  | 84  | 126 | 110 | 132 | 104 | 146 | 56  |
| 38  | 41  | 46  | 119 | 141 | 132 | 157 | 161 | 178 | 88  |
| 19  | 17  | 23  | 29  | 44  | 28  | 50  | 37  | 46  | 26  |
| 56  | 45  | 42  | 106 | 131 | 108 | 110 | 119 | 120 | 86  |
| 69  | 76  | 69  | 101 | 155 | 96  | 82  | 82  | 84  | 79  |
| 27  | 42  | 33  | 42  | 50  | 58  | 59  | 62  | 63  | 41  |
| 45  | 43  | 37  | 68  | 103 | 68  | 87  | 78  | 80  | 58  |
| 26  | 29  | 45  | 75  | 109 | 73  | 148 | 109 | 129 | 57  |

|    |    |    |     |     |     |     |     |     |     |
|----|----|----|-----|-----|-----|-----|-----|-----|-----|
| 67 | 40 | 51 | 71  | 82  | 83  | 50  | 63  | 75  | 44  |
| 60 | 46 | 49 | 88  | 131 | 124 | 94  | 82  | 95  | 41  |
| 55 | 41 | 44 | 124 | 209 | 149 | 119 | 111 | 143 | 74  |
| 53 | 58 | 66 | 312 | 477 | 285 | 449 | 378 | 405 | 165 |
| 33 | 32 | 41 | 91  | 136 | 103 | 123 | 95  | 98  | 54  |
| 26 | 24 | 35 | 54  | 55  | 56  | 41  | 39  | 50  | 38  |
| 61 | 78 | 65 | 317 | 389 | 363 | 375 | 361 | 354 | 158 |
| 35 | 49 | 43 | 53  | 64  | 50  | 60  | 53  | 62  | 44  |
| 73 | 68 | 81 | 106 | 124 | 126 | 129 | 105 | 97  | 93  |
| 17 | 28 | 24 | 96  | 115 | 93  | 59  | 38  | 56  | 33  |
| 11 | 15 | 20 | 3   | 5   | 5   | 3   | 7   | 10  | 12  |
| 39 | 42 | 60 | 162 | 239 | 228 | 217 | 196 | 259 | 95  |
| 50 | 52 | 50 | 66  | 73  | 89  | 79  | 93  | 75  | 75  |
| 59 | 55 | 80 | 90  | 110 | 106 | 81  | 75  | 85  | 41  |
| 46 | 67 | 80 | 36  | 36  | 38  | 53  | 50  | 56  | 58  |
| 36 | 31 | 41 | 89  | 103 | 85  | 75  | 68  | 84  | 39  |
| 27 | 31 | 34 | 55  | 73  | 72  | 74  | 59  | 60  | 31  |
| 9  | 5  | 7  | 16  | 23  | 24  | 15  | 18  | 16  | 8   |
| 53 | 39 | 32 | 48  | 64  | 58  | 38  | 56  | 55  | 50  |
| 39 | 30 | 43 | 66  | 93  | 71  | 69  | 60  | 55  | 45  |
| 40 | 34 | 24 | 145 | 190 | 147 | 143 | 107 | 124 | 62  |
| 67 | 57 | 61 | 108 | 168 | 129 | 173 | 165 | 186 | 91  |
| 25 | 34 | 29 | 49  | 52  | 60  | 65  | 41  | 48  | 26  |
| 55 | 56 | 86 | 111 | 138 | 116 | 112 | 122 | 125 | 84  |
| 34 | 42 | 50 | 187 | 257 | 216 | 292 | 255 | 274 | 125 |
| 24 | 37 | 34 | 48  | 48  | 37  | 49  | 66  | 57  | 42  |
| 37 | 33 | 31 | 81  | 96  | 91  | 58  | 52  | 77  | 39  |
| 58 | 65 | 84 | 319 | 375 | 309 | 366 | 275 | 346 | 153 |
| 48 | 40 | 35 | 23  | 16  | 25  | 27  | 20  | 20  | 27  |
| 30 | 24 | 41 | 103 | 117 | 118 | 85  | 90  | 96  | 47  |
| 69 | 61 | 68 | 313 | 395 | 306 | 333 | 328 | 323 | 155 |
| 62 | 48 | 65 | 198 | 206 | 185 | 138 | 134 | 172 | 67  |
| 46 | 41 | 43 | 87  | 128 | 138 | 114 | 75  | 122 | 59  |
| 53 | 34 | 30 | 201 | 265 | 191 | 319 | 258 | 307 | 141 |
| 32 | 38 | 43 | 333 | 388 | 400 | 418 | 422 | 392 | 196 |
| 34 | 42 | 47 | 70  | 95  | 112 | 76  | 59  | 91  | 36  |
| 16 | 25 | 26 | 33  | 46  | 50  | 35  | 26  | 39  | 24  |
| 22 | 28 | 27 | 57  | 65  | 50  | 59  | 45  | 62  | 46  |
| 37 | 30 | 47 | 51  | 58  | 57  | 76  | 79  | 84  | 46  |
| 48 | 46 | 65 | 163 | 208 | 176 | 164 | 192 | 181 | 90  |
| 21 | 20 | 17 | 123 | 194 | 123 | 170 | 126 | 165 | 59  |

|    |     |     |     |     |     |     |     |     |     |
|----|-----|-----|-----|-----|-----|-----|-----|-----|-----|
| 99 | 112 | 102 | 211 | 324 | 254 | 348 | 324 | 331 | 152 |
| 65 | 63  | 61  | 80  | 135 | 134 | 115 | 109 | 109 | 68  |
| 38 | 33  | 57  | 215 | 267 | 243 | 240 | 217 | 261 | 96  |
| 35 | 33  | 25  | 105 | 140 | 136 | 160 | 121 | 138 | 54  |
| 28 | 27  | 39  | 55  | 65  | 60  | 63  | 56  | 52  | 28  |
| 51 | 44  | 73  | 52  | 75  | 58  | 69  | 79  | 92  | 64  |
| 18 | 12  | 11  | 42  | 45  | 36  | 26  | 24  | 24  | 12  |
| 41 | 38  | 38  | 235 | 300 | 279 | 325 | 295 | 285 | 116 |
| 56 | 62  | 62  | 97  | 113 | 102 | 93  | 65  | 91  | 55  |
| 26 | 42  | 26  | 38  | 46  | 52  | 40  | 53  | 50  | 31  |
| 26 | 27  | 31  | 34  | 64  | 58  | 88  | 69  | 78  | 37  |
| 31 | 33  | 33  | 74  | 91  | 76  | 156 | 159 | 148 | 72  |
| 41 | 35  | 60  | 52  | 95  | 64  | 107 | 60  | 98  | 44  |
| 47 | 44  | 44  | 89  | 95  | 79  | 89  | 75  | 67  | 47  |
| 69 | 59  | 88  | 72  | 118 | 86  | 119 | 94  | 112 | 65  |
| 25 | 41  | 48  | 195 | 266 | 182 | 205 | 163 | 220 | 83  |
| 13 | 15  | 14  | 23  | 28  | 27  | 29  | 29  | 24  | 15  |
| 81 | 73  | 100 | 202 | 269 | 227 | 313 | 260 | 292 | 175 |
| 70 | 73  | 74  | 239 | 332 | 310 | 254 | 195 | 223 | 112 |
| 0  | 0   | 0   | 1   | 0   | 0   | 0   | 0   | 0   | 0   |
| 76 | 59  | 89  | 100 | 113 | 102 | 131 | 117 | 129 | 72  |
| 29 | 26  | 22  | 40  | 53  | 53  | 44  | 45  | 51  | 29  |
| 60 | 36  | 71  | 138 | 153 | 169 | 122 | 106 | 119 | 92  |
| 47 | 37  | 59  | 71  | 105 | 101 | 115 | 107 | 147 | 72  |
| 32 | 30  | 28  | 37  | 64  | 47  | 42  | 42  | 49  | 40  |
| 13 | 13  | 19  | 16  | 7   | 13  | 9   | 15  | 16  | 13  |
| 21 | 33  | 19  | 20  | 23  | 23  | 21  | 22  | 18  | 16  |
| 27 | 29  | 34  | 24  | 23  | 23  | 31  | 28  | 36  | 21  |
| 10 | 12  | 16  | 34  | 41  | 35  | 49  | 63  | 42  | 30  |
| 24 | 16  | 40  | 36  | 49  | 43  | 35  | 33  | 38  | 24  |
| 45 | 48  | 55  | 82  | 98  | 100 | 68  | 62  | 79  | 48  |
| 23 | 28  | 28  | 52  | 52  | 41  | 52  | 43  | 38  | 31  |
| 42 | 51  | 41  | 105 | 101 | 106 | 112 | 81  | 125 | 56  |
| 34 | 40  | 44  | 159 | 212 | 190 | 179 | 160 | 177 | 78  |
| 25 | 26  | 37  | 35  | 51  | 26  | 19  | 21  | 28  | 25  |
| 36 | 35  | 47  | 143 | 204 | 139 | 133 | 92  | 137 | 46  |
| 51 | 40  | 38  | 40  | 65  | 46  | 57  | 55  | 71  | 48  |
| 76 | 77  | 61  | 88  | 109 | 110 | 111 | 102 | 82  | 66  |
| 16 | 10  | 14  | 76  | 109 | 70  | 39  | 41  | 47  | 17  |
| 25 | 31  | 32  | 40  | 47  | 41  | 34  | 20  | 33  | 32  |
| 27 | 30  | 32  | 65  | 71  | 55  | 61  | 63  | 56  | 30  |

|    |     |     |     |     |     |     |     |     |     |
|----|-----|-----|-----|-----|-----|-----|-----|-----|-----|
| 21 | 21  | 21  | 34  | 42  | 29  | 42  | 46  | 48  | 26  |
| 32 | 26  | 29  | 40  | 55  | 36  | 45  | 45  | 42  | 32  |
| 33 | 43  | 48  | 80  | 101 | 89  | 98  | 76  | 90  | 34  |
| 20 | 12  | 16  | 13  | 17  | 10  | 15  | 15  | 14  | 20  |
| 16 | 22  | 19  | 44  | 50  | 38  | 42  | 33  | 41  | 34  |
| 23 | 31  | 39  | 58  | 86  | 71  | 66  | 58  | 88  | 41  |
| 54 | 39  | 53  | 149 | 167 | 145 | 203 | 190 | 215 | 115 |
| 23 | 34  | 27  | 101 | 143 | 114 | 158 | 130 | 161 | 77  |
| 6  | 9   | 12  | 12  | 10  | 13  | 10  | 18  | 14  | 8   |
| 37 | 33  | 35  | 71  | 94  | 69  | 60  | 45  | 67  | 32  |
| 61 | 68  | 78  | 92  | 98  | 92  | 121 | 115 | 114 | 75  |
| 21 | 16  | 21  | 42  | 53  | 45  | 50  | 49  | 60  | 29  |
| 37 | 64  | 45  | 200 | 257 | 199 | 192 | 212 | 220 | 105 |
| 53 | 66  | 58  | 80  | 91  | 71  | 74  | 51  | 75  | 65  |
| 33 | 38  | 26  | 63  | 71  | 61  | 68  | 54  | 47  | 29  |
| 79 | 111 | 102 | 204 | 273 | 261 | 271 | 237 | 286 | 136 |
| 47 | 46  | 42  | 91  | 134 | 111 | 124 | 121 | 102 | 61  |
| 44 | 35  | 38  | 172 | 273 | 233 | 208 | 197 | 235 | 94  |
| 44 | 47  | 46  | 187 | 298 | 229 | 232 | 211 | 223 | 102 |
| 32 | 23  | 36  | 109 | 128 | 141 | 115 | 106 | 117 | 41  |
| 87 | 82  | 101 | 72  | 102 | 73  | 107 | 82  | 102 | 80  |
| 50 | 55  | 57  | 53  | 73  | 52  | 53  | 46  | 58  | 50  |
| 48 | 59  | 50  | 75  | 87  | 88  | 91  | 87  | 109 | 59  |
| 41 | 48  | 46  | 80  | 129 | 98  | 168 | 148 | 164 | 81  |
| 7  | 18  | 17  | 48  | 70  | 56  | 72  | 68  | 80  | 24  |
| 44 | 58  | 48  | 39  | 66  | 62  | 63  | 67  | 69  | 43  |
| 6  | 5   | 9   | 29  | 45  | 30  | 42  | 43  | 28  | 14  |
| 26 | 37  | 41  | 137 | 207 | 166 | 221 | 201 | 200 | 101 |
| 26 | 37  | 41  | 339 | 433 | 332 | 434 | 340 | 434 | 188 |
| 66 | 48  | 56  | 377 | 497 | 407 | 526 | 397 | 487 | 167 |
| 34 | 35  | 36  | 96  | 127 | 99  | 157 | 130 | 138 | 70  |
| 9  | 9   | 11  | 13  | 20  | 7   | 19  | 9   | 17  | 14  |
| 2  | 1   | 3   | 5   | 5   | 8   | 3   | 9   | 6   | 12  |
| 29 | 40  | 31  | 76  | 68  | 81  | 95  | 79  | 97  | 56  |
| 32 | 34  | 43  | 117 | 164 | 143 | 103 | 140 | 103 | 57  |
| 35 | 19  | 27  | 125 | 187 | 117 | 131 | 118 | 135 | 66  |
| 41 | 31  | 43  | 204 | 277 | 275 | 317 | 319 | 327 | 121 |
| 47 | 43  | 50  | 138 | 150 | 135 | 127 | 131 | 112 | 50  |
| 43 | 44  | 55  | 76  | 76  | 70  | 80  | 73  | 74  | 52  |
| 33 | 27  | 38  | 68  | 88  | 62  | 85  | 61  | 76  | 33  |
| 54 | 49  | 47  | 88  | 98  | 89  | 137 | 137 | 129 | 77  |

|    |     |     |     |     |     |     |     |     |     |
|----|-----|-----|-----|-----|-----|-----|-----|-----|-----|
| 1  | 3   | 3   | 3   | 6   | 3   | 5   | 5   | 6   | 3   |
| 33 | 36  | 28  | 52  | 78  | 64  | 79  | 57  | 80  | 46  |
| 11 | 10  | 14  | 35  | 50  | 48  | 51  | 38  | 32  | 19  |
| 31 | 32  | 27  | 96  | 107 | 74  | 156 | 135 | 136 | 80  |
| 20 | 35  | 37  | 172 | 220 | 187 | 291 | 251 | 275 | 121 |
| 32 | 40  | 39  | 123 | 156 | 151 | 176 | 149 | 187 | 92  |
| 2  | 6   | 11  | 21  | 25  | 18  | 16  | 21  | 18  | 10  |
| 39 | 38  | 34  | 49  | 75  | 64  | 53  | 58  | 52  | 38  |
| 44 | 62  | 72  | 178 | 174 | 169 | 294 | 249 | 275 | 116 |
| 32 | 35  | 39  | 33  | 37  | 32  | 33  | 22  | 27  | 23  |
| 30 | 40  | 45  | 62  | 68  | 70  | 68  | 54  | 68  | 42  |
| 42 | 50  | 45  | 139 | 167 | 149 | 147 | 118 | 149 | 54  |
| 46 | 55  | 52  | 142 | 145 | 132 | 170 | 168 | 183 | 94  |
| 25 | 22  | 34  | 156 | 224 | 184 | 167 | 143 | 170 | 76  |
| 45 | 53  | 28  | 76  | 95  | 93  | 118 | 103 | 92  | 46  |
| 92 | 130 | 115 | 98  | 122 | 130 | 128 | 132 | 114 | 127 |
| 42 | 41  | 50  | 109 | 123 | 90  | 105 | 100 | 97  | 65  |
| 34 | 20  | 30  | 39  | 55  | 41  | 44  | 49  | 49  | 36  |
| 74 | 90  | 114 | 210 | 231 | 257 | 241 | 242 | 261 | 153 |
| 10 | 10  | 8   | 38  | 43  | 27  | 30  | 22  | 19  | 18  |
| 66 | 49  | 71  | 47  | 78  | 61  | 51  | 51  | 48  | 61  |
| 26 | 35  | 35  | 38  | 33  | 47  | 55  | 43  | 38  | 38  |
| 46 | 48  | 58  | 81  | 118 | 79  | 72  | 63  | 56  | 43  |
| 32 | 42  | 36  | 16  | 10  | 10  | 28  | 16  | 20  | 49  |
| 37 | 33  | 34  | 65  | 117 | 83  | 82  | 63  | 78  | 31  |
| 50 | 40  | 48  | 94  | 110 | 89  | 62  | 96  | 100 | 68  |
| 41 | 38  | 38  | 18  | 45  | 44  | 72  | 70  | 75  | 47  |
| 51 | 43  | 45  | 228 | 288 | 258 | 260 | 200 | 271 | 112 |
| 26 | 39  | 27  | 112 | 154 | 133 | 99  | 103 | 107 | 66  |
| 5  | 1   | 3   | 41  | 77  | 42  | 31  | 28  | 28  | 16  |
| 45 | 47  | 53  | 134 | 231 | 192 | 214 | 234 | 239 | 114 |
| 16 | 14  | 16  | 32  | 28  | 34  | 24  | 26  | 30  | 14  |
| 23 | 33  | 35  | 163 | 235 | 188 | 246 | 182 | 205 | 82  |
| 37 | 28  | 28  | 132 | 174 | 124 | 118 | 101 | 109 | 45  |
| 49 | 67  | 59  | 84  | 68  | 89  | 84  | 67  | 68  | 56  |
| 20 | 17  | 22  | 13  | 23  | 21  | 24  | 19  | 28  | 14  |
| 76 | 77  | 84  | 103 | 154 | 135 | 124 | 101 | 127 | 80  |
| 11 | 11  | 22  | 20  | 14  | 17  | 22  | 20  | 17  | 12  |
| 53 | 61  | 66  | 56  | 82  | 74  | 71  | 83  | 75  | 51  |
| 69 | 81  | 89  | 85  | 98  | 108 | 51  | 50  | 61  | 54  |
| 74 | 85  | 79  | 56  | 68  | 54  | 94  | 73  | 94  | 72  |

|    |    |    |     |     |     |     |     |     |    |
|----|----|----|-----|-----|-----|-----|-----|-----|----|
| 55 | 58 | 51 | 30  | 49  | 43  | 45  | 63  | 55  | 34 |
| 42 | 21 | 28 | 79  | 106 | 71  | 77  | 70  | 70  | 35 |
| 34 | 50 | 43 | 45  | 77  | 49  | 39  | 45  | 46  | 36 |
| 24 | 19 | 14 | 11  | 10  | 9   | 11  | 9   | 10  | 11 |
| 85 | 96 | 92 | 84  | 94  | 76  | 75  | 104 | 102 | 88 |
| 30 | 30 | 24 | 31  | 41  | 36  | 31  | 22  | 21  | 15 |
| 3  | 12 | 16 | 7   | 6   | 9   | 12  | 7   | 7   | 4  |
| 16 | 31 | 23 | 31  | 44  | 39  | 22  | 7   | 27  | 23 |
| 48 | 48 | 60 | 45  | 57  | 63  | 55  | 46  | 50  | 44 |
| 20 | 39 | 39 | 14  | 24  | 22  | 19  | 16  | 14  | 25 |
| 11 | 13 | 22 | 12  | 26  | 13  | 20  | 10  | 12  | 16 |
| 79 | 72 | 62 | 155 | 214 | 182 | 137 | 126 | 129 | 68 |
| 29 | 28 | 26 | 81  | 79  | 79  | 67  | 51  | 67  | 32 |
| 75 | 51 | 71 | 131 | 167 | 142 | 106 | 104 | 109 | 79 |
| 15 | 21 | 18 | 17  | 27  | 19  | 23  | 25  | 13  | 13 |
| 6  | 10 | 7  | 3   | 5   | 4   | 6   | 2   | 9   | 4  |
| 67 | 71 | 47 | 32  | 43  | 34  | 39  | 22  | 35  | 28 |
| 29 | 45 | 43 | 82  | 103 | 69  | 74  | 58  | 73  | 33 |
| 26 | 28 | 33 | 24  | 42  | 28  | 23  | 29  | 36  | 24 |
| 51 | 38 | 49 | 73  | 93  | 95  | 68  | 62  | 76  | 43 |
| 27 | 21 | 37 | 28  | 43  | 39  | 50  | 19  | 33  | 26 |
| 68 | 73 | 85 | 63  | 77  | 75  | 61  | 71  | 72  | 48 |
| 62 | 54 | 73 | 106 | 149 | 133 | 120 | 90  | 102 | 61 |
| 26 | 26 | 29 | 29  | 30  | 24  | 29  | 31  | 38  | 33 |
| 8  | 19 | 14 | 5   | 15  | 14  | 12  | 19  | 11  | 14 |
| 50 | 53 | 58 | 65  | 89  | 72  | 54  | 57  | 68  | 59 |
| 9  | 9  | 14 | 13  | 16  | 13  | 12  | 5   | 12  | 13 |
| 23 | 14 | 23 | 23  | 33  | 24  | 28  | 11  | 18  | 22 |
| 18 | 18 | 12 | 15  | 21  | 14  | 18  | 8   | 20  | 19 |
| 30 | 37 | 30 | 40  | 67  | 48  | 36  | 29  | 52  | 32 |
| 18 | 31 | 37 | 44  | 39  | 49  | 40  | 41  | 45  | 31 |
| 43 | 36 | 32 | 43  | 42  | 49  | 38  | 36  | 30  | 30 |
| 22 | 33 | 35 | 31  | 23  | 30  | 20  | 19  | 11  | 21 |
| 53 | 50 | 67 | 53  | 67  | 61  | 61  | 50  | 49  | 41 |
| 34 | 37 | 40 | 24  | 39  | 37  | 22  | 9   | 21  | 25 |
| 17 | 16 | 25 | 6   | 8   | 12  | 17  | 15  | 13  | 16 |
| 20 | 32 | 36 | 57  | 56  | 69  | 39  | 35  | 44  | 33 |
| 23 | 32 | 27 | 39  | 31  | 33  | 34  | 39  | 40  | 21 |
| 19 | 22 | 29 | 32  | 32  | 20  | 21  | 25  | 26  | 20 |
| 38 | 46 | 48 | 34  | 34  | 28  | 49  | 32  | 37  | 36 |
| 56 | 48 | 62 | 26  | 31  | 34  | 57  | 37  | 47  | 44 |



|    |    |    |     |     |     |     |     |     |    |
|----|----|----|-----|-----|-----|-----|-----|-----|----|
| 44 | 34 | 46 | 72  | 75  | 62  | 52  | 55  | 52  | 34 |
| 55 | 45 | 60 | 140 | 171 | 171 | 118 | 108 | 120 | 70 |
| 17 | 19 | 13 | 18  | 15  | 14  | 15  | 17  | 20  | 19 |
| 23 | 20 | 8  | 12  | 13  | 15  | 16  | 17  | 16  | 14 |
| 56 | 47 | 37 | 69  | 128 | 108 | 101 | 86  | 84  | 54 |
| 30 | 21 | 48 | 39  | 40  | 56  | 37  | 46  | 48  | 30 |
| 54 | 39 | 49 | 105 | 134 | 121 | 98  | 99  | 87  | 51 |
| 24 | 23 | 37 | 57  | 75  | 57  | 30  | 29  | 29  | 30 |
| 35 | 35 | 53 | 49  | 63  | 58  | 53  | 38  | 44  | 21 |
| 31 | 29 | 28 | 137 | 179 | 156 | 159 | 157 | 164 | 59 |
| 30 | 31 | 42 | 58  | 57  | 49  | 68  | 54  | 60  | 31 |
| 60 | 77 | 72 | 68  | 98  | 79  | 68  | 75  | 69  | 52 |
| 20 | 20 | 34 | 29  | 40  | 31  | 46  | 42  | 47  | 25 |
| 49 | 44 | 67 | 71  | 79  | 77  | 58  | 45  | 69  | 37 |
| 19 | 18 | 19 | 12  | 21  | 18  | 17  | 12  | 9   | 12 |
| 30 | 31 | 39 | 80  | 135 | 88  | 54  | 58  | 51  | 25 |
| 31 | 42 | 52 | 36  | 54  | 59  | 47  | 43  | 25  | 46 |
| 16 | 17 | 18 | 43  | 51  | 41  | 38  | 27  | 30  | 20 |
| 29 | 27 | 44 | 62  | 79  | 88  | 83  | 65  | 66  | 32 |
| 17 | 16 | 15 | 38  | 57  | 46  | 37  | 26  | 32  | 15 |
| 33 | 25 | 28 | 42  | 52  | 45  | 48  | 54  | 47  | 36 |
| 39 | 42 | 36 | 40  | 63  | 54  | 61  | 38  | 29  | 35 |
| 16 | 10 | 21 | 9   | 14  | 12  | 8   | 7   | 16  | 8  |
| 31 | 35 | 33 | 14  | 25  | 20  | 22  | 15  | 24  | 17 |
| 23 | 16 | 18 | 29  | 44  | 36  | 26  | 27  | 29  | 15 |
| 10 | 5  | 14 | 14  | 12  | 11  | 11  | 6   | 10  | 11 |
| 42 | 46 | 51 | 41  | 49  | 33  | 27  | 37  | 33  | 21 |
| 22 | 36 | 35 | 37  | 28  | 39  | 30  | 30  | 36  | 20 |
| 34 | 45 | 45 | 54  | 67  | 49  | 50  | 51  | 42  | 32 |
| 67 | 70 | 80 | 45  | 72  | 66  | 59  | 65  | 74  | 47 |
| 4  | 7  | 3  | 2   | 3   | 1   | 6   | 5   | 7   | 1  |
| 22 | 22 | 23 | 31  | 39  | 49  | 36  | 21  | 44  | 29 |
| 53 | 38 | 50 | 52  | 51  | 42  | 53  | 44  | 42  | 49 |
| 40 | 40 | 46 | 53  | 64  | 64  | 55  | 53  | 68  | 34 |
| 21 | 16 | 24 | 18  | 15  | 13  | 13  | 13  | 18  | 15 |
| 45 | 68 | 63 | 73  | 69  | 67  | 82  | 59  | 57  | 57 |
| 38 | 32 | 40 | 45  | 56  | 41  | 35  | 28  | 44  | 24 |
| 37 | 45 | 43 | 63  | 71  | 63  | 39  | 44  | 49  | 33 |
| 20 | 21 | 19 | 35  | 27  | 41  | 38  | 41  | 54  | 39 |
| 45 | 46 | 47 | 27  | 47  | 37  | 34  | 39  | 41  | 32 |
| 43 | 50 | 54 | 57  | 79  | 47  | 59  | 48  | 48  | 45 |

|     |     |     |     |     |     |     |     |     |     |
|-----|-----|-----|-----|-----|-----|-----|-----|-----|-----|
| 27  | 13  | 33  | 65  | 77  | 56  | 36  | 38  | 42  | 25  |
| 20  | 15  | 20  | 14  | 16  | 10  | 16  | 14  | 7   | 17  |
| 47  | 71  | 65  | 205 | 270 | 234 | 266 | 226 | 230 | 119 |
| 34  | 36  | 38  | 36  | 39  | 49  | 38  | 27  | 49  | 28  |
| 27  | 27  | 26  | 23  | 35  | 26  | 17  | 23  | 23  | 23  |
| 22  | 28  | 20  | 31  | 35  | 29  | 24  | 23  | 23  | 24  |
| 59  | 39  | 54  | 32  | 50  | 39  | 67  | 48  | 70  | 46  |
| 12  | 10  | 12  | 7   | 6   | 4   | 6   | 4   | 5   | 9   |
| 67  | 69  | 76  | 39  | 50  | 48  | 47  | 38  | 51  | 47  |
| 29  | 31  | 30  | 13  | 29  | 26  | 30  | 23  | 27  | 22  |
| 12  | 12  | 23  | 17  | 24  | 27  | 18  | 13  | 24  | 20  |
| 158 | 190 | 188 | 108 | 120 | 105 | 112 | 118 | 143 | 84  |
| 11  | 15  | 13  | 11  | 13  | 8   | 10  | 8   | 15  | 17  |
| 25  | 21  | 25  | 12  | 19  | 18  | 21  | 21  | 19  | 21  |
| 18  | 31  | 29  | 83  | 103 | 89  | 104 | 81  | 84  | 41  |
| 7   | 25  | 19  | 5   | 17  | 14  | 18  | 17  | 12  | 15  |
| 47  | 48  | 60  | 71  | 103 | 93  | 101 | 133 | 141 | 65  |
| 23  | 14  | 15  | 21  | 18  | 24  | 17  | 11  | 17  | 14  |
| 7   | 16  | 12  | 14  | 17  | 12  | 11  | 12  | 13  | 14  |
| 16  | 26  | 19  | 19  | 25  | 20  | 15  | 24  | 10  | 17  |
| 59  | 55  | 61  | 49  | 83  | 75  | 52  | 53  | 55  | 55  |
| 10  | 13  | 18  | 12  | 12  | 5   | 18  | 10  | 11  | 17  |
| 22  | 25  | 22  | 12  | 18  | 10  | 17  | 21  | 24  | 26  |
| 5   | 7   | 4   | 1   | 3   | 2   | 1   | 2   | 6   | 3   |
| 30  | 32  | 26  | 13  | 28  | 16  | 19  | 15  | 19  | 20  |
| 36  | 30  | 36  | 117 | 163 | 147 | 185 | 160 | 175 | 104 |
| 69  | 72  | 89  | 99  | 127 | 134 | 115 | 110 | 128 | 80  |
| 31  | 41  | 42  | 43  | 63  | 62  | 51  | 41  | 48  | 28  |
| 51  | 66  | 61  | 167 | 225 | 195 | 146 | 130 | 138 | 98  |
| 20  | 16  | 29  | 30  | 23  | 30  | 34  | 26  | 24  | 18  |
| 30  | 29  | 29  | 39  | 51  | 36  | 58  | 38  | 43  | 42  |
| 12  | 9   | 12  | 22  | 27  | 27  | 15  | 15  | 14  | 8   |
| 50  | 58  | 62  | 60  | 79  | 62  | 69  | 71  | 67  | 53  |
| 21  | 13  | 18  | 5   | 7   | 7   | 15  | 19  | 11  | 9   |
| 30  | 26  | 35  | 25  | 26  | 30  | 24  | 23  | 18  | 20  |
| 79  | 100 | 112 | 73  | 76  | 67  | 62  | 53  | 66  | 41  |
| 16  | 19  | 23  | 11  | 30  | 24  | 18  | 12  | 16  | 9   |
| 12  | 20  | 14  | 42  | 71  | 62  | 33  | 39  | 37  | 15  |
| 50  | 33  | 47  | 66  | 85  | 68  | 76  | 50  | 44  | 36  |
| 28  | 21  | 26  | 9   | 7   | 14  | 17  | 15  | 8   | 11  |
| 23  | 18  | 33  | 29  | 31  | 30  | 28  | 19  | 20  | 22  |

|     |     |     |     |     |     |     |     |     |     |
|-----|-----|-----|-----|-----|-----|-----|-----|-----|-----|
| 56  | 46  | 60  | 71  | 54  | 58  | 35  | 35  | 31  | 42  |
| 23  | 18  | 12  | 15  | 17  | 17  | 19  | 25  | 13  | 23  |
| 47  | 53  | 68  | 39  | 57  | 39  | 48  | 35  | 40  | 49  |
| 17  | 15  | 27  | 17  | 20  | 23  | 18  | 22  | 19  | 22  |
| 14  | 25  | 18  | 28  | 37  | 35  | 23  | 26  | 19  | 20  |
| 42  | 37  | 35  | 81  | 77  | 87  | 78  | 67  | 98  | 45  |
| 42  | 35  | 50  | 56  | 70  | 53  | 74  | 65  | 68  | 38  |
| 55  | 51  | 61  | 109 | 136 | 108 | 93  | 83  | 105 | 48  |
| 21  | 30  | 46  | 24  | 41  | 28  | 23  | 21  | 23  | 15  |
| 5   | 9   | 5   | 1   | 6   | 8   | 5   | 3   | 2   | 4   |
| 32  | 32  | 27  | 33  | 37  | 24  | 33  | 35  | 36  | 24  |
| 28  | 26  | 31  | 39  | 62  | 49  | 33  | 49  | 44  | 19  |
| 24  | 22  | 28  | 12  | 24  | 24  | 16  | 20  | 24  | 29  |
| 39  | 52  | 54  | 41  | 57  | 40  | 39  | 32  | 39  | 33  |
| 30  | 42  | 53  | 186 | 227 | 183 | 178 | 157 | 171 | 88  |
| 80  | 41  | 55  | 37  | 49  | 40  | 61  | 61  | 72  | 42  |
| 30  | 42  | 23  | 11  | 23  | 27  | 13  | 22  | 18  | 24  |
| 38  | 61  | 65  | 48  | 55  | 54  | 77  | 40  | 64  | 40  |
| 8   | 16  | 22  | 12  | 17  | 7   | 10  | 12  | 15  | 12  |
| 25  | 34  | 45  | 40  | 36  | 49  | 41  | 51  | 56  | 35  |
| 43  | 51  | 75  | 67  | 92  | 70  | 60  | 61  | 62  | 34  |
| 20  | 25  | 28  | 15  | 19  | 15  | 23  | 17  | 22  | 15  |
| 47  | 41  | 49  | 56  | 62  | 41  | 62  | 47  | 57  | 47  |
| 25  | 21  | 42  | 52  | 70  | 55  | 43  | 34  | 47  | 29  |
| 47  | 34  | 63  | 35  | 37  | 52  | 39  | 30  | 53  | 35  |
| 44  | 43  | 33  | 20  | 16  | 17  | 19  | 16  | 34  | 26  |
| 42  | 44  | 31  | 58  | 68  | 63  | 68  | 61  | 76  | 40  |
| 65  | 76  | 60  | 222 | 289 | 235 | 200 | 195 | 240 | 107 |
| 53  | 71  | 54  | 70  | 55  | 61  | 58  | 54  | 76  | 54  |
| 36  | 24  | 41  | 63  | 95  | 74  | 52  | 67  | 70  | 39  |
| 35  | 35  | 41  | 60  | 69  | 61  | 49  | 49  | 47  | 34  |
| 26  | 27  | 36  | 37  | 47  | 37  | 26  | 28  | 37  | 26  |
| 51  | 56  | 55  | 108 | 109 | 98  | 68  | 69  | 77  | 62  |
| 40  | 41  | 43  | 92  | 98  | 80  | 70  | 63  | 67  | 38  |
| 49  | 37  | 55  | 43  | 71  | 48  | 54  | 37  | 45  | 38  |
| 49  | 36  | 49  | 26  | 43  | 27  | 32  | 21  | 29  | 18  |
| 16  | 25  | 14  | 13  | 24  | 16  | 20  | 26  | 31  | 14  |
| 11  | 22  | 17  | 17  | 10  | 14  | 14  | 8   | 11  | 15  |
| 25  | 22  | 11  | 16  | 19  | 11  | 21  | 13  | 20  | 12  |
| 61  | 52  | 58  | 47  | 51  | 58  | 46  | 45  | 68  | 42  |
| 141 | 153 | 150 | 114 | 143 | 153 | 124 | 111 | 125 | 142 |

|    |    |    |     |     |     |     |     |     |     |
|----|----|----|-----|-----|-----|-----|-----|-----|-----|
| 31 | 43 | 46 | 36  | 65  | 60  | 49  | 41  | 66  | 34  |
| 34 | 27 | 29 | 63  | 76  | 72  | 68  | 60  | 58  | 57  |
| 24 | 29 | 27 | 39  | 45  | 39  | 44  | 54  | 48  | 27  |
| 16 | 9  | 12 | 62  | 90  | 63  | 25  | 21  | 29  | 17  |
| 28 | 37 | 48 | 70  | 79  | 80  | 67  | 63  | 77  | 30  |
| 22 | 22 | 22 | 13  | 24  | 15  | 19  | 12  | 17  | 17  |
| 21 | 34 | 42 | 39  | 51  | 34  | 39  | 26  | 17  | 33  |
| 44 | 40 | 45 | 46  | 59  | 63  | 42  | 49  | 51  | 35  |
| 30 | 24 | 40 | 119 | 165 | 160 | 132 | 132 | 165 | 52  |
| 47 | 41 | 49 | 40  | 72  | 47  | 54  | 42  | 48  | 36  |
| 26 | 23 | 18 | 14  | 19  | 18  | 13  | 10  | 13  | 15  |
| 21 | 24 | 16 | 44  | 55  | 46  | 46  | 36  | 51  | 32  |
| 33 | 32 | 33 | 20  | 26  | 29  | 36  | 44  | 39  | 26  |
| 44 | 43 | 35 | 107 | 92  | 76  | 83  | 83  | 84  | 42  |
| 21 | 22 | 34 | 21  | 24  | 20  | 17  | 14  | 20  | 26  |
| 5  | 4  | 8  | 3   | 4   | 7   | 4   | 1   | 2   | 7   |
| 39 | 43 | 41 | 96  | 113 | 107 | 63  | 48  | 65  | 42  |
| 28 | 27 | 27 | 19  | 28  | 27  | 30  | 25  | 34  | 30  |
| 28 | 20 | 22 | 28  | 38  | 25  | 36  | 38  | 32  | 24  |
| 38 | 37 | 55 | 52  | 60  | 65  | 40  | 43  | 66  | 52  |
| 31 | 41 | 57 | 34  | 36  | 36  | 36  | 44  | 41  | 36  |
| 35 | 37 | 43 | 57  | 43  | 45  | 34  | 23  | 41  | 44  |
| 12 | 12 | 19 | 15  | 27  | 17  | 23  | 27  | 29  | 13  |
| 34 | 34 | 36 | 53  | 47  | 56  | 57  | 55  | 57  | 52  |
| 62 | 53 | 52 | 78  | 98  | 78  | 53  | 62  | 80  | 36  |
| 26 | 28 | 32 | 40  | 45  | 36  | 35  | 26  | 36  | 25  |
| 21 | 22 | 15 | 20  | 16  | 17  | 23  | 15  | 15  | 16  |
| 13 | 17 | 17 | 25  | 32  | 20  | 33  | 32  | 32  | 10  |
| 66 | 76 | 53 | 107 | 138 | 131 | 107 | 100 | 82  | 59  |
| 35 | 41 | 32 | 60  | 71  | 66  | 43  | 43  | 34  | 29  |
| 29 | 33 | 29 | 40  | 53  | 33  | 37  | 32  | 32  | 31  |
| 49 | 56 | 49 | 76  | 107 | 98  | 69  | 58  | 67  | 63  |
| 15 | 25 | 16 | 11  | 12  | 12  | 19  | 11  | 17  | 21  |
| 9  | 17 | 11 | 5   | 10  | 8   | 12  | 6   | 20  | 10  |
| 54 | 57 | 73 | 66  | 98  | 84  | 83  | 64  | 78  | 60  |
| 32 | 27 | 38 | 29  | 23  | 28  | 28  | 24  | 32  | 28  |
| 17 | 10 | 10 | 2   | 6   | 8   | 5   | 5   | 9   | 7   |
| 33 | 35 | 41 | 23  | 35  | 32  | 28  | 30  | 33  | 21  |
| 26 | 24 | 34 | 38  | 55  | 46  | 33  | 34  | 29  | 30  |
| 28 | 33 | 34 | 166 | 259 | 222 | 228 | 237 | 221 | 100 |
| 50 | 56 | 61 | 103 | 136 | 117 | 90  | 77  | 83  | 59  |

|    |    |    |     |     |     |     |     |     |    |
|----|----|----|-----|-----|-----|-----|-----|-----|----|
| 29 | 23 | 26 | 17  | 29  | 26  | 22  | 18  | 29  | 30 |
| 30 | 34 | 37 | 52  | 56  | 70  | 49  | 51  | 43  | 23 |
| 34 | 30 | 28 | 20  | 21  | 22  | 24  | 28  | 16  | 32 |
| 63 | 51 | 64 | 61  | 83  | 78  | 82  | 64  | 77  | 65 |
| 30 | 30 | 26 | 47  | 62  | 54  | 53  | 41  | 42  | 38 |
| 21 | 16 | 23 | 33  | 42  | 25  | 34  | 40  | 33  | 22 |
| 7  | 9  | 10 | 9   | 13  | 11  | 12  | 10  | 11  | 9  |
| 15 | 19 | 18 | 42  | 63  | 41  | 41  | 33  | 32  | 22 |
| 6  | 1  | 0  | 1   | 10  | 5   | 5   | 1   | 2   | 4  |
| 72 | 91 | 82 | 77  | 120 | 110 | 127 | 128 | 129 | 62 |
| 28 | 10 | 30 | 35  | 38  | 30  | 34  | 24  | 25  | 22 |
| 34 | 29 | 47 | 63  | 83  | 69  | 37  | 51  | 54  | 31 |
| 9  | 5  | 11 | 3   | 3   | 2   | 2   | 5   | 3   | 4  |
| 22 | 23 | 29 | 48  | 45  | 49  | 64  | 43  | 45  | 21 |
| 39 | 37 | 39 | 70  | 72  | 59  | 66  | 57  | 61  | 34 |
| 17 | 16 | 23 | 10  | 15  | 16  | 17  | 16  | 17  | 13 |
| 57 | 41 | 53 | 45  | 52  | 52  | 54  | 47  | 54  | 42 |
| 59 | 61 | 63 | 53  | 75  | 60  | 67  | 51  | 40  | 45 |
| 44 | 51 | 62 | 49  | 68  | 56  | 74  | 58  | 72  | 40 |
| 24 | 21 | 35 | 14  | 24  | 28  | 24  | 13  | 21  | 20 |
| 4  | 5  | 7  | 4   | 9   | 11  | 5   | 13  | 12  | 11 |
| 32 | 43 | 49 | 30  | 31  | 36  | 33  | 34  | 39  | 41 |
| 22 | 20 | 31 | 21  | 17  | 25  | 27  | 25  | 25  | 38 |
| 41 | 38 | 46 | 117 | 127 | 126 | 135 | 128 | 134 | 73 |
| 33 | 28 | 38 | 43  | 52  | 58  | 52  | 32  | 52  | 31 |
| 38 | 41 | 39 | 46  | 77  | 55  | 52  | 44  | 38  | 30 |
| 37 | 25 | 35 | 49  | 59  | 57  | 46  | 43  | 52  | 44 |
| 45 | 42 | 37 | 33  | 35  | 33  | 51  | 37  | 34  | 33 |
| 21 | 24 | 32 | 27  | 20  | 19  | 21  | 13  | 15  | 17 |
| 23 | 27 | 17 | 22  | 33  | 36  | 25  | 27  | 24  | 21 |
| 38 | 35 | 35 | 17  | 26  | 13  | 25  | 23  | 31  | 23 |
| 27 | 33 | 39 | 52  | 50  | 56  | 43  | 40  | 49  | 27 |
| 25 | 20 | 28 | 49  | 66  | 62  | 32  | 32  | 41  | 38 |
| 33 | 43 | 38 | 86  | 116 | 93  | 99  | 94  | 97  | 52 |
| 24 | 23 | 29 | 24  | 48  | 43  | 33  | 36  | 29  | 29 |
| 45 | 52 | 64 | 112 | 122 | 142 | 125 | 109 | 108 | 67 |
| 5  | 16 | 12 | 11  | 18  | 13  | 19  | 12  | 12  | 10 |
| 22 | 25 | 29 | 35  | 23  | 41  | 33  | 42  | 37  | 28 |
| 31 | 29 | 39 | 53  | 65  | 55  | 63  | 54  | 50  | 41 |
| 61 | 45 | 56 | 85  | 77  | 80  | 67  | 59  | 57  | 49 |
| 60 | 59 | 59 | 102 | 107 | 91  | 82  | 63  | 88  | 65 |

|    |    |    |     |     |     |     |     |     |    |
|----|----|----|-----|-----|-----|-----|-----|-----|----|
| 12 | 24 | 16 | 15  | 16  | 19  | 19  | 16  | 15  | 16 |
| 80 | 89 | 85 | 131 | 145 | 138 | 113 | 84  | 119 | 65 |
| 40 | 36 | 56 | 73  | 83  | 96  | 66  | 56  | 62  | 55 |
| 17 | 23 | 31 | 17  | 10  | 10  | 16  | 13  | 17  | 21 |
| 48 | 35 | 38 | 45  | 67  | 54  | 39  | 34  | 31  | 39 |
| 68 | 39 | 51 | 83  | 114 | 128 | 91  | 97  | 118 | 67 |
| 8  | 13 | 11 | 8   | 14  | 14  | 16  | 20  | 14  | 14 |
| 38 | 54 | 33 | 37  | 72  | 52  | 31  | 34  | 38  | 32 |
| 31 | 36 | 34 | 25  | 34  | 25  | 42  | 41  | 51  | 32 |
| 16 | 33 | 34 | 34  | 41  | 46  | 40  | 32  | 44  | 24 |
| 29 | 33 | 30 | 73  | 79  | 64  | 55  | 51  | 50  | 46 |
| 51 | 54 | 45 | 69  | 74  | 62  | 61  | 62  | 51  | 61 |
| 24 | 37 | 40 | 44  | 61  | 47  | 36  | 49  | 50  | 34 |
| 15 | 11 | 18 | 12  | 12  | 5   | 7   | 5   | 13  | 13 |
| 10 | 7  | 13 | 19  | 26  | 23  | 22  | 12  | 11  | 11 |
| 27 | 25 | 29 | 44  | 60  | 41  | 22  | 32  | 35  | 30 |
| 72 | 72 | 80 | 93  | 114 | 91  | 104 | 65  | 79  | 69 |
| 25 | 24 | 23 | 24  | 43  | 30  | 28  | 42  | 34  | 21 |
| 32 | 25 | 33 | 44  | 68  | 47  | 37  | 36  | 44  | 24 |
| 36 | 37 | 32 | 18  | 39  | 45  | 43  | 42  | 49  | 19 |
| 45 | 36 | 47 | 51  | 62  | 49  | 54  | 35  | 37  | 54 |
| 34 | 22 | 34 | 28  | 30  | 29  | 32  | 24  | 23  | 29 |
| 18 | 31 | 27 | 33  | 38  | 33  | 33  | 39  | 33  | 37 |
| 27 | 22 | 27 | 24  | 28  | 22  | 21  | 26  | 31  | 25 |
| 48 | 39 | 40 | 36  | 51  | 29  | 31  | 29  | 31  | 23 |
| 51 | 29 | 54 | 62  | 52  | 65  | 63  | 50  | 50  | 30 |
| 58 | 47 | 54 | 52  | 82  | 61  | 84  | 56  | 85  | 58 |
| 29 | 23 | 25 | 49  | 69  | 49  | 48  | 59  | 73  | 28 |
| 33 | 26 | 30 | 34  | 36  | 46  | 27  | 24  | 26  | 20 |
| 12 | 16 | 18 | 35  | 39  | 30  | 33  | 21  | 21  | 14 |
| 15 | 16 | 23 | 19  | 38  | 22  | 19  | 17  | 15  | 15 |
| 39 | 39 | 47 | 49  | 56  | 35  | 58  | 50  | 63  | 44 |
| 11 | 14 | 19 | 5   | 2   | 3   | 10  | 3   | 6   | 10 |
| 52 | 46 | 50 | 55  | 83  | 85  | 67  | 42  | 69  | 44 |
| 20 | 22 | 14 | 18  | 27  | 16  | 14  | 17  | 31  | 33 |
| 28 | 26 | 24 | 36  | 39  | 37  | 31  | 29  | 26  | 30 |
| 36 | 27 | 28 | 48  | 40  | 51  | 43  | 33  | 34  | 35 |
| 50 | 44 | 43 | 71  | 81  | 72  | 73  | 71  | 75  | 53 |
| 42 | 45 | 61 | 150 | 172 | 165 | 123 | 128 | 129 | 74 |
| 38 | 45 | 38 | 58  | 85  | 68  | 85  | 89  | 100 | 44 |
| 48 | 36 | 72 | 40  | 34  | 43  | 53  | 45  | 55  | 50 |

|    |    |    |     |     |     |     |     |     |    |
|----|----|----|-----|-----|-----|-----|-----|-----|----|
| 43 | 42 | 59 | 37  | 39  | 30  | 33  | 33  | 37  | 36 |
| 27 | 21 | 34 | 29  | 35  | 23  | 39  | 35  | 32  | 24 |
| 41 | 42 | 65 | 104 | 130 | 135 | 113 | 104 | 117 | 55 |
| 30 | 32 | 37 | 45  | 48  | 37  | 54  | 33  | 35  | 29 |
| 51 | 50 | 58 | 133 | 180 | 145 | 165 | 157 | 158 | 90 |
| 48 | 33 | 36 | 53  | 96  | 63  | 83  | 99  | 101 | 52 |
| 27 | 30 | 28 | 15  | 23  | 12  | 6   | 15  | 25  | 15 |
| 15 | 25 | 21 | 19  | 21  | 21  | 18  | 26  | 19  | 24 |
| 60 | 40 | 51 | 67  | 101 | 76  | 91  | 53  | 84  | 40 |
| 42 | 50 | 58 | 60  | 67  | 44  | 57  | 45  | 55  | 52 |
| 17 | 23 | 29 | 14  | 25  | 15  | 10  | 14  | 17  | 15 |
| 17 | 28 | 29 | 30  | 31  | 15  | 33  | 25  | 17  | 30 |
| 5  | 12 | 17 | 11  | 15  | 14  | 13  | 9   | 15  | 8  |
| 38 | 31 | 30 | 23  | 27  | 37  | 39  | 27  | 28  | 35 |
| 16 | 23 | 18 | 29  | 36  | 28  | 27  | 18  | 21  | 18 |
| 47 | 39 | 34 | 39  | 61  | 50  | 59  | 38  | 36  | 38 |
| 18 | 18 | 28 | 19  | 19  | 24  | 25  | 21  | 27  | 21 |
| 63 | 66 | 79 | 207 | 233 | 210 | 216 | 170 | 211 | 99 |
| 21 | 17 | 16 | 19  | 35  | 24  | 8   | 14  | 7   | 13 |
| 31 | 33 | 27 | 27  | 32  | 37  | 34  | 34  | 35  | 22 |
| 52 | 45 | 35 | 55  | 80  | 82  | 51  | 45  | 53  | 43 |
| 23 | 46 | 37 | 25  | 25  | 24  | 39  | 45  | 37  | 29 |
| 27 | 30 | 29 | 23  | 35  | 23  | 21  | 18  | 18  | 18 |
| 40 | 52 | 46 | 40  | 73  | 58  | 38  | 41  | 46  | 46 |
| 18 | 19 | 29 | 64  | 81  | 77  | 71  | 63  | 63  | 28 |
| 41 | 56 | 63 | 56  | 82  | 71  | 64  | 58  | 62  | 46 |
| 53 | 32 | 40 | 215 | 247 | 220 | 183 | 149 | 170 | 67 |
| 39 | 46 | 46 | 76  | 106 | 78  | 60  | 65  | 57  | 45 |
| 28 | 25 | 31 | 39  | 46  | 36  | 32  | 32  | 30  | 18 |
| 12 | 11 | 15 | 3   | 6   | 7   | 3   | 8   | 9   | 9  |
| 36 | 32 | 27 | 61  | 67  | 50  | 42  | 39  | 36  | 25 |
| 19 | 17 | 15 | 51  | 65  | 38  | 58  | 43  | 42  | 25 |
| 31 | 23 | 20 | 25  | 35  | 33  | 23  | 17  | 24  | 15 |
| 40 | 36 | 49 | 101 | 138 | 92  | 76  | 70  | 60  | 55 |
| 45 | 35 | 48 | 62  | 78  | 66  | 75  | 54  | 58  | 53 |
| 17 | 23 | 27 | 41  | 46  | 41  | 32  | 43  | 49  | 25 |
| 11 | 10 | 20 | 51  | 56  | 47  | 41  | 38  | 50  | 18 |
| 18 | 24 | 27 | 67  | 71  | 68  | 69  | 59  | 53  | 34 |
| 62 | 59 | 74 | 86  | 101 | 91  | 90  | 86  | 89  | 63 |
| 23 | 17 | 29 | 12  | 16  | 9   | 11  | 17  | 21  | 14 |
| 28 | 25 | 18 | 27  | 44  | 43  | 31  | 18  | 29  | 18 |

|     |    |     |     |     |     |     |     |     |    |
|-----|----|-----|-----|-----|-----|-----|-----|-----|----|
| 23  | 32 | 18  | 29  | 31  | 22  | 22  | 22  | 13  | 21 |
| 29  | 40 | 43  | 63  | 73  | 65  | 60  | 62  | 47  | 39 |
| 47  | 59 | 36  | 43  | 47  | 40  | 54  | 53  | 55  | 40 |
| 11  | 16 | 21  | 30  | 41  | 31  | 29  | 38  | 29  | 23 |
| 32  | 35 | 28  | 48  | 67  | 70  | 53  | 50  | 51  | 28 |
| 24  | 27 | 41  | 42  | 63  | 53  | 46  | 30  | 53  | 26 |
| 37  | 42 | 40  | 32  | 47  | 45  | 32  | 39  | 36  | 42 |
| 44  | 43 | 50  | 120 | 151 | 139 | 134 | 132 | 107 | 74 |
| 13  | 14 | 13  | 39  | 33  | 34  | 19  | 24  | 23  | 20 |
| 18  | 19 | 25  | 6   | 14  | 18  | 21  | 14  | 13  | 13 |
| 30  | 32 | 37  | 163 | 204 | 145 | 120 | 122 | 127 | 57 |
| 19  | 22 | 26  | 28  | 34  | 40  | 41  | 32  | 33  | 28 |
| 25  | 34 | 35  | 32  | 58  | 34  | 43  | 33  | 43  | 23 |
| 39  | 28 | 38  | 85  | 83  | 87  | 49  | 39  | 44  | 34 |
| 27  | 34 | 40  | 41  | 50  | 52  | 63  | 51  | 50  | 43 |
| 14  | 29 | 22  | 26  | 24  | 17  | 28  | 23  | 22  | 19 |
| 14  | 11 | 24  | 21  | 38  | 35  | 27  | 23  | 21  | 20 |
| 39  | 31 | 40  | 54  | 67  | 60  | 69  | 59  | 73  | 30 |
| 31  | 39 | 56  | 30  | 43  | 29  | 33  | 26  | 47  | 52 |
| 44  | 37 | 34  | 80  | 96  | 80  | 44  | 32  | 58  | 47 |
| 28  | 27 | 34  | 5   | 6   | 6   | 13  | 14  | 13  | 13 |
| 16  | 22 | 19  | 57  | 57  | 49  | 46  | 49  | 63  | 22 |
| 46  | 39 | 58  | 141 | 154 | 167 | 175 | 148 | 173 | 85 |
| 25  | 30 | 18  | 14  | 35  | 22  | 30  | 30  | 37  | 24 |
| 15  | 14 | 16  | 12  | 19  | 14  | 19  | 21  | 19  | 9  |
| 19  | 24 | 15  | 7   | 11  | 6   | 9   | 9   | 14  | 13 |
| 31  | 19 | 23  | 26  | 27  | 21  | 21  | 26  | 29  | 27 |
| 40  | 37 | 35  | 44  | 66  | 53  | 54  | 51  | 63  | 40 |
| 108 | 92 | 115 | 130 | 168 | 160 | 161 | 141 | 173 | 90 |
| 34  | 42 | 50  | 91  | 79  | 98  | 50  | 51  | 62  | 43 |
| 45  | 46 | 41  | 59  | 58  | 52  | 42  | 42  | 40  | 37 |
| 41  | 46 | 48  | 27  | 39  | 35  | 25  | 21  | 20  | 20 |
| 29  | 16 | 35  | 34  | 26  | 34  | 28  | 28  | 29  | 26 |
| 20  | 19 | 17  | 33  | 57  | 47  | 32  | 32  | 37  | 27 |
| 28  | 42 | 35  | 20  | 26  | 32  | 28  | 16  | 19  | 17 |
| 38  | 25 | 39  | 56  | 60  | 57  | 63  | 65  | 62  | 39 |
| 28  | 28 | 20  | 24  | 25  | 11  | 15  | 23  | 24  | 30 |
| 24  | 26 | 29  | 53  | 90  | 55  | 64  | 47  | 56  | 31 |
| 35  | 24 | 29  | 22  | 24  | 31  | 25  | 15  | 17  | 19 |
| 48  | 29 | 62  | 64  | 72  | 49  | 59  | 53  | 72  | 47 |
| 50  | 40 | 45  | 29  | 48  | 41  | 40  | 32  | 59  | 41 |



|    |     |     |     |     |     |     |     |     |    |
|----|-----|-----|-----|-----|-----|-----|-----|-----|----|
| 25 | 27  | 32  | 44  | 61  | 67  | 67  | 41  | 64  | 31 |
| 33 | 24  | 22  | 16  | 40  | 27  | 15  | 24  | 16  | 19 |
| 49 | 60  | 49  | 87  | 109 | 96  | 83  | 64  | 79  | 52 |
| 33 | 30  | 28  | 40  | 41  | 42  | 35  | 26  | 32  | 25 |
| 43 | 27  | 34  | 77  | 76  | 58  | 103 | 122 | 120 | 69 |
| 27 | 29  | 27  | 38  | 46  | 28  | 39  | 39  | 38  | 18 |
| 32 | 33  | 39  | 63  | 73  | 69  | 66  | 82  | 47  | 39 |
| 26 | 26  | 32  | 44  | 53  | 53  | 53  | 33  | 46  | 34 |
| 48 | 34  | 55  | 68  | 75  | 85  | 65  | 50  | 64  | 45 |
| 30 | 29  | 29  | 183 | 203 | 161 | 169 | 170 | 194 | 72 |
| 14 | 19  | 11  | 29  | 30  | 32  | 36  | 28  | 30  | 17 |
| 50 | 60  | 59  | 84  | 105 | 77  | 77  | 69  | 87  | 55 |
| 38 | 35  | 42  | 25  | 30  | 28  | 28  | 20  | 22  | 14 |
| 35 | 37  | 40  | 83  | 101 | 106 | 78  | 81  | 72  | 53 |
| 45 | 42  | 56  | 54  | 59  | 73  | 84  | 89  | 82  | 44 |
| 25 | 27  | 21  | 26  | 52  | 34  | 37  | 20  | 27  | 27 |
| 57 | 52  | 62  | 63  | 70  | 62  | 74  | 69  | 68  | 52 |
| 33 | 31  | 31  | 51  | 45  | 42  | 50  | 45  | 62  | 37 |
| 56 | 32  | 60  | 36  | 48  | 34  | 53  | 43  | 48  | 39 |
| 30 | 31  | 38  | 37  | 46  | 43  | 31  | 25  | 32  | 34 |
| 80 | 82  | 112 | 172 | 227 | 203 | 202 | 157 | 191 | 99 |
| 58 | 45  | 53  | 105 | 124 | 101 | 70  | 54  | 79  | 52 |
| 23 | 26  | 40  | 19  | 23  | 16  | 27  | 25  | 22  | 26 |
| 36 | 28  | 31  | 61  | 87  | 72  | 47  | 43  | 46  | 36 |
| 39 | 46  | 53  | 40  | 41  | 51  | 45  | 47  | 52  | 44 |
| 34 | 23  | 29  | 26  | 38  | 24  | 32  | 34  | 47  | 21 |
| 37 | 27  | 39  | 56  | 59  | 51  | 46  | 50  | 47  | 31 |
| 27 | 28  | 28  | 27  | 45  | 33  | 29  | 30  | 46  | 27 |
| 95 | 118 | 99  | 126 | 147 | 100 | 133 | 157 | 155 | 75 |
| 29 | 24  | 35  | 49  | 50  | 67  | 34  | 50  | 41  | 33 |
| 32 | 39  | 30  | 68  | 70  | 58  | 58  | 47  | 55  | 35 |
| 55 | 46  | 43  | 53  | 72  | 36  | 62  | 57  | 70  | 48 |
| 40 | 40  | 40  | 93  | 110 | 92  | 117 | 114 | 126 | 62 |
| 15 | 15  | 14  | 17  | 18  | 14  | 14  | 7   | 14  | 19 |
| 39 | 41  | 44  | 39  | 46  | 45  | 37  | 27  | 43  | 33 |
| 69 | 60  | 72  | 117 | 141 | 130 | 114 | 120 | 146 | 77 |
| 40 | 35  | 39  | 39  | 56  | 43  | 55  | 29  | 38  | 27 |
| 23 | 31  | 22  | 33  | 30  | 31  | 35  | 30  | 44  | 36 |
| 28 | 25  | 38  | 109 | 127 | 104 | 81  | 91  | 98  | 51 |
| 33 | 35  | 31  | 33  | 35  | 25  | 22  | 23  | 22  | 36 |
| 36 | 32  | 47  | 55  | 67  | 63  | 74  | 58  | 64  | 42 |

|    |    |     |     |     |     |     |     |     |     |
|----|----|-----|-----|-----|-----|-----|-----|-----|-----|
| 27 | 22 | 37  | 27  | 43  | 32  | 29  | 34  | 31  | 29  |
| 32 | 26 | 41  | 60  | 66  | 61  | 36  | 24  | 34  | 32  |
| 28 | 31 | 29  | 15  | 22  | 18  | 24  | 33  | 29  | 22  |
| 24 | 21 | 28  | 23  | 33  | 26  | 17  | 18  | 18  | 15  |
| 39 | 37 | 35  | 30  | 74  | 56  | 37  | 37  | 40  | 26  |
| 57 | 51 | 57  | 133 | 175 | 165 | 97  | 87  | 124 | 69  |
| 24 | 28 | 34  | 38  | 55  | 46  | 63  | 48  | 51  | 38  |
| 25 | 22 | 28  | 13  | 21  | 19  | 15  | 17  | 18  | 14  |
| 26 | 21 | 32  | 51  | 84  | 73  | 43  | 44  | 37  | 31  |
| 28 | 34 | 30  | 76  | 111 | 93  | 79  | 78  | 80  | 38  |
| 49 | 45 | 42  | 232 | 243 | 220 | 286 | 238 | 235 | 121 |
| 62 | 61 | 70  | 200 | 280 | 223 | 192 | 172 | 184 | 85  |
| 16 | 15 | 19  | 30  | 40  | 33  | 27  | 23  | 38  | 15  |
| 35 | 50 | 32  | 133 | 183 | 136 | 137 | 125 | 145 | 74  |
| 38 | 29 | 20  | 21  | 18  | 23  | 14  | 18  | 16  | 25  |
| 78 | 70 | 104 | 100 | 120 | 113 | 115 | 111 | 115 | 87  |
| 54 | 53 | 49  | 113 | 150 | 111 | 108 | 96  | 101 | 57  |
| 41 | 37 | 41  | 48  | 72  | 53  | 45  | 49  | 55  | 46  |
| 32 | 35 | 31  | 38  | 62  | 58  | 46  | 40  | 42  | 25  |
| 41 | 40 | 46  | 43  | 72  | 60  | 33  | 36  | 46  | 35  |
| 29 | 20 | 22  | 28  | 39  | 29  | 21  | 27  | 30  | 30  |
| 26 | 40 | 42  | 53  | 62  | 47  | 46  | 45  | 47  | 38  |
| 57 | 48 | 62  | 97  | 115 | 88  | 79  | 78  | 73  | 50  |
| 31 | 34 | 29  | 28  | 44  | 35  | 42  | 39  | 49  | 21  |
| 25 | 27 | 21  | 24  | 29  | 36  | 30  | 16  | 19  | 36  |
| 49 | 36 | 51  | 98  | 105 | 86  | 80  | 70  | 87  | 48  |
| 32 | 34 | 27  | 23  | 30  | 18  | 20  | 30  | 30  | 39  |
| 13 | 8  | 10  | 25  | 17  | 19  | 13  | 14  | 23  | 11  |
| 55 | 61 | 65  | 62  | 88  | 65  | 71  | 52  | 78  | 54  |
| 38 | 43 | 34  | 41  | 69  | 48  | 59  | 40  | 41  | 39  |
| 33 | 34 | 54  | 49  | 73  | 45  | 41  | 26  | 44  | 29  |
| 65 | 86 | 71  | 81  | 102 | 105 | 72  | 83  | 68  | 51  |
| 58 | 54 | 49  | 95  | 84  | 107 | 89  | 85  | 77  | 49  |
| 43 | 38 | 39  | 37  | 67  | 50  | 53  | 51  | 56  | 43  |
| 16 | 21 | 16  | 10  | 15  | 16  | 15  | 13  | 15  | 15  |
| 34 | 36 | 35  | 98  | 124 | 76  | 95  | 82  | 79  | 44  |
| 48 | 48 | 63  | 50  | 54  | 52  | 59  | 45  | 57  | 49  |
| 18 | 13 | 20  | 8   | 14  | 12  | 17  | 13  | 16  | 20  |
| 38 | 36 | 45  | 54  | 79  | 48  | 71  | 67  | 71  | 43  |
| 24 | 20 | 28  | 35  | 30  | 28  | 26  | 25  | 21  | 20  |
| 30 | 35 | 30  | 17  | 28  | 25  | 33  | 28  | 43  | 26  |

|     |     |     |     |     |     |     |     |     |     |
|-----|-----|-----|-----|-----|-----|-----|-----|-----|-----|
| 26  | 28  | 29  | 24  | 23  | 20  | 25  | 33  | 35  | 21  |
| 24  | 28  | 22  | 21  | 33  | 21  | 21  | 14  | 29  | 22  |
| 21  | 27  | 30  | 55  | 58  | 67  | 86  | 54  | 69  | 36  |
| 32  | 45  | 38  | 61  | 67  | 56  | 53  | 38  | 54  | 39  |
| 39  | 32  | 44  | 35  | 38  | 42  | 34  | 33  | 42  | 28  |
| 51  | 38  | 43  | 42  | 53  | 64  | 71  | 37  | 50  | 36  |
| 18  | 18  | 20  | 21  | 17  | 25  | 22  | 18  | 18  | 16  |
| 47  | 41  | 45  | 33  | 35  | 32  | 44  | 24  | 37  | 44  |
| 1   | 2   | 2   | 0   | 1   | 2   | 1   | 3   | 1   | 1   |
| 43  | 41  | 45  | 27  | 36  | 17  | 45  | 38  | 39  | 37  |
| 33  | 55  | 43  | 69  | 65  | 72  | 80  | 48  | 66  | 39  |
| 10  | 17  | 12  | 8   | 7   | 8   | 7   | 12  | 11  | 14  |
| 10  | 13  | 22  | 32  | 35  | 24  | 28  | 30  | 30  | 15  |
| 56  | 48  | 64  | 72  | 61  | 65  | 52  | 70  | 50  | 49  |
| 39  | 45  | 31  | 58  | 78  | 72  | 80  | 60  | 59  | 46  |
| 45  | 40  | 55  | 53  | 56  | 45  | 36  | 26  | 38  | 40  |
| 27  | 28  | 27  | 80  | 105 | 87  | 101 | 98  | 107 | 46  |
| 125 | 107 | 135 | 225 | 279 | 246 | 301 | 272 | 253 | 183 |
| 10  | 21  | 16  | 14  | 13  | 15  | 13  | 6   | 11  | 6   |
| 27  | 32  | 32  | 56  | 63  | 68  | 50  | 37  | 49  | 34  |
| 13  | 13  | 16  | 8   | 12  | 8   | 11  | 9   | 15  | 13  |
| 37  | 32  | 45  | 46  | 50  | 36  | 38  | 29  | 39  | 20  |
| 59  | 44  | 62  | 119 | 153 | 140 | 123 | 98  | 108 | 80  |
| 39  | 43  | 31  | 45  | 51  | 63  | 36  | 38  | 68  | 31  |
| 39  | 25  | 45  | 52  | 64  | 55  | 37  | 44  | 50  | 43  |
| 29  | 41  | 31  | 42  | 34  | 34  | 34  | 28  | 34  | 29  |
| 44  | 37  | 50  | 62  | 74  | 61  | 56  | 51  | 50  | 32  |
| 10  | 21  | 18  | 43  | 60  | 52  | 27  | 36  | 38  | 18  |
| 6   | 8   | 7   | 16  | 9   | 23  | 11  | 14  | 9   | 9   |
| 70  | 73  | 68  | 145 | 188 | 133 | 117 | 118 | 123 | 79  |
| 60  | 48  | 53  | 102 | 124 | 98  | 105 | 111 | 87  | 67  |
| 19  | 13  | 33  | 26  | 38  | 31  | 32  | 24  | 27  | 16  |
| 30  | 32  | 32  | 54  | 67  | 61  | 44  | 42  | 40  | 34  |
| 40  | 51  | 52  | 17  | 26  | 17  | 24  | 18  | 22  | 16  |
| 20  | 27  | 20  | 56  | 44  | 38  | 41  | 34  | 45  | 26  |
| 19  | 18  | 19  | 11  | 20  | 21  | 17  | 17  | 13  | 14  |
| 45  | 47  | 50  | 127 | 166 | 124 | 137 | 115 | 138 | 72  |
| 53  | 79  | 66  | 265 | 365 | 289 | 305 | 256 | 298 | 130 |
| 35  | 37  | 32  | 53  | 54  | 46  | 49  | 51  | 41  | 30  |
| 37  | 42  | 41  | 75  | 108 | 92  | 92  | 74  | 86  | 58  |
| 51  | 58  | 38  | 69  | 83  | 74  | 52  | 40  | 54  | 33  |

|     |     |     |     |     |     |     |     |     |     |
|-----|-----|-----|-----|-----|-----|-----|-----|-----|-----|
| 124 | 123 | 121 | 101 | 108 | 125 | 132 | 115 | 131 | 125 |
| 167 | 184 | 184 | 87  | 114 | 101 | 106 | 87  | 86  | 65  |
| 47  | 37  | 55  | 32  | 60  | 43  | 54  | 56  | 46  | 42  |
| 27  | 14  | 17  | 58  | 70  | 67  | 46  | 35  | 56  | 27  |
| 21  | 16  | 15  | 10  | 23  | 17  | 13  | 19  | 16  | 6   |
| 32  | 23  | 41  | 87  | 119 | 80  | 73  | 75  | 67  | 41  |
| 29  | 29  | 27  | 38  | 56  | 50  | 31  | 42  | 46  | 39  |
| 10  | 6   | 14  | 11  | 11  | 13  | 15  | 13  | 11  | 8   |
| 21  | 31  | 17  | 23  | 32  | 32  | 32  | 33  | 27  | 21  |
| 45  | 41  | 33  | 21  | 24  | 24  | 26  | 21  | 22  | 18  |
| 33  | 41  | 41  | 55  | 81  | 64  | 52  | 45  | 61  | 44  |
| 60  | 63  | 57  | 155 | 210 | 183 | 188 | 170 | 167 | 85  |
| 57  | 49  | 43  | 114 | 137 | 104 | 118 | 80  | 91  | 48  |
| 36  | 35  | 47  | 78  | 97  | 70  | 60  | 55  | 45  | 33  |
| 61  | 74  | 64  | 58  | 59  | 61  | 50  | 38  | 44  | 34  |
| 37  | 37  | 33  | 163 | 261 | 233 | 221 | 193 | 211 | 76  |
| 27  | 19  | 26  | 30  | 39  | 40  | 37  | 42  | 48  | 28  |
| 3   | 2   | 6   | 3   | 6   | 1   | 3   | 1   | 1   | 2   |
| 45  | 48  | 51  | 78  | 88  | 88  | 69  | 63  | 60  | 48  |
| 41  | 42  | 36  | 47  | 33  | 39  | 48  | 38  | 38  | 37  |
| 20  | 15  | 17  | 14  | 9   | 14  | 15  | 17  | 9   | 14  |
| 9   | 12  | 8   | 55  | 75  | 35  | 40  | 39  | 56  | 14  |
| 31  | 44  | 36  | 27  | 32  | 45  | 29  | 20  | 28  | 26  |
| 74  | 81  | 71  | 139 | 169 | 141 | 136 | 114 | 111 | 72  |
| 68  | 74  | 81  | 39  | 49  | 48  | 38  | 41  | 30  | 29  |
| 42  | 47  | 50  | 101 | 127 | 96  | 58  | 73  | 61  | 45  |
| 42  | 46  | 59  | 43  | 61  | 36  | 65  | 54  | 61  | 41  |
| 30  | 40  | 42  | 51  | 59  | 53  | 58  | 48  | 54  | 40  |
| 32  | 27  | 22  | 36  | 42  | 19  | 30  | 28  | 35  | 30  |
| 33  | 31  | 26  | 52  | 75  | 52  | 58  | 37  | 53  | 37  |
| 19  | 14  | 19  | 23  | 25  | 29  | 31  | 14  | 24  | 24  |
| 43  | 34  | 45  | 49  | 81  | 73  | 78  | 63  | 63  | 56  |
| 16  | 21  | 19  | 7   | 11  | 12  | 14  | 10  | 15  | 5   |
| 21  | 37  | 40  | 42  | 36  | 38  | 44  | 42  | 49  | 37  |
| 43  | 36  | 45  | 38  | 50  | 43  | 47  | 50  | 57  | 34  |
| 21  | 21  | 23  | 34  | 29  | 25  | 36  | 30  | 35  | 29  |
| 34  | 33  | 29  | 42  | 52  | 49  | 46  | 33  | 41  | 28  |
| 16  | 24  | 35  | 29  | 45  | 32  | 22  | 16  | 21  | 20  |
| 56  | 48  | 53  | 69  | 78  | 58  | 64  | 54  | 72  | 51  |
| 18  | 13  | 22  | 43  | 50  | 46  | 16  | 10  | 13  | 14  |
| 41  | 23  | 33  | 111 | 140 | 117 | 151 | 158 | 156 | 65  |

|    |     |     |     |     |     |     |     |     |     |
|----|-----|-----|-----|-----|-----|-----|-----|-----|-----|
| 39 | 41  | 29  | 45  | 75  | 70  | 47  | 32  | 60  | 48  |
| 90 | 105 | 110 | 109 | 170 | 121 | 124 | 113 | 140 | 101 |
| 33 | 20  | 26  | 23  | 18  | 32  | 22  | 22  | 19  | 24  |
| 38 | 33  | 47  | 24  | 33  | 19  | 37  | 41  | 31  | 24  |
| 31 | 30  | 32  | 41  | 68  | 55  | 43  | 44  | 47  | 26  |
| 15 | 23  | 21  | 21  | 23  | 12  | 13  | 12  | 22  | 26  |
| 21 | 29  | 27  | 65  | 90  | 74  | 82  | 74  | 78  | 48  |
| 36 | 58  | 47  | 71  | 86  | 83  | 77  | 57  | 74  | 42  |
| 28 | 30  | 23  | 25  | 36  | 29  | 17  | 17  | 15  | 16  |
| 45 | 49  | 51  | 75  | 96  | 77  | 70  | 57  | 56  | 51  |
| 34 | 36  | 35  | 38  | 32  | 31  | 31  | 23  | 28  | 19  |
| 38 | 60  | 36  | 192 | 244 | 225 | 196 | 204 | 197 | 96  |
| 29 | 26  | 21  | 65  | 81  | 71  | 75  | 55  | 56  | 41  |
| 26 | 26  | 41  | 68  | 129 | 91  | 68  | 56  | 79  | 37  |
| 28 | 32  | 40  | 24  | 31  | 30  | 35  | 27  | 32  | 29  |
| 93 | 108 | 111 | 127 | 174 | 166 | 294 | 267 | 302 | 126 |
| 21 | 24  | 23  | 47  | 47  | 49  | 33  | 35  | 40  | 33  |
| 29 | 43  | 45  | 67  | 99  | 84  | 43  | 37  | 58  | 25  |
| 20 | 26  | 18  | 13  | 25  | 14  | 16  | 10  | 16  | 10  |
| 42 | 36  | 44  | 67  | 82  | 77  | 67  | 62  | 65  | 33  |
| 68 | 58  | 82  | 75  | 102 | 75  | 78  | 76  | 67  | 61  |
| 36 | 36  | 25  | 37  | 58  | 50  | 48  | 41  | 31  | 34  |
| 38 | 26  | 28  | 53  | 62  | 46  | 47  | 25  | 24  | 29  |
| 43 | 42  | 40  | 55  | 76  | 64  | 69  | 58  | 70  | 57  |
| 16 | 12  | 18  | 19  | 34  | 25  | 18  | 14  | 22  | 19  |
| 46 | 57  | 61  | 106 | 132 | 121 | 118 | 83  | 121 | 64  |
| 31 | 23  | 25  | 29  | 18  | 31  | 25  | 17  | 32  | 21  |
| 19 | 18  | 26  | 98  | 100 | 114 | 63  | 38  | 35  | 43  |
| 31 | 41  | 55  | 63  | 78  | 60  | 69  | 64  | 67  | 41  |
| 19 | 16  | 20  | 10  | 14  | 24  | 17  | 18  | 14  | 19  |
| 24 | 30  | 33  | 57  | 85  | 60  | 49  | 44  | 48  | 28  |
| 13 | 11  | 18  | 7   | 4   | 9   | 10  | 10  | 10  | 18  |
| 14 | 18  | 33  | 18  | 23  | 32  | 25  | 17  | 20  | 20  |
| 54 | 45  | 41  | 65  | 76  | 86  | 64  | 60  | 66  | 45  |
| 54 | 47  | 49  | 60  | 70  | 58  | 66  | 68  | 76  | 45  |
| 33 | 38  | 48  | 68  | 90  | 94  | 73  | 81  | 68  | 44  |
| 15 | 9   | 12  | 24  | 29  | 31  | 27  | 21  | 26  | 10  |
| 22 | 24  | 36  | 14  | 26  | 25  | 25  | 27  | 20  | 14  |
| 23 | 27  | 20  | 114 | 161 | 149 | 122 | 94  | 115 | 45  |
| 14 | 13  | 22  | 51  | 68  | 54  | 46  | 52  | 59  | 23  |
| 45 | 45  | 46  | 65  | 111 | 85  | 55  | 73  | 56  | 46  |

|    |     |    |     |     |     |     |     |     |     |
|----|-----|----|-----|-----|-----|-----|-----|-----|-----|
| 49 | 61  | 63 | 76  | 88  | 100 | 121 | 119 | 123 | 61  |
| 30 | 35  | 37 | 19  | 33  | 20  | 31  | 32  | 32  | 22  |
| 54 | 40  | 36 | 123 | 142 | 122 | 108 | 84  | 102 | 49  |
| 10 | 7   | 9  | 6   | 9   | 5   | 7   | 5   | 8   | 8   |
| 24 | 25  | 27 | 61  | 75  | 66  | 51  | 41  | 51  | 35  |
| 58 | 72  | 82 | 37  | 86  | 60  | 60  | 66  | 70  | 35  |
| 27 | 32  | 29 | 35  | 27  | 19  | 23  | 31  | 29  | 32  |
| 51 | 49  | 67 | 45  | 74  | 44  | 75  | 72  | 66  | 53  |
| 26 | 38  | 36 | 56  | 83  | 86  | 79  | 83  | 64  | 52  |
| 13 | 7   | 16 | 8   | 14  | 10  | 12  | 12  | 8   | 10  |
| 74 | 58  | 83 | 89  | 101 | 91  | 67  | 72  | 76  | 48  |
| 16 | 13  | 23 | 25  | 42  | 45  | 29  | 30  | 24  | 17  |
| 45 | 55  | 50 | 38  | 56  | 64  | 57  | 51  | 59  | 44  |
| 56 | 73  | 57 | 104 | 168 | 149 | 111 | 92  | 109 | 62  |
| 23 | 7   | 18 | 13  | 17  | 16  | 15  | 15  | 16  | 13  |
| 45 | 44  | 34 | 43  | 57  | 43  | 64  | 51  | 61  | 31  |
| 52 | 52  | 57 | 67  | 91  | 62  | 37  | 52  | 55  | 38  |
| 42 | 50  | 50 | 46  | 37  | 38  | 46  | 59  | 53  | 42  |
| 23 | 28  | 22 | 26  | 25  | 34  | 17  | 16  | 15  | 14  |
| 27 | 37  | 31 | 25  | 20  | 15  | 33  | 31  | 30  | 19  |
| 17 | 21  | 34 | 70  | 121 | 88  | 84  | 79  | 80  | 33  |
| 12 | 17  | 7  | 6   | 28  | 9   | 13  | 8   | 6   | 7   |
| 26 | 33  | 32 | 64  | 86  | 88  | 85  | 78  | 64  | 41  |
| 33 | 46  | 50 | 32  | 36  | 47  | 48  | 27  | 30  | 36  |
| 51 | 49  | 60 | 50  | 45  | 46  | 40  | 23  | 33  | 23  |
| 17 | 22  | 25 | 20  | 25  | 18  | 16  | 17  | 23  | 19  |
| 8  | 11  | 17 | 21  | 25  | 18  | 22  | 23  | 16  | 19  |
| 28 | 32  | 32 | 55  | 71  | 64  | 65  | 64  | 67  | 36  |
| 41 | 50  | 37 | 51  | 59  | 78  | 44  | 46  | 35  | 46  |
| 35 | 33  | 43 | 56  | 62  | 46  | 48  | 34  | 32  | 29  |
| 34 | 21  | 37 | 39  | 66  | 55  | 50  | 45  | 49  | 29  |
| 11 | 11  | 17 | 12  | 30  | 15  | 21  | 14  | 10  | 19  |
| 35 | 39  | 42 | 55  | 54  | 60  | 39  | 45  | 41  | 46  |
| 40 | 39  | 48 | 29  | 43  | 38  | 36  | 26  | 41  | 36  |
| 78 | 88  | 89 | 42  | 62  | 45  | 48  | 41  | 36  | 30  |
| 25 | 16  | 18 | 25  | 47  | 33  | 38  | 26  | 27  | 16  |
| 41 | 49  | 38 | 57  | 54  | 48  | 37  | 31  | 32  | 30  |
| 39 | 37  | 36 | 47  | 48  | 59  | 45  | 46  | 64  | 47  |
| 18 | 16  | 10 | 15  | 14  | 12  | 4   | 3   | 13  | 15  |
| 99 | 102 | 82 | 147 | 181 | 178 | 137 | 134 | 140 | 100 |
| 40 | 42  | 42 | 134 | 176 | 177 | 148 | 128 | 150 | 81  |

|    |    |    |     |     |     |     |     |     |     |
|----|----|----|-----|-----|-----|-----|-----|-----|-----|
| 22 | 18 | 37 | 31  | 31  | 34  | 32  | 24  | 24  | 28  |
| 38 | 37 | 31 | 94  | 111 | 111 | 95  | 102 | 87  | 53  |
| 13 | 11 | 9  | 6   | 14  | 10  | 8   | 10  | 10  | 9   |
| 14 | 18 | 17 | 19  | 20  | 19  | 12  | 18  | 27  | 18  |
| 35 | 24 | 49 | 26  | 44  | 46  | 55  | 61  | 59  | 39  |
| 54 | 61 | 57 | 206 | 253 | 213 | 230 | 212 | 214 | 109 |
| 21 | 21 | 20 | 25  | 29  | 31  | 21  | 19  | 18  | 23  |
| 22 | 31 | 34 | 28  | 27  | 24  | 22  | 25  | 29  | 28  |
| 31 | 26 | 29 | 24  | 33  | 29  | 36  | 24  | 35  | 20  |
| 23 | 17 | 35 | 30  | 38  | 36  | 22  | 24  | 23  | 19  |
| 15 | 15 | 13 | 12  | 17  | 10  | 9   | 12  | 14  | 11  |
| 16 | 15 | 21 | 21  | 38  | 33  | 51  | 44  | 33  | 17  |
| 25 | 30 | 25 | 30  | 50  | 56  | 52  | 43  | 50  | 17  |
| 33 | 31 | 41 | 16  | 24  | 24  | 30  | 28  | 15  | 19  |
| 57 | 67 | 58 | 112 | 154 | 128 | 92  | 78  | 66  | 64  |
| 9  | 11 | 7  | 8   | 12  | 6   | 14  | 15  | 8   | 12  |
| 57 | 61 | 74 | 51  | 75  | 69  | 68  | 63  | 55  | 43  |
| 37 | 34 | 34 | 52  | 76  | 80  | 58  | 45  | 43  | 36  |
| 39 | 39 | 54 | 47  | 61  | 37  | 49  | 45  | 44  | 32  |
| 29 | 23 | 26 | 28  | 40  | 29  | 29  | 41  | 45  | 30  |
| 50 | 51 | 48 | 47  | 46  | 56  | 40  | 45  | 36  | 58  |
| 38 | 23 | 32 | 48  | 75  | 40  | 58  | 52  | 48  | 25  |
| 10 | 9  | 21 | 16  | 21  | 15  | 16  | 10  | 16  | 10  |
| 45 | 65 | 67 | 124 | 131 | 130 | 105 | 84  | 109 | 34  |
| 34 | 32 | 36 | 39  | 50  | 35  | 70  | 49  | 56  | 36  |
| 45 | 43 | 67 | 33  | 47  | 40  | 47  | 47  | 57  | 50  |
| 15 | 24 | 21 | 33  | 45  | 36  | 28  | 28  | 32  | 27  |
| 18 | 25 | 27 | 23  | 34  | 31  | 25  | 25  | 39  | 27  |
| 37 | 43 | 29 | 41  | 49  | 32  | 66  | 60  | 72  | 37  |
| 10 | 9  | 8  | 8   | 8   | 9   | 13  | 12  | 16  | 12  |
| 51 | 50 | 56 | 42  | 35  | 31  | 46  | 49  | 43  | 36  |
| 54 | 60 | 56 | 75  | 62  | 55  | 65  | 62  | 53  | 52  |
| 44 | 51 | 40 | 99  | 112 | 124 | 117 | 102 | 112 | 72  |
| 37 | 57 | 60 | 62  | 66  | 67  | 64  | 43  | 73  | 49  |
| 41 | 41 | 56 | 70  | 97  | 83  | 71  | 53  | 71  | 42  |
| 31 | 43 | 47 | 57  | 80  | 47  | 52  | 46  | 47  | 36  |
| 47 | 46 | 38 | 51  | 69  | 51  | 74  | 51  | 57  | 48  |
| 20 | 27 | 24 | 27  | 25  | 35  | 24  | 15  | 22  | 17  |
| 23 | 21 | 28 | 64  | 60  | 60  | 69  | 68  | 58  | 34  |
| 40 | 29 | 29 | 36  | 38  | 34  | 21  | 26  | 22  | 31  |
| 23 | 22 | 26 | 33  | 31  | 36  | 25  | 29  | 39  | 28  |

|    |     |     |     |     |     |     |     |     |    |
|----|-----|-----|-----|-----|-----|-----|-----|-----|----|
| 12 | 18  | 10  | 8   | 15  | 16  | 7   | 7   | 17  | 8  |
| 36 | 39  | 42  | 54  | 53  | 74  | 58  | 73  | 69  | 40 |
| 42 | 48  | 47  | 187 | 224 | 190 | 223 | 186 | 232 | 92 |
| 60 | 42  | 47  | 56  | 70  | 65  | 50  | 58  | 69  | 42 |
| 35 | 34  | 51  | 32  | 33  | 36  | 28  | 21  | 36  | 28 |
| 72 | 68  | 74  | 45  | 54  | 45  | 39  | 46  | 54  | 42 |
| 14 | 25  | 18  | 8   | 5   | 9   | 10  | 11  | 12  | 10 |
| 27 | 32  | 12  | 85  | 94  | 60  | 65  | 46  | 44  | 17 |
| 35 | 28  | 45  | 49  | 60  | 59  | 51  | 48  | 69  | 25 |
| 30 | 25  | 26  | 31  | 45  | 44  | 50  | 33  | 57  | 26 |
| 12 | 18  | 16  | 16  | 16  | 17  | 24  | 16  | 22  | 14 |
| 25 | 22  | 35  | 29  | 37  | 33  | 37  | 30  | 33  | 26 |
| 40 | 36  | 39  | 26  | 30  | 37  | 37  | 29  | 42  | 31 |
| 41 | 35  | 52  | 69  | 82  | 72  | 80  | 65  | 77  | 64 |
| 14 | 17  | 16  | 15  | 20  | 18  | 17  | 17  | 17  | 26 |
| 42 | 44  | 47  | 204 | 272 | 239 | 221 | 182 | 187 | 89 |
| 47 | 61  | 52  | 72  | 73  | 87  | 67  | 44  | 63  | 52 |
| 26 | 26  | 31  | 21  | 30  | 24  | 16  | 23  | 17  | 21 |
| 50 | 43  | 44  | 88  | 104 | 69  | 83  | 68  | 80  | 47 |
| 35 | 25  | 30  | 45  | 43  | 54  | 46  | 25  | 41  | 27 |
| 26 | 47  | 38  | 32  | 26  | 21  | 24  | 37  | 29  | 28 |
| 79 | 75  | 86  | 131 | 194 | 147 | 153 | 140 | 125 | 69 |
| 50 | 42  | 53  | 137 | 195 | 143 | 117 | 115 | 126 | 71 |
| 42 | 45  | 37  | 115 | 138 | 125 | 110 | 99  | 94  | 53 |
| 46 | 29  | 31  | 50  | 61  | 58  | 72  | 60  | 63  | 46 |
| 30 | 33  | 39  | 50  | 44  | 33  | 36  | 27  | 34  | 32 |
| 77 | 71  | 72  | 98  | 108 | 98  | 124 | 111 | 128 | 58 |
| 43 | 47  | 36  | 44  | 55  | 45  | 49  | 35  | 52  | 41 |
| 22 | 18  | 22  | 18  | 19  | 13  | 23  | 22  | 26  | 10 |
| 79 | 87  | 103 | 118 | 148 | 145 | 117 | 104 | 138 | 66 |
| 56 | 54  | 51  | 48  | 72  | 51  | 52  | 55  | 71  | 45 |
| 18 | 12  | 13  | 22  | 22  | 25  | 14  | 12  | 15  | 18 |
| 27 | 18  | 31  | 20  | 29  | 24  | 26  | 24  | 28  | 24 |
| 8  | 7   | 9   | 6   | 6   | 7   | 10  | 9   | 8   | 6  |
| 45 | 41  | 57  | 42  | 53  | 42  | 70  | 36  | 50  | 38 |
| 57 | 56  | 58  | 193 | 269 | 253 | 200 | 154 | 236 | 91 |
| 19 | 19  | 19  | 16  | 24  | 17  | 16  | 18  | 17  | 17 |
| 20 | 23  | 35  | 28  | 38  | 33  | 40  | 29  | 26  | 16 |
| 81 | 76  | 83  | 113 | 134 | 125 | 89  | 85  | 102 | 68 |
| 35 | 39  | 42  | 58  | 80  | 84  | 89  | 69  | 66  | 30 |
| 78 | 122 | 120 | 88  | 105 | 89  | 115 | 83  | 93  | 76 |



|     |     |     |     |     |     |     |     |     |     |
|-----|-----|-----|-----|-----|-----|-----|-----|-----|-----|
| 73  | 80  | 72  | 53  | 76  | 58  | 60  | 71  | 77  | 46  |
| 31  | 28  | 30  | 71  | 104 | 104 | 82  | 61  | 73  | 47  |
| 4   | 4   | 5   | 5   | 4   | 5   | 0   | 5   | 8   | 5   |
| 40  | 64  | 58  | 89  | 116 | 86  | 81  | 74  | 72  | 56  |
| 22  | 21  | 29  | 27  | 32  | 38  | 31  | 36  | 42  | 22  |
| 34  | 40  | 37  | 86  | 93  | 104 | 64  | 72  | 72  | 47  |
| 23  | 28  | 16  | 20  | 35  | 24  | 29  | 24  | 30  | 30  |
| 22  | 24  | 29  | 8   | 8   | 20  | 18  | 20  | 17  | 18  |
| 87  | 59  | 55  | 159 | 209 | 209 | 164 | 151 | 144 | 76  |
| 42  | 34  | 41  | 46  | 57  | 52  | 43  | 39  | 45  | 40  |
| 40  | 25  | 37  | 36  | 64  | 36  | 36  | 63  | 53  | 23  |
| 25  | 25  | 23  | 50  | 56  | 58  | 54  | 51  | 42  | 34  |
| 48  | 60  | 51  | 258 | 332 | 279 | 317 | 296 | 287 | 121 |
| 13  | 15  | 23  | 51  | 72  | 38  | 57  | 50  | 54  | 34  |
| 35  | 27  | 37  | 45  | 71  | 43  | 56  | 42  | 60  | 23  |
| 4   | 2   | 6   | 12  | 19  | 7   | 3   | 4   | 6   | 6   |
| 18  | 24  | 26  | 96  | 125 | 84  | 90  | 85  | 85  | 32  |
| 46  | 39  | 59  | 27  | 34  | 28  | 37  | 36  | 31  | 44  |
| 26  | 17  | 22  | 115 | 141 | 101 | 62  | 63  | 79  | 30  |
| 53  | 41  | 47  | 41  | 51  | 47  | 43  | 38  | 37  | 40  |
| 55  | 73  | 53  | 151 | 186 | 147 | 174 | 129 | 128 | 77  |
| 54  | 76  | 81  | 99  | 113 | 93  | 114 | 82  | 97  | 70  |
| 28  | 32  | 36  | 20  | 31  | 23  | 24  | 30  | 22  | 21  |
| 53  | 52  | 50  | 41  | 55  | 37  | 36  | 34  | 34  | 26  |
| 17  | 36  | 27  | 47  | 74  | 43  | 37  | 32  | 44  | 22  |
| 22  | 19  | 25  | 22  | 23  | 27  | 18  | 19  | 18  | 18  |
| 9   | 14  | 14  | 15  | 17  | 15  | 11  | 15  | 14  | 8   |
| 29  | 31  | 29  | 39  | 38  | 35  | 33  | 29  | 31  | 16  |
| 38  | 35  | 25  | 20  | 37  | 23  | 35  | 20  | 29  | 24  |
| 25  | 19  | 29  | 24  | 26  | 27  | 18  | 19  | 22  | 24  |
| 120 | 115 | 127 | 101 | 142 | 124 | 158 | 114 | 140 | 111 |
| 40  | 33  | 35  | 58  | 77  | 78  | 77  | 52  | 59  | 30  |
| 27  | 30  | 30  | 39  | 54  | 44  | 42  | 25  | 30  | 20  |
| 23  | 17  | 33  | 50  | 50  | 42  | 37  | 37  | 29  | 27  |
| 45  | 29  | 43  | 69  | 81  | 72  | 72  | 62  | 80  | 35  |
| 31  | 25  | 37  | 15  | 12  | 16  | 22  | 14  | 21  | 25  |
| 18  | 22  | 13  | 12  | 19  | 7   | 15  | 9   | 17  | 13  |
| 20  | 38  | 35  | 29  | 33  | 40  | 34  | 31  | 27  | 25  |
| 31  | 31  | 28  | 68  | 88  | 78  | 103 | 73  | 77  | 52  |
| 13  | 18  | 10  | 14  | 8   | 13  | 11  | 12  | 12  | 14  |
| 24  | 16  | 28  | 12  | 7   | 11  | 11  | 14  | 10  | 11  |

|     |     |     |     |     |     |     |     |     |     |
|-----|-----|-----|-----|-----|-----|-----|-----|-----|-----|
| 30  | 34  | 20  | 52  | 81  | 70  | 65  | 50  | 63  | 49  |
| 21  | 16  | 21  | 32  | 28  | 34  | 38  | 33  | 40  | 27  |
| 39  | 34  | 47  | 27  | 31  | 29  | 43  | 26  | 41  | 26  |
| 13  | 16  | 17  | 7   | 13  | 6   | 10  | 7   | 11  | 8   |
| 19  | 20  | 29  | 16  | 26  | 31  | 29  | 21  | 37  | 29  |
| 44  | 39  | 45  | 50  | 42  | 61  | 60  | 47  | 56  | 30  |
| 16  | 21  | 15  | 23  | 28  | 20  | 23  | 13  | 21  | 21  |
| 20  | 20  | 34  | 33  | 52  | 39  | 67  | 59  | 57  | 32  |
| 76  | 72  | 69  | 152 | 149 | 126 | 140 | 134 | 114 | 82  |
| 21  | 22  | 26  | 20  | 24  | 26  | 30  | 20  | 30  | 30  |
| 9   | 11  | 14  | 10  | 15  | 16  | 5   | 21  | 7   | 17  |
| 95  | 99  | 73  | 84  | 91  | 110 | 147 | 139 | 127 | 86  |
| 9   | 21  | 20  | 43  | 62  | 62  | 60  | 65  | 55  | 33  |
| 28  | 27  | 18  | 28  | 27  | 23  | 31  | 30  | 44  | 29  |
| 18  | 17  | 23  | 10  | 22  | 24  | 32  | 19  | 23  | 8   |
| 8   | 15  | 20  | 14  | 16  | 14  | 13  | 7   | 13  | 10  |
| 52  | 42  | 36  | 205 | 259 | 209 | 220 | 186 | 180 | 89  |
| 51  | 54  | 55  | 67  | 68  | 79  | 76  | 55  | 72  | 62  |
| 28  | 21  | 21  | 49  | 65  | 63  | 76  | 59  | 82  | 34  |
| 66  | 55  | 69  | 60  | 99  | 74  | 51  | 53  | 57  | 25  |
| 15  | 17  | 21  | 17  | 33  | 19  | 21  | 22  | 22  | 22  |
| 36  | 42  | 46  | 52  | 64  | 55  | 51  | 39  | 50  | 37  |
| 111 | 121 | 133 | 149 | 194 | 168 | 152 | 124 | 131 | 108 |
| 25  | 29  | 52  | 67  | 76  | 69  | 67  | 53  | 59  | 37  |
| 37  | 49  | 45  | 135 | 184 | 122 | 123 | 110 | 110 | 55  |
| 33  | 38  | 50  | 107 | 162 | 133 | 112 | 91  | 139 | 69  |
| 62  | 67  | 52  | 121 | 125 | 162 | 157 | 145 | 135 | 72  |
| 36  | 41  | 52  | 81  | 102 | 106 | 81  | 69  | 68  | 49  |
| 23  | 28  | 21  | 42  | 59  | 55  | 38  | 42  | 56  | 33  |
| 13  | 18  | 14  | 30  | 29  | 29  | 36  | 16  | 29  | 22  |
| 33  | 42  | 38  | 43  | 75  | 42  | 56  | 50  | 59  | 44  |
| 29  | 17  | 31  | 48  | 49  | 36  | 52  | 42  | 55  | 35  |
| 20  | 21  | 25  | 19  | 24  | 19  | 21  | 15  | 15  | 8   |
| 41  | 30  | 40  | 120 | 129 | 130 | 94  | 100 | 122 | 50  |
| 29  | 42  | 63  | 69  | 108 | 79  | 93  | 74  | 68  | 39  |
| 52  | 45  | 49  | 176 | 222 | 162 | 168 | 122 | 138 | 66  |
| 42  | 23  | 33  | 24  | 34  | 34  | 35  | 17  | 32  | 26  |
| 23  | 29  | 25  | 52  | 50  | 63  | 62  | 37  | 60  | 32  |
| 35  | 27  | 39  | 50  | 69  | 44  | 48  | 40  | 39  | 36  |
| 35  | 41  | 40  | 93  | 130 | 123 | 105 | 120 | 112 | 56  |
| 48  | 53  | 46  | 109 | 123 | 107 | 110 | 91  | 123 | 71  |

|    |    |    |    |     |     |     |     |     |    |
|----|----|----|----|-----|-----|-----|-----|-----|----|
| 15 | 20 | 10 | 4  | 5   | 9   | 7   | 14  | 16  | 12 |
| 28 | 37 | 30 | 41 | 52  | 37  | 31  | 26  | 40  | 32 |
| 35 | 40 | 39 | 56 | 59  | 43  | 40  | 34  | 32  | 28 |
| 32 | 32 | 50 | 38 | 28  | 35  | 26  | 38  | 46  | 21 |
| 20 | 18 | 26 | 24 | 16  | 32  | 25  | 19  | 27  | 15 |
| 52 | 60 | 70 | 70 | 95  | 77  | 73  | 58  | 75  | 48 |
| 61 | 47 | 60 | 70 | 102 | 103 | 81  | 72  | 76  | 55 |
| 8  | 5  | 5  | 12 | 11  | 11  | 14  | 10  | 9   | 13 |
| 38 | 32 | 40 | 40 | 35  | 44  | 39  | 35  | 45  | 26 |
| 37 | 47 | 35 | 48 | 87  | 67  | 74  | 70  | 65  | 43 |
| 22 | 21 | 17 | 23 | 40  | 33  | 27  | 24  | 29  | 22 |
| 27 | 15 | 30 | 49 | 84  | 60  | 58  | 74  | 84  | 30 |
| 40 | 52 | 37 | 48 | 43  | 52  | 41  | 45  | 57  | 39 |
| 52 | 57 | 50 | 81 | 99  | 89  | 87  | 90  | 106 | 64 |
| 68 | 59 | 65 | 81 | 96  | 90  | 84  | 52  | 53  | 62 |
| 26 | 29 | 31 | 22 | 29  | 29  | 29  | 24  | 27  | 24 |
| 24 | 18 | 33 | 21 | 31  | 31  | 31  | 37  | 35  | 18 |
| 24 | 16 | 31 | 57 | 76  | 45  | 52  | 54  | 59  | 30 |
| 15 | 12 | 14 | 20 | 16  | 12  | 8   | 15  | 15  | 12 |
| 28 | 28 | 38 | 67 | 90  | 64  | 61  | 43  | 50  | 51 |
| 44 | 48 | 40 | 91 | 133 | 89  | 81  | 88  | 84  | 54 |
| 58 | 60 | 54 | 58 | 75  | 62  | 79  | 57  | 93  | 62 |
| 41 | 67 | 45 | 99 | 127 | 99  | 100 | 103 | 99  | 58 |
| 39 | 33 | 30 | 50 | 71  | 53  | 46  | 34  | 43  | 36 |
| 12 | 8  | 10 | 26 | 32  | 36  | 17  | 13  | 12  | 5  |
| 38 | 33 | 39 | 79 | 115 | 84  | 99  | 59  | 75  | 62 |
| 25 | 24 | 42 | 56 | 72  | 69  | 65  | 66  | 51  | 40 |
| 19 | 20 | 18 | 90 | 97  | 76  | 72  | 68  | 74  | 42 |
| 35 | 30 | 44 | 28 | 49  | 42  | 40  | 25  | 41  | 38 |
| 37 | 30 | 45 | 55 | 62  | 60  | 43  | 46  | 46  | 43 |
| 24 | 26 | 34 | 30 | 38  | 36  | 20  | 25  | 33  | 22 |
| 39 | 26 | 38 | 25 | 33  | 21  | 42  | 25  | 39  | 32 |
| 36 | 27 | 35 | 44 | 46  | 43  | 43  | 45  | 54  | 35 |
| 45 | 60 | 53 | 52 | 72  | 50  | 72  | 46  | 62  | 55 |
| 32 | 36 | 31 | 67 | 80  | 91  | 52  | 48  | 50  | 38 |
| 29 | 38 | 25 | 28 | 27  | 36  | 27  | 30  | 33  | 32 |
| 29 | 30 | 40 | 60 | 68  | 53  | 48  | 51  | 63  | 30 |
| 7  | 7  | 10 | 8  | 12  | 12  | 12  | 4   | 5   | 7  |
| 53 | 44 | 55 | 71 | 84  | 81  | 71  | 61  | 67  | 49 |
| 36 | 48 | 39 | 50 | 73  | 67  | 55  | 37  | 45  | 37 |
| 35 | 23 | 42 | 34 | 40  | 36  | 21  | 36  | 45  | 33 |

|    |    |    |     |     |     |     |     |     |    |
|----|----|----|-----|-----|-----|-----|-----|-----|----|
| 19 | 21 | 19 | 32  | 35  | 36  | 31  | 34  | 35  | 28 |
| 38 | 47 | 60 | 40  | 42  | 43  | 33  | 43  | 49  | 36 |
| 22 | 42 | 28 | 39  | 51  | 38  | 36  | 30  | 27  | 31 |
| 38 | 31 | 31 | 22  | 22  | 23  | 40  | 29  | 30  | 38 |
| 29 | 42 | 42 | 49  | 49  | 48  | 62  | 38  | 49  | 38 |
| 17 | 27 | 28 | 29  | 30  | 21  | 19  | 21  | 29  | 13 |
| 16 | 18 | 20 | 17  | 32  | 27  | 37  | 25  | 30  | 19 |
| 66 | 36 | 59 | 86  | 130 | 96  | 99  | 88  | 109 | 57 |
| 41 | 37 | 29 | 34  | 41  | 32  | 38  | 33  | 27  | 42 |
| 33 | 31 | 32 | 61  | 82  | 48  | 50  | 45  | 45  | 27 |
| 39 | 29 | 54 | 42  | 57  | 68  | 43  | 38  | 41  | 24 |
| 18 | 8  | 16 | 23  | 26  | 24  | 15  | 17  | 16  | 12 |
| 21 | 37 | 38 | 27  | 45  | 35  | 36  | 28  | 36  | 29 |
| 65 | 78 | 67 | 45  | 84  | 77  | 79  | 47  | 61  | 37 |
| 27 | 20 | 31 | 142 | 182 | 151 | 160 | 140 | 143 | 60 |
| 34 | 37 | 23 | 94  | 108 | 102 | 82  | 47  | 72  | 30 |
| 37 | 57 | 59 | 84  | 96  | 94  | 99  | 98  | 107 | 64 |
| 35 | 36 | 42 | 63  | 74  | 72  | 72  | 52  | 71  | 46 |
| 53 | 55 | 46 | 26  | 38  | 35  | 29  | 42  | 25  | 25 |
| 42 | 47 | 58 | 89  | 126 | 116 | 97  | 77  | 70  | 41 |
| 23 | 25 | 24 | 34  | 42  | 36  | 35  | 36  | 35  | 34 |
| 10 | 14 | 4  | 28  | 31  | 20  | 38  | 20  | 33  | 12 |
| 33 | 30 | 27 | 80  | 74  | 56  | 54  | 46  | 56  | 39 |
| 24 | 24 | 31 | 26  | 37  | 44  | 36  | 38  | 45  | 39 |
| 30 | 25 | 38 | 68  | 55  | 67  | 26  | 28  | 34  | 23 |
| 28 | 36 | 46 | 15  | 13  | 16  | 16  | 16  | 26  | 29 |
| 54 | 56 | 64 | 53  | 62  | 63  | 62  | 58  | 75  | 43 |
| 43 | 37 | 23 | 165 | 200 | 172 | 145 | 148 | 129 | 66 |
| 67 | 57 | 82 | 82  | 109 | 80  | 74  | 75  | 79  | 55 |
| 66 | 69 | 76 | 65  | 85  | 76  | 84  | 62  | 79  | 71 |
| 22 | 24 | 30 | 34  | 22  | 28  | 24  | 31  | 23  | 32 |
| 66 | 71 | 77 | 77  | 79  | 75  | 100 | 62  | 82  | 63 |
| 41 | 31 | 61 | 107 | 141 | 100 | 86  | 88  | 69  | 71 |
| 31 | 21 | 22 | 27  | 32  | 29  | 21  | 9   | 27  | 18 |
| 55 | 38 | 54 | 28  | 43  | 41  | 39  | 39  | 38  | 36 |
| 10 | 11 | 8  | 14  | 14  | 12  | 5   | 10  | 21  | 6  |
| 47 | 42 | 34 | 53  | 74  | 53  | 54  | 42  | 37  | 36 |
| 8  | 5  | 14 | 20  | 27  | 3   | 5   | 9   | 5   | 5  |
| 41 | 32 | 45 | 37  | 49  | 53  | 45  | 25  | 43  | 47 |
| 40 | 56 | 53 | 41  | 60  | 67  | 51  | 49  | 37  | 40 |
| 47 | 54 | 55 | 45  | 53  | 48  | 52  | 47  | 44  | 46 |

|    |    |    |     |     |     |     |     |     |    |
|----|----|----|-----|-----|-----|-----|-----|-----|----|
| 46 | 44 | 48 | 71  | 95  | 90  | 59  | 55  | 59  | 40 |
| 56 | 45 | 45 | 58  | 62  | 47  | 42  | 34  | 50  | 35 |
| 17 | 35 | 29 | 92  | 109 | 90  | 71  | 76  | 99  | 39 |
| 35 | 37 | 30 | 19  | 18  | 24  | 15  | 16  | 11  | 19 |
| 20 | 14 | 20 | 20  | 46  | 25  | 16  | 20  | 18  | 30 |
| 36 | 39 | 36 | 68  | 61  | 67  | 65  | 49  | 59  | 32 |
| 65 | 65 | 65 | 81  | 115 | 104 | 100 | 109 | 111 | 65 |
| 8  | 12 | 19 | 10  | 9   | 5   | 9   | 2   | 9   | 11 |
| 23 | 21 | 14 | 30  | 38  | 18  | 25  | 23  | 32  | 12 |
| 47 | 36 | 56 | 39  | 58  | 49  | 37  | 37  | 42  | 26 |
| 28 | 23 | 22 | 11  | 10  | 14  | 9   | 9   | 16  | 17 |
| 38 | 29 | 28 | 23  | 31  | 24  | 24  | 27  | 25  | 29 |
| 13 | 15 | 23 | 12  | 11  | 9   | 6   | 11  | 6   | 23 |
| 12 | 20 | 17 | 13  | 14  | 10  | 11  | 12  | 17  | 16 |
| 32 | 34 | 37 | 21  | 37  | 33  | 33  | 19  | 27  | 27 |
| 39 | 40 | 33 | 78  | 82  | 74  | 75  | 54  | 69  | 41 |
| 46 | 26 | 42 | 47  | 39  | 41  | 31  | 30  | 50  | 39 |
| 47 | 31 | 52 | 103 | 113 | 89  | 58  | 52  | 53  | 43 |
| 27 | 23 | 34 | 24  | 26  | 24  | 20  | 26  | 23  | 24 |
| 43 | 45 | 45 | 86  | 125 | 96  | 76  | 56  | 78  | 46 |
| 15 | 24 | 29 | 20  | 12  | 19  | 16  | 15  | 13  | 16 |
| 24 | 24 | 18 | 28  | 41  | 39  | 41  | 30  | 28  | 17 |
| 34 | 27 | 25 | 69  | 82  | 69  | 68  | 57  | 73  | 40 |
| 47 | 47 | 58 | 51  | 67  | 64  | 46  | 53  | 58  | 43 |
| 22 | 22 | 16 | 17  | 27  | 29  | 20  | 25  | 18  | 17 |
| 40 | 42 | 40 | 54  | 78  | 56  | 44  | 35  | 42  | 41 |
| 52 | 58 | 65 | 97  | 121 | 79  | 101 | 86  | 98  | 63 |
| 71 | 53 | 75 | 91  | 93  | 93  | 69  | 77  | 74  | 51 |
| 8  | 14 | 15 | 11  | 5   | 2   | 14  | 7   | 10  | 12 |
| 38 | 25 | 32 | 55  | 76  | 62  | 45  | 64  | 67  | 42 |
| 21 | 37 | 35 | 36  | 24  | 28  | 27  | 21  | 29  | 17 |
| 22 | 30 | 23 | 33  | 32  | 39  | 30  | 15  | 29  | 21 |
| 29 | 24 | 29 | 30  | 21  | 27  | 34  | 28  | 34  | 36 |
| 33 | 28 | 47 | 42  | 53  | 34  | 55  | 39  | 41  | 44 |
| 16 | 8  | 20 | 13  | 15  | 13  | 15  | 15  | 13  | 15 |
| 10 | 12 | 19 | 20  | 33  | 41  | 39  | 25  | 38  | 23 |
| 11 | 18 | 8  | 20  | 19  | 13  | 17  | 25  | 21  | 14 |
| 51 | 42 | 46 | 142 | 228 | 203 | 144 | 116 | 109 | 59 |
| 61 | 74 | 75 | 68  | 89  | 76  | 54  | 62  | 63  | 37 |
| 66 | 64 | 78 | 62  | 81  | 75  | 81  | 64  | 92  | 57 |
| 24 | 33 | 40 | 23  | 37  | 32  | 21  | 14  | 14  | 28 |

|    |    |    |     |     |     |     |     |     |    |
|----|----|----|-----|-----|-----|-----|-----|-----|----|
| 41 | 36 | 34 | 35  | 42  | 49  | 35  | 28  | 35  | 29 |
| 29 | 25 | 26 | 31  | 40  | 21  | 16  | 19  | 20  | 28 |
| 78 | 61 | 73 | 105 | 134 | 118 | 135 | 126 | 157 | 70 |
| 41 | 46 | 44 | 56  | 75  | 54  | 43  | 51  | 57  | 42 |
| 33 | 53 | 53 | 73  | 56  | 53  | 54  | 45  | 49  | 37 |
| 18 | 7  | 26 | 16  | 28  | 26  | 23  | 8   | 15  | 19 |
| 43 | 40 | 44 | 39  | 24  | 21  | 34  | 20  | 40  | 18 |
| 35 | 66 | 55 | 57  | 67  | 66  | 90  | 69  | 60  | 45 |
| 50 | 50 | 51 | 82  | 132 | 108 | 105 | 102 | 106 | 58 |
| 16 | 22 | 12 | 23  | 19  | 20  | 19  | 17  | 21  | 15 |
| 34 | 39 | 43 | 37  | 40  | 36  | 33  | 29  | 34  | 30 |
| 19 | 17 | 26 | 11  | 19  | 20  | 27  | 18  | 23  | 18 |
| 16 | 26 | 20 | 23  | 24  | 22  | 23  | 25  | 13  | 11 |
| 42 | 42 | 46 | 59  | 75  | 67  | 84  | 67  | 80  | 54 |
| 23 | 28 | 23 | 22  | 24  | 35  | 33  | 17  | 23  | 21 |
| 22 | 21 | 25 | 55  | 60  | 56  | 67  | 60  | 67  | 39 |
| 69 | 52 | 85 | 85  | 103 | 89  | 79  | 59  | 61  | 52 |
| 42 | 46 | 34 | 128 | 144 | 116 | 123 | 125 | 132 | 57 |
| 39 | 31 | 44 | 24  | 31  | 32  | 33  | 29  | 30  | 31 |
| 43 | 40 | 40 | 80  | 93  | 88  | 121 | 90  | 84  | 37 |
| 36 | 47 | 42 | 59  | 64  | 63  | 61  | 44  | 65  | 38 |
| 27 | 48 | 40 | 48  | 61  | 63  | 75  | 60  | 77  | 38 |
| 55 | 61 | 66 | 116 | 134 | 114 | 98  | 85  | 103 | 64 |
| 41 | 46 | 48 | 58  | 78  | 71  | 54  | 54  | 49  | 36 |
| 39 | 42 | 46 | 52  | 71  | 71  | 40  | 41  | 56  | 49 |
| 53 | 39 | 46 | 26  | 34  | 20  | 30  | 32  | 31  | 39 |
| 34 | 33 | 27 | 46  | 53  | 45  | 57  | 33  | 43  | 35 |
| 23 | 23 | 32 | 32  | 51  | 35  | 24  | 29  | 28  | 25 |
| 57 | 43 | 61 | 45  | 61  | 57  | 46  | 50  | 45  | 53 |
| 48 | 45 | 39 | 105 | 140 | 128 | 116 | 90  | 102 | 57 |
| 16 | 30 | 29 | 45  | 42  | 42  | 30  | 25  | 29  | 26 |
| 22 | 23 | 29 | 23  | 20  | 17  | 32  | 18  | 28  | 20 |
| 41 | 42 | 64 | 75  | 89  | 89  | 102 | 83  | 97  | 63 |
| 26 | 19 | 17 | 71  | 102 | 70  | 64  | 46  | 71  | 22 |
| 52 | 51 | 60 | 63  | 64  | 64  | 62  | 62  | 51  | 47 |
| 18 | 33 | 27 | 19  | 28  | 17  | 17  | 27  | 21  | 15 |
| 17 | 13 | 19 | 7   | 19  | 15  | 16  | 12  | 16  | 14 |
| 22 | 25 | 27 | 37  | 38  | 48  | 27  | 34  | 29  | 27 |
| 27 | 24 | 26 | 23  | 21  | 28  | 25  | 24  | 24  | 21 |
| 24 | 32 | 13 | 52  | 49  | 48  | 29  | 30  | 39  | 26 |
| 52 | 74 | 57 | 80  | 132 | 94  | 94  | 76  | 79  | 76 |

|     |     |     |     |     |     |     |     |     |     |
|-----|-----|-----|-----|-----|-----|-----|-----|-----|-----|
| 31  | 48  | 41  | 79  | 100 | 85  | 85  | 81  | 93  | 55  |
| 41  | 49  | 57  | 51  | 49  | 55  | 38  | 50  | 55  | 52  |
| 13  | 13  | 20  | 58  | 79  | 58  | 66  | 59  | 59  | 29  |
| 53  | 49  | 52  | 69  | 96  | 75  | 75  | 60  | 70  | 70  |
| 50  | 55  | 49  | 21  | 25  | 23  | 22  | 31  | 23  | 46  |
| 23  | 34  | 26  | 23  | 29  | 27  | 33  | 19  | 22  | 21  |
| 40  | 41  | 51  | 26  | 16  | 21  | 28  | 29  | 28  | 27  |
| 55  | 51  | 52  | 27  | 13  | 20  | 24  | 30  | 26  | 30  |
| 28  | 28  | 29  | 82  | 92  | 104 | 98  | 82  | 92  | 48  |
| 30  | 34  | 38  | 23  | 43  | 30  | 36  | 24  | 30  | 28  |
| 40  | 36  | 39  | 33  | 44  | 28  | 40  | 61  | 66  | 35  |
| 53  | 50  | 53  | 176 | 209 | 204 | 112 | 105 | 91  | 81  |
| 30  | 28  | 27  | 22  | 38  | 37  | 31  | 43  | 45  | 29  |
| 61  | 55  | 68  | 30  | 23  | 13  | 20  | 22  | 23  | 22  |
| 55  | 45  | 67  | 95  | 138 | 99  | 88  | 77  | 91  | 47  |
| 31  | 21  | 30  | 45  | 63  | 61  | 53  | 63  | 65  | 40  |
| 33  | 37  | 42  | 63  | 84  | 96  | 60  | 51  | 72  | 48  |
| 30  | 23  | 28  | 53  | 60  | 71  | 55  | 43  | 49  | 30  |
| 22  | 25  | 16  | 21  | 25  | 15  | 20  | 18  | 17  | 15  |
| 48  | 62  | 74  | 51  | 77  | 52  | 61  | 73  | 61  | 54  |
| 56  | 57  | 62  | 54  | 58  | 71  | 43  | 33  | 45  | 38  |
| 57  | 83  | 76  | 281 | 406 | 335 | 342 | 313 | 344 | 141 |
| 25  | 24  | 23  | 22  | 35  | 26  | 27  | 16  | 24  | 26  |
| 32  | 26  | 34  | 87  | 119 | 100 | 108 | 91  | 92  | 61  |
| 64  | 59  | 54  | 155 | 175 | 167 | 144 | 134 | 142 | 73  |
| 32  | 21  | 29  | 22  | 27  | 24  | 31  | 24  | 26  | 37  |
| 33  | 31  | 38  | 31  | 28  | 35  | 33  | 21  | 20  | 30  |
| 55  | 68  | 49  | 57  | 71  | 63  | 69  | 58  | 74  | 50  |
| 41  | 30  | 36  | 170 | 197 | 186 | 173 | 144 | 167 | 54  |
| 39  | 28  | 42  | 84  | 90  | 89  | 53  | 59  | 44  | 40  |
| 35  | 46  | 50  | 89  | 142 | 125 | 148 | 154 | 146 | 91  |
| 46  | 51  | 57  | 119 | 164 | 127 | 111 | 87  | 87  | 68  |
| 31  | 40  | 44  | 46  | 51  | 47  | 35  | 41  | 46  | 31  |
| 46  | 58  | 59  | 66  | 76  | 62  | 69  | 54  | 58  | 52  |
| 28  | 41  | 37  | 33  | 27  | 38  | 24  | 24  | 30  | 32  |
| 187 | 163 | 191 | 223 | 296 | 218 | 260 | 220 | 222 | 88  |
| 25  | 22  | 17  | 15  | 36  | 20  | 20  | 20  | 22  | 24  |
| 38  | 45  | 44  | 51  | 49  | 38  | 52  | 36  | 39  | 41  |
| 28  | 40  | 30  | 23  | 24  | 20  | 24  | 16  | 26  | 20  |
| 10  | 8   | 17  | 10  | 10  | 10  | 4   | 8   | 8   | 7   |
| 13  | 15  | 29  | 26  | 18  | 13  | 9   | 20  | 12  | 11  |

|    |    |    |     |     |     |     |     |     |    |
|----|----|----|-----|-----|-----|-----|-----|-----|----|
| 42 | 38 | 27 | 46  | 57  | 50  | 56  | 51  | 61  | 38 |
| 32 | 30 | 32 | 22  | 26  | 21  | 30  | 15  | 14  | 17 |
| 70 | 66 | 49 | 67  | 103 | 90  | 53  | 42  | 49  | 42 |
| 34 | 30 | 30 | 43  | 41  | 36  | 45  | 37  | 36  | 27 |
| 73 | 58 | 65 | 93  | 94  | 79  | 55  | 64  | 72  | 43 |
| 6  | 11 | 10 | 7   | 5   | 10  | 10  | 4   | 5   | 11 |
| 25 | 8  | 22 | 41  | 40  | 38  | 27  | 31  | 28  | 25 |
| 61 | 73 | 73 | 73  | 106 | 80  | 95  | 78  | 94  | 68 |
| 31 | 18 | 24 | 22  | 24  | 28  | 17  | 25  | 23  | 23 |
| 35 | 41 | 37 | 43  | 69  | 64  | 48  | 47  | 57  | 52 |
| 38 | 30 | 29 | 33  | 47  | 43  | 19  | 22  | 39  | 36 |
| 37 | 39 | 41 | 27  | 19  | 19  | 27  | 25  | 31  | 35 |
| 62 | 67 | 61 | 39  | 47  | 41  | 38  | 39  | 45  | 49 |
| 36 | 31 | 31 | 53  | 56  | 57  | 29  | 36  | 42  | 34 |
| 53 | 57 | 50 | 55  | 74  | 57  | 65  | 57  | 57  | 48 |
| 41 | 40 | 44 | 82  | 99  | 96  | 123 | 104 | 93  | 50 |
| 53 | 55 | 61 | 50  | 55  | 45  | 28  | 46  | 34  | 28 |
| 12 | 15 | 6  | 26  | 33  | 30  | 27  | 27  | 33  | 17 |
| 66 | 65 | 46 | 58  | 87  | 68  | 74  | 70  | 82  | 46 |
| 39 | 42 | 43 | 85  | 107 | 87  | 88  | 97  | 83  | 56 |
| 50 | 45 | 45 | 55  | 63  | 61  | 66  | 56  | 61  | 45 |
| 24 | 17 | 26 | 85  | 109 | 66  | 51  | 62  | 50  | 44 |
| 46 | 45 | 45 | 180 | 231 | 181 | 206 | 181 | 232 | 88 |
| 17 | 22 | 14 | 25  | 28  | 25  | 15  | 18  | 17  | 23 |
| 36 | 31 | 40 | 54  | 70  | 74  | 58  | 52  | 56  | 34 |
| 24 | 11 | 23 | 20  | 16  | 19  | 22  | 23  | 19  | 18 |
| 40 | 24 | 20 | 57  | 81  | 59  | 58  | 29  | 46  | 25 |
| 25 | 41 | 26 | 65  | 65  | 67  | 52  | 48  | 49  | 34 |
| 29 | 19 | 29 | 90  | 123 | 96  | 83  | 81  | 81  | 51 |
| 53 | 47 | 78 | 53  | 60  | 44  | 42  | 30  | 43  | 32 |
| 9  | 5  | 3  | 4   | 0   | 4   | 4   | 2   | 6   | 6  |
| 29 | 31 | 16 | 52  | 69  | 65  | 53  | 56  | 47  | 27 |
| 17 | 10 | 17 | 14  | 21  | 15  | 15  | 22  | 17  | 23 |
| 70 | 59 | 64 | 43  | 76  | 58  | 41  | 36  | 49  | 40 |
| 17 | 28 | 20 | 10  | 11  | 10  | 18  | 12  | 17  | 16 |
| 27 | 26 | 21 | 16  | 21  | 15  | 18  | 15  | 20  | 17 |
| 25 | 23 | 15 | 39  | 42  | 49  | 39  | 31  | 40  | 18 |
| 23 | 19 | 32 | 16  | 14  | 15  | 16  | 17  | 15  | 17 |
| 15 | 21 | 12 | 36  | 47  | 33  | 33  | 22  | 32  | 9  |
| 27 | 32 | 35 | 9   | 17  | 16  | 22  | 19  | 9   | 14 |
| 34 | 34 | 53 | 47  | 56  | 39  | 49  | 43  | 46  | 37 |



|    |    |    |     |     |     |     |     |     |    |
|----|----|----|-----|-----|-----|-----|-----|-----|----|
| 61 | 65 | 57 | 70  | 75  | 76  | 72  | 38  | 65  | 52 |
| 33 | 33 | 28 | 52  | 62  | 55  | 37  | 44  | 26  | 30 |
| 37 | 29 | 41 | 48  | 61  | 60  | 47  | 49  | 50  | 30 |
| 20 | 22 | 17 | 9   | 19  | 15  | 12  | 9   | 13  | 19 |
| 25 | 19 | 29 | 43  | 48  | 38  | 38  | 25  | 28  | 24 |
| 22 | 41 | 37 | 27  | 32  | 37  | 32  | 20  | 30  | 21 |
| 25 | 22 | 37 | 38  | 52  | 59  | 46  | 46  | 48  | 31 |
| 50 | 39 | 54 | 93  | 110 | 99  | 105 | 113 | 109 | 75 |
| 24 | 20 | 28 | 25  | 42  | 18  | 19  | 23  | 23  | 18 |
| 57 | 40 | 34 | 87  | 105 | 100 | 79  | 52  | 68  | 43 |
| 47 | 32 | 32 | 57  | 66  | 57  | 54  | 48  | 51  | 41 |
| 70 | 62 | 55 | 39  | 43  | 47  | 45  | 42  | 42  | 21 |
| 34 | 28 | 37 | 170 | 258 | 216 | 200 | 176 | 182 | 95 |
| 16 | 10 | 15 | 28  | 15  | 24  | 21  | 19  | 15  | 21 |
| 25 | 26 | 34 | 28  | 40  | 48  | 46  | 32  | 29  | 19 |
| 24 | 35 | 46 | 18  | 35  | 24  | 35  | 26  | 29  | 25 |
| 24 | 32 | 38 | 60  | 65  | 58  | 55  | 42  | 63  | 31 |
| 64 | 59 | 59 | 91  | 120 | 106 | 140 | 111 | 122 | 57 |
| 6  | 11 | 8  | 10  | 12  | 9   | 5   | 4   | 3   | 7  |
| 47 | 51 | 67 | 119 | 153 | 125 | 132 | 100 | 124 | 70 |
| 51 | 42 | 48 | 119 | 141 | 132 | 124 | 90  | 98  | 64 |
| 20 | 21 | 35 | 36  | 29  | 36  | 45  | 35  | 35  | 21 |
| 24 | 27 | 29 | 97  | 107 | 108 | 63  | 60  | 52  | 34 |
| 14 | 16 | 20 | 6   | 14  | 6   | 13  | 8   | 10  | 11 |
| 27 | 28 | 23 | 31  | 54  | 46  | 42  | 28  | 41  | 21 |
| 8  | 10 | 14 | 10  | 8   | 5   | 13  | 7   | 4   | 14 |
| 39 | 35 | 31 | 72  | 78  | 69  | 91  | 61  | 70  | 43 |
| 35 | 44 | 44 | 94  | 93  | 84  | 67  | 63  | 70  | 35 |
| 49 | 55 | 43 | 30  | 29  | 27  | 43  | 35  | 41  | 30 |
| 32 | 37 | 35 | 65  | 67  | 57  | 60  | 56  | 55  | 24 |
| 16 | 13 | 17 | 23  | 19  | 17  | 21  | 12  | 22  | 11 |
| 22 | 30 | 45 | 22  | 18  | 22  | 22  | 30  | 22  | 29 |
| 30 | 26 | 30 | 24  | 40  | 55  | 44  | 52  | 63  | 26 |
| 14 | 22 | 20 | 12  | 24  | 25  | 21  | 13  | 22  | 26 |
| 25 | 20 | 23 | 19  | 39  | 34  | 39  | 34  | 45  | 20 |
| 25 | 33 | 29 | 45  | 50  | 33  | 55  | 44  | 42  | 25 |
| 39 | 37 | 53 | 67  | 88  | 57  | 87  | 68  | 73  | 43 |
| 37 | 28 | 25 | 119 | 195 | 160 | 224 | 153 | 166 | 97 |
| 56 | 38 | 67 | 84  | 111 | 101 | 68  | 52  | 62  | 62 |
| 23 | 23 | 22 | 30  | 57  | 33  | 40  | 35  | 38  | 26 |
| 26 | 14 | 10 | 14  | 15  | 20  | 22  | 16  | 16  | 18 |

|    |    |    |     |     |     |     |     |     |     |
|----|----|----|-----|-----|-----|-----|-----|-----|-----|
| 78 | 62 | 78 | 81  | 125 | 101 | 112 | 90  | 139 | 76  |
| 35 | 28 | 20 | 39  | 47  | 29  | 26  | 13  | 27  | 22  |
| 30 | 47 | 36 | 32  | 63  | 42  | 40  | 32  | 37  | 27  |
| 26 | 35 | 33 | 34  | 40  | 42  | 36  | 23  | 29  | 26  |
| 43 | 45 | 52 | 77  | 118 | 106 | 99  | 85  | 94  | 67  |
| 57 | 53 | 64 | 83  | 110 | 104 | 84  | 75  | 69  | 75  |
| 33 | 33 | 34 | 43  | 59  | 44  | 39  | 32  | 37  | 21  |
| 50 | 55 | 49 | 70  | 75  | 77  | 69  | 58  | 71  | 46  |
| 36 | 36 | 24 | 34  | 47  | 38  | 45  | 23  | 28  | 31  |
| 44 | 34 | 37 | 79  | 101 | 109 | 82  | 74  | 82  | 53  |
| 61 | 53 | 49 | 27  | 34  | 29  | 23  | 26  | 28  | 44  |
| 84 | 75 | 80 | 72  | 96  | 98  | 92  | 88  | 81  | 75  |
| 76 | 71 | 76 | 61  | 96  | 69  | 76  | 71  | 75  | 55  |
| 16 | 28 | 30 | 23  | 35  | 36  | 11  | 23  | 16  | 19  |
| 35 | 33 | 28 | 58  | 79  | 57  | 58  | 42  | 57  | 28  |
| 51 | 43 | 57 | 218 | 284 | 237 | 248 | 200 | 234 | 101 |
| 12 | 16 | 19 | 22  | 36  | 35  | 41  | 41  | 47  | 22  |
| 20 | 17 | 15 | 23  | 20  | 22  | 24  | 32  | 20  | 14  |
| 46 | 45 | 35 | 120 | 154 | 158 | 101 | 84  | 93  | 44  |
| 19 | 23 | 19 | 36  | 28  | 27  | 15  | 17  | 19  | 11  |
| 23 | 27 | 30 | 13  | 18  | 22  | 20  | 17  | 20  | 16  |
| 43 | 39 | 53 | 188 | 237 | 212 | 185 | 142 | 182 | 78  |
| 20 | 20 | 26 | 41  | 37  | 38  | 29  | 24  | 34  | 29  |
| 31 | 28 | 33 | 45  | 37  | 38  | 21  | 30  | 38  | 15  |
| 14 | 16 | 20 | 7   | 16  | 16  | 4   | 13  | 13  | 16  |
| 52 | 67 | 72 | 139 | 166 | 128 | 92  | 98  | 124 | 54  |
| 45 | 62 | 53 | 66  | 61  | 51  | 55  | 62  | 49  | 56  |
| 44 | 46 | 38 | 61  | 63  | 62  | 64  | 66  | 65  | 46  |
| 33 | 34 | 29 | 20  | 36  | 32  | 23  | 26  | 27  | 23  |
| 24 | 20 | 24 | 99  | 95  | 75  | 78  | 54  | 69  | 41  |
| 40 | 48 | 41 | 66  | 97  | 71  | 69  | 64  | 65  | 48  |
| 35 | 36 | 43 | 39  | 38  | 43  | 40  | 40  | 40  | 30  |
| 41 | 42 | 43 | 44  | 85  | 49  | 39  | 44  | 48  | 42  |
| 29 | 35 | 29 | 38  | 26  | 22  | 29  | 24  | 39  | 21  |
| 40 | 32 | 42 | 29  | 36  | 27  | 28  | 26  | 21  | 22  |
| 48 | 52 | 54 | 115 | 148 | 123 | 120 | 118 | 97  | 60  |
| 30 | 24 | 23 | 23  | 28  | 36  | 29  | 19  | 28  | 8   |
| 32 | 29 | 30 | 26  | 36  | 38  | 33  | 40  | 39  | 18  |
| 23 | 22 | 29 | 27  | 39  | 33  | 25  | 31  | 33  | 27  |
| 41 | 34 | 44 | 47  | 60  | 57  | 52  | 45  | 66  | 36  |
| 24 | 25 | 14 | 18  | 27  | 24  | 24  | 19  | 27  | 19  |

|     |     |     |     |     |     |     |     |     |     |
|-----|-----|-----|-----|-----|-----|-----|-----|-----|-----|
| 54  | 42  | 48  | 26  | 69  | 38  | 44  | 42  | 42  | 32  |
| 27  | 22  | 39  | 34  | 33  | 46  | 35  | 36  | 37  | 24  |
| 15  | 24  | 24  | 20  | 33  | 24  | 22  | 23  | 24  | 21  |
| 33  | 33  | 39  | 37  | 47  | 55  | 31  | 45  | 45  | 47  |
| 46  | 43  | 57  | 81  | 112 | 121 | 95  | 78  | 95  | 61  |
| 41  | 48  | 50  | 108 | 125 | 124 | 112 | 119 | 117 | 55  |
| 39  | 35  | 55  | 28  | 37  | 39  | 41  | 35  | 28  | 44  |
| 66  | 73  | 72  | 75  | 79  | 75  | 75  | 52  | 69  | 59  |
| 45  | 57  | 43  | 75  | 93  | 80  | 120 | 105 | 95  | 50  |
| 52  | 54  | 51  | 102 | 134 | 123 | 123 | 114 | 117 | 62  |
| 31  | 42  | 39  | 73  | 95  | 80  | 69  | 43  | 66  | 34  |
| 54  | 65  | 68  | 75  | 86  | 94  | 115 | 98  | 110 | 58  |
| 23  | 26  | 29  | 38  | 54  | 51  | 47  | 41  | 65  | 42  |
| 32  | 51  | 32  | 63  | 69  | 76  | 66  | 68  | 75  | 45  |
| 77  | 68  | 71  | 62  | 76  | 57  | 62  | 55  | 64  | 41  |
| 39  | 34  | 35  | 58  | 54  | 57  | 40  | 48  | 34  | 23  |
| 38  | 49  | 44  | 17  | 47  | 39  | 34  | 32  | 42  | 31  |
| 21  | 27  | 37  | 108 | 132 | 96  | 75  | 40  | 74  | 41  |
| 47  | 34  | 45  | 46  | 72  | 61  | 44  | 47  | 42  | 46  |
| 148 | 130 | 136 | 444 | 591 | 480 | 374 | 324 | 358 | 163 |
| 25  | 23  | 24  | 34  | 35  | 29  | 44  | 34  | 28  | 30  |
| 30  | 33  | 37  | 79  | 96  | 69  | 50  | 36  | 32  | 32  |
| 44  | 41  | 40  | 149 | 186 | 165 | 165 | 140 | 175 | 81  |
| 53  | 56  | 78  | 134 | 185 | 175 | 208 | 204 | 257 | 110 |
| 36  | 41  | 47  | 92  | 104 | 117 | 108 | 116 | 95  | 51  |
| 37  | 52  | 57  | 86  | 94  | 74  | 80  | 66  | 75  | 51  |
| 39  | 34  | 44  | 60  | 60  | 51  | 43  | 37  | 51  | 43  |
| 29  | 36  | 45  | 127 | 175 | 134 | 97  | 89  | 79  | 58  |
| 30  | 36  | 36  | 43  | 51  | 44  | 58  | 31  | 45  | 47  |
| 33  | 54  | 48  | 50  | 67  | 59  | 40  | 45  | 39  | 34  |
| 19  | 32  | 38  | 30  | 33  | 45  | 55  | 36  | 40  | 31  |
| 56  | 53  | 50  | 176 | 241 | 201 | 213 | 144 | 167 | 99  |
| 21  | 25  | 31  | 41  | 48  | 42  | 38  | 39  | 43  | 30  |
| 42  | 31  | 42  | 33  | 33  | 39  | 38  | 30  | 30  | 35  |
| 24  | 24  | 34  | 41  | 42  | 45  | 18  | 34  | 33  | 24  |
| 43  | 42  | 54  | 45  | 63  | 56  | 51  | 42  | 38  | 31  |
| 86  | 93  | 80  | 54  | 60  | 61  | 72  | 77  | 74  | 60  |
| 19  | 26  | 20  | 30  | 22  | 19  | 18  | 15  | 10  | 14  |
| 47  | 42  | 56  | 224 | 259 | 211 | 189 | 188 | 205 | 86  |
| 51  | 60  | 59  | 74  | 80  | 63  | 79  | 65  | 91  | 64  |
| 28  | 33  | 30  | 32  | 32  | 30  | 34  | 29  | 23  | 31  |

|    |    |    |     |     |     |     |     |     |    |
|----|----|----|-----|-----|-----|-----|-----|-----|----|
| 72 | 57 | 62 | 93  | 139 | 145 | 112 | 124 | 115 | 98 |
| 42 | 34 | 42 | 61  | 64  | 64  | 64  | 78  | 72  | 46 |
| 25 | 31 | 46 | 27  | 37  | 21  | 39  | 25  | 18  | 27 |
| 33 | 28 | 31 | 138 | 168 | 147 | 125 | 139 | 137 | 62 |
| 9  | 9  | 21 | 14  | 20  | 19  | 14  | 16  | 12  | 12 |
| 33 | 34 | 33 | 39  | 71  | 69  | 43  | 37  | 61  | 35 |
| 54 | 72 | 58 | 140 | 161 | 134 | 87  | 80  | 77  | 42 |
| 25 | 19 | 25 | 43  | 56  | 44  | 50  | 36  | 40  | 24 |
| 32 | 29 | 26 | 57  | 72  | 69  | 79  | 48  | 58  | 40 |
| 17 | 20 | 21 | 76  | 107 | 66  | 53  | 28  | 38  | 16 |
| 81 | 84 | 87 | 103 | 148 | 108 | 107 | 84  | 118 | 73 |
| 49 | 52 | 52 | 89  | 115 | 89  | 85  | 75  | 97  | 54 |
| 16 | 10 | 16 | 13  | 34  | 27  | 26  | 15  | 19  | 11 |
| 21 | 21 | 20 | 18  | 35  | 22  | 17  | 18  | 15  | 15 |
| 19 | 16 | 22 | 8   | 16  | 14  | 16  | 15  | 19  | 13 |
| 32 | 34 | 51 | 154 | 184 | 171 | 182 | 183 | 187 | 85 |
| 22 | 39 | 26 | 37  | 49  | 35  | 38  | 47  | 55  | 29 |
| 51 | 46 | 53 | 95  | 131 | 107 | 85  | 85  | 82  | 54 |
| 26 | 40 | 40 | 39  | 46  | 50  | 45  | 38  | 48  | 30 |
| 57 | 57 | 42 | 46  | 63  | 55  | 79  | 60  | 66  | 38 |
| 29 | 28 | 37 | 26  | 28  | 28  | 18  | 24  | 23  | 25 |
| 49 | 57 | 58 | 107 | 100 | 92  | 101 | 103 | 88  | 62 |
| 30 | 33 | 30 | 103 | 155 | 114 | 123 | 123 | 132 | 52 |
| 62 | 74 | 72 | 92  | 128 | 110 | 88  | 92  | 66  | 57 |
| 28 | 17 | 25 | 38  | 49  | 40  | 39  | 31  | 49  | 29 |
| 28 | 29 | 38 | 32  | 40  | 25  | 32  | 30  | 26  | 23 |
| 22 | 14 | 18 | 30  | 24  | 40  | 26  | 23  | 14  | 10 |
| 12 | 24 | 20 | 40  | 49  | 46  | 31  | 34  | 43  | 28 |
| 21 | 27 | 26 | 63  | 61  | 63  | 58  | 49  | 59  | 41 |
| 43 | 36 | 40 | 104 | 101 | 96  | 109 | 88  | 109 | 45 |
| 29 | 35 | 36 | 32  | 40  | 28  | 40  | 48  | 42  | 42 |
| 38 | 39 | 35 | 38  | 33  | 32  | 45  | 44  | 43  | 40 |
| 46 | 33 | 39 | 50  | 68  | 62  | 59  | 33  | 67  | 44 |
| 9  | 13 | 6  | 19  | 31  | 28  | 14  | 11  | 8   | 16 |
| 21 | 35 | 24 | 44  | 40  | 37  | 47  | 53  | 37  | 18 |
| 19 | 28 | 37 | 31  | 42  | 34  | 37  | 28  | 30  | 25 |
| 49 | 55 | 54 | 190 | 261 | 214 | 123 | 119 | 126 | 73 |
| 18 | 25 | 34 | 46  | 47  | 70  | 28  | 23  | 35  | 21 |
| 26 | 24 | 23 | 39  | 35  | 44  | 35  | 40  | 36  | 27 |
| 45 | 31 | 34 | 86  | 82  | 82  | 59  | 58  | 58  | 38 |
| 15 | 17 | 15 | 27  | 33  | 22  | 34  | 29  | 32  | 19 |

|    |    |    |     |     |     |     |     |     |     |
|----|----|----|-----|-----|-----|-----|-----|-----|-----|
| 49 | 61 | 61 | 116 | 154 | 126 | 106 | 98  | 88  | 56  |
| 17 | 17 | 13 | 12  | 22  | 11  | 16  | 14  | 24  | 9   |
| 31 | 25 | 40 | 19  | 31  | 27  | 18  | 21  | 22  | 18  |
| 40 | 46 | 41 | 58  | 61  | 54  | 54  | 51  | 78  | 40  |
| 34 | 40 | 57 | 60  | 71  | 64  | 42  | 38  | 56  | 37  |
| 51 | 56 | 51 | 200 | 255 | 248 | 214 | 165 | 195 | 108 |
| 44 | 21 | 42 | 43  | 53  | 51  | 51  | 50  | 57  | 31  |
| 24 | 36 | 36 | 43  | 68  | 66  | 63  | 54  | 57  | 43  |
| 44 | 43 | 47 | 57  | 68  | 49  | 50  | 47  | 42  | 35  |
| 18 | 24 | 31 | 52  | 49  | 47  | 41  | 30  | 34  | 30  |
| 47 | 36 | 51 | 79  | 99  | 94  | 80  | 68  | 77  | 45  |
| 44 | 40 | 54 | 102 | 145 | 108 | 83  | 74  | 81  | 33  |
| 37 | 24 | 39 | 52  | 73  | 50  | 50  | 42  | 54  | 42  |
| 22 | 17 | 34 | 15  | 19  | 22  | 27  | 18  | 21  | 16  |
| 26 | 20 | 43 | 32  | 44  | 34  | 44  | 43  | 29  | 23  |
| 62 | 59 | 80 | 119 | 166 | 115 | 131 | 103 | 106 | 72  |
| 40 | 44 | 44 | 85  | 117 | 69  | 79  | 83  | 90  | 49  |
| 42 | 55 | 55 | 183 | 221 | 191 | 262 | 230 | 255 | 131 |
| 32 | 50 | 48 | 87  | 77  | 89  | 64  | 58  | 62  | 45  |
| 23 | 27 | 27 | 49  | 69  | 45  | 38  | 36  | 37  | 39  |
| 16 | 20 | 21 | 49  | 48  | 42  | 35  | 42  | 34  | 22  |
| 68 | 65 | 81 | 70  | 74  | 76  | 65  | 89  | 72  | 54  |
| 24 | 23 | 35 | 27  | 31  | 11  | 33  | 27  | 22  | 22  |
| 25 | 13 | 19 | 46  | 53  | 61  | 39  | 38  | 60  | 34  |
| 36 | 35 | 35 | 72  | 89  | 96  | 79  | 79  | 80  | 48  |
| 31 | 22 | 33 | 27  | 44  | 39  | 39  | 37  | 53  | 28  |
| 37 | 28 | 33 | 32  | 51  | 30  | 43  | 41  | 55  | 33  |
| 52 | 56 | 55 | 49  | 34  | 39  | 39  | 35  | 43  | 47  |
| 60 | 62 | 78 | 72  | 78  | 92  | 69  | 65  | 90  | 48  |
| 70 | 56 | 71 | 168 | 230 | 186 | 128 | 108 | 120 | 43  |
| 33 | 33 | 36 | 49  | 69  | 57  | 89  | 66  | 80  | 43  |
| 38 | 54 | 38 | 39  | 53  | 48  | 52  | 32  | 46  | 40  |
| 15 | 16 | 25 | 30  | 35  | 23  | 26  | 16  | 17  | 19  |
| 37 | 37 | 42 | 23  | 30  | 23  | 31  | 26  | 37  | 32  |
| 26 | 21 | 33 | 18  | 16  | 14  | 7   | 21  | 15  | 19  |
| 39 | 56 | 74 | 66  | 87  | 71  | 91  | 62  | 64  | 45  |
| 14 | 12 | 11 | 15  | 11  | 7   | 15  | 5   | 5   | 6   |
| 49 | 52 | 62 | 32  | 40  | 28  | 31  | 37  | 32  | 35  |
| 14 | 7  | 22 | 23  | 29  | 33  | 26  | 28  | 20  | 17  |
| 30 | 38 | 38 | 22  | 39  | 30  | 34  | 32  | 30  | 31  |
| 46 | 52 | 60 | 93  | 120 | 111 | 94  | 88  | 75  | 57  |

|    |    |    |     |     |     |     |     |     |     |
|----|----|----|-----|-----|-----|-----|-----|-----|-----|
| 34 | 40 | 31 | 24  | 28  | 25  | 38  | 41  | 29  | 25  |
| 25 | 34 | 39 | 29  | 36  | 23  | 29  | 22  | 26  | 20  |
| 32 | 30 | 35 | 41  | 54  | 41  | 40  | 26  | 41  | 27  |
| 78 | 84 | 84 | 74  | 76  | 93  | 88  | 68  | 72  | 45  |
| 46 | 35 | 39 | 73  | 99  | 71  | 76  | 54  | 75  | 65  |
| 11 | 21 | 21 | 30  | 29  | 24  | 26  | 16  | 23  | 23  |
| 74 | 69 | 82 | 61  | 73  | 69  | 99  | 81  | 92  | 87  |
| 54 | 48 | 69 | 139 | 169 | 137 | 157 | 134 | 151 | 76  |
| 37 | 42 | 41 | 53  | 66  | 66  | 54  | 47  | 47  | 33  |
| 91 | 93 | 89 | 217 | 311 | 274 | 263 | 220 | 257 | 156 |
| 34 | 27 | 24 | 25  | 19  | 14  | 14  | 19  | 23  | 17  |
| 36 | 22 | 25 | 57  | 69  | 58  | 41  | 38  | 37  | 26  |
| 63 | 50 | 58 | 221 | 278 | 226 | 289 | 264 | 265 | 109 |
| 45 | 41 | 38 | 50  | 85  | 76  | 53  | 54  | 68  | 36  |
| 44 | 38 | 39 | 32  | 46  | 35  | 40  | 25  | 30  | 32  |
| 44 | 45 | 42 | 46  | 50  | 56  | 64  | 63  | 58  | 42  |
| 11 | 6  | 16 | 15  | 17  | 13  | 9   | 9   | 12  | 14  |
| 43 | 29 | 53 | 66  | 77  | 60  | 58  | 42  | 62  | 35  |
| 29 | 27 | 36 | 46  | 52  | 45  | 26  | 23  | 38  | 33  |
| 30 | 33 | 29 | 56  | 48  | 56  | 42  | 43  | 36  | 28  |
| 52 | 70 | 64 | 157 | 212 | 189 | 178 | 140 | 167 | 89  |
| 29 | 17 | 29 | 46  | 51  | 42  | 67  | 52  | 55  | 37  |
| 24 | 27 | 24 | 55  | 70  | 42  | 63  | 48  | 47  | 28  |
| 41 | 44 | 52 | 151 | 205 | 148 | 160 | 135 | 172 | 88  |
| 17 | 19 | 18 | 47  | 52  | 40  | 47  | 49  | 42  | 26  |
| 40 | 38 | 59 | 67  | 101 | 89  | 68  | 65  | 79  | 48  |
| 41 | 51 | 55 | 36  | 40  | 43  | 40  | 35  | 37  | 41  |
| 36 | 45 | 39 | 33  | 39  | 25  | 37  | 30  | 41  | 36  |
| 29 | 23 | 42 | 36  | 79  | 68  | 67  | 57  | 78  | 41  |
| 71 | 66 | 75 | 130 | 188 | 156 | 133 | 124 | 164 | 72  |
| 48 | 41 | 32 | 94  | 104 | 82  | 99  | 95  | 79  | 48  |
| 31 | 27 | 37 | 160 | 228 | 181 | 138 | 134 | 169 | 85  |
| 49 | 48 | 64 | 136 | 162 | 155 | 154 | 136 | 144 | 85  |
| 55 | 36 | 53 | 96  | 135 | 150 | 117 | 121 | 130 | 58  |
| 43 | 52 | 41 | 51  | 66  | 49  | 60  | 50  | 50  | 36  |
| 20 | 25 | 30 | 28  | 44  | 43  | 29  | 28  | 29  | 17  |
| 36 | 33 | 26 | 45  | 68  | 60  | 64  | 61  | 72  | 38  |
| 37 | 38 | 36 | 81  | 96  | 93  | 108 | 78  | 108 | 50  |
| 13 | 13 | 16 | 5   | 10  | 6   | 7   | 3   | 4   | 7   |
| 24 | 24 | 37 | 32  | 46  | 31  | 36  | 21  | 33  | 33  |
| 35 | 33 | 43 | 72  | 83  | 72  | 69  | 71  | 60  | 63  |

|    |    |    |     |     |     |     |     |     |    |
|----|----|----|-----|-----|-----|-----|-----|-----|----|
| 12 | 12 | 19 | 17  | 19  | 15  | 18  | 14  | 19  | 8  |
| 54 | 53 | 54 | 39  | 58  | 37  | 41  | 34  | 32  | 22 |
| 52 | 43 | 61 | 119 | 150 | 123 | 167 | 148 | 159 | 83 |
| 49 | 42 | 31 | 50  | 61  | 58  | 46  | 36  | 53  | 34 |
| 36 | 46 | 47 | 240 | 275 | 221 | 148 | 135 | 140 | 67 |
| 48 | 43 | 54 | 46  | 66  | 38  | 57  | 51  | 58  | 50 |
| 17 | 9  | 7  | 26  | 28  | 20  | 17  | 14  | 20  | 18 |
| 42 | 30 | 44 | 65  | 96  | 65  | 61  | 41  | 57  | 49 |
| 15 | 8  | 17 | 17  | 19  | 19  | 10  | 9   | 8   | 13 |
| 52 | 55 | 53 | 83  | 84  | 90  | 75  | 64  | 72  | 46 |
| 27 | 26 | 20 | 18  | 23  | 24  | 19  | 14  | 21  | 24 |
| 42 | 60 | 57 | 76  | 92  | 101 | 62  | 62  | 78  | 61 |
| 28 | 23 | 36 | 24  | 15  | 20  | 23  | 18  | 19  | 28 |
| 58 | 51 | 41 | 58  | 61  | 65  | 54  | 60  | 49  | 39 |
| 55 | 54 | 42 | 108 | 128 | 95  | 92  | 83  | 93  | 56 |
| 40 | 32 | 46 | 41  | 49  | 60  | 48  | 58  | 47  | 55 |
| 43 | 38 | 29 | 35  | 25  | 46  | 25  | 35  | 42  | 37 |
| 14 | 16 | 13 | 30  | 41  | 37  | 30  | 31  | 39  | 23 |
| 25 | 32 | 22 | 39  | 52  | 37  | 34  | 39  | 39  | 30 |
| 30 | 27 | 33 | 38  | 41  | 33  | 44  | 28  | 35  | 30 |
| 18 | 17 | 20 | 11  | 14  | 12  | 14  | 6   | 10  | 20 |
| 41 | 46 | 42 | 103 | 142 | 101 | 95  | 80  | 105 | 64 |
| 45 | 67 | 47 | 109 | 162 | 115 | 118 | 99  | 124 | 57 |
| 22 | 21 | 15 | 25  | 28  | 28  | 30  | 18  | 28  | 15 |
| 66 | 62 | 75 | 83  | 104 | 65  | 69  | 77  | 70  | 46 |
| 43 | 51 | 49 | 54  | 66  | 75  | 54  | 57  | 65  | 44 |
| 37 | 31 | 39 | 51  | 65  | 51  | 27  | 35  | 48  | 33 |
| 38 | 45 | 58 | 41  | 32  | 34  | 35  | 34  | 28  | 26 |
| 28 | 47 | 43 | 56  | 59  | 59  | 45  | 67  | 57  | 39 |
| 32 | 43 | 37 | 47  | 86  | 63  | 55  | 45  | 50  | 30 |
| 47 | 34 | 43 | 36  | 38  | 34  | 28  | 39  | 39  | 26 |
| 14 | 10 | 23 | 8   | 14  | 12  | 20  | 12  | 9   | 9  |
| 11 | 14 | 8  | 8   | 12  | 12  | 12  | 14  | 7   | 14 |
| 41 | 50 | 53 | 88  | 134 | 109 | 130 | 89  | 106 | 54 |
| 14 | 33 | 33 | 22  | 28  | 23  | 16  | 17  | 20  | 23 |
| 29 | 24 | 27 | 49  | 49  | 49  | 44  | 37  | 38  | 35 |
| 38 | 35 | 28 | 58  | 103 | 82  | 65  | 76  | 68  | 48 |
| 30 | 28 | 34 | 114 | 125 | 109 | 77  | 72  | 98  | 52 |
| 24 | 30 | 29 | 73  | 104 | 90  | 88  | 67  | 81  | 39 |
| 62 | 54 | 62 | 161 | 198 | 176 | 145 | 139 | 158 | 84 |
| 23 | 20 | 19 | 18  | 33  | 21  | 20  | 16  | 21  | 22 |

|    |    |    |     |     |     |     |     |     |     |
|----|----|----|-----|-----|-----|-----|-----|-----|-----|
| 33 | 31 | 33 | 45  | 38  | 62  | 50  | 51  | 51  | 31  |
| 42 | 38 | 46 | 66  | 86  | 68  | 59  | 79  | 55  | 46  |
| 15 | 12 | 22 | 25  | 17  | 26  | 30  | 31  | 21  | 18  |
| 23 | 21 | 36 | 47  | 58  | 40  | 36  | 31  | 20  | 32  |
| 29 | 35 | 37 | 62  | 51  | 61  | 47  | 55  | 35  | 25  |
| 27 | 32 | 35 | 40  | 32  | 38  | 22  | 20  | 35  | 27  |
| 25 | 31 | 34 | 53  | 62  | 63  | 55  | 54  | 49  | 30  |
| 25 | 22 | 18 | 103 | 142 | 132 | 64  | 41  | 78  | 20  |
| 14 | 8  | 20 | 20  | 23  | 25  | 22  | 16  | 13  | 15  |
| 59 | 91 | 84 | 95  | 86  | 84  | 99  | 76  | 92  | 75  |
| 19 | 8  | 19 | 20  | 22  | 16  | 19  | 15  | 16  | 15  |
| 8  | 13 | 17 | 19  | 20  | 19  | 18  | 15  | 18  | 10  |
| 34 | 37 | 48 | 61  | 77  | 65  | 45  | 67  | 51  | 39  |
| 48 | 44 | 39 | 42  | 60  | 57  | 41  | 42  | 41  | 38  |
| 38 | 39 | 50 | 66  | 51  | 49  | 56  | 36  | 51  | 34  |
| 16 | 22 | 16 | 22  | 21  | 15  | 18  | 12  | 21  | 12  |
| 20 | 34 | 36 | 77  | 86  | 74  | 71  | 77  | 84  | 49  |
| 54 | 60 | 54 | 34  | 48  | 38  | 44  | 25  | 37  | 31  |
| 21 | 35 | 52 | 31  | 33  | 51  | 28  | 29  | 38  | 20  |
| 35 | 39 | 47 | 31  | 40  | 55  | 39  | 35  | 33  | 33  |
| 18 | 19 | 17 | 25  | 21  | 21  | 12  | 6   | 8   | 14  |
| 30 | 27 | 23 | 12  | 25  | 18  | 19  | 16  | 22  | 12  |
| 43 | 39 | 47 | 39  | 59  | 43  | 39  | 51  | 41  | 29  |
| 43 | 42 | 31 | 145 | 189 | 142 | 98  | 88  | 109 | 67  |
| 19 | 17 | 21 | 21  | 24  | 18  | 24  | 16  | 13  | 18  |
| 27 | 30 | 26 | 67  | 54  | 48  | 36  | 27  | 51  | 25  |
| 49 | 37 | 61 | 41  | 70  | 72  | 67  | 60  | 74  | 60  |
| 17 | 16 | 16 | 6   | 14  | 11  | 18  | 6   | 10  | 10  |
| 51 | 42 | 46 | 42  | 57  | 53  | 48  | 33  | 39  | 33  |
| 48 | 58 | 47 | 163 | 160 | 151 | 126 | 106 | 91  | 60  |
| 22 | 28 | 24 | 34  | 44  | 36  | 18  | 19  | 23  | 21  |
| 17 | 18 | 19 | 15  | 16  | 16  | 18  | 8   | 9   | 11  |
| 51 | 48 | 56 | 82  | 90  | 98  | 66  | 55  | 62  | 55  |
| 24 | 21 | 28 | 70  | 91  | 98  | 91  | 82  | 97  | 46  |
| 31 | 25 | 30 | 33  | 39  | 40  | 37  | 33  | 41  | 36  |
| 39 | 36 | 42 | 48  | 62  | 58  | 57  | 55  | 73  | 32  |
| 24 | 18 | 29 | 23  | 26  | 27  | 17  | 25  | 29  | 27  |
| 56 | 53 | 68 | 180 | 248 | 216 | 196 | 164 | 217 | 106 |
| 24 | 18 | 25 | 11  | 8   | 8   | 8   | 12  | 18  | 20  |
| 29 | 19 | 30 | 39  | 55  | 40  | 41  | 31  | 35  | 31  |
| 48 | 49 | 54 | 122 | 151 | 130 | 92  | 83  | 97  | 57  |



|     |     |     |     |     |     |     |     |     |     |
|-----|-----|-----|-----|-----|-----|-----|-----|-----|-----|
| 20  | 20  | 15  | 165 | 210 | 176 | 186 | 153 | 172 | 63  |
| 23  | 15  | 15  | 19  | 33  | 33  | 16  | 23  | 16  | 13  |
| 47  | 36  | 31  | 68  | 88  | 66  | 78  | 58  | 71  | 42  |
| 24  | 28  | 44  | 60  | 71  | 55  | 72  | 57  | 60  | 41  |
| 22  | 23  | 27  | 26  | 35  | 35  | 30  | 38  | 43  | 23  |
| 20  | 17  | 14  | 15  | 14  | 16  | 14  | 12  | 13  | 13  |
| 30  | 35  | 38  | 259 | 424 | 307 | 232 | 192 | 243 | 107 |
| 22  | 31  | 29  | 41  | 56  | 36  | 58  | 42  | 41  | 35  |
| 58  | 56  | 64  | 183 | 239 | 216 | 146 | 120 | 134 | 73  |
| 11  | 16  | 17  | 14  | 22  | 14  | 18  | 21  | 29  | 17  |
| 34  | 48  | 35  | 56  | 69  | 49  | 49  | 43  | 39  | 33  |
| 47  | 50  | 62  | 41  | 45  | 48  | 30  | 25  | 48  | 45  |
| 22  | 20  | 23  | 31  | 38  | 36  | 29  | 25  | 37  | 22  |
| 53  | 67  | 89  | 89  | 91  | 105 | 55  | 53  | 65  | 48  |
| 101 | 106 | 99  | 152 | 175 | 161 | 124 | 104 | 123 | 77  |
| 49  | 55  | 56  | 132 | 141 | 193 | 56  | 72  | 78  | 55  |
| 95  | 100 | 115 | 95  | 139 | 98  | 86  | 77  | 95  | 71  |
| 88  | 85  | 99  | 55  | 69  | 74  | 60  | 47  | 55  | 51  |
| 77  | 87  | 81  | 68  | 95  | 76  | 75  | 65  | 59  | 42  |
| 62  | 58  | 57  | 104 | 113 | 85  | 102 | 78  | 98  | 51  |
| 136 | 124 | 135 | 117 | 160 | 179 | 83  | 65  | 76  | 60  |
| 46  | 51  | 41  | 43  | 60  | 55  | 52  | 49  | 55  | 35  |
| 163 | 192 | 198 | 144 | 185 | 171 | 194 | 184 | 175 | 200 |
| 41  | 43  | 51  | 69  | 73  | 88  | 98  | 72  | 82  | 51  |
| 19  | 22  | 33  | 23  | 43  | 35  | 47  | 39  | 44  | 24  |
| 65  | 62  | 78  | 124 | 152 | 131 | 125 | 140 | 131 | 69  |
| 96  | 104 | 106 | 155 | 206 | 178 | 183 | 172 | 184 | 119 |
| 44  | 44  | 63  | 143 | 174 | 148 | 89  | 80  | 95  | 57  |
| 42  | 61  | 68  | 39  | 36  | 43  | 76  | 65  | 82  | 71  |
| 38  | 30  | 45  | 57  | 56  | 56  | 48  | 35  | 52  | 26  |
| 37  | 28  | 64  | 257 | 308 | 225 | 231 | 244 | 262 | 89  |
| 63  | 71  | 64  | 138 | 151 | 143 | 126 | 115 | 143 | 57  |
| 64  | 73  | 57  | 57  | 81  | 57  | 73  | 52  | 67  | 40  |
| 18  | 15  | 25  | 19  | 15  | 16  | 25  | 30  | 23  | 16  |
| 64  | 58  | 53  | 123 | 129 | 107 | 121 | 97  | 129 | 67  |
| 34  | 28  | 24  | 44  | 56  | 44  | 30  | 21  | 36  | 23  |
| 37  | 36  | 39  | 39  | 47  | 49  | 50  | 33  | 38  | 36  |
| 26  | 28  | 23  | 83  | 117 | 120 | 80  | 69  | 80  | 47  |
| 35  | 39  | 40  | 32  | 64  | 46  | 31  | 37  | 34  | 43  |
| 29  | 30  | 31  | 28  | 40  | 25  | 35  | 31  | 31  | 27  |
| 18  | 24  | 17  | 13  | 21  | 21  | 20  | 24  | 15  | 10  |

|    |    |    |     |     |     |     |     |     |     |
|----|----|----|-----|-----|-----|-----|-----|-----|-----|
| 40 | 35 | 34 | 77  | 100 | 90  | 72  | 84  | 100 | 50  |
| 40 | 38 | 46 | 31  | 28  | 24  | 25  | 20  | 33  | 37  |
| 30 | 31 | 31 | 40  | 48  | 44  | 46  | 55  | 37  | 47  |
| 39 | 40 | 49 | 18  | 35  | 21  | 31  | 24  | 29  | 32  |
| 45 | 47 | 48 | 56  | 80  | 65  | 88  | 84  | 66  | 43  |
| 60 | 71 | 72 | 46  | 54  | 37  | 40  | 47  | 58  | 70  |
| 55 | 35 | 59 | 28  | 41  | 40  | 39  | 30  | 45  | 50  |
| 43 | 65 | 41 | 29  | 40  | 39  | 34  | 32  | 34  | 48  |
| 77 | 62 | 75 | 56  | 93  | 84  | 101 | 70  | 66  | 66  |
| 44 | 39 | 44 | 85  | 122 | 105 | 104 | 91  | 120 | 57  |
| 23 | 6  | 12 | 29  | 36  | 30  | 33  | 23  | 20  | 9   |
| 32 | 36 | 33 | 56  | 65  | 50  | 28  | 20  | 28  | 27  |
| 29 | 23 | 20 | 41  | 51  | 29  | 37  | 30  | 31  | 20  |
| 52 | 57 | 64 | 106 | 97  | 92  | 68  | 65  | 86  | 49  |
| 15 | 12 | 22 | 20  | 26  | 27  | 36  | 21  | 27  | 17  |
| 35 | 41 | 34 | 48  | 67  | 64  | 44  | 47  | 53  | 31  |
| 30 | 30 | 44 | 81  | 133 | 102 | 93  | 53  | 75  | 40  |
| 33 | 20 | 21 | 23  | 33  | 23  | 31  | 17  | 14  | 12  |
| 68 | 66 | 72 | 66  | 78  | 90  | 84  | 91  | 98  | 79  |
| 71 | 84 | 60 | 54  | 66  | 67  | 56  | 46  | 62  | 42  |
| 30 | 27 | 39 | 60  | 77  | 65  | 58  | 56  | 52  | 36  |
| 45 | 38 | 48 | 41  | 52  | 57  | 39  | 42  | 46  | 28  |
| 52 | 42 | 55 | 45  | 40  | 29  | 30  | 29  | 33  | 22  |
| 65 | 60 | 59 | 33  | 46  | 42  | 38  | 41  | 42  | 41  |
| 62 | 66 | 76 | 66  | 95  | 70  | 82  | 66  | 87  | 43  |
| 50 | 58 | 41 | 147 | 177 | 141 | 135 | 136 | 159 | 74  |
| 84 | 93 | 94 | 426 | 519 | 490 | 561 | 469 | 581 | 271 |
| 53 | 52 | 64 | 90  | 114 | 114 | 144 | 122 | 146 | 83  |
| 93 | 78 | 89 | 144 | 190 | 169 | 154 | 111 | 127 | 107 |
| 75 | 65 | 53 | 113 | 113 | 110 | 125 | 116 | 119 | 66  |
| 49 | 59 | 57 | 69  | 129 | 113 | 88  | 85  | 72  | 63  |
| 58 | 56 | 74 | 96  | 141 | 95  | 128 | 99  | 106 | 72  |
| 58 | 63 | 64 | 90  | 100 | 74  | 79  | 61  | 62  | 61  |
| 61 | 64 | 60 | 60  | 89  | 76  | 78  | 66  | 68  | 60  |
| 43 | 35 | 54 | 74  | 78  | 72  | 94  | 66  | 74  | 48  |
| 33 | 24 | 18 | 50  | 93  | 70  | 71  | 42  | 70  | 28  |
| 27 | 26 | 45 | 53  | 63  | 74  | 49  | 62  | 43  | 32  |
| 26 | 23 | 24 | 40  | 22  | 34  | 33  | 17  | 21  | 34  |
| 48 | 33 | 34 | 56  | 68  | 51  | 50  | 43  | 33  | 30  |
| 46 | 53 | 49 | 49  | 53  | 45  | 52  | 61  | 76  | 51  |
| 26 | 21 | 28 | 32  | 32  | 28  | 25  | 22  | 23  | 21  |

|     |     |     |     |      |     |      |      |      |     |
|-----|-----|-----|-----|------|-----|------|------|------|-----|
| 27  | 22  | 11  | 17  | 26   | 39  | 29   | 26   | 23   | 19  |
| 28  | 31  | 35  | 44  | 60   | 60  | 45   | 50   | 62   | 43  |
| 65  | 70  | 66  | 77  | 81   | 84  | 58   | 47   | 48   | 59  |
| 67  | 83  | 102 | 151 | 151  | 155 | 113  | 96   | 120  | 94  |
| 11  | 8   | 11  | 35  | 64   | 39  | 21   | 17   | 14   | 12  |
| 83  | 80  | 98  | 146 | 143  | 138 | 108  | 90   | 78   | 71  |
| 69  | 81  | 80  | 113 | 134  | 116 | 97   | 99   | 89   | 74  |
| 46  | 54  | 50  | 53  | 70   | 71  | 65   | 68   | 54   | 42  |
| 106 | 115 | 139 | 152 | 209  | 183 | 141  | 119  | 133  | 113 |
| 30  | 26  | 34  | 31  | 39   | 32  | 27   | 14   | 22   | 19  |
| 43  | 43  | 54  | 73  | 104  | 80  | 127  | 141  | 101  | 80  |
| 66  | 45  | 64  | 65  | 62   | 71  | 87   | 100  | 109  | 76  |
| 44  | 32  | 28  | 131 | 160  | 170 | 165  | 126  | 154  | 91  |
| 135 | 171 | 158 | 85  | 103  | 101 | 151  | 145  | 145  | 138 |
| 27  | 25  | 36  | 54  | 64   | 78  | 71   | 61   | 67   | 36  |
| 35  | 32  | 48  | 49  | 59   | 60  | 50   | 46   | 49   | 28  |
| 41  | 38  | 36  | 42  | 66   | 62  | 47   | 58   | 49   | 40  |
| 43  | 38  | 37  | 98  | 141  | 126 | 109  | 115  | 125  | 63  |
| 43  | 28  | 33  | 66  | 109  | 86  | 85   | 53   | 79   | 52  |
| 15  | 9   | 11  | 63  | 88   | 64  | 58   | 36   | 53   | 13  |
| 37  | 33  | 35  | 37  | 64   | 48  | 57   | 42   | 44   | 29  |
| 88  | 71  | 102 | 801 | 1016 | 903 | 1245 | 1110 | 1330 | 662 |
| 54  | 72  | 78  | 151 | 151  | 145 | 177  | 147  | 173  | 93  |
| 30  | 45  | 54  | 110 | 132  | 126 | 92   | 89   | 77   | 53  |
| 15  | 10  | 10  | 24  | 31   | 27  | 9    | 14   | 13   | 12  |
| 14  | 14  | 15  | 28  | 37   | 16  | 11   | 16   | 17   | 10  |
| 6   | 5   | 13  | 3   | 15   | 7   | 6    | 8    | 13   | 8   |
| 17  | 15  | 15  | 36  | 43   | 30  | 20   | 16   | 27   | 10  |
| 8   | 12  | 13  | 31  | 26   | 8   | 11   | 10   | 12   | 3   |
| 11  | 12  | 20  | 40  | 43   | 24  | 22   | 17   | 19   | 13  |
| 26  | 22  | 38  | 46  | 70   | 46  | 28   | 28   | 40   | 26  |
| 27  | 26  | 28  | 74  | 81   | 67  | 38   | 44   | 37   | 29  |
| 22  | 24  | 24  | 37  | 43   | 37  | 26   | 25   | 26   | 21  |
| 57  | 44  | 54  | 106 | 166  | 141 | 143  | 144  | 132  | 52  |
| 41  | 39  | 48  | 51  | 57   | 42  | 50   | 47   | 48   | 48  |
| 59  | 63  | 87  | 134 | 144  | 122 | 135  | 101  | 108  | 69  |
| 49  | 35  | 35  | 56  | 76   | 48  | 68   | 58   | 74   | 37  |
| 41  | 48  | 50  | 95  | 134  | 133 | 121  | 89   | 110  | 60  |
| 43  | 44  | 46  | 111 | 154  | 146 | 85   | 79   | 57   | 53  |
| 72  | 49  | 89  | 83  | 83   | 84  | 68   | 71   | 86   | 66  |
| 69  | 55  | 78  | 94  | 134  | 106 | 91   | 89   | 94   | 68  |

|     |     |     |     |     |     |     |     |     |    |
|-----|-----|-----|-----|-----|-----|-----|-----|-----|----|
| 43  | 43  | 46  | 56  | 93  | 80  | 65  | 61  | 55  | 35 |
| 21  | 19  | 33  | 39  | 50  | 42  | 22  | 27  | 32  | 33 |
| 34  | 28  | 44  | 48  | 43  | 30  | 22  | 29  | 30  | 33 |
| 18  | 29  | 26  | 31  | 44  | 37  | 20  | 25  | 32  | 22 |
| 58  | 47  | 55  | 58  | 87  | 58  | 65  | 35  | 55  | 37 |
| 36  | 29  | 23  | 28  | 41  | 33  | 23  | 30  | 26  | 13 |
| 32  | 27  | 36  | 40  | 46  | 48  | 35  | 25  | 34  | 29 |
| 34  | 35  | 28  | 28  | 47  | 27  | 28  | 36  | 23  | 22 |
| 32  | 25  | 35  | 29  | 59  | 53  | 36  | 35  | 32  | 31 |
| 47  | 60  | 66  | 84  | 107 | 108 | 90  | 81  | 91  | 52 |
| 10  | 15  | 17  | 42  | 60  | 47  | 45  | 35  | 30  | 24 |
| 44  | 55  | 49  | 52  | 88  | 69  | 71  | 63  | 69  | 49 |
| 39  | 45  | 41  | 54  | 79  | 64  | 50  | 50  | 53  | 37 |
| 61  | 57  | 57  | 100 | 142 | 101 | 114 | 106 | 84  | 76 |
| 33  | 34  | 33  | 145 | 180 | 147 | 112 | 94  | 109 | 53 |
| 52  | 65  | 59  | 88  | 87  | 86  | 77  | 88  | 90  | 59 |
| 46  | 60  | 60  | 115 | 137 | 125 | 102 | 79  | 105 | 62 |
| 30  | 39  | 45  | 29  | 48  | 34  | 27  | 20  | 40  | 35 |
| 77  | 63  | 62  | 88  | 109 | 95  | 101 | 101 | 103 | 80 |
| 127 | 137 | 132 | 63  | 60  | 69  | 53  | 32  | 57  | 39 |
| 28  | 34  | 28  | 58  | 96  | 58  | 29  | 38  | 49  | 27 |
| 28  | 32  | 39  | 49  | 55  | 42  | 30  | 23  | 27  | 24 |
| 51  | 55  | 45  | 47  | 50  | 47  | 50  | 34  | 49  | 45 |
| 23  | 48  | 43  | 59  | 76  | 51  | 54  | 42  | 71  | 38 |
| 24  | 20  | 22  | 27  | 35  | 23  | 24  | 25  | 21  | 19 |
| 33  | 31  | 25  | 52  | 61  | 52  | 52  | 45  | 59  | 37 |
| 24  | 20  | 31  | 128 | 165 | 95  | 83  | 102 | 81  | 36 |
| 19  | 16  | 23  | 24  | 29  | 39  | 34  | 19  | 20  | 21 |
| 9   | 19  | 10  | 12  | 17  | 15  | 11  | 9   | 10  | 11 |
| 28  | 26  | 23  | 47  | 58  | 55  | 39  | 30  | 32  | 26 |
| 18  | 21  | 15  | 23  | 37  | 27  | 22  | 19  | 29  | 16 |
| 13  | 22  | 18  | 14  | 24  | 18  | 18  | 15  | 18  | 14 |
| 19  | 12  | 22  | 53  | 86  | 66  | 63  | 51  | 51  | 39 |
| 49  | 60  | 55  | 124 | 164 | 140 | 120 | 98  | 89  | 60 |
| 49  | 57  | 51  | 163 | 184 | 167 | 167 | 153 | 167 | 78 |
| 13  | 11  | 19  | 19  | 23  | 25  | 17  | 21  | 31  | 14 |
| 64  | 66  | 62  | 80  | 121 | 108 | 77  | 64  | 88  | 60 |
| 48  | 58  | 53  | 131 | 184 | 178 | 69  | 72  | 85  | 60 |
| 44  | 44  | 51  | 66  | 72  | 66  | 77  | 64  | 67  | 31 |
| 62  | 63  | 57  | 116 | 147 | 135 | 91  | 86  | 90  | 55 |
| 102 | 122 | 127 | 92  | 120 | 109 | 71  | 76  | 61  | 51 |

|     |     |     |     |     |     |     |     |     |     |
|-----|-----|-----|-----|-----|-----|-----|-----|-----|-----|
| 24  | 47  | 32  | 41  | 54  | 58  | 53  | 42  | 51  | 38  |
| 69  | 72  | 95  | 57  | 91  | 74  | 66  | 70  | 62  | 65  |
| 87  | 69  | 104 | 49  | 75  | 75  | 73  | 82  | 88  | 63  |
| 20  | 32  | 30  | 23  | 30  | 27  | 22  | 26  | 25  | 25  |
| 12  | 15  | 16  | 23  | 25  | 21  | 14  | 14  | 20  | 10  |
| 34  | 43  | 37  | 31  | 39  | 51  | 44  | 44  | 40  | 30  |
| 54  | 62  | 60  | 148 | 167 | 175 | 143 | 140 | 158 | 72  |
| 21  | 28  | 24  | 22  | 21  | 24  | 22  | 23  | 17  | 24  |
| 63  | 64  | 73  | 58  | 88  | 98  | 55  | 51  | 56  | 53  |
| 41  | 46  | 55  | 207 | 248 | 223 | 264 | 280 | 246 | 123 |
| 51  | 54  | 68  | 109 | 109 | 109 | 90  | 113 | 95  | 67  |
| 61  | 69  | 90  | 101 | 115 | 91  | 77  | 87  | 115 | 73  |
| 63  | 59  | 58  | 51  | 75  | 66  | 69  | 68  | 70  | 69  |
| 74  | 50  | 73  | 54  | 78  | 71  | 62  | 44  | 67  | 39  |
| 53  | 55  | 49  | 39  | 60  | 38  | 47  | 38  | 42  | 35  |
| 48  | 42  | 40  | 44  | 81  | 58  | 86  | 74  | 85  | 56  |
| 39  | 56  | 70  | 65  | 58  | 60  | 47  | 47  | 53  | 45  |
| 77  | 76  | 94  | 69  | 78  | 60  | 75  | 64  | 68  | 64  |
| 22  | 15  | 27  | 28  | 30  | 19  | 27  | 27  | 25  | 25  |
| 87  | 91  | 94  | 66  | 92  | 58  | 112 | 91  | 105 | 81  |
| 55  | 53  | 61  | 55  | 75  | 63  | 70  | 50  | 53  | 64  |
| 82  | 81  | 85  | 133 | 162 | 145 | 176 | 194 | 169 | 86  |
| 46  | 53  | 52  | 74  | 90  | 80  | 67  | 63  | 73  | 51  |
| 77  | 66  | 69  | 117 | 153 | 149 | 126 | 101 | 136 | 64  |
| 73  | 79  | 83  | 161 | 199 | 167 | 161 | 169 | 173 | 86  |
| 80  | 90  | 82  | 98  | 142 | 140 | 128 | 124 | 116 | 72  |
| 44  | 33  | 47  | 46  | 48  | 41  | 47  | 48  | 50  | 27  |
| 18  | 33  | 31  | 25  | 27  | 25  | 24  | 28  | 17  | 15  |
| 19  | 23  | 12  | 21  | 25  | 22  | 22  | 25  | 27  | 24  |
| 45  | 36  | 34  | 38  | 59  | 53  | 31  | 37  | 37  | 29  |
| 56  | 41  | 53  | 56  | 71  | 76  | 89  | 115 | 107 | 66  |
| 116 | 113 | 110 | 208 | 254 | 209 | 185 | 150 | 169 | 116 |
| 86  | 79  | 85  | 107 | 152 | 154 | 155 | 114 | 121 | 95  |
| 74  | 82  | 81  | 103 | 140 | 136 | 87  | 92  | 110 | 74  |
| 59  | 65  | 76  | 102 | 153 | 138 | 125 | 113 | 127 | 80  |
| 29  | 22  | 36  | 71  | 90  | 88  | 92  | 69  | 72  | 40  |
| 43  | 37  | 41  | 47  | 72  | 48  | 36  | 35  | 43  | 26  |
| 19  | 33  | 38  | 25  | 23  | 19  | 17  | 21  | 29  | 24  |
| 27  | 34  | 49  | 46  | 74  | 51  | 43  | 34  | 59  | 42  |
| 47  | 43  | 41  | 20  | 44  | 28  | 28  | 22  | 41  | 34  |
| 14  | 14  | 17  | 48  | 49  | 31  | 38  | 36  | 31  | 19  |

|     |     |     |     |     |     |     |     |     |     |
|-----|-----|-----|-----|-----|-----|-----|-----|-----|-----|
| 55  | 52  | 55  | 114 | 148 | 110 | 86  | 66  | 96  | 62  |
| 29  | 38  | 36  | 80  | 108 | 101 | 99  | 79  | 73  | 55  |
| 15  | 8   | 9   | 38  | 45  | 25  | 14  | 9   | 11  | 9   |
| 23  | 26  | 19  | 45  | 51  | 38  | 38  | 32  | 37  | 17  |
| 35  | 44  | 36  | 38  | 42  | 46  | 48  | 30  | 43  | 35  |
| 58  | 52  | 57  | 41  | 50  | 43  | 71  | 53  | 64  | 54  |
| 42  | 33  | 37  | 56  | 80  | 62  | 56  | 55  | 53  | 43  |
| 54  | 39  | 31  | 91  | 112 | 97  | 118 | 92  | 98  | 49  |
| 32  | 29  | 23  | 184 | 252 | 209 | 169 | 189 | 198 | 73  |
| 14  | 36  | 24  | 67  | 111 | 91  | 78  | 73  | 73  | 36  |
| 59  | 70  | 55  | 51  | 78  | 82  | 47  | 44  | 42  | 52  |
| 83  | 96  | 85  | 39  | 62  | 42  | 118 | 101 | 113 | 73  |
| 33  | 47  | 25  | 47  | 54  | 55  | 76  | 43  | 72  | 28  |
| 41  | 34  | 43  | 126 | 145 | 153 | 124 | 126 | 153 | 45  |
| 36  | 34  | 55  | 56  | 62  | 38  | 42  | 51  | 58  | 37  |
| 41  | 40  | 47  | 41  | 60  | 49  | 49  | 49  | 43  | 45  |
| 96  | 106 | 94  | 95  | 104 | 102 | 94  | 93  | 95  | 79  |
| 18  | 22  | 22  | 28  | 20  | 35  | 27  | 34  | 33  | 21  |
| 15  | 22  | 19  | 9   | 6   | 9   | 16  | 13  | 10  | 17  |
| 23  | 34  | 38  | 39  | 64  | 50  | 44  | 38  | 51  | 29  |
| 84  | 93  | 90  | 105 | 149 | 111 | 135 | 120 | 155 | 82  |
| 38  | 54  | 62  | 130 | 161 | 119 | 89  | 83  | 93  | 48  |
| 26  | 33  | 44  | 40  | 38  | 33  | 30  | 34  | 37  | 34  |
| 108 | 106 | 115 | 117 | 110 | 99  | 149 | 132 | 121 | 104 |
| 20  | 37  | 21  | 16  | 19  | 15  | 23  | 21  | 29  | 16  |
| 33  | 40  | 32  | 46  | 73  | 68  | 60  | 69  | 58  | 39  |
| 22  | 28  | 22  | 46  | 62  | 44  | 46  | 45  | 50  | 24  |
| 16  | 21  | 14  | 42  | 52  | 48  | 52  | 59  | 82  | 37  |
| 24  | 18  | 14  | 19  | 17  | 11  | 19  | 26  | 15  | 17  |
| 41  | 33  | 29  | 43  | 51  | 52  | 65  | 50  | 52  | 35  |
| 45  | 59  | 46  | 36  | 43  | 59  | 65  | 43  | 61  | 51  |
| 47  | 55  | 56  | 67  | 91  | 76  | 68  | 57  | 88  | 56  |
| 50  | 48  | 38  | 42  | 40  | 45  | 66  | 38  | 53  | 42  |
| 33  | 42  | 52  | 55  | 81  | 60  | 69  | 56  | 80  | 52  |
| 51  | 56  | 50  | 65  | 76  | 62  | 61  | 36  | 70  | 33  |
| 79  | 75  | 72  | 118 | 141 | 112 | 149 | 127 | 131 | 81  |
| 61  | 59  | 84  | 52  | 65  | 62  | 79  | 75  | 65  | 58  |
| 39  | 66  | 67  | 89  | 110 | 92  | 84  | 101 | 93  | 57  |
| 73  | 69  | 80  | 98  | 142 | 122 | 153 | 155 | 156 | 93  |
| 37  | 29  | 40  | 31  | 29  | 34  | 48  | 39  | 45  | 24  |
| 48  | 48  | 61  | 58  | 88  | 60  | 71  | 57  | 77  | 62  |

|    |    |    |     |     |     |     |     |     |     |
|----|----|----|-----|-----|-----|-----|-----|-----|-----|
| 38 | 30 | 43 | 54  | 68  | 70  | 67  | 59  | 44  | 33  |
| 19 | 29 | 25 | 22  | 36  | 26  | 28  | 20  | 29  | 29  |
| 28 | 23 | 26 | 40  | 60  | 65  | 70  | 52  | 80  | 52  |
| 36 | 35 | 32 | 12  | 13  | 27  | 27  | 9   | 20  | 33  |
| 36 | 35 | 37 | 29  | 37  | 31  | 43  | 41  | 47  | 35  |
| 23 | 17 | 14 | 56  | 60  | 77  | 40  | 49  | 53  | 38  |
| 37 | 26 | 38 | 36  | 48  | 37  | 36  | 32  | 43  | 36  |
| 27 | 25 | 26 | 22  | 44  | 35  | 33  | 27  | 37  | 29  |
| 41 | 39 | 33 | 18  | 34  | 28  | 30  | 19  | 22  | 22  |
| 58 | 44 | 35 | 22  | 30  | 33  | 33  | 33  | 36  | 35  |
| 37 | 31 | 40 | 71  | 88  | 83  | 65  | 77  | 82  | 55  |
| 18 | 19 | 18 | 48  | 54  | 41  | 40  | 31  | 52  | 20  |
| 22 | 6  | 13 | 18  | 29  | 18  | 21  | 19  | 23  | 10  |
| 16 | 16 | 20 | 110 | 174 | 109 | 123 | 76  | 103 | 30  |
| 19 | 9  | 17 | 48  | 65  | 41  | 37  | 26  | 19  | 16  |
| 13 | 16 | 22 | 42  | 64  | 68  | 31  | 35  | 39  | 24  |
| 27 | 32 | 37 | 83  | 118 | 81  | 70  | 58  | 65  | 43  |
| 48 | 37 | 48 | 123 | 150 | 119 | 108 | 77  | 101 | 48  |
| 30 | 23 | 28 | 77  | 121 | 87  | 48  | 57  | 51  | 39  |
| 57 | 31 | 56 | 300 | 402 | 328 | 352 | 321 | 341 | 121 |
| 36 | 38 | 44 | 73  | 93  | 72  | 58  | 46  | 34  | 43  |
| 28 | 25 | 28 | 36  | 35  | 40  | 28  | 26  | 42  | 30  |
| 62 | 54 | 60 | 45  | 68  | 47  | 57  | 62  | 67  | 36  |
| 50 | 72 | 58 | 108 | 138 | 94  | 79  | 71  | 70  | 47  |
| 18 | 5  | 11 | 16  | 11  | 10  | 8   | 11  | 15  | 5   |
| 24 | 22 | 29 | 25  | 48  | 33  | 13  | 20  | 16  | 30  |
| 26 | 27 | 38 | 25  | 31  | 19  | 29  | 28  | 46  | 30  |
| 49 | 49 | 52 | 29  | 38  | 34  | 24  | 29  | 33  | 31  |
| 32 | 33 | 18 | 17  | 23  | 14  | 19  | 17  | 13  | 16  |
| 40 | 43 | 57 | 53  | 64  | 60  | 46  | 50  | 39  | 41  |
| 4  | 7  | 6  | 2   | 4   | 2   | 5   | 3   | 5   | 7   |
| 17 | 23 | 16 | 31  | 22  | 18  | 18  | 24  | 21  | 19  |
| 37 | 33 | 40 | 182 | 209 | 156 | 125 | 117 | 109 | 52  |
| 27 | 24 | 22 | 30  | 41  | 28  | 40  | 26  | 19  | 19  |
| 33 | 49 | 48 | 121 | 169 | 132 | 146 | 112 | 127 | 59  |
| 8  | 15 | 11 | 45  | 37  | 32  | 20  | 20  | 28  | 10  |
| 21 | 32 | 24 | 112 | 174 | 137 | 100 | 76  | 97  | 47  |
| 10 | 17 | 15 | 25  | 34  | 16  | 19  | 20  | 16  | 9   |
| 14 | 30 | 25 | 25  | 27  | 27  | 30  | 23  | 25  | 22  |
| 16 | 14 | 23 | 10  | 13  | 12  | 12  | 12  | 12  | 14  |
| 11 | 14 | 10 | 11  | 12  | 22  | 17  | 8   | 14  | 12  |

|    |    |     |     |     |     |     |     |     |     |
|----|----|-----|-----|-----|-----|-----|-----|-----|-----|
| 20 | 32 | 28  | 36  | 51  | 38  | 48  | 25  | 23  | 17  |
| 16 | 21 | 15  | 42  | 42  | 34  | 39  | 22  | 35  | 19  |
| 18 | 33 | 19  | 36  | 42  | 48  | 45  | 25  | 40  | 34  |
| 9  | 11 | 8   | 5   | 8   | 8   | 5   | 7   | 9   | 6   |
| 8  | 14 | 8   | 14  | 17  | 25  | 21  | 8   | 10  | 13  |
| 79 | 85 | 81  | 70  | 100 | 85  | 122 | 142 | 177 | 91  |
| 77 | 82 | 92  | 57  | 71  | 68  | 97  | 104 | 115 | 86  |
| 79 | 65 | 90  | 92  | 134 | 121 | 209 | 227 | 233 | 98  |
| 28 | 21 | 20  | 25  | 29  | 31  | 33  | 43  | 27  | 16  |
| 53 | 42 | 60  | 99  | 97  | 96  | 128 | 104 | 140 | 69  |
| 16 | 31 | 26  | 40  | 51  | 48  | 52  | 49  | 58  | 30  |
| 62 | 43 | 55  | 149 | 177 | 158 | 116 | 107 | 130 | 72  |
| 33 | 37 | 46  | 37  | 52  | 31  | 33  | 40  | 37  | 33  |
| 89 | 77 | 112 | 81  | 115 | 85  | 122 | 114 | 123 | 75  |
| 68 | 74 | 71  | 169 | 208 | 164 | 209 | 194 | 198 | 102 |
| 45 | 37 | 30  | 63  | 73  | 64  | 49  | 55  | 58  | 41  |
| 25 | 33 | 28  | 39  | 49  | 22  | 34  | 32  | 40  | 27  |
| 14 | 23 | 21  | 23  | 31  | 33  | 22  | 23  | 16  | 19  |
| 37 | 40 | 31  | 34  | 29  | 22  | 38  | 28  | 29  | 41  |
| 24 | 20 | 30  | 15  | 24  | 30  | 25  | 30  | 25  | 32  |
| 60 | 56 | 62  | 43  | 64  | 66  | 49  | 52  | 49  | 47  |
| 43 | 66 | 66  | 46  | 45  | 42  | 47  | 47  | 38  | 59  |
| 24 | 35 | 46  | 19  | 27  | 26  | 22  | 26  | 19  | 32  |
| 65 | 74 | 60  | 38  | 47  | 52  | 52  | 48  | 49  | 58  |
| 37 | 38 | 55  | 50  | 79  | 63  | 77  | 64  | 77  | 44  |
| 26 | 28 | 17  | 31  | 46  | 40  | 35  | 33  | 34  | 24  |
| 19 | 22 | 19  | 49  | 78  | 43  | 69  | 64  | 61  | 34  |
| 16 | 9  | 18  | 35  | 52  | 43  | 35  | 40  | 54  | 19  |
| 34 | 26 | 29  | 75  | 122 | 82  | 86  | 58  | 62  | 38  |
| 45 | 42 | 42  | 129 | 153 | 118 | 146 | 146 | 168 | 66  |
| 40 | 38 | 60  | 59  | 71  | 83  | 77  | 61  | 77  | 53  |
| 48 | 37 | 51  | 147 | 206 | 169 | 109 | 112 | 115 | 59  |
| 85 | 66 | 64  | 157 | 176 | 139 | 204 | 194 | 200 | 84  |
| 40 | 45 | 45  | 189 | 218 | 216 | 156 | 157 | 161 | 72  |
| 48 | 48 | 59  | 152 | 176 | 193 | 184 | 208 | 161 | 86  |
| 22 | 26 | 24  | 49  | 45  | 40  | 38  | 30  | 30  | 26  |
| 11 | 17 | 21  | 14  | 17  | 17  | 21  | 27  | 23  | 11  |
| 30 | 30 | 41  | 51  | 60  | 52  | 58  | 49  | 67  | 42  |
| 39 | 32 | 36  | 51  | 46  | 38  | 39  | 36  | 43  | 22  |
| 31 | 36 | 45  | 98  | 123 | 97  | 128 | 101 | 118 | 49  |
| 12 | 11 | 14  | 11  | 21  | 15  | 15  | 14  | 14  | 10  |



|    |     |     |     |     |     |     |     |     |     |
|----|-----|-----|-----|-----|-----|-----|-----|-----|-----|
| 25 | 17  | 27  | 42  | 34  | 36  | 31  | 28  | 40  | 29  |
| 41 | 48  | 30  | 57  | 60  | 69  | 61  | 54  | 63  | 52  |
| 40 | 44  | 48  | 99  | 88  | 98  | 71  | 78  | 66  | 49  |
| 60 | 59  | 56  | 54  | 61  | 54  | 57  | 63  | 51  | 48  |
| 17 | 16  | 9   | 33  | 33  | 30  | 34  | 45  | 33  | 25  |
| 42 | 43  | 32  | 42  | 54  | 58  | 50  | 54  | 36  | 30  |
| 40 | 38  | 40  | 70  | 80  | 74  | 66  | 55  | 63  | 32  |
| 78 | 82  | 106 | 102 | 129 | 119 | 101 | 101 | 97  | 75  |
| 47 | 53  | 62  | 48  | 70  | 49  | 54  | 58  | 51  | 47  |
| 29 | 31  | 35  | 28  | 25  | 22  | 23  | 16  | 23  | 24  |
| 34 | 38  | 48  | 43  | 48  | 57  | 22  | 29  | 36  | 33  |
| 72 | 68  | 69  | 54  | 78  | 48  | 55  | 48  | 47  | 60  |
| 70 | 77  | 82  | 104 | 91  | 100 | 124 | 101 | 110 | 72  |
| 90 | 112 | 99  | 128 | 141 | 121 | 112 | 107 | 134 | 80  |
| 58 | 72  | 79  | 141 | 202 | 171 | 174 | 143 | 179 | 94  |
| 81 | 85  | 77  | 83  | 104 | 128 | 69  | 61  | 78  | 58  |
| 73 | 60  | 83  | 71  | 85  | 75  | 40  | 41  | 51  | 41  |
| 55 | 54  | 46  | 42  | 54  | 41  | 41  | 28  | 37  | 28  |
| 46 | 45  | 50  | 105 | 133 | 117 | 64  | 84  | 99  | 51  |
| 39 | 37  | 50  | 40  | 48  | 59  | 67  | 52  | 48  | 35  |
| 49 | 48  | 42  | 62  | 84  | 63  | 55  | 60  | 55  | 33  |
| 35 | 34  | 33  | 48  | 75  | 64  | 46  | 40  | 54  | 35  |
| 44 | 46  | 49  | 85  | 102 | 86  | 88  | 101 | 78  | 72  |
| 26 | 39  | 30  | 57  | 57  | 54  | 37  | 43  | 50  | 39  |
| 46 | 49  | 62  | 106 | 114 | 101 | 97  | 89  | 90  | 62  |
| 89 | 73  | 81  | 45  | 48  | 49  | 71  | 76  | 56  | 54  |
| 81 | 99  | 99  | 106 | 150 | 122 | 118 | 111 | 103 | 82  |
| 70 | 53  | 54  | 157 | 174 | 156 | 178 | 170 | 183 | 103 |
| 40 | 48  | 41  | 72  | 112 | 88  | 71  | 75  | 71  | 50  |
| 83 | 71  | 88  | 106 | 148 | 143 | 240 | 189 | 183 | 124 |
| 12 | 13  | 16  | 6   | 14  | 5   | 9   | 6   | 15  | 18  |
| 49 | 46  | 33  | 75  | 78  | 69  | 72  | 72  | 87  | 48  |
| 52 | 53  | 45  | 203 | 290 | 291 | 335 | 289 | 352 | 156 |
| 36 | 40  | 56  | 62  | 76  | 60  | 63  | 65  | 70  | 48  |
| 40 | 36  | 48  | 110 | 126 | 121 | 124 | 131 | 128 | 62  |
| 63 | 69  | 63  | 64  | 68  | 54  | 59  | 68  | 73  | 58  |
| 32 | 30  | 31  | 21  | 31  | 20  | 34  | 39  | 36  | 24  |
| 48 | 35  | 60  | 68  | 95  | 93  | 93  | 85  | 101 | 53  |
| 57 | 54  | 45  | 56  | 57  | 65  | 80  | 75  | 79  | 55  |
| 45 | 67  | 63  | 169 | 225 | 177 | 162 | 173 | 162 | 98  |
| 36 | 32  | 41  | 21  | 23  | 23  | 43  | 39  | 44  | 29  |

|    |    |    |     |     |     |     |     |     |     |
|----|----|----|-----|-----|-----|-----|-----|-----|-----|
| 37 | 68 | 61 | 61  | 70  | 65  | 81  | 59  | 103 | 64  |
| 29 | 22 | 28 | 10  | 9   | 22  | 13  | 12  | 8   | 27  |
| 27 | 20 | 22 | 15  | 18  | 20  | 30  | 13  | 21  | 16  |
| 28 | 38 | 24 | 32  | 35  | 31  | 29  | 38  | 37  | 28  |
| 33 | 31 | 49 | 34  | 38  | 26  | 47  | 43  | 21  | 36  |
| 37 | 39 | 52 | 25  | 30  | 36  | 42  | 44  | 41  | 45  |
| 47 | 54 | 43 | 15  | 23  | 16  | 34  | 35  | 42  | 34  |
| 37 | 40 | 44 | 26  | 34  | 29  | 29  | 51  | 40  | 38  |
| 36 | 33 | 49 | 18  | 30  | 34  | 39  | 38  | 37  | 26  |
| 43 | 42 | 40 | 66  | 56  | 56  | 48  | 41  | 33  | 28  |
| 37 | 33 | 38 | 18  | 35  | 31  | 24  | 28  | 23  | 32  |
| 44 | 40 | 41 | 69  | 98  | 82  | 102 | 82  | 73  | 48  |
| 49 | 35 | 35 | 44  | 52  | 34  | 50  | 36  | 46  | 36  |
| 49 | 55 | 49 | 53  | 74  | 62  | 68  | 58  | 52  | 47  |
| 23 | 28 | 31 | 22  | 23  | 21  | 33  | 20  | 28  | 19  |
| 25 | 29 | 23 | 10  | 24  | 23  | 12  | 12  | 25  | 22  |
| 36 | 35 | 34 | 51  | 49  | 44  | 53  | 57  | 59  | 31  |
| 34 | 33 | 38 | 150 | 200 | 171 | 173 | 178 | 186 | 93  |
| 29 | 36 | 30 | 64  | 56  | 50  | 61  | 41  | 42  | 27  |
| 39 | 48 | 48 | 77  | 94  | 102 | 80  | 75  | 85  | 46  |
| 27 | 30 | 30 | 66  | 99  | 84  | 52  | 56  | 55  | 43  |
| 56 | 63 | 64 | 59  | 85  | 65  | 61  | 40  | 48  | 29  |
| 46 | 36 | 44 | 80  | 94  | 86  | 69  | 64  | 80  | 49  |
| 31 | 35 | 38 | 44  | 45  | 45  | 34  | 34  | 39  | 31  |
| 52 | 58 | 56 | 138 | 205 | 190 | 191 | 190 | 193 | 80  |
| 36 | 40 | 41 | 57  | 64  | 59  | 49  | 46  | 49  | 47  |
| 37 | 45 | 38 | 101 | 115 | 118 | 101 | 76  | 101 | 52  |
| 51 | 77 | 68 | 57  | 77  | 50  | 64  | 54  | 59  | 55  |
| 25 | 18 | 23 | 24  | 46  | 39  | 62  | 59  | 73  | 38  |
| 21 | 23 | 24 | 24  | 34  | 30  | 26  | 38  | 41  | 29  |
| 70 | 47 | 79 | 83  | 132 | 112 | 170 | 160 | 190 | 90  |
| 51 | 45 | 54 | 120 | 147 | 123 | 210 | 196 | 221 | 119 |
| 46 | 49 | 43 | 112 | 115 | 122 | 179 | 137 | 159 | 69  |
| 23 | 25 | 25 | 28  | 29  | 18  | 26  | 20  | 32  | 20  |
| 47 | 73 | 72 | 99  | 99  | 101 | 133 | 89  | 108 | 85  |
| 64 | 75 | 83 | 125 | 187 | 175 | 287 | 260 | 278 | 134 |
| 70 | 51 | 83 | 69  | 105 | 98  | 78  | 73  | 76  | 61  |
| 14 | 17 | 14 | 12  | 11  | 7   | 9   | 10  | 11  | 14  |
| 48 | 78 | 40 | 36  | 44  | 46  | 42  | 39  | 61  | 39  |
| 46 | 65 | 54 | 48  | 48  | 53  | 59  | 27  | 60  | 40  |
| 32 | 29 | 44 | 33  | 36  | 41  | 40  | 39  | 39  | 26  |

|     |     |     |     |     |     |     |     |     |     |
|-----|-----|-----|-----|-----|-----|-----|-----|-----|-----|
| 48  | 71  | 72  | 120 | 116 | 153 | 138 | 129 | 126 | 81  |
| 32  | 41  | 46  | 29  | 22  | 30  | 46  | 33  | 32  | 32  |
| 5   | 4   | 5   | 2   | 1   | 2   | 7   | 2   | 1   | 7   |
| 58  | 47  | 75  | 56  | 69  | 71  | 83  | 64  | 77  | 65  |
| 56  | 76  | 70  | 81  | 97  | 97  | 90  | 82  | 97  | 56  |
| 49  | 78  | 66  | 77  | 102 | 81  | 77  | 61  | 75  | 47  |
| 43  | 46  | 54  | 56  | 58  | 61  | 49  | 47  | 60  | 32  |
| 28  | 26  | 30  | 19  | 21  | 22  | 15  | 22  | 22  | 17  |
| 36  | 62  | 60  | 149 | 173 | 162 | 183 | 145 | 174 | 92  |
| 51  | 56  | 61  | 73  | 120 | 86  | 68  | 45  | 50  | 55  |
| 34  | 46  | 44  | 47  | 40  | 52  | 39  | 35  | 34  | 37  |
| 42  | 34  | 40  | 49  | 53  | 51  | 49  | 36  | 47  | 40  |
| 50  | 62  | 60  | 27  | 48  | 28  | 32  | 43  | 32  | 42  |
| 38  | 47  | 50  | 69  | 71  | 71  | 34  | 32  | 50  | 44  |
| 61  | 38  | 50  | 49  | 71  | 72  | 76  | 79  | 87  | 53  |
| 40  | 53  | 40  | 32  | 39  | 39  | 44  | 34  | 28  | 34  |
| 16  | 18  | 18  | 32  | 52  | 42  | 59  | 52  | 45  | 35  |
| 33  | 40  | 44  | 31  | 33  | 37  | 38  | 29  | 31  | 31  |
| 45  | 42  | 42  | 33  | 57  | 50  | 44  | 40  | 46  | 33  |
| 13  | 16  | 15  | 13  | 11  | 12  | 18  | 21  | 14  | 10  |
| 9   | 13  | 7   | 34  | 23  | 26  | 13  | 18  | 16  | 11  |
| 32  | 33  | 35  | 128 | 141 | 114 | 93  | 75  | 89  | 39  |
| 39  | 45  | 45  | 62  | 75  | 62  | 55  | 61  | 65  | 45  |
| 20  | 17  | 13  | 22  | 27  | 33  | 26  | 22  | 31  | 16  |
| 26  | 39  | 36  | 35  | 53  | 47  | 48  | 37  | 27  | 23  |
| 42  | 29  | 36  | 58  | 63  | 68  | 53  | 61  | 51  | 41  |
| 41  | 58  | 55  | 97  | 106 | 82  | 99  | 87  | 100 | 70  |
| 37  | 35  | 35  | 98  | 97  | 106 | 80  | 78  | 84  | 46  |
| 8   | 12  | 13  | 19  | 17  | 16  | 17  | 10  | 14  | 11  |
| 33  | 37  | 42  | 50  | 38  | 42  | 47  | 44  | 36  | 52  |
| 15  | 14  | 11  | 16  | 21  | 17  | 21  | 21  | 16  | 12  |
| 17  | 19  | 28  | 14  | 23  | 27  | 17  | 20  | 13  | 10  |
| 10  | 16  | 19  | 6   | 9   | 4   | 9   | 7   | 13  | 9   |
| 21  | 26  | 25  | 13  | 16  | 19  | 16  | 15  | 17  | 22  |
| 12  | 7   | 16  | 8   | 9   | 7   | 5   | 11  | 9   | 13  |
| 34  | 57  | 39  | 23  | 30  | 25  | 25  | 21  | 28  | 42  |
| 17  | 9   | 22  | 12  | 11  | 13  | 15  | 15  | 9   | 19  |
| 52  | 35  | 61  | 32  | 46  | 39  | 46  | 41  | 45  | 38  |
| 33  | 34  | 33  | 26  | 24  | 38  | 30  | 28  | 28  | 32  |
| 17  | 17  | 18  | 12  | 21  | 14  | 20  | 14  | 7   | 16  |
| 141 | 133 | 138 | 114 | 168 | 124 | 176 | 141 | 151 | 150 |

|     |     |     |     |     |     |     |     |     |    |
|-----|-----|-----|-----|-----|-----|-----|-----|-----|----|
| 19  | 24  | 28  | 31  | 39  | 38  | 33  | 34  | 31  | 26 |
| 35  | 24  | 36  | 50  | 85  | 56  | 64  | 49  | 50  | 30 |
| 40  | 54  | 45  | 59  | 82  | 57  | 70  | 75  | 79  | 43 |
| 104 | 107 | 121 | 128 | 159 | 146 | 145 | 146 | 177 | 95 |
| 42  | 31  | 43  | 53  | 65  | 53  | 76  | 60  | 77  | 46 |
| 50  | 48  | 47  | 74  | 93  | 74  | 113 | 114 | 101 | 58 |
| 29  | 33  | 26  | 48  | 80  | 66  | 80  | 65  | 71  | 37 |
| 35  | 39  | 45  | 62  | 75  | 61  | 62  | 43  | 48  | 47 |
| 40  | 31  | 51  | 88  | 100 | 88  | 74  | 70  | 60  | 48 |
| 16  | 32  | 34  | 42  | 28  | 31  | 19  | 26  | 23  | 22 |
| 38  | 39  | 48  | 17  | 49  | 47  | 37  | 36  | 43  | 33 |
| 28  | 19  | 23  | 36  | 35  | 42  | 35  | 20  | 19  | 25 |
| 27  | 16  | 23  | 13  | 17  | 9   | 12  | 12  | 8   | 20 |
| 32  | 19  | 22  | 20  | 31  | 18  | 29  | 32  | 27  | 33 |
| 20  | 27  | 28  | 17  | 12  | 14  | 18  | 9   | 17  | 25 |
| 58  | 55  | 63  | 91  | 97  | 96  | 104 | 109 | 85  | 53 |
| 58  | 59  | 63  | 55  | 66  | 71  | 48  | 42  | 44  | 48 |
| 32  | 32  | 49  | 60  | 51  | 57  | 47  | 37  | 47  | 26 |
| 44  | 63  | 53  | 122 | 168 | 154 | 115 | 102 | 122 | 89 |
| 57  | 57  | 65  | 83  | 111 | 115 | 88  | 109 | 87  | 83 |
| 30  | 30  | 39  | 40  | 50  | 46  | 48  | 41  | 46  | 37 |
| 40  | 41  | 33  | 37  | 31  | 44  | 77  | 63  | 78  | 50 |
| 33  | 48  | 33  | 34  | 38  | 29  | 31  | 26  | 40  | 25 |
| 45  | 49  | 43  | 44  | 64  | 54  | 87  | 68  | 77  | 65 |
| 47  | 48  | 58  | 49  | 59  | 41  | 78  | 76  | 73  | 49 |
| 46  | 40  | 46  | 49  | 66  | 49  | 54  | 62  | 57  | 46 |
| 21  | 15  | 23  | 29  | 37  | 24  | 27  | 23  | 27  | 20 |
| 38  | 36  | 45  | 84  | 117 | 74  | 87  | 75  | 108 | 36 |
| 43  | 37  | 53  | 27  | 23  | 22  | 57  | 50  | 55  | 45 |
| 32  | 38  | 36  | 32  | 39  | 22  | 13  | 16  | 34  | 20 |
| 13  | 19  | 14  | 7   | 6   | 10  | 5   | 12  | 3   | 12 |
| 30  | 27  | 44  | 82  | 101 | 102 | 79  | 68  | 59  | 44 |
| 7   | 6   | 13  | 7   | 10  | 3   | 3   | 3   | 6   | 8  |
| 35  | 49  | 37  | 30  | 42  | 34  | 37  | 25  | 41  | 35 |
| 30  | 22  | 33  | 40  | 48  | 48  | 32  | 23  | 26  | 25 |
| 52  | 51  | 59  | 54  | 75  | 39  | 52  | 28  | 43  | 54 |
| 23  | 23  | 30  | 14  | 19  | 22  | 17  | 16  | 20  | 24 |
| 12  | 17  | 19  | 19  | 22  | 30  | 11  | 16  | 16  | 15 |
| 15  | 9   | 15  | 12  | 14  | 15  | 13  | 14  | 12  | 9  |
| 17  | 26  | 19  | 13  | 7   | 12  | 22  | 11  | 20  | 15 |
| 25  | 24  | 26  | 13  | 15  | 11  | 9   | 11  | 13  | 23 |

|    |    |     |     |     |     |     |     |     |     |
|----|----|-----|-----|-----|-----|-----|-----|-----|-----|
| 73 | 68 | 100 | 291 | 354 | 332 | 232 | 211 | 240 | 114 |
| 45 | 49 | 55  | 53  | 68  | 64  | 67  | 56  | 61  | 43  |
| 15 | 17 | 21  | 6   | 17  | 15  | 14  | 5   | 10  | 20  |
| 87 | 75 | 69  | 64  | 91  | 84  | 81  | 69  | 105 | 74  |
| 37 | 40 | 31  | 21  | 29  | 20  | 12  | 19  | 12  | 32  |
| 48 | 33 | 52  | 25  | 39  | 33  | 51  | 30  | 43  | 54  |
| 33 | 44 | 43  | 55  | 59  | 50  | 61  | 56  | 69  | 43  |
| 35 | 38 | 23  | 47  | 49  | 50  | 34  | 32  | 37  | 39  |
| 28 | 22 | 30  | 45  | 68  | 54  | 45  | 41  | 41  | 19  |
| 28 | 32 | 26  | 58  | 82  | 50  | 34  | 39  | 61  | 29  |
| 19 | 26 | 36  | 36  | 52  | 47  | 33  | 42  | 27  | 27  |
| 75 | 62 | 68  | 63  | 89  | 76  | 67  | 70  | 65  | 54  |
| 54 | 55 | 69  | 48  | 50  | 53  | 45  | 56  | 64  | 63  |
| 13 | 13 | 10  | 23  | 37  | 30  | 22  | 25  | 19  | 15  |
| 45 | 35 | 51  | 56  | 61  | 65  | 45  | 42  | 54  | 54  |
| 33 | 45 | 39  | 52  | 56  | 43  | 41  | 43  | 46  | 40  |
| 52 | 54 | 52  | 30  | 62  | 37  | 47  | 50  | 62  | 38  |
| 60 | 66 | 73  | 242 | 313 | 261 | 166 | 171 | 178 | 76  |
| 80 | 89 | 84  | 124 | 159 | 148 | 105 | 87  | 106 | 72  |
| 32 | 21 | 35  | 53  | 71  | 48  | 46  | 30  | 46  | 28  |
| 42 | 33 | 36  | 84  | 135 | 107 | 72  | 62  | 71  | 49  |
| 47 | 59 | 53  | 59  | 75  | 53  | 95  | 84  | 92  | 55  |
| 28 | 41 | 59  | 75  | 82  | 71  | 85  | 87  | 93  | 64  |
| 36 | 47 | 47  | 59  | 59  | 60  | 76  | 93  | 84  | 58  |
| 21 | 25 | 23  | 37  | 47  | 34  | 50  | 41  | 47  | 33  |
| 31 | 28 | 41  | 86  | 108 | 81  | 89  | 102 | 103 | 48  |
| 69 | 48 | 56  | 82  | 98  | 75  | 121 | 124 | 121 | 66  |
| 77 | 75 | 86  | 75  | 87  | 78  | 104 | 98  | 97  | 87  |
| 46 | 45 | 56  | 60  | 76  | 61  | 83  | 73  | 76  | 51  |
| 22 | 14 | 16  | 19  | 19  | 27  | 20  | 10  | 18  | 18  |
| 51 | 50 | 35  | 72  | 82  | 65  | 86  | 60  | 87  | 48  |
| 31 | 28 | 32  | 43  | 53  | 41  | 44  | 33  | 51  | 25  |
| 26 | 22 | 20  | 26  | 36  | 42  | 54  | 39  | 39  | 24  |
| 39 | 38 | 25  | 75  | 109 | 95  | 61  | 42  | 61  | 30  |
| 27 | 22 | 38  | 28  | 25  | 20  | 27  | 27  | 27  | 35  |
| 27 | 32 | 42  | 37  | 37  | 39  | 42  | 37  | 34  | 33  |
| 21 | 28 | 26  | 43  | 82  | 57  | 42  | 34  | 37  | 28  |
| 34 | 44 | 29  | 29  | 43  | 48  | 30  | 36  | 28  | 35  |
| 23 | 18 | 31  | 24  | 37  | 43  | 29  | 17  | 26  | 23  |
| 36 | 36 | 41  | 52  | 65  | 62  | 32  | 36  | 42  | 27  |
| 52 | 49 | 63  | 51  | 64  | 65  | 40  | 33  | 38  | 55  |

|     |     |     |     |     |     |     |     |     |     |
|-----|-----|-----|-----|-----|-----|-----|-----|-----|-----|
| 15  | 10  | 15  | 16  | 21  | 14  | 9   | 13  | 17  | 4   |
| 9   | 10  | 11  | 15  | 19  | 12  | 9   | 3   | 6   | 6   |
| 49  | 53  | 43  | 84  | 89  | 79  | 67  | 76  | 90  | 54  |
| 40  | 41  | 41  | 32  | 40  | 34  | 60  | 41  | 54  | 42  |
| 87  | 73  | 101 | 84  | 109 | 89  | 90  | 112 | 110 | 69  |
| 64  | 70  | 65  | 68  | 73  | 87  | 98  | 95  | 89  | 65  |
| 71  | 44  | 51  | 30  | 51  | 52  | 53  | 43  | 52  | 36  |
| 56  | 56  | 60  | 32  | 47  | 44  | 71  | 54  | 65  | 54  |
| 34  | 35  | 45  | 148 | 185 | 170 | 232 | 201 | 218 | 112 |
| 37  | 30  | 46  | 34  | 18  | 22  | 28  | 34  | 30  | 28  |
| 45  | 41  | 43  | 26  | 41  | 34  | 43  | 38  | 35  | 36  |
| 56  | 84  | 61  | 113 | 149 | 141 | 134 | 121 | 149 | 76  |
| 19  | 22  | 19  | 26  | 48  | 31  | 43  | 40  | 41  | 31  |
| 29  | 35  | 38  | 27  | 47  | 37  | 39  | 26  | 35  | 31  |
| 15  | 19  | 26  | 30  | 45  | 32  | 33  | 32  | 27  | 20  |
| 27  | 37  | 42  | 55  | 75  | 59  | 62  | 56  | 52  | 30  |
| 4   | 5   | 4   | 6   | 6   | 12  | 5   | 4   | 1   | 6   |
| 13  | 13  | 12  | 7   | 4   | 8   | 9   | 8   | 6   | 10  |
| 37  | 29  | 30  | 43  | 47  | 35  | 36  | 36  | 38  | 36  |
| 17  | 13  | 5   | 22  | 29  | 13  | 9   | 11  | 16  | 9   |
| 57  | 49  | 61  | 121 | 170 | 144 | 59  | 57  | 64  | 42  |
| 78  | 82  | 79  | 44  | 43  | 50  | 54  | 45  | 47  | 42  |
| 148 | 152 | 161 | 119 | 151 | 132 | 177 | 160 | 157 | 156 |
| 49  | 41  | 32  | 25  | 27  | 23  | 23  | 23  | 20  | 40  |
| 33  | 46  | 33  | 38  | 52  | 51  | 39  | 29  | 26  | 31  |
| 43  | 44  | 45  | 59  | 63  | 46  | 53  | 55  | 54  | 38  |
| 18  | 28  | 20  | 38  | 48  | 32  | 41  | 42  | 29  | 28  |
| 68  | 53  | 67  | 63  | 72  | 54  | 47  | 46  | 45  | 48  |
| 40  | 42  | 55  | 47  | 51  | 40  | 22  | 23  | 33  | 36  |
| 77  | 55  | 68  | 111 | 135 | 124 | 111 | 77  | 92  | 63  |
| 25  | 21  | 25  | 56  | 73  | 68  | 40  | 20  | 41  | 18  |
| 41  | 50  | 47  | 77  | 80  | 75  | 69  | 50  | 44  | 41  |
| 44  | 58  | 63  | 64  | 63  | 50  | 42  | 51  | 55  | 46  |
| 46  | 50  | 49  | 35  | 58  | 40  | 54  | 45  | 50  | 31  |
| 32  | 25  | 38  | 24  | 20  | 24  | 29  | 24  | 26  | 32  |
| 51  | 43  | 56  | 121 | 157 | 134 | 164 | 172 | 186 | 88  |
| 29  | 33  | 31  | 42  | 47  | 54  | 46  | 37  | 54  | 42  |
| 33  | 44  | 46  | 74  | 104 | 69  | 94  | 81  | 98  | 54  |
| 46  | 40  | 36  | 29  | 38  | 37  | 36  | 25  | 30  | 24  |
| 24  | 20  | 24  | 26  | 40  | 31  | 33  | 25  | 20  | 25  |
| 48  | 41  | 41  | 86  | 110 | 93  | 70  | 67  | 64  | 50  |

|     |     |     |     |     |     |     |     |     |     |
|-----|-----|-----|-----|-----|-----|-----|-----|-----|-----|
| 24  | 34  | 21  | 99  | 120 | 114 | 57  | 45  | 53  | 42  |
| 24  | 31  | 31  | 36  | 59  | 45  | 33  | 30  | 40  | 21  |
| 43  | 42  | 55  | 86  | 97  | 101 | 62  | 57  | 58  | 59  |
| 108 | 118 | 118 | 201 | 255 | 223 | 135 | 111 | 139 | 93  |
| 19  | 18  | 25  | 49  | 44  | 38  | 20  | 20  | 27  | 18  |
| 28  | 21  | 26  | 30  | 37  | 27  | 22  | 30  | 28  | 19  |
| 44  | 47  | 50  | 96  | 106 | 105 | 74  | 64  | 73  | 52  |
| 39  | 32  | 30  | 58  | 72  | 74  | 54  | 34  | 44  | 39  |
| 35  | 38  | 36  | 86  | 110 | 85  | 51  | 55  | 47  | 42  |
| 106 | 128 | 124 | 96  | 143 | 128 | 111 | 97  | 106 | 45  |
| 99  | 98  | 102 | 100 | 112 | 103 | 105 | 90  | 99  | 58  |
| 78  | 74  | 95  | 86  | 108 | 111 | 107 | 113 | 104 | 82  |
| 48  | 46  | 36  | 59  | 42  | 45  | 46  | 50  | 50  | 27  |
| 59  | 48  | 50  | 60  | 59  | 53  | 74  | 67  | 52  | 45  |
| 89  | 95  | 94  | 68  | 72  | 93  | 78  | 75  | 81  | 73  |
| 17  | 12  | 17  | 15  | 24  | 19  | 18  | 18  | 19  | 19  |
| 32  | 29  | 45  | 17  | 34  | 36  | 37  | 34  | 36  | 30  |
| 11  | 17  | 25  | 10  | 8   | 8   | 15  | 10  | 9   | 10  |
| 18  | 28  | 27  | 11  | 33  | 25  | 21  | 15  | 13  | 25  |
| 22  | 35  | 41  | 39  | 67  | 58  | 56  | 60  | 67  | 41  |
| 25  | 26  | 21  | 11  | 13  | 17  | 12  | 18  | 16  | 23  |
| 25  | 34  | 42  | 29  | 45  | 31  | 30  | 35  | 30  | 34  |
| 46  | 42  | 54  | 44  | 39  | 46  | 37  | 37  | 47  | 34  |
| 55  | 61  | 68  | 72  | 104 | 75  | 75  | 53  | 93  | 63  |
| 48  | 30  | 36  | 60  | 94  | 73  | 104 | 62  | 93  | 64  |
| 51  | 33  | 57  | 36  | 35  | 35  | 38  | 46  | 46  | 29  |
| 44  | 44  | 64  | 63  | 77  | 75  | 82  | 71  | 84  | 44  |
| 73  | 71  | 82  | 151 | 180 | 171 | 124 | 159 | 162 | 81  |
| 43  | 47  | 60  | 44  | 41  | 43  | 55  | 27  | 34  | 33  |
| 53  | 53  | 49  | 60  | 78  | 75  | 68  | 58  | 65  | 46  |
| 49  | 45  | 44  | 60  | 89  | 65  | 71  | 70  | 80  | 59  |
| 56  | 43  | 73  | 65  | 91  | 60  | 97  | 89  | 88  | 62  |
| 9   | 4   | 8   | 19  | 25  | 14  | 8   | 8   | 7   | 7   |
| 21  | 23  | 33  | 31  | 43  | 35  | 47  | 39  | 37  | 33  |
| 35  | 29  | 40  | 36  | 38  | 35  | 39  | 23  | 42  | 35  |
| 36  | 29  | 26  | 46  | 38  | 38  | 32  | 39  | 27  | 23  |
| 134 | 110 | 150 | 137 | 154 | 176 | 227 | 235 | 231 | 129 |
| 65  | 48  | 52  | 97  | 121 | 106 | 101 | 82  | 81  | 52  |
| 36  | 26  | 23  | 26  | 34  | 36  | 25  | 30  | 29  | 20  |
| 32  | 35  | 42  | 247 | 319 | 241 | 228 | 207 | 217 | 96  |
| 28  | 29  | 37  | 134 | 159 | 169 | 104 | 83  | 102 | 63  |

|    |    |    |     |     |     |     |     |     |     |
|----|----|----|-----|-----|-----|-----|-----|-----|-----|
| 46 | 48 | 38 | 126 | 149 | 135 | 176 | 156 | 170 | 81  |
| 38 | 28 | 43 | 212 | 252 | 198 | 252 | 249 | 243 | 83  |
| 38 | 35 | 35 | 164 | 198 | 174 | 247 | 172 | 240 | 98  |
| 67 | 51 | 56 | 240 | 348 | 303 | 244 | 240 | 212 | 113 |
| 20 | 27 | 32 | 123 | 128 | 135 | 67  | 94  | 73  | 54  |
| 48 | 44 | 48 | 156 | 200 | 179 | 178 | 163 | 168 | 87  |
| 50 | 55 | 51 | 131 | 179 | 177 | 154 | 147 | 164 | 70  |
| 30 | 17 | 20 | 97  | 119 | 94  | 135 | 123 | 134 | 64  |
| 24 | 39 | 40 | 162 | 180 | 178 | 163 | 163 | 180 | 72  |
| 28 | 29 | 30 | 20  | 21  | 25  | 22  | 16  | 13  | 32  |
| 30 | 28 | 35 | 12  | 20  | 10  | 21  | 22  | 24  | 26  |
| 59 | 48 | 62 | 91  | 106 | 92  | 136 | 100 | 100 | 59  |
| 26 | 29 | 38 | 21  | 37  | 17  | 64  | 51  | 55  | 25  |
| 33 | 39 | 33 | 55  | 62  | 64  | 67  | 44  | 63  | 31  |
| 40 | 48 | 49 | 45  | 68  | 55  | 53  | 60  | 40  | 47  |
| 27 | 23 | 27 | 70  | 81  | 75  | 82  | 80  | 89  | 34  |
| 36 | 34 | 45 | 90  | 101 | 85  | 74  | 62  | 72  | 33  |
| 64 | 62 | 60 | 99  | 119 | 104 | 118 | 104 | 120 | 89  |
| 52 | 55 | 57 | 109 | 105 | 95  | 113 | 96  | 126 | 63  |
| 41 | 29 | 33 | 83  | 115 | 124 | 110 | 91  | 98  | 64  |
| 70 | 66 | 77 | 60  | 73  | 71  | 52  | 64  | 72  | 67  |
| 64 | 56 | 68 | 103 | 145 | 132 | 164 | 158 | 171 | 85  |
| 41 | 48 | 45 | 78  | 86  | 89  | 73  | 80  | 69  | 52  |
| 29 | 21 | 36 | 26  | 34  | 25  | 36  | 23  | 34  | 23  |
| 41 | 53 | 45 | 112 | 155 | 144 | 135 | 107 | 128 | 48  |
| 41 | 45 | 54 | 72  | 68  | 79  | 81  | 85  | 96  | 43  |
| 37 | 47 | 50 | 86  | 96  | 79  | 96  | 93  | 98  | 47  |
| 46 | 49 | 53 | 65  | 96  | 76  | 116 | 89  | 97  | 63  |
| 56 | 46 | 54 | 84  | 97  | 93  | 93  | 53  | 66  | 49  |
| 50 | 42 | 58 | 88  | 103 | 88  | 87  | 67  | 77  | 54  |
| 45 | 57 | 51 | 66  | 83  | 74  | 72  | 83  | 100 | 52  |
| 39 | 51 | 43 | 48  | 62  | 65  | 64  | 38  | 57  | 49  |
| 24 | 22 | 41 | 22  | 24  | 32  | 45  | 33  | 30  | 24  |
| 32 | 46 | 51 | 38  | 57  | 65  | 58  | 64  | 58  | 30  |
| 42 | 38 | 34 | 32  | 48  | 36  | 38  | 23  | 39  | 33  |
| 43 | 41 | 38 | 42  | 67  | 48  | 44  | 38  | 48  | 30  |
| 3  | 7  | 1  | 13  | 7   | 8   | 10  | 5   | 5   | 2   |
| 24 | 27 | 23 | 35  | 35  | 41  | 35  | 35  | 39  | 27  |
| 28 | 34 | 41 | 16  | 26  | 25  | 21  | 26  | 27  | 31  |
| 25 | 25 | 18 | 15  | 19  | 20  | 19  | 20  | 22  | 19  |
| 24 | 23 | 31 | 60  | 61  | 40  | 26  | 23  | 29  | 20  |



|    |    |    |     |     |     |     |     |     |     |
|----|----|----|-----|-----|-----|-----|-----|-----|-----|
| 15 | 18 | 27 | 25  | 43  | 32  | 31  | 27  | 20  | 17  |
| 27 | 28 | 41 | 46  | 61  | 43  | 42  | 38  | 37  | 29  |
| 28 | 27 | 35 | 35  | 36  | 29  | 17  | 23  | 25  | 23  |
| 24 | 33 | 25 | 40  | 57  | 44  | 36  | 35  | 22  | 19  |
| 31 | 30 | 30 | 107 | 134 | 95  | 123 | 96  | 101 | 47  |
| 26 | 36 | 34 | 48  | 41  | 46  | 30  | 31  | 35  | 20  |
| 82 | 80 | 96 | 374 | 469 | 306 | 445 | 432 | 438 | 166 |
| 50 | 60 | 55 | 41  | 54  | 65  | 60  | 71  | 63  | 44  |
| 66 | 72 | 88 | 53  | 63  | 55  | 67  | 64  | 73  | 80  |
| 53 | 66 | 85 | 48  | 69  | 57  | 61  | 63  | 74  | 42  |
| 14 | 11 | 23 | 10  | 12  | 6   | 25  | 6   | 15  | 13  |
| 69 | 62 | 76 | 46  | 47  | 31  | 47  | 44  | 59  | 48  |
| 65 | 59 | 69 | 56  | 99  | 79  | 125 | 116 | 115 | 62  |
| 40 | 40 | 57 | 55  | 57  | 60  | 64  | 67  | 75  | 52  |
| 16 | 38 | 28 | 35  | 36  | 38  | 46  | 47  | 45  | 32  |
| 32 | 32 | 45 | 35  | 40  | 58  | 58  | 70  | 71  | 51  |
| 51 | 40 | 57 | 87  | 103 | 113 | 81  | 76  | 97  | 56  |
| 73 | 63 | 72 | 52  | 47  | 54  | 36  | 32  | 52  | 55  |
| 81 | 77 | 87 | 120 | 168 | 135 | 121 | 129 | 126 | 99  |
| 75 | 78 | 75 | 114 | 177 | 154 | 124 | 144 | 151 | 64  |
| 37 | 50 | 52 | 122 | 139 | 134 | 127 | 119 | 119 | 73  |
| 18 | 14 | 19 | 32  | 29  | 35  | 18  | 10  | 16  | 17  |
| 29 | 32 | 48 | 31  | 46  | 37  | 40  | 31  | 33  | 43  |
| 51 | 42 | 42 | 61  | 105 | 71  | 56  | 50  | 57  | 41  |
| 44 | 55 | 53 | 80  | 105 | 95  | 89  | 88  | 109 | 58  |
| 40 | 43 | 45 | 92  | 125 | 91  | 81  | 80  | 74  | 56  |
| 24 | 31 | 25 | 43  | 66  | 59  | 64  | 73  | 71  | 29  |
| 32 | 34 | 35 | 19  | 27  | 25  | 18  | 27  | 43  | 30  |
| 38 | 36 | 51 | 39  | 56  | 47  | 47  | 33  | 47  | 41  |
| 42 | 51 | 50 | 52  | 57  | 65  | 60  | 42  | 61  | 63  |
| 45 | 47 | 68 | 68  | 109 | 94  | 118 | 116 | 142 | 67  |
| 33 | 41 | 42 | 39  | 35  | 31  | 61  | 61  | 47  | 39  |
| 42 | 60 | 51 | 75  | 92  | 82  | 100 | 83  | 85  | 62  |
| 32 | 29 | 29 | 29  | 34  | 32  | 31  | 30  | 27  | 33  |
| 41 | 49 | 45 | 38  | 40  | 38  | 38  | 39  | 50  | 36  |
| 40 | 45 | 35 | 68  | 72  | 79  | 87  | 64  | 67  | 40  |
| 38 | 32 | 33 | 41  | 87  | 48  | 28  | 33  | 47  | 37  |
| 28 | 24 | 28 | 36  | 41  | 50  | 45  | 36  | 37  | 41  |
| 14 | 9  | 11 | 22  | 34  | 24  | 22  | 22  | 15  | 20  |
| 48 | 58 | 55 | 35  | 47  | 43  | 37  | 37  | 38  | 33  |
| 29 | 30 | 26 | 26  | 41  | 43  | 34  | 33  | 34  | 33  |

|     |     |    |     |     |     |     |     |     |     |
|-----|-----|----|-----|-----|-----|-----|-----|-----|-----|
| 22  | 17  | 19 | 17  | 16  | 8   | 18  | 18  | 16  | 19  |
| 117 | 112 | 97 | 151 | 197 | 181 | 154 | 131 | 143 | 106 |
| 69  | 66  | 64 | 188 | 202 | 185 | 206 | 184 | 224 | 92  |
| 51  | 40  | 44 | 74  | 98  | 98  | 66  | 58  | 71  | 41  |
| 47  | 60  | 54 | 68  | 90  | 90  | 72  | 62  | 72  | 61  |
| 66  | 83  | 64 | 112 | 132 | 147 | 102 | 102 | 124 | 72  |
| 60  | 76  | 55 | 115 | 169 | 170 | 118 | 83  | 125 | 73  |
| 55  | 47  | 62 | 92  | 114 | 104 | 87  | 77  | 75  | 57  |
| 15  | 15  | 19 | 53  | 71  | 47  | 24  | 18  | 20  | 23  |
| 42  | 36  | 57 | 93  | 93  | 67  | 66  | 46  | 54  | 55  |
| 71  | 65  | 63 | 160 | 207 | 176 | 193 | 144 | 170 | 83  |
| 53  | 61  | 61 | 158 | 187 | 140 | 117 | 94  | 93  | 59  |
| 19  | 18  | 18 | 17  | 11  | 16  | 11  | 15  | 7   | 18  |
| 23  | 23  | 26 | 29  | 34  | 35  | 39  | 28  | 28  | 25  |
| 48  | 37  | 33 | 45  | 60  | 64  | 53  | 28  | 51  | 30  |
| 26  | 28  | 33 | 46  | 39  | 40  | 28  | 24  | 37  | 31  |
| 24  | 24  | 22 | 5   | 9   | 10  | 9   | 8   | 8   | 20  |
| 22  | 15  | 20 | 5   | 11  | 15  | 13  | 15  | 16  | 20  |
| 36  | 41  | 39 | 17  | 17  | 13  | 14  | 15  | 16  | 24  |
| 23  | 23  | 20 | 19  | 28  | 29  | 14  | 16  | 12  | 17  |
| 19  | 13  | 9  | 2   | 5   | 6   | 5   | 5   | 12  | 6   |
| 20  | 21  | 30 | 19  | 23  | 21  | 23  | 11  | 20  | 22  |
| 22  | 27  | 28 | 26  | 36  | 33  | 31  | 25  | 26  | 23  |
| 25  | 18  | 17 | 9   | 16  | 11  | 14  | 9   | 18  | 17  |
| 14  | 21  | 24 | 3   | 8   | 1   | 14  | 7   | 8   | 7   |
| 13  | 22  | 18 | 18  | 18  | 18  | 10  | 10  | 11  | 11  |
| 43  | 30  | 42 | 33  | 68  | 62  | 52  | 51  | 46  | 38  |
| 40  | 40  | 33 | 32  | 24  | 32  | 36  | 31  | 29  | 27  |
| 20  | 31  | 20 | 13  | 14  | 17  | 15  | 15  | 16  | 20  |
| 38  | 59  | 74 | 48  | 37  | 34  | 41  | 40  | 48  | 45  |
| 40  | 42  | 38 | 66  | 85  | 64  | 84  | 57  | 63  | 44  |
| 43  | 61  | 59 | 62  | 71  | 86  | 75  | 72  | 76  | 49  |
| 42  | 35  | 33 | 39  | 40  | 36  | 31  | 25  | 31  | 27  |
| 44  | 43  | 53 | 56  | 88  | 68  | 48  | 46  | 51  | 34  |
| 14  | 16  | 16 | 14  | 12  | 9   | 16  | 12  | 10  | 15  |
| 42  | 38  | 50 | 77  | 64  | 62  | 45  | 32  | 56  | 39  |
| 40  | 43  | 44 | 43  | 58  | 48  | 33  | 27  | 32  | 36  |
| 39  | 42  | 36 | 104 | 157 | 116 | 79  | 66  | 75  | 41  |
| 41  | 36  | 41 | 84  | 90  | 74  | 69  | 58  | 62  | 39  |
| 73  | 77  | 88 | 85  | 125 | 104 | 83  | 78  | 89  | 85  |
| 30  | 35  | 32 | 39  | 49  | 35  | 45  | 27  | 22  | 33  |

|     |     |     |     |     |     |     |     |     |     |
|-----|-----|-----|-----|-----|-----|-----|-----|-----|-----|
| 45  | 48  | 37  | 29  | 50  | 48  | 23  | 33  | 23  | 35  |
| 36  | 41  | 55  | 59  | 89  | 96  | 64  | 49  | 55  | 41  |
| 42  | 43  | 41  | 115 | 128 | 108 | 112 | 106 | 120 | 60  |
| 37  | 32  | 37  | 57  | 79  | 66  | 40  | 44  | 41  | 42  |
| 15  | 37  | 30  | 30  | 43  | 38  | 29  | 34  | 40  | 28  |
| 35  | 37  | 36  | 62  | 82  | 74  | 48  | 46  | 59  | 51  |
| 56  | 49  | 54  | 82  | 130 | 107 | 58  | 61  | 55  | 52  |
| 20  | 20  | 30  | 278 | 345 | 252 | 204 | 156 | 204 | 80  |
| 39  | 45  | 37  | 52  | 61  | 55  | 34  | 68  | 55  | 35  |
| 78  | 68  | 73  | 102 | 145 | 127 | 117 | 130 | 136 | 76  |
| 118 | 125 | 114 | 207 | 279 | 260 | 276 | 243 | 280 | 149 |
| 59  | 40  | 49  | 36  | 53  | 50  | 73  | 50  | 61  | 53  |
| 13  | 15  | 26  | 19  | 21  | 23  | 22  | 15  | 15  | 18  |
| 32  | 41  | 39  | 47  | 59  | 50  | 35  | 33  | 53  | 38  |
| 26  | 27  | 43  | 61  | 78  | 68  | 47  | 50  | 42  | 37  |
| 41  | 47  | 44  | 76  | 65  | 75  | 63  | 56  | 46  | 50  |
| 31  | 32  | 35  | 78  | 94  | 103 | 48  | 51  | 58  | 37  |
| 53  | 59  | 65  | 152 | 179 | 152 | 90  | 80  | 91  | 60  |
| 45  | 34  | 35  | 60  | 94  | 98  | 58  | 42  | 57  | 43  |
| 44  | 36  | 43  | 84  | 106 | 85  | 49  | 49  | 54  | 47  |
| 27  | 33  | 38  | 54  | 51  | 49  | 43  | 31  | 35  | 37  |
| 30  | 37  | 17  | 11  | 18  | 18  | 19  | 10  | 18  | 24  |
| 36  | 20  | 33  | 55  | 83  | 78  | 65  | 37  | 59  | 31  |
| 28  | 20  | 23  | 22  | 20  | 22  | 28  | 24  | 25  | 18  |
| 17  | 20  | 27  | 56  | 82  | 68  | 45  | 48  | 41  | 29  |
| 20  | 25  | 26  | 84  | 84  | 74  | 53  | 53  | 50  | 27  |
| 39  | 39  | 53  | 47  | 61  | 38  | 42  | 25  | 45  | 34  |
| 25  | 24  | 28  | 36  | 35  | 31  | 30  | 40  | 28  | 17  |
| 42  | 44  | 65  | 132 | 150 | 128 | 124 | 147 | 138 | 74  |
| 43  | 52  | 58  | 42  | 52  | 51  | 58  | 53  | 40  | 43  |
| 23  | 25  | 30  | 151 | 182 | 191 | 97  | 99  | 110 | 43  |
| 20  | 28  | 26  | 29  | 44  | 27  | 23  | 21  | 21  | 17  |
| 28  | 23  | 35  | 29  | 36  | 26  | 29  | 21  | 26  | 28  |
| 42  | 40  | 48  | 89  | 130 | 95  | 111 | 97  | 91  | 57  |
| 37  | 27  | 38  | 25  | 29  | 36  | 37  | 32  | 29  | 39  |
| 22  | 38  | 29  | 8   | 17  | 22  | 13  | 21  | 14  | 16  |
| 31  | 24  | 36  | 11  | 10  | 14  | 13  | 15  | 14  | 15  |
| 34  | 27  | 29  | 11  | 13  | 12  | 23  | 17  | 28  | 27  |
| 20  | 28  | 26  | 12  | 12  | 14  | 16  | 15  | 16  | 16  |
| 49  | 63  | 51  | 23  | 34  | 32  | 30  | 36  | 47  | 45  |
| 56  | 45  | 66  | 107 | 120 | 108 | 102 | 74  | 109 | 71  |

|    |    |     |     |     |     |     |     |     |     |
|----|----|-----|-----|-----|-----|-----|-----|-----|-----|
| 17 | 23 | 20  | 32  | 36  | 26  | 11  | 14  | 12  | 18  |
| 26 | 29 | 30  | 36  | 34  | 40  | 36  | 39  | 33  | 22  |
| 63 | 53 | 67  | 129 | 199 | 158 | 171 | 177 | 192 | 81  |
| 36 | 36 | 35  | 12  | 17  | 13  | 18  | 19  | 23  | 27  |
| 55 | 61 | 49  | 53  | 76  | 62  | 71  | 77  | 64  | 55  |
| 16 | 12 | 8   | 9   | 16  | 6   | 12  | 2   | 9   | 9   |
| 11 | 12 | 15  | 20  | 25  | 19  | 16  | 9   | 13  | 14  |
| 21 | 15 | 26  | 22  | 38  | 27  | 28  | 17  | 37  | 19  |
| 26 | 34 | 40  | 30  | 38  | 43  | 16  | 22  | 18  | 34  |
| 55 | 35 | 55  | 36  | 25  | 24  | 32  | 39  | 28  | 27  |
| 11 | 26 | 15  | 6   | 13  | 14  | 11  | 11  | 13  | 12  |
| 37 | 35 | 42  | 30  | 46  | 24  | 29  | 23  | 29  | 29  |
| 37 | 36 | 36  | 45  | 38  | 49  | 45  | 30  | 51  | 42  |
| 33 | 28 | 39  | 63  | 78  | 66  | 77  | 68  | 58  | 40  |
| 24 | 37 | 27  | 26  | 27  | 35  | 38  | 36  | 38  | 40  |
| 28 | 27 | 35  | 54  | 44  | 59  | 57  | 46  | 52  | 38  |
| 41 | 49 | 44  | 52  | 80  | 56  | 59  | 54  | 71  | 48  |
| 79 | 86 | 85  | 119 | 141 | 118 | 176 | 170 | 162 | 108 |
| 37 | 40 | 42  | 35  | 47  | 34  | 34  | 15  | 31  | 29  |
| 29 | 28 | 20  | 35  | 38  | 41  | 32  | 18  | 36  | 23  |
| 55 | 52 | 54  | 69  | 97  | 86  | 106 | 81  | 98  | 56  |
| 39 | 33 | 34  | 81  | 112 | 81  | 87  | 85  | 84  | 48  |
| 28 | 17 | 20  | 34  | 36  | 20  | 33  | 21  | 28  | 19  |
| 54 | 57 | 65  | 87  | 115 | 100 | 134 | 88  | 112 | 66  |
| 92 | 72 | 100 | 89  | 106 | 95  | 68  | 81  | 84  | 74  |
| 41 | 63 | 75  | 86  | 111 | 97  | 61  | 56  | 56  | 66  |
| 40 | 47 | 58  | 48  | 49  | 54  | 49  | 41  | 56  | 40  |
| 35 | 48 | 54  | 87  | 96  | 91  | 71  | 64  | 89  | 48  |
| 47 | 35 | 35  | 36  | 38  | 34  | 26  | 35  | 24  | 25  |
| 69 | 51 | 66  | 76  | 100 | 90  | 67  | 46  | 60  | 51  |
| 79 | 99 | 103 | 89  | 92  | 75  | 92  | 83  | 88  | 82  |
| 41 | 54 | 56  | 108 | 130 | 137 | 90  | 77  | 84  | 60  |
| 10 | 17 | 12  | 14  | 19  | 6   | 13  | 2   | 10  | 6   |
| 25 | 17 | 11  | 26  | 51  | 30  | 14  | 16  | 22  | 15  |
| 15 | 15 | 20  | 25  | 32  | 23  | 16  | 11  | 25  | 15  |
| 12 | 14 | 16  | 41  | 35  | 32  | 18  | 21  | 23  | 16  |
| 42 | 39 | 43  | 25  | 36  | 29  | 32  | 20  | 28  | 35  |
| 37 | 42 | 37  | 56  | 43  | 40  | 27  | 29  | 37  | 42  |
| 13 | 14 | 25  | 32  | 31  | 35  | 23  | 15  | 24  | 14  |
| 13 | 17 | 11  | 21  | 28  | 26  | 15  | 24  | 18  | 19  |
| 36 | 48 | 40  | 50  | 37  | 29  | 35  | 26  | 20  | 41  |

|    |     |    |     |     |     |     |     |     |    |
|----|-----|----|-----|-----|-----|-----|-----|-----|----|
| 51 | 49  | 41 | 44  | 43  | 33  | 44  | 31  | 34  | 36 |
| 20 | 22  | 22 | 15  | 10  | 12  | 8   | 12  | 8   | 11 |
| 10 | 13  | 7  | 12  | 10  | 19  | 13  | 7   | 7   | 11 |
| 7  | 9   | 10 | 10  | 9   | 8   | 5   | 8   | 7   | 8  |
| 19 | 18  | 17 | 23  | 19  | 23  | 27  | 12  | 32  | 17 |
| 96 | 123 | 98 | 108 | 127 | 115 | 104 | 107 | 89  | 87 |
| 23 | 19  | 31 | 16  | 16  | 19  | 16  | 18  | 21  | 13 |
| 14 | 8   | 17 | 5   | 7   | 9   | 4   | 3   | 12  | 9  |
| 14 | 19  | 23 | 16  | 24  | 23  | 14  | 15  | 21  | 11 |
| 39 | 34  | 43 | 41  | 46  | 40  | 46  | 39  | 42  | 28 |
| 18 | 14  | 19 | 11  | 17  | 18  | 20  | 17  | 16  | 15 |
| 31 | 35  | 35 | 44  | 57  | 41  | 31  | 28  | 22  | 26 |
| 41 | 28  | 52 | 66  | 51  | 41  | 27  | 30  | 28  | 28 |
| 39 | 35  | 40 | 77  | 73  | 67  | 37  | 41  | 33  | 37 |
| 84 | 65  | 76 | 49  | 64  | 53  | 69  | 76  | 81  | 66 |
| 52 | 50  | 53 | 106 | 158 | 134 | 144 | 117 | 120 | 60 |
| 49 | 55  | 49 | 43  | 65  | 64  | 48  | 41  | 60  | 38 |
| 28 | 48  | 44 | 46  | 76  | 46  | 53  | 51  | 47  | 33 |
| 7  | 16  | 23 | 38  | 38  | 29  | 17  | 27  | 19  | 16 |
| 10 | 13  | 13 | 36  | 33  | 30  | 23  | 10  | 24  | 13 |
| 27 | 42  | 44 | 83  | 88  | 80  | 68  | 39  | 57  | 42 |
| 22 | 31  | 46 | 46  | 52  | 56  | 35  | 40  | 48  | 38 |
| 52 | 50  | 55 | 102 | 108 | 128 | 117 | 104 | 117 | 79 |
| 7  | 11  | 9  | 42  | 53  | 40  | 40  | 23  | 29  | 15 |
| 66 | 39  | 80 | 152 | 197 | 176 | 197 | 163 | 167 | 83 |
| 34 | 45  | 55 | 80  | 99  | 80  | 97  | 70  | 84  | 40 |
| 43 | 68  | 56 | 114 | 154 | 129 | 102 | 82  | 115 | 58 |
| 29 | 32  | 35 | 89  | 138 | 97  | 141 | 143 | 141 | 52 |
| 55 | 57  | 50 | 107 | 153 | 140 | 140 | 113 | 136 | 78 |
| 48 | 44  | 54 | 74  | 109 | 100 | 130 | 81  | 89  | 55 |
| 55 | 33  | 36 | 76  | 114 | 99  | 97  | 88  | 97  | 36 |
| 45 | 44  | 44 | 83  | 92  | 91  | 91  | 86  | 79  | 52 |
| 46 | 57  | 48 | 66  | 75  | 54  | 98  | 109 | 110 | 49 |
| 15 | 9   | 12 | 13  | 22  | 11  | 17  | 10  | 12  | 16 |
| 38 | 44  | 43 | 51  | 81  | 77  | 73  | 68  | 88  | 53 |
| 16 | 11  | 14 | 18  | 17  | 24  | 15  | 14  | 16  | 16 |
| 34 | 37  | 31 | 27  | 36  | 33  | 25  | 29  | 24  | 20 |
| 74 | 86  | 84 | 80  | 111 | 75  | 105 | 82  | 89  | 63 |
| 37 | 35  | 27 | 46  | 68  | 59  | 40  | 32  | 45  | 26 |
| 29 | 32  | 40 | 34  | 64  | 39  | 31  | 33  | 31  | 26 |
| 34 | 33  | 41 | 54  | 84  | 59  | 76  | 66  | 55  | 52 |

|     |    |     |     |     |     |     |     |     |     |
|-----|----|-----|-----|-----|-----|-----|-----|-----|-----|
| 28  | 26 | 34  | 35  | 43  | 36  | 39  | 22  | 20  | 27  |
| 23  | 18 | 24  | 42  | 52  | 33  | 41  | 43  | 40  | 29  |
| 68  | 50 | 46  | 55  | 72  | 67  | 44  | 39  | 63  | 46  |
| 46  | 65 | 66  | 51  | 70  | 64  | 59  | 56  | 57  | 43  |
| 34  | 50 | 54  | 69  | 63  | 66  | 80  | 59  | 67  | 34  |
| 39  | 29 | 26  | 20  | 26  | 25  | 28  | 17  | 15  | 26  |
| 37  | 40 | 37  | 30  | 44  | 41  | 56  | 66  | 74  | 56  |
| 37  | 56 | 39  | 63  | 73  | 62  | 62  | 54  | 58  | 52  |
| 68  | 74 | 86  | 126 | 154 | 139 | 122 | 139 | 133 | 78  |
| 38  | 30 | 45  | 64  | 66  | 60  | 42  | 51  | 51  | 39  |
| 20  | 13 | 17  | 55  | 76  | 71  | 50  | 36  | 50  | 25  |
| 27  | 34 | 37  | 45  | 54  | 43  | 51  | 41  | 39  | 25  |
| 16  | 14 | 17  | 33  | 29  | 19  | 21  | 16  | 14  | 13  |
| 20  | 8  | 12  | 24  | 33  | 26  | 19  | 27  | 24  | 17  |
| 12  | 6  | 12  | 17  | 31  | 25  | 23  | 30  | 20  | 13  |
| 22  | 40 | 30  | 94  | 143 | 133 | 46  | 46  | 56  | 33  |
| 17  | 11 | 8   | 17  | 33  | 36  | 18  | 23  | 24  | 9   |
| 37  | 39 | 38  | 81  | 126 | 99  | 85  | 85  | 71  | 42  |
| 82  | 75 | 80  | 67  | 87  | 82  | 86  | 79  | 87  | 50  |
| 68  | 52 | 60  | 56  | 79  | 68  | 78  | 57  | 92  | 54  |
| 48  | 53 | 51  | 108 | 140 | 158 | 151 | 135 | 143 | 72  |
| 51  | 64 | 48  | 57  | 61  | 63  | 76  | 86  | 83  | 50  |
| 88  | 99 | 120 | 190 | 249 | 194 | 282 | 255 | 327 | 159 |
| 13  | 6  | 7   | 3   | 4   | 9   | 7   | 3   | 4   | 5   |
| 22  | 11 | 16  | 20  | 40  | 19  | 13  | 17  | 8   | 20  |
| 25  | 32 | 25  | 28  | 43  | 42  | 35  | 34  | 37  | 31  |
| 33  | 31 | 47  | 25  | 36  | 31  | 32  | 34  | 28  | 32  |
| 62  | 79 | 60  | 70  | 96  | 79  | 99  | 95  | 108 | 59  |
| 89  | 81 | 84  | 65  | 98  | 56  | 98  | 81  | 88  | 72  |
| 31  | 24 | 26  | 134 | 180 | 152 | 145 | 116 | 154 | 69  |
| 36  | 34 | 49  | 486 | 547 | 474 | 520 | 513 | 513 | 233 |
| 33  | 36 | 39  | 313 | 368 | 316 | 335 | 299 | 333 | 182 |
| 45  | 46 | 45  | 98  | 156 | 122 | 114 | 113 | 102 | 59  |
| 72  | 61 | 71  | 219 | 269 | 250 | 267 | 231 | 241 | 115 |
| 24  | 24 | 23  | 101 | 158 | 128 | 89  | 105 | 100 | 52  |
| 45  | 52 | 57  | 156 | 200 | 171 | 249 | 186 | 232 | 117 |
| 100 | 78 | 98  | 439 | 642 | 607 | 648 | 526 | 607 | 336 |
| 50  | 41 | 46  | 251 | 340 | 309 | 164 | 153 | 199 | 111 |
| 68  | 51 | 63  | 310 | 367 | 313 | 389 | 337 | 324 | 150 |
| 24  | 27 | 28  | 21  | 34  | 30  | 17  | 19  | 17  | 21  |
| 2   | 1  | 5   | 1   | 1   | 2   | 0   | 1   | 1   | 3   |

|     |     |     |     |     |     |     |     |     |     |
|-----|-----|-----|-----|-----|-----|-----|-----|-----|-----|
| 22  | 23  | 25  | 131 | 144 | 120 | 70  | 64  | 76  | 34  |
| 32  | 28  | 45  | 237 | 412 | 262 | 202 | 148 | 196 | 69  |
| 24  | 18  | 48  | 123 | 166 | 123 | 101 | 85  | 98  | 61  |
| 15  | 23  | 21  | 95  | 135 | 103 | 106 | 108 | 99  | 44  |
| 44  | 41  | 55  | 78  | 114 | 73  | 98  | 84  | 86  | 54  |
| 49  | 50  | 53  | 416 | 544 | 466 | 585 | 540 | 603 | 292 |
| 49  | 55  | 59  | 315 | 406 | 342 | 389 | 367 | 400 | 184 |
| 30  | 22  | 34  | 198 | 246 | 217 | 166 | 136 | 165 | 63  |
| 46  | 47  | 52  | 71  | 87  | 54  | 54  | 49  | 54  | 43  |
| 24  | 34  | 31  | 25  | 33  | 28  | 20  | 24  | 31  | 31  |
| 22  | 38  | 41  | 60  | 82  | 67  | 54  | 55  | 50  | 26  |
| 21  | 18  | 21  | 35  | 53  | 57  | 54  | 31  | 41  | 32  |
| 23  | 19  | 31  | 47  | 57  | 71  | 42  | 50  | 46  | 16  |
| 11  | 12  | 12  | 31  | 35  | 27  | 17  | 19  | 12  | 11  |
| 30  | 46  | 50  | 49  | 97  | 76  | 68  | 57  | 67  | 45  |
| 26  | 29  | 32  | 60  | 82  | 75  | 69  | 54  | 70  | 29  |
| 14  | 11  | 21  | 37  | 54  | 47  | 37  | 30  | 30  | 16  |
| 18  | 27  | 36  | 40  | 91  | 69  | 54  | 49  | 62  | 28  |
| 34  | 23  | 31  | 226 | 309 | 222 | 164 | 152 | 180 | 82  |
| 43  | 63  | 52  | 237 | 286 | 271 | 156 | 142 | 144 | 76  |
| 78  | 104 | 100 | 31  | 46  | 43  | 43  | 35  | 37  | 38  |
| 124 | 130 | 123 | 87  | 112 | 81  | 98  | 99  | 117 | 91  |
| 57  | 51  | 57  | 28  | 39  | 41  | 38  | 30  | 50  | 27  |
| 35  | 43  | 29  | 12  | 13  | 10  | 12  | 9   | 10  | 13  |
| 44  | 28  | 57  | 19  | 45  | 31  | 49  | 31  | 31  | 19  |
| 34  | 47  | 35  | 57  | 71  | 77  | 38  | 39  | 57  | 46  |
| 88  | 68  | 94  | 118 | 185 | 152 | 95  | 89  | 92  | 66  |
| 57  | 69  | 77  | 345 | 427 | 400 | 583 | 516 | 540 | 264 |
| 69  | 60  | 79  | 50  | 87  | 61  | 61  | 59  | 85  | 71  |
| 37  | 32  | 45  | 70  | 131 | 103 | 87  | 63  | 71  | 59  |
| 26  | 26  | 21  | 36  | 55  | 36  | 37  | 21  | 35  | 28  |
| 33  | 22  | 28  | 37  | 44  | 37  | 23  | 26  | 36  | 22  |
| 53  | 55  | 47  | 132 | 189 | 161 | 149 | 132 | 129 | 83  |
| 30  | 31  | 24  | 107 | 163 | 103 | 128 | 122 | 132 | 55  |
| 49  | 49  | 42  | 99  | 103 | 109 | 100 | 93  | 112 | 60  |
| 25  | 35  | 13  | 107 | 93  | 116 | 71  | 46  | 55  | 39  |
| 52  | 60  | 68  | 260 | 367 | 311 | 302 | 249 | 256 | 136 |
| 80  | 87  | 81  | 176 | 223 | 174 | 216 | 201 | 198 | 123 |
| 86  | 77  | 76  | 145 | 218 | 162 | 180 | 166 | 183 | 107 |
| 45  | 29  | 46  | 23  | 28  | 21  | 25  | 25  | 37  | 21  |
| 34  | 36  | 40  | 150 | 183 | 174 | 130 | 129 | 124 | 62  |

|     |     |     |     |     |     |     |     |     |     |
|-----|-----|-----|-----|-----|-----|-----|-----|-----|-----|
| 33  | 34  | 38  | 347 | 432 | 344 | 316 | 244 | 311 | 121 |
| 24  | 42  | 36  | 58  | 86  | 64  | 58  | 41  | 44  | 32  |
| 38  | 29  | 32  | 209 | 268 | 230 | 170 | 168 | 168 | 64  |
| 39  | 46  | 34  | 77  | 98  | 85  | 81  | 99  | 82  | 52  |
| 41  | 34  | 40  | 236 | 261 | 248 | 245 | 200 | 212 | 108 |
| 50  | 68  | 64  | 141 | 169 | 176 | 190 | 177 | 188 | 98  |
| 58  | 60  | 60  | 135 | 196 | 179 | 192 | 181 | 201 | 76  |
| 39  | 37  | 39  | 138 | 178 | 153 | 195 | 160 | 171 | 80  |
| 17  | 35  | 29  | 91  | 120 | 124 | 109 | 81  | 110 | 61  |
| 34  | 20  | 29  | 89  | 170 | 109 | 138 | 114 | 114 | 72  |
| 62  | 63  | 71  | 267 | 331 | 303 | 396 | 418 | 418 | 175 |
| 35  | 31  | 41  | 61  | 103 | 78  | 100 | 86  | 107 | 53  |
| 30  | 23  | 30  | 110 | 138 | 117 | 111 | 114 | 110 | 52  |
| 35  | 29  | 53  | 53  | 77  | 75  | 92  | 59  | 73  | 45  |
| 43  | 48  | 40  | 67  | 59  | 47  | 73  | 61  | 57  | 42  |
| 36  | 65  | 43  | 71  | 74  | 61  | 81  | 59  | 67  | 45  |
| 28  | 30  | 37  | 25  | 42  | 34  | 35  | 38  | 43  | 28  |
| 20  | 20  | 30  | 21  | 17  | 17  | 18  | 15  | 20  | 19  |
| 50  | 39  | 76  | 72  | 77  | 79  | 78  | 53  | 59  | 57  |
| 32  | 30  | 34  | 35  | 33  | 35  | 39  | 30  | 34  | 27  |
| 55  | 43  | 54  | 61  | 82  | 98  | 95  | 72  | 80  | 50  |
| 84  | 74  | 76  | 297 | 352 | 332 | 397 | 385 | 455 | 190 |
| 84  | 67  | 84  | 84  | 111 | 101 | 100 | 87  | 70  | 68  |
| 38  | 41  | 46  | 61  | 76  | 68  | 66  | 57  | 63  | 51  |
| 51  | 58  | 60  | 108 | 142 | 136 | 115 | 110 | 111 | 62  |
| 29  | 21  | 19  | 22  | 48  | 38  | 26  | 33  | 22  | 21  |
| 52  | 53  | 64  | 63  | 94  | 83  | 76  | 66  | 93  | 38  |
| 36  | 31  | 33  | 43  | 63  | 55  | 55  | 54  | 62  | 37  |
| 69  | 76  | 70  | 69  | 63  | 66  | 92  | 81  | 68  | 55  |
| 58  | 67  | 67  | 185 | 240 | 186 | 168 | 157 | 171 | 89  |
| 30  | 33  | 29  | 45  | 49  | 59  | 52  | 46  | 45  | 39  |
| 54  | 46  | 57  | 89  | 97  | 75  | 66  | 57  | 61  | 53  |
| 151 | 189 | 190 | 246 | 318 | 296 | 180 | 164 | 195 | 164 |
| 40  | 27  | 48  | 28  | 32  | 36  | 22  | 27  | 25  | 36  |
| 83  | 82  | 105 | 81  | 134 | 127 | 110 | 99  | 106 | 78  |
| 38  | 31  | 46  | 41  | 43  | 43  | 43  | 34  | 48  | 28  |
| 22  | 37  | 34  | 61  | 73  | 50  | 58  | 42  | 52  | 24  |
| 32  | 38  | 36  | 48  | 59  | 77  | 53  | 39  | 59  | 46  |
| 33  | 31  | 41  | 31  | 28  | 44  | 40  | 28  | 33  | 26  |
| 18  | 15  | 22  | 22  | 9   | 9   | 12  | 15  | 15  | 18  |
| 41  | 48  | 48  | 27  | 39  | 39  | 43  | 25  | 35  | 29  |



|     |     |     |     |     |     |     |     |     |     |
|-----|-----|-----|-----|-----|-----|-----|-----|-----|-----|
| 36  | 39  | 33  | 56  | 64  | 60  | 51  | 48  | 47  | 53  |
| 14  | 10  | 8   | 8   | 6   | 12  | 12  | 5   | 4   | 3   |
| 34  | 54  | 41  | 29  | 45  | 25  | 25  | 36  | 26  | 19  |
| 40  | 50  | 35  | 35  | 48  | 55  | 46  | 36  | 56  | 38  |
| 45  | 41  | 26  | 27  | 26  | 24  | 25  | 34  | 28  | 30  |
| 17  | 29  | 25  | 26  | 27  | 16  | 22  | 19  | 15  | 20  |
| 30  | 26  | 47  | 34  | 44  | 33  | 54  | 52  | 41  | 34  |
| 41  | 51  | 55  | 31  | 65  | 44  | 44  | 28  | 42  | 50  |
| 35  | 44  | 32  | 32  | 39  | 28  | 46  | 42  | 43  | 26  |
| 45  | 40  | 53  | 96  | 130 | 104 | 61  | 57  | 47  | 32  |
| 37  | 26  | 34  | 48  | 61  | 57  | 51  | 33  | 43  | 26  |
| 51  | 46  | 49  | 78  | 96  | 100 | 94  | 91  | 98  | 42  |
| 78  | 80  | 70  | 118 | 150 | 143 | 103 | 109 | 91  | 63  |
| 22  | 17  | 20  | 43  | 44  | 33  | 29  | 42  | 30  | 30  |
| 38  | 35  | 54  | 80  | 98  | 80  | 81  | 59  | 66  | 42  |
| 72  | 54  | 58  | 100 | 134 | 99  | 126 | 131 | 103 | 67  |
| 40  | 37  | 42  | 65  | 95  | 85  | 84  | 68  | 90  | 51  |
| 65  | 70  | 71  | 94  | 142 | 133 | 100 | 89  | 93  | 66  |
| 42  | 44  | 51  | 76  | 107 | 93  | 71  | 58  | 80  | 44  |
| 115 | 134 | 133 | 146 | 178 | 153 | 138 | 137 | 152 | 98  |
| 67  | 47  | 61  | 73  | 92  | 69  | 67  | 65  | 72  | 47  |
| 72  | 73  | 86  | 97  | 111 | 95  | 137 | 102 | 122 | 81  |
| 48  | 41  | 49  | 65  | 85  | 66  | 63  | 84  | 64  | 47  |
| 64  | 54  | 56  | 33  | 27  | 37  | 45  | 51  | 47  | 37  |
| 25  | 27  | 25  | 60  | 82  | 75  | 66  | 73  | 86  | 47  |
| 37  | 52  | 54  | 45  | 45  | 31  | 39  | 41  | 46  | 38  |
| 24  | 20  | 21  | 14  | 16  | 9   | 30  | 24  | 21  | 18  |
| 60  | 66  | 77  | 62  | 68  | 65  | 66  | 60  | 58  | 63  |
| 38  | 45  | 49  | 52  | 67  | 59  | 62  | 53  | 63  | 39  |
| 52  | 66  | 67  | 128 | 148 | 129 | 145 | 145 | 168 | 85  |
| 49  | 51  | 57  | 94  | 93  | 89  | 80  | 62  | 92  | 53  |
| 39  | 47  | 46  | 45  | 40  | 41  | 59  | 74  | 66  | 41  |
| 47  | 38  | 52  | 40  | 50  | 45  | 35  | 38  | 36  | 42  |
| 13  | 21  | 16  | 20  | 34  | 23  | 42  | 41  | 33  | 14  |
| 22  | 20  | 24  | 36  | 41  | 31  | 55  | 46  | 37  | 27  |
| 21  | 18  | 12  | 17  | 24  | 8   | 27  | 28  | 23  | 19  |
| 40  | 36  | 41  | 69  | 82  | 62  | 122 | 104 | 106 | 48  |
| 77  | 70  | 70  | 79  | 89  | 81  | 110 | 78  | 102 | 69  |
| 60  | 74  | 67  | 80  | 111 | 90  | 84  | 68  | 81  | 69  |
| 92  | 94  | 101 | 64  | 90  | 73  | 117 | 126 | 140 | 100 |
| 69  | 59  | 71  | 73  | 98  | 63  | 95  | 75  | 79  | 54  |

|     |     |     |     |     |     |     |     |     |     |
|-----|-----|-----|-----|-----|-----|-----|-----|-----|-----|
| 76  | 65  | 64  | 70  | 58  | 74  | 64  | 68  | 82  | 72  |
| 53  | 54  | 48  | 74  | 78  | 75  | 110 | 103 | 114 | 67  |
| 51  | 46  | 42  | 47  | 62  | 44  | 51  | 61  | 44  | 47  |
| 60  | 72  | 66  | 107 | 114 | 86  | 72  | 95  | 71  | 54  |
| 84  | 87  | 88  | 77  | 91  | 85  | 71  | 69  | 76  | 60  |
| 69  | 69  | 79  | 135 | 167 | 166 | 111 | 88  | 121 | 67  |
| 24  | 40  | 29  | 45  | 69  | 60  | 37  | 36  | 41  | 36  |
| 41  | 54  | 57  | 51  | 75  | 63  | 50  | 41  | 43  | 33  |
| 56  | 45  | 34  | 60  | 86  | 66  | 55  | 56  | 62  | 32  |
| 36  | 50  | 41  | 60  | 82  | 65  | 69  | 59  | 53  | 49  |
| 45  | 47  | 49  | 57  | 68  | 73  | 46  | 44  | 51  | 48  |
| 52  | 57  | 56  | 72  | 116 | 104 | 68  | 65  | 88  | 61  |
| 37  | 38  | 24  | 23  | 27  | 25  | 26  | 24  | 29  | 23  |
| 50  | 58  | 52  | 70  | 97  | 80  | 72  | 62  | 86  | 57  |
| 42  | 33  | 34  | 77  | 100 | 111 | 70  | 56  | 55  | 39  |
| 46  | 41  | 56  | 49  | 59  | 52  | 41  | 32  | 34  | 33  |
| 57  | 57  | 61  | 43  | 61  | 55  | 57  | 37  | 36  | 32  |
| 66  | 62  | 52  | 94  | 109 | 119 | 159 | 109 | 116 | 84  |
| 42  | 36  | 39  | 30  | 53  | 44  | 66  | 63  | 85  | 40  |
| 56  | 58  | 52  | 52  | 70  | 47  | 44  | 52  | 80  | 39  |
| 36  | 50  | 49  | 64  | 66  | 63  | 42  | 33  | 41  | 36  |
| 121 | 95  | 123 | 73  | 125 | 76  | 93  | 87  | 97  | 56  |
| 43  | 44  | 61  | 84  | 127 | 102 | 130 | 102 | 109 | 52  |
| 34  | 38  | 41  | 49  | 54  | 42  | 46  | 40  | 50  | 44  |
| 33  | 36  | 29  | 36  | 45  | 50  | 48  | 44  | 73  | 48  |
| 49  | 56  | 64  | 84  | 90  | 76  | 84  | 60  | 80  | 68  |
| 30  | 18  | 27  | 43  | 56  | 61  | 86  | 79  | 73  | 45  |
| 48  | 50  | 52  | 83  | 115 | 94  | 92  | 76  | 79  | 63  |
| 41  | 54  | 48  | 57  | 61  | 64  | 56  | 53  | 49  | 51  |
| 54  | 67  | 58  | 102 | 133 | 96  | 110 | 98  | 124 | 54  |
| 42  | 25  | 32  | 44  | 64  | 38  | 48  | 46  | 48  | 30  |
| 35  | 25  | 30  | 52  | 76  | 71  | 39  | 42  | 36  | 33  |
| 99  | 68  | 75  | 146 | 210 | 162 | 188 | 140 | 166 | 84  |
| 87  | 72  | 83  | 254 | 266 | 245 | 227 | 190 | 230 | 122 |
| 55  | 38  | 44  | 67  | 103 | 79  | 60  | 60  | 56  | 44  |
| 150 | 133 | 143 | 131 | 149 | 123 | 161 | 164 | 184 | 116 |
| 58  | 60  | 65  | 155 | 168 | 148 | 127 | 118 | 117 | 73  |
| 78  | 53  | 70  | 116 | 127 | 132 | 117 | 92  | 115 | 70  |
| 22  | 32  | 16  | 51  | 91  | 64  | 50  | 31  | 42  | 29  |
| 44  | 47  | 65  | 106 | 136 | 116 | 87  | 100 | 86  | 69  |
| 54  | 48  | 42  | 33  | 48  | 57  | 40  | 41  | 38  | 34  |

|    |    |    |     |     |     |     |     |     |    |
|----|----|----|-----|-----|-----|-----|-----|-----|----|
| 49 | 39 | 53 | 65  | 89  | 70  | 64  | 51  | 49  | 43 |
| 55 | 53 | 55 | 40  | 41  | 47  | 49  | 37  | 41  | 40 |
| 61 | 92 | 84 | 75  | 66  | 84  | 88  | 54  | 74  | 80 |
| 46 | 43 | 60 | 27  | 34  | 27  | 41  | 35  | 55  | 35 |
| 51 | 65 | 55 | 47  | 47  | 54  | 45  | 31  | 43  | 38 |
| 34 | 18 | 19 | 19  | 22  | 26  | 13  | 18  | 18  | 25 |
| 28 | 26 | 23 | 34  | 40  | 31  | 21  | 30  | 41  | 25 |
| 5  | 4  | 6  | 5   | 1   | 3   | 4   | 4   | 0   | 8  |
| 34 | 31 | 34 | 50  | 38  | 53  | 51  | 30  | 45  | 23 |
| 26 | 32 | 31 | 58  | 58  | 62  | 70  | 69  | 81  | 37 |
| 14 | 19 | 16 | 4   | 5   | 5   | 11  | 7   | 10  | 10 |
| 36 | 25 | 34 | 17  | 25  | 18  | 21  | 15  | 13  | 21 |
| 8  | 6  | 16 | 1   | 3   | 4   | 7   | 4   | 5   | 5  |
| 14 | 18 | 13 | 8   | 6   | 14  | 7   | 6   | 10  | 7  |
| 61 | 85 | 84 | 80  | 87  | 89  | 77  | 72  | 90  | 53 |
| 31 | 29 | 34 | 23  | 18  | 13  | 24  | 36  | 31  | 26 |
| 29 | 16 | 48 | 26  | 36  | 23  | 24  | 43  | 33  | 28 |
| 53 | 39 | 43 | 49  | 48  | 48  | 58  | 43  | 58  | 44 |
| 53 | 43 | 34 | 64  | 57  | 64  | 60  | 54  | 55  | 34 |
| 46 | 40 | 34 | 72  | 89  | 76  | 65  | 33  | 51  | 33 |
| 33 | 27 | 33 | 16  | 25  | 16  | 20  | 16  | 20  | 27 |
| 31 | 17 | 20 | 25  | 27  | 22  | 32  | 19  | 28  | 19 |
| 20 | 23 | 20 | 15  | 13  | 10  | 16  | 8   | 12  | 13 |
| 47 | 48 | 63 | 111 | 119 | 96  | 150 | 126 | 149 | 81 |
| 78 | 84 | 89 | 52  | 90  | 76  | 67  | 56  | 60  | 46 |
| 46 | 38 | 31 | 34  | 49  | 45  | 52  | 47  | 57  | 54 |
| 54 | 75 | 78 | 161 | 189 | 151 | 176 | 162 | 190 | 91 |
| 35 | 41 | 53 | 66  | 64  | 67  | 80  | 54  | 66  | 33 |
| 44 | 54 | 57 | 59  | 77  | 72  | 105 | 53  | 78  | 44 |
| 48 | 33 | 44 | 107 | 150 | 125 | 110 | 107 | 119 | 57 |
| 68 | 64 | 67 | 126 | 159 | 146 | 148 | 130 | 143 | 81 |
| 33 | 37 | 36 | 93  | 96  | 121 | 90  | 82  | 108 | 48 |
| 38 | 19 | 29 | 247 | 280 | 285 | 161 | 149 | 154 | 74 |
| 39 | 43 | 41 | 85  | 107 | 113 | 98  | 89  | 89  | 56 |
| 30 | 13 | 22 | 47  | 65  | 51  | 45  | 37  | 29  | 20 |
| 17 | 13 | 13 | 30  | 31  | 26  | 31  | 23  | 23  | 8  |
| 32 | 44 | 48 | 141 | 185 | 172 | 84  | 88  | 79  | 42 |
| 21 | 15 | 28 | 25  | 27  | 31  | 19  | 12  | 13  | 17 |
| 42 | 50 | 42 | 48  | 70  | 52  | 42  | 39  | 38  | 40 |
| 27 | 18 | 24 | 31  | 42  | 26  | 17  | 14  | 13  | 15 |
| 40 | 30 | 43 | 102 | 128 | 111 | 212 | 137 | 176 | 90 |

|     |     |     |     |     |     |     |     |     |     |
|-----|-----|-----|-----|-----|-----|-----|-----|-----|-----|
| 39  | 44  | 44  | 49  | 73  | 56  | 55  | 74  | 61  | 49  |
| 45  | 47  | 49  | 97  | 113 | 81  | 70  | 48  | 78  | 38  |
| 20  | 19  | 23  | 40  | 66  | 35  | 32  | 43  | 52  | 33  |
| 31  | 42  | 34  | 125 | 134 | 123 | 77  | 83  | 92  | 32  |
| 56  | 55  | 67  | 99  | 125 | 104 | 129 | 133 | 118 | 74  |
| 76  | 81  | 81  | 82  | 115 | 95  | 107 | 80  | 92  | 60  |
| 36  | 45  | 47  | 108 | 145 | 140 | 98  | 79  | 94  | 50  |
| 31  | 38  | 28  | 71  | 100 | 80  | 68  | 96  | 83  | 47  |
| 63  | 61  | 80  | 190 | 208 | 175 | 154 | 140 | 143 | 82  |
| 49  | 48  | 71  | 85  | 129 | 109 | 137 | 116 | 143 | 74  |
| 81  | 84  | 94  | 151 | 214 | 176 | 222 | 165 | 196 | 84  |
| 31  | 37  | 25  | 66  | 105 | 88  | 61  | 79  | 62  | 31  |
| 18  | 23  | 24  | 37  | 48  | 29  | 78  | 74  | 61  | 38  |
| 21  | 16  | 29  | 64  | 73  | 60  | 69  | 60  | 71  | 31  |
| 26  | 25  | 29  | 34  | 71  | 46  | 48  | 45  | 53  | 21  |
| 49  | 48  | 49  | 126 | 121 | 141 | 84  | 85  | 86  | 51  |
| 42  | 43  | 50  | 37  | 54  | 41  | 48  | 59  | 54  | 53  |
| 38  | 38  | 33  | 97  | 105 | 84  | 52  | 51  | 39  | 33  |
| 39  | 28  | 44  | 50  | 57  | 64  | 49  | 52  | 40  | 34  |
| 23  | 23  | 20  | 38  | 27  | 31  | 30  | 26  | 34  | 23  |
| 76  | 75  | 90  | 151 | 198 | 165 | 102 | 84  | 103 | 83  |
| 35  | 49  | 48  | 112 | 177 | 159 | 147 | 128 | 155 | 77  |
| 38  | 25  | 38  | 61  | 54  | 51  | 48  | 33  | 31  | 30  |
| 49  | 52  | 60  | 90  | 93  | 109 | 99  | 88  | 87  | 62  |
| 47  | 40  | 30  | 37  | 61  | 37  | 40  | 42  | 56  | 49  |
| 63  | 65  | 63  | 72  | 91  | 81  | 111 | 98  | 105 | 67  |
| 56  | 45  | 58  | 103 | 143 | 112 | 132 | 115 | 110 | 60  |
| 81  | 74  | 82  | 45  | 72  | 71  | 79  | 66  | 75  | 66  |
| 43  | 48  | 53  | 75  | 92  | 66  | 72  | 54  | 56  | 39  |
| 89  | 91  | 103 | 69  | 105 | 77  | 84  | 52  | 62  | 45  |
| 36  | 33  | 31  | 99  | 126 | 111 | 116 | 85  | 110 | 47  |
| 37  | 49  | 46  | 55  | 64  | 72  | 65  | 62  | 69  | 54  |
| 111 | 103 | 140 | 117 | 109 | 102 | 133 | 102 | 115 | 63  |
| 34  | 29  | 26  | 67  | 88  | 88  | 60  | 51  | 57  | 48  |
| 67  | 74  | 73  | 122 | 160 | 155 | 207 | 205 | 178 | 94  |
| 130 | 144 | 160 | 198 | 244 | 202 | 242 | 269 | 254 | 174 |
| 41  | 43  | 49  | 57  | 104 | 92  | 74  | 81  | 83  | 46  |
| 67  | 64  | 68  | 151 | 197 | 174 | 145 | 108 | 129 | 62  |
| 30  | 27  | 27  | 58  | 98  | 58  | 55  | 56  | 67  | 30  |
| 50  | 48  | 40  | 70  | 89  | 92  | 60  | 75  | 80  | 57  |
| 65  | 76  | 80  | 157 | 182 | 175 | 203 | 193 | 220 | 110 |

|    |    |    |     |     |     |     |     |     |     |
|----|----|----|-----|-----|-----|-----|-----|-----|-----|
| 22 | 16 | 12 | 72  | 78  | 74  | 37  | 34  | 32  | 15  |
| 41 | 33 | 33 | 107 | 170 | 107 | 73  | 84  | 80  | 43  |
| 62 | 68 | 68 | 240 | 306 | 265 | 225 | 197 | 205 | 108 |
| 45 | 37 | 48 | 72  | 129 | 111 | 99  | 90  | 99  | 60  |
| 58 | 46 | 64 | 176 | 192 | 172 | 164 | 137 | 130 | 77  |
| 21 | 29 | 21 | 44  | 62  | 53  | 31  | 38  | 46  | 24  |
| 37 | 34 | 33 | 32  | 42  | 41  | 45  | 40  | 47  | 32  |
| 56 | 49 | 34 | 64  | 69  | 50  | 78  | 57  | 76  | 39  |
| 54 | 56 | 56 | 47  | 77  | 83  | 73  | 71  | 64  | 46  |
| 37 | 54 | 44 | 105 | 127 | 83  | 103 | 90  | 103 | 66  |
| 42 | 41 | 33 | 72  | 108 | 60  | 56  | 43  | 69  | 48  |
| 55 | 65 | 56 | 96  | 117 | 104 | 84  | 73  | 96  | 64  |
| 30 | 39 | 28 | 32  | 48  | 35  | 30  | 19  | 31  | 24  |
| 53 | 50 | 46 | 38  | 32  | 32  | 41  | 40  | 32  | 47  |
| 47 | 50 | 55 | 31  | 38  | 34  | 42  | 35  | 32  | 34  |
| 50 | 44 | 53 | 76  | 93  | 73  | 99  | 89  | 95  | 53  |
| 85 | 71 | 58 | 140 | 183 | 165 | 173 | 147 | 177 | 89  |
| 72 | 65 | 80 | 125 | 141 | 142 | 92  | 101 | 110 | 78  |
| 47 | 59 | 56 | 169 | 212 | 176 | 175 | 143 | 174 | 80  |
| 68 | 55 | 65 | 216 | 258 | 225 | 273 | 262 | 288 | 130 |
| 17 | 9  | 10 | 9   | 10  | 11  | 19  | 8   | 13  | 5   |
| 55 | 60 | 56 | 124 | 129 | 129 | 127 | 99  | 98  | 72  |
| 16 | 22 | 19 | 28  | 34  | 32  | 26  | 24  | 31  | 18  |
| 36 | 31 | 45 | 55  | 50  | 50  | 46  | 46  | 55  | 39  |
| 42 | 44 | 54 | 55  | 79  | 70  | 56  | 54  | 55  | 40  |
| 49 | 62 | 60 | 57  | 83  | 65  | 61  | 70  | 84  | 66  |
| 24 | 26 | 35 | 27  | 35  | 25  | 40  | 31  | 18  | 31  |
| 42 | 34 | 28 | 60  | 74  | 64  | 62  | 62  | 72  | 40  |
| 37 | 34 | 36 | 42  | 57  | 47  | 48  | 32  | 41  | 34  |
| 57 | 43 | 55 | 44  | 66  | 80  | 65  | 61  | 65  | 35  |
| 24 | 37 | 24 | 55  | 77  | 68  | 58  | 62  | 64  | 27  |
| 66 | 69 | 61 | 168 | 184 | 188 | 149 | 117 | 150 | 95  |
| 41 | 32 | 49 | 169 | 221 | 206 | 216 | 195 | 200 | 100 |
| 91 | 97 | 81 | 207 | 264 | 239 | 252 | 239 | 250 | 130 |
| 49 | 43 | 63 | 151 | 200 | 171 | 167 | 155 | 183 | 70  |
| 40 | 43 | 34 | 211 | 277 | 242 | 202 | 214 | 206 | 106 |
| 21 | 28 | 21 | 208 | 242 | 189 | 126 | 115 | 130 | 53  |
| 41 | 51 | 50 | 318 | 416 | 376 | 477 | 446 | 445 | 189 |
| 33 | 49 | 48 | 202 | 291 | 220 | 226 | 207 | 190 | 92  |
| 29 | 40 | 25 | 139 | 175 | 167 | 174 | 145 | 177 | 73  |
| 87 | 74 | 68 | 385 | 462 | 401 | 433 | 355 | 423 | 191 |

|    |     |     |     |     |     |     |     |     |     |
|----|-----|-----|-----|-----|-----|-----|-----|-----|-----|
| 49 | 42  | 48  | 405 | 486 | 423 | 268 | 198 | 274 | 111 |
| 42 | 39  | 44  | 35  | 48  | 41  | 41  | 40  | 46  | 41  |
| 32 | 23  | 23  | 33  | 50  | 31  | 24  | 27  | 23  | 17  |
| 25 | 28  | 29  | 48  | 77  | 68  | 39  | 40  | 47  | 30  |
| 13 | 8   | 9   | 14  | 6   | 11  | 9   | 6   | 6   | 12  |
| 85 | 72  | 85  | 28  | 44  | 42  | 42  | 47  | 43  | 66  |
| 81 | 79  | 79  | 51  | 61  | 46  | 49  | 56  | 57  | 50  |
| 37 | 34  | 74  | 41  | 51  | 41  | 38  | 41  | 42  | 43  |
| 57 | 50  | 67  | 26  | 36  | 30  | 28  | 19  | 20  | 50  |
| 23 | 24  | 31  | 20  | 22  | 20  | 20  | 15  | 18  | 22  |
| 22 | 35  | 35  | 24  | 26  | 29  | 41  | 38  | 31  | 13  |
| 29 | 32  | 35  | 45  | 45  | 55  | 32  | 31  | 31  | 25  |
| 88 | 82  | 90  | 80  | 94  | 79  | 107 | 86  | 86  | 59  |
| 17 | 21  | 28  | 12  | 13  | 25  | 12  | 8   | 6   | 15  |
| 30 | 41  | 50  | 63  | 78  | 47  | 47  | 41  | 31  | 38  |
| 41 | 35  | 42  | 62  | 91  | 56  | 35  | 28  | 29  | 44  |
| 47 | 60  | 48  | 82  | 86  | 93  | 113 | 104 | 107 | 64  |
| 41 | 47  | 54  | 66  | 84  | 77  | 67  | 88  | 76  | 44  |
| 34 | 54  | 38  | 37  | 58  | 36  | 31  | 39  | 39  | 36  |
| 40 | 41  | 38  | 47  | 37  | 42  | 26  | 36  | 30  | 30  |
| 25 | 13  | 20  | 32  | 52  | 35  | 28  | 34  | 33  | 20  |
| 26 | 16  | 28  | 31  | 47  | 35  | 30  | 27  | 22  | 26  |
| 43 | 72  | 83  | 80  | 107 | 114 | 119 | 103 | 110 | 98  |
| 50 | 75  | 67  | 73  | 122 | 97  | 110 | 93  | 95  | 55  |
| 33 | 39  | 45  | 48  | 64  | 71  | 44  | 50  | 47  | 42  |
| 50 | 51  | 53  | 123 | 158 | 144 | 182 | 157 | 200 | 70  |
| 60 | 50  | 40  | 38  | 58  | 41  | 44  | 36  | 40  | 32  |
| 8  | 3   | 6   | 6   | 1   | 4   | 8   | 9   | 11  | 7   |
| 89 | 119 | 106 | 118 | 152 | 132 | 114 | 103 | 132 | 85  |
| 22 | 14  | 20  | 9   | 14  | 12  | 20  | 16  | 16  | 13  |
| 82 | 70  | 63  | 33  | 63  | 46  | 52  | 51  | 54  | 50  |
| 22 | 27  | 25  | 34  | 47  | 32  | 27  | 30  | 33  | 35  |
| 38 | 44  | 38  | 57  | 77  | 77  | 48  | 42  | 33  | 23  |
| 13 | 13  | 15  | 16  | 20  | 8   | 15  | 12  | 13  | 19  |
| 64 | 57  | 62  | 77  | 99  | 86  | 67  | 64  | 65  | 57  |
| 74 | 63  | 79  | 127 | 139 | 111 | 118 | 112 | 105 | 78  |
| 53 | 55  | 38  | 60  | 73  | 67  | 48  | 44  | 42  | 28  |
| 26 | 26  | 31  | 22  | 28  | 36  | 23  | 26  | 29  | 19  |
| 49 | 47  | 44  | 37  | 63  | 56  | 42  | 40  | 53  | 32  |
| 73 | 63  | 64  | 127 | 160 | 143 | 132 | 112 | 107 | 69  |
| 32 | 27  | 37  | 54  | 61  | 42  | 58  | 38  | 47  | 33  |

|     |     |     |     |     |     |     |     |     |    |
|-----|-----|-----|-----|-----|-----|-----|-----|-----|----|
| 20  | 27  | 40  | 49  | 45  | 38  | 47  | 32  | 32  | 26 |
| 49  | 33  | 53  | 179 | 228 | 208 | 164 | 162 | 159 | 70 |
| 27  | 30  | 35  | 32  | 47  | 41  | 37  | 28  | 32  | 27 |
| 35  | 25  | 27  | 24  | 40  | 41  | 29  | 16  | 29  | 23 |
| 59  | 44  | 35  | 55  | 75  | 57  | 42  | 45  | 53  | 50 |
| 34  | 33  | 49  | 39  | 38  | 37  | 16  | 13  | 24  | 31 |
| 30  | 28  | 25  | 24  | 26  | 25  | 28  | 20  | 22  | 29 |
| 65  | 84  | 60  | 64  | 43  | 42  | 46  | 43  | 58  | 75 |
| 27  | 12  | 18  | 18  | 24  | 14  | 12  | 13  | 16  | 12 |
| 23  | 27  | 23  | 60  | 75  | 66  | 60  | 40  | 51  | 43 |
| 37  | 46  | 48  | 46  | 72  | 76  | 86  | 66  | 57  | 34 |
| 10  | 17  | 13  | 10  | 6   | 12  | 11  | 11  | 5   | 10 |
| 28  | 27  | 30  | 16  | 25  | 20  | 20  | 20  | 24  | 24 |
| 68  | 52  | 49  | 75  | 101 | 82  | 85  | 70  | 78  | 56 |
| 49  | 28  | 53  | 47  | 63  | 68  | 59  | 56  | 58  | 48 |
| 54  | 57  | 71  | 55  | 63  | 54  | 65  | 47  | 56  | 54 |
| 69  | 57  | 63  | 30  | 35  | 38  | 48  | 46  | 56  | 50 |
| 40  | 46  | 43  | 48  | 59  | 50  | 67  | 37  | 39  | 38 |
| 45  | 51  | 54  | 46  | 49  | 57  | 43  | 36  | 45  | 40 |
| 41  | 47  | 54  | 53  | 63  | 58  | 55  | 66  | 56  | 48 |
| 177 | 160 | 176 | 53  | 52  | 55  | 66  | 86  | 82  | 78 |
| 37  | 35  | 36  | 57  | 69  | 63  | 62  | 50  | 56  | 34 |
| 40  | 41  | 48  | 51  | 55  | 54  | 35  | 47  | 44  | 50 |
| 26  | 26  | 35  | 31  | 41  | 31  | 22  | 29  | 22  | 39 |
| 22  | 25  | 29  | 38  | 42  | 42  | 36  | 36  | 31  | 23 |
| 75  | 88  | 71  | 79  | 96  | 79  | 80  | 86  | 71  | 73 |
| 39  | 21  | 46  | 22  | 20  | 21  | 23  | 25  | 30  | 29 |
| 31  | 42  | 29  | 10  | 23  | 21  | 27  | 22  | 20  | 30 |
| 49  | 56  | 60  | 79  | 85  | 99  | 85  | 69  | 85  | 58 |
| 41  | 27  | 48  | 80  | 111 | 107 | 76  | 63  | 69  | 41 |
| 33  | 33  | 44  | 59  | 92  | 63  | 60  | 55  | 49  | 42 |
| 49  | 49  | 47  | 85  | 117 | 90  | 70  | 55  | 58  | 48 |
| 47  | 50  | 66  | 60  | 64  | 86  | 76  | 48  | 56  | 38 |
| 21  | 31  | 30  | 19  | 16  | 13  | 18  | 11  | 18  | 22 |
| 45  | 45  | 55  | 63  | 72  | 52  | 60  | 40  | 51  | 38 |
| 59  | 47  | 77  | 149 | 169 | 156 | 64  | 63  | 84  | 56 |
| 19  | 24  | 35  | 18  | 26  | 27  | 16  | 20  | 16  | 21 |
| 56  | 39  | 47  | 39  | 57  | 45  | 42  | 41  | 47  | 60 |
| 55  | 72  | 67  | 87  | 89  | 86  | 92  | 102 | 79  | 80 |
| 48  | 37  | 48  | 6   | 13  | 9   | 15  | 14  | 9   | 36 |
| 59  | 63  | 57  | 45  | 43  | 53  | 56  | 39  | 43  | 43 |

|    |    |    |     |     |     |     |     |     |    |
|----|----|----|-----|-----|-----|-----|-----|-----|----|
| 42 | 23 | 36 | 25  | 31  | 23  | 42  | 30  | 24  | 24 |
| 64 | 57 | 70 | 89  | 103 | 103 | 81  | 62  | 66  | 61 |
| 49 | 42 | 55 | 18  | 36  | 36  | 32  | 38  | 39  | 39 |
| 72 | 51 | 64 | 57  | 56  | 64  | 52  | 48  | 49  | 42 |
| 30 | 34 | 35 | 33  | 38  | 44  | 41  | 36  | 30  | 35 |
| 42 | 43 | 37 | 36  | 41  | 24  | 56  | 39  | 36  | 42 |
| 61 | 59 | 62 | 70  | 73  | 76  | 59  | 58  | 56  | 54 |
| 82 | 78 | 89 | 74  | 83  | 57  | 99  | 147 | 125 | 94 |
| 27 | 25 | 30 | 52  | 50  | 72  | 54  | 39  | 38  | 24 |
| 49 | 61 | 56 | 66  | 84  | 92  | 84  | 74  | 69  | 44 |
| 36 | 32 | 36 | 37  | 66  | 59  | 39  | 42  | 32  | 37 |
| 51 | 45 | 38 | 86  | 106 | 105 | 92  | 110 | 112 | 62 |
| 44 | 40 | 37 | 46  | 41  | 40  | 38  | 41  | 43  | 36 |
| 31 | 42 | 37 | 58  | 80  | 68  | 53  | 59  | 39  | 32 |
| 20 | 25 | 17 | 24  | 40  | 31  | 30  | 26  | 31  | 17 |
| 50 | 62 | 51 | 122 | 149 | 132 | 159 | 132 | 177 | 82 |
| 36 | 47 | 59 | 94  | 136 | 108 | 101 | 74  | 79  | 55 |
| 34 | 42 | 41 | 93  | 78  | 91  | 92  | 71  | 81  | 41 |
| 23 | 20 | 21 | 16  | 37  | 20  | 39  | 32  | 34  | 22 |
| 25 | 33 | 28 | 22  | 31  | 34  | 24  | 18  | 26  | 29 |
| 40 | 36 | 43 | 60  | 40  | 48  | 49  | 42  | 47  | 37 |
| 52 | 50 | 75 | 87  | 79  | 98  | 104 | 93  | 88  | 73 |
| 31 | 24 | 28 | 21  | 28  | 37  | 28  | 23  | 30  | 28 |
| 61 | 73 | 84 | 75  | 104 | 99  | 103 | 88  | 104 | 81 |
| 64 | 50 | 53 | 42  | 72  | 62  | 85  | 82  | 76  | 63 |
| 45 | 52 | 31 | 22  | 27  | 27  | 39  | 29  | 38  | 36 |
| 11 | 12 | 19 | 7   | 12  | 11  | 13  | 8   | 12  | 19 |
| 23 | 11 | 26 | 7   | 10  | 10  | 10  | 11  | 6   | 10 |
| 21 | 16 | 21 | 12  | 22  | 17  | 20  | 14  | 11  | 22 |
| 22 | 15 | 17 | 10  | 14  | 11  | 11  | 8   | 23  | 11 |
| 26 | 28 | 24 | 33  | 43  | 37  | 54  | 48  | 51  | 32 |
| 17 | 12 | 13 | 8   | 17  | 6   | 13  | 10  | 4   | 9  |
| 45 | 53 | 46 | 72  | 88  | 82  | 107 | 98  | 103 | 65 |
| 8  | 11 | 13 | 2   | 7   | 10  | 8   | 6   | 5   | 11 |
| 23 | 27 | 21 | 33  | 37  | 25  | 31  | 32  | 37  | 31 |
| 25 | 31 | 25 | 73  | 103 | 79  | 77  | 68  | 85  | 46 |
| 32 | 35 | 27 | 37  | 49  | 40  | 43  | 33  | 36  | 18 |
| 56 | 68 | 64 | 111 | 131 | 127 | 99  | 104 | 106 | 71 |
| 51 | 50 | 61 | 82  | 115 | 104 | 134 | 119 | 132 | 79 |
| 63 | 54 | 72 | 67  | 85  | 79  | 75  | 92  | 92  | 77 |
| 49 | 48 | 47 | 69  | 75  | 69  | 84  | 66  | 82  | 40 |



|    |    |     |     |     |     |     |     |     |     |
|----|----|-----|-----|-----|-----|-----|-----|-----|-----|
| 54 | 51 | 56  | 63  | 81  | 75  | 73  | 61  | 79  | 52  |
| 30 | 35 | 42  | 36  | 36  | 33  | 34  | 33  | 22  | 33  |
| 76 | 84 | 100 | 51  | 68  | 70  | 95  | 70  | 86  | 82  |
| 34 | 45 | 61  | 59  | 93  | 80  | 67  | 64  | 75  | 45  |
| 40 | 47 | 42  | 59  | 67  | 63  | 56  | 59  | 59  | 49  |
| 28 | 22 | 31  | 12  | 22  | 30  | 17  | 21  | 19  | 25  |
| 30 | 27 | 31  | 49  | 55  | 53  | 67  | 38  | 52  | 41  |
| 49 | 48 | 49  | 35  | 51  | 49  | 42  | 55  | 63  | 53  |
| 26 | 36 | 26  | 20  | 12  | 31  | 19  | 15  | 23  | 25  |
| 12 | 12 | 15  | 13  | 17  | 12  | 19  | 15  | 15  | 20  |
| 24 | 29 | 43  | 101 | 129 | 105 | 80  | 75  | 68  | 45  |
| 29 | 28 | 24  | 26  | 36  | 31  | 25  | 25  | 26  | 28  |
| 32 | 35 | 34  | 41  | 64  | 45  | 30  | 30  | 28  | 33  |
| 25 | 34 | 26  | 78  | 91  | 74  | 80  | 70  | 56  | 37  |
| 45 | 62 | 44  | 108 | 156 | 162 | 131 | 104 | 127 | 78  |
| 37 | 27 | 46  | 124 | 138 | 141 | 128 | 92  | 133 | 58  |
| 8  | 15 | 9   | 8   | 21  | 17  | 22  | 18  | 27  | 12  |
| 77 | 92 | 78  | 155 | 202 | 179 | 175 | 126 | 180 | 64  |
| 56 | 53 | 55  | 119 | 141 | 143 | 103 | 97  | 109 | 68  |
| 43 | 25 | 37  | 44  | 72  | 81  | 67  | 59  | 64  | 35  |
| 42 | 52 | 56  | 189 | 216 | 202 | 227 | 160 | 188 | 80  |
| 35 | 27 | 45  | 65  | 106 | 91  | 88  | 67  | 77  | 49  |
| 27 | 34 | 31  | 44  | 63  | 60  | 58  | 57  | 74  | 45  |
| 47 | 47 | 62  | 68  | 59  | 61  | 57  | 51  | 76  | 51  |
| 51 | 54 | 68  | 66  | 67  | 70  | 90  | 74  | 82  | 52  |
| 21 | 21 | 12  | 22  | 36  | 18  | 22  | 24  | 35  | 17  |
| 39 | 52 | 49  | 49  | 60  | 49  | 54  | 60  | 57  | 45  |
| 68 | 78 | 73  | 141 | 160 | 155 | 160 | 130 | 159 | 114 |
| 57 | 63 | 87  | 189 | 240 | 200 | 189 | 206 | 202 | 98  |
| 33 | 44 | 51  | 27  | 43  | 28  | 40  | 35  | 29  | 28  |
| 34 | 44 | 34  | 82  | 96  | 65  | 48  | 34  | 49  | 29  |
| 31 | 33 | 43  | 50  | 40  | 48  | 37  | 36  | 38  | 39  |
| 75 | 74 | 81  | 494 | 661 | 608 | 372 | 340 | 352 | 166 |
| 39 | 34 | 43  | 241 | 329 | 293 | 258 | 244 | 266 | 93  |
| 34 | 20 | 22  | 91  | 113 | 119 | 96  | 79  | 91  | 34  |
| 17 | 12 | 20  | 23  | 22  | 20  | 26  | 28  | 32  | 23  |
| 74 | 68 | 82  | 210 | 221 | 188 | 183 | 153 | 175 | 112 |
| 29 | 26 | 42  | 142 | 205 | 157 | 128 | 111 | 126 | 57  |
| 49 | 45 | 59  | 103 | 145 | 143 | 105 | 117 | 104 | 60  |
| 43 | 55 | 60  | 99  | 95  | 108 | 81  | 58  | 85  | 64  |
| 28 | 22 | 22  | 27  | 36  | 33  | 22  | 25  | 42  | 22  |

|     |     |     |     |     |     |     |     |     |     |
|-----|-----|-----|-----|-----|-----|-----|-----|-----|-----|
| 38  | 39  | 41  | 73  | 72  | 63  | 68  | 59  | 62  | 48  |
| 65  | 51  | 52  | 108 | 125 | 118 | 129 | 121 | 122 | 60  |
| 29  | 25  | 20  | 40  | 48  | 42  | 53  | 50  | 62  | 38  |
| 67  | 78  | 74  | 103 | 102 | 85  | 112 | 100 | 137 | 104 |
| 64  | 63  | 75  | 80  | 110 | 86  | 134 | 131 | 149 | 84  |
| 48  | 44  | 52  | 83  | 136 | 114 | 178 | 136 | 182 | 92  |
| 41  | 41  | 41  | 88  | 85  | 85  | 100 | 105 | 101 | 68  |
| 22  | 24  | 19  | 30  | 56  | 39  | 37  | 30  | 34  | 20  |
| 32  | 16  | 36  | 44  | 47  | 30  | 44  | 41  | 46  | 31  |
| 35  | 33  | 35  | 57  | 88  | 71  | 86  | 78  | 96  | 45  |
| 62  | 102 | 98  | 118 | 130 | 108 | 153 | 157 | 139 | 85  |
| 65  | 53  | 77  | 143 | 180 | 181 | 132 | 123 | 120 | 52  |
| 46  | 53  | 44  | 212 | 307 | 271 | 238 | 231 | 220 | 92  |
| 31  | 50  | 42  | 176 | 238 | 187 | 130 | 113 | 122 | 56  |
| 36  | 31  | 47  | 106 | 161 | 137 | 117 | 114 | 106 | 63  |
| 70  | 53  | 65  | 116 | 169 | 158 | 111 | 100 | 111 | 68  |
| 35  | 35  | 27  | 88  | 117 | 103 | 100 | 87  | 97  | 45  |
| 63  | 72  | 70  | 384 | 528 | 451 | 842 | 659 | 817 | 350 |
| 35  | 18  | 34  | 184 | 223 | 223 | 143 | 115 | 144 | 71  |
| 41  | 49  | 47  | 160 | 174 | 178 | 189 | 180 | 183 | 80  |
| 22  | 30  | 30  | 180 | 266 | 164 | 133 | 137 | 127 | 68  |
| 48  | 49  | 32  | 315 | 434 | 371 | 261 | 230 | 270 | 118 |
| 73  | 75  | 88  | 172 | 217 | 175 | 239 | 206 | 231 | 113 |
| 43  | 41  | 30  | 56  | 98  | 81  | 85  | 63  | 67  | 46  |
| 36  | 31  | 25  | 143 | 193 | 162 | 149 | 134 | 154 | 57  |
| 32  | 53  | 44  | 108 | 146 | 126 | 116 | 102 | 127 | 60  |
| 26  | 15  | 17  | 74  | 88  | 82  | 73  | 69  | 96  | 30  |
| 13  | 16  | 21  | 49  | 60  | 39  | 59  | 62  | 51  | 23  |
| 48  | 42  | 48  | 97  | 131 | 102 | 105 | 73  | 94  | 35  |
| 29  | 34  | 28  | 67  | 102 | 84  | 71  | 76  | 90  | 43  |
| 31  | 35  | 43  | 24  | 32  | 26  | 29  | 25  | 31  | 21  |
| 46  | 49  | 55  | 48  | 60  | 64  | 53  | 53  | 70  | 39  |
| 58  | 63  | 53  | 57  | 65  | 71  | 85  | 83  | 82  | 60  |
| 29  | 39  | 46  | 60  | 84  | 61  | 45  | 54  | 49  | 46  |
| 80  | 87  | 80  | 58  | 69  | 55  | 103 | 98  | 96  | 75  |
| 47  | 51  | 53  | 50  | 46  | 61  | 59  | 72  | 72  | 52  |
| 32  | 39  | 54  | 47  | 43  | 45  | 46  | 60  | 68  | 42  |
| 94  | 82  | 92  | 82  | 70  | 114 | 118 | 98  | 129 | 90  |
| 116 | 132 | 161 | 133 | 171 | 157 | 223 | 246 | 256 | 143 |
| 36  | 48  | 50  | 59  | 57  | 57  | 58  | 48  | 57  | 36  |
| 59  | 66  | 69  | 92  | 96  | 98  | 91  | 72  | 76  | 64  |

|    |    |     |     |     |     |     |     |     |     |
|----|----|-----|-----|-----|-----|-----|-----|-----|-----|
| 43 | 51 | 52  | 50  | 41  | 56  | 49  | 35  | 36  | 39  |
| 31 | 27 | 27  | 262 | 330 | 273 | 326 | 298 | 343 | 163 |
| 27 | 26 | 40  | 55  | 62  | 49  | 42  | 35  | 48  | 28  |
| 9  | 18 | 25  | 57  | 58  | 59  | 35  | 28  | 28  | 23  |
| 49 | 54 | 54  | 102 | 121 | 101 | 98  | 103 | 85  | 74  |
| 39 | 40 | 43  | 42  | 45  | 48  | 42  | 46  | 46  | 28  |
| 28 | 27 | 32  | 30  | 35  | 26  | 23  | 14  | 22  | 28  |
| 45 | 49 | 58  | 60  | 69  | 47  | 90  | 71  | 64  | 52  |
| 60 | 62 | 59  | 76  | 78  | 83  | 112 | 86  | 82  | 57  |
| 36 | 27 | 36  | 41  | 51  | 40  | 50  | 46  | 44  | 39  |
| 52 | 51 | 73  | 152 | 199 | 184 | 154 | 112 | 119 | 74  |
| 46 | 48 | 54  | 79  | 93  | 85  | 76  | 68  | 87  | 68  |
| 29 | 47 | 43  | 203 | 253 | 228 | 249 | 214 | 230 | 116 |
| 40 | 51 | 36  | 172 | 234 | 199 | 217 | 180 | 183 | 97  |
| 63 | 58 | 56  | 214 | 271 | 238 | 226 | 212 | 240 | 142 |
| 31 | 35 | 22  | 54  | 76  | 60  | 60  | 61  | 61  | 40  |
| 54 | 52 | 64  | 43  | 62  | 63  | 67  | 62  | 70  | 52  |
| 46 | 42 | 41  | 34  | 35  | 38  | 40  | 29  | 37  | 41  |
| 64 | 51 | 68  | 125 | 179 | 160 | 130 | 119 | 143 | 78  |
| 54 | 50 | 53  | 19  | 32  | 28  | 33  | 29  | 34  | 56  |
| 86 | 80 | 78  | 60  | 86  | 68  | 93  | 71  | 94  | 67  |
| 57 | 71 | 66  | 114 | 166 | 146 | 138 | 125 | 103 | 83  |
| 52 | 59 | 60  | 69  | 63  | 42  | 60  | 58  | 50  | 50  |
| 42 | 44 | 49  | 32  | 48  | 38  | 37  | 33  | 47  | 39  |
| 64 | 88 | 101 | 46  | 54  | 51  | 59  | 43  | 41  | 45  |
| 72 | 97 | 105 | 164 | 208 | 150 | 247 | 226 | 251 | 114 |
| 65 | 71 | 72  | 151 | 215 | 162 | 177 | 154 | 203 | 94  |
| 27 | 32 | 23  | 34  | 30  | 25  | 32  | 40  | 27  | 30  |
| 22 | 12 | 22  | 6   | 6   | 7   | 10  | 11  | 8   | 13  |
| 18 | 12 | 19  | 10  | 10  | 4   | 11  | 15  | 13  | 15  |
| 39 | 37 | 50  | 30  | 44  | 28  | 38  | 27  | 36  | 26  |
| 11 | 14 | 11  | 6   | 4   | 2   | 4   | 5   | 11  | 11  |
| 22 | 26 | 22  | 17  | 37  | 34  | 31  | 25  | 30  | 26  |
| 25 | 19 | 29  | 49  | 48  | 52  | 43  | 30  | 40  | 23  |
| 40 | 59 | 54  | 34  | 40  | 34  | 27  | 26  | 39  | 43  |
| 41 | 35 | 41  | 17  | 23  | 29  | 20  | 26  | 28  | 26  |
| 53 | 76 | 94  | 58  | 78  | 83  | 75  | 65  | 74  | 62  |
| 58 | 65 | 70  | 57  | 63  | 64  | 48  | 53  | 42  | 60  |
| 26 | 49 | 39  | 64  | 83  | 83  | 94  | 85  | 77  | 51  |
| 85 | 84 | 77  | 76  | 95  | 87  | 101 | 114 | 109 | 69  |
| 26 | 35 | 32  | 29  | 36  | 35  | 50  | 46  | 51  | 36  |

|    |    |    |     |     |     |     |     |     |     |
|----|----|----|-----|-----|-----|-----|-----|-----|-----|
| 53 | 61 | 85 | 104 | 125 | 116 | 182 | 190 | 200 | 88  |
| 42 | 55 | 50 | 91  | 119 | 106 | 128 | 117 | 139 | 70  |
| 37 | 46 | 29 | 75  | 77  | 91  | 75  | 73  | 69  | 45  |
| 47 | 41 | 38 | 39  | 59  | 54  | 47  | 41  | 44  | 30  |
| 27 | 33 | 26 | 23  | 31  | 22  | 33  | 27  | 29  | 18  |
| 10 | 7  | 4  | 3   | 3   | 5   | 8   | 6   | 2   | 9   |
| 57 | 37 | 45 | 52  | 59  | 61  | 72  | 76  | 79  | 53  |
| 51 | 44 | 54 | 38  | 48  | 58  | 48  | 49  | 48  | 32  |
| 52 | 46 | 38 | 23  | 20  | 20  | 31  | 39  | 31  | 38  |
| 31 | 33 | 36 | 27  | 43  | 33  | 33  | 27  | 39  | 29  |
| 30 | 33 | 43 | 107 | 98  | 87  | 87  | 66  | 94  | 54  |
| 36 | 29 | 34 | 140 | 196 | 211 | 177 | 166 | 185 | 86  |
| 32 | 31 | 25 | 53  | 73  | 55  | 65  | 48  | 49  | 27  |
| 15 | 7  | 8  | 31  | 41  | 25  | 20  | 25  | 19  | 15  |
| 36 | 30 | 32 | 41  | 48  | 44  | 42  | 34  | 35  | 37  |
| 22 | 15 | 18 | 40  | 52  | 61  | 46  | 40  | 51  | 23  |
| 40 | 35 | 43 | 259 | 402 | 283 | 315 | 295 | 294 | 123 |
| 20 | 21 | 24 | 76  | 104 | 104 | 68  | 66  | 91  | 32  |
| 38 | 35 | 46 | 71  | 81  | 74  | 77  | 54  | 72  | 37  |
| 62 | 66 | 69 | 54  | 84  | 84  | 73  | 69  | 72  | 52  |
| 43 | 50 | 45 | 65  | 78  | 92  | 69  | 52  | 57  | 51  |
| 32 | 42 | 37 | 28  | 42  | 39  | 24  | 25  | 33  | 38  |
| 14 | 21 | 15 | 46  | 57  | 62  | 31  | 31  | 38  | 23  |
| 32 | 23 | 50 | 50  | 56  | 50  | 36  | 23  | 27  | 28  |
| 47 | 53 | 56 | 85  | 118 | 82  | 83  | 76  | 104 | 71  |
| 44 | 28 | 39 | 132 | 163 | 149 | 96  | 70  | 79  | 67  |
| 44 | 58 | 54 | 23  | 41  | 44  | 32  | 33  | 41  | 39  |
| 24 | 31 | 19 | 49  | 90  | 79  | 40  | 44  | 29  | 18  |
| 34 | 40 | 54 | 29  | 48  | 31  | 35  | 26  | 22  | 37  |
| 39 | 30 | 44 | 59  | 89  | 74  | 59  | 32  | 48  | 40  |
| 67 | 76 | 63 | 149 | 184 | 132 | 124 | 98  | 124 | 74  |
| 31 | 40 | 36 | 92  | 91  | 85  | 65  | 57  | 56  | 45  |
| 74 | 74 | 66 | 93  | 117 | 122 | 99  | 113 | 104 | 74  |
| 90 | 78 | 92 | 133 | 168 | 141 | 124 | 122 | 140 | 68  |
| 39 | 40 | 42 | 67  | 91  | 76  | 63  | 53  | 52  | 40  |
| 61 | 66 | 61 | 57  | 99  | 89  | 95  | 83  | 100 | 58  |
| 17 | 22 | 24 | 36  | 52  | 38  | 30  | 20  | 28  | 22  |
| 39 | 28 | 30 | 50  | 54  | 65  | 37  | 38  | 48  | 38  |
| 25 | 28 | 37 | 47  | 54  | 45  | 31  | 26  | 25  | 42  |
| 19 | 31 | 15 | 28  | 29  | 28  | 24  | 25  | 20  | 18  |
| 29 | 34 | 32 | 69  | 130 | 68  | 77  | 57  | 62  | 31  |

|    |    |    |     |     |     |     |     |     |     |
|----|----|----|-----|-----|-----|-----|-----|-----|-----|
| 5  | 5  | 4  | 5   | 6   | 6   | 1   | 6   | 2   | 7   |
| 5  | 5  | 8  | 13  | 12  | 9   | 9   | 12  | 7   | 9   |
| 13 | 19 | 24 | 36  | 48  | 47  | 28  | 21  | 32  | 32  |
| 36 | 32 | 41 | 46  | 43  | 40  | 39  | 25  | 38  | 30  |
| 40 | 48 | 39 | 35  | 28  | 30  | 49  | 38  | 38  | 46  |
| 43 | 47 | 52 | 178 | 218 | 228 | 122 | 135 | 122 | 67  |
| 53 | 52 | 62 | 119 | 124 | 118 | 134 | 109 | 136 | 88  |
| 22 | 34 | 29 | 65  | 71  | 73  | 48  | 41  | 45  | 38  |
| 31 | 43 | 27 | 44  | 66  | 45  | 51  | 51  | 56  | 36  |
| 23 | 20 | 20 | 50  | 51  | 55  | 51  | 37  | 48  | 24  |
| 45 | 44 | 67 | 111 | 158 | 123 | 132 | 92  | 117 | 51  |
| 31 | 48 | 36 | 46  | 45  | 39  | 26  | 45  | 38  | 45  |
| 45 | 45 | 60 | 24  | 22  | 17  | 16  | 14  | 15  | 46  |
| 56 | 55 | 73 | 74  | 102 | 109 | 115 | 117 | 126 | 56  |
| 43 | 53 | 55 | 51  | 48  | 61  | 41  | 42  | 52  | 43  |
| 71 | 47 | 56 | 48  | 80  | 48  | 57  | 48  | 60  | 62  |
| 62 | 77 | 79 | 53  | 57  | 57  | 69  | 63  | 79  | 59  |
| 21 | 39 | 42 | 25  | 40  | 35  | 49  | 55  | 35  | 41  |
| 67 | 75 | 59 | 48  | 78  | 43  | 54  | 60  | 76  | 67  |
| 39 | 57 | 55 | 21  | 37  | 38  | 52  | 27  | 51  | 50  |
| 57 | 58 | 54 | 47  | 59  | 70  | 92  | 81  | 81  | 61  |
| 54 | 43 | 49 | 39  | 41  | 47  | 56  | 44  | 45  | 48  |
| 36 | 37 | 23 | 37  | 51  | 36  | 41  | 36  | 34  | 37  |
| 76 | 76 | 69 | 68  | 93  | 81  | 69  | 82  | 80  | 60  |
| 31 | 29 | 38 | 36  | 54  | 48  | 46  | 34  | 34  | 31  |
| 20 | 24 | 37 | 49  | 48  | 46  | 39  | 20  | 35  | 22  |
| 44 | 16 | 46 | 53  | 67  | 49  | 41  | 39  | 60  | 38  |
| 42 | 37 | 36 | 37  | 44  | 39  | 36  | 26  | 41  | 31  |
| 78 | 75 | 77 | 79  | 119 | 90  | 120 | 96  | 110 | 77  |
| 23 | 33 | 24 | 16  | 28  | 28  | 18  | 18  | 22  | 26  |
| 40 | 32 | 26 | 38  | 44  | 32  | 40  | 31  | 39  | 33  |
| 22 | 28 | 30 | 35  | 46  | 38  | 44  | 29  | 49  | 37  |
| 33 | 35 | 35 | 59  | 54  | 51  | 49  | 35  | 31  | 32  |
| 16 | 20 | 17 | 34  | 47  | 40  | 35  | 36  | 50  | 41  |
| 52 | 41 | 46 | 69  | 81  | 62  | 65  | 54  | 66  | 51  |
| 23 | 30 | 49 | 163 | 216 | 178 | 126 | 126 | 129 | 69  |
| 16 | 13 | 15 | 16  | 30  | 23  | 14  | 9   | 20  | 19  |
| 86 | 85 | 82 | 428 | 566 | 457 | 277 | 255 | 281 | 139 |
| 23 | 22 | 29 | 20  | 16  | 33  | 21  | 19  | 19  | 18  |
| 19 | 20 | 19 | 12  | 9   | 11  | 10  | 6   | 15  | 9   |
| 32 | 25 | 43 | 21  | 22  | 21  | 41  | 24  | 38  | 28  |

|     |     |     |     |     |     |     |     |     |     |
|-----|-----|-----|-----|-----|-----|-----|-----|-----|-----|
| 50  | 56  | 58  | 47  | 71  | 70  | 48  | 45  | 46  | 32  |
| 37  | 22  | 26  | 37  | 45  | 36  | 26  | 22  | 32  | 32  |
| 8   | 14  | 10  | 8   | 10  | 14  | 14  | 12  | 12  | 13  |
| 24  | 18  | 25  | 12  | 23  | 16  | 18  | 23  | 23  | 29  |
| 34  | 37  | 48  | 35  | 40  | 36  | 45  | 36  | 47  | 37  |
| 28  | 28  | 22  | 8   | 10  | 14  | 14  | 22  | 16  | 15  |
| 36  | 49  | 47  | 51  | 66  | 57  | 59  | 34  | 51  | 48  |
| 63  | 56  | 63  | 77  | 107 | 70  | 108 | 106 | 108 | 60  |
| 53  | 53  | 51  | 66  | 62  | 65  | 47  | 50  | 46  | 33  |
| 119 | 84  | 110 | 226 | 297 | 231 | 275 | 244 | 292 | 112 |
| 25  | 19  | 28  | 41  | 50  | 49  | 45  | 40  | 49  | 38  |
| 74  | 83  | 86  | 133 | 179 | 162 | 170 | 161 | 161 | 88  |
| 55  | 76  | 71  | 387 | 567 | 420 | 602 | 533 | 567 | 254 |
| 44  | 40  | 38  | 122 | 121 | 102 | 87  | 59  | 88  | 40  |
| 67  | 65  | 64  | 285 | 429 | 343 | 432 | 350 | 365 | 186 |
| 99  | 91  | 99  | 94  | 111 | 107 | 117 | 131 | 125 | 81  |
| 30  | 18  | 28  | 25  | 31  | 23  | 22  | 27  | 23  | 24  |
| 10  | 5   | 9   | 17  | 16  | 19  | 23  | 24  | 20  | 17  |
| 55  | 38  | 30  | 42  | 50  | 49  | 39  | 41  | 39  | 32  |
| 34  | 31  | 48  | 71  | 88  | 81  | 73  | 65  | 72  | 42  |
| 22  | 19  | 19  | 32  | 27  | 22  | 23  | 10  | 23  | 20  |
| 115 | 117 | 92  | 199 | 249 | 221 | 216 | 193 | 202 | 117 |
| 58  | 45  | 50  | 81  | 86  | 66  | 66  | 54  | 62  | 41  |
| 43  | 54  | 47  | 129 | 157 | 154 | 92  | 99  | 100 | 56  |
| 23  | 42  | 43  | 41  | 48  | 40  | 38  | 32  | 45  | 38  |
| 46  | 39  | 40  | 131 | 148 | 130 | 93  | 78  | 94  | 46  |
| 100 | 92  | 82  | 103 | 130 | 117 | 109 | 116 | 112 | 99  |
| 19  | 13  | 21  | 49  | 57  | 50  | 47  | 43  | 46  | 26  |
| 63  | 55  | 53  | 97  | 128 | 103 | 94  | 70  | 78  | 50  |
| 39  | 40  | 52  | 192 | 246 | 226 | 174 | 158 | 156 | 72  |
| 25  | 28  | 23  | 100 | 144 | 104 | 50  | 40  | 52  | 24  |
| 12  | 8   | 3   | 24  | 23  | 24  | 23  | 18  | 19  | 11  |
| 26  | 33  | 35  | 72  | 85  | 65  | 42  | 37  | 48  | 25  |
| 37  | 45  | 52  | 75  | 127 | 81  | 78  | 56  | 76  | 46  |
| 30  | 35  | 38  | 51  | 62  | 54  | 41  | 33  | 42  | 32  |
| 18  | 18  | 14  | 42  | 35  | 29  | 27  | 22  | 26  | 12  |
| 20  | 30  | 36  | 45  | 71  | 62  | 58  | 57  | 80  | 40  |
| 15  | 15  | 16  | 29  | 29  | 25  | 26  | 18  | 31  | 20  |
| 60  | 50  | 63  | 57  | 66  | 59  | 76  | 60  | 78  | 47  |
| 29  | 14  | 22  | 24  | 26  | 28  | 25  | 21  | 23  | 21  |
| 67  | 76  | 62  | 87  | 78  | 90  | 87  | 67  | 79  | 65  |

|     |     |     |     |     |     |     |     |     |     |
|-----|-----|-----|-----|-----|-----|-----|-----|-----|-----|
| 69  | 84  | 81  | 77  | 101 | 88  | 74  | 60  | 82  | 55  |
| 52  | 68  | 62  | 70  | 121 | 86  | 116 | 89  | 101 | 55  |
| 62  | 55  | 57  | 92  | 117 | 116 | 111 | 106 | 138 | 71  |
| 45  | 51  | 34  | 38  | 56  | 49  | 49  | 42  | 47  | 33  |
| 41  | 39  | 60  | 43  | 53  | 43  | 52  | 60  | 44  | 47  |
| 33  | 34  | 32  | 21  | 35  | 14  | 10  | 12  | 13  | 20  |
| 23  | 20  | 17  | 21  | 36  | 31  | 21  | 26  | 31  | 24  |
| 14  | 21  | 25  | 19  | 30  | 29  | 25  | 31  | 19  | 17  |
| 61  | 70  | 61  | 91  | 119 | 89  | 77  | 56  | 72  | 49  |
| 73  | 57  | 66  | 73  | 66  | 49  | 60  | 54  | 47  | 50  |
| 53  | 40  | 50  | 53  | 51  | 61  | 42  | 44  | 42  | 50  |
| 107 | 111 | 109 | 98  | 114 | 86  | 156 | 150 | 178 | 117 |
| 31  | 31  | 29  | 35  | 34  | 34  | 35  | 28  | 25  | 29  |
| 33  | 28  | 36  | 28  | 23  | 19  | 27  | 15  | 24  | 27  |
| 32  | 40  | 49  | 53  | 70  | 52  | 59  | 51  | 41  | 40  |
| 36  | 33  | 32  | 19  | 32  | 20  | 38  | 29  | 33  | 26  |
| 85  | 78  | 84  | 143 | 147 | 130 | 176 | 140 | 164 | 89  |
| 45  | 48  | 50  | 31  | 46  | 36  | 59  | 45  | 37  | 40  |
| 64  | 50  | 64  | 102 | 113 | 106 | 101 | 83  | 108 | 66  |
| 36  | 44  | 39  | 33  | 48  | 29  | 31  | 37  | 41  | 31  |
| 30  | 25  | 39  | 22  | 34  | 21  | 22  | 16  | 15  | 16  |
| 21  | 36  | 30  | 15  | 30  | 25  | 18  | 19  | 21  | 23  |
| 66  | 74  | 82  | 83  | 122 | 109 | 166 | 121 | 125 | 99  |
| 68  | 79  | 83  | 199 | 241 | 226 | 316 | 284 | 303 | 148 |
| 25  | 21  | 18  | 37  | 59  | 46  | 41  | 49  | 59  | 24  |
| 45  | 46  | 66  | 57  | 81  | 75  | 94  | 111 | 98  | 55  |
| 101 | 76  | 80  | 91  | 132 | 114 | 70  | 81  | 74  | 66  |
| 68  | 81  | 63  | 83  | 114 | 98  | 101 | 95  | 107 | 65  |
| 71  | 72  | 80  | 76  | 90  | 72  | 147 | 132 | 147 | 96  |
| 15  | 11  | 6   | 5   | 3   | 9   | 5   | 7   | 5   | 10  |
| 62  | 58  | 47  | 66  | 91  | 70  | 90  | 89  | 80  | 58  |
| 98  | 127 | 136 | 68  | 77  | 62  | 103 | 100 | 121 | 83  |
| 45  | 52  | 59  | 115 | 111 | 107 | 93  | 66  | 94  | 56  |
| 83  | 90  | 89  | 86  | 144 | 104 | 143 | 160 | 186 | 91  |
| 43  | 51  | 52  | 73  | 97  | 79  | 88  | 59  | 58  | 53  |
| 40  | 33  | 48  | 59  | 93  | 59  | 57  | 60  | 65  | 37  |
| 54  | 43  | 59  | 26  | 51  | 42  | 35  | 32  | 46  | 41  |
| 24  | 21  | 24  | 18  | 18  | 15  | 15  | 12  | 14  | 13  |
| 54  | 47  | 45  | 33  | 57  | 26  | 30  | 30  | 22  | 29  |
| 23  | 19  | 33  | 17  | 29  | 18  | 44  | 24  | 28  | 20  |
| 19  | 30  | 24  | 14  | 23  | 19  | 17  | 8   | 13  | 10  |

|     |     |     |     |     |     |     |     |     |     |
|-----|-----|-----|-----|-----|-----|-----|-----|-----|-----|
| 18  | 25  | 33  | 16  | 18  | 15  | 16  | 17  | 10  | 14  |
| 78  | 86  | 96  | 42  | 59  | 56  | 52  | 64  | 66  | 45  |
| 56  | 36  | 47  | 45  | 48  | 51  | 41  | 32  | 41  | 31  |
| 28  | 28  | 39  | 15  | 18  | 16  | 11  | 9   | 14  | 17  |
| 23  | 24  | 15  | 16  | 28  | 24  | 10  | 9   | 14  | 14  |
| 40  | 30  | 37  | 20  | 33  | 23  | 23  | 24  | 24  | 29  |
| 49  | 42  | 49  | 37  | 48  | 44  | 45  | 41  | 36  | 45  |
| 68  | 62  | 77  | 73  | 118 | 95  | 91  | 86  | 100 | 52  |
| 16  | 10  | 17  | 6   | 11  | 6   | 11  | 14  | 10  | 15  |
| 47  | 36  | 27  | 44  | 39  | 48  | 34  | 32  | 22  | 27  |
| 9   | 11  | 13  | 4   | 5   | 1   | 1   | 3   | 6   | 9   |
| 22  | 30  | 32  | 14  | 13  | 23  | 16  | 12  | 25  | 24  |
| 16  | 14  | 18  | 14  | 19  | 19  | 7   | 4   | 15  | 14  |
| 22  | 32  | 29  | 9   | 11  | 6   | 21  | 12  | 12  | 19  |
| 28  | 28  | 23  | 6   | 14  | 15  | 14  | 14  | 12  | 22  |
| 18  | 13  | 30  | 14  | 18  | 18  | 12  | 9   | 10  | 22  |
| 45  | 60  | 52  | 70  | 90  | 79  | 122 | 89  | 94  | 50  |
| 45  | 44  | 64  | 198 | 219 | 197 | 221 | 220 | 244 | 102 |
| 29  | 43  | 43  | 54  | 88  | 74  | 80  | 70  | 84  | 44  |
| 36  | 48  | 47  | 30  | 47  | 51  | 55  | 26  | 48  | 41  |
| 41  | 55  | 45  | 79  | 114 | 91  | 60  | 66  | 63  | 51  |
| 44  | 45  | 43  | 131 | 160 | 124 | 85  | 70  | 87  | 58  |
| 30  | 44  | 77  | 82  | 113 | 96  | 100 | 97  | 106 | 49  |
| 47  | 35  | 51  | 89  | 143 | 72  | 78  | 55  | 65  | 44  |
| 68  | 60  | 61  | 112 | 134 | 127 | 164 | 153 | 184 | 86  |
| 43  | 53  | 51  | 107 | 176 | 155 | 131 | 105 | 131 | 64  |
| 90  | 96  | 85  | 209 | 283 | 258 | 290 | 244 | 287 | 148 |
| 74  | 75  | 79  | 315 | 400 | 353 | 371 | 352 | 339 | 154 |
| 45  | 52  | 49  | 129 | 201 | 161 | 139 | 117 | 133 | 74  |
| 56  | 54  | 56  | 78  | 109 | 89  | 86  | 77  | 92  | 49  |
| 33  | 41  | 32  | 68  | 90  | 84  | 83  | 66  | 83  | 37  |
| 39  | 49  | 41  | 139 | 173 | 162 | 150 | 154 | 162 | 78  |
| 66  | 64  | 53  | 87  | 111 | 97  | 123 | 111 | 142 | 74  |
| 55  | 43  | 56  | 56  | 66  | 62  | 70  | 60  | 57  | 57  |
| 13  | 18  | 23  | 18  | 19  | 17  | 14  | 13  | 18  | 9   |
| 54  | 68  | 68  | 78  | 78  | 79  | 61  | 68  | 49  | 46  |
| 15  | 22  | 16  | 6   | 10  | 12  | 11  | 8   | 7   | 18  |
| 47  | 43  | 41  | 49  | 68  | 49  | 40  | 28  | 33  | 34  |
| 107 | 108 | 109 | 66  | 100 | 83  | 69  | 79  | 68  | 57  |
| 108 | 114 | 136 | 28  | 39  | 35  | 37  | 57  | 44  | 51  |
| 41  | 42  | 49  | 61  | 68  | 71  | 55  | 55  | 52  | 38  |



|     |     |     |     |     |     |     |     |     |     |
|-----|-----|-----|-----|-----|-----|-----|-----|-----|-----|
| 31  | 44  | 52  | 45  | 81  | 69  | 57  | 54  | 57  | 44  |
| 52  | 53  | 63  | 71  | 71  | 67  | 64  | 49  | 49  | 47  |
| 47  | 53  | 52  | 70  | 74  | 64  | 79  | 75  | 62  | 60  |
| 34  | 32  | 23  | 21  | 15  | 16  | 21  | 19  | 16  | 24  |
| 43  | 50  | 51  | 56  | 82  | 53  | 44  | 47  | 70  | 44  |
| 50  | 37  | 37  | 42  | 40  | 38  | 31  | 33  | 33  | 18  |
| 55  | 46  | 69  | 122 | 175 | 139 | 143 | 114 | 124 | 74  |
| 26  | 29  | 28  | 36  | 48  | 39  | 37  | 25  | 19  | 25  |
| 28  | 36  | 46  | 44  | 48  | 49  | 26  | 34  | 29  | 23  |
| 42  | 35  | 33  | 23  | 32  | 28  | 24  | 26  | 24  | 26  |
| 43  | 51  | 57  | 77  | 83  | 87  | 70  | 70  | 89  | 42  |
| 33  | 33  | 33  | 51  | 63  | 45  | 40  | 32  | 38  | 24  |
| 50  | 70  | 71  | 111 | 139 | 123 | 97  | 79  | 78  | 71  |
| 69  | 66  | 71  | 42  | 51  | 63  | 97  | 88  | 93  | 65  |
| 30  | 27  | 38  | 47  | 52  | 55  | 49  | 40  | 51  | 26  |
| 33  | 30  | 33  | 33  | 45  | 29  | 26  | 33  | 37  | 22  |
| 19  | 24  | 36  | 14  | 23  | 22  | 12  | 17  | 16  | 15  |
| 27  | 19  | 31  | 25  | 25  | 24  | 29  | 20  | 19  | 25  |
| 12  | 15  | 18  | 19  | 12  | 16  | 11  | 10  | 5   | 10  |
| 31  | 33  | 39  | 31  | 46  | 40  | 38  | 28  | 32  | 33  |
| 12  | 14  | 21  | 22  | 15  | 19  | 22  | 15  | 21  | 17  |
| 43  | 47  | 37  | 59  | 69  | 81  | 61  | 59  | 52  | 44  |
| 39  | 31  | 40  | 107 | 137 | 131 | 157 | 120 | 148 | 56  |
| 33  | 39  | 28  | 44  | 47  | 38  | 37  | 30  | 30  | 27  |
| 12  | 14  | 16  | 31  | 31  | 26  | 19  | 29  | 18  | 16  |
| 38  | 36  | 36  | 39  | 51  | 38  | 49  | 38  | 57  | 30  |
| 82  | 93  | 90  | 99  | 130 | 115 | 175 | 186 | 204 | 109 |
| 53  | 59  | 44  | 48  | 88  | 61  | 90  | 81  | 85  | 50  |
| 45  | 37  | 37  | 27  | 38  | 47  | 36  | 22  | 31  | 25  |
| 7   | 1   | 4   | 1   | 5   | 5   | 1   | 3   | 4   | 4   |
| 35  | 37  | 35  | 40  | 45  | 36  | 30  | 22  | 26  | 40  |
| 65  | 56  | 84  | 150 | 228 | 189 | 141 | 139 | 125 | 84  |
| 66  | 42  | 51  | 56  | 63  | 68  | 51  | 41  | 33  | 34  |
| 59  | 62  | 68  | 109 | 171 | 136 | 126 | 84  | 91  | 73  |
| 68  | 71  | 83  | 368 | 524 | 448 | 511 | 407 | 486 | 238 |
| 51  | 56  | 54  | 53  | 75  | 71  | 73  | 65  | 73  | 49  |
| 53  | 54  | 59  | 41  | 39  | 67  | 57  | 48  | 39  | 52  |
| 30  | 54  | 55  | 43  | 49  | 39  | 49  | 46  | 35  | 34  |
| 40  | 32  | 26  | 17  | 19  | 35  | 22  | 31  | 33  | 37  |
| 105 | 122 | 133 | 71  | 84  | 105 | 75  | 88  | 77  | 99  |
| 77  | 78  | 82  | 105 | 155 | 108 | 112 | 109 | 124 | 86  |

|     |     |     |     |     |     |     |     |     |     |
|-----|-----|-----|-----|-----|-----|-----|-----|-----|-----|
| 46  | 54  | 46  | 70  | 62  | 55  | 47  | 39  | 35  | 56  |
| 79  | 82  | 82  | 222 | 261 | 264 | 322 | 284 | 318 | 146 |
| 54  | 41  | 46  | 46  | 37  | 34  | 53  | 44  | 43  | 38  |
| 99  | 92  | 110 | 125 | 172 | 146 | 142 | 170 | 190 | 106 |
| 138 | 154 | 182 | 180 | 254 | 219 | 174 | 142 | 168 | 152 |
| 20  | 25  | 20  | 22  | 14  | 16  | 14  | 14  | 18  | 16  |
| 0   | 2   | 2   | 12  | 17  | 14  | 7   | 4   | 6   | 0   |
| 34  | 59  | 38  | 105 | 110 | 87  | 89  | 93  | 84  | 36  |
| 24  | 36  | 41  | 30  | 32  | 31  | 21  | 19  | 29  | 25  |
| 21  | 24  | 24  | 17  | 18  | 13  | 21  | 7   | 19  | 14  |
| 11  | 17  | 22  | 38  | 51  | 37  | 26  | 25  | 19  | 24  |
| 36  | 38  | 28  | 62  | 69  | 52  | 42  | 35  | 48  | 30  |
| 22  | 24  | 20  | 21  | 40  | 29  | 31  | 29  | 34  | 24  |
| 20  | 20  | 12  | 26  | 40  | 28  | 25  | 28  | 31  | 16  |
| 33  | 34  | 27  | 32  | 29  | 30  | 35  | 16  | 25  | 30  |
| 85  | 91  | 102 | 28  | 47  | 43  | 49  | 45  | 51  | 71  |
| 39  | 37  | 56  | 53  | 57  | 55  | 55  | 46  | 52  | 37  |
| 36  | 27  | 33  | 34  | 45  | 42  | 33  | 27  | 35  | 35  |
| 37  | 40  | 46  | 30  | 34  | 25  | 44  | 29  | 34  | 31  |
| 58  | 67  | 46  | 70  | 70  | 72  | 88  | 73  | 68  | 44  |
| 39  | 32  | 39  | 69  | 109 | 96  | 85  | 101 | 112 | 71  |
| 39  | 36  | 45  | 34  | 45  | 33  | 28  | 27  | 16  | 19  |
| 27  | 43  | 32  | 24  | 26  | 29  | 21  | 23  | 22  | 19  |
| 33  | 34  | 34  | 50  | 50  | 30  | 19  | 24  | 36  | 25  |
| 23  | 23  | 17  | 34  | 56  | 52  | 29  | 21  | 26  | 23  |
| 42  | 39  | 33  | 50  | 58  | 46  | 29  | 33  | 31  | 33  |
| 19  | 27  | 19  | 52  | 58  | 37  | 35  | 28  | 44  | 21  |
| 83  | 92  | 108 | 61  | 68  | 56  | 64  | 47  | 52  | 36  |
| 44  | 37  | 35  | 71  | 98  | 59  | 80  | 54  | 59  | 52  |
| 65  | 61  | 72  | 55  | 58  | 52  | 43  | 40  | 51  | 35  |
| 33  | 37  | 32  | 50  | 50  | 51  | 49  | 44  | 55  | 32  |
| 71  | 76  | 67  | 146 | 147 | 150 | 126 | 95  | 131 | 62  |
| 85  | 92  | 97  | 86  | 96  | 84  | 72  | 69  | 84  | 43  |
| 89  | 77  | 83  | 178 | 198 | 161 | 136 | 124 | 113 | 67  |
| 53  | 61  | 72  | 73  | 80  | 73  | 48  | 48  | 50  | 32  |
| 43  | 49  | 39  | 53  | 41  | 40  | 24  | 22  | 48  | 24  |
| 30  | 38  | 37  | 63  | 61  | 56  | 35  | 44  | 48  | 36  |
| 44  | 44  | 33  | 49  | 56  | 48  | 67  | 62  | 46  | 35  |
| 39  | 37  | 26  | 59  | 66  | 60  | 43  | 51  | 43  | 35  |
| 42  | 53  | 55  | 127 | 178 | 148 | 152 | 165 | 168 | 78  |
| 43  | 48  | 48  | 94  | 114 | 103 | 73  | 97  | 115 | 52  |

|     |     |     |     |     |     |     |     |     |     |
|-----|-----|-----|-----|-----|-----|-----|-----|-----|-----|
| 15  | 16  | 34  | 29  | 41  | 43  | 22  | 34  | 24  | 31  |
| 40  | 31  | 55  | 51  | 75  | 57  | 46  | 44  | 44  | 31  |
| 51  | 52  | 52  | 101 | 119 | 99  | 92  | 68  | 93  | 56  |
| 23  | 19  | 25  | 35  | 37  | 28  | 28  | 13  | 26  | 17  |
| 34  | 26  | 36  | 81  | 80  | 94  | 71  | 43  | 60  | 33  |
| 22  | 16  | 32  | 47  | 50  | 52  | 25  | 30  | 33  | 35  |
| 26  | 36  | 34  | 44  | 58  | 65  | 46  | 62  | 68  | 33  |
| 50  | 49  | 49  | 68  | 85  | 81  | 59  | 57  | 85  | 43  |
| 34  | 43  | 56  | 77  | 96  | 50  | 66  | 66  | 51  | 43  |
| 39  | 33  | 30  | 47  | 61  | 47  | 48  | 47  | 41  | 28  |
| 34  | 46  | 50  | 32  | 40  | 42  | 27  | 35  | 33  | 25  |
| 26  | 32  | 31  | 44  | 57  | 54  | 48  | 16  | 31  | 22  |
| 117 | 106 | 113 | 61  | 95  | 80  | 64  | 51  | 65  | 50  |
| 23  | 34  | 44  | 21  | 54  | 44  | 27  | 28  | 22  | 30  |
| 42  | 36  | 51  | 89  | 111 | 92  | 100 | 74  | 84  | 52  |
| 48  | 51  | 46  | 81  | 139 | 114 | 81  | 62  | 84  | 51  |
| 64  | 63  | 62  | 71  | 101 | 70  | 66  | 48  | 64  | 30  |
| 93  | 89  | 84  | 110 | 133 | 143 | 101 | 91  | 92  | 74  |
| 71  | 91  | 95  | 147 | 191 | 170 | 188 | 194 | 193 | 113 |
| 44  | 25  | 41  | 94  | 116 | 87  | 75  | 74  | 67  | 29  |
| 21  | 12  | 24  | 44  | 48  | 42  | 67  | 60  | 62  | 26  |
| 38  | 45  | 33  | 51  | 52  | 49  | 45  | 40  | 43  | 36  |
| 34  | 36  | 35  | 91  | 106 | 82  | 76  | 64  | 89  | 40  |
| 35  | 25  | 28  | 47  | 70  | 50  | 39  | 51  | 60  | 26  |
| 19  | 27  | 23  | 53  | 79  | 55  | 56  | 52  | 69  | 41  |
| 19  | 20  | 20  | 38  | 79  | 53  | 64  | 47  | 46  | 36  |
| 37  | 32  | 27  | 59  | 62  | 53  | 59  | 37  | 58  | 33  |
| 23  | 24  | 31  | 42  | 68  | 52  | 69  | 62  | 69  | 43  |
| 105 | 92  | 96  | 113 | 127 | 105 | 101 | 91  | 90  | 68  |
| 26  | 17  | 20  | 54  | 77  | 68  | 61  | 52  | 84  | 43  |
| 33  | 27  | 34  | 49  | 66  | 56  | 63  | 57  | 67  | 46  |
| 36  | 53  | 46  | 61  | 70  | 73  | 65  | 71  | 55  | 48  |
| 51  | 82  | 65  | 74  | 98  | 92  | 60  | 28  | 49  | 56  |
| 121 | 154 | 150 | 244 | 294 | 288 | 502 | 451 | 475 | 266 |
| 51  | 34  | 52  | 310 | 381 | 341 | 243 | 216 | 253 | 115 |
| 88  | 75  | 82  | 73  | 83  | 75  | 90  | 72  | 99  | 69  |
| 81  | 80  | 84  | 166 | 198 | 137 | 205 | 205 | 200 | 121 |
| 67  | 70  | 72  | 123 | 234 | 154 | 142 | 118 | 138 | 79  |
| 50  | 70  | 71  | 91  | 122 | 92  | 125 | 116 | 108 | 64  |
| 76  | 73  | 78  | 143 | 177 | 161 | 140 | 136 | 141 | 100 |
| 33  | 28  | 33  | 94  | 135 | 88  | 104 | 76  | 86  | 49  |

|     |     |     |     |     |     |     |     |     |     |
|-----|-----|-----|-----|-----|-----|-----|-----|-----|-----|
| 52  | 64  | 82  | 175 | 254 | 194 | 176 | 145 | 181 | 102 |
| 64  | 60  | 58  | 138 | 186 | 158 | 140 | 143 | 138 | 103 |
| 45  | 59  | 71  | 111 | 152 | 108 | 123 | 99  | 121 | 68  |
| 37  | 35  | 42  | 85  | 93  | 96  | 97  | 103 | 81  | 52  |
| 53  | 33  | 63  | 87  | 106 | 84  | 110 | 91  | 121 | 54  |
| 22  | 16  | 12  | 7   | 21  | 21  | 34  | 30  | 32  | 18  |
| 41  | 29  | 46  | 64  | 87  | 81  | 59  | 88  | 64  | 45  |
| 33  | 49  | 45  | 147 | 173 | 177 | 147 | 140 | 176 | 79  |
| 41  | 38  | 48  | 68  | 68  | 74  | 83  | 62  | 72  | 51  |
| 38  | 43  | 29  | 80  | 84  | 73  | 76  | 57  | 75  | 38  |
| 47  | 48  | 40  | 118 | 126 | 138 | 113 | 110 | 124 | 66  |
| 120 | 129 | 152 | 170 | 198 | 179 | 209 | 182 | 164 | 118 |
| 77  | 86  | 97  | 116 | 124 | 100 | 139 | 114 | 173 | 85  |
| 63  | 51  | 63  | 87  | 125 | 94  | 92  | 107 | 90  | 69  |
| 24  | 22  | 20  | 32  | 43  | 35  | 36  | 32  | 22  | 26  |
| 12  | 13  | 13  | 53  | 83  | 53  | 80  | 47  | 47  | 31  |
| 28  | 30  | 26  | 150 | 185 | 153 | 179 | 156 | 170 | 102 |
| 44  | 45  | 53  | 79  | 95  | 62  | 99  | 82  | 102 | 55  |
| 31  | 32  | 21  | 21  | 13  | 29  | 30  | 34  | 19  | 31  |
| 45  | 40  | 55  | 52  | 70  | 73  | 58  | 69  | 58  | 53  |
| 58  | 69  | 96  | 83  | 99  | 69  | 116 | 85  | 77  | 66  |
| 80  | 112 | 99  | 401 | 529 | 475 | 448 | 414 | 459 | 224 |
| 14  | 23  | 21  | 43  | 52  | 38  | 48  | 53  | 35  | 30  |
| 69  | 80  | 77  | 82  | 111 | 80  | 102 | 100 | 95  | 58  |
| 32  | 26  | 32  | 66  | 76  | 59  | 80  | 74  | 81  | 49  |
| 35  | 46  | 32  | 52  | 76  | 65  | 49  | 55  | 53  | 40  |
| 45  | 48  | 55  | 74  | 88  | 91  | 69  | 103 | 86  | 66  |
| 73  | 75  | 73  | 107 | 151 | 124 | 128 | 135 | 140 | 83  |
| 38  | 48  | 41  | 61  | 77  | 75  | 65  | 55  | 59  | 58  |
| 59  | 68  | 69  | 68  | 91  | 80  | 74  | 66  | 81  | 55  |
| 41  | 45  | 44  | 59  | 76  | 63  | 66  | 57  | 60  | 37  |
| 21  | 34  | 34  | 65  | 63  | 63  | 73  | 54  | 62  | 38  |
| 135 | 117 | 151 | 150 | 181 | 174 | 167 | 148 | 155 | 93  |
| 43  | 56  | 59  | 59  | 79  | 58  | 52  | 60  | 71  | 51  |
| 68  | 74  | 77  | 81  | 95  | 79  | 104 | 95  | 98  | 65  |
| 24  | 24  | 33  | 31  | 46  | 41  | 29  | 25  | 33  | 25  |
| 14  | 11  | 9   | 10  | 14  | 9   | 15  | 9   | 12  | 11  |
| 7   | 11  | 9   | 15  | 26  | 23  | 23  | 13  | 14  | 10  |
| 53  | 47  | 55  | 53  | 57  | 67  | 61  | 56  | 58  | 39  |
| 34  | 39  | 41  | 39  | 33  | 29  | 30  | 25  | 36  | 31  |
| 32  | 30  | 32  | 34  | 43  | 35  | 37  | 34  | 42  | 37  |

|     |     |     |     |     |     |     |     |     |     |
|-----|-----|-----|-----|-----|-----|-----|-----|-----|-----|
| 41  | 31  | 42  | 59  | 63  | 63  | 47  | 43  | 39  | 34  |
| 41  | 39  | 32  | 70  | 79  | 80  | 67  | 70  | 74  | 39  |
| 13  | 16  | 16  | 20  | 19  | 17  | 20  | 11  | 20  | 16  |
| 40  | 33  | 33  | 74  | 83  | 64  | 61  | 63  | 68  | 32  |
| 15  | 13  | 15  | 16  | 26  | 12  | 21  | 17  | 16  | 11  |
| 46  | 29  | 34  | 28  | 33  | 22  | 42  | 20  | 36  | 30  |
| 12  | 11  | 15  | 27  | 25  | 21  | 20  | 12  | 14  | 12  |
| 49  | 49  | 45  | 43  | 38  | 41  | 45  | 36  | 37  | 39  |
| 146 | 113 | 169 | 89  | 91  | 79  | 106 | 92  | 94  | 105 |
| 57  | 54  | 49  | 77  | 92  | 110 | 86  | 97  | 97  | 63  |
| 13  | 22  | 32  | 50  | 63  | 55  | 62  | 66  | 58  | 35  |
| 56  | 53  | 47  | 40  | 81  | 49  | 51  | 39  | 39  | 46  |
| 31  | 54  | 61  | 25  | 40  | 29  | 29  | 31  | 32  | 46  |
| 42  | 48  | 55  | 42  | 60  | 61  | 59  | 58  | 42  | 38  |
| 28  | 37  | 40  | 35  | 55  | 40  | 35  | 33  | 35  | 37  |
| 37  | 31  | 35  | 57  | 98  | 73  | 66  | 61  | 65  | 38  |
| 32  | 33  | 48  | 47  | 49  | 25  | 33  | 31  | 36  | 30  |
| 42  | 36  | 46  | 64  | 85  | 78  | 59  | 51  | 67  | 58  |
| 18  | 28  | 34  | 64  | 90  | 76  | 46  | 55  | 56  | 35  |
| 68  | 56  | 56  | 86  | 137 | 113 | 120 | 109 | 107 | 69  |
| 11  | 10  | 16  | 16  | 24  | 16  | 11  | 19  | 31  | 10  |
| 78  | 59  | 74  | 188 | 264 | 229 | 185 | 164 | 178 | 108 |
| 48  | 54  | 52  | 101 | 119 | 110 | 116 | 85  | 106 | 67  |
| 51  | 53  | 69  | 146 | 150 | 149 | 82  | 74  | 92  | 69  |
| 36  | 32  | 59  | 52  | 92  | 53  | 86  | 74  | 80  | 50  |
| 36  | 48  | 45  | 59  | 57  | 58  | 58  | 57  | 50  | 52  |
| 16  | 11  | 7   | 19  | 40  | 18  | 19  | 16  | 19  | 8   |
| 14  | 15  | 18  | 18  | 36  | 26  | 18  | 22  | 17  | 16  |
| 27  | 27  | 23  | 33  | 48  | 49  | 33  | 43  | 41  | 26  |
| 13  | 10  | 14  | 15  | 23  | 24  | 18  | 15  | 13  | 12  |
| 42  | 38  | 30  | 46  | 86  | 52  | 53  | 42  | 39  | 15  |
| 12  | 18  | 12  | 24  | 20  | 24  | 25  | 13  | 23  | 12  |
| 61  | 44  | 50  | 92  | 107 | 97  | 78  | 68  | 74  | 43  |
| 39  | 30  | 42  | 43  | 55  | 49  | 45  | 31  | 31  | 26  |
| 75  | 65  | 77  | 106 | 131 | 108 | 104 | 86  | 92  | 55  |
| 21  | 34  | 32  | 97  | 162 | 89  | 160 | 159 | 136 | 50  |
| 42  | 25  | 34  | 40  | 44  | 43  | 41  | 31  | 31  | 37  |
| 35  | 39  | 44  | 87  | 112 | 103 | 73  | 86  | 79  | 44  |
| 50  | 36  | 51  | 38  | 42  | 38  | 26  | 36  | 47  | 40  |
| 34  | 26  | 34  | 63  | 75  | 64  | 73  | 59  | 63  | 28  |
| 44  | 41  | 40  | 34  | 28  | 33  | 31  | 30  | 40  | 38  |

|     |     |     |     |     |     |     |     |     |     |
|-----|-----|-----|-----|-----|-----|-----|-----|-----|-----|
| 25  | 20  | 15  | 108 | 159 | 142 | 65  | 91  | 96  | 29  |
| 14  | 15  | 19  | 26  | 23  | 18  | 17  | 21  | 24  | 25  |
| 59  | 44  | 46  | 59  | 57  | 49  | 80  | 90  | 99  | 59  |
| 54  | 53  | 51  | 48  | 68  | 63  | 66  | 69  | 71  | 67  |
| 16  | 17  | 17  | 17  | 16  | 24  | 13  | 14  | 18  | 12  |
| 34  | 37  | 42  | 35  | 54  | 55  | 38  | 28  | 35  | 37  |
| 37  | 48  | 39  | 42  | 45  | 48  | 45  | 43  | 43  | 30  |
| 14  | 13  | 17  | 41  | 68  | 44  | 30  | 22  | 24  | 18  |
| 41  | 72  | 63  | 85  | 117 | 90  | 55  | 60  | 73  | 59  |
| 50  | 51  | 51  | 72  | 69  | 67  | 91  | 96  | 88  | 60  |
| 34  | 25  | 26  | 20  | 28  | 23  | 24  | 17  | 17  | 24  |
| 23  | 31  | 37  | 62  | 90  | 72  | 49  | 46  | 39  | 19  |
| 70  | 79  | 84  | 99  | 112 | 102 | 138 | 143 | 132 | 74  |
| 45  | 51  | 54  | 42  | 75  | 34  | 46  | 45  | 66  | 43  |
| 87  | 74  | 79  | 93  | 121 | 114 | 166 | 136 | 174 | 71  |
| 117 | 116 | 112 | 139 | 181 | 167 | 244 | 191 | 246 | 158 |
| 71  | 99  | 88  | 120 | 138 | 117 | 188 | 188 | 188 | 130 |
| 36  | 72  | 88  | 78  | 86  | 82  | 89  | 98  | 110 | 62  |
| 55  | 57  | 60  | 59  | 71  | 68  | 67  | 64  | 64  | 60  |
| 46  | 46  | 48  | 97  | 103 | 96  | 128 | 144 | 144 | 67  |
| 54  | 27  | 40  | 37  | 52  | 44  | 43  | 56  | 40  | 43  |
| 108 | 93  | 126 | 98  | 91  | 89  | 144 | 138 | 117 | 94  |
| 42  | 46  | 50  | 80  | 85  | 73  | 74  | 64  | 67  | 55  |
| 28  | 48  | 49  | 68  | 84  | 51  | 51  | 52  | 41  | 38  |
| 40  | 31  | 43  | 17  | 39  | 36  | 45  | 44  | 43  | 30  |
| 25  | 33  | 32  | 16  | 23  | 17  | 25  | 26  | 22  | 23  |
| 47  | 54  | 66  | 29  | 35  | 35  | 26  | 40  | 44  | 46  |
| 46  | 48  | 42  | 33  | 37  | 20  | 29  | 21  | 24  | 26  |
| 48  | 43  | 46  | 45  | 36  | 40  | 62  | 39  | 45  | 44  |
| 35  | 32  | 26  | 22  | 16  | 12  | 15  | 11  | 24  | 28  |
| 48  | 38  | 41  | 21  | 22  | 24  | 23  | 19  | 21  | 34  |
| 74  | 50  | 49  | 66  | 88  | 77  | 57  | 55  | 55  | 69  |
| 43  | 61  | 55  | 41  | 37  | 38  | 54  | 39  | 28  | 39  |
| 48  | 52  | 39  | 44  | 48  | 46  | 37  | 42  | 40  | 49  |
| 47  | 39  | 56  | 37  | 61  | 44  | 52  | 40  | 46  | 70  |
| 20  | 26  | 17  | 32  | 28  | 24  | 20  | 15  | 24  | 25  |
| 27  | 42  | 33  | 39  | 46  | 33  | 31  | 39  | 32  | 30  |
| 50  | 39  | 51  | 48  | 41  | 36  | 45  | 41  | 32  | 42  |
| 43  | 45  | 48  | 157 | 199 | 151 | 134 | 126 | 140 | 68  |
| 147 | 141 | 179 | 203 | 237 | 210 | 285 | 278 | 284 | 174 |
| 32  | 43  | 51  | 166 | 209 | 202 | 144 | 120 | 173 | 78  |

|     |     |     |     |     |     |     |     |     |     |
|-----|-----|-----|-----|-----|-----|-----|-----|-----|-----|
| 49  | 39  | 65  | 320 | 382 | 291 | 268 | 263 | 265 | 130 |
| 17  | 23  | 20  | 60  | 86  | 44  | 43  | 39  | 54  | 25  |
| 70  | 57  | 57  | 133 | 165 | 147 | 182 | 170 | 172 | 89  |
| 68  | 59  | 67  | 194 | 314 | 228 | 266 | 237 | 268 | 127 |
| 10  | 16  | 8   | 41  | 69  | 32  | 30  | 11  | 23  | 10  |
| 14  | 14  | 14  | 119 | 137 | 96  | 85  | 77  | 75  | 29  |
| 79  | 68  | 78  | 48  | 47  | 47  | 64  | 73  | 74  | 49  |
| 71  | 59  | 76  | 93  | 108 | 96  | 142 | 138 | 166 | 82  |
| 82  | 90  | 100 | 84  | 125 | 85  | 81  | 108 | 102 | 106 |
| 38  | 38  | 37  | 67  | 71  | 76  | 58  | 50  | 55  | 41  |
| 26  | 52  | 41  | 76  | 91  | 84  | 65  | 56  | 71  | 39  |
| 62  | 60  | 75  | 163 | 179 | 188 | 186 | 162 | 197 | 95  |
| 47  | 51  | 48  | 126 | 150 | 125 | 131 | 120 | 130 | 55  |
| 14  | 12  | 15  | 10  | 13  | 10  | 10  | 9   | 10  | 11  |
| 54  | 59  | 64  | 76  | 105 | 96  | 107 | 90  | 96  | 62  |
| 33  | 37  | 45  | 65  | 93  | 86  | 90  | 71  | 78  | 51  |
| 52  | 64  | 62  | 53  | 71  | 66  | 56  | 47  | 53  | 61  |
| 46  | 50  | 64  | 64  | 89  | 62  | 79  | 66  | 61  | 56  |
| 96  | 82  | 114 | 77  | 126 | 101 | 110 | 112 | 125 | 95  |
| 42  | 42  | 37  | 47  | 52  | 49  | 67  | 67  | 80  | 37  |
| 50  | 43  | 41  | 37  | 52  | 49  | 50  | 45  | 55  | 37  |
| 83  | 87  | 84  | 95  | 134 | 131 | 139 | 133 | 128 | 96  |
| 38  | 48  | 36  | 27  | 37  | 21  | 29  | 22  | 39  | 33  |
| 47  | 53  | 59  | 46  | 46  | 64  | 48  | 58  | 44  | 43  |
| 102 | 130 | 156 | 108 | 128 | 115 | 155 | 129 | 164 | 111 |
| 70  | 77  | 69  | 68  | 90  | 83  | 105 | 100 | 95  | 66  |
| 41  | 43  | 42  | 65  | 73  | 82  | 66  | 67  | 82  | 40  |
| 80  | 76  | 106 | 64  | 89  | 85  | 103 | 91  | 107 | 78  |
| 43  | 41  | 61  | 22  | 28  | 29  | 36  | 34  | 43  | 41  |
| 29  | 44  | 32  | 25  | 33  | 40  | 58  | 57  | 55  | 49  |
| 69  | 71  | 84  | 55  | 86  | 60  | 74  | 56  | 73  | 84  |
| 30  | 28  | 34  | 34  | 39  | 39  | 55  | 49  | 62  | 40  |
| 19  | 14  | 26  | 14  | 23  | 29  | 18  | 27  | 27  | 15  |
| 19  | 29  | 30  | 28  | 22  | 22  | 18  | 17  | 18  | 24  |
| 105 | 86  | 112 | 67  | 91  | 89  | 112 | 84  | 113 | 66  |
| 26  | 43  | 35  | 38  | 43  | 50  | 50  | 36  | 58  | 36  |
| 15  | 21  | 22  | 10  | 14  | 12  | 9   | 13  | 20  | 9   |
| 125 | 108 | 103 | 213 | 265 | 284 | 274 | 249 | 278 | 133 |
| 51  | 65  | 64  | 93  | 109 | 106 | 68  | 51  | 71  | 44  |
| 19  | 21  | 32  | 28  | 25  | 24  | 27  | 29  | 33  | 22  |
| 15  | 10  | 21  | 11  | 8   | 12  | 10  | 6   | 12  | 17  |

|     |     |     |     |     |     |     |     |     |     |
|-----|-----|-----|-----|-----|-----|-----|-----|-----|-----|
| 37  | 52  | 45  | 39  | 38  | 54  | 33  | 32  | 32  | 37  |
| 192 | 211 | 188 | 182 | 209 | 187 | 129 | 151 | 150 | 189 |
| 128 | 135 | 181 | 102 | 155 | 124 | 176 | 158 | 158 | 144 |
| 80  | 92  | 94  | 60  | 67  | 61  | 55  | 55  | 66  | 75  |
| 111 | 116 | 122 | 42  | 69  | 56  | 73  | 59  | 64  | 116 |
| 119 | 118 | 173 | 98  | 115 | 102 | 110 | 102 | 105 | 128 |
| 107 | 139 | 133 | 159 | 224 | 205 | 202 | 186 | 200 | 145 |
| 186 | 164 | 186 | 77  | 119 | 98  | 149 | 109 | 126 | 159 |
| 158 | 131 | 160 | 117 | 133 | 108 | 100 | 114 | 125 | 123 |
| 257 | 288 | 311 | 275 | 352 | 299 | 210 | 187 | 209 | 278 |
| 24  | 18  | 19  | 4   | 5   | 9   | 4   | 10  | 8   | 17  |
| 363 | 380 | 402 | 210 | 231 | 256 | 231 | 215 | 225 | 312 |
| 32  | 29  | 34  | 61  | 63  | 68  | 65  | 69  | 71  | 38  |
| 30  | 38  | 43  | 32  | 62  | 39  | 40  | 26  | 35  | 39  |
| 56  | 41  | 52  | 57  | 79  | 67  | 64  | 66  | 66  | 41  |
| 25  | 35  | 40  | 37  | 40  | 53  | 39  | 43  | 68  | 35  |
| 57  | 56  | 64  | 129 | 191 | 147 | 162 | 128 | 130 | 66  |
| 44  | 51  | 51  | 145 | 163 | 160 | 101 | 109 | 122 | 78  |
| 27  | 34  | 20  | 72  | 82  | 84  | 79  | 71  | 74  | 36  |
| 45  | 31  | 37  | 134 | 150 | 123 | 90  | 70  | 87  | 46  |
| 51  | 65  | 66  | 97  | 112 | 102 | 128 | 114 | 102 | 73  |
| 16  | 35  | 32  | 33  | 51  | 44  | 52  | 47  | 50  | 24  |
| 57  | 48  | 52  | 180 | 255 | 238 | 205 | 147 | 178 | 78  |
| 56  | 59  | 50  | 85  | 79  | 83  | 97  | 76  | 76  | 63  |
| 40  | 61  | 46  | 110 | 180 | 139 | 152 | 127 | 137 | 73  |
| 33  | 31  | 42  | 37  | 47  | 28  | 46  | 49  | 42  | 39  |
| 35  | 32  | 30  | 62  | 93  | 81  | 48  | 45  | 39  | 34  |
| 46  | 42  | 47  | 84  | 130 | 115 | 128 | 119 | 120 | 77  |
| 21  | 16  | 17  | 31  | 31  | 32  | 35  | 45  | 42  | 27  |
| 15  | 22  | 22  | 79  | 95  | 91  | 63  | 65  | 75  | 43  |
| 21  | 19  | 15  | 57  | 107 | 73  | 60  | 49  | 54  | 28  |
| 54  | 61  | 60  | 262 | 316 | 255 | 353 | 317 | 324 | 150 |
| 31  | 26  | 32  | 76  | 91  | 89  | 51  | 40  | 65  | 43  |
| 79  | 66  | 78  | 51  | 61  | 65  | 57  | 53  | 60  | 64  |
| 60  | 61  | 72  | 90  | 108 | 89  | 138 | 121 | 118 | 85  |
| 85  | 79  | 79  | 145 | 216 | 208 | 149 | 160 | 167 | 101 |
| 92  | 87  | 112 | 117 | 135 | 113 | 163 | 128 | 149 | 100 |
| 45  | 24  | 44  | 55  | 77  | 64  | 47  | 53  | 54  | 31  |
| 59  | 50  | 41  | 129 | 182 | 138 | 104 | 80  | 91  | 56  |
| 55  | 61  | 73  | 110 | 161 | 121 | 131 | 130 | 142 | 78  |
| 13  | 21  | 21  | 34  | 46  | 33  | 32  | 36  | 38  | 25  |



|     |     |     |     |     |     |     |     |     |     |
|-----|-----|-----|-----|-----|-----|-----|-----|-----|-----|
| 49  | 57  | 62  | 73  | 90  | 72  | 85  | 60  | 74  | 47  |
| 98  | 89  | 102 | 153 | 160 | 178 | 176 | 152 | 189 | 113 |
| 27  | 29  | 43  | 64  | 72  | 61  | 45  | 34  | 50  | 33  |
| 31  | 33  | 27  | 16  | 14  | 10  | 26  | 22  | 22  | 39  |
| 79  | 83  | 110 | 27  | 51  | 38  | 45  | 44  | 40  | 66  |
| 39  | 52  | 36  | 51  | 57  | 50  | 65  | 91  | 79  | 45  |
| 31  | 33  | 31  | 23  | 37  | 24  | 34  | 27  | 36  | 24  |
| 37  | 43  | 55  | 40  | 44  | 41  | 32  | 32  | 40  | 55  |
| 24  | 32  | 40  | 8   | 8   | 5   | 10  | 9   | 14  | 26  |
| 22  | 30  | 36  | 14  | 31  | 26  | 24  | 20  | 21  | 23  |
| 55  | 58  | 56  | 140 | 157 | 145 | 107 | 95  | 119 | 61  |
| 29  | 19  | 28  | 27  | 32  | 23  | 37  | 35  | 25  | 31  |
| 44  | 54  | 49  | 58  | 72  | 65  | 68  | 80  | 75  | 57  |
| 38  | 28  | 43  | 54  | 64  | 67  | 76  | 54  | 68  | 52  |
| 26  | 26  | 35  | 45  | 41  | 37  | 32  | 37  | 41  | 31  |
| 42  | 41  | 43  | 54  | 63  | 82  | 71  | 64  | 66  | 38  |
| 43  | 42  | 46  | 57  | 85  | 65  | 55  | 46  | 64  | 57  |
| 38  | 42  | 42  | 70  | 77  | 87  | 72  | 64  | 71  | 47  |
| 29  | 27  | 31  | 29  | 43  | 32  | 27  | 32  | 23  | 22  |
| 25  | 31  | 32  | 34  | 30  | 45  | 26  | 34  | 37  | 22  |
| 111 | 120 | 147 | 112 | 116 | 121 | 122 | 107 | 136 | 121 |
| 19  | 28  | 35  | 48  | 55  | 51  | 49  | 38  | 32  | 31  |
| 62  | 47  | 58  | 65  | 92  | 91  | 69  | 69  | 81  | 61  |
| 33  | 36  | 42  | 60  | 76  | 80  | 68  | 72  | 89  | 55  |
| 23  | 21  | 29  | 30  | 30  | 25  | 29  | 26  | 29  | 37  |
| 56  | 60  | 70  | 95  | 166 | 135 | 113 | 88  | 99  | 89  |
| 54  | 40  | 53  | 70  | 79  | 83  | 96  | 71  | 81  | 58  |
| 60  | 78  | 75  | 106 | 102 | 102 | 82  | 71  | 85  | 54  |
| 39  | 50  | 66  | 41  | 52  | 58  | 38  | 46  | 40  | 35  |
| 142 | 140 | 159 | 143 | 209 | 156 | 191 | 189 | 205 | 157 |
| 72  | 70  | 69  | 105 | 145 | 115 | 106 | 123 | 118 | 77  |
| 44  | 51  | 46  | 68  | 75  | 63  | 74  | 75  | 65  | 46  |
| 28  | 36  | 46  | 53  | 70  | 54  | 42  | 38  | 40  | 19  |
| 123 | 94  | 110 | 234 | 293 | 255 | 305 | 289 | 357 | 162 |
| 72  | 73  | 85  | 102 | 137 | 130 | 122 | 104 | 154 | 79  |
| 19  | 16  | 18  | 44  | 54  | 39  | 53  | 39  | 45  | 18  |
| 40  | 27  | 36  | 137 | 137 | 129 | 135 | 81  | 101 | 64  |
| 40  | 49  | 35  | 124 | 154 | 137 | 143 | 111 | 138 | 51  |
| 37  | 54  | 53  | 82  | 91  | 98  | 100 | 96  | 119 | 67  |
| 50  | 42  | 43  | 42  | 63  | 62  | 53  | 50  | 45  | 37  |
| 36  | 39  | 30  | 46  | 73  | 63  | 65  | 58  | 66  | 45  |

|    |    |    |     |     |     |     |     |     |    |
|----|----|----|-----|-----|-----|-----|-----|-----|----|
| 31 | 33 | 34 | 39  | 42  | 42  | 41  | 40  | 46  | 33 |
| 44 | 37 | 27 | 51  | 45  | 24  | 34  | 26  | 39  | 35 |
| 15 | 20 | 19 | 22  | 31  | 19  | 17  | 11  | 18  | 16 |
| 24 | 28 | 28 | 28  | 36  | 40  | 27  | 31  | 27  | 14 |
| 33 | 29 | 34 | 28  | 28  | 19  | 21  | 25  | 35  | 33 |
| 35 | 26 | 36 | 22  | 19  | 19  | 15  | 14  | 24  | 24 |
| 4  | 9  | 13 | 11  | 25  | 17  | 15  | 9   | 9   | 5  |
| 40 | 23 | 41 | 60  | 62  | 57  | 63  | 52  | 51  | 42 |
| 19 | 26 | 36 | 58  | 75  | 60  | 44  | 40  | 43  | 27 |
| 45 | 50 | 52 | 138 | 152 | 126 | 123 | 100 | 114 | 57 |
| 59 | 56 | 61 | 88  | 117 | 100 | 86  | 73  | 91  | 45 |
| 39 | 30 | 50 | 104 | 141 | 101 | 90  | 82  | 85  | 45 |
| 7  | 8  | 13 | 12  | 16  | 21  | 14  | 17  | 8   | 12 |
| 19 | 16 | 21 | 54  | 68  | 45  | 56  | 39  | 48  | 24 |
| 44 | 33 | 44 | 59  | 78  | 58  | 49  | 47  | 61  | 32 |
| 77 | 93 | 87 | 67  | 111 | 86  | 125 | 97  | 95  | 80 |
| 52 | 58 | 53 | 115 | 133 | 109 | 119 | 129 | 122 | 72 |
| 38 | 53 | 45 | 40  | 41  | 44  | 32  | 31  | 40  | 37 |
| 48 | 48 | 54 | 29  | 39  | 25  | 47  | 36  | 41  | 39 |
| 37 | 40 | 40 | 43  | 56  | 46  | 44  | 30  | 38  | 36 |
| 52 | 62 | 62 | 57  | 66  | 45  | 63  | 57  | 49  | 46 |
| 73 | 68 | 80 | 64  | 82  | 72  | 94  | 58  | 80  | 61 |
| 40 | 50 | 56 | 39  | 55  | 39  | 41  | 47  | 39  | 42 |
| 9  | 4  | 3  | 19  | 24  | 23  | 9   | 7   | 18  | 5  |
| 38 | 41 | 45 | 32  | 39  | 36  | 27  | 24  | 37  | 30 |
| 25 | 18 | 26 | 63  | 67  | 44  | 19  | 27  | 33  | 26 |
| 32 | 43 | 36 | 86  | 82  | 61  | 47  | 27  | 40  | 27 |
| 28 | 22 | 42 | 41  | 44  | 39  | 21  | 24  | 24  | 20 |
| 36 | 42 | 32 | 58  | 48  | 63  | 38  | 37  | 24  | 26 |
| 38 | 39 | 35 | 46  | 63  | 43  | 44  | 30  | 39  | 37 |
| 27 | 30 | 30 | 52  | 83  | 60  | 34  | 24  | 39  | 14 |
| 34 | 29 | 38 | 31  | 27  | 29  | 32  | 28  | 25  | 24 |
| 11 | 13 | 18 | 28  | 33  | 27  | 14  | 15  | 11  | 12 |
| 36 | 36 | 42 | 41  | 65  | 54  | 30  | 32  | 42  | 49 |
| 28 | 34 | 34 | 45  | 57  | 42  | 54  | 28  | 49  | 25 |
| 28 | 28 | 34 | 11  | 26  | 23  | 16  | 24  | 21  | 28 |
| 33 | 31 | 37 | 25  | 30  | 34  | 32  | 25  | 31  | 26 |
| 54 | 64 | 58 | 54  | 66  | 64  | 80  | 58  | 82  | 58 |
| 29 | 32 | 24 | 46  | 55  | 39  | 54  | 53  | 53  | 38 |
| 52 | 46 | 55 | 40  | 39  | 53  | 31  | 47  | 57  | 50 |
| 27 | 22 | 23 | 15  | 33  | 30  | 17  | 20  | 16  | 20 |

|     |     |     |     |     |     |     |     |     |     |
|-----|-----|-----|-----|-----|-----|-----|-----|-----|-----|
| 165 | 185 | 181 | 158 | 226 | 187 | 256 | 263 | 250 | 195 |
| 13  | 20  | 20  | 21  | 16  | 21  | 24  | 13  | 20  | 9   |
| 35  | 33  | 30  | 21  | 26  | 25  | 23  | 28  | 20  | 29  |
| 49  | 45  | 55  | 106 | 126 | 130 | 112 | 76  | 121 | 65  |
| 45  | 40  | 44  | 68  | 80  | 72  | 51  | 37  | 47  | 36  |
| 27  | 27  | 29  | 48  | 62  | 68  | 55  | 44  | 50  | 27  |
| 36  | 34  | 31  | 49  | 60  | 65  | 56  | 34  | 34  | 34  |
| 11  | 21  | 18  | 72  | 82  | 51  | 47  | 36  | 44  | 26  |
| 4   | 1   | 1   | 3   | 2   | 0   | 4   | 0   | 2   | 1   |
| 53  | 47  | 56  | 63  | 64  | 56  | 41  | 50  | 60  | 59  |
| 44  | 37  | 38  | 36  | 54  | 45  | 67  | 53  | 55  | 35  |
| 44  | 29  | 48  | 64  | 76  | 68  | 55  | 57  | 44  | 36  |
| 23  | 25  | 19  | 152 | 222 | 164 | 114 | 121 | 126 | 44  |
| 33  | 23  | 27  | 45  | 80  | 55  | 47  | 43  | 48  | 46  |
| 37  | 31  | 46  | 35  | 27  | 45  | 47  | 49  | 50  | 33  |
| 32  | 28  | 28  | 34  | 46  | 44  | 50  | 37  | 46  | 34  |
| 65  | 80  | 94  | 63  | 94  | 68  | 103 | 86  | 68  | 85  |
| 35  | 38  | 30  | 46  | 36  | 45  | 41  | 37  | 40  | 30  |
| 32  | 28  | 39  | 37  | 48  | 43  | 34  | 43  | 49  | 38  |
| 24  | 26  | 22  | 68  | 81  | 69  | 56  | 61  | 53  | 33  |
| 30  | 32  | 25  | 56  | 58  | 56  | 35  | 31  | 26  | 26  |
| 69  | 104 | 100 | 73  | 96  | 108 | 51  | 53  | 44  | 39  |
| 35  | 50  | 51  | 110 | 137 | 125 | 104 | 94  | 131 | 67  |
| 83  | 81  | 101 | 76  | 124 | 119 | 79  | 84  | 106 | 95  |
| 21  | 20  | 24  | 53  | 61  | 51  | 51  | 40  | 31  | 19  |
| 46  | 39  | 44  | 128 | 177 | 159 | 149 | 126 | 146 | 70  |
| 39  | 34  | 41  | 43  | 60  | 45  | 45  | 39  | 49  | 41  |
| 19  | 25  | 31  | 36  | 68  | 38  | 25  | 36  | 46  | 23  |
| 45  | 55  | 46  | 66  | 79  | 67  | 40  | 47  | 56  | 52  |
| 20  | 29  | 25  | 25  | 40  | 29  | 27  | 33  | 27  | 21  |
| 42  | 37  | 37  | 42  | 50  | 43  | 33  | 28  | 28  | 34  |
| 49  | 51  | 56  | 57  | 86  | 91  | 56  | 46  | 70  | 54  |
| 50  | 44  | 42  | 60  | 73  | 75  | 55  | 68  | 58  | 36  |
| 34  | 26  | 36  | 32  | 64  | 55  | 42  | 32  | 43  | 34  |
| 18  | 18  | 25  | 43  | 61  | 45  | 113 | 97  | 108 | 35  |
| 23  | 33  | 22  | 34  | 43  | 42  | 43  | 28  | 41  | 25  |
| 9   | 7   | 9   | 12  | 16  | 14  | 10  | 15  | 18  | 11  |
| 62  | 53  | 73  | 91  | 96  | 71  | 135 | 108 | 125 | 48  |
| 45  | 46  | 40  | 73  | 88  | 83  | 63  | 53  | 68  | 47  |
| 68  | 68  | 84  | 43  | 77  | 59  | 87  | 59  | 76  | 63  |
| 76  | 90  | 84  | 187 | 263 | 266 | 251 | 224 | 290 | 126 |

|     |    |     |     |     |     |     |     |     |     |
|-----|----|-----|-----|-----|-----|-----|-----|-----|-----|
| 37  | 34 | 41  | 58  | 61  | 70  | 57  | 63  | 68  | 63  |
| 51  | 35 | 44  | 140 | 207 | 139 | 121 | 121 | 106 | 63  |
| 52  | 60 | 57  | 101 | 116 | 100 | 119 | 92  | 103 | 66  |
| 30  | 35 | 28  | 26  | 31  | 34  | 40  | 37  | 41  | 36  |
| 31  | 42 | 56  | 152 | 121 | 114 | 186 | 180 | 177 | 77  |
| 54  | 77 | 55  | 47  | 45  | 35  | 70  | 47  | 57  | 45  |
| 34  | 38 | 37  | 29  | 35  | 27  | 30  | 31  | 45  | 30  |
| 51  | 65 | 59  | 113 | 135 | 118 | 92  | 105 | 110 | 61  |
| 42  | 37 | 41  | 31  | 23  | 31  | 33  | 41  | 52  | 38  |
| 11  | 16 | 18  | 6   | 12  | 8   | 8   | 7   | 5   | 15  |
| 101 | 96 | 111 | 97  | 131 | 107 | 121 | 106 | 100 | 84  |
| 41  | 46 | 42  | 30  | 37  | 29  | 35  | 22  | 26  | 35  |
| 37  | 36 | 40  | 37  | 42  | 34  | 43  | 37  | 34  | 39  |
| 10  | 25 | 22  | 15  | 19  | 13  | 16  | 17  | 21  | 19  |
| 43  | 41 | 41  | 61  | 72  | 70  | 62  | 60  | 78  | 43  |
| 17  | 12 | 14  | 18  | 18  | 18  | 18  | 17  | 18  | 16  |
| 35  | 38 | 30  | 41  | 55  | 39  | 29  | 40  | 23  | 23  |
| 13  | 12 | 23  | 19  | 19  | 16  | 12  | 13  | 8   | 12  |
| 46  | 47 | 43  | 46  | 74  | 54  | 46  | 28  | 49  | 30  |
| 27  | 19 | 33  | 29  | 35  | 20  | 32  | 32  | 35  | 26  |
| 15  | 16 | 19  | 9   | 11  | 17  | 11  | 14  | 27  | 13  |
| 19  | 21 | 26  | 25  | 30  | 23  | 17  | 25  | 24  | 10  |
| 32  | 25 | 19  | 47  | 59  | 59  | 40  | 41  | 53  | 31  |
| 47  | 50 | 65  | 80  | 108 | 66  | 67  | 44  | 74  | 52  |
| 19  | 24 | 28  | 70  | 71  | 73  | 62  | 50  | 34  | 35  |
| 56  | 51 | 49  | 98  | 99  | 105 | 109 | 110 | 121 | 70  |
| 58  | 61 | 81  | 68  | 93  | 81  | 62  | 74  | 72  | 53  |
| 26  | 40 | 35  | 33  | 52  | 50  | 43  | 22  | 33  | 35  |
| 50  | 51 | 77  | 60  | 81  | 55  | 76  | 77  | 82  | 50  |
| 72  | 65 | 94  | 42  | 34  | 33  | 66  | 51  | 63  | 65  |
| 38  | 42 | 36  | 71  | 79  | 68  | 49  | 53  | 68  | 41  |
| 53  | 37 | 50  | 96  | 107 | 93  | 81  | 74  | 73  | 46  |
| 26  | 33 | 22  | 56  | 47  | 57  | 47  | 28  | 44  | 29  |
| 76  | 63 | 70  | 170 | 264 | 180 | 216 | 211 | 217 | 119 |
| 63  | 57 | 61  | 206 | 256 | 223 | 271 | 218 | 240 | 85  |
| 62  | 59 | 81  | 108 | 128 | 120 | 120 | 88  | 110 | 66  |
| 64  | 59 | 64  | 82  | 99  | 75  | 125 | 118 | 106 | 68  |
| 50  | 52 | 54  | 60  | 67  | 43  | 59  | 47  | 61  | 47  |
| 39  | 47 | 54  | 58  | 57  | 45  | 83  | 51  | 74  | 51  |
| 58  | 54 | 55  | 93  | 127 | 110 | 116 | 121 | 130 | 67  |
| 57  | 46 | 49  | 100 | 117 | 87  | 75  | 76  | 66  | 51  |

|    |     |     |     |     |     |     |     |     |     |
|----|-----|-----|-----|-----|-----|-----|-----|-----|-----|
| 42 | 44  | 49  | 80  | 89  | 84  | 73  | 78  | 74  | 33  |
| 6  | 3   | 3   | 5   | 3   | 1   | 7   | 9   | 4   | 5   |
| 66 | 73  | 86  | 86  | 86  | 69  | 112 | 86  | 94  | 69  |
| 37 | 61  | 42  | 38  | 53  | 39  | 58  | 62  | 63  | 44  |
| 52 | 55  | 59  | 92  | 101 | 101 | 124 | 124 | 119 | 62  |
| 44 | 44  | 57  | 53  | 78  | 90  | 52  | 65  | 59  | 38  |
| 35 | 31  | 37  | 39  | 34  | 35  | 23  | 31  | 30  | 22  |
| 52 | 44  | 67  | 76  | 84  | 77  | 89  | 84  | 79  | 65  |
| 85 | 109 | 104 | 152 | 214 | 171 | 190 | 153 | 178 | 133 |
| 96 | 81  | 88  | 153 | 143 | 121 | 124 | 130 | 107 | 92  |
| 19 | 21  | 31  | 31  | 43  | 45  | 31  | 27  | 42  | 18  |
| 91 | 55  | 79  | 161 | 202 | 161 | 189 | 209 | 193 | 113 |
| 9  | 11  | 14  | 13  | 23  | 17  | 11  | 6   | 10  | 10  |
| 45 | 58  | 58  | 73  | 90  | 60  | 86  | 78  | 59  | 57  |
| 87 | 80  | 82  | 140 | 162 | 121 | 172 | 152 | 198 | 117 |
| 72 | 80  | 78  | 144 | 171 | 159 | 212 | 179 | 231 | 124 |
| 55 | 56  | 50  | 104 | 123 | 90  | 101 | 115 | 131 | 60  |
| 43 | 41  | 45  | 82  | 96  | 114 | 96  | 86  | 81  | 73  |
| 52 | 53  | 53  | 90  | 112 | 80  | 92  | 83  | 109 | 60  |
| 33 | 8   | 20  | 29  | 25  | 33  | 26  | 20  | 28  | 20  |
| 17 | 14  | 19  | 26  | 34  | 33  | 30  | 25  | 30  | 25  |
| 35 | 28  | 34  | 90  | 89  | 81  | 72  | 60  | 102 | 45  |
| 6  | 7   | 3   | 7   | 4   | 4   | 4   | 5   | 7   | 5   |
| 9  | 8   | 9   | 11  | 8   | 10  | 10  | 10  | 10  | 11  |
| 17 | 13  | 15  | 17  | 24  | 27  | 21  | 17  | 27  | 19  |
| 30 | 31  | 32  | 50  | 42  | 41  | 37  | 29  | 40  | 25  |
| 17 | 16  | 19  | 16  | 18  | 13  | 12  | 21  | 14  | 19  |
| 27 | 29  | 19  | 45  | 48  | 51  | 38  | 24  | 33  | 19  |
| 19 | 28  | 41  | 49  | 56  | 49  | 32  | 38  | 40  | 24  |
| 22 | 14  | 26  | 58  | 76  | 33  | 23  | 21  | 28  | 23  |
| 27 | 26  | 22  | 53  | 78  | 65  | 49  | 55  | 65  | 22  |
| 19 | 18  | 26  | 48  | 68  | 67  | 30  | 37  | 41  | 19  |
| 20 | 15  | 16  | 42  | 32  | 40  | 25  | 27  | 30  | 18  |
| 31 | 38  | 43  | 61  | 67  | 61  | 58  | 58  | 48  | 53  |
| 31 | 22  | 27  | 19  | 18  | 26  | 27  | 25  | 32  | 17  |
| 38 | 43  | 47  | 52  | 39  | 52  | 52  | 66  | 60  | 44  |
| 47 | 38  | 45  | 59  | 80  | 74  | 72  | 73  | 76  | 29  |
| 40 | 41  | 41  | 79  | 76  | 78  | 63  | 54  | 62  | 55  |
| 31 | 31  | 53  | 56  | 53  | 51  | 50  | 38  | 58  | 41  |
| 60 | 64  | 50  | 76  | 76  | 67  | 62  | 58  | 81  | 43  |
| 52 | 35  | 49  | 71  | 77  | 61  | 57  | 70  | 74  | 47  |

|     |     |     |     |     |     |     |     |     |    |
|-----|-----|-----|-----|-----|-----|-----|-----|-----|----|
| 39  | 36  | 50  | 110 | 110 | 99  | 108 | 78  | 111 | 54 |
| 47  | 54  | 62  | 95  | 137 | 117 | 83  | 93  | 77  | 47 |
| 57  | 44  | 54  | 50  | 99  | 67  | 65  | 77  | 66  | 52 |
| 41  | 42  | 47  | 61  | 44  | 45  | 58  | 46  | 42  | 58 |
| 51  | 40  | 39  | 24  | 42  | 30  | 38  | 30  | 43  | 43 |
| 43  | 32  | 50  | 11  | 19  | 17  | 21  | 21  | 19  | 31 |
| 111 | 120 | 118 | 56  | 56  | 55  | 64  | 50  | 60  | 51 |
| 26  | 23  | 25  | 66  | 69  | 60  | 64  | 44  | 56  | 23 |
| 29  | 30  | 27  | 31  | 48  | 27  | 40  | 24  | 27  | 13 |
| 75  | 69  | 64  | 126 | 133 | 135 | 84  | 81  | 102 | 37 |
| 73  | 65  | 56  | 89  | 89  | 87  | 74  | 79  | 72  | 34 |
| 80  | 67  | 63  | 116 | 147 | 112 | 77  | 72  | 86  | 50 |
| 70  | 72  | 70  | 120 | 154 | 146 | 124 | 106 | 114 | 65 |
| 53  | 51  | 50  | 50  | 68  | 62  | 68  | 74  | 50  | 47 |
| 40  | 27  | 44  | 66  | 119 | 81  | 66  | 81  | 80  | 48 |
| 50  | 37  | 55  | 81  | 125 | 95  | 90  | 68  | 78  | 41 |
| 21  | 34  | 31  | 63  | 74  | 56  | 53  | 34  | 40  | 22 |
| 66  | 63  | 79  | 89  | 90  | 82  | 56  | 52  | 53  | 58 |
| 63  | 74  | 68  | 58  | 96  | 77  | 62  | 51  | 71  | 70 |
| 33  | 38  | 40  | 38  | 54  | 42  | 55  | 48  | 48  | 46 |
| 41  | 58  | 32  | 91  | 116 | 88  | 131 | 151 | 138 | 78 |
| 104 | 91  | 122 | 144 | 148 | 101 | 145 | 121 | 134 | 85 |
| 19  | 27  | 29  | 37  | 43  | 30  | 41  | 35  | 30  | 25 |
| 94  | 83  | 87  | 103 | 152 | 120 | 131 | 117 | 142 | 72 |
| 59  | 39  | 47  | 31  | 47  | 53  | 44  | 43  | 44  | 46 |
| 64  | 77  | 86  | 98  | 144 | 115 | 65  | 74  | 73  | 65 |
| 68  | 51  | 58  | 53  | 54  | 84  | 106 | 105 | 99  | 48 |
| 70  | 68  | 80  | 74  | 102 | 87  | 88  | 71  | 94  | 56 |
| 27  | 22  | 50  | 36  | 43  | 34  | 44  | 40  | 35  | 28 |
| 36  | 31  | 41  | 31  | 34  | 34  | 39  | 30  | 42  | 30 |
| 44  | 52  | 57  | 53  | 81  | 80  | 71  | 61  | 72  | 56 |
| 27  | 40  | 40  | 30  | 45  | 33  | 35  | 39  | 36  | 30 |
| 31  | 28  | 32  | 49  | 42  | 43  | 58  | 38  | 59  | 47 |
| 17  | 20  | 26  | 22  | 40  | 28  | 29  | 19  | 16  | 32 |
| 34  | 37  | 51  | 34  | 24  | 27  | 27  | 24  | 30  | 31 |
| 33  | 34  | 42  | 54  | 65  | 83  | 53  | 52  | 47  | 40 |
| 23  | 21  | 30  | 17  | 34  | 30  | 27  | 21  | 29  | 27 |
| 7   | 10  | 19  | 113 | 145 | 112 | 88  | 81  | 98  | 29 |
| 28  | 33  | 30  | 106 | 122 | 102 | 126 | 88  | 82  | 41 |
| 23  | 20  | 26  | 119 | 147 | 127 | 66  | 67  | 68  | 35 |
| 29  | 40  | 45  | 204 | 277 | 204 | 220 | 204 | 207 | 99 |

|    |    |    |     |     |     |     |     |     |    |
|----|----|----|-----|-----|-----|-----|-----|-----|----|
| 63 | 63 | 75 | 69  | 91  | 77  | 105 | 69  | 90  | 54 |
| 31 | 20 | 25 | 100 | 162 | 96  | 63  | 51  | 68  | 32 |
| 8  | 8  | 4  | 17  | 28  | 22  | 15  | 12  | 25  | 13 |
| 16 | 26 | 24 | 185 | 245 | 202 | 186 | 145 | 181 | 79 |
| 46 | 38 | 56 | 57  | 64  | 54  | 44  | 30  | 32  | 40 |
| 34 | 40 | 40 | 68  | 58  | 64  | 32  | 45  | 42  | 38 |
| 44 | 48 | 48 | 52  | 72  | 77  | 61  | 72  | 69  | 37 |
| 34 | 33 | 26 | 28  | 37  | 33  | 41  | 28  | 29  | 25 |
| 23 | 13 | 21 | 16  | 25  | 13  | 26  | 16  | 8   | 25 |
| 13 | 22 | 15 | 10  | 13  | 16  | 22  | 18  | 8   | 16 |
| 16 | 20 | 19 | 43  | 58  | 55  | 22  | 28  | 38  | 23 |
| 44 | 45 | 58 | 93  | 85  | 81  | 60  | 52  | 48  | 41 |
| 4  | 7  | 12 | 4   | 5   | 3   | 6   | 6   | 9   | 6  |
| 47 | 57 | 64 | 66  | 96  | 70  | 54  | 56  | 61  | 49 |
| 3  | 10 | 3  | 12  | 13  | 20  | 6   | 10  | 10  | 10 |
| 42 | 40 | 48 | 60  | 83  | 55  | 77  | 85  | 84  | 61 |
| 56 | 36 | 46 | 58  | 73  | 69  | 51  | 47  | 65  | 61 |
| 5  | 12 | 10 | 7   | 3   | 3   | 8   | 7   | 7   | 10 |
| 64 | 63 | 55 | 62  | 93  | 82  | 68  | 72  | 77  | 51 |
| 58 | 62 | 74 | 35  | 53  | 46  | 53  | 41  | 30  | 50 |
| 48 | 37 | 54 | 33  | 54  | 48  | 40  | 68  | 55  | 52 |
| 17 | 13 | 25 | 27  | 23  | 19  | 12  | 17  | 26  | 17 |
| 29 | 25 | 29 | 38  | 22  | 24  | 39  | 26  | 40  | 28 |
| 58 | 45 | 74 | 63  | 70  | 92  | 61  | 52  | 69  | 62 |
| 26 | 18 | 21 | 32  | 43  | 26  | 35  | 26  | 34  | 24 |
| 17 | 19 | 21 | 35  | 62  | 54  | 24  | 27  | 27  | 18 |
| 52 | 39 | 47 | 66  | 70  | 83  | 75  | 75  | 68  | 57 |
| 9  | 14 | 14 | 18  | 25  | 15  | 10  | 16  | 17  | 17 |
| 38 | 49 | 42 | 64  | 62  | 67  | 75  | 73  | 83  | 50 |
| 42 | 66 | 52 | 41  | 43  | 35  | 55  | 48  | 57  | 30 |
| 29 | 26 | 26 | 36  | 19  | 29  | 28  | 16  | 30  | 26 |
| 34 | 42 | 47 | 29  | 24  | 42  | 50  | 49  | 53  | 37 |
| 54 | 59 | 60 | 152 | 176 | 158 | 127 | 109 | 133 | 86 |
| 60 | 54 | 64 | 143 | 158 | 126 | 94  | 75  | 89  | 56 |
| 30 | 34 | 36 | 78  | 114 | 81  | 47  | 46  | 48  | 32 |
| 43 | 40 | 48 | 112 | 127 | 111 | 81  | 88  | 100 | 43 |
| 49 | 37 | 50 | 155 | 194 | 154 | 90  | 93  | 85  | 56 |
| 10 | 18 | 16 | 19  | 11  | 13  | 22  | 28  | 22  | 14 |
| 35 | 50 | 51 | 115 | 135 | 120 | 74  | 84  | 97  | 59 |
| 46 | 65 | 46 | 92  | 105 | 100 | 110 | 84  | 103 | 59 |
| 28 | 35 | 55 | 61  | 87  | 73  | 59  | 37  | 52  | 41 |

|     |     |     |     |     |     |     |     |     |     |
|-----|-----|-----|-----|-----|-----|-----|-----|-----|-----|
| 40  | 35  | 29  | 115 | 172 | 140 | 92  | 83  | 89  | 45  |
| 60  | 53  | 78  | 218 | 265 | 241 | 219 | 206 | 252 | 98  |
| 59  | 91  | 68  | 253 | 311 | 249 | 383 | 378 | 373 | 150 |
| 76  | 80  | 93  | 225 | 292 | 245 | 311 | 306 | 358 | 150 |
| 73  | 58  | 60  | 177 | 203 | 165 | 252 | 240 | 223 | 102 |
| 78  | 84  | 75  | 196 | 246 | 229 | 241 | 207 | 275 | 121 |
| 54  | 50  | 55  | 160 | 211 | 154 | 192 | 156 | 198 | 73  |
| 111 | 104 | 111 | 204 | 245 | 184 | 227 | 194 | 218 | 111 |
| 69  | 69  | 75  | 144 | 186 | 125 | 266 | 247 | 278 | 123 |
| 25  | 26  | 31  | 63  | 63  | 62  | 49  | 43  | 51  | 39  |
| 55  | 53  | 67  | 85  | 111 | 71  | 96  | 81  | 68  | 84  |
| 41  | 47  | 45  | 46  | 73  | 74  | 47  | 44  | 42  | 49  |
| 46  | 37  | 42  | 76  | 91  | 75  | 50  | 58  | 69  | 42  |
| 42  | 47  | 50  | 63  | 68  | 53  | 46  | 31  | 54  | 36  |
| 60  | 48  | 41  | 61  | 56  | 64  | 64  | 47  | 49  | 52  |
| 23  | 32  | 37  | 33  | 37  | 32  | 43  | 29  | 27  | 31  |
| 61  | 75  | 74  | 108 | 140 | 137 | 155 | 171 | 154 | 87  |
| 81  | 97  | 112 | 65  | 76  | 68  | 43  | 72  | 53  | 59  |
| 38  | 37  | 53  | 50  | 67  | 36  | 86  | 77  | 83  | 59  |
| 29  | 30  | 43  | 97  | 132 | 107 | 84  | 83  | 81  | 50  |
| 33  | 49  | 42  | 215 | 265 | 231 | 434 | 360 | 392 | 208 |
| 53  | 53  | 44  | 73  | 104 | 106 | 94  | 101 | 112 | 58  |
| 58  | 43  | 64  | 279 | 338 | 347 | 600 | 497 | 603 | 291 |
| 55  | 67  | 51  | 168 | 197 | 197 | 187 | 187 | 209 | 94  |
| 38  | 42  | 41  | 61  | 74  | 58  | 76  | 80  | 87  | 42  |
| 87  | 90  | 103 | 129 | 148 | 146 | 157 | 164 | 194 | 108 |
| 17  | 21  | 21  | 43  | 29  | 26  | 23  | 24  | 30  | 22  |
| 66  | 70  | 70  | 64  | 83  | 84  | 72  | 70  | 59  | 69  |
| 63  | 39  | 68  | 119 | 153 | 103 | 106 | 94  | 94  | 57  |
| 40  | 61  | 59  | 57  | 75  | 77  | 48  | 36  | 61  | 41  |
| 62  | 69  | 85  | 94  | 128 | 82  | 64  | 57  | 81  | 61  |
| 44  | 33  | 42  | 43  | 53  | 59  | 43  | 30  | 44  | 44  |
| 51  | 78  | 64  | 64  | 73  | 50  | 49  | 48  | 45  | 53  |
| 44  | 44  | 60  | 36  | 64  | 55  | 51  | 41  | 51  | 34  |
| 63  | 76  | 64  | 86  | 96  | 79  | 76  | 58  | 74  | 56  |
| 30  | 29  | 39  | 64  | 73  | 45  | 47  | 42  | 44  | 34  |
| 37  | 35  | 40  | 54  | 52  | 64  | 68  | 54  | 60  | 52  |
| 28  | 23  | 22  | 21  | 25  | 22  | 18  | 23  | 18  | 21  |
| 40  | 43  | 47  | 97  | 83  | 64  | 49  | 46  | 52  | 42  |
| 43  | 44  | 45  | 92  | 124 | 109 | 78  | 53  | 66  | 52  |
| 33  | 16  | 26  | 30  | 43  | 27  | 20  | 16  | 12  | 24  |



|     |     |     |     |     |     |     |     |     |     |
|-----|-----|-----|-----|-----|-----|-----|-----|-----|-----|
| 39  | 29  | 50  | 61  | 75  | 80  | 44  | 38  | 63  | 39  |
| 32  | 33  | 45  | 69  | 61  | 55  | 71  | 54  | 62  | 43  |
| 41  | 47  | 59  | 49  | 54  | 61  | 93  | 100 | 97  | 60  |
| 21  | 39  | 37  | 25  | 17  | 14  | 23  | 27  | 16  | 28  |
| 4   | 19  | 18  | 5   | 4   | 9   | 9   | 13  | 7   | 14  |
| 30  | 41  | 29  | 51  | 43  | 54  | 48  | 34  | 21  | 35  |
| 4   | 4   | 1   | 5   | 6   | 5   | 10  | 6   | 3   | 5   |
| 30  | 31  | 27  | 14  | 25  | 22  | 25  | 8   | 19  | 22  |
| 35  | 59  | 45  | 10  | 17  | 10  | 21  | 16  | 16  | 41  |
| 19  | 27  | 30  | 12  | 18  | 19  | 22  | 17  | 19  | 20  |
| 6   | 10  | 12  | 5   | 8   | 3   | 6   | 2   | 5   | 12  |
| 35  | 39  | 49  | 25  | 19  | 21  | 36  | 33  | 27  | 27  |
| 90  | 86  | 105 | 85  | 136 | 127 | 78  | 64  | 95  | 79  |
| 164 | 131 | 172 | 113 | 147 | 124 | 99  | 97  | 103 | 101 |
| 51  | 44  | 46  | 55  | 59  | 54  | 47  | 53  | 53  | 27  |
| 76  | 75  | 79  | 126 | 143 | 111 | 85  | 81  | 84  | 84  |
| 39  | 39  | 57  | 75  | 88  | 66  | 74  | 66  | 74  | 43  |
| 80  | 64  | 80  | 73  | 84  | 52  | 109 | 99  | 103 | 75  |
| 109 | 92  | 98  | 183 | 224 | 228 | 284 | 254 | 273 | 142 |
| 27  | 29  | 22  | 24  | 29  | 42  | 37  | 26  | 21  | 22  |
| 28  | 44  | 49  | 65  | 84  | 80  | 75  | 65  | 87  | 34  |
| 49  | 55  | 59  | 67  | 78  | 72  | 57  | 67  | 69  | 44  |
| 92  | 120 | 114 | 309 | 423 | 375 | 574 | 524 | 554 | 232 |
| 27  | 35  | 43  | 96  | 95  | 104 | 111 | 93  | 114 | 56  |
| 56  | 51  | 71  | 104 | 127 | 86  | 113 | 116 | 113 | 68  |
| 48  | 54  | 52  | 103 | 125 | 123 | 128 | 125 | 120 | 88  |
| 36  | 53  | 54  | 113 | 122 | 76  | 71  | 64  | 64  | 55  |
| 20  | 13  | 22  | 17  | 39  | 20  | 21  | 14  | 17  | 17  |
| 39  | 46  | 48  | 81  | 91  | 84  | 73  | 61  | 76  | 52  |
| 35  | 37  | 45  | 38  | 39  | 35  | 48  | 40  | 58  | 36  |
| 38  | 42  | 64  | 82  | 91  | 84  | 97  | 70  | 65  | 66  |
| 43  | 44  | 41  | 39  | 62  | 58  | 42  | 47  | 59  | 39  |
| 35  | 38  | 31  | 74  | 53  | 65  | 57  | 52  | 71  | 33  |
| 34  | 21  | 23  | 20  | 46  | 42  | 26  | 38  | 39  | 26  |
| 49  | 49  | 66  | 67  | 79  | 77  | 57  | 63  | 73  | 54  |
| 36  | 26  | 32  | 31  | 51  | 40  | 39  | 22  | 33  | 36  |
| 39  | 48  | 43  | 75  | 86  | 80  | 87  | 79  | 77  | 38  |
| 32  | 36  | 33  | 52  | 60  | 77  | 60  | 51  | 40  | 28  |
| 33  | 25  | 37  | 50  | 61  | 41  | 44  | 40  | 45  | 37  |
| 26  | 31  | 36  | 39  | 44  | 31  | 27  | 39  | 37  | 24  |
| 58  | 47  | 64  | 112 | 124 | 120 | 120 | 133 | 104 | 81  |

|     |     |     |     |     |     |     |     |     |     |
|-----|-----|-----|-----|-----|-----|-----|-----|-----|-----|
| 57  | 61  | 62  | 91  | 112 | 76  | 94  | 98  | 89  | 53  |
| 95  | 84  | 103 | 149 | 185 | 148 | 177 | 179 | 178 | 99  |
| 46  | 40  | 57  | 68  | 102 | 95  | 109 | 86  | 97  | 48  |
| 53  | 43  | 43  | 60  | 61  | 63  | 43  | 38  | 51  | 35  |
| 60  | 75  | 73  | 132 | 143 | 158 | 166 | 126 | 167 | 85  |
| 58  | 48  | 55  | 88  | 76  | 90  | 78  | 67  | 73  | 55  |
| 37  | 57  | 54  | 62  | 52  | 60  | 100 | 112 | 110 | 54  |
| 63  | 50  | 66  | 66  | 90  | 111 | 84  | 76  | 67  | 42  |
| 41  | 47  | 50  | 87  | 100 | 94  | 100 | 94  | 106 | 71  |
| 46  | 56  | 33  | 55  | 61  | 57  | 52  | 43  | 51  | 31  |
| 41  | 32  | 37  | 47  | 50  | 50  | 55  | 49  | 48  | 37  |
| 55  | 44  | 48  | 53  | 54  | 64  | 32  | 47  | 58  | 48  |
| 31  | 48  | 43  | 43  | 70  | 44  | 54  | 39  | 65  | 34  |
| 29  | 29  | 36  | 13  | 15  | 12  | 17  | 24  | 22  | 18  |
| 28  | 46  | 42  | 44  | 53  | 53  | 48  | 51  | 56  | 44  |
| 54  | 76  | 51  | 21  | 36  | 50  | 74  | 64  | 68  | 52  |
| 37  | 39  | 44  | 39  | 53  | 44  | 33  | 37  | 41  | 40  |
| 20  | 26  | 27  | 22  | 30  | 28  | 23  | 31  | 30  | 24  |
| 76  | 72  | 88  | 67  | 73  | 77  | 71  | 66  | 55  | 56  |
| 50  | 56  | 50  | 103 | 110 | 108 | 111 | 116 | 107 | 64  |
| 31  | 52  | 55  | 78  | 99  | 75  | 95  | 96  | 92  | 51  |
| 60  | 66  | 57  | 96  | 113 | 102 | 117 | 97  | 117 | 74  |
| 47  | 42  | 64  | 51  | 77  | 69  | 45  | 40  | 66  | 41  |
| 29  | 24  | 33  | 36  | 47  | 55  | 46  | 31  | 37  | 19  |
| 95  | 82  | 117 | 107 | 128 | 116 | 94  | 132 | 127 | 91  |
| 37  | 44  | 36  | 86  | 98  | 77  | 55  | 48  | 53  | 37  |
| 36  | 32  | 37  | 113 | 129 | 116 | 75  | 72  | 73  | 47  |
| 52  | 44  | 65  | 65  | 115 | 83  | 85  | 47  | 76  | 44  |
| 42  | 63  | 56  | 144 | 164 | 166 | 127 | 124 | 108 | 77  |
| 49  | 39  | 56  | 91  | 118 | 91  | 91  | 80  | 78  | 49  |
| 37  | 56  | 45  | 34  | 29  | 42  | 46  | 45  | 46  | 34  |
| 45  | 41  | 35  | 44  | 62  | 59  | 70  | 58  | 55  | 54  |
| 1   | 2   | 4   | 13  | 22  | 7   | 5   | 3   | 6   | 3   |
| 68  | 64  | 51  | 109 | 98  | 93  | 102 | 77  | 98  | 67  |
| 54  | 62  | 60  | 120 | 161 | 134 | 117 | 123 | 146 | 79  |
| 12  | 19  | 13  | 15  | 18  | 14  | 18  | 13  | 10  | 15  |
| 62  | 52  | 59  | 80  | 81  | 72  | 110 | 93  | 107 | 64  |
| 158 | 181 | 180 | 111 | 125 | 114 | 150 | 155 | 164 | 142 |
| 64  | 63  | 78  | 51  | 54  | 61  | 51  | 54  | 66  | 63  |
| 59  | 70  | 84  | 129 | 154 | 151 | 162 | 131 | 166 | 84  |
| 64  | 62  | 88  | 74  | 93  | 91  | 88  | 64  | 93  | 50  |

|     |     |     |     |     |     |     |     |     |     |
|-----|-----|-----|-----|-----|-----|-----|-----|-----|-----|
| 55  | 59  | 63  | 25  | 58  | 44  | 43  | 52  | 41  | 45  |
| 42  | 61  | 62  | 53  | 56  | 50  | 57  | 86  | 63  | 52  |
| 40  | 44  | 39  | 84  | 144 | 112 | 151 | 113 | 133 | 69  |
| 50  | 49  | 51  | 113 | 198 | 158 | 138 | 101 | 140 | 66  |
| 27  | 30  | 33  | 35  | 46  | 59  | 49  | 32  | 54  | 28  |
| 56  | 34  | 39  | 75  | 105 | 77  | 63  | 56  | 59  | 50  |
| 46  | 60  | 60  | 89  | 109 | 95  | 101 | 89  | 91  | 55  |
| 79  | 56  | 59  | 93  | 71  | 75  | 102 | 95  | 117 | 65  |
| 59  | 55  | 68  | 86  | 101 | 84  | 87  | 88  | 89  | 65  |
| 57  | 61  | 74  | 104 | 123 | 121 | 195 | 147 | 164 | 100 |
| 53  | 39  | 51  | 48  | 71  | 71  | 77  | 74  | 88  | 41  |
| 50  | 58  | 53  | 39  | 65  | 63  | 50  | 63  | 66  | 53  |
| 48  | 35  | 53  | 99  | 94  | 77  | 63  | 60  | 67  | 44  |
| 58  | 63  | 56  | 126 | 140 | 116 | 103 | 81  | 98  | 60  |
| 67  | 49  | 75  | 121 | 164 | 124 | 136 | 93  | 113 | 71  |
| 20  | 40  | 36  | 13  | 19  | 12  | 11  | 14  | 14  | 28  |
| 39  | 41  | 58  | 42  | 44  | 46  | 48  | 60  | 45  | 46  |
| 45  | 48  | 62  | 47  | 49  | 39  | 35  | 35  | 50  | 31  |
| 45  | 54  | 55  | 54  | 64  | 70  | 66  | 58  | 64  | 61  |
| 47  | 49  | 57  | 49  | 52  | 51  | 48  | 54  | 40  | 47  |
| 80  | 92  | 91  | 53  | 81  | 53  | 66  | 72  | 72  | 77  |
| 54  | 54  | 63  | 35  | 52  | 44  | 22  | 42  | 31  | 60  |
| 22  | 29  | 27  | 13  | 18  | 23  | 17  | 18  | 18  | 17  |
| 99  | 80  | 99  | 58  | 85  | 53  | 61  | 57  | 71  | 82  |
| 30  | 39  | 37  | 35  | 43  | 19  | 47  | 45  | 43  | 34  |
| 68  | 55  | 80  | 56  | 85  | 74  | 82  | 100 | 128 | 68  |
| 36  | 44  | 47  | 48  | 74  | 56  | 73  | 53  | 46  | 45  |
| 48  | 28  | 42  | 39  | 45  | 44  | 34  | 29  | 27  | 38  |
| 20  | 21  | 22  | 31  | 23  | 27  | 22  | 24  | 28  | 26  |
| 46  | 43  | 35  | 33  | 54  | 45  | 49  | 44  | 41  | 42  |
| 52  | 56  | 50  | 44  | 76  | 66  | 57  | 55  | 63  | 34  |
| 227 | 234 | 238 | 171 | 240 | 206 | 340 | 330 | 311 | 281 |
| 42  | 41  | 32  | 28  | 39  | 37  | 36  | 34  | 55  | 29  |
| 48  | 37  | 47  | 47  | 51  | 47  | 44  | 29  | 44  | 40  |
| 50  | 66  | 44  | 68  | 81  | 68  | 56  | 41  | 49  | 59  |
| 42  | 31  | 33  | 51  | 82  | 55  | 40  | 48  | 54  | 47  |
| 68  | 64  | 83  | 90  | 102 | 109 | 98  | 92  | 107 | 61  |
| 25  | 23  | 33  | 27  | 29  | 28  | 28  | 22  | 18  | 24  |
| 79  | 92  | 85  | 75  | 88  | 104 | 84  | 67  | 76  | 76  |
| 14  | 16  | 22  | 39  | 45  | 25  | 19  | 18  | 23  | 16  |
| 22  | 14  | 18  | 24  | 39  | 30  | 24  | 22  | 22  | 20  |

|     |     |     |     |     |     |     |     |     |     |
|-----|-----|-----|-----|-----|-----|-----|-----|-----|-----|
| 39  | 43  | 43  | 59  | 73  | 65  | 43  | 46  | 55  | 27  |
| 62  | 70  | 74  | 116 | 96  | 84  | 53  | 54  | 74  | 44  |
| 33  | 36  | 39  | 58  | 68  | 58  | 41  | 37  | 38  | 40  |
| 30  | 41  | 42  | 40  | 59  | 41  | 59  | 54  | 54  | 40  |
| 28  | 26  | 35  | 21  | 39  | 40  | 54  | 29  | 40  | 34  |
| 10  | 9   | 9   | 5   | 16  | 11  | 8   | 4   | 16  | 8   |
| 72  | 62  | 62  | 92  | 121 | 102 | 135 | 92  | 83  | 55  |
| 23  | 35  | 29  | 51  | 52  | 37  | 32  | 33  | 29  | 34  |
| 25  | 30  | 22  | 17  | 26  | 23  | 26  | 23  | 25  | 32  |
| 38  | 40  | 42  | 44  | 56  | 52  | 58  | 43  | 50  | 31  |
| 60  | 57  | 86  | 80  | 103 | 83  | 82  | 68  | 69  | 67  |
| 101 | 120 | 120 | 215 | 271 | 248 | 258 | 290 | 267 | 127 |
| 17  | 21  | 33  | 44  | 69  | 47  | 37  | 34  | 41  | 38  |
| 67  | 69  | 77  | 107 | 103 | 106 | 90  | 78  | 106 | 59  |
| 51  | 57  | 59  | 71  | 101 | 75  | 88  | 87  | 85  | 58  |
| 47  | 49  | 44  | 33  | 56  | 43  | 57  | 49  | 70  | 33  |
| 27  | 27  | 27  | 77  | 82  | 88  | 113 | 117 | 119 | 51  |
| 43  | 42  | 42  | 57  | 44  | 56  | 63  | 54  | 64  | 52  |
| 59  | 46  | 52  | 76  | 83  | 79  | 96  | 102 | 122 | 58  |
| 32  | 35  | 39  | 121 | 117 | 95  | 95  | 89  | 98  | 46  |
| 53  | 58  | 51  | 88  | 110 | 80  | 92  | 85  | 93  | 46  |
| 57  | 31  | 44  | 53  | 54  | 49  | 50  | 47  | 63  | 34  |
| 62  | 59  | 88  | 82  | 102 | 92  | 106 | 111 | 109 | 71  |
| 31  | 24  | 36  | 59  | 65  | 56  | 52  | 39  | 45  | 27  |
| 49  | 39  | 60  | 87  | 97  | 92  | 79  | 73  | 79  | 61  |
| 24  | 25  | 21  | 50  | 47  | 43  | 24  | 26  | 35  | 27  |
| 42  | 35  | 59  | 59  | 69  | 65  | 58  | 43  | 57  | 40  |
| 55  | 60  | 52  | 70  | 95  | 75  | 56  | 47  | 58  | 41  |
| 22  | 30  | 37  | 176 | 205 | 223 | 154 | 119 | 128 | 68  |
| 21  | 16  | 27  | 81  | 102 | 75  | 40  | 38  | 30  | 21  |
| 40  | 31  | 32  | 119 | 109 | 117 | 101 | 109 | 104 | 61  |
| 23  | 21  | 20  | 40  | 50  | 49  | 32  | 26  | 41  | 31  |
| 28  | 31  | 25  | 50  | 60  | 54  | 34  | 48  | 36  | 29  |
| 40  | 28  | 40  | 74  | 116 | 95  | 76  | 72  | 59  | 52  |
| 45  | 48  | 46  | 179 | 224 | 197 | 117 | 124 | 140 | 72  |
| 22  | 22  | 20  | 34  | 34  | 48  | 25  | 19  | 12  | 20  |
| 97  | 98  | 124 | 76  | 87  | 93  | 118 | 119 | 122 | 105 |
| 93  | 94  | 88  | 149 | 162 | 168 | 235 | 219 | 217 | 134 |
| 54  | 46  | 52  | 46  | 55  | 62  | 51  | 51  | 63  | 47  |
| 96  | 92  | 98  | 72  | 89  | 79  | 85  | 75  | 75  | 89  |
| 31  | 41  | 41  | 57  | 71  | 56  | 55  | 70  | 65  | 54  |

|     |     |     |     |     |     |     |     |     |     |
|-----|-----|-----|-----|-----|-----|-----|-----|-----|-----|
| 52  | 55  | 51  | 62  | 70  | 58  | 62  | 61  | 60  | 53  |
| 18  | 19  | 22  | 26  | 37  | 29  | 34  | 44  | 39  | 18  |
| 73  | 78  | 89  | 86  | 67  | 68  | 95  | 71  | 87  | 66  |
| 51  | 39  | 52  | 57  | 70  | 48  | 67  | 55  | 76  | 39  |
| 31  | 34  | 46  | 39  | 29  | 37  | 52  | 28  | 38  | 28  |
| 32  | 35  | 33  | 32  | 39  | 28  | 34  | 27  | 35  | 28  |
| 28  | 15  | 23  | 11  | 12  | 6   | 13  | 13  | 7   | 24  |
| 106 | 128 | 131 | 93  | 111 | 109 | 116 | 90  | 100 | 84  |
| 45  | 51  | 47  | 59  | 84  | 54  | 64  | 59  | 83  | 42  |
| 32  | 31  | 29  | 40  | 61  | 51  | 51  | 43  | 58  | 28  |
| 27  | 20  | 27  | 50  | 74  | 82  | 48  | 52  | 38  | 29  |
| 129 | 105 | 154 | 181 | 214 | 197 | 197 | 146 | 189 | 122 |
| 47  | 31  | 34  | 51  | 61  | 72  | 57  | 59  | 62  | 40  |
| 31  | 34  | 26  | 29  | 63  | 57  | 40  | 39  | 39  | 25  |
| 28  | 27  | 45  | 51  | 53  | 50  | 53  | 31  | 40  | 31  |
| 34  | 33  | 42  | 42  | 48  | 57  | 33  | 36  | 41  | 41  |
| 91  | 90  | 90  | 105 | 131 | 111 | 116 | 79  | 112 | 68  |
| 31  | 37  | 38  | 48  | 65  | 55  | 55  | 43  | 54  | 42  |
| 54  | 57  | 47  | 79  | 80  | 77  | 77  | 77  | 79  | 68  |
| 23  | 22  | 29  | 25  | 21  | 27  | 19  | 34  | 20  | 17  |
| 76  | 62  | 75  | 58  | 66  | 90  | 45  | 58  | 68  | 71  |
| 77  | 68  | 65  | 110 | 129 | 104 | 104 | 107 | 125 | 86  |
| 36  | 25  | 36  | 41  | 69  | 54  | 62  | 58  | 70  | 38  |
| 49  | 62  | 76  | 97  | 111 | 94  | 131 | 116 | 121 | 68  |
| 70  | 68  | 75  | 111 | 144 | 144 | 118 | 117 | 142 | 88  |
| 47  | 47  | 41  | 69  | 96  | 74  | 86  | 68  | 73  | 54  |
| 86  | 74  | 80  | 106 | 140 | 109 | 179 | 177 | 189 | 114 |
| 55  | 68  | 53  | 113 | 134 | 115 | 110 | 93  | 104 | 71  |
| 78  | 54  | 74  | 97  | 107 | 97  | 130 | 122 | 140 | 79  |
| 16  | 20  | 13  | 22  | 18  | 11  | 26  | 25  | 19  | 7   |
| 29  | 35  | 27  | 57  | 76  | 47  | 65  | 67  | 60  | 43  |
| 27  | 34  | 23  | 33  | 39  | 32  | 29  | 30  | 38  | 34  |
| 44  | 60  | 56  | 75  | 90  | 85  | 68  | 67  | 77  | 52  |
| 68  | 65  | 92  | 89  | 112 | 93  | 82  | 80  | 88  | 81  |
| 29  | 35  | 42  | 17  | 26  | 39  | 44  | 41  | 43  | 36  |
| 10  | 14  | 23  | 26  | 23  | 32  | 22  | 12  | 23  | 21  |
| 45  | 49  | 52  | 42  | 43  | 46  | 46  | 51  | 68  | 48  |
| 40  | 39  | 38  | 102 | 134 | 94  | 86  | 66  | 95  | 47  |
| 45  | 46  | 59  | 59  | 96  | 83  | 93  | 76  | 82  | 50  |
| 18  | 16  | 25  | 72  | 70  | 67  | 39  | 43  | 55  | 24  |
| 47  | 52  | 61  | 102 | 108 | 100 | 83  | 96  | 93  | 73  |

|     |     |     |     |     |     |     |     |     |     |
|-----|-----|-----|-----|-----|-----|-----|-----|-----|-----|
| 14  | 19  | 26  | 24  | 30  | 32  | 33  | 35  | 27  | 25  |
| 22  | 17  | 26  | 111 | 164 | 97  | 71  | 62  | 78  | 39  |
| 87  | 85  | 91  | 57  | 103 | 85  | 90  | 87  | 104 | 75  |
| 9   | 6   | 16  | 10  | 6   | 9   | 4   | 8   | 5   | 10  |
| 68  | 55  | 59  | 108 | 146 | 127 | 123 | 114 | 119 | 86  |
| 47  | 47  | 64  | 86  | 132 | 118 | 126 | 127 | 121 | 83  |
| 62  | 62  | 46  | 78  | 87  | 82  | 101 | 110 | 108 | 56  |
| 60  | 73  | 76  | 161 | 167 | 146 | 204 | 204 | 184 | 116 |
| 50  | 36  | 51  | 109 | 102 | 66  | 56  | 64  | 73  | 42  |
| 54  | 47  | 49  | 81  | 130 | 57  | 109 | 98  | 102 | 36  |
| 55  | 44  | 71  | 69  | 88  | 64  | 84  | 88  | 85  | 42  |
| 27  | 16  | 23  | 27  | 37  | 20  | 24  | 17  | 17  | 13  |
| 20  | 17  | 27  | 16  | 28  | 15  | 18  | 14  | 25  | 15  |
| 40  | 41  | 42  | 69  | 96  | 55  | 50  | 65  | 70  | 35  |
| 18  | 20  | 21  | 19  | 22  | 7   | 23  | 16  | 16  | 11  |
| 47  | 61  | 56  | 72  | 122 | 68  | 77  | 69  | 75  | 37  |
| 46  | 47  | 41  | 100 | 124 | 81  | 111 | 107 | 148 | 59  |
| 46  | 39  | 44  | 186 | 239 | 205 | 185 | 167 | 183 | 88  |
| 52  | 57  | 62  | 193 | 214 | 206 | 216 | 219 | 187 | 110 |
| 40  | 34  | 40  | 59  | 60  | 62  | 84  | 86  | 103 | 59  |
| 45  | 45  | 48  | 74  | 92  | 92  | 119 | 127 | 122 | 66  |
| 39  | 31  | 37  | 74  | 90  | 97  | 82  | 76  | 94  | 45  |
| 43  | 37  | 45  | 72  | 101 | 72  | 113 | 78  | 96  | 53  |
| 39  | 41  | 50  | 71  | 92  | 65  | 107 | 81  | 94  | 56  |
| 52  | 50  | 58  | 91  | 137 | 114 | 145 | 154 | 146 | 95  |
| 38  | 55  | 57  | 120 | 127 | 152 | 171 | 174 | 162 | 87  |
| 47  | 48  | 39  | 118 | 141 | 123 | 140 | 114 | 171 | 82  |
| 48  | 50  | 42  | 22  | 33  | 35  | 33  | 32  | 28  | 29  |
| 54  | 54  | 67  | 27  | 26  | 35  | 59  | 37  | 49  | 49  |
| 31  | 31  | 41  | 22  | 19  | 20  | 31  | 20  | 26  | 26  |
| 36  | 47  | 46  | 87  | 91  | 96  | 56  | 49  | 58  | 47  |
| 79  | 84  | 94  | 105 | 136 | 134 | 165 | 155 | 154 | 82  |
| 63  | 78  | 74  | 84  | 126 | 125 | 62  | 68  | 76  | 51  |
| 70  | 94  | 101 | 61  | 94  | 91  | 115 | 99  | 103 | 79  |
| 56  | 62  | 59  | 76  | 115 | 92  | 84  | 93  | 100 | 61  |
| 23  | 37  | 44  | 59  | 66  | 70  | 98  | 69  | 72  | 55  |
| 64  | 71  | 59  | 66  | 79  | 75  | 93  | 65  | 96  | 66  |
| 44  | 38  | 34  | 44  | 57  | 45  | 42  | 39  | 41  | 47  |
| 107 | 103 | 128 | 279 | 368 | 316 | 507 | 490 | 519 | 221 |
| 62  | 66  | 73  | 44  | 60  | 68  | 64  | 51  | 56  | 46  |
| 44  | 64  | 56  | 71  | 77  | 69  | 92  | 90  | 103 | 61  |

|    |     |     |     |     |     |     |     |     |     |
|----|-----|-----|-----|-----|-----|-----|-----|-----|-----|
| 37 | 38  | 41  | 45  | 61  | 61  | 52  | 47  | 53  | 26  |
| 41 | 47  | 65  | 92  | 104 | 97  | 66  | 81  | 70  | 54  |
| 50 | 50  | 37  | 51  | 56  | 45  | 58  | 54  | 39  | 38  |
| 90 | 93  | 89  | 127 | 138 | 125 | 152 | 133 | 149 | 83  |
| 94 | 87  | 69  | 61  | 83  | 87  | 90  | 111 | 97  | 74  |
| 37 | 41  | 35  | 33  | 35  | 38  | 43  | 38  | 29  | 35  |
| 56 | 58  | 48  | 76  | 90  | 83  | 74  | 76  | 67  | 51  |
| 61 | 52  | 65  | 53  | 60  | 54  | 65  | 57  | 71  | 54  |
| 43 | 56  | 55  | 55  | 39  | 50  | 75  | 66  | 71  | 57  |
| 24 | 32  | 38  | 52  | 71  | 58  | 66  | 68  | 69  | 27  |
| 23 | 11  | 37  | 88  | 117 | 86  | 98  | 71  | 85  | 34  |
| 38 | 38  | 34  | 178 | 240 | 194 | 236 | 200 | 232 | 92  |
| 13 | 12  | 9   | 37  | 49  | 34  | 29  | 21  | 25  | 12  |
| 7  | 10  | 12  | 17  | 23  | 22  | 21  | 11  | 13  | 5   |
| 17 | 19  | 23  | 34  | 35  | 38  | 41  | 36  | 40  | 29  |
| 18 | 25  | 23  | 45  | 55  | 50  | 69  | 36  | 69  | 29  |
| 12 | 7   | 11  | 10  | 15  | 15  | 17  | 13  | 17  | 12  |
| 32 | 37  | 25  | 53  | 69  | 65  | 59  | 59  | 52  | 41  |
| 28 | 26  | 23  | 96  | 108 | 99  | 108 | 105 | 126 | 58  |
| 91 | 114 | 111 | 68  | 103 | 85  | 88  | 81  | 90  | 103 |
| 42 | 52  | 54  | 45  | 59  | 46  | 69  | 43  | 55  | 46  |
| 56 | 58  | 64  | 86  | 114 | 103 | 100 | 78  | 90  | 71  |
| 60 | 53  | 66  | 86  | 99  | 111 | 91  | 87  | 97  | 77  |
| 49 | 40  | 50  | 32  | 61  | 49  | 43  | 39  | 40  | 43  |
| 33 | 43  | 40  | 120 | 130 | 125 | 137 | 127 | 127 | 67  |
| 32 | 37  | 58  | 56  | 68  | 57  | 62  | 63  | 83  | 53  |
| 21 | 23  | 22  | 10  | 17  | 4   | 14  | 5   | 13  | 16  |
| 32 | 26  | 44  | 50  | 53  | 36  | 47  | 31  | 24  | 18  |
| 35 | 27  | 36  | 65  | 69  | 71  | 53  | 41  | 48  | 32  |
| 39 | 42  | 38  | 56  | 66  | 75  | 54  | 47  | 61  | 46  |
| 13 | 19  | 21  | 12  | 24  | 18  | 14  | 16  | 18  | 8   |
| 54 | 40  | 38  | 44  | 72  | 56  | 46  | 37  | 29  | 38  |
| 53 | 44  | 36  | 42  | 57  | 33  | 38  | 41  | 38  | 27  |
| 34 | 27  | 26  | 31  | 62  | 40  | 20  | 19  | 22  | 18  |
| 23 | 21  | 17  | 41  | 46  | 44  | 31  | 25  | 24  | 24  |
| 66 | 60  | 78  | 92  | 107 | 106 | 117 | 95  | 104 | 74  |
| 43 | 53  | 49  | 73  | 103 | 98  | 109 | 89  | 110 | 62  |
| 14 | 19  | 26  | 15  | 19  | 25  | 32  | 27  | 28  | 19  |
| 46 | 52  | 49  | 71  | 94  | 103 | 45  | 76  | 84  | 53  |
| 48 | 49  | 61  | 77  | 108 | 85  | 100 | 74  | 74  | 59  |
| 2  | 1   | 1   | 9   | 8   | 3   | 1   | 0   | 5   | 0   |

|    |    |     |     |     |     |     |     |     |     |
|----|----|-----|-----|-----|-----|-----|-----|-----|-----|
| 46 | 42 | 43  | 65  | 85  | 76  | 58  | 51  | 53  | 43  |
| 29 | 34 | 43  | 186 | 271 | 263 | 202 | 201 | 235 | 122 |
| 33 | 46 | 46  | 61  | 61  | 63  | 79  | 73  | 79  | 57  |
| 45 | 37 | 41  | 30  | 46  | 48  | 40  | 46  | 53  | 39  |
| 21 | 24 | 32  | 20  | 27  | 35  | 17  | 20  | 22  | 23  |
| 35 | 40 | 36  | 26  | 23  | 19  | 25  | 33  | 27  | 24  |
| 75 | 64 | 74  | 79  | 97  | 84  | 89  | 77  | 89  | 55  |
| 49 | 58 | 52  | 57  | 72  | 70  | 77  | 89  | 92  | 53  |
| 37 | 30 | 42  | 61  | 67  | 68  | 77  | 83  | 68  | 53  |
| 61 | 64 | 72  | 66  | 68  | 56  | 91  | 96  | 101 | 41  |
| 49 | 47 | 60  | 53  | 85  | 73  | 73  | 50  | 58  | 49  |
| 31 | 27 | 17  | 43  | 74  | 46  | 55  | 39  | 44  | 33  |
| 10 | 14 | 16  | 52  | 90  | 57  | 29  | 21  | 39  | 12  |
| 47 | 45 | 49  | 97  | 124 | 98  | 91  | 78  | 96  | 56  |
| 44 | 52 | 41  | 74  | 109 | 105 | 64  | 48  | 80  | 70  |
| 37 | 37 | 41  | 76  | 87  | 81  | 59  | 40  | 64  | 54  |
| 31 | 32 | 41  | 72  | 93  | 87  | 59  | 54  | 78  | 31  |
| 19 | 20 | 16  | 29  | 37  | 18  | 24  | 19  | 23  | 15  |
| 37 | 26 | 38  | 58  | 44  | 53  | 45  | 36  | 38  | 37  |
| 24 | 16 | 28  | 26  | 50  | 36  | 23  | 23  | 23  | 14  |
| 53 | 62 | 76  | 111 | 156 | 122 | 109 | 133 | 127 | 78  |
| 93 | 91 | 102 | 126 | 138 | 146 | 129 | 103 | 149 | 78  |
| 69 | 75 | 67  | 37  | 43  | 47  | 50  | 48  | 47  | 56  |
| 71 | 96 | 71  | 82  | 112 | 106 | 93  | 102 | 96  | 73  |
| 30 | 43 | 26  | 27  | 19  | 29  | 26  | 22  | 25  | 26  |
| 21 | 39 | 38  | 30  | 23  | 49  | 27  | 24  | 33  | 49  |
| 23 | 31 | 23  | 24  | 32  | 23  | 17  | 18  | 23  | 25  |
| 64 | 69 | 85  | 55  | 73  | 84  | 50  | 55  | 61  | 64  |
| 76 | 82 | 76  | 77  | 106 | 95  | 107 | 85  | 128 | 87  |
| 61 | 62 | 83  | 59  | 66  | 68  | 71  | 57  | 57  | 71  |
| 25 | 22 | 19  | 43  | 62  | 43  | 55  | 54  | 45  | 28  |
| 45 | 32 | 39  | 38  | 65  | 34  | 53  | 44  | 51  | 32  |
| 21 | 23 | 27  | 41  | 45  | 39  | 29  | 31  | 28  | 11  |
| 40 | 36 | 54  | 54  | 52  | 38  | 34  | 23  | 27  | 31  |
| 28 | 18 | 23  | 52  | 66  | 48  | 42  | 20  | 42  | 32  |
| 29 | 23 | 29  | 48  | 40  | 37  | 44  | 33  | 27  | 21  |
| 47 | 55 | 52  | 70  | 86  | 88  | 51  | 38  | 47  | 22  |
| 30 | 22 | 48  | 54  | 60  | 63  | 39  | 41  | 65  | 29  |
| 19 | 30 | 21  | 50  | 77  | 38  | 48  | 40  | 44  | 27  |
| 30 | 31 | 48  | 70  | 67  | 71  | 38  | 36  | 45  | 33  |
| 44 | 42 | 57  | 84  | 106 | 86  | 86  | 86  | 85  | 52  |



|    |    |    |     |     |     |     |     |     |    |
|----|----|----|-----|-----|-----|-----|-----|-----|----|
| 52 | 55 | 69 | 145 | 190 | 197 | 172 | 142 | 141 | 99 |
| 38 | 35 | 31 | 81  | 104 | 89  | 79  | 73  | 92  | 59 |
| 33 | 41 | 59 | 149 | 169 | 126 | 176 | 151 | 173 | 75 |
| 36 | 29 | 41 | 76  | 78  | 73  | 83  | 67  | 74  | 45 |
| 26 | 24 | 37 | 51  | 75  | 46  | 48  | 61  | 47  | 33 |
| 4  | 9  | 13 | 26  | 20  | 21  | 26  | 22  | 19  | 9  |
| 22 | 25 | 37 | 64  | 81  | 65  | 40  | 51  | 44  | 39 |
| 11 | 31 | 26 | 32  | 23  | 23  | 24  | 28  | 20  | 22 |
| 27 | 38 | 34 | 88  | 110 | 88  | 96  | 83  | 94  | 44 |
| 20 | 17 | 19 | 14  | 17  | 18  | 16  | 16  | 18  | 20 |
| 22 | 21 | 20 | 19  | 25  | 20  | 22  | 11  | 22  | 21 |
| 22 | 13 | 17 | 43  | 44  | 29  | 49  | 28  | 25  | 29 |
| 39 | 43 | 36 | 77  | 91  | 97  | 79  | 56  | 64  | 44 |
| 37 | 45 | 37 | 97  | 104 | 112 | 78  | 78  | 70  | 50 |
| 60 | 67 | 73 | 77  | 142 | 101 | 114 | 76  | 98  | 71 |
| 28 | 38 | 39 | 50  | 51  | 71  | 62  | 45  | 59  | 48 |
| 35 | 45 | 44 | 103 | 135 | 97  | 105 | 77  | 104 | 44 |
| 35 | 31 | 37 | 57  | 72  | 65  | 61  | 48  | 43  | 32 |
| 21 | 26 | 41 | 64  | 87  | 53  | 48  | 39  | 68  | 35 |
| 19 | 23 | 21 | 34  | 40  | 38  | 24  | 29  | 39  | 21 |
| 29 | 23 | 25 | 84  | 93  | 78  | 76  | 55  | 61  | 40 |
| 54 | 56 | 79 | 192 | 223 | 197 | 188 | 163 | 144 | 93 |
| 32 | 45 | 38 | 40  | 38  | 35  | 50  | 33  | 39  | 30 |
| 12 | 15 | 20 | 33  | 55  | 30  | 26  | 27  | 27  | 19 |
| 60 | 67 | 53 | 62  | 61  | 71  | 65  | 72  | 72  | 59 |
| 49 | 55 | 64 | 83  | 137 | 113 | 109 | 104 | 101 | 74 |
| 49 | 58 | 59 | 53  | 54  | 51  | 65  | 51  | 37  | 42 |
| 38 | 30 | 44 | 79  | 96  | 84  | 91  | 68  | 80  | 56 |
| 15 | 25 | 31 | 18  | 36  | 18  | 15  | 19  | 25  | 13 |
| 25 | 25 | 34 | 53  | 62  | 54  | 39  | 38  | 70  | 25 |
| 41 | 57 | 62 | 52  | 53  | 38  | 54  | 61  | 55  | 53 |
| 56 | 60 | 66 | 88  | 109 | 93  | 115 | 109 | 125 | 68 |
| 31 | 37 | 42 | 37  | 40  | 36  | 39  | 21  | 42  | 38 |
| 23 | 24 | 27 | 26  | 36  | 23  | 27  | 25  | 26  | 21 |
| 70 | 67 | 73 | 96  | 102 | 104 | 91  | 115 | 121 | 82 |
| 37 | 46 | 55 | 32  | 39  | 38  | 33  | 21  | 26  | 50 |
| 75 | 75 | 94 | 73  | 115 | 109 | 126 | 137 | 122 | 89 |
| 47 | 42 | 55 | 75  | 83  | 87  | 58  | 54  | 34  | 42 |
| 47 | 42 | 34 | 48  | 60  | 47  | 44  | 29  | 49  | 45 |
| 75 | 63 | 59 | 75  | 114 | 110 | 89  | 88  | 79  | 57 |
| 35 | 25 | 25 | 28  | 29  | 24  | 26  | 17  | 20  | 13 |

|     |    |     |     |     |     |     |     |     |     |
|-----|----|-----|-----|-----|-----|-----|-----|-----|-----|
| 27  | 40 | 46  | 34  | 40  | 35  | 37  | 36  | 47  | 25  |
| 51  | 45 | 72  | 63  | 85  | 69  | 101 | 84  | 106 | 67  |
| 32  | 40 | 41  | 41  | 43  | 48  | 41  | 43  | 43  | 27  |
| 59  | 48 | 67  | 31  | 45  | 39  | 38  | 37  | 32  | 43  |
| 45  | 46 | 54  | 31  | 61  | 42  | 53  | 33  | 59  | 37  |
| 35  | 40 | 44  | 52  | 35  | 43  | 49  | 52  | 51  | 38  |
| 36  | 30 | 28  | 8   | 3   | 10  | 19  | 21  | 20  | 18  |
| 25  | 30 | 35  | 27  | 24  | 29  | 40  | 30  | 33  | 30  |
| 42  | 35 | 38  | 18  | 18  | 14  | 30  | 26  | 21  | 30  |
| 69  | 73 | 69  | 76  | 85  | 89  | 61  | 56  | 85  | 55  |
| 22  | 25 | 38  | 24  | 38  | 28  | 26  | 21  | 28  | 20  |
| 50  | 52 | 51  | 28  | 38  | 32  | 25  | 36  | 41  | 44  |
| 68  | 58 | 77  | 55  | 68  | 56  | 48  | 45  | 56  | 77  |
| 32  | 34 | 45  | 26  | 44  | 46  | 45  | 38  | 59  | 35  |
| 71  | 81 | 74  | 70  | 82  | 75  | 96  | 85  | 107 | 79  |
| 53  | 65 | 71  | 70  | 81  | 86  | 81  | 71  | 94  | 46  |
| 41  | 39 | 37  | 40  | 76  | 56  | 44  | 53  | 70  | 57  |
| 115 | 99 | 118 | 143 | 188 | 159 | 235 | 229 | 231 | 146 |
| 39  | 50 | 61  | 64  | 77  | 53  | 51  | 51  | 51  | 69  |
| 29  | 30 | 26  | 65  | 73  | 69  | 52  | 52  | 54  | 43  |
| 21  | 29 | 23  | 25  | 26  | 32  | 30  | 27  | 29  | 18  |
| 17  | 26 | 19  | 18  | 31  | 30  | 18  | 25  | 20  | 18  |
| 27  | 23 | 20  | 16  | 20  | 20  | 26  | 28  | 26  | 23  |
| 60  | 57 | 69  | 161 | 187 | 176 | 148 | 117 | 145 | 77  |
| 79  | 87 | 93  | 88  | 145 | 113 | 110 | 120 | 154 | 85  |
| 42  | 52 | 58  | 173 | 209 | 171 | 202 | 178 | 184 | 100 |
| 27  | 23 | 34  | 52  | 60  | 44  | 38  | 39  | 37  | 19  |
| 28  | 30 | 47  | 50  | 54  | 75  | 41  | 33  | 42  | 41  |
| 12  | 14 | 9   | 33  | 26  | 33  | 17  | 24  | 28  | 16  |
| 18  | 19 | 18  | 19  | 18  | 15  | 11  | 14  | 22  | 17  |
| 12  | 8  | 18  | 15  | 26  | 18  | 16  | 17  | 17  | 15  |
| 44  | 43 | 42  | 54  | 97  | 72  | 75  | 64  | 75  | 62  |
| 25  | 12 | 20  | 40  | 40  | 40  | 41  | 27  | 38  | 28  |
| 52  | 38 | 49  | 99  | 135 | 141 | 106 | 85  | 94  | 47  |
| 11  | 13 | 16  | 28  | 35  | 31  | 27  | 13  | 20  | 12  |
| 0   | 4  | 3   | 2   | 3   | 4   | 2   | 1   | 3   | 0   |
| 0   | 10 | 3   | 5   | 1   | 4   | 1   | 3   | 3   | 9   |
| 8   | 9  | 7   | 7   | 10  | 15  | 17  | 10  | 22  | 11  |
| 29  | 53 | 37  | 33  | 25  | 37  | 34  | 22  | 43  | 43  |
| 6   | 13 | 7   | 8   | 7   | 6   | 11  | 6   | 7   | 7   |
| 40  | 45 | 29  | 21  | 12  | 20  | 30  | 11  | 31  | 52  |

|    |     |     |     |     |     |     |     |     |     |
|----|-----|-----|-----|-----|-----|-----|-----|-----|-----|
| 6  | 6   | 11  | 5   | 3   | 5   | 7   | 9   | 8   | 6   |
| 20 | 11  | 19  | 16  | 21  | 14  | 23  | 22  | 25  | 12  |
| 20 | 38  | 23  | 29  | 39  | 37  | 33  | 39  | 31  | 28  |
| 20 | 12  | 20  | 12  | 13  | 14  | 18  | 12  | 12  | 12  |
| 53 | 49  | 51  | 164 | 210 | 169 | 245 | 222 | 222 | 85  |
| 44 | 65  | 69  | 160 | 155 | 161 | 203 | 164 | 215 | 91  |
| 46 | 34  | 32  | 83  | 97  | 85  | 79  | 80  | 78  | 42  |
| 77 | 67  | 67  | 176 | 232 | 251 | 220 | 202 | 236 | 93  |
| 39 | 47  | 63  | 165 | 172 | 156 | 190 | 174 | 186 | 94  |
| 48 | 41  | 35  | 170 | 189 | 146 | 230 | 231 | 262 | 73  |
| 50 | 58  | 39  | 127 | 179 | 139 | 156 | 152 | 152 | 83  |
| 32 | 24  | 30  | 79  | 96  | 104 | 113 | 108 | 113 | 44  |
| 82 | 75  | 91  | 135 | 167 | 126 | 235 | 238 | 279 | 114 |
| 51 | 48  | 57  | 164 | 254 | 171 | 260 | 279 | 269 | 105 |
| 95 | 101 | 105 | 51  | 66  | 66  | 66  | 57  | 74  | 78  |
| 20 | 18  | 17  | 29  | 23  | 22  | 34  | 16  | 14  | 21  |
| 77 | 77  | 81  | 109 | 135 | 127 | 100 | 92  | 115 | 66  |
| 37 | 39  | 40  | 57  | 71  | 63  | 42  | 40  | 51  | 45  |
| 55 | 28  | 66  | 42  | 73  | 69  | 56  | 52  | 48  | 48  |
| 35 | 34  | 50  | 60  | 73  | 63  | 31  | 47  | 37  | 38  |
| 43 | 54  | 31  | 135 | 145 | 121 | 75  | 62  | 105 | 56  |
| 27 | 35  | 30  | 75  | 96  | 66  | 31  | 29  | 25  | 29  |
| 19 | 21  | 35  | 46  | 41  | 46  | 39  | 42  | 48  | 21  |
| 47 | 54  | 51  | 35  | 51  | 43  | 54  | 54  | 55  | 47  |
| 20 | 18  | 24  | 25  | 32  | 17  | 21  | 13  | 27  | 26  |
| 55 | 49  | 49  | 41  | 64  | 45  | 57  | 53  | 50  | 51  |
| 29 | 30  | 32  | 71  | 100 | 69  | 34  | 39  | 39  | 26  |
| 28 | 34  | 21  | 55  | 77  | 46  | 37  | 37  | 47  | 31  |
| 25 | 40  | 44  | 67  | 73  | 64  | 59  | 47  | 60  | 38  |
| 36 | 50  | 46  | 69  | 98  | 110 | 37  | 42  | 47  | 48  |
| 15 | 25  | 39  | 63  | 65  | 43  | 42  | 34  | 29  | 31  |
| 19 | 27  | 27  | 48  | 56  | 55  | 29  | 32  | 34  | 19  |
| 43 | 44  | 53  | 78  | 93  | 86  | 78  | 74  | 102 | 51  |
| 52 | 63  | 57  | 120 | 172 | 151 | 127 | 117 | 131 | 80  |
| 21 | 18  | 26  | 40  | 42  | 41  | 42  | 31  | 27  | 23  |
| 55 | 42  | 56  | 99  | 129 | 119 | 91  | 87  | 123 | 52  |
| 25 | 27  | 25  | 40  | 59  | 44  | 48  | 44  | 51  | 44  |
| 36 | 28  | 40  | 57  | 71  | 50  | 44  | 43  | 42  | 42  |
| 22 | 24  | 20  | 44  | 42  | 52  | 55  | 44  | 49  | 28  |
| 28 | 32  | 25  | 71  | 87  | 60  | 47  | 45  | 47  | 23  |
| 35 | 29  | 43  | 45  | 54  | 39  | 33  | 43  | 35  | 36  |

|     |     |     |     |     |     |     |     |     |     |
|-----|-----|-----|-----|-----|-----|-----|-----|-----|-----|
| 9   | 11  | 15  | 30  | 23  | 15  | 22  | 18  | 19  | 10  |
| 60  | 38  | 56  | 64  | 82  | 69  | 61  | 53  | 57  | 51  |
| 23  | 26  | 22  | 36  | 54  | 38  | 34  | 20  | 16  | 18  |
| 34  | 34  | 48  | 61  | 101 | 83  | 78  | 62  | 83  | 59  |
| 46  | 51  | 48  | 100 | 134 | 117 | 106 | 101 | 107 | 37  |
| 42  | 26  | 24  | 40  | 56  | 48  | 52  | 46  | 50  | 35  |
| 69  | 58  | 71  | 87  | 108 | 110 | 121 | 90  | 98  | 63  |
| 117 | 111 | 119 | 208 | 270 | 216 | 241 | 197 | 226 | 118 |
| 72  | 52  | 66  | 133 | 141 | 124 | 174 | 184 | 185 | 84  |
| 31  | 40  | 26  | 50  | 80  | 56  | 64  | 45  | 66  | 44  |
| 32  | 47  | 38  | 60  | 86  | 84  | 47  | 43  | 64  | 39  |
| 41  | 45  | 43  | 49  | 63  | 57  | 66  | 56  | 71  | 40  |
| 26  | 27  | 47  | 67  | 91  | 72  | 56  | 68  | 60  | 45  |
| 27  | 33  | 40  | 30  | 36  | 41  | 43  | 58  | 66  | 37  |
| 51  | 49  | 57  | 72  | 83  | 77  | 114 | 95  | 114 | 66  |
| 41  | 34  | 31  | 52  | 46  | 36  | 43  | 35  | 32  | 34  |
| 15  | 11  | 8   | 16  | 12  | 22  | 15  | 16  | 19  | 7   |
| 57  | 66  | 59  | 70  | 85  | 71  | 89  | 68  | 97  | 67  |
| 56  | 51  | 59  | 101 | 150 | 112 | 130 | 112 | 128 | 70  |
| 19  | 25  | 30  | 35  | 45  | 31  | 61  | 45  | 55  | 28  |
| 63  | 62  | 62  | 72  | 84  | 88  | 60  | 54  | 67  | 54  |
| 38  | 31  | 47  | 44  | 45  | 38  | 36  | 25  | 25  | 33  |
| 48  | 46  | 47  | 46  | 54  | 45  | 44  | 39  | 48  | 52  |
| 74  | 69  | 61  | 55  | 60  | 65  | 69  | 63  | 58  | 53  |
| 11  | 6   | 9   | 9   | 4   | 5   | 7   | 9   | 11  | 2   |
| 18  | 15  | 20  | 29  | 48  | 38  | 27  | 25  | 23  | 19  |
| 26  | 18  | 37  | 72  | 89  | 47  | 59  | 44  | 49  | 24  |
| 12  | 13  | 11  | 6   | 9   | 4   | 3   | 10  | 7   | 11  |
| 18  | 12  | 14  | 24  | 18  | 22  | 24  | 24  | 40  | 15  |
| 16  | 14  | 10  | 28  | 50  | 37  | 24  | 24  | 30  | 13  |
| 5   | 10  | 8   | 22  | 28  | 16  | 13  | 11  | 13  | 4   |
| 38  | 31  | 36  | 80  | 93  | 82  | 70  | 59  | 60  | 41  |
| 29  | 22  | 36  | 62  | 83  | 57  | 46  | 56  | 55  | 35  |
| 7   | 14  | 7   | 17  | 26  | 20  | 24  | 22  | 12  | 8   |
| 87  | 73  | 76  | 167 | 190 | 185 | 217 | 179 | 207 | 76  |
| 48  | 35  | 37  | 96  | 121 | 117 | 112 | 98  | 120 | 60  |
| 29  | 51  | 39  | 31  | 49  | 53  | 51  | 48  | 46  | 32  |
| 81  | 76  | 81  | 80  | 117 | 108 | 156 | 118 | 122 | 109 |
| 19  | 16  | 17  | 15  | 16  | 10  | 17  | 18  | 14  | 15  |
| 88  | 78  | 90  | 96  | 100 | 106 | 139 | 152 | 156 | 104 |
| 19  | 18  | 15  | 15  | 19  | 14  | 11  | 13  | 18  | 12  |

|     |     |     |     |     |     |     |     |     |     |
|-----|-----|-----|-----|-----|-----|-----|-----|-----|-----|
| 35  | 41  | 33  | 51  | 64  | 75  | 55  | 40  | 57  | 37  |
| 52  | 42  | 47  | 59  | 79  | 58  | 66  | 72  | 71  | 52  |
| 28  | 53  | 46  | 87  | 96  | 100 | 87  | 71  | 72  | 51  |
| 75  | 79  | 66  | 90  | 95  | 86  | 105 | 67  | 94  | 66  |
| 45  | 57  | 67  | 85  | 95  | 94  | 104 | 108 | 82  | 45  |
| 82  | 53  | 64  | 59  | 87  | 69  | 62  | 56  | 54  | 59  |
| 66  | 55  | 59  | 74  | 64  | 57  | 49  | 43  | 49  | 50  |
| 66  | 76  | 71  | 87  | 98  | 84  | 87  | 60  | 76  | 60  |
| 33  | 34  | 32  | 25  | 35  | 30  | 32  | 24  | 26  | 29  |
| 55  | 66  | 73  | 49  | 65  | 54  | 37  | 38  | 51  | 56  |
| 39  | 31  | 51  | 42  | 57  | 39  | 38  | 27  | 47  | 36  |
| 15  | 7   | 15  | 24  | 24  | 24  | 21  | 18  | 18  | 10  |
| 29  | 27  | 29  | 42  | 54  | 38  | 33  | 28  | 30  | 23  |
| 7   | 6   | 9   | 20  | 28  | 27  | 10  | 13  | 9   | 11  |
| 30  | 32  | 34  | 47  | 49  | 51  | 51  | 39  | 44  | 32  |
| 59  | 53  | 57  | 174 | 168 | 204 | 123 | 127 | 150 | 75  |
| 32  | 38  | 34  | 31  | 32  | 30  | 17  | 20  | 13  | 22  |
| 71  | 53  | 65  | 32  | 50  | 47  | 19  | 19  | 19  | 16  |
| 19  | 13  | 16  | 58  | 58  | 52  | 35  | 37  | 31  | 19  |
| 42  | 37  | 42  | 69  | 86  | 68  | 178 | 165 | 153 | 85  |
| 28  | 23  | 36  | 49  | 53  | 47  | 50  | 48  | 55  | 40  |
| 21  | 32  | 37  | 40  | 40  | 28  | 43  | 33  | 33  | 35  |
| 63  | 75  | 76  | 62  | 108 | 99  | 58  | 40  | 57  | 48  |
| 63  | 83  | 65  | 74  | 108 | 89  | 89  | 92  | 109 | 53  |
| 92  | 107 | 107 | 147 | 209 | 163 | 152 | 138 | 161 | 102 |
| 25  | 27  | 31  | 24  | 36  | 34  | 26  | 32  | 31  | 28  |
| 153 | 100 | 145 | 171 | 228 | 189 | 145 | 125 | 153 | 96  |
| 26  | 40  | 30  | 38  | 53  | 31  | 49  | 46  | 44  | 27  |
| 37  | 36  | 38  | 28  | 38  | 35  | 25  | 34  | 22  | 27  |
| 33  | 30  | 37  | 19  | 22  | 19  | 20  | 15  | 24  | 29  |
| 34  | 24  | 35  | 25  | 32  | 26  | 46  | 48  | 52  | 47  |
| 37  | 37  | 50  | 28  | 29  | 33  | 38  | 38  | 27  | 27  |
| 32  | 48  | 43  | 61  | 63  | 52  | 65  | 54  | 78  | 30  |
| 70  | 70  | 67  | 51  | 71  | 57  | 69  | 48  | 62  | 53  |
| 38  | 42  | 55  | 49  | 61  | 67  | 49  | 50  | 42  | 44  |
| 24  | 28  | 40  | 18  | 34  | 18  | 22  | 22  | 19  | 23  |
| 27  | 17  | 37  | 25  | 41  | 30  | 33  | 27  | 34  | 25  |
| 26  | 25  | 36  | 33  | 27  | 29  | 25  | 31  | 25  | 20  |
| 57  | 73  | 60  | 110 | 99  | 105 | 97  | 85  | 110 | 84  |
| 37  | 31  | 38  | 88  | 109 | 73  | 69  | 68  | 72  | 36  |
| 29  | 29  | 30  | 44  | 41  | 53  | 38  | 34  | 54  | 32  |

|    |    |    |     |     |     |     |     |     |     |
|----|----|----|-----|-----|-----|-----|-----|-----|-----|
| 38 | 53 | 54 | 67  | 64  | 47  | 84  | 55  | 81  | 49  |
| 49 | 44 | 63 | 49  | 73  | 55  | 70  | 58  | 45  | 56  |
| 37 | 31 | 43 | 59  | 82  | 86  | 82  | 63  | 59  | 35  |
| 53 | 46 | 31 | 145 | 234 | 175 | 175 | 162 | 202 | 91  |
| 54 | 39 | 50 | 119 | 149 | 97  | 151 | 113 | 115 | 62  |
| 50 | 62 | 55 | 78  | 103 | 85  | 96  | 87  | 89  | 64  |
| 16 | 29 | 21 | 38  | 58  | 46  | 41  | 36  | 41  | 17  |
| 54 | 71 | 58 | 140 | 161 | 148 | 141 | 132 | 126 | 95  |
| 36 | 36 | 44 | 50  | 76  | 55  | 53  | 46  | 57  | 43  |
| 34 | 38 | 38 | 39  | 41  | 40  | 31  | 44  | 26  | 31  |
| 18 | 22 | 30 | 27  | 22  | 19  | 23  | 24  | 31  | 22  |
| 43 | 31 | 43 | 75  | 99  | 100 | 57  | 46  | 74  | 64  |
| 51 | 46 | 56 | 92  | 134 | 128 | 124 | 108 | 113 | 58  |
| 24 | 23 | 29 | 26  | 39  | 36  | 40  | 36  | 44  | 29  |
| 67 | 79 | 63 | 127 | 138 | 113 | 129 | 109 | 105 | 73  |
| 29 | 25 | 25 | 27  | 21  | 18  | 27  | 16  | 35  | 16  |
| 21 | 24 | 24 | 27  | 46  | 10  | 34  | 27  | 28  | 18  |
| 31 | 28 | 35 | 66  | 100 | 54  | 52  | 71  | 61  | 37  |
| 39 | 40 | 36 | 56  | 52  | 60  | 64  | 52  | 47  | 40  |
| 28 | 28 | 27 | 58  | 80  | 58  | 50  | 40  | 58  | 21  |
| 47 | 54 | 51 | 84  | 77  | 64  | 72  | 80  | 81  | 49  |
| 38 | 43 | 42 | 78  | 99  | 72  | 50  | 64  | 65  | 33  |
| 35 | 30 | 36 | 33  | 55  | 41  | 28  | 26  | 45  | 31  |
| 29 | 23 | 31 | 13  | 19  | 22  | 14  | 21  | 20  | 26  |
| 22 | 30 | 18 | 37  | 38  | 32  | 38  | 42  | 47  | 26  |
| 57 | 65 | 59 | 165 | 210 | 157 | 285 | 254 | 240 | 97  |
| 43 | 34 | 53 | 38  | 63  | 45  | 77  | 64  | 56  | 37  |
| 22 | 32 | 33 | 23  | 32  | 26  | 38  | 26  | 35  | 14  |
| 36 | 36 | 26 | 27  | 27  | 22  | 20  | 17  | 21  | 37  |
| 88 | 91 | 99 | 160 | 192 | 192 | 165 | 150 | 172 | 130 |
| 32 | 44 | 53 | 32  | 56  | 32  | 58  | 52  | 64  | 47  |
| 83 | 91 | 88 | 90  | 129 | 103 | 120 | 108 | 102 | 61  |
| 40 | 37 | 48 | 21  | 48  | 34  | 42  | 34  | 43  | 39  |
| 56 | 65 | 59 | 65  | 137 | 90  | 107 | 101 | 113 | 50  |
| 29 | 31 | 19 | 47  | 41  | 39  | 74  | 77  | 75  | 48  |
| 63 | 58 | 74 | 127 | 178 | 138 | 133 | 124 | 135 | 105 |
| 29 | 30 | 31 | 40  | 62  | 31  | 38  | 32  | 42  | 27  |
| 54 | 50 | 51 | 96  | 122 | 101 | 127 | 112 | 112 | 53  |
| 51 | 57 | 44 | 96  | 111 | 84  | 82  | 76  | 93  | 44  |
| 51 | 48 | 53 | 94  | 140 | 107 | 140 | 117 | 140 | 71  |
| 10 | 8  | 10 | 13  | 16  | 16  | 18  | 16  | 16  | 14  |

|    |    |     |     |     |     |     |     |     |     |
|----|----|-----|-----|-----|-----|-----|-----|-----|-----|
| 35 | 26 | 29  | 34  | 43  | 35  | 28  | 24  | 34  | 19  |
| 52 | 66 | 74  | 75  | 80  | 75  | 74  | 92  | 99  | 55  |
| 28 | 30 | 30  | 43  | 56  | 42  | 39  | 37  | 35  | 22  |
| 35 | 45 | 32  | 57  | 110 | 90  | 138 | 92  | 129 | 65  |
| 34 | 27 | 27  | 47  | 58  | 62  | 50  | 38  | 49  | 23  |
| 39 | 41 | 45  | 57  | 75  | 59  | 56  | 48  | 51  | 46  |
| 41 | 43 | 48  | 65  | 87  | 62  | 70  | 68  | 74  | 58  |
| 80 | 71 | 82  | 180 | 224 | 212 | 215 | 218 | 207 | 125 |
| 55 | 37 | 58  | 93  | 119 | 105 | 84  | 102 | 115 | 77  |
| 63 | 70 | 88  | 98  | 153 | 113 | 97  | 93  | 104 | 95  |
| 55 | 43 | 61  | 74  | 114 | 92  | 83  | 57  | 71  | 49  |
| 19 | 17 | 39  | 23  | 40  | 23  | 34  | 22  | 37  | 26  |
| 72 | 69 | 72  | 132 | 137 | 126 | 88  | 80  | 102 | 64  |
| 19 | 29 | 20  | 37  | 30  | 30  | 11  | 16  | 24  | 17  |
| 21 | 26 | 15  | 18  | 12  | 15  | 12  | 11  | 14  | 12  |
| 61 | 69 | 79  | 75  | 69  | 61  | 72  | 68  | 88  | 69  |
| 37 | 53 | 56  | 68  | 94  | 74  | 69  | 62  | 71  | 55  |
| 52 | 67 | 72  | 36  | 49  | 39  | 80  | 58  | 70  | 58  |
| 46 | 38 | 51  | 33  | 64  | 29  | 46  | 46  | 38  | 35  |
| 62 | 81 | 72  | 124 | 129 | 151 | 132 | 141 | 142 | 116 |
| 77 | 92 | 88  | 47  | 50  | 53  | 79  | 74  | 74  | 72  |
| 21 | 16 | 19  | 19  | 16  | 11  | 26  | 18  | 23  | 22  |
| 73 | 74 | 93  | 31  | 81  | 58  | 66  | 56  | 58  | 51  |
| 26 | 27 | 36  | 61  | 69  | 68  | 36  | 37  | 36  | 40  |
| 36 | 44 | 42  | 59  | 63  | 62  | 75  | 85  | 58  | 48  |
| 46 | 54 | 58  | 77  | 82  | 80  | 85  | 83  | 86  | 61  |
| 14 | 20 | 25  | 18  | 19  | 13  | 13  | 18  | 23  | 14  |
| 28 | 42 | 59  | 41  | 41  | 48  | 36  | 36  | 49  | 38  |
| 49 | 62 | 56  | 54  | 93  | 79  | 68  | 60  | 60  | 50  |
| 24 | 22 | 29  | 33  | 46  | 44  | 32  | 39  | 36  | 32  |
| 74 | 92 | 83  | 69  | 87  | 87  | 108 | 81  | 80  | 96  |
| 39 | 34 | 44  | 31  | 35  | 36  | 34  | 34  | 43  | 47  |
| 57 | 59 | 46  | 31  | 58  | 55  | 59  | 60  | 63  | 56  |
| 54 | 54 | 62  | 48  | 51  | 51  | 59  | 45  | 49  | 46  |
| 70 | 60 | 66  | 71  | 91  | 82  | 74  | 85  | 87  | 71  |
| 91 | 68 | 85  | 53  | 70  | 47  | 107 | 119 | 124 | 84  |
| 72 | 76 | 97  | 47  | 86  | 67  | 96  | 90  | 79  | 74  |
| 38 | 37 | 44  | 37  | 52  | 39  | 42  | 36  | 34  | 28  |
| 58 | 49 | 69  | 50  | 75  | 58  | 61  | 37  | 65  | 44  |
| 95 | 97 | 116 | 124 | 141 | 104 | 118 | 92  | 123 | 83  |
| 12 | 15 | 11  | 13  | 18  | 16  | 22  | 17  | 16  | 10  |

|    |    |    |     |     |     |     |     |     |     |
|----|----|----|-----|-----|-----|-----|-----|-----|-----|
| 57 | 81 | 85 | 63  | 72  | 76  | 86  | 69  | 78  | 54  |
| 62 | 49 | 63 | 98  | 99  | 97  | 125 | 126 | 119 | 80  |
| 41 | 30 | 34 | 37  | 50  | 50  | 34  | 38  | 48  | 20  |
| 36 | 35 | 52 | 25  | 18  | 32  | 21  | 27  | 22  | 30  |
| 71 | 72 | 86 | 100 | 130 | 125 | 104 | 102 | 117 | 96  |
| 47 | 38 | 48 | 65  | 87  | 92  | 92  | 66  | 85  | 69  |
| 48 | 42 | 62 | 79  | 98  | 87  | 71  | 54  | 57  | 33  |
| 23 | 17 | 31 | 23  | 45  | 27  | 22  | 27  | 27  | 21  |
| 37 | 30 | 40 | 45  | 48  | 40  | 46  | 35  | 31  | 22  |
| 42 | 42 | 52 | 58  | 78  | 49  | 60  | 51  | 48  | 50  |
| 0  | 0  | 1  | 0   | 0   | 0   | 0   | 0   | 0   | 0   |
| 33 | 43 | 36 | 53  | 66  | 61  | 68  | 62  | 69  | 36  |
| 37 | 35 | 36 | 50  | 56  | 41  | 36  | 32  | 39  | 26  |
| 34 | 38 | 40 | 43  | 50  | 39  | 37  | 57  | 48  | 32  |
| 51 | 72 | 82 | 104 | 140 | 116 | 133 | 136 | 158 | 86  |
| 45 | 74 | 59 | 98  | 128 | 128 | 76  | 75  | 75  | 63  |
| 23 | 38 | 37 | 45  | 68  | 40  | 48  | 34  | 53  | 31  |
| 75 | 67 | 90 | 106 | 159 | 145 | 159 | 135 | 153 | 108 |
| 35 | 23 | 21 | 37  | 62  | 53  | 35  | 42  | 44  | 35  |
| 79 | 92 | 66 | 164 | 195 | 170 | 156 | 159 | 166 | 114 |
| 18 | 20 | 20 | 49  | 57  | 48  | 51  | 33  | 46  | 18  |
| 21 | 19 | 20 | 31  | 30  | 32  | 21  | 15  | 10  | 14  |
| 20 | 21 | 21 | 53  | 89  | 67  | 38  | 32  | 34  | 16  |
| 79 | 84 | 71 | 359 | 460 | 410 | 256 | 218 | 239 | 132 |
| 67 | 63 | 62 | 77  | 119 | 91  | 82  | 68  | 79  | 58  |
| 23 | 31 | 40 | 28  | 44  | 25  | 55  | 40  | 37  | 37  |
| 15 | 22 | 21 | 14  | 16  | 12  | 18  | 12  | 19  | 15  |
| 14 | 13 | 22 | 11  | 9   | 10  | 14  | 9   | 8   | 12  |
| 19 | 17 | 17 | 16  | 43  | 31  | 28  | 25  | 21  | 15  |
| 21 | 22 | 28 | 62  | 91  | 66  | 74  | 67  | 81  | 42  |
| 24 | 24 | 34 | 48  | 36  | 43  | 31  | 19  | 36  | 19  |
| 42 | 36 | 41 | 76  | 80  | 61  | 86  | 95  | 89  | 40  |
| 10 | 11 | 4  | 20  | 43  | 28  | 14  | 14  | 16  | 11  |
| 18 | 25 | 34 | 27  | 57  | 46  | 37  | 28  | 43  | 21  |
| 55 | 54 | 56 | 144 | 185 | 128 | 105 | 91  | 127 | 60  |
| 30 | 31 | 32 | 34  | 43  | 34  | 25  | 13  | 35  | 27  |
| 13 | 8  | 21 | 19  | 28  | 29  | 18  | 9   | 11  | 12  |
| 15 | 13 | 18 | 28  | 38  | 43  | 30  | 31  | 22  | 21  |
| 34 | 40 | 32 | 81  | 141 | 92  | 35  | 44  | 76  | 34  |
| 29 | 25 | 34 | 67  | 120 | 94  | 100 | 99  | 108 | 60  |
| 38 | 44 | 47 | 68  | 93  | 79  | 77  | 67  | 67  | 58  |



|    |    |     |     |     |     |     |     |     |     |
|----|----|-----|-----|-----|-----|-----|-----|-----|-----|
| 80 | 74 | 64  | 82  | 125 | 108 | 84  | 78  | 109 | 43  |
| 47 | 37 | 44  | 46  | 50  | 45  | 45  | 45  | 51  | 41  |
| 23 | 27 | 20  | 36  | 25  | 19  | 17  | 21  | 18  | 28  |
| 9  | 5  | 3   | 3   | 12  | 7   | 6   | 4   | 4   | 6   |
| 33 | 40 | 43  | 97  | 131 | 97  | 128 | 100 | 110 | 66  |
| 8  | 7  | 4   | 34  | 30  | 26  | 29  | 16  | 18  | 9   |
| 5  | 9  | 6   | 11  | 12  | 6   | 6   | 12  | 17  | 8   |
| 32 | 34 | 42  | 50  | 74  | 47  | 58  | 43  | 55  | 50  |
| 38 | 36 | 40  | 54  | 64  | 67  | 64  | 47  | 42  | 42  |
| 33 | 18 | 34  | 55  | 79  | 61  | 66  | 59  | 53  | 33  |
| 18 | 30 | 17  | 13  | 12  | 12  | 18  | 15  | 12  | 11  |
| 22 | 19 | 18  | 65  | 88  | 68  | 67  | 57  | 50  | 23  |
| 15 | 18 | 31  | 26  | 32  | 26  | 27  | 28  | 25  | 27  |
| 36 | 57 | 46  | 26  | 27  | 24  | 35  | 37  | 40  | 35  |
| 62 | 54 | 40  | 64  | 94  | 83  | 188 | 181 | 188 | 89  |
| 56 | 43 | 54  | 62  | 83  | 59  | 63  | 49  | 64  | 43  |
| 85 | 74 | 78  | 100 | 111 | 96  | 109 | 111 | 144 | 69  |
| 49 | 62 | 68  | 66  | 80  | 87  | 126 | 120 | 129 | 77  |
| 54 | 56 | 45  | 66  | 66  | 78  | 70  | 82  | 76  | 56  |
| 48 | 48 | 58  | 25  | 38  | 38  | 54  | 46  | 48  | 45  |
| 63 | 65 | 74  | 33  | 46  | 47  | 53  | 56  | 60  | 44  |
| 55 | 48 | 52  | 11  | 17  | 14  | 35  | 30  | 44  | 51  |
| 74 | 64 | 65  | 126 | 183 | 178 | 241 | 219 | 270 | 130 |
| 52 | 50 | 38  | 39  | 39  | 38  | 48  | 49  | 64  | 47  |
| 37 | 34 | 53  | 122 | 154 | 127 | 129 | 105 | 121 | 57  |
| 27 | 30 | 29  | 39  | 54  | 49  | 28  | 38  | 27  | 29  |
| 28 | 23 | 34  | 34  | 39  | 33  | 29  | 31  | 39  | 30  |
| 70 | 81 | 87  | 89  | 106 | 92  | 81  | 110 | 72  | 61  |
| 43 | 39 | 33  | 45  | 61  | 50  | 45  | 39  | 44  | 27  |
| 43 | 45 | 47  | 72  | 95  | 68  | 67  | 74  | 80  | 49  |
| 38 | 51 | 42  | 40  | 58  | 53  | 58  | 49  | 54  | 57  |
| 58 | 72 | 73  | 80  | 116 | 77  | 96  | 84  | 110 | 63  |
| 65 | 54 | 59  | 91  | 118 | 103 | 157 | 127 | 129 | 78  |
| 35 | 41 | 52  | 40  | 58  | 51  | 61  | 52  | 43  | 34  |
| 48 | 50 | 61  | 55  | 88  | 63  | 55  | 58  | 64  | 52  |
| 39 | 53 | 55  | 66  | 106 | 80  | 103 | 99  | 100 | 67  |
| 66 | 69 | 65  | 69  | 78  | 81  | 87  | 74  | 103 | 66  |
| 58 | 63 | 61  | 85  | 100 | 102 | 78  | 85  | 88  | 40  |
| 55 | 53 | 74  | 76  | 99  | 98  | 85  | 80  | 86  | 64  |
| 84 | 72 | 87  | 61  | 118 | 103 | 96  | 66  | 85  | 71  |
| 94 | 89 | 104 | 110 | 125 | 117 | 105 | 77  | 115 | 89  |

|     |     |     |     |     |     |     |     |     |     |
|-----|-----|-----|-----|-----|-----|-----|-----|-----|-----|
| 29  | 11  | 20  | 26  | 41  | 30  | 23  | 21  | 25  | 12  |
| 33  | 23  | 28  | 29  | 28  | 27  | 19  | 17  | 23  | 25  |
| 6   | 11  | 17  | 34  | 47  | 31  | 21  | 18  | 16  | 9   |
| 15  | 16  | 15  | 31  | 33  | 30  | 16  | 16  | 18  | 8   |
| 30  | 40  | 29  | 53  | 55  | 45  | 28  | 20  | 25  | 19  |
| 25  | 20  | 30  | 41  | 48  | 42  | 27  | 16  | 36  | 16  |
| 14  | 17  | 20  | 37  | 29  | 42  | 20  | 22  | 22  | 11  |
| 1   | 1   | 4   | 3   | 5   | 2   | 1   | 3   | 4   | 8   |
| 5   | 12  | 6   | 16  | 22  | 15  | 5   | 2   | 6   | 4   |
| 36  | 35  | 34  | 292 | 392 | 302 | 331 | 274 | 289 | 120 |
| 39  | 43  | 32  | 195 | 228 | 190 | 228 | 229 | 244 | 99  |
| 63  | 49  | 66  | 67  | 81  | 72  | 115 | 99  | 79  | 55  |
| 93  | 92  | 124 | 82  | 110 | 112 | 95  | 110 | 129 | 127 |
| 190 | 152 | 190 | 134 | 209 | 152 | 141 | 134 | 141 | 131 |
| 48  | 39  | 49  | 48  | 65  | 67  | 56  | 55  | 41  | 52  |
| 25  | 32  | 41  | 22  | 24  | 24  | 26  | 24  | 32  | 29  |
| 132 | 175 | 181 | 68  | 102 | 91  | 59  | 68  | 75  | 48  |
| 30  | 32  | 37  | 27  | 33  | 36  | 24  | 23  | 30  | 25  |
| 43  | 40  | 50  | 49  | 61  | 51  | 40  | 40  | 35  | 43  |
| 24  | 18  | 27  | 18  | 20  | 29  | 19  | 19  | 20  | 15  |
| 28  | 26  | 28  | 22  | 31  | 22  | 25  | 15  | 22  | 36  |
| 20  | 14  | 22  | 28  | 30  | 26  | 22  | 14  | 18  | 21  |
| 60  | 49  | 65  | 60  | 77  | 79  | 59  | 46  | 66  | 51  |
| 64  | 43  | 55  | 245 | 374 | 313 | 335 | 252 | 303 | 134 |
| 45  | 44  | 46  | 221 | 269 | 264 | 151 | 152 | 158 | 78  |
| 65  | 58  | 63  | 187 | 290 | 226 | 159 | 136 | 137 | 79  |
| 43  | 36  | 36  | 168 | 245 | 180 | 137 | 123 | 129 | 55  |
| 60  | 58  | 86  | 229 | 310 | 263 | 282 | 275 | 278 | 166 |
| 60  | 58  | 66  | 106 | 98  | 122 | 205 | 190 | 187 | 69  |
| 52  | 48  | 59  | 113 | 170 | 138 | 91  | 117 | 91  | 52  |
| 36  | 27  | 31  | 31  | 43  | 40  | 40  | 25  | 46  | 38  |
| 24  | 30  | 30  | 61  | 71  | 50  | 50  | 41  | 38  | 35  |
| 30  | 23  | 31  | 66  | 83  | 65  | 83  | 98  | 86  | 40  |
| 45  | 48  | 49  | 118 | 147 | 135 | 131 | 114 | 133 | 70  |
| 20  | 22  | 16  | 57  | 55  | 44  | 71  | 51  | 73  | 32  |
| 51  | 46  | 48  | 73  | 74  | 69  | 45  | 56  | 55  | 34  |
| 66  | 70  | 61  | 88  | 107 | 107 | 90  | 75  | 101 | 78  |
| 45  | 31  | 37  | 54  | 59  | 65  | 46  | 49  | 49  | 35  |
| 48  | 37  | 48  | 118 | 130 | 107 | 114 | 112 | 135 | 67  |
| 57  | 65  | 69  | 62  | 101 | 76  | 103 | 100 | 107 | 58  |
| 27  | 29  | 38  | 54  | 50  | 42  | 36  | 41  | 47  | 42  |

|     |     |     |     |     |     |     |     |     |     |
|-----|-----|-----|-----|-----|-----|-----|-----|-----|-----|
| 36  | 48  | 47  | 33  | 67  | 49  | 55  | 44  | 53  | 38  |
| 46  | 47  | 40  | 68  | 70  | 70  | 61  | 62  | 78  | 55  |
| 43  | 39  | 29  | 47  | 34  | 27  | 26  | 33  | 27  | 28  |
| 63  | 76  | 75  | 79  | 111 | 99  | 107 | 114 | 110 | 74  |
| 51  | 56  | 54  | 126 | 129 | 122 | 176 | 124 | 137 | 83  |
| 63  | 52  | 62  | 71  | 95  | 82  | 99  | 99  | 100 | 67  |
| 59  | 63  | 79  | 76  | 100 | 109 | 100 | 99  | 112 | 91  |
| 126 | 98  | 115 | 121 | 150 | 127 | 136 | 121 | 166 | 104 |
| 21  | 25  | 34  | 35  | 47  | 41  | 31  | 20  | 26  | 26  |
| 44  | 27  | 32  | 38  | 56  | 47  | 61  | 42  | 42  | 41  |
| 22  | 27  | 40  | 38  | 54  | 57  | 41  | 38  | 56  | 33  |
| 22  | 25  | 23  | 15  | 24  | 17  | 16  | 24  | 22  | 29  |
| 96  | 105 | 114 | 60  | 62  | 73  | 104 | 93  | 102 | 105 |
| 76  | 73  | 73  | 105 | 153 | 128 | 136 | 135 | 149 | 77  |
| 69  | 83  | 106 | 83  | 100 | 88  | 113 | 99  | 104 | 67  |
| 151 | 161 | 180 | 112 | 135 | 150 | 261 | 237 | 262 | 169 |
| 37  | 55  | 35  | 40  | 58  | 55  | 72  | 65  | 91  | 47  |
| 23  | 14  | 21  | 32  | 44  | 32  | 44  | 46  | 50  | 27  |
| 42  | 41  | 58  | 41  | 49  | 51  | 46  | 45  | 45  | 52  |
| 47  | 52  | 61  | 92  | 110 | 105 | 79  | 71  | 68  | 70  |
| 69  | 62  | 71  | 71  | 96  | 96  | 85  | 85  | 91  | 53  |
| 122 | 98  | 102 | 265 | 292 | 280 | 321 | 304 | 354 | 203 |
| 22  | 26  | 24  | 69  | 89  | 85  | 61  | 54  | 51  | 37  |
| 30  | 17  | 23  | 73  | 68  | 78  | 66  | 75  | 85  | 44  |
| 52  | 45  | 31  | 62  | 55  | 59  | 61  | 40  | 44  | 56  |
| 74  | 56  | 73  | 100 | 133 | 99  | 104 | 71  | 92  | 74  |
| 31  | 38  | 51  | 34  | 44  | 60  | 30  | 44  | 41  | 40  |
| 53  | 67  | 59  | 72  | 77  | 68  | 81  | 55  | 79  | 55  |
| 68  | 45  | 48  | 47  | 60  | 71  | 53  | 56  | 49  | 47  |
| 93  | 95  | 137 | 82  | 114 | 92  | 120 | 122 | 106 | 110 |
| 66  | 64  | 85  | 110 | 163 | 119 | 187 | 163 | 154 | 71  |
| 105 | 106 | 118 | 75  | 103 | 101 | 73  | 55  | 83  | 97  |
| 24  | 8   | 22  | 36  | 34  | 33  | 19  | 26  | 16  | 13  |
| 69  | 66  | 73  | 94  | 110 | 122 | 71  | 69  | 80  | 63  |
| 103 | 79  | 95  | 120 | 120 | 113 | 113 | 80  | 90  | 83  |
| 24  | 39  | 53  | 32  | 37  | 30  | 59  | 25  | 35  | 44  |
| 37  | 34  | 42  | 37  | 58  | 46  | 35  | 32  | 41  | 25  |
| 39  | 69  | 64  | 62  | 85  | 69  | 72  | 59  | 53  | 56  |
| 65  | 66  | 66  | 134 | 138 | 125 | 147 | 125 | 139 | 65  |
| 74  | 71  | 74  | 120 | 174 | 163 | 165 | 113 | 142 | 90  |
| 108 | 63  | 86  | 49  | 63  | 57  | 76  | 72  | 64  | 69  |

|    |    |    |     |     |     |     |     |     |     |
|----|----|----|-----|-----|-----|-----|-----|-----|-----|
| 39 | 51 | 50 | 93  | 121 | 99  | 116 | 98  | 123 | 78  |
| 32 | 35 | 48 | 49  | 67  | 70  | 41  | 36  | 52  | 36  |
| 44 | 42 | 41 | 52  | 58  | 49  | 30  | 34  | 37  | 40  |
| 29 | 30 | 32 | 35  | 46  | 53  | 48  | 33  | 33  | 32  |
| 40 | 42 | 56 | 116 | 177 | 145 | 154 | 134 | 129 | 82  |
| 47 | 51 | 61 | 58  | 69  | 71  | 77  | 75  | 62  | 64  |
| 58 | 56 | 62 | 94  | 126 | 119 | 77  | 66  | 89  | 48  |
| 42 | 38 | 49 | 135 | 173 | 140 | 163 | 174 | 168 | 93  |
| 55 | 45 | 49 | 190 | 300 | 288 | 290 | 265 | 312 | 122 |
| 21 | 16 | 28 | 39  | 45  | 31  | 33  | 42  | 44  | 34  |
| 23 | 23 | 21 | 12  | 17  | 13  | 18  | 24  | 16  | 24  |
| 39 | 36 | 29 | 35  | 55  | 51  | 50  | 38  | 48  | 25  |
| 40 | 24 | 25 | 45  | 72  | 62  | 72  | 83  | 67  | 42  |
| 50 | 51 | 53 | 138 | 161 | 174 | 159 | 145 | 165 | 87  |
| 79 | 73 | 86 | 46  | 52  | 48  | 60  | 61  | 53  | 61  |
| 28 | 30 | 24 | 29  | 35  | 15  | 30  | 28  | 24  | 16  |
| 19 | 22 | 25 | 22  | 24  | 20  | 21  | 26  | 20  | 18  |
| 38 | 38 | 50 | 44  | 61  | 48  | 32  | 54  | 58  | 40  |
| 39 | 36 | 37 | 41  | 58  | 62  | 60  | 42  | 52  | 41  |
| 26 | 54 | 44 | 68  | 74  | 58  | 41  | 61  | 58  | 34  |
| 68 | 65 | 77 | 66  | 92  | 70  | 69  | 87  | 67  | 57  |
| 42 | 54 | 55 | 95  | 98  | 99  | 55  | 57  | 65  | 22  |
| 66 | 74 | 60 | 92  | 108 | 117 | 83  | 55  | 78  | 51  |
| 16 | 20 | 12 | 11  | 17  | 28  | 15  | 21  | 16  | 17  |
| 12 | 34 | 22 | 22  | 10  | 25  | 26  | 20  | 21  | 25  |
| 28 | 27 | 20 | 28  | 30  | 35  | 28  | 21  | 29  | 20  |
| 69 | 65 | 74 | 89  | 107 | 87  | 95  | 76  | 90  | 76  |
| 33 | 45 | 34 | 46  | 56  | 51  | 47  | 38  | 52  | 25  |
| 28 | 37 | 32 | 92  | 95  | 89  | 86  | 73  | 86  | 39  |
| 3  | 3  | 3  | 0   | 0   | 0   | 0   | 1   | 0   | 0   |
| 55 | 66 | 43 | 16  | 24  | 28  | 36  | 21  | 34  | 32  |
| 19 | 22 | 20 | 25  | 40  | 42  | 23  | 28  | 34  | 24  |
| 5  | 2  | 4  | 4   | 3   | 5   | 3   | 1   | 2   | 3   |
| 27 | 25 | 36 | 26  | 31  | 28  | 45  | 34  | 33  | 32  |
| 36 | 40 | 39 | 41  | 53  | 53  | 80  | 59  | 54  | 47  |
| 77 | 67 | 91 | 67  | 82  | 80  | 118 | 117 | 100 | 97  |
| 56 | 58 | 49 | 67  | 83  | 78  | 81  | 77  | 98  | 65  |
| 25 | 21 | 35 | 27  | 52  | 19  | 26  | 20  | 27  | 16  |
| 73 | 54 | 69 | 106 | 128 | 110 | 63  | 67  | 87  | 73  |
| 34 | 41 | 49 | 126 | 147 | 151 | 85  | 76  | 63  | 40  |
| 50 | 34 | 44 | 53  | 45  | 43  | 47  | 43  | 47  | 34  |

|     |     |     |     |     |     |     |     |     |     |
|-----|-----|-----|-----|-----|-----|-----|-----|-----|-----|
| 11  | 12  | 16  | 11  | 27  | 18  | 6   | 8   | 7   | 5   |
| 13  | 23  | 28  | 16  | 10  | 13  | 14  | 19  | 11  | 21  |
| 32  | 32  | 25  | 25  | 36  | 32  | 34  | 15  | 13  | 22  |
| 52  | 63  | 66  | 89  | 99  | 71  | 66  | 66  | 72  | 44  |
| 36  | 29  | 29  | 64  | 74  | 74  | 51  | 48  | 54  | 37  |
| 26  | 23  | 21  | 22  | 31  | 32  | 14  | 11  | 15  | 12  |
| 32  | 27  | 32  | 33  | 35  | 37  | 28  | 17  | 27  | 30  |
| 33  | 43  | 55  | 49  | 46  | 40  | 53  | 43  | 39  | 51  |
| 42  | 33  | 41  | 56  | 66  | 52  | 71  | 50  | 48  | 33  |
| 52  | 54  | 56  | 79  | 71  | 57  | 62  | 44  | 56  | 49  |
| 71  | 68  | 85  | 47  | 60  | 55  | 62  | 66  | 63  | 75  |
| 102 | 114 | 119 | 54  | 88  | 71  | 98  | 88  | 96  | 102 |
| 173 | 155 | 200 | 121 | 158 | 119 | 217 | 197 | 196 | 178 |
| 351 | 345 | 428 | 188 | 237 | 216 | 407 | 465 | 469 | 390 |
| 109 | 114 | 117 | 64  | 98  | 76  | 85  | 77  | 82  | 112 |
| 74  | 80  | 99  | 38  | 41  | 30  | 62  | 56  | 57  | 75  |
| 93  | 74  | 90  | 120 | 94  | 87  | 84  | 105 | 103 | 85  |
| 43  | 40  | 45  | 52  | 54  | 34  | 48  | 32  | 43  | 35  |
| 134 | 152 | 184 | 162 | 204 | 148 | 177 | 187 | 178 | 184 |
| 100 | 93  | 100 | 131 | 172 | 151 | 193 | 168 | 202 | 130 |
| 174 | 167 | 190 | 101 | 107 | 90  | 170 | 164 | 210 | 173 |
| 48  | 39  | 42  | 78  | 110 | 76  | 84  | 99  | 97  | 67  |
| 41  | 44  | 37  | 70  | 75  | 76  | 80  | 70  | 60  | 36  |
| 25  | 38  | 58  | 56  | 70  | 52  | 61  | 50  | 66  | 53  |
| 38  | 52  | 50  | 39  | 56  | 64  | 31  | 43  | 59  | 42  |
| 81  | 65  | 89  | 122 | 134 | 114 | 133 | 147 | 130 | 87  |
| 51  | 72  | 71  | 105 | 153 | 134 | 202 | 160 | 210 | 98  |
| 60  | 58  | 48  | 71  | 87  | 99  | 85  | 95  | 80  | 63  |
| 74  | 67  | 67  | 78  | 101 | 89  | 87  | 87  | 97  | 78  |
| 53  | 57  | 58  | 49  | 55  | 64  | 49  | 57  | 52  | 35  |
| 54  | 60  | 88  | 99  | 133 | 111 | 150 | 130 | 136 | 93  |
| 41  | 55  | 46  | 58  | 65  | 70  | 48  | 39  | 61  | 53  |
| 62  | 60  | 64  | 76  | 87  | 87  | 76  | 67  | 66  | 47  |
| 133 | 137 | 144 | 139 | 216 | 162 | 145 | 156 | 154 | 159 |
| 192 | 171 | 197 | 123 | 138 | 156 | 126 | 130 | 149 | 170 |
| 22  | 22  | 25  | 46  | 53  | 43  | 34  | 22  | 25  | 33  |
| 11  | 8   | 14  | 33  | 30  | 33  | 16  | 26  | 27  | 11  |
| 45  | 48  | 44  | 71  | 112 | 94  | 66  | 61  | 88  | 48  |
| 77  | 69  | 67  | 278 | 426 | 328 | 147 | 153 | 161 | 106 |
| 24  | 24  | 29  | 63  | 69  | 80  | 68  | 64  | 58  | 28  |
| 51  | 60  | 60  | 96  | 97  | 109 | 93  | 97  | 109 | 74  |

|     |     |     |     |     |     |     |     |     |     |
|-----|-----|-----|-----|-----|-----|-----|-----|-----|-----|
| 58  | 60  | 51  | 88  | 115 | 120 | 99  | 119 | 115 | 77  |
| 99  | 97  | 130 | 120 | 131 | 129 | 117 | 144 | 170 | 103 |
| 36  | 54  | 36  | 70  | 104 | 102 | 87  | 94  | 85  | 55  |
| 20  | 23  | 28  | 78  | 108 | 74  | 50  | 44  | 55  | 31  |
| 62  | 61  | 44  | 106 | 156 | 127 | 80  | 73  | 57  | 53  |
| 71  | 33  | 61  | 135 | 169 | 169 | 158 | 126 | 136 | 93  |
| 77  | 63  | 75  | 191 | 225 | 188 | 176 | 115 | 156 | 75  |
| 55  | 56  | 63  | 39  | 44  | 55  | 37  | 43  | 37  | 45  |
| 44  | 40  | 61  | 82  | 111 | 107 | 80  | 64  | 81  | 52  |
| 40  | 46  | 44  | 42  | 56  | 78  | 85  | 51  | 71  | 41  |
| 61  | 72  | 75  | 57  | 68  | 69  | 72  | 64  | 72  | 72  |
| 27  | 28  | 30  | 49  | 62  | 71  | 61  | 61  | 56  | 43  |
| 19  | 29  | 28  | 47  | 67  | 61  | 49  | 48  | 39  | 28  |
| 38  | 42  | 26  | 48  | 47  | 33  | 36  | 26  | 33  | 30  |
| 40  | 61  | 60  | 67  | 97  | 100 | 86  | 71  | 108 | 56  |
| 37  | 49  | 41  | 34  | 30  | 30  | 28  | 31  | 35  | 52  |
| 90  | 74  | 99  | 154 | 175 | 188 | 213 | 213 | 210 | 143 |
| 28  | 25  | 27  | 73  | 112 | 89  | 90  | 65  | 80  | 34  |
| 91  | 101 | 84  | 78  | 127 | 89  | 93  | 87  | 94  | 59  |
| 43  | 42  | 64  | 64  | 78  | 87  | 45  | 55  | 64  | 46  |
| 77  | 80  | 90  | 110 | 125 | 125 | 120 | 91  | 136 | 72  |
| 56  | 71  | 63  | 115 | 120 | 116 | 144 | 135 | 164 | 73  |
| 36  | 34  | 33  | 52  | 56  | 45  | 47  | 33  | 52  | 46  |
| 43  | 45  | 51  | 38  | 44  | 41  | 28  | 31  | 30  | 44  |
| 101 | 115 | 123 | 72  | 100 | 112 | 109 | 110 | 123 | 91  |
| 45  | 55  | 56  | 78  | 90  | 71  | 60  | 49  | 63  | 48  |
| 50  | 37  | 46  | 70  | 96  | 68  | 58  | 67  | 68  | 51  |
| 43  | 34  | 56  | 70  | 92  | 78  | 62  | 54  | 56  | 47  |
| 47  | 47  | 60  | 164 | 208 | 171 | 254 | 227 | 229 | 113 |
| 64  | 42  | 63  | 111 | 142 | 114 | 153 | 139 | 139 | 83  |
| 40  | 36  | 34  | 72  | 99  | 70  | 89  | 75  | 69  | 48  |
| 40  | 43  | 52  | 72  | 74  | 78  | 76  | 84  | 76  | 46  |
| 48  | 29  | 57  | 65  | 77  | 53  | 51  | 40  | 40  | 25  |
| 38  | 39  | 32  | 24  | 41  | 49  | 37  | 26  | 37  | 32  |
| 29  | 30  | 36  | 76  | 75  | 67  | 61  | 49  | 54  | 52  |
| 34  | 35  | 36  | 33  | 32  | 31  | 27  | 25  | 34  | 30  |
| 36  | 40  | 46  | 63  | 78  | 87  | 58  | 53  | 62  | 49  |
| 34  | 45  | 47  | 64  | 59  | 69  | 70  | 65  | 72  | 55  |
| 32  | 37  | 40  | 70  | 77  | 83  | 65  | 59  | 64  | 36  |
| 37  | 50  | 40  | 60  | 56  | 63  | 51  | 52  | 50  | 41  |
| 21  | 35  | 42  | 46  | 53  | 51  | 36  | 37  | 48  | 33  |

|     |     |     |     |     |     |     |     |     |     |
|-----|-----|-----|-----|-----|-----|-----|-----|-----|-----|
| 83  | 87  | 94  | 84  | 95  | 97  | 91  | 84  | 96  | 89  |
| 50  | 61  | 50  | 53  | 54  | 49  | 82  | 84  | 87  | 44  |
| 53  | 39  | 54  | 69  | 89  | 74  | 89  | 68  | 79  | 41  |
| 41  | 31  | 37  | 18  | 32  | 24  | 31  | 25  | 35  | 22  |
| 85  | 110 | 96  | 83  | 108 | 90  | 106 | 88  | 95  | 94  |
| 38  | 33  | 46  | 113 | 142 | 103 | 123 | 98  | 105 | 47  |
| 36  | 52  | 56  | 105 | 156 | 131 | 96  | 92  | 101 | 47  |
| 18  | 18  | 18  | 45  | 52  | 57  | 58  | 42  | 49  | 26  |
| 40  | 35  | 30  | 57  | 59  | 43  | 27  | 34  | 35  | 29  |
| 57  | 53  | 45  | 109 | 174 | 144 | 71  | 81  | 84  | 56  |
| 40  | 32  | 33  | 65  | 92  | 76  | 72  | 54  | 72  | 47  |
| 46  | 57  | 52  | 97  | 109 | 79  | 86  | 69  | 64  | 42  |
| 59  | 68  | 81  | 128 | 141 | 117 | 100 | 64  | 115 | 51  |
| 28  | 32  | 39  | 34  | 50  | 46  | 45  | 42  | 33  | 26  |
| 109 | 104 | 127 | 73  | 86  | 88  | 86  | 97  | 109 | 100 |
| 39  | 43  | 39  | 92  | 113 | 90  | 83  | 71  | 72  | 46  |
| 22  | 28  | 32  | 40  | 55  | 51  | 55  | 37  | 33  | 27  |
| 118 | 137 | 138 | 112 | 132 | 124 | 127 | 129 | 136 | 145 |
| 21  | 11  | 24  | 18  | 19  | 16  | 9   | 9   | 13  | 16  |
| 33  | 39  | 28  | 24  | 25  | 25  | 30  | 26  | 24  | 24  |
| 26  | 38  | 40  | 43  | 43  | 41  | 61  | 62  | 36  | 29  |
| 48  | 52  | 57  | 45  | 54  | 53  | 67  | 59  | 70  | 46  |
| 57  | 58  | 65  | 73  | 75  | 87  | 79  | 80  | 81  | 45  |
| 52  | 68  | 56  | 86  | 92  | 99  | 80  | 60  | 72  | 56  |
| 25  | 21  | 28  | 39  | 52  | 37  | 45  | 48  | 58  | 32  |
| 46  | 59  | 60  | 87  | 106 | 95  | 84  | 74  | 80  | 44  |
| 13  | 13  | 16  | 21  | 26  | 24  | 24  | 21  | 26  | 15  |
| 82  | 101 | 82  | 415 | 604 | 513 | 600 | 469 | 513 | 211 |
| 85  | 75  | 74  | 111 | 118 | 133 | 121 | 109 | 143 | 95  |
| 66  | 62  | 74  | 71  | 73  | 72  | 66  | 61  | 70  | 55  |
| 79  | 73  | 86  | 183 | 217 | 199 | 256 | 228 | 222 | 133 |
| 55  | 51  | 55  | 74  | 105 | 98  | 96  | 94  | 80  | 70  |
| 56  | 49  | 67  | 87  | 114 | 119 | 161 | 141 | 134 | 81  |
| 53  | 43  | 49  | 155 | 172 | 164 | 217 | 194 | 213 | 106 |
| 43  | 46  | 50  | 41  | 48  | 52  | 49  | 40  | 52  | 56  |
| 29  | 27  | 31  | 54  | 60  | 51  | 56  | 35  | 53  | 36  |
| 49  | 44  | 57  | 106 | 113 | 108 | 93  | 82  | 90  | 66  |
| 29  | 23  | 30  | 56  | 47  | 55  | 64  | 55  | 58  | 30  |
| 64  | 51  | 65  | 79  | 110 | 97  | 90  | 86  | 95  | 80  |
| 51  | 40  | 38  | 48  | 58  | 49  | 68  | 59  | 69  | 53  |
| 32  | 38  | 36  | 18  | 16  | 14  | 25  | 37  | 32  | 42  |

|     |     |     |     |     |     |     |     |     |     |
|-----|-----|-----|-----|-----|-----|-----|-----|-----|-----|
| 42  | 34  | 48  | 95  | 131 | 128 | 156 | 158 | 146 | 71  |
| 55  | 48  | 49  | 45  | 56  | 45  | 54  | 57  | 63  | 55  |
| 34  | 38  | 40  | 66  | 79  | 68  | 51  | 55  | 50  | 53  |
| 17  | 16  | 20  | 8   | 23  | 12  | 23  | 20  | 18  | 18  |
| 130 | 123 | 138 | 173 | 245 | 192 | 305 | 257 | 275 | 178 |
| 11  | 12  | 14  | 19  | 34  | 23  | 25  | 28  | 20  | 15  |
| 43  | 29  | 36  | 44  | 42  | 35  | 47  | 37  | 28  | 22  |
| 42  | 50  | 55  | 40  | 60  | 49  | 62  | 35  | 46  | 50  |
| 27  | 30  | 40  | 78  | 109 | 96  | 81  | 67  | 85  | 43  |
| 37  | 24  | 27  | 34  | 41  | 30  | 32  | 34  | 20  | 22  |
| 6   | 15  | 8   | 7   | 14  | 5   | 13  | 12  | 9   | 4   |
| 40  | 41  | 32  | 38  | 55  | 53  | 40  | 37  | 56  | 43  |
| 24  | 27  | 34  | 33  | 56  | 44  | 31  | 36  | 33  | 29  |
| 32  | 32  | 30  | 21  | 18  | 22  | 26  | 16  | 27  | 34  |
| 26  | 27  | 21  | 32  | 42  | 42  | 21  | 19  | 21  | 22  |
| 54  | 45  | 63  | 42  | 63  | 42  | 52  | 40  | 36  | 39  |
| 57  | 41  | 60  | 85  | 103 | 106 | 78  | 57  | 93  | 55  |
| 49  | 45  | 34  | 60  | 71  | 63  | 72  | 53  | 59  | 39  |
| 26  | 29  | 45  | 41  | 49  | 57  | 51  | 47  | 53  | 33  |
| 47  | 49  | 53  | 66  | 61  | 52  | 64  | 73  | 60  | 42  |
| 41  | 30  | 51  | 46  | 59  | 52  | 39  | 47  | 39  | 51  |
| 37  | 49  | 37  | 73  | 86  | 76  | 64  | 69  | 76  | 44  |
| 40  | 55  | 59  | 19  | 44  | 36  | 39  | 18  | 41  | 39  |
| 43  | 54  | 44  | 85  | 131 | 127 | 111 | 84  | 124 | 61  |
| 95  | 118 | 112 | 95  | 114 | 98  | 95  | 85  | 105 | 83  |
| 50  | 71  | 47  | 83  | 100 | 73  | 83  | 84  | 94  | 75  |
| 69  | 51  | 71  | 76  | 81  | 68  | 110 | 116 | 100 | 76  |
| 93  | 81  | 80  | 49  | 77  | 71  | 75  | 58  | 54  | 86  |
| 51  | 39  | 49  | 36  | 49  | 29  | 49  | 29  | 29  | 38  |
| 107 | 122 | 131 | 121 | 147 | 113 | 152 | 134 | 150 | 118 |
| 105 | 90  | 107 | 98  | 94  | 92  | 97  | 92  | 108 | 69  |
| 53  | 55  | 34  | 109 | 178 | 141 | 168 | 143 | 177 | 87  |
| 53  | 46  | 42  | 140 | 143 | 144 | 178 | 160 | 173 | 89  |
| 34  | 47  | 40  | 12  | 27  | 27  | 22  | 22  | 33  | 30  |
| 46  | 41  | 38  | 51  | 63  | 47  | 48  | 50  | 50  | 33  |
| 23  | 18  | 27  | 23  | 24  | 26  | 29  | 25  | 26  | 22  |
| 21  | 13  | 19  | 18  | 19  | 24  | 20  | 15  | 23  | 19  |
| 28  | 30  | 27  | 16  | 26  | 23  | 19  | 19  | 20  | 26  |
| 23  | 28  | 43  | 34  | 43  | 39  | 43  | 42  | 36  | 28  |
| 36  | 30  | 34  | 39  | 29  | 47  | 36  | 27  | 27  | 20  |
| 22  | 24  | 22  | 12  | 13  | 12  | 12  | 14  | 12  | 16  |



|     |     |     |     |     |     |     |     |     |     |
|-----|-----|-----|-----|-----|-----|-----|-----|-----|-----|
| 18  | 29  | 25  | 12  | 19  | 19  | 17  | 17  | 11  | 26  |
| 36  | 41  | 42  | 37  | 59  | 53  | 57  | 61  | 54  | 55  |
| 37  | 45  | 46  | 24  | 27  | 25  | 26  | 45  | 33  | 32  |
| 19  | 18  | 33  | 22  | 18  | 28  | 16  | 16  | 19  | 20  |
| 34  | 35  | 43  | 41  | 49  | 30  | 33  | 44  | 40  | 24  |
| 22  | 22  | 32  | 27  | 23  | 27  | 24  | 20  | 30  | 19  |
| 44  | 51  | 46  | 59  | 48  | 44  | 52  | 40  | 46  | 40  |
| 28  | 36  | 34  | 17  | 17  | 19  | 14  | 13  | 12  | 19  |
| 66  | 53  | 58  | 49  | 58  | 47  | 42  | 35  | 50  | 44  |
| 29  | 36  | 28  | 39  | 35  | 26  | 46  | 33  | 36  | 45  |
| 31  | 41  | 34  | 50  | 60  | 52  | 43  | 44  | 35  | 33  |
| 37  | 31  | 43  | 41  | 50  | 62  | 28  | 36  | 48  | 35  |
| 34  | 44  | 45  | 24  | 31  | 32  | 26  | 21  | 25  | 41  |
| 48  | 57  | 90  | 40  | 64  | 45  | 56  | 51  | 66  | 39  |
| 73  | 73  | 75  | 126 | 129 | 125 | 85  | 92  | 118 | 94  |
| 106 | 111 | 140 | 103 | 175 | 149 | 142 | 138 | 155 | 116 |
| 46  | 53  | 63  | 85  | 86  | 81  | 121 | 126 | 122 | 89  |
| 74  | 60  | 59  | 112 | 102 | 115 | 102 | 99  | 114 | 74  |
| 79  | 66  | 94  | 69  | 97  | 87  | 92  | 106 | 103 | 70  |
| 41  | 54  | 62  | 26  | 51  | 42  | 38  | 34  | 43  | 46  |
| 26  | 22  | 32  | 18  | 30  | 20  | 33  | 21  | 19  | 28  |
| 50  | 49  | 37  | 51  | 45  | 51  | 41  | 55  | 54  | 37  |
| 56  | 53  | 43  | 110 | 121 | 133 | 119 | 133 | 134 | 73  |
| 58  | 65  | 62  | 36  | 38  | 35  | 37  | 22  | 42  | 41  |
| 36  | 44  | 38  | 20  | 37  | 19  | 37  | 26  | 21  | 35  |
| 41  | 49  | 44  | 59  | 62  | 52  | 56  | 68  | 39  | 53  |
| 19  | 26  | 27  | 17  | 35  | 29  | 19  | 17  | 23  | 27  |
| 16  | 17  | 14  | 41  | 41  | 33  | 32  | 32  | 30  | 29  |
| 14  | 9   | 12  | 14  | 19  | 15  | 10  | 7   | 10  | 9   |
| 19  | 18  | 21  | 23  | 45  | 30  | 22  | 21  | 20  | 21  |
| 84  | 76  | 97  | 90  | 124 | 120 | 109 | 85  | 117 | 84  |
| 100 | 84  | 120 | 121 | 137 | 135 | 161 | 148 | 171 | 143 |
| 51  | 39  | 61  | 130 | 118 | 116 | 130 | 146 | 139 | 93  |
| 67  | 77  | 81  | 144 | 180 | 155 | 219 | 194 | 202 | 104 |
| 40  | 33  | 39  | 84  | 101 | 100 | 69  | 62  | 72  | 37  |
| 59  | 66  | 65  | 110 | 154 | 130 | 108 | 123 | 110 | 83  |
| 42  | 45  | 56  | 61  | 81  | 61  | 55  | 59  | 54  | 41  |
| 54  | 59  | 68  | 73  | 94  | 98  | 72  | 62  | 74  | 46  |
| 65  | 47  | 50  | 70  | 71  | 85  | 83  | 87  | 81  | 61  |
| 42  | 31  | 43  | 50  | 62  | 45  | 50  | 42  | 47  | 36  |
| 83  | 68  | 92  | 184 | 260 | 238 | 206 | 163 | 209 | 134 |

|     |     |     |     |     |     |     |     |     |     |
|-----|-----|-----|-----|-----|-----|-----|-----|-----|-----|
| 42  | 39  | 43  | 48  | 85  | 68  | 84  | 81  | 79  | 66  |
| 32  | 43  | 38  | 35  | 31  | 32  | 48  | 46  | 46  | 39  |
| 48  | 38  | 44  | 220 | 318 | 264 | 282 | 210 | 272 | 114 |
| 63  | 73  | 93  | 90  | 117 | 97  | 106 | 90  | 95  | 49  |
| 43  | 39  | 47  | 89  | 111 | 114 | 127 | 93  | 99  | 72  |
| 71  | 60  | 59  | 61  | 86  | 79  | 94  | 76  | 81  | 67  |
| 104 | 107 | 126 | 106 | 112 | 104 | 117 | 86  | 105 | 69  |
| 36  | 44  | 36  | 103 | 121 | 84  | 89  | 59  | 61  | 49  |
| 38  | 38  | 42  | 242 | 334 | 287 | 239 | 231 | 250 | 119 |
| 47  | 46  | 47  | 102 | 138 | 141 | 141 | 116 | 115 | 56  |
| 39  | 48  | 44  | 81  | 104 | 86  | 65  | 77  | 78  | 56  |
| 60  | 50  | 62  | 250 | 296 | 259 | 230 | 182 | 224 | 104 |
| 29  | 37  | 43  | 76  | 100 | 97  | 73  | 90  | 77  | 43  |
| 56  | 72  | 58  | 231 | 332 | 277 | 313 | 251 | 275 | 116 |
| 47  | 48  | 73  | 94  | 128 | 94  | 79  | 61  | 74  | 58  |
| 43  | 47  | 49  | 91  | 137 | 111 | 95  | 85  | 74  | 49  |
| 30  | 35  | 30  | 58  | 58  | 68  | 60  | 44  | 57  | 43  |
| 67  | 55  | 83  | 132 | 136 | 105 | 97  | 95  | 115 | 62  |
| 33  | 29  | 39  | 53  | 66  | 54  | 57  | 38  | 40  | 31  |
| 22  | 34  | 35  | 41  | 52  | 53  | 47  | 63  | 49  | 30  |
| 60  | 51  | 71  | 206 | 240 | 228 | 173 | 156 | 168 | 108 |
| 33  | 28  | 37  | 38  | 52  | 36  | 40  | 28  | 36  | 35  |
| 38  | 32  | 34  | 23  | 33  | 24  | 36  | 26  | 25  | 21  |
| 32  | 34  | 30  | 58  | 49  | 45  | 54  | 51  | 47  | 32  |
| 31  | 38  | 37  | 48  | 56  | 48  | 52  | 42  | 70  | 38  |
| 59  | 63  | 54  | 102 | 154 | 115 | 93  | 88  | 101 | 73  |
| 35  | 35  | 48  | 65  | 81  | 87  | 69  | 60  | 57  | 39  |
| 26  | 32  | 43  | 16  | 25  | 21  | 26  | 25  | 29  | 30  |
| 71  | 86  | 75  | 135 | 216 | 137 | 178 | 165 | 153 | 97  |
| 28  | 36  | 40  | 47  | 48  | 59  | 39  | 33  | 36  | 43  |
| 37  | 40  | 57  | 161 | 181 | 175 | 157 | 132 | 150 | 65  |
| 49  | 57  | 62  | 130 | 215 | 168 | 171 | 191 | 179 | 86  |
| 55  | 47  | 50  | 133 | 156 | 133 | 122 | 117 | 152 | 50  |
| 46  | 36  | 44  | 55  | 74  | 54  | 58  | 63  | 61  | 54  |
| 68  | 91  | 71  | 348 | 440 | 347 | 425 | 359 | 389 | 161 |
| 25  | 23  | 32  | 46  | 61  | 57  | 56  | 41  | 50  | 28  |
| 35  | 61  | 67  | 174 | 230 | 199 | 128 | 103 | 136 | 76  |
| 62  | 56  | 66  | 108 | 138 | 127 | 85  | 54  | 80  | 42  |
| 56  | 58  | 56  | 37  | 52  | 48  | 46  | 44  | 50  | 48  |
| 60  | 65  | 68  | 108 | 151 | 112 | 111 | 132 | 134 | 81  |
| 30  | 35  | 30  | 63  | 62  | 69  | 67  | 58  | 61  | 34  |

|    |    |     |     |     |     |     |     |     |     |
|----|----|-----|-----|-----|-----|-----|-----|-----|-----|
| 75 | 65 | 68  | 102 | 122 | 107 | 112 | 114 | 126 | 84  |
| 46 | 56 | 63  | 73  | 100 | 100 | 86  | 87  | 106 | 75  |
| 33 | 38 | 55  | 84  | 97  | 83  | 86  | 62  | 74  | 47  |
| 71 | 53 | 58  | 100 | 128 | 115 | 112 | 106 | 120 | 63  |
| 22 | 15 | 19  | 30  | 39  | 37  | 24  | 29  | 29  | 25  |
| 54 | 46 | 40  | 64  | 80  | 72  | 81  | 64  | 75  | 34  |
| 41 | 41 | 54  | 68  | 97  | 102 | 89  | 70  | 74  | 54  |
| 68 | 70 | 59  | 79  | 92  | 82  | 141 | 107 | 147 | 66  |
| 36 | 40 | 49  | 77  | 94  | 84  | 80  | 105 | 97  | 64  |
| 41 | 59 | 51  | 182 | 223 | 162 | 165 | 166 | 146 | 80  |
| 94 | 99 | 108 | 129 | 200 | 162 | 177 | 160 | 157 | 140 |
| 16 | 24 | 30  | 47  | 52  | 42  | 26  | 42  | 31  | 16  |
| 46 | 41 | 54  | 45  | 62  | 48  | 41  | 40  | 48  | 38  |
| 33 | 38 | 35  | 85  | 106 | 100 | 67  | 80  | 80  | 48  |
| 44 | 36 | 43  | 68  | 77  | 52  | 70  | 59  | 43  | 34  |
| 41 | 40 | 37  | 48  | 47  | 72  | 32  | 37  | 51  | 46  |
| 37 | 50 | 30  | 42  | 64  | 58  | 51  | 42  | 40  | 51  |
| 33 | 36 | 48  | 55  | 69  | 48  | 81  | 67  | 82  | 48  |
| 59 | 48 | 76  | 141 | 168 | 167 | 157 | 123 | 168 | 100 |
| 28 | 23 | 16  | 34  | 45  | 50  | 24  | 29  | 37  | 22  |
| 58 | 64 | 62  | 149 | 205 | 212 | 151 | 124 | 138 | 76  |
| 69 | 49 | 74  | 286 | 382 | 332 | 337 | 283 | 314 | 143 |
| 42 | 42 | 44  | 143 | 191 | 204 | 160 | 133 | 172 | 98  |
| 40 | 63 | 63  | 112 | 171 | 144 | 143 | 129 | 119 | 75  |
| 33 | 32 | 34  | 111 | 169 | 139 | 109 | 88  | 119 | 53  |
| 27 | 36 | 25  | 86  | 109 | 116 | 93  | 77  | 86  | 45  |
| 34 | 41 | 51  | 240 | 328 | 260 | 236 | 213 | 230 | 101 |
| 67 | 72 | 73  | 228 | 350 | 297 | 300 | 247 | 284 | 127 |
| 48 | 54 | 66  | 414 | 592 | 527 | 502 | 457 | 558 | 246 |
| 56 | 47 | 58  | 174 | 206 | 191 | 147 | 123 | 135 | 65  |
| 24 | 28 | 24  | 180 | 214 | 163 | 134 | 104 | 118 | 44  |
| 34 | 27 | 32  | 41  | 51  | 40  | 42  | 41  | 42  | 31  |
| 47 | 46 | 56  | 106 | 93  | 82  | 127 | 141 | 139 | 77  |
| 62 | 47 | 52  | 30  | 33  | 43  | 27  | 46  | 39  | 25  |
| 90 | 77 | 82  | 103 | 107 | 115 | 135 | 136 | 129 | 84  |
| 23 | 26 | 27  | 41  | 47  | 51  | 33  | 22  | 28  | 17  |
| 24 | 30 | 34  | 29  | 27  | 21  | 16  | 20  | 17  | 23  |
| 5  | 11 | 9   | 7   | 8   | 13  | 13  | 5   | 5   | 9   |
| 19 | 24 | 18  | 48  | 50  | 47  | 35  | 29  | 37  | 24  |
| 32 | 32 | 36  | 31  | 51  | 51  | 44  | 32  | 44  | 21  |
| 39 | 43 | 47  | 42  | 49  | 46  | 33  | 30  | 35  | 37  |

|    |    |    |     |     |     |     |     |     |     |
|----|----|----|-----|-----|-----|-----|-----|-----|-----|
| 29 | 27 | 31 | 52  | 47  | 52  | 30  | 21  | 29  | 25  |
| 38 | 49 | 30 | 33  | 38  | 38  | 30  | 11  | 27  | 34  |
| 29 | 23 | 38 | 42  | 55  | 42  | 36  | 39  | 57  | 30  |
| 31 | 36 | 37 | 26  | 43  | 39  | 41  | 33  | 27  | 28  |
| 46 | 28 | 40 | 54  | 44  | 47  | 51  | 33  | 50  | 40  |
| 39 | 38 | 45 | 50  | 61  | 70  | 21  | 34  | 62  | 47  |
| 40 | 28 | 37 | 82  | 101 | 87  | 62  | 64  | 64  | 57  |
| 56 | 66 | 57 | 152 | 210 | 167 | 163 | 164 | 176 | 95  |
| 33 | 30 | 22 | 34  | 36  | 35  | 36  | 32  | 32  | 22  |
| 8  | 17 | 15 | 21  | 29  | 15  | 16  | 10  | 17  | 9   |
| 9  | 14 | 14 | 17  | 20  | 21  | 22  | 14  | 21  | 5   |
| 38 | 39 | 36 | 96  | 105 | 65  | 63  | 62  | 88  | 35  |
| 44 | 27 | 46 | 73  | 81  | 60  | 64  | 58  | 58  | 39  |
| 41 | 44 | 48 | 40  | 34  | 40  | 33  | 34  | 37  | 29  |
| 66 | 51 | 63 | 73  | 84  | 72  | 76  | 53  | 75  | 65  |
| 51 | 46 | 50 | 40  | 48  | 51  | 49  | 60  | 55  | 52  |
| 35 | 49 | 58 | 64  | 77  | 80  | 93  | 76  | 98  | 53  |
| 68 | 54 | 50 | 61  | 58  | 57  | 62  | 52  | 57  | 59  |
| 36 | 37 | 43 | 73  | 89  | 85  | 89  | 69  | 81  | 44  |
| 45 | 48 | 47 | 42  | 62  | 62  | 68  | 61  | 63  | 62  |
| 96 | 95 | 98 | 93  | 117 | 105 | 143 | 107 | 130 | 105 |
| 68 | 71 | 66 | 65  | 102 | 78  | 77  | 84  | 89  | 55  |
| 18 | 19 | 30 | 32  | 42  | 27  | 26  | 32  | 41  | 24  |
| 30 | 22 | 25 | 34  | 46  | 38  | 21  | 19  | 25  | 25  |
| 51 | 51 | 63 | 74  | 74  | 73  | 80  | 78  | 82  | 56  |
| 20 | 22 | 17 | 26  | 24  | 26  | 19  | 12  | 29  | 16  |
| 45 | 51 | 48 | 36  | 41  | 43  | 62  | 67  | 80  | 32  |
| 82 | 58 | 75 | 75  | 89  | 80  | 83  | 76  | 96  | 74  |
| 23 | 29 | 27 | 48  | 71  | 59  | 28  | 20  | 30  | 38  |
| 49 | 34 | 42 | 62  | 86  | 84  | 63  | 70  | 73  | 37  |
| 51 | 57 | 72 | 99  | 117 | 118 | 102 | 87  | 111 | 59  |
| 45 | 54 | 51 | 88  | 107 | 87  | 92  | 78  | 78  | 53  |
| 32 | 39 | 33 | 48  | 60  | 48  | 50  | 35  | 39  | 38  |
| 75 | 75 | 64 | 101 | 105 | 97  | 94  | 78  | 90  | 50  |
| 27 | 26 | 26 | 63  | 56  | 49  | 58  | 66  | 75  | 41  |
| 24 | 26 | 26 | 33  | 34  | 40  | 22  | 17  | 28  | 23  |
| 33 | 40 | 38 | 76  | 101 | 82  | 80  | 75  | 68  | 53  |
| 50 | 38 | 55 | 53  | 57  | 62  | 61  | 59  | 62  | 45  |
| 32 | 34 | 53 | 69  | 75  | 75  | 58  | 81  | 63  | 43  |
| 60 | 44 | 78 | 154 | 191 | 166 | 182 | 160 | 185 | 90  |
| 33 | 34 | 34 | 69  | 106 | 108 | 62  | 45  | 48  | 36  |

|     |     |     |     |     |     |     |     |     |     |
|-----|-----|-----|-----|-----|-----|-----|-----|-----|-----|
| 49  | 40  | 45  | 117 | 134 | 129 | 70  | 60  | 79  | 44  |
| 114 | 99  | 126 | 125 | 147 | 131 | 160 | 149 | 162 | 127 |
| 37  | 38  | 64  | 152 | 180 | 138 | 146 | 113 | 142 | 83  |
| 57  | 59  | 57  | 70  | 103 | 110 | 104 | 82  | 99  | 74  |
| 22  | 24  | 22  | 152 | 214 | 200 | 241 | 210 | 214 | 107 |
| 64  | 64  | 59  | 112 | 156 | 123 | 112 | 103 | 115 | 64  |
| 17  | 19  | 14  | 19  | 25  | 22  | 31  | 17  | 18  | 14  |
| 36  | 38  | 36  | 84  | 94  | 95  | 124 | 125 | 158 | 53  |
| 53  | 43  | 51  | 123 | 167 | 127 | 114 | 107 | 114 | 74  |
| 40  | 39  | 44  | 91  | 140 | 130 | 103 | 87  | 97  | 56  |
| 48  | 35  | 36  | 23  | 23  | 29  | 25  | 22  | 30  | 34  |
| 37  | 47  | 48  | 43  | 54  | 38  | 49  | 47  | 45  | 43  |
| 42  | 55  | 51  | 105 | 122 | 109 | 130 | 128 | 102 | 62  |
| 58  | 49  | 69  | 138 | 148 | 135 | 179 | 171 | 191 | 102 |
| 19  | 17  | 24  | 18  | 30  | 31  | 26  | 23  | 31  | 17  |
| 36  | 42  | 50  | 38  | 41  | 42  | 55  | 50  | 44  | 36  |
| 82  | 82  | 86  | 30  | 43  | 41  | 91  | 95  | 112 | 81  |
| 29  | 46  | 36  | 36  | 53  | 58  | 58  | 66  | 54  | 33  |
| 40  | 40  | 37  | 43  | 76  | 52  | 56  | 32  | 46  | 44  |
| 46  | 52  | 71  | 60  | 55  | 69  | 67  | 58  | 67  | 40  |
| 40  | 38  | 26  | 54  | 67  | 54  | 63  | 42  | 55  | 42  |
| 63  | 48  | 49  | 39  | 41  | 33  | 61  | 62  | 52  | 37  |
| 58  | 78  | 69  | 112 | 125 | 129 | 122 | 111 | 131 | 74  |
| 52  | 51  | 51  | 66  | 78  | 56  | 79  | 105 | 111 | 45  |
| 68  | 68  | 90  | 108 | 142 | 123 | 120 | 96  | 116 | 56  |
| 94  | 95  | 91  | 162 | 210 | 219 | 233 | 209 | 259 | 140 |
| 45  | 51  | 63  | 313 | 387 | 384 | 440 | 388 | 400 | 166 |
| 36  | 35  | 38  | 74  | 93  | 110 | 75  | 69  | 84  | 51  |
| 38  | 44  | 55  | 81  | 87  | 74  | 102 | 88  | 85  | 57  |
| 35  | 40  | 44  | 63  | 99  | 66  | 84  | 82  | 113 | 59  |
| 88  | 75  | 83  | 88  | 111 | 92  | 81  | 72  | 88  | 83  |
| 75  | 55  | 62  | 126 | 154 | 141 | 121 | 109 | 113 | 75  |
| 21  | 20  | 23  | 39  | 53  | 58  | 43  | 22  | 43  | 26  |
| 46  | 40  | 42  | 137 | 161 | 129 | 115 | 78  | 98  | 52  |
| 101 | 129 | 114 | 158 | 224 | 196 | 203 | 245 | 230 | 124 |
| 29  | 17  | 33  | 48  | 94  | 42  | 40  | 50  | 38  | 20  |
| 51  | 61  | 64  | 152 | 222 | 187 | 243 | 266 | 261 | 117 |
| 24  | 18  | 28  | 69  | 105 | 82  | 50  | 71  | 67  | 26  |
| 49  | 63  | 56  | 214 | 235 | 252 | 188 | 185 | 208 | 103 |
| 41  | 48  | 37  | 120 | 159 | 139 | 107 | 96  | 83  | 53  |
| 20  | 27  | 28  | 78  | 117 | 101 | 52  | 44  | 68  | 26  |

|     |     |    |     |     |     |     |     |     |     |
|-----|-----|----|-----|-----|-----|-----|-----|-----|-----|
| 42  | 49  | 46 | 62  | 66  | 59  | 70  | 66  | 68  | 59  |
| 50  | 48  | 62 | 101 | 140 | 117 | 71  | 71  | 81  | 55  |
| 5   | 8   | 11 | 8   | 5   | 10  | 23  | 18  | 18  | 12  |
| 15  | 20  | 31 | 26  | 23  | 11  | 26  | 18  | 22  | 20  |
| 66  | 67  | 66 | 34  | 73  | 52  | 51  | 48  | 51  | 54  |
| 47  | 46  | 55 | 51  | 66  | 55  | 44  | 56  | 54  | 40  |
| 14  | 22  | 13 | 10  | 16  | 12  | 15  | 10  | 23  | 21  |
| 51  | 51  | 42 | 81  | 88  | 84  | 62  | 56  | 56  | 51  |
| 56  | 46  | 64 | 65  | 86  | 71  | 63  | 58  | 56  | 56  |
| 36  | 43  | 53 | 65  | 81  | 67  | 64  | 64  | 58  | 41  |
| 51  | 42  | 45 | 71  | 87  | 57  | 66  | 45  | 62  | 45  |
| 45  | 42  | 54 | 85  | 119 | 110 | 83  | 73  | 89  | 73  |
| 52  | 47  | 57 | 62  | 102 | 83  | 63  | 80  | 114 | 70  |
| 61  | 74  | 80 | 95  | 132 | 91  | 103 | 127 | 123 | 77  |
| 15  | 14  | 16 | 9   | 10  | 7   | 21  | 7   | 20  | 12  |
| 79  | 73  | 84 | 132 | 140 | 138 | 102 | 91  | 106 | 68  |
| 31  | 24  | 34 | 193 | 214 | 173 | 133 | 100 | 129 | 47  |
| 17  | 18  | 15 | 23  | 29  | 24  | 19  | 10  | 18  | 11  |
| 35  | 46  | 37 | 63  | 105 | 84  | 92  | 52  | 80  | 47  |
| 36  | 45  | 52 | 136 | 182 | 128 | 150 | 140 | 149 | 88  |
| 66  | 64  | 75 | 139 | 167 | 128 | 104 | 82  | 103 | 78  |
| 24  | 45  | 50 | 98  | 110 | 108 | 95  | 80  | 72  | 55  |
| 35  | 44  | 40 | 119 | 141 | 114 | 171 | 154 | 146 | 71  |
| 53  | 36  | 31 | 74  | 69  | 71  | 72  | 69  | 80  | 58  |
| 24  | 32  | 27 | 69  | 80  | 62  | 60  | 59  | 59  | 25  |
| 49  | 54  | 59 | 132 | 169 | 120 | 107 | 101 | 115 | 45  |
| 38  | 53  | 42 | 61  | 69  | 62  | 93  | 94  | 92  | 62  |
| 27  | 38  | 45 | 67  | 80  | 95  | 67  | 66  | 71  | 27  |
| 44  | 53  | 46 | 70  | 110 | 61  | 82  | 91  | 83  | 45  |
| 93  | 77  | 68 | 140 | 202 | 182 | 157 | 160 | 176 | 107 |
| 57  | 52  | 72 | 118 | 142 | 143 | 114 | 120 | 136 | 68  |
| 35  | 53  | 38 | 50  | 54  | 54  | 59  | 67  | 70  | 44  |
| 56  | 39  | 61 | 48  | 52  | 44  | 60  | 48  | 47  | 41  |
| 56  | 62  | 54 | 52  | 76  | 70  | 90  | 81  | 94  | 39  |
| 59  | 62  | 56 | 48  | 61  | 61  | 75  | 77  | 77  | 50  |
| 57  | 57  | 56 | 103 | 106 | 116 | 112 | 94  | 97  | 68  |
| 81  | 70  | 93 | 116 | 110 | 103 | 153 | 126 | 117 | 86  |
| 68  | 71  | 69 | 69  | 91  | 75  | 80  | 68  | 90  | 43  |
| 113 | 100 | 96 | 111 | 130 | 103 | 123 | 140 | 112 | 90  |
| 40  | 44  | 40 | 70  | 90  | 72  | 62  | 50  | 61  | 42  |
| 28  | 34  | 39 | 48  | 64  | 46  | 56  | 40  | 59  | 34  |

|     |     |     |     |     |     |     |     |     |     |
|-----|-----|-----|-----|-----|-----|-----|-----|-----|-----|
| 33  | 51  | 53  | 48  | 50  | 52  | 56  | 38  | 64  | 35  |
| 43  | 59  | 58  | 51  | 48  | 67  | 60  | 52  | 51  | 46  |
| 75  | 62  | 71  | 105 | 140 | 119 | 136 | 102 | 108 | 53  |
| 43  | 50  | 46  | 43  | 27  | 45  | 29  | 34  | 42  | 44  |
| 56  | 59  | 56  | 46  | 55  | 57  | 42  | 39  | 38  | 48  |
| 26  | 37  | 29  | 41  | 38  | 65  | 42  | 52  | 38  | 47  |
| 43  | 44  | 53  | 56  | 66  | 64  | 62  | 58  | 80  | 76  |
| 30  | 37  | 30  | 45  | 39  | 50  | 52  | 33  | 48  | 31  |
| 21  | 24  | 18  | 28  | 29  | 37  | 29  | 25  | 21  | 19  |
| 27  | 28  | 18  | 20  | 20  | 20  | 19  | 7   | 13  | 15  |
| 15  | 14  | 9   | 8   | 5   | 4   | 8   | 3   | 11  | 10  |
| 74  | 71  | 66  | 118 | 186 | 157 | 185 | 137 | 185 | 114 |
| 26  | 21  | 28  | 79  | 71  | 89  | 87  | 67  | 85  | 42  |
| 206 | 226 | 228 | 94  | 120 | 143 | 96  | 119 | 110 | 70  |
| 52  | 63  | 59  | 89  | 110 | 89  | 87  | 93  | 102 | 72  |
| 49  | 55  | 56  | 109 | 128 | 135 | 54  | 36  | 39  | 49  |
| 46  | 39  | 47  | 120 | 144 | 121 | 134 | 123 | 154 | 67  |
| 21  | 20  | 23  | 116 | 156 | 136 | 158 | 133 | 158 | 65  |
| 14  | 23  | 20  | 19  | 22  | 14  | 22  | 16  | 19  | 9   |
| 10  | 2   | 11  | 5   | 7   | 11  | 7   | 8   | 6   | 2   |
| 14  | 11  | 9   | 4   | 9   | 2   | 5   | 3   | 4   | 7   |
| 30  | 33  | 40  | 46  | 60  | 59  | 64  | 78  | 74  | 35  |
| 123 | 127 | 153 | 180 | 240 | 183 | 196 | 179 | 156 | 164 |
| 135 | 140 | 165 | 113 | 134 | 125 | 139 | 122 | 135 | 139 |
| 29  | 35  | 37  | 57  | 64  | 38  | 58  | 59  | 70  | 39  |
| 24  | 40  | 31  | 74  | 108 | 77  | 69  | 68  | 73  | 36  |
| 60  | 45  | 42  | 73  | 92  | 77  | 51  | 61  | 62  | 65  |
| 56  | 60  | 60  | 52  | 52  | 43  | 46  | 49  | 51  | 49  |
| 50  | 58  | 50  | 107 | 150 | 134 | 149 | 98  | 114 | 53  |
| 8   | 6   | 6   | 8   | 12  | 6   | 3   | 1   | 5   | 1   |
| 9   | 5   | 8   | 2   | 8   | 2   | 7   | 5   | 0   | 3   |
| 37  | 41  | 42  | 40  | 38  | 55  | 29  | 19  | 42  | 41  |
| 97  | 106 | 83  | 175 | 219 | 204 | 181 | 193 | 186 | 124 |
| 55  | 40  | 51  | 74  | 85  | 80  | 89  | 83  | 83  | 58  |
| 44  | 22  | 33  | 41  | 44  | 38  | 42  | 42  | 45  | 36  |
| 32  | 30  | 27  | 27  | 25  | 27  | 39  | 42  | 48  | 38  |
| 58  | 49  | 46  | 60  | 70  | 63  | 46  | 50  | 60  | 40  |
| 26  | 13  | 32  | 23  | 38  | 36  | 41  | 23  | 46  | 23  |
| 43  | 56  | 46  | 59  | 66  | 64  | 59  | 57  | 78  | 40  |
| 39  | 48  | 38  | 45  | 57  | 56  | 40  | 46  | 44  | 40  |
| 18  | 25  | 25  | 31  | 29  | 31  | 34  | 25  | 34  | 23  |

|    |     |    |     |     |     |     |     |     |     |
|----|-----|----|-----|-----|-----|-----|-----|-----|-----|
| 48 | 37  | 61 | 45  | 61  | 73  | 64  | 67  | 69  | 43  |
| 47 | 58  | 53 | 37  | 59  | 50  | 62  | 57  | 60  | 42  |
| 48 | 33  | 41 | 62  | 59  | 52  | 51  | 51  | 43  | 33  |
| 46 | 53  | 63 | 52  | 57  | 58  | 107 | 58  | 73  | 40  |
| 80 | 73  | 67 | 150 | 162 | 143 | 204 | 137 | 171 | 85  |
| 99 | 103 | 96 | 95  | 107 | 120 | 118 | 102 | 97  | 104 |
| 78 | 84  | 92 | 140 | 159 | 122 | 168 | 142 | 165 | 100 |
| 15 | 24  | 19 | 23  | 25  | 20  | 15  | 22  | 24  | 17  |
| 29 | 36  | 43 | 74  | 79  | 69  | 124 | 121 | 109 | 71  |
| 70 | 49  | 58 | 152 | 193 | 137 | 137 | 113 | 131 | 82  |
| 73 | 74  | 71 | 84  | 78  | 91  | 123 | 114 | 120 | 82  |
| 79 | 70  | 63 | 35  | 41  | 45  | 58  | 72  | 66  | 61  |
| 65 | 90  | 86 | 66  | 102 | 87  | 79  | 101 | 100 | 68  |
| 73 | 63  | 55 | 139 | 195 | 149 | 182 | 150 | 174 | 71  |
| 48 | 38  | 58 | 64  | 91  | 64  | 69  | 53  | 56  | 49  |
| 84 | 68  | 49 | 286 | 386 | 341 | 324 | 295 | 289 | 138 |
| 44 | 52  | 55 | 59  | 55  | 64  | 68  | 38  | 58  | 45  |
| 23 | 12  | 22 | 36  | 44  | 47  | 44  | 36  | 45  | 22  |
| 41 | 35  | 37 | 45  | 60  | 41  | 41  | 34  | 31  | 40  |
| 39 | 42  | 46 | 43  | 46  | 48  | 47  | 35  | 39  | 40  |
| 43 | 49  | 35 | 53  | 54  | 46  | 45  | 37  | 35  | 39  |
| 30 | 48  | 41 | 81  | 99  | 96  | 72  | 73  | 59  | 52  |
| 27 | 31  | 29 | 47  | 49  | 33  | 31  | 24  | 27  | 36  |
| 46 | 52  | 57 | 43  | 70  | 55  | 60  | 35  | 50  | 41  |
| 10 | 6   | 12 | 12  | 15  | 14  | 15  | 8   | 12  | 5   |
| 21 | 23  | 20 | 36  | 32  | 32  | 27  | 18  | 26  | 20  |
| 16 | 24  | 23 | 44  | 52  | 41  | 40  | 37  | 36  | 28  |
| 11 | 10  | 6  | 17  | 25  | 26  | 12  | 7   | 11  | 12  |
| 6  | 2   | 5  | 11  | 12  | 13  | 3   | 7   | 3   | 5   |
| 8  | 14  | 17 | 23  | 28  | 20  | 27  | 24  | 25  | 9   |
| 27 | 29  | 37 | 28  | 36  | 38  | 44  | 35  | 30  | 21  |
| 37 | 52  | 32 | 51  | 82  | 87  | 81  | 85  | 74  | 51  |
| 38 | 20  | 13 | 48  | 43  | 50  | 59  | 71  | 69  | 29  |
| 40 | 38  | 49 | 34  | 39  | 31  | 42  | 48  | 64  | 30  |
| 71 | 59  | 71 | 67  | 61  | 70  | 87  | 83  | 89  | 64  |
| 48 | 45  | 38 | 86  | 112 | 110 | 124 | 93  | 124 | 45  |
| 46 | 49  | 49 | 38  | 41  | 53  | 66  | 52  | 77  | 50  |
| 55 | 43  | 52 | 109 | 114 | 118 | 152 | 117 | 115 | 82  |
| 36 | 44  | 32 | 33  | 34  | 36  | 39  | 51  | 44  | 35  |
| 42 | 29  | 34 | 92  | 107 | 111 | 67  | 78  | 81  | 37  |
| 49 | 34  | 53 | 42  | 70  | 47  | 20  | 28  | 27  | 34  |



|     |    |     |     |     |     |     |     |     |     |
|-----|----|-----|-----|-----|-----|-----|-----|-----|-----|
| 29  | 36 | 33  | 21  | 32  | 17  | 25  | 23  | 21  | 23  |
| 39  | 40 | 25  | 52  | 73  | 59  | 47  | 42  | 43  | 32  |
| 26  | 33 | 31  | 41  | 43  | 50  | 47  | 51  | 44  | 30  |
| 19  | 15 | 15  | 15  | 15  | 15  | 21  | 30  | 15  | 20  |
| 22  | 19 | 22  | 10  | 22  | 18  | 12  | 18  | 14  | 18  |
| 33  | 28 | 24  | 32  | 35  | 36  | 42  | 29  | 26  | 31  |
| 36  | 41 | 42  | 49  | 83  | 67  | 66  | 61  | 50  | 49  |
| 21  | 25 | 35  | 14  | 12  | 11  | 18  | 18  | 17  | 18  |
| 37  | 33 | 32  | 44  | 47  | 52  | 54  | 53  | 47  | 24  |
| 19  | 24 | 35  | 37  | 36  | 41  | 21  | 30  | 30  | 25  |
| 42  | 49 | 48  | 87  | 124 | 105 | 111 | 109 | 96  | 52  |
| 59  | 57 | 57  | 86  | 91  | 74  | 63  | 68  | 97  | 47  |
| 35  | 40 | 49  | 44  | 68  | 64  | 51  | 57  | 52  | 27  |
| 51  | 64 | 45  | 100 | 117 | 115 | 110 | 81  | 83  | 57  |
| 46  | 50 | 50  | 416 | 558 | 455 | 403 | 335 | 389 | 162 |
| 26  | 37 | 31  | 74  | 109 | 98  | 93  | 79  | 88  | 55  |
| 45  | 33 | 47  | 59  | 86  | 76  | 72  | 49  | 53  | 48  |
| 56  | 69 | 65  | 169 | 201 | 158 | 180 | 185 | 179 | 82  |
| 77  | 64 | 86  | 146 | 218 | 198 | 244 | 184 | 197 | 118 |
| 54  | 69 | 64  | 134 | 132 | 141 | 140 | 124 | 133 | 45  |
| 8   | 18 | 29  | 57  | 67  | 70  | 41  | 42  | 51  | 18  |
| 46  | 58 | 42  | 40  | 68  | 52  | 54  | 49  | 48  | 42  |
| 74  | 70 | 68  | 290 | 407 | 349 | 362 | 341 | 327 | 165 |
| 54  | 41 | 53  | 152 | 193 | 185 | 161 | 120 | 145 | 73  |
| 46  | 40 | 51  | 43  | 51  | 35  | 54  | 40  | 48  | 40  |
| 41  | 32 | 43  | 31  | 58  | 46  | 40  | 28  | 28  | 31  |
| 16  | 30 | 17  | 52  | 62  | 38  | 37  | 24  | 23  | 23  |
| 14  | 15 | 33  | 54  | 80  | 49  | 40  | 34  | 43  | 23  |
| 55  | 49 | 50  | 141 | 175 | 201 | 183 | 162 | 196 | 75  |
| 40  | 55 | 67  | 96  | 141 | 109 | 114 | 117 | 116 | 55  |
| 68  | 70 | 54  | 91  | 145 | 117 | 117 | 110 | 118 | 61  |
| 54  | 42 | 42  | 83  | 107 | 78  | 96  | 76  | 79  | 64  |
| 24  | 32 | 27  | 25  | 47  | 35  | 30  | 38  | 39  | 22  |
| 20  | 25 | 36  | 33  | 31  | 53  | 56  | 43  | 44  | 37  |
| 55  | 55 | 65  | 72  | 106 | 98  | 88  | 61  | 88  | 51  |
| 25  | 32 | 31  | 76  | 92  | 75  | 58  | 67  | 56  | 22  |
| 63  | 66 | 74  | 263 | 328 | 334 | 289 | 231 | 287 | 99  |
| 20  | 23 | 14  | 38  | 56  | 24  | 28  | 19  | 31  | 15  |
| 68  | 61 | 78  | 171 | 228 | 171 | 252 | 225 | 240 | 128 |
| 129 | 79 | 113 | 170 | 208 | 201 | 264 | 275 | 295 | 154 |
| 61  | 57 | 77  | 91  | 149 | 142 | 116 | 130 | 131 | 69  |

|    |     |     |     |      |      |     |     |     |     |
|----|-----|-----|-----|------|------|-----|-----|-----|-----|
| 46 | 41  | 38  | 66  | 75   | 70   | 54  | 60  | 72  | 34  |
| 54 | 55  | 55  | 105 | 128  | 119  | 93  | 85  | 103 | 69  |
| 84 | 86  | 92  | 89  | 114  | 104  | 143 | 164 | 173 | 95  |
| 41 | 46  | 46  | 115 | 165  | 137  | 148 | 135 | 129 | 63  |
| 67 | 69  | 70  | 102 | 152  | 116  | 146 | 151 | 138 | 97  |
| 48 | 71  | 63  | 136 | 178  | 172  | 229 | 181 | 168 | 94  |
| 69 | 49  | 62  | 101 | 126  | 94   | 110 | 111 | 113 | 54  |
| 47 | 55  | 51  | 133 | 177  | 177  | 128 | 120 | 107 | 69  |
| 38 | 29  | 35  | 52  | 58   | 51   | 51  | 44  | 53  | 37  |
| 40 | 30  | 33  | 74  | 98   | 88   | 49  | 49  | 48  | 43  |
| 20 | 13  | 16  | 27  | 36   | 14   | 17  | 16  | 18  | 13  |
| 38 | 32  | 51  | 80  | 96   | 70   | 69  | 64  | 82  | 41  |
| 26 | 23  | 42  | 60  | 94   | 70   | 76  | 63  | 49  | 44  |
| 26 | 33  | 28  | 46  | 81   | 67   | 37  | 31  | 28  | 25  |
| 28 | 39  | 44  | 42  | 56   | 39   | 54  | 30  | 38  | 34  |
| 41 | 51  | 32  | 50  | 54   | 46   | 39  | 31  | 42  | 43  |
| 32 | 41  | 25  | 54  | 53   | 56   | 40  | 49  | 61  | 27  |
| 53 | 54  | 54  | 77  | 145  | 114  | 103 | 89  | 120 | 57  |
| 12 | 17  | 19  | 18  | 12   | 13   | 15  | 14  | 10  | 15  |
| 19 | 26  | 29  | 12  | 26   | 20   | 13  | 14  | 24  | 16  |
| 26 | 19  | 35  | 19  | 16   | 23   | 19  | 19  | 7   | 19  |
| 22 | 31  | 45  | 79  | 101  | 67   | 93  | 56  | 59  | 38  |
| 39 | 35  | 38  | 190 | 284  | 206  | 175 | 142 | 158 | 87  |
| 48 | 47  | 62  | 82  | 111  | 99   | 107 | 116 | 115 | 82  |
| 28 | 30  | 29  | 31  | 35   | 47   | 43  | 55  | 44  | 23  |
| 56 | 63  | 47  | 53  | 77   | 66   | 72  | 71  | 73  | 72  |
| 72 | 85  | 71  | 152 | 207  | 169  | 101 | 99  | 105 | 86  |
| 85 | 105 | 102 | 129 | 168  | 157  | 188 | 185 | 197 | 103 |
| 96 | 112 | 114 | 874 | 1063 | 1000 | 802 | 708 | 783 | 350 |
| 41 | 43  | 40  | 72  | 70   | 74   | 73  | 65  | 75  | 50  |
| 51 | 61  | 39  | 81  | 85   | 96   | 85  | 82  | 66  | 43  |
| 15 | 17  | 27  | 21  | 28   | 31   | 32  | 19  | 29  | 18  |
| 13 | 14  | 16  | 11  | 15   | 17   | 12  | 15  | 5   | 10  |
| 35 | 32  | 36  | 36  | 76   | 71   | 56  | 65  | 54  | 43  |
| 24 | 10  | 17  | 26  | 24   | 17   | 20  | 8   | 26  | 20  |
| 43 | 47  | 47  | 88  | 106  | 67   | 62  | 62  | 60  | 49  |
| 42 | 29  | 40  | 59  | 74   | 66   | 41  | 55  | 41  | 49  |
| 52 | 36  | 51  | 79  | 126  | 103  | 77  | 85  | 102 | 58  |
| 44 | 31  | 46  | 82  | 83   | 95   | 91  | 90  | 91  | 55  |
| 49 | 61  | 47  | 113 | 115  | 88   | 97  | 83  | 114 | 53  |
| 36 | 40  | 41  | 114 | 148  | 109  | 85  | 87  | 84  | 47  |

|    |    |    |     |     |     |     |     |     |     |
|----|----|----|-----|-----|-----|-----|-----|-----|-----|
| 30 | 20 | 19 | 74  | 109 | 90  | 84  | 80  | 93  | 46  |
| 47 | 25 | 29 | 56  | 69  | 52  | 42  | 40  | 40  | 31  |
| 23 | 23 | 26 | 79  | 94  | 60  | 36  | 41  | 45  | 29  |
| 46 | 41 | 50 | 80  | 90  | 83  | 63  | 65  | 87  | 55  |
| 43 | 39 | 48 | 158 | 182 | 156 | 134 | 113 | 117 | 66  |
| 14 | 11 | 9  | 7   | 21  | 9   | 10  | 6   | 6   | 5   |
| 21 | 11 | 23 | 19  | 14  | 12  | 24  | 30  | 23  | 19  |
| 50 | 37 | 56 | 56  | 74  | 60  | 66  | 61  | 79  | 43  |
| 12 | 13 | 16 | 10  | 23  | 16  | 14  | 11  | 20  | 8   |
| 60 | 59 | 66 | 26  | 25  | 29  | 43  | 43  | 36  | 64  |
| 15 | 14 | 14 | 13  | 17  | 21  | 9   | 8   | 10  | 8   |
| 32 | 20 | 41 | 230 | 347 | 261 | 236 | 191 | 238 | 95  |
| 22 | 14 | 24 | 66  | 85  | 50  | 66  | 71  | 60  | 32  |
| 32 | 39 | 56 | 203 | 248 | 186 | 244 | 194 | 199 | 82  |
| 40 | 40 | 54 | 142 | 175 | 158 | 166 | 147 | 177 | 103 |
| 19 | 16 | 18 | 117 | 164 | 108 | 92  | 110 | 100 | 35  |
| 41 | 29 | 42 | 136 | 205 | 151 | 168 | 151 | 147 | 73  |
| 22 | 29 | 24 | 71  | 81  | 57  | 72  | 80  | 98  | 30  |
| 18 | 19 | 25 | 31  | 24  | 29  | 35  | 22  | 30  | 21  |
| 33 | 30 | 33 | 55  | 59  | 40  | 46  | 42  | 40  | 36  |
| 56 | 47 | 70 | 51  | 72  | 55  | 57  | 32  | 48  | 48  |
| 41 | 52 | 50 | 64  | 88  | 81  | 70  | 66  | 76  | 32  |
| 28 | 33 | 30 | 50  | 43  | 33  | 29  | 40  | 37  | 21  |
| 22 | 23 | 18 | 44  | 49  | 29  | 50  | 47  | 49  | 28  |
| 23 | 27 | 32 | 10  | 18  | 15  | 12  | 18  | 21  | 17  |
| 17 | 17 | 23 | 19  | 21  | 22  | 23  | 22  | 19  | 21  |
| 0  | 5  | 5  | 0   | 2   | 0   | 5   | 2   | 4   | 4   |
| 39 | 34 | 51 | 77  | 114 | 100 | 62  | 73  | 85  | 57  |
| 93 | 64 | 82 | 103 | 131 | 108 | 133 | 116 | 114 | 74  |
| 45 | 41 | 49 | 54  | 55  | 60  | 55  | 56  | 59  | 41  |
| 39 | 45 | 42 | 68  | 74  | 54  | 62  | 50  | 56  | 44  |
| 69 | 60 | 63 | 147 | 164 | 132 | 159 | 122 | 170 | 75  |
| 52 | 48 | 61 | 66  | 89  | 81  | 109 | 83  | 93  | 62  |
| 66 | 66 | 63 | 70  | 104 | 67  | 68  | 66  | 54  | 62  |
| 67 | 82 | 86 | 143 | 159 | 138 | 141 | 134 | 135 | 86  |
| 47 | 50 | 53 | 85  | 78  | 97  | 90  | 69  | 82  | 49  |
| 29 | 41 | 39 | 56  | 58  | 42  | 36  | 35  | 48  | 31  |
| 40 | 71 | 52 | 111 | 120 | 113 | 98  | 102 | 102 | 62  |
| 63 | 47 | 62 | 166 | 212 | 195 | 190 | 180 | 195 | 94  |
| 53 | 68 | 68 | 60  | 96  | 67  | 79  | 61  | 75  | 56  |
| 36 | 48 | 32 | 77  | 99  | 92  | 92  | 94  | 87  | 52  |

|     |     |     |     |     |     |     |     |     |     |
|-----|-----|-----|-----|-----|-----|-----|-----|-----|-----|
| 50  | 67  | 72  | 130 | 162 | 155 | 128 | 153 | 129 | 91  |
| 46  | 77  | 73  | 103 | 113 | 113 | 93  | 95  | 108 | 61  |
| 75  | 85  | 91  | 113 | 113 | 116 | 149 | 130 | 155 | 94  |
| 106 | 102 | 133 | 109 | 118 | 83  | 121 | 119 | 135 | 104 |
| 45  | 50  | 58  | 91  | 86  | 94  | 113 | 101 | 87  | 49  |
| 33  | 31  | 40  | 54  | 75  | 56  | 50  | 48  | 54  | 28  |
| 64  | 62  | 69  | 181 | 224 | 218 | 144 | 132 | 151 | 98  |
| 52  | 64  | 60  | 71  | 117 | 74  | 77  | 74  | 80  | 43  |
| 42  | 39  | 57  | 37  | 45  | 56  | 69  | 73  | 70  | 57  |
| 46  | 39  | 37  | 55  | 55  | 52  | 47  | 43  | 66  | 38  |
| 52  | 61  | 49  | 61  | 65  | 54  | 74  | 49  | 64  | 63  |
| 41  | 40  | 46  | 65  | 92  | 72  | 69  | 59  | 79  | 54  |
| 20  | 24  | 25  | 16  | 16  | 17  | 13  | 13  | 23  | 18  |
| 17  | 20  | 17  | 18  | 25  | 21  | 23  | 19  | 21  | 20  |
| 20  | 35  | 34  | 46  | 52  | 63  | 35  | 58  | 54  | 35  |
| 47  | 28  | 48  | 98  | 100 | 94  | 75  | 70  | 68  | 48  |
| 25  | 26  | 26  | 22  | 21  | 14  | 22  | 22  | 29  | 27  |
| 61  | 60  | 69  | 81  | 67  | 59  | 66  | 81  | 47  | 63  |
| 42  | 38  | 50  | 43  | 73  | 63  | 72  | 57  | 62  | 37  |
| 38  | 40  | 51  | 58  | 61  | 58  | 36  | 42  | 59  | 33  |
| 31  | 33  | 47  | 55  | 63  | 60  | 40  | 35  | 30  | 28  |
| 31  | 32  | 28  | 14  | 17  | 19  | 16  | 28  | 16  | 32  |
| 53  | 33  | 39  | 39  | 59  | 54  | 39  | 38  | 30  | 37  |
| 62  | 51  | 64  | 101 | 125 | 101 | 133 | 117 | 133 | 75  |
| 13  | 15  | 14  | 17  | 30  | 19  | 13  | 20  | 16  | 12  |
| 69  | 60  | 91  | 86  | 130 | 121 | 100 | 104 | 120 | 72  |
| 35  | 26  | 39  | 73  | 79  | 53  | 60  | 72  | 75  | 37  |
| 49  | 50  | 43  | 110 | 119 | 140 | 97  | 72  | 104 | 61  |
| 37  | 27  | 40  | 52  | 54  | 66  | 61  | 38  | 43  | 47  |
| 58  | 54  | 59  | 101 | 118 | 141 | 133 | 107 | 120 | 55  |
| 55  | 60  | 61  | 109 | 181 | 177 | 174 | 173 | 159 | 87  |
| 32  | 30  | 26  | 29  | 38  | 43  | 45  | 23  | 39  | 30  |
| 42  | 37  | 35  | 59  | 58  | 54  | 41  | 53  | 41  | 36  |
| 63  | 39  | 60  | 177 | 227 | 193 | 184 | 154 | 173 | 88  |
| 47  | 48  | 58  | 48  | 51  | 62  | 55  | 56  | 58  | 41  |
| 30  | 23  | 42  | 49  | 40  | 48  | 44  | 23  | 37  | 37  |
| 45  | 44  | 26  | 54  | 69  | 58  | 70  | 52  | 80  | 37  |
| 34  | 27  | 24  | 23  | 37  | 27  | 30  | 28  | 35  | 37  |
| 34  | 46  | 69  | 121 | 142 | 127 | 113 | 103 | 92  | 44  |
| 60  | 86  | 67  | 99  | 127 | 137 | 150 | 114 | 117 | 82  |
| 39  | 43  | 62  | 43  | 52  | 42  | 45  | 47  | 52  | 49  |

|     |     |     |     |     |     |     |     |     |     |
|-----|-----|-----|-----|-----|-----|-----|-----|-----|-----|
| 41  | 44  | 43  | 38  | 53  | 40  | 49  | 36  | 53  | 41  |
| 16  | 22  | 24  | 43  | 67  | 66  | 46  | 34  | 29  | 26  |
| 28  | 25  | 27  | 111 | 133 | 139 | 78  | 55  | 87  | 44  |
| 25  | 21  | 35  | 43  | 50  | 51  | 40  | 30  | 41  | 28  |
| 34  | 46  | 45  | 51  | 63  | 60  | 48  | 53  | 47  | 54  |
| 31  | 36  | 31  | 95  | 116 | 104 | 82  | 86  | 78  | 46  |
| 31  | 23  | 33  | 52  | 66  | 47  | 32  | 33  | 29  | 32  |
| 58  | 59  | 60  | 277 | 358 | 281 | 297 | 239 | 253 | 126 |
| 38  | 33  | 32  | 68  | 76  | 79  | 74  | 58  | 58  | 49  |
| 59  | 50  | 47  | 74  | 85  | 76  | 82  | 68  | 79  | 42  |
| 41  | 43  | 44  | 195 | 237 | 211 | 175 | 121 | 175 | 77  |
| 57  | 60  | 67  | 59  | 65  | 60  | 64  | 61  | 56  | 48  |
| 39  | 37  | 37  | 262 | 377 | 272 | 195 | 184 | 214 | 89  |
| 9   | 7   | 9   | 25  | 31  | 44  | 33  | 36  | 41  | 26  |
| 34  | 43  | 41  | 65  | 85  | 81  | 79  | 52  | 68  | 56  |
| 54  | 47  | 45  | 56  | 83  | 59  | 60  | 58  | 73  | 47  |
| 36  | 34  | 40  | 22  | 36  | 30  | 29  | 37  | 35  | 33  |
| 27  | 32  | 33  | 59  | 63  | 60  | 78  | 60  | 72  | 39  |
| 45  | 54  | 43  | 54  | 61  | 67  | 79  | 73  | 86  | 61  |
| 19  | 9   | 13  | 4   | 17  | 10  | 13  | 9   | 13  | 7   |
| 24  | 22  | 38  | 46  | 59  | 70  | 71  | 70  | 64  | 29  |
| 27  | 35  | 31  | 20  | 25  | 18  | 23  | 18  | 22  | 27  |
| 60  | 60  | 55  | 116 | 132 | 121 | 134 | 109 | 113 | 69  |
| 25  | 30  | 36  | 32  | 44  | 27  | 13  | 17  | 21  | 15  |
| 30  | 22  | 15  | 30  | 51  | 41  | 34  | 33  | 25  | 23  |
| 32  | 31  | 42  | 70  | 113 | 88  | 49  | 45  | 51  | 56  |
| 31  | 52  | 40  | 43  | 63  | 64  | 40  | 40  | 41  | 38  |
| 17  | 19  | 24  | 100 | 110 | 120 | 57  | 74  | 86  | 32  |
| 38  | 64  | 55  | 61  | 74  | 91  | 83  | 53  | 68  | 49  |
| 43  | 63  | 57  | 59  | 92  | 62  | 54  | 64  | 69  | 43  |
| 29  | 29  | 38  | 45  | 57  | 40  | 46  | 44  | 53  | 40  |
| 64  | 68  | 60  | 70  | 84  | 76  | 112 | 103 | 112 | 82  |
| 15  | 32  | 31  | 38  | 53  | 63  | 17  | 18  | 28  | 15  |
| 62  | 64  | 58  | 101 | 122 | 109 | 78  | 92  | 89  | 68  |
| 41  | 49  | 47  | 88  | 124 | 103 | 80  | 71  | 73  | 57  |
| 31  | 40  | 42  | 68  | 93  | 66  | 76  | 64  | 62  | 41  |
| 34  | 47  | 42  | 66  | 85  | 92  | 92  | 97  | 85  | 51  |
| 27  | 30  | 37  | 59  | 59  | 50  | 50  | 45  | 54  | 38  |
| 159 | 165 | 199 | 108 | 125 | 112 | 133 | 123 | 171 | 157 |
| 93  | 75  | 81  | 55  | 76  | 65  | 85  | 83  | 85  | 93  |
| 103 | 115 | 136 | 40  | 50  | 45  | 76  | 71  | 76  | 102 |

|     |     |     |     |     |     |     |     |     |     |
|-----|-----|-----|-----|-----|-----|-----|-----|-----|-----|
| 43  | 34  | 57  | 22  | 30  | 41  | 27  | 15  | 25  | 39  |
| 76  | 102 | 110 | 146 | 155 | 147 | 228 | 192 | 200 | 130 |
| 221 | 225 | 256 | 105 | 118 | 94  | 124 | 116 | 144 | 197 |
| 29  | 20  | 24  | 13  | 21  | 14  | 28  | 24  | 16  | 27  |
| 77  | 96  | 104 | 66  | 82  | 73  | 89  | 89  | 89  | 84  |
| 27  | 22  | 23  | 36  | 49  | 21  | 22  | 26  | 27  | 30  |
| 57  | 49  | 52  | 58  | 64  | 65  | 70  | 82  | 81  | 46  |
| 118 | 104 | 142 | 71  | 109 | 75  | 105 | 90  | 91  | 124 |
| 27  | 18  | 25  | 9   | 21  | 38  | 36  | 37  | 37  | 25  |
| 65  | 46  | 69  | 94  | 116 | 117 | 99  | 83  | 91  | 69  |
| 60  | 62  | 63  | 41  | 52  | 53  | 44  | 61  | 51  | 44  |
| 19  | 20  | 26  | 9   | 14  | 8   | 6   | 8   | 11  | 28  |
| 36  | 32  | 32  | 16  | 16  | 21  | 12  | 17  | 22  | 25  |
| 48  | 42  | 44  | 141 | 196 | 131 | 140 | 113 | 140 | 76  |
| 36  | 35  | 46  | 53  | 42  | 44  | 47  | 36  | 38  | 41  |
| 94  | 86  | 98  | 112 | 157 | 108 | 141 | 139 | 131 | 77  |
| 50  | 44  | 37  | 49  | 51  | 52  | 70  | 59  | 75  | 50  |
| 53  | 49  | 56  | 128 | 170 | 142 | 107 | 86  | 82  | 57  |
| 49  | 54  | 52  | 97  | 131 | 100 | 71  | 62  | 73  | 40  |
| 31  | 33  | 27  | 49  | 62  | 51  | 46  | 48  | 58  | 38  |
| 37  | 37  | 37  | 40  | 50  | 51  | 44  | 44  | 48  | 41  |
| 26  | 32  | 34  | 79  | 91  | 77  | 72  | 63  | 70  | 34  |
| 37  | 42  | 50  | 101 | 109 | 87  | 116 | 100 | 123 | 68  |
| 28  | 26  | 27  | 65  | 90  | 70  | 60  | 64  | 58  | 30  |
| 33  | 19  | 37  | 66  | 64  | 50  | 51  | 39  | 49  | 38  |
| 50  | 46  | 57  | 67  | 110 | 89  | 130 | 118 | 133 | 82  |
| 38  | 49  | 51  | 63  | 87  | 86  | 78  | 121 | 95  | 59  |
| 26  | 48  | 34  | 50  | 57  | 55  | 57  | 70  | 71  | 57  |
| 37  | 31  | 49  | 127 | 177 | 156 | 215 | 205 | 238 | 103 |
| 35  | 23  | 31  | 44  | 60  | 47  | 48  | 39  | 50  | 36  |
| 38  | 37  | 51  | 80  | 108 | 96  | 99  | 92  | 106 | 64  |
| 35  | 29  | 34  | 90  | 92  | 84  | 88  | 76  | 95  | 47  |
| 58  | 58  | 56  | 57  | 112 | 107 | 68  | 77  | 82  | 47  |
| 48  | 48  | 63  | 151 | 183 | 140 | 161 | 155 | 149 | 77  |
| 34  | 36  | 36  | 50  | 67  | 53  | 46  | 39  | 38  | 30  |
| 19  | 17  | 23  | 25  | 33  | 35  | 10  | 20  | 11  | 20  |
| 54  | 62  | 47  | 63  | 94  | 88  | 66  | 67  | 73  | 48  |
| 49  | 40  | 47  | 109 | 133 | 140 | 107 | 85  | 106 | 55  |
| 63  | 25  | 41  | 44  | 65  | 49  | 60  | 53  | 64  | 45  |
| 31  | 35  | 32  | 42  | 50  | 42  | 45  | 40  | 41  | 37  |
| 24  | 21  | 27  | 33  | 49  | 40  | 33  | 28  | 25  | 21  |

|     |     |     |     |     |     |     |     |     |     |
|-----|-----|-----|-----|-----|-----|-----|-----|-----|-----|
| 31  | 42  | 49  | 55  | 80  | 77  | 84  | 76  | 53  | 44  |
| 63  | 61  | 61  | 77  | 109 | 86  | 89  | 104 | 122 | 72  |
| 101 | 107 | 139 | 118 | 212 | 171 | 214 | 172 | 196 | 126 |
| 17  | 20  | 17  | 30  | 41  | 38  | 36  | 24  | 27  | 24  |
| 80  | 91  | 103 | 98  | 109 | 124 | 111 | 109 | 120 | 80  |
| 59  | 58  | 73  | 76  | 104 | 61  | 88  | 76  | 95  | 60  |
| 12  | 7   | 9   | 12  | 14  | 16  | 14  | 14  | 9   | 8   |
| 3   | 3   | 5   | 8   | 15  | 11  | 13  | 3   | 4   | 4   |
| 39  | 32  | 48  | 11  | 24  | 11  | 27  | 18  | 14  | 27  |
| 53  | 63  | 70  | 80  | 95  | 92  | 72  | 72  | 79  | 44  |
| 18  | 10  | 24  | 26  | 27  | 23  | 20  | 11  | 25  | 18  |
| 17  | 19  | 23  | 69  | 67  | 49  | 37  | 46  | 38  | 28  |
| 6   | 18  | 13  | 40  | 37  | 27  | 19  | 20  | 23  | 15  |
| 33  | 24  | 34  | 26  | 49  | 37  | 26  | 22  | 20  | 15  |
| 22  | 44  | 43  | 34  | 57  | 35  | 42  | 34  | 44  | 23  |
| 101 | 104 | 105 | 92  | 94  | 82  | 129 | 120 | 139 | 92  |
| 69  | 58  | 61  | 55  | 58  | 61  | 46  | 30  | 40  | 35  |
| 146 | 129 | 129 | 188 | 238 | 200 | 236 | 234 | 230 | 160 |
| 102 | 114 | 125 | 116 | 158 | 133 | 150 | 127 | 158 | 112 |
| 51  | 40  | 49  | 49  | 71  | 49  | 60  | 35  | 52  | 36  |
| 50  | 51  | 55  | 94  | 103 | 85  | 88  | 74  | 75  | 54  |
| 25  | 29  | 33  | 46  | 48  | 41  | 36  | 38  | 33  | 31  |
| 42  | 45  | 53  | 77  | 69  | 66  | 53  | 70  | 82  | 45  |
| 200 | 213 | 226 | 105 | 113 | 118 | 181 | 180 | 178 | 170 |
| 41  | 31  | 47  | 35  | 50  | 36  | 56  | 50  | 67  | 38  |
| 23  | 27  | 37  | 46  | 70  | 67  | 90  | 91  | 99  | 34  |
| 19  | 17  | 22  | 38  | 43  | 39  | 49  | 53  | 52  | 27  |
| 56  | 56  | 45  | 61  | 64  | 66  | 86  | 84  | 83  | 54  |
| 46  | 41  | 42  | 36  | 60  | 53  | 77  | 63  | 61  | 42  |
| 33  | 34  | 33  | 37  | 46  | 45  | 46  | 71  | 63  | 32  |
| 42  | 35  | 45  | 49  | 77  | 54  | 91  | 76  | 100 | 50  |
| 7   | 4   | 11  | 7   | 13  | 10  | 20  | 19  | 22  | 10  |
| 34  | 48  | 40  | 94  | 120 | 94  | 67  | 71  | 79  | 45  |
| 40  | 46  | 30  | 51  | 41  | 47  | 51  | 54  | 46  | 37  |
| 19  | 13  | 14  | 14  | 13  | 18  | 12  | 11  | 22  | 16  |
| 33  | 40  | 46  | 45  | 57  | 63  | 60  | 55  | 40  | 39  |
| 85  | 95  | 114 | 147 | 161 | 144 | 151 | 139 | 151 | 92  |
| 19  | 19  | 25  | 30  | 35  | 29  | 25  | 30  | 30  | 17  |
| 59  | 65  | 62  | 87  | 115 | 101 | 94  | 84  | 85  | 76  |
| 54  | 47  | 63  | 35  | 39  | 42  | 30  | 34  | 41  | 48  |
| 52  | 50  | 71  | 88  | 124 | 124 | 77  | 87  | 82  | 62  |

|    |    |    |     |     |     |     |     |     |     |
|----|----|----|-----|-----|-----|-----|-----|-----|-----|
| 45 | 37 | 42 | 280 | 365 | 312 | 242 | 271 | 264 | 125 |
| 42 | 35 | 47 | 215 | 322 | 244 | 349 | 322 | 376 | 134 |
| 20 | 29 | 33 | 9   | 14  | 24  | 20  | 17  | 18  | 20  |
| 48 | 38 | 51 | 52  | 110 | 75  | 66  | 56  | 54  | 49  |
| 45 | 28 | 38 | 102 | 155 | 119 | 103 | 110 | 89  | 53  |
| 29 | 14 | 22 | 40  | 53  | 53  | 29  | 32  | 34  | 33  |
| 46 | 42 | 48 | 84  | 103 | 85  | 94  | 98  | 101 | 77  |
| 17 | 14 | 19 | 22  | 25  | 34  | 24  | 24  | 21  | 23  |
| 26 | 46 | 28 | 57  | 53  | 38  | 44  | 44  | 46  | 32  |
| 57 | 61 | 66 | 91  | 107 | 91  | 76  | 85  | 83  | 49  |
| 65 | 72 | 55 | 69  | 85  | 58  | 122 | 110 | 127 | 73  |
| 51 | 56 | 72 | 88  | 100 | 96  | 91  | 66  | 105 | 53  |
| 58 | 54 | 46 | 88  | 125 | 107 | 98  | 108 | 108 | 52  |
| 88 | 88 | 76 | 75  | 116 | 99  | 138 | 118 | 120 | 86  |
| 12 | 21 | 16 | 26  | 41  | 18  | 26  | 21  | 24  | 15  |
| 31 | 37 | 42 | 91  | 123 | 89  | 83  | 63  | 77  | 38  |
| 31 | 50 | 29 | 50  | 76  | 74  | 74  | 62  | 69  | 42  |
| 67 | 63 | 63 | 126 | 159 | 137 | 143 | 122 | 119 | 82  |
| 64 | 66 | 62 | 332 | 394 | 285 | 322 | 380 | 334 | 141 |
| 51 | 50 | 58 | 41  | 58  | 55  | 63  | 68  | 58  | 55  |
| 60 | 63 | 53 | 75  | 72  | 83  | 75  | 96  | 113 | 77  |
| 43 | 46 | 47 | 42  | 53  | 36  | 55  | 64  | 48  | 45  |
| 67 | 64 | 66 | 60  | 97  | 79  | 99  | 83  | 94  | 75  |
| 23 | 28 | 33 | 44  | 51  | 50  | 62  | 52  | 61  | 33  |
| 52 | 66 | 69 | 67  | 88  | 91  | 109 | 81  | 116 | 68  |
| 71 | 79 | 64 | 154 | 183 | 162 | 191 | 172 | 194 | 108 |
| 51 | 69 | 54 | 114 | 138 | 121 | 131 | 132 | 128 | 62  |
| 58 | 60 | 42 | 59  | 75  | 70  | 89  | 77  | 77  | 59  |
| 43 | 44 | 59 | 65  | 71  | 63  | 67  | 98  | 81  | 59  |
| 31 | 34 | 33 | 40  | 28  | 30  | 33  | 30  | 35  | 24  |
| 35 | 33 | 40 | 34  | 24  | 36  | 42  | 31  | 47  | 28  |
| 23 | 15 | 28 | 15  | 21  | 18  | 9   | 8   | 14  | 24  |
| 15 | 34 | 20 | 31  | 29  | 38  | 30  | 21  | 23  | 33  |
| 24 | 32 | 30 | 39  | 49  | 52  | 65  | 51  | 57  | 34  |
| 3  | 4  | 6  | 8   | 6   | 1   | 2   | 3   | 5   | 5   |
| 32 | 19 | 25 | 41  | 42  | 31  | 44  | 40  | 48  | 19  |
| 18 | 19 | 22 | 16  | 40  | 30  | 32  | 29  | 20  | 23  |
| 31 | 37 | 45 | 26  | 44  | 25  | 34  | 33  | 25  | 36  |
| 34 | 43 | 30 | 39  | 38  | 26  | 38  | 38  | 41  | 36  |
| 36 | 40 | 40 | 28  | 44  | 29  | 44  | 36  | 50  | 34  |
| 47 | 41 | 54 | 36  | 71  | 64  | 35  | 35  | 37  | 37  |



|     |     |     |     |     |     |     |     |     |     |
|-----|-----|-----|-----|-----|-----|-----|-----|-----|-----|
| 72  | 77  | 89  | 113 | 124 | 90  | 157 | 156 | 160 | 90  |
| 64  | 59  | 69  | 64  | 97  | 68  | 80  | 62  | 73  | 55  |
| 70  | 77  | 85  | 83  | 98  | 97  | 94  | 84  | 98  | 74  |
| 51  | 49  | 69  | 117 | 144 | 104 | 153 | 127 | 128 | 75  |
| 42  | 40  | 48  | 41  | 57  | 44  | 44  | 44  | 45  | 43  |
| 74  | 72  | 58  | 62  | 73  | 59  | 80  | 73  | 79  | 69  |
| 65  | 49  | 62  | 59  | 86  | 52  | 74  | 68  | 63  | 49  |
| 93  | 68  | 83  | 80  | 112 | 116 | 122 | 106 | 115 | 83  |
| 89  | 77  | 76  | 109 | 132 | 122 | 183 | 174 | 153 | 79  |
| 75  | 75  | 65  | 89  | 100 | 78  | 104 | 105 | 124 | 71  |
| 69  | 82  | 80  | 96  | 112 | 100 | 189 | 162 | 179 | 102 |
| 84  | 96  | 85  | 48  | 69  | 71  | 88  | 74  | 89  | 72  |
| 34  | 41  | 36  | 44  | 48  | 46  | 55  | 45  | 64  | 39  |
| 51  | 51  | 55  | 135 | 161 | 89  | 134 | 135 | 161 | 64  |
| 58  | 46  | 64  | 52  | 65  | 59  | 64  | 53  | 64  | 46  |
| 48  | 49  | 40  | 89  | 97  | 68  | 74  | 69  | 57  | 43  |
| 27  | 32  | 31  | 39  | 55  | 41  | 53  | 33  | 39  | 26  |
| 40  | 31  | 34  | 52  | 64  | 50  | 46  | 48  | 41  | 38  |
| 49  | 48  | 58  | 34  | 38  | 32  | 44  | 31  | 34  | 42  |
| 147 | 157 | 161 | 141 | 189 | 154 | 173 | 170 | 187 | 111 |
| 59  | 59  | 58  | 100 | 109 | 105 | 127 | 115 | 121 | 77  |
| 56  | 50  | 62  | 45  | 60  | 76  | 56  | 47  | 48  | 54  |
| 37  | 25  | 24  | 25  | 43  | 35  | 35  | 32  | 33  | 31  |
| 11  | 25  | 30  | 16  | 24  | 12  | 23  | 18  | 25  | 13  |
| 35  | 43  | 40  | 67  | 80  | 84  | 68  | 81  | 76  | 59  |
| 62  | 54  | 76  | 47  | 70  | 65  | 63  | 40  | 49  | 38  |
| 52  | 56  | 57  | 55  | 76  | 63  | 75  | 57  | 72  | 46  |
| 54  | 55  | 55  | 98  | 117 | 100 | 131 | 142 | 156 | 67  |
| 44  | 48  | 45  | 69  | 73  | 53  | 124 | 106 | 99  | 64  |
| 62  | 62  | 66  | 72  | 91  | 70  | 60  | 64  | 70  | 53  |
| 38  | 38  | 32  | 55  | 57  | 61  | 66  | 54  | 72  | 38  |
| 44  | 47  | 49  | 74  | 75  | 86  | 61  | 59  | 58  | 51  |
| 14  | 16  | 22  | 28  | 43  | 34  | 24  | 16  | 25  | 14  |
| 27  | 43  | 34  | 32  | 44  | 37  | 37  | 25  | 28  | 27  |
| 37  | 39  | 48  | 57  | 65  | 46  | 56  | 49  | 54  | 35  |
| 35  | 21  | 36  | 38  | 47  | 43  | 32  | 32  | 31  | 17  |
| 141 | 113 | 118 | 110 | 163 | 114 | 197 | 178 | 210 | 116 |
| 30  | 38  | 35  | 63  | 90  | 66  | 61  | 47  | 41  | 21  |
| 50  | 47  | 60  | 39  | 58  | 34  | 59  | 54  | 48  | 46  |
| 73  | 51  | 57  | 94  | 141 | 98  | 95  | 83  | 93  | 49  |
| 25  | 25  | 30  | 44  | 60  | 47  | 53  | 53  | 55  | 35  |

|     |    |     |     |     |     |     |     |     |     |
|-----|----|-----|-----|-----|-----|-----|-----|-----|-----|
| 62  | 72 | 69  | 97  | 105 | 89  | 111 | 100 | 109 | 75  |
| 20  | 19 | 20  | 28  | 36  | 21  | 20  | 18  | 8   | 21  |
| 50  | 49 | 41  | 49  | 59  | 45  | 66  | 48  | 74  | 41  |
| 72  | 63 | 68  | 61  | 67  | 84  | 48  | 39  | 65  | 41  |
| 66  | 80 | 80  | 109 | 121 | 139 | 111 | 93  | 110 | 58  |
| 45  | 51 | 39  | 81  | 104 | 98  | 73  | 60  | 75  | 53  |
| 56  | 59 | 66  | 148 | 172 | 152 | 125 | 127 | 115 | 77  |
| 22  | 43 | 28  | 387 | 490 | 405 | 350 | 324 | 340 | 129 |
| 25  | 24 | 41  | 30  | 28  | 41  | 39  | 35  | 47  | 27  |
| 31  | 35 | 41  | 58  | 70  | 48  | 32  | 40  | 40  | 30  |
| 25  | 22 | 33  | 25  | 32  | 18  | 29  | 17  | 13  | 21  |
| 90  | 83 | 91  | 134 | 140 | 116 | 164 | 147 | 162 | 98  |
| 36  | 29 | 39  | 40  | 49  | 27  | 36  | 40  | 37  | 26  |
| 41  | 42 | 52  | 59  | 62  | 45  | 51  | 43  | 46  | 38  |
| 54  | 46 | 58  | 70  | 79  | 75  | 58  | 58  | 68  | 34  |
| 34  | 44 | 59  | 68  | 75  | 68  | 46  | 56  | 53  | 44  |
| 32  | 33 | 26  | 53  | 66  | 51  | 47  | 35  | 36  | 28  |
| 39  | 37 | 49  | 108 | 123 | 87  | 89  | 77  | 94  | 63  |
| 46  | 20 | 35  | 43  | 61  | 58  | 44  | 48  | 48  | 24  |
| 7   | 16 | 22  | 37  | 40  | 44  | 19  | 25  | 27  | 20  |
| 30  | 25 | 35  | 57  | 63  | 48  | 56  | 55  | 50  | 33  |
| 47  | 37 | 34  | 23  | 24  | 16  | 21  | 19  | 26  | 28  |
| 50  | 34 | 37  | 47  | 41  | 38  | 55  | 46  | 48  | 42  |
| 37  | 56 | 63  | 118 | 168 | 148 | 173 | 136 | 165 | 71  |
| 26  | 18 | 36  | 22  | 30  | 29  | 41  | 31  | 36  | 34  |
| 54  | 58 | 48  | 52  | 66  | 41  | 47  | 46  | 54  | 49  |
| 35  | 23 | 41  | 44  | 42  | 48  | 31  | 34  | 48  | 33  |
| 62  | 57 | 70  | 54  | 89  | 82  | 74  | 77  | 87  | 49  |
| 47  | 46 | 44  | 59  | 71  | 54  | 67  | 50  | 41  | 59  |
| 44  | 43 | 51  | 25  | 28  | 19  | 29  | 22  | 27  | 33  |
| 108 | 97 | 135 | 103 | 145 | 99  | 137 | 117 | 111 | 109 |
| 41  | 50 | 53  | 136 | 147 | 128 | 103 | 79  | 87  | 47  |
| 30  | 33 | 36  | 31  | 49  | 50  | 36  | 38  | 27  | 22  |
| 81  | 81 | 77  | 149 | 176 | 159 | 235 | 170 | 205 | 101 |
| 72  | 61 | 81  | 206 | 273 | 256 | 223 | 205 | 252 | 115 |
| 110 | 99 | 108 | 138 | 179 | 136 | 247 | 246 | 246 | 131 |
| 34  | 27 | 38  | 86  | 124 | 101 | 151 | 139 | 164 | 61  |
| 27  | 33 | 43  | 121 | 150 | 136 | 142 | 112 | 152 | 83  |
| 50  | 51 | 55  | 197 | 280 | 226 | 207 | 183 | 199 | 97  |
| 75  | 66 | 73  | 149 | 186 | 152 | 187 | 157 | 199 | 100 |
| 35  | 67 | 45  | 145 | 156 | 155 | 163 | 147 | 185 | 83  |

|     |     |     |     |     |     |     |     |     |     |
|-----|-----|-----|-----|-----|-----|-----|-----|-----|-----|
| 59  | 42  | 70  | 94  | 126 | 110 | 138 | 121 | 137 | 65  |
| 31  | 49  | 47  | 107 | 109 | 102 | 81  | 82  | 78  | 61  |
| 111 | 143 | 146 | 79  | 117 | 89  | 147 | 136 | 131 | 119 |
| 69  | 59  | 76  | 65  | 65  | 70  | 63  | 54  | 57  | 66  |
| 77  | 64  | 75  | 68  | 71  | 45  | 64  | 62  | 63  | 70  |
| 99  | 96  | 93  | 45  | 92  | 59  | 68  | 76  | 65  | 88  |
| 40  | 30  | 38  | 51  | 48  | 48  | 39  | 34  | 47  | 32  |
| 29  | 40  | 25  | 37  | 58  | 40  | 48  | 33  | 46  | 36  |
| 82  | 85  | 83  | 79  | 95  | 103 | 123 | 114 | 132 | 84  |
| 73  | 86  | 64  | 44  | 59  | 65  | 73  | 71  | 53  | 49  |
| 70  | 85  | 63  | 43  | 77  | 61  | 58  | 54  | 60  | 49  |
| 83  | 78  | 80  | 52  | 52  | 55  | 62  | 41  | 53  | 76  |
| 59  | 57  | 62  | 37  | 64  | 47  | 62  | 45  | 58  | 43  |
| 45  | 55  | 47  | 54  | 46  | 61  | 61  | 39  | 56  | 50  |
| 31  | 42  | 41  | 75  | 82  | 79  | 67  | 52  | 54  | 43  |
| 44  | 44  | 41  | 67  | 73  | 70  | 70  | 56  | 62  | 49  |
| 37  | 34  | 46  | 60  | 68  | 61  | 50  | 52  | 59  | 39  |
| 35  | 52  | 43  | 143 | 134 | 112 | 127 | 125 | 121 | 61  |
| 24  | 44  | 45  | 46  | 50  | 40  | 53  | 39  | 52  | 42  |
| 46  | 33  | 39  | 84  | 104 | 106 | 66  | 71  | 66  | 39  |
| 44  | 42  | 35  | 38  | 40  | 34  | 43  | 36  | 47  | 51  |
| 41  | 41  | 49  | 181 | 223 | 199 | 184 | 172 | 196 | 60  |
| 40  | 32  | 43  | 37  | 53  | 55  | 42  | 49  | 41  | 47  |
| 33  | 45  | 41  | 39  | 64  | 54  | 52  | 44  | 39  | 35  |
| 34  | 32  | 30  | 40  | 55  | 32  | 46  | 39  | 44  | 22  |
| 66  | 47  | 80  | 116 | 149 | 146 | 120 | 97  | 130 | 70  |
| 25  | 25  | 36  | 46  | 60  | 56  | 45  | 35  | 50  | 22  |
| 44  | 63  | 65  | 90  | 116 | 102 | 99  | 99  | 104 | 63  |
| 25  | 24  | 15  | 12  | 18  | 17  | 24  | 16  | 24  | 28  |
| 42  | 34  | 35  | 56  | 54  | 43  | 48  | 52  | 48  | 40  |
| 36  | 32  | 45  | 87  | 115 | 107 | 113 | 111 | 89  | 64  |
| 27  | 30  | 40  | 86  | 111 | 86  | 97  | 98  | 125 | 54  |
| 50  | 39  | 43  | 67  | 87  | 82  | 67  | 60  | 50  | 32  |
| 84  | 81  | 75  | 71  | 92  | 78  | 96  | 102 | 113 | 75  |
| 43  | 32  | 32  | 18  | 19  | 27  | 12  | 19  | 22  | 21  |
| 29  | 43  | 47  | 52  | 50  | 37  | 55  | 45  | 51  | 47  |
| 47  | 62  | 77  | 71  | 70  | 89  | 79  | 79  | 81  | 56  |
| 34  | 45  | 25  | 25  | 44  | 29  | 38  | 35  | 31  | 39  |
| 40  | 56  | 44  | 37  | 65  | 58  | 59  | 46  | 66  | 42  |
| 27  | 29  | 32  | 45  | 32  | 27  | 26  | 28  | 23  | 26  |
| 3   | 1   | 3   | 3   | 3   | 5   | 3   | 2   | 2   | 1   |

|     |     |     |     |     |     |     |     |     |     |
|-----|-----|-----|-----|-----|-----|-----|-----|-----|-----|
| 38  | 34  | 49  | 38  | 37  | 49  | 39  | 32  | 56  | 31  |
| 48  | 39  | 50  | 101 | 94  | 73  | 103 | 76  | 90  | 52  |
| 222 | 183 | 228 | 84  | 108 | 97  | 214 | 175 | 207 | 216 |
| 12  | 24  | 27  | 19  | 29  | 12  | 16  | 20  | 21  | 25  |
| 5   | 4   | 7   | 11  | 8   | 6   | 6   | 8   | 4   | 4   |
| 25  | 14  | 31  | 32  | 57  | 33  | 46  | 31  | 34  | 18  |
| 34  | 28  | 45  | 68  | 58  | 66  | 63  | 59  | 69  | 57  |
| 68  | 64  | 60  | 65  | 77  | 57  | 106 | 73  | 71  | 70  |
| 53  | 46  | 50  | 58  | 76  | 70  | 55  | 62  | 76  | 50  |
| 80  | 74  | 97  | 48  | 64  | 58  | 106 | 109 | 92  | 76  |
| 106 | 92  | 96  | 126 | 154 | 141 | 161 | 148 | 160 | 102 |
| 43  | 47  | 44  | 155 | 179 | 162 | 153 | 137 | 151 | 87  |
| 68  | 73  | 62  | 46  | 76  | 62  | 55  | 56  | 70  | 65  |
| 56  | 45  | 51  | 63  | 84  | 61  | 57  | 52  | 56  | 32  |
| 40  | 38  | 45  | 29  | 37  | 40  | 48  | 39  | 37  | 36  |
| 26  | 35  | 20  | 88  | 115 | 97  | 121 | 115 | 119 | 64  |
| 31  | 25  | 36  | 42  | 54  | 44  | 32  | 25  | 41  | 27  |
| 51  | 56  | 45  | 91  | 88  | 82  | 85  | 66  | 71  | 43  |
| 21  | 16  | 29  | 22  | 39  | 18  | 32  | 21  | 41  | 19  |
| 26  | 22  | 35  | 55  | 63  | 36  | 54  | 43  | 50  | 27  |
| 46  | 34  | 41  | 38  | 32  | 34  | 32  | 34  | 33  | 36  |
| 57  | 57  | 50  | 58  | 72  | 75  | 71  | 58  | 86  | 43  |
| 66  | 64  | 48  | 82  | 120 | 103 | 73  | 68  | 86  | 66  |
| 15  | 14  | 17  | 17  | 20  | 19  | 29  | 24  | 22  | 13  |
| 49  | 40  | 57  | 45  | 55  | 68  | 59  | 53  | 66  | 51  |
| 94  | 67  | 85  | 107 | 145 | 122 | 131 | 109 | 137 | 77  |
| 22  | 29  | 30  | 162 | 195 | 175 | 142 | 128 | 141 | 62  |
| 41  | 34  | 25  | 32  | 44  | 35  | 38  | 41  | 29  | 18  |
| 29  | 38  | 39  | 32  | 28  | 31  | 28  | 25  | 21  | 36  |
| 35  | 33  | 39  | 101 | 130 | 107 | 117 | 93  | 113 | 45  |
| 72  | 96  | 97  | 57  | 80  | 82  | 104 | 94  | 94  | 102 |
| 101 | 85  | 107 | 90  | 81  | 93  | 108 | 124 | 115 | 78  |
| 24  | 34  | 39  | 54  | 50  | 41  | 78  | 68  | 68  | 38  |
| 56  | 49  | 57  | 53  | 54  | 41  | 60  | 72  | 58  | 45  |
| 35  | 46  | 46  | 40  | 62  | 45  | 46  | 55  | 69  | 40  |
| 51  | 47  | 57  | 29  | 38  | 33  | 61  | 68  | 59  | 47  |
| 15  | 30  | 23  | 8   | 17  | 19  | 14  | 16  | 16  | 7   |
| 32  | 48  | 45  | 79  | 78  | 77  | 73  | 70  | 78  | 46  |
| 33  | 33  | 34  | 30  | 32  | 30  | 29  | 29  | 26  | 22  |
| 46  | 39  | 53  | 74  | 79  | 66  | 95  | 83  | 82  | 58  |
| 30  | 27  | 30  | 21  | 23  | 25  | 34  | 26  | 36  | 18  |

|     |     |     |     |     |     |     |     |     |     |
|-----|-----|-----|-----|-----|-----|-----|-----|-----|-----|
| 18  | 26  | 20  | 27  | 44  | 25  | 38  | 23  | 40  | 22  |
| 5   | 6   | 8   | 7   | 6   | 10  | 10  | 9   | 13  | 6   |
| 14  | 7   | 9   | 7   | 15  | 12  | 21  | 15  | 21  | 9   |
| 11  | 12  | 14  | 14  | 18  | 9   | 19  | 13  | 14  | 14  |
| 0   | 0   | 1   | 0   | 2   | 1   | 1   | 0   | 1   | 0   |
| 15  | 16  | 17  | 18  | 29  | 30  | 40  | 44  | 43  | 24  |
| 92  | 82  | 93  | 130 | 163 | 117 | 201 | 203 | 213 | 126 |
| 68  | 78  | 82  | 96  | 109 | 113 | 127 | 97  | 112 | 64  |
| 63  | 61  | 52  | 77  | 105 | 91  | 62  | 64  | 79  | 44  |
| 33  | 47  | 46  | 97  | 123 | 108 | 126 | 112 | 127 | 70  |
| 61  | 69  | 69  | 52  | 65  | 57  | 77  | 72  | 74  | 51  |
| 94  | 94  | 115 | 74  | 98  | 103 | 95  | 116 | 110 | 86  |
| 124 | 112 | 141 | 119 | 136 | 138 | 108 | 114 | 132 | 77  |
| 106 | 95  | 121 | 137 | 165 | 142 | 210 | 183 | 232 | 141 |
| 40  | 48  | 50  | 60  | 72  | 61  | 58  | 56  | 75  | 51  |
| 12  | 20  | 21  | 42  | 57  | 34  | 39  | 39  | 50  | 21  |
| 50  | 55  | 68  | 94  | 101 | 90  | 98  | 102 | 104 | 67  |
| 108 | 99  | 96  | 103 | 144 | 100 | 108 | 115 | 131 | 70  |
| 17  | 15  | 23  | 27  | 21  | 16  | 25  | 15  | 19  | 16  |
| 64  | 55  | 63  | 100 | 120 | 90  | 87  | 72  | 90  | 69  |
| 38  | 30  | 41  | 112 | 134 | 120 | 132 | 135 | 123 | 60  |
| 19  | 15  | 28  | 44  | 69  | 35  | 39  | 30  | 45  | 27  |
| 35  | 23  | 31  | 89  | 121 | 93  | 144 | 125 | 115 | 71  |
| 36  | 21  | 31  | 77  | 110 | 81  | 82  | 76  | 80  | 41  |
| 34  | 48  | 51  | 131 | 180 | 141 | 174 | 137 | 152 | 80  |
| 65  | 56  | 70  | 87  | 122 | 133 | 84  | 99  | 95  | 58  |
| 57  | 56  | 65  | 58  | 62  | 79  | 48  | 45  | 49  | 40  |
| 25  | 32  | 26  | 64  | 77  | 61  | 44  | 59  | 56  | 39  |
| 53  | 41  | 51  | 118 | 137 | 116 | 67  | 81  | 73  | 49  |
| 93  | 89  | 124 | 124 | 156 | 143 | 197 | 171 | 201 | 139 |
| 70  | 61  | 76  | 49  | 85  | 72  | 75  | 81  | 92  | 83  |
| 48  | 78  | 61  | 72  | 83  | 58  | 62  | 61  | 84  | 63  |
| 93  | 96  | 135 | 113 | 104 | 96  | 161 | 104 | 132 | 112 |
| 153 | 161 | 215 | 241 | 251 | 229 | 250 | 231 | 252 | 174 |
| 160 | 157 | 178 | 252 | 280 | 275 | 319 | 270 | 310 | 214 |
| 161 | 181 | 186 | 204 | 287 | 251 | 391 | 340 | 403 | 259 |
| 110 | 99  | 137 | 159 | 201 | 173 | 257 | 254 | 251 | 156 |
| 116 | 171 | 168 | 273 | 320 | 294 | 215 | 180 | 247 | 191 |
| 138 | 142 | 151 | 127 | 156 | 122 | 165 | 129 | 170 | 158 |
| 29  | 32  | 27  | 15  | 12  | 8   | 17  | 11  | 9   | 24  |
| 10  | 11  | 9   | 7   | 24  | 11  | 12  | 26  | 8   | 12  |

|     |     |     |     |     |     |     |     |     |     |
|-----|-----|-----|-----|-----|-----|-----|-----|-----|-----|
| 9   | 27  | 18  | 11  | 8   | 10  | 11  | 9   | 14  | 18  |
| 48  | 42  | 44  | 64  | 92  | 73  | 84  | 80  | 96  | 30  |
| 48  | 40  | 60  | 70  | 72  | 82  | 78  | 83  | 89  | 48  |
| 49  | 31  | 34  | 63  | 60  | 37  | 57  | 44  | 59  | 37  |
| 73  | 60  | 78  | 144 | 155 | 121 | 156 | 153 | 188 | 76  |
| 42  | 39  | 56  | 92  | 127 | 125 | 73  | 87  | 109 | 57  |
| 46  | 48  | 49  | 76  | 80  | 62  | 45  | 45  | 57  | 51  |
| 49  | 52  | 65  | 88  | 132 | 98  | 85  | 76  | 77  | 45  |
| 65  | 73  | 67  | 84  | 97  | 64  | 76  | 72  | 79  | 67  |
| 52  | 36  | 44  | 108 | 114 | 107 | 88  | 60  | 68  | 49  |
| 25  | 25  | 24  | 44  | 68  | 53  | 96  | 70  | 64  | 24  |
| 52  | 40  | 70  | 78  | 107 | 101 | 98  | 72  | 112 | 59  |
| 27  | 36  | 39  | 168 | 239 | 201 | 140 | 119 | 159 | 54  |
| 38  | 38  | 33  | 125 | 138 | 121 | 127 | 142 | 136 | 93  |
| 30  | 30  | 33  | 119 | 144 | 128 | 118 | 136 | 129 | 40  |
| 49  | 45  | 33  | 196 | 252 | 210 | 226 | 195 | 230 | 125 |
| 50  | 56  | 50  | 182 | 212 | 184 | 218 | 190 | 205 | 114 |
| 39  | 43  | 46  | 84  | 121 | 75  | 87  | 78  | 75  | 44  |
| 45  | 47  | 40  | 69  | 86  | 65  | 67  | 51  | 71  | 37  |
| 29  | 20  | 20  | 53  | 73  | 49  | 30  | 31  | 50  | 30  |
| 35  | 34  | 33  | 179 | 243 | 217 | 165 | 160 | 163 | 74  |
| 21  | 33  | 32  | 52  | 61  | 63  | 61  | 58  | 67  | 35  |
| 33  | 47  | 34  | 34  | 46  | 28  | 45  | 33  | 35  | 27  |
| 43  | 37  | 48  | 44  | 40  | 42  | 40  | 24  | 41  | 30  |
| 33  | 27  | 29  | 24  | 39  | 22  | 29  | 24  | 42  | 27  |
| 31  | 35  | 32  | 37  | 52  | 27  | 18  | 25  | 28  | 34  |
| 26  | 21  | 31  | 28  | 34  | 37  | 37  | 31  | 34  | 33  |
| 33  | 38  | 39  | 96  | 124 | 118 | 62  | 74  | 64  | 54  |
| 27  | 29  | 35  | 23  | 37  | 31  | 37  | 28  | 36  | 30  |
| 105 | 89  | 74  | 265 | 350 | 297 | 486 | 441 | 489 | 210 |
| 74  | 85  | 93  | 122 | 155 | 148 | 157 | 172 | 176 | 79  |
| 128 | 159 | 152 | 99  | 106 | 105 | 138 | 136 | 125 | 148 |
| 24  | 21  | 15  | 36  | 43  | 53  | 33  | 25  | 26  | 18  |
| 97  | 88  | 108 | 83  | 77  | 89  | 109 | 93  | 88  | 70  |
| 70  | 62  | 58  | 177 | 242 | 188 | 289 | 293 | 266 | 123 |
| 47  | 51  | 63  | 47  | 63  | 53  | 63  | 53  | 50  | 33  |
| 49  | 35  | 62  | 47  | 70  | 59  | 63  | 64  | 68  | 39  |
| 31  | 22  | 37  | 50  | 65  | 47  | 60  | 55  | 50  | 31  |
| 37  | 55  | 62  | 61  | 87  | 58  | 53  | 60  | 64  | 41  |
| 78  | 72  | 68  | 196 | 272 | 241 | 154 | 146 | 157 | 82  |
| 17  | 33  | 33  | 100 | 140 | 129 | 104 | 92  | 88  | 39  |

|     |     |     |     |     |     |     |     |     |     |
|-----|-----|-----|-----|-----|-----|-----|-----|-----|-----|
| 42  | 57  | 40  | 102 | 150 | 111 | 98  | 99  | 117 | 76  |
| 34  | 42  | 41  | 45  | 86  | 78  | 59  | 53  | 69  | 33  |
| 64  | 57  | 80  | 85  | 137 | 118 | 119 | 109 | 110 | 53  |
| 35  | 32  | 50  | 321 | 439 | 326 | 359 | 320 | 385 | 150 |
| 67  | 59  | 79  | 167 | 193 | 178 | 220 | 226 | 225 | 110 |
| 41  | 40  | 36  | 64  | 89  | 77  | 63  | 68  | 76  | 49  |
| 73  | 80  | 83  | 556 | 759 | 578 | 840 | 722 | 854 | 361 |
| 46  | 55  | 44  | 37  | 61  | 62  | 70  | 59  | 62  | 44  |
| 23  | 27  | 33  | 82  | 78  | 93  | 61  | 56  | 55  | 35  |
| 86  | 74  | 73  | 66  | 102 | 70  | 49  | 83  | 85  | 60  |
| 46  | 52  | 58  | 75  | 108 | 106 | 100 | 88  | 79  | 67  |
| 42  | 30  | 41  | 60  | 66  | 68  | 47  | 50  | 44  | 50  |
| 68  | 66  | 54  | 86  | 98  | 83  | 92  | 78  | 94  | 56  |
| 26  | 33  | 32  | 20  | 32  | 23  | 20  | 30  | 29  | 19  |
| 71  | 73  | 86  | 96  | 145 | 94  | 107 | 119 | 108 | 81  |
| 44  | 28  | 47  | 69  | 100 | 77  | 80  | 77  | 72  | 51  |
| 41  | 48  | 58  | 166 | 213 | 211 | 246 | 213 | 219 | 94  |
| 42  | 45  | 60  | 70  | 88  | 65  | 87  | 81  | 75  | 46  |
| 40  | 40  | 55  | 77  | 92  | 96  | 113 | 131 | 148 | 62  |
| 53  | 61  | 59  | 115 | 151 | 124 | 212 | 209 | 242 | 119 |
| 31  | 39  | 42  | 219 | 284 | 234 | 299 | 279 | 312 | 104 |
| 31  | 24  | 22  | 94  | 110 | 94  | 81  | 90  | 121 | 48  |
| 61  | 58  | 68  | 120 | 161 | 138 | 152 | 126 | 137 | 70  |
| 35  | 37  | 50  | 235 | 356 | 248 | 276 | 263 | 311 | 111 |
| 38  | 45  | 31  | 45  | 57  | 42  | 34  | 30  | 33  | 35  |
| 45  | 46  | 42  | 81  | 100 | 89  | 72  | 62  | 63  | 52  |
| 69  | 68  | 54  | 98  | 122 | 123 | 86  | 69  | 97  | 79  |
| 35  | 42  | 40  | 52  | 66  | 55  | 60  | 47  | 77  | 46  |
| 25  | 23  | 35  | 40  | 53  | 43  | 54  | 33  | 43  | 30  |
| 59  | 61  | 72  | 78  | 93  | 73  | 76  | 84  | 86  | 57  |
| 52  | 58  | 45  | 103 | 154 | 106 | 99  | 92  | 102 | 54  |
| 38  | 51  | 28  | 42  | 51  | 46  | 25  | 33  | 43  | 26  |
| 128 | 130 | 142 | 113 | 112 | 136 | 126 | 105 | 100 | 148 |
| 59  | 34  | 56  | 37  | 44  | 42  | 45  | 47  | 30  | 49  |
| 39  | 40  | 42  | 56  | 96  | 68  | 57  | 50  | 56  | 36  |
| 39  | 40  | 40  | 54  | 73  | 43  | 59  | 49  | 49  | 36  |
| 16  | 20  | 18  | 17  | 19  | 20  | 16  | 14  | 18  | 9   |
| 52  | 59  | 58  | 77  | 98  | 79  | 75  | 75  | 115 | 67  |
| 36  | 28  | 58  | 38  | 58  | 56  | 35  | 37  | 44  | 40  |
| 21  | 13  | 21  | 28  | 35  | 24  | 15  | 19  | 24  | 21  |
| 23  | 17  | 30  | 22  | 34  | 36  | 35  | 37  | 28  | 31  |

|     |    |     |     |     |     |     |     |     |     |
|-----|----|-----|-----|-----|-----|-----|-----|-----|-----|
| 39  | 42 | 36  | 70  | 83  | 65  | 66  | 50  | 54  | 37  |
| 30  | 37 | 28  | 28  | 32  | 27  | 36  | 32  | 37  | 32  |
| 24  | 21 | 27  | 29  | 27  | 17  | 19  | 23  | 14  | 19  |
| 21  | 17 | 27  | 17  | 17  | 20  | 25  | 23  | 22  | 22  |
| 68  | 65 | 53  | 47  | 53  | 51  | 61  | 46  | 43  | 49  |
| 23  | 22 | 24  | 55  | 70  | 55  | 52  | 48  | 37  | 36  |
| 44  | 52 | 37  | 63  | 70  | 74  | 53  | 47  | 61  | 42  |
| 39  | 55 | 56  | 47  | 73  | 43  | 43  | 34  | 35  | 47  |
| 46  | 32 | 52  | 73  | 97  | 103 | 92  | 121 | 91  | 67  |
| 29  | 22 | 31  | 40  | 41  | 50  | 37  | 42  | 33  | 25  |
| 27  | 34 | 38  | 72  | 91  | 78  | 73  | 65  | 79  | 52  |
| 41  | 42 | 41  | 65  | 58  | 59  | 94  | 52  | 62  | 34  |
| 66  | 63 | 61  | 143 | 186 | 144 | 157 | 132 | 165 | 64  |
| 50  | 52 | 35  | 48  | 57  | 62  | 49  | 38  | 62  | 42  |
| 48  | 49 | 64  | 130 | 149 | 139 | 165 | 142 | 158 | 92  |
| 54  | 58 | 68  | 107 | 137 | 110 | 141 | 112 | 114 | 76  |
| 42  | 45 | 69  | 74  | 93  | 64  | 86  | 83  | 106 | 58  |
| 60  | 62 | 67  | 90  | 127 | 108 | 92  | 100 | 90  | 59  |
| 36  | 38 | 50  | 121 | 166 | 134 | 111 | 122 | 108 | 76  |
| 18  | 29 | 27  | 64  | 73  | 76  | 83  | 80  | 102 | 47  |
| 19  | 22 | 32  | 66  | 82  | 56  | 57  | 53  | 53  | 41  |
| 56  | 46 | 68  | 180 | 253 | 254 | 202 | 172 | 223 | 98  |
| 112 | 93 | 110 | 338 | 470 | 346 | 289 | 252 | 285 | 137 |
| 64  | 65 | 63  | 192 | 221 | 181 | 176 | 176 | 180 | 80  |
| 22  | 35 | 31  | 156 | 179 | 132 | 72  | 56  | 69  | 32  |
| 44  | 36 | 56  | 143 | 163 | 138 | 149 | 115 | 154 | 63  |
| 38  | 35 | 31  | 94  | 127 | 81  | 89  | 85  | 92  | 42  |
| 61  | 54 | 69  | 248 | 350 | 310 | 337 | 333 | 348 | 151 |
| 10  | 19 | 20  | 80  | 106 | 68  | 94  | 80  | 74  | 35  |
| 28  | 29 | 23  | 44  | 43  | 27  | 26  | 22  | 28  | 19  |
| 32  | 32 | 31  | 54  | 53  | 54  | 57  | 46  | 69  | 29  |
| 27  | 33 | 36  | 40  | 59  | 57  | 72  | 69  | 68  | 44  |
| 58  | 46 | 51  | 96  | 106 | 105 | 128 | 92  | 102 | 67  |
| 25  | 38 | 29  | 52  | 62  | 47  | 45  | 51  | 58  | 36  |
| 40  | 24 | 43  | 68  | 76  | 60  | 77  | 64  | 83  | 40  |
| 68  | 64 | 59  | 258 | 307 | 256 | 95  | 95  | 116 | 78  |
| 28  | 34 | 52  | 78  | 95  | 79  | 77  | 58  | 73  | 50  |
| 61  | 52 | 48  | 92  | 111 | 89  | 100 | 115 | 98  | 59  |
| 8   | 15 | 18  | 14  | 14  | 10  | 16  | 8   | 12  | 12  |
| 32  | 36 | 29  | 45  | 57  | 44  | 53  | 45  | 51  | 43  |
| 96  | 87 | 111 | 121 | 118 | 92  | 110 | 83  | 111 | 63  |



|     |     |     |     |     |     |     |     |     |     |
|-----|-----|-----|-----|-----|-----|-----|-----|-----|-----|
| 50  | 39  | 63  | 40  | 40  | 39  | 37  | 32  | 47  | 24  |
| 82  | 90  | 99  | 82  | 89  | 85  | 67  | 59  | 74  | 49  |
| 36  | 42  | 38  | 82  | 81  | 69  | 53  | 80  | 73  | 41  |
| 46  | 61  | 69  | 103 | 203 | 153 | 111 | 87  | 86  | 65  |
| 18  | 14  | 16  | 22  | 27  | 32  | 33  | 32  | 27  | 12  |
| 38  | 63  | 56  | 74  | 101 | 83  | 62  | 52  | 68  | 37  |
| 62  | 62  | 54  | 78  | 94  | 80  | 120 | 115 | 114 | 66  |
| 49  | 40  | 45  | 175 | 213 | 184 | 160 | 168 | 183 | 75  |
| 52  | 81  | 78  | 111 | 165 | 134 | 129 | 124 | 116 | 80  |
| 19  | 46  | 45  | 43  | 71  | 64  | 50  | 42  | 44  | 39  |
| 18  | 17  | 22  | 19  | 28  | 8   | 26  | 24  | 28  | 23  |
| 16  | 10  | 26  | 14  | 19  | 19  | 24  | 28  | 15  | 11  |
| 38  | 23  | 47  | 77  | 83  | 65  | 76  | 58  | 85  | 40  |
| 38  | 44  | 33  | 26  | 36  | 34  | 48  | 50  | 53  | 36  |
| 29  | 22  | 20  | 72  | 110 | 79  | 64  | 45  | 61  | 29  |
| 20  | 16  | 13  | 63  | 103 | 51  | 47  | 47  | 35  | 23  |
| 29  | 25  | 37  | 157 | 223 | 174 | 124 | 100 | 109 | 48  |
| 82  | 75  | 75  | 102 | 116 | 96  | 78  | 93  | 95  | 71  |
| 29  | 19  | 29  | 52  | 59  | 57  | 71  | 67  | 71  | 40  |
| 53  | 57  | 65  | 84  | 115 | 108 | 95  | 75  | 99  | 57  |
| 31  | 35  | 37  | 67  | 77  | 77  | 51  | 40  | 54  | 44  |
| 52  | 55  | 55  | 74  | 94  | 86  | 78  | 68  | 69  | 58  |
| 31  | 38  | 49  | 55  | 84  | 57  | 81  | 56  | 58  | 49  |
| 23  | 29  | 26  | 34  | 42  | 30  | 39  | 20  | 44  | 27  |
| 10  | 11  | 7   | 5   | 14  | 13  | 12  | 3   | 9   | 9   |
| 10  | 9   | 10  | 6   | 5   | 4   | 4   | 2   | 8   | 5   |
| 58  | 49  | 66  | 59  | 69  | 67  | 66  | 52  | 57  | 40  |
| 69  | 74  | 81  | 136 | 153 | 136 | 221 | 239 | 223 | 103 |
| 28  | 45  | 47  | 144 | 198 | 190 | 251 | 228 | 231 | 101 |
| 117 | 123 | 148 | 151 | 145 | 154 | 352 | 372 | 381 | 203 |
| 68  | 87  | 74  | 120 | 182 | 173 | 231 | 234 | 225 | 121 |
| 87  | 91  | 79  | 132 | 141 | 126 | 208 | 186 | 260 | 117 |
| 93  | 75  | 76  | 158 | 240 | 183 | 233 | 221 | 245 | 121 |
| 82  | 81  | 84  | 143 | 170 | 147 | 219 | 184 | 200 | 120 |
| 32  | 49  | 38  | 72  | 86  | 91  | 81  | 61  | 87  | 60  |
| 57  | 61  | 56  | 93  | 129 | 100 | 117 | 120 | 118 | 62  |
| 57  | 59  | 53  | 159 | 195 | 179 | 224 | 202 | 227 | 96  |
| 51  | 60  | 58  | 171 | 228 | 180 | 239 | 221 | 278 | 113 |
| 8   | 18  | 12  | 22  | 32  | 22  | 35  | 37  | 49  | 24  |
| 51  | 45  | 55  | 115 | 153 | 109 | 84  | 51  | 94  | 41  |
| 62  | 35  | 46  | 55  | 76  | 62  | 72  | 50  | 71  | 53  |

|     |     |     |     |     |     |     |     |     |     |
|-----|-----|-----|-----|-----|-----|-----|-----|-----|-----|
| 75  | 67  | 86  | 45  | 59  | 44  | 75  | 87  | 83  | 66  |
| 65  | 59  | 78  | 104 | 160 | 144 | 140 | 130 | 147 | 76  |
| 23  | 17  | 24  | 29  | 37  | 30  | 9   | 12  | 13  | 17  |
| 45  | 35  | 37  | 47  | 57  | 38  | 25  | 32  | 25  | 19  |
| 84  | 83  | 88  | 111 | 147 | 134 | 273 | 209 | 237 | 112 |
| 80  | 86  | 76  | 81  | 99  | 82  | 126 | 154 | 175 | 81  |
| 79  | 102 | 98  | 157 | 205 | 180 | 260 | 247 | 284 | 133 |
| 84  | 102 | 95  | 163 | 225 | 217 | 314 | 283 | 344 | 150 |
| 86  | 75  | 110 | 99  | 171 | 151 | 172 | 162 | 183 | 105 |
| 106 | 106 | 146 | 160 | 190 | 190 | 255 | 240 | 311 | 158 |
| 81  | 86  | 104 | 137 | 194 | 174 | 179 | 186 | 193 | 123 |
| 95  | 83  | 105 | 104 | 133 | 114 | 190 | 206 | 226 | 119 |
| 152 | 159 | 152 | 179 | 282 | 254 | 375 | 385 | 428 | 198 |
| 24  | 33  | 27  | 24  | 29  | 26  | 25  | 19  | 18  | 26  |
| 62  | 64  | 75  | 73  | 87  | 76  | 86  | 70  | 82  | 54  |
| 32  | 47  | 46  | 56  | 87  | 55  | 77  | 65  | 78  | 41  |
| 63  | 48  | 79  | 43  | 78  | 66  | 105 | 101 | 108 | 66  |
| 20  | 10  | 12  | 21  | 24  | 16  | 26  | 21  | 25  | 15  |
| 60  | 57  | 71  | 137 | 156 | 156 | 251 | 240 | 248 | 79  |
| 19  | 23  | 18  | 20  | 42  | 24  | 34  | 26  | 42  | 24  |
| 21  | 22  | 20  | 20  | 30  | 16  | 22  | 23  | 30  | 15  |
| 37  | 39  | 32  | 34  | 32  | 49  | 38  | 49  | 41  | 36  |
| 56  | 41  | 52  | 238 | 334 | 235 | 192 | 152 | 159 | 86  |
| 30  | 47  | 45  | 102 | 110 | 106 | 96  | 83  | 102 | 45  |
| 34  | 38  | 56  | 82  | 106 | 88  | 122 | 109 | 99  | 55  |
| 38  | 44  | 39  | 89  | 94  | 84  | 107 | 95  | 104 | 55  |
| 35  | 22  | 36  | 155 | 216 | 177 | 176 | 122 | 159 | 88  |
| 55  | 64  | 64  | 315 | 405 | 331 | 332 | 303 | 297 | 146 |
| 29  | 39  | 36  | 111 | 139 | 116 | 73  | 58  | 80  | 30  |
| 60  | 64  | 61  | 461 | 572 | 457 | 598 | 512 | 580 | 247 |
| 103 | 100 | 104 | 140 | 191 | 191 | 196 | 190 | 190 | 115 |
| 113 | 99  | 104 | 183 | 230 | 167 | 245 | 207 | 199 | 140 |
| 43  | 50  | 40  | 20  | 33  | 38  | 33  | 23  | 40  | 40  |
| 42  | 31  | 53  | 48  | 59  | 56  | 43  | 47  | 55  | 34  |
| 30  | 34  | 37  | 21  | 37  | 21  | 19  | 36  | 42  | 20  |
| 46  | 51  | 48  | 42  | 50  | 42  | 46  | 50  | 51  | 47  |
| 33  | 35  | 57  | 49  | 90  | 79  | 76  | 55  | 64  | 32  |
| 32  | 37  | 43  | 60  | 99  | 74  | 129 | 100 | 102 | 61  |
| 32  | 25  | 28  | 45  | 50  | 38  | 31  | 32  | 31  | 22  |
| 32  | 46  | 41  | 94  | 120 | 79  | 89  | 74  | 73  | 52  |
| 50  | 50  | 51  | 122 | 152 | 117 | 114 | 96  | 96  | 61  |

|    |    |    |     |     |     |     |     |     |     |
|----|----|----|-----|-----|-----|-----|-----|-----|-----|
| 44 | 27 | 28 | 67  | 60  | 63  | 48  | 54  | 51  | 38  |
| 72 | 65 | 66 | 129 | 140 | 144 | 206 | 151 | 159 | 78  |
| 53 | 49 | 42 | 57  | 69  | 52  | 76  | 68  | 73  | 44  |
| 31 | 34 | 53 | 59  | 86  | 63  | 88  | 95  | 95  | 50  |
| 45 | 38 | 47 | 65  | 90  | 73  | 99  | 71  | 79  | 61  |
| 83 | 54 | 64 | 80  | 114 | 115 | 159 | 142 | 159 | 79  |
| 49 | 43 | 60 | 85  | 95  | 92  | 125 | 121 | 102 | 60  |
| 22 | 33 | 31 | 50  | 64  | 69  | 56  | 45  | 69  | 36  |
| 48 | 52 | 60 | 52  | 83  | 79  | 85  | 70  | 69  | 51  |
| 70 | 69 | 86 | 173 | 250 | 194 | 260 | 214 | 226 | 128 |
| 53 | 56 | 62 | 191 | 289 | 247 | 290 | 238 | 291 | 144 |
| 48 | 46 | 37 | 62  | 80  | 48  | 45  | 51  | 54  | 39  |
| 17 | 12 | 16 | 13  | 30  | 21  | 20  | 16  | 25  | 17  |
| 38 | 38 | 33 | 122 | 142 | 115 | 131 | 97  | 115 | 52  |
| 60 | 57 | 70 | 413 | 542 | 426 | 389 | 341 | 413 | 176 |
| 46 | 42 | 50 | 138 | 164 | 153 | 120 | 104 | 122 | 49  |
| 22 | 15 | 18 | 139 | 158 | 133 | 112 | 112 | 124 | 38  |
| 70 | 77 | 84 | 198 | 271 | 259 | 281 | 249 | 272 | 114 |
| 25 | 23 | 23 | 73  | 90  | 104 | 107 | 100 | 95  | 52  |
| 63 | 76 | 77 | 106 | 123 | 114 | 196 | 215 | 218 | 108 |
| 46 | 40 | 47 | 78  | 103 | 93  | 82  | 83  | 95  | 48  |
| 47 | 65 | 66 | 52  | 48  | 52  | 58  | 60  | 64  | 47  |
| 64 | 51 | 51 | 74  | 82  | 62  | 55  | 66  | 69  | 57  |
| 78 | 96 | 73 | 92  | 109 | 89  | 112 | 104 | 115 | 91  |
| 64 | 62 | 53 | 56  | 64  | 63  | 50  | 45  | 54  | 36  |
| 32 | 30 | 31 | 28  | 27  | 30  | 17  | 18  | 29  | 20  |
| 20 | 20 | 16 | 17  | 24  | 17  | 20  | 14  | 9   | 12  |
| 55 | 47 | 60 | 58  | 70  | 56  | 53  | 47  | 59  | 52  |
| 63 | 66 | 74 | 43  | 76  | 45  | 43  | 58  | 56  | 57  |
| 48 | 44 | 55 | 56  | 72  | 69  | 89  | 73  | 95  | 60  |
| 33 | 39 | 40 | 46  | 47  | 30  | 57  | 54  | 68  | 36  |
| 58 | 54 | 56 | 65  | 87  | 57  | 59  | 52  | 59  | 54  |
| 64 | 62 | 69 | 74  | 88  | 72  | 85  | 65  | 91  | 42  |
| 71 | 66 | 77 | 113 | 140 | 108 | 166 | 140 | 202 | 89  |
| 83 | 74 | 77 | 49  | 73  | 56  | 58  | 46  | 62  | 40  |
| 59 | 46 | 54 | 53  | 50  | 48  | 57  | 52  | 39  | 62  |
| 51 | 63 | 66 | 84  | 97  | 92  | 80  | 73  | 70  | 68  |
| 67 | 62 | 76 | 91  | 145 | 118 | 108 | 104 | 114 | 77  |
| 57 | 36 | 43 | 32  | 44  | 33  | 33  | 33  | 32  | 33  |
| 21 | 20 | 22 | 22  | 25  | 27  | 16  | 13  | 13  | 27  |
| 72 | 71 | 67 | 57  | 82  | 63  | 82  | 62  | 64  | 60  |

|     |    |     |     |     |     |     |     |     |     |
|-----|----|-----|-----|-----|-----|-----|-----|-----|-----|
| 84  | 76 | 87  | 100 | 129 | 109 | 316 | 296 | 292 | 143 |
| 34  | 45 | 46  | 95  | 116 | 97  | 124 | 117 | 112 | 60  |
| 89  | 95 | 97  | 84  | 112 | 102 | 137 | 154 | 142 | 80  |
| 32  | 32 | 31  | 21  | 25  | 21  | 57  | 55  | 50  | 29  |
| 36  | 28 | 32  | 89  | 146 | 106 | 119 | 100 | 83  | 45  |
| 31  | 40 | 43  | 44  | 54  | 32  | 59  | 52  | 52  | 37  |
| 76  | 66 | 81  | 90  | 109 | 107 | 121 | 105 | 94  | 69  |
| 52  | 44 | 63  | 51  | 65  | 54  | 75  | 66  | 75  | 62  |
| 30  | 28 | 26  | 68  | 80  | 86  | 91  | 75  | 96  | 41  |
| 72  | 85 | 105 | 90  | 97  | 105 | 128 | 89  | 112 | 65  |
| 70  | 75 | 91  | 127 | 165 | 128 | 138 | 131 | 124 | 84  |
| 44  | 39 | 45  | 40  | 31  | 46  | 58  | 27  | 46  | 39  |
| 101 | 82 | 98  | 82  | 84  | 85  | 108 | 93  | 83  | 73  |
| 36  | 37 | 31  | 22  | 23  | 23  | 27  | 34  | 22  | 32  |
| 27  | 39 | 35  | 115 | 157 | 137 | 135 | 120 | 129 | 68  |
| 53  | 63 | 81  | 124 | 125 | 113 | 110 | 127 | 136 | 74  |
| 59  | 76 | 77  | 59  | 66  | 42  | 64  | 62  | 50  | 57  |
| 89  | 93 | 97  | 92  | 99  | 94  | 101 | 78  | 111 | 88  |
| 40  | 41 | 49  | 37  | 65  | 56  | 55  | 28  | 45  | 45  |
| 75  | 73 | 69  | 78  | 82  | 94  | 77  | 75  | 93  | 74  |
| 49  | 62 | 60  | 55  | 65  | 75  | 85  | 55  | 63  | 55  |
| 7   | 19 | 20  | 14  | 9   | 13  | 24  | 22  | 28  | 14  |
| 46  | 48 | 49  | 52  | 58  | 56  | 42  | 45  | 69  | 35  |
| 29  | 33 | 28  | 30  | 32  | 39  | 34  | 19  | 36  | 25  |
| 22  | 28 | 17  | 14  | 16  | 15  | 13  | 14  | 17  | 20  |
| 98  | 96 | 118 | 129 | 172 | 174 | 181 | 141 | 169 | 117 |
| 35  | 57 | 37  | 34  | 41  | 36  | 46  | 39  | 52  | 35  |
| 40  | 54 | 36  | 36  | 57  | 37  | 39  | 53  | 37  | 28  |
| 79  | 87 | 73  | 89  | 104 | 100 | 95  | 87  | 95  | 88  |
| 20  | 22 | 22  | 17  | 32  | 23  | 35  | 31  | 37  | 28  |
| 76  | 81 | 73  | 140 | 169 | 136 | 157 | 155 | 157 | 94  |
| 43  | 38 | 50  | 101 | 114 | 98  | 110 | 103 | 129 | 69  |
| 44  | 49 | 49  | 133 | 149 | 137 | 108 | 92  | 120 | 52  |
| 46  | 58 | 53  | 95  | 122 | 108 | 112 | 104 | 103 | 68  |
| 36  | 48 | 42  | 92  | 106 | 104 | 73  | 79  | 77  | 44  |
| 26  | 30 | 34  | 113 | 117 | 100 | 85  | 75  | 80  | 41  |
| 23  | 24 | 12  | 36  | 38  | 36  | 23  | 25  | 27  | 15  |
| 19  | 20 | 23  | 50  | 61  | 47  | 49  | 46  | 41  | 18  |
| 77  | 53 | 78  | 345 | 432 | 344 | 519 | 498 | 536 | 248 |
| 68  | 69 | 60  | 119 | 119 | 109 | 130 | 137 | 139 | 72  |
| 38  | 39 | 33  | 33  | 52  | 33  | 36  | 31  | 39  | 21  |

|     |     |     |     |     |     |     |     |     |     |
|-----|-----|-----|-----|-----|-----|-----|-----|-----|-----|
| 35  | 35  | 45  | 48  | 46  | 46  | 51  | 44  | 41  | 31  |
| 62  | 50  | 66  | 101 | 150 | 128 | 68  | 63  | 71  | 46  |
| 47  | 45  | 46  | 30  | 41  | 34  | 19  | 17  | 18  | 35  |
| 41  | 39  | 56  | 70  | 69  | 60  | 90  | 67  | 85  | 45  |
| 84  | 80  | 86  | 66  | 78  | 66  | 85  | 70  | 78  | 63  |
| 67  | 62  | 53  | 65  | 80  | 66  | 69  | 53  | 78  | 51  |
| 134 | 177 | 178 | 109 | 124 | 119 | 202 | 192 | 176 | 165 |
| 34  | 39  | 30  | 28  | 41  | 29  | 14  | 24  | 16  | 40  |
| 32  | 29  | 31  | 56  | 41  | 42  | 60  | 74  | 60  | 40  |
| 65  | 61  | 66  | 54  | 55  | 53  | 78  | 44  | 76  | 42  |
| 32  | 43  | 44  | 34  | 62  | 44  | 46  | 40  | 55  | 29  |
| 19  | 18  | 29  | 34  | 37  | 29  | 39  | 33  | 24  | 17  |
| 26  | 46  | 34  | 36  | 40  | 39  | 36  | 25  | 22  | 26  |
| 36  | 41  | 46  | 56  | 61  | 83  | 72  | 62  | 57  | 48  |
| 44  | 39  | 64  | 74  | 76  | 64  | 65  | 54  | 62  | 50  |
| 28  | 27  | 31  | 12  | 17  | 16  | 15  | 12  | 16  | 12  |
| 93  | 108 | 84  | 98  | 115 | 108 | 98  | 117 | 93  | 72  |
| 36  | 43  | 34  | 73  | 92  | 69  | 61  | 60  | 61  | 40  |
| 37  | 35  | 48  | 60  | 77  | 59  | 35  | 35  | 43  | 41  |
| 46  | 41  | 53  | 71  | 87  | 83  | 39  | 37  | 46  | 28  |
| 30  | 29  | 35  | 29  | 28  | 14  | 12  | 14  | 13  | 26  |
| 15  | 24  | 29  | 22  | 20  | 22  | 12  | 17  | 9   | 12  |
| 35  | 19  | 43  | 46  | 53  | 54  | 29  | 21  | 28  | 20  |
| 13  | 18  | 24  | 10  | 17  | 22  | 10  | 11  | 11  | 11  |
| 46  | 43  | 37  | 62  | 68  | 44  | 65  | 57  | 59  | 36  |
| 51  | 64  | 50  | 113 | 165 | 110 | 98  | 112 | 129 | 78  |
| 54  | 53  | 56  | 157 | 217 | 166 | 146 | 132 | 161 | 74  |
| 10  | 10  | 9   | 12  | 23  | 10  | 12  | 12  | 13  | 10  |
| 43  | 48  | 35  | 44  | 51  | 49  | 69  | 44  | 65  | 46  |
| 39  | 46  | 39  | 51  | 61  | 58  | 68  | 52  | 55  | 51  |
| 47  | 50  | 45  | 82  | 120 | 101 | 112 | 107 | 109 | 64  |
| 20  | 21  | 22  | 46  | 47  | 33  | 25  | 37  | 45  | 22  |
| 63  | 62  | 53  | 67  | 90  | 107 | 78  | 47  | 84  | 57  |
| 69  | 70  | 67  | 131 | 146 | 106 | 107 | 122 | 108 | 59  |
| 59  | 63  | 60  | 45  | 61  | 55  | 48  | 45  | 59  | 34  |
| 45  | 54  | 45  | 49  | 85  | 71  | 66  | 38  | 61  | 41  |
| 40  | 55  | 61  | 66  | 73  | 42  | 50  | 50  | 58  | 34  |
| 55  | 43  | 54  | 52  | 97  | 81  | 69  | 67  | 74  | 51  |
| 42  | 52  | 52  | 61  | 81  | 75  | 112 | 103 | 116 | 55  |
| 58  | 57  | 44  | 135 | 151 | 122 | 142 | 108 | 125 | 71  |
| 14  | 16  | 17  | 8   | 11  | 3   | 8   | 10  | 12  | 6   |

|     |    |     |     |     |     |     |     |     |     |
|-----|----|-----|-----|-----|-----|-----|-----|-----|-----|
| 6   | 4  | 4   | 4   | 10  | 3   | 10  | 5   | 3   | 5   |
| 30  | 34 | 49  | 26  | 38  | 42  | 24  | 27  | 32  | 33  |
| 35  | 38 | 41  | 43  | 33  | 44  | 49  | 51  | 31  | 29  |
| 31  | 45 | 43  | 36  | 61  | 45  | 49  | 47  | 59  | 31  |
| 65  | 79 | 64  | 64  | 82  | 84  | 88  | 92  | 67  | 50  |
| 26  | 29 | 25  | 22  | 25  | 28  | 17  | 12  | 12  | 24  |
| 19  | 23 | 26  | 16  | 15  | 19  | 17  | 10  | 19  | 17  |
| 12  | 10 | 15  | 7   | 6   | 12  | 9   | 13  | 8   | 10  |
| 62  | 37 | 51  | 112 | 131 | 118 | 98  | 88  | 82  | 50  |
| 61  | 43 | 70  | 121 | 165 | 181 | 89  | 109 | 118 | 65  |
| 61  | 54 | 64  | 149 | 136 | 168 | 92  | 106 | 89  | 72  |
| 65  | 61 | 86  | 133 | 149 | 161 | 135 | 95  | 121 | 86  |
| 20  | 25 | 29  | 116 | 141 | 90  | 81  | 62  | 67  | 43  |
| 48  | 32 | 49  | 67  | 68  | 68  | 67  | 54  | 57  | 47  |
| 62  | 56 | 47  | 71  | 92  | 63  | 64  | 63  | 71  | 59  |
| 17  | 17 | 14  | 9   | 24  | 10  | 27  | 17  | 22  | 10  |
| 63  | 71 | 68  | 72  | 115 | 108 | 75  | 70  | 57  | 65  |
| 74  | 89 | 75  | 125 | 195 | 144 | 145 | 133 | 118 | 92  |
| 60  | 41 | 71  | 150 | 170 | 142 | 119 | 125 | 133 | 81  |
| 28  | 31 | 26  | 30  | 40  | 34  | 45  | 28  | 34  | 25  |
| 25  | 20 | 25  | 23  | 36  | 15  | 27  | 16  | 21  | 21  |
| 17  | 17 | 23  | 25  | 29  | 20  | 13  | 19  | 22  | 16  |
| 23  | 24 | 35  | 33  | 41  | 29  | 34  | 26  | 16  | 22  |
| 25  | 31 | 32  | 19  | 24  | 31  | 25  | 19  | 31  | 35  |
| 55  | 67 | 64  | 113 | 132 | 120 | 111 | 118 | 127 | 76  |
| 47  | 34 | 34  | 31  | 53  | 39  | 43  | 34  | 38  | 30  |
| 37  | 29 | 47  | 45  | 67  | 60  | 68  | 49  | 48  | 43  |
| 35  | 48 | 50  | 39  | 43  | 47  | 52  | 49  | 62  | 48  |
| 54  | 40 | 59  | 77  | 81  | 62  | 69  | 60  | 56  | 52  |
| 55  | 56 | 46  | 26  | 26  | 20  | 31  | 35  | 33  | 42  |
| 14  | 11 | 8   | 10  | 21  | 17  | 11  | 7   | 22  | 19  |
| 56  | 31 | 44  | 39  | 55  | 53  | 48  | 47  | 43  | 43  |
| 57  | 70 | 62  | 183 | 224 | 226 | 260 | 244 | 255 | 119 |
| 53  | 58 | 65  | 146 | 195 | 168 | 141 | 141 | 140 | 80  |
| 27  | 30 | 28  | 41  | 42  | 31  | 47  | 39  | 36  | 24  |
| 13  | 17 | 18  | 39  | 38  | 53  | 43  | 37  | 59  | 22  |
| 76  | 83 | 69  | 90  | 128 | 111 | 169 | 135 | 141 | 90  |
| 48  | 42 | 44  | 77  | 79  | 86  | 159 | 144 | 137 | 74  |
| 101 | 95 | 129 | 83  | 106 | 91  | 133 | 93  | 124 | 85  |
| 26  | 41 | 33  | 33  | 57  | 50  | 65  | 69  | 65  | 54  |
| 98  | 77 | 115 | 229 | 292 | 254 | 282 | 274 | 301 | 161 |

|     |     |     |     |     |     |     |     |     |     |
|-----|-----|-----|-----|-----|-----|-----|-----|-----|-----|
| 29  | 32  | 31  | 46  | 50  | 46  | 65  | 50  | 42  | 34  |
| 43  | 29  | 38  | 76  | 100 | 98  | 83  | 63  | 64  | 37  |
| 55  | 84  | 70  | 105 | 138 | 129 | 81  | 84  | 94  | 45  |
| 51  | 61  | 51  | 58  | 94  | 76  | 56  | 65  | 73  | 45  |
| 51  | 41  | 53  | 168 | 225 | 184 | 200 | 193 | 216 | 107 |
| 49  | 51  | 35  | 74  | 68  | 53  | 101 | 78  | 83  | 55  |
| 66  | 57  | 73  | 182 | 237 | 210 | 179 | 171 | 211 | 82  |
| 33  | 37  | 35  | 69  | 114 | 92  | 120 | 108 | 133 | 61  |
| 198 | 215 | 206 | 247 | 291 | 267 | 358 | 341 | 359 | 226 |
| 47  | 55  | 38  | 108 | 136 | 92  | 127 | 100 | 117 | 59  |
| 30  | 27  | 24  | 70  | 88  | 67  | 71  | 64  | 70  | 45  |
| 42  | 56  | 31  | 172 | 272 | 205 | 221 | 152 | 207 | 84  |
| 40  | 49  | 56  | 176 | 254 | 184 | 158 | 136 | 192 | 73  |
| 45  | 41  | 58  | 270 | 347 | 315 | 558 | 426 | 555 | 265 |
| 40  | 37  | 34  | 125 | 156 | 144 | 154 | 132 | 151 | 68  |
| 59  | 54  | 69  | 226 | 315 | 271 | 262 | 208 | 240 | 108 |
| 32  | 25  | 21  | 72  | 65  | 65  | 72  | 65  | 70  | 37  |
| 28  | 29  | 50  | 172 | 214 | 176 | 157 | 158 | 161 | 76  |
| 24  | 27  | 31  | 79  | 105 | 72  | 113 | 106 | 123 | 49  |
| 38  | 29  | 34  | 141 | 169 | 122 | 144 | 134 | 150 | 68  |
| 47  | 50  | 63  | 195 | 259 | 218 | 207 | 159 | 212 | 95  |
| 93  | 97  | 87  | 266 | 318 | 301 | 304 | 232 | 290 | 137 |
| 58  | 55  | 50  | 99  | 130 | 106 | 122 | 115 | 128 | 72  |
| 61  | 66  | 74  | 199 | 286 | 223 | 359 | 285 | 311 | 142 |
| 28  | 37  | 50  | 93  | 87  | 92  | 71  | 72  | 86  | 50  |
| 61  | 71  | 65  | 83  | 117 | 92  | 82  | 79  | 91  | 74  |
| 21  | 18  | 27  | 66  | 85  | 72  | 70  | 63  | 65  | 33  |
| 46  | 61  | 64  | 119 | 175 | 131 | 151 | 145 | 171 | 77  |
| 63  | 51  | 71  | 194 | 202 | 194 | 163 | 149 | 172 | 100 |
| 67  | 82  | 87  | 163 | 150 | 156 | 151 | 137 | 154 | 97  |
| 79  | 98  | 75  | 262 | 295 | 324 | 258 | 276 | 277 | 163 |
| 61  | 55  | 65  | 145 | 155 | 145 | 150 | 141 | 125 | 74  |
| 27  | 38  | 23  | 43  | 86  | 84  | 66  | 57  | 62  | 31  |
| 60  | 46  | 51  | 94  | 106 | 95  | 96  | 79  | 105 | 63  |
| 37  | 36  | 42  | 40  | 69  | 45  | 42  | 28  | 47  | 29  |
| 32  | 45  | 43  | 38  | 62  | 57  | 36  | 22  | 29  | 46  |
| 46  | 44  | 48  | 50  | 70  | 67  | 56  | 32  | 66  | 48  |
| 18  | 17  | 23  | 15  | 26  | 17  | 19  | 15  | 15  | 16  |
| 28  | 67  | 55  | 77  | 114 | 102 | 96  | 107 | 133 | 63  |
| 41  | 35  | 40  | 28  | 37  | 27  | 42  | 37  | 30  | 25  |
| 40  | 45  | 38  | 32  | 39  | 26  | 30  | 34  | 41  | 26  |

|     |     |     |     |     |     |     |     |     |     |
|-----|-----|-----|-----|-----|-----|-----|-----|-----|-----|
| 46  | 36  | 49  | 56  | 68  | 52  | 39  | 41  | 49  | 40  |
| 35  | 35  | 32  | 98  | 117 | 112 | 71  | 65  | 76  | 50  |
| 17  | 27  | 22  | 23  | 29  | 23  | 32  | 39  | 33  | 26  |
| 45  | 56  | 57  | 68  | 86  | 65  | 89  | 79  | 68  | 58  |
| 80  | 97  | 76  | 145 | 220 | 190 | 155 | 169 | 177 | 116 |
| 62  | 91  | 75  | 93  | 128 | 100 | 127 | 144 | 107 | 56  |
| 55  | 54  | 70  | 205 | 235 | 205 | 164 | 173 | 170 | 100 |
| 89  | 77  | 106 | 104 | 126 | 111 | 143 | 123 | 138 | 86  |
| 39  | 28  | 34  | 31  | 39  | 26  | 29  | 28  | 20  | 34  |
| 49  | 52  | 44  | 49  | 40  | 57  | 53  | 43  | 55  | 39  |
| 41  | 46  | 56  | 65  | 73  | 64  | 44  | 42  | 41  | 29  |
| 51  | 53  | 62  | 86  | 134 | 99  | 97  | 96  | 108 | 70  |
| 6   | 5   | 5   | 5   | 5   | 8   | 7   | 10  | 10  | 4   |
| 24  | 42  | 37  | 52  | 73  | 52  | 66  | 78  | 83  | 52  |
| 27  | 34  | 32  | 70  | 81  | 71  | 69  | 66  | 71  | 44  |
| 51  | 58  | 57  | 75  | 98  | 82  | 79  | 103 | 97  | 53  |
| 30  | 30  | 30  | 35  | 38  | 40  | 37  | 37  | 40  | 29  |
| 35  | 44  | 42  | 64  | 63  | 61  | 65  | 68  | 76  | 45  |
| 43  | 48  | 40  | 77  | 99  | 75  | 84  | 87  | 97  | 53  |
| 7   | 12  | 18  | 26  | 39  | 34  | 26  | 13  | 8   | 3   |
| 31  | 25  | 29  | 69  | 88  | 71  | 126 | 136 | 119 | 58  |
| 24  | 34  | 33  | 50  | 57  | 44  | 52  | 42  | 42  | 32  |
| 15  | 17  | 15  | 35  | 34  | 22  | 33  | 21  | 24  | 10  |
| 37  | 45  | 45  | 48  | 82  | 71  | 56  | 58  | 55  | 41  |
| 117 | 113 | 132 | 62  | 79  | 65  | 108 | 104 | 129 | 112 |
| 58  | 51  | 55  | 59  | 65  | 55  | 54  | 47  | 65  | 56  |
| 144 | 143 | 171 | 81  | 82  | 62  | 110 | 98  | 96  | 124 |
| 136 | 120 | 152 | 138 | 185 | 135 | 268 | 250 | 260 | 161 |
| 74  | 76  | 89  | 53  | 80  | 46  | 89  | 84  | 92  | 69  |
| 77  | 81  | 100 | 260 | 336 | 296 | 396 | 333 | 371 | 175 |
| 68  | 77  | 97  | 58  | 63  | 61  | 131 | 169 | 154 | 101 |
| 98  | 89  | 88  | 57  | 72  | 75  | 152 | 150 | 188 | 106 |
| 127 | 105 | 112 | 64  | 82  | 60  | 121 | 124 | 128 | 105 |
| 126 | 136 | 142 | 172 | 181 | 170 | 266 | 250 | 290 | 187 |
| 127 | 122 | 116 | 99  | 101 | 97  | 121 | 135 | 141 | 104 |
| 120 | 123 | 116 | 66  | 73  | 67  | 119 | 126 | 123 | 95  |
| 114 | 96  | 104 | 81  | 114 | 111 | 134 | 134 | 160 | 97  |
| 97  | 78  | 83  | 42  | 52  | 55  | 93  | 103 | 103 | 68  |
| 107 | 93  | 101 | 70  | 89  | 72  | 123 | 114 | 132 | 65  |
| 14  | 12  | 17  | 19  | 9   | 18  | 18  | 19  | 17  | 18  |
| 45  | 35  | 42  | 67  | 92  | 63  | 63  | 42  | 57  | 39  |



|    |    |    |     |     |     |     |     |     |    |
|----|----|----|-----|-----|-----|-----|-----|-----|----|
| 35 | 31 | 45 | 71  | 99  | 88  | 100 | 89  | 63  | 41 |
| 33 | 26 | 35 | 47  | 69  | 73  | 64  | 61  | 52  | 41 |
| 57 | 51 | 63 | 85  | 103 | 113 | 83  | 82  | 74  | 61 |
| 61 | 62 | 54 | 74  | 88  | 63  | 51  | 54  | 68  | 58 |
| 68 | 69 | 72 | 87  | 76  | 62  | 69  | 73  | 78  | 62 |
| 20 | 20 | 36 | 56  | 62  | 47  | 41  | 39  | 37  | 22 |
| 49 | 51 | 52 | 127 | 200 | 168 | 144 | 156 | 154 | 62 |
| 65 | 54 | 69 | 90  | 88  | 65  | 82  | 103 | 84  | 71 |
| 52 | 46 | 50 | 158 | 174 | 134 | 134 | 114 | 138 | 75 |
| 49 | 65 | 55 | 29  | 37  | 30  | 56  | 45  | 48  | 33 |
| 35 | 26 | 36 | 55  | 85  | 45  | 51  | 53  | 50  | 39 |
| 26 | 32 | 50 | 57  | 78  | 45  | 55  | 42  | 66  | 40 |
| 82 | 73 | 87 | 133 | 189 | 142 | 153 | 123 | 149 | 76 |
| 37 | 44 | 56 | 60  | 80  | 72  | 55  | 60  | 60  | 32 |
| 61 | 53 | 62 | 51  | 74  | 76  | 63  | 58  | 59  | 46 |
| 65 | 61 | 69 | 87  | 104 | 101 | 100 | 84  | 93  | 73 |
| 47 | 56 | 52 | 102 | 96  | 85  | 81  | 75  | 75  | 55 |
| 59 | 48 | 67 | 71  | 96  | 80  | 96  | 84  | 85  | 69 |
| 20 | 30 | 37 | 9   | 19  | 7   | 14  | 13  | 15  | 16 |
| 21 | 29 | 18 | 8   | 5   | 9   | 22  | 8   | 12  | 17 |
| 23 | 29 | 23 | 7   | 9   | 9   | 11  | 10  | 13  | 16 |
| 56 | 61 | 49 | 19  | 18  | 21  | 42  | 40  | 44  | 59 |
| 20 | 22 | 17 | 8   | 7   | 6   | 15  | 8   | 10  | 17 |
| 22 | 32 | 22 | 9   | 12  | 11  | 16  | 7   | 10  | 27 |
| 33 | 30 | 48 | 11  | 22  | 17  | 27  | 23  | 16  | 32 |
| 41 | 41 | 48 | 10  | 13  | 8   | 18  | 25  | 22  | 27 |
| 53 | 38 | 55 | 13  | 21  | 10  | 34  | 38  | 44  | 39 |
| 43 | 44 | 62 | 82  | 117 | 111 | 93  | 85  | 64  | 69 |
| 54 | 56 | 51 | 63  | 102 | 86  | 51  | 49  | 64  | 46 |
| 62 | 63 | 57 | 42  | 57  | 53  | 54  | 55  | 57  | 53 |
| 47 | 36 | 49 | 55  | 68  | 52  | 49  | 33  | 42  | 54 |
| 53 | 59 | 59 | 48  | 62  | 60  | 66  | 50  | 52  | 54 |
| 58 | 59 | 70 | 95  | 85  | 104 | 83  | 93  | 88  | 66 |
| 68 | 60 | 79 | 94  | 132 | 107 | 80  | 87  | 89  | 75 |
| 62 | 61 | 61 | 105 | 134 | 134 | 104 | 91  | 101 | 60 |
| 53 | 54 | 66 | 47  | 64  | 70  | 60  | 55  | 51  | 52 |
| 62 | 62 | 72 | 56  | 64  | 65  | 60  | 77  | 59  | 55 |
| 22 | 34 | 38 | 22  | 22  | 11  | 24  | 38  | 26  | 29 |
| 27 | 43 | 30 | 21  | 36  | 29  | 40  | 27  | 30  | 28 |
| 63 | 61 | 87 | 91  | 135 | 100 | 86  | 75  | 88  | 62 |
| 13 | 16 | 14 | 4   | 17  | 15  | 14  | 10  | 12  | 14 |

|     |     |     |     |     |     |     |     |     |     |
|-----|-----|-----|-----|-----|-----|-----|-----|-----|-----|
| 39  | 32  | 38  | 17  | 20  | 22  | 32  | 19  | 24  | 31  |
| 40  | 49  | 33  | 44  | 60  | 43  | 55  | 44  | 51  | 50  |
| 65  | 73  | 74  | 103 | 169 | 113 | 117 | 107 | 105 | 69  |
| 23  | 29  | 28  | 23  | 32  | 28  | 29  | 20  | 29  | 15  |
| 14  | 22  | 17  | 30  | 65  | 38  | 37  | 26  | 53  | 33  |
| 102 | 112 | 110 | 405 | 511 | 450 | 448 | 358 | 415 | 196 |
| 56  | 65  | 63  | 103 | 134 | 117 | 97  | 79  | 84  | 55  |
| 58  | 72  | 69  | 141 | 181 | 158 | 227 | 224 | 184 | 102 |
| 30  | 42  | 37  | 87  | 116 | 88  | 83  | 52  | 70  | 43  |
| 37  | 38  | 38  | 136 | 134 | 111 | 148 | 118 | 144 | 78  |
| 25  | 15  | 20  | 79  | 104 | 82  | 78  | 75  | 84  | 45  |
| 8   | 16  | 19  | 75  | 104 | 63  | 66  | 38  | 51  | 18  |
| 43  | 37  | 48  | 98  | 109 | 89  | 113 | 97  | 125 | 54  |
| 25  | 25  | 23  | 35  | 54  | 39  | 39  | 37  | 41  | 26  |
| 13  | 28  | 38  | 58  | 67  | 51  | 59  | 53  | 63  | 31  |
| 37  | 21  | 25  | 43  | 66  | 51  | 62  | 56  | 59  | 37  |
| 14  | 15  | 19  | 18  | 26  | 22  | 23  | 10  | 19  | 17  |
| 32  | 30  | 35  | 82  | 138 | 89  | 86  | 97  | 96  | 55  |
| 20  | 15  | 15  | 20  | 39  | 29  | 45  | 31  | 41  | 27  |
| 59  | 65  | 83  | 86  | 118 | 90  | 148 | 116 | 152 | 109 |
| 39  | 38  | 31  | 85  | 96  | 92  | 102 | 89  | 82  | 43  |
| 29  | 26  | 46  | 54  | 67  | 62  | 62  | 64  | 75  | 29  |
| 28  | 24  | 25  | 61  | 52  | 45  | 45  | 52  | 54  | 31  |
| 72  | 71  | 84  | 451 | 667 | 533 | 721 | 542 | 621 | 279 |
| 46  | 25  | 43  | 21  | 28  | 16  | 33  | 21  | 43  | 31  |
| 96  | 72  | 111 | 46  | 55  | 58  | 70  | 66  | 76  | 72  |
| 40  | 36  | 41  | 46  | 76  | 60  | 56  | 59  | 67  | 36  |
| 57  | 54  | 57  | 56  | 61  | 47  | 73  | 63  | 72  | 55  |
| 64  | 52  | 72  | 109 | 144 | 129 | 240 | 235 | 249 | 106 |
| 110 | 69  | 103 | 48  | 88  | 71  | 152 | 123 | 145 | 80  |
| 59  | 92  | 80  | 107 | 136 | 115 | 148 | 169 | 162 | 98  |
| 147 | 148 | 185 | 128 | 157 | 137 | 296 | 301 | 274 | 195 |
| 71  | 55  | 81  | 87  | 94  | 89  | 95  | 105 | 126 | 74  |
| 69  | 72  | 93  | 132 | 157 | 133 | 154 | 123 | 164 | 77  |
| 78  | 85  | 80  | 99  | 126 | 142 | 191 | 160 | 177 | 111 |
| 56  | 46  | 49  | 29  | 33  | 24  | 31  | 17  | 32  | 29  |
| 27  | 36  | 19  | 16  | 32  | 34  | 46  | 20  | 45  | 20  |
| 61  | 55  | 65  | 53  | 78  | 62  | 68  | 63  | 72  | 56  |
| 78  | 74  | 82  | 227 | 258 | 256 | 269 | 229 | 261 | 109 |
| 63  | 50  | 48  | 321 | 348 | 336 | 371 | 347 | 371 | 167 |
| 57  | 53  | 58  | 82  | 123 | 94  | 130 | 109 | 119 | 79  |

|    |    |    |     |     |     |     |     |     |     |
|----|----|----|-----|-----|-----|-----|-----|-----|-----|
| 68 | 58 | 86 | 151 | 191 | 149 | 166 | 145 | 167 | 94  |
| 61 | 60 | 67 | 82  | 109 | 91  | 123 | 135 | 137 | 77  |
| 56 | 60 | 63 | 265 | 319 | 247 | 234 | 184 | 216 | 89  |
| 69 | 49 | 48 | 75  | 96  | 103 | 97  | 99  | 113 | 70  |
| 51 | 48 | 43 | 106 | 137 | 97  | 151 | 135 | 154 | 71  |
| 59 | 51 | 77 | 123 | 170 | 121 | 183 | 174 | 161 | 86  |
| 56 | 47 | 59 | 116 | 164 | 134 | 176 | 164 | 161 | 67  |
| 60 | 72 | 72 | 129 | 142 | 140 | 151 | 119 | 143 | 85  |
| 37 | 35 | 53 | 79  | 105 | 86  | 71  | 56  | 51  | 43  |
| 71 | 65 | 85 | 92  | 103 | 100 | 85  | 81  | 83  | 54  |
| 36 | 45 | 53 | 61  | 76  | 66  | 74  | 68  | 81  | 52  |
| 52 | 58 | 59 | 86  | 133 | 121 | 132 | 126 | 161 | 69  |
| 52 | 51 | 50 | 95  | 111 | 101 | 101 | 79  | 113 | 57  |
| 85 | 67 | 73 | 158 | 195 | 174 | 219 | 195 | 210 | 115 |
| 84 | 72 | 86 | 245 | 281 | 244 | 314 | 287 | 293 | 141 |
| 37 | 46 | 45 | 78  | 77  | 68  | 83  | 69  | 68  | 49  |
| 56 | 48 | 55 | 84  | 127 | 116 | 110 | 125 | 135 | 68  |
| 53 | 59 | 78 | 118 | 145 | 137 | 134 | 127 | 175 | 66  |
| 27 | 38 | 34 | 111 | 165 | 118 | 125 | 123 | 100 | 52  |
| 39 | 53 | 39 | 52  | 58  | 69  | 51  | 59  | 51  | 48  |
| 59 | 32 | 52 | 140 | 157 | 121 | 128 | 129 | 172 | 68  |
| 45 | 57 | 59 | 41  | 71  | 52  | 47  | 37  | 60  | 55  |
| 32 | 32 | 42 | 9   | 31  | 18  | 42  | 18  | 29  | 32  |
| 19 | 26 | 13 | 18  | 23  | 12  | 25  | 16  | 17  | 9   |
| 14 | 26 | 29 | 26  | 24  | 31  | 18  | 20  | 18  | 27  |
| 24 | 34 | 39 | 22  | 29  | 28  | 25  | 27  | 29  | 24  |
| 47 | 35 | 56 | 37  | 54  | 49  | 56  | 40  | 47  | 46  |
| 43 | 79 | 60 | 84  | 105 | 107 | 102 | 94  | 96  | 55  |
| 49 | 56 | 51 | 49  | 62  | 51  | 60  | 61  | 75  | 59  |
| 21 | 19 | 20 | 33  | 52  | 54  | 31  | 29  | 39  | 16  |
| 14 | 22 | 26 | 31  | 30  | 23  | 18  | 24  | 20  | 19  |
| 60 | 61 | 77 | 122 | 189 | 168 | 119 | 119 | 139 | 72  |
| 88 | 81 | 72 | 281 | 379 | 321 | 513 | 467 | 512 | 233 |
| 47 | 53 | 46 | 152 | 237 | 186 | 212 | 204 | 201 | 84  |
| 18 | 10 | 21 | 55  | 69  | 43  | 45  | 46  | 49  | 11  |
| 31 | 39 | 48 | 67  | 73  | 73  | 93  | 78  | 84  | 47  |
| 37 | 44 | 55 | 97  | 104 | 134 | 76  | 75  | 74  | 50  |
| 26 | 33 | 36 | 52  | 70  | 84  | 79  | 54  | 72  | 42  |
| 29 | 24 | 39 | 95  | 105 | 78  | 57  | 48  | 65  | 30  |
| 15 | 12 | 28 | 56  | 77  | 49  | 34  | 30  | 46  | 24  |
| 55 | 55 | 57 | 56  | 43  | 27  | 49  | 54  | 47  | 44  |

|     |    |     |     |     |     |     |     |     |     |
|-----|----|-----|-----|-----|-----|-----|-----|-----|-----|
| 87  | 95 | 77  | 121 | 137 | 141 | 166 | 175 | 165 | 108 |
| 56  | 51 | 53  | 67  | 82  | 59  | 76  | 49  | 59  | 27  |
| 45  | 46 | 53  | 155 | 174 | 180 | 194 | 150 | 188 | 76  |
| 103 | 83 | 91  | 135 | 157 | 128 | 195 | 199 | 167 | 118 |
| 64  | 71 | 65  | 60  | 91  | 85  | 95  | 74  | 70  | 52  |
| 81  | 83 | 77  | 137 | 173 | 148 | 147 | 132 | 134 | 70  |
| 75  | 61 | 60  | 125 | 134 | 124 | 139 | 147 | 140 | 67  |
| 69  | 71 | 51  | 92  | 103 | 82  | 95  | 75  | 76  | 59  |
| 84  | 76 | 65  | 297 | 403 | 356 | 525 | 416 | 469 | 218 |
| 70  | 64 | 78  | 137 | 164 | 150 | 120 | 132 | 173 | 77  |
| 42  | 30 | 34  | 114 | 157 | 135 | 126 | 75  | 95  | 68  |
| 43  | 35 | 30  | 147 | 215 | 185 | 180 | 158 | 155 | 73  |
| 78  | 78 | 90  | 149 | 193 | 177 | 258 | 217 | 229 | 114 |
| 103 | 86 | 89  | 406 | 432 | 379 | 435 | 432 | 450 | 194 |
| 85  | 74 | 110 | 551 | 702 | 617 | 685 | 593 | 669 | 294 |
| 49  | 54 | 54  | 197 | 266 | 184 | 204 | 168 | 205 | 79  |
| 31  | 31 | 23  | 64  | 68  | 53  | 84  | 71  | 72  | 34  |
| 28  | 34 | 35  | 145 | 156 | 140 | 128 | 120 | 117 | 60  |
| 72  | 71 | 77  | 250 | 270 | 262 | 212 | 183 | 229 | 113 |
| 79  | 64 | 67  | 107 | 144 | 145 | 129 | 99  | 103 | 66  |
| 22  | 19 | 20  | 29  | 37  | 42  | 45  | 24  | 33  | 27  |
| 43  | 54 | 63  | 55  | 59  | 42  | 55  | 63  | 65  | 49  |
| 93  | 81 | 86  | 110 | 115 | 106 | 92  | 86  | 103 | 75  |
| 41  | 54 | 46  | 125 | 151 | 142 | 136 | 133 | 118 | 79  |
| 28  | 26 | 30  | 44  | 50  | 64  | 37  | 39  | 51  | 31  |
| 50  | 55 | 54  | 107 | 134 | 113 | 119 | 79  | 108 | 49  |
| 63  | 65 | 66  | 116 | 140 | 105 | 118 | 94  | 118 | 69  |
| 8   | 2  | 7   | 8   | 5   | 8   | 7   | 9   | 5   | 10  |
| 51  | 58 | 42  | 51  | 66  | 41  | 46  | 53  | 46  | 47  |
| 61  | 49 | 55  | 52  | 64  | 51  | 42  | 55  | 54  | 37  |
| 57  | 60 | 63  | 159 | 168 | 132 | 160 | 155 | 169 | 79  |
| 46  | 39 | 59  | 81  | 103 | 84  | 72  | 64  | 77  | 48  |
| 36  | 32 | 40  | 40  | 54  | 39  | 40  | 34  | 30  | 34  |
| 36  | 40 | 34  | 41  | 69  | 44  | 46  | 34  | 40  | 37  |
| 70  | 84 | 66  | 54  | 86  | 69  | 98  | 81  | 128 | 60  |
| 38  | 33 | 32  | 64  | 98  | 88  | 74  | 51  | 95  | 55  |
| 61  | 57 | 49  | 41  | 59  | 43  | 53  | 59  | 44  | 47  |
| 44  | 28 | 43  | 122 | 170 | 182 | 196 | 156 | 189 | 77  |
| 74  | 75 | 74  | 194 | 241 | 191 | 213 | 192 | 205 | 98  |
| 72  | 71 | 70  | 63  | 61  | 45  | 67  | 44  | 43  | 28  |
| 13  | 12 | 17  | 26  | 37  | 31  | 22  | 12  | 18  | 6   |

|    |    |     |     |     |     |     |     |     |     |
|----|----|-----|-----|-----|-----|-----|-----|-----|-----|
| 60 | 53 | 53  | 79  | 96  | 105 | 95  | 78  | 96  | 74  |
| 52 | 61 | 79  | 78  | 95  | 82  | 108 | 104 | 110 | 65  |
| 20 | 10 | 29  | 42  | 45  | 43  | 23  | 29  | 34  | 24  |
| 29 | 27 | 33  | 55  | 55  | 68  | 53  | 50  | 52  | 36  |
| 60 | 63 | 92  | 178 | 187 | 181 | 148 | 130 | 124 | 72  |
| 77 | 94 | 101 | 152 | 197 | 189 | 180 | 175 | 190 | 105 |
| 47 | 52 | 37  | 117 | 166 | 124 | 101 | 76  | 131 | 66  |
| 28 | 27 | 51  | 79  | 93  | 76  | 68  | 67  | 61  | 49  |
| 51 | 49 | 66  | 75  | 96  | 80  | 124 | 102 | 109 | 57  |
| 19 | 25 | 34  | 41  | 43  | 49  | 31  | 33  | 35  | 28  |
| 41 | 36 | 43  | 100 | 136 | 117 | 90  | 98  | 114 | 51  |
| 65 | 59 | 83  | 128 | 167 | 135 | 161 | 167 | 181 | 101 |
| 56 | 62 | 65  | 91  | 107 | 115 | 103 | 85  | 102 | 59  |
| 46 | 52 | 56  | 203 | 259 | 235 | 231 | 226 | 242 | 115 |
| 45 | 35 | 60  | 112 | 132 | 126 | 127 | 118 | 108 | 57  |
| 41 | 44 | 46  | 36  | 61  | 54  | 40  | 44  | 37  | 34  |
| 45 | 48 | 55  | 55  | 66  | 72  | 91  | 62  | 71  | 45  |
| 16 | 8  | 22  | 43  | 49  | 52  | 30  | 34  | 33  | 26  |
| 36 | 49 | 36  | 107 | 140 | 101 | 87  | 98  | 90  | 61  |
| 47 | 63 | 65  | 149 | 189 | 144 | 128 | 114 | 129 | 68  |
| 48 | 27 | 35  | 56  | 79  | 61  | 58  | 76  | 58  | 42  |
| 67 | 67 | 65  | 205 | 215 | 207 | 144 | 136 | 142 | 92  |
| 50 | 57 | 68  | 141 | 183 | 139 | 129 | 108 | 124 | 87  |
| 27 | 31 | 37  | 49  | 57  | 36  | 65  | 52  | 57  | 40  |
| 38 | 37 | 32  | 66  | 78  | 80  | 55  | 64  | 63  | 35  |
| 90 | 90 | 123 | 179 | 203 | 186 | 240 | 229 | 240 | 127 |
| 34 | 30 | 40  | 73  | 85  | 80  | 79  | 61  | 57  | 41  |
| 39 | 33 | 43  | 61  | 65  | 67  | 60  | 45  | 53  | 46  |
| 65 | 47 | 51  | 322 | 431 | 380 | 288 | 255 | 318 | 125 |
| 32 | 26 | 41  | 48  | 66  | 41  | 56  | 60  | 64  | 50  |
| 46 | 49 | 43  | 105 | 130 | 145 | 105 | 101 | 101 | 50  |
| 23 | 20 | 33  | 38  | 40  | 64  | 34  | 27  | 38  | 23  |
| 41 | 30 | 39  | 56  | 96  | 73  | 52  | 45  | 46  | 45  |
| 33 | 39 | 32  | 73  | 124 | 91  | 68  | 70  | 77  | 46  |
| 43 | 41 | 49  | 68  | 112 | 91  | 94  | 81  | 99  | 41  |
| 38 | 32 | 44  | 53  | 81  | 63  | 63  | 63  | 87  | 43  |
| 86 | 92 | 110 | 179 | 235 | 186 | 108 | 115 | 134 | 104 |
| 32 | 34 | 28  | 54  | 79  | 81  | 46  | 40  | 33  | 31  |
| 64 | 37 | 46  | 63  | 108 | 82  | 82  | 74  | 85  | 53  |
| 56 | 53 | 69  | 131 | 138 | 138 | 95  | 86  | 89  | 65  |
| 57 | 53 | 58  | 75  | 116 | 88  | 135 | 132 | 126 | 60  |

|    |    |    |     |     |     |     |     |     |     |
|----|----|----|-----|-----|-----|-----|-----|-----|-----|
| 72 | 66 | 72 | 73  | 134 | 95  | 60  | 70  | 77  | 74  |
| 72 | 62 | 66 | 85  | 116 | 129 | 93  | 87  | 102 | 74  |
| 40 | 39 | 51 | 52  | 44  | 52  | 37  | 31  | 45  | 38  |
| 23 | 27 | 24 | 36  | 54  | 39  | 25  | 21  | 28  | 30  |
| 41 | 38 | 39 | 51  | 67  | 40  | 41  | 43  | 44  | 35  |
| 46 | 40 | 53 | 113 | 192 | 168 | 158 | 134 | 157 | 63  |
| 63 | 62 | 57 | 94  | 132 | 102 | 138 | 125 | 147 | 92  |
| 24 | 24 | 34 | 58  | 69  | 58  | 67  | 59  | 48  | 24  |
| 44 | 56 | 59 | 143 | 182 | 140 | 115 | 127 | 112 | 72  |
| 37 | 37 | 37 | 67  | 90  | 79  | 78  | 62  | 60  | 47  |
| 3  | 7  | 2  | 3   | 4   | 4   | 3   | 9   | 9   | 4   |
| 78 | 92 | 83 | 137 | 209 | 158 | 156 | 175 | 162 | 85  |
| 29 | 37 | 32 | 36  | 45  | 40  | 41  | 49  | 60  | 40  |
| 37 | 39 | 60 | 42  | 49  | 42  | 48  | 47  | 40  | 30  |
| 54 | 55 | 53 | 70  | 88  | 74  | 116 | 111 | 148 | 77  |
| 66 | 81 | 76 | 98  | 111 | 92  | 112 | 105 | 97  | 64  |
| 26 | 25 | 26 | 54  | 85  | 76  | 58  | 53  | 65  | 39  |
| 43 | 35 | 45 | 74  | 72  | 75  | 64  | 53  | 67  | 51  |
| 64 | 59 | 70 | 112 | 137 | 120 | 145 | 111 | 132 | 65  |
| 27 | 25 | 47 | 76  | 109 | 104 | 55  | 74  | 64  | 43  |
| 72 | 60 | 72 | 57  | 88  | 76  | 81  | 59  | 67  | 62  |
| 38 | 40 | 36 | 75  | 73  | 63  | 65  | 55  | 57  | 28  |
| 35 | 28 | 35 | 90  | 107 | 80  | 71  | 59  | 74  | 39  |
| 27 | 34 | 33 | 52  | 64  | 60  | 49  | 64  | 60  | 32  |
| 59 | 56 | 67 | 89  | 86  | 86  | 70  | 76  | 85  | 66  |
| 41 | 42 | 53 | 124 | 143 | 94  | 85  | 104 | 94  | 42  |
| 46 | 55 | 44 | 76  | 118 | 100 | 84  | 87  | 89  | 66  |
| 71 | 82 | 99 | 80  | 114 | 120 | 97  | 110 | 107 | 71  |
| 40 | 46 | 45 | 68  | 97  | 72  | 83  | 72  | 79  | 52  |
| 6  | 5  | 8  | 1   | 5   | 5   | 4   | 5   | 2   | 11  |
| 39 | 27 | 40 | 52  | 52  | 34  | 43  | 38  | 39  | 27  |
| 87 | 86 | 84 | 186 | 213 | 215 | 189 | 177 | 194 | 117 |
| 72 | 65 | 66 | 63  | 61  | 51  | 52  | 51  | 46  | 39  |
| 7  | 7  | 9  | 39  | 54  | 37  | 19  | 12  | 17  | 10  |
| 39 | 54 | 65 | 96  | 97  | 103 | 64  | 69  | 80  | 66  |
| 30 | 38 | 32 | 44  | 58  | 58  | 37  | 49  | 29  | 28  |
| 18 | 31 | 37 | 27  | 40  | 33  | 43  | 32  | 41  | 32  |
| 39 | 43 | 52 | 87  | 99  | 79  | 98  | 72  | 83  | 57  |
| 55 | 37 | 48 | 69  | 97  | 87  | 63  | 62  | 76  | 41  |
| 33 | 30 | 22 | 76  | 111 | 86  | 58  | 45  | 47  | 35  |
| 88 | 55 | 73 | 64  | 97  | 84  | 81  | 78  | 79  | 72  |

|    |    |     |     |     |     |     |     |     |     |
|----|----|-----|-----|-----|-----|-----|-----|-----|-----|
| 24 | 18 | 29  | 15  | 17  | 14  | 12  | 7   | 18  | 27  |
| 81 | 65 | 81  | 166 | 237 | 238 | 258 | 258 | 298 | 150 |
| 55 | 56 | 78  | 76  | 104 | 100 | 133 | 107 | 121 | 68  |
| 45 | 73 | 69  | 47  | 66  | 54  | 77  | 90  | 103 | 74  |
| 60 | 48 | 73  | 53  | 61  | 53  | 60  | 52  | 58  | 62  |
| 55 | 71 | 73  | 71  | 84  | 80  | 85  | 68  | 74  | 59  |
| 64 | 60 | 51  | 37  | 51  | 47  | 62  | 56  | 62  | 60  |
| 44 | 41 | 47  | 67  | 80  | 75  | 62  | 70  | 62  | 47  |
| 64 | 67 | 68  | 106 | 138 | 113 | 106 | 112 | 101 | 75  |
| 59 | 45 | 43  | 41  | 49  | 42  | 56  | 54  | 51  | 45  |
| 84 | 64 | 76  | 82  | 79  | 81  | 74  | 81  | 81  | 64  |
| 46 | 37 | 32  | 40  | 34  | 48  | 58  | 63  | 59  | 46  |
| 56 | 43 | 54  | 82  | 93  | 61  | 114 | 93  | 92  | 45  |
| 12 | 2  | 8   | 18  | 23  | 25  | 21  | 23  | 20  | 20  |
| 33 | 36 | 39  | 61  | 65  | 57  | 57  | 61  | 54  | 38  |
| 33 | 31 | 26  | 94  | 127 | 101 | 102 | 95  | 94  | 49  |
| 35 | 35 | 40  | 114 | 130 | 100 | 93  | 60  | 68  | 46  |
| 32 | 25 | 49  | 68  | 73  | 52  | 63  | 49  | 66  | 35  |
| 42 | 35 | 36  | 113 | 156 | 133 | 142 | 116 | 129 | 63  |
| 40 | 32 | 45  | 150 | 188 | 159 | 159 | 146 | 158 | 79  |
| 39 | 46 | 60  | 103 | 139 | 116 | 99  | 86  | 107 | 46  |
| 39 | 39 | 50  | 55  | 57  | 50  | 40  | 36  | 37  | 44  |
| 45 | 40 | 54  | 117 | 179 | 158 | 162 | 139 | 156 | 56  |
| 25 | 30 | 30  | 44  | 60  | 50  | 57  | 33  | 36  | 35  |
| 30 | 26 | 38  | 65  | 74  | 55  | 53  | 39  | 64  | 30  |
| 27 | 22 | 23  | 31  | 39  | 29  | 34  | 37  | 42  | 19  |
| 19 | 27 | 27  | 32  | 46  | 44  | 46  | 39  | 41  | 28  |
| 54 | 44 | 70  | 94  | 97  | 100 | 57  | 63  | 60  | 70  |
| 55 | 43 | 47  | 67  | 78  | 70  | 63  | 51  | 58  | 44  |
| 47 | 39 | 47  | 63  | 90  | 90  | 62  | 76  | 94  | 57  |
| 90 | 81 | 104 | 364 | 468 | 407 | 518 | 430 | 494 | 200 |
| 50 | 53 | 49  | 57  | 90  | 75  | 77  | 69  | 92  | 54  |
| 20 | 40 | 55  | 25  | 49  | 42  | 47  | 43  | 48  | 31  |
| 33 | 25 | 41  | 64  | 73  | 62  | 58  | 46  | 58  | 25  |
| 37 | 32 | 30  | 52  | 48  | 62  | 53  | 44  | 41  | 33  |
| 37 | 22 | 42  | 47  | 47  | 45  | 38  | 34  | 39  | 36  |
| 35 | 30 | 42  | 33  | 20  | 31  | 29  | 37  | 22  | 30  |
| 30 | 43 | 38  | 28  | 45  | 51  | 48  | 57  | 52  | 30  |
| 67 | 70 | 81  | 127 | 188 | 145 | 170 | 151 | 164 | 80  |
| 35 | 42 | 45  | 155 | 200 | 150 | 248 | 180 | 233 | 108 |
| 84 | 71 | 67  | 64  | 76  | 70  | 102 | 95  | 94  | 85  |

|     |     |     |     |     |     |     |     |     |     |
|-----|-----|-----|-----|-----|-----|-----|-----|-----|-----|
| 55  | 40  | 47  | 166 | 172 | 161 | 149 | 116 | 146 | 75  |
| 48  | 39  | 40  | 34  | 43  | 44  | 40  | 36  | 40  | 33  |
| 30  | 42  | 52  | 36  | 67  | 48  | 72  | 38  | 56  | 38  |
| 8   | 6   | 7   | 11  | 18  | 9   | 12  | 12  | 8   | 8   |
| 30  | 46  | 33  | 92  | 130 | 98  | 132 | 131 | 147 | 59  |
| 35  | 33  | 30  | 151 | 180 | 160 | 145 | 119 | 137 | 75  |
| 58  | 50  | 76  | 121 | 135 | 152 | 145 | 132 | 141 | 78  |
| 40  | 25  | 34  | 33  | 52  | 49  | 53  | 40  | 70  | 28  |
| 11  | 7   | 17  | 60  | 80  | 60  | 43  | 37  | 64  | 17  |
| 29  | 27  | 24  | 100 | 130 | 111 | 97  | 87  | 93  | 43  |
| 36  | 42  | 60  | 148 | 196 | 163 | 156 | 146 | 154 | 91  |
| 67  | 64  | 56  | 232 | 320 | 258 | 214 | 208 | 241 | 103 |
| 25  | 30  | 30  | 57  | 71  | 56  | 72  | 50  | 59  | 31  |
| 57  | 61  | 65  | 67  | 86  | 61  | 83  | 69  | 86  | 52  |
| 53  | 55  | 72  | 98  | 120 | 99  | 89  | 83  | 90  | 53  |
| 59  | 36  | 56  | 45  | 54  | 49  | 52  | 42  | 46  | 50  |
| 54  | 52  | 59  | 24  | 34  | 22  | 38  | 36  | 35  | 32  |
| 100 | 101 | 95  | 86  | 96  | 94  | 90  | 128 | 123 | 82  |
| 44  | 46  | 47  | 43  | 48  | 47  | 56  | 56  | 41  | 55  |
| 67  | 66  | 78  | 227 | 249 | 211 | 343 | 332 | 342 | 152 |
| 54  | 53  | 49  | 69  | 58  | 59  | 61  | 46  | 55  | 66  |
| 53  | 53  | 63  | 75  | 86  | 95  | 72  | 83  | 76  | 56  |
| 44  | 39  | 41  | 76  | 100 | 99  | 78  | 58  | 66  | 50  |
| 59  | 52  | 63  | 37  | 46  | 46  | 40  | 38  | 44  | 50  |
| 25  | 22  | 34  | 54  | 53  | 63  | 60  | 46  | 44  | 27  |
| 85  | 121 | 110 | 59  | 95  | 69  | 88  | 66  | 79  | 108 |
| 63  | 72  | 60  | 117 | 136 | 106 | 123 | 133 | 124 | 45  |
| 54  | 48  | 67  | 75  | 89  | 63  | 64  | 73  | 83  | 50  |
| 51  | 71  | 50  | 105 | 109 | 102 | 94  | 90  | 96  | 46  |
| 49  | 34  | 57  | 169 | 240 | 187 | 132 | 117 | 158 | 97  |
| 32  | 32  | 39  | 76  | 75  | 68  | 44  | 56  | 44  | 36  |
| 19  | 28  | 24  | 55  | 65  | 47  | 52  | 32  | 50  | 28  |
| 21  | 17  | 22  | 62  | 83  | 71  | 31  | 31  | 37  | 13  |
| 44  | 43  | 52  | 102 | 151 | 110 | 67  | 62  | 74  | 48  |
| 54  | 54  | 57  | 125 | 169 | 124 | 110 | 89  | 104 | 56  |
| 28  | 17  | 31  | 32  | 28  | 36  | 15  | 29  | 31  | 26  |
| 35  | 51  | 42  | 39  | 64  | 44  | 54  | 66  | 59  | 55  |
| 45  | 27  | 46  | 47  | 61  | 57  | 66  | 56  | 62  | 45  |
| 53  | 34  | 49  | 113 | 159 | 157 | 136 | 134 | 127 | 72  |
| 29  | 39  | 48  | 131 | 149 | 127 | 155 | 127 | 141 | 81  |
| 71  | 81  | 92  | 256 | 329 | 266 | 252 | 243 | 241 | 142 |



|     |     |     |     |     |     |     |     |     |     |
|-----|-----|-----|-----|-----|-----|-----|-----|-----|-----|
| 39  | 49  | 64  | 204 | 214 | 198 | 219 | 243 | 220 | 117 |
| 58  | 54  | 59  | 85  | 112 | 76  | 81  | 69  | 87  | 80  |
| 43  | 51  | 36  | 104 | 146 | 117 | 101 | 100 | 104 | 58  |
| 13  | 18  | 23  | 77  | 115 | 66  | 64  | 66  | 55  | 29  |
| 14  | 15  | 18  | 18  | 37  | 26  | 20  | 21  | 32  | 15  |
| 24  | 31  | 25  | 95  | 126 | 93  | 82  | 52  | 106 | 42  |
| 45  | 61  | 64  | 81  | 112 | 79  | 122 | 136 | 113 | 52  |
| 21  | 15  | 19  | 41  | 66  | 62  | 62  | 44  | 47  | 19  |
| 35  | 42  | 30  | 66  | 97  | 97  | 73  | 92  | 83  | 54  |
| 68  | 56  | 53  | 100 | 102 | 87  | 124 | 105 | 168 | 70  |
| 60  | 55  | 62  | 64  | 85  | 94  | 68  | 47  | 66  | 49  |
| 113 | 107 | 100 | 86  | 101 | 100 | 113 | 92  | 121 | 99  |
| 84  | 87  | 92  | 44  | 50  | 38  | 95  | 89  | 104 | 100 |
| 21  | 35  | 38  | 32  | 37  | 36  | 41  | 29  | 39  | 30  |
| 44  | 48  | 41  | 107 | 140 | 127 | 83  | 79  | 71  | 60  |
| 33  | 42  | 34  | 63  | 58  | 57  | 74  | 80  | 73  | 43  |
| 45  | 38  | 35  | 76  | 98  | 92  | 92  | 83  | 106 | 63  |
| 75  | 64  | 66  | 101 | 122 | 98  | 128 | 118 | 117 | 72  |
| 57  | 55  | 72  | 97  | 105 | 100 | 99  | 87  | 82  | 64  |
| 12  | 25  | 40  | 27  | 41  | 47  | 38  | 38  | 55  | 31  |
| 29  | 30  | 45  | 64  | 88  | 92  | 78  | 71  | 83  | 53  |
| 22  | 29  | 24  | 12  | 25  | 24  | 31  | 34  | 35  | 31  |
| 36  | 48  | 50  | 48  | 52  | 45  | 63  | 53  | 55  | 31  |
| 48  | 50  | 41  | 33  | 42  | 48  | 47  | 43  | 52  | 63  |
| 52  | 49  | 45  | 65  | 76  | 62  | 70  | 85  | 80  | 46  |
| 84  | 70  | 89  | 125 | 127 | 116 | 178 | 223 | 203 | 112 |
| 29  | 25  | 34  | 39  | 43  | 45  | 42  | 35  | 42  | 32  |
| 61  | 67  | 47  | 124 | 192 | 151 | 162 | 137 | 140 | 99  |
| 75  | 45  | 59  | 219 | 294 | 256 | 296 | 277 | 305 | 153 |
| 77  | 79  | 61  | 352 | 459 | 339 | 436 | 393 | 395 | 169 |
| 66  | 58  | 64  | 265 | 331 | 278 | 251 | 208 | 231 | 111 |
| 28  | 31  | 28  | 126 | 176 | 142 | 140 | 97  | 140 | 67  |
| 53  | 41  | 41  | 41  | 47  | 33  | 45  | 40  | 61  | 40  |
| 65  | 67  | 63  | 59  | 59  | 48  | 42  | 47  | 54  | 43  |
| 44  | 51  | 56  | 133 | 151 | 112 | 142 | 132 | 124 | 81  |
| 58  | 43  | 49  | 57  | 51  | 47  | 53  | 38  | 43  | 32  |
| 38  | 48  | 29  | 54  | 81  | 63  | 67  | 55  | 79  | 44  |
| 42  | 46  | 34  | 67  | 65  | 66  | 68  | 63  | 89  | 42  |
| 57  | 46  | 44  | 81  | 113 | 71  | 96  | 73  | 87  | 47  |
| 38  | 34  | 45  | 50  | 68  | 51  | 60  | 47  | 41  | 46  |
| 12  | 13  | 13  | 11  | 13  | 11  | 14  | 8   | 11  | 7   |

|    |    |    |     |     |     |     |     |     |    |
|----|----|----|-----|-----|-----|-----|-----|-----|----|
| 47 | 38 | 37 | 61  | 66  | 63  | 63  | 55  | 65  | 46 |
| 14 | 33 | 29 | 38  | 39  | 38  | 50  | 27  | 34  | 25 |
| 13 | 9  | 14 | 23  | 30  | 24  | 28  | 20  | 21  | 17 |
| 64 | 57 | 51 | 54  | 56  | 59  | 63  | 76  | 63  | 48 |
| 13 | 13 | 20 | 20  | 28  | 32  | 26  | 31  | 26  | 21 |
| 27 | 23 | 28 | 35  | 43  | 43  | 38  | 35  | 28  | 29 |
| 25 | 18 | 19 | 73  | 66  | 52  | 50  | 63  | 47  | 26 |
| 37 | 34 | 48 | 48  | 62  | 73  | 85  | 73  | 72  | 50 |
| 52 | 53 | 56 | 32  | 45  | 58  | 48  | 43  | 53  | 42 |
| 10 | 11 | 12 | 16  | 17  | 20  | 16  | 12  | 15  | 9  |
| 42 | 29 | 43 | 22  | 36  | 25  | 26  | 23  | 30  | 33 |
| 35 | 46 | 42 | 33  | 35  | 22  | 18  | 14  | 18  | 29 |
| 30 | 21 | 30 | 9   | 16  | 17  | 10  | 10  | 12  | 20 |
| 42 | 46 | 48 | 53  | 57  | 38  | 46  | 41  | 62  | 36 |
| 74 | 91 | 89 | 115 | 147 | 138 | 73  | 68  | 65  | 52 |
| 35 | 47 | 32 | 18  | 29  | 19  | 29  | 16  | 18  | 27 |
| 44 | 53 | 49 | 83  | 117 | 87  | 108 | 83  | 105 | 48 |
| 28 | 23 | 38 | 65  | 72  | 63  | 57  | 63  | 72  | 38 |
| 30 | 40 | 35 | 78  | 76  | 88  | 75  | 72  | 88  | 52 |
| 62 | 63 | 63 | 52  | 44  | 37  | 48  | 55  | 61  | 51 |
| 48 | 52 | 39 | 24  | 34  | 29  | 32  | 15  | 26  | 31 |
| 58 | 62 | 86 | 75  | 97  | 74  | 76  | 64  | 71  | 61 |
| 41 | 55 | 53 | 42  | 50  | 44  | 41  | 33  | 44  | 26 |
| 17 | 23 | 27 | 25  | 46  | 28  | 20  | 21  | 28  | 27 |
| 71 | 69 | 72 | 61  | 72  | 64  | 40  | 49  | 58  | 45 |
| 57 | 64 | 68 | 91  | 104 | 92  | 66  | 72  | 100 | 47 |
| 77 | 80 | 79 | 61  | 71  | 61  | 69  | 62  | 57  | 43 |
| 11 | 18 | 24 | 28  | 27  | 26  | 11  | 17  | 17  | 15 |
| 30 | 22 | 15 | 39  | 31  | 32  | 35  | 21  | 39  | 28 |
| 57 | 60 | 61 | 95  | 139 | 124 | 123 | 100 | 109 | 67 |
| 55 | 62 | 52 | 87  | 92  | 116 | 93  | 104 | 105 | 50 |
| 77 | 68 | 86 | 85  | 114 | 108 | 78  | 79  | 98  | 73 |
| 37 | 35 | 62 | 53  | 84  | 70  | 54  | 46  | 55  | 45 |
| 59 | 57 | 44 | 90  | 90  | 96  | 84  | 71  | 65  | 63 |
| 30 | 37 | 50 | 43  | 65  | 60  | 69  | 62  | 83  | 56 |
| 39 | 27 | 49 | 20  | 32  | 28  | 30  | 17  | 23  | 28 |
| 5  | 4  | 4  | 2   | 3   | 3   | 4   | 4   | 3   | 0  |
| 39 | 25 | 35 | 32  | 34  | 49  | 29  | 28  | 29  | 37 |
| 15 | 14 | 33 | 24  | 32  | 21  | 25  | 19  | 24  | 23 |
| 37 | 37 | 49 | 26  | 24  | 18  | 34  | 19  | 21  | 39 |
| 34 | 36 | 27 | 36  | 48  | 29  | 53  | 46  | 62  | 29 |

|     |     |     |     |     |     |     |     |     |     |
|-----|-----|-----|-----|-----|-----|-----|-----|-----|-----|
| 52  | 46  | 42  | 66  | 83  | 72  | 85  | 71  | 80  | 46  |
| 67  | 61  | 79  | 83  | 93  | 95  | 94  | 79  | 115 | 84  |
| 34  | 59  | 42  | 80  | 104 | 68  | 94  | 88  | 80  | 57  |
| 56  | 79  | 71  | 67  | 71  | 79  | 76  | 91  | 101 | 85  |
| 43  | 44  | 45  | 56  | 60  | 61  | 58  | 48  | 63  | 39  |
| 80  | 82  | 60  | 118 | 135 | 131 | 114 | 82  | 109 | 87  |
| 32  | 31  | 38  | 22  | 30  | 16  | 32  | 21  | 30  | 24  |
| 83  | 65  | 83  | 93  | 100 | 86  | 110 | 85  | 81  | 65  |
| 24  | 25  | 44  | 45  | 47  | 52  | 55  | 57  | 59  | 31  |
| 32  | 34  | 35  | 65  | 69  | 83  | 85  | 80  | 107 | 44  |
| 27  | 31  | 31  | 21  | 42  | 45  | 38  | 36  | 53  | 27  |
| 139 | 124 | 156 | 120 | 156 | 122 | 187 | 148 | 156 | 118 |
| 42  | 33  | 34  | 59  | 79  | 65  | 85  | 84  | 95  | 48  |
| 22  | 20  | 25  | 30  | 42  | 35  | 30  | 23  | 36  | 21  |
| 20  | 30  | 38  | 44  | 65  | 35  | 31  | 39  | 36  | 22  |
| 40  | 31  | 41  | 52  | 79  | 57  | 61  | 43  | 52  | 54  |
| 45  | 39  | 52  | 69  | 66  | 71  | 96  | 74  | 70  | 45  |
| 21  | 27  | 23  | 49  | 87  | 61  | 59  | 42  | 40  | 37  |
| 26  | 23  | 36  | 60  | 94  | 59  | 72  | 46  | 60  | 37  |
| 12  | 14  | 16  | 16  | 16  | 15  | 16  | 6   | 3   | 11  |
| 37  | 35  | 33  | 39  | 35  | 43  | 24  | 21  | 25  | 28  |
| 48  | 50  | 58  | 49  | 49  | 62  | 53  | 54  | 48  | 50  |
| 51  | 49  | 58  | 84  | 80  | 70  | 60  | 55  | 51  | 34  |
| 32  | 43  | 34  | 46  | 64  | 54  | 35  | 22  | 33  | 27  |
| 38  | 38  | 31  | 61  | 53  | 51  | 51  | 52  | 56  | 40  |
| 80  | 68  | 65  | 93  | 132 | 115 | 99  | 97  | 118 | 81  |
| 46  | 47  | 59  | 88  | 121 | 97  | 106 | 80  | 82  | 52  |
| 33  | 43  | 43  | 61  | 71  | 59  | 87  | 56  | 84  | 56  |
| 52  | 38  | 48  | 60  | 79  | 72  | 58  | 60  | 58  | 30  |
| 18  | 11  | 24  | 20  | 31  | 25  | 35  | 36  | 30  | 24  |
| 61  | 60  | 94  | 69  | 75  | 89  | 97  | 107 | 111 | 79  |
| 8   | 5   | 8   | 8   | 4   | 1   | 6   | 1   | 4   | 3   |
| 11  | 18  | 14  | 10  | 20  | 24  | 15  | 18  | 19  | 18  |
| 22  | 18  | 17  | 41  | 43  | 51  | 38  | 42  | 50  | 19  |
| 47  | 39  | 45  | 42  | 38  | 36  | 34  | 39  | 33  | 37  |
| 16  | 33  | 22  | 40  | 38  | 39  | 53  | 41  | 36  | 30  |
| 20  | 18  | 17  | 11  | 19  | 15  | 19  | 14  | 14  | 14  |
| 5   | 2   | 1   | 4   | 5   | 1   | 4   | 2   | 4   | 3   |
| 37  | 57  | 51  | 66  | 89  | 63  | 63  | 61  | 77  | 43  |
| 40  | 31  | 38  | 72  | 106 | 99  | 62  | 42  | 57  | 31  |
| 18  | 27  | 30  | 58  | 55  | 56  | 39  | 26  | 33  | 32  |

|     |     |     |     |     |     |     |     |     |     |
|-----|-----|-----|-----|-----|-----|-----|-----|-----|-----|
| 13  | 20  | 28  | 30  | 37  | 28  | 36  | 19  | 27  | 21  |
| 26  | 27  | 22  | 28  | 47  | 39  | 40  | 35  | 42  | 13  |
| 45  | 44  | 50  | 92  | 109 | 95  | 89  | 90  | 96  | 58  |
| 29  | 36  | 32  | 108 | 141 | 133 | 104 | 89  | 109 | 49  |
| 20  | 22  | 30  | 45  | 58  | 55  | 44  | 42  | 56  | 27  |
| 96  | 114 | 93  | 142 | 171 | 152 | 138 | 146 | 163 | 95  |
| 50  | 44  | 38  | 103 | 125 | 131 | 102 | 89  | 77  | 50  |
| 67  | 70  | 71  | 67  | 77  | 66  | 67  | 48  | 68  | 51  |
| 40  | 42  | 50  | 49  | 65  | 65  | 49  | 52  | 48  | 29  |
| 39  | 56  | 46  | 173 | 185 | 141 | 166 | 159 | 169 | 82  |
| 21  | 35  | 34  | 59  | 61  | 53  | 59  | 35  | 45  | 28  |
| 33  | 45  | 36  | 40  | 41  | 40  | 45  | 39  | 51  | 25  |
| 66  | 64  | 66  | 93  | 119 | 128 | 151 | 129 | 148 | 79  |
| 56  | 49  | 40  | 164 | 161 | 161 | 189 | 142 | 181 | 83  |
| 39  | 34  | 34  | 47  | 58  | 56  | 52  | 38  | 55  | 36  |
| 42  | 63  | 36  | 92  | 121 | 110 | 66  | 67  | 81  | 53  |
| 43  | 59  | 49  | 192 | 239 | 217 | 323 | 277 | 306 | 137 |
| 42  | 46  | 33  | 56  | 67  | 82  | 85  | 58  | 78  | 43  |
| 8   | 10  | 14  | 7   | 17  | 4   | 7   | 10  | 6   | 11  |
| 15  | 11  | 20  | 23  | 29  | 28  | 18  | 9   | 15  | 14  |
| 20  | 22  | 31  | 51  | 43  | 37  | 41  | 41  | 39  | 34  |
| 4   | 6   | 5   | 10  | 8   | 5   | 10  | 11  | 7   | 7   |
| 27  | 35  | 30  | 27  | 31  | 33  | 29  | 27  | 36  | 38  |
| 50  | 35  | 49  | 87  | 81  | 93  | 95  | 70  | 81  | 45  |
| 65  | 60  | 48  | 58  | 77  | 66  | 69  | 59  | 66  | 51  |
| 24  | 25  | 26  | 20  | 24  | 26  | 16  | 21  | 23  | 18  |
| 73  | 77  | 98  | 75  | 95  | 60  | 59  | 58  | 68  | 43  |
| 152 | 144 | 147 | 90  | 109 | 100 | 142 | 97  | 115 | 143 |
| 32  | 42  | 36  | 70  | 75  | 72  | 99  | 101 | 111 | 40  |
| 51  | 46  | 60  | 58  | 85  | 71  | 107 | 114 | 96  | 64  |
| 39  | 39  | 55  | 64  | 73  | 75  | 96  | 96  | 83  | 50  |
| 58  | 54  | 63  | 78  | 119 | 114 | 79  | 89  | 85  | 63  |
| 48  | 69  | 60  | 76  | 107 | 92  | 109 | 95  | 113 | 53  |
| 4   | 12  | 10  | 12  | 17  | 12  | 13  | 10  | 8   | 8   |
| 35  | 30  | 28  | 52  | 78  | 47  | 75  | 78  | 89  | 52  |
| 60  | 62  | 71  | 66  | 88  | 79  | 88  | 112 | 106 | 57  |
| 58  | 57  | 62  | 197 | 287 | 232 | 279 | 212 | 262 | 120 |
| 34  | 32  | 36  | 171 | 192 | 165 | 203 | 144 | 185 | 71  |
| 26  | 38  | 34  | 113 | 127 | 97  | 131 | 110 | 121 | 54  |
| 45  | 46  | 56  | 160 | 207 | 174 | 230 | 221 | 273 | 102 |
| 78  | 69  | 85  | 345 | 423 | 431 | 454 | 317 | 400 | 195 |

|     |     |     |     |     |     |     |     |     |     |
|-----|-----|-----|-----|-----|-----|-----|-----|-----|-----|
| 79  | 76  | 73  | 251 | 320 | 338 | 378 | 338 | 375 | 153 |
| 48  | 49  | 56  | 223 | 250 | 235 | 244 | 192 | 223 | 104 |
| 29  | 32  | 38  | 170 | 217 | 145 | 155 | 123 | 145 | 71  |
| 67  | 66  | 57  | 81  | 116 | 90  | 139 | 95  | 124 | 64  |
| 18  | 20  | 28  | 25  | 31  | 17  | 32  | 28  | 38  | 20  |
| 15  | 13  | 26  | 57  | 68  | 61  | 56  | 56  | 69  | 34  |
| 20  | 22  | 37  | 109 | 133 | 123 | 135 | 93  | 110 | 38  |
| 12  | 15  | 15  | 16  | 21  | 24  | 27  | 18  | 23  | 15  |
| 31  | 34  | 27  | 20  | 23  | 30  | 16  | 13  | 21  | 18  |
| 19  | 31  | 32  | 39  | 33  | 36  | 39  | 25  | 36  | 22  |
| 51  | 49  | 42  | 50  | 78  | 52  | 47  | 50  | 44  | 44  |
| 24  | 29  | 32  | 57  | 65  | 67  | 38  | 33  | 39  | 29  |
| 10  | 14  | 11  | 15  | 13  | 23  | 21  | 20  | 17  | 11  |
| 45  | 32  | 34  | 48  | 65  | 48  | 56  | 47  | 44  | 33  |
| 59  | 51  | 43  | 59  | 60  | 64  | 52  | 53  | 50  | 25  |
| 11  | 23  | 19  | 33  | 41  | 30  | 36  | 29  | 29  | 24  |
| 19  | 16  | 14  | 4   | 9   | 12  | 4   | 4   | 6   | 12  |
| 79  | 99  | 79  | 206 | 230 | 232 | 363 | 357 | 381 | 183 |
| 27  | 30  | 39  | 70  | 77  | 83  | 149 | 131 | 138 | 73  |
| 53  | 72  | 59  | 95  | 121 | 86  | 82  | 82  | 104 | 51  |
| 31  | 22  | 20  | 44  | 46  | 47  | 42  | 33  | 37  | 39  |
| 54  | 62  | 46  | 41  | 64  | 54  | 33  | 32  | 57  | 45  |
| 18  | 34  | 36  | 36  | 33  | 23  | 29  | 26  | 36  | 27  |
| 41  | 26  | 44  | 81  | 97  | 83  | 106 | 91  | 103 | 48  |
| 39  | 41  | 46  | 39  | 48  | 39  | 53  | 45  | 46  | 41  |
| 74  | 66  | 82  | 51  | 72  | 92  | 73  | 55  | 70  | 54  |
| 70  | 77  | 83  | 46  | 67  | 57  | 55  | 57  | 65  | 70  |
| 47  | 57  | 49  | 113 | 120 | 121 | 116 | 109 | 112 | 86  |
| 100 | 76  | 103 | 91  | 107 | 105 | 136 | 117 | 134 | 106 |
| 18  | 34  | 35  | 52  | 66  | 55  | 66  | 71  | 60  | 46  |
| 63  | 71  | 86  | 85  | 103 | 77  | 107 | 99  | 116 | 83  |
| 81  | 85  | 74  | 113 | 173 | 166 | 139 | 115 | 130 | 73  |
| 52  | 64  | 51  | 152 | 191 | 139 | 201 | 196 | 213 | 80  |
| 73  | 69  | 89  | 112 | 177 | 124 | 172 | 131 | 171 | 89  |
| 42  | 44  | 48  | 49  | 86  | 79  | 81  | 80  | 72  | 42  |
| 69  | 72  | 77  | 107 | 142 | 114 | 211 | 176 | 212 | 101 |
| 93  | 87  | 101 | 102 | 143 | 140 | 199 | 173 | 205 | 112 |
| 56  | 59  | 59  | 88  | 115 | 78  | 125 | 103 | 101 | 40  |
| 71  | 100 | 81  | 96  | 143 | 100 | 137 | 136 | 124 | 64  |
| 31  | 32  | 25  | 49  | 70  | 56  | 57  | 46  | 62  | 28  |
| 21  | 24  | 31  | 45  | 65  | 40  | 50  | 54  | 61  | 19  |

|     |     |     |     |     |     |     |     |     |     |
|-----|-----|-----|-----|-----|-----|-----|-----|-----|-----|
| 51  | 50  | 56  | 97  | 111 | 101 | 87  | 86  | 76  | 67  |
| 46  | 43  | 56  | 73  | 77  | 75  | 76  | 62  | 74  | 45  |
| 48  | 50  | 49  | 63  | 86  | 66  | 71  | 62  | 58  | 47  |
| 44  | 53  | 42  | 75  | 70  | 83  | 86  | 100 | 74  | 51  |
| 13  | 11  | 13  | 14  | 15  | 14  | 23  | 16  | 15  | 12  |
| 50  | 42  | 57  | 57  | 81  | 67  | 82  | 60  | 73  | 49  |
| 51  | 33  | 46  | 81  | 139 | 123 | 112 | 109 | 122 | 69  |
| 58  | 55  | 60  | 71  | 89  | 74  | 72  | 69  | 78  | 73  |
| 46  | 40  | 54  | 111 | 113 | 117 | 92  | 76  | 69  | 45  |
| 48  | 47  | 56  | 148 | 193 | 191 | 105 | 76  | 97  | 60  |
| 35  | 38  | 36  | 79  | 123 | 73  | 136 | 99  | 93  | 48  |
| 62  | 65  | 98  | 93  | 115 | 102 | 118 | 101 | 114 | 90  |
| 60  | 79  | 90  | 73  | 113 | 75  | 83  | 77  | 81  | 72  |
| 26  | 16  | 18  | 15  | 18  | 18  | 16  | 18  | 10  | 20  |
| 3   | 2   | 1   | 1   | 3   | 1   | 3   | 2   | 2   | 3   |
| 94  | 83  | 98  | 69  | 79  | 65  | 112 | 108 | 128 | 73  |
| 100 | 104 | 118 | 165 | 159 | 168 | 304 | 336 | 342 | 167 |
| 81  | 57  | 85  | 51  | 55  | 48  | 49  | 48  | 48  | 52  |
| 130 | 114 | 126 | 180 | 255 | 257 | 322 | 316 | 332 | 153 |
| 121 | 133 | 137 | 135 | 166 | 164 | 147 | 182 | 162 | 116 |
| 130 | 123 | 146 | 121 | 144 | 126 | 177 | 183 | 190 | 164 |
| 32  | 43  | 39  | 33  | 46  | 33  | 24  | 26  | 28  | 36  |
| 26  | 24  | 27  | 31  | 66  | 43  | 59  | 50  | 53  | 30  |
| 34  | 39  | 37  | 77  | 87  | 79  | 56  | 55  | 73  | 45  |
| 64  | 51  | 65  | 183 | 239 | 212 | 154 | 162 | 163 | 77  |
| 43  | 31  | 43  | 160 | 179 | 148 | 170 | 143 | 137 | 79  |
| 60  | 52  | 68  | 121 | 164 | 145 | 158 | 114 | 138 | 78  |
| 44  | 46  | 35  | 73  | 85  | 73  | 56  | 71  | 72  | 46  |
| 17  | 16  | 20  | 31  | 34  | 34  | 26  | 29  | 26  | 13  |
| 26  | 36  | 34  | 13  | 14  | 17  | 11  | 15  | 6   | 19  |
| 103 | 98  | 82  | 64  | 88  | 93  | 64  | 49  | 55  | 59  |
| 19  | 15  | 13  | 7   | 11  | 8   | 16  | 9   | 13  | 8   |
| 36  | 32  | 51  | 25  | 30  | 30  | 21  | 29  | 33  | 38  |
| 21  | 23  | 20  | 80  | 131 | 91  | 74  | 58  | 82  | 35  |
| 35  | 43  | 40  | 48  | 65  | 50  | 34  | 23  | 29  | 32  |
| 30  | 35  | 37  | 175 | 225 | 171 | 237 | 200 | 224 | 111 |
| 51  | 71  | 58  | 91  | 129 | 95  | 69  | 83  | 82  | 50  |
| 21  | 39  | 40  | 82  | 79  | 78  | 49  | 73  | 69  | 28  |
| 14  | 16  | 21  | 22  | 41  | 39  | 30  | 17  | 33  | 16  |
| 56  | 49  | 43  | 57  | 52  | 36  | 58  | 42  | 62  | 40  |
| 20  | 22  | 22  | 57  | 59  | 57  | 44  | 44  | 43  | 19  |

|     |     |     |     |     |     |     |     |     |     |
|-----|-----|-----|-----|-----|-----|-----|-----|-----|-----|
| 14  | 19  | 18  | 77  | 102 | 91  | 59  | 56  | 44  | 28  |
| 12  | 7   | 8   | 15  | 23  | 31  | 18  | 19  | 16  | 15  |
| 45  | 39  | 41  | 34  | 57  | 59  | 74  | 61  | 73  | 49  |
| 55  | 54  | 37  | 122 | 144 | 139 | 145 | 145 | 164 | 88  |
| 49  | 45  | 50  | 264 | 345 | 294 | 437 | 407 | 459 | 155 |
| 94  | 88  | 106 | 164 | 209 | 202 | 358 | 356 | 378 | 197 |
| 27  | 31  | 26  | 66  | 80  | 68  | 70  | 51  | 69  | 25  |
| 69  | 77  | 80  | 171 | 210 | 179 | 133 | 104 | 127 | 90  |
| 53  | 48  | 40  | 87  | 127 | 106 | 110 | 105 | 105 | 51  |
| 70  | 67  | 70  | 328 | 328 | 322 | 254 | 279 | 290 | 125 |
| 71  | 80  | 69  | 104 | 117 | 96  | 99  | 88  | 87  | 60  |
| 9   | 13  | 17  | 8   | 7   | 3   | 9   | 8   | 5   | 2   |
| 6   | 6   | 7   | 10  | 14  | 14  | 12  | 6   | 10  | 9   |
| 0   | 2   | 3   | 1   | 0   | 1   | 1   | 0   | 1   | 3   |
| 6   | 4   | 4   | 6   | 10  | 8   | 7   | 12  | 9   | 3   |
| 1   | 2   | 3   | 1   | 2   | 3   | 1   | 4   | 3   | 4   |
| 16  | 8   | 11  | 12  | 10  | 13  | 4   | 14  | 12  | 3   |
| 9   | 14  | 19  | 3   | 3   | 0   | 8   | 6   | 7   | 11  |
| 1   | 2   | 0   | 1   | 1   | 0   | 0   | 0   | 1   | 1   |
| 5   | 9   | 9   | 16  | 19  | 11  | 8   | 7   | 20  | 9   |
| 11  | 8   | 10  | 10  | 3   | 13  | 5   | 9   | 6   | 6   |
| 56  | 48  | 54  | 61  | 88  | 81  | 65  | 65  | 81  | 54  |
| 21  | 23  | 18  | 39  | 33  | 45  | 21  | 38  | 34  | 25  |
| 51  | 56  | 46  | 39  | 50  | 54  | 41  | 44  | 52  | 33  |
| 27  | 27  | 30  | 29  | 31  | 41  | 43  | 43  | 50  | 27  |
| 35  | 33  | 27  | 47  | 68  | 52  | 40  | 31  | 44  | 40  |
| 23  | 26  | 24  | 26  | 29  | 39  | 34  | 23  | 32  | 29  |
| 53  | 52  | 53  | 73  | 81  | 87  | 104 | 85  | 68  | 55  |
| 12  | 9   | 12  | 36  | 65  | 37  | 34  | 39  | 42  | 21  |
| 27  | 29  | 31  | 97  | 156 | 115 | 90  | 93  | 75  | 35  |
| 42  | 30  | 27  | 82  | 162 | 121 | 89  | 58  | 73  | 38  |
| 77  | 62  | 78  | 181 | 267 | 173 | 105 | 99  | 111 | 41  |
| 33  | 28  | 39  | 117 | 172 | 127 | 89  | 112 | 100 | 55  |
| 60  | 65  | 62  | 104 | 128 | 125 | 82  | 70  | 96  | 74  |
| 135 | 122 | 164 | 114 | 103 | 101 | 134 | 118 | 140 | 129 |
| 53  | 68  | 65  | 80  | 97  | 85  | 89  | 79  | 87  | 62  |
| 43  | 36  | 37  | 38  | 41  | 31  | 45  | 33  | 30  | 37  |
| 59  | 56  | 57  | 103 | 124 | 123 | 145 | 143 | 151 | 82  |
| 52  | 51  | 42  | 73  | 69  | 76  | 63  | 65  | 73  | 55  |
| 78  | 86  | 87  | 125 | 149 | 137 | 214 | 187 | 189 | 125 |
| 25  | 29  | 34  | 46  | 53  | 33  | 41  | 33  | 29  | 28  |

|     |     |     |     |     |     |     |     |     |     |
|-----|-----|-----|-----|-----|-----|-----|-----|-----|-----|
| 77  | 81  | 89  | 193 | 195 | 174 | 242 | 209 | 232 | 111 |
| 109 | 98  | 124 | 62  | 88  | 94  | 119 | 147 | 130 | 102 |
| 81  | 89  | 78  | 114 | 144 | 141 | 167 | 145 | 153 | 106 |
| 57  | 64  | 87  | 86  | 118 | 84  | 71  | 62  | 74  | 59  |
| 44  | 41  | 41  | 61  | 83  | 45  | 69  | 53  | 81  | 44  |
| 26  | 40  | 37  | 41  | 72  | 70  | 47  | 66  | 73  | 33  |
| 64  | 53  | 58  | 72  | 88  | 87  | 71  | 50  | 68  | 40  |
| 103 | 122 | 125 | 82  | 107 | 119 | 140 | 113 | 125 | 75  |
| 22  | 30  | 28  | 40  | 40  | 33  | 68  | 46  | 43  | 27  |
| 66  | 50  | 53  | 83  | 113 | 155 | 158 | 198 | 178 | 88  |
| 205 | 254 | 252 | 160 | 170 | 154 | 262 | 253 | 317 | 220 |
| 92  | 81  | 79  | 88  | 94  | 95  | 135 | 149 | 118 | 76  |
| 45  | 59  | 65  | 31  | 45  | 44  | 24  | 39  | 31  | 31  |
| 38  | 32  | 34  | 88  | 120 | 90  | 63  | 69  | 69  | 31  |
| 49  | 43  | 45  | 30  | 25  | 23  | 31  | 34  | 48  | 37  |
| 21  | 25  | 20  | 39  | 54  | 45  | 54  | 42  | 52  | 30  |
| 36  | 32  | 44  | 61  | 105 | 103 | 86  | 72  | 82  | 46  |
| 41  | 26  | 28  | 28  | 38  | 44  | 34  | 30  | 32  | 28  |
| 39  | 42  | 37  | 80  | 105 | 83  | 71  | 82  | 90  | 38  |
| 13  | 11  | 15  | 5   | 6   | 4   | 11  | 4   | 4   | 6   |
| 40  | 23  | 52  | 71  | 75  | 76  | 85  | 77  | 93  | 52  |
| 28  | 15  | 28  | 30  | 30  | 23  | 30  | 29  | 27  | 19  |
| 34  | 39  | 39  | 90  | 118 | 105 | 74  | 71  | 91  | 45  |
| 26  | 22  | 29  | 16  | 20  | 18  | 12  | 16  | 15  | 18  |
| 4   | 3   | 4   | 2   | 5   | 6   | 3   | 1   | 1   | 1   |
| 37  | 35  | 33  | 75  | 91  | 70  | 65  | 70  | 88  | 41  |
| 29  | 47  | 40  | 23  | 26  | 32  | 43  | 45  | 30  | 25  |
| 2   | 6   | 8   | 2   | 9   | 6   | 7   | 4   | 12  | 9   |
| 62  | 78  | 86  | 165 | 247 | 168 | 252 | 208 | 213 | 122 |
| 36  | 40  | 38  | 50  | 57  | 54  | 47  | 58  | 56  | 38  |
| 49  | 57  | 47  | 91  | 125 | 122 | 85  | 82  | 82  | 56  |
| 22  | 29  | 25  | 81  | 94  | 77  | 70  | 79  | 78  | 38  |
| 26  | 24  | 33  | 45  | 43  | 53  | 57  | 37  | 43  | 26  |
| 30  | 28  | 35  | 54  | 71  | 52  | 72  | 64  | 52  | 36  |
| 51  | 66  | 61  | 36  | 55  | 42  | 40  | 37  | 45  | 29  |
| 47  | 51  | 48  | 46  | 51  | 56  | 45  | 40  | 51  | 54  |
| 35  | 38  | 45  | 45  | 65  | 60  | 59  | 44  | 48  | 44  |
| 50  | 45  | 58  | 216 | 298 | 272 | 218 | 225 | 245 | 102 |
| 62  | 52  | 55  | 89  | 114 | 90  | 124 | 120 | 120 | 54  |
| 56  | 60  | 61  | 143 | 153 | 132 | 160 | 156 | 166 | 80  |
| 115 | 89  | 99  | 168 | 182 | 193 | 191 | 151 | 172 | 106 |



|     |    |     |     |     |     |     |     |     |     |
|-----|----|-----|-----|-----|-----|-----|-----|-----|-----|
| 19  | 22 | 19  | 28  | 54  | 32  | 33  | 23  | 44  | 25  |
| 43  | 52 | 54  | 87  | 119 | 103 | 82  | 78  | 88  | 51  |
| 26  | 34 | 32  | 119 | 137 | 135 | 137 | 128 | 111 | 63  |
| 40  | 41 | 56  | 105 | 115 | 96  | 95  | 74  | 105 | 56  |
| 51  | 52 | 70  | 100 | 153 | 113 | 93  | 73  | 114 | 44  |
| 59  | 59 | 63  | 142 | 186 | 149 | 222 | 163 | 172 | 104 |
| 34  | 27 | 37  | 54  | 70  | 67  | 32  | 32  | 40  | 38  |
| 37  | 36 | 43  | 119 | 153 | 159 | 166 | 163 | 179 | 88  |
| 41  | 31 | 33  | 61  | 96  | 69  | 51  | 47  | 44  | 40  |
| 51  | 45 | 50  | 102 | 126 | 139 | 106 | 96  | 95  | 63  |
| 24  | 22 | 24  | 25  | 22  | 29  | 28  | 20  | 35  | 18  |
| 29  | 35 | 46  | 109 | 107 | 115 | 78  | 93  | 105 | 56  |
| 30  | 38 | 35  | 56  | 70  | 80  | 56  | 71  | 47  | 43  |
| 31  | 23 | 27  | 37  | 43  | 41  | 32  | 28  | 27  | 22  |
| 56  | 59 | 54  | 85  | 125 | 108 | 101 | 80  | 96  | 63  |
| 44  | 54 | 40  | 116 | 127 | 96  | 117 | 124 | 112 | 63  |
| 19  | 25 | 21  | 37  | 36  | 27  | 26  | 24  | 20  | 25  |
| 57  | 63 | 51  | 49  | 59  | 33  | 63  | 41  | 59  | 46  |
| 81  | 94 | 109 | 110 | 146 | 120 | 121 | 102 | 123 | 95  |
| 103 | 88 | 103 | 114 | 121 | 150 | 162 | 159 | 175 | 130 |
| 25  | 25 | 28  | 38  | 49  | 40  | 67  | 47  | 72  | 34  |
| 27  | 31 | 37  | 35  | 37  | 36  | 27  | 28  | 22  | 39  |
| 30  | 26 | 37  | 24  | 34  | 26  | 31  | 28  | 28  | 30  |
| 52  | 40 | 49  | 70  | 83  | 66  | 50  | 53  | 58  | 28  |
| 16  | 14 | 22  | 14  | 12  | 16  | 9   | 16  | 10  | 19  |
| 23  | 45 | 49  | 54  | 45  | 39  | 47  | 46  | 56  | 48  |
| 21  | 15 | 20  | 14  | 26  | 16  | 15  | 11  | 24  | 16  |
| 33  | 37 | 53  | 62  | 47  | 40  | 46  | 41  | 52  | 38  |
| 38  | 35 | 29  | 34  | 31  | 27  | 24  | 21  | 30  | 18  |
| 24  | 28 | 20  | 34  | 41  | 46  | 36  | 39  | 38  | 34  |
| 65  | 51 | 63  | 45  | 30  | 27  | 71  | 55  | 56  | 52  |
| 54  | 37 | 50  | 20  | 33  | 26  | 31  | 45  | 38  | 42  |
| 65  | 64 | 69  | 82  | 89  | 78  | 129 | 91  | 114 | 54  |
| 26  | 22 | 26  | 44  | 35  | 22  | 32  | 36  | 34  | 25  |
| 37  | 46 | 35  | 44  | 50  | 42  | 67  | 48  | 58  | 46  |
| 38  | 29 | 18  | 282 | 349 | 289 | 368 | 316 | 353 | 196 |
| 34  | 37 | 32  | 64  | 92  | 66  | 47  | 65  | 72  | 40  |
| 16  | 22 | 25  | 100 | 120 | 92  | 77  | 58  | 96  | 36  |
| 47  | 48 | 44  | 53  | 70  | 72  | 56  | 53  | 72  | 45  |
| 55  | 61 | 52  | 158 | 205 | 170 | 142 | 140 | 151 | 70  |
| 24  | 36 | 40  | 47  | 66  | 60  | 52  | 51  | 50  | 42  |

|     |     |     |     |     |     |     |     |     |     |
|-----|-----|-----|-----|-----|-----|-----|-----|-----|-----|
| 73  | 49  | 52  | 268 | 311 | 308 | 293 | 249 | 270 | 142 |
| 26  | 27  | 36  | 212 | 306 | 242 | 224 | 203 | 227 | 103 |
| 35  | 30  | 34  | 50  | 63  | 48  | 59  | 54  | 41  | 38  |
| 31  | 41  | 47  | 54  | 52  | 48  | 69  | 77  | 77  | 49  |
| 27  | 34  | 36  | 64  | 84  | 49  | 24  | 25  | 25  | 20  |
| 40  | 46  | 33  | 53  | 73  | 62  | 34  | 25  | 39  | 35  |
| 41  | 41  | 48  | 46  | 66  | 47  | 27  | 24  | 29  | 19  |
| 20  | 29  | 31  | 19  | 36  | 29  | 12  | 12  | 14  | 14  |
| 33  | 30  | 34  | 31  | 40  | 26  | 14  | 15  | 13  | 23  |
| 37  | 34  | 38  | 94  | 88  | 95  | 77  | 74  | 60  | 40  |
| 59  | 65  | 56  | 94  | 126 | 118 | 113 | 99  | 136 | 72  |
| 22  | 27  | 24  | 73  | 82  | 102 | 52  | 64  | 72  | 33  |
| 28  | 40  | 35  | 142 | 188 | 176 | 167 | 155 | 189 | 72  |
| 8   | 15  | 12  | 15  | 25  | 11  | 12  | 14  | 17  | 6   |
| 28  | 42  | 33  | 60  | 97  | 79  | 72  | 52  | 69  | 31  |
| 17  | 15  | 14  | 27  | 37  | 35  | 41  | 29  | 32  | 17  |
| 33  | 29  | 38  | 41  | 74  | 51  | 63  | 58  | 61  | 53  |
| 82  | 73  | 99  | 86  | 153 | 149 | 171 | 153 | 158 | 108 |
| 88  | 101 | 72  | 83  | 104 | 101 | 171 | 173 | 191 | 111 |
| 31  | 35  | 28  | 44  | 60  | 43  | 36  | 42  | 28  | 25  |
| 24  | 22  | 20  | 12  | 24  | 30  | 17  | 16  | 14  | 18  |
| 70  | 59  | 73  | 127 | 206 | 172 | 187 | 182 | 217 | 105 |
| 43  | 40  | 58  | 58  | 70  | 66  | 71  | 73  | 69  | 56  |
| 40  | 48  | 43  | 71  | 90  | 92  | 43  | 56  | 57  | 55  |
| 35  | 28  | 25  | 46  | 49  | 40  | 40  | 36  | 48  | 29  |
| 123 | 120 | 132 | 126 | 174 | 149 | 173 | 178 | 171 | 136 |
| 52  | 66  | 90  | 51  | 70  | 62  | 57  | 56  | 63  | 43  |
| 38  | 59  | 55  | 149 | 195 | 173 | 155 | 130 | 138 | 60  |
| 56  | 50  | 45  | 101 | 159 | 144 | 114 | 109 | 110 | 56  |
| 83  | 83  | 86  | 75  | 85  | 70  | 91  | 88  | 87  | 76  |
| 89  | 85  | 76  | 145 | 197 | 185 | 189 | 159 | 209 | 102 |
| 63  | 47  | 80  | 66  | 85  | 87  | 83  | 96  | 101 | 71  |
| 53  | 60  | 63  | 81  | 121 | 91  | 101 | 94  | 112 | 64  |
| 68  | 70  | 58  | 51  | 58  | 42  | 64  | 58  | 54  | 45  |
| 88  | 60  | 86  | 71  | 85  | 68  | 61  | 66  | 78  | 67  |
| 49  | 45  | 37  | 55  | 68  | 72  | 61  | 57  | 65  | 49  |
| 60  | 51  | 45  | 58  | 60  | 46  | 46  | 56  | 62  | 35  |
| 93  | 86  | 104 | 92  | 123 | 93  | 103 | 107 | 95  | 69  |
| 56  | 61  | 53  | 95  | 125 | 92  | 107 | 102 | 118 | 66  |
| 55  | 54  | 48  | 50  | 50  | 47  | 44  | 45  | 55  | 49  |
| 58  | 52  | 62  | 43  | 47  | 42  | 45  | 52  | 52  | 44  |

|     |     |     |     |     |     |     |     |     |    |
|-----|-----|-----|-----|-----|-----|-----|-----|-----|----|
| 37  | 33  | 47  | 50  | 87  | 69  | 59  | 63  | 51  | 38 |
| 13  | 18  | 10  | 11  | 16  | 19  | 20  | 17  | 10  | 16 |
| 30  | 25  | 31  | 84  | 120 | 87  | 81  | 73  | 99  | 53 |
| 14  | 12  | 19  | 25  | 31  | 25  | 18  | 24  | 23  | 18 |
| 47  | 49  | 37  | 75  | 99  | 85  | 68  | 69  | 78  | 47 |
| 28  | 42  | 48  | 49  | 65  | 58  | 61  | 40  | 53  | 46 |
| 18  | 13  | 14  | 7   | 10  | 14  | 12  | 9   | 12  | 8  |
| 30  | 33  | 29  | 99  | 126 | 110 | 103 | 92  | 101 | 45 |
| 30  | 26  | 28  | 99  | 119 | 87  | 66  | 60  | 63  | 26 |
| 16  | 17  | 18  | 5   | 13  | 14  | 9   | 17  | 11  | 7  |
| 35  | 35  | 30  | 41  | 52  | 25  | 27  | 22  | 29  | 23 |
| 34  | 20  | 24  | 16  | 19  | 17  | 12  | 15  | 18  | 17 |
| 27  | 33  | 32  | 20  | 24  | 24  | 21  | 17  | 19  | 30 |
| 29  | 34  | 46  | 65  | 62  | 70  | 58  | 57  | 57  | 39 |
| 22  | 19  | 26  | 20  | 21  | 18  | 28  | 28  | 18  | 18 |
| 44  | 40  | 40  | 39  | 50  | 49  | 49  | 41  | 43  | 27 |
| 41  | 32  | 33  | 65  | 74  | 63  | 45  | 37  | 35  | 37 |
| 50  | 29  | 36  | 53  | 62  | 45  | 46  | 38  | 45  | 37 |
| 45  | 48  | 53  | 66  | 78  | 78  | 67  | 75  | 69  | 58 |
| 21  | 19  | 18  | 21  | 31  | 30  | 29  | 13  | 17  | 19 |
| 28  | 29  | 23  | 19  | 22  | 22  | 25  | 42  | 33  | 31 |
| 37  | 41  | 49  | 111 | 148 | 126 | 105 | 89  | 80  | 46 |
| 19  | 21  | 18  | 30  | 36  | 25  | 21  | 12  | 18  | 12 |
| 39  | 43  | 35  | 62  | 81  | 58  | 69  | 74  | 73  | 39 |
| 57  | 69  | 78  | 94  | 83  | 94  | 80  | 113 | 87  | 58 |
| 24  | 22  | 32  | 62  | 89  | 87  | 87  | 65  | 64  | 47 |
| 36  | 19  | 36  | 173 | 246 | 183 | 149 | 149 | 132 | 61 |
| 48  | 41  | 48  | 78  | 103 | 81  | 81  | 71  | 74  | 57 |
| 46  | 36  | 37  | 103 | 125 | 96  | 77  | 72  | 86  | 49 |
| 27  | 26  | 29  | 84  | 92  | 73  | 55  | 49  | 37  | 33 |
| 35  | 37  | 39  | 125 | 150 | 132 | 144 | 113 | 119 | 83 |
| 63  | 67  | 69  | 150 | 174 | 137 | 89  | 71  | 74  | 63 |
| 14  | 14  | 17  | 24  | 20  | 16  | 15  | 15  | 18  | 11 |
| 42  | 52  | 56  | 124 | 152 | 116 | 106 | 86  | 85  | 60 |
| 66  | 55  | 61  | 92  | 140 | 106 | 75  | 85  | 88  | 72 |
| 27  | 35  | 40  | 110 | 121 | 121 | 99  | 64  | 76  | 39 |
| 21  | 20  | 34  | 133 | 218 | 160 | 131 | 105 | 134 | 66 |
| 32  | 28  | 32  | 50  | 44  | 53  | 52  | 45  | 47  | 41 |
| 18  | 24  | 29  | 35  | 34  | 41  | 35  | 28  | 32  | 29 |
| 55  | 61  | 62  | 70  | 97  | 61  | 126 | 114 | 129 | 78 |
| 121 | 103 | 121 | 89  | 107 | 94  | 107 | 90  | 113 | 57 |

|     |     |     |     |     |     |     |     |     |     |
|-----|-----|-----|-----|-----|-----|-----|-----|-----|-----|
| 8   | 15  | 11  | 25  | 18  | 18  | 17  | 23  | 35  | 16  |
| 11  | 12  | 17  | 30  | 43  | 31  | 45  | 30  | 39  | 18  |
| 51  | 36  | 56  | 50  | 59  | 58  | 46  | 29  | 30  | 21  |
| 47  | 42  | 54  | 65  | 72  | 83  | 69  | 47  | 80  | 41  |
| 19  | 19  | 32  | 23  | 23  | 25  | 8   | 9   | 8   | 13  |
| 15  | 10  | 16  | 43  | 53  | 51  | 61  | 45  | 53  | 27  |
| 46  | 57  | 65  | 116 | 142 | 122 | 110 | 108 | 119 | 56  |
| 37  | 43  | 47  | 130 | 198 | 157 | 116 | 117 | 118 | 62  |
| 66  | 60  | 59  | 160 | 197 | 181 | 168 | 144 | 153 | 77  |
| 30  | 32  | 34  | 43  | 57  | 55  | 57  | 32  | 32  | 27  |
| 18  | 23  | 22  | 41  | 47  | 50  | 32  | 38  | 27  | 28  |
| 48  | 35  | 29  | 24  | 45  | 46  | 33  | 36  | 34  | 38  |
| 51  | 28  | 46  | 68  | 76  | 93  | 79  | 73  | 81  | 50  |
| 35  | 27  | 31  | 28  | 50  | 32  | 32  | 37  | 28  | 36  |
| 54  | 51  | 73  | 81  | 125 | 117 | 112 | 93  | 100 | 67  |
| 63  | 60  | 60  | 101 | 135 | 107 | 126 | 77  | 112 | 61  |
| 24  | 23  | 21  | 51  | 85  | 69  | 28  | 29  | 34  | 25  |
| 41  | 35  | 42  | 63  | 104 | 83  | 58  | 48  | 47  | 27  |
| 40  | 48  | 45  | 68  | 75  | 69  | 42  | 54  | 51  | 54  |
| 94  | 85  | 94  | 123 | 166 | 139 | 190 | 168 | 189 | 104 |
| 88  | 76  | 89  | 119 | 130 | 111 | 142 | 131 | 156 | 93  |
| 75  | 73  | 79  | 97  | 113 | 102 | 127 | 128 | 143 | 90  |
| 11  | 9   | 13  | 5   | 3   | 9   | 3   | 3   | 10  | 7   |
| 87  | 81  | 68  | 60  | 86  | 89  | 132 | 117 | 112 | 80  |
| 75  | 63  | 72  | 87  | 111 | 107 | 113 | 98  | 108 | 71  |
| 42  | 37  | 40  | 39  | 65  | 55  | 57  | 46  | 57  | 50  |
| 40  | 42  | 34  | 48  | 58  | 53  | 65  | 54  | 57  | 45  |
| 46  | 40  | 51  | 41  | 40  | 51  | 27  | 35  | 37  | 41  |
| 29  | 20  | 34  | 24  | 38  | 32  | 30  | 27  | 25  | 20  |
| 112 | 111 | 147 | 140 | 194 | 165 | 180 | 158 | 179 | 133 |
| 44  | 70  | 58  | 85  | 111 | 87  | 116 | 101 | 122 | 61  |
| 85  | 63  | 71  | 64  | 71  | 57  | 53  | 52  | 66  | 58  |
| 22  | 34  | 31  | 23  | 32  | 28  | 24  | 30  | 39  | 27  |
| 135 | 122 | 132 | 110 | 155 | 172 | 190 | 147 | 173 | 126 |
| 148 | 149 | 183 | 118 | 168 | 135 | 182 | 148 | 176 | 141 |
| 37  | 34  | 50  | 151 | 220 | 161 | 197 | 187 | 191 | 80  |
| 41  | 41  | 38  | 62  | 120 | 78  | 137 | 120 | 120 | 53  |
| 34  | 33  | 43  | 54  | 82  | 56  | 69  | 50  | 65  | 31  |
| 55  | 43  | 66  | 114 | 162 | 144 | 163 | 142 | 150 | 96  |
| 54  | 77  | 58  | 96  | 110 | 93  | 125 | 88  | 118 | 72  |
| 36  | 39  | 32  | 78  | 89  | 83  | 41  | 38  | 53  | 39  |

|    |    |    |     |     |     |     |     |     |     |
|----|----|----|-----|-----|-----|-----|-----|-----|-----|
| 56 | 61 | 58 | 92  | 124 | 94  | 39  | 39  | 40  | 37  |
| 31 | 23 | 21 | 55  | 85  | 64  | 36  | 32  | 24  | 22  |
| 30 | 24 | 27 | 76  | 111 | 81  | 50  | 45  | 53  | 33  |
| 48 | 50 | 28 | 172 | 239 | 205 | 121 | 121 | 133 | 71  |
| 23 | 26 | 30 | 49  | 71  | 59  | 66  | 48  | 61  | 33  |
| 4  | 12 | 15 | 6   | 4   | 7   | 4   | 8   | 0   | 7   |
| 47 | 40 | 35 | 35  | 35  | 41  | 39  | 33  | 28  | 37  |
| 56 | 61 | 70 | 108 | 138 | 114 | 87  | 83  | 79  | 68  |
| 42 | 34 | 49 | 61  | 41  | 59  | 42  | 53  | 53  | 51  |
| 50 | 52 | 56 | 133 | 129 | 104 | 70  | 102 | 82  | 53  |
| 51 | 46 | 46 | 34  | 52  | 35  | 34  | 47  | 45  | 38  |
| 41 | 41 | 36 | 31  | 43  | 35  | 26  | 24  | 29  | 42  |
| 35 | 40 | 34 | 88  | 108 | 92  | 70  | 41  | 69  | 38  |
| 29 | 29 | 36 | 23  | 29  | 27  | 16  | 20  | 23  | 26  |
| 70 | 81 | 75 | 194 | 245 | 219 | 184 | 168 | 176 | 113 |
| 33 | 30 | 39 | 28  | 25  | 28  | 18  | 18  | 27  | 15  |
| 48 | 45 | 56 | 97  | 117 | 99  | 114 | 96  | 103 | 46  |
| 55 | 51 | 52 | 223 | 287 | 216 | 213 | 189 | 192 | 102 |
| 33 | 28 | 40 | 111 | 139 | 151 | 113 | 110 | 126 | 58  |
| 40 | 34 | 50 | 153 | 141 | 130 | 191 | 163 | 187 | 76  |
| 37 | 29 | 34 | 177 | 200 | 181 | 155 | 141 | 159 | 72  |
| 49 | 59 | 55 | 65  | 57  | 62  | 68  | 52  | 81  | 50  |
| 40 | 49 | 60 | 71  | 96  | 90  | 96  | 99  | 94  | 62  |
| 12 | 5  | 16 | 45  | 63  | 56  | 31  | 23  | 42  | 24  |
| 9  | 7  | 5  | 64  | 66  | 47  | 73  | 66  | 68  | 41  |
| 11 | 12 | 23 | 19  | 19  | 23  | 24  | 17  | 34  | 30  |
| 15 | 13 | 26 | 35  | 46  | 43  | 37  | 37  | 28  | 18  |
| 70 | 59 | 92 | 159 | 211 | 136 | 191 | 147 | 160 | 122 |
| 15 | 7  | 14 | 42  | 37  | 22  | 18  | 16  | 24  | 12  |
| 6  | 6  | 11 | 18  | 27  | 28  | 38  | 25  | 21  | 9   |
| 24 | 22 | 22 | 20  | 15  | 22  | 30  | 29  | 20  | 30  |
| 14 | 10 | 13 | 15  | 28  | 18  | 23  | 19  | 21  | 13  |
| 16 | 19 | 19 | 71  | 89  | 80  | 125 | 100 | 131 | 57  |
| 31 | 29 | 23 | 34  | 47  | 57  | 29  | 36  | 36  | 23  |
| 70 | 71 | 76 | 93  | 90  | 76  | 66  | 84  | 58  | 47  |
| 49 | 36 | 37 | 34  | 69  | 51  | 56  | 60  | 61  | 31  |
| 44 | 58 | 64 | 42  | 74  | 70  | 75  | 49  | 50  | 45  |
| 38 | 19 | 35 | 52  | 67  | 48  | 55  | 40  | 52  | 28  |
| 24 | 23 | 43 | 49  | 60  | 51  | 50  | 53  | 46  | 26  |
| 21 | 17 | 19 | 59  | 113 | 74  | 52  | 38  | 40  | 26  |
| 26 | 24 | 27 | 69  | 94  | 66  | 38  | 37  | 40  | 20  |

|    |    |     |     |     |     |     |     |     |     |
|----|----|-----|-----|-----|-----|-----|-----|-----|-----|
| 50 | 30 | 34  | 58  | 71  | 71  | 117 | 83  | 112 | 50  |
| 30 | 42 | 46  | 46  | 61  | 60  | 61  | 55  | 53  | 36  |
| 35 | 37 | 41  | 62  | 80  | 66  | 52  | 48  | 81  | 35  |
| 30 | 24 | 29  | 81  | 108 | 89  | 77  | 74  | 83  | 45  |
| 70 | 58 | 80  | 112 | 131 | 133 | 110 | 114 | 121 | 76  |
| 15 | 10 | 21  | 11  | 13  | 17  | 24  | 38  | 25  | 28  |
| 38 | 29 | 31  | 40  | 45  | 44  | 28  | 37  | 37  | 18  |
| 32 | 26 | 22  | 19  | 29  | 30  | 33  | 31  | 32  | 31  |
| 48 | 44 | 51  | 101 | 113 | 132 | 115 | 118 | 141 | 70  |
| 34 | 26 | 47  | 138 | 167 | 142 | 165 | 144 | 168 | 79  |
| 62 | 57 | 46  | 73  | 93  | 79  | 63  | 80  | 82  | 65  |
| 40 | 38 | 29  | 48  | 74  | 60  | 55  | 49  | 53  | 28  |
| 23 | 25 | 24  | 56  | 63  | 44  | 50  | 40  | 54  | 32  |
| 31 | 29 | 32  | 33  | 34  | 40  | 32  | 19  | 34  | 19  |
| 34 | 45 | 31  | 39  | 46  | 50  | 32  | 40  | 38  | 34  |
| 50 | 58 | 69  | 55  | 66  | 47  | 57  | 45  | 59  | 45  |
| 45 | 42 | 39  | 52  | 84  | 61  | 72  | 50  | 70  | 52  |
| 23 | 26 | 31  | 24  | 40  | 21  | 27  | 15  | 30  | 28  |
| 39 | 43 | 39  | 38  | 49  | 50  | 41  | 35  | 35  | 42  |
| 35 | 35 | 45  | 112 | 151 | 118 | 74  | 43  | 55  | 42  |
| 12 | 16 | 12  | 29  | 32  | 30  | 35  | 20  | 31  | 12  |
| 47 | 52 | 45  | 63  | 62  | 54  | 62  | 56  | 69  | 37  |
| 22 | 19 | 23  | 27  | 35  | 37  | 28  | 37  | 36  | 19  |
| 44 | 68 | 60  | 63  | 92  | 68  | 60  | 56  | 73  | 37  |
| 46 | 42 | 40  | 31  | 45  | 27  | 42  | 45  | 36  | 41  |
| 48 | 47 | 61  | 56  | 61  | 59  | 51  | 46  | 53  | 42  |
| 48 | 36 | 42  | 65  | 92  | 73  | 87  | 79  | 91  | 36  |
| 8  | 11 | 12  | 21  | 24  | 14  | 19  | 12  | 12  | 11  |
| 64 | 57 | 57  | 78  | 94  | 80  | 79  | 82  | 90  | 53  |
| 24 | 18 | 28  | 37  | 58  | 50  | 54  | 53  | 62  | 48  |
| 47 | 41 | 46  | 31  | 45  | 42  | 27  | 31  | 28  | 26  |
| 17 | 20 | 29  | 15  | 17  | 27  | 32  | 28  | 29  | 19  |
| 28 | 27 | 26  | 103 | 121 | 96  | 106 | 87  | 91  | 52  |
| 21 | 24 | 12  | 23  | 28  | 28  | 25  | 20  | 30  | 12  |
| 16 | 21 | 39  | 35  | 46  | 40  | 39  | 31  | 42  | 25  |
| 42 | 40 | 50  | 158 | 181 | 156 | 149 | 115 | 148 | 71  |
| 43 | 44 | 54  | 113 | 151 | 134 | 138 | 169 | 144 | 60  |
| 79 | 99 | 105 | 75  | 76  | 69  | 82  | 84  | 67  | 59  |
| 61 | 68 | 67  | 401 | 490 | 480 | 391 | 367 | 376 | 193 |
| 27 | 21 | 24  | 33  | 44  | 45  | 37  | 44  | 28  | 34  |
| 37 | 30 | 49  | 93  | 125 | 107 | 113 | 109 | 115 | 56  |

|     |     |     |     |     |     |     |     |     |     |
|-----|-----|-----|-----|-----|-----|-----|-----|-----|-----|
| 60  | 48  | 56  | 44  | 43  | 45  | 39  | 32  | 37  | 34  |
| 13  | 23  | 24  | 20  | 20  | 14  | 20  | 19  | 15  | 18  |
| 36  | 39  | 41  | 64  | 91  | 73  | 65  | 51  | 58  | 47  |
| 47  | 38  | 36  | 45  | 30  | 51  | 46  | 34  | 39  | 35  |
| 45  | 40  | 46  | 42  | 57  | 55  | 50  | 45  | 47  | 34  |
| 42  | 39  | 56  | 26  | 44  | 31  | 35  | 37  | 32  | 33  |
| 77  | 73  | 102 | 70  | 106 | 110 | 94  | 71  | 81  | 73  |
| 64  | 49  | 61  | 83  | 79  | 87  | 106 | 97  | 112 | 70  |
| 55  | 56  | 57  | 59  | 75  | 73  | 64  | 65  | 75  | 57  |
| 46  | 47  | 53  | 60  | 63  | 74  | 62  | 49  | 62  | 45  |
| 165 | 177 | 168 | 164 | 185 | 137 | 231 | 198 | 204 | 162 |
| 66  | 59  | 71  | 64  | 68  | 71  | 56  | 50  | 64  | 60  |
| 30  | 38  | 40  | 39  | 62  | 38  | 29  | 25  | 27  | 27  |
| 33  | 43  | 33  | 46  | 56  | 44  | 46  | 38  | 30  | 33  |
| 41  | 54  | 47  | 80  | 100 | 90  | 68  | 60  | 63  | 39  |
| 39  | 47  | 43  | 46  | 58  | 61  | 61  | 48  | 52  | 43  |
| 37  | 34  | 41  | 44  | 66  | 62  | 56  | 38  | 52  | 32  |
| 39  | 25  | 30  | 39  | 57  | 56  | 42  | 48  | 53  | 27  |
| 26  | 36  | 40  | 59  | 63  | 60  | 70  | 58  | 60  | 39  |
| 25  | 25  | 30  | 42  | 43  | 38  | 35  | 39  | 35  | 16  |
| 18  | 21  | 27  | 56  | 62  | 49  | 37  | 30  | 42  | 24  |
| 10  | 8   | 7   | 25  | 29  | 18  | 13  | 17  | 23  | 15  |
| 42  | 43  | 54  | 97  | 113 | 84  | 89  | 80  | 77  | 47  |
| 29  | 30  | 30  | 29  | 58  | 32  | 46  | 41  | 36  | 26  |
| 31  | 32  | 41  | 29  | 63  | 49  | 33  | 41  | 26  | 36  |
| 35  | 39  | 43  | 49  | 67  | 61  | 72  | 60  | 47  | 38  |
| 67  | 45  | 59  | 158 | 195 | 196 | 224 | 177 | 213 | 98  |
| 65  | 53  | 68  | 134 | 135 | 100 | 118 | 99  | 94  | 53  |
| 111 | 103 | 149 | 246 | 317 | 325 | 206 | 219 | 253 | 135 |
| 76  | 122 | 97  | 157 | 178 | 193 | 136 | 105 | 165 | 87  |
| 153 | 157 | 192 | 111 | 144 | 136 | 108 | 96  | 112 | 71  |
| 95  | 107 | 87  | 70  | 98  | 88  | 80  | 67  | 76  | 53  |
| 111 | 107 | 129 | 65  | 74  | 71  | 68  | 80  | 94  | 78  |
| 13  | 33  | 21  | 19  | 13  | 15  | 20  | 13  | 23  | 17  |
| 33  | 43  | 62  | 88  | 136 | 91  | 106 | 85  | 112 | 62  |
| 72  | 94  | 88  | 84  | 112 | 118 | 91  | 85  | 102 | 70  |
| 102 | 106 | 116 | 110 | 126 | 131 | 137 | 116 | 120 | 86  |
| 23  | 31  | 23  | 22  | 22  | 28  | 33  | 25  | 33  | 22  |
| 45  | 42  | 44  | 54  | 66  | 53  | 57  | 56  | 58  | 40  |
| 68  | 65  | 56  | 86  | 108 | 99  | 111 | 100 | 117 | 48  |
| 47  | 50  | 59  | 102 | 117 | 116 | 97  | 79  | 102 | 56  |

|    |    |     |     |     |     |     |     |     |    |
|----|----|-----|-----|-----|-----|-----|-----|-----|----|
| 28 | 37 | 33  | 37  | 39  | 47  | 35  | 33  | 24  | 24 |
| 21 | 23 | 29  | 25  | 31  | 24  | 21  | 21  | 31  | 18 |
| 55 | 49 | 52  | 55  | 72  | 60  | 84  | 66  | 76  | 59 |
| 29 | 29 | 32  | 39  | 53  | 58  | 35  | 45  | 47  | 36 |
| 27 | 33 | 38  | 24  | 39  | 37  | 37  | 34  | 33  | 27 |
| 55 | 72 | 63  | 118 | 134 | 131 | 110 | 95  | 115 | 86 |
| 6  | 12 | 14  | 21  | 31  | 34  | 19  | 21  | 17  | 18 |
| 48 | 42 | 52  | 73  | 107 | 98  | 66  | 74  | 68  | 47 |
| 33 | 38 | 48  | 51  | 52  | 35  | 34  | 42  | 38  | 37 |
| 38 | 43 | 44  | 62  | 63  | 60  | 47  | 36  | 53  | 41 |
| 32 | 31 | 52  | 27  | 42  | 26  | 41  | 34  | 31  | 28 |
| 64 | 51 | 54  | 51  | 82  | 63  | 74  | 47  | 64  | 49 |
| 23 | 22 | 21  | 15  | 11  | 10  | 8   | 7   | 9   | 20 |
| 32 | 31 | 34  | 19  | 36  | 40  | 27  | 29  | 28  | 28 |
| 13 | 10 | 1   | 6   | 7   | 9   | 4   | 6   | 10  | 7  |
| 31 | 35 | 35  | 99  | 111 | 85  | 150 | 101 | 127 | 63 |
| 22 | 23 | 23  | 26  | 29  | 28  | 24  | 17  | 30  | 16 |
| 12 | 8  | 13  | 9   | 9   | 7   | 4   | 10  | 6   | 12 |
| 16 | 10 | 13  | 11  | 10  | 9   | 12  | 13  | 9   | 11 |
| 19 | 21 | 12  | 9   | 12  | 8   | 9   | 14  | 9   | 18 |
| 15 | 28 | 28  | 14  | 12  | 15  | 11  | 9   | 6   | 11 |
| 17 | 17 | 28  | 17  | 19  | 18  | 35  | 11  | 18  | 14 |
| 11 | 11 | 12  | 12  | 24  | 16  | 30  | 20  | 30  | 16 |
| 21 | 31 | 23  | 22  | 35  | 19  | 29  | 20  | 25  | 21 |
| 37 | 48 | 41  | 25  | 29  | 31  | 41  | 34  | 48  | 41 |
| 26 | 41 | 56  | 31  | 37  | 21  | 56  | 41  | 54  | 42 |
| 97 | 84 | 117 | 76  | 85  | 117 | 92  | 87  | 97  | 56 |
| 48 | 54 | 45  | 38  | 46  | 31  | 40  | 44  | 33  | 39 |
| 24 | 20 | 25  | 18  | 26  | 22  | 33  | 29  | 29  | 19 |
| 21 | 24 | 12  | 11  | 7   | 6   | 11  | 11  | 9   | 11 |
| 51 | 50 | 44  | 84  | 113 | 88  | 56  | 68  | 76  | 60 |
| 51 | 57 | 58  | 96  | 153 | 121 | 90  | 104 | 101 | 58 |
| 42 | 36 | 50  | 42  | 43  | 49  | 47  | 51  | 44  | 28 |
| 17 | 23 | 18  | 14  | 23  | 20  | 26  | 27  | 22  | 9  |
| 29 | 29 | 34  | 24  | 37  | 33  | 33  | 22  | 26  | 23 |
| 58 | 58 | 57  | 65  | 69  | 56  | 101 | 110 | 77  | 65 |
| 56 | 56 | 60  | 19  | 33  | 31  | 35  | 39  | 45  | 47 |
| 41 | 46 | 33  | 40  | 55  | 50  | 68  | 66  | 63  | 43 |
| 43 | 38 | 48  | 51  | 47  | 56  | 55  | 59  | 59  | 50 |
| 14 | 7  | 11  | 15  | 18  | 15  | 21  | 33  | 21  | 11 |
| 52 | 53 | 51  | 110 | 149 | 145 | 111 | 106 | 132 | 59 |



|     |     |     |     |     |     |     |     |     |    |
|-----|-----|-----|-----|-----|-----|-----|-----|-----|----|
| 37  | 32  | 44  | 62  | 61  | 84  | 56  | 39  | 54  | 53 |
| 49  | 39  | 33  | 43  | 47  | 33  | 46  | 43  | 47  | 33 |
| 39  | 57  | 40  | 82  | 105 | 98  | 67  | 61  | 56  | 48 |
| 40  | 34  | 42  | 49  | 67  | 59  | 60  | 59  | 55  | 42 |
| 57  | 49  | 69  | 60  | 64  | 58  | 81  | 69  | 92  | 54 |
| 78  | 74  | 85  | 125 | 153 | 155 | 163 | 150 | 152 | 99 |
| 100 | 107 | 109 | 53  | 55  | 56  | 42  | 37  | 56  | 26 |
| 53  | 59  | 63  | 27  | 38  | 30  | 43  | 34  | 27  | 31 |
| 127 | 132 | 115 | 91  | 108 | 102 | 97  | 89  | 110 | 81 |
| 101 | 87  | 106 | 37  | 45  | 32  | 76  | 58  | 58  | 42 |
| 24  | 25  | 21  | 39  | 65  | 37  | 34  | 43  | 48  | 27 |
| 30  | 29  | 33  | 39  | 64  | 46  | 57  | 37  | 56  | 40 |
| 81  | 84  | 100 | 214 | 276 | 227 | 173 | 178 | 196 | 99 |
| 33  | 28  | 34  | 48  | 47  | 35  | 43  | 42  | 35  | 35 |
| 22  | 19  | 28  | 23  | 53  | 27  | 29  | 35  | 34  | 23 |
| 32  | 29  | 33  | 63  | 87  | 80  | 53  | 48  | 44  | 32 |
| 12  | 11  | 15  | 25  | 29  | 23  | 26  | 30  | 34  | 5  |
| 50  | 37  | 42  | 62  | 67  | 55  | 54  | 68  | 54  | 48 |
| 16  | 15  | 19  | 34  | 32  | 31  | 27  | 21  | 20  | 21 |
| 19  | 35  | 27  | 58  | 68  | 63  | 45  | 34  | 38  | 30 |
| 7   | 8   | 5   | 21  | 28  | 24  | 3   | 7   | 9   | 4  |
| 40  | 20  | 43  | 74  | 129 | 85  | 76  | 58  | 50  | 28 |
| 27  | 46  | 50  | 20  | 29  | 21  | 16  | 22  | 23  | 35 |
| 31  | 33  | 43  | 23  | 37  | 38  | 26  | 26  | 32  | 43 |
| 53  | 62  | 65  | 54  | 59  | 62  | 46  | 43  | 59  | 43 |
| 32  | 27  | 34  | 25  | 36  | 29  | 30  | 22  | 41  | 28 |
| 28  | 27  | 32  | 28  | 20  | 27  | 35  | 23  | 34  | 35 |
| 39  | 64  | 58  | 83  | 121 | 98  | 62  | 71  | 104 | 57 |
| 49  | 73  | 91  | 180 | 253 | 221 | 222 | 200 | 189 | 92 |
| 50  | 47  | 52  | 40  | 63  | 61  | 49  | 50  | 54  | 48 |
| 39  | 41  | 53  | 37  | 42  | 55  | 37  | 40  | 38  | 41 |
| 60  | 56  | 76  | 65  | 63  | 63  | 81  | 65  | 78  | 71 |
| 25  | 24  | 24  | 26  | 23  | 29  | 26  | 17  | 19  | 18 |
| 40  | 53  | 57  | 48  | 102 | 83  | 62  | 71  | 86  | 60 |
| 47  | 43  | 55  | 47  | 55  | 58  | 29  | 40  | 48  | 37 |
| 60  | 62  | 54  | 46  | 60  | 49  | 43  | 49  | 59  | 40 |
| 24  | 37  | 29  | 26  | 39  | 30  | 35  | 27  | 32  | 28 |
| 62  | 64  | 70  | 183 | 215 | 200 | 183 | 157 | 177 | 74 |
| 48  | 39  | 60  | 39  | 43  | 51  | 54  | 29  | 47  | 38 |
| 83  | 78  | 87  | 106 | 92  | 106 | 97  | 79  | 84  | 71 |
| 31  | 27  | 34  | 36  | 38  | 31  | 42  | 41  | 43  | 21 |

|     |     |     |     |     |     |     |     |     |     |
|-----|-----|-----|-----|-----|-----|-----|-----|-----|-----|
| 47  | 41  | 37  | 38  | 46  | 52  | 34  | 26  | 42  | 32  |
| 60  | 57  | 65  | 53  | 51  | 59  | 42  | 40  | 53  | 60  |
| 108 | 94  | 109 | 155 | 176 | 162 | 364 | 342 | 356 | 169 |
| 59  | 58  | 53  | 52  | 45  | 76  | 73  | 54  | 76  | 61  |
| 163 | 144 | 176 | 133 | 182 | 162 | 160 | 135 | 170 | 159 |
| 75  | 57  | 62  | 105 | 104 | 106 | 162 | 123 | 124 | 76  |
| 115 | 96  | 99  | 88  | 109 | 90  | 96  | 87  | 107 | 96  |
| 51  | 64  | 72  | 45  | 38  | 41  | 63  | 47  | 52  | 47  |
| 41  | 55  | 60  | 44  | 38  | 47  | 47  | 33  | 39  | 44  |
| 6   | 2   | 6   | 1   | 4   | 1   | 2   | 6   | 1   | 3   |
| 90  | 85  | 86  | 53  | 72  | 57  | 59  | 59  | 56  | 59  |
| 3   | 5   | 7   | 2   | 4   | 2   | 5   | 1   | 0   | 4   |
| 93  | 106 | 113 | 76  | 79  | 83  | 78  | 83  | 86  | 81  |
| 32  | 32  | 34  | 47  | 53  | 34  | 27  | 21  | 30  | 37  |
| 136 | 122 | 164 | 72  | 68  | 77  | 94  | 80  | 98  | 111 |
| 65  | 60  | 78  | 153 | 194 | 169 | 165 | 136 | 167 | 72  |
| 61  | 69  | 68  | 109 | 110 | 132 | 132 | 127 | 118 | 70  |
| 52  | 51  | 47  | 190 | 236 | 216 | 201 | 181 | 184 | 96  |
| 17  | 31  | 22  | 52  | 61  | 60  | 79  | 48  | 60  | 35  |
| 40  | 35  | 40  | 55  | 85  | 74  | 76  | 50  | 74  | 46  |
| 8   | 12  | 13  | 9   | 12  | 12  | 10  | 13  | 7   | 6   |
| 18  | 19  | 14  | 22  | 25  | 31  | 24  | 16  | 24  | 11  |
| 20  | 19  | 33  | 24  | 27  | 31  | 27  | 33  | 27  | 26  |
| 13  | 28  | 15  | 18  | 17  | 20  | 19  | 10  | 13  | 17  |
| 27  | 39  | 44  | 28  | 48  | 26  | 37  | 31  | 29  | 32  |
| 52  | 52  | 47  | 47  | 56  | 50  | 64  | 53  | 63  | 49  |
| 74  | 73  | 43  | 41  | 60  | 50  | 55  | 42  | 50  | 41  |
| 26  | 22  | 38  | 55  | 46  | 54  | 56  | 61  | 51  | 39  |
| 45  | 53  | 43  | 78  | 102 | 75  | 68  | 56  | 57  | 50  |
| 31  | 49  | 42  | 44  | 50  | 51  | 44  | 47  | 53  | 35  |
| 29  | 29  | 34  | 66  | 68  | 71  | 60  | 46  | 53  | 36  |
| 47  | 46  | 61  | 63  | 72  | 66  | 46  | 42  | 33  | 44  |
| 35  | 47  | 32  | 62  | 83  | 74  | 88  | 57  | 74  | 43  |
| 39  | 45  | 38  | 43  | 47  | 55  | 43  | 47  | 35  | 40  |
| 37  | 38  | 33  | 49  | 49  | 56  | 72  | 78  | 74  | 42  |
| 52  | 42  | 66  | 48  | 61  | 69  | 42  | 50  | 70  | 34  |
| 37  | 44  | 50  | 71  | 82  | 67  | 43  | 36  | 48  | 42  |
| 38  | 41  | 46  | 70  | 102 | 121 | 78  | 73  | 89  | 42  |
| 27  | 32  | 23  | 21  | 21  | 25  | 31  | 25  | 29  | 26  |
| 32  | 32  | 31  | 23  | 26  | 16  | 22  | 19  | 13  | 23  |
| 56  | 48  | 60  | 60  | 86  | 62  | 54  | 47  | 66  | 30  |

|     |    |     |     |     |     |     |     |     |     |
|-----|----|-----|-----|-----|-----|-----|-----|-----|-----|
| 50  | 63 | 56  | 56  | 60  | 85  | 79  | 73  | 65  | 39  |
| 74  | 68 | 84  | 76  | 89  | 63  | 99  | 106 | 101 | 85  |
| 14  | 29 | 13  | 27  | 34  | 15  | 30  | 28  | 29  | 23  |
| 37  | 40 | 32  | 96  | 117 | 101 | 82  | 88  | 88  | 51  |
| 56  | 45 | 52  | 107 | 127 | 113 | 110 | 111 | 106 | 54  |
| 33  | 46 | 51  | 67  | 99  | 77  | 80  | 81  | 68  | 60  |
| 68  | 79 | 80  | 237 | 278 | 270 | 217 | 216 | 224 | 104 |
| 74  | 76 | 91  | 232 | 315 | 247 | 264 | 195 | 254 | 160 |
| 19  | 32 | 19  | 29  | 32  | 44  | 31  | 28  | 23  | 24  |
| 57  | 62 | 59  | 95  | 116 | 102 | 91  | 89  | 93  | 63  |
| 74  | 72 | 77  | 92  | 77  | 97  | 52  | 55  | 76  | 46  |
| 49  | 58 | 60  | 66  | 83  | 69  | 72  | 69  | 78  | 41  |
| 33  | 30 | 34  | 87  | 131 | 105 | 107 | 79  | 80  | 38  |
| 57  | 59 | 75  | 207 | 279 | 212 | 185 | 187 | 230 | 98  |
| 38  | 43 | 36  | 66  | 66  | 47  | 49  | 48  | 59  | 30  |
| 50  | 55 | 49  | 57  | 77  | 61  | 51  | 51  | 50  | 40  |
| 32  | 27 | 41  | 77  | 132 | 103 | 55  | 41  | 55  | 26  |
| 39  | 55 | 57  | 75  | 79  | 75  | 62  | 59  | 63  | 33  |
| 25  | 22 | 34  | 37  | 44  | 44  | 48  | 38  | 36  | 38  |
| 65  | 61 | 57  | 161 | 206 | 214 | 258 | 206 | 247 | 112 |
| 54  | 42 | 35  | 74  | 93  | 90  | 91  | 88  | 117 | 54  |
| 68  | 47 | 66  | 81  | 110 | 104 | 92  | 86  | 114 | 60  |
| 58  | 69 | 59  | 107 | 136 | 124 | 160 | 122 | 129 | 87  |
| 35  | 27 | 30  | 40  | 48  | 38  | 57  | 50  | 56  | 24  |
| 17  | 34 | 29  | 77  | 95  | 81  | 59  | 71  | 61  | 24  |
| 43  | 27 | 36  | 35  | 34  | 39  | 35  | 42  | 42  | 27  |
| 28  | 37 | 41  | 61  | 86  | 71  | 55  | 55  | 64  | 31  |
| 25  | 25 | 36  | 119 | 155 | 138 | 118 | 113 | 134 | 64  |
| 3   | 2  | 1   | 6   | 6   | 3   | 2   | 5   | 6   | 4   |
| 17  | 17 | 19  | 27  | 22  | 18  | 32  | 17  | 14  | 13  |
| 17  | 18 | 12  | 15  | 14  | 17  | 23  | 14  | 14  | 10  |
| 13  | 12 | 24  | 19  | 16  | 21  | 30  | 12  | 32  | 13  |
| 36  | 59 | 61  | 50  | 55  | 49  | 41  | 28  | 51  | 31  |
| 47  | 53 | 65  | 54  | 83  | 53  | 58  | 63  | 53  | 36  |
| 24  | 19 | 21  | 22  | 19  | 29  | 27  | 25  | 25  | 24  |
| 45  | 37 | 51  | 25  | 48  | 42  | 48  | 43  | 38  | 35  |
| 18  | 29 | 18  | 48  | 62  | 50  | 55  | 42  | 36  | 30  |
| 82  | 73 | 85  | 151 | 200 | 178 | 143 | 137 | 153 | 108 |
| 87  | 82 | 105 | 84  | 136 | 121 | 170 | 119 | 127 | 93  |
| 102 | 81 | 118 | 197 | 219 | 218 | 291 | 269 | 296 | 149 |
| 72  | 63 | 85  | 42  | 50  | 69  | 50  | 52  | 36  | 54  |

|     |     |     |     |     |     |     |     |     |     |
|-----|-----|-----|-----|-----|-----|-----|-----|-----|-----|
| 5   | 11  | 9   | 23  | 22  | 15  | 9   | 5   | 6   | 6   |
| 11  | 12  | 11  | 57  | 62  | 40  | 22  | 13  | 19  | 7   |
| 30  | 37  | 42  | 76  | 114 | 98  | 89  | 82  | 98  | 40  |
| 34  | 21  | 42  | 55  | 71  | 64  | 47  | 42  | 57  | 50  |
| 28  | 20  | 33  | 22  | 33  | 32  | 34  | 36  | 27  | 29  |
| 73  | 56  | 70  | 51  | 65  | 59  | 70  | 50  | 67  | 69  |
| 28  | 37  | 35  | 27  | 45  | 39  | 32  | 24  | 34  | 27  |
| 6   | 14  | 5   | 26  | 21  | 15  | 27  | 26  | 38  | 9   |
| 34  | 27  | 28  | 20  | 31  | 27  | 33  | 14  | 22  | 30  |
| 52  | 46  | 45  | 110 | 145 | 125 | 97  | 84  | 108 | 67  |
| 26  | 37  | 46  | 65  | 76  | 94  | 82  | 104 | 97  | 54  |
| 81  | 77  | 67  | 83  | 99  | 84  | 85  | 105 | 104 | 78  |
| 73  | 89  | 88  | 117 | 152 | 135 | 129 | 132 | 131 | 63  |
| 43  | 45  | 62  | 100 | 127 | 115 | 114 | 100 | 119 | 54  |
| 89  | 92  | 93  | 77  | 91  | 79  | 127 | 137 | 131 | 92  |
| 28  | 37  | 33  | 60  | 53  | 52  | 140 | 91  | 102 | 60  |
| 78  | 82  | 80  | 248 | 321 | 276 | 467 | 441 | 435 | 189 |
| 74  | 75  | 80  | 42  | 48  | 51  | 69  | 80  | 98  | 76  |
| 101 | 112 | 92  | 76  | 103 | 82  | 140 | 146 | 187 | 96  |
| 44  | 49  | 45  | 52  | 72  | 69  | 104 | 87  | 93  | 47  |
| 33  | 33  | 36  | 68  | 82  | 83  | 63  | 53  | 61  | 40  |
| 57  | 65  | 79  | 67  | 85  | 105 | 80  | 95  | 79  | 57  |
| 21  | 27  | 30  | 55  | 57  | 49  | 71  | 51  | 58  | 34  |
| 1   | 0   | 1   | 1   | 0   | 1   | 1   | 0   | 1   | 0   |
| 59  | 55  | 76  | 72  | 110 | 76  | 115 | 109 | 111 | 64  |
| 23  | 15  | 28  | 26  | 38  | 40  | 27  | 23  | 26  | 27  |
| 44  | 46  | 48  | 52  | 54  | 49  | 49  | 27  | 36  | 35  |
| 38  | 32  | 29  | 46  | 56  | 54  | 44  | 31  | 37  | 29  |
| 28  | 18  | 30  | 26  | 44  | 35  | 40  | 43  | 48  | 40  |
| 24  | 24  | 28  | 29  | 41  | 45  | 43  | 33  | 42  | 20  |
| 42  | 54  | 35  | 16  | 21  | 17  | 45  | 31  | 42  | 46  |
| 50  | 40  | 45  | 38  | 40  | 48  | 48  | 59  | 38  | 46  |
| 50  | 47  | 58  | 42  | 36  | 34  | 40  | 41  | 42  | 32  |
| 47  | 54  | 63  | 39  | 66  | 59  | 46  | 50  | 53  | 42  |
| 33  | 56  | 52  | 91  | 119 | 114 | 117 | 104 | 102 | 61  |
| 73  | 69  | 70  | 50  | 73  | 59  | 52  | 52  | 65  | 52  |
| 35  | 47  | 67  | 49  | 63  | 50  | 39  | 29  | 21  | 36  |
| 60  | 59  | 66  | 75  | 72  | 50  | 47  | 52  | 60  | 41  |
| 111 | 90  | 109 | 107 | 127 | 118 | 119 | 88  | 107 | 84  |
| 10  | 16  | 15  | 23  | 35  | 26  | 18  | 29  | 23  | 15  |
| 53  | 64  | 58  | 110 | 122 | 110 | 115 | 93  | 83  | 53  |

|     |     |     |     |     |     |     |     |     |     |
|-----|-----|-----|-----|-----|-----|-----|-----|-----|-----|
| 30  | 29  | 23  | 44  | 50  | 39  | 41  | 44  | 45  | 26  |
| 64  | 59  | 51  | 38  | 60  | 44  | 60  | 50  | 60  | 52  |
| 114 | 109 | 114 | 70  | 76  | 79  | 89  | 65  | 101 | 74  |
| 36  | 43  | 39  | 43  | 75  | 47  | 56  | 52  | 45  | 39  |
| 39  | 39  | 53  | 40  | 49  | 37  | 53  | 51  | 47  | 46  |
| 24  | 18  | 21  | 40  | 46  | 31  | 21  | 23  | 35  | 21  |
| 29  | 32  | 33  | 33  | 32  | 18  | 32  | 21  | 20  | 15  |
| 37  | 39  | 45  | 39  | 48  | 38  | 23  | 32  | 40  | 23  |
| 47  | 40  | 43  | 28  | 33  | 31  | 43  | 47  | 46  | 32  |
| 110 | 114 | 111 | 81  | 112 | 86  | 105 | 84  | 112 | 102 |
| 60  | 72  | 64  | 39  | 42  | 42  | 30  | 36  | 39  | 44  |
| 50  | 42  | 56  | 36  | 63  | 39  | 31  | 31  | 26  | 45  |
| 32  | 23  | 32  | 66  | 81  | 70  | 45  | 51  | 38  | 43  |
| 35  | 40  | 46  | 100 | 120 | 129 | 134 | 118 | 144 | 54  |
| 67  | 60  | 80  | 130 | 144 | 165 | 126 | 121 | 126 | 70  |
| 57  | 32  | 41  | 109 | 135 | 115 | 128 | 123 | 115 | 57  |
| 37  | 48  | 51  | 42  | 67  | 55  | 65  | 71  | 78  | 56  |
| 71  | 66  | 86  | 223 | 275 | 294 | 285 | 267 | 287 | 110 |
| 35  | 34  | 34  | 59  | 106 | 97  | 81  | 69  | 65  | 34  |
| 34  | 29  | 35  | 68  | 86  | 75  | 72  | 73  | 82  | 45  |
| 38  | 59  | 58  | 84  | 106 | 91  | 71  | 81  | 81  | 43  |
| 57  | 48  | 62  | 99  | 129 | 110 | 135 | 122 | 142 | 80  |
| 31  | 29  | 30  | 37  | 41  | 46  | 36  | 34  | 43  | 36  |
| 38  | 41  | 58  | 49  | 77  | 71  | 61  | 48  | 71  | 45  |
| 25  | 27  | 27  | 20  | 27  | 17  | 17  | 20  | 28  | 30  |
| 55  | 47  | 47  | 55  | 63  | 51  | 40  | 30  | 39  | 31  |
| 41  | 31  | 37  | 54  | 73  | 60  | 64  | 55  | 50  | 47  |
| 82  | 99  | 108 | 73  | 76  | 88  | 73  | 72  | 96  | 80  |
| 65  | 43  | 67  | 86  | 91  | 83  | 74  | 51  | 52  | 48  |
| 36  | 29  | 35  | 76  | 91  | 91  | 78  | 70  | 68  | 59  |
| 37  | 34  | 43  | 126 | 186 | 146 | 122 | 102 | 142 | 62  |
| 36  | 33  | 35  | 138 | 191 | 168 | 145 | 146 | 150 | 81  |
| 62  | 68  | 70  | 41  | 52  | 59  | 92  | 67  | 77  | 53  |
| 20  | 9   | 19  | 13  | 9   | 6   | 13  | 5   | 19  | 10  |
| 38  | 38  | 45  | 64  | 80  | 78  | 86  | 56  | 67  | 35  |
| 48  | 50  | 56  | 89  | 113 | 81  | 125 | 115 | 137 | 52  |
| 42  | 35  | 40  | 38  | 36  | 36  | 38  | 43  | 45  | 37  |
| 26  | 19  | 22  | 54  | 78  | 56  | 58  | 36  | 43  | 38  |
| 27  | 20  | 29  | 33  | 35  | 43  | 41  | 25  | 42  | 35  |
| 38  | 42  | 32  | 57  | 94  | 81  | 64  | 53  | 73  | 52  |
| 22  | 16  | 30  | 64  | 83  | 65  | 96  | 104 | 96  | 51  |

|     |     |     |     |     |     |     |     |     |     |
|-----|-----|-----|-----|-----|-----|-----|-----|-----|-----|
| 36  | 37  | 41  | 70  | 110 | 92  | 73  | 59  | 60  | 44  |
| 94  | 80  | 77  | 22  | 40  | 43  | 64  | 78  | 56  | 44  |
| 7   | 13  | 15  | 5   | 10  | 8   | 12  | 13  | 11  | 11  |
| 12  | 20  | 19  | 42  | 61  | 50  | 71  | 69  | 70  | 30  |
| 14  | 17  | 21  | 34  | 63  | 42  | 63  | 56  | 74  | 21  |
| 28  | 35  | 38  | 42  | 46  | 42  | 56  | 68  | 44  | 24  |
| 51  | 54  | 58  | 60  | 58  | 62  | 59  | 51  | 74  | 50  |
| 18  | 15  | 10  | 9   | 13  | 15  | 16  | 13  | 25  | 15  |
| 17  | 21  | 10  | 15  | 13  | 26  | 9   | 16  | 19  | 17  |
| 34  | 34  | 42  | 15  | 26  | 21  | 19  | 23  | 35  | 18  |
| 35  | 42  | 42  | 71  | 81  | 50  | 42  | 29  | 41  | 20  |
| 35  | 24  | 23  | 18  | 29  | 24  | 28  | 44  | 36  | 18  |
| 36  | 48  | 48  | 108 | 140 | 118 | 120 | 105 | 119 | 65  |
| 23  | 32  | 33  | 54  | 36  | 41  | 44  | 30  | 36  | 32  |
| 32  | 31  | 26  | 37  | 32  | 42  | 51  | 30  | 26  | 28  |
| 8   | 3   | 5   | 1   | 2   | 0   | 0   | 3   | 2   | 7   |
| 55  | 59  | 59  | 126 | 137 | 106 | 113 | 111 | 114 | 71  |
| 11  | 13  | 14  | 36  | 38  | 33  | 26  | 35  | 33  | 27  |
| 8   | 17  | 20  | 36  | 52  | 52  | 32  | 38  | 48  | 17  |
| 26  | 33  | 35  | 49  | 50  | 28  | 36  | 40  | 41  | 26  |
| 35  | 27  | 26  | 38  | 42  | 28  | 29  | 29  | 19  | 28  |
| 19  | 24  | 27  | 45  | 43  | 57  | 70  | 78  | 83  | 30  |
| 31  | 23  | 27  | 47  | 44  | 59  | 63  | 51  | 59  | 30  |
| 65  | 47  | 64  | 121 | 139 | 139 | 138 | 141 | 153 | 70  |
| 50  | 44  | 46  | 80  | 108 | 116 | 154 | 124 | 140 | 76  |
| 34  | 34  | 41  | 55  | 48  | 47  | 47  | 37  | 56  | 33  |
| 33  | 18  | 16  | 34  | 37  | 30  | 22  | 29  | 27  | 19  |
| 65  | 71  | 70  | 127 | 159 | 145 | 142 | 170 | 151 | 85  |
| 48  | 53  | 39  | 48  | 83  | 72  | 64  | 55  | 61  | 54  |
| 30  | 28  | 34  | 22  | 35  | 24  | 38  | 30  | 32  | 25  |
| 19  | 8   | 17  | 11  | 11  | 9   | 10  | 11  | 10  | 10  |
| 30  | 27  | 30  | 26  | 21  | 22  | 24  | 21  | 16  | 18  |
| 33  | 35  | 34  | 43  | 51  | 61  | 36  | 45  | 46  | 47  |
| 17  | 9   | 8   | 27  | 41  | 33  | 16  | 11  | 11  | 10  |
| 64  | 80  | 61  | 175 | 217 | 210 | 206 | 189 | 174 | 103 |
| 26  | 22  | 25  | 131 | 169 | 192 | 214 | 168 | 203 | 94  |
| 29  | 34  | 39  | 17  | 20  | 25  | 26  | 32  | 23  | 18  |
| 111 | 103 | 106 | 63  | 77  | 76  | 95  | 100 | 91  | 72  |
| 63  | 76  | 87  | 101 | 134 | 98  | 119 | 117 | 132 | 80  |
| 30  | 32  | 42  | 121 | 173 | 116 | 90  | 90  | 93  | 41  |
| 129 | 106 | 104 | 43  | 77  | 63  | 93  | 72  | 79  | 96  |

|     |     |     |     |     |     |     |     |     |     |
|-----|-----|-----|-----|-----|-----|-----|-----|-----|-----|
| 23  | 26  | 25  | 14  | 38  | 17  | 18  | 13  | 26  | 26  |
| 44  | 44  | 65  | 180 | 196 | 177 | 118 | 111 | 115 | 76  |
| 19  | 17  | 17  | 3   | 7   | 2   | 13  | 5   | 6   | 11  |
| 20  | 29  | 20  | 10  | 12  | 11  | 7   | 11  | 7   | 15  |
| 18  | 23  | 29  | 172 | 215 | 199 | 229 | 189 | 246 | 122 |
| 29  | 29  | 42  | 59  | 78  | 81  | 66  | 48  | 47  | 27  |
| 35  | 38  | 47  | 37  | 46  | 46  | 50  | 48  | 48  | 41  |
| 46  | 62  | 59  | 178 | 239 | 201 | 248 | 212 | 239 | 103 |
| 48  | 44  | 48  | 77  | 91  | 76  | 63  | 62  | 70  | 49  |
| 33  | 60  | 37  | 38  | 56  | 45  | 46  | 44  | 48  | 23  |
| 121 | 128 | 140 | 82  | 116 | 91  | 110 | 91  | 127 | 57  |
| 34  | 28  | 36  | 32  | 34  | 27  | 28  | 11  | 16  | 26  |
| 53  | 56  | 79  | 70  | 103 | 82  | 84  | 69  | 74  | 55  |
| 43  | 31  | 35  | 42  | 35  | 26  | 27  | 14  | 19  | 10  |
| 83  | 99  | 99  | 36  | 36  | 43  | 33  | 28  | 39  | 42  |
| 24  | 21  | 28  | 32  | 42  | 31  | 26  | 25  | 30  | 16  |
| 94  | 94  | 97  | 112 | 153 | 108 | 136 | 102 | 109 | 102 |
| 59  | 59  | 57  | 75  | 79  | 71  | 76  | 67  | 70  | 43  |
| 62  | 42  | 65  | 61  | 85  | 72  | 58  | 40  | 52  | 51  |
| 82  | 90  | 71  | 37  | 41  | 24  | 74  | 70  | 91  | 78  |
| 62  | 62  | 69  | 76  | 104 | 73  | 72  | 60  | 60  | 36  |
| 71  | 70  | 74  | 72  | 105 | 93  | 50  | 48  | 61  | 56  |
| 76  | 56  | 76  | 73  | 84  | 53  | 72  | 53  | 59  | 53  |
| 32  | 41  | 60  | 40  | 44  | 46  | 38  | 34  | 43  | 26  |
| 30  | 26  | 15  | 100 | 141 | 114 | 54  | 53  | 63  | 33  |
| 51  | 74  | 62  | 81  | 116 | 93  | 67  | 54  | 87  | 62  |
| 46  | 50  | 46  | 52  | 64  | 52  | 22  | 38  | 43  | 29  |
| 16  | 17  | 20  | 10  | 7   | 8   | 2   | 2   | 7   | 12  |
| 14  | 12  | 18  | 7   | 4   | 3   | 6   | 9   | 5   | 6   |
| 64  | 68  | 77  | 86  | 123 | 91  | 107 | 100 | 99  | 77  |
| 53  | 71  | 74  | 133 | 140 | 151 | 89  | 84  | 98  | 66  |
| 44  | 51  | 58  | 39  | 58  | 58  | 45  | 37  | 54  | 49  |
| 44  | 59  | 58  | 66  | 72  | 98  | 95  | 82  | 100 | 65  |
| 44  | 34  | 28  | 22  | 30  | 20  | 35  | 25  | 30  | 39  |
| 47  | 29  | 62  | 27  | 31  | 43  | 22  | 12  | 25  | 43  |
| 52  | 60  | 60  | 49  | 70  | 61  | 66  | 52  | 44  | 54  |
| 37  | 45  | 37  | 35  | 38  | 36  | 30  | 19  | 32  | 39  |
| 48  | 65  | 74  | 45  | 39  | 29  | 42  | 48  | 42  | 60  |
| 40  | 43  | 54  | 62  | 66  | 61  | 64  | 82  | 72  | 45  |
| 58  | 51  | 50  | 15  | 13  | 15  | 26  | 29  | 25  | 39  |
| 68  | 59  | 58  | 82  | 115 | 98  | 112 | 123 | 151 | 75  |

|     |     |     |     |     |     |     |     |     |    |
|-----|-----|-----|-----|-----|-----|-----|-----|-----|----|
| 65  | 75  | 82  | 100 | 107 | 95  | 134 | 119 | 150 | 94 |
| 69  | 87  | 96  | 52  | 71  | 62  | 63  | 48  | 54  | 57 |
| 26  | 41  | 34  | 43  | 44  | 54  | 31  | 30  | 44  | 34 |
| 34  | 40  | 47  | 46  | 52  | 44  | 74  | 64  | 75  | 38 |
| 35  | 35  | 48  | 50  | 84  | 62  | 56  | 50  | 58  | 35 |
| 47  | 39  | 29  | 70  | 43  | 53  | 44  | 40  | 51  | 47 |
| 23  | 18  | 15  | 16  | 13  | 23  | 20  | 12  | 16  | 16 |
| 24  | 25  | 32  | 36  | 53  | 41  | 31  | 30  | 21  | 21 |
| 51  | 49  | 41  | 48  | 75  | 47  | 58  | 49  | 55  | 33 |
| 39  | 51  | 42  | 69  | 65  | 60  | 52  | 57  | 63  | 36 |
| 51  | 47  | 49  | 52  | 53  | 58  | 59  | 52  | 74  | 44 |
| 17  | 25  | 31  | 26  | 54  | 45  | 56  | 43  | 47  | 27 |
| 25  | 35  | 43  | 37  | 35  | 57  | 29  | 36  | 40  | 31 |
| 50  | 62  | 59  | 92  | 107 | 80  | 83  | 83  | 77  | 66 |
| 33  | 50  | 32  | 57  | 74  | 57  | 53  | 46  | 56  | 35 |
| 57  | 56  | 53  | 160 | 215 | 201 | 157 | 130 | 111 | 86 |
| 101 | 108 | 101 | 113 | 136 | 163 | 159 | 165 | 176 | 91 |
| 28  | 39  | 34  | 48  | 61  | 56  | 33  | 32  | 38  | 24 |
| 45  | 45  | 62  | 109 | 120 | 106 | 75  | 78  | 68  | 66 |
| 25  | 21  | 33  | 42  | 58  | 60  | 44  | 33  | 40  | 33 |
| 68  | 98  | 90  | 66  | 92  | 72  | 89  | 60  | 86  | 88 |
| 40  | 34  | 35  | 41  | 38  | 50  | 41  | 35  | 41  | 37 |
| 40  | 45  | 42  | 102 | 162 | 189 | 129 | 109 | 154 | 61 |
| 25  | 32  | 37  | 91  | 101 | 95  | 42  | 59  | 55  | 31 |
| 27  | 33  | 29  | 45  | 54  | 50  | 40  | 40  | 44  | 30 |
| 35  | 34  | 36  | 44  | 67  | 63  | 68  | 69  | 63  | 45 |
| 34  | 36  | 41  | 41  | 53  | 38  | 60  | 36  | 54  | 40 |
| 16  | 13  | 12  | 19  | 21  | 30  | 6   | 17  | 14  | 15 |
| 44  | 36  | 47  | 73  | 79  | 68  | 68  | 69  | 75  | 44 |
| 0   | 0   | 0   | 0   | 0   | 0   | 0   | 0   | 0   | 0  |
| 51  | 58  | 59  | 54  | 57  | 51  | 35  | 36  | 33  | 36 |
| 53  | 50  | 59  | 41  | 67  | 51  | 58  | 38  | 47  | 34 |
| 25  | 26  | 16  | 43  | 77  | 46  | 27  | 20  | 25  | 17 |
| 41  | 37  | 45  | 42  | 78  | 50  | 84  | 46  | 47  | 47 |
| 26  | 33  | 42  | 76  | 83  | 70  | 70  | 66  | 70  | 45 |
| 22  | 17  | 17  | 21  | 36  | 27  | 27  | 35  | 24  | 17 |
| 27  | 20  | 16  | 24  | 34  | 26  | 20  | 27  | 25  | 18 |
| 35  | 33  | 47  | 62  | 102 | 82  | 81  | 52  | 67  | 47 |
| 67  | 77  | 54  | 65  | 82  | 55  | 86  | 82  | 79  | 80 |
| 28  | 29  | 41  | 109 | 123 | 113 | 72  | 76  | 85  | 42 |
| 14  | 29  | 17  | 31  | 42  | 42  | 19  | 20  | 22  | 19 |



|     |     |     |     |     |     |     |     |     |     |
|-----|-----|-----|-----|-----|-----|-----|-----|-----|-----|
| 17  | 22  | 25  | 54  | 70  | 53  | 58  | 61  | 52  | 28  |
| 29  | 28  | 27  | 40  | 63  | 31  | 18  | 33  | 28  | 26  |
| 87  | 105 | 92  | 248 | 259 | 261 | 238 | 213 | 237 | 145 |
| 5   | 12  | 10  | 1   | 5   | 3   | 3   | 1   | 4   | 5   |
| 75  | 48  | 69  | 24  | 27  | 23  | 49  | 41  | 42  | 55  |
| 18  | 20  | 23  | 13  | 16  | 13  | 6   | 12  | 17  | 15  |
| 88  | 109 | 84  | 150 | 195 | 171 | 207 | 183 | 209 | 101 |
| 28  | 39  | 41  | 27  | 37  | 39  | 24  | 22  | 25  | 27  |
| 35  | 38  | 33  | 50  | 71  | 69  | 49  | 40  | 65  | 38  |
| 26  | 27  | 25  | 31  | 28  | 42  | 25  | 21  | 26  | 15  |
| 42  | 41  | 53  | 76  | 154 | 111 | 108 | 120 | 120 | 65  |
| 24  | 34  | 39  | 63  | 78  | 79  | 62  | 55  | 82  | 59  |
| 37  | 45  | 37  | 38  | 58  | 55  | 42  | 35  | 39  | 24  |
| 49  | 55  | 50  | 81  | 94  | 81  | 82  | 89  | 99  | 45  |
| 40  | 29  | 29  | 95  | 107 | 105 | 81  | 81  | 89  | 66  |
| 29  | 29  | 24  | 65  | 88  | 66  | 82  | 82  | 76  | 45  |
| 29  | 39  | 41  | 36  | 65  | 48  | 28  | 27  | 27  | 30  |
| 16  | 12  | 18  | 16  | 23  | 19  | 23  | 21  | 30  | 16  |
| 36  | 39  | 36  | 18  | 25  | 22  | 29  | 23  | 30  | 38  |
| 103 | 103 | 114 | 55  | 56  | 70  | 105 | 90  | 126 | 94  |
| 92  | 92  | 114 | 64  | 71  | 52  | 82  | 70  | 77  | 93  |
| 114 | 76  | 95  | 135 | 205 | 160 | 243 | 209 | 223 | 148 |
| 101 | 70  | 97  | 34  | 46  | 46  | 74  | 86  | 87  | 92  |
| 29  | 21  | 38  | 19  | 34  | 26  | 13  | 17  | 22  | 20  |
| 50  | 57  | 69  | 58  | 58  | 66  | 53  | 43  | 50  | 46  |
| 75  | 63  | 66  | 49  | 57  | 59  | 60  | 40  | 72  | 58  |
| 58  | 53  | 66  | 30  | 45  | 41  | 49  | 39  | 38  | 57  |
| 102 | 82  | 99  | 106 | 119 | 101 | 166 | 169 | 171 | 84  |
| 26  | 30  | 31  | 46  | 63  | 51  | 54  | 47  | 73  | 28  |
| 41  | 49  | 48  | 54  | 73  | 53  | 49  | 51  | 69  | 36  |
| 44  | 46  | 48  | 127 | 176 | 134 | 121 | 113 | 115 | 68  |
| 25  | 36  | 36  | 44  | 66  | 45  | 48  | 49  | 29  | 39  |
| 29  | 28  | 23  | 31  | 33  | 26  | 19  | 25  | 25  | 17  |
| 18  | 22  | 25  | 29  | 26  | 27  | 47  | 23  | 30  | 21  |
| 67  | 66  | 57  | 74  | 95  | 69  | 72  | 62  | 80  | 52  |
| 16  | 11  | 11  | 14  | 23  | 16  | 22  | 17  | 15  | 9   |
| 55  | 68  | 58  | 56  | 73  | 69  | 55  | 48  | 60  | 48  |
| 106 | 115 | 100 | 146 | 169 | 157 | 124 | 103 | 133 | 82  |
| 42  | 67  | 69  | 60  | 87  | 84  | 72  | 70  | 58  | 45  |
| 59  | 53  | 68  | 87  | 112 | 111 | 74  | 64  | 82  | 55  |
| 72  | 84  | 75  | 79  | 129 | 100 | 94  | 74  | 75  | 79  |

|     |     |     |     |     |     |     |     |     |     |
|-----|-----|-----|-----|-----|-----|-----|-----|-----|-----|
| 42  | 56  | 66  | 230 | 313 | 235 | 201 | 182 | 196 | 88  |
| 47  | 45  | 42  | 62  | 81  | 71  | 50  | 66  | 62  | 62  |
| 49  | 40  | 35  | 54  | 55  | 65  | 55  | 48  | 49  | 40  |
| 60  | 68  | 73  | 125 | 189 | 155 | 131 | 149 | 153 | 74  |
| 79  | 90  | 83  | 120 | 134 | 100 | 87  | 97  | 102 | 98  |
| 50  | 64  | 63  | 70  | 86  | 86  | 57  | 59  | 70  | 56  |
| 65  | 50  | 56  | 85  | 131 | 110 | 68  | 57  | 53  | 57  |
| 36  | 43  | 43  | 73  | 89  | 94  | 69  | 88  | 75  | 49  |
| 59  | 70  | 70  | 86  | 67  | 63  | 87  | 90  | 74  | 64  |
| 62  | 62  | 72  | 75  | 80  | 69  | 100 | 68  | 61  | 59  |
| 68  | 69  | 88  | 67  | 83  | 88  | 72  | 80  | 90  | 59  |
| 78  | 91  | 81  | 65  | 99  | 71  | 83  | 58  | 85  | 55  |
| 43  | 52  | 51  | 63  | 83  | 63  | 85  | 67  | 82  | 47  |
| 58  | 55  | 68  | 98  | 108 | 89  | 74  | 80  | 92  | 53  |
| 17  | 19  | 20  | 18  | 26  | 19  | 19  | 14  | 30  | 16  |
| 31  | 29  | 38  | 71  | 111 | 74  | 76  | 68  | 96  | 46  |
| 29  | 24  | 27  | 23  | 37  | 32  | 36  | 32  | 29  | 25  |
| 41  | 45  | 45  | 73  | 78  | 66  | 70  | 57  | 55  | 48  |
| 68  | 70  | 73  | 54  | 62  | 58  | 57  | 47  | 64  | 56  |
| 38  | 28  | 34  | 50  | 61  | 54  | 42  | 24  | 31  | 22  |
| 41  | 37  | 44  | 46  | 42  | 43  | 48  | 43  | 44  | 31  |
| 47  | 54  | 46  | 45  | 49  | 35  | 41  | 41  | 29  | 35  |
| 55  | 66  | 71  | 49  | 59  | 56  | 59  | 34  | 54  | 51  |
| 17  | 17  | 14  | 12  | 18  | 10  | 10  | 5   | 12  | 14  |
| 30  | 41  | 34  | 15  | 38  | 26  | 15  | 16  | 18  | 25  |
| 41  | 35  | 48  | 36  | 31  | 36  | 40  | 39  | 57  | 37  |
| 109 | 94  | 118 | 307 | 394 | 323 | 649 | 668 | 642 | 281 |
| 43  | 43  | 59  | 40  | 45  | 41  | 59  | 68  | 59  | 41  |
| 203 | 210 | 231 | 118 | 136 | 158 | 188 | 217 | 225 | 138 |
| 65  | 82  | 85  | 61  | 69  | 68  | 85  | 97  | 93  | 61  |
| 96  | 101 | 94  | 101 | 132 | 138 | 143 | 137 | 157 | 108 |
| 97  | 91  | 108 | 102 | 130 | 105 | 149 | 129 | 154 | 102 |
| 119 | 114 | 112 | 260 | 319 | 315 | 464 | 515 | 506 | 211 |
| 41  | 52  | 58  | 108 | 158 | 138 | 86  | 71  | 73  | 44  |
| 38  | 42  | 50  | 84  | 128 | 96  | 120 | 92  | 111 | 53  |
| 33  | 32  | 32  | 85  | 81  | 83  | 90  | 68  | 86  | 45  |
| 71  | 73  | 64  | 91  | 130 | 126 | 121 | 117 | 130 | 72  |
| 51  | 39  | 51  | 95  | 90  | 95  | 94  | 80  | 86  | 45  |
| 23  | 23  | 27  | 21  | 13  | 21  | 23  | 22  | 22  | 30  |
| 34  | 38  | 33  | 48  | 42  | 66  | 42  | 42  | 41  | 23  |
| 36  | 33  | 27  | 15  | 24  | 23  | 13  | 11  | 10  | 18  |

|     |     |     |     |     |     |     |     |     |     |
|-----|-----|-----|-----|-----|-----|-----|-----|-----|-----|
| 22  | 21  | 46  | 26  | 29  | 25  | 19  | 24  | 31  | 26  |
| 97  | 93  | 94  | 121 | 176 | 146 | 123 | 138 | 124 | 66  |
| 55  | 53  | 60  | 86  | 101 | 79  | 78  | 55  | 67  | 39  |
| 42  | 54  | 50  | 66  | 89  | 74  | 75  | 65  | 97  | 51  |
| 81  | 74  | 81  | 111 | 125 | 103 | 99  | 87  | 108 | 88  |
| 58  | 57  | 59  | 56  | 65  | 48  | 73  | 76  | 72  | 51  |
| 43  | 35  | 41  | 57  | 86  | 46  | 54  | 53  | 72  | 46  |
| 53  | 55  | 52  | 70  | 53  | 51  | 66  | 45  | 64  | 43  |
| 72  | 72  | 88  | 89  | 116 | 96  | 169 | 169 | 184 | 113 |
| 82  | 88  | 102 | 90  | 113 | 87  | 89  | 57  | 86  | 53  |
| 62  | 56  | 46  | 88  | 102 | 89  | 57  | 91  | 87  | 50  |
| 37  | 50  | 45  | 79  | 92  | 104 | 82  | 84  | 86  | 42  |
| 4   | 13  | 5   | 20  | 21  | 16  | 10  | 8   | 4   | 6   |
| 51  | 30  | 35  | 57  | 71  | 63  | 82  | 80  | 82  | 47  |
| 15  | 20  | 21  | 25  | 30  | 19  | 25  | 24  | 34  | 19  |
| 37  | 46  | 36  | 39  | 49  | 64  | 79  | 58  | 58  | 44  |
| 26  | 37  | 34  | 90  | 105 | 133 | 128 | 104 | 116 | 52  |
| 9   | 11  | 13  | 30  | 40  | 21  | 29  | 29  | 32  | 16  |
| 86  | 94  | 86  | 94  | 135 | 120 | 100 | 85  | 94  | 71  |
| 92  | 102 | 91  | 41  | 60  | 35  | 45  | 52  | 71  | 54  |
| 38  | 24  | 35  | 24  | 19  | 8   | 10  | 12  | 18  | 17  |
| 105 | 94  | 113 | 25  | 58  | 38  | 46  | 42  | 52  | 62  |
| 37  | 50  | 40  | 45  | 46  | 42  | 51  | 39  | 50  | 34  |
| 53  | 50  | 53  | 474 | 587 | 549 | 688 | 663 | 659 | 290 |
| 4   | 11  | 3   | 14  | 23  | 19  | 18  | 14  | 11  | 6   |
| 40  | 37  | 39  | 60  | 64  | 55  | 58  | 47  | 37  | 32  |
| 23  | 37  | 25  | 25  | 18  | 25  | 26  | 29  | 25  | 22  |
| 22  | 18  | 18  | 27  | 43  | 36  | 21  | 43  | 36  | 24  |
| 17  | 18  | 22  | 42  | 60  | 45  | 55  | 51  | 52  | 34  |
| 32  | 29  | 28  | 57  | 87  | 71  | 58  | 44  | 58  | 30  |
| 11  | 9   | 13  | 16  | 18  | 21  | 9   | 15  | 15  | 10  |
| 31  | 26  | 22  | 60  | 108 | 76  | 81  | 70  | 65  | 42  |
| 57  | 48  | 48  | 82  | 99  | 77  | 99  | 70  | 105 | 50  |
| 17  | 11  | 8   | 47  | 56  | 52  | 31  | 31  | 25  | 17  |
| 41  | 50  | 48  | 67  | 81  | 82  | 90  | 68  | 102 | 55  |
| 41  | 47  | 56  | 98  | 117 | 123 | 97  | 91  | 102 | 57  |
| 12  | 7   | 9   | 9   | 13  | 14  | 6   | 2   | 3   | 7   |
| 70  | 78  | 70  | 80  | 107 | 68  | 78  | 66  | 95  | 55  |
| 70  | 91  | 68  | 149 | 185 | 184 | 235 | 215 | 217 | 109 |
| 78  | 74  | 97  | 128 | 145 | 143 | 205 | 208 | 214 | 110 |
| 44  | 48  | 49  | 107 | 141 | 127 | 249 | 214 | 273 | 143 |

|     |     |     |     |     |     |     |     |     |     |
|-----|-----|-----|-----|-----|-----|-----|-----|-----|-----|
| 58  | 66  | 64  | 113 | 143 | 152 | 145 | 117 | 135 | 82  |
| 48  | 61  | 69  | 122 | 164 | 154 | 209 | 220 | 206 | 108 |
| 15  | 10  | 20  | 17  | 24  | 27  | 11  | 15  | 18  | 11  |
| 14  | 13  | 19  | 25  | 36  | 21  | 30  | 43  | 27  | 21  |
| 29  | 33  | 31  | 71  | 100 | 63  | 87  | 81  | 77  | 53  |
| 36  | 32  | 36  | 87  | 130 | 86  | 77  | 63  | 52  | 48  |
| 23  | 15  | 22  | 36  | 44  | 22  | 35  | 26  | 31  | 17  |
| 69  | 75  | 95  | 87  | 96  | 95  | 103 | 98  | 93  | 94  |
| 41  | 34  | 34  | 45  | 54  | 48  | 44  | 52  | 45  | 36  |
| 34  | 39  | 30  | 43  | 66  | 43  | 55  | 39  | 42  | 31  |
| 55  | 62  | 49  | 43  | 52  | 51  | 53  | 44  | 58  | 37  |
| 67  | 70  | 67  | 47  | 45  | 45  | 66  | 56  | 52  | 60  |
| 91  | 67  | 78  | 79  | 94  | 94  | 93  | 93  | 95  | 91  |
| 27  | 26  | 31  | 21  | 31  | 39  | 31  | 30  | 17  | 24  |
| 81  | 102 | 111 | 70  | 109 | 85  | 101 | 85  | 89  | 61  |
| 30  | 48  | 44  | 74  | 102 | 81  | 87  | 75  | 79  | 41  |
| 13  | 14  | 23  | 237 | 327 | 271 | 363 | 290 | 331 | 171 |
| 46  | 55  | 53  | 24  | 26  | 23  | 31  | 32  | 42  | 25  |
| 66  | 47  | 62  | 57  | 107 | 83  | 71  | 76  | 94  | 58  |
| 39  | 33  | 43  | 26  | 22  | 29  | 48  | 24  | 32  | 25  |
| 60  | 58  | 69  | 87  | 74  | 78  | 84  | 73  | 69  | 44  |
| 41  | 35  | 58  | 37  | 51  | 51  | 39  | 38  | 47  | 38  |
| 34  | 32  | 40  | 42  | 69  | 56  | 53  | 57  | 64  | 33  |
| 28  | 34  | 38  | 27  | 35  | 33  | 35  | 35  | 41  | 29  |
| 79  | 71  | 70  | 113 | 144 | 93  | 111 | 100 | 131 | 73  |
| 104 | 118 | 124 | 99  | 117 | 90  | 99  | 116 | 102 | 86  |
| 73  | 69  | 96  | 123 | 142 | 126 | 213 | 166 | 189 | 106 |
| 37  | 30  | 40  | 42  | 25  | 23  | 23  | 12  | 29  | 17  |
| 81  | 74  | 96  | 55  | 43  | 41  | 71  | 58  | 64  | 67  |
| 83  | 99  | 93  | 117 | 129 | 110 | 123 | 107 | 84  | 62  |
| 36  | 30  | 39  | 23  | 39  | 32  | 45  | 27  | 39  | 42  |
| 74  | 78  | 103 | 71  | 97  | 85  | 127 | 110 | 126 | 93  |
| 68  | 77  | 92  | 145 | 160 | 155 | 207 | 179 | 179 | 97  |
| 58  | 63  | 64  | 140 | 164 | 130 | 190 | 178 | 180 | 78  |
| 35  | 33  | 32  | 42  | 61  | 56  | 63  | 63  | 66  | 40  |
| 48  | 42  | 34  | 121 | 160 | 126 | 129 | 124 | 137 | 85  |
| 45  | 45  | 49  | 92  | 137 | 116 | 91  | 103 | 96  | 63  |
| 48  | 51  | 46  | 67  | 93  | 93  | 78  | 85  | 80  | 52  |
| 49  | 36  | 45  | 56  | 70  | 69  | 48  | 62  | 65  | 36  |
| 50  | 42  | 51  | 67  | 98  | 109 | 103 | 88  | 77  | 46  |
| 40  | 38  | 39  | 68  | 92  | 96  | 76  | 92  | 75  | 40  |

|    |    |     |     |     |     |     |     |     |     |
|----|----|-----|-----|-----|-----|-----|-----|-----|-----|
| 26 | 32 | 48  | 91  | 60  | 94  | 97  | 80  | 95  | 49  |
| 49 | 64 | 48  | 90  | 143 | 138 | 99  | 121 | 97  | 80  |
| 34 | 27 | 40  | 27  | 32  | 26  | 29  | 20  | 28  | 32  |
| 89 | 91 | 121 | 145 | 172 | 174 | 184 | 154 | 168 | 103 |
| 70 | 63 | 66  | 92  | 135 | 112 | 150 | 107 | 107 | 82  |
| 72 | 55 | 72  | 94  | 152 | 123 | 135 | 124 | 125 | 88  |
| 91 | 75 | 91  | 108 | 151 | 137 | 142 | 134 | 157 | 97  |
| 47 | 42 | 59  | 57  | 85  | 71  | 65  | 68  | 51  | 52  |
| 37 | 48 | 41  | 91  | 115 | 100 | 117 | 122 | 136 | 59  |
| 18 | 22 | 12  | 55  | 68  | 56  | 65  | 50  | 47  | 24  |
| 37 | 49 | 44  | 104 | 106 | 108 | 104 | 97  | 76  | 49  |
| 19 | 33 | 33  | 21  | 33  | 33  | 52  | 48  | 31  | 39  |
| 48 | 49 | 52  | 100 | 108 | 82  | 95  | 76  | 93  | 67  |
| 62 | 65 | 71  | 97  | 140 | 106 | 156 | 147 | 148 | 84  |
| 70 | 75 | 90  | 104 | 122 | 93  | 126 | 89  | 98  | 84  |
| 28 | 40 | 40  | 32  | 51  | 51  | 43  | 41  | 44  | 33  |
| 30 | 26 | 37  | 17  | 22  | 10  | 21  | 11  | 16  | 23  |
| 45 | 44 | 39  | 65  | 105 | 80  | 83  | 93  | 73  | 46  |
| 39 | 34 | 59  | 93  | 122 | 89  | 99  | 85  | 100 | 50  |
| 40 | 40 | 54  | 73  | 128 | 90  | 82  | 87  | 75  | 43  |
| 77 | 68 | 73  | 147 | 219 | 137 | 159 | 153 | 164 | 91  |
| 26 | 18 | 24  | 36  | 41  | 37  | 31  | 31  | 32  | 36  |
| 19 | 21 | 23  | 27  | 32  | 37  | 23  | 44  | 33  | 28  |
| 55 | 63 | 55  | 27  | 40  | 27  | 23  | 25  | 25  | 25  |
| 45 | 46 | 47  | 16  | 26  | 33  | 16  | 13  | 23  | 17  |
| 51 | 53 | 68  | 52  | 70  | 52  | 47  | 35  | 33  | 38  |
| 25 | 31 | 35  | 22  | 32  | 27  | 15  | 18  | 24  | 30  |
| 35 | 51 | 54  | 30  | 30  | 22  | 40  | 17  | 38  | 25  |
| 15 | 28 | 19  | 29  | 33  | 34  | 23  | 22  | 31  | 16  |
| 25 | 12 | 20  | 13  | 38  | 21  | 22  | 18  | 18  | 16  |
| 20 | 19 | 18  | 4   | 9   | 5   | 6   | 5   | 5   | 15  |
| 54 | 54 | 69  | 66  | 70  | 86  | 64  | 56  | 70  | 33  |
| 40 | 37 | 34  | 24  | 49  | 33  | 29  | 27  | 34  | 29  |
| 31 | 50 | 29  | 67  | 91  | 73  | 104 | 90  | 100 | 57  |
| 33 | 52 | 49  | 64  | 68  | 57  | 63  | 65  | 77  | 32  |
| 28 | 29 | 36  | 43  | 59  | 47  | 50  | 23  | 46  | 32  |
| 33 | 52 | 44  | 88  | 113 | 114 | 61  | 62  | 61  | 52  |
| 27 | 35 | 42  | 68  | 102 | 73  | 56  | 55  | 53  | 41  |
| 21 | 27 | 18  | 25  | 30  | 29  | 30  | 18  | 17  | 18  |
| 47 | 43 | 54  | 88  | 105 | 103 | 105 | 106 | 110 | 58  |
| 82 | 99 | 88  | 133 | 143 | 134 | 140 | 143 | 165 | 100 |

|     |     |     |     |     |     |     |     |     |     |
|-----|-----|-----|-----|-----|-----|-----|-----|-----|-----|
| 54  | 50  | 54  | 70  | 86  | 70  | 47  | 53  | 57  | 55  |
| 35  | 46  | 40  | 45  | 49  | 56  | 36  | 24  | 36  | 34  |
| 22  | 23  | 19  | 43  | 38  | 49  | 32  | 31  | 38  | 32  |
| 23  | 24  | 31  | 100 | 133 | 103 | 53  | 52  | 68  | 35  |
| 47  | 37  | 52  | 56  | 59  | 55  | 68  | 48  | 51  | 45  |
| 47  | 50  | 67  | 80  | 95  | 93  | 113 | 103 | 121 | 63  |
| 25  | 27  | 34  | 72  | 92  | 60  | 47  | 40  | 50  | 40  |
| 36  | 30  | 35  | 63  | 65  | 76  | 72  | 67  | 73  | 32  |
| 15  | 14  | 23  | 46  | 61  | 70  | 72  | 62  | 78  | 27  |
| 88  | 83  | 94  | 71  | 82  | 60  | 83  | 55  | 59  | 41  |
| 40  | 33  | 37  | 30  | 31  | 23  | 33  | 26  | 34  | 21  |
| 50  | 48  | 46  | 197 | 224 | 163 | 209 | 163 | 205 | 68  |
| 34  | 17  | 20  | 13  | 13  | 17  | 10  | 8   | 8   | 18  |
| 52  | 68  | 57  | 74  | 102 | 77  | 78  | 65  | 66  | 48  |
| 52  | 38  | 50  | 17  | 34  | 28  | 34  | 16  | 20  | 26  |
| 36  | 46  | 48  | 26  | 42  | 23  | 44  | 38  | 47  | 31  |
| 63  | 79  | 73  | 69  | 84  | 66  | 57  | 52  | 52  | 66  |
| 63  | 78  | 96  | 123 | 141 | 105 | 117 | 84  | 103 | 78  |
| 33  | 61  | 58  | 96  | 107 | 122 | 155 | 159 | 210 | 86  |
| 66  | 52  | 73  | 677 | 927 | 851 | 675 | 634 | 695 | 343 |
| 35  | 42  | 42  | 198 | 256 | 223 | 177 | 158 | 192 | 82  |
| 48  | 46  | 56  | 121 | 97  | 95  | 118 | 100 | 102 | 53  |
| 39  | 37  | 39  | 50  | 62  | 46  | 51  | 43  | 43  | 31  |
| 46  | 44  | 38  | 30  | 42  | 46  | 32  | 40  | 24  | 25  |
| 16  | 14  | 31  | 22  | 44  | 27  | 14  | 14  | 14  | 18  |
| 37  | 47  | 46  | 36  | 45  | 50  | 41  | 35  | 38  | 35  |
| 8   | 13  | 12  | 28  | 35  | 32  | 39  | 23  | 31  | 18  |
| 14  | 14  | 18  | 26  | 27  | 20  | 21  | 16  | 18  | 18  |
| 34  | 27  | 20  | 40  | 27  | 32  | 33  | 30  | 42  | 29  |
| 24  | 25  | 31  | 27  | 37  | 37  | 26  | 36  | 29  | 22  |
| 25  | 31  | 24  | 31  | 32  | 51  | 38  | 40  | 38  | 33  |
| 34  | 29  | 39  | 94  | 102 | 108 | 74  | 72  | 74  | 51  |
| 63  | 53  | 61  | 468 | 608 | 548 | 510 | 471 | 494 | 232 |
| 37  | 31  | 43  | 155 | 217 | 178 | 173 | 150 | 180 | 72  |
| 45  | 46  | 35  | 78  | 105 | 85  | 76  | 58  | 64  | 32  |
| 23  | 28  | 32  | 59  | 95  | 84  | 60  | 50  | 63  | 33  |
| 24  | 27  | 33  | 34  | 41  | 31  | 38  | 26  | 21  | 31  |
| 44  | 58  | 59  | 73  | 87  | 74  | 64  | 52  | 59  | 44  |
| 120 | 128 | 134 | 71  | 82  | 91  | 99  | 91  | 98  | 109 |
| 211 | 241 | 212 | 170 | 263 | 209 | 305 | 236 | 307 | 200 |
| 26  | 27  | 20  | 38  | 53  | 56  | 53  | 32  | 33  | 34  |

|    |    |     |     |     |     |     |     |     |     |
|----|----|-----|-----|-----|-----|-----|-----|-----|-----|
| 51 | 74 | 64  | 122 | 140 | 128 | 139 | 131 | 132 | 68  |
| 43 | 42 | 34  | 29  | 50  | 43  | 29  | 31  | 33  | 21  |
| 18 | 18 | 17  | 14  | 21  | 14  | 17  | 12  | 15  | 15  |
| 33 | 49 | 49  | 60  | 92  | 81  | 80  | 64  | 71  | 60  |
| 11 | 5  | 13  | 6   | 21  | 15  | 18  | 22  | 20  | 11  |
| 35 | 31 | 32  | 61  | 65  | 51  | 59  | 48  | 62  | 26  |
| 21 | 17 | 21  | 53  | 66  | 34  | 57  | 39  | 44  | 22  |
| 23 | 31 | 43  | 143 | 189 | 137 | 162 | 130 | 150 | 64  |
| 44 | 46 | 49  | 82  | 83  | 62  | 64  | 62  | 62  | 36  |
| 40 | 46 | 58  | 69  | 74  | 58  | 65  | 61  | 54  | 45  |
| 41 | 42 | 46  | 68  | 66  | 65  | 58  | 43  | 47  | 24  |
| 58 | 41 | 61  | 69  | 64  | 46  | 63  | 61  | 79  | 48  |
| 60 | 29 | 60  | 48  | 64  | 56  | 46  | 57  | 53  | 37  |
| 61 | 65 | 70  | 87  | 94  | 97  | 112 | 100 | 116 | 74  |
| 18 | 13 | 19  | 17  | 40  | 34  | 20  | 15  | 30  | 18  |
| 43 | 42 | 47  | 41  | 50  | 53  | 43  | 47  | 61  | 45  |
| 44 | 70 | 42  | 114 | 152 | 159 | 162 | 149 | 139 | 92  |
| 69 | 88 | 115 | 111 | 128 | 131 | 160 | 144 | 148 | 78  |
| 31 | 22 | 36  | 23  | 34  | 38  | 53  | 42  | 50  | 22  |
| 18 | 12 | 29  | 40  | 52  | 50  | 63  | 40  | 56  | 28  |
| 70 | 74 | 86  | 72  | 92  | 60  | 115 | 94  | 103 | 76  |
| 15 | 30 | 34  | 102 | 136 | 96  | 70  | 75  | 93  | 37  |
| 16 | 22 | 27  | 15  | 21  | 17  | 20  | 20  | 23  | 20  |
| 27 | 44 | 35  | 111 | 162 | 135 | 154 | 122 | 157 | 60  |
| 19 | 23 | 25  | 22  | 19  | 24  | 24  | 19  | 23  | 27  |
| 37 | 40 | 36  | 26  | 31  | 24  | 36  | 31  | 37  | 27  |
| 23 | 20 | 28  | 46  | 33  | 52  | 40  | 51  | 63  | 44  |
| 43 | 42 | 42  | 66  | 90  | 66  | 77  | 85  | 74  | 60  |
| 65 | 57 | 81  | 48  | 40  | 50  | 59  | 51  | 69  | 50  |
| 58 | 83 | 67  | 55  | 68  | 69  | 84  | 85  | 121 | 52  |
| 84 | 94 | 108 | 160 | 233 | 190 | 188 | 180 | 174 | 108 |
| 51 | 61 | 45  | 59  | 111 | 100 | 72  | 53  | 62  | 39  |
| 6  | 3  | 8   | 1   | 7   | 3   | 8   | 6   | 7   | 4   |
| 52 | 45 | 73  | 103 | 150 | 120 | 137 | 151 | 157 | 69  |
| 36 | 27 | 22  | 75  | 102 | 65  | 40  | 56  | 55  | 34  |
| 30 | 17 | 29  | 122 | 147 | 116 | 80  | 78  | 93  | 42  |
| 14 | 8  | 20  | 28  | 37  | 30  | 15  | 22  | 24  | 18  |
| 35 | 42 | 38  | 53  | 57  | 69  | 48  | 39  | 34  | 32  |
| 47 | 33 | 54  | 135 | 179 | 137 | 110 | 108 | 117 | 59  |
| 43 | 64 | 51  | 165 | 181 | 174 | 120 | 103 | 102 | 64  |
| 39 | 35 | 50  | 100 | 95  | 92  | 80  | 72  | 79  | 51  |

|    |    |    |     |     |     |     |     |     |    |
|----|----|----|-----|-----|-----|-----|-----|-----|----|
| 43 | 30 | 48 | 60  | 71  | 71  | 106 | 115 | 85  | 58 |
| 24 | 28 | 27 | 35  | 35  | 32  | 46  | 39  | 36  | 38 |
| 42 | 29 | 42 | 86  | 119 | 107 | 75  | 65  | 64  | 51 |
| 48 | 47 | 48 | 36  | 50  | 58  | 43  | 46  | 55  | 40 |
| 28 | 31 | 36 | 17  | 28  | 22  | 30  | 22  | 19  | 21 |
| 11 | 9  | 11 | 6   | 13  | 4   | 4   | 14  | 10  | 7  |
| 7  | 13 | 8  | 3   | 2   | 5   | 8   | 1   | 6   | 2  |
| 20 | 22 | 17 | 28  | 32  | 30  | 36  | 25  | 16  | 24 |
| 42 | 37 | 43 | 53  | 71  | 58  | 37  | 33  | 43  | 30 |
| 36 | 49 | 38 | 24  | 36  | 21  | 32  | 36  | 34  | 23 |
| 17 | 16 | 16 | 8   | 15  | 10  | 9   | 9   | 17  | 23 |
| 50 | 39 | 34 | 30  | 37  | 42  | 28  | 32  | 39  | 30 |
| 68 | 70 | 49 | 51  | 86  | 65  | 55  | 61  | 72  | 52 |
| 22 | 30 | 31 | 42  | 56  | 36  | 42  | 34  | 40  | 21 |
| 25 | 31 | 32 | 31  | 37  | 31  | 46  | 23  | 41  | 19 |
| 75 | 91 | 76 | 106 | 133 | 121 | 123 | 129 | 144 | 65 |
| 65 | 82 | 86 | 112 | 113 | 110 | 123 | 97  | 106 | 75 |
| 24 | 28 | 24 | 46  | 59  | 48  | 53  | 48  | 58  | 34 |
| 51 | 46 | 60 | 61  | 76  | 64  | 75  | 68  | 64  | 55 |
| 87 | 72 | 67 | 105 | 141 | 94  | 117 | 99  | 111 | 52 |
| 43 | 30 | 44 | 48  | 61  | 42  | 32  | 33  | 34  | 39 |
| 58 | 55 | 45 | 110 | 136 | 131 | 86  | 88  | 116 | 63 |
| 30 | 21 | 32 | 98  | 110 | 72  | 71  | 54  | 60  | 36 |
| 37 | 40 | 38 | 71  | 102 | 76  | 79  | 79  | 85  | 41 |
| 39 | 54 | 44 | 52  | 69  | 40  | 49  | 56  | 75  | 53 |
| 46 | 35 | 28 | 31  | 38  | 29  | 55  | 35  | 47  | 46 |
| 25 | 32 | 37 | 60  | 78  | 74  | 78  | 80  | 69  | 52 |
| 37 | 36 | 36 | 51  | 55  | 53  | 46  | 51  | 65  | 32 |
| 20 | 22 | 40 | 68  | 87  | 80  | 106 | 93  | 111 | 46 |
| 36 | 27 | 32 | 4   | 10  | 18  | 22  | 18  | 14  | 19 |
| 52 | 68 | 82 | 78  | 134 | 105 | 132 | 109 | 105 | 91 |
| 45 | 34 | 41 | 97  | 132 | 108 | 86  | 68  | 90  | 53 |
| 41 | 51 | 61 | 93  | 114 | 96  | 99  | 90  | 93  | 48 |
| 35 | 24 | 27 | 37  | 36  | 45  | 34  | 31  | 31  | 22 |
| 30 | 36 | 31 | 50  | 58  | 50  | 51  | 50  | 59  | 38 |
| 51 | 44 | 46 | 67  | 77  | 56  | 72  | 68  | 70  | 47 |
| 15 | 19 | 22 | 21  | 24  | 15  | 13  | 20  | 25  | 17 |
| 23 | 36 | 24 | 13  | 22  | 16  | 11  | 9   | 13  | 11 |
| 3  | 9  | 6  | 13  | 17  | 8   | 15  | 15  | 11  | 12 |
| 41 | 31 | 37 | 77  | 92  | 106 | 77  | 72  | 86  | 59 |
| 64 | 54 | 71 | 68  | 96  | 81  | 108 | 93  | 96  | 76 |



|     |     |     |     |     |     |     |     |     |     |
|-----|-----|-----|-----|-----|-----|-----|-----|-----|-----|
| 69  | 56  | 62  | 108 | 134 | 96  | 116 | 99  | 86  | 57  |
| 35  | 38  | 43  | 46  | 69  | 60  | 33  | 35  | 34  | 37  |
| 59  | 45  | 54  | 57  | 75  | 70  | 76  | 73  | 80  | 43  |
| 28  | 22  | 31  | 17  | 32  | 33  | 14  | 23  | 20  | 33  |
| 44  | 55  | 39  | 49  | 64  | 59  | 46  | 44  | 37  | 29  |
| 40  | 37  | 42  | 44  | 39  | 39  | 45  | 34  | 48  | 43  |
| 38  | 32  | 38  | 37  | 34  | 42  | 46  | 30  | 39  | 31  |
| 26  | 22  | 30  | 30  | 30  | 25  | 30  | 17  | 24  | 21  |
| 51  | 62  | 48  | 70  | 86  | 68  | 86  | 85  | 74  | 59  |
| 46  | 57  | 56  | 51  | 47  | 60  | 68  | 81  | 77  | 58  |
| 40  | 34  | 50  | 31  | 37  | 33  | 23  | 26  | 32  | 39  |
| 46  | 38  | 55  | 61  | 52  | 46  | 66  | 56  | 58  | 44  |
| 33  | 33  | 35  | 55  | 53  | 47  | 66  | 66  | 77  | 24  |
| 14  | 22  | 19  | 37  | 39  | 35  | 44  | 33  | 36  | 22  |
| 43  | 45  | 55  | 98  | 135 | 102 | 91  | 75  | 93  | 65  |
| 20  | 25  | 33  | 47  | 44  | 39  | 39  | 37  | 42  | 30  |
| 42  | 67  | 62  | 41  | 87  | 55  | 93  | 80  | 82  | 48  |
| 56  | 58  | 50  | 76  | 98  | 81  | 80  | 77  | 87  | 53  |
| 47  | 52  | 48  | 66  | 78  | 94  | 95  | 65  | 78  | 60  |
| 119 | 117 | 143 | 134 | 163 | 148 | 154 | 143 | 167 | 100 |
| 75  | 96  | 94  | 91  | 105 | 105 | 116 | 127 | 110 | 75  |
| 8   | 10  | 11  | 14  | 15  | 7   | 6   | 9   | 8   | 9   |
| 51  | 61  | 52  | 41  | 42  | 44  | 64  | 57  | 67  | 45  |
| 56  | 53  | 52  | 16  | 28  | 23  | 30  | 31  | 34  | 43  |
| 61  | 53  | 68  | 36  | 44  | 36  | 44  | 55  | 60  | 58  |
| 63  | 63  | 68  | 49  | 69  | 45  | 53  | 76  | 61  | 47  |
| 125 | 115 | 106 | 299 | 401 | 326 | 391 | 344 | 373 | 192 |
| 74  | 54  | 71  | 36  | 64  | 67  | 64  | 78  | 71  | 52  |
| 26  | 12  | 23  | 3   | 17  | 12  | 18  | 9   | 28  | 13  |
| 62  | 61  | 52  | 56  | 67  | 69  | 76  | 79  | 89  | 49  |
| 37  | 36  | 55  | 39  | 56  | 43  | 65  | 64  | 60  | 44  |
| 32  | 38  | 41  | 42  | 49  | 47  | 34  | 44  | 46  | 32  |
| 35  | 32  | 42  | 46  | 47  | 53  | 53  | 50  | 49  | 44  |
| 52  | 67  | 53  | 54  | 89  | 67  | 68  | 70  | 81  | 57  |
| 30  | 34  | 39  | 32  | 41  | 52  | 39  | 34  | 38  | 37  |
| 22  | 22  | 33  | 22  | 41  | 37  | 23  | 22  | 24  | 29  |
| 30  | 35  | 38  | 31  | 47  | 45  | 33  | 30  | 40  | 33  |
| 14  | 13  | 11  | 11  | 13  | 10  | 11  | 5   | 8   | 10  |
| 31  | 37  | 30  | 46  | 65  | 62  | 58  | 56  | 63  | 45  |
| 71  | 62  | 48  | 59  | 78  | 75  | 76  | 103 | 92  | 59  |
| 67  | 68  | 76  | 42  | 72  | 61  | 48  | 46  | 66  | 57  |

|     |     |     |     |     |     |     |     |     |     |
|-----|-----|-----|-----|-----|-----|-----|-----|-----|-----|
| 60  | 61  | 67  | 52  | 49  | 38  | 58  | 65  | 57  | 49  |
| 78  | 65  | 87  | 85  | 102 | 86  | 95  | 70  | 65  | 88  |
| 69  | 71  | 66  | 67  | 79  | 74  | 77  | 59  | 74  | 77  |
| 96  | 101 | 109 | 102 | 119 | 118 | 116 | 111 | 134 | 98  |
| 43  | 57  | 62  | 62  | 69  | 64  | 64  | 49  | 67  | 61  |
| 75  | 54  | 69  | 46  | 58  | 68  | 66  | 57  | 76  | 71  |
| 58  | 49  | 84  | 84  | 102 | 111 | 87  | 113 | 81  | 72  |
| 75  | 73  | 100 | 60  | 67  | 79  | 103 | 104 | 99  | 63  |
| 30  | 41  | 52  | 37  | 66  | 53  | 45  | 48  | 58  | 34  |
| 61  | 92  | 91  | 138 | 167 | 166 | 132 | 105 | 136 | 80  |
| 64  | 56  | 65  | 103 | 113 | 101 | 76  | 87  | 91  | 52  |
| 65  | 88  | 89  | 95  | 170 | 125 | 125 | 155 | 160 | 85  |
| 51  | 69  | 61  | 55  | 82  | 58  | 59  | 51  | 50  | 36  |
| 54  | 49  | 53  | 107 | 123 | 122 | 76  | 77  | 83  | 60  |
| 34  | 34  | 47  | 70  | 93  | 69  | 73  | 67  | 77  | 53  |
| 40  | 54  | 40  | 72  | 111 | 86  | 76  | 66  | 83  | 57  |
| 33  | 40  | 27  | 41  | 55  | 45  | 34  | 21  | 24  | 21  |
| 53  | 28  | 48  | 76  | 111 | 103 | 89  | 80  | 71  | 47  |
| 31  | 47  | 35  | 73  | 84  | 66  | 71  | 47  | 56  | 40  |
| 48  | 30  | 40  | 113 | 136 | 120 | 122 | 117 | 102 | 46  |
| 68  | 66  | 68  | 113 | 128 | 124 | 87  | 59  | 70  | 67  |
| 55  | 48  | 63  | 95  | 117 | 100 | 74  | 60  | 82  | 70  |
| 53  | 65  | 67  | 212 | 285 | 252 | 201 | 195 | 229 | 96  |
| 161 | 151 | 153 | 312 | 420 | 405 | 376 | 329 | 432 | 216 |
| 41  | 48  | 61  | 135 | 185 | 149 | 176 | 161 | 203 | 88  |
| 55  | 49  | 37  | 111 | 118 | 129 | 126 | 110 | 105 | 57  |
| 73  | 82  | 70  | 214 | 242 | 223 | 291 | 276 | 304 | 161 |
| 12  | 13  | 14  | 50  | 59  | 45  | 62  | 38  | 45  | 32  |
| 61  | 55  | 91  | 90  | 105 | 120 | 128 | 137 | 136 | 83  |
| 22  | 26  | 28  | 32  | 57  | 39  | 46  | 44  | 49  | 31  |
| 49  | 46  | 52  | 79  | 104 | 78  | 113 | 125 | 121 | 60  |
| 36  | 33  | 42  | 118 | 136 | 123 | 145 | 122 | 137 | 51  |
| 14  | 19  | 19  | 49  | 50  | 61  | 51  | 61  | 56  | 26  |
| 31  | 32  | 39  | 106 | 162 | 144 | 111 | 104 | 103 | 56  |
| 52  | 59  | 50  | 61  | 92  | 102 | 112 | 79  | 97  | 61  |
| 56  | 52  | 50  | 79  | 98  | 60  | 57  | 61  | 83  | 54  |
| 48  | 51  | 56  | 116 | 124 | 168 | 118 | 123 | 111 | 79  |
| 54  | 46  | 53  | 188 | 314 | 252 | 285 | 231 | 271 | 90  |
| 24  | 19  | 20  | 105 | 170 | 169 | 117 | 118 | 114 | 55  |
| 61  | 51  | 70  | 233 | 337 | 323 | 304 | 258 | 306 | 116 |
| 22  | 26  | 24  | 69  | 84  | 64  | 66  | 50  | 66  | 38  |

|     |     |     |     |     |     |     |     |     |     |
|-----|-----|-----|-----|-----|-----|-----|-----|-----|-----|
| 43  | 39  | 51  | 148 | 208 | 155 | 286 | 267 | 269 | 98  |
| 91  | 92  | 72  | 272 | 395 | 334 | 405 | 366 | 399 | 184 |
| 34  | 29  | 40  | 202 | 267 | 231 | 233 | 186 | 233 | 100 |
| 60  | 55  | 49  | 123 | 163 | 123 | 168 | 124 | 142 | 77  |
| 35  | 34  | 50  | 39  | 23  | 27  | 40  | 37  | 33  | 36  |
| 58  | 51  | 50  | 159 | 195 | 169 | 126 | 112 | 101 | 64  |
| 30  | 23  | 28  | 69  | 100 | 63  | 53  | 36  | 39  | 18  |
| 44  | 29  | 45  | 79  | 118 | 79  | 93  | 61  | 93  | 36  |
| 29  | 33  | 31  | 12  | 13  | 23  | 28  | 22  | 13  | 21  |
| 8   | 4   | 6   | 4   | 7   | 6   | 2   | 3   | 6   | 7   |
| 63  | 51  | 51  | 84  | 114 | 88  | 70  | 89  | 80  | 68  |
| 55  | 57  | 59  | 99  | 136 | 125 | 116 | 94  | 95  | 79  |
| 49  | 48  | 51  | 27  | 45  | 41  | 41  | 44  | 48  | 39  |
| 43  | 38  | 43  | 30  | 43  | 48  | 46  | 43  | 31  | 42  |
| 48  | 45  | 37  | 86  | 104 | 83  | 95  | 78  | 80  | 65  |
| 65  | 69  | 85  | 70  | 144 | 101 | 86  | 75  | 74  | 76  |
| 94  | 102 | 126 | 164 | 217 | 198 | 216 | 159 | 206 | 115 |
| 66  | 51  | 100 | 89  | 139 | 118 | 90  | 75  | 87  | 35  |
| 13  | 22  | 22  | 32  | 30  | 25  | 42  | 31  | 26  | 23  |
| 26  | 38  | 43  | 29  | 40  | 33  | 33  | 27  | 47  | 25  |
| 49  | 52  | 67  | 44  | 69  | 45  | 76  | 54  | 71  | 53  |
| 50  | 37  | 73  | 147 | 207 | 165 | 222 | 194 | 216 | 113 |
| 91  | 59  | 81  | 62  | 63  | 53  | 48  | 44  | 47  | 43  |
| 20  | 23  | 28  | 16  | 17  | 15  | 20  | 26  | 21  | 12  |
| 94  | 94  | 76  | 104 | 122 | 126 | 136 | 94  | 111 | 84  |
| 58  | 68  | 72  | 146 | 209 | 174 | 193 | 145 | 190 | 103 |
| 70  | 55  | 67  | 278 | 332 | 268 | 179 | 175 | 199 | 93  |
| 42  | 38  | 48  | 43  | 37  | 41  | 56  | 69  | 63  | 34  |
| 103 | 109 | 111 | 102 | 134 | 112 | 191 | 206 | 187 | 125 |
| 29  | 24  | 38  | 34  | 29  | 33  | 42  | 44  | 42  | 27  |
| 78  | 69  | 73  | 367 | 483 | 381 | 344 | 277 | 371 | 183 |
| 34  | 30  | 25  | 34  | 33  | 34  | 46  | 32  | 46  | 21  |
| 52  | 48  | 65  | 89  | 116 | 105 | 105 | 118 | 129 | 62  |
| 17  | 25  | 13  | 61  | 70  | 70  | 76  | 65  | 78  | 30  |
| 18  | 15  | 21  | 34  | 29  | 33  | 54  | 56  | 38  | 24  |
| 13  | 9   | 12  | 13  | 17  | 14  | 22  | 20  | 16  | 13  |
| 30  | 24  | 36  | 49  | 48  | 47  | 63  | 65  | 55  | 30  |
| 5   | 6   | 5   | 17  | 20  | 19  | 29  | 23  | 23  | 15  |
| 28  | 25  | 23  | 54  | 69  | 58  | 72  | 66  | 71  | 43  |
| 62  | 85  | 80  | 172 | 218 | 218 | 254 | 221 | 244 | 119 |
| 66  | 56  | 69  | 89  | 105 | 101 | 135 | 101 | 121 | 70  |

|     |     |     |     |     |     |     |     |     |     |
|-----|-----|-----|-----|-----|-----|-----|-----|-----|-----|
| 16  | 11  | 17  | 17  | 31  | 27  | 18  | 20  | 18  | 12  |
| 23  | 30  | 38  | 56  | 60  | 52  | 70  | 45  | 74  | 29  |
| 39  | 34  | 34  | 99  | 119 | 94  | 97  | 92  | 95  | 35  |
| 47  | 51  | 70  | 58  | 86  | 80  | 105 | 82  | 93  | 70  |
| 56  | 55  | 82  | 31  | 50  | 51  | 56  | 59  | 52  | 60  |
| 70  | 75  | 86  | 99  | 137 | 83  | 138 | 118 | 103 | 76  |
| 66  | 77  | 81  | 216 | 286 | 255 | 243 | 226 | 260 | 116 |
| 78  | 81  | 80  | 72  | 68  | 90  | 109 | 86  | 109 | 57  |
| 41  | 41  | 52  | 120 | 134 | 115 | 135 | 118 | 166 | 77  |
| 25  | 26  | 26  | 25  | 16  | 35  | 24  | 31  | 29  | 23  |
| 70  | 56  | 62  | 38  | 63  | 49  | 35  | 42  | 47  | 32  |
| 17  | 15  | 17  | 26  | 24  | 29  | 42  | 42  | 30  | 20  |
| 56  | 42  | 52  | 55  | 63  | 67  | 80  | 78  | 84  | 57  |
| 54  | 46  | 51  | 56  | 46  | 60  | 45  | 35  | 47  | 37  |
| 56  | 58  | 78  | 82  | 110 | 93  | 96  | 92  | 100 | 59  |
| 23  | 29  | 18  | 19  | 36  | 32  | 18  | 19  | 31  | 21  |
| 57  | 52  | 65  | 90  | 144 | 108 | 94  | 122 | 91  | 63  |
| 33  | 33  | 43  | 98  | 114 | 108 | 127 | 125 | 144 | 60  |
| 97  | 114 | 102 | 132 | 180 | 180 | 171 | 173 | 166 | 126 |
| 48  | 38  | 45  | 106 | 113 | 108 | 98  | 84  | 110 | 58  |
| 47  | 67  | 54  | 79  | 95  | 77  | 93  | 80  | 104 | 38  |
| 92  | 69  | 77  | 316 | 465 | 384 | 338 | 310 | 323 | 180 |
| 35  | 35  | 47  | 155 | 178 | 139 | 160 | 158 | 151 | 93  |
| 88  | 90  | 93  | 208 | 309 | 279 | 276 | 270 | 278 | 138 |
| 36  | 49  | 52  | 95  | 110 | 114 | 113 | 90  | 107 | 74  |
| 55  | 50  | 41  | 60  | 74  | 73  | 76  | 55  | 68  | 66  |
| 32  | 56  | 72  | 135 | 191 | 182 | 145 | 119 | 107 | 88  |
| 26  | 26  | 43  | 70  | 91  | 89  | 72  | 59  | 75  | 44  |
| 37  | 43  | 40  | 49  | 61  | 55  | 48  | 36  | 47  | 39  |
| 85  | 103 | 88  | 85  | 94  | 88  | 80  | 46  | 66  | 62  |
| 45  | 72  | 70  | 68  | 98  | 83  | 106 | 108 | 99  | 70  |
| 30  | 47  | 64  | 67  | 89  | 76  | 81  | 60  | 66  | 48  |
| 46  | 52  | 50  | 46  | 49  | 52  | 47  | 54  | 51  | 53  |
| 54  | 66  | 55  | 92  | 125 | 102 | 93  | 92  | 119 | 73  |
| 54  | 55  | 53  | 83  | 96  | 90  | 105 | 99  | 95  | 65  |
| 70  | 61  | 54  | 73  | 93  | 78  | 78  | 65  | 78  | 60  |
| 40  | 39  | 51  | 37  | 69  | 49  | 56  | 44  | 49  | 48  |
| 35  | 32  | 50  | 121 | 127 | 102 | 137 | 107 | 141 | 76  |
| 43  | 35  | 45  | 34  | 54  | 54  | 43  | 39  | 35  | 37  |
| 42  | 36  | 34  | 75  | 97  | 66  | 60  | 58  | 41  | 36  |
| 113 | 125 | 111 | 169 | 202 | 206 | 279 | 251 | 288 | 164 |

|     |     |     |     |     |     |     |     |     |     |
|-----|-----|-----|-----|-----|-----|-----|-----|-----|-----|
| 90  | 109 | 142 | 123 | 164 | 118 | 133 | 121 | 144 | 102 |
| 108 | 109 | 98  | 107 | 122 | 94  | 133 | 88  | 118 | 98  |
| 33  | 32  | 45  | 53  | 95  | 41  | 69  | 45  | 66  | 38  |
| 29  | 27  | 25  | 45  | 59  | 44  | 43  | 38  | 36  | 35  |
| 46  | 42  | 30  | 91  | 123 | 106 | 77  | 69  | 78  | 48  |
| 59  | 59  | 70  | 102 | 121 | 96  | 110 | 103 | 92  | 59  |
| 43  | 45  | 46  | 42  | 60  | 59  | 52  | 56  | 56  | 54  |
| 32  | 32  | 25  | 25  | 33  | 39  | 23  | 19  | 24  | 19  |
| 27  | 28  | 38  | 128 | 154 | 165 | 119 | 90  | 107 | 48  |
| 38  | 33  | 54  | 104 | 117 | 120 | 92  | 117 | 106 | 61  |
| 70  | 70  | 70  | 132 | 156 | 114 | 107 | 78  | 107 | 59  |
| 73  | 75  | 78  | 202 | 253 | 247 | 153 | 147 | 167 | 90  |
| 61  | 44  | 58  | 100 | 127 | 136 | 105 | 93  | 73  | 49  |
| 40  | 48  | 33  | 53  | 64  | 49  | 56  | 44  | 55  | 48  |
| 16  | 16  | 23  | 22  | 31  | 25  | 18  | 18  | 19  | 18  |
| 28  | 26  | 35  | 32  | 32  | 34  | 23  | 23  | 32  | 24  |
| 32  | 51  | 38  | 39  | 58  | 53  | 62  | 60  | 59  | 31  |
| 32  | 40  | 34  | 47  | 62  | 51  | 64  | 66  | 67  | 32  |
| 8   | 12  | 14  | 19  | 15  | 19  | 11  | 16  | 14  | 13  |
| 26  | 32  | 28  | 51  | 60  | 61  | 61  | 48  | 50  | 24  |
| 31  | 43  | 36  | 75  | 76  | 75  | 83  | 84  | 92  | 52  |
| 10  | 12  | 14  | 13  | 15  | 7   | 11  | 11  | 13  | 12  |
| 32  | 46  | 41  | 32  | 61  | 26  | 35  | 24  | 34  | 31  |
| 35  | 26  | 37  | 22  | 38  | 17  | 21  | 18  | 29  | 27  |
| 6   | 6   | 7   | 11  | 28  | 17  | 10  | 14  | 10  | 4   |
| 45  | 38  | 41  | 23  | 31  | 32  | 39  | 43  | 41  | 32  |
| 24  | 41  | 42  | 73  | 90  | 58  | 78  | 76  | 90  | 32  |
| 32  | 35  | 38  | 34  | 46  | 41  | 45  | 39  | 57  | 29  |
| 55  | 49  | 44  | 75  | 97  | 79  | 69  | 54  | 67  | 60  |
| 51  | 59  | 54  | 147 | 172 | 131 | 97  | 67  | 73  | 55  |
| 18  | 16  | 19  | 20  | 21  | 27  | 29  | 12  | 16  | 17  |
| 48  | 52  | 51  | 41  | 53  | 46  | 57  | 51  | 58  | 35  |
| 32  | 45  | 41  | 91  | 100 | 91  | 68  | 61  | 73  | 38  |
| 32  | 28  | 23  | 86  | 114 | 78  | 60  | 67  | 62  | 40  |
| 21  | 24  | 25  | 86  | 88  | 79  | 82  | 72  | 79  | 47  |
| 8   | 13  | 15  | 37  | 38  | 40  | 28  | 19  | 20  | 15  |
| 27  | 11  | 24  | 33  | 38  | 35  | 29  | 28  | 22  | 15  |
| 42  | 47  | 50  | 65  | 97  | 71  | 76  | 70  | 62  | 35  |
| 46  | 43  | 46  | 84  | 126 | 104 | 110 | 72  | 96  | 72  |
| 35  | 49  | 44  | 63  | 69  | 76  | 55  | 54  | 58  | 47  |
| 53  | 54  | 45  | 54  | 42  | 49  | 57  | 62  | 73  | 50  |

|     |     |     |     |     |     |     |     |     |     |
|-----|-----|-----|-----|-----|-----|-----|-----|-----|-----|
| 116 | 104 | 91  | 121 | 146 | 112 | 131 | 123 | 144 | 110 |
| 52  | 70  | 57  | 69  | 85  | 77  | 56  | 66  | 66  | 43  |
| 52  | 66  | 48  | 75  | 95  | 89  | 116 | 96  | 111 | 68  |
| 27  | 32  | 36  | 68  | 72  | 57  | 35  | 28  | 35  | 39  |
| 40  | 47  | 37  | 171 | 235 | 204 | 109 | 101 | 137 | 61  |
| 71  | 50  | 73  | 117 | 174 | 142 | 172 | 131 | 151 | 86  |
| 76  | 60  | 73  | 123 | 174 | 179 | 173 | 163 | 201 | 92  |
| 48  | 40  | 39  | 164 | 196 | 188 | 110 | 89  | 106 | 68  |
| 42  | 35  | 48  | 72  | 104 | 75  | 89  | 84  | 70  | 47  |
| 7   | 7   | 9   | 73  | 90  | 87  | 36  | 29  | 37  | 16  |
| 19  | 19  | 31  | 57  | 84  | 55  | 49  | 46  | 45  | 26  |
| 46  | 47  | 55  | 62  | 103 | 82  | 69  | 57  | 74  | 55  |
| 45  | 47  | 45  | 152 | 193 | 164 | 165 | 123 | 122 | 75  |
| 64  | 75  | 93  | 191 | 263 | 228 | 248 | 225 | 237 | 135 |
| 18  | 13  | 21  | 72  | 119 | 74  | 58  | 51  | 68  | 29  |
| 14  | 23  | 23  | 127 | 168 | 115 | 115 | 108 | 110 | 40  |
| 28  | 26  | 35  | 56  | 64  | 50  | 45  | 47  | 56  | 39  |
| 55  | 51  | 65  | 61  | 71  | 67  | 62  | 50  | 64  | 48  |
| 18  | 22  | 21  | 34  | 40  | 46  | 26  | 34  | 29  | 22  |
| 42  | 47  | 41  | 121 | 170 | 185 | 183 | 152 | 194 | 86  |
| 91  | 85  | 106 | 80  | 99  | 88  | 114 | 91  | 113 | 79  |
| 26  | 18  | 28  | 25  | 47  | 41  | 49  | 38  | 37  | 21  |
| 67  | 59  | 71  | 71  | 115 | 101 | 106 | 94  | 120 | 55  |
| 31  | 51  | 48  | 72  | 92  | 75  | 77  | 70  | 68  | 45  |
| 37  | 45  | 45  | 37  | 36  | 37  | 40  | 43  | 46  | 37  |
| 31  | 20  | 33  | 21  | 38  | 23  | 41  | 42  | 31  | 34  |
| 17  | 24  | 27  | 20  | 19  | 14  | 29  | 35  | 22  | 27  |
| 100 | 112 | 103 | 115 | 165 | 158 | 169 | 143 | 184 | 141 |
| 117 | 102 | 120 | 119 | 181 | 133 | 178 | 140 | 166 | 132 |
| 83  | 71  | 100 | 106 | 121 | 95  | 99  | 112 | 130 | 110 |
| 101 | 111 | 130 | 237 | 290 | 267 | 186 | 141 | 176 | 145 |
| 139 | 146 | 153 | 114 | 190 | 153 | 176 | 152 | 162 | 163 |
| 64  | 76  | 94  | 105 | 115 | 108 | 103 | 99  | 100 | 73  |
| 32  | 43  | 42  | 91  | 130 | 104 | 35  | 37  | 58  | 38  |
| 51  | 64  | 76  | 172 | 218 | 169 | 64  | 52  | 65  | 41  |
| 53  | 57  | 56  | 113 | 148 | 153 | 142 | 123 | 162 | 83  |
| 90  | 86  | 71  | 99  | 99  | 117 | 152 | 176 | 163 | 103 |
| 43  | 25  | 48  | 40  | 45  | 45  | 45  | 44  | 44  | 45  |
| 46  | 36  | 52  | 65  | 68  | 76  | 60  | 49  | 62  | 37  |
| 52  | 53  | 60  | 97  | 109 | 82  | 105 | 85  | 99  | 59  |
| 58  | 54  | 85  | 131 | 161 | 124 | 95  | 70  | 75  | 61  |

|    |    |     |     |     |     |     |     |     |     |
|----|----|-----|-----|-----|-----|-----|-----|-----|-----|
| 59 | 59 | 71  | 104 | 156 | 131 | 135 | 127 | 152 | 74  |
| 28 | 27 | 37  | 59  | 77  | 63  | 77  | 76  | 69  | 39  |
| 77 | 70 | 107 | 247 | 358 | 295 | 284 | 249 | 303 | 126 |
| 47 | 56 | 52  | 194 | 299 | 266 | 250 | 179 | 214 | 110 |
| 35 | 26 | 34  | 69  | 96  | 99  | 120 | 76  | 102 | 46  |
| 17 | 19 | 20  | 42  | 41  | 43  | 42  | 24  | 50  | 24  |
| 35 | 40 | 52  | 126 | 131 | 120 | 134 | 116 | 140 | 63  |
| 42 | 59 | 68  | 127 | 216 | 177 | 190 | 165 | 219 | 86  |
| 1  | 6  | 5   | 44  | 43  | 42  | 17  | 18  | 14  | 10  |
| 9  | 6  | 8   | 11  | 23  | 18  | 13  | 15  | 19  | 12  |
| 73 | 76 | 64  | 78  | 101 | 75  | 69  | 56  | 74  | 65  |
| 63 | 40 | 67  | 174 | 224 | 211 | 218 | 174 | 209 | 101 |
| 58 | 55 | 83  | 74  | 146 | 83  | 104 | 84  | 118 | 63  |
| 19 | 11 | 15  | 43  | 46  | 29  | 19  | 14  | 20  | 10  |
| 37 | 21 | 25  | 63  | 77  | 65  | 74  | 65  | 57  | 39  |
| 29 | 24 | 30  | 43  | 41  | 35  | 22  | 27  | 26  | 21  |
| 40 | 33 | 35  | 33  | 55  | 50  | 44  | 45  | 31  | 33  |
| 25 | 36 | 37  | 68  | 98  | 50  | 63  | 47  | 56  | 40  |
| 45 | 50 | 49  | 102 | 139 | 115 | 104 | 91  | 101 | 61  |
| 62 | 56 | 67  | 138 | 182 | 147 | 140 | 137 | 134 | 85  |
| 40 | 31 | 49  | 73  | 106 | 91  | 84  | 77  | 99  | 57  |
| 45 | 50 | 40  | 57  | 63  | 70  | 50  | 54  | 61  | 38  |
| 63 | 55 | 72  | 64  | 91  | 70  | 85  | 84  | 104 | 60  |
| 53 | 62 | 84  | 113 | 163 | 113 | 198 | 191 | 215 | 106 |
| 38 | 39 | 33  | 141 | 179 | 145 | 120 | 126 | 146 | 74  |
| 28 | 29 | 43  | 65  | 123 | 103 | 84  | 67  | 78  | 37  |
| 25 | 43 | 41  | 44  | 77  | 60  | 61  | 59  | 69  | 48  |
| 25 | 34 | 45  | 123 | 154 | 134 | 116 | 107 | 121 | 44  |
| 54 | 47 | 62  | 85  | 120 | 106 | 96  | 74  | 89  | 59  |
| 27 | 36 | 34  | 86  | 126 | 107 | 111 | 111 | 119 | 62  |
| 26 | 11 | 19  | 24  | 32  | 26  | 11  | 16  | 14  | 16  |
| 20 | 24 | 27  | 77  | 112 | 102 | 92  | 80  | 103 | 37  |
| 28 | 26 | 39  | 60  | 80  | 79  | 72  | 77  | 84  | 43  |
| 27 | 28 | 44  | 29  | 31  | 28  | 13  | 16  | 20  | 31  |
| 25 | 25 | 29  | 28  | 41  | 40  | 48  | 42  | 45  | 20  |
| 34 | 45 | 44  | 49  | 71  | 57  | 77  | 63  | 73  | 33  |
| 47 | 51 | 46  | 85  | 106 | 90  | 79  | 73  | 76  | 45  |
| 14 | 24 | 18  | 13  | 15  | 9   | 22  | 14  | 20  | 7   |
| 42 | 43 | 54  | 192 | 221 | 172 | 274 | 199 | 245 | 113 |
| 50 | 56 | 62  | 107 | 111 | 103 | 165 | 134 | 158 | 93  |
| 59 | 62 | 47  | 46  | 72  | 59  | 59  | 46  | 62  | 73  |

|    |    |    |     |     |     |     |     |     |    |
|----|----|----|-----|-----|-----|-----|-----|-----|----|
| 61 | 66 | 53 | 106 | 113 | 120 | 156 | 172 | 158 | 71 |
| 54 | 49 | 55 | 31  | 55  | 45  | 55  | 42  | 63  | 42 |
| 37 | 54 | 50 | 46  | 52  | 59  | 55  | 48  | 61  | 40 |
| 36 | 43 | 40 | 22  | 38  | 41  | 33  | 24  | 28  | 39 |
| 53 | 42 | 51 | 34  | 47  | 39  | 53  | 42  | 38  | 54 |
| 37 | 29 | 32 | 41  | 89  | 87  | 87  | 82  | 88  | 33 |
| 41 | 43 | 42 | 58  | 70  | 92  | 72  | 55  | 54  | 43 |
| 58 | 61 | 76 | 44  | 65  | 57  | 61  | 54  | 55  | 54 |
| 31 | 37 | 42 | 55  | 76  | 51  | 54  | 50  | 51  | 41 |
| 52 | 39 | 50 | 64  | 78  | 68  | 86  | 55  | 78  | 60 |
| 63 | 64 | 63 | 94  | 132 | 117 | 107 | 113 | 117 | 80 |
| 19 | 11 | 24 | 30  | 29  | 37  | 38  | 24  | 34  | 25 |
| 42 | 42 | 40 | 80  | 109 | 84  | 94  | 95  | 105 | 53 |
| 40 | 43 | 56 | 103 | 156 | 128 | 80  | 72  | 81  | 63 |
| 33 | 34 | 52 | 121 | 147 | 93  | 131 | 131 | 139 | 46 |
| 73 | 62 | 90 | 136 | 164 | 140 | 156 | 171 | 181 | 93 |
| 45 | 37 | 44 | 147 | 188 | 158 | 133 | 116 | 154 | 63 |
| 41 | 36 | 47 | 83  | 98  | 95  | 101 | 84  | 101 | 61 |
| 28 | 34 | 37 | 41  | 52  | 42  | 53  | 38  | 44  | 32 |
| 14 | 12 | 8  | 4   | 7   | 6   | 10  | 8   | 5   | 7  |
| 44 | 38 | 53 | 52  | 73  | 61  | 68  | 57  | 53  | 32 |
| 78 | 81 | 81 | 88  | 115 | 107 | 99  | 104 | 113 | 67 |
| 53 | 66 | 66 | 154 | 165 | 147 | 167 | 138 | 147 | 75 |
| 49 | 56 | 67 | 120 | 143 | 132 | 142 | 140 | 134 | 81 |
| 38 | 46 | 47 | 101 | 100 | 110 | 132 | 128 | 165 | 60 |
| 31 | 23 | 27 | 20  | 24  | 14  | 13  | 16  | 15  | 22 |
| 25 | 32 | 35 | 41  | 53  | 42  | 68  | 44  | 51  | 43 |
| 63 | 62 | 79 | 60  | 72  | 65  | 80  | 67  | 71  | 71 |
| 39 | 40 | 29 | 20  | 35  | 37  | 36  | 39  | 42  | 27 |
| 54 | 58 | 66 | 106 | 108 | 118 | 100 | 102 | 114 | 67 |
| 34 | 23 | 33 | 43  | 76  | 50  | 86  | 78  | 84  | 40 |
| 32 | 38 | 34 | 78  | 78  | 64  | 103 | 101 | 90  | 48 |
| 58 | 50 | 51 | 98  | 120 | 109 | 112 | 125 | 126 | 83 |
| 26 | 13 | 27 | 13  | 14  | 15  | 20  | 15  | 13  | 11 |
| 24 | 22 | 27 | 25  | 47  | 28  | 35  | 23  | 23  | 27 |
| 27 | 24 | 31 | 53  | 63  | 71  | 30  | 19  | 29  | 20 |
| 19 | 35 | 37 | 64  | 96  | 85  | 75  | 55  | 64  | 44 |
| 36 | 29 | 37 | 72  | 99  | 73  | 94  | 62  | 85  | 60 |
| 21 | 14 | 16 | 38  | 34  | 30  | 29  | 27  | 22  | 18 |
| 50 | 42 | 54 | 35  | 47  | 34  | 31  | 39  | 45  | 37 |
| 25 | 30 | 35 | 38  | 53  | 50  | 32  | 23  | 28  | 36 |



|    |    |     |     |     |     |     |     |     |     |
|----|----|-----|-----|-----|-----|-----|-----|-----|-----|
| 37 | 38 | 56  | 38  | 37  | 48  | 43  | 41  | 37  | 30  |
| 22 | 25 | 25  | 21  | 46  | 19  | 28  | 25  | 26  | 19  |
| 71 | 58 | 63  | 86  | 79  | 85  | 61  | 62  | 60  | 59  |
| 60 | 67 | 53  | 61  | 67  | 64  | 77  | 66  | 67  | 58  |
| 34 | 33 | 47  | 51  | 50  | 39  | 42  | 33  | 28  | 39  |
| 53 | 57 | 45  | 47  | 56  | 48  | 56  | 43  | 48  | 54  |
| 56 | 42 | 53  | 38  | 65  | 61  | 75  | 59  | 70  | 36  |
| 51 | 53 | 68  | 47  | 61  | 83  | 53  | 66  | 75  | 51  |
| 36 | 39 | 47  | 71  | 95  | 85  | 87  | 78  | 83  | 52  |
| 62 | 48 | 67  | 73  | 99  | 73  | 62  | 47  | 43  | 47  |
| 16 | 15 | 14  | 13  | 25  | 15  | 14  | 15  | 14  | 8   |
| 33 | 36 | 41  | 74  | 83  | 70  | 94  | 87  | 91  | 48  |
| 35 | 31 | 31  | 50  | 54  | 47  | 54  | 47  | 42  | 36  |
| 53 | 50 | 46  | 110 | 127 | 128 | 110 | 101 | 122 | 46  |
| 37 | 40 | 43  | 55  | 75  | 45  | 44  | 48  | 46  | 24  |
| 40 | 35 | 28  | 40  | 40  | 45  | 32  | 25  | 40  | 26  |
| 22 | 27 | 35  | 48  | 61  | 56  | 52  | 40  | 45  | 28  |
| 32 | 25 | 32  | 63  | 85  | 88  | 54  | 67  | 62  | 33  |
| 48 | 55 | 60  | 115 | 125 | 135 | 92  | 65  | 90  | 57  |
| 36 | 36 | 34  | 93  | 104 | 95  | 63  | 66  | 68  | 42  |
| 22 | 13 | 16  | 60  | 74  | 72  | 39  | 41  | 55  | 17  |
| 38 | 29 | 34  | 46  | 67  | 44  | 58  | 46  | 53  | 28  |
| 4  | 12 | 12  | 12  | 14  | 13  | 13  | 9   | 10  | 13  |
| 82 | 82 | 75  | 95  | 117 | 120 | 149 | 139 | 139 | 104 |
| 77 | 77 | 83  | 316 | 375 | 341 | 373 | 382 | 441 | 207 |
| 89 | 86 | 111 | 91  | 107 | 101 | 125 | 106 | 125 | 89  |
| 43 | 48 | 50  | 101 | 104 | 100 | 124 | 101 | 110 | 65  |
| 67 | 59 | 73  | 113 | 156 | 137 | 149 | 135 | 148 | 85  |
| 67 | 56 | 52  | 173 | 204 | 180 | 123 | 134 | 121 | 79  |
| 30 | 34 | 45  | 34  | 64  | 75  | 56  | 47  | 39  | 38  |
| 68 | 62 | 75  | 92  | 119 | 127 | 86  | 103 | 100 | 76  |
| 60 | 66 | 70  | 87  | 120 | 122 | 127 | 111 | 119 | 73  |
| 35 | 40 | 45  | 63  | 75  | 60  | 70  | 47  | 51  | 34  |
| 76 | 91 | 72  | 210 | 256 | 211 | 316 | 262 | 303 | 145 |
| 47 | 43 | 41  | 69  | 71  | 57  | 84  | 57  | 80  | 36  |
| 57 | 42 | 51  | 230 | 261 | 234 | 266 | 229 | 242 | 114 |
| 46 | 39 | 40  | 57  | 50  | 46  | 69  | 62  | 68  | 46  |
| 40 | 48 | 52  | 73  | 98  | 82  | 83  | 76  | 72  | 38  |
| 31 | 20 | 34  | 40  | 49  | 46  | 51  | 56  | 46  | 29  |
| 39 | 29 | 31  | 99  | 137 | 99  | 133 | 129 | 145 | 76  |
| 40 | 26 | 38  | 34  | 55  | 58  | 48  | 47  | 45  | 37  |

|    |     |     |     |     |     |     |     |     |     |
|----|-----|-----|-----|-----|-----|-----|-----|-----|-----|
| 18 | 16  | 12  | 19  | 28  | 21  | 17  | 20  | 21  | 17  |
| 32 | 35  | 45  | 51  | 54  | 45  | 53  | 49  | 48  | 30  |
| 11 | 10  | 15  | 19  | 14  | 16  | 11  | 12  | 15  | 9   |
| 13 | 16  | 21  | 65  | 89  | 79  | 60  | 73  | 46  | 31  |
| 7  | 5   | 7   | 12  | 11  | 7   | 5   | 5   | 6   | 3   |
| 24 | 29  | 26  | 52  | 61  | 63  | 69  | 54  | 72  | 35  |
| 48 | 40  | 60  | 118 | 124 | 120 | 105 | 97  | 104 | 63  |
| 36 | 37  | 40  | 90  | 119 | 86  | 85  | 68  | 82  | 35  |
| 59 | 54  | 68  | 89  | 129 | 91  | 118 | 104 | 99  | 70  |
| 55 | 56  | 63  | 126 | 155 | 94  | 141 | 119 | 146 | 61  |
| 55 | 29  | 39  | 58  | 65  | 65  | 87  | 76  | 70  | 52  |
| 36 | 72  | 56  | 74  | 80  | 75  | 103 | 93  | 95  | 73  |
| 35 | 29  | 24  | 35  | 32  | 30  | 35  | 26  | 37  | 29  |
| 49 | 58  | 71  | 137 | 174 | 129 | 185 | 176 | 188 | 90  |
| 81 | 68  | 83  | 48  | 53  | 53  | 35  | 55  | 65  | 46  |
| 28 | 34  | 35  | 94  | 130 | 103 | 93  | 86  | 89  | 45  |
| 45 | 57  | 45  | 72  | 82  | 83  | 77  | 80  | 66  | 47  |
| 38 | 41  | 34  | 33  | 52  | 48  | 33  | 47  | 43  | 41  |
| 93 | 96  | 99  | 130 | 208 | 171 | 231 | 203 | 225 | 131 |
| 61 | 68  | 51  | 70  | 55  | 64  | 72  | 68  | 64  | 47  |
| 26 | 36  | 38  | 69  | 76  | 84  | 91  | 64  | 70  | 43  |
| 40 | 51  | 47  | 67  | 93  | 103 | 86  | 91  | 98  | 42  |
| 61 | 63  | 55  | 86  | 126 | 95  | 74  | 71  | 98  | 70  |
| 38 | 17  | 26  | 35  | 27  | 37  | 29  | 42  | 36  | 31  |
| 37 | 32  | 50  | 39  | 52  | 38  | 30  | 34  | 24  | 30  |
| 91 | 106 | 135 | 90  | 116 | 113 | 86  | 90  | 96  | 88  |
| 36 | 45  | 49  | 35  | 45  | 49  | 16  | 25  | 33  | 29  |
| 34 | 47  | 39  | 84  | 80  | 65  | 87  | 73  | 76  | 42  |
| 34 | 42  | 64  | 76  | 102 | 72  | 82  | 75  | 114 | 58  |
| 55 | 32  | 54  | 94  | 100 | 94  | 90  | 78  | 103 | 60  |
| 39 | 48  | 48  | 124 | 131 | 117 | 130 | 122 | 105 | 65  |
| 61 | 59  | 72  | 96  | 152 | 139 | 152 | 114 | 128 | 76  |
| 36 | 35  | 39  | 89  | 103 | 104 | 78  | 82  | 96  | 54  |
| 66 | 55  | 68  | 144 | 211 | 164 | 147 | 156 | 157 | 80  |
| 61 | 64  | 82  | 200 | 236 | 185 | 244 | 211 | 254 | 139 |
| 37 | 49  | 43  | 105 | 129 | 123 | 145 | 113 | 138 | 68  |
| 53 | 78  | 67  | 133 | 199 | 144 | 141 | 131 | 130 | 80  |
| 83 | 79  | 86  | 74  | 105 | 88  | 93  | 92  | 100 | 102 |
| 44 | 47  | 62  | 122 | 132 | 112 | 94  | 117 | 113 | 61  |
| 40 | 45  | 50  | 62  | 61  | 61  | 68  | 55  | 63  | 32  |
| 74 | 84  | 87  | 83  | 117 | 80  | 116 | 123 | 127 | 64  |

|    |     |     |     |     |     |     |     |     |     |
|----|-----|-----|-----|-----|-----|-----|-----|-----|-----|
| 63 | 56  | 48  | 56  | 74  | 48  | 78  | 91  | 88  | 50  |
| 49 | 45  | 69  | 93  | 119 | 94  | 111 | 110 | 120 | 69  |
| 81 | 100 | 101 | 299 | 347 | 293 | 397 | 387 | 378 | 173 |
| 41 | 46  | 30  | 58  | 65  | 63  | 67  | 51  | 66  | 44  |
| 12 | 27  | 21  | 42  | 43  | 54  | 48  | 57  | 58  | 30  |
| 44 | 56  | 49  | 78  | 90  | 90  | 106 | 92  | 95  | 54  |
| 83 | 78  | 103 | 147 | 202 | 171 | 243 | 201 | 235 | 121 |
| 57 | 57  | 61  | 123 | 187 | 140 | 183 | 173 | 184 | 80  |
| 29 | 35  | 32  | 23  | 28  | 37  | 43  | 56  | 54  | 35  |
| 22 | 16  | 14  | 20  | 25  | 33  | 30  | 18  | 34  | 14  |
| 15 | 17  | 15  | 47  | 50  | 37  | 74  | 70  | 66  | 36  |
| 13 | 11  | 11  | 8   | 10  | 5   | 14  | 16  | 19  | 5   |
| 29 | 21  | 17  | 22  | 30  | 20  | 36  | 34  | 37  | 18  |
| 38 | 51  | 56  | 98  | 149 | 114 | 159 | 144 | 165 | 101 |
| 37 | 42  | 49  | 101 | 103 | 83  | 115 | 134 | 126 | 63  |
| 9  | 9   | 8   | 6   | 15  | 6   | 2   | 4   | 4   | 5   |
| 23 | 27  | 30  | 19  | 27  | 32  | 30  | 38  | 24  | 25  |
| 51 | 65  | 81  | 92  | 124 | 98  | 136 | 165 | 163 | 72  |
| 8  | 13  | 15  | 23  | 26  | 22  | 17  | 17  | 11  | 12  |
| 36 | 31  | 30  | 24  | 32  | 32  | 29  | 31  | 30  | 15  |
| 27 | 20  | 23  | 35  | 35  | 31  | 45  | 59  | 36  | 29  |
| 32 | 21  | 35  | 22  | 28  | 45  | 46  | 30  | 44  | 28  |
| 42 | 59  | 47  | 60  | 60  | 59  | 51  | 68  | 60  | 42  |
| 48 | 39  | 32  | 63  | 89  | 78  | 66  | 58  | 61  | 47  |
| 88 | 88  | 75  | 72  | 111 | 66  | 103 | 96  | 118 | 48  |
| 62 | 60  | 63  | 24  | 30  | 27  | 58  | 55  | 53  | 27  |
| 36 | 36  | 34  | 31  | 41  | 37  | 29  | 32  | 30  | 29  |
| 44 | 50  | 37  | 20  | 26  | 18  | 41  | 25  | 43  | 33  |
| 54 | 56  | 56  | 37  | 48  | 36  | 36  | 40  | 50  | 46  |
| 13 | 13  | 5   | 9   | 15  | 11  | 8   | 10  | 7   | 9   |
| 39 | 25  | 37  | 64  | 79  | 70  | 68  | 58  | 52  | 29  |
| 16 | 23  | 27  | 21  | 36  | 40  | 24  | 15  | 16  | 14  |
| 30 | 16  | 30  | 26  | 25  | 20  | 30  | 37  | 29  | 21  |
| 21 | 24  | 24  | 24  | 32  | 26  | 18  | 24  | 27  | 15  |
| 2  | 5   | 12  | 24  | 38  | 17  | 15  | 12  | 23  | 8   |
| 38 | 42  | 42  | 60  | 60  | 57  | 61  | 47  | 51  | 27  |
| 8  | 13  | 10  | 6   | 21  | 18  | 21  | 23  | 20  | 13  |
| 28 | 19  | 13  | 41  | 41  | 40  | 33  | 36  | 46  | 22  |
| 39 | 36  | 46  | 53  | 59  | 41  | 51  | 60  | 56  | 42  |
| 50 | 63  | 73  | 103 | 103 | 62  | 99  | 86  | 86  | 45  |
| 29 | 36  | 33  | 25  | 22  | 27  | 27  | 30  | 21  | 26  |

|     |    |    |     |     |     |     |     |     |     |
|-----|----|----|-----|-----|-----|-----|-----|-----|-----|
| 52  | 56 | 43 | 58  | 76  | 88  | 54  | 47  | 64  | 45  |
| 16  | 17 | 13 | 4   | 7   | 13  | 6   | 8   | 6   | 14  |
| 41  | 33 | 43 | 35  | 52  | 32  | 53  | 50  | 49  | 41  |
| 20  | 25 | 15 | 29  | 45  | 57  | 48  | 36  | 41  | 24  |
| 62  | 52 | 56 | 98  | 119 | 107 | 103 | 73  | 73  | 71  |
| 49  | 32 | 41 | 43  | 65  | 56  | 46  | 38  | 43  | 37  |
| 58  | 65 | 95 | 116 | 143 | 137 | 171 | 157 | 188 | 87  |
| 38  | 39 | 42 | 39  | 57  | 44  | 64  | 57  | 41  | 37  |
| 58  | 60 | 47 | 70  | 64  | 65  | 106 | 72  | 95  | 57  |
| 38  | 32 | 31 | 23  | 45  | 39  | 32  | 25  | 31  | 38  |
| 28  | 30 | 37 | 42  | 47  | 39  | 50  | 44  | 52  | 39  |
| 70  | 60 | 57 | 103 | 126 | 104 | 179 | 165 | 147 | 106 |
| 81  | 86 | 63 | 69  | 87  | 83  | 81  | 101 | 109 | 68  |
| 23  | 32 | 28 | 39  | 32  | 42  | 24  | 30  | 32  | 30  |
| 39  | 36 | 43 | 50  | 52  | 47  | 60  | 60  | 58  | 41  |
| 53  | 47 | 57 | 51  | 65  | 69  | 66  | 63  | 81  | 54  |
| 101 | 95 | 93 | 63  | 87  | 82  | 92  | 68  | 88  | 63  |
| 56  | 61 | 60 | 41  | 60  | 48  | 49  | 39  | 41  | 39  |
| 57  | 53 | 54 | 64  | 75  | 67  | 85  | 57  | 85  | 50  |
| 27  | 29 | 42 | 23  | 39  | 32  | 47  | 41  | 31  | 28  |
| 46  | 40 | 39 | 49  | 48  | 43  | 41  | 34  | 53  | 47  |
| 37  | 42 | 35 | 45  | 45  | 45  | 47  | 40  | 68  | 32  |
| 19  | 32 | 28 | 21  | 30  | 16  | 27  | 12  | 24  | 18  |
| 39  | 41 | 43 | 129 | 195 | 133 | 153 | 142 | 146 | 68  |
| 18  | 18 | 22 | 89  | 126 | 118 | 60  | 57  | 63  | 37  |
| 59  | 59 | 51 | 197 | 313 | 262 | 287 | 216 | 267 | 125 |
| 47  | 41 | 43 | 156 | 251 | 193 | 183 | 171 | 203 | 63  |
| 36  | 31 | 36 | 191 | 241 | 229 | 216 | 168 | 192 | 100 |
| 45  | 45 | 56 | 162 | 233 | 184 | 207 | 170 | 190 | 110 |
| 65  | 73 | 72 | 140 | 157 | 139 | 145 | 113 | 129 | 70  |
| 75  | 59 | 64 | 72  | 83  | 67  | 86  | 73  | 88  | 60  |
| 77  | 65 | 65 | 83  | 107 | 79  | 96  | 94  | 100 | 65  |
| 27  | 36 | 25 | 37  | 46  | 47  | 54  | 40  | 51  | 34  |
| 27  | 26 | 32 | 42  | 47  | 34  | 23  | 19  | 33  | 20  |
| 48  | 44 | 71 | 54  | 54  | 63  | 40  | 53  | 51  | 34  |
| 68  | 63 | 64 | 93  | 93  | 84  | 94  | 67  | 86  | 64  |
| 68  | 60 | 73 | 67  | 72  | 83  | 130 | 129 | 149 | 95  |
| 48  | 48 | 51 | 56  | 49  | 37  | 53  | 40  | 51  | 38  |
| 45  | 36 | 54 | 85  | 95  | 78  | 75  | 56  | 81  | 40  |
| 43  | 60 | 65 | 56  | 60  | 77  | 79  | 62  | 61  | 58  |
| 78  | 88 | 77 | 139 | 202 | 157 | 132 | 129 | 148 | 103 |

|     |     |     |     |     |     |     |     |     |     |
|-----|-----|-----|-----|-----|-----|-----|-----|-----|-----|
| 46  | 43  | 48  | 52  | 60  | 54  | 57  | 45  | 57  | 37  |
| 73  | 70  | 83  | 73  | 88  | 76  | 116 | 80  | 104 | 69  |
| 37  | 41  | 44  | 91  | 105 | 100 | 99  | 110 | 97  | 51  |
| 34  | 54  | 45  | 199 | 289 | 244 | 232 | 191 | 212 | 102 |
| 23  | 22  | 28  | 29  | 45  | 51  | 39  | 37  | 48  | 17  |
| 46  | 65  | 67  | 89  | 115 | 116 | 84  | 86  | 72  | 76  |
| 30  | 29  | 33  | 100 | 130 | 109 | 79  | 59  | 81  | 50  |
| 82  | 71  | 85  | 119 | 177 | 141 | 174 | 157 | 146 | 95  |
| 34  | 27  | 30  | 130 | 163 | 144 | 115 | 124 | 120 | 67  |
| 78  | 73  | 71  | 167 | 194 | 208 | 146 | 127 | 140 | 76  |
| 60  | 51  | 61  | 136 | 152 | 134 | 137 | 117 | 148 | 50  |
| 41  | 48  | 63  | 121 | 150 | 101 | 109 | 90  | 101 | 62  |
| 26  | 28  | 31  | 103 | 110 | 98  | 72  | 62  | 86  | 42  |
| 55  | 76  | 73  | 237 | 318 | 272 | 330 | 339 | 347 | 169 |
| 60  | 57  | 42  | 85  | 113 | 103 | 89  | 85  | 76  | 53  |
| 64  | 83  | 74  | 100 | 147 | 124 | 114 | 118 | 152 | 62  |
| 14  | 20  | 19  | 50  | 59  | 49  | 46  | 43  | 55  | 24  |
| 72  | 58  | 62  | 178 | 199 | 145 | 190 | 184 | 191 | 67  |
| 9   | 5   | 7   | 15  | 30  | 12  | 12  | 8   | 13  | 5   |
| 72  | 66  | 60  | 201 | 270 | 227 | 193 | 188 | 179 | 101 |
| 42  | 62  | 59  | 145 | 185 | 150 | 161 | 163 | 136 | 69  |
| 9   | 13  | 17  | 62  | 75  | 64  | 31  | 31  | 38  | 17  |
| 1   | 0   | 1   | 11  | 19  | 5   | 3   | 1   | 4   | 1   |
| 36  | 31  | 31  | 64  | 99  | 68  | 53  | 62  | 57  | 34  |
| 37  | 47  | 41  | 216 | 271 | 267 | 213 | 184 | 212 | 110 |
| 19  | 17  | 39  | 23  | 34  | 25  | 33  | 30  | 24  | 19  |
| 20  | 26  | 34  | 50  | 92  | 49  | 56  | 40  | 54  | 38  |
| 52  | 41  | 46  | 93  | 126 | 109 | 151 | 141 | 171 | 69  |
| 45  | 38  | 50  | 111 | 125 | 116 | 141 | 114 | 131 | 66  |
| 53  | 48  | 52  | 113 | 130 | 110 | 109 | 90  | 98  | 73  |
| 4   | 2   | 5   | 20  | 26  | 24  | 21  | 8   | 12  | 8   |
| 55  | 49  | 51  | 100 | 134 | 96  | 77  | 96  | 94  | 51  |
| 41  | 41  | 49  | 57  | 73  | 38  | 86  | 48  | 71  | 40  |
| 30  | 43  | 51  | 55  | 65  | 59  | 50  | 51  | 40  | 38  |
| 24  | 25  | 22  | 63  | 123 | 91  | 64  | 48  | 48  | 25  |
| 62  | 66  | 61  | 138 | 148 | 150 | 173 | 143 | 157 | 98  |
| 63  | 75  | 65  | 158 | 190 | 183 | 254 | 225 | 241 | 143 |
| 119 | 125 | 158 | 135 | 130 | 153 | 195 | 221 | 205 | 162 |
| 59  | 75  | 56  | 104 | 129 | 131 | 136 | 135 | 131 | 94  |
| 57  | 52  | 60  | 69  | 74  | 76  | 86  | 76  | 76  | 86  |
| 85  | 80  | 84  | 283 | 340 | 355 | 425 | 361 | 430 | 201 |

|     |     |     |     |     |     |     |     |     |     |
|-----|-----|-----|-----|-----|-----|-----|-----|-----|-----|
| 59  | 83  | 88  | 138 | 157 | 133 | 209 | 192 | 200 | 126 |
| 122 | 167 | 148 | 259 | 301 | 290 | 466 | 376 | 457 | 312 |
| 75  | 75  | 86  | 145 | 172 | 174 | 195 | 172 | 185 | 121 |
| 35  | 33  | 34  | 86  | 120 | 81  | 126 | 104 | 124 | 69  |
| 25  | 34  | 28  | 42  | 59  | 54  | 35  | 21  | 41  | 36  |
| 48  | 69  | 54  | 40  | 50  | 39  | 63  | 50  | 47  | 43  |
| 8   | 17  | 22  | 25  | 29  | 31  | 23  | 25  | 24  | 19  |
| 10  | 16  | 13  | 21  | 38  | 27  | 24  | 20  | 20  | 13  |
| 1   | 0   | 0   | 3   | 2   | 3   | 3   | 0   | 1   | 1   |
| 16  | 24  | 32  | 13  | 8   | 21  | 17  | 11  | 18  | 12  |
| 17  | 27  | 22  | 12  | 21  | 25  | 21  | 22  | 20  | 27  |
| 30  | 33  | 28  | 35  | 35  | 41  | 41  | 24  | 26  | 29  |
| 54  | 54  | 65  | 95  | 120 | 94  | 114 | 96  | 112 | 74  |
| 113 | 96  | 128 | 45  | 50  | 75  | 49  | 50  | 51  | 49  |
| 43  | 35  | 33  | 32  | 24  | 25  | 37  | 34  | 32  | 41  |
| 27  | 30  | 36  | 59  | 75  | 73  | 67  | 51  | 62  | 29  |
| 73  | 60  | 80  | 99  | 121 | 115 | 98  | 79  | 105 | 53  |
| 7   | 5   | 9   | 4   | 8   | 8   | 11  | 4   | 8   | 13  |
| 26  | 19  | 22  | 35  | 25  | 20  | 33  | 28  | 39  | 27  |
| 6   | 10  | 8   | 5   | 9   | 11  | 2   | 9   | 4   | 4   |
| 31  | 32  | 33  | 35  | 46  | 39  | 55  | 57  | 60  | 42  |
| 28  | 23  | 25  | 20  | 17  | 22  | 19  | 20  | 14  | 21  |
| 9   | 16  | 23  | 13  | 16  | 15  | 4   | 6   | 7   | 16  |
| 11  | 12  | 11  | 7   | 14  | 9   | 14  | 9   | 5   | 13  |
| 10  | 11  | 10  | 8   | 18  | 4   | 13  | 13  | 13  | 9   |
| 8   | 12  | 22  | 14  | 18  | 13  | 30  | 19  | 18  | 11  |
| 9   | 10  | 12  | 5   | 2   | 4   | 9   | 10  | 15  | 4   |
| 45  | 63  | 81  | 42  | 37  | 49  | 51  | 54  | 60  | 52  |
| 53  | 45  | 47  | 189 | 235 | 209 | 230 | 175 | 194 | 103 |
| 59  | 61  | 57  | 131 | 169 | 132 | 155 | 140 | 172 | 74  |
| 59  | 44  | 68  | 293 | 404 | 314 | 219 | 185 | 239 | 93  |
| 101 | 104 | 118 | 234 | 340 | 240 | 292 | 279 | 313 | 160 |
| 41  | 30  | 47  | 119 | 169 | 123 | 120 | 113 | 119 | 57  |
| 53  | 55  | 61  | 272 | 361 | 308 | 307 | 317 | 296 | 126 |
| 47  | 36  | 41  | 151 | 214 | 180 | 224 | 216 | 218 | 89  |
| 51  | 33  | 38  | 143 | 187 | 152 | 218 | 187 | 221 | 101 |
| 30  | 39  | 37  | 145 | 193 | 137 | 149 | 150 | 133 | 51  |
| 79  | 66  | 80  | 227 | 242 | 220 | 279 | 245 | 246 | 124 |
| 44  | 43  | 58  | 417 | 534 | 382 | 434 | 353 | 417 | 198 |
| 55  | 67  | 48  | 39  | 66  | 49  | 66  | 46  | 52  | 48  |
| 66  | 71  | 79  | 317 | 353 | 361 | 368 | 325 | 356 | 183 |

|     |     |     |     |     |     |     |     |     |     |
|-----|-----|-----|-----|-----|-----|-----|-----|-----|-----|
| 48  | 49  | 55  | 85  | 78  | 85  | 88  | 102 | 79  | 59  |
| 25  | 27  | 19  | 48  | 54  | 60  | 48  | 36  | 32  | 23  |
| 69  | 54  | 58  | 50  | 69  | 32  | 73  | 63  | 58  | 48  |
| 103 | 83  | 98  | 124 | 145 | 113 | 126 | 119 | 113 | 68  |
| 40  | 24  | 32  | 70  | 78  | 100 | 94  | 72  | 86  | 50  |
| 55  | 70  | 67  | 68  | 91  | 96  | 60  | 79  | 68  | 52  |
| 42  | 44  | 52  | 91  | 99  | 95  | 59  | 52  | 65  | 32  |
| 28  | 17  | 27  | 49  | 47  | 61  | 39  | 53  | 33  | 21  |
| 24  | 26  | 32  | 43  | 75  | 51  | 33  | 28  | 44  | 20  |
| 19  | 29  | 28  | 31  | 45  | 37  | 53  | 31  | 61  | 25  |
| 25  | 27  | 14  | 42  | 69  | 55  | 67  | 53  | 67  | 34  |
| 42  | 42  | 45  | 67  | 85  | 85  | 129 | 139 | 161 | 67  |
| 35  | 33  | 32  | 58  | 94  | 70  | 87  | 77  | 75  | 43  |
| 28  | 36  | 25  | 76  | 75  | 95  | 58  | 65  | 55  | 38  |
| 45  | 42  | 59  | 84  | 105 | 108 | 127 | 114 | 121 | 43  |
| 22  | 24  | 31  | 49  | 44  | 40  | 44  | 36  | 38  | 30  |
| 24  | 34  | 40  | 36  | 37  | 27  | 34  | 34  | 38  | 33  |
| 27  | 34  | 22  | 28  | 28  | 20  | 48  | 33  | 26  | 23  |
| 47  | 61  | 69  | 36  | 43  | 36  | 67  | 69  | 63  | 61  |
| 42  | 34  | 42  | 31  | 46  | 45  | 62  | 53  | 53  | 45  |
| 39  | 48  | 59  | 169 | 193 | 171 | 216 | 220 | 210 | 106 |
| 30  | 30  | 23  | 53  | 45  | 45  | 50  | 34  | 57  | 42  |
| 34  | 29  | 29  | 48  | 81  | 74  | 48  | 55  | 72  | 36  |
| 27  | 24  | 32  | 51  | 61  | 65  | 79  | 78  | 64  | 37  |
| 89  | 114 | 112 | 125 | 200 | 190 | 321 | 274 | 316 | 159 |
| 58  | 63  | 71  | 201 | 204 | 223 | 382 | 368 | 425 | 173 |
| 36  | 36  | 54  | 82  | 86  | 69  | 83  | 71  | 90  | 41  |
| 28  | 24  | 15  | 44  | 49  | 75  | 60  | 65  | 70  | 32  |
| 54  | 72  | 67  | 126 | 169 | 162 | 191 | 204 | 201 | 95  |
| 42  | 51  | 46  | 68  | 103 | 73  | 82  | 76  | 73  | 60  |
| 85  | 71  | 99  | 102 | 135 | 115 | 99  | 90  | 69  | 86  |
| 44  | 45  | 45  | 55  | 83  | 64  | 76  | 81  | 87  | 53  |
| 32  | 40  | 76  | 51  | 97  | 63  | 47  | 47  | 56  | 47  |
| 18  | 19  | 15  | 29  | 22  | 26  | 26  | 33  | 22  | 19  |
| 55  | 58  | 43  | 46  | 68  | 43  | 57  | 51  | 60  | 51  |
| 28  | 26  | 24  | 42  | 43  | 52  | 35  | 30  | 30  | 22  |
| 49  | 53  | 35  | 104 | 153 | 133 | 110 | 123 | 136 | 51  |
| 11  | 21  | 20  | 62  | 110 | 76  | 94  | 73  | 72  | 42  |
| 39  | 52  | 46  | 187 | 279 | 234 | 231 | 178 | 229 | 101 |
| 42  | 35  | 42  | 283 | 365 | 297 | 311 | 297 | 260 | 150 |
| 84  | 82  | 106 | 390 | 558 | 495 | 472 | 403 | 458 | 203 |

|     |     |     |     |     |     |     |     |     |     |
|-----|-----|-----|-----|-----|-----|-----|-----|-----|-----|
| 32  | 33  | 31  | 73  | 89  | 88  | 77  | 86  | 107 | 58  |
| 24  | 34  | 39  | 121 | 138 | 136 | 145 | 117 | 145 | 65  |
| 55  | 70  | 64  | 383 | 457 | 425 | 424 | 405 | 424 | 178 |
| 122 | 118 | 135 | 323 | 411 | 400 | 358 | 383 | 399 | 190 |
| 28  | 37  | 34  | 143 | 161 | 140 | 135 | 119 | 122 | 50  |
| 54  | 48  | 62  | 134 | 150 | 134 | 156 | 158 | 164 | 68  |
| 29  | 40  | 42  | 290 | 386 | 314 | 142 | 149 | 161 | 57  |
| 47  | 57  | 70  | 112 | 153 | 130 | 132 | 125 | 119 | 80  |
| 18  | 13  | 11  | 73  | 86  | 90  | 62  | 52  | 64  | 22  |
| 54  | 41  | 49  | 93  | 166 | 112 | 117 | 96  | 112 | 48  |
| 65  | 58  | 63  | 54  | 79  | 76  | 68  | 51  | 77  | 50  |
| 48  | 49  | 55  | 166 | 258 | 235 | 199 | 202 | 205 | 103 |
| 38  | 44  | 50  | 129 | 158 | 141 | 147 | 138 | 142 | 59  |
| 44  | 47  | 75  | 76  | 126 | 102 | 195 | 198 | 183 | 91  |
| 8   | 3   | 4   | 22  | 32  | 20  | 17  | 9   | 7   | 4   |
| 64  | 80  | 69  | 140 | 178 | 161 | 157 | 166 | 167 | 103 |
| 22  | 32  | 21  | 69  | 73  | 60  | 83  | 57  | 68  | 29  |
| 39  | 39  | 41  | 109 | 131 | 121 | 108 | 98  | 111 | 60  |
| 22  | 12  | 21  | 30  | 26  | 31  | 17  | 16  | 12  | 15  |
| 26  | 36  | 25  | 20  | 22  | 21  | 14  | 26  | 30  | 22  |
| 35  | 30  | 34  | 53  | 33  | 34  | 37  | 32  | 51  | 32  |
| 10  | 19  | 21  | 14  | 15  | 10  | 9   | 2   | 9   | 17  |
| 15  | 12  | 24  | 16  | 25  | 21  | 15  | 12  | 16  | 10  |
| 21  | 19  | 21  | 46  | 57  | 49  | 46  | 59  | 62  | 27  |
| 29  | 36  | 45  | 43  | 51  | 46  | 46  | 31  | 47  | 39  |
| 31  | 35  | 58  | 76  | 80  | 94  | 77  | 98  | 92  | 60  |
| 31  | 45  | 43  | 135 | 147 | 131 | 127 | 113 | 133 | 70  |
| 17  | 13  | 19  | 29  | 41  | 25  | 22  | 26  | 29  | 17  |
| 39  | 43  | 50  | 85  | 84  | 81  | 42  | 36  | 45  | 49  |
| 2   | 3   | 5   | 0   | 1   | 4   | 4   | 1   | 4   | 1   |
| 28  | 24  | 26  | 31  | 58  | 29  | 43  | 42  | 39  | 28  |
| 17  | 19  | 26  | 27  | 29  | 25  | 26  | 29  | 24  | 22  |
| 44  | 36  | 61  | 58  | 78  | 75  | 51  | 46  | 52  | 56  |
| 34  | 38  | 49  | 64  | 69  | 67  | 81  | 47  | 57  | 49  |
| 105 | 101 | 122 | 115 | 118 | 121 | 132 | 120 | 114 | 110 |
| 40  | 32  | 33  | 63  | 101 | 45  | 47  | 37  | 52  | 28  |
| 53  | 55  | 45  | 30  | 34  | 29  | 47  | 49  | 57  | 36  |
| 40  | 41  | 50  | 56  | 64  | 73  | 66  | 56  | 69  | 48  |
| 85  | 84  | 91  | 59  | 74  | 67  | 84  | 83  | 93  | 82  |
| 23  | 31  | 31  | 40  | 44  | 40  | 47  | 27  | 38  | 37  |
| 29  | 48  | 24  | 39  | 37  | 46  | 59  | 52  | 44  | 35  |



|    |    |    |     |     |     |     |     |     |     |
|----|----|----|-----|-----|-----|-----|-----|-----|-----|
| 39 | 35 | 37 | 80  | 74  | 75  | 56  | 66  | 67  | 43  |
| 45 | 37 | 54 | 68  | 76  | 77  | 92  | 86  | 98  | 59  |
| 13 | 11 | 11 | 3   | 2   | 5   | 2   | 3   | 4   | 10  |
| 59 | 42 | 43 | 59  | 80  | 70  | 64  | 54  | 58  | 41  |
| 17 | 28 | 32 | 14  | 15  | 19  | 15  | 12  | 22  | 18  |
| 38 | 29 | 22 | 28  | 40  | 36  | 29  | 20  | 27  | 31  |
| 38 | 37 | 37 | 36  | 47  | 42  | 36  | 42  | 42  | 30  |
| 9  | 15 | 12 | 4   | 21  | 10  | 18  | 9   | 13  | 15  |
| 20 | 16 | 28 | 3   | 2   | 6   | 2   | 5   | 9   | 12  |
| 23 | 17 | 28 | 28  | 35  | 32  | 27  | 19  | 14  | 20  |
| 20 | 38 | 29 | 21  | 34  | 27  | 32  | 29  | 42  | 31  |
| 49 | 59 | 58 | 101 | 125 | 111 | 154 | 113 | 118 | 76  |
| 69 | 70 | 62 | 104 | 143 | 117 | 152 | 116 | 119 | 68  |
| 44 | 37 | 48 | 54  | 79  | 58  | 46  | 52  | 67  | 44  |
| 42 | 48 | 58 | 38  | 43  | 48  | 41  | 22  | 46  | 29  |
| 26 | 29 | 22 | 50  | 58  | 47  | 46  | 42  | 57  | 34  |
| 46 | 42 | 57 | 77  | 101 | 93  | 85  | 64  | 92  | 51  |
| 36 | 47 | 44 | 62  | 74  | 69  | 64  | 64  | 78  | 43  |
| 30 | 49 | 43 | 38  | 53  | 43  | 40  | 25  | 31  | 29  |
| 69 | 82 | 73 | 106 | 178 | 137 | 141 | 124 | 124 | 85  |
| 36 | 43 | 56 | 74  | 76  | 89  | 52  | 45  | 49  | 42  |
| 90 | 85 | 85 | 58  | 75  | 63  | 59  | 66  | 66  | 87  |
| 57 | 44 | 41 | 66  | 97  | 91  | 86  | 78  | 103 | 54  |
| 17 | 16 | 22 | 36  | 34  | 32  | 20  | 29  | 30  | 23  |
| 24 | 28 | 19 | 61  | 103 | 78  | 59  | 63  | 63  | 39  |
| 57 | 55 | 45 | 62  | 58  | 54  | 67  | 54  | 79  | 74  |
| 63 | 74 | 66 | 110 | 130 | 131 | 135 | 104 | 124 | 75  |
| 78 | 88 | 95 | 234 | 320 | 267 | 403 | 343 | 361 | 162 |
| 32 | 41 | 34 | 116 | 128 | 135 | 137 | 116 | 129 | 70  |
| 59 | 61 | 60 | 137 | 190 | 143 | 163 | 161 | 183 | 90  |
| 32 | 32 | 41 | 48  | 79  | 62  | 54  | 49  | 60  | 38  |
| 53 | 40 | 79 | 71  | 85  | 79  | 85  | 105 | 97  | 61  |
| 52 | 69 | 50 | 107 | 119 | 129 | 107 | 92  | 142 | 75  |
| 72 | 70 | 49 | 157 | 184 | 149 | 169 | 126 | 130 | 87  |
| 13 | 17 | 18 | 20  | 39  | 27  | 28  | 18  | 41  | 19  |
| 29 | 36 | 50 | 98  | 135 | 104 | 92  | 82  | 98  | 49  |
| 28 | 16 | 32 | 50  | 72  | 64  | 65  | 64  | 62  | 46  |
| 36 | 43 | 32 | 47  | 49  | 47  | 53  | 54  | 53  | 49  |
| 14 | 20 | 27 | 39  | 56  | 53  | 44  | 33  | 43  | 38  |
| 44 | 68 | 56 | 85  | 118 | 120 | 82  | 107 | 97  | 52  |
| 34 | 31 | 30 | 46  | 56  | 48  | 49  | 31  | 56  | 34  |

|     |     |     |     |     |     |     |     |     |     |
|-----|-----|-----|-----|-----|-----|-----|-----|-----|-----|
| 48  | 45  | 47  | 42  | 67  | 54  | 40  | 62  | 42  | 28  |
| 38  | 45  | 58  | 57  | 85  | 71  | 87  | 66  | 78  | 43  |
| 24  | 36  | 29  | 32  | 41  | 34  | 32  | 27  | 30  | 24  |
| 30  | 22  | 25  | 35  | 24  | 41  | 30  | 38  | 27  | 28  |
| 30  | 16  | 18  | 21  | 19  | 14  | 11  | 7   | 12  | 13  |
| 30  | 31  | 33  | 46  | 63  | 53  | 49  | 41  | 37  | 28  |
| 55  | 46  | 50  | 50  | 75  | 79  | 88  | 63  | 73  | 48  |
| 52  | 56  | 64  | 102 | 130 | 119 | 144 | 109 | 139 | 89  |
| 52  | 55  | 51  | 59  | 113 | 84  | 62  | 60  | 68  | 48  |
| 55  | 59  | 58  | 88  | 103 | 79  | 141 | 119 | 149 | 77  |
| 58  | 51  | 62  | 105 | 125 | 117 | 125 | 118 | 113 | 69  |
| 53  | 80  | 68  | 75  | 87  | 69  | 88  | 88  | 90  | 62  |
| 26  | 46  | 36  | 56  | 79  | 52  | 38  | 19  | 29  | 24  |
| 73  | 53  | 67  | 103 | 126 | 96  | 150 | 118 | 133 | 67  |
| 44  | 45  | 46  | 61  | 65  | 57  | 72  | 65  | 65  | 44  |
| 40  | 34  | 51  | 100 | 131 | 96  | 109 | 87  | 107 | 65  |
| 19  | 20  | 39  | 140 | 201 | 137 | 111 | 96  | 115 | 43  |
| 35  | 39  | 51  | 95  | 116 | 98  | 95  | 83  | 79  | 49  |
| 17  | 19  | 21  | 40  | 45  | 41  | 35  | 38  | 42  | 23  |
| 44  | 57  | 57  | 80  | 91  | 64  | 88  | 86  | 106 | 61  |
| 25  | 16  | 21  | 18  | 26  | 18  | 20  | 24  | 30  | 25  |
| 46  | 27  | 23  | 43  | 63  | 54  | 53  | 53  | 61  | 28  |
| 58  | 49  | 44  | 56  | 81  | 70  | 72  | 55  | 83  | 35  |
| 113 | 123 | 127 | 111 | 132 | 124 | 150 | 114 | 143 | 114 |
| 42  | 43  | 43  | 43  | 56  | 56  | 51  | 46  | 56  | 41  |
| 81  | 74  | 66  | 69  | 91  | 76  | 95  | 84  | 113 | 75  |
| 81  | 98  | 94  | 282 | 324 | 321 | 403 | 385 | 393 | 205 |
| 48  | 68  | 51  | 77  | 116 | 92  | 96  | 108 | 101 | 72  |
| 19  | 23  | 27  | 8   | 10  | 9   | 13  | 13  | 15  | 23  |
| 8   | 12  | 9   | 21  | 15  | 16  | 7   | 18  | 16  | 19  |
| 18  | 14  | 20  | 13  | 11  | 12  | 16  | 18  | 20  | 21  |
| 20  | 32  | 32  | 21  | 16  | 28  | 24  | 33  | 46  | 31  |
| 51  | 51  | 60  | 45  | 56  | 44  | 49  | 64  | 63  | 46  |
| 55  | 41  | 40  | 84  | 91  | 65  | 126 | 94  | 124 | 69  |
| 32  | 29  | 27  | 38  | 46  | 56  | 93  | 56  | 82  | 42  |
| 41  | 39  | 38  | 44  | 71  | 62  | 76  | 68  | 82  | 47  |
| 43  | 34  | 47  | 38  | 34  | 39  | 50  | 58  | 52  | 42  |
| 22  | 15  | 15  | 6   | 6   | 9   | 13  | 17  | 15  | 13  |
| 56  | 41  | 51  | 56  | 53  | 56  | 36  | 48  | 46  | 31  |
| 39  | 55  | 47  | 29  | 37  | 33  | 43  | 38  | 53  | 41  |
| 48  | 48  | 71  | 74  | 99  | 94  | 107 | 118 | 85  | 66  |

|     |     |     |     |     |     |     |     |     |     |
|-----|-----|-----|-----|-----|-----|-----|-----|-----|-----|
| 60  | 60  | 52  | 121 | 151 | 131 | 118 | 127 | 134 | 75  |
| 51  | 55  | 50  | 67  | 97  | 89  | 79  | 70  | 77  | 50  |
| 54  | 56  | 59  | 36  | 49  | 38  | 56  | 59  | 70  | 54  |
| 51  | 50  | 48  | 75  | 78  | 78  | 69  | 57  | 56  | 33  |
| 72  | 70  | 73  | 46  | 62  | 53  | 70  | 70  | 73  | 54  |
| 39  | 37  | 47  | 86  | 97  | 89  | 64  | 66  | 79  | 49  |
| 33  | 36  | 32  | 50  | 60  | 69  | 44  | 38  | 38  | 32  |
| 40  | 56  | 59  | 55  | 65  | 54  | 56  | 58  | 62  | 38  |
| 34  | 26  | 30  | 34  | 48  | 42  | 50  | 34  | 40  | 22  |
| 52  | 43  | 56  | 204 | 200 | 188 | 165 | 154 | 142 | 73  |
| 35  | 31  | 36  | 40  | 54  | 38  | 34  | 23  | 36  | 40  |
| 142 | 128 | 134 | 106 | 151 | 111 | 164 | 163 | 166 | 117 |
| 126 | 181 | 172 | 239 | 310 | 265 | 372 | 328 | 328 | 213 |
| 185 | 176 | 209 | 229 | 267 | 274 | 257 | 229 | 258 | 198 |
| 111 | 112 | 115 | 132 | 175 | 147 | 159 | 139 | 156 | 118 |
| 81  | 94  | 98  | 63  | 111 | 53  | 72  | 71  | 61  | 54  |
| 110 | 88  | 119 | 88  | 136 | 101 | 145 | 137 | 165 | 95  |
| 45  | 44  | 48  | 50  | 75  | 58  | 54  | 51  | 73  | 38  |
| 90  | 89  | 95  | 74  | 93  | 93  | 93  | 99  | 122 | 81  |
| 122 | 127 | 145 | 129 | 140 | 140 | 148 | 122 | 136 | 129 |
| 14  | 18  | 11  | 30  | 42  | 20  | 48  | 23  | 28  | 8   |
| 56  | 42  | 47  | 68  | 94  | 97  | 70  | 82  | 85  | 42  |
| 29  | 22  | 35  | 83  | 95  | 79  | 79  | 77  | 75  | 50  |
| 12  | 7   | 10  | 28  | 28  | 17  | 44  | 39  | 45  | 14  |
| 11  | 16  | 18  | 27  | 24  | 12  | 28  | 31  | 31  | 22  |
| 19  | 21  | 23  | 24  | 28  | 28  | 17  | 23  | 28  | 18  |
| 29  | 37  | 33  | 32  | 49  | 33  | 36  | 55  | 47  | 31  |
| 12  | 16  | 21  | 16  | 18  | 21  | 36  | 27  | 28  | 24  |
| 33  | 16  | 24  | 27  | 24  | 16  | 19  | 18  | 17  | 19  |
| 36  | 31  | 18  | 37  | 52  | 57  | 71  | 67  | 75  | 40  |
| 14  | 18  | 13  | 22  | 24  | 27  | 24  | 21  | 25  | 15  |
| 71  | 74  | 80  | 89  | 114 | 110 | 137 | 129 | 150 | 72  |
| 47  | 38  | 49  | 77  | 98  | 89  | 103 | 101 | 104 | 58  |
| 39  | 37  | 45  | 73  | 84  | 83  | 93  | 67  | 96  | 41  |
| 48  | 73  | 58  | 61  | 74  | 69  | 89  | 70  | 90  | 62  |
| 77  | 73  | 113 | 84  | 98  | 90  | 97  | 78  | 86  | 77  |
| 46  | 56  | 58  | 42  | 52  | 54  | 61  | 75  | 76  | 47  |
| 33  | 33  | 32  | 27  | 23  | 33  | 37  | 31  | 32  | 25  |
| 76  | 91  | 85  | 368 | 469 | 432 | 585 | 511 | 548 | 220 |
| 33  | 37  | 34  | 93  | 113 | 89  | 122 | 114 | 126 | 41  |
| 27  | 15  | 18  | 85  | 104 | 79  | 65  | 66  | 68  | 28  |

|    |    |     |     |     |     |     |     |     |     |
|----|----|-----|-----|-----|-----|-----|-----|-----|-----|
| 35 | 29 | 40  | 92  | 62  | 62  | 75  | 67  | 72  | 34  |
| 56 | 31 | 53  | 79  | 108 | 84  | 83  | 79  | 83  | 40  |
| 19 | 13 | 25  | 35  | 30  | 34  | 47  | 64  | 60  | 17  |
| 38 | 55 | 45  | 192 | 220 | 198 | 168 | 172 | 187 | 105 |
| 74 | 53 | 58  | 136 | 183 | 142 | 165 | 159 | 196 | 81  |
| 59 | 47 | 50  | 73  | 96  | 85  | 75  | 76  | 71  | 43  |
| 57 | 53 | 58  | 111 | 122 | 105 | 147 | 127 | 157 | 82  |
| 41 | 55 | 47  | 61  | 80  | 76  | 70  | 62  | 99  | 65  |
| 37 | 42 | 42  | 48  | 77  | 68  | 54  | 54  | 58  | 32  |
| 43 | 39 | 55  | 71  | 97  | 67  | 80  | 87  | 99  | 57  |
| 39 | 36 | 49  | 71  | 91  | 75  | 66  | 52  | 66  | 40  |
| 57 | 58 | 68  | 87  | 81  | 69  | 73  | 88  | 76  | 54  |
| 3  | 2  | 2   | 4   | 7   | 4   | 9   | 3   | 3   | 2   |
| 85 | 74 | 76  | 95  | 91  | 112 | 89  | 71  | 100 | 52  |
| 19 | 18 | 26  | 24  | 30  | 15  | 28  | 17  | 26  | 16  |
| 18 | 26 | 21  | 41  | 58  | 42  | 22  | 22  | 25  | 24  |
| 29 | 29 | 41  | 33  | 44  | 33  | 29  | 34  | 34  | 28  |
| 31 | 19 | 24  | 24  | 22  | 24  | 27  | 19  | 22  | 17  |
| 26 | 27 | 37  | 31  | 42  | 35  | 47  | 41  | 47  | 34  |
| 44 | 51 | 43  | 72  | 112 | 78  | 91  | 84  | 96  | 52  |
| 25 | 15 | 23  | 18  | 23  | 19  | 17  | 23  | 18  | 22  |
| 28 | 26 | 34  | 35  | 35  | 43  | 41  | 31  | 35  | 24  |
| 41 | 38 | 44  | 59  | 80  | 65  | 51  | 71  | 47  | 40  |
| 13 | 11 | 18  | 22  | 37  | 32  | 26  | 20  | 16  | 19  |
| 20 | 10 | 24  | 14  | 17  | 19  | 18  | 20  | 18  | 23  |
| 25 | 48 | 30  | 65  | 61  | 53  | 63  | 61  | 54  | 51  |
| 11 | 19 | 14  | 11  | 10  | 6   | 4   | 10  | 11  | 11  |
| 46 | 58 | 61  | 97  | 151 | 98  | 121 | 118 | 136 | 64  |
| 81 | 89 | 107 | 176 | 272 | 212 | 294 | 260 | 276 | 126 |
| 44 | 50 | 51  | 61  | 102 | 73  | 103 | 108 | 108 | 66  |
| 64 | 50 | 65  | 138 | 198 | 175 | 273 | 230 | 238 | 116 |
| 77 | 74 | 90  | 139 | 167 | 140 | 204 | 200 | 210 | 98  |
| 33 | 45 | 40  | 33  | 67  | 70  | 74  | 70  | 80  | 47  |
| 53 | 77 | 67  | 88  | 127 | 106 | 159 | 130 | 169 | 99  |
| 50 | 42 | 53  | 73  | 74  | 80  | 103 | 105 | 133 | 75  |
| 61 | 49 | 48  | 83  | 106 | 87  | 87  | 89  | 99  | 55  |
| 52 | 40 | 54  | 80  | 108 | 77  | 149 | 168 | 181 | 90  |
| 85 | 67 | 72  | 45  | 61  | 43  | 85  | 86  | 103 | 80  |
| 83 | 80 | 88  | 108 | 115 | 113 | 173 | 156 | 177 | 93  |
| 65 | 66 | 64  | 265 | 352 | 300 | 372 | 323 | 355 | 160 |
| 43 | 46 | 53  | 146 | 156 | 117 | 197 | 169 | 189 | 94  |

|     |     |     |     |     |     |     |     |     |     |
|-----|-----|-----|-----|-----|-----|-----|-----|-----|-----|
| 38  | 43  | 31  | 47  | 53  | 53  | 74  | 60  | 71  | 40  |
| 34  | 43  | 34  | 65  | 79  | 78  | 53  | 78  | 50  | 37  |
| 30  | 48  | 42  | 67  | 92  | 73  | 88  | 79  | 86  | 56  |
| 59  | 61  | 67  | 79  | 94  | 87  | 83  | 56  | 85  | 81  |
| 36  | 41  | 45  | 40  | 67  | 57  | 84  | 59  | 58  | 37  |
| 38  | 46  | 53  | 43  | 60  | 42  | 59  | 53  | 58  | 47  |
| 38  | 47  | 61  | 55  | 50  | 43  | 52  | 41  | 40  | 42  |
| 21  | 31  | 23  | 51  | 72  | 65  | 48  | 33  | 56  | 29  |
| 42  | 48  | 54  | 66  | 96  | 77  | 120 | 98  | 89  | 62  |
| 31  | 29  | 32  | 18  | 34  | 22  | 39  | 28  | 32  | 20  |
| 22  | 15  | 25  | 27  | 26  | 28  | 25  | 19  | 22  | 22  |
| 59  | 52  | 53  | 61  | 73  | 65  | 56  | 60  | 66  | 49  |
| 33  | 39  | 34  | 33  | 39  | 26  | 52  | 64  | 58  | 30  |
| 35  | 53  | 67  | 99  | 124 | 111 | 142 | 142 | 169 | 58  |
| 39  | 39  | 59  | 43  | 53  | 54  | 44  | 37  | 51  | 37  |
| 35  | 54  | 51  | 49  | 49  | 42  | 61  | 63  | 64  | 32  |
| 69  | 55  | 63  | 90  | 82  | 87  | 68  | 68  | 93  | 52  |
| 111 | 100 | 114 | 101 | 119 | 122 | 150 | 138 | 147 | 80  |
| 39  | 31  | 23  | 45  | 44  | 47  | 36  | 41  | 47  | 39  |
| 97  | 119 | 117 | 109 | 153 | 108 | 139 | 144 | 129 | 83  |
| 25  | 37  | 31  | 44  | 68  | 55  | 62  | 73  | 71  | 43  |
| 13  | 11  | 17  | 14  | 6   | 10  | 5   | 9   | 9   | 20  |
| 39  | 31  | 54  | 140 | 189 | 121 | 153 | 123 | 140 | 57  |
| 11  | 15  | 16  | 39  | 48  | 37  | 45  | 30  | 28  | 15  |
| 23  | 9   | 15  | 61  | 80  | 56  | 61  | 57  | 62  | 27  |
| 22  | 10  | 19  | 87  | 118 | 72  | 49  | 30  | 47  | 20  |
| 22  | 27  | 28  | 105 | 124 | 78  | 80  | 59  | 71  | 34  |
| 49  | 53  | 46  | 109 | 119 | 96  | 96  | 76  | 87  | 54  |
| 53  | 46  | 55  | 67  | 79  | 75  | 76  | 77  | 106 | 38  |
| 58  | 59  | 64  | 300 | 356 | 319 | 236 | 224 | 239 | 94  |
| 35  | 30  | 30  | 55  | 64  | 57  | 52  | 30  | 40  | 39  |
| 99  | 97  | 87  | 196 | 266 | 223 | 311 | 302 | 371 | 158 |
| 44  | 43  | 38  | 141 | 209 | 154 | 307 | 268 | 309 | 155 |
| 36  | 42  | 39  | 104 | 116 | 99  | 86  | 66  | 66  | 51  |
| 33  | 26  | 37  | 75  | 114 | 95  | 135 | 107 | 137 | 58  |
| 47  | 42  | 51  | 86  | 101 | 86  | 93  | 81  | 108 | 55  |
| 84  | 66  | 95  | 67  | 93  | 70  | 69  | 78  | 77  | 65  |
| 44  | 46  | 52  | 78  | 142 | 123 | 84  | 88  | 83  | 39  |
| 58  | 57  | 55  | 65  | 88  | 68  | 51  | 42  | 47  | 42  |
| 30  | 19  | 28  | 58  | 55  | 51  | 59  | 44  | 53  | 36  |
| 19  | 22  | 20  | 30  | 37  | 43  | 27  | 15  | 14  | 19  |

|    |    |     |     |     |     |     |     |     |     |
|----|----|-----|-----|-----|-----|-----|-----|-----|-----|
| 44 | 60 | 56  | 144 | 183 | 156 | 198 | 161 | 192 | 82  |
| 9  | 8  | 10  | 9   | 15  | 13  | 9   | 6   | 10  | 1   |
| 27 | 21 | 25  | 98  | 112 | 67  | 70  | 60  | 83  | 25  |
| 27 | 26 | 21  | 44  | 52  | 25  | 26  | 33  | 31  | 18  |
| 9  | 7  | 12  | 39  | 54  | 32  | 16  | 22  | 21  | 8   |
| 13 | 7  | 13  | 24  | 42  | 19  | 22  | 9   | 27  | 14  |
| 16 | 22 | 23  | 40  | 68  | 49  | 40  | 25  | 33  | 27  |
| 18 | 26 | 39  | 36  | 73  | 70  | 42  | 27  | 43  | 29  |
| 61 | 73 | 73  | 149 | 163 | 163 | 198 | 146 | 188 | 108 |
| 71 | 75 | 75  | 135 | 173 | 126 | 167 | 143 | 177 | 74  |
| 23 | 35 | 29  | 52  | 75  | 65  | 64  | 49  | 64  | 40  |
| 39 | 36 | 36  | 35  | 38  | 39  | 66  | 46  | 68  | 40  |
| 21 | 12 | 10  | 17  | 17  | 19  | 35  | 28  | 29  | 20  |
| 54 | 40 | 53  | 130 | 125 | 110 | 111 | 86  | 115 | 56  |
| 79 | 86 | 76  | 131 | 156 | 135 | 157 | 111 | 138 | 89  |
| 33 | 47 | 52  | 65  | 107 | 69  | 102 | 79  | 95  | 54  |
| 49 | 58 | 69  | 82  | 131 | 117 | 203 | 154 | 163 | 79  |
| 11 | 24 | 23  | 29  | 38  | 24  | 21  | 21  | 20  | 19  |
| 23 | 42 | 47  | 61  | 77  | 67  | 83  | 59  | 76  | 38  |
| 42 | 51 | 45  | 36  | 41  | 47  | 32  | 44  | 30  | 44  |
| 38 | 29 | 41  | 91  | 112 | 91  | 77  | 73  | 87  | 37  |
| 35 | 45 | 41  | 112 | 148 | 113 | 85  | 79  | 90  | 45  |
| 20 | 8  | 17  | 82  | 100 | 90  | 83  | 51  | 55  | 31  |
| 55 | 67 | 76  | 237 | 367 | 278 | 244 | 212 | 216 | 122 |
| 28 | 27 | 26  | 69  | 91  | 91  | 69  | 62  | 55  | 34  |
| 14 | 12 | 9   | 56  | 66  | 87  | 41  | 42  | 61  | 31  |
| 93 | 65 | 80  | 29  | 43  | 28  | 51  | 42  | 55  | 60  |
| 35 | 32 | 25  | 25  | 28  | 28  | 11  | 16  | 12  | 23  |
| 95 | 91 | 95  | 94  | 98  | 83  | 103 | 91  | 101 | 108 |
| 90 | 81 | 87  | 69  | 75  | 68  | 77  | 62  | 77  | 64  |
| 72 | 66 | 100 | 109 | 177 | 166 | 124 | 90  | 117 | 79  |
| 33 | 38 | 42  | 85  | 120 | 97  | 80  | 66  | 69  | 34  |
| 75 | 50 | 71  | 120 | 168 | 147 | 140 | 127 | 129 | 74  |
| 22 | 23 | 29  | 23  | 37  | 23  | 35  | 22  | 27  | 13  |
| 36 | 41 | 46  | 144 | 142 | 129 | 111 | 92  | 105 | 46  |
| 61 | 50 | 55  | 114 | 109 | 112 | 94  | 82  | 90  | 55  |
| 25 | 25 | 26  | 65  | 61  | 46  | 41  | 49  | 73  | 21  |
| 56 | 53 | 68  | 114 | 111 | 95  | 91  | 78  | 86  | 62  |
| 52 | 53 | 59  | 75  | 125 | 101 | 124 | 119 | 128 | 68  |
| 33 | 38 | 50  | 107 | 139 | 100 | 80  | 83  | 92  | 57  |
| 34 | 26 | 39  | 52  | 59  | 35  | 51  | 54  | 40  | 27  |

|     |     |     |     |     |     |     |     |     |     |
|-----|-----|-----|-----|-----|-----|-----|-----|-----|-----|
| 21  | 17  | 18  | 99  | 104 | 83  | 60  | 48  | 70  | 28  |
| 22  | 21  | 21  | 33  | 39  | 24  | 28  | 36  | 28  | 27  |
| 34  | 40  | 39  | 52  | 59  | 60  | 31  | 34  | 31  | 33  |
| 23  | 27  | 27  | 34  | 37  | 34  | 42  | 44  | 36  | 33  |
| 44  | 26  | 55  | 121 | 135 | 120 | 253 | 217 | 216 | 107 |
| 37  | 39  | 38  | 20  | 35  | 31  | 33  | 28  | 23  | 38  |
| 30  | 39  | 51  | 38  | 38  | 42  | 33  | 37  | 30  | 40  |
| 36  | 27  | 40  | 118 | 179 | 122 | 103 | 76  | 100 | 53  |
| 73  | 71  | 88  | 126 | 197 | 138 | 133 | 126 | 160 | 64  |
| 64  | 73  | 57  | 67  | 102 | 78  | 106 | 109 | 95  | 64  |
| 29  | 32  | 31  | 23  | 34  | 28  | 37  | 29  | 41  | 18  |
| 46  | 47  | 47  | 40  | 53  | 32  | 34  | 18  | 37  | 33  |
| 48  | 46  | 45  | 39  | 57  | 48  | 33  | 31  | 39  | 36  |
| 50  | 54  | 59  | 63  | 84  | 85  | 87  | 60  | 79  | 44  |
| 78  | 82  | 81  | 112 | 136 | 130 | 116 | 67  | 88  | 73  |
| 36  | 39  | 36  | 54  | 90  | 64  | 48  | 35  | 56  | 28  |
| 56  | 45  | 47  | 68  | 93  | 96  | 55  | 53  | 66  | 40  |
| 27  | 46  | 38  | 90  | 102 | 95  | 92  | 80  | 78  | 42  |
| 77  | 89  | 101 | 79  | 115 | 102 | 154 | 162 | 156 | 101 |
| 80  | 87  | 83  | 155 | 180 | 162 | 175 | 166 | 176 | 97  |
| 42  | 37  | 21  | 75  | 86  | 74  | 48  | 35  | 49  | 31  |
| 71  | 60  | 58  | 46  | 49  | 46  | 76  | 72  | 63  | 60  |
| 102 | 102 | 117 | 120 | 136 | 136 | 175 | 162 | 217 | 109 |
| 30  | 38  | 31  | 58  | 87  | 68  | 49  | 41  | 39  | 28  |
| 0   | 4   | 3   | 7   | 8   | 4   | 7   | 4   | 1   | 1   |
| 48  | 34  | 51  | 81  | 116 | 100 | 95  | 92  | 118 | 49  |
| 30  | 31  | 25  | 65  | 61  | 71  | 46  | 39  | 46  | 21  |
| 43  | 52  | 59  | 110 | 140 | 115 | 112 | 97  | 103 | 58  |
| 21  | 18  | 20  | 132 | 140 | 117 | 168 | 141 | 145 | 62  |
| 52  | 40  | 42  | 55  | 79  | 70  | 75  | 58  | 76  | 43  |
| 18  | 15  | 17  | 24  | 34  | 22  | 26  | 26  | 26  | 11  |
| 19  | 20  | 16  | 26  | 33  | 41  | 24  | 27  | 24  | 21  |
| 70  | 50  | 44  | 115 | 129 | 122 | 122 | 105 | 109 | 63  |
| 50  | 54  | 64  | 63  | 81  | 88  | 53  | 65  | 44  | 43  |
| 84  | 75  | 95  | 123 | 174 | 133 | 167 | 153 | 163 | 103 |
| 9   | 16  | 18  | 40  | 45  | 32  | 28  | 25  | 24  | 19  |
| 39  | 44  | 39  | 57  | 60  | 46  | 43  | 51  | 54  | 30  |
| 41  | 41  | 33  | 73  | 117 | 93  | 67  | 85  | 65  | 34  |
| 38  | 39  | 46  | 97  | 100 | 89  | 98  | 89  | 91  | 49  |
| 41  | 36  | 40  | 70  | 108 | 77  | 74  | 44  | 59  | 26  |
| 24  | 46  | 33  | 53  | 50  | 50  | 44  | 23  | 48  | 32  |

|     |     |     |     |     |     |     |     |     |     |
|-----|-----|-----|-----|-----|-----|-----|-----|-----|-----|
| 18  | 21  | 19  | 30  | 31  | 27  | 35  | 27  | 36  | 10  |
| 39  | 40  | 42  | 49  | 58  | 57  | 60  | 72  | 63  | 38  |
| 52  | 39  | 40  | 60  | 62  | 55  | 51  | 48  | 57  | 38  |
| 43  | 41  | 50  | 56  | 91  | 51  | 58  | 47  | 59  | 40  |
| 21  | 20  | 18  | 36  | 49  | 38  | 53  | 40  | 46  | 19  |
| 26  | 36  | 28  | 38  | 55  | 48  | 41  | 46  | 39  | 35  |
| 78  | 81  | 77  | 54  | 74  | 81  | 95  | 88  | 76  | 44  |
| 84  | 76  | 75  | 83  | 96  | 78  | 82  | 71  | 103 | 50  |
| 119 | 120 | 104 | 91  | 117 | 110 | 121 | 114 | 111 | 56  |
| 83  | 105 | 102 | 116 | 134 | 126 | 113 | 99  | 121 | 73  |
| 51  | 55  | 50  | 69  | 82  | 82  | 94  | 66  | 62  | 46  |
| 71  | 59  | 79  | 67  | 62  | 73  | 69  | 53  | 82  | 50  |
| 68  | 65  | 68  | 73  | 99  | 83  | 80  | 74  | 78  | 46  |
| 36  | 50  | 49  | 153 | 192 | 161 | 145 | 153 | 134 | 56  |
| 50  | 60  | 71  | 197 | 233 | 182 | 270 | 275 | 280 | 131 |
| 35  | 42  | 45  | 120 | 187 | 169 | 166 | 174 | 183 | 77  |
| 53  | 60  | 76  | 131 | 143 | 160 | 130 | 137 | 130 | 94  |
| 74  | 63  | 82  | 94  | 112 | 103 | 140 | 128 | 144 | 84  |
| 37  | 43  | 37  | 49  | 68  | 42  | 45  | 34  | 34  | 43  |
| 55  | 60  | 56  | 61  | 50  | 48  | 55  | 58  | 87  | 51  |
| 90  | 67  | 78  | 95  | 122 | 101 | 117 | 102 | 115 | 71  |
| 49  | 74  | 64  | 86  | 119 | 109 | 129 | 136 | 134 | 91  |
| 53  | 79  | 55  | 179 | 238 | 227 | 331 | 317 | 317 | 148 |
| 46  | 64  | 59  | 67  | 78  | 56  | 74  | 82  | 58  | 55  |
| 70  | 57  | 39  | 212 | 263 | 239 | 364 | 321 | 347 | 160 |
| 21  | 27  | 37  | 28  | 27  | 38  | 26  | 20  | 39  | 19  |
| 64  | 51  | 61  | 94  | 120 | 99  | 164 | 134 | 168 | 93  |
| 77  | 81  | 81  | 74  | 109 | 85  | 97  | 80  | 107 | 53  |
| 81  | 58  | 85  | 50  | 63  | 65  | 86  | 77  | 100 | 51  |
| 43  | 63  | 62  | 88  | 97  | 68  | 119 | 96  | 103 | 51  |
| 50  | 47  | 53  | 91  | 110 | 83  | 113 | 126 | 112 | 83  |
| 54  | 39  | 50  | 75  | 102 | 101 | 134 | 115 | 129 | 65  |
| 56  | 73  | 77  | 178 | 192 | 215 | 312 | 288 | 334 | 176 |
| 77  | 79  | 83  | 71  | 84  | 71  | 78  | 70  | 90  | 65  |
| 64  | 69  | 64  | 142 | 176 | 166 | 93  | 79  | 99  | 49  |
| 30  | 26  | 19  | 33  | 55  | 26  | 30  | 24  | 21  | 13  |
| 14  | 12  | 14  | 64  | 93  | 62  | 73  | 73  | 78  | 21  |
| 99  | 94  | 95  | 101 | 126 | 108 | 106 | 106 | 102 | 84  |
| 52  | 45  | 47  | 45  | 47  | 35  | 26  | 19  | 25  | 31  |
| 39  | 49  | 50  | 50  | 66  | 69  | 39  | 46  | 48  | 34  |
| 46  | 49  | 48  | 75  | 57  | 52  | 51  | 58  | 53  | 52  |



|    |    |    |     |     |     |     |     |     |     |
|----|----|----|-----|-----|-----|-----|-----|-----|-----|
| 19 | 25 | 23 | 26  | 39  | 31  | 24  | 15  | 24  | 12  |
| 52 | 51 | 46 | 75  | 95  | 86  | 90  | 54  | 86  | 47  |
| 27 | 30 | 26 | 61  | 70  | 58  | 45  | 44  | 50  | 31  |
| 42 | 44 | 53 | 81  | 103 | 77  | 56  | 67  | 78  | 36  |
| 26 | 27 | 34 | 41  | 53  | 64  | 62  | 42  | 43  | 33  |
| 42 | 40 | 54 | 109 | 145 | 144 | 102 | 96  | 107 | 70  |
| 71 | 58 | 77 | 136 | 138 | 123 | 118 | 111 | 108 | 73  |
| 72 | 80 | 76 | 151 | 190 | 170 | 197 | 140 | 137 | 98  |
| 57 | 63 | 52 | 46  | 47  | 36  | 76  | 63  | 53  | 29  |
| 26 | 22 | 28 | 25  | 33  | 31  | 38  | 38  | 36  | 16  |
| 13 | 13 | 8  | 19  | 25  | 14  | 25  | 14  | 19  | 10  |
| 37 | 37 | 33 | 58  | 50  | 63  | 45  | 43  | 52  | 36  |
| 8  | 10 | 9  | 3   | 4   | 2   | 3   | 4   | 7   | 7   |
| 36 | 28 | 33 | 42  | 35  | 33  | 36  | 42  | 39  | 22  |
| 29 | 33 | 25 | 25  | 42  | 38  | 31  | 26  | 35  | 26  |
| 24 | 19 | 34 | 34  | 56  | 37  | 42  | 43  | 37  | 29  |
| 27 | 27 | 38 | 60  | 84  | 64  | 69  | 79  | 74  | 42  |
| 6  | 12 | 9  | 2   | 9   | 1   | 8   | 5   | 11  | 4   |
| 14 | 12 | 14 | 13  | 14  | 11  | 12  | 11  | 19  | 19  |
| 15 | 15 | 19 | 12  | 10  | 11  | 14  | 7   | 11  | 11  |
| 22 | 24 | 15 | 17  | 19  | 18  | 23  | 15  | 10  | 18  |
| 43 | 47 | 57 | 47  | 57  | 55  | 53  | 50  | 43  | 39  |
| 36 | 58 | 42 | 96  | 136 | 114 | 99  | 62  | 90  | 52  |
| 16 | 11 | 14 | 11  | 9   | 10  | 9   | 4   | 4   | 6   |
| 46 | 34 | 33 | 39  | 47  | 45  | 28  | 30  | 35  | 36  |
| 31 | 39 | 35 | 28  | 44  | 28  | 46  | 39  | 41  | 34  |
| 31 | 35 | 47 | 66  | 89  | 60  | 51  | 57  | 59  | 37  |
| 45 | 51 | 44 | 79  | 94  | 92  | 58  | 84  | 83  | 47  |
| 14 | 13 | 14 | 21  | 31  | 29  | 30  | 24  | 21  | 16  |
| 18 | 20 | 20 | 48  | 70  | 64  | 58  | 53  | 57  | 17  |
| 68 | 74 | 80 | 324 | 388 | 363 | 342 | 294 | 310 | 142 |
| 56 | 57 | 47 | 227 | 340 | 305 | 179 | 208 | 230 | 86  |
| 69 | 61 | 72 | 77  | 92  | 100 | 74  | 80  | 80  | 60  |
| 67 | 67 | 93 | 71  | 96  | 97  | 99  | 82  | 86  | 67  |
| 50 | 67 | 56 | 52  | 60  | 73  | 82  | 69  | 63  | 49  |
| 57 | 54 | 67 | 97  | 130 | 100 | 105 | 75  | 96  | 60  |
| 43 | 39 | 40 | 36  | 61  | 41  | 96  | 76  | 78  | 37  |
| 42 | 46 | 59 | 73  | 97  | 70  | 118 | 140 | 138 | 61  |
| 19 | 19 | 27 | 48  | 65  | 53  | 87  | 83  | 69  | 37  |
| 73 | 66 | 77 | 162 | 188 | 189 | 229 | 187 | 204 | 111 |
| 53 | 51 | 38 | 43  | 55  | 52  | 55  | 26  | 50  | 30  |

|    |    |    |     |     |     |     |     |     |    |
|----|----|----|-----|-----|-----|-----|-----|-----|----|
| 5  | 7  | 10 | 3   | 4   | 7   | 10  | 7   | 3   | 8  |
| 41 | 47 | 55 | 48  | 48  | 61  | 44  | 39  | 56  | 31 |
| 34 | 34 | 46 | 57  | 91  | 69  | 75  | 48  | 56  | 41 |
| 41 | 36 | 44 | 38  | 49  | 38  | 67  | 63  | 56  | 30 |
| 9  | 16 | 14 | 33  | 35  | 29  | 17  | 15  | 10  | 5  |
| 47 | 39 | 51 | 50  | 65  | 39  | 44  | 41  | 47  | 40 |
| 60 | 55 | 53 | 80  | 88  | 93  | 86  | 56  | 73  | 58 |
| 37 | 37 | 33 | 43  | 79  | 58  | 48  | 40  | 53  | 31 |
| 12 | 10 | 9  | 10  | 11  | 8   | 12  | 8   | 10  | 9  |
| 36 | 24 | 37 | 26  | 38  | 24  | 48  | 35  | 28  | 24 |
| 29 | 43 | 44 | 56  | 59  | 53  | 34  | 24  | 31  | 44 |
| 68 | 74 | 71 | 53  | 63  | 61  | 50  | 57  | 57  | 64 |
| 26 | 25 | 32 | 22  | 19  | 22  | 13  | 10  | 4   | 22 |
| 61 | 52 | 46 | 51  | 57  | 58  | 54  | 48  | 54  | 44 |
| 38 | 39 | 47 | 53  | 48  | 45  | 40  | 45  | 47  | 26 |
| 63 | 49 | 56 | 45  | 81  | 63  | 73  | 59  | 54  | 40 |
| 58 | 37 | 49 | 74  | 73  | 73  | 81  | 80  | 83  | 51 |
| 73 | 65 | 58 | 79  | 118 | 88  | 151 | 112 | 107 | 67 |
| 61 | 61 | 58 | 66  | 85  | 55  | 82  | 72  | 91  | 44 |
| 30 | 33 | 41 | 30  | 27  | 25  | 24  | 22  | 31  | 24 |
| 46 | 49 | 51 | 34  | 43  | 32  | 51  | 40  | 40  | 30 |
| 33 | 56 | 40 | 46  | 81  | 53  | 78  | 67  | 69  | 50 |
| 39 | 33 | 34 | 53  | 76  | 65  | 66  | 67  | 52  | 28 |
| 63 | 65 | 83 | 51  | 68  | 58  | 47  | 40  | 61  | 57 |
| 6  | 14 | 17 | 8   | 24  | 14  | 8   | 7   | 20  | 14 |
| 49 | 30 | 45 | 43  | 57  | 54  | 48  | 51  | 47  | 43 |
| 75 | 67 | 55 | 72  | 80  | 87  | 76  | 90  | 79  | 67 |
| 10 | 12 | 21 | 15  | 17  | 15  | 18  | 12  | 10  | 15 |
| 13 | 12 | 10 | 13  | 10  | 11  | 15  | 18  | 10  | 9  |
| 30 | 28 | 23 | 20  | 22  | 32  | 26  | 23  | 27  | 25 |
| 30 | 47 | 37 | 32  | 49  | 45  | 36  | 29  | 38  | 38 |
| 34 | 47 | 52 | 29  | 36  | 34  | 27  | 32  | 38  | 35 |
| 60 | 41 | 62 | 65  | 66  | 59  | 79  | 76  | 99  | 46 |
| 10 | 9  | 18 | 5   | 9   | 8   | 6   | 8   | 11  | 11 |
| 55 | 57 | 66 | 125 | 176 | 134 | 124 | 116 | 134 | 95 |
| 67 | 70 | 62 | 47  | 57  | 50  | 73  | 67  | 74  | 58 |
| 54 | 35 | 48 | 66  | 76  | 52  | 54  | 45  | 55  | 57 |
| 49 | 58 | 59 | 46  | 74  | 62  | 78  | 61  | 68  | 66 |
| 5  | 14 | 14 | 3   | 6   | 4   | 3   | 2   | 3   | 9  |
| 43 | 31 | 43 | 49  | 58  | 58  | 51  | 40  | 36  | 34 |
| 51 | 44 | 55 | 38  | 61  | 58  | 67  | 53  | 66  | 50 |

|    |    |    |     |     |     |     |     |     |     |
|----|----|----|-----|-----|-----|-----|-----|-----|-----|
| 20 | 44 | 39 | 72  | 85  | 86  | 58  | 46  | 51  | 42  |
| 27 | 42 | 28 | 44  | 44  | 34  | 45  | 45  | 33  | 33  |
| 22 | 21 | 17 | 20  | 25  | 19  | 19  | 26  | 24  | 18  |
| 62 | 50 | 55 | 117 | 160 | 158 | 104 | 103 | 116 | 60  |
| 59 | 56 | 76 | 72  | 106 | 82  | 92  | 88  | 102 | 64  |
| 47 | 46 | 39 | 170 | 214 | 182 | 187 | 146 | 181 | 87  |
| 52 | 41 | 44 | 45  | 64  | 53  | 50  | 65  | 49  | 38  |
| 31 | 25 | 25 | 24  | 24  | 17  | 17  | 20  | 15  | 21  |
| 35 | 40 | 34 | 37  | 40  | 25  | 31  | 43  | 30  | 31  |
| 26 | 29 | 34 | 27  | 22  | 27  | 44  | 32  | 35  | 28  |
| 19 | 16 | 19 | 15  | 32  | 19  | 28  | 21  | 18  | 23  |
| 25 | 23 | 26 | 19  | 35  | 20  | 26  | 12  | 22  | 28  |
| 44 | 39 | 46 | 98  | 114 | 79  | 85  | 97  | 99  | 56  |
| 23 | 12 | 23 | 24  | 53  | 45  | 34  | 25  | 32  | 22  |
| 29 | 34 | 35 | 28  | 42  | 36  | 36  | 43  | 41  | 32  |
| 13 | 16 | 26 | 15  | 23  | 26  | 22  | 30  | 19  | 24  |
| 29 | 36 | 35 | 34  | 50  | 43  | 48  | 41  | 31  | 28  |
| 34 | 30 | 26 | 47  | 66  | 60  | 29  | 34  | 42  | 24  |
| 48 | 36 | 40 | 141 | 167 | 130 | 125 | 151 | 125 | 61  |
| 35 | 35 | 48 | 55  | 61  | 61  | 58  | 50  | 52  | 43  |
| 48 | 36 | 71 | 63  | 94  | 58  | 59  | 67  | 72  | 54  |
| 50 | 48 | 67 | 63  | 82  | 59  | 64  | 67  | 76  | 79  |
| 32 | 42 | 62 | 56  | 64  | 67  | 59  | 79  | 78  | 57  |
| 26 | 33 | 33 | 59  | 55  | 66  | 95  | 96  | 104 | 48  |
| 68 | 55 | 51 | 69  | 121 | 91  | 92  | 84  | 84  | 68  |
| 26 | 24 | 24 | 34  | 42  | 38  | 44  | 52  | 45  | 38  |
| 19 | 11 | 15 | 8   | 18  | 17  | 19  | 21  | 27  | 23  |
| 30 | 36 | 36 | 40  | 40  | 30  | 37  | 33  | 39  | 46  |
| 19 | 30 | 26 | 24  | 30  | 32  | 52  | 48  | 36  | 32  |
| 26 | 31 | 28 | 20  | 24  | 26  | 34  | 30  | 42  | 28  |
| 65 | 56 | 65 | 79  | 77  | 87  | 94  | 102 | 84  | 61  |
| 58 | 66 | 50 | 160 | 181 | 162 | 232 | 246 | 229 | 113 |
| 55 | 52 | 62 | 86  | 82  | 69  | 101 | 97  | 96  | 74  |
| 48 | 45 | 62 | 81  | 120 | 121 | 98  | 92  | 82  | 52  |
| 74 | 54 | 80 | 116 | 146 | 139 | 129 | 113 | 132 | 61  |
| 65 | 56 | 58 | 149 | 192 | 140 | 143 | 136 | 166 | 91  |
| 51 | 35 | 60 | 44  | 81  | 70  | 59  | 56  | 55  | 25  |
| 63 | 66 | 75 | 144 | 212 | 154 | 154 | 123 | 142 | 64  |
| 18 | 17 | 31 | 28  | 40  | 32  | 28  | 20  | 19  | 14  |
| 17 | 40 | 22 | 70  | 64  | 49  | 68  | 43  | 53  | 25  |
| 25 | 21 | 38 | 73  | 109 | 79  | 56  | 38  | 35  | 20  |

|     |     |     |     |     |     |     |     |     |     |
|-----|-----|-----|-----|-----|-----|-----|-----|-----|-----|
| 16  | 13  | 13  | 57  | 50  | 43  | 42  | 42  | 34  | 17  |
| 1   | 1   | 6   | 9   | 9   | 4   | 8   | 4   | 10  | 8   |
| 28  | 35  | 27  | 109 | 145 | 94  | 127 | 95  | 114 | 57  |
| 13  | 21  | 27  | 17  | 15  | 16  | 25  | 17  | 22  | 22  |
| 8   | 8   | 9   | 6   | 4   | 13  | 5   | 3   | 6   | 4   |
| 121 | 113 | 145 | 120 | 148 | 130 | 200 | 192 | 212 | 139 |
| 49  | 34  | 39  | 28  | 35  | 37  | 39  | 22  | 31  | 42  |
| 38  | 36  | 44  | 31  | 41  | 30  | 36  | 20  | 21  | 29  |
| 61  | 46  | 60  | 78  | 81  | 76  | 59  | 62  | 65  | 71  |
| 44  | 42  | 40  | 32  | 35  | 24  | 34  | 25  | 33  | 40  |
| 97  | 86  | 103 | 61  | 62  | 53  | 99  | 60  | 68  | 71  |
| 82  | 74  | 95  | 64  | 89  | 80  | 79  | 85  | 77  | 71  |
| 38  | 43  | 44  | 68  | 101 | 80  | 93  | 71  | 87  | 49  |
| 48  | 44  | 54  | 105 | 108 | 84  | 77  | 63  | 76  | 56  |
| 39  | 44  | 48  | 74  | 82  | 86  | 85  | 67  | 96  | 49  |
| 52  | 65  | 74  | 63  | 82  | 76  | 82  | 99  | 99  | 59  |
| 56  | 72  | 64  | 153 | 157 | 143 | 122 | 97  | 128 | 75  |
| 36  | 45  | 40  | 80  | 93  | 82  | 104 | 92  | 96  | 56  |
| 23  | 26  | 24  | 60  | 68  | 65  | 43  | 43  | 39  | 37  |
| 36  | 29  | 40  | 76  | 107 | 73  | 59  | 59  | 74  | 37  |
| 40  | 61  | 46  | 62  | 82  | 63  | 74  | 48  | 63  | 39  |
| 60  | 47  | 47  | 100 | 182 | 140 | 163 | 124 | 128 | 76  |
| 21  | 13  | 34  | 137 | 165 | 121 | 75  | 65  | 63  | 52  |
| 37  | 46  | 51  | 56  | 91  | 64  | 70  | 83  | 68  | 48  |
| 59  | 52  | 74  | 89  | 113 | 118 | 104 | 105 | 122 | 71  |
| 43  | 37  | 45  | 61  | 90  | 81  | 89  | 62  | 88  | 54  |
| 31  | 44  | 36  | 44  | 45  | 41  | 33  | 53  | 51  | 32  |
| 55  | 62  | 47  | 52  | 60  | 71  | 64  | 77  | 65  | 43  |
| 82  | 58  | 71  | 62  | 62  | 33  | 40  | 37  | 54  | 36  |
| 62  | 69  | 62  | 57  | 68  | 77  | 73  | 72  | 62  | 62  |
| 41  | 31  | 31  | 29  | 46  | 34  | 43  | 34  | 28  | 28  |
| 55  | 61  | 60  | 36  | 62  | 49  | 48  | 43  | 43  | 29  |
| 49  | 71  | 54  | 57  | 62  | 59  | 69  | 47  | 67  | 36  |
| 47  | 45  | 54  | 32  | 33  | 53  | 48  | 32  | 44  | 33  |
| 50  | 47  | 60  | 29  | 33  | 44  | 57  | 34  | 59  | 31  |
| 65  | 76  | 60  | 48  | 80  | 53  | 52  | 58  | 63  | 40  |
| 32  | 27  | 25  | 21  | 20  | 34  | 24  | 22  | 30  | 14  |
| 27  | 32  | 31  | 54  | 75  | 80  | 48  | 56  | 59  | 30  |
| 20  | 30  | 32  | 105 | 144 | 131 | 82  | 56  | 77  | 34  |
| 40  | 53  | 38  | 99  | 116 | 95  | 91  | 94  | 87  | 54  |
| 15  | 14  | 11  | 30  | 58  | 38  | 39  | 28  | 35  | 13  |

|     |     |     |     |     |     |     |     |     |     |
|-----|-----|-----|-----|-----|-----|-----|-----|-----|-----|
| 23  | 22  | 18  | 24  | 18  | 24  | 23  | 12  | 17  | 21  |
| 38  | 58  | 29  | 57  | 57  | 61  | 50  | 37  | 34  | 29  |
| 39  | 59  | 54  | 75  | 95  | 94  | 107 | 95  | 105 | 69  |
| 62  | 58  | 62  | 91  | 121 | 93  | 70  | 75  | 77  | 56  |
| 10  | 13  | 25  | 24  | 33  | 33  | 48  | 34  | 43  | 24  |
| 54  | 60  | 82  | 113 | 130 | 98  | 108 | 93  | 107 | 71  |
| 27  | 25  | 30  | 46  | 46  | 55  | 61  | 60  | 64  | 34  |
| 48  | 64  | 80  | 74  | 96  | 99  | 81  | 69  | 74  | 61  |
| 42  | 40  | 33  | 35  | 35  | 31  | 41  | 40  | 48  | 30  |
| 43  | 53  | 54  | 60  | 75  | 76  | 74  | 70  | 77  | 65  |
| 55  | 51  | 57  | 50  | 75  | 55  | 61  | 58  | 71  | 60  |
| 26  | 25  | 47  | 44  | 63  | 35  | 44  | 36  | 46  | 21  |
| 50  | 64  | 54  | 103 | 145 | 122 | 85  | 62  | 77  | 46  |
| 121 | 111 | 138 | 155 | 189 | 203 | 156 | 135 | 136 | 90  |
| 216 | 209 | 218 | 230 | 303 | 260 | 329 | 321 | 330 | 225 |
| 63  | 72  | 62  | 177 | 203 | 161 | 198 | 181 | 167 | 105 |
| 32  | 46  | 36  | 41  | 49  | 29  | 33  | 33  | 32  | 22  |
| 79  | 75  | 70  | 143 | 190 | 158 | 207 | 180 | 165 | 96  |
| 71  | 59  | 68  | 243 | 287 | 283 | 259 | 180 | 245 | 124 |
| 74  | 84  | 78  | 80  | 107 | 101 | 110 | 95  | 86  | 77  |
| 104 | 134 | 109 | 150 | 187 | 180 | 196 | 182 | 218 | 133 |
| 71  | 65  | 70  | 80  | 85  | 66  | 79  | 58  | 89  | 56  |
| 25  | 19  | 21  | 29  | 32  | 41  | 23  | 20  | 19  | 23  |
| 34  | 34  | 43  | 59  | 60  | 54  | 61  | 63  | 79  | 36  |
| 45  | 45  | 58  | 97  | 116 | 129 | 78  | 95  | 84  | 61  |
| 48  | 49  | 39  | 61  | 57  | 65  | 45  | 46  | 46  | 47  |
| 66  | 68  | 89  | 58  | 67  | 67  | 93  | 122 | 97  | 70  |
| 38  | 40  | 53  | 106 | 158 | 147 | 93  | 117 | 123 | 64  |
| 56  | 58  | 78  | 64  | 83  | 76  | 88  | 65  | 89  | 65  |
| 56  | 62  | 71  | 81  | 116 | 72  | 81  | 71  | 80  | 66  |
| 67  | 47  | 53  | 113 | 113 | 90  | 88  | 72  | 108 | 55  |
| 68  | 73  | 66  | 124 | 152 | 138 | 145 | 111 | 132 | 74  |
| 30  | 30  | 54  | 71  | 104 | 69  | 66  | 61  | 73  | 60  |
| 4   | 2   | 5   | 11  | 15  | 15  | 16  | 7   | 12  | 5   |
| 60  | 48  | 64  | 60  | 88  | 70  | 83  | 49  | 71  | 52  |
| 172 | 182 | 174 | 86  | 109 | 93  | 78  | 87  | 81  | 67  |
| 60  | 50  | 54  | 71  | 93  | 61  | 73  | 48  | 75  | 49  |
| 52  | 50  | 44  | 47  | 45  | 40  | 53  | 32  | 41  | 34  |
| 40  | 41  | 40  | 55  | 60  | 69  | 53  | 42  | 39  | 33  |
| 42  | 43  | 47  | 25  | 39  | 36  | 39  | 29  | 38  | 35  |
| 54  | 80  | 53  | 194 | 231 | 228 | 244 | 210 | 233 | 87  |

|     |     |     |     |     |     |     |     |     |     |
|-----|-----|-----|-----|-----|-----|-----|-----|-----|-----|
| 37  | 20  | 25  | 100 | 162 | 120 | 69  | 57  | 87  | 42  |
| 61  | 44  | 58  | 105 | 117 | 89  | 142 | 123 | 155 | 68  |
| 71  | 74  | 89  | 184 | 274 | 247 | 378 | 335 | 346 | 177 |
| 55  | 61  | 66  | 140 | 137 | 179 | 173 | 167 | 150 | 97  |
| 62  | 52  | 59  | 166 | 217 | 215 | 157 | 157 | 163 | 74  |
| 43  | 47  | 36  | 123 | 184 | 146 | 137 | 152 | 146 | 86  |
| 65  | 73  | 81  | 233 | 326 | 275 | 259 | 207 | 222 | 134 |
| 66  | 70  | 73  | 181 | 238 | 226 | 236 | 215 | 209 | 100 |
| 53  | 45  | 58  | 140 | 172 | 170 | 153 | 142 | 168 | 104 |
| 57  | 58  | 55  | 250 | 347 | 299 | 334 | 285 | 338 | 203 |
| 31  | 32  | 42  | 72  | 98  | 79  | 69  | 62  | 64  | 45  |
| 64  | 59  | 49  | 78  | 84  | 74  | 64  | 52  | 58  | 62  |
| 13  | 17  | 11  | 63  | 66  | 46  | 52  | 19  | 44  | 20  |
| 10  | 15  | 11  | 30  | 34  | 33  | 16  | 19  | 22  | 12  |
| 38  | 26  | 45  | 84  | 119 | 109 | 74  | 74  | 80  | 28  |
| 52  | 55  | 64  | 93  | 105 | 95  | 65  | 55  | 63  | 50  |
| 153 | 160 | 189 | 311 | 372 | 299 | 384 | 287 | 378 | 201 |
| 97  | 113 | 131 | 148 | 165 | 176 | 283 | 257 | 306 | 167 |
| 83  | 77  | 97  | 87  | 112 | 88  | 87  | 97  | 78  | 62  |
| 83  | 88  | 101 | 176 | 192 | 135 | 259 | 254 | 284 | 107 |
| 99  | 100 | 95  | 114 | 160 | 137 | 167 | 145 | 164 | 77  |
| 108 | 116 | 115 | 102 | 152 | 138 | 137 | 138 | 144 | 93  |
| 58  | 50  | 58  | 82  | 112 | 83  | 127 | 128 | 135 | 87  |
| 57  | 89  | 69  | 108 | 121 | 97  | 100 | 73  | 118 | 90  |
| 116 | 135 | 143 | 185 | 206 | 188 | 227 | 225 | 215 | 151 |
| 112 | 123 | 122 | 172 | 210 | 162 | 332 | 264 | 279 | 166 |
| 89  | 88  | 85  | 116 | 132 | 119 | 201 | 179 | 187 | 116 |
| 35  | 41  | 39  | 48  | 58  | 45  | 37  | 32  | 34  | 43  |
| 33  | 48  | 43  | 86  | 89  | 95  | 105 | 92  | 82  | 47  |
| 13  | 16  | 26  | 11  | 16  | 14  | 17  | 18  | 14  | 8   |
| 19  | 17  | 38  | 24  | 31  | 17  | 38  | 35  | 23  | 16  |
| 51  | 44  | 44  | 55  | 87  | 58  | 82  | 51  | 58  | 31  |
| 24  | 37  | 33  | 27  | 47  | 39  | 36  | 27  | 27  | 27  |
| 25  | 21  | 20  | 28  | 38  | 36  | 26  | 46  | 40  | 31  |
| 28  | 20  | 28  | 36  | 42  | 31  | 50  | 61  | 55  | 34  |
| 62  | 72  | 69  | 67  | 99  | 63  | 89  | 68  | 70  | 50  |
| 47  | 46  | 57  | 79  | 111 | 84  | 88  | 81  | 90  | 63  |
| 54  | 46  | 51  | 113 | 171 | 126 | 111 | 99  | 102 | 80  |
| 40  | 47  | 39  | 95  | 112 | 101 | 100 | 107 | 102 | 58  |
| 25  | 33  | 16  | 50  | 82  | 65  | 49  | 51  | 52  | 28  |
| 22  | 23  | 18  | 19  | 34  | 30  | 40  | 38  | 44  | 21  |

|     |    |    |     |     |     |     |     |     |    |
|-----|----|----|-----|-----|-----|-----|-----|-----|----|
| 16  | 16 | 16 | 39  | 60  | 48  | 41  | 39  | 41  | 18 |
| 40  | 43 | 65 | 53  | 75  | 58  | 84  | 75  | 80  | 58 |
| 23  | 32 | 24 | 37  | 43  | 52  | 59  | 45  | 57  | 24 |
| 7   | 10 | 13 | 19  | 32  | 23  | 22  | 24  | 24  | 16 |
| 3   | 5  | 5  | 6   | 7   | 9   | 8   | 10  | 16  | 6  |
| 78  | 64 | 76 | 66  | 77  | 77  | 117 | 91  | 119 | 64 |
| 34  | 24 | 34 | 40  | 52  | 47  | 71  | 60  | 76  | 34 |
| 52  | 44 | 45 | 44  | 60  | 47  | 42  | 35  | 57  | 54 |
| 25  | 33 | 30 | 24  | 42  | 26  | 29  | 41  | 21  | 32 |
| 85  | 54 | 72 | 72  | 74  | 59  | 84  | 69  | 69  | 68 |
| 66  | 47 | 64 | 66  | 72  | 49  | 86  | 77  | 63  | 67 |
| 32  | 31 | 37 | 20  | 27  | 23  | 28  | 23  | 35  | 21 |
| 17  | 27 | 26 | 38  | 43  | 30  | 38  | 36  | 36  | 21 |
| 50  | 44 | 42 | 46  | 63  | 54  | 61  | 58  | 40  | 41 |
| 37  | 36 | 31 | 54  | 56  | 57  | 65  | 54  | 49  | 56 |
| 66  | 74 | 65 | 114 | 147 | 110 | 93  | 72  | 89  | 75 |
| 64  | 58 | 63 | 198 | 249 | 209 | 181 | 195 | 168 | 97 |
| 49  | 39 | 46 | 121 | 144 | 131 | 138 | 120 | 137 | 62 |
| 54  | 52 | 77 | 150 | 195 | 166 | 121 | 117 | 139 | 81 |
| 20  | 34 | 40 | 64  | 75  | 84  | 116 | 96  | 108 | 60 |
| 32  | 25 | 30 | 30  | 56  | 40  | 50  | 41  | 54  | 36 |
| 38  | 37 | 32 | 52  | 62  | 56  | 42  | 52  | 52  | 40 |
| 54  | 67 | 65 | 81  | 123 | 109 | 68  | 67  | 93  | 50 |
| 49  | 33 | 35 | 65  | 77  | 86  | 82  | 78  | 70  | 49 |
| 45  | 29 | 49 | 106 | 132 | 147 | 76  | 77  | 100 | 66 |
| 39  | 31 | 29 | 45  | 52  | 50  | 45  | 42  | 40  | 32 |
| 59  | 61 | 76 | 101 | 137 | 158 | 133 | 112 | 173 | 80 |
| 42  | 32 | 39 | 77  | 87  | 77  | 65  | 66  | 66  | 40 |
| 34  | 34 | 36 | 48  | 65  | 58  | 74  | 56  | 60  | 34 |
| 34  | 50 | 43 | 128 | 158 | 142 | 121 | 76  | 107 | 68 |
| 33  | 32 | 37 | 39  | 68  | 44  | 44  | 31  | 41  | 33 |
| 70  | 67 | 89 | 68  | 76  | 60  | 69  | 83  | 60  | 76 |
| 66  | 66 | 57 | 73  | 81  | 67  | 85  | 66  | 61  | 53 |
| 95  | 99 | 93 | 93  | 131 | 93  | 119 | 96  | 120 | 95 |
| 59  | 77 | 67 | 98  | 110 | 101 | 92  | 76  | 99  | 75 |
| 60  | 53 | 63 | 73  | 78  | 70  | 62  | 56  | 81  | 41 |
| 101 | 75 | 82 | 82  | 125 | 123 | 136 | 122 | 163 | 90 |
| 48  | 48 | 56 | 52  | 54  | 47  | 66  | 53  | 61  | 41 |
| 57  | 72 | 71 | 82  | 105 | 94  | 93  | 94  | 114 | 67 |
| 64  | 66 | 84 | 73  | 69  | 75  | 68  | 56  | 65  | 60 |
| 37  | 68 | 43 | 64  | 77  | 60  | 47  | 46  | 50  | 34 |

|     |     |     |     |     |     |     |     |     |     |
|-----|-----|-----|-----|-----|-----|-----|-----|-----|-----|
| 68  | 71  | 69  | 56  | 61  | 55  | 102 | 93  | 84  | 62  |
| 51  | 44  | 45  | 121 | 142 | 126 | 100 | 117 | 115 | 54  |
| 60  | 38  | 55  | 102 | 152 | 131 | 129 | 127 | 131 | 66  |
| 86  | 78  | 71  | 99  | 114 | 83  | 100 | 84  | 81  | 52  |
| 34  | 32  | 41  | 53  | 48  | 44  | 43  | 27  | 31  | 35  |
| 61  | 58  | 67  | 136 | 190 | 146 | 72  | 69  | 50  | 47  |
| 74  | 73  | 76  | 56  | 64  | 67  | 70  | 56  | 68  | 47  |
| 46  | 25  | 28  | 48  | 58  | 58  | 46  | 36  | 54  | 41  |
| 43  | 60  | 57  | 74  | 92  | 88  | 97  | 81  | 104 | 52  |
| 55  | 55  | 57  | 71  | 93  | 81  | 65  | 60  | 60  | 37  |
| 62  | 59  | 57  | 132 | 175 | 129 | 137 | 140 | 143 | 69  |
| 47  | 53  | 51  | 74  | 107 | 71  | 74  | 84  | 89  | 52  |
| 60  | 64  | 64  | 64  | 57  | 56  | 38  | 46  | 51  | 51  |
| 82  | 86  | 97  | 102 | 127 | 126 | 139 | 156 | 148 | 106 |
| 45  | 68  | 43  | 47  | 56  | 58  | 85  | 71  | 66  | 46  |
| 71  | 58  | 74  | 122 | 141 | 129 | 117 | 79  | 103 | 74  |
| 75  | 64  | 56  | 90  | 122 | 94  | 95  | 100 | 85  | 81  |
| 52  | 48  | 44  | 68  | 80  | 62  | 43  | 39  | 39  | 45  |
| 66  | 53  | 55  | 89  | 103 | 81  | 136 | 119 | 141 | 65  |
| 37  | 28  | 39  | 51  | 86  | 69  | 71  | 65  | 69  | 36  |
| 59  | 59  | 46  | 61  | 103 | 95  | 124 | 102 | 107 | 50  |
| 63  | 65  | 72  | 106 | 128 | 131 | 169 | 158 | 170 | 63  |
| 44  | 47  | 53  | 56  | 80  | 62  | 78  | 87  | 72  | 54  |
| 32  | 34  | 48  | 29  | 33  | 31  | 30  | 37  | 29  | 31  |
| 12  | 6   | 13  | 28  | 34  | 23  | 13  | 12  | 14  | 20  |
| 34  | 37  | 43  | 90  | 93  | 98  | 128 | 109 | 114 | 62  |
| 44  | 33  | 29  | 64  | 88  | 86  | 77  | 90  | 104 | 61  |
| 15  | 14  | 13  | 26  | 19  | 23  | 23  | 17  | 18  | 22  |
| 41  | 37  | 31  | 43  | 62  | 65  | 75  | 60  | 76  | 29  |
| 44  | 51  | 39  | 48  | 50  | 44  | 46  | 37  | 51  | 50  |
| 10  | 22  | 19  | 25  | 32  | 16  | 27  | 22  | 29  | 27  |
| 28  | 49  | 44  | 51  | 48  | 54  | 67  | 62  | 72  | 37  |
| 20  | 30  | 26  | 42  | 48  | 54  | 45  | 47  | 52  | 25  |
| 24  | 49  | 30  | 27  | 32  | 53  | 32  | 51  | 42  | 29  |
| 46  | 48  | 55  | 22  | 23  | 35  | 35  | 25  | 39  | 28  |
| 59  | 42  | 49  | 92  | 114 | 99  | 74  | 79  | 105 | 68  |
| 40  | 40  | 44  | 27  | 25  | 23  | 28  | 10  | 31  | 37  |
| 38  | 54  | 65  | 21  | 42  | 31  | 50  | 21  | 41  | 39  |
| 125 | 101 | 105 | 119 | 161 | 143 | 168 | 152 | 174 | 100 |
| 90  | 85  | 105 | 72  | 106 | 66  | 84  | 87  | 84  | 83  |
| 101 | 75  | 106 | 125 | 130 | 116 | 121 | 109 | 106 | 84  |



|    |     |     |     |     |     |     |     |     |     |
|----|-----|-----|-----|-----|-----|-----|-----|-----|-----|
| 63 | 56  | 78  | 60  | 73  | 79  | 66  | 63  | 58  | 81  |
| 64 | 52  | 52  | 79  | 123 | 101 | 112 | 104 | 108 | 62  |
| 80 | 84  | 99  | 91  | 132 | 104 | 132 | 102 | 133 | 56  |
| 32 | 45  | 38  | 196 | 211 | 205 | 303 | 274 | 286 | 133 |
| 42 | 29  | 43  | 178 | 192 | 151 | 217 | 159 | 193 | 87  |
| 56 | 39  | 41  | 100 | 117 | 105 | 152 | 114 | 144 | 68  |
| 18 | 19  | 18  | 30  | 23  | 29  | 30  | 37  | 23  | 23  |
| 46 | 44  | 51  | 47  | 65  | 65  | 56  | 47  | 53  | 43  |
| 75 | 65  | 83  | 37  | 36  | 32  | 44  | 51  | 55  | 52  |
| 64 | 56  | 54  | 38  | 57  | 49  | 68  | 53  | 64  | 45  |
| 2  | 0   | 1   | 3   | 1   | 2   | 3   | 1   | 3   | 4   |
| 96 | 105 | 127 | 120 | 117 | 120 | 185 | 194 | 206 | 120 |
| 82 | 103 | 90  | 69  | 93  | 79  | 122 | 87  | 82  | 87  |
| 18 | 15  | 13  | 13  | 16  | 14  | 16  | 13  | 25  | 22  |
| 37 | 48  | 37  | 133 | 139 | 132 | 92  | 70  | 82  | 54  |
| 19 | 30  | 34  | 32  | 46  | 32  | 43  | 37  | 41  | 23  |
| 32 | 32  | 24  | 31  | 40  | 55  | 38  | 46  | 47  | 31  |
| 33 | 38  | 44  | 55  | 53  | 44  | 34  | 30  | 34  | 45  |
| 25 | 23  | 30  | 71  | 91  | 72  | 64  | 33  | 49  | 23  |
| 31 | 30  | 30  | 57  | 70  | 63  | 52  | 49  | 63  | 34  |
| 37 | 40  | 60  | 212 | 338 | 242 | 338 | 265 | 291 | 157 |
| 49 | 58  | 62  | 103 | 127 | 124 | 95  | 88  | 85  | 65  |
| 28 | 38  | 28  | 60  | 73  | 60  | 75  | 65  | 71  | 34  |
| 69 | 59  | 58  | 99  | 127 | 119 | 117 | 116 | 134 | 76  |
| 21 | 26  | 24  | 61  | 67  | 85  | 71  | 73  | 79  | 44  |
| 46 | 58  | 50  | 132 | 170 | 163 | 163 | 154 | 175 | 71  |
| 52 | 44  | 64  | 160 | 256 | 220 | 295 | 232 | 267 | 133 |
| 15 | 16  | 12  | 60  | 71  | 62  | 74  | 80  | 70  | 36  |
| 30 | 36  | 34  | 58  | 85  | 80  | 74  | 40  | 69  | 36  |
| 41 | 48  | 53  | 69  | 101 | 99  | 79  | 76  | 96  | 51  |
| 62 | 53  | 61  | 78  | 119 | 103 | 96  | 136 | 118 | 61  |
| 48 | 46  | 59  | 51  | 60  | 76  | 73  | 58  | 58  | 53  |
| 28 | 32  | 34  | 65  | 69  | 41  | 47  | 43  | 40  | 30  |
| 85 | 82  | 76  | 251 | 285 | 233 | 250 | 259 | 301 | 160 |
| 17 | 13  | 13  | 20  | 23  | 46  | 21  | 19  | 17  | 20  |
| 43 | 27  | 47  | 75  | 87  | 84  | 85  | 95  | 85  | 55  |
| 87 | 96  | 121 | 123 | 147 | 114 | 128 | 123 | 151 | 112 |
| 28 | 29  | 39  | 32  | 42  | 33  | 51  | 32  | 50  | 28  |
| 55 | 36  | 39  | 33  | 46  | 54  | 53  | 49  | 62  | 39  |
| 64 | 48  | 62  | 95  | 103 | 101 | 118 | 86  | 113 | 85  |
| 36 | 43  | 47  | 49  | 85  | 64  | 41  | 50  | 54  | 35  |

|     |     |     |     |     |     |     |     |     |     |
|-----|-----|-----|-----|-----|-----|-----|-----|-----|-----|
| 23  | 28  | 25  | 19  | 19  | 11  | 18  | 13  | 8   | 12  |
| 108 | 83  | 83  | 305 | 383 | 329 | 422 | 378 | 409 | 200 |
| 40  | 38  | 51  | 187 | 266 | 202 | 167 | 130 | 209 | 91  |
| 115 | 108 | 117 | 373 | 474 | 405 | 446 | 407 | 439 | 179 |
| 197 | 217 | 216 | 141 | 168 | 165 | 298 | 235 | 267 | 215 |
| 194 | 192 | 218 | 146 | 165 | 158 | 201 | 188 | 218 | 163 |
| 123 | 125 | 160 | 81  | 105 | 92  | 124 | 111 | 117 | 115 |
| 100 | 115 | 101 | 99  | 162 | 116 | 193 | 156 | 200 | 99  |
| 225 | 185 | 227 | 129 | 156 | 139 | 221 | 225 | 248 | 204 |
| 169 | 171 | 204 | 79  | 138 | 111 | 139 | 136 | 160 | 167 |
| 307 | 278 | 296 | 358 | 417 | 380 | 797 | 766 | 849 | 431 |
| 45  | 39  | 42  | 74  | 89  | 79  | 65  | 69  | 61  | 52  |
| 19  | 27  | 34  | 66  | 90  | 65  | 68  | 64  | 49  | 41  |
| 26  | 17  | 18  | 32  | 35  | 29  | 23  | 25  | 29  | 21  |
| 88  | 90  | 97  | 74  | 88  | 65  | 97  | 93  | 90  | 114 |
| 79  | 71  | 75  | 135 | 149 | 106 | 150 | 136 | 134 | 93  |
| 10  | 9   | 9   | 55  | 73  | 56  | 71  | 51  | 62  | 26  |
| 8   | 6   | 3   | 6   | 6   | 7   | 10  | 20  | 16  | 8   |
| 16  | 14  | 23  | 20  | 34  | 35  | 36  | 42  | 42  | 24  |
| 46  | 39  | 51  | 182 | 210 | 198 | 140 | 169 | 166 | 102 |
| 56  | 48  | 54  | 71  | 113 | 83  | 135 | 114 | 119 | 71  |
| 41  | 37  | 34  | 28  | 46  | 42  | 48  | 45  | 42  | 36  |
| 78  | 94  | 87  | 89  | 97  | 98  | 168 | 131 | 136 | 87  |
| 59  | 64  | 81  | 83  | 125 | 81  | 85  | 110 | 91  | 79  |
| 53  | 64  | 69  | 119 | 133 | 128 | 179 | 163 | 179 | 87  |
| 85  | 78  | 80  | 102 | 124 | 122 | 130 | 115 | 140 | 71  |
| 61  | 53  | 60  | 102 | 169 | 124 | 150 | 160 | 153 | 64  |
| 63  | 48  | 62  | 93  | 90  | 94  | 90  | 96  | 79  | 53  |
| 45  | 46  | 56  | 58  | 83  | 72  | 77  | 65  | 72  | 43  |
| 43  | 48  | 64  | 47  | 52  | 56  | 57  | 53  | 44  | 44  |
| 9   | 6   | 9   | 16  | 23  | 19  | 12  | 12  | 12  | 7   |
| 24  | 34  | 29  | 51  | 76  | 80  | 73  | 77  | 68  | 36  |
| 47  | 46  | 50  | 95  | 148 | 144 | 125 | 116 | 127 | 56  |
| 40  | 34  | 47  | 187 | 210 | 203 | 160 | 124 | 139 | 60  |
| 48  | 46  | 55  | 76  | 118 | 101 | 97  | 81  | 99  | 59  |
| 24  | 22  | 28  | 27  | 30  | 40  | 23  | 20  | 25  | 17  |
| 44  | 27  | 46  | 85  | 113 | 95  | 73  | 64  | 63  | 52  |
| 19  | 33  | 30  | 61  | 86  | 64  | 53  | 52  | 30  | 34  |
| 50  | 49  | 46  | 79  | 134 | 115 | 64  | 51  | 78  | 42  |
| 62  | 54  | 66  | 201 | 218 | 173 | 167 | 146 | 148 | 64  |
| 75  | 97  | 97  | 291 | 423 | 369 | 469 | 385 | 466 | 214 |

|     |     |     |     |     |     |     |     |     |     |
|-----|-----|-----|-----|-----|-----|-----|-----|-----|-----|
| 152 | 152 | 148 | 113 | 167 | 135 | 239 | 210 | 221 | 96  |
| 66  | 54  | 66  | 277 | 407 | 331 | 490 | 413 | 484 | 204 |
| 68  | 77  | 79  | 677 | 958 | 729 | 810 | 735 | 745 | 343 |
| 38  | 38  | 37  | 147 | 182 | 142 | 204 | 186 | 212 | 73  |
| 51  | 42  | 46  | 437 | 512 | 418 | 630 | 509 | 628 | 236 |
| 54  | 53  | 64  | 233 | 288 | 271 | 457 | 369 | 417 | 144 |
| 46  | 54  | 58  | 176 | 218 | 199 | 187 | 158 | 171 | 81  |
| 135 | 150 | 159 | 503 | 561 | 454 | 739 | 749 | 759 | 321 |
| 55  | 44  | 44  | 39  | 50  | 52  | 61  | 64  | 55  | 51  |
| 74  | 76  | 81  | 73  | 97  | 83  | 136 | 119 | 157 | 86  |
| 83  | 80  | 101 | 80  | 106 | 92  | 110 | 119 | 128 | 82  |
| 36  | 34  | 46  | 13  | 28  | 24  | 19  | 14  | 23  | 29  |
| 85  | 80  | 74  | 278 | 333 | 312 | 277 | 274 | 269 | 137 |
| 32  | 32  | 42  | 21  | 37  | 30  | 38  | 23  | 42  | 26  |
| 103 | 109 | 101 | 238 | 317 | 243 | 331 | 271 | 309 | 159 |
| 39  | 40  | 43  | 66  | 60  | 64  | 42  | 47  | 65  | 33  |
| 135 | 136 | 171 | 166 | 243 | 227 | 224 | 207 | 213 | 113 |
| 179 | 160 | 190 | 374 | 491 | 454 | 518 | 512 | 504 | 201 |
| 35  | 25  | 46  | 62  | 84  | 73  | 71  | 51  | 74  | 32  |
| 42  | 48  | 54  | 187 | 237 | 187 | 233 | 210 | 260 | 94  |
| 55  | 47  | 77  | 245 | 390 | 296 | 258 | 221 | 237 | 115 |
| 24  | 22  | 22  | 46  | 60  | 45  | 58  | 52  | 59  | 28  |
| 39  | 50  | 56  | 84  | 93  | 76  | 107 | 86  | 84  | 56  |
| 38  | 45  | 51  | 146 | 194 | 174 | 133 | 151 | 135 | 64  |
| 28  | 39  | 40  | 72  | 107 | 89  | 118 | 100 | 109 | 58  |
| 25  | 34  | 29  | 99  | 138 | 120 | 106 | 102 | 108 | 63  |
| 40  | 41  | 28  | 151 | 186 | 151 | 173 | 168 | 173 | 86  |
| 34  | 36  | 29  | 75  | 111 | 98  | 92  | 59  | 74  | 41  |
| 23  | 32  | 27  | 34  | 54  | 44  | 40  | 51  | 40  | 20  |
| 84  | 103 | 88  | 97  | 113 | 101 | 107 | 104 | 105 | 71  |
| 53  | 45  | 35  | 57  | 79  | 63  | 60  | 85  | 59  | 58  |
| 20  | 15  | 15  | 155 | 196 | 131 | 161 | 159 | 181 | 82  |
| 41  | 31  | 36  | 322 | 381 | 370 | 408 | 350 | 420 | 199 |
| 67  | 59  | 69  | 92  | 118 | 103 | 210 | 164 | 183 | 116 |
| 27  | 29  | 37  | 304 | 348 | 289 | 308 | 281 | 324 | 142 |
| 15  | 27  | 27  | 110 | 147 | 145 | 181 | 149 | 167 | 99  |
| 47  | 50  | 50  | 370 | 446 | 358 | 454 | 431 | 435 | 212 |
| 74  | 82  | 67  | 710 | 903 | 689 | 918 | 735 | 785 | 377 |
| 39  | 35  | 44  | 255 | 282 | 275 | 275 | 238 | 277 | 116 |
| 25  | 27  | 38  | 140 | 179 | 150 | 186 | 201 | 189 | 87  |
| 41  | 29  | 32  | 159 | 203 | 170 | 218 | 214 | 238 | 94  |

|    |    |    |     |     |     |     |     |     |     |
|----|----|----|-----|-----|-----|-----|-----|-----|-----|
| 65 | 67 | 68 | 396 | 489 | 460 | 569 | 537 | 588 | 252 |
| 25 | 32 | 23 | 39  | 62  | 32  | 55  | 57  | 63  | 37  |
| 62 | 60 | 66 | 203 | 255 | 189 | 166 | 140 | 137 | 61  |
| 60 | 57 | 66 | 225 | 237 | 251 | 260 | 221 | 233 | 101 |
| 32 | 36 | 49 | 80  | 78  | 74  | 58  | 32  | 62  | 39  |
| 57 | 79 | 47 | 50  | 55  | 50  | 49  | 62  | 66  | 46  |
| 47 | 48 | 53 | 53  | 48  | 39  | 52  | 69  | 46  | 48  |
| 41 | 33 | 33 | 86  | 85  | 70  | 68  | 57  | 82  | 44  |
| 66 | 52 | 52 | 116 | 142 | 107 | 130 | 104 | 104 | 44  |
| 47 | 30 | 56 | 116 | 144 | 116 | 108 | 102 | 103 | 43  |
| 25 | 31 | 30 | 68  | 76  | 80  | 100 | 110 | 107 | 48  |
| 13 | 34 | 14 | 50  | 60  | 43  | 57  | 55  | 52  | 34  |
| 24 | 13 | 10 | 56  | 63  | 44  | 30  | 33  | 23  | 20  |
| 46 | 46 | 40 | 57  | 66  | 65  | 44  | 56  | 47  | 45  |
| 12 | 12 | 9  | 18  | 23  | 16  | 15  | 13  | 17  | 7   |
| 23 | 34 | 40 | 73  | 88  | 88  | 47  | 38  | 43  | 43  |
| 71 | 68 | 89 | 68  | 71  | 71  | 75  | 78  | 85  | 75  |
| 27 | 18 | 22 | 46  | 55  | 41  | 52  | 50  | 43  | 37  |
| 31 | 32 | 46 | 61  | 73  | 52  | 43  | 54  | 56  | 43  |
| 33 | 33 | 44 | 46  | 71  | 58  | 43  | 37  | 37  | 39  |
| 69 | 71 | 84 | 73  | 76  | 93  | 133 | 110 | 125 | 53  |
| 19 | 24 | 22 | 51  | 48  | 45  | 34  | 25  | 28  | 21  |
| 16 | 31 | 13 | 8   | 5   | 8   | 14  | 7   | 5   | 11  |
| 38 | 22 | 23 | 23  | 29  | 25  | 21  | 24  | 20  | 16  |
| 5  | 10 | 12 | 4   | 4   | 7   | 7   | 3   | 8   | 7   |
| 19 | 22 | 32 | 36  | 26  | 27  | 39  | 29  | 23  | 21  |
| 55 | 67 | 58 | 63  | 72  | 65  | 71  | 38  | 60  | 52  |
| 16 | 12 | 18 | 13  | 16  | 20  | 13  | 8   | 10  | 9   |
| 14 | 31 | 29 | 31  | 26  | 31  | 33  | 31  | 37  | 20  |
| 36 | 31 | 45 | 170 | 233 | 193 | 260 | 253 | 253 | 120 |
| 38 | 44 | 34 | 27  | 26  | 24  | 33  | 23  | 28  | 37  |
| 58 | 54 | 69 | 71  | 88  | 88  | 125 | 126 | 146 | 72  |
| 30 | 27 | 30 | 57  | 91  | 77  | 86  | 68  | 98  | 31  |
| 45 | 37 | 55 | 72  | 99  | 91  | 128 | 105 | 136 | 49  |
| 24 | 26 | 22 | 30  | 22  | 26  | 27  | 13  | 29  | 31  |
| 49 | 52 | 54 | 36  | 58  | 52  | 66  | 74  | 61  | 49  |
| 18 | 19 | 19 | 15  | 26  | 23  | 19  | 22  | 15  | 16  |
| 48 | 37 | 45 | 78  | 90  | 77  | 98  | 105 | 124 | 47  |
| 11 | 15 | 14 | 11  | 4   | 10  | 7   | 9   | 12  | 6   |
| 14 | 22 | 15 | 14  | 16  | 19  | 14  | 14  | 18  | 12  |
| 14 | 18 | 21 | 17  | 18  | 13  | 13  | 13  | 18  | 20  |

|    |    |    |     |     |     |     |     |     |    |
|----|----|----|-----|-----|-----|-----|-----|-----|----|
| 14 | 12 | 21 | 27  | 49  | 28  | 28  | 19  | 20  | 18 |
| 39 | 33 | 40 | 45  | 60  | 54  | 61  | 53  | 49  | 25 |
| 40 | 42 | 43 | 64  | 83  | 66  | 111 | 88  | 118 | 52 |
| 34 | 39 | 46 | 22  | 23  | 33  | 30  | 23  | 36  | 28 |
| 60 | 67 | 78 | 27  | 36  | 44  | 46  | 32  | 35  | 46 |
| 79 | 81 | 64 | 105 | 113 | 126 | 83  | 93  | 95  | 89 |
| 67 | 51 | 73 | 74  | 122 | 72  | 102 | 88  | 95  | 63 |
| 43 | 49 | 60 | 92  | 110 | 112 | 65  | 72  | 67  | 41 |
| 61 | 59 | 64 | 111 | 85  | 110 | 95  | 85  | 78  | 54 |
| 48 | 34 | 47 | 58  | 57  | 58  | 59  | 47  | 46  | 45 |
| 51 | 60 | 48 | 121 | 128 | 124 | 131 | 122 | 103 | 75 |
| 14 | 9  | 19 | 35  | 37  | 34  | 27  | 24  | 24  | 15 |
| 44 | 38 | 71 | 118 | 190 | 171 | 135 | 133 | 145 | 83 |
| 33 | 30 | 41 | 44  | 72  | 57  | 58  | 60  | 59  | 47 |
| 77 | 85 | 78 | 80  | 79  | 79  | 69  | 78  | 66  | 63 |
| 57 | 40 | 41 | 79  | 111 | 90  | 114 | 83  | 103 | 55 |
| 51 | 63 | 55 | 45  | 88  | 68  | 58  | 39  | 59  | 46 |
| 30 | 38 | 42 | 30  | 39  | 25  | 23  | 27  | 39  | 30 |
| 35 | 46 | 34 | 41  | 51  | 48  | 44  | 45  | 51  | 37 |
| 62 | 65 | 58 | 105 | 146 | 114 | 151 | 133 | 153 | 93 |
| 40 | 32 | 37 | 45  | 54  | 54  | 45  | 38  | 49  | 36 |
| 61 | 56 | 74 | 75  | 101 | 82  | 124 | 84  | 112 | 64 |
| 54 | 46 | 41 | 65  | 87  | 62  | 43  | 41  | 47  | 44 |
| 32 | 29 | 25 | 37  | 46  | 41  | 34  | 37  | 42  | 32 |
| 40 | 45 | 45 | 38  | 45  | 38  | 35  | 32  | 43  | 40 |
| 9  | 17 | 16 | 15  | 18  | 11  | 17  | 11  | 14  | 14 |
| 53 | 41 | 58 | 45  | 70  | 53  | 50  | 57  | 56  | 39 |
| 28 | 35 | 32 | 37  | 39  | 31  | 40  | 42  | 53  | 32 |
| 23 | 17 | 29 | 17  | 17  | 17  | 8   | 14  | 18  | 22 |
| 40 | 45 | 39 | 53  | 48  | 43  | 36  | 39  | 42  | 51 |
| 22 | 22 | 14 | 26  | 19  | 32  | 27  | 16  | 22  | 18 |
| 15 | 25 | 23 | 29  | 27  | 19  | 20  | 25  | 20  | 26 |
| 49 | 48 | 44 | 24  | 21  | 24  | 37  | 25  | 22  | 46 |
| 26 | 40 | 38 | 23  | 28  | 20  | 23  | 28  | 20  | 31 |
| 58 | 59 | 62 | 44  | 60  | 54  | 55  | 44  | 59  | 58 |
| 42 | 49 | 50 | 68  | 99  | 84  | 61  | 87  | 80  | 49 |
| 25 | 32 | 22 | 59  | 63  | 46  | 59  | 62  | 48  | 23 |
| 30 | 42 | 34 | 90  | 121 | 80  | 72  | 65  | 91  | 34 |
| 36 | 37 | 42 | 56  | 78  | 60  | 59  | 53  | 46  | 35 |
| 16 | 13 | 13 | 38  | 54  | 40  | 54  | 43  | 41  | 26 |
| 41 | 56 | 42 | 69  | 85  | 75  | 85  | 78  | 92  | 33 |

|     |     |     |     |     |     |     |     |     |     |
|-----|-----|-----|-----|-----|-----|-----|-----|-----|-----|
| 51  | 59  | 57  | 114 | 142 | 110 | 105 | 103 | 108 | 62  |
| 41  | 50  | 65  | 150 | 187 | 170 | 179 | 161 | 202 | 84  |
| 27  | 25  | 29  | 125 | 149 | 159 | 184 | 151 | 167 | 69  |
| 23  | 12  | 22  | 57  | 79  | 70  | 74  | 53  | 68  | 36  |
| 28  | 42  | 35  | 163 | 168 | 133 | 130 | 127 | 154 | 65  |
| 62  | 53  | 72  | 135 | 166 | 141 | 169 | 181 | 177 | 80  |
| 83  | 67  | 74  | 452 | 593 | 494 | 755 | 620 | 706 | 309 |
| 54  | 74  | 62  | 292 | 344 | 279 | 392 | 356 | 405 | 137 |
| 67  | 70  | 62  | 497 | 667 | 538 | 928 | 816 | 833 | 307 |
| 22  | 21  | 27  | 46  | 52  | 54  | 63  | 76  | 83  | 33  |
| 59  | 59  | 51  | 90  | 120 | 120 | 66  | 66  | 100 | 80  |
| 4   | 3   | 5   | 18  | 21  | 20  | 25  | 13  | 16  | 12  |
| 27  | 20  | 19  | 19  | 24  | 27  | 27  | 21  | 28  | 20  |
| 84  | 101 | 101 | 164 | 205 | 168 | 188 | 158 | 207 | 120 |
| 49  | 57  | 59  | 106 | 116 | 123 | 98  | 84  | 94  | 52  |
| 41  | 43  | 42  | 63  | 92  | 74  | 74  | 73  | 92  | 53  |
| 81  | 48  | 58  | 107 | 104 | 98  | 76  | 71  | 89  | 48  |
| 39  | 38  | 54  | 57  | 72  | 41  | 49  | 51  | 51  | 36  |
| 36  | 37  | 48  | 60  | 67  | 69  | 44  | 57  | 52  | 51  |
| 21  | 12  | 28  | 61  | 75  | 64  | 38  | 39  | 39  | 20  |
| 50  | 41  | 38  | 140 | 149 | 134 | 172 | 146 | 172 | 79  |
| 80  | 80  | 66  | 109 | 172 | 137 | 152 | 118 | 138 | 90  |
| 47  | 43  | 46  | 49  | 51  | 53  | 68  | 42  | 52  | 48  |
| 42  | 43  | 41  | 100 | 117 | 89  | 152 | 133 | 139 | 62  |
| 36  | 34  | 39  | 85  | 88  | 80  | 117 | 106 | 116 | 70  |
| 43  | 35  | 37  | 61  | 53  | 43  | 81  | 63  | 58  | 49  |
| 47  | 57  | 51  | 118 | 155 | 162 | 135 | 122 | 160 | 78  |
| 60  | 55  | 79  | 225 | 272 | 230 | 276 | 192 | 239 | 112 |
| 34  | 38  | 36  | 67  | 100 | 88  | 96  | 108 | 133 | 78  |
| 90  | 72  | 108 | 139 | 168 | 144 | 167 | 147 | 189 | 115 |
| 55  | 59  | 57  | 119 | 134 | 116 | 140 | 133 | 136 | 67  |
| 53  | 44  | 55  | 98  | 101 | 96  | 120 | 101 | 101 | 62  |
| 62  | 66  | 76  | 156 | 179 | 159 | 149 | 151 | 177 | 63  |
| 183 | 167 | 197 | 203 | 292 | 240 | 296 | 269 | 263 | 139 |
| 47  | 46  | 58  | 47  | 74  | 50  | 71  | 70  | 60  | 31  |
| 73  | 59  | 78  | 207 | 236 | 196 | 407 | 345 | 388 | 172 |
| 41  | 37  | 46  | 101 | 116 | 87  | 129 | 112 | 117 | 61  |
| 74  | 70  | 70  | 128 | 124 | 123 | 127 | 145 | 140 | 99  |
| 58  | 56  | 46  | 70  | 90  | 68  | 64  | 61  | 67  | 43  |
| 59  | 63  | 79  | 103 | 144 | 113 | 123 | 117 | 145 | 60  |
| 16  | 19  | 25  | 54  | 95  | 58  | 73  | 59  | 60  | 19  |

|    |    |    |     |     |     |     |     |     |     |
|----|----|----|-----|-----|-----|-----|-----|-----|-----|
| 45 | 45 | 51 | 120 | 163 | 142 | 168 | 173 | 178 | 74  |
| 90 | 80 | 86 | 144 | 172 | 176 | 198 | 177 | 213 | 94  |
| 30 | 29 | 35 | 107 | 174 | 102 | 169 | 145 | 178 | 53  |
| 40 | 58 | 78 | 184 | 202 | 162 | 184 | 171 | 190 | 83  |
| 90 | 97 | 99 | 208 | 255 | 229 | 222 | 224 | 227 | 128 |
| 64 | 74 | 72 | 174 | 202 | 182 | 209 | 215 | 192 | 97  |
| 96 | 78 | 92 | 368 | 496 | 493 | 619 | 604 | 680 | 310 |
| 44 | 45 | 56 | 233 | 250 | 229 | 295 | 271 | 277 | 133 |
| 49 | 49 | 60 | 193 | 186 | 184 | 86  | 81  | 90  | 54  |
| 53 | 74 | 62 | 73  | 68  | 74  | 80  | 82  | 62  | 45  |
| 75 | 61 | 73 | 99  | 128 | 126 | 141 | 121 | 117 | 74  |
| 55 | 74 | 61 | 50  | 59  | 54  | 57  | 53  | 52  | 58  |
| 30 | 32 | 25 | 295 | 354 | 238 | 355 | 310 | 329 | 118 |
| 25 | 24 | 35 | 300 | 378 | 314 | 259 | 270 | 317 | 144 |
| 13 | 12 | 13 | 14  | 23  | 15  | 17  | 13  | 18  | 12  |
| 41 | 32 | 39 | 82  | 109 | 89  | 88  | 68  | 90  | 47  |
| 12 | 16 | 17 | 56  | 63  | 73  | 66  | 38  | 63  | 29  |
| 33 | 32 | 30 | 271 | 346 | 259 | 438 | 374 | 453 | 183 |
| 40 | 34 | 34 | 73  | 106 | 83  | 72  | 67  | 70  | 54  |
| 87 | 74 | 73 | 267 | 324 | 266 | 372 | 326 | 334 | 186 |
| 44 | 39 | 41 | 68  | 123 | 82  | 99  | 77  | 100 | 49  |
| 66 | 80 | 82 | 89  | 150 | 123 | 102 | 94  | 109 | 78  |
| 30 | 42 | 36 | 54  | 50  | 61  | 51  | 64  | 56  | 36  |
| 41 | 35 | 56 | 90  | 119 | 84  | 121 | 92  | 91  | 62  |
| 27 | 34 | 25 | 25  | 33  | 32  | 30  | 42  | 41  | 36  |
| 53 | 57 | 64 | 96  | 121 | 141 | 111 | 96  | 96  | 62  |
| 24 | 31 | 40 | 43  | 62  | 66  | 72  | 76  | 66  | 43  |
| 44 | 52 | 53 | 35  | 33  | 40  | 39  | 27  | 35  | 47  |
| 47 | 51 | 46 | 100 | 112 | 115 | 90  | 95  | 107 | 62  |
| 36 | 35 | 43 | 98  | 143 | 124 | 164 | 155 | 169 | 67  |
| 17 | 37 | 37 | 40  | 56  | 47  | 35  | 35  | 55  | 31  |
| 73 | 71 | 68 | 108 | 148 | 116 | 153 | 134 | 155 | 86  |
| 28 | 26 | 29 | 59  | 81  | 65  | 75  | 67  | 74  | 37  |
| 55 | 28 | 44 | 79  | 80  | 56  | 71  | 45  | 58  | 44  |
| 58 | 40 | 49 | 71  | 106 | 67  | 76  | 73  | 62  | 42  |
| 30 | 40 | 41 | 87  | 104 | 77  | 73  | 70  | 82  | 49  |
| 24 | 31 | 20 | 44  | 55  | 57  | 42  | 41  | 58  | 28  |
| 47 | 54 | 45 | 98  | 105 | 100 | 92  | 83  | 75  | 62  |
| 53 | 67 | 34 | 249 | 318 | 287 | 238 | 256 | 287 | 110 |
| 46 | 64 | 72 | 68  | 87  | 68  | 78  | 52  | 73  | 50  |
| 60 | 59 | 65 | 80  | 91  | 98  | 81  | 100 | 97  | 70  |

|     |     |     |     |     |     |     |     |     |     |
|-----|-----|-----|-----|-----|-----|-----|-----|-----|-----|
| 55  | 43  | 55  | 171 | 199 | 159 | 129 | 132 | 159 | 75  |
| 42  | 34  | 52  | 65  | 70  | 80  | 37  | 32  | 52  | 33  |
| 33  | 34  | 52  | 103 | 99  | 96  | 83  | 69  | 83  | 35  |
| 23  | 30  | 28  | 116 | 136 | 121 | 91  | 77  | 84  | 51  |
| 57  | 52  | 52  | 125 | 177 | 145 | 140 | 116 | 128 | 63  |
| 21  | 22  | 22  | 41  | 54  | 45  | 30  | 23  | 36  | 19  |
| 21  | 14  | 15  | 33  | 43  | 34  | 17  | 20  | 25  | 21  |
| 27  | 35  | 30  | 61  | 79  | 61  | 50  | 46  | 41  | 31  |
| 15  | 12  | 17  | 16  | 25  | 14  | 18  | 15  | 24  | 16  |
| 51  | 29  | 40  | 64  | 89  | 81  | 81  | 80  | 70  | 45  |
| 41  | 38  | 50  | 54  | 73  | 51  | 67  | 38  | 57  | 40  |
| 60  | 48  | 79  | 71  | 86  | 69  | 96  | 81  | 96  | 64  |
| 67  | 67  | 76  | 81  | 90  | 98  | 87  | 63  | 80  | 55  |
| 57  | 86  | 74  | 48  | 72  | 66  | 66  | 49  | 69  | 73  |
| 70  | 81  | 72  | 131 | 194 | 133 | 163 | 172 | 191 | 74  |
| 107 | 99  | 103 | 111 | 152 | 121 | 134 | 122 | 127 | 93  |
| 26  | 34  | 38  | 125 | 125 | 93  | 86  | 79  | 82  | 52  |
| 26  | 29  | 28  | 64  | 66  | 71  | 64  | 57  | 64  | 36  |
| 43  | 34  | 50  | 61  | 79  | 72  | 46  | 50  | 76  | 49  |
| 34  | 57  | 42  | 75  | 107 | 112 | 124 | 90  | 100 | 66  |
| 37  | 41  | 43  | 98  | 122 | 110 | 125 | 97  | 99  | 44  |
| 47  | 37  | 51  | 74  | 98  | 89  | 102 | 81  | 107 | 67  |
| 57  | 52  | 60  | 178 | 245 | 225 | 266 | 216 | 242 | 125 |
| 62  | 73  | 82  | 135 | 177 | 157 | 189 | 188 | 175 | 95  |
| 32  | 32  | 32  | 40  | 45  | 58  | 51  | 55  | 69  | 49  |
| 54  | 67  | 73  | 251 | 318 | 304 | 427 | 386 | 398 | 177 |
| 36  | 28  | 33  | 85  | 130 | 123 | 111 | 114 | 115 | 65  |
| 32  | 26  | 29  | 166 | 203 | 185 | 137 | 134 | 148 | 61  |
| 106 | 106 | 130 | 135 | 206 | 167 | 205 | 175 | 188 | 100 |
| 35  | 44  | 45  | 73  | 73  | 71  | 66  | 69  | 82  | 48  |
| 37  | 28  | 37  | 35  | 50  | 32  | 43  | 37  | 40  | 30  |
| 31  | 33  | 39  | 42  | 42  | 43  | 31  | 27  | 31  | 31  |
| 106 | 91  | 79  | 54  | 77  | 73  | 97  | 97  | 115 | 78  |
| 66  | 68  | 56  | 127 | 174 | 143 | 138 | 139 | 132 | 73  |
| 23  | 23  | 17  | 21  | 42  | 35  | 31  | 24  | 23  | 20  |
| 15  | 30  | 26  | 46  | 33  | 42  | 32  | 32  | 40  | 19  |
| 27  | 24  | 26  | 28  | 39  | 32  | 31  | 32  | 29  | 16  |
| 62  | 65  | 78  | 98  | 106 | 87  | 85  | 80  | 73  | 68  |
| 80  | 88  | 99  | 51  | 80  | 57  | 89  | 89  | 86  | 80  |
| 52  | 42  | 58  | 81  | 95  | 77  | 64  | 60  | 80  | 51  |
| 80  | 89  | 87  | 194 | 252 | 213 | 260 | 215 | 300 | 117 |



|     |     |     |     |     |     |     |     |     |     |
|-----|-----|-----|-----|-----|-----|-----|-----|-----|-----|
| 52  | 70  | 67  | 147 | 194 | 163 | 189 | 176 | 188 | 104 |
| 106 | 107 | 87  | 152 | 164 | 179 | 166 | 149 | 166 | 99  |
| 97  | 87  | 94  | 267 | 369 | 334 | 291 | 258 | 331 | 143 |
| 30  | 18  | 19  | 37  | 39  | 24  | 17  | 18  | 26  | 20  |
| 69  | 84  | 81  | 183 | 218 | 215 | 178 | 171 | 182 | 82  |
| 68  | 82  | 82  | 217 | 290 | 251 | 316 | 246 | 298 | 140 |
| 22  | 27  | 17  | 39  | 40  | 35  | 32  | 30  | 45  | 29  |
| 28  | 25  | 33  | 22  | 23  | 22  | 20  | 28  | 20  | 26  |
| 10  | 5   | 25  | 30  | 22  | 20  | 29  | 35  | 33  | 16  |
| 44  | 42  | 43  | 30  | 31  | 28  | 32  | 28  | 19  | 35  |
| 52  | 53  | 55  | 24  | 47  | 51  | 29  | 29  | 41  | 43  |
| 41  | 48  | 37  | 37  | 32  | 31  | 25  | 19  | 30  | 29  |
| 39  | 38  | 35  | 34  | 40  | 30  | 38  | 37  | 26  | 29  |
| 38  | 39  | 42  | 28  | 37  | 26  | 25  | 25  | 24  | 37  |
| 41  | 51  | 65  | 103 | 127 | 104 | 95  | 78  | 83  | 32  |
| 59  | 73  | 97  | 180 | 228 | 212 | 193 | 157 | 165 | 120 |
| 81  | 88  | 94  | 230 | 288 | 252 | 257 | 224 | 264 | 115 |
| 24  | 25  | 26  | 31  | 36  | 37  | 31  | 28  | 35  | 21  |
| 57  | 60  | 56  | 62  | 81  | 69  | 84  | 56  | 85  | 56  |
| 53  | 43  | 61  | 103 | 142 | 128 | 152 | 112 | 153 | 88  |
| 82  | 80  | 91  | 96  | 154 | 134 | 122 | 95  | 122 | 65  |
| 44  | 41  | 50  | 128 | 194 | 112 | 152 | 128 | 132 | 65  |
| 65  | 62  | 64  | 155 | 183 | 173 | 227 | 199 | 193 | 108 |
| 44  | 53  | 41  | 84  | 96  | 96  | 133 | 101 | 121 | 63  |
| 68  | 57  | 72  | 125 | 157 | 146 | 193 | 177 | 207 | 93  |
| 87  | 57  | 75  | 84  | 101 | 95  | 154 | 154 | 168 | 74  |
| 52  | 49  | 46  | 75  | 75  | 72  | 62  | 70  | 86  | 43  |
| 43  | 29  | 40  | 47  | 67  | 52  | 54  | 56  | 50  | 28  |
| 102 | 107 | 113 | 150 | 176 | 153 | 149 | 138 | 157 | 98  |
| 46  | 62  | 63  | 95  | 103 | 116 | 75  | 82  | 83  | 58  |
| 51  | 31  | 45  | 43  | 46  | 49  | 38  | 38  | 41  | 39  |
| 32  | 36  | 32  | 128 | 116 | 141 | 136 | 138 | 128 | 67  |
| 52  | 47  | 54  | 94  | 108 | 84  | 121 | 104 | 98  | 46  |
| 55  | 61  | 62  | 257 | 380 | 344 | 451 | 406 | 421 | 192 |
| 48  | 48  | 65  | 230 | 370 | 308 | 272 | 254 | 293 | 126 |
| 54  | 69  | 69  | 128 | 173 | 137 | 122 | 145 | 155 | 90  |
| 45  | 44  | 46  | 148 | 172 | 175 | 138 | 118 | 145 | 70  |
| 68  | 58  | 72  | 188 | 238 | 216 | 213 | 192 | 206 | 93  |
| 22  | 31  | 43  | 54  | 77  | 46  | 122 | 106 | 126 | 30  |
| 96  | 91  | 85  | 188 | 233 | 202 | 208 | 197 | 217 | 110 |
| 37  | 54  | 32  | 47  | 68  | 60  | 78  | 71  | 77  | 50  |

|     |     |     |     |     |     |     |     |     |     |
|-----|-----|-----|-----|-----|-----|-----|-----|-----|-----|
| 50  | 60  | 57  | 97  | 150 | 135 | 172 | 169 | 198 | 70  |
| 14  | 11  | 15  | 14  | 19  | 18  | 19  | 15  | 16  | 17  |
| 47  | 44  | 44  | 276 | 316 | 253 | 204 | 181 | 190 | 90  |
| 72  | 65  | 53  | 45  | 47  | 46  | 41  | 40  | 42  | 48  |
| 18  | 18  | 24  | 40  | 53  | 49  | 44  | 31  | 28  | 23  |
| 34  | 40  | 33  | 78  | 94  | 70  | 76  | 71  | 67  | 46  |
| 60  | 80  | 57  | 104 | 157 | 150 | 146 | 151 | 162 | 80  |
| 83  | 70  | 89  | 82  | 70  | 81  | 69  | 72  | 78  | 62  |
| 82  | 83  | 93  | 255 | 318 | 278 | 487 | 433 | 514 | 226 |
| 98  | 92  | 93  | 86  | 93  | 103 | 110 | 78  | 92  | 72  |
| 57  | 66  | 65  | 57  | 75  | 70  | 91  | 76  | 97  | 56  |
| 103 | 106 | 112 | 106 | 129 | 112 | 153 | 116 | 114 | 69  |
| 57  | 58  | 51  | 184 | 254 | 198 | 91  | 96  | 109 | 56  |
| 52  | 61  | 81  | 87  | 143 | 113 | 106 | 82  | 103 | 66  |
| 22  | 40  | 32  | 115 | 151 | 120 | 74  | 55  | 58  | 35  |
| 40  | 46  | 36  | 43  | 79  | 57  | 65  | 60  | 59  | 41  |
| 55  | 67  | 70  | 110 | 128 | 113 | 108 | 112 | 120 | 71  |
| 28  | 28  | 30  | 32  | 34  | 41  | 32  | 48  | 35  | 34  |
| 51  | 46  | 41  | 50  | 80  | 65  | 67  | 56  | 57  | 45  |
| 41  | 43  | 46  | 79  | 80  | 78  | 67  | 66  | 74  | 46  |
| 34  | 25  | 44  | 23  | 32  | 28  | 33  | 27  | 26  | 25  |
| 41  | 48  | 64  | 76  | 98  | 90  | 72  | 59  | 85  | 47  |
| 93  | 81  | 77  | 121 | 148 | 135 | 154 | 159 | 170 | 101 |
| 40  | 29  | 44  | 138 | 160 | 151 | 144 | 145 | 148 | 81  |
| 29  | 33  | 37  | 115 | 149 | 124 | 110 | 92  | 101 | 42  |
| 44  | 29  | 40  | 138 | 185 | 152 | 160 | 118 | 135 | 59  |
| 31  | 32  | 42  | 82  | 123 | 91  | 53  | 54  | 73  | 57  |
| 19  | 25  | 23  | 58  | 69  | 45  | 53  | 46  | 56  | 35  |
| 27  | 19  | 31  | 64  | 70  | 64  | 59  | 30  | 66  | 40  |
| 39  | 32  | 41  | 56  | 71  | 82  | 61  | 62  | 53  | 48  |
| 48  | 60  | 55  | 134 | 177 | 168 | 121 | 122 | 121 | 76  |
| 33  | 25  | 35  | 76  | 99  | 85  | 122 | 78  | 106 | 58  |
| 42  | 37  | 38  | 142 | 212 | 204 | 187 | 150 | 203 | 82  |
| 54  | 57  | 66  | 228 | 305 | 245 | 261 | 259 | 279 | 127 |
| 44  | 49  | 56  | 453 | 512 | 464 | 472 | 443 | 508 | 184 |
| 61  | 67  | 75  | 278 | 362 | 271 | 543 | 487 | 578 | 220 |
| 55  | 37  | 41  | 90  | 114 | 109 | 182 | 169 | 175 | 92  |
| 27  | 54  | 57  | 89  | 106 | 101 | 157 | 109 | 131 | 93  |
| 10  | 5   | 7   | 19  | 31  | 24  | 36  | 25  | 38  | 14  |
| 60  | 54  | 64  | 293 | 386 | 357 | 440 | 366 | 408 | 188 |
| 20  | 24  | 36  | 147 | 176 | 157 | 162 | 164 | 147 | 72  |

|     |    |     |     |     |     |     |     |     |     |
|-----|----|-----|-----|-----|-----|-----|-----|-----|-----|
| 20  | 15 | 21  | 166 | 215 | 214 | 121 | 102 | 119 | 45  |
| 36  | 31 | 32  | 85  | 87  | 74  | 114 | 98  | 112 | 61  |
| 42  | 48 | 48  | 198 | 310 | 236 | 376 | 283 | 342 | 145 |
| 31  | 28 | 31  | 65  | 102 | 91  | 74  | 55  | 61  | 42  |
| 47  | 58 | 58  | 132 | 198 | 168 | 151 | 123 | 153 | 81  |
| 53  | 37 | 44  | 118 | 160 | 126 | 92  | 79  | 94  | 50  |
| 35  | 39 | 42  | 160 | 195 | 201 | 152 | 152 | 157 | 72  |
| 38  | 28 | 37  | 81  | 90  | 74  | 70  | 51  | 67  | 47  |
| 27  | 27 | 24  | 88  | 137 | 99  | 84  | 61  | 89  | 40  |
| 55  | 51 | 56  | 137 | 177 | 181 | 153 | 130 | 136 | 59  |
| 45  | 56 | 38  | 172 | 224 | 195 | 204 | 202 | 210 | 109 |
| 40  | 31 | 33  | 77  | 108 | 87  | 88  | 76  | 80  | 41  |
| 36  | 37 | 42  | 91  | 106 | 102 | 115 | 105 | 102 | 46  |
| 19  | 17 | 16  | 56  | 48  | 62  | 54  | 68  | 63  | 31  |
| 30  | 35 | 39  | 38  | 55  | 37  | 68  | 56  | 62  | 41  |
| 53  | 45 | 53  | 52  | 70  | 49  | 49  | 48  | 50  | 47  |
| 65  | 65 | 69  | 58  | 64  | 84  | 80  | 72  | 91  | 59  |
| 82  | 79 | 96  | 90  | 89  | 88  | 117 | 114 | 122 | 91  |
| 35  | 35 | 37  | 89  | 123 | 106 | 105 | 84  | 107 | 66  |
| 100 | 92 | 112 | 186 | 243 | 224 | 216 | 187 | 199 | 147 |
| 32  | 23 | 27  | 32  | 35  | 43  | 37  | 23  | 40  | 27  |
| 25  | 35 | 24  | 55  | 67  | 50  | 51  | 40  | 50  | 29  |
| 26  | 26 | 28  | 55  | 64  | 53  | 50  | 58  | 70  | 45  |
| 3   | 3  | 3   | 2   | 4   | 2   | 4   | 6   | 7   | 6   |
| 27  | 36 | 26  | 43  | 51  | 45  | 29  | 36  | 39  | 21  |
| 52  | 45 | 63  | 365 | 510 | 451 | 570 | 524 | 587 | 285 |
| 22  | 21 | 17  | 20  | 14  | 16  | 25  | 17  | 15  | 17  |
| 84  | 89 | 97  | 159 | 196 | 186 | 99  | 132 | 107 | 52  |
| 29  | 32 | 30  | 122 | 192 | 140 | 154 | 160 | 149 | 64  |
| 11  | 14 | 11  | 28  | 41  | 31  | 21  | 27  | 23  | 17  |
| 9   | 24 | 21  | 57  | 81  | 65  | 73  | 71  | 75  | 29  |
| 85  | 58 | 75  | 211 | 271 | 236 | 216 | 151 | 178 | 100 |
| 50  | 41 | 39  | 171 | 182 | 150 | 216 | 187 | 205 | 86  |
| 52  | 49 | 43  | 54  | 70  | 60  | 41  | 34  | 58  | 43  |
| 46  | 61 | 51  | 71  | 81  | 67  | 74  | 58  | 55  | 63  |
| 45  | 51 | 60  | 76  | 76  | 68  | 107 | 102 | 96  | 36  |
| 22  | 14 | 23  | 30  | 51  | 39  | 41  | 42  | 36  | 21  |
| 48  | 54 | 59  | 83  | 100 | 97  | 73  | 74  | 88  | 52  |
| 27  | 29 | 31  | 26  | 35  | 39  | 26  | 28  | 21  | 29  |
| 65  | 52 | 67  | 99  | 111 | 95  | 65  | 63  | 73  | 63  |
| 69  | 57 | 72  | 86  | 82  | 72  | 113 | 98  | 87  | 66  |

|     |     |     |     |     |     |     |     |     |     |
|-----|-----|-----|-----|-----|-----|-----|-----|-----|-----|
| 52  | 52  | 56  | 77  | 106 | 95  | 105 | 99  | 126 | 68  |
| 44  | 44  | 43  | 105 | 146 | 126 | 127 | 98  | 99  | 55  |
| 46  | 36  | 34  | 39  | 40  | 37  | 32  | 37  | 38  | 36  |
| 40  | 44  | 56  | 72  | 93  | 63  | 99  | 99  | 104 | 49  |
| 14  | 16  | 14  | 9   | 8   | 7   | 9   | 5   | 12  | 7   |
| 35  | 27  | 34  | 42  | 53  | 38  | 40  | 40  | 45  | 40  |
| 29  | 27  | 37  | 92  | 143 | 107 | 87  | 75  | 99  | 50  |
| 3   | 3   | 8   | 13  | 8   | 8   | 5   | 4   | 8   | 5   |
| 13  | 16  | 19  | 31  | 34  | 29  | 30  | 13  | 29  | 29  |
| 41  | 42  | 31  | 78  | 114 | 80  | 67  | 69  | 77  | 35  |
| 55  | 51  | 46  | 77  | 77  | 66  | 95  | 85  | 85  | 64  |
| 13  | 23  | 20  | 10  | 7   | 13  | 11  | 8   | 7   | 17  |
| 46  | 51  | 42  | 70  | 67  | 56  | 49  | 36  | 48  | 30  |
| 40  | 37  | 51  | 67  | 80  | 70  | 42  | 32  | 28  | 26  |
| 18  | 30  | 27  | 38  | 54  | 55  | 49  | 40  | 42  | 30  |
| 40  | 34  | 37  | 43  | 50  | 60  | 67  | 53  | 68  | 48  |
| 45  | 74  | 62  | 162 | 192 | 166 | 158 | 167 | 188 | 91  |
| 19  | 17  | 20  | 27  | 37  | 28  | 34  | 30  | 23  | 21  |
| 42  | 45  | 60  | 133 | 199 | 138 | 129 | 110 | 132 | 65  |
| 77  | 61  | 60  | 193 | 282 | 211 | 282 | 282 | 251 | 138 |
| 15  | 7   | 8   | 19  | 29  | 24  | 33  | 32  | 40  | 11  |
| 31  | 32  | 35  | 86  | 141 | 97  | 131 | 106 | 132 | 40  |
| 136 | 148 | 152 | 187 | 237 | 203 | 227 | 195 | 223 | 159 |
| 40  | 50  | 47  | 131 | 146 | 150 | 164 | 148 | 156 | 65  |
| 21  | 22  | 26  | 32  | 53  | 45  | 65  | 54  | 64  | 35  |
| 51  | 50  | 35  | 183 | 232 | 187 | 197 | 155 | 192 | 112 |
| 37  | 36  | 49  | 135 | 191 | 145 | 160 | 119 | 171 | 51  |
| 21  | 12  | 17  | 40  | 55  | 41  | 37  | 30  | 29  | 21  |
| 40  | 45  | 40  | 93  | 111 | 93  | 96  | 94  | 103 | 50  |
| 23  | 15  | 21  | 56  | 71  | 53  | 66  | 53  | 38  | 27  |
| 1   | 1   | 0   | 1   | 2   | 2   | 3   | 3   | 5   | 3   |
| 62  | 54  | 50  | 103 | 129 | 90  | 118 | 142 | 112 | 72  |
| 66  | 67  | 65  | 113 | 121 | 100 | 126 | 116 | 118 | 80  |
| 64  | 63  | 74  | 85  | 99  | 102 | 131 | 131 | 141 | 87  |
| 74  | 92  | 99  | 120 | 170 | 124 | 134 | 135 | 117 | 89  |
| 50  | 72  | 85  | 105 | 128 | 111 | 87  | 101 | 111 | 81  |
| 37  | 35  | 47  | 56  | 67  | 49  | 60  | 42  | 61  | 45  |
| 53  | 54  | 56  | 84  | 117 | 80  | 93  | 100 | 111 | 67  |
| 41  | 39  | 48  | 52  | 73  | 62  | 79  | 75  | 85  | 52  |
| 53  | 54  | 61  | 87  | 133 | 120 | 147 | 140 | 126 | 72  |
| 64  | 55  | 59  | 89  | 136 | 111 | 128 | 142 | 147 | 57  |

|     |     |     |     |     |     |     |     |     |     |
|-----|-----|-----|-----|-----|-----|-----|-----|-----|-----|
| 47  | 46  | 61  | 105 | 119 | 107 | 120 | 123 | 138 | 69  |
| 57  | 68  | 62  | 103 | 134 | 103 | 147 | 114 | 147 | 69  |
| 48  | 41  | 51  | 57  | 91  | 75  | 71  | 55  | 69  | 48  |
| 22  | 23  | 16  | 29  | 37  | 32  | 27  | 38  | 36  | 19  |
| 31  | 32  | 34  | 65  | 66  | 69  | 76  | 43  | 61  | 38  |
| 27  | 23  | 32  | 29  | 32  | 29  | 32  | 35  | 41  | 32  |
| 22  | 28  | 40  | 83  | 69  | 72  | 65  | 44  | 72  | 30  |
| 56  | 47  | 61  | 71  | 85  | 86  | 77  | 63  | 97  | 54  |
| 22  | 25  | 41  | 64  | 89  | 43  | 75  | 58  | 64  | 32  |
| 40  | 24  | 28  | 45  | 54  | 44  | 49  | 66  | 60  | 23  |
| 54  | 57  | 49  | 65  | 99  | 85  | 108 | 103 | 105 | 46  |
| 72  | 66  | 65  | 119 | 150 | 126 | 125 | 111 | 109 | 80  |
| 36  | 34  | 27  | 64  | 84  | 68  | 62  | 69  | 61  | 42  |
| 19  | 29  | 30  | 71  | 76  | 91  | 87  | 79  | 97  | 41  |
| 42  | 42  | 68  | 76  | 105 | 94  | 100 | 87  | 96  | 58  |
| 34  | 40  | 48  | 88  | 131 | 114 | 128 | 116 | 99  | 74  |
| 11  | 18  | 21  | 41  | 55  | 37  | 18  | 26  | 33  | 16  |
| 66  | 55  | 65  | 81  | 105 | 76  | 84  | 70  | 83  | 62  |
| 21  | 18  | 15  | 10  | 4   | 6   | 6   | 2   | 6   | 15  |
| 47  | 39  | 42  | 735 | 900 | 735 | 805 | 702 | 836 | 370 |
| 41  | 60  | 61  | 180 | 251 | 219 | 252 | 276 | 271 | 135 |
| 15  | 20  | 13  | 16  | 14  | 20  | 9   | 10  | 5   | 23  |
| 112 | 90  | 123 | 74  | 103 | 89  | 126 | 108 | 102 | 98  |
| 83  | 109 | 97  | 127 | 176 | 147 | 215 | 193 | 208 | 115 |
| 112 | 115 | 147 | 124 | 172 | 135 | 173 | 167 | 189 | 140 |
| 30  | 32  | 25  | 67  | 97  | 63  | 169 | 133 | 133 | 50  |
| 86  | 99  | 96  | 138 | 193 | 179 | 261 | 227 | 246 | 147 |
| 79  | 68  | 108 | 67  | 105 | 87  | 94  | 96  | 94  | 80  |
| 106 | 84  | 92  | 97  | 119 | 134 | 168 | 146 | 174 | 113 |
| 83  | 90  | 73  | 54  | 69  | 46  | 100 | 84  | 91  | 81  |
| 29  | 24  | 38  | 31  | 29  | 34  | 30  | 15  | 28  | 30  |
| 44  | 51  | 35  | 51  | 59  | 46  | 44  | 33  | 32  | 54  |
| 36  | 34  | 40  | 208 | 268 | 226 | 138 | 114 | 155 | 85  |
| 67  | 79  | 101 | 76  | 118 | 96  | 122 | 92  | 93  | 72  |
| 19  | 23  | 31  | 28  | 20  | 19  | 24  | 18  | 23  | 20  |
| 20  | 28  | 28  | 8   | 16  | 15  | 12  | 10  | 12  | 23  |
| 31  | 37  | 39  | 33  | 43  | 27  | 32  | 23  | 32  | 25  |
| 47  | 59  | 46  | 52  | 60  | 76  | 51  | 47  | 43  | 38  |
| 47  | 45  | 60  | 88  | 101 | 100 | 79  | 86  | 73  | 54  |
| 37  | 33  | 23  | 32  | 37  | 28  | 27  | 19  | 28  | 20  |
| 58  | 47  | 50  | 45  | 74  | 48  | 72  | 54  | 66  | 20  |

|    |    |    |     |     |     |     |     |     |     |
|----|----|----|-----|-----|-----|-----|-----|-----|-----|
| 61 | 61 | 46 | 50  | 80  | 64  | 63  | 57  | 58  | 49  |
| 24 | 21 | 24 | 70  | 96  | 78  | 90  | 73  | 77  | 39  |
| 87 | 81 | 80 | 85  | 122 | 90  | 113 | 106 | 109 | 100 |
| 45 | 32 | 60 | 124 | 151 | 125 | 89  | 93  | 97  | 52  |
| 25 | 28 | 25 | 132 | 130 | 121 | 101 | 81  | 100 | 49  |
| 76 | 69 | 65 | 97  | 133 | 110 | 82  | 62  | 70  | 39  |
| 64 | 51 | 90 | 96  | 108 | 99  | 81  | 67  | 75  | 64  |
| 36 | 47 | 50 | 116 | 139 | 128 | 179 | 139 | 144 | 75  |
| 20 | 33 | 38 | 59  | 116 | 87  | 58  | 64  | 68  | 42  |
| 24 | 34 | 37 | 41  | 63  | 59  | 51  | 37  | 49  | 28  |
| 18 | 17 | 12 | 20  | 18  | 29  | 27  | 26  | 23  | 22  |
| 23 | 26 | 32 | 28  | 24  | 22  | 29  | 13  | 37  | 23  |
| 49 | 52 | 54 | 99  | 129 | 128 | 143 | 135 | 142 | 67  |
| 29 | 29 | 23 | 62  | 76  | 64  | 56  | 49  | 52  | 40  |
| 47 | 48 | 45 | 40  | 48  | 37  | 50  | 40  | 44  | 37  |
| 42 | 41 | 55 | 61  | 80  | 56  | 72  | 55  | 63  | 39  |
| 14 | 24 | 18 | 35  | 41  | 20  | 23  | 17  | 29  | 14  |
| 19 | 16 | 20 | 98  | 112 | 88  | 89  | 71  | 91  | 30  |
| 28 | 29 | 34 | 175 | 235 | 198 | 184 | 133 | 160 | 49  |
| 9  | 19 | 23 | 10  | 7   | 13  | 17  | 16  | 11  | 19  |
| 67 | 58 | 71 | 81  | 87  | 90  | 107 | 111 | 112 | 65  |
| 28 | 34 | 41 | 34  | 40  | 44  | 42  | 27  | 39  | 38  |
| 85 | 86 | 66 | 104 | 163 | 152 | 187 | 193 | 206 | 107 |
| 40 | 43 | 27 | 160 | 194 | 154 | 157 | 156 | 163 | 66  |
| 38 | 38 | 33 | 46  | 48  | 51  | 63  | 65  | 63  | 62  |
| 26 | 16 | 21 | 39  | 44  | 43  | 45  | 36  | 46  | 26  |
| 63 | 60 | 47 | 36  | 40  | 35  | 70  | 79  | 75  | 53  |
| 20 | 34 | 41 | 90  | 117 | 93  | 139 | 99  | 119 | 67  |
| 38 | 32 | 31 | 43  | 52  | 55  | 62  | 53  | 51  | 36  |
| 28 | 20 | 21 | 81  | 131 | 110 | 130 | 123 | 127 | 55  |
| 30 | 24 | 35 | 63  | 69  | 56  | 55  | 32  | 47  | 32  |
| 41 | 35 | 47 | 59  | 69  | 52  | 71  | 79  | 67  | 55  |
| 79 | 60 | 84 | 58  | 65  | 58  | 53  | 56  | 48  | 49  |
| 45 | 35 | 38 | 125 | 143 | 115 | 102 | 109 | 109 | 60  |
| 47 | 31 | 48 | 184 | 223 | 201 | 155 | 125 | 138 | 61  |
| 23 | 33 | 28 | 84  | 76  | 95  | 70  | 65  | 80  | 39  |
| 37 | 44 | 45 | 47  | 62  | 55  | 43  | 38  | 52  | 45  |
| 35 | 36 | 27 | 25  | 43  | 28  | 36  | 31  | 29  | 24  |
| 58 | 57 | 55 | 73  | 134 | 91  | 78  | 81  | 76  | 48  |
| 38 | 42 | 60 | 68  | 99  | 66  | 81  | 69  | 95  | 37  |
| 76 | 74 | 59 | 91  | 130 | 99  | 96  | 97  | 101 | 76  |

|    |     |     |     |     |     |     |     |     |     |
|----|-----|-----|-----|-----|-----|-----|-----|-----|-----|
| 49 | 55  | 48  | 57  | 64  | 60  | 47  | 52  | 60  | 41  |
| 66 | 75  | 74  | 62  | 89  | 78  | 40  | 66  | 52  | 45  |
| 41 | 53  | 63  | 66  | 68  | 59  | 49  | 48  | 57  | 38  |
| 91 | 97  | 82  | 100 | 146 | 124 | 93  | 99  | 100 | 60  |
| 46 | 36  | 38  | 83  | 97  | 98  | 78  | 71  | 96  | 45  |
| 62 | 62  | 71  | 104 | 112 | 99  | 82  | 64  | 82  | 48  |
| 20 | 18  | 26  | 20  | 18  | 26  | 28  | 29  | 20  | 15  |
| 5  | 11  | 9   | 15  | 15  | 19  | 25  | 8   | 14  | 15  |
| 21 | 21  | 30  | 35  | 44  | 45  | 40  | 36  | 36  | 28  |
| 5  | 1   | 7   | 8   | 13  | 2   | 12  | 2   | 10  | 6   |
| 7  | 3   | 7   | 1   | 7   | 3   | 7   | 1   | 4   | 1   |
| 6  | 8   | 5   | 19  | 20  | 19  | 19  | 16  | 12  | 10  |
| 4  | 2   | 8   | 19  | 15  | 6   | 16  | 12  | 14  | 9   |
| 19 | 34  | 22  | 32  | 38  | 29  | 52  | 34  | 30  | 35  |
| 32 | 21  | 25  | 44  | 38  | 41  | 39  | 41  | 54  | 23  |
| 31 | 38  | 44  | 40  | 46  | 45  | 51  | 54  | 61  | 52  |
| 62 | 56  | 58  | 83  | 80  | 77  | 94  | 67  | 77  | 53  |
| 34 | 38  | 37  | 53  | 77  | 56  | 51  | 45  | 47  | 41  |
| 33 | 42  | 46  | 57  | 69  | 65  | 53  | 40  | 44  | 28  |
| 44 | 37  | 48  | 27  | 48  | 38  | 32  | 36  | 41  | 46  |
| 74 | 68  | 99  | 177 | 223 | 186 | 207 | 173 | 184 | 127 |
| 38 | 35  | 35  | 77  | 93  | 96  | 91  | 85  | 68  | 39  |
| 21 | 28  | 17  | 58  | 48  | 45  | 27  | 42  | 36  | 13  |
| 48 | 35  | 48  | 131 | 158 | 126 | 130 | 128 | 121 | 58  |
| 69 | 80  | 78  | 68  | 64  | 66  | 87  | 71  | 93  | 74  |
| 18 | 18  | 26  | 32  | 32  | 34  | 19  | 26  | 36  | 23  |
| 28 | 29  | 31  | 43  | 46  | 51  | 54  | 50  | 49  | 33  |
| 26 | 27  | 30  | 41  | 49  | 44  | 40  | 43  | 62  | 35  |
| 17 | 24  | 27  | 49  | 44  | 48  | 49  | 37  | 45  | 39  |
| 7  | 3   | 3   | 2   | 2   | 4   | 4   | 2   | 5   | 6   |
| 98 | 117 | 114 | 95  | 135 | 101 | 139 | 134 | 144 | 91  |
| 31 | 46  | 57  | 44  | 57  | 47  | 59  | 51  | 71  | 47  |
| 71 | 71  | 76  | 143 | 204 | 159 | 212 | 196 | 208 | 114 |
| 5  | 6   | 5   | 12  | 20  | 21  | 24  | 16  | 17  | 10  |
| 56 | 56  | 67  | 82  | 105 | 86  | 107 | 88  | 114 | 52  |
| 33 | 35  | 43  | 23  | 43  | 30  | 35  | 27  | 31  | 19  |
| 41 | 38  | 45  | 67  | 68  | 59  | 66  | 53  | 68  | 38  |
| 16 | 14  | 19  | 23  | 37  | 36  | 39  | 30  | 33  | 18  |
| 34 | 32  | 36  | 49  | 50  | 45  | 54  | 52  | 51  | 27  |
| 22 | 10  | 15  | 25  | 53  | 35  | 24  | 28  | 25  | 19  |
| 29 | 38  | 32  | 44  | 49  | 33  | 38  | 38  | 42  | 37  |

|     |     |     |     |     |     |     |     |     |     |
|-----|-----|-----|-----|-----|-----|-----|-----|-----|-----|
| 51  | 54  | 47  | 44  | 42  | 42  | 38  | 40  | 45  | 44  |
| 23  | 28  | 43  | 180 | 202 | 193 | 137 | 123 | 164 | 54  |
| 45  | 33  | 38  | 167 | 209 | 193 | 167 | 160 | 179 | 80  |
| 32  | 38  | 36  | 135 | 168 | 130 | 101 | 81  | 101 | 51  |
| 18  | 19  | 20  | 103 | 115 | 107 | 89  | 88  | 89  | 24  |
| 58  | 50  | 73  | 135 | 179 | 105 | 129 | 117 | 130 | 59  |
| 19  | 14  | 22  | 101 | 152 | 100 | 53  | 47  | 73  | 17  |
| 27  | 27  | 32  | 48  | 56  | 39  | 45  | 42  | 53  | 41  |
| 22  | 32  | 28  | 40  | 50  | 46  | 32  | 31  | 27  | 40  |
| 41  | 58  | 66  | 68  | 83  | 60  | 70  | 74  | 70  | 44  |
| 83  | 89  | 95  | 138 | 156 | 137 | 182 | 156 | 154 | 107 |
| 110 | 128 | 138 | 194 | 263 | 202 | 311 | 294 | 337 | 157 |
| 88  | 86  | 83  | 107 | 171 | 130 | 129 | 130 | 126 | 108 |
| 33  | 37  | 31  | 14  | 20  | 21  | 24  | 32  | 25  | 31  |
| 82  | 71  | 95  | 287 | 405 | 360 | 614 | 528 | 550 | 268 |
| 41  | 57  | 65  | 152 | 181 | 165 | 266 | 234 | 256 | 107 |
| 41  | 56  | 46  | 105 | 125 | 116 | 90  | 49  | 105 | 57  |
| 33  | 23  | 30  | 50  | 81  | 72  | 75  | 63  | 67  | 29  |
| 57  | 46  | 63  | 121 | 159 | 133 | 107 | 95  | 116 | 62  |
| 27  | 11  | 28  | 39  | 49  | 38  | 44  | 37  | 48  | 28  |
| 82  | 89  | 109 | 114 | 142 | 104 | 144 | 117 | 131 | 68  |
| 46  | 55  | 51  | 64  | 79  | 62  | 71  | 60  | 62  | 48  |
| 20  | 25  | 29  | 73  | 88  | 52  | 41  | 36  | 39  | 17  |
| 4   | 9   | 5   | 18  | 7   | 10  | 6   | 3   | 13  | 6   |
| 62  | 66  | 64  | 92  | 103 | 93  | 60  | 52  | 72  | 45  |
| 56  | 60  | 48  | 78  | 128 | 93  | 72  | 69  | 79  | 56  |
| 47  | 65  | 34  | 104 | 113 | 86  | 80  | 84  | 81  | 63  |
| 24  | 30  | 44  | 42  | 48  | 48  | 38  | 46  | 48  | 36  |
| 31  | 22  | 30  | 31  | 37  | 37  | 55  | 51  | 51  | 28  |
| 25  | 31  | 19  | 24  | 21  | 21  | 35  | 29  | 42  | 18  |
| 64  | 69  | 73  | 258 | 329 | 266 | 272 | 251 | 309 | 121 |
| 55  | 33  | 42  | 23  | 39  | 39  | 28  | 31  | 37  | 21  |
| 42  | 55  | 55  | 25  | 33  | 27  | 42  | 31  | 40  | 28  |
| 68  | 47  | 49  | 98  | 102 | 87  | 80  | 108 | 94  | 63  |
| 20  | 33  | 24  | 38  | 40  | 49  | 44  | 47  | 43  | 25  |
| 51  | 53  | 50  | 89  | 121 | 85  | 84  | 69  | 83  | 49  |
| 58  | 56  | 42  | 380 | 539 | 375 | 482 | 434 | 492 | 178 |
| 39  | 33  | 34  | 30  | 25  | 22  | 36  | 29  | 43  | 32  |
| 52  | 47  | 51  | 73  | 124 | 70  | 86  | 57  | 87  | 37  |
| 24  | 20  | 26  | 96  | 116 | 98  | 80  | 68  | 74  | 41  |
| 33  | 25  | 30  | 61  | 80  | 47  | 61  | 51  | 48  | 37  |



|    |    |    |     |     |     |     |     |     |     |
|----|----|----|-----|-----|-----|-----|-----|-----|-----|
| 68 | 68 | 78 | 123 | 173 | 160 | 183 | 186 | 187 | 105 |
| 13 | 19 | 14 | 71  | 93  | 59  | 52  | 53  | 51  | 24  |
| 65 | 73 | 63 | 283 | 332 | 365 | 443 | 428 | 465 | 182 |
| 36 | 30 | 41 | 89  | 116 | 73  | 106 | 87  | 79  | 41  |
| 43 | 46 | 59 | 124 | 138 | 104 | 160 | 158 | 180 | 77  |
| 46 | 33 | 31 | 113 | 167 | 123 | 105 | 93  | 96  | 44  |
| 23 | 23 | 29 | 76  | 109 | 96  | 66  | 71  | 75  | 30  |
| 50 | 53 | 53 | 61  | 72  | 47  | 76  | 64  | 69  | 52  |
| 23 | 27 | 36 | 27  | 27  | 31  | 34  | 25  | 20  | 25  |
| 32 | 31 | 31 | 8   | 12  | 17  | 7   | 9   | 17  | 14  |
| 34 | 30 | 36 | 44  | 50  | 52  | 43  | 31  | 31  | 28  |
| 35 | 40 | 41 | 26  | 44  | 36  | 58  | 66  | 46  | 28  |
| 16 | 11 | 14 | 11  | 10  | 13  | 9   | 10  | 14  | 9   |
| 30 | 25 | 30 | 36  | 28  | 37  | 25  | 16  | 18  | 16  |
| 37 | 28 | 30 | 43  | 46  | 50  | 42  | 38  | 44  | 41  |
| 63 | 56 | 54 | 77  | 74  | 102 | 61  | 57  | 53  | 53  |
| 43 | 36 | 42 | 80  | 91  | 88  | 59  | 68  | 77  | 45  |
| 55 | 78 | 68 | 103 | 136 | 122 | 85  | 86  | 80  | 73  |
| 31 | 48 | 38 | 42  | 61  | 51  | 73  | 71  | 80  | 54  |
| 30 | 56 | 38 | 162 | 190 | 157 | 183 | 165 | 192 | 75  |
| 21 | 29 | 25 | 101 | 109 | 85  | 83  | 76  | 96  | 52  |
| 63 | 55 | 56 | 217 | 251 | 209 | 212 | 175 | 214 | 76  |
| 31 | 23 | 38 | 60  | 59  | 51  | 41  | 31  | 44  | 19  |
| 21 | 34 | 31 | 52  | 76  | 78  | 61  | 43  | 48  | 33  |
| 52 | 60 | 61 | 30  | 52  | 44  | 43  | 31  | 48  | 27  |
| 70 | 54 | 68 | 79  | 66  | 89  | 32  | 53  | 48  | 52  |
| 44 | 39 | 53 | 37  | 50  | 41  | 41  | 49  | 42  | 43  |
| 15 | 22 | 22 | 101 | 133 | 107 | 128 | 112 | 119 | 53  |
| 36 | 49 | 51 | 46  | 52  | 45  | 44  | 42  | 39  | 41  |
| 39 | 42 | 40 | 57  | 77  | 54  | 48  | 49  | 43  | 43  |
| 24 | 20 | 19 | 41  | 68  | 68  | 53  | 48  | 52  | 40  |
| 39 | 39 | 52 | 101 | 137 | 109 | 123 | 115 | 125 | 61  |
| 44 | 50 | 63 | 87  | 105 | 99  | 112 | 118 | 115 | 56  |
| 51 | 41 | 36 | 65  | 66  | 62  | 60  | 66  | 62  | 56  |
| 52 | 55 | 81 | 55  | 70  | 58  | 74  | 72  | 62  | 52  |
| 36 | 21 | 29 | 37  | 48  | 38  | 41  | 51  | 48  | 31  |
| 53 | 61 | 73 | 83  | 94  | 99  | 95  | 65  | 73  | 80  |
| 71 | 45 | 51 | 110 | 149 | 97  | 129 | 121 | 133 | 75  |
| 66 | 42 | 48 | 72  | 74  | 89  | 77  | 97  | 76  | 49  |
| 40 | 40 | 50 | 75  | 92  | 69  | 110 | 83  | 88  | 53  |
| 55 | 40 | 58 | 31  | 51  | 46  | 77  | 68  | 79  | 55  |

|     |     |     |     |     |     |     |     |     |     |
|-----|-----|-----|-----|-----|-----|-----|-----|-----|-----|
| 11  | 7   | 15  | 10  | 9   | 16  | 15  | 15  | 15  | 10  |
| 20  | 16  | 19  | 19  | 27  | 21  | 44  | 45  | 48  | 24  |
| 12  | 17  | 15  | 6   | 10  | 11  | 10  | 16  | 17  | 19  |
| 35  | 35  | 39  | 31  | 33  | 30  | 44  | 22  | 29  | 31  |
| 24  | 13  | 22  | 43  | 53  | 52  | 66  | 55  | 72  | 34  |
| 54  | 61  | 69  | 86  | 125 | 97  | 134 | 125 | 132 | 61  |
| 43  | 63  | 50  | 126 | 152 | 131 | 152 | 132 | 132 | 67  |
| 90  | 94  | 102 | 114 | 157 | 134 | 142 | 178 | 187 | 98  |
| 10  | 7   | 17  | 42  | 50  | 46  | 24  | 20  | 26  | 11  |
| 156 | 143 | 157 | 74  | 99  | 76  | 94  | 113 | 109 | 134 |
| 48  | 44  | 60  | 90  | 126 | 114 | 81  | 58  | 69  | 44  |
| 172 | 182 | 198 | 86  | 133 | 80  | 139 | 126 | 137 | 133 |
| 67  | 44  | 75  | 134 | 130 | 127 | 99  | 122 | 107 | 74  |
| 15  | 21  | 23  | 34  | 60  | 47  | 23  | 24  | 30  | 18  |
| 36  | 22  | 32  | 64  | 76  | 64  | 42  | 54  | 53  | 36  |
| 68  | 66  | 73  | 83  | 123 | 114 | 106 | 77  | 102 | 68  |
| 38  | 42  | 43  | 42  | 71  | 63  | 64  | 69  | 71  | 31  |
| 52  | 41  | 27  | 35  | 55  | 50  | 42  | 38  | 42  | 31  |
| 43  | 55  | 68  | 57  | 75  | 59  | 64  | 68  | 44  | 48  |
| 43  | 44  | 51  | 96  | 95  | 93  | 101 | 87  | 93  | 47  |
| 37  | 39  | 41  | 70  | 87  | 55  | 61  | 43  | 41  | 36  |
| 23  | 24  | 16  | 39  | 43  | 38  | 38  | 36  | 48  | 20  |
| 45  | 31  | 55  | 34  | 47  | 31  | 57  | 72  | 56  | 60  |
| 47  | 60  | 59  | 66  | 87  | 69  | 96  | 86  | 77  | 70  |
| 39  | 44  | 43  | 58  | 122 | 102 | 150 | 111 | 154 | 61  |
| 42  | 49  | 63  | 66  | 88  | 80  | 67  | 58  | 74  | 49  |
| 73  | 81  | 74  | 134 | 200 | 152 | 219 | 197 | 230 | 115 |
| 15  | 16  | 13  | 33  | 57  | 52  | 68  | 62  | 69  | 24  |
| 23  | 25  | 30  | 58  | 92  | 73  | 152 | 119 | 119 | 51  |
| 76  | 64  | 63  | 367 | 430 | 372 | 487 | 411 | 428 | 174 |
| 16  | 26  | 37  | 245 | 301 | 279 | 239 | 176 | 259 | 92  |
| 56  | 46  | 66  | 267 | 399 | 306 | 322 | 247 | 268 | 108 |
| 27  | 33  | 41  | 78  | 71  | 84  | 118 | 108 | 136 | 46  |
| 41  | 39  | 50  | 79  | 121 | 87  | 165 | 152 | 153 | 62  |
| 23  | 28  | 39  | 132 | 171 | 137 | 173 | 143 | 155 | 75  |
| 8   | 11  | 17  | 12  | 12  | 8   | 36  | 37  | 34  | 20  |
| 33  | 33  | 36  | 65  | 79  | 84  | 92  | 83  | 95  | 41  |
| 45  | 41  | 59  | 70  | 119 | 86  | 131 | 93  | 119 | 59  |
| 21  | 38  | 33  | 29  | 44  | 41  | 52  | 45  | 69  | 31  |
| 31  | 40  | 40  | 42  | 60  | 58  | 61  | 61  | 73  | 44  |
| 58  | 54  | 36  | 99  | 115 | 121 | 132 | 93  | 107 | 52  |

|     |     |     |     |     |     |     |     |     |     |
|-----|-----|-----|-----|-----|-----|-----|-----|-----|-----|
| 59  | 51  | 59  | 81  | 109 | 108 | 66  | 62  | 81  | 48  |
| 31  | 39  | 49  | 52  | 64  | 54  | 63  | 52  | 42  | 45  |
| 43  | 51  | 65  | 38  | 50  | 46  | 49  | 46  | 46  | 34  |
| 48  | 58  | 57  | 56  | 64  | 64  | 72  | 74  | 61  | 59  |
| 26  | 37  | 37  | 31  | 38  | 57  | 37  | 47  | 48  | 46  |
| 40  | 45  | 52  | 17  | 25  | 27  | 16  | 25  | 33  | 27  |
| 55  | 47  | 50  | 52  | 59  | 48  | 66  | 58  | 68  | 50  |
| 36  | 42  | 63  | 37  | 38  | 32  | 47  | 47  | 56  | 37  |
| 30  | 35  | 45  | 75  | 88  | 95  | 87  | 79  | 102 | 57  |
| 42  | 37  | 39  | 217 | 295 | 196 | 334 | 260 | 303 | 104 |
| 7   | 15  | 13  | 31  | 43  | 27  | 42  | 28  | 28  | 16  |
| 8   | 12  | 12  | 29  | 52  | 41  | 51  | 37  | 55  | 24  |
| 79  | 101 | 85  | 171 | 195 | 169 | 213 | 184 | 207 | 85  |
| 63  | 71  | 83  | 116 | 157 | 115 | 162 | 145 | 160 | 90  |
| 77  | 56  | 59  | 105 | 148 | 112 | 133 | 107 | 122 | 74  |
| 64  | 36  | 46  | 109 | 126 | 96  | 107 | 111 | 107 | 54  |
| 94  | 99  | 113 | 155 | 197 | 165 | 181 | 186 | 175 | 100 |
| 90  | 63  | 58  | 99  | 113 | 102 | 80  | 76  | 77  | 52  |
| 22  | 27  | 33  | 93  | 143 | 121 | 105 | 89  | 90  | 45  |
| 108 | 119 | 117 | 114 | 132 | 132 | 152 | 103 | 143 | 81  |
| 40  | 35  | 32  | 84  | 71  | 84  | 54  | 55  | 53  | 21  |
| 71  | 52  | 54  | 51  | 78  | 60  | 44  | 56  | 43  | 37  |
| 48  | 65  | 61  | 103 | 155 | 114 | 172 | 162 | 189 | 97  |
| 27  | 39  | 46  | 51  | 81  | 65  | 38  | 63  | 41  | 34  |
| 14  | 18  | 15  | 10  | 11  | 12  | 14  | 5   | 10  | 14  |
| 32  | 33  | 29  | 59  | 78  | 61  | 83  | 95  | 68  | 45  |
| 61  | 70  | 57  | 157 | 220 | 199 | 170 | 179 | 155 | 92  |
| 44  | 47  | 46  | 86  | 121 | 110 | 103 | 89  | 111 | 46  |
| 17  | 12  | 13  | 24  | 42  | 31  | 40  | 30  | 40  | 13  |
| 9   | 8   | 18  | 26  | 26  | 27  | 28  | 24  | 24  | 16  |
| 50  | 29  | 50  | 138 | 179 | 175 | 139 | 111 | 121 | 71  |
| 27  | 23  | 34  | 56  | 79  | 66  | 67  | 43  | 54  | 33  |
| 29  | 18  | 25  | 77  | 101 | 86  | 63  | 48  | 68  | 38  |
| 44  | 60  | 41  | 37  | 38  | 48  | 46  | 59  | 59  | 21  |
| 40  | 50  | 35  | 24  | 41  | 38  | 50  | 35  | 49  | 37  |
| 138 | 136 | 155 | 110 | 149 | 134 | 150 | 134 | 153 | 92  |
| 85  | 79  | 91  | 84  | 107 | 116 | 150 | 131 | 120 | 61  |
| 94  | 107 | 109 | 79  | 72  | 75  | 82  | 94  | 86  | 67  |
| 95  | 112 | 104 | 165 | 218 | 205 | 207 | 181 | 201 | 98  |
| 92  | 66  | 84  | 72  | 119 | 96  | 122 | 84  | 102 | 65  |
| 64  | 84  | 71  | 162 | 167 | 157 | 234 | 173 | 229 | 99  |

|    |    |     |     |     |     |     |     |     |     |
|----|----|-----|-----|-----|-----|-----|-----|-----|-----|
| 60 | 81 | 73  | 138 | 175 | 156 | 150 | 114 | 144 | 60  |
| 40 | 47 | 65  | 70  | 84  | 73  | 82  | 75  | 62  | 51  |
| 54 | 64 | 58  | 282 | 410 | 352 | 443 | 370 | 416 | 197 |
| 14 | 19 | 25  | 105 | 142 | 107 | 111 | 88  | 88  | 41  |
| 65 | 50 | 71  | 270 | 315 | 312 | 319 | 282 | 309 | 129 |
| 17 | 13 | 6   | 54  | 65  | 34  | 52  | 38  | 41  | 32  |
| 62 | 50 | 59  | 143 | 223 | 185 | 220 | 196 | 188 | 105 |
| 24 | 32 | 32  | 92  | 123 | 83  | 68  | 60  | 69  | 29  |
| 21 | 19 | 32  | 48  | 55  | 52  | 32  | 38  | 58  | 32  |
| 53 | 53 | 56  | 302 | 345 | 328 | 317 | 251 | 305 | 122 |
| 15 | 27 | 28  | 32  | 49  | 41  | 23  | 31  | 34  | 24  |
| 11 | 14 | 12  | 41  | 46  | 68  | 48  | 56  | 57  | 22  |
| 31 | 21 | 34  | 42  | 59  | 48  | 45  | 40  | 51  | 33  |
| 67 | 80 | 80  | 74  | 145 | 114 | 107 | 72  | 93  | 53  |
| 82 | 83 | 109 | 119 | 143 | 121 | 213 | 196 | 234 | 127 |
| 36 | 26 | 38  | 231 | 286 | 212 | 159 | 138 | 190 | 81  |
| 41 | 33 | 26  | 65  | 63  | 67  | 58  | 63  | 89  | 37  |
| 16 | 27 | 19  | 30  | 30  | 35  | 36  | 45  | 43  | 15  |
| 29 | 30 | 29  | 120 | 160 | 134 | 140 | 132 | 127 | 67  |
| 62 | 69 | 85  | 181 | 183 | 192 | 244 | 234 | 262 | 107 |
| 26 | 37 | 32  | 103 | 133 | 113 | 115 | 87  | 113 | 46  |
| 47 | 60 | 64  | 71  | 93  | 77  | 87  | 70  | 90  | 52  |
| 56 | 57 | 65  | 99  | 132 | 101 | 122 | 110 | 140 | 67  |
| 32 | 34 | 43  | 53  | 54  | 40  | 33  | 45  | 45  | 30  |
| 88 | 83 | 96  | 106 | 170 | 119 | 163 | 166 | 134 | 82  |
| 59 | 67 | 94  | 109 | 159 | 135 | 135 | 109 | 138 | 68  |
| 41 | 39 | 47  | 93  | 117 | 80  | 76  | 74  | 81  | 44  |
| 36 | 34 | 52  | 60  | 71  | 77  | 56  | 37  | 48  | 41  |
| 28 | 14 | 24  | 22  | 38  | 29  | 25  | 27  | 24  | 17  |
| 37 | 36 | 51  | 73  | 70  | 60  | 67  | 48  | 57  | 26  |
| 37 | 27 | 32  | 58  | 57  | 50  | 50  | 48  | 56  | 34  |
| 26 | 24 | 17  | 20  | 16  | 27  | 21  | 19  | 20  | 20  |
| 42 | 34 | 47  | 41  | 33  | 38  | 51  | 44  | 40  | 29  |
| 41 | 31 | 30  | 49  | 71  | 66  | 57  | 60  | 45  | 41  |
| 52 | 41 | 44  | 213 | 311 | 226 | 292 | 202 | 242 | 114 |
| 24 | 17 | 27  | 66  | 84  | 81  | 56  | 53  | 56  | 28  |
| 32 | 32 | 38  | 87  | 91  | 98  | 79  | 72  | 88  | 47  |
| 45 | 45 | 51  | 38  | 70  | 57  | 31  | 44  | 52  | 50  |
| 44 | 60 | 57  | 65  | 67  | 56  | 67  | 45  | 53  | 27  |
| 48 | 41 | 48  | 81  | 67  | 61  | 78  | 59  | 64  | 30  |
| 77 | 64 | 85  | 113 | 146 | 149 | 169 | 168 | 179 | 106 |

|     |     |     |     |     |     |     |     |     |     |
|-----|-----|-----|-----|-----|-----|-----|-----|-----|-----|
| 45  | 51  | 70  | 79  | 120 | 95  | 79  | 80  | 94  | 54  |
| 12  | 27  | 36  | 65  | 84  | 60  | 53  | 39  | 55  | 25  |
| 47  | 73  | 50  | 143 | 172 | 160 | 159 | 158 | 186 | 87  |
| 58  | 48  | 56  | 168 | 190 | 141 | 109 | 115 | 125 | 75  |
| 33  | 26  | 36  | 30  | 42  | 39  | 37  | 34  | 41  | 31  |
| 69  | 92  | 68  | 194 | 231 | 212 | 369 | 336 | 364 | 177 |
| 36  | 44  | 43  | 99  | 134 | 106 | 149 | 148 | 147 | 63  |
| 15  | 21  | 29  | 71  | 75  | 69  | 74  | 72  | 78  | 35  |
| 47  | 48  | 60  | 105 | 136 | 113 | 137 | 104 | 129 | 80  |
| 17  | 35  | 28  | 68  | 97  | 58  | 65  | 57  | 58  | 45  |
| 48  | 33  | 42  | 160 | 201 | 168 | 175 | 155 | 151 | 77  |
| 57  | 57  | 49  | 141 | 189 | 185 | 201 | 178 | 206 | 106 |
| 44  | 46  | 40  | 90  | 130 | 115 | 139 | 120 | 136 | 60  |
| 45  | 39  | 68  | 118 | 153 | 108 | 146 | 120 | 146 | 98  |
| 71  | 64  | 75  | 85  | 108 | 93  | 145 | 123 | 146 | 87  |
| 48  | 56  | 66  | 100 | 131 | 122 | 118 | 104 | 126 | 57  |
| 38  | 45  | 52  | 170 | 219 | 202 | 266 | 224 | 266 | 125 |
| 66  | 65  | 59  | 138 | 175 | 165 | 200 | 144 | 166 | 94  |
| 37  | 40  | 38  | 66  | 73  | 71  | 85  | 67  | 57  | 36  |
| 102 | 93  | 127 | 176 | 220 | 200 | 236 | 197 | 256 | 134 |
| 41  | 31  | 53  | 47  | 61  | 42  | 46  | 51  | 45  | 42  |
| 39  | 34  | 49  | 64  | 84  | 91  | 97  | 87  | 102 | 53  |
| 114 | 101 | 124 | 119 | 136 | 126 | 220 | 206 | 161 | 138 |
| 35  | 36  | 54  | 64  | 89  | 77  | 91  | 77  | 86  | 54  |
| 63  | 60  | 62  | 89  | 118 | 108 | 79  | 75  | 98  | 60  |
| 61  | 55  | 67  | 117 | 126 | 101 | 78  | 66  | 76  | 58  |
| 40  | 33  | 46  | 62  | 101 | 70  | 68  | 67  | 79  | 56  |
| 48  | 46  | 47  | 49  | 68  | 63  | 78  | 57  | 66  | 41  |
| 39  | 38  | 56  | 189 | 260 | 233 | 292 | 243 | 281 | 135 |
| 63  | 63  | 61  | 260 | 300 | 324 | 223 | 224 | 218 | 124 |
| 36  | 49  | 38  | 255 | 329 | 275 | 303 | 278 | 270 | 141 |
| 25  | 15  | 14  | 42  | 47  | 39  | 37  | 33  | 38  | 16  |
| 67  | 49  | 65  | 130 | 168 | 151 | 190 | 201 | 210 | 110 |
| 67  | 63  | 49  | 68  | 95  | 102 | 126 | 158 | 157 | 70  |
| 49  | 34  | 58  | 109 | 126 | 99  | 113 | 102 | 101 | 64  |
| 38  | 41  | 60  | 197 | 223 | 209 | 211 | 205 | 237 | 100 |
| 32  | 21  | 42  | 126 | 164 | 134 | 107 | 107 | 120 | 60  |
| 37  | 38  | 39  | 150 | 185 | 170 | 152 | 137 | 143 | 88  |
| 14  | 16  | 13  | 32  | 47  | 49  | 49  | 52  | 60  | 26  |
| 68  | 59  | 58  | 61  | 91  | 72  | 74  | 84  | 79  | 56  |
| 103 | 87  | 89  | 91  | 136 | 117 | 107 | 78  | 88  | 70  |

|    |     |    |     |     |     |     |     |     |     |
|----|-----|----|-----|-----|-----|-----|-----|-----|-----|
| 56 | 55  | 47 | 36  | 58  | 53  | 53  | 51  | 56  | 38  |
| 29 | 31  | 31 | 42  | 57  | 58  | 59  | 53  | 50  | 31  |
| 27 | 20  | 33 | 164 | 216 | 161 | 178 | 126 | 147 | 58  |
| 34 | 48  | 45 | 118 | 141 | 121 | 156 | 120 | 162 | 73  |
| 60 | 76  | 71 | 163 | 209 | 172 | 223 | 188 | 194 | 124 |
| 46 | 51  | 52 | 114 | 116 | 100 | 126 | 91  | 104 | 67  |
| 78 | 70  | 57 | 131 | 201 | 180 | 147 | 151 | 155 | 84  |
| 40 | 36  | 44 | 106 | 119 | 83  | 124 | 88  | 109 | 44  |
| 52 | 53  | 54 | 174 | 155 | 155 | 197 | 188 | 188 | 99  |
| 12 | 14  | 13 | 6   | 16  | 15  | 20  | 13  | 18  | 12  |
| 17 | 21  | 30 | 25  | 36  | 20  | 27  | 23  | 18  | 20  |
| 32 | 18  | 30 | 53  | 62  | 62  | 94  | 80  | 102 | 44  |
| 49 | 44  | 53 | 188 | 229 | 165 | 190 | 166 | 176 | 61  |
| 7  | 10  | 3  | 9   | 15  | 6   | 7   | 10  | 11  | 7   |
| 31 | 28  | 44 | 98  | 110 | 84  | 159 | 158 | 147 | 59  |
| 21 | 17  | 18 | 11  | 14  | 7   | 33  | 33  | 23  | 18  |
| 29 | 18  | 21 | 56  | 62  | 61  | 39  | 43  | 51  | 30  |
| 48 | 41  | 46 | 88  | 110 | 84  | 74  | 70  | 85  | 37  |
| 18 | 26  | 21 | 74  | 93  | 61  | 61  | 60  | 64  | 32  |
| 39 | 26  | 29 | 84  | 99  | 86  | 95  | 78  | 90  | 58  |
| 94 | 102 | 85 | 162 | 165 | 147 | 300 | 308 | 292 | 153 |
| 24 | 29  | 24 | 92  | 110 | 121 | 106 | 86  | 106 | 39  |
| 34 | 41  | 46 | 91  | 127 | 100 | 119 | 103 | 123 | 54  |
| 42 | 60  | 58 | 123 | 141 | 145 | 222 | 237 | 260 | 119 |
| 44 | 45  | 56 | 176 | 221 | 206 | 222 | 200 | 233 | 84  |
| 61 | 70  | 63 | 290 | 371 | 323 | 281 | 248 | 265 | 129 |
| 26 | 46  | 38 | 125 | 145 | 164 | 128 | 107 | 129 | 56  |
| 43 | 38  | 39 | 152 | 170 | 160 | 147 | 144 | 144 | 69  |
| 19 | 21  | 22 | 116 | 131 | 118 | 75  | 92  | 93  | 29  |
| 23 | 7   | 18 | 33  | 40  | 49  | 39  | 38  | 43  | 24  |
| 21 | 26  | 24 | 60  | 70  | 74  | 64  | 59  | 59  | 42  |
| 22 | 22  | 25 | 52  | 52  | 63  | 55  | 55  | 56  | 28  |
| 47 | 48  | 50 | 63  | 94  | 84  | 73  | 63  | 68  | 45  |
| 13 | 8   | 8  | 87  | 139 | 97  | 114 | 75  | 88  | 35  |
| 27 | 24  | 34 | 83  | 104 | 96  | 89  | 75  | 78  | 29  |
| 11 | 8   | 11 | 14  | 17  | 14  | 14  | 9   | 11  | 8   |
| 7  | 7   | 9  | 15  | 13  | 13  | 16  | 8   | 14  | 6   |
| 16 | 20  | 24 | 22  | 26  | 20  | 23  | 15  | 24  | 15  |
| 36 | 33  | 36 | 56  | 72  | 59  | 52  | 51  | 57  | 29  |
| 7  | 8   | 8  | 38  | 48  | 29  | 12  | 20  | 14  | 8   |
| 18 | 19  | 25 | 70  | 79  | 78  | 82  | 99  | 86  | 49  |

|    |    |    |     |     |     |     |     |     |     |
|----|----|----|-----|-----|-----|-----|-----|-----|-----|
| 39 | 41 | 29 | 92  | 106 | 119 | 128 | 108 | 119 | 55  |
| 50 | 63 | 46 | 105 | 124 | 98  | 104 | 99  | 95  | 53  |
| 72 | 71 | 60 | 119 | 136 | 142 | 146 | 134 | 154 | 72  |
| 29 | 35 | 46 | 78  | 80  | 81  | 55  | 80  | 78  | 39  |
| 10 | 7  | 11 | 5   | 0   | 5   | 6   | 7   | 6   | 11  |
| 66 | 60 | 61 | 67  | 112 | 90  | 92  | 88  | 103 | 64  |
| 42 | 41 | 38 | 83  | 104 | 90  | 126 | 123 | 129 | 64  |
| 49 | 51 | 51 | 124 | 125 | 134 | 80  | 75  | 67  | 60  |
| 3  | 4  | 8  | 23  | 27  | 16  | 8   | 5   | 8   | 4   |
| 41 | 35 | 49 | 61  | 69  | 61  | 67  | 56  | 61  | 40  |
| 32 | 45 | 53 | 82  | 94  | 67  | 48  | 56  | 51  | 38  |
| 5  | 7  | 13 | 35  | 31  | 21  | 15  | 14  | 17  | 10  |
| 44 | 43 | 40 | 57  | 79  | 80  | 86  | 79  | 98  | 45  |
| 34 | 51 | 51 | 43  | 64  | 33  | 61  | 60  | 44  | 31  |
| 29 | 40 | 33 | 104 | 122 | 127 | 91  | 85  | 91  | 51  |
| 15 | 28 | 37 | 65  | 68  | 51  | 47  | 38  | 58  | 28  |
| 39 | 35 | 39 | 47  | 59  | 60  | 59  | 57  | 51  | 39  |
| 45 | 38 | 56 | 113 | 145 | 104 | 112 | 97  | 92  | 36  |
| 32 | 37 | 38 | 74  | 98  | 76  | 78  | 66  | 38  | 56  |
| 28 | 32 | 37 | 59  | 83  | 74  | 74  | 53  | 62  | 39  |
| 33 | 42 | 46 | 60  | 78  | 75  | 72  | 46  | 57  | 34  |
| 50 | 42 | 50 | 58  | 47  | 45  | 50  | 43  | 48  | 47  |
| 44 | 51 | 53 | 51  | 66  | 60  | 64  | 53  | 49  | 47  |
| 27 | 20 | 21 | 32  | 34  | 38  | 35  | 35  | 34  | 21  |
| 20 | 28 | 31 | 33  | 28  | 34  | 36  | 28  | 41  | 31  |
| 49 | 54 | 52 | 65  | 71  | 65  | 108 | 90  | 106 | 57  |
| 53 | 53 | 69 | 90  | 118 | 95  | 128 | 110 | 112 | 73  |
| 64 | 58 | 46 | 72  | 98  | 71  | 102 | 102 | 99  | 39  |
| 44 | 49 | 55 | 37  | 52  | 45  | 69  | 54  | 60  | 39  |
| 57 | 57 | 52 | 102 | 128 | 131 | 167 | 147 | 157 | 70  |
| 47 | 39 | 58 | 52  | 72  | 77  | 90  | 61  | 63  | 45  |
| 31 | 45 | 34 | 63  | 64  | 64  | 69  | 36  | 72  | 33  |
| 56 | 32 | 39 | 45  | 68  | 44  | 63  | 44  | 46  | 35  |
| 36 | 32 | 30 | 94  | 102 | 78  | 67  | 70  | 77  | 48  |
| 59 | 61 | 56 | 74  | 112 | 72  | 89  | 75  | 93  | 47  |
| 41 | 47 | 33 | 52  | 70  | 59  | 89  | 68  | 66  | 52  |
| 59 | 63 | 77 | 86  | 83  | 76  | 86  | 84  | 112 | 63  |
| 56 | 56 | 70 | 51  | 60  | 60  | 52  | 37  | 55  | 30  |
| 51 | 44 | 46 | 58  | 58  | 51  | 62  | 46  | 43  | 57  |
| 26 | 28 | 28 | 49  | 77  | 58  | 87  | 94  | 92  | 42  |
| 69 | 96 | 89 | 228 | 262 | 245 | 240 | 218 | 268 | 115 |

|     |     |    |     |     |     |     |     |     |     |
|-----|-----|----|-----|-----|-----|-----|-----|-----|-----|
| 19  | 13  | 24 | 36  | 45  | 57  | 63  | 74  | 82  | 30  |
| 65  | 41  | 44 | 175 | 236 | 206 | 256 | 242 | 244 | 111 |
| 62  | 63  | 58 | 204 | 259 | 214 | 281 | 289 | 326 | 105 |
| 61  | 69  | 60 | 73  | 89  | 61  | 117 | 105 | 139 | 76  |
| 52  | 39  | 52 | 114 | 162 | 117 | 182 | 203 | 223 | 100 |
| 15  | 44  | 26 | 115 | 154 | 116 | 124 | 106 | 129 | 39  |
| 14  | 11  | 20 | 25  | 48  | 42  | 57  | 45  | 65  | 10  |
| 70  | 64  | 87 | 100 | 130 | 149 | 101 | 86  | 107 | 58  |
| 21  | 18  | 17 | 43  | 51  | 36  | 34  | 16  | 26  | 11  |
| 12  | 15  | 17 | 16  | 27  | 24  | 27  | 19  | 25  | 20  |
| 32  | 40  | 39 | 104 | 143 | 106 | 115 | 107 | 119 | 55  |
| 32  | 43  | 24 | 71  | 87  | 62  | 68  | 42  | 55  | 34  |
| 18  | 28  | 30 | 42  | 71  | 38  | 45  | 33  | 33  | 25  |
| 29  | 12  | 26 | 33  | 44  | 33  | 27  | 26  | 30  | 23  |
| 58  | 69  | 90 | 54  | 71  | 52  | 79  | 65  | 77  | 81  |
| 20  | 18  | 18 | 44  | 61  | 50  | 46  | 34  | 48  | 17  |
| 29  | 29  | 34 | 58  | 59  | 57  | 42  | 39  | 35  | 39  |
| 38  | 40  | 34 | 112 | 150 | 111 | 116 | 110 | 117 | 50  |
| 63  | 57  | 64 | 85  | 106 | 99  | 173 | 127 | 172 | 99  |
| 16  | 13  | 15 | 26  | 40  | 38  | 33  | 26  | 41  | 12  |
| 38  | 33  | 42 | 82  | 105 | 82  | 80  | 63  | 79  | 54  |
| 45  | 42  | 55 | 155 | 179 | 149 | 208 | 184 | 231 | 83  |
| 35  | 38  | 44 | 57  | 78  | 70  | 73  | 88  | 80  | 47  |
| 13  | 17  | 24 | 39  | 35  | 27  | 33  | 31  | 29  | 11  |
| 25  | 34  | 48 | 66  | 84  | 61  | 76  | 62  | 72  | 39  |
| 90  | 101 | 98 | 97  | 137 | 144 | 105 | 110 | 110 | 69  |
| 102 | 69  | 85 | 96  | 98  | 84  | 75  | 81  | 86  | 72  |
| 71  | 80  | 84 | 54  | 75  | 75  | 91  | 93  | 107 | 69  |
| 41  | 34  | 34 | 47  | 72  | 63  | 41  | 42  | 54  | 54  |
| 42  | 28  | 32 | 63  | 81  | 82  | 49  | 36  | 59  | 40  |
| 58  | 61  | 64 | 144 | 163 | 123 | 105 | 105 | 88  | 59  |
| 27  | 46  | 37 | 57  | 69  | 71  | 62  | 76  | 80  | 28  |
| 68  | 58  | 59 | 71  | 77  | 71  | 72  | 61  | 64  | 38  |
| 69  | 77  | 77 | 127 | 155 | 121 | 150 | 144 | 147 | 83  |
| 38  | 30  | 51 | 72  | 90  | 56  | 65  | 48  | 47  | 49  |
| 56  | 60  | 52 | 40  | 64  | 57  | 54  | 42  | 48  | 55  |
| 49  | 51  | 59 | 73  | 82  | 77  | 80  | 77  | 89  | 61  |
| 42  | 31  | 37 | 40  | 47  | 50  | 22  | 24  | 26  | 29  |
| 56  | 45  | 52 | 84  | 107 | 89  | 66  | 71  | 74  | 38  |
| 8   | 12  | 11 | 13  | 20  | 19  | 18  | 16  | 12  | 10  |
| 64  | 67  | 80 | 88  | 109 | 106 | 98  | 100 | 98  | 55  |



|    |    |     |     |     |     |     |     |     |     |
|----|----|-----|-----|-----|-----|-----|-----|-----|-----|
| 26 | 25 | 24  | 45  | 58  | 59  | 66  | 37  | 57  | 28  |
| 41 | 37 | 32  | 73  | 131 | 102 | 53  | 59  | 71  | 49  |
| 56 | 61 | 57  | 98  | 145 | 103 | 166 | 132 | 167 | 72  |
| 32 | 33 | 38  | 109 | 105 | 103 | 100 | 100 | 80  | 52  |
| 96 | 77 | 77  | 62  | 71  | 76  | 95  | 82  | 108 | 75  |
| 33 | 40 | 42  | 105 | 118 | 118 | 115 | 123 | 112 | 55  |
| 32 | 25 | 22  | 168 | 176 | 130 | 133 | 125 | 152 | 59  |
| 21 | 22 | 21  | 26  | 36  | 23  | 24  | 20  | 28  | 9   |
| 21 | 18 | 31  | 52  | 60  | 54  | 39  | 36  | 37  | 27  |
| 45 | 44 | 42  | 163 | 214 | 170 | 174 | 148 | 154 | 75  |
| 29 | 33 | 33  | 72  | 94  | 87  | 120 | 92  | 124 | 59  |
| 35 | 36 | 34  | 44  | 47  | 35  | 48  | 39  | 41  | 30  |
| 23 | 31 | 26  | 17  | 29  | 26  | 34  | 26  | 28  | 30  |
| 9  | 18 | 20  | 5   | 10  | 6   | 8   | 10  | 12  | 9   |
| 33 | 24 | 40  | 44  | 58  | 57  | 97  | 75  | 58  | 44  |
| 37 | 28 | 40  | 35  | 47  | 52  | 47  | 61  | 45  | 25  |
| 20 | 21 | 14  | 22  | 23  | 20  | 16  | 18  | 20  | 15  |
| 18 | 27 | 27  | 38  | 23  | 27  | 28  | 22  | 24  | 26  |
| 47 | 47 | 52  | 54  | 38  | 41  | 44  | 44  | 34  | 49  |
| 71 | 58 | 66  | 93  | 108 | 114 | 88  | 73  | 91  | 68  |
| 34 | 40 | 34  | 31  | 46  | 50  | 48  | 32  | 38  | 28  |
| 75 | 63 | 77  | 50  | 78  | 68  | 65  | 47  | 69  | 71  |
| 36 | 37 | 42  | 18  | 31  | 30  | 31  | 47  | 53  | 38  |
| 22 | 11 | 18  | 15  | 20  | 15  | 22  | 9   | 13  | 12  |
| 33 | 36 | 33  | 163 | 194 | 182 | 168 | 158 | 152 | 81  |
| 77 | 88 | 80  | 473 | 625 | 544 | 632 | 518 | 598 | 284 |
| 94 | 98 | 103 | 372 | 470 | 413 | 636 | 575 | 660 | 271 |
| 38 | 27 | 39  | 105 | 171 | 146 | 125 | 100 | 131 | 59  |
| 72 | 88 | 101 | 148 | 156 | 137 | 211 | 165 | 192 | 105 |
| 47 | 44 | 50  | 63  | 86  | 68  | 137 | 176 | 147 | 90  |
| 61 | 55 | 57  | 95  | 128 | 106 | 176 | 157 | 173 | 75  |
| 69 | 43 | 63  | 59  | 76  | 44  | 70  | 73  | 89  | 49  |
| 77 | 65 | 68  | 190 | 235 | 199 | 222 | 191 | 207 | 100 |
| 44 | 30 | 55  | 117 | 146 | 133 | 221 | 198 | 212 | 79  |
| 31 | 39 | 26  | 100 | 127 | 128 | 124 | 104 | 139 | 44  |
| 72 | 73 | 99  | 78  | 121 | 94  | 151 | 120 | 139 | 72  |
| 62 | 65 | 66  | 146 | 192 | 176 | 187 | 161 | 158 | 106 |
| 41 | 43 | 49  | 78  | 87  | 87  | 96  | 85  | 101 | 43  |
| 45 | 63 | 55  | 36  | 28  | 33  | 30  | 27  | 39  | 43  |
| 45 | 43 | 45  | 51  | 64  | 62  | 49  | 48  | 48  | 38  |
| 59 | 60 | 63  | 45  | 64  | 34  | 35  | 25  | 23  | 49  |

|     |     |     |     |     |     |     |     |     |     |
|-----|-----|-----|-----|-----|-----|-----|-----|-----|-----|
| 131 | 95  | 122 | 77  | 87  | 85  | 68  | 76  | 74  | 43  |
| 101 | 96  | 122 | 47  | 54  | 49  | 43  | 45  | 55  | 53  |
| 74  | 62  | 83  | 24  | 40  | 30  | 28  | 35  | 36  | 50  |
| 57  | 51  | 58  | 44  | 49  | 39  | 35  | 48  | 48  | 47  |
| 73  | 70  | 69  | 287 | 386 | 369 | 294 | 240 | 284 | 128 |
| 75  | 77  | 74  | 508 | 625 | 503 | 572 | 488 | 542 | 276 |
| 119 | 141 | 148 | 217 | 262 | 291 | 240 | 244 | 278 | 142 |
| 54  | 67  | 63  | 523 | 663 | 563 | 617 | 559 | 672 | 278 |
| 187 | 190 | 213 | 363 | 516 | 418 | 630 | 507 | 586 | 286 |
| 55  | 71  | 66  | 503 | 676 | 523 | 595 | 490 | 602 | 277 |
| 46  | 44  | 61  | 93  | 77  | 60  | 32  | 36  | 44  | 40  |
| 42  | 42  | 45  | 19  | 23  | 22  | 23  | 14  | 22  | 37  |
| 32  | 33  | 27  | 37  | 51  | 43  | 29  | 26  | 30  | 17  |
| 24  | 27  | 28  | 57  | 67  | 64  | 54  | 46  | 46  | 20  |
| 26  | 13  | 38  | 114 | 146 | 135 | 162 | 113 | 114 | 70  |
| 32  | 53  | 62  | 35  | 59  | 57  | 60  | 45  | 51  | 44  |
| 16  | 13  | 16  | 77  | 90  | 74  | 52  | 38  | 52  | 27  |
| 47  | 43  | 44  | 63  | 57  | 54  | 64  | 61  | 66  | 47  |
| 19  | 7   | 19  | 38  | 50  | 46  | 17  | 13  | 22  | 12  |
| 16  | 22  | 24  | 79  | 162 | 95  | 71  | 60  | 62  | 25  |
| 6   | 7   | 10  | 47  | 73  | 62  | 19  | 20  | 17  | 11  |
| 42  | 34  | 42  | 81  | 123 | 93  | 82  | 61  | 77  | 34  |
| 50  | 67  | 53  | 79  | 87  | 75  | 65  | 50  | 72  | 57  |
| 31  | 31  | 31  | 78  | 98  | 84  | 58  | 59  | 84  | 38  |
| 2   | 3   | 2   | 6   | 10  | 5   | 3   | 3   | 5   | 2   |
| 13  | 7   | 10  | 33  | 58  | 43  | 44  | 34  | 41  | 15  |
| 23  | 24  | 22  | 99  | 120 | 134 | 89  | 97  | 98  | 50  |
| 59  | 57  | 87  | 391 | 496 | 453 | 473 | 434 | 495 | 223 |
| 27  | 26  | 26  | 142 | 191 | 143 | 110 | 97  | 118 | 51  |
| 52  | 54  | 48  | 286 | 339 | 292 | 350 | 291 | 332 | 162 |
| 19  | 11  | 17  | 98  | 121 | 91  | 42  | 42  | 39  | 22  |
| 12  | 10  | 16  | 87  | 109 | 92  | 62  | 52  | 47  | 21  |
| 69  | 49  | 76  | 411 | 564 | 535 | 479 | 417 | 433 | 180 |
| 16  | 18  | 28  | 90  | 118 | 92  | 83  | 71  | 61  | 29  |
| 14  | 34  | 23  | 53  | 48  | 56  | 63  | 49  | 68  | 32  |
| 56  | 76  | 66  | 136 | 174 | 149 | 173 | 135 | 166 | 80  |
| 43  | 48  | 58  | 88  | 135 | 101 | 97  | 60  | 80  | 39  |
| 74  | 55  | 66  | 256 | 354 | 284 | 309 | 225 | 292 | 134 |
| 76  | 81  | 98  | 150 | 165 | 160 | 166 | 126 | 167 | 58  |
| 175 | 169 | 168 | 400 | 450 | 400 | 467 | 444 | 494 | 188 |
| 45  | 65  | 56  | 106 | 146 | 107 | 81  | 71  | 74  | 37  |

|     |     |     |     |     |     |     |     |     |     |
|-----|-----|-----|-----|-----|-----|-----|-----|-----|-----|
| 36  | 39  | 33  | 49  | 68  | 51  | 29  | 23  | 32  | 11  |
| 24  | 34  | 24  | 85  | 81  | 64  | 76  | 74  | 62  | 36  |
| 52  | 66  | 44  | 51  | 66  | 51  | 69  | 51  | 76  | 29  |
| 63  | 72  | 65  | 31  | 46  | 37  | 45  | 35  | 42  | 46  |
| 17  | 22  | 21  | 12  | 13  | 16  | 11  | 12  | 6   | 9   |
| 53  | 77  | 65  | 59  | 65  | 57  | 41  | 47  | 56  | 52  |
| 49  | 47  | 52  | 40  | 59  | 52  | 42  | 37  | 31  | 35  |
| 53  | 40  | 47  | 38  | 57  | 60  | 37  | 65  | 38  | 40  |
| 53  | 52  | 75  | 53  | 69  | 66  | 68  | 70  | 75  | 46  |
| 36  | 44  | 32  | 15  | 15  | 17  | 19  | 20  | 27  | 25  |
| 37  | 33  | 37  | 20  | 30  | 21  | 13  | 10  | 11  | 23  |
| 54  | 48  | 58  | 44  | 52  | 51  | 41  | 50  | 44  | 38  |
| 107 | 101 | 112 | 93  | 103 | 70  | 107 | 80  | 98  | 85  |
| 24  | 36  | 33  | 27  | 25  | 20  | 19  | 16  | 15  | 19  |
| 61  | 58  | 50  | 57  | 88  | 59  | 46  | 57  | 68  | 45  |
| 70  | 76  | 74  | 37  | 59  | 42  | 58  | 58  | 71  | 63  |
| 94  | 92  | 105 | 80  | 94  | 91  | 108 | 112 | 121 | 83  |
| 44  | 44  | 31  | 27  | 32  | 31  | 29  | 32  | 33  | 35  |
| 68  | 70  | 59  | 186 | 229 | 199 | 206 | 174 | 188 | 86  |
| 25  | 30  | 28  | 62  | 64  | 67  | 51  | 39  | 58  | 44  |
| 51  | 69  | 47  | 146 | 175 | 134 | 204 | 189 | 195 | 92  |
| 70  | 74  | 63  | 223 | 274 | 246 | 264 | 270 | 299 | 131 |
| 71  | 63  | 69  | 163 | 233 | 176 | 260 | 198 | 230 | 85  |
| 27  | 45  | 50  | 120 | 153 | 129 | 130 | 115 | 122 | 53  |
| 96  | 119 | 94  | 166 | 217 | 159 | 203 | 184 | 181 | 103 |
| 44  | 26  | 38  | 53  | 70  | 68  | 94  | 84  | 78  | 47  |
| 22  | 28  | 28  | 38  | 61  | 39  | 72  | 70  | 58  | 39  |
| 46  | 50  | 45  | 100 | 139 | 119 | 154 | 140 | 138 | 67  |
| 36  | 34  | 43  | 48  | 68  | 60  | 50  | 55  | 65  | 43  |
| 45  | 48  | 49  | 85  | 98  | 81  | 73  | 56  | 57  | 32  |
| 28  | 26  | 48  | 46  | 47  | 30  | 44  | 35  | 48  | 42  |
| 37  | 30  | 43  | 115 | 148 | 151 | 103 | 113 | 104 | 66  |
| 21  | 24  | 27  | 83  | 122 | 89  | 72  | 49  | 65  | 30  |
| 15  | 16  | 13  | 40  | 63  | 38  | 33  | 25  | 29  | 17  |
| 20  | 27  | 30  | 52  | 50  | 48  | 42  | 43  | 43  | 33  |
| 15  | 16  | 8   | 30  | 20  | 20  | 10  | 13  | 15  | 6   |
| 38  | 35  | 38  | 54  | 78  | 55  | 56  | 47  | 38  | 34  |
| 45  | 55  | 65  | 77  | 107 | 103 | 91  | 71  | 106 | 71  |
| 8   | 0   | 1   | 4   | 10  | 4   | 5   | 1   | 12  | 6   |
| 41  | 32  | 49  | 37  | 46  | 40  | 41  | 30  | 36  | 24  |
| 85  | 95  | 102 | 43  | 59  | 46  | 50  | 43  | 51  | 35  |

|     |    |     |     |     |     |     |     |     |     |
|-----|----|-----|-----|-----|-----|-----|-----|-----|-----|
| 50  | 48 | 52  | 60  | 64  | 63  | 51  | 65  | 64  | 58  |
| 122 | 88 | 100 | 106 | 138 | 102 | 98  | 87  | 85  | 45  |
| 20  | 17 | 28  | 88  | 106 | 71  | 69  | 55  | 88  | 25  |
| 21  | 11 | 26  | 32  | 56  | 36  | 40  | 36  | 35  | 15  |
| 24  | 27 | 29  | 33  | 55  | 41  | 36  | 29  | 32  | 12  |
| 77  | 80 | 77  | 171 | 234 | 206 | 150 | 113 | 139 | 96  |
| 53  | 63 | 52  | 142 | 185 | 152 | 145 | 145 | 157 | 92  |
| 12  | 28 | 26  | 25  | 16  | 24  | 35  | 32  | 37  | 19  |
| 27  | 29 | 35  | 99  | 123 | 108 | 85  | 71  | 81  | 41  |
| 46  | 44 | 47  | 79  | 91  | 72  | 94  | 89  | 102 | 51  |
| 58  | 53 | 62  | 201 | 298 | 235 | 204 | 144 | 195 | 88  |
| 28  | 44 | 31  | 95  | 106 | 94  | 96  | 79  | 92  | 45  |
| 72  | 89 | 90  | 177 | 223 | 197 | 215 | 188 | 235 | 102 |
| 23  | 23 | 27  | 52  | 83  | 56  | 67  | 42  | 66  | 34  |
| 52  | 54 | 61  | 76  | 118 | 115 | 120 | 90  | 111 | 65  |
| 26  | 24 | 28  | 52  | 59  | 43  | 50  | 30  | 43  | 25  |
| 43  | 51 | 44  | 163 | 151 | 186 | 87  | 95  | 104 | 58  |
| 13  | 18 | 16  | 22  | 35  | 27  | 20  | 15  | 11  | 16  |
| 24  | 32 | 34  | 65  | 81  | 75  | 65  | 55  | 60  | 37  |
| 64  | 70 | 51  | 135 | 166 | 159 | 112 | 70  | 114 | 68  |
| 26  | 29 | 30  | 54  | 40  | 41  | 35  | 44  | 39  | 24  |
| 39  | 54 | 45  | 77  | 108 | 77  | 102 | 83  | 96  | 67  |
| 35  | 40 | 46  | 66  | 68  | 53  | 50  | 53  | 60  | 43  |
| 41  | 33 | 43  | 21  | 52  | 30  | 36  | 37  | 33  | 37  |
| 36  | 32 | 45  | 57  | 92  | 70  | 59  | 43  | 62  | 41  |
| 62  | 56 | 56  | 74  | 96  | 78  | 124 | 128 | 135 | 68  |
| 49  | 48 | 45  | 103 | 156 | 129 | 163 | 153 | 162 | 67  |
| 47  | 46 | 38  | 36  | 27  | 39  | 37  | 32  | 23  | 31  |
| 41  | 34 | 37  | 29  | 41  | 35  | 29  | 29  | 26  | 27  |
| 16  | 12 | 17  | 9   | 7   | 9   | 13  | 8   | 9   | 13  |
| 57  | 50 | 41  | 164 | 221 | 188 | 115 | 94  | 123 | 72  |
| 25  | 33 | 31  | 80  | 102 | 67  | 43  | 42  | 40  | 44  |
| 63  | 47 | 60  | 82  | 119 | 114 | 145 | 137 | 139 | 71  |
| 41  | 46 | 41  | 208 | 274 | 256 | 337 | 322 | 307 | 152 |
| 62  | 45 | 54  | 34  | 48  | 58  | 57  | 55  | 63  | 46  |
| 66  | 75 | 74  | 77  | 104 | 83  | 92  | 92  | 101 | 69  |
| 41  | 47 | 41  | 42  | 52  | 62  | 57  | 48  | 73  | 36  |
| 44  | 50 | 67  | 92  | 87  | 109 | 119 | 110 | 92  | 66  |
| 17  | 15 | 16  | 21  | 29  | 23  | 31  | 28  | 26  | 19  |
| 57  | 65 | 64  | 71  | 102 | 70  | 113 | 100 | 88  | 60  |
| 34  | 44 | 50  | 28  | 32  | 29  | 45  | 46  | 59  | 49  |

|     |     |     |     |     |     |     |     |     |     |
|-----|-----|-----|-----|-----|-----|-----|-----|-----|-----|
| 62  | 51  | 58  | 103 | 123 | 69  | 151 | 150 | 144 | 68  |
| 68  | 68  | 75  | 103 | 130 | 88  | 92  | 89  | 97  | 73  |
| 49  | 44  | 38  | 93  | 116 | 104 | 116 | 100 | 103 | 54  |
| 25  | 20  | 23  | 45  | 63  | 54  | 43  | 29  | 50  | 23  |
| 58  | 53  | 63  | 140 | 185 | 170 | 143 | 139 | 126 | 77  |
| 32  | 31  | 41  | 91  | 110 | 104 | 112 | 87  | 115 | 55  |
| 57  | 56  | 62  | 96  | 160 | 148 | 137 | 132 | 114 | 75  |
| 46  | 52  | 40  | 67  | 74  | 80  | 68  | 84  | 69  | 44  |
| 158 | 150 | 189 | 197 | 271 | 202 | 246 | 212 | 235 | 164 |
| 40  | 47  | 61  | 96  | 86  | 75  | 114 | 88  | 92  | 42  |
| 28  | 31  | 29  | 117 | 139 | 117 | 125 | 104 | 115 | 49  |
| 26  | 22  | 28  | 74  | 87  | 69  | 70  | 53  | 68  | 38  |
| 36  | 32  | 46  | 109 | 131 | 98  | 103 | 112 | 91  | 62  |
| 27  | 30  | 39  | 74  | 112 | 100 | 74  | 64  | 83  | 42  |
| 56  | 49  | 50  | 233 | 293 | 226 | 388 | 329 | 406 | 184 |
| 33  | 37  | 42  | 64  | 95  | 94  | 116 | 112 | 107 | 52  |
| 29  | 37  | 42  | 36  | 43  | 57  | 35  | 45  | 47  | 33  |
| 42  | 39  | 47  | 81  | 125 | 96  | 92  | 95  | 103 | 62  |
| 82  | 71  | 121 | 97  | 127 | 109 | 142 | 137 | 172 | 106 |
| 25  | 33  | 32  | 112 | 99  | 104 | 71  | 58  | 67  | 32  |
| 31  | 36  | 48  | 99  | 105 | 86  | 71  | 66  | 78  | 32  |
| 31  | 39  | 20  | 185 | 252 | 173 | 164 | 182 | 182 | 78  |
| 24  | 26  | 26  | 49  | 49  | 51  | 36  | 34  | 23  | 28  |
| 16  | 12  | 10  | 97  | 97  | 77  | 86  | 76  | 87  | 28  |
| 9   | 18  | 20  | 65  | 78  | 66  | 62  | 38  | 57  | 19  |
| 66  | 49  | 74  | 104 | 108 | 116 | 131 | 141 | 164 | 74  |
| 58  | 55  | 51  | 111 | 132 | 105 | 103 | 70  | 74  | 63  |
| 44  | 64  | 65  | 82  | 96  | 83  | 70  | 86  | 91  | 53  |
| 56  | 62  | 56  | 99  | 145 | 148 | 130 | 146 | 125 | 99  |
| 67  | 54  | 71  | 246 | 337 | 279 | 322 | 276 | 245 | 139 |
| 62  | 61  | 63  | 296 | 373 | 341 | 416 | 393 | 412 | 176 |
| 45  | 44  | 48  | 121 | 164 | 111 | 112 | 91  | 118 | 57  |
| 31  | 29  | 43  | 70  | 85  | 80  | 52  | 38  | 60  | 37  |
| 9   | 19  | 24  | 18  | 20  | 24  | 18  | 9   | 14  | 14  |
| 71  | 70  | 55  | 154 | 193 | 167 | 169 | 138 | 155 | 94  |
| 44  | 45  | 48  | 176 | 194 | 186 | 190 | 169 | 204 | 107 |
| 40  | 34  | 34  | 18  | 21  | 24  | 26  | 17  | 28  | 25  |
| 32  | 32  | 29  | 50  | 80  | 49  | 47  | 54  | 65  | 34  |
| 32  | 31  | 24  | 23  | 29  | 24  | 17  | 14  | 20  | 18  |
| 28  | 19  | 18  | 45  | 35  | 44  | 37  | 22  | 34  | 19  |
| 37  | 40  | 48  | 63  | 52  | 55  | 33  | 31  | 39  | 25  |

|     |     |     |     |     |     |     |     |     |     |
|-----|-----|-----|-----|-----|-----|-----|-----|-----|-----|
| 25  | 29  | 38  | 37  | 40  | 53  | 38  | 21  | 33  | 25  |
| 22  | 14  | 20  | 30  | 40  | 39  | 29  | 20  | 32  | 19  |
| 45  | 64  | 55  | 65  | 74  | 54  | 52  | 36  | 34  | 44  |
| 40  | 68  | 58  | 81  | 108 | 66  | 71  | 45  | 61  | 44  |
| 31  | 53  | 52  | 39  | 75  | 60  | 42  | 27  | 36  | 29  |
| 20  | 18  | 28  | 27  | 48  | 26  | 25  | 24  | 33  | 19  |
| 87  | 98  | 88  | 80  | 92  | 80  | 80  | 63  | 65  | 81  |
| 23  | 26  | 25  | 38  | 61  | 36  | 41  | 29  | 32  | 28  |
| 65  | 62  | 64  | 183 | 216 | 185 | 154 | 167 | 152 | 94  |
| 29  | 32  | 35  | 127 | 153 | 134 | 136 | 131 | 144 | 62  |
| 27  | 39  | 42  | 50  | 66  | 54  | 44  | 39  | 46  | 36  |
| 72  | 83  | 69  | 115 | 142 | 115 | 196 | 170 | 200 | 104 |
| 32  | 33  | 37  | 61  | 76  | 55  | 57  | 61  | 53  | 35  |
| 19  | 30  | 32  | 19  | 20  | 20  | 36  | 30  | 27  | 34  |
| 50  | 52  | 49  | 107 | 141 | 120 | 141 | 143 | 144 | 86  |
| 29  | 31  | 41  | 59  | 97  | 76  | 59  | 50  | 55  | 31  |
| 100 | 104 | 118 | 95  | 137 | 89  | 190 | 178 | 163 | 125 |
| 28  | 19  | 30  | 11  | 18  | 10  | 15  | 18  | 15  | 16  |
| 28  | 33  | 25  | 54  | 43  | 35  | 46  | 44  | 49  | 35  |
| 29  | 51  | 45  | 45  | 58  | 47  | 47  | 66  | 43  | 36  |
| 8   | 9   | 15  | 11  | 14  | 9   | 12  | 9   | 7   | 14  |
| 44  | 41  | 55  | 93  | 162 | 134 | 102 | 97  | 84  | 41  |
| 24  | 32  | 38  | 114 | 122 | 128 | 126 | 142 | 128 | 66  |
| 67  | 70  | 82  | 98  | 118 | 125 | 117 | 90  | 118 | 67  |
| 20  | 27  | 38  | 23  | 32  | 26  | 20  | 19  | 20  | 26  |
| 67  | 80  | 76  | 124 | 142 | 146 | 194 | 178 | 167 | 83  |
| 57  | 64  | 49  | 110 | 128 | 106 | 176 | 161 | 166 | 93  |
| 34  | 34  | 30  | 28  | 38  | 42  | 15  | 24  | 23  | 21  |
| 39  | 48  | 40  | 58  | 53  | 44  | 51  | 65  | 56  | 36  |
| 117 | 126 | 106 | 119 | 117 | 178 | 217 | 204 | 216 | 124 |
| 50  | 49  | 57  | 52  | 78  | 57  | 50  | 49  | 53  | 48  |
| 60  | 72  | 74  | 93  | 111 | 85  | 77  | 58  | 55  | 54  |
| 44  | 38  | 53  | 31  | 38  | 35  | 35  | 36  | 25  | 20  |
| 1   | 6   | 1   | 1   | 1   | 3   | 3   | 4   | 0   | 0   |
| 49  | 41  | 48  | 87  | 125 | 113 | 93  | 74  | 81  | 70  |
| 48  | 36  | 30  | 51  | 62  | 55  | 34  | 34  | 36  | 29  |
| 84  | 81  | 85  | 134 | 169 | 149 | 111 | 101 | 103 | 79  |
| 73  | 72  | 73  | 177 | 263 | 224 | 284 | 285 | 280 | 118 |
| 47  | 54  | 55  | 60  | 54  | 52  | 54  | 38  | 47  | 39  |
| 14  | 17  | 19  | 42  | 48  | 47  | 40  | 30  | 38  | 15  |
| 56  | 32  | 49  | 70  | 99  | 84  | 64  | 74  | 58  | 45  |

|     |     |     |     |     |     |     |     |     |     |
|-----|-----|-----|-----|-----|-----|-----|-----|-----|-----|
| 45  | 42  | 48  | 119 | 168 | 160 | 143 | 100 | 124 | 68  |
| 56  | 50  | 70  | 61  | 76  | 71  | 65  | 58  | 73  | 46  |
| 29  | 33  | 39  | 170 | 224 | 214 | 168 | 139 | 164 | 65  |
| 19  | 13  | 26  | 69  | 66  | 64  | 60  | 53  | 55  | 28  |
| 37  | 57  | 47  | 73  | 107 | 80  | 89  | 58  | 95  | 49  |
| 142 | 127 | 163 | 152 | 205 | 164 | 167 | 198 | 190 | 130 |
| 95  | 90  | 123 | 81  | 116 | 114 | 108 | 108 | 124 | 99  |
| 50  | 56  | 37  | 83  | 102 | 81  | 135 | 150 | 121 | 67  |
| 83  | 90  | 98  | 94  | 130 | 99  | 105 | 92  | 113 | 89  |
| 94  | 80  | 103 | 87  | 94  | 81  | 106 | 88  | 95  | 74  |
| 71  | 63  | 66  | 48  | 69  | 58  | 59  | 68  | 53  | 49  |
| 150 | 126 | 167 | 162 | 173 | 147 | 182 | 172 | 170 | 166 |
| 143 | 139 | 163 | 212 | 309 | 288 | 365 | 371 | 438 | 199 |
| 91  | 97  | 95  | 97  | 132 | 126 | 127 | 115 | 117 | 87  |
| 112 | 142 | 123 | 160 | 210 | 160 | 182 | 192 | 187 | 148 |
| 12  | 19  | 23  | 14  | 24  | 12  | 19  | 14  | 13  | 16  |
| 24  | 16  | 17  | 24  | 22  | 23  | 33  | 35  | 44  | 22  |
| 23  | 26  | 35  | 77  | 116 | 94  | 83  | 67  | 93  | 43  |
| 93  | 91  | 111 | 106 | 151 | 121 | 187 | 196 | 180 | 112 |
| 42  | 36  | 32  | 98  | 138 | 106 | 150 | 120 | 151 | 62  |
| 29  | 29  | 29  | 155 | 221 | 178 | 179 | 125 | 121 | 71  |
| 69  | 90  | 77  | 90  | 135 | 123 | 116 | 117 | 113 | 74  |
| 64  | 74  | 96  | 51  | 83  | 88  | 65  | 73  | 78  | 63  |
| 94  | 98  | 111 | 150 | 227 | 173 | 178 | 148 | 180 | 103 |
| 125 | 140 | 145 | 132 | 172 | 176 | 178 | 150 | 152 | 98  |
| 67  | 44  | 65  | 164 | 206 | 180 | 172 | 216 | 183 | 80  |
| 77  | 73  | 76  | 62  | 71  | 64  | 44  | 49  | 55  | 41  |
| 32  | 22  | 43  | 31  | 32  | 32  | 52  | 45  | 40  | 29  |
| 25  | 26  | 30  | 13  | 24  | 19  | 21  | 17  | 26  | 20  |
| 45  | 47  | 42  | 52  | 59  | 46  | 44  | 33  | 60  | 37  |
| 25  | 38  | 37  | 33  | 49  | 36  | 13  | 20  | 26  | 24  |
| 9   | 9   | 11  | 15  | 35  | 33  | 29  | 27  | 17  | 9   |
| 44  | 44  | 50  | 53  | 75  | 62  | 48  | 69  | 58  | 47  |
| 26  | 31  | 30  | 25  | 24  | 14  | 21  | 20  | 19  | 22  |
| 37  | 47  | 39  | 35  | 46  | 44  | 44  | 35  | 26  | 16  |
| 41  | 52  | 44  | 194 | 274 | 210 | 242 | 274 | 245 | 90  |
| 38  | 20  | 32  | 57  | 69  | 67  | 61  | 58  | 56  | 20  |
| 69  | 56  | 75  | 201 | 264 | 219 | 222 | 199 | 228 | 108 |
| 55  | 67  | 52  | 94  | 99  | 87  | 110 | 108 | 121 | 51  |
| 4   | 7   | 8   | 9   | 8   | 5   | 20  | 8   | 12  | 6   |
| 58  | 60  | 86  | 125 | 179 | 132 | 165 | 135 | 147 | 73  |

|     |     |     |     |     |     |     |     |     |     |
|-----|-----|-----|-----|-----|-----|-----|-----|-----|-----|
| 11  | 19  | 19  | 28  | 22  | 35  | 31  | 32  | 34  | 19  |
| 39  | 32  | 39  | 48  | 45  | 42  | 45  | 35  | 31  | 28  |
| 53  | 45  | 56  | 53  | 79  | 60  | 73  | 58  | 74  | 43  |
| 28  | 23  | 30  | 25  | 49  | 28  | 43  | 26  | 29  | 30  |
| 61  | 50  | 72  | 82  | 104 | 83  | 64  | 47  | 75  | 55  |
| 50  | 34  | 59  | 70  | 91  | 90  | 77  | 56  | 62  | 48  |
| 29  | 33  | 31  | 49  | 73  | 50  | 66  | 58  | 54  | 32  |
| 49  | 46  | 33  | 58  | 83  | 92  | 70  | 55  | 55  | 43  |
| 19  | 12  | 15  | 19  | 23  | 24  | 23  | 18  | 19  | 14  |
| 24  | 27  | 27  | 34  | 45  | 54  | 37  | 39  | 39  | 29  |
| 39  | 49  | 60  | 41  | 81  | 61  | 53  | 62  | 65  | 35  |
| 52  | 27  | 47  | 59  | 88  | 64  | 51  | 50  | 63  | 45  |
| 53  | 56  | 59  | 82  | 88  | 80  | 71  | 75  | 69  | 53  |
| 107 | 92  | 108 | 171 | 209 | 194 | 171 | 141 | 178 | 102 |
| 34  | 46  | 45  | 113 | 119 | 122 | 118 | 97  | 115 | 63  |
| 45  | 38  | 48  | 82  | 133 | 114 | 78  | 91  | 83  | 66  |
| 40  | 47  | 59  | 44  | 60  | 59  | 68  | 57  | 62  | 42  |
| 41  | 33  | 51  | 101 | 167 | 139 | 147 | 130 | 154 | 68  |
| 60  | 66  | 66  | 151 | 194 | 190 | 154 | 134 | 127 | 70  |
| 46  | 51  | 58  | 82  | 97  | 86  | 83  | 77  | 75  | 58  |
| 21  | 28  | 20  | 38  | 57  | 36  | 30  | 16  | 18  | 20  |
| 67  | 63  | 60  | 104 | 121 | 105 | 115 | 94  | 109 | 67  |
| 41  | 44  | 42  | 62  | 69  | 77  | 58  | 43  | 52  | 34  |
| 32  | 33  | 42  | 50  | 71  | 41  | 71  | 44  | 44  | 31  |
| 61  | 63  | 60  | 95  | 125 | 117 | 157 | 142 | 144 | 68  |
| 46  | 47  | 68  | 120 | 156 | 148 | 144 | 171 | 154 | 90  |
| 75  | 106 | 115 | 253 | 290 | 278 | 319 | 307 | 325 | 148 |
| 98  | 107 | 99  | 286 | 343 | 316 | 423 | 414 | 391 | 146 |
| 42  | 52  | 41  | 118 | 151 | 124 | 151 | 144 | 125 | 61  |
| 64  | 80  | 70  | 163 | 183 | 217 | 232 | 240 | 221 | 134 |
| 55  | 41  | 68  | 181 | 179 | 160 | 173 | 164 | 189 | 97  |
| 65  | 76  | 51  | 151 | 204 | 180 | 191 | 173 | 159 | 98  |
| 44  | 50  | 46  | 111 | 143 | 114 | 150 | 151 | 167 | 70  |
| 70  | 74  | 71  | 102 | 139 | 139 | 163 | 146 | 148 | 114 |
| 53  | 48  | 70  | 69  | 101 | 82  | 82  | 74  | 84  | 67  |
| 46  | 55  | 80  | 67  | 87  | 70  | 87  | 91  | 61  | 64  |
| 40  | 62  | 55  | 93  | 114 | 109 | 132 | 127 | 126 | 97  |
| 71  | 75  | 79  | 130 | 131 | 123 | 138 | 131 | 121 | 88  |
| 35  | 34  | 40  | 85  | 73  | 68  | 99  | 90  | 94  | 39  |
| 37  | 36  | 42  | 59  | 57  | 70  | 72  | 53  | 90  | 40  |
| 40  | 53  | 32  | 60  | 70  | 61  | 69  | 66  | 65  | 56  |



|     |     |     |     |     |     |     |     |     |     |
|-----|-----|-----|-----|-----|-----|-----|-----|-----|-----|
| 25  | 25  | 26  | 32  | 37  | 36  | 33  | 37  | 39  | 19  |
| 75  | 59  | 76  | 86  | 98  | 97  | 127 | 107 | 122 | 70  |
| 75  | 58  | 71  | 209 | 286 | 248 | 302 | 282 | 326 | 144 |
| 66  | 45  | 51  | 68  | 58  | 54  | 49  | 61  | 54  | 43  |
| 50  | 55  | 48  | 70  | 70  | 75  | 68  | 83  | 63  | 38  |
| 60  | 49  | 60  | 128 | 177 | 132 | 153 | 130 | 149 | 62  |
| 48  | 38  | 52  | 146 | 151 | 148 | 136 | 119 | 164 | 72  |
| 79  | 93  | 95  | 179 | 235 | 199 | 169 | 149 | 186 | 102 |
| 50  | 54  | 62  | 113 | 172 | 130 | 127 | 99  | 117 | 69  |
| 61  | 49  | 61  | 95  | 107 | 121 | 94  | 72  | 73  | 56  |
| 67  | 58  | 59  | 56  | 76  | 54  | 54  | 61  | 55  | 43  |
| 62  | 55  | 66  | 130 | 136 | 147 | 121 | 116 | 110 | 78  |
| 37  | 30  | 43  | 72  | 121 | 92  | 98  | 60  | 104 | 49  |
| 35  | 34  | 36  | 130 | 134 | 145 | 128 | 141 | 142 | 71  |
| 58  | 55  | 58  | 115 | 145 | 139 | 106 | 119 | 140 | 71  |
| 49  | 51  | 65  | 56  | 43  | 54  | 60  | 60  | 62  | 47  |
| 59  | 80  | 91  | 76  | 102 | 101 | 63  | 71  | 91  | 37  |
| 15  | 23  | 21  | 12  | 7   | 3   | 8   | 6   | 7   | 16  |
| 94  | 111 | 95  | 142 | 167 | 147 | 141 | 130 | 138 | 91  |
| 106 | 124 | 112 | 90  | 92  | 93  | 118 | 105 | 115 | 92  |
| 77  | 80  | 100 | 100 | 123 | 101 | 126 | 110 | 130 | 70  |
| 37  | 49  | 46  | 34  | 45  | 47  | 51  | 42  | 50  | 23  |
| 33  | 33  | 38  | 87  | 135 | 85  | 132 | 123 | 116 | 47  |
| 92  | 89  | 120 | 159 | 213 | 181 | 224 | 233 | 200 | 114 |
| 17  | 13  | 14  | 14  | 21  | 23  | 11  | 5   | 13  | 10  |
| 29  | 32  | 19  | 25  | 25  | 21  | 30  | 24  | 26  | 24  |
| 44  | 43  | 46  | 43  | 50  | 42  | 37  | 35  | 36  | 26  |
| 30  | 40  | 35  | 21  | 31  | 35  | 26  | 40  | 34  | 37  |
| 28  | 32  | 36  | 30  | 47  | 32  | 39  | 32  | 37  | 33  |
| 35  | 35  | 47  | 46  | 75  | 66  | 46  | 33  | 50  | 36  |
| 26  | 21  | 40  | 24  | 25  | 28  | 26  | 12  | 27  | 17  |
| 24  | 17  | 19  | 16  | 26  | 24  | 17  | 21  | 14  | 11  |
| 27  | 29  | 42  | 24  | 37  | 35  | 59  | 42  | 51  | 35  |
| 27  | 21  | 38  | 24  | 27  | 20  | 18  | 22  | 29  | 34  |
| 37  | 37  | 49  | 74  | 95  | 87  | 57  | 55  | 50  | 43  |
| 11  | 6   | 13  | 23  | 16  | 15  | 24  | 28  | 14  | 16  |
| 72  | 84  | 88  | 134 | 143 | 135 | 112 | 84  | 93  | 91  |
| 54  | 63  | 73  | 140 | 167 | 160 | 215 | 244 | 185 | 90  |
| 43  | 51  | 45  | 160 | 159 | 175 | 209 | 201 | 203 | 107 |
| 37  | 31  | 41  | 60  | 75  | 61  | 66  | 76  | 93  | 48  |
| 94  | 79  | 91  | 451 | 532 | 475 | 585 | 530 | 542 | 252 |

|     |     |     |     |     |     |     |     |     |     |
|-----|-----|-----|-----|-----|-----|-----|-----|-----|-----|
| 86  | 76  | 116 | 141 | 190 | 177 | 128 | 120 | 146 | 107 |
| 46  | 36  | 45  | 97  | 109 | 105 | 114 | 124 | 117 | 54  |
| 26  | 26  | 27  | 66  | 80  | 51  | 90  | 81  | 86  | 32  |
| 30  | 30  | 40  | 195 | 261 | 240 | 272 | 224 | 240 | 102 |
| 49  | 56  | 52  | 107 | 142 | 125 | 125 | 97  | 105 | 68  |
| 49  | 43  | 56  | 112 | 124 | 121 | 174 | 145 | 155 | 90  |
| 29  | 35  | 21  | 125 | 148 | 123 | 132 | 130 | 145 | 58  |
| 64  | 66  | 56  | 243 | 316 | 269 | 268 | 249 | 283 | 115 |
| 95  | 76  | 121 | 188 | 324 | 272 | 331 | 275 | 346 | 169 |
| 52  | 40  | 51  | 135 | 150 | 139 | 123 | 104 | 117 | 58  |
| 99  | 91  | 107 | 270 | 357 | 331 | 373 | 323 | 380 | 176 |
| 85  | 86  | 92  | 131 | 158 | 146 | 218 | 227 | 218 | 104 |
| 11  | 20  | 12  | 13  | 19  | 16  | 26  | 26  | 25  | 7   |
| 44  | 35  | 58  | 117 | 140 | 107 | 147 | 164 | 133 | 75  |
| 62  | 69  | 71  | 268 | 380 | 336 | 338 | 294 | 355 | 127 |
| 37  | 41  | 27  | 122 | 164 | 164 | 181 | 155 | 192 | 113 |
| 43  | 43  | 41  | 237 | 293 | 260 | 281 | 223 | 242 | 114 |
| 66  | 85  | 72  | 230 | 328 | 281 | 334 | 290 | 317 | 162 |
| 61  | 51  | 71  | 138 | 213 | 169 | 242 | 254 | 244 | 106 |
| 48  | 30  | 26  | 126 | 161 | 179 | 104 | 98  | 117 | 65  |
| 45  | 66  | 62  | 440 | 556 | 496 | 388 | 373 | 418 | 177 |
| 69  | 60  | 63  | 199 | 249 | 206 | 242 | 208 | 240 | 117 |
| 34  | 42  | 41  | 373 | 437 | 363 | 464 | 398 | 403 | 167 |
| 58  | 63  | 49  | 239 | 299 | 304 | 232 | 206 | 254 | 92  |
| 54  | 73  | 79  | 119 | 138 | 120 | 139 | 109 | 136 | 64  |
| 34  | 51  | 39  | 71  | 91  | 93  | 79  | 48  | 68  | 42  |
| 34  | 41  | 47  | 102 | 108 | 117 | 85  | 68  | 80  | 57  |
| 38  | 28  | 35  | 106 | 138 | 108 | 152 | 134 | 164 | 88  |
| 39  | 35  | 51  | 133 | 137 | 150 | 136 | 125 | 136 | 74  |
| 72  | 50  | 52  | 53  | 90  | 92  | 89  | 79  | 82  | 59  |
| 29  | 44  | 30  | 31  | 39  | 35  | 30  | 28  | 24  | 37  |
| 33  | 35  | 44  | 33  | 44  | 44  | 59  | 49  | 48  | 43  |
| 58  | 68  | 64  | 48  | 70  | 62  | 59  | 50  | 54  | 45  |
| 49  | 45  | 50  | 76  | 77  | 61  | 60  | 52  | 54  | 57  |
| 135 | 126 | 133 | 102 | 127 | 101 | 147 | 107 | 121 | 130 |
| 76  | 72  | 71  | 76  | 107 | 72  | 56  | 53  | 56  | 51  |
| 145 | 145 | 167 | 105 | 144 | 132 | 165 | 188 | 177 | 166 |
| 59  | 55  | 61  | 32  | 51  | 45  | 57  | 56  | 70  | 48  |
| 33  | 49  | 39  | 47  | 52  | 42  | 54  | 61  | 52  | 29  |
| 55  | 67  | 64  | 88  | 109 | 102 | 118 | 81  | 102 | 72  |
| 50  | 34  | 58  | 112 | 151 | 130 | 87  | 92  | 70  | 41  |

|     |     |     |     |     |     |     |     |     |     |
|-----|-----|-----|-----|-----|-----|-----|-----|-----|-----|
| 57  | 75  | 54  | 119 | 127 | 136 | 85  | 78  | 79  | 73  |
| 11  | 23  | 20  | 20  | 18  | 19  | 16  | 10  | 15  | 15  |
| 38  | 44  | 65  | 45  | 51  | 54  | 41  | 47  | 52  | 41  |
| 16  | 18  | 12  | 19  | 27  | 16  | 23  | 8   | 30  | 16  |
| 29  | 45  | 29  | 17  | 21  | 20  | 28  | 27  | 28  | 18  |
| 72  | 73  | 87  | 50  | 57  | 50  | 65  | 75  | 73  | 49  |
| 34  | 42  | 37  | 47  | 64  | 36  | 59  | 62  | 52  | 34  |
| 12  | 18  | 16  | 16  | 9   | 13  | 13  | 7   | 8   | 14  |
| 72  | 68  | 66  | 60  | 91  | 74  | 98  | 73  | 100 | 72  |
| 66  | 95  | 67  | 82  | 103 | 96  | 98  | 92  | 129 | 73  |
| 43  | 52  | 46  | 58  | 65  | 60  | 99  | 80  | 110 | 48  |
| 45  | 23  | 33  | 102 | 135 | 130 | 130 | 135 | 148 | 59  |
| 31  | 42  | 30  | 256 | 292 | 244 | 374 | 295 | 370 | 156 |
| 26  | 26  | 17  | 20  | 22  | 23  | 19  | 29  | 28  | 20  |
| 38  | 39  | 43  | 34  | 28  | 48  | 41  | 56  | 40  | 41  |
| 24  | 25  | 20  | 33  | 33  | 31  | 25  | 31  | 26  | 16  |
| 13  | 23  | 22  | 28  | 30  | 39  | 47  | 30  | 42  | 20  |
| 60  | 49  | 62  | 73  | 109 | 105 | 127 | 89  | 112 | 54  |
| 30  | 33  | 41  | 29  | 35  | 22  | 29  | 50  | 36  | 21  |
| 36  | 49  | 45  | 49  | 54  | 49  | 44  | 39  | 47  | 36  |
| 26  | 27  | 27  | 55  | 71  | 63  | 59  | 55  | 61  | 46  |
| 57  | 77  | 77  | 84  | 92  | 104 | 83  | 89  | 99  | 71  |
| 53  | 59  | 68  | 64  | 80  | 72  | 90  | 118 | 97  | 79  |
| 63  | 56  | 50  | 72  | 106 | 67  | 72  | 62  | 70  | 49  |
| 64  | 43  | 68  | 45  | 53  | 44  | 54  | 54  | 75  | 46  |
| 67  | 63  | 60  | 37  | 75  | 62  | 59  | 41  | 49  | 60  |
| 38  | 46  | 36  | 53  | 47  | 54  | 53  | 33  | 44  | 27  |
| 42  | 39  | 52  | 68  | 98  | 89  | 119 | 95  | 98  | 67  |
| 45  | 48  | 66  | 101 | 141 | 110 | 239 | 232 | 244 | 110 |
| 28  | 47  | 43  | 69  | 98  | 66  | 70  | 62  | 81  | 59  |
| 73  | 74  | 75  | 178 | 263 | 213 | 239 | 231 | 247 | 119 |
| 53  | 52  | 56  | 84  | 97  | 105 | 133 | 126 | 123 | 64  |
| 81  | 69  | 70  | 154 | 156 | 151 | 206 | 239 | 254 | 114 |
| 55  | 51  | 66  | 139 | 210 | 175 | 167 | 144 | 181 | 68  |
| 120 | 116 | 112 | 283 | 343 | 324 | 354 | 295 | 349 | 169 |
| 73  | 106 | 122 | 236 | 298 | 243 | 355 | 302 | 326 | 195 |
| 45  | 41  | 65  | 225 | 246 | 190 | 245 | 174 | 223 | 81  |
| 91  | 59  | 75  | 139 | 174 | 150 | 193 | 151 | 169 | 65  |
| 27  | 29  | 27  | 52  | 40  | 53  | 49  | 61  | 49  | 45  |
| 56  | 36  | 65  | 75  | 114 | 99  | 114 | 99  | 101 | 55  |
| 53  | 38  | 43  | 50  | 70  | 88  | 48  | 42  | 89  | 46  |

|     |     |     |     |     |     |     |     |     |     |
|-----|-----|-----|-----|-----|-----|-----|-----|-----|-----|
| 42  | 51  | 54  | 74  | 89  | 111 | 77  | 68  | 91  | 39  |
| 74  | 62  | 69  | 221 | 270 | 281 | 290 | 244 | 281 | 152 |
| 30  | 33  | 26  | 27  | 49  | 49  | 49  | 38  | 31  | 24  |
| 62  | 62  | 55  | 157 | 207 | 215 | 160 | 137 | 169 | 87  |
| 38  | 28  | 41  | 63  | 83  | 79  | 102 | 70  | 73  | 40  |
| 44  | 57  | 42  | 120 | 206 | 145 | 160 | 108 | 172 | 82  |
| 43  | 54  | 40  | 71  | 102 | 74  | 86  | 66  | 85  | 52  |
| 85  | 83  | 88  | 129 | 185 | 147 | 178 | 150 | 159 | 75  |
| 68  | 66  | 64  | 206 | 270 | 212 | 355 | 337 | 346 | 155 |
| 86  | 94  | 97  | 143 | 174 | 146 | 225 | 195 | 205 | 97  |
| 70  | 53  | 55  | 192 | 256 | 209 | 173 | 156 | 177 | 82  |
| 135 | 117 | 180 | 230 | 294 | 268 | 207 | 212 | 218 | 105 |
| 63  | 56  | 66  | 71  | 119 | 75  | 67  | 60  | 62  | 42  |
| 57  | 44  | 66  | 135 | 240 | 128 | 131 | 74  | 98  | 40  |
| 25  | 24  | 28  | 62  | 106 | 72  | 42  | 41  | 46  | 31  |
| 85  | 78  | 102 | 132 | 141 | 127 | 97  | 84  | 121 | 55  |
| 33  | 30  | 45  | 57  | 76  | 48  | 78  | 41  | 55  | 27  |
| 35  | 46  | 27  | 55  | 72  | 62  | 83  | 63  | 65  | 38  |
| 62  | 48  | 70  | 151 | 204 | 131 | 171 | 166 | 165 | 82  |
| 53  | 63  | 58  | 70  | 84  | 74  | 103 | 81  | 94  | 56  |
| 34  | 41  | 29  | 101 | 134 | 122 | 115 | 112 | 103 | 57  |
| 53  | 54  | 74  | 329 | 418 | 381 | 423 | 319 | 353 | 121 |
| 36  | 19  | 22  | 61  | 93  | 69  | 109 | 86  | 103 | 40  |
| 39  | 42  | 35  | 106 | 140 | 104 | 95  | 57  | 59  | 47  |
| 22  | 18  | 22  | 14  | 16  | 17  | 18  | 11  | 20  | 16  |
| 19  | 16  | 31  | 32  | 46  | 23  | 29  | 26  | 19  | 15  |
| 26  | 44  | 39  | 49  | 71  | 48  | 45  | 29  | 31  | 45  |
| 21  | 27  | 30  | 53  | 69  | 65  | 51  | 37  | 37  | 26  |
| 29  | 34  | 33  | 60  | 75  | 59  | 56  | 53  | 53  | 38  |
| 38  | 43  | 41  | 92  | 100 | 86  | 111 | 86  | 105 | 42  |
| 60  | 73  | 66  | 122 | 161 | 162 | 121 | 113 | 127 | 65  |
| 54  | 63  | 58  | 99  | 121 | 113 | 115 | 104 | 119 | 90  |
| 57  | 46  | 43  | 73  | 64  | 83  | 69  | 75  | 64  | 40  |
| 38  | 26  | 36  | 51  | 67  | 74  | 56  | 53  | 52  | 32  |
| 35  | 56  | 44  | 156 | 252 | 190 | 184 | 180 | 205 | 102 |
| 29  | 39  | 44  | 138 | 175 | 122 | 146 | 117 | 115 | 69  |
| 17  | 20  | 28  | 36  | 56  | 45  | 39  | 41  | 48  | 33  |
| 54  | 44  | 50  | 187 | 222 | 204 | 210 | 160 | 200 | 94  |
| 23  | 30  | 32  | 43  | 63  | 52  | 58  | 57  | 61  | 28  |
| 20  | 20  | 30  | 28  | 37  | 38  | 48  | 53  | 52  | 27  |
| 19  | 22  | 18  | 15  | 20  | 12  | 27  | 24  | 21  | 14  |

|    |    |    |     |     |     |     |     |     |     |
|----|----|----|-----|-----|-----|-----|-----|-----|-----|
| 44 | 47 | 53 | 66  | 97  | 93  | 113 | 88  | 105 | 61  |
| 85 | 75 | 87 | 94  | 117 | 89  | 114 | 109 | 147 | 71  |
| 50 | 59 | 73 | 48  | 83  | 50  | 98  | 90  | 91  | 58  |
| 15 | 15 | 25 | 41  | 51  | 36  | 39  | 36  | 42  | 28  |
| 16 | 18 | 28 | 38  | 29  | 33  | 49  | 26  | 48  | 29  |
| 30 | 33 | 28 | 27  | 26  | 39  | 28  | 17  | 33  | 17  |
| 7  | 21 | 19 | 28  | 38  | 24  | 35  | 24  | 28  | 17  |
| 40 | 43 | 52 | 27  | 39  | 38  | 29  | 28  | 34  | 28  |
| 16 | 7  | 15 | 23  | 24  | 28  | 23  | 21  | 24  | 18  |
| 9  | 9  | 6  | 14  | 19  | 19  | 21  | 20  | 29  | 10  |
| 26 | 26 | 39 | 38  | 54  | 44  | 41  | 33  | 43  | 25  |
| 28 | 19 | 14 | 14  | 17  | 19  | 32  | 20  | 32  | 17  |
| 35 | 33 | 32 | 108 | 152 | 122 | 202 | 140 | 152 | 71  |
| 26 | 30 | 36 | 55  | 66  | 58  | 52  | 49  | 58  | 28  |
| 57 | 48 | 70 | 366 | 498 | 394 | 402 | 348 | 381 | 185 |
| 30 | 29 | 40 | 346 | 455 | 392 | 322 | 294 | 336 | 108 |
| 34 | 30 | 37 | 248 | 321 | 293 | 298 | 231 | 291 | 128 |
| 78 | 65 | 61 | 316 | 436 | 390 | 370 | 302 | 386 | 132 |
| 16 | 16 | 17 | 98  | 131 | 102 | 110 | 93  | 95  | 40  |
| 3  | 1  | 4  | 21  | 29  | 18  | 4   | 5   | 16  | 3   |
| 45 | 42 | 51 | 94  | 117 | 123 | 100 | 110 | 103 | 55  |
| 72 | 63 | 55 | 355 | 495 | 387 | 469 | 388 | 399 | 181 |
| 25 | 20 | 15 | 187 | 235 | 180 | 137 | 119 | 143 | 54  |
| 39 | 44 | 49 | 291 | 369 | 300 | 266 | 260 | 268 | 135 |
| 69 | 68 | 66 | 77  | 80  | 68  | 97  | 101 | 111 | 75  |
| 20 | 33 | 27 | 21  | 37  | 33  | 31  | 27  | 30  | 27  |
| 28 | 39 | 49 | 86  | 104 | 107 | 90  | 94  | 106 | 54  |
| 51 | 49 | 68 | 98  | 118 | 116 | 120 | 120 | 116 | 72  |
| 39 | 50 | 41 | 80  | 105 | 107 | 118 | 103 | 122 | 53  |
| 25 | 31 | 28 | 25  | 26  | 31  | 33  | 36  | 45  | 31  |
| 61 | 69 | 79 | 69  | 76  | 89  | 118 | 110 | 85  | 65  |
| 72 | 70 | 68 | 66  | 79  | 76  | 95  | 84  | 93  | 59  |
| 58 | 48 | 75 | 73  | 82  | 59  | 122 | 120 | 142 | 61  |
| 49 | 56 | 41 | 123 | 186 | 146 | 127 | 150 | 134 | 74  |
| 41 | 44 | 50 | 45  | 52  | 44  | 45  | 45  | 60  | 43  |
| 78 | 79 | 88 | 191 | 232 | 173 | 153 | 191 | 159 | 130 |
| 29 | 26 | 19 | 101 | 132 | 108 | 88  | 90  | 82  | 43  |
| 60 | 70 | 81 | 242 | 305 | 279 | 239 | 195 | 242 | 116 |
| 35 | 32 | 38 | 96  | 114 | 106 | 66  | 72  | 75  | 39  |
| 30 | 29 | 32 | 83  | 74  | 93  | 59  | 77  | 65  | 41  |
| 27 | 35 | 36 | 36  | 54  | 41  | 48  | 44  | 42  | 31  |

|     |     |     |     |     |     |     |     |     |     |
|-----|-----|-----|-----|-----|-----|-----|-----|-----|-----|
| 4   | 10  | 11  | 9   | 14  | 19  | 14  | 14  | 16  | 17  |
| 135 | 131 | 169 | 81  | 127 | 114 | 97  | 86  | 103 | 89  |
| 70  | 49  | 59  | 97  | 167 | 140 | 137 | 163 | 135 | 84  |
| 20  | 32  | 38  | 29  | 44  | 46  | 47  | 48  | 46  | 39  |
| 22  | 21  | 20  | 18  | 8   | 17  | 18  | 17  | 9   | 16  |
| 20  | 19  | 29  | 16  | 20  | 31  | 33  | 37  | 36  | 23  |
| 30  | 26  | 27  | 35  | 34  | 27  | 25  | 21  | 26  | 18  |
| 141 | 157 | 163 | 104 | 120 | 111 | 152 | 169 | 194 | 105 |
| 10  | 17  | 18  | 6   | 13  | 8   | 16  | 12  | 18  | 13  |
| 43  | 38  | 37  | 72  | 100 | 78  | 112 | 103 | 109 | 61  |
| 30  | 37  | 27  | 50  | 54  | 43  | 56  | 42  | 58  | 43  |
| 89  | 87  | 104 | 140 | 201 | 145 | 143 | 116 | 114 | 107 |
| 34  | 25  | 30  | 43  | 53  | 47  | 42  | 42  | 55  | 33  |
| 36  | 42  | 31  | 35  | 53  | 43  | 35  | 45  | 40  | 27  |
| 35  | 35  | 45  | 99  | 153 | 104 | 235 | 232 | 261 | 112 |
| 22  | 26  | 18  | 19  | 20  | 19  | 45  | 36  | 46  | 32  |
| 46  | 60  | 44  | 69  | 71  | 72  | 77  | 68  | 82  | 57  |
| 21  | 16  | 32  | 97  | 124 | 100 | 31  | 25  | 33  | 19  |
| 11  | 22  | 20  | 58  | 60  | 57  | 43  | 28  | 25  | 17  |
| 12  | 9   | 10  | 19  | 18  | 15  | 8   | 6   | 10  | 7   |
| 16  | 20  | 26  | 16  | 14  | 23  | 28  | 19  | 18  | 15  |
| 52  | 56  | 47  | 96  | 119 | 93  | 87  | 80  | 101 | 57  |
| 16  | 19  | 19  | 60  | 73  | 56  | 45  | 32  | 53  | 15  |
| 33  | 35  | 34  | 63  | 89  | 55  | 45  | 46  | 68  | 37  |
| 30  | 23  | 28  | 28  | 37  | 24  | 32  | 22  | 32  | 17  |
| 28  | 26  | 19  | 45  | 53  | 49  | 59  | 46  | 72  | 28  |
| 131 | 154 | 136 | 235 | 312 | 264 | 270 | 232 | 271 | 143 |
| 45  | 47  | 49  | 88  | 134 | 103 | 90  | 72  | 92  | 67  |
| 41  | 42  | 54  | 234 | 288 | 250 | 174 | 175 | 179 | 80  |
| 65  | 67  | 85  | 120 | 152 | 134 | 111 | 101 | 109 | 78  |
| 35  | 41  | 52  | 98  | 104 | 100 | 69  | 69  | 83  | 48  |
| 58  | 59  | 61  | 106 | 142 | 113 | 91  | 102 | 100 | 60  |
| 39  | 35  | 35  | 56  | 60  | 49  | 35  | 35  | 44  | 38  |
| 30  | 35  | 37  | 26  | 24  | 27  | 33  | 29  | 39  | 38  |
| 48  | 42  | 43  | 178 | 252 | 234 | 95  | 97  | 103 | 57  |
| 45  | 53  | 58  | 333 | 484 | 362 | 269 | 242 | 259 | 130 |
| 22  | 26  | 36  | 108 | 139 | 128 | 92  | 84  | 72  | 55  |
| 57  | 50  | 43  | 121 | 148 | 146 | 199 | 161 | 158 | 103 |
| 37  | 36  | 32  | 192 | 250 | 202 | 219 | 211 | 205 | 85  |
| 81  | 75  | 76  | 296 | 420 | 367 | 438 | 403 | 439 | 186 |
| 30  | 27  | 42  | 131 | 166 | 143 | 69  | 83  | 78  | 46  |

|     |     |     |     |     |     |     |     |     |     |
|-----|-----|-----|-----|-----|-----|-----|-----|-----|-----|
| 31  | 40  | 46  | 119 | 131 | 121 | 78  | 64  | 79  | 67  |
| 42  | 36  | 42  | 55  | 59  | 58  | 48  | 39  | 47  | 23  |
| 24  | 12  | 26  | 23  | 27  | 29  | 23  | 24  | 28  | 20  |
| 52  | 39  | 36  | 87  | 117 | 96  | 103 | 99  | 93  | 50  |
| 15  | 19  | 23  | 98  | 120 | 108 | 86  | 65  | 75  | 38  |
| 43  | 28  | 40  | 66  | 90  | 90  | 76  | 73  | 96  | 43  |
| 75  | 73  | 88  | 197 | 225 | 182 | 171 | 151 | 203 | 95  |
| 53  | 69  | 64  | 118 | 173 | 124 | 176 | 126 | 134 | 63  |
| 59  | 60  | 58  | 131 | 166 | 134 | 86  | 87  | 85  | 62  |
| 39  | 61  | 58  | 68  | 98  | 82  | 79  | 66  | 75  | 45  |
| 34  | 28  | 31  | 118 | 148 | 113 | 112 | 80  | 84  | 41  |
| 49  | 56  | 58  | 70  | 91  | 102 | 84  | 80  | 78  | 65  |
| 117 | 130 | 164 | 135 | 169 | 155 | 195 | 143 | 210 | 147 |
| 31  | 41  | 36  | 59  | 99  | 58  | 77  | 57  | 73  | 38  |
| 59  | 65  | 72  | 41  | 39  | 36  | 36  | 48  | 40  | 60  |
| 70  | 64  | 83  | 107 | 96  | 92  | 100 | 99  | 120 | 65  |
| 92  | 81  | 90  | 73  | 71  | 65  | 58  | 49  | 72  | 81  |
| 53  | 59  | 65  | 72  | 113 | 83  | 109 | 102 | 135 | 61  |
| 39  | 51  | 49  | 142 | 142 | 115 | 215 | 189 | 206 | 89  |
| 42  | 44  | 44  | 44  | 39  | 28  | 41  | 36  | 39  | 35  |
| 33  | 39  | 42  | 48  | 70  | 71  | 54  | 45  | 50  | 45  |
| 49  | 34  | 62  | 26  | 33  | 32  | 29  | 33  | 42  | 43  |
| 68  | 83  | 82  | 85  | 114 | 104 | 112 | 98  | 113 | 100 |
| 50  | 50  | 57  | 104 | 131 | 91  | 124 | 104 | 126 | 53  |
| 33  | 49  | 52  | 37  | 64  | 42  | 55  | 41  | 59  | 31  |
| 27  | 26  | 38  | 129 | 147 | 128 | 109 | 89  | 88  | 45  |
| 61  | 54  | 73  | 113 | 141 | 141 | 159 | 141 | 162 | 82  |
| 36  | 48  | 45  | 171 | 258 | 208 | 182 | 169 | 187 | 85  |
| 52  | 54  | 53  | 141 | 210 | 159 | 156 | 144 | 158 | 71  |
| 76  | 86  | 91  | 273 | 369 | 289 | 379 | 356 | 406 | 173 |
| 75  | 99  | 82  | 297 | 371 | 344 | 201 | 176 | 190 | 111 |
| 42  | 53  | 29  | 171 | 219 | 158 | 176 | 156 | 181 | 82  |
| 39  | 37  | 63  | 221 | 257 | 237 | 145 | 180 | 187 | 89  |
| 45  | 46  | 43  | 147 | 217 | 157 | 176 | 143 | 148 | 59  |
| 12  | 13  | 15  | 37  | 51  | 59  | 65  | 53  | 58  | 18  |
| 56  | 56  | 53  | 103 | 103 | 102 | 110 | 100 | 125 | 55  |
| 7   | 8   | 7   | 5   | 7   | 10  | 9   | 9   | 10  | 9   |
| 37  | 41  | 33  | 77  | 99  | 95  | 82  | 55  | 79  | 36  |
| 6   | 7   | 3   | 25  | 28  | 32  | 24  | 31  | 33  | 10  |
| 28  | 28  | 32  | 32  | 26  | 37  | 41  | 24  | 41  | 29  |
| 26  | 22  | 38  | 35  | 67  | 62  | 71  | 52  | 64  | 33  |

|     |     |     |     |     |     |     |     |     |     |
|-----|-----|-----|-----|-----|-----|-----|-----|-----|-----|
| 15  | 14  | 24  | 26  | 39  | 35  | 40  | 37  | 44  | 26  |
| 56  | 71  | 63  | 101 | 154 | 128 | 132 | 134 | 127 | 75  |
| 47  | 67  | 68  | 72  | 74  | 62  | 83  | 77  | 102 | 60  |
| 62  | 63  | 73  | 49  | 61  | 33  | 29  | 28  | 41  | 36  |
| 54  | 42  | 58  | 133 | 154 | 146 | 120 | 94  | 124 | 66  |
| 48  | 34  | 45  | 78  | 103 | 89  | 45  | 48  | 48  | 34  |
| 41  | 44  | 37  | 40  | 52  | 45  | 32  | 28  | 35  | 36  |
| 46  | 60  | 65  | 98  | 117 | 94  | 90  | 74  | 69  | 62  |
| 36  | 30  | 33  | 54  | 60  | 71  | 41  | 52  | 54  | 32  |
| 43  | 44  | 34  | 71  | 91  | 84  | 77  | 85  | 98  | 43  |
| 25  | 14  | 36  | 26  | 37  | 35  | 39  | 37  | 42  | 23  |
| 74  | 89  | 93  | 64  | 100 | 77  | 93  | 85  | 101 | 76  |
| 35  | 33  | 35  | 152 | 197 | 163 | 127 | 122 | 127 | 69  |
| 15  | 9   | 18  | 8   | 18  | 9   | 10  | 13  | 12  | 12  |
| 29  | 42  | 25  | 28  | 29  | 34  | 28  | 27  | 29  | 41  |
| 74  | 66  | 83  | 149 | 190 | 197 | 298 | 268 | 301 | 126 |
| 43  | 37  | 36  | 14  | 23  | 20  | 18  | 17  | 17  | 13  |
| 37  | 55  | 34  | 75  | 77  | 75  | 70  | 78  | 77  | 45  |
| 67  | 63  | 73  | 113 | 147 | 110 | 98  | 96  | 113 | 54  |
| 69  | 71  | 81  | 257 | 349 | 308 | 499 | 491 | 499 | 239 |
| 19  | 14  | 14  | 20  | 20  | 18  | 29  | 30  | 30  | 14  |
| 48  | 41  | 47  | 97  | 128 | 96  | 92  | 67  | 85  | 52  |
| 38  | 47  | 36  | 73  | 103 | 107 | 133 | 111 | 133 | 56  |
| 32  | 21  | 32  | 56  | 80  | 47  | 78  | 58  | 70  | 43  |
| 49  | 43  | 58  | 45  | 84  | 64  | 113 | 107 | 103 | 57  |
| 100 | 84  | 88  | 101 | 134 | 117 | 141 | 144 | 150 | 67  |
| 62  | 76  | 60  | 175 | 249 | 209 | 263 | 257 | 299 | 140 |
| 16  | 27  | 32  | 79  | 94  | 94  | 84  | 85  | 73  | 52  |
| 22  | 35  | 25  | 41  | 59  | 47  | 35  | 58  | 37  | 34  |
| 28  | 27  | 36  | 73  | 98  | 71  | 81  | 90  | 89  | 39  |
| 173 | 188 | 186 | 146 | 188 | 162 | 274 | 206 | 277 | 180 |
| 43  | 30  | 50  | 85  | 103 | 78  | 55  | 48  | 64  | 46  |
| 63  | 58  | 56  | 146 | 208 | 157 | 178 | 171 | 190 | 83  |
| 46  | 52  | 53  | 123 | 147 | 149 | 180 | 179 | 172 | 87  |
| 26  | 19  | 24  | 85  | 130 | 88  | 125 | 109 | 139 | 50  |
| 81  | 64  | 81  | 102 | 127 | 103 | 100 | 95  | 108 | 76  |
| 45  | 38  | 48  | 101 | 136 | 112 | 119 | 114 | 112 | 51  |
| 50  | 48  | 55  | 46  | 73  | 76  | 83  | 65  | 83  | 50  |
| 31  | 33  | 32  | 99  | 107 | 115 | 147 | 120 | 141 | 56  |
| 47  | 54  | 66  | 75  | 87  | 88  | 106 | 84  | 90  | 53  |
| 47  | 39  | 44  | 53  | 58  | 63  | 64  | 56  | 48  | 40  |



|     |     |    |     |     |     |     |     |     |     |
|-----|-----|----|-----|-----|-----|-----|-----|-----|-----|
| 45  | 42  | 46 | 252 | 297 | 265 | 315 | 288 | 307 | 149 |
| 35  | 36  | 44 | 160 | 179 | 162 | 191 | 190 | 184 | 88  |
| 49  | 44  | 49 | 63  | 73  | 81  | 75  | 68  | 91  | 48  |
| 52  | 62  | 58 | 54  | 44  | 55  | 57  | 58  | 63  | 51  |
| 56  | 39  | 39 | 57  | 67  | 64  | 69  | 70  | 63  | 48  |
| 38  | 43  | 33 | 46  | 66  | 60  | 71  | 53  | 49  | 48  |
| 49  | 48  | 55 | 70  | 84  | 79  | 122 | 129 | 105 | 93  |
| 61  | 53  | 48 | 67  | 96  | 80  | 87  | 82  | 96  | 65  |
| 32  | 38  | 37 | 72  | 82  | 76  | 66  | 84  | 60  | 45  |
| 88  | 92  | 92 | 230 | 307 | 261 | 344 | 297 | 318 | 145 |
| 71  | 89  | 90 | 239 | 324 | 267 | 320 | 267 | 284 | 153 |
| 51  | 57  | 61 | 86  | 98  | 87  | 125 | 104 | 118 | 64  |
| 56  | 46  | 55 | 117 | 140 | 115 | 99  | 110 | 133 | 56  |
| 57  | 41  | 49 | 104 | 127 | 111 | 82  | 96  | 96  | 50  |
| 26  | 20  | 30 | 52  | 80  | 42  | 51  | 33  | 34  | 24  |
| 43  | 43  | 47 | 184 | 193 | 209 | 197 | 174 | 178 | 85  |
| 54  | 48  | 66 | 93  | 118 | 104 | 130 | 120 | 130 | 68  |
| 24  | 32  | 37 | 108 | 168 | 131 | 118 | 117 | 119 | 50  |
| 54  | 52  | 61 | 208 | 255 | 247 | 243 | 203 | 260 | 97  |
| 13  | 10  | 8  | 6   | 8   | 6   | 11  | 4   | 8   | 11  |
| 25  | 36  | 26 | 127 | 134 | 112 | 156 | 161 | 164 | 84  |
| 47  | 41  | 54 | 81  | 82  | 76  | 69  | 82  | 75  | 53  |
| 38  | 53  | 39 | 61  | 105 | 88  | 67  | 57  | 80  | 43  |
| 71  | 56  | 98 | 84  | 104 | 87  | 74  | 94  | 92  | 68  |
| 20  | 36  | 38 | 58  | 59  | 60  | 63  | 55  | 59  | 41  |
| 66  | 65  | 57 | 86  | 88  | 78  | 59  | 68  | 69  | 56  |
| 14  | 15  | 20 | 13  | 15  | 14  | 18  | 15  | 16  | 7   |
| 37  | 33  | 42 | 49  | 69  | 54  | 48  | 48  | 58  | 46  |
| 44  | 35  | 42 | 59  | 72  | 78  | 71  | 55  | 66  | 42  |
| 90  | 68  | 95 | 65  | 64  | 72  | 111 | 95  | 105 | 73  |
| 14  | 13  | 13 | 6   | 11  | 11  | 15  | 11  | 6   | 10  |
| 55  | 34  | 47 | 21  | 30  | 23  | 35  | 26  | 35  | 39  |
| 127 | 110 | 88 | 166 | 180 | 156 | 239 | 246 | 247 | 128 |
| 28  | 22  | 18 | 19  | 37  | 46  | 25  | 42  | 19  | 24  |
| 39  | 28  | 45 | 101 | 124 | 103 | 77  | 69  | 88  | 46  |
| 35  | 32  | 22 | 64  | 91  | 65  | 53  | 49  | 41  | 27  |
| 38  | 51  | 43 | 38  | 48  | 52  | 61  | 60  | 45  | 44  |
| 39  | 34  | 30 | 48  | 44  | 48  | 41  | 41  | 54  | 30  |
| 23  | 30  | 21 | 27  | 56  | 40  | 40  | 47  | 45  | 22  |
| 30  | 37  | 33 | 32  | 27  | 33  | 35  | 30  | 43  | 19  |
| 32  | 32  | 25 | 31  | 34  | 24  | 30  | 13  | 31  | 23  |

|     |     |     |     |     |     |     |     |     |     |
|-----|-----|-----|-----|-----|-----|-----|-----|-----|-----|
| 24  | 21  | 22  | 69  | 99  | 87  | 57  | 65  | 55  | 40  |
| 10  | 11  | 7   | 13  | 22  | 30  | 12  | 10  | 10  | 11  |
| 46  | 43  | 41  | 41  | 71  | 68  | 63  | 47  | 64  | 37  |
| 75  | 93  | 80  | 295 | 350 | 261 | 432 | 339 | 391 | 188 |
| 77  | 64  | 71  | 75  | 90  | 77  | 64  | 54  | 64  | 46  |
| 36  | 51  | 40  | 148 | 162 | 175 | 166 | 146 | 185 | 71  |
| 67  | 61  | 68  | 79  | 100 | 93  | 91  | 102 | 92  | 45  |
| 61  | 48  | 53  | 91  | 102 | 92  | 91  | 77  | 73  | 58  |
| 46  | 48  | 52  | 53  | 63  | 66  | 60  | 26  | 47  | 31  |
| 16  | 13  | 18  | 18  | 23  | 25  | 22  | 21  | 21  | 16  |
| 26  | 23  | 30  | 30  | 50  | 48  | 29  | 45  | 40  | 18  |
| 31  | 31  | 27  | 36  | 58  | 48  | 70  | 47  | 71  | 53  |
| 38  | 40  | 50  | 46  | 54  | 46  | 44  | 58  | 47  | 37  |
| 37  | 35  | 37  | 155 | 188 | 145 | 134 | 149 | 145 | 63  |
| 28  | 19  | 31  | 33  | 32  | 37  | 38  | 37  | 34  | 21  |
| 25  | 23  | 18  | 83  | 95  | 89  | 95  | 100 | 118 | 50  |
| 1   | 10  | 6   | 9   | 10  | 5   | 10  | 8   | 18  | 11  |
| 23  | 26  | 40  | 73  | 116 | 98  | 91  | 88  | 93  | 51  |
| 27  | 28  | 33  | 63  | 79  | 77  | 83  | 55  | 74  | 47  |
| 23  | 38  | 32  | 69  | 69  | 69  | 55  | 72  | 83  | 54  |
| 46  | 50  | 43  | 39  | 50  | 39  | 62  | 64  | 64  | 38  |
| 58  | 66  | 75  | 121 | 173 | 123 | 184 | 181 | 140 | 100 |
| 31  | 25  | 34  | 54  | 65  | 54  | 41  | 39  | 57  | 37  |
| 132 | 137 | 139 | 139 | 188 | 123 | 144 | 127 | 133 | 140 |
| 142 | 149 | 218 | 263 | 315 | 310 | 236 | 188 | 218 | 172 |
| 50  | 39  | 66  | 94  | 120 | 105 | 114 | 92  | 120 | 76  |
| 94  | 62  | 88  | 100 | 101 | 106 | 93  | 116 | 99  | 69  |
| 48  | 55  | 62  | 86  | 82  | 93  | 91  | 73  | 98  | 61  |
| 43  | 35  | 50  | 57  | 95  | 68  | 98  | 66  | 80  | 38  |
| 37  | 51  | 44  | 63  | 76  | 64  | 90  | 62  | 75  | 43  |
| 24  | 32  | 33  | 44  | 56  | 70  | 46  | 43  | 46  | 25  |
| 31  | 43  | 44  | 36  | 43  | 39  | 56  | 56  | 60  | 44  |
| 26  | 30  | 37  | 97  | 134 | 130 | 124 | 120 | 129 | 65  |
| 21  | 23  | 31  | 22  | 34  | 30  | 39  | 31  | 36  | 27  |
| 66  | 58  | 68  | 203 | 280 | 191 | 283 | 271 | 347 | 152 |
| 23  | 22  | 31  | 48  | 80  | 59  | 71  | 82  | 61  | 51  |
| 60  | 47  | 68  | 77  | 84  | 99  | 116 | 100 | 112 | 66  |
| 42  | 48  | 49  | 37  | 33  | 33  | 40  | 36  | 46  | 38  |
| 46  | 55  | 70  | 127 | 170 | 124 | 160 | 132 | 153 | 91  |
| 51  | 57  | 37  | 105 | 113 | 84  | 91  | 112 | 90  | 74  |
| 44  | 34  | 47  | 72  | 70  | 77  | 70  | 67  | 74  | 43  |

|     |     |     |     |     |     |     |     |     |     |
|-----|-----|-----|-----|-----|-----|-----|-----|-----|-----|
| 42  | 30  | 42  | 43  | 46  | 28  | 42  | 32  | 35  | 19  |
| 50  | 64  | 81  | 83  | 91  | 77  | 97  | 71  | 93  | 68  |
| 24  | 25  | 40  | 29  | 33  | 45  | 34  | 33  | 38  | 26  |
| 42  | 68  | 55  | 166 | 215 | 183 | 200 | 184 | 214 | 93  |
| 109 | 88  | 121 | 76  | 106 | 96  | 92  | 80  | 87  | 40  |
| 50  | 54  | 46  | 117 | 151 | 107 | 125 | 117 | 119 | 51  |
| 87  | 101 | 105 | 81  | 114 | 82  | 125 | 148 | 154 | 88  |
| 49  | 42  | 59  | 60  | 102 | 53  | 108 | 115 | 130 | 62  |
| 153 | 139 | 144 | 147 | 205 | 181 | 302 | 257 | 266 | 168 |
| 86  | 65  | 84  | 108 | 124 | 104 | 158 | 166 | 182 | 110 |
| 21  | 13  | 24  | 22  | 40  | 38  | 32  | 22  | 30  | 26  |
| 67  | 71  | 85  | 207 | 251 | 223 | 306 | 260 | 247 | 131 |
| 56  | 65  | 68  | 227 | 229 | 232 | 349 | 288 | 291 | 169 |
| 57  | 65  | 54  | 105 | 130 | 104 | 99  | 86  | 109 | 65  |
| 51  | 39  | 43  | 71  | 105 | 89  | 80  | 88  | 88  | 54  |
| 75  | 126 | 113 | 155 | 213 | 170 | 159 | 135 | 159 | 93  |
| 86  | 117 | 93  | 235 | 284 | 258 | 236 | 247 | 288 | 152 |
| 73  | 62  | 70  | 143 | 148 | 130 | 152 | 165 | 141 | 96  |
| 164 | 171 | 181 | 143 | 200 | 191 | 214 | 227 | 238 | 172 |
| 98  | 91  | 104 | 221 | 282 | 282 | 335 | 282 | 303 | 156 |
| 68  | 61  | 79  | 119 | 136 | 112 | 165 | 125 | 128 | 68  |
| 65  | 43  | 55  | 179 | 238 | 182 | 219 | 193 | 245 | 97  |
| 58  | 56  | 49  | 193 | 250 | 201 | 262 | 245 | 254 | 122 |
| 82  | 72  | 103 | 255 | 254 | 272 | 303 | 314 | 324 | 141 |
| 73  | 71  | 67  | 303 | 424 | 408 | 530 | 519 | 532 | 242 |
| 59  | 57  | 69  | 126 | 150 | 133 | 173 | 172 | 180 | 83  |
| 51  | 69  | 66  | 124 | 148 | 150 | 179 | 185 | 213 | 99  |
| 26  | 28  | 29  | 58  | 63  | 68  | 85  | 93  | 89  | 41  |
| 73  | 75  | 101 | 354 | 456 | 354 | 666 | 548 | 612 | 316 |
| 58  | 59  | 62  | 200 | 271 | 162 | 315 | 260 | 280 | 95  |
| 43  | 51  | 47  | 38  | 53  | 49  | 55  | 45  | 60  | 39  |
| 35  | 44  | 38  | 63  | 77  | 57  | 45  | 52  | 55  | 25  |
| 55  | 52  | 43  | 114 | 128 | 121 | 103 | 97  | 101 | 69  |
| 41  | 46  | 29  | 75  | 89  | 66  | 63  | 59  | 71  | 40  |
| 35  | 42  | 61  | 133 | 149 | 111 | 77  | 47  | 63  | 54  |
| 27  | 24  | 26  | 26  | 51  | 33  | 52  | 30  | 36  | 30  |
| 54  | 55  | 36  | 167 | 203 | 194 | 149 | 129 | 157 | 75  |
| 56  | 49  | 59  | 71  | 114 | 97  | 68  | 54  | 71  | 44  |
| 68  | 61  | 64  | 122 | 140 | 151 | 108 | 109 | 103 | 75  |
| 19  | 38  | 34  | 69  | 82  | 70  | 56  | 53  | 52  | 53  |
| 54  | 53  | 45  | 183 | 245 | 187 | 173 | 117 | 177 | 83  |

|    |    |    |     |     |     |     |     |     |     |
|----|----|----|-----|-----|-----|-----|-----|-----|-----|
| 11 | 6  | 8  | 76  | 99  | 75  | 53  | 33  | 35  | 15  |
| 79 | 60 | 95 | 73  | 119 | 109 | 90  | 101 | 96  | 55  |
| 32 | 43 | 48 | 111 | 129 | 112 | 91  | 90  | 103 | 56  |
| 37 | 41 | 42 | 53  | 64  | 46  | 52  | 55  | 54  | 28  |
| 45 | 38 | 44 | 51  | 57  | 74  | 65  | 67  | 72  | 37  |
| 45 | 53 | 47 | 109 | 125 | 108 | 132 | 97  | 108 | 58  |
| 17 | 29 | 44 | 76  | 98  | 73  | 63  | 81  | 76  | 36  |
| 42 | 39 | 34 | 65  | 108 | 82  | 86  | 79  | 78  | 43  |
| 24 | 38 | 26 | 61  | 70  | 52  | 34  | 36  | 47  | 20  |
| 41 | 57 | 64 | 162 | 205 | 157 | 115 | 102 | 101 | 62  |
| 51 | 36 | 57 | 458 | 562 | 457 | 560 | 417 | 496 | 219 |
| 48 | 64 | 58 | 126 | 178 | 139 | 203 | 199 | 215 | 102 |
| 88 | 70 | 89 | 151 | 198 | 185 | 155 | 158 | 139 | 75  |
| 3  | 6  | 6  | 25  | 38  | 27  | 20  | 31  | 30  | 20  |
| 39 | 58 | 57 | 188 | 275 | 210 | 301 | 272 | 295 | 119 |
| 36 | 41 | 48 | 90  | 152 | 113 | 138 | 107 | 110 | 60  |
| 40 | 29 | 43 | 75  | 77  | 90  | 138 | 130 | 138 | 62  |
| 51 | 54 | 50 | 242 | 320 | 254 | 274 | 242 | 276 | 117 |
| 11 | 10 | 14 | 22  | 49  | 40  | 43  | 44  | 43  | 29  |
| 36 | 46 | 38 | 46  | 62  | 39  | 65  | 72  | 67  | 41  |
| 90 | 88 | 84 | 177 | 212 | 178 | 240 | 207 | 226 | 127 |
| 43 | 43 | 44 | 47  | 79  | 79  | 81  | 49  | 66  | 32  |
| 58 | 61 | 59 | 102 | 94  | 100 | 107 | 109 | 119 | 48  |
| 36 | 40 | 43 | 52  | 46  | 45  | 76  | 74  | 51  | 40  |
| 62 | 60 | 58 | 89  | 112 | 98  | 150 | 126 | 133 | 71  |
| 71 | 55 | 46 | 93  | 135 | 110 | 120 | 91  | 120 | 64  |
| 64 | 71 | 79 | 197 | 252 | 210 | 352 | 304 | 354 | 152 |
| 26 | 35 | 24 | 38  | 47  | 39  | 48  | 48  | 48  | 28  |
| 57 | 72 | 80 | 179 | 252 | 201 | 282 | 271 | 289 | 135 |
| 57 | 50 | 61 | 139 | 156 | 150 | 243 | 189 | 223 | 107 |
| 66 | 57 | 69 | 95  | 126 | 114 | 121 | 133 | 135 | 71  |
| 41 | 50 | 52 | 73  | 80  | 71  | 90  | 68  | 90  | 49  |
| 47 | 53 | 51 | 173 | 188 | 151 | 281 | 246 | 294 | 104 |
| 33 | 29 | 34 | 47  | 93  | 79  | 102 | 91  | 78  | 43  |
| 20 | 18 | 24 | 21  | 22  | 20  | 30  | 17  | 22  | 11  |
| 28 | 28 | 45 | 117 | 136 | 132 | 116 | 116 | 144 | 70  |
| 31 | 30 | 37 | 44  | 78  | 60  | 80  | 63  | 68  | 41  |
| 43 | 34 | 31 | 142 | 178 | 139 | 179 | 178 | 194 | 76  |
| 43 | 41 | 64 | 421 | 511 | 443 | 341 | 304 | 330 | 140 |
| 19 | 33 | 35 | 69  | 103 | 68  | 48  | 41  | 60  | 21  |
| 33 | 44 | 37 | 59  | 78  | 87  | 78  | 51  | 57  | 45  |

|    |    |    |     |     |     |     |     |     |     |
|----|----|----|-----|-----|-----|-----|-----|-----|-----|
| 47 | 45 | 42 | 137 | 170 | 180 | 117 | 97  | 94  | 59  |
| 4  | 6  | 9  | 24  | 32  | 22  | 10  | 12  | 14  | 8   |
| 30 | 28 | 36 | 88  | 135 | 135 | 62  | 62  | 55  | 43  |
| 46 | 49 | 39 | 93  | 114 | 90  | 81  | 87  | 70  | 50  |
| 46 | 43 | 44 | 51  | 56  | 48  | 77  | 60  | 60  | 56  |
| 35 | 44 | 51 | 65  | 72  | 46  | 92  | 82  | 97  | 35  |
| 10 | 19 | 23 | 26  | 35  | 36  | 34  | 25  | 36  | 21  |
| 54 | 56 | 84 | 65  | 105 | 102 | 78  | 94  | 112 | 74  |
| 65 | 54 | 55 | 67  | 74  | 75  | 76  | 44  | 72  | 34  |
| 46 | 34 | 49 | 165 | 229 | 178 | 129 | 115 | 126 | 67  |
| 10 | 15 | 18 | 30  | 34  | 29  | 23  | 34  | 21  | 17  |
| 36 | 41 | 31 | 56  | 80  | 75  | 69  | 65  | 82  | 30  |
| 28 | 30 | 30 | 48  | 67  | 44  | 33  | 33  | 41  | 22  |
| 24 | 24 | 20 | 154 | 205 | 170 | 147 | 103 | 124 | 94  |
| 39 | 34 | 48 | 50  | 52  | 49  | 55  | 42  | 43  | 37  |
| 90 | 79 | 92 | 569 | 774 | 736 | 734 | 619 | 715 | 320 |
| 9  | 16 | 15 | 6   | 11  | 7   | 8   | 6   | 14  | 10  |
| 56 | 46 | 65 | 65  | 85  | 76  | 69  | 62  | 56  | 60  |
| 40 | 46 | 41 | 39  | 39  | 31  | 26  | 30  | 35  | 29  |
| 56 | 60 | 61 | 50  | 45  | 50  | 58  | 68  | 65  | 33  |
| 73 | 63 | 55 | 124 | 160 | 126 | 142 | 167 | 128 | 87  |
| 71 | 72 | 80 | 109 | 125 | 114 | 151 | 133 | 143 | 81  |
| 47 | 79 | 86 | 88  | 93  | 116 | 130 | 127 | 150 | 79  |
| 56 | 42 | 78 | 46  | 83  | 53  | 61  | 63  | 69  | 50  |
| 47 | 64 | 45 | 18  | 38  | 42  | 33  | 46  | 54  | 45  |
| 55 | 55 | 63 | 147 | 155 | 165 | 152 | 140 | 163 | 69  |
| 52 | 38 | 58 | 66  | 103 | 93  | 95  | 124 | 134 | 60  |
| 53 | 46 | 45 | 134 | 189 | 175 | 162 | 122 | 156 | 78  |
| 58 | 67 | 63 | 58  | 82  | 86  | 114 | 112 | 111 | 88  |
| 50 | 55 | 59 | 76  | 95  | 78  | 114 | 131 | 130 | 74  |
| 36 | 66 | 59 | 162 | 207 | 170 | 133 | 99  | 113 | 64  |
| 63 | 49 | 82 | 132 | 139 | 152 | 138 | 126 | 117 | 96  |
| 57 | 53 | 54 | 111 | 168 | 163 | 152 | 156 | 158 | 89  |
| 52 | 76 | 63 | 158 | 161 | 168 | 175 | 153 | 183 | 93  |
| 48 | 60 | 48 | 161 | 179 | 154 | 170 | 171 | 196 | 105 |
| 94 | 95 | 95 | 150 | 215 | 167 | 211 | 232 | 270 | 133 |
| 57 | 36 | 48 | 161 | 170 | 186 | 154 | 126 | 127 | 78  |
| 43 | 42 | 39 | 222 | 307 | 285 | 214 | 214 | 244 | 132 |
| 19 | 26 | 28 | 56  | 54  | 84  | 54  | 59  | 63  | 29  |
| 39 | 33 | 46 | 299 | 402 | 318 | 408 | 379 | 431 | 208 |
| 38 | 40 | 50 | 308 | 356 | 343 | 407 | 446 | 475 | 174 |

|     |     |     |     |     |     |      |     |     |     |
|-----|-----|-----|-----|-----|-----|------|-----|-----|-----|
| 152 | 128 | 168 | 626 | 826 | 688 | 1051 | 832 | 982 | 589 |
| 34  | 26  | 30  | 87  | 112 | 117 | 109  | 139 | 144 | 66  |
| 103 | 92  | 101 | 180 | 225 | 172 | 257  | 210 | 218 | 115 |
| 54  | 50  | 70  | 215 | 239 | 206 | 231  | 163 | 201 | 93  |
| 63  | 68  | 67  | 121 | 156 | 166 | 168  | 140 | 155 | 76  |
| 89  | 72  | 83  | 62  | 95  | 66  | 76   | 76  | 96  | 60  |
| 80  | 88  | 75  | 112 | 143 | 127 | 125  | 100 | 114 | 72  |
| 30  | 26  | 35  | 40  | 36  | 36  | 42   | 28  | 40  | 36  |
| 18  | 17  | 23  | 18  | 25  | 25  | 23   | 32  | 17  | 21  |
| 23  | 25  | 28  | 29  | 48  | 38  | 23   | 16  | 22  | 21  |
| 59  | 45  | 72  | 64  | 82  | 77  | 66   | 77  | 81  | 40  |
| 38  | 44  | 40  | 38  | 64  | 42  | 60   | 62  | 48  | 46  |
| 47  | 38  | 50  | 40  | 66  | 53  | 53   | 51  | 47  | 49  |
| 41  | 46  | 42  | 73  | 94  | 74  | 104  | 83  | 88  | 56  |
| 64  | 58  | 73  | 123 | 108 | 95  | 159  | 157 | 153 | 64  |
| 71  | 74  | 91  | 45  | 58  | 56  | 64   | 55  | 69  | 57  |
| 42  | 28  | 47  | 53  | 55  | 49  | 56   | 52  | 58  | 44  |
| 35  | 38  | 41  | 47  | 54  | 52  | 51   | 40  | 48  | 37  |
| 39  | 41  | 46  | 58  | 96  | 64  | 56   | 53  | 55  | 51  |
| 49  | 62  | 72  | 54  | 64  | 51  | 58   | 52  | 74  | 52  |
| 49  | 43  | 49  | 29  | 34  | 30  | 39   | 30  | 38  | 28  |
| 36  | 41  | 48  | 54  | 80  | 59  | 65   | 65  | 68  | 48  |
| 44  | 49  | 57  | 66  | 76  | 72  | 78   | 71  | 82  | 75  |
| 56  | 48  | 60  | 34  | 36  | 42  | 44   | 33  | 46  | 38  |
| 51  | 50  | 70  | 336 | 420 | 327 | 258  | 197 | 277 | 105 |
| 44  | 47  | 38  | 55  | 61  | 49  | 48   | 53  | 58  | 48  |
| 38  | 34  | 43  | 31  | 49  | 30  | 36   | 43  | 29  | 38  |
| 20  | 15  | 23  | 33  | 41  | 39  | 45   | 49  | 40  | 28  |
| 21  | 31  | 32  | 37  | 50  | 40  | 35   | 42  | 48  | 29  |
| 67  | 60  | 56  | 76  | 78  | 94  | 85   | 99  | 86  | 58  |
| 55  | 38  | 58  | 48  | 61  | 45  | 53   | 47  | 43  | 52  |
| 83  | 73  | 76  | 80  | 109 | 131 | 125  | 136 | 130 | 81  |
| 31  | 50  | 33  | 79  | 122 | 98  | 91   | 102 | 92  | 41  |
| 20  | 20  | 34  | 45  | 57  | 62  | 50   | 45  | 42  | 32  |
| 56  | 49  | 41  | 136 | 194 | 141 | 126  | 119 | 94  | 56  |
| 30  | 30  | 21  | 41  | 45  | 48  | 48   | 43  | 38  | 25  |
| 51  | 46  | 49  | 91  | 68  | 92  | 87   | 67  | 69  | 38  |
| 45  | 61  | 44  | 83  | 114 | 100 | 97   | 69  | 70  | 63  |
| 15  | 15  | 5   | 15  | 28  | 34  | 22   | 20  | 31  | 16  |
| 42  | 34  | 48  | 48  | 55  | 63  | 52   | 67  | 57  | 43  |
| 26  | 16  | 17  | 32  | 25  | 17  | 9    | 11  | 15  | 15  |

|     |     |     |     |     |     |     |     |     |     |
|-----|-----|-----|-----|-----|-----|-----|-----|-----|-----|
| 28  | 28  | 39  | 21  | 25  | 22  | 16  | 7   | 20  | 25  |
| 51  | 43  | 60  | 68  | 83  | 74  | 76  | 81  | 88  | 67  |
| 34  | 30  | 49  | 25  | 36  | 27  | 27  | 28  | 35  | 24  |
| 57  | 52  | 74  | 115 | 142 | 142 | 155 | 174 | 131 | 89  |
| 15  | 14  | 20  | 38  | 29  | 38  | 30  | 28  | 20  | 12  |
| 26  | 30  | 22  | 30  | 45  | 39  | 49  | 32  | 47  | 31  |
| 51  | 45  | 41  | 42  | 67  | 50  | 63  | 73  | 79  | 40  |
| 38  | 17  | 20  | 19  | 30  | 43  | 32  | 29  | 30  | 23  |
| 13  | 14  | 18  | 15  | 8   | 11  | 8   | 7   | 9   | 8   |
| 54  | 37  | 60  | 86  | 98  | 95  | 110 | 79  | 106 | 45  |
| 41  | 32  | 26  | 42  | 63  | 51  | 34  | 36  | 30  | 36  |
| 16  | 18  | 19  | 30  | 37  | 27  | 20  | 23  | 20  | 12  |
| 29  | 16  | 11  | 68  | 78  | 65  | 62  | 40  | 53  | 26  |
| 16  | 28  | 23  | 41  | 36  | 49  | 39  | 46  | 34  | 32  |
| 73  | 84  | 72  | 102 | 142 | 122 | 105 | 95  | 98  | 69  |
| 47  | 35  | 43  | 61  | 77  | 71  | 43  | 49  | 44  | 39  |
| 46  | 63  | 70  | 95  | 119 | 124 | 86  | 82  | 110 | 56  |
| 52  | 45  | 70  | 87  | 110 | 93  | 91  | 81  | 84  | 77  |
| 45  | 63  | 56  | 56  | 98  | 97  | 75  | 77  | 89  | 67  |
| 39  | 48  | 52  | 73  | 76  | 78  | 129 | 95  | 90  | 54  |
| 61  | 66  | 61  | 80  | 92  | 94  | 85  | 89  | 85  | 72  |
| 38  | 39  | 30  | 25  | 41  | 44  | 38  | 33  | 26  | 34  |
| 8   | 7   | 8   | 6   | 5   | 5   | 1   | 11  | 6   | 5   |
| 22  | 29  | 41  | 33  | 30  | 36  | 31  | 33  | 37  | 31  |
| 23  | 35  | 15  | 21  | 23  | 14  | 20  | 16  | 19  | 25  |
| 7   | 9   | 9   | 3   | 3   | 2   | 3   | 6   | 3   | 5   |
| 15  | 12  | 19  | 17  | 10  | 10  | 18  | 14  | 10  | 14  |
| 85  | 88  | 84  | 63  | 71  | 70  | 69  | 48  | 62  | 56  |
| 54  | 55  | 63  | 32  | 48  | 40  | 45  | 36  | 48  | 38  |
| 86  | 67  | 75  | 72  | 83  | 83  | 73  | 76  | 61  | 64  |
| 79  | 76  | 69  | 53  | 62  | 62  | 66  | 42  | 72  | 50  |
| 105 | 95  | 105 | 83  | 114 | 99  | 139 | 129 | 162 | 114 |
| 8   | 11  | 2   | 4   | 5   | 4   | 3   | 3   | 9   | 6   |
| 32  | 21  | 41  | 15  | 28  | 14  | 14  | 17  | 25  | 18  |
| 65  | 57  | 85  | 116 | 156 | 140 | 135 | 132 | 131 | 86  |
| 68  | 86  | 68  | 126 | 159 | 135 | 129 | 100 | 113 | 74  |
| 49  | 67  | 78  | 109 | 99  | 111 | 63  | 73  | 52  | 56  |
| 91  | 78  | 72  | 105 | 131 | 133 | 95  | 71  | 96  | 61  |
| 105 | 114 | 114 | 74  | 107 | 110 | 96  | 88  | 100 | 82  |
| 28  | 18  | 27  | 30  | 42  | 36  | 25  | 34  | 27  | 16  |
| 54  | 61  | 57  | 50  | 55  | 51  | 42  | 47  | 49  | 51  |

|     |    |     |     |     |     |     |     |     |     |
|-----|----|-----|-----|-----|-----|-----|-----|-----|-----|
| 29  | 32 | 27  | 22  | 20  | 23  | 23  | 21  | 29  | 24  |
| 24  | 37 | 30  | 37  | 42  | 29  | 44  | 44  | 39  | 42  |
| 22  | 32 | 26  | 27  | 26  | 42  | 44  | 29  | 46  | 19  |
| 56  | 68 | 79  | 38  | 54  | 36  | 70  | 62  | 79  | 63  |
| 31  | 43 | 34  | 20  | 29  | 32  | 36  | 23  | 27  | 36  |
| 63  | 86 | 76  | 124 | 185 | 144 | 221 | 208 | 193 | 111 |
| 53  | 75 | 66  | 57  | 60  | 47  | 81  | 100 | 96  | 63  |
| 56  | 53 | 51  | 58  | 64  | 57  | 81  | 83  | 86  | 48  |
| 53  | 51 | 37  | 37  | 49  | 51  | 39  | 44  | 46  | 49  |
| 22  | 34 | 33  | 54  | 66  | 59  | 47  | 49  | 38  | 30  |
| 48  | 49 | 45  | 36  | 30  | 28  | 45  | 38  | 43  | 41  |
| 29  | 46 | 58  | 81  | 70  | 76  | 82  | 65  | 89  | 59  |
| 45  | 42 | 51  | 67  | 68  | 53  | 57  | 36  | 50  | 41  |
| 31  | 39 | 37  | 54  | 58  | 45  | 57  | 47  | 47  | 37  |
| 32  | 41 | 40  | 31  | 35  | 41  | 29  | 32  | 32  | 37  |
| 40  | 40 | 42  | 26  | 42  | 36  | 34  | 24  | 38  | 38  |
| 18  | 19 | 27  | 15  | 31  | 29  | 32  | 38  | 31  | 18  |
| 49  | 52 | 42  | 68  | 93  | 75  | 103 | 91  | 99  | 66  |
| 54  | 42 | 50  | 53  | 42  | 43  | 64  | 45  | 43  | 38  |
| 59  | 35 | 64  | 58  | 69  | 66  | 54  | 39  | 57  | 53  |
| 42  | 57 | 47  | 62  | 108 | 81  | 90  | 85  | 94  | 50  |
| 65  | 80 | 64  | 107 | 135 | 121 | 92  | 76  | 109 | 58  |
| 70  | 73 | 65  | 92  | 102 | 80  | 95  | 82  | 104 | 76  |
| 51  | 42 | 44  | 41  | 60  | 53  | 45  | 52  | 47  | 48  |
| 30  | 18 | 38  | 36  | 31  | 31  | 16  | 19  | 22  | 28  |
| 31  | 21 | 31  | 27  | 39  | 24  | 29  | 30  | 29  | 28  |
| 47  | 54 | 48  | 92  | 83  | 87  | 74  | 80  | 89  | 52  |
| 45  | 40 | 41  | 32  | 52  | 40  | 36  | 29  | 28  | 39  |
| 46  | 61 | 70  | 58  | 56  | 52  | 64  | 58  | 68  | 41  |
| 46  | 49 | 46  | 72  | 74  | 56  | 75  | 59  | 86  | 44  |
| 93  | 94 | 108 | 44  | 36  | 35  | 39  | 45  | 38  | 30  |
| 63  | 46 | 70  | 56  | 105 | 87  | 79  | 82  | 73  | 58  |
| 61  | 68 | 69  | 202 | 257 | 225 | 291 | 243 | 295 | 118 |
| 58  | 66 | 77  | 68  | 66  | 69  | 81  | 59  | 76  | 64  |
| 38  | 40 | 51  | 62  | 73  | 53  | 82  | 55  | 52  | 38  |
| 50  | 75 | 75  | 54  | 80  | 67  | 73  | 67  | 76  | 60  |
| 64  | 56 | 69  | 70  | 82  | 94  | 82  | 73  | 86  | 61  |
| 44  | 43 | 46  | 61  | 61  | 63  | 72  | 41  | 57  | 32  |
| 100 | 77 | 92  | 140 | 151 | 181 | 156 | 136 | 150 | 83  |
| 56  | 61 | 57  | 105 | 126 | 113 | 163 | 150 | 138 | 78  |
| 65  | 66 | 74  | 85  | 91  | 53  | 101 | 90  | 114 | 35  |



|    |     |     |     |     |     |     |     |     |     |
|----|-----|-----|-----|-----|-----|-----|-----|-----|-----|
| 42 | 29  | 36  | 40  | 50  | 28  | 54  | 40  | 50  | 41  |
| 77 | 56  | 84  | 136 | 186 | 141 | 146 | 112 | 136 | 80  |
| 40 | 42  | 51  | 67  | 97  | 68  | 92  | 87  | 91  | 60  |
| 45 | 48  | 65  | 86  | 119 | 58  | 88  | 70  | 80  | 42  |
| 58 | 36  | 51  | 56  | 86  | 71  | 63  | 71  | 89  | 46  |
| 36 | 35  | 31  | 34  | 32  | 31  | 38  | 25  | 34  | 15  |
| 30 | 27  | 37  | 41  | 45  | 48  | 43  | 36  | 30  | 35  |
| 36 | 31  | 47  | 64  | 84  | 85  | 50  | 44  | 43  | 31  |
| 34 | 39  | 42  | 192 | 195 | 185 | 183 | 136 | 140 | 67  |
| 42 | 33  | 38  | 53  | 77  | 71  | 51  | 57  | 56  | 37  |
| 47 | 43  | 39  | 56  | 78  | 77  | 65  | 53  | 66  | 47  |
| 51 | 51  | 48  | 160 | 218 | 154 | 145 | 142 | 152 | 80  |
| 27 | 33  | 31  | 54  | 51  | 46  | 44  | 32  | 43  | 29  |
| 30 | 34  | 35  | 57  | 71  | 51  | 46  | 47  | 36  | 28  |
| 62 | 43  | 71  | 80  | 94  | 70  | 61  | 44  | 63  | 52  |
| 30 | 35  | 53  | 22  | 31  | 31  | 25  | 29  | 38  | 25  |
| 78 | 84  | 80  | 46  | 62  | 57  | 39  | 43  | 48  | 34  |
| 26 | 32  | 27  | 15  | 25  | 25  | 30  | 17  | 30  | 24  |
| 48 | 51  | 54  | 75  | 89  | 75  | 55  | 44  | 58  | 46  |
| 45 | 39  | 38  | 49  | 55  | 47  | 35  | 28  | 35  | 22  |
| 79 | 81  | 88  | 39  | 41  | 44  | 33  | 20  | 32  | 31  |
| 27 | 15  | 22  | 19  | 17  | 22  | 17  | 15  | 16  | 14  |
| 30 | 34  | 36  | 45  | 42  | 32  | 30  | 38  | 34  | 29  |
| 33 | 27  | 33  | 49  | 71  | 55  | 54  | 53  | 64  | 18  |
| 39 | 41  | 68  | 137 | 143 | 155 | 102 | 74  | 99  | 66  |
| 42 | 40  | 39  | 63  | 69  | 71  | 64  | 59  | 66  | 40  |
| 77 | 71  | 85  | 122 | 148 | 151 | 159 | 129 | 149 | 88  |
| 97 | 113 | 112 | 84  | 96  | 72  | 90  | 98  | 76  | 72  |
| 98 | 90  | 87  | 164 | 198 | 180 | 271 | 264 | 293 | 129 |
| 55 | 60  | 47  | 79  | 119 | 107 | 98  | 95  | 111 | 59  |
| 36 | 44  | 49  | 36  | 31  | 27  | 35  | 30  | 39  | 36  |
| 45 | 40  | 50  | 87  | 137 | 123 | 111 | 87  | 107 | 60  |
| 59 | 52  | 67  | 127 | 153 | 149 | 149 | 165 | 163 | 73  |
| 25 | 29  | 35  | 65  | 100 | 93  | 96  | 73  | 70  | 43  |
| 29 | 44  | 42  | 40  | 40  | 52  | 33  | 32  | 35  | 33  |
| 50 | 40  | 60  | 47  | 73  | 72  | 68  | 43  | 57  | 46  |
| 18 | 25  | 14  | 34  | 39  | 24  | 25  | 13  | 21  | 28  |
| 40 | 33  | 53  | 70  | 87  | 73  | 62  | 63  | 80  | 30  |
| 40 | 42  | 44  | 65  | 72  | 84  | 62  | 64  | 61  | 40  |
| 24 | 30  | 36  | 93  | 139 | 84  | 77  | 77  | 96  | 51  |
| 36 | 31  | 29  | 80  | 92  | 97  | 130 | 106 | 125 | 56  |

|     |     |     |     |     |     |     |     |     |     |
|-----|-----|-----|-----|-----|-----|-----|-----|-----|-----|
| 35  | 29  | 49  | 54  | 83  | 77  | 74  | 54  | 55  | 50  |
| 17  | 24  | 21  | 26  | 23  | 26  | 24  | 16  | 20  | 19  |
| 50  | 74  | 88  | 54  | 80  | 76  | 73  | 56  | 65  | 52  |
| 64  | 47  | 61  | 34  | 46  | 26  | 48  | 40  | 50  | 24  |
| 98  | 96  | 95  | 95  | 119 | 113 | 87  | 87  | 85  | 77  |
| 60  | 51  | 50  | 49  | 55  | 50  | 72  | 50  | 56  | 35  |
| 77  | 80  | 87  | 63  | 78  | 63  | 67  | 49  | 58  | 51  |
| 22  | 23  | 27  | 96  | 118 | 87  | 72  | 55  | 67  | 31  |
| 13  | 14  | 17  | 9   | 19  | 10  | 11  | 11  | 11  | 12  |
| 76  | 81  | 90  | 246 | 295 | 289 | 253 | 256 | 296 | 118 |
| 101 | 116 | 76  | 38  | 52  | 31  | 43  | 40  | 54  | 39  |
| 24  | 23  | 18  | 35  | 47  | 47  | 39  | 32  | 36  | 18  |
| 35  | 29  | 25  | 46  | 48  | 39  | 56  | 42  | 48  | 27  |
| 48  | 30  | 39  | 28  | 37  | 40  | 27  | 28  | 28  | 31  |
| 57  | 55  | 65  | 56  | 62  | 62  | 73  | 57  | 66  | 51  |
| 52  | 45  | 55  | 36  | 34  | 32  | 60  | 60  | 54  | 46  |
| 32  | 31  | 27  | 19  | 25  | 17  | 33  | 28  | 25  | 14  |
| 11  | 9   | 20  | 14  | 22  | 17  | 16  | 23  | 19  | 14  |
| 40  | 29  | 29  | 69  | 86  | 77  | 58  | 57  | 51  | 30  |
| 29  | 49  | 28  | 60  | 76  | 67  | 70  | 73  | 62  | 39  |
| 11  | 13  | 16  | 23  | 20  | 18  | 12  | 13  | 14  | 16  |
| 63  | 59  | 69  | 154 | 218 | 185 | 226 | 195 | 217 | 96  |
| 40  | 29  | 41  | 33  | 47  | 40  | 38  | 41  | 39  | 34  |
| 69  | 77  | 71  | 66  | 93  | 85  | 87  | 73  | 90  | 71  |
| 68  | 77  | 72  | 96  | 77  | 91  | 118 | 93  | 111 | 67  |
| 53  | 62  | 54  | 79  | 92  | 75  | 64  | 59  | 75  | 44  |
| 38  | 19  | 38  | 40  | 42  | 40  | 48  | 29  | 34  | 43  |
| 133 | 133 | 159 | 85  | 88  | 91  | 112 | 101 | 91  | 121 |
| 56  | 44  | 54  | 78  | 83  | 89  | 51  | 45  | 59  | 48  |
| 50  | 77  | 61  | 73  | 81  | 74  | 101 | 95  | 110 | 69  |
| 35  | 40  | 45  | 41  | 44  | 29  | 48  | 29  | 34  | 24  |
| 97  | 87  | 91  | 55  | 66  | 64  | 53  | 57  | 63  | 80  |
| 54  | 59  | 66  | 97  | 118 | 116 | 93  | 77  | 93  | 63  |
| 30  | 46  | 36  | 36  | 98  | 60  | 62  | 68  | 66  | 48  |
| 43  | 36  | 27  | 59  | 81  | 74  | 127 | 107 | 108 | 56  |
| 31  | 43  | 39  | 30  | 49  | 50  | 36  | 36  | 45  | 35  |
| 31  | 33  | 32  | 26  | 32  | 34  | 34  | 43  | 44  | 22  |
| 20  | 21  | 29  | 21  | 26  | 23  | 25  | 24  | 27  | 17  |
| 29  | 29  | 29  | 19  | 12  | 17  | 20  | 12  | 19  | 25  |
| 29  | 52  | 60  | 52  | 49  | 53  | 50  | 43  | 43  | 35  |
| 58  | 52  | 48  | 107 | 142 | 124 | 158 | 131 | 150 | 77  |

|     |     |     |     |     |     |      |      |      |     |
|-----|-----|-----|-----|-----|-----|------|------|------|-----|
| 42  | 32  | 46  | 53  | 75  | 59  | 27   | 24   | 26   | 36  |
| 51  | 39  | 57  | 90  | 110 | 98  | 88   | 49   | 65   | 41  |
| 22  | 22  | 28  | 51  | 65  | 50  | 55   | 46   | 51   | 34  |
| 35  | 46  | 48  | 66  | 75  | 58  | 63   | 46   | 46   | 46  |
| 24  | 30  | 16  | 22  | 47  | 27  | 25   | 22   | 26   | 19  |
| 38  | 31  | 48  | 38  | 44  | 43  | 42   | 50   | 36   | 40  |
| 26  | 19  | 28  | 22  | 39  | 21  | 22   | 31   | 18   | 15  |
| 49  | 33  | 62  | 42  | 61  | 62  | 47   | 46   | 44   | 37  |
| 23  | 24  | 19  | 26  | 30  | 20  | 21   | 20   | 27   | 23  |
| 18  | 19  | 19  | 59  | 64  | 63  | 57   | 37   | 47   | 26  |
| 115 | 123 | 125 | 95  | 122 | 123 | 102  | 85   | 123  | 77  |
| 156 | 191 | 189 | 80  | 84  | 82  | 84   | 96   | 113  | 54  |
| 72  | 78  | 108 | 81  | 83  | 82  | 102  | 116  | 113  | 73  |
| 136 | 109 | 124 | 38  | 61  | 49  | 58   | 49   | 54   | 43  |
| 109 | 111 | 122 | 126 | 138 | 180 | 190  | 206  | 223  | 113 |
| 105 | 137 | 145 | 61  | 77  | 76  | 58   | 74   | 63   | 50  |
| 111 | 145 | 113 | 98  | 125 | 119 | 155  | 138  | 151  | 100 |
| 199 | 209 | 232 | 647 | 877 | 807 | 1229 | 1129 | 1328 | 598 |
| 37  | 44  | 48  | 68  | 93  | 93  | 95   | 90   | 87   | 49  |
| 46  | 62  | 56  | 95  | 140 | 120 | 123  | 108  | 114  | 95  |
| 31  | 52  | 51  | 119 | 162 | 161 | 176  | 173  | 203  | 99  |
| 82  | 54  | 61  | 140 | 159 | 161 | 157  | 131  | 168  | 74  |
| 53  | 51  | 59  | 99  | 157 | 136 | 106  | 90   | 105  | 68  |
| 40  | 61  | 57  | 101 | 164 | 136 | 128  | 113  | 127  | 65  |
| 53  | 78  | 60  | 30  | 40  | 31  | 34   | 27   | 44   | 52  |
| 55  | 42  | 50  | 61  | 77  | 64  | 77   | 71   | 80   | 54  |
| 12  | 16  | 17  | 35  | 32  | 30  | 31   | 24   | 32   | 20  |
| 20  | 18  | 25  | 35  | 27  | 29  | 38   | 23   | 30   | 27  |
| 8   | 12  | 15  | 9   | 16  | 23  | 17   | 11   | 11   | 10  |
| 49  | 62  | 45  | 119 | 122 | 130 | 175  | 192  | 166  | 88  |
| 77  | 58  | 67  | 60  | 87  | 78  | 83   | 74   | 73   | 57  |
| 84  | 81  | 80  | 85  | 84  | 94  | 107  | 84   | 102  | 49  |
| 75  | 82  | 87  | 100 | 126 | 106 | 129  | 93   | 127  | 82  |
| 74  | 91  | 98  | 84  | 105 | 89  | 116  | 133  | 141  | 108 |
| 17  | 12  | 18  | 15  | 17  | 23  | 24   | 23   | 19   | 14  |
| 33  | 25  | 27  | 24  | 31  | 17  | 14   | 19   | 22   | 27  |
| 1   | 1   | 5   | 2   | 5   | 2   | 5    | 6    | 2    | 1   |
| 12  | 14  | 13  | 17  | 21  | 22  | 15   | 13   | 14   | 12  |
| 15  | 20  | 17  | 19  | 27  | 25  | 22   | 21   | 16   | 14  |
| 12  | 12  | 13  | 16  | 12  | 14  | 12   | 9    | 9    | 11  |
| 42  | 53  | 52  | 100 | 136 | 92  | 81   | 65   | 55   | 37  |

|     |     |     |     |     |     |     |     |     |     |
|-----|-----|-----|-----|-----|-----|-----|-----|-----|-----|
| 30  | 42  | 33  | 32  | 30  | 18  | 22  | 33  | 23  | 35  |
| 57  | 63  | 71  | 72  | 75  | 68  | 69  | 57  | 73  | 43  |
| 40  | 41  | 45  | 35  | 30  | 34  | 39  | 35  | 42  | 32  |
| 4   | 5   | 0   | 1   | 3   | 3   | 1   | 2   | 1   | 6   |
| 39  | 44  | 32  | 55  | 59  | 72  | 80  | 79  | 68  | 36  |
| 34  | 38  | 46  | 38  | 41  | 31  | 42  | 31  | 49  | 32  |
| 36  | 46  | 53  | 51  | 64  | 55  | 52  | 66  | 51  | 67  |
| 30  | 28  | 37  | 23  | 29  | 23  | 15  | 12  | 19  | 27  |
| 30  | 23  | 42  | 40  | 44  | 39  | 45  | 41  | 35  | 31  |
| 32  | 29  | 25  | 48  | 74  | 41  | 46  | 37  | 52  | 24  |
| 21  | 33  | 28  | 45  | 48  | 49  | 62  | 62  | 73  | 39  |
| 49  | 35  | 34  | 51  | 47  | 32  | 41  | 35  | 52  | 26  |
| 48  | 37  | 68  | 52  | 75  | 50  | 46  | 41  | 52  | 47  |
| 48  | 52  | 46  | 18  | 35  | 19  | 28  | 25  | 37  | 32  |
| 41  | 48  | 36  | 45  | 56  | 39  | 56  | 61  | 54  | 46  |
| 31  | 34  | 41  | 51  | 34  | 46  | 42  | 30  | 45  | 23  |
| 58  | 56  | 52  | 56  | 73  | 57  | 45  | 53  | 44  | 43  |
| 34  | 36  | 32  | 35  | 60  | 46  | 35  | 36  | 28  | 22  |
| 57  | 38  | 41  | 43  | 84  | 70  | 59  | 43  | 71  | 28  |
| 61  | 46  | 73  | 101 | 157 | 126 | 108 | 92  | 121 | 58  |
| 32  | 40  | 32  | 65  | 102 | 83  | 71  | 56  | 66  | 52  |
| 27  | 20  | 27  | 23  | 30  | 32  | 35  | 28  | 40  | 15  |
| 39  | 32  | 48  | 52  | 55  | 53  | 46  | 33  | 46  | 33  |
| 54  | 57  | 68  | 63  | 59  | 55  | 55  | 43  | 51  | 66  |
| 37  | 34  | 35  | 53  | 66  | 41  | 56  | 39  | 58  | 38  |
| 27  | 38  | 47  | 37  | 69  | 42  | 64  | 57  | 53  | 31  |
| 35  | 31  | 34  | 34  | 29  | 31  | 27  | 34  | 16  | 31  |
| 56  | 47  | 54  | 54  | 66  | 37  | 54  | 35  | 36  | 33  |
| 35  | 32  | 32  | 23  | 41  | 39  | 31  | 33  | 29  | 32  |
| 20  | 29  | 21  | 19  | 10  | 14  | 22  | 17  | 19  | 13  |
| 34  | 38  | 35  | 36  | 40  | 46  | 64  | 47  | 50  | 44  |
| 37  | 50  | 41  | 23  | 32  | 37  | 38  | 19  | 36  | 44  |
| 7   | 10  | 10  | 6   | 8   | 13  | 5   | 9   | 14  | 10  |
| 18  | 15  | 16  | 16  | 15  | 17  | 27  | 16  | 19  | 21  |
| 9   | 13  | 14  | 6   | 17  | 19  | 7   | 12  | 8   | 7   |
| 167 | 165 | 160 | 145 | 209 | 182 | 250 | 195 | 248 | 136 |
| 38  | 23  | 47  | 136 | 169 | 145 | 165 | 171 | 202 | 82  |
| 21  | 24  | 27  | 30  | 43  | 33  | 29  | 35  | 26  | 27  |
| 36  | 26  | 35  | 27  | 45  | 33  | 26  | 44  | 35  | 28  |
| 50  | 61  | 44  | 175 | 222 | 239 | 154 | 141 | 127 | 66  |
| 50  | 53  | 53  | 89  | 113 | 105 | 96  | 73  | 66  | 64  |

|     |     |     |     |     |     |     |     |     |     |
|-----|-----|-----|-----|-----|-----|-----|-----|-----|-----|
| 45  | 48  | 41  | 87  | 94  | 99  | 87  | 70  | 78  | 53  |
| 19  | 29  | 27  | 36  | 35  | 35  | 34  | 34  | 41  | 20  |
| 72  | 66  | 81  | 122 | 146 | 146 | 104 | 101 | 111 | 75  |
| 2   | 3   | 0   | 0   | 1   | 2   | 1   | 1   | 1   | 1   |
| 24  | 29  | 30  | 64  | 75  | 61  | 65  | 66  | 61  | 34  |
| 41  | 30  | 36  | 55  | 60  | 66  | 62  | 43  | 63  | 52  |
| 51  | 49  | 65  | 43  | 46  | 59  | 76  | 68  | 70  | 47  |
| 97  | 85  | 101 | 103 | 145 | 129 | 126 | 96  | 111 | 87  |
| 74  | 78  | 86  | 104 | 155 | 135 | 141 | 144 | 153 | 94  |
| 82  | 79  | 96  | 83  | 80  | 79  | 105 | 107 | 113 | 82  |
| 66  | 69  | 83  | 66  | 96  | 70  | 78  | 62  | 84  | 59  |
| 42  | 82  | 58  | 36  | 59  | 55  | 55  | 47  | 62  | 54  |
| 91  | 81  | 101 | 126 | 149 | 128 | 179 | 148 | 201 | 115 |
| 54  | 65  | 68  | 42  | 43  | 60  | 66  | 43  | 62  | 62  |
| 44  | 32  | 46  | 32  | 37  | 31  | 26  | 22  | 33  | 40  |
| 105 | 117 | 118 | 67  | 55  | 78  | 112 | 106 | 101 | 85  |
| 29  | 22  | 24  | 24  | 34  | 31  | 36  | 22  | 33  | 27  |
| 36  | 25  | 37  | 61  | 92  | 79  | 95  | 70  | 99  | 34  |
| 127 | 119 | 122 | 127 | 165 | 162 | 130 | 132 | 174 | 124 |
| 39  | 56  | 36  | 35  | 58  | 47  | 63  | 40  | 47  | 45  |
| 47  | 43  | 31  | 36  | 43  | 48  | 48  | 47  | 52  | 28  |
| 55  | 51  | 65  | 459 | 542 | 505 | 638 | 591 | 623 | 254 |
| 50  | 45  | 46  | 17  | 33  | 29  | 31  | 23  | 40  | 33  |
| 38  | 39  | 48  | 18  | 21  | 24  | 30  | 16  | 19  | 33  |
| 70  | 71  | 57  | 49  | 48  | 50  | 50  | 58  | 53  | 41  |
| 45  | 40  | 48  | 78  | 82  | 80  | 108 | 76  | 67  | 54  |
| 51  | 48  | 41  | 51  | 62  | 53  | 68  | 45  | 53  | 51  |
| 44  | 24  | 38  | 31  | 38  | 31  | 37  | 27  | 39  | 31  |
| 77  | 77  | 87  | 538 | 667 | 626 | 926 | 839 | 956 | 371 |
| 52  | 64  | 76  | 74  | 95  | 86  | 110 | 67  | 104 | 51  |
| 15  | 17  | 16  | 7   | 11  | 12  | 12  | 8   | 8   | 5   |
| 61  | 52  | 49  | 43  | 50  | 47  | 37  | 53  | 63  | 37  |
| 45  | 59  | 39  | 52  | 88  | 79  | 79  | 42  | 63  | 40  |
| 50  | 59  | 60  | 40  | 35  | 36  | 23  | 24  | 30  | 20  |
| 49  | 57  | 63  | 29  | 35  | 34  | 39  | 16  | 31  | 54  |
| 50  | 27  | 47  | 23  | 35  | 32  | 29  | 30  | 28  | 27  |
| 43  | 64  | 53  | 56  | 61  | 61  | 52  | 47  | 46  | 44  |
| 42  | 31  | 38  | 36  | 47  | 40  | 27  | 17  | 21  | 18  |
| 37  | 46  | 32  | 44  | 64  | 36  | 44  | 46  | 49  | 23  |
| 49  | 38  | 40  | 53  | 70  | 57  | 70  | 32  | 54  | 46  |
| 45  | 43  | 50  | 87  | 112 | 99  | 119 | 89  | 98  | 42  |

|    |    |     |     |     |     |     |     |     |    |
|----|----|-----|-----|-----|-----|-----|-----|-----|----|
| 45 | 55 | 49  | 118 | 147 | 149 | 131 | 111 | 110 | 69 |
| 61 | 61 | 70  | 146 | 201 | 177 | 154 | 195 | 208 | 97 |
| 33 | 43 | 37  | 82  | 97  | 100 | 83  | 80  | 94  | 46 |
| 49 | 54 | 63  | 67  | 88  | 66  | 83  | 70  | 74  | 61 |
| 33 | 26 | 29  | 118 | 136 | 116 | 97  | 114 | 133 | 52 |
| 23 | 41 | 39  | 72  | 87  | 89  | 75  | 65  | 80  | 59 |
| 40 | 42 | 40  | 51  | 57  | 48  | 81  | 51  | 51  | 29 |
| 68 | 77 | 72  | 84  | 95  | 92  | 111 | 109 | 97  | 90 |
| 30 | 35 | 46  | 72  | 88  | 99  | 49  | 36  | 48  | 34 |
| 81 | 89 | 104 | 119 | 182 | 154 | 165 | 130 | 170 | 83 |
| 58 | 68 | 72  | 110 | 150 | 116 | 98  | 94  | 112 | 76 |
| 65 | 64 | 74  | 101 | 133 | 120 | 108 | 103 | 101 | 69 |
| 43 | 46 | 42  | 58  | 80  | 54  | 55  | 32  | 44  | 35 |
| 67 | 66 | 75  | 96  | 129 | 95  | 81  | 71  | 75  | 70 |
| 62 | 63 | 73  | 68  | 89  | 50  | 68  | 63  | 75  | 54 |
| 15 | 19 | 28  | 13  | 25  | 15  | 19  | 12  | 9   | 31 |
| 83 | 82 | 90  | 98  | 126 | 101 | 110 | 104 | 109 | 81 |
| 85 | 70 | 97  | 171 | 206 | 182 | 179 | 131 | 178 | 77 |
| 63 | 66 | 69  | 131 | 169 | 152 | 88  | 66  | 105 | 70 |
| 37 | 44 | 48  | 113 | 119 | 110 | 91  | 105 | 81  | 51 |
| 35 | 47 | 51  | 40  | 41  | 38  | 47  | 39  | 38  | 39 |
| 19 | 20 | 18  | 33  | 44  | 30  | 54  | 35  | 29  | 22 |
| 27 | 22 | 34  | 38  | 66  | 52  | 34  | 45  | 42  | 29 |
| 26 | 36 | 35  | 69  | 73  | 71  | 64  | 56  | 64  | 45 |
| 18 | 27 | 17  | 39  | 47  | 31  | 25  | 32  | 32  | 25 |
| 11 | 12 | 7   | 11  | 13  | 12  | 6   | 7   | 9   | 6  |
| 18 | 11 | 6   | 11  | 18  | 18  | 14  | 14  | 16  | 11 |
| 12 | 10 | 12  | 5   | 7   | 7   | 8   | 5   | 2   | 5  |
| 40 | 24 | 32  | 48  | 50  | 70  | 55  | 42  | 46  | 24 |
| 62 | 63 | 96  | 47  | 41  | 44  | 64  | 62  | 65  | 46 |
| 22 | 15 | 25  | 39  | 43  | 45  | 21  | 22  | 28  | 14 |
| 8  | 7  | 9   | 14  | 28  | 17  | 18  | 14  | 13  | 14 |
| 29 | 24 | 37  | 48  | 78  | 62  | 67  | 66  | 52  | 37 |
| 53 | 47 | 60  | 85  | 96  | 108 | 112 | 96  | 135 | 68 |
| 24 | 25 | 21  | 33  | 44  | 49  | 59  | 29  | 38  | 35 |
| 63 | 62 | 63  | 76  | 84  | 85  | 99  | 95  | 110 | 75 |
| 55 | 69 | 83  | 76  | 93  | 83  | 97  | 87  | 88  | 65 |
| 30 | 64 | 33  | 72  | 101 | 100 | 71  | 90  | 99  | 49 |
| 41 | 39 | 32  | 92  | 103 | 77  | 63  | 37  | 55  | 29 |
| 80 | 69 | 70  | 47  | 76  | 71  | 75  | 65  | 74  | 56 |
| 58 | 49 | 54  | 103 | 146 | 141 | 115 | 95  | 118 | 56 |

|    |     |     |     |     |     |     |     |     |     |
|----|-----|-----|-----|-----|-----|-----|-----|-----|-----|
| 92 | 83  | 90  | 72  | 76  | 69  | 50  | 41  | 55  | 58  |
| 76 | 69  | 93  | 69  | 84  | 89  | 69  | 64  | 69  | 71  |
| 23 | 24  | 33  | 24  | 61  | 36  | 51  | 63  | 48  | 38  |
| 50 | 47  | 45  | 93  | 93  | 85  | 100 | 85  | 82  | 54  |
| 63 | 57  | 61  | 69  | 76  | 65  | 35  | 69  | 70  | 57  |
| 45 | 36  | 36  | 74  | 79  | 93  | 78  | 70  | 83  | 39  |
| 11 | 8   | 18  | 43  | 39  | 42  | 33  | 39  | 42  | 19  |
| 29 | 27  | 30  | 21  | 29  | 29  | 21  | 30  | 28  | 26  |
| 49 | 35  | 44  | 25  | 51  | 40  | 40  | 26  | 43  | 33  |
| 41 | 39  | 62  | 47  | 61  | 56  | 66  | 52  | 58  | 29  |
| 34 | 32  | 27  | 39  | 47  | 47  | 59  | 43  | 42  | 30  |
| 24 | 27  | 20  | 37  | 35  | 48  | 23  | 24  | 31  | 31  |
| 89 | 81  | 94  | 50  | 60  | 56  | 67  | 89  | 83  | 66  |
| 9  | 17  | 22  | 12  | 13  | 11  | 13  | 9   | 13  | 14  |
| 66 | 49  | 63  | 39  | 51  | 53  | 77  | 70  | 74  | 48  |
| 8  | 15  | 15  | 15  | 19  | 17  | 14  | 15  | 11  | 17  |
| 35 | 38  | 57  | 30  | 23  | 32  | 24  | 31  | 29  | 22  |
| 71 | 55  | 65  | 119 | 138 | 134 | 157 | 137 | 141 | 72  |
| 33 | 36  | 37  | 35  | 41  | 44  | 33  | 34  | 40  | 30  |
| 93 | 80  | 99  | 106 | 133 | 130 | 128 | 115 | 133 | 80  |
| 50 | 39  | 43  | 65  | 50  | 67  | 53  | 62  | 58  | 45  |
| 30 | 31  | 36  | 31  | 24  | 35  | 23  | 25  | 22  | 22  |
| 16 | 12  | 19  | 28  | 30  | 33  | 32  | 23  | 29  | 16  |
| 66 | 63  | 75  | 79  | 103 | 80  | 70  | 90  | 73  | 57  |
| 52 | 43  | 60  | 72  | 95  | 75  | 57  | 80  | 69  | 50  |
| 60 | 45  | 80  | 78  | 107 | 81  | 90  | 94  | 90  | 75  |
| 42 | 49  | 66  | 83  | 114 | 94  | 83  | 98  | 99  | 57  |
| 47 | 60  | 70  | 61  | 74  | 71  | 62  | 54  | 61  | 47  |
| 40 | 40  | 42  | 62  | 76  | 77  | 61  | 59  | 71  | 52  |
| 84 | 83  | 106 | 249 | 310 | 318 | 464 | 389 | 403 | 212 |
| 40 | 40  | 28  | 65  | 83  | 76  | 97  | 68  | 85  | 50  |
| 84 | 105 | 119 | 128 | 157 | 139 | 140 | 113 | 130 | 97  |
| 38 | 46  | 58  | 95  | 111 | 135 | 154 | 125 | 162 | 75  |
| 76 | 89  | 83  | 115 | 135 | 116 | 145 | 124 | 128 | 90  |
| 12 | 27  | 18  | 92  | 116 | 73  | 97  | 97  | 117 | 56  |
| 60 | 64  | 81  | 93  | 105 | 106 | 96  | 116 | 104 | 81  |
| 27 | 49  | 45  | 139 | 148 | 125 | 199 | 204 | 186 | 91  |
| 32 | 50  | 41  | 65  | 67  | 67  | 81  | 65  | 80  | 40  |
| 15 | 10  | 15  | 41  | 66  | 67  | 65  | 59  | 63  | 29  |
| 94 | 80  | 87  | 138 | 212 | 163 | 120 | 111 | 139 | 80  |
| 44 | 44  | 69  | 91  | 117 | 83  | 80  | 68  | 78  | 44  |

|     |     |     |     |     |     |     |     |     |     |
|-----|-----|-----|-----|-----|-----|-----|-----|-----|-----|
| 29  | 31  | 36  | 44  | 46  | 55  | 32  | 37  | 37  | 36  |
| 48  | 42  | 44  | 109 | 143 | 140 | 125 | 118 | 139 | 73  |
| 41  | 38  | 39  | 54  | 55  | 58  | 69  | 73  | 74  | 52  |
| 34  | 45  | 36  | 79  | 76  | 77  | 74  | 63  | 65  | 43  |
| 108 | 104 | 112 | 106 | 128 | 100 | 90  | 91  | 93  | 60  |
| 74  | 71  | 71  | 84  | 100 | 100 | 76  | 63  | 77  | 40  |
| 68  | 47  | 54  | 67  | 88  | 105 | 54  | 51  | 67  | 51  |
| 21  | 18  | 16  | 36  | 36  | 24  | 23  | 26  | 40  | 23  |
| 78  | 74  | 86  | 59  | 63  | 65  | 80  | 67  | 60  | 68  |
| 40  | 58  | 44  | 47  | 41  | 45  | 48  | 39  | 57  | 42  |
| 31  | 35  | 48  | 17  | 16  | 24  | 27  | 16  | 14  | 45  |
| 26  | 21  | 26  | 14  | 21  | 11  | 17  | 16  | 8   | 22  |
| 32  | 24  | 27  | 12  | 24  | 16  | 21  | 7   | 13  | 14  |
| 67  | 46  | 56  | 39  | 41  | 30  | 39  | 41  | 42  | 43  |
| 45  | 28  | 39  | 28  | 37  | 35  | 42  | 60  | 53  | 28  |
| 52  | 50  | 47  | 20  | 32  | 30  | 24  | 30  | 48  | 35  |
| 38  | 31  | 36  | 33  | 36  | 31  | 44  | 35  | 43  | 38  |
| 67  | 74  | 71  | 50  | 72  | 53  | 94  | 85  | 88  | 57  |
| 34  | 22  | 36  | 17  | 15  | 19  | 21  | 15  | 16  | 17  |
| 8   | 10  | 15  | 14  | 25  | 17  | 11  | 11  | 9   | 4   |
| 38  | 36  | 28  | 60  | 75  | 42  | 45  | 42  | 48  | 40  |
| 66  | 60  | 58  | 44  | 74  | 48  | 37  | 43  | 59  | 44  |
| 14  | 19  | 29  | 33  | 40  | 27  | 36  | 25  | 28  | 20  |
| 25  | 17  | 23  | 57  | 63  | 57  | 53  | 39  | 50  | 26  |
| 69  | 83  | 75  | 171 | 242 | 202 | 192 | 165 | 193 | 113 |
| 37  | 33  | 31  | 193 | 302 | 197 | 279 | 214 | 232 | 99  |
| 54  | 53  | 49  | 61  | 96  | 77  | 36  | 46  | 41  | 40  |
| 37  | 25  | 27  | 33  | 65  | 54  | 39  | 46  | 43  | 23  |
| 51  | 45  | 54  | 120 | 107 | 138 | 131 | 130 | 123 | 62  |
| 21  | 28  | 28  | 27  | 35  | 28  | 21  | 25  | 26  | 14  |
| 58  | 55  | 53  | 65  | 102 | 77  | 118 | 86  | 112 | 63  |
| 173 | 144 | 186 | 146 | 174 | 162 | 453 | 462 | 480 | 220 |
| 77  | 83  | 82  | 95  | 105 | 93  | 195 | 188 | 167 | 83  |
| 43  | 39  | 52  | 39  | 32  | 70  | 76  | 94  | 87  | 43  |
| 3   | 7   | 3   | 3   | 4   | 7   | 11  | 8   | 10  | 8   |
| 45  | 32  | 40  | 51  | 64  | 59  | 82  | 83  | 88  | 50  |
| 72  | 91  | 88  | 45  | 75  | 54  | 99  | 84  | 90  | 79  |
| 110 | 128 | 137 | 109 | 144 | 146 | 179 | 144 | 160 | 120 |
| 30  | 31  | 50  | 75  | 106 | 67  | 90  | 75  | 88  | 39  |
| 42  | 44  | 45  | 55  | 61  | 54  | 47  | 40  | 55  | 31  |
| 66  | 63  | 80  | 117 | 138 | 130 | 142 | 115 | 149 | 82  |



|     |     |     |     |     |     |     |     |     |     |
|-----|-----|-----|-----|-----|-----|-----|-----|-----|-----|
| 34  | 44  | 54  | 84  | 101 | 82  | 104 | 95  | 94  | 51  |
| 91  | 79  | 91  | 100 | 146 | 122 | 106 | 90  | 101 | 78  |
| 40  | 24  | 32  | 42  | 37  | 33  | 42  | 22  | 41  | 24  |
| 75  | 66  | 62  | 96  | 130 | 102 | 114 | 99  | 119 | 61  |
| 43  | 41  | 35  | 62  | 66  | 61  | 84  | 59  | 75  | 53  |
| 72  | 65  | 72  | 91  | 116 | 93  | 108 | 99  | 107 | 61  |
| 38  | 26  | 33  | 41  | 49  | 43  | 51  | 51  | 52  | 46  |
| 26  | 36  | 47  | 32  | 29  | 34  | 26  | 33  | 40  | 33  |
| 48  | 35  | 35  | 54  | 61  | 55  | 49  | 59  | 60  | 47  |
| 30  | 40  | 26  | 59  | 87  | 75  | 72  | 67  | 87  | 52  |
| 30  | 38  | 40  | 32  | 49  | 40  | 52  | 43  | 38  | 40  |
| 17  | 22  | 27  | 35  | 37  | 39  | 33  | 32  | 44  | 24  |
| 21  | 15  | 20  | 21  | 29  | 27  | 18  | 17  | 32  | 22  |
| 13  | 7   | 9   | 9   | 13  | 9   | 8   | 11  | 8   | 10  |
| 39  | 39  | 43  | 54  | 82  | 55  | 46  | 43  | 47  | 36  |
| 56  | 63  | 53  | 57  | 69  | 41  | 57  | 60  | 56  | 38  |
| 59  | 73  | 76  | 57  | 69  | 68  | 61  | 49  | 46  | 42  |
| 53  | 58  | 53  | 33  | 49  | 42  | 50  | 36  | 47  | 38  |
| 40  | 26  | 41  | 106 | 138 | 99  | 97  | 73  | 95  | 43  |
| 27  | 40  | 38  | 100 | 172 | 129 | 86  | 64  | 62  | 37  |
| 34  | 33  | 42  | 70  | 96  | 52  | 53  | 33  | 44  | 31  |
| 40  | 56  | 58  | 74  | 78  | 68  | 45  | 54  | 52  | 43  |
| 27  | 32  | 30  | 73  | 108 | 94  | 65  | 51  | 65  | 35  |
| 76  | 69  | 82  | 88  | 115 | 85  | 89  | 69  | 65  | 51  |
| 30  | 31  | 28  | 43  | 53  | 53  | 50  | 42  | 45  | 21  |
| 35  | 51  | 58  | 170 | 250 | 204 | 170 | 180 | 199 | 81  |
| 115 | 117 | 138 | 135 | 149 | 125 | 196 | 180 | 213 | 110 |
| 35  | 29  | 33  | 19  | 31  | 22  | 28  | 14  | 16  | 22  |
| 45  | 50  | 32  | 29  | 78  | 58  | 53  | 29  | 55  | 31  |
| 53  | 61  | 44  | 20  | 47  | 34  | 29  | 30  | 51  | 59  |
| 186 | 170 | 216 | 131 | 144 | 131 | 182 | 171 | 236 | 153 |
| 50  | 47  | 38  | 30  | 39  | 20  | 26  | 13  | 20  | 22  |
| 33  | 38  | 38  | 39  | 54  | 42  | 40  | 43  | 36  | 35  |
| 47  | 44  | 50  | 32  | 26  | 32  | 32  | 25  | 26  | 36  |
| 43  | 29  | 42  | 27  | 34  | 31  | 29  | 25  | 27  | 34  |
| 54  | 48  | 57  | 86  | 97  | 87  | 61  | 56  | 70  | 32  |
| 21  | 26  | 25  | 27  | 34  | 29  | 37  | 45  | 28  | 18  |
| 54  | 43  | 39  | 65  | 75  | 63  | 78  | 58  | 80  | 36  |
| 65  | 69  | 56  | 52  | 82  | 56  | 70  | 87  | 86  | 36  |
| 93  | 94  | 93  | 169 | 213 | 189 | 232 | 178 | 213 | 92  |
| 25  | 29  | 27  | 41  | 46  | 35  | 53  | 41  | 42  | 19  |

|     |     |     |     |     |     |     |     |     |     |
|-----|-----|-----|-----|-----|-----|-----|-----|-----|-----|
| 33  | 34  | 41  | 75  | 125 | 62  | 56  | 53  | 62  | 25  |
| 41  | 68  | 70  | 95  | 112 | 88  | 88  | 84  | 87  | 44  |
| 31  | 25  | 36  | 24  | 42  | 38  | 35  | 28  | 39  | 25  |
| 11  | 19  | 11  | 17  | 13  | 11  | 9   | 8   | 6   | 5   |
| 85  | 97  | 91  | 40  | 51  | 45  | 73  | 59  | 82  | 79  |
| 71  | 78  | 80  | 68  | 93  | 69  | 98  | 60  | 81  | 55  |
| 47  | 46  | 56  | 92  | 101 | 78  | 101 | 74  | 116 | 44  |
| 56  | 48  | 40  | 23  | 22  | 27  | 41  | 33  | 40  | 36  |
| 63  | 44  | 40  | 50  | 67  | 58  | 81  | 70  | 75  | 51  |
| 53  | 60  | 47  | 56  | 55  | 56  | 48  | 38  | 55  | 43  |
| 28  | 20  | 27  | 31  | 29  | 28  | 30  | 19  | 30  | 24  |
| 56  | 65  | 65  | 60  | 98  | 97  | 103 | 95  | 78  | 82  |
| 27  | 33  | 26  | 44  | 51  | 30  | 48  | 41  | 54  | 26  |
| 44  | 71  | 68  | 125 | 172 | 128 | 131 | 137 | 138 | 79  |
| 25  | 32  | 40  | 83  | 107 | 69  | 88  | 92  | 99  | 52  |
| 69  | 63  | 76  | 76  | 86  | 73  | 79  | 81  | 98  | 64  |
| 47  | 57  | 61  | 140 | 201 | 190 | 184 | 208 | 180 | 114 |
| 56  | 57  | 74  | 69  | 76  | 58  | 89  | 80  | 96  | 65  |
| 54  | 51  | 56  | 80  | 118 | 96  | 103 | 95  | 105 | 59  |
| 64  | 57  | 58  | 122 | 183 | 137 | 206 | 144 | 200 | 105 |
| 22  | 13  | 13  | 19  | 23  | 16  | 11  | 6   | 6   | 12  |
| 17  | 16  | 13  | 16  | 17  | 15  | 22  | 16  | 18  | 22  |
| 69  | 45  | 77  | 133 | 160 | 143 | 171 | 145 | 155 | 97  |
| 39  | 38  | 28  | 23  | 19  | 25  | 20  | 27  | 22  | 35  |
| 34  | 30  | 31  | 33  | 48  | 48  | 52  | 50  | 39  | 35  |
| 50  | 51  | 60  | 54  | 66  | 68  | 60  | 79  | 68  | 54  |
| 57  | 57  | 51  | 96  | 124 | 98  | 94  | 92  | 90  | 50  |
| 30  | 31  | 42  | 37  | 49  | 46  | 28  | 30  | 30  | 29  |
| 42  | 48  | 46  | 52  | 80  | 66  | 69  | 55  | 51  | 40  |
| 13  | 26  | 20  | 21  | 25  | 28  | 26  | 23  | 19  | 20  |
| 31  | 35  | 46  | 43  | 37  | 41  | 32  | 34  | 35  | 34  |
| 13  | 22  | 16  | 11  | 22  | 25  | 14  | 16  | 16  | 15  |
| 27  | 43  | 41  | 49  | 57  | 53  | 38  | 47  | 47  | 39  |
| 27  | 21  | 24  | 17  | 22  | 15  | 16  | 19  | 11  | 22  |
| 33  | 31  | 31  | 41  | 61  | 51  | 31  | 32  | 32  | 33  |
| 126 | 143 | 163 | 58  | 68  | 70  | 113 | 123 | 130 | 95  |
| 80  | 91  | 103 | 42  | 50  | 65  | 73  | 80  | 70  | 59  |
| 109 | 117 | 131 | 123 | 153 | 127 | 187 | 192 | 201 | 126 |
| 148 | 129 | 175 | 65  | 99  | 80  | 96  | 102 | 94  | 77  |
| 190 | 198 | 214 | 51  | 57  | 48  | 63  | 57  | 68  | 59  |
| 230 | 203 | 227 | 95  | 106 | 93  | 111 | 150 | 152 | 120 |

|     |     |     |     |     |     |     |     |     |     |
|-----|-----|-----|-----|-----|-----|-----|-----|-----|-----|
| 46  | 55  | 71  | 10  | 16  | 7   | 18  | 17  | 17  | 25  |
| 116 | 100 | 112 | 50  | 71  | 60  | 73  | 65  | 88  | 55  |
| 26  | 29  | 34  | 64  | 66  | 69  | 52  | 64  | 55  | 26  |
| 44  | 35  | 33  | 165 | 201 | 195 | 135 | 148 | 175 | 64  |
| 29  | 36  | 33  | 92  | 87  | 94  | 74  | 65  | 69  | 58  |
| 33  | 24  | 37  | 87  | 99  | 80  | 97  | 73  | 116 | 58  |
| 20  | 21  | 33  | 60  | 64  | 76  | 61  | 45  | 65  | 28  |
| 22  | 14  | 29  | 94  | 118 | 82  | 110 | 102 | 119 | 51  |
| 54  | 66  | 84  | 123 | 126 | 120 | 186 | 137 | 165 | 106 |
| 35  | 50  | 35  | 146 | 188 | 184 | 178 | 183 | 171 | 78  |
| 34  | 43  | 47  | 167 | 192 | 194 | 159 | 150 | 198 | 74  |
| 34  | 28  | 33  | 72  | 94  | 64  | 109 | 86  | 105 | 35  |
| 26  | 25  | 20  | 156 | 162 | 163 | 177 | 171 | 211 | 70  |
| 25  | 26  | 23  | 41  | 52  | 32  | 28  | 29  | 29  | 31  |
| 41  | 33  | 44  | 37  | 74  | 46  | 43  | 23  | 51  | 41  |
| 61  | 72  | 79  | 80  | 92  | 78  | 106 | 112 | 115 | 62  |
| 73  | 75  | 63  | 54  | 60  | 54  | 83  | 82  | 67  | 69  |
| 70  | 82  | 73  | 59  | 58  | 55  | 94  | 82  | 93  | 73  |
| 36  | 45  | 54  | 70  | 69  | 62  | 64  | 63  | 76  | 39  |
| 105 | 129 | 131 | 199 | 294 | 231 | 152 | 178 | 174 | 149 |
| 36  | 59  | 52  | 78  | 82  | 106 | 86  | 69  | 61  | 46  |
| 16  | 17  | 21  | 27  | 43  | 27  | 24  | 18  | 14  | 26  |
| 74  | 67  | 111 | 113 | 149 | 136 | 92  | 99  | 89  | 44  |
| 68  | 62  | 59  | 131 | 164 | 122 | 140 | 120 | 120 | 65  |
| 79  | 81  | 76  | 168 | 272 | 198 | 248 | 210 | 272 | 108 |
| 88  | 83  | 72  | 89  | 97  | 87  | 76  | 75  | 87  | 62  |
| 48  | 56  | 71  | 147 | 186 | 179 | 160 | 151 | 159 | 78  |
| 100 | 105 | 95  | 268 | 330 | 316 | 250 | 204 | 256 | 133 |
| 29  | 33  | 40  | 72  | 108 | 89  | 54  | 34  | 34  | 22  |
| 39  | 43  | 47  | 118 | 154 | 157 | 140 | 127 | 148 | 72  |
| 49  | 44  | 73  | 130 | 191 | 162 | 174 | 141 | 191 | 88  |
| 41  | 48  | 49  | 151 | 146 | 156 | 146 | 144 | 136 | 82  |
| 31  | 26  | 35  | 72  | 98  | 81  | 137 | 108 | 99  | 53  |
| 56  | 46  | 55  | 96  | 92  | 96  | 106 | 84  | 89  | 62  |
| 32  | 44  | 36  | 52  | 80  | 64  | 60  | 66  | 69  | 54  |
| 54  | 44  | 60  | 111 | 124 | 107 | 85  | 79  | 72  | 51  |
| 66  | 52  | 61  | 96  | 128 | 109 | 87  | 79  | 98  | 77  |
| 39  | 42  | 42  | 23  | 39  | 32  | 21  | 38  | 29  | 40  |
| 33  | 48  | 47  | 90  | 107 | 96  | 57  | 59  | 68  | 45  |
| 22  | 37  | 30  | 49  | 76  | 75  | 41  | 42  | 35  | 37  |
| 19  | 21  | 15  | 33  | 42  | 48  | 22  | 13  | 29  | 21  |

|     |     |     |     |     |     |     |     |     |     |
|-----|-----|-----|-----|-----|-----|-----|-----|-----|-----|
| 42  | 37  | 58  | 66  | 106 | 86  | 53  | 45  | 61  | 50  |
| 28  | 28  | 33  | 26  | 32  | 32  | 26  | 27  | 28  | 28  |
| 29  | 17  | 36  | 32  | 49  | 33  | 24  | 26  | 34  | 24  |
| 89  | 81  | 94  | 61  | 54  | 56  | 69  | 55  | 52  | 66  |
| 55  | 65  | 56  | 44  | 64  | 51  | 48  | 51  | 57  | 50  |
| 37  | 30  | 41  | 39  | 54  | 35  | 34  | 34  | 35  | 39  |
| 61  | 72  | 75  | 43  | 67  | 47  | 74  | 98  | 97  | 71  |
| 185 | 183 | 239 | 110 | 133 | 136 | 146 | 137 | 163 | 114 |
| 63  | 94  | 73  | 64  | 78  | 76  | 60  | 60  | 64  | 46  |
| 95  | 88  | 99  | 50  | 71  | 44  | 56  | 60  | 80  | 76  |
| 90  | 86  | 95  | 73  | 78  | 81  | 82  | 82  | 74  | 54  |
| 67  | 60  | 68  | 78  | 82  | 82  | 85  | 113 | 97  | 48  |
| 67  | 65  | 82  | 68  | 92  | 90  | 63  | 63  | 64  | 60  |
| 17  | 19  | 26  | 16  | 37  | 24  | 23  | 19  | 28  | 15  |
| 98  | 83  | 94  | 176 | 243 | 176 | 133 | 134 | 134 | 90  |
| 47  | 44  | 63  | 209 | 275 | 223 | 187 | 155 | 235 | 93  |
| 36  | 36  | 39  | 129 | 173 | 137 | 120 | 107 | 116 | 66  |
| 44  | 39  | 44  | 83  | 108 | 105 | 69  | 67  | 67  | 38  |
| 68  | 68  | 75  | 122 | 153 | 142 | 121 | 130 | 117 | 70  |
| 66  | 59  | 73  | 136 | 164 | 137 | 128 | 99  | 114 | 65  |
| 42  | 40  | 38  | 39  | 42  | 49  | 45  | 24  | 47  | 41  |
| 50  | 39  | 54  | 76  | 106 | 82  | 99  | 96  | 86  | 53  |
| 33  | 38  | 46  | 45  | 47  | 49  | 72  | 40  | 51  | 36  |
| 18  | 4   | 8   | 9   | 7   | 8   | 6   | 12  | 10  | 8   |
| 74  | 72  | 61  | 67  | 93  | 82  | 78  | 81  | 79  | 44  |
| 25  | 27  | 27  | 53  | 64  | 54  | 64  | 53  | 57  | 21  |
| 89  | 91  | 104 | 117 | 151 | 165 | 183 | 181 | 199 | 107 |
| 41  | 52  | 50  | 81  | 114 | 82  | 82  | 59  | 84  | 44  |
| 79  | 65  | 83  | 101 | 131 | 123 | 90  | 104 | 99  | 64  |
| 31  | 39  | 34  | 63  | 101 | 71  | 63  | 59  | 62  | 37  |
| 36  | 34  | 43  | 93  | 128 | 105 | 87  | 93  | 99  | 52  |
| 56  | 65  | 53  | 83  | 116 | 82  | 78  | 79  | 74  | 48  |
| 57  | 63  | 77  | 125 | 146 | 136 | 82  | 68  | 69  | 71  |
| 78  | 76  | 90  | 148 | 189 | 178 | 131 | 108 | 142 | 76  |
| 40  | 40  | 40  | 60  | 77  | 71  | 47  | 41  | 40  | 27  |
| 43  | 39  | 38  | 37  | 44  | 26  | 27  | 32  | 21  | 28  |
| 35  | 42  | 45  | 64  | 72  | 56  | 73  | 55  | 62  | 40  |
| 60  | 79  | 76  | 55  | 60  | 54  | 51  | 42  | 53  | 64  |
| 22  | 35  | 26  | 19  | 35  | 28  | 21  | 22  | 16  | 23  |
| 52  | 53  | 37  | 33  | 43  | 33  | 27  | 42  | 37  | 36  |
| 37  | 47  | 52  | 64  | 96  | 88  | 76  | 63  | 79  | 51  |

|     |     |     |     |     |     |     |     |     |     |
|-----|-----|-----|-----|-----|-----|-----|-----|-----|-----|
| 61  | 56  | 57  | 42  | 51  | 44  | 40  | 43  | 44  | 34  |
| 6   | 11  | 13  | 11  | 16  | 13  | 15  | 13  | 13  | 11  |
| 25  | 25  | 29  | 16  | 23  | 33  | 21  | 20  | 12  | 17  |
| 44  | 43  | 45  | 31  | 42  | 39  | 45  | 50  | 40  | 38  |
| 26  | 20  | 27  | 50  | 50  | 49  | 27  | 49  | 34  | 29  |
| 84  | 87  | 99  | 68  | 82  | 70  | 69  | 48  | 77  | 48  |
| 42  | 36  | 51  | 48  | 45  | 35  | 38  | 46  | 37  | 32  |
| 49  | 63  | 62  | 51  | 63  | 62  | 39  | 43  | 35  | 36  |
| 37  | 39  | 42  | 18  | 40  | 34  | 31  | 21  | 27  | 26  |
| 93  | 85  | 106 | 82  | 112 | 85  | 121 | 117 | 122 | 91  |
| 36  | 27  | 21  | 26  | 43  | 44  | 15  | 22  | 37  | 23  |
| 28  | 35  | 38  | 44  | 43  | 57  | 40  | 42  | 29  | 42  |
| 20  | 15  | 28  | 10  | 17  | 9   | 11  | 10  | 14  | 7   |
| 81  | 89  | 87  | 112 | 126 | 105 | 102 | 76  | 91  | 54  |
| 47  | 51  | 45  | 34  | 47  | 38  | 41  | 40  | 33  | 34  |
| 44  | 36  | 44  | 39  | 57  | 55  | 68  | 62  | 64  | 46  |
| 59  | 62  | 55  | 59  | 58  | 64  | 68  | 58  | 69  | 58  |
| 42  | 37  | 31  | 56  | 60  | 48  | 27  | 35  | 17  | 33  |
| 25  | 24  | 26  | 41  | 64  | 53  | 70  | 57  | 67  | 35  |
| 30  | 36  | 44  | 79  | 106 | 96  | 100 | 79  | 82  | 48  |
| 24  | 21  | 10  | 10  | 23  | 19  | 16  | 12  | 6   | 13  |
| 32  | 42  | 41  | 32  | 25  | 40  | 35  | 31  | 39  | 35  |
| 54  | 42  | 45  | 57  | 57  | 70  | 100 | 65  | 94  | 55  |
| 77  | 78  | 74  | 94  | 114 | 134 | 138 | 138 | 126 | 89  |
| 29  | 38  | 52  | 36  | 57  | 46  | 67  | 61  | 68  | 45  |
| 22  | 9   | 14  | 11  | 12  | 7   | 10  | 15  | 11  | 13  |
| 75  | 64  | 77  | 68  | 68  | 71  | 60  | 48  | 67  | 52  |
| 81  | 89  | 85  | 85  | 145 | 126 | 112 | 91  | 83  | 71  |
| 66  | 53  | 59  | 87  | 116 | 92  | 75  | 89  | 73  | 55  |
| 44  | 42  | 42  | 55  | 76  | 65  | 55  | 51  | 58  | 43  |
| 44  | 42  | 47  | 23  | 20  | 22  | 26  | 27  | 29  | 35  |
| 33  | 43  | 46  | 25  | 37  | 43  | 32  | 26  | 21  | 20  |
| 37  | 36  | 28  | 18  | 50  | 26  | 27  | 24  | 20  | 37  |
| 49  | 42  | 47  | 29  | 40  | 41  | 37  | 36  | 36  | 38  |
| 57  | 62  | 67  | 31  | 49  | 49  | 40  | 33  | 39  | 29  |
| 30  | 34  | 37  | 21  | 35  | 31  | 30  | 27  | 37  | 20  |
| 55  | 40  | 48  | 31  | 49  | 48  | 68  | 56  | 68  | 40  |
| 24  | 20  | 33  | 102 | 148 | 110 | 72  | 64  | 72  | 22  |
| 70  | 42  | 73  | 102 | 133 | 110 | 107 | 116 | 109 | 52  |
| 36  | 52  | 54  | 123 | 142 | 106 | 76  | 52  | 59  | 36  |
| 122 | 144 | 159 | 178 | 237 | 211 | 181 | 168 | 179 | 110 |

|     |     |     |     |     |     |     |     |     |     |
|-----|-----|-----|-----|-----|-----|-----|-----|-----|-----|
| 47  | 31  | 51  | 53  | 50  | 47  | 57  | 47  | 58  | 22  |
| 79  | 70  | 81  | 85  | 100 | 75  | 105 | 78  | 85  | 56  |
| 30  | 38  | 39  | 82  | 69  | 62  | 77  | 80  | 77  | 34  |
| 12  | 22  | 11  | 24  | 27  | 34  | 18  | 24  | 27  | 16  |
| 67  | 83  | 84  | 70  | 90  | 70  | 67  | 62  | 64  | 42  |
| 36  | 41  | 39  | 151 | 151 | 134 | 206 | 175 | 202 | 83  |
| 54  | 48  | 47  | 141 | 177 | 169 | 187 | 164 | 178 | 99  |
| 38  | 34  | 34  | 39  | 37  | 33  | 32  | 29  | 23  | 14  |
| 37  | 43  | 52  | 66  | 91  | 70  | 51  | 35  | 50  | 29  |
| 56  | 72  | 65  | 91  | 106 | 99  | 74  | 70  | 80  | 63  |
| 45  | 54  | 67  | 59  | 89  | 79  | 55  | 57  | 59  | 57  |
| 58  | 58  | 62  | 165 | 161 | 166 | 195 | 164 | 166 | 112 |
| 53  | 44  | 47  | 73  | 93  | 63  | 69  | 58  | 63  | 57  |
| 22  | 15  | 28  | 24  | 33  | 21  | 17  | 13  | 13  | 20  |
| 37  | 55  | 44  | 35  | 30  | 29  | 25  | 22  | 25  | 41  |
| 40  | 46  | 51  | 54  | 54  | 55  | 48  | 39  | 52  | 38  |
| 46  | 34  | 39  | 39  | 54  | 51  | 35  | 20  | 40  | 35  |
| 41  | 40  | 50  | 53  | 67  | 65  | 62  | 48  | 61  | 38  |
| 44  | 37  | 43  | 63  | 79  | 76  | 49  | 64  | 61  | 47  |
| 43  | 44  | 47  | 53  | 84  | 57  | 48  | 40  | 45  | 22  |
| 39  | 44  | 44  | 46  | 65  | 61  | 60  | 49  | 52  | 37  |
| 44  | 39  | 45  | 41  | 38  | 35  | 22  | 34  | 42  | 32  |
| 69  | 71  | 88  | 51  | 52  | 49  | 61  | 67  | 68  | 56  |
| 55  | 61  | 65  | 106 | 112 | 107 | 74  | 52  | 56  | 50  |
| 45  | 42  | 41  | 70  | 76  | 61  | 120 | 87  | 102 | 36  |
| 24  | 19  | 21  | 43  | 79  | 62  | 47  | 35  | 39  | 22  |
| 24  | 18  | 21  | 48  | 55  | 46  | 44  | 49  | 45  | 16  |
| 20  | 21  | 20  | 24  | 41  | 32  | 33  | 32  | 32  | 20  |
| 13  | 17  | 10  | 31  | 22  | 19  | 29  | 36  | 31  | 18  |
| 78  | 87  | 88  | 146 | 145 | 138 | 161 | 191 | 186 | 109 |
| 27  | 35  | 28  | 20  | 39  | 23  | 28  | 21  | 14  | 20  |
| 33  | 48  | 44  | 94  | 111 | 103 | 89  | 63  | 75  | 51  |
| 23  | 40  | 31  | 30  | 39  | 21  | 35  | 32  | 25  | 31  |
| 126 | 142 | 144 | 104 | 146 | 95  | 151 | 153 | 136 | 132 |
| 45  | 39  | 50  | 105 | 164 | 141 | 154 | 125 | 119 | 56  |
| 40  | 39  | 33  | 47  | 49  | 36  | 43  | 41  | 53  | 42  |
| 30  | 30  | 48  | 60  | 76  | 57  | 38  | 43  | 50  | 35  |
| 36  | 42  | 43  | 29  | 36  | 37  | 41  | 28  | 38  | 29  |
| 43  | 42  | 38  | 70  | 81  | 71  | 55  | 74  | 74  | 35  |
| 39  | 43  | 35  | 34  | 51  | 44  | 48  | 50  | 47  | 40  |
| 18  | 18  | 21  | 91  | 135 | 96  | 75  | 61  | 66  | 38  |

|     |     |     |     |     |     |     |     |     |     |
|-----|-----|-----|-----|-----|-----|-----|-----|-----|-----|
| 32  | 22  | 21  | 65  | 66  | 44  | 44  | 27  | 24  | 18  |
| 31  | 30  | 40  | 420 | 486 | 370 | 467 | 401 | 452 | 232 |
| 4   | 1   | 6   | 4   | 8   | 10  | 4   | 3   | 8   | 2   |
| 25  | 30  | 30  | 66  | 96  | 79  | 48  | 59  | 56  | 36  |
| 25  | 18  | 29  | 55  | 68  | 58  | 33  | 33  | 35  | 23  |
| 3   | 1   | 4   | 27  | 53  | 26  | 22  | 8   | 18  | 8   |
| 36  | 38  | 43  | 91  | 126 | 94  | 94  | 89  | 86  | 50  |
| 28  | 28  | 39  | 26  | 40  | 28  | 19  | 35  | 38  | 30  |
| 34  | 30  | 42  | 34  | 37  | 38  | 30  | 33  | 41  | 43  |
| 16  | 16  | 24  | 21  | 29  | 27  | 38  | 24  | 23  | 20  |
| 44  | 56  | 44  | 90  | 113 | 110 | 129 | 90  | 94  | 67  |
| 40  | 52  | 57  | 58  | 94  | 57  | 72  | 70  | 106 | 49  |
| 30  | 42  | 33  | 65  | 95  | 68  | 83  | 83  | 77  | 50  |
| 39  | 35  | 39  | 35  | 50  | 33  | 53  | 59  | 53  | 39  |
| 23  | 22  | 21  | 38  | 45  | 48  | 77  | 56  | 79  | 43  |
| 38  | 42  | 50  | 68  | 74  | 73  | 82  | 72  | 76  | 62  |
| 37  | 37  | 45  | 42  | 43  | 46  | 42  | 28  | 52  | 42  |
| 50  | 52  | 56  | 54  | 65  | 53  | 37  | 35  | 36  | 39  |
| 28  | 29  | 47  | 61  | 75  | 43  | 41  | 43  | 46  | 35  |
| 15  | 13  | 7   | 27  | 36  | 16  | 18  | 8   | 17  | 9   |
| 36  | 47  | 57  | 62  | 82  | 56  | 57  | 58  | 59  | 43  |
| 25  | 41  | 29  | 57  | 101 | 68  | 75  | 54  | 68  | 43  |
| 32  | 35  | 42  | 57  | 65  | 61  | 68  | 43  | 68  | 31  |
| 22  | 25  | 18  | 37  | 71  | 39  | 26  | 34  | 31  | 30  |
| 38  | 32  | 24  | 49  | 59  | 32  | 51  | 32  | 62  | 28  |
| 30  | 24  | 19  | 33  | 60  | 36  | 25  | 25  | 27  | 27  |
| 32  | 32  | 35  | 49  | 57  | 48  | 37  | 45  | 34  | 35  |
| 152 | 132 | 154 | 78  | 117 | 121 | 207 | 189 | 219 | 141 |
| 74  | 63  | 63  | 61  | 74  | 69  | 58  | 59  | 72  | 48  |
| 103 | 85  | 116 | 77  | 111 | 92  | 81  | 68  | 80  | 75  |
| 127 | 121 | 137 | 76  | 101 | 94  | 97  | 80  | 89  | 68  |
| 64  | 67  | 76  | 31  | 60  | 54  | 32  | 39  | 46  | 41  |
| 50  | 46  | 41  | 73  | 130 | 71  | 128 | 111 | 104 | 74  |
| 96  | 102 | 108 | 34  | 29  | 27  | 31  | 39  | 36  | 40  |
| 46  | 63  | 44  | 51  | 45  | 38  | 31  | 37  | 33  | 33  |
| 69  | 54  | 79  | 42  | 33  | 45  | 42  | 46  | 41  | 32  |
| 39  | 31  | 35  | 28  | 30  | 18  | 20  | 17  | 20  | 19  |
| 136 | 167 | 144 | 102 | 129 | 144 | 129 | 125 | 149 | 99  |
| 49  | 52  | 77  | 45  | 52  | 48  | 35  | 16  | 36  | 49  |
| 21  | 9   | 13  | 9   | 15  | 7   | 12  | 10  | 10  | 15  |
| 59  | 61  | 66  | 67  | 71  | 61  | 35  | 51  | 41  | 47  |

|     |     |     |     |     |     |     |     |     |     |
|-----|-----|-----|-----|-----|-----|-----|-----|-----|-----|
| 58  | 39  | 42  | 59  | 76  | 71  | 51  | 37  | 62  | 33  |
| 55  | 49  | 62  | 106 | 150 | 125 | 93  | 89  | 85  | 62  |
| 19  | 25  | 22  | 29  | 38  | 21  | 27  | 30  | 31  | 23  |
| 69  | 81  | 78  | 119 | 155 | 157 | 93  | 94  | 93  | 69  |
| 111 | 117 | 120 | 87  | 121 | 97  | 108 | 107 | 104 | 105 |
| 50  | 49  | 59  | 70  | 89  | 52  | 56  | 60  | 68  | 58  |
| 20  | 30  | 21  | 19  | 20  | 29  | 14  | 9   | 14  | 24  |
| 19  | 19  | 24  | 15  | 19  | 14  | 12  | 10  | 17  | 12  |
| 56  | 72  | 62  | 67  | 95  | 87  | 98  | 101 | 92  | 77  |
| 64  | 63  | 60  | 96  | 142 | 114 | 92  | 103 | 83  | 65  |
| 65  | 95  | 102 | 76  | 87  | 59  | 93  | 91  | 91  | 80  |
| 70  | 59  | 58  | 43  | 86  | 71  | 57  | 34  | 51  | 52  |
| 69  | 40  | 71  | 45  | 75  | 36  | 58  | 48  | 52  | 47  |
| 19  | 24  | 18  | 7   | 12  | 10  | 6   | 4   | 6   | 14  |
| 27  | 31  | 33  | 7   | 18  | 17  | 9   | 15  | 14  | 16  |
| 54  | 70  | 48  | 81  | 77  | 83  | 72  | 64  | 71  | 71  |
| 60  | 47  | 48  | 41  | 64  | 63  | 60  | 45  | 49  | 41  |
| 52  | 70  | 73  | 80  | 110 | 83  | 79  | 62  | 64  | 39  |
| 120 | 117 | 150 | 117 | 163 | 127 | 136 | 171 | 173 | 127 |
| 40  | 55  | 59  | 78  | 92  | 86  | 73  | 69  | 75  | 43  |
| 82  | 93  | 82  | 68  | 87  | 71  | 68  | 80  | 58  | 49  |
| 79  | 68  | 92  | 111 | 122 | 131 | 179 | 161 | 160 | 105 |
| 38  | 51  | 52  | 84  | 88  | 92  | 97  | 119 | 126 | 54  |
| 62  | 82  | 105 | 135 | 183 | 176 | 180 | 197 | 186 | 109 |
| 55  | 51  | 42  | 201 | 219 | 200 | 344 | 287 | 296 | 137 |
| 49  | 61  | 57  | 89  | 133 | 98  | 173 | 175 | 168 | 88  |
| 69  | 57  | 58  | 144 | 181 | 154 | 171 | 178 | 183 | 103 |
| 61  | 55  | 58  | 129 | 179 | 125 | 148 | 136 | 149 | 72  |
| 74  | 76  | 85  | 171 | 212 | 190 | 312 | 258 | 315 | 132 |
| 45  | 44  | 56  | 87  | 114 | 106 | 104 | 106 | 120 | 57  |
| 12  | 11  | 12  | 41  | 46  | 38  | 61  | 55  | 55  | 35  |
| 68  | 79  | 78  | 213 | 296 | 225 | 288 | 262 | 328 | 120 |
| 50  | 69  | 68  | 151 | 195 | 170 | 83  | 78  | 86  | 56  |
| 75  | 88  | 83  | 139 | 165 | 176 | 71  | 66  | 84  | 53  |
| 22  | 21  | 24  | 20  | 26  | 16  | 14  | 14  | 17  | 32  |
| 29  | 24  | 27  | 34  | 37  | 33  | 29  | 26  | 32  | 25  |
| 18  | 21  | 26  | 26  | 50  | 46  | 18  | 16  | 24  | 21  |
| 38  | 31  | 20  | 46  | 73  | 61  | 46  | 48  | 57  | 36  |
| 47  | 34  | 39  | 84  | 124 | 121 | 99  | 106 | 105 | 62  |
| 51  | 44  | 39  | 34  | 55  | 46  | 58  | 40  | 44  | 26  |
| 35  | 32  | 29  | 55  | 58  | 51  | 44  | 43  | 52  | 38  |



|     |     |     |     |     |     |     |     |     |     |
|-----|-----|-----|-----|-----|-----|-----|-----|-----|-----|
| 19  | 22  | 31  | 23  | 31  | 18  | 9   | 8   | 5   | 26  |
| 33  | 32  | 25  | 37  | 42  | 25  | 22  | 24  | 21  | 19  |
| 29  | 25  | 41  | 42  | 60  | 54  | 33  | 26  | 44  | 35  |
| 38  | 34  | 38  | 38  | 38  | 41  | 34  | 33  | 41  | 38  |
| 19  | 27  | 28  | 199 | 244 | 164 | 110 | 97  | 92  | 48  |
| 45  | 43  | 56  | 372 | 479 | 430 | 439 | 383 | 457 | 209 |
| 49  | 66  | 74  | 496 | 663 | 602 | 433 | 405 | 426 | 206 |
| 9   | 6   | 2   | 47  | 57  | 27  | 42  | 20  | 26  | 14  |
| 31  | 32  | 25  | 206 | 246 | 227 | 202 | 184 | 179 | 73  |
| 51  | 60  | 47  | 74  | 105 | 105 | 83  | 64  | 87  | 57  |
| 22  | 31  | 25  | 50  | 46  | 43  | 53  | 32  | 40  | 27  |
| 50  | 59  | 44  | 59  | 90  | 82  | 61  | 58  | 65  | 49  |
| 45  | 58  | 66  | 114 | 114 | 117 | 90  | 74  | 92  | 58  |
| 39  | 29  | 46  | 85  | 93  | 98  | 88  | 73  | 79  | 53  |
| 47  | 47  | 48  | 59  | 86  | 82  | 72  | 63  | 59  | 46  |
| 26  | 27  | 26  | 33  | 55  | 27  | 36  | 44  | 46  | 23  |
| 13  | 6   | 9   | 11  | 7   | 8   | 8   | 7   | 12  | 9   |
| 60  | 57  | 81  | 89  | 97  | 89  | 107 | 86  | 108 | 73  |
| 91  | 85  | 104 | 117 | 113 | 92  | 144 | 128 | 125 | 77  |
| 55  | 64  | 69  | 50  | 69  | 52  | 77  | 59  | 53  | 64  |
| 59  | 58  | 66  | 80  | 105 | 103 | 100 | 112 | 109 | 67  |
| 63  | 66  | 69  | 115 | 111 | 124 | 126 | 103 | 144 | 70  |
| 109 | 91  | 84  | 109 | 132 | 134 | 155 | 148 | 127 | 71  |
| 63  | 84  | 66  | 49  | 69  | 43  | 84  | 68  | 74  | 80  |
| 99  | 88  | 95  | 56  | 84  | 72  | 113 | 118 | 141 | 90  |
| 20  | 21  | 22  | 19  | 16  | 18  | 26  | 17  | 27  | 18  |
| 23  | 20  | 22  | 37  | 43  | 43  | 35  | 33  | 29  | 27  |
| 34  | 40  | 37  | 82  | 91  | 61  | 66  | 50  | 59  | 33  |
| 75  | 64  | 65  | 53  | 71  | 67  | 95  | 75  | 75  | 64  |
| 50  | 45  | 43  | 47  | 74  | 53  | 48  | 50  | 40  | 52  |
| 46  | 52  | 60  | 80  | 94  | 83  | 64  | 66  | 93  | 58  |
| 52  | 31  | 59  | 76  | 94  | 73  | 74  | 61  | 53  | 50  |
| 23  | 31  | 30  | 39  | 43  | 33  | 49  | 49  | 39  | 32  |
| 47  | 49  | 62  | 170 | 212 | 198 | 196 | 202 | 208 | 60  |
| 51  | 69  | 75  | 238 | 297 | 231 | 199 | 171 | 181 | 101 |
| 42  | 33  | 40  | 101 | 144 | 145 | 135 | 101 | 122 | 57  |
| 79  | 104 | 93  | 68  | 115 | 90  | 83  | 75  | 79  | 56  |
| 37  | 40  | 49  | 55  | 54  | 60  | 71  | 75  | 57  | 39  |
| 59  | 63  | 65  | 123 | 163 | 132 | 94  | 73  | 93  | 60  |
| 60  | 54  | 59  | 324 | 412 | 356 | 296 | 241 | 279 | 148 |
| 78  | 57  | 68  | 137 | 157 | 157 | 142 | 128 | 139 | 65  |

|     |     |     |     |     |     |     |     |     |     |
|-----|-----|-----|-----|-----|-----|-----|-----|-----|-----|
| 9   | 11  | 13  | 8   | 18  | 11  | 14  | 10  | 12  | 16  |
| 95  | 96  | 96  | 108 | 151 | 102 | 116 | 120 | 143 | 85  |
| 22  | 20  | 13  | 16  | 21  | 15  | 12  | 12  | 16  | 15  |
| 31  | 36  | 45  | 37  | 58  | 45  | 48  | 29  | 45  | 36  |
| 14  | 17  | 18  | 19  | 13  | 26  | 12  | 29  | 20  | 24  |
| 74  | 61  | 58  | 43  | 52  | 51  | 44  | 51  | 36  | 68  |
| 50  | 44  | 50  | 29  | 33  | 32  | 31  | 30  | 30  | 28  |
| 40  | 47  | 50  | 53  | 72  | 62  | 40  | 38  | 37  | 42  |
| 42  | 41  | 42  | 96  | 114 | 95  | 73  | 80  | 72  | 62  |
| 61  | 67  | 62  | 139 | 180 | 130 | 108 | 103 | 93  | 85  |
| 60  | 54  | 67  | 89  | 128 | 111 | 79  | 71  | 85  | 58  |
| 83  | 107 | 93  | 99  | 108 | 128 | 165 | 146 | 172 | 110 |
| 110 | 107 | 112 | 45  | 78  | 71  | 87  | 86  | 77  | 94  |
| 86  | 98  | 115 | 55  | 82  | 64  | 100 | 81  | 112 | 91  |
| 50  | 45  | 60  | 48  | 69  | 59  | 91  | 73  | 84  | 45  |
| 58  | 64  | 69  | 70  | 82  | 83  | 136 | 116 | 112 | 74  |
| 87  | 83  | 107 | 217 | 284 | 238 | 317 | 314 | 350 | 149 |
| 59  | 50  | 65  | 79  | 122 | 84  | 92  | 101 | 95  | 48  |
| 34  | 24  | 62  | 33  | 47  | 40  | 39  | 27  | 30  | 21  |
| 34  | 25  | 33  | 50  | 61  | 62  | 49  | 57  | 36  | 47  |
| 51  | 42  | 46  | 80  | 98  | 91  | 78  | 100 | 90  | 50  |
| 0   | 5   | 6   | 3   | 2   | 1   | 1   | 3   | 7   | 3   |
| 16  | 15  | 5   | 20  | 29  | 11  | 14  | 13  | 19  | 18  |
| 9   | 13  | 7   | 38  | 38  | 49  | 24  | 18  | 18  | 10  |
| 40  | 37  | 43  | 77  | 99  | 87  | 83  | 83  | 102 | 49  |
| 51  | 57  | 55  | 86  | 122 | 98  | 115 | 114 | 107 | 72  |
| 55  | 61  | 52  | 128 | 152 | 142 | 188 | 127 | 140 | 67  |
| 7   | 10  | 11  | 26  | 34  | 17  | 32  | 27  | 30  | 10  |
| 10  | 17  | 19  | 16  | 34  | 35  | 21  | 22  | 38  | 18  |
| 27  | 29  | 25  | 56  | 43  | 69  | 76  | 43  | 63  | 32  |
| 46  | 52  | 61  | 163 | 226 | 197 | 186 | 177 | 208 | 84  |
| 39  | 44  | 51  | 110 | 148 | 117 | 103 | 120 | 108 | 55  |
| 41  | 36  | 44  | 81  | 127 | 117 | 105 | 89  | 102 | 62  |
| 34  | 37  | 32  | 100 | 118 | 95  | 96  | 88  | 96  | 53  |
| 53  | 58  | 48  | 48  | 54  | 57  | 75  | 59  | 71  | 42  |
| 67  | 75  | 91  | 81  | 123 | 84  | 109 | 101 | 87  | 58  |
| 65  | 73  | 83  | 102 | 133 | 123 | 130 | 117 | 160 | 83  |
| 33  | 32  | 34  | 49  | 73  | 53  | 57  | 63  | 57  | 31  |
| 42  | 53  | 50  | 53  | 71  | 52  | 67  | 73  | 85  | 57  |
| 61  | 59  | 59  | 118 | 176 | 162 | 202 | 197 | 207 | 95  |
| 63  | 53  | 68  | 79  | 104 | 93  | 64  | 58  | 64  | 67  |

|     |     |     |     |     |     |     |     |     |     |
|-----|-----|-----|-----|-----|-----|-----|-----|-----|-----|
| 19  | 16  | 27  | 83  | 116 | 119 | 104 | 115 | 110 | 38  |
| 54  | 64  | 83  | 120 | 150 | 138 | 82  | 97  | 93  | 70  |
| 59  | 50  | 56  | 60  | 60  | 70  | 61  | 39  | 57  | 60  |
| 23  | 21  | 25  | 33  | 52  | 36  | 22  | 30  | 33  | 31  |
| 101 | 97  | 92  | 63  | 111 | 88  | 122 | 106 | 100 | 61  |
| 87  | 91  | 111 | 146 | 201 | 183 | 156 | 165 | 169 | 105 |
| 20  | 19  | 23  | 70  | 92  | 63  | 47  | 41  | 38  | 23  |
| 55  | 58  | 71  | 96  | 115 | 132 | 91  | 91  | 91  | 80  |
| 79  | 122 | 102 | 130 | 118 | 126 | 149 | 136 | 157 | 97  |
| 81  | 86  | 80  | 87  | 129 | 121 | 129 | 120 | 127 | 73  |
| 60  | 55  | 61  | 108 | 100 | 91  | 100 | 70  | 85  | 52  |
| 34  | 45  | 48  | 72  | 106 | 86  | 49  | 51  | 52  | 28  |
| 65  | 66  | 99  | 104 | 138 | 118 | 91  | 89  | 88  | 51  |
| 47  | 42  | 51  | 52  | 52  | 66  | 57  | 49  | 63  | 45  |
| 36  | 32  | 38  | 53  | 71  | 79  | 42  | 45  | 58  | 27  |
| 48  | 36  | 55  | 158 | 207 | 185 | 151 | 156 | 190 | 98  |
| 53  | 49  | 60  | 161 | 198 | 198 | 222 | 187 | 194 | 95  |
| 26  | 26  | 23  | 29  | 57  | 50  | 36  | 39  | 49  | 27  |
| 46  | 51  | 49  | 90  | 114 | 101 | 98  | 94  | 119 | 60  |
| 22  | 19  | 17  | 6   | 5   | 16  | 10  | 9   | 10  | 15  |
| 40  | 36  | 40  | 43  | 65  | 49  | 44  | 42  | 56  | 36  |
| 19  | 27  | 21  | 16  | 16  | 18  | 29  | 17  | 22  | 24  |
| 20  | 40  | 27  | 30  | 44  | 37  | 28  | 32  | 31  | 20  |
| 68  | 77  | 72  | 112 | 135 | 117 | 111 | 79  | 91  | 59  |
| 31  | 27  | 30  | 69  | 95  | 52  | 49  | 49  | 53  | 28  |
| 70  | 63  | 64  | 77  | 126 | 107 | 74  | 87  | 83  | 62  |
| 51  | 40  | 68  | 123 | 147 | 109 | 149 | 122 | 137 | 76  |
| 20  | 27  | 16  | 58  | 67  | 75  | 36  | 32  | 40  | 19  |
| 17  | 10  | 22  | 22  | 24  | 30  | 14  | 19  | 11  | 14  |
| 14  | 27  | 26  | 45  | 52  | 50  | 37  | 29  | 33  | 19  |
| 41  | 43  | 40  | 70  | 75  | 50  | 45  | 38  | 54  | 30  |
| 28  | 44  | 40  | 68  | 90  | 70  | 87  | 71  | 86  | 41  |
| 26  | 31  | 39  | 61  | 63  | 59  | 34  | 35  | 39  | 24  |
| 57  | 43  | 54  | 86  | 102 | 85  | 96  | 95  | 103 | 79  |
| 13  | 17  | 12  | 24  | 23  | 29  | 24  | 18  | 26  | 11  |
| 27  | 28  | 30  | 49  | 68  | 56  | 81  | 68  | 67  | 36  |
| 36  | 42  | 39  | 79  | 93  | 89  | 88  | 80  | 75  | 46  |
| 28  | 23  | 27  | 109 | 173 | 120 | 103 | 70  | 83  | 37  |
| 66  | 56  | 54  | 87  | 101 | 96  | 74  | 59  | 77  | 50  |
| 36  | 48  | 55  | 58  | 68  | 60  | 71  | 79  | 68  | 49  |
| 22  | 28  | 11  | 38  | 44  | 40  | 37  | 34  | 45  | 20  |

|     |     |     |     |     |     |     |     |     |     |
|-----|-----|-----|-----|-----|-----|-----|-----|-----|-----|
| 69  | 73  | 68  | 68  | 84  | 75  | 95  | 103 | 103 | 96  |
| 35  | 37  | 48  | 72  | 99  | 81  | 89  | 81  | 89  | 60  |
| 50  | 57  | 50  | 63  | 94  | 99  | 74  | 72  | 92  | 69  |
| 54  | 57  | 65  | 35  | 45  | 57  | 62  | 60  | 52  | 41  |
| 68  | 64  | 73  | 67  | 83  | 51  | 62  | 47  | 57  | 42  |
| 53  | 65  | 52  | 70  | 73  | 68  | 88  | 78  | 60  | 59  |
| 73  | 65  | 68  | 94  | 120 | 113 | 108 | 98  | 128 | 82  |
| 61  | 65  | 70  | 89  | 118 | 98  | 125 | 101 | 125 | 78  |
| 63  | 49  | 65  | 121 | 144 | 132 | 119 | 132 | 113 | 91  |
| 60  | 47  | 57  | 75  | 73  | 59  | 116 | 102 | 101 | 79  |
| 106 | 95  | 139 | 114 | 147 | 115 | 125 | 112 | 94  | 109 |
| 53  | 54  | 51  | 71  | 97  | 72  | 69  | 65  | 75  | 50  |
| 38  | 31  | 39  | 65  | 64  | 71  | 45  | 40  | 42  | 37  |
| 28  | 27  | 34  | 43  | 70  | 58  | 44  | 43  | 59  | 28  |
| 44  | 37  | 45  | 68  | 59  | 55  | 52  | 45  | 43  | 33  |
| 44  | 45  | 60  | 59  | 66  | 60  | 55  | 55  | 51  | 31  |
| 48  | 48  | 71  | 35  | 40  | 30  | 44  | 39  | 28  | 41  |
| 34  | 51  | 60  | 58  | 54  | 49  | 45  | 42  | 45  | 47  |
| 35  | 30  | 44  | 51  | 71  | 77  | 70  | 66  | 80  | 49  |
| 28  | 28  | 23  | 31  | 39  | 29  | 17  | 33  | 28  | 18  |
| 92  | 101 | 78  | 98  | 119 | 116 | 111 | 123 | 124 | 91  |
| 47  | 61  | 67  | 48  | 82  | 57  | 67  | 62  | 59  | 54  |
| 54  | 51  | 54  | 40  | 58  | 52  | 40  | 44  | 42  | 45  |
| 56  | 65  | 60  | 82  | 85  | 84  | 70  | 57  | 67  | 49  |
| 75  | 99  | 96  | 119 | 164 | 150 | 160 | 148 | 177 | 116 |
| 48  | 51  | 48  | 67  | 95  | 71  | 74  | 48  | 85  | 47  |
| 30  | 21  | 33  | 52  | 63  | 55  | 38  | 23  | 43  | 28  |
| 37  | 43  | 46  | 44  | 65  | 58  | 47  | 59  | 49  | 39  |
| 10  | 17  | 12  | 5   | 14  | 11  | 18  | 20  | 16  | 11  |
| 30  | 30  | 34  | 61  | 80  | 65  | 60  | 58  | 44  | 38  |
| 56  | 43  | 38  | 72  | 105 | 78  | 84  | 76  | 101 | 43  |
| 62  | 62  | 83  | 117 | 147 | 135 | 149 | 154 | 139 | 93  |
| 66  | 73  | 63  | 92  | 122 | 123 | 115 | 106 | 107 | 75  |
| 86  | 103 | 103 | 95  | 138 | 115 | 146 | 146 | 143 | 94  |
| 17  | 15  | 18  | 21  | 16  | 14  | 31  | 30  | 19  | 14  |
| 62  | 59  | 74  | 53  | 70  | 62  | 91  | 70  | 75  | 37  |
| 23  | 27  | 22  | 42  | 63  | 45  | 62  | 42  | 60  | 31  |
| 73  | 79  | 63  | 47  | 67  | 52  | 53  | 58  | 66  | 66  |
| 48  | 36  | 39  | 84  | 123 | 116 | 166 | 149 | 168 | 59  |
| 43  | 50  | 47  | 77  | 100 | 79  | 113 | 85  | 106 | 50  |
| 46  | 47  | 49  | 54  | 54  | 59  | 59  | 47  | 60  | 45  |

|     |     |     |     |     |     |     |     |     |     |
|-----|-----|-----|-----|-----|-----|-----|-----|-----|-----|
| 29  | 24  | 32  | 29  | 44  | 34  | 54  | 47  | 49  | 37  |
| 38  | 42  | 43  | 46  | 59  | 52  | 58  | 49  | 61  | 36  |
| 48  | 59  | 49  | 65  | 89  | 69  | 112 | 91  | 89  | 77  |
| 18  | 26  | 17  | 13  | 26  | 19  | 41  | 27  | 23  | 26  |
| 64  | 63  | 47  | 69  | 112 | 92  | 86  | 83  | 77  | 57  |
| 45  | 42  | 35  | 39  | 53  | 37  | 53  | 51  | 50  | 36  |
| 33  | 43  | 42  | 54  | 49  | 50  | 82  | 69  | 80  | 50  |
| 24  | 31  | 35  | 65  | 74  | 65  | 27  | 48  | 34  | 42  |
| 57  | 57  | 58  | 55  | 74  | 64  | 56  | 60  | 58  | 39  |
| 75  | 82  | 99  | 68  | 109 | 86  | 87  | 84  | 75  | 66  |
| 21  | 15  | 13  | 25  | 34  | 43  | 35  | 33  | 50  | 26  |
| 54  | 43  | 56  | 45  | 63  | 62  | 59  | 64  | 48  | 50  |
| 17  | 16  | 15  | 12  | 25  | 19  | 14  | 8   | 20  | 10  |
| 31  | 34  | 49  | 27  | 32  | 40  | 38  | 34  | 40  | 27  |
| 124 | 101 | 88  | 163 | 189 | 179 | 260 | 278 | 283 | 156 |
| 56  | 61  | 56  | 53  | 58  | 62  | 56  | 46  | 48  | 41  |
| 28  | 39  | 31  | 42  | 49  | 38  | 35  | 34  | 37  | 18  |
| 52  | 64  | 56  | 58  | 75  | 57  | 87  | 71  | 85  | 53  |
| 20  | 29  | 29  | 54  | 55  | 52  | 38  | 36  | 56  | 33  |
| 33  | 43  | 63  | 47  | 48  | 53  | 55  | 51  | 46  | 47  |
| 34  | 23  | 38  | 63  | 57  | 64  | 60  | 47  | 46  | 39  |
| 79  | 73  | 67  | 98  | 143 | 131 | 144 | 148 | 162 | 82  |
| 41  | 50  | 50  | 93  | 85  | 72  | 87  | 78  | 78  | 48  |
| 36  | 40  | 44  | 55  | 95  | 72  | 103 | 105 | 85  | 46  |
| 36  | 30  | 35  | 37  | 54  | 47  | 39  | 39  | 37  | 32  |
| 43  | 54  | 51  | 78  | 74  | 82  | 59  | 66  | 60  | 50  |
| 23  | 30  | 21  | 42  | 73  | 48  | 25  | 35  | 32  | 27  |
| 23  | 16  | 20  | 31  | 43  | 31  | 20  | 22  | 25  | 16  |
| 32  | 43  | 38  | 48  | 73  | 60  | 34  | 36  | 38  | 26  |
| 37  | 50  | 52  | 50  | 73  | 37  | 45  | 36  | 55  | 39  |
| 24  | 15  | 25  | 27  | 26  | 25  | 18  | 13  | 14  | 18  |
| 24  | 24  | 21  | 46  | 46  | 40  | 17  | 26  | 22  | 21  |
| 41  | 46  | 57  | 106 | 113 | 89  | 96  | 60  | 92  | 51  |
| 5   | 12  | 14  | 15  | 24  | 19  | 10  | 10  | 14  | 13  |
| 23  | 35  | 28  | 23  | 37  | 34  | 23  | 22  | 27  | 23  |
| 32  | 36  | 38  | 50  | 80  | 67  | 45  | 55  | 41  | 40  |
| 36  | 37  | 40  | 48  | 64  | 46  | 37  | 38  | 32  | 25  |
| 107 | 101 | 149 | 266 | 361 | 338 | 351 | 333 | 343 | 224 |
| 26  | 30  | 29  | 150 | 185 | 172 | 126 | 125 | 122 | 59  |
| 13  | 21  | 27  | 65  | 80  | 54  | 64  | 63  | 58  | 30  |
| 44  | 41  | 49  | 347 | 460 | 404 | 298 | 247 | 261 | 109 |

|     |     |     |     |     |     |     |     |     |     |
|-----|-----|-----|-----|-----|-----|-----|-----|-----|-----|
| 34  | 31  | 42  | 42  | 53  | 41  | 35  | 27  | 23  | 26  |
| 37  | 27  | 40  | 46  | 77  | 49  | 38  | 31  | 41  | 24  |
| 51  | 31  | 46  | 69  | 74  | 80  | 37  | 38  | 33  | 40  |
| 36  | 31  | 31  | 47  | 51  | 59  | 29  | 28  | 31  | 34  |
| 26  | 16  | 28  | 39  | 42  | 37  | 21  | 24  | 18  | 17  |
| 18  | 16  | 21  | 31  | 50  | 37  | 22  | 21  | 16  | 22  |
| 52  | 68  | 66  | 89  | 103 | 88  | 76  | 62  | 70  | 55  |
| 66  | 35  | 55  | 135 | 148 | 141 | 154 | 139 | 167 | 57  |
| 83  | 85  | 98  | 92  | 112 | 98  | 118 | 101 | 107 | 86  |
| 92  | 73  | 81  | 152 | 249 | 172 | 239 | 204 | 215 | 107 |
| 55  | 63  | 50  | 74  | 113 | 104 | 98  | 96  | 112 | 52  |
| 22  | 14  | 21  | 19  | 29  | 22  | 25  | 14  | 16  | 17  |
| 56  | 62  | 66  | 98  | 117 | 106 | 105 | 105 | 106 | 63  |
| 53  | 44  | 51  | 240 | 336 | 284 | 236 | 183 | 235 | 100 |
| 32  | 28  | 37  | 295 | 387 | 305 | 282 | 234 | 291 | 126 |
| 9   | 14  | 15  | 56  | 50  | 41  | 16  | 14  | 18  | 11  |
| 6   | 4   | 6   | 12  | 20  | 10  | 3   | 4   | 9   | 1   |
| 48  | 39  | 50  | 95  | 122 | 97  | 119 | 94  | 103 | 69  |
| 13  | 12  | 22  | 45  | 54  | 41  | 26  | 9   | 16  | 12  |
| 8   | 14  | 5   | 65  | 99  | 60  | 35  | 35  | 35  | 11  |
| 14  | 10  | 20  | 52  | 73  | 50  | 23  | 21  | 20  | 10  |
| 19  | 12  | 22  | 43  | 49  | 35  | 15  | 21  | 21  | 12  |
| 9   | 17  | 18  | 22  | 36  | 19  | 14  | 18  | 20  | 20  |
| 14  | 15  | 23  | 39  | 44  | 25  | 24  | 16  | 16  | 15  |
| 21  | 30  | 34  | 67  | 99  | 77  | 73  | 56  | 60  | 23  |
| 23  | 21  | 27  | 43  | 45  | 49  | 36  | 43  | 22  | 26  |
| 80  | 101 | 86  | 103 | 110 | 95  | 166 | 113 | 135 | 90  |
| 54  | 65  | 82  | 96  | 94  | 110 | 134 | 90  | 105 | 49  |
| 40  | 29  | 48  | 99  | 130 | 111 | 148 | 128 | 163 | 60  |
| 32  | 27  | 20  | 41  | 51  | 47  | 43  | 33  | 46  | 35  |
| 35  | 30  | 31  | 54  | 57  | 55  | 28  | 45  | 45  | 40  |
| 135 | 143 | 137 | 159 | 234 | 204 | 267 | 263 | 285 | 164 |
| 43  | 37  | 44  | 62  | 82  | 84  | 66  | 55  | 93  | 51  |
| 36  | 40  | 54  | 85  | 111 | 77  | 77  | 68  | 69  | 56  |
| 43  | 57  | 57  | 124 | 124 | 117 | 163 | 138 | 145 | 69  |
| 43  | 36  | 48  | 87  | 125 | 86  | 91  | 72  | 85  | 64  |
| 34  | 24  | 49  | 67  | 84  | 79  | 52  | 47  | 52  | 39  |
| 82  | 73  | 102 | 140 | 160 | 131 | 160 | 166 | 162 | 98  |
| 48  | 40  | 32  | 50  | 72  | 58  | 45  | 39  | 41  | 44  |
| 39  | 48  | 50  | 48  | 69  | 57  | 71  | 67  | 62  | 59  |
| 48  | 41  | 49  | 63  | 80  | 63  | 70  | 56  | 81  | 46  |

|     |     |     |     |     |     |     |     |     |     |
|-----|-----|-----|-----|-----|-----|-----|-----|-----|-----|
| 32  | 30  | 32  | 28  | 51  | 47  | 43  | 33  | 30  | 45  |
| 96  | 101 | 71  | 150 | 168 | 154 | 156 | 113 | 126 | 93  |
| 38  | 43  | 42  | 48  | 62  | 40  | 37  | 42  | 35  | 28  |
| 52  | 47  | 53  | 48  | 41  | 42  | 51  | 38  | 40  | 43  |
| 49  | 48  | 61  | 138 | 197 | 160 | 145 | 144 | 175 | 70  |
| 29  | 46  | 37  | 53  | 75  | 73  | 91  | 72  | 75  | 59  |
| 75  | 52  | 74  | 211 | 261 | 243 | 342 | 315 | 292 | 119 |
| 54  | 60  | 51  | 109 | 109 | 109 | 73  | 88  | 59  | 49  |
| 64  | 52  | 63  | 91  | 158 | 141 | 87  | 77  | 98  | 47  |
| 42  | 38  | 41  | 80  | 104 | 87  | 75  | 68  | 82  | 36  |
| 43  | 38  | 41  | 33  | 45  | 33  | 43  | 38  | 41  | 33  |
| 38  | 33  | 33  | 32  | 32  | 32  | 30  | 28  | 16  | 23  |
| 41  | 48  | 35  | 49  | 55  | 51  | 43  | 36  | 41  | 44  |
| 50  | 53  | 41  | 58  | 77  | 72  | 46  | 46  | 41  | 37  |
| 31  | 24  | 28  | 71  | 52  | 58  | 54  | 45  | 51  | 30  |
| 51  | 36  | 37  | 77  | 113 | 73  | 73  | 78  | 85  | 45  |
| 39  | 46  | 62  | 106 | 131 | 98  | 104 | 103 | 100 | 64  |
| 147 | 164 | 151 | 203 | 284 | 241 | 446 | 428 | 414 | 226 |
| 75  | 76  | 70  | 93  | 109 | 98  | 82  | 62  | 77  | 55  |
| 48  | 62  | 59  | 83  | 97  | 86  | 50  | 42  | 53  | 36  |
| 24  | 32  | 22  | 28  | 33  | 39  | 38  | 40  | 57  | 38  |
| 21  | 23  | 33  | 45  | 45  | 41  | 67  | 47  | 72  | 28  |
| 30  | 35  | 44  | 32  | 33  | 24  | 32  | 28  | 30  | 32  |
| 21  | 24  | 30  | 84  | 135 | 96  | 86  | 79  | 107 | 39  |
| 20  | 17  | 14  | 6   | 12  | 13  | 9   | 8   | 11  | 9   |
| 37  | 28  | 46  | 80  | 90  | 96  | 60  | 62  | 62  | 43  |
| 37  | 42  | 47  | 68  | 86  | 74  | 72  | 58  | 71  | 39  |
| 18  | 26  | 30  | 34  | 60  | 53  | 32  | 21  | 26  | 25  |
| 13  | 12  | 21  | 25  | 34  | 24  | 25  | 20  | 27  | 16  |
| 15  | 22  | 21  | 32  | 41  | 26  | 25  | 27  | 31  | 16  |
| 17  | 21  | 20  | 56  | 53  | 52  | 34  | 31  | 33  | 9   |
| 67  | 40  | 61  | 105 | 126 | 93  | 94  | 93  | 97  | 61  |
| 12  | 21  | 16  | 35  | 38  | 33  | 46  | 36  | 42  | 29  |
| 18  | 20  | 25  | 24  | 31  | 19  | 28  | 22  | 27  | 25  |
| 34  | 52  | 47  | 45  | 55  | 43  | 41  | 41  | 49  | 36  |
| 30  | 29  | 34  | 40  | 51  | 38  | 38  | 31  | 32  | 24  |
| 44  | 48  | 53  | 99  | 94  | 83  | 83  | 68  | 85  | 51  |
| 76  | 80  | 72  | 136 | 169 | 146 | 107 | 93  | 116 | 80  |
| 112 | 112 | 106 | 136 | 127 | 134 | 132 | 121 | 166 | 128 |
| 37  | 39  | 56  | 66  | 85  | 70  | 74  | 75  | 84  | 48  |
| 64  | 59  | 60  | 72  | 72  | 70  | 59  | 59  | 69  | 59  |

|     |     |     |     |     |     |     |     |     |     |
|-----|-----|-----|-----|-----|-----|-----|-----|-----|-----|
| 59  | 50  | 61  | 162 | 197 | 162 | 154 | 143 | 136 | 85  |
| 69  | 68  | 79  | 147 | 173 | 162 | 150 | 129 | 129 | 91  |
| 48  | 50  | 51  | 89  | 116 | 138 | 132 | 106 | 120 | 43  |
| 45  | 29  | 56  | 90  | 100 | 99  | 96  | 74  | 73  | 49  |
| 75  | 78  | 74  | 143 | 166 | 164 | 129 | 138 | 117 | 80  |
| 43  | 36  | 35  | 23  | 44  | 21  | 37  | 31  | 39  | 40  |
| 75  | 53  | 73  | 44  | 51  | 51  | 39  | 42  | 38  | 53  |
| 44  | 34  | 42  | 109 | 158 | 122 | 112 | 93  | 112 | 52  |
| 58  | 64  | 78  | 70  | 68  | 67  | 68  | 52  | 60  | 60  |
| 37  | 23  | 33  | 19  | 15  | 28  | 24  | 21  | 25  | 23  |
| 19  | 34  | 30  | 22  | 48  | 40  | 48  | 40  | 41  | 21  |
| 50  | 49  | 50  | 47  | 94  | 67  | 75  | 57  | 71  | 58  |
| 109 | 113 | 126 | 126 | 165 | 155 | 230 | 234 | 257 | 141 |
| 37  | 27  | 30  | 25  | 43  | 30  | 24  | 23  | 23  | 33  |
| 35  | 33  | 36  | 71  | 63  | 74  | 60  | 74  | 67  | 35  |
| 31  | 33  | 47  | 70  | 106 | 83  | 97  | 75  | 79  | 58  |
| 43  | 44  | 33  | 34  | 49  | 35  | 41  | 40  | 35  | 32  |
| 32  | 43  | 37  | 64  | 90  | 60  | 58  | 50  | 59  | 36  |
| 47  | 41  | 40  | 58  | 62  | 60  | 64  | 45  | 76  | 41  |
| 27  | 8   | 21  | 48  | 55  | 66  | 56  | 36  | 47  | 26  |
| 97  | 90  | 106 | 130 | 149 | 149 | 120 | 99  | 127 | 73  |
| 49  | 64  | 89  | 98  | 135 | 140 | 79  | 82  | 97  | 65  |
| 38  | 52  | 37  | 83  | 99  | 107 | 57  | 60  | 64  | 48  |
| 20  | 34  | 25  | 25  | 23  | 28  | 31  | 20  | 24  | 23  |
| 46  | 50  | 41  | 111 | 160 | 146 | 160 | 153 | 180 | 86  |
| 32  | 34  | 43  | 18  | 24  | 13  | 22  | 28  | 34  | 23  |
| 43  | 42  | 34  | 18  | 30  | 28  | 40  | 39  | 32  | 20  |
| 32  | 34  | 25  | 14  | 15  | 2   | 16  | 12  | 8   | 22  |
| 42  | 38  | 39  | 43  | 46  | 38  | 70  | 64  | 68  | 37  |
| 21  | 7   | 20  | 5   | 5   | 6   | 8   | 13  | 9   | 12  |
| 31  | 36  | 30  | 38  | 46  | 46  | 42  | 37  | 48  | 31  |
| 15  | 18  | 22  | 9   | 7   | 6   | 10  | 7   | 7   | 12  |
| 28  | 28  | 26  | 28  | 35  | 34  | 40  | 20  | 21  | 18  |
| 40  | 43  | 35  | 32  | 32  | 26  | 45  | 29  | 37  | 27  |
| 16  | 13  | 17  | 8   | 12  | 7   | 13  | 16  | 20  | 14  |
| 29  | 24  | 37  | 56  | 68  | 68  | 55  | 47  | 62  | 45  |
| 25  | 20  | 24  | 11  | 18  | 8   | 15  | 10  | 16  | 24  |
| 11  | 25  | 26  | 31  | 45  | 35  | 15  | 23  | 22  | 22  |
| 46  | 67  | 65  | 116 | 157 | 127 | 40  | 55  | 67  | 45  |
| 62  | 53  | 79  | 187 | 267 | 246 | 125 | 131 | 143 | 95  |
| 82  | 61  | 86  | 179 | 305 | 238 | 94  | 104 | 99  | 76  |



|    |    |     |     |     |     |     |     |     |     |
|----|----|-----|-----|-----|-----|-----|-----|-----|-----|
| 13 | 8  | 7   | 27  | 20  | 37  | 6   | 14  | 12  | 4   |
| 51 | 61 | 64  | 131 | 161 | 169 | 50  | 52  | 53  | 40  |
| 25 | 19 | 25  | 30  | 51  | 29  | 21  | 15  | 12  | 23  |
| 35 | 26 | 40  | 42  | 45  | 42  | 36  | 27  | 40  | 27  |
| 23 | 12 | 21  | 71  | 80  | 68  | 59  | 45  | 58  | 31  |
| 53 | 67 | 47  | 115 | 158 | 165 | 156 | 119 | 149 | 78  |
| 35 | 41 | 33  | 73  | 89  | 82  | 66  | 66  | 76  | 43  |
| 37 | 37 | 51  | 104 | 147 | 103 | 98  | 95  | 102 | 60  |
| 38 | 39 | 37  | 60  | 71  | 65  | 53  | 65  | 59  | 38  |
| 5  | 2  | 3   | 1   | 1   | 4   | 7   | 9   | 5   | 8   |
| 75 | 59 | 82  | 148 | 156 | 177 | 174 | 127 | 140 | 94  |
| 68 | 95 | 91  | 66  | 91  | 101 | 97  | 81  | 85  | 66  |
| 28 | 27 | 34  | 41  | 70  | 51  | 34  | 35  | 39  | 42  |
| 43 | 46 | 37  | 47  | 55  | 60  | 38  | 41  | 47  | 42  |
| 61 | 69 | 76  | 57  | 63  | 51  | 43  | 48  | 59  | 59  |
| 30 | 39 | 35  | 44  | 51  | 41  | 50  | 53  | 45  | 29  |
| 75 | 73 | 63  | 68  | 77  | 73  | 60  | 55  | 51  | 60  |
| 23 | 24 | 40  | 40  | 41  | 46  | 38  | 30  | 29  | 33  |
| 53 | 54 | 69  | 67  | 80  | 74  | 64  | 81  | 88  | 50  |
| 15 | 13 | 24  | 12  | 23  | 16  | 10  | 12  | 14  | 12  |
| 26 | 33 | 27  | 30  | 47  | 30  | 33  | 30  | 40  | 22  |
| 25 | 22 | 30  | 38  | 42  | 37  | 34  | 33  | 27  | 22  |
| 24 | 27 | 32  | 33  | 44  | 33  | 34  | 34  | 41  | 44  |
| 28 | 32 | 28  | 28  | 25  | 23  | 22  | 28  | 21  | 28  |
| 39 | 38 | 31  | 57  | 83  | 84  | 94  | 85  | 71  | 49  |
| 51 | 45 | 54  | 91  | 110 | 96  | 120 | 94  | 99  | 66  |
| 97 | 91 | 102 | 109 | 121 | 126 | 136 | 131 | 138 | 113 |
| 38 | 45 | 52  | 55  | 52  | 52  | 38  | 43  | 52  | 40  |
| 40 | 33 | 32  | 36  | 32  | 38  | 32  | 22  | 34  | 33  |
| 53 | 66 | 61  | 74  | 102 | 118 | 88  | 109 | 113 | 65  |
| 8  | 13 | 18  | 11  | 25  | 21  | 16  | 19  | 13  | 13  |
| 33 | 26 | 29  | 30  | 39  | 33  | 43  | 30  | 52  | 20  |
| 27 | 17 | 31  | 69  | 81  | 65  | 80  | 77  | 70  | 43  |
| 42 | 33 | 31  | 88  | 124 | 111 | 123 | 106 | 96  | 53  |
| 53 | 67 | 49  | 128 | 176 | 152 | 155 | 165 | 178 | 78  |
| 30 | 49 | 58  | 64  | 78  | 60  | 66  | 66  | 70  | 48  |
| 55 | 60 | 53  | 96  | 97  | 89  | 88  | 77  | 104 | 57  |
| 35 | 36 | 43  | 79  | 85  | 102 | 88  | 88  | 94  | 53  |
| 53 | 68 | 65  | 103 | 117 | 107 | 122 | 86  | 93  | 67  |
| 46 | 32 | 28  | 78  | 79  | 65  | 52  | 63  | 56  | 34  |
| 45 | 45 | 43  | 110 | 116 | 97  | 105 | 84  | 97  | 64  |

|     |     |     |     |     |     |     |     |     |     |
|-----|-----|-----|-----|-----|-----|-----|-----|-----|-----|
| 51  | 64  | 47  | 64  | 77  | 46  | 57  | 37  | 58  | 33  |
| 35  | 22  | 36  | 40  | 66  | 64  | 43  | 32  | 49  | 27  |
| 68  | 60  | 68  | 68  | 70  | 70  | 80  | 67  | 86  | 58  |
| 109 | 104 | 95  | 72  | 92  | 110 | 176 | 167 | 174 | 107 |
| 79  | 78  | 93  | 73  | 107 | 72  | 155 | 168 | 180 | 77  |
| 32  | 29  | 24  | 30  | 32  | 39  | 54  | 43  | 41  | 33  |
| 136 | 127 | 151 | 105 | 147 | 134 | 203 | 209 | 240 | 124 |
| 27  | 28  | 33  | 65  | 102 | 68  | 68  | 62  | 61  | 33  |
| 46  | 35  | 50  | 105 | 131 | 118 | 101 | 93  | 106 | 62  |
| 30  | 30  | 40  | 116 | 145 | 125 | 127 | 127 | 149 | 52  |
| 53  | 50  | 55  | 100 | 153 | 133 | 104 | 108 | 101 | 62  |
| 23  | 30  | 25  | 40  | 50  | 54  | 34  | 23  | 25  | 23  |
| 27  | 18  | 25  | 18  | 23  | 22  | 31  | 22  | 28  | 15  |
| 20  | 29  | 22  | 47  | 44  | 41  | 45  | 42  | 53  | 19  |
| 14  | 24  | 22  | 5   | 27  | 21  | 20  | 14  | 16  | 22  |
| 30  | 26  | 25  | 27  | 25  | 16  | 24  | 20  | 26  | 24  |
| 32  | 23  | 28  | 25  | 33  | 30  | 29  | 19  | 35  | 40  |
| 30  | 29  | 39  | 39  | 44  | 41  | 38  | 36  | 27  | 43  |
| 41  | 39  | 32  | 33  | 28  | 32  | 35  | 17  | 27  | 19  |
| 42  | 44  | 41  | 39  | 48  | 36  | 52  | 53  | 47  | 29  |
| 70  | 87  | 87  | 56  | 56  | 61  | 59  | 48  | 49  | 50  |
| 93  | 98  | 91  | 196 | 229 | 206 | 140 | 126 | 146 | 112 |
| 47  | 45  | 67  | 57  | 93  | 68  | 53  | 61  | 75  | 58  |
| 112 | 93  | 116 | 74  | 98  | 94  | 62  | 50  | 53  | 37  |
| 101 | 93  | 110 | 55  | 76  | 53  | 43  | 39  | 49  | 36  |
| 105 | 103 | 104 | 62  | 61  | 68  | 47  | 54  | 55  | 46  |
| 79  | 69  | 65  | 87  | 73  | 100 | 92  | 113 | 94  | 73  |
| 96  | 107 | 102 | 53  | 65  | 75  | 54  | 59  | 71  | 42  |
| 74  | 87  | 94  | 76  | 83  | 78  | 103 | 92  | 103 | 59  |
| 148 | 163 | 156 | 143 | 184 | 162 | 141 | 142 | 181 | 112 |
| 52  | 61  | 52  | 41  | 63  | 47  | 50  | 40  | 67  | 37  |
| 192 | 203 | 219 | 132 | 167 | 143 | 92  | 80  | 100 | 57  |
| 88  | 105 | 105 | 58  | 85  | 79  | 67  | 52  | 59  | 30  |
| 86  | 78  | 85  | 162 | 197 | 175 | 175 | 154 | 173 | 91  |
| 32  | 24  | 43  | 28  | 42  | 45  | 67  | 55  | 48  | 29  |
| 52  | 43  | 76  | 104 | 117 | 102 | 85  | 75  | 70  | 49  |
| 46  | 38  | 52  | 75  | 102 | 76  | 74  | 68  | 75  | 57  |
| 29  | 31  | 25  | 35  | 34  | 45  | 36  | 29  | 32  | 33  |
| 63  | 77  | 86  | 194 | 258 | 234 | 211 | 193 | 196 | 90  |
| 43  | 32  | 37  | 78  | 117 | 92  | 71  | 71  | 67  | 43  |
| 29  | 23  | 26  | 37  | 26  | 36  | 53  | 37  | 40  | 29  |

|     |     |     |     |     |     |     |     |     |     |
|-----|-----|-----|-----|-----|-----|-----|-----|-----|-----|
| 63  | 41  | 75  | 73  | 79  | 67  | 69  | 65  | 64  | 56  |
| 50  | 37  | 48  | 95  | 114 | 112 | 102 | 101 | 94  | 33  |
| 44  | 43  | 49  | 53  | 45  | 40  | 41  | 35  | 28  | 26  |
| 67  | 61  | 81  | 89  | 89  | 98  | 116 | 104 | 97  | 53  |
| 60  | 37  | 61  | 69  | 90  | 78  | 64  | 67  | 81  | 47  |
| 37  | 37  | 41  | 52  | 62  | 45  | 29  | 26  | 31  | 25  |
| 20  | 27  | 22  | 36  | 47  | 57  | 29  | 29  | 29  | 38  |
| 45  | 41  | 55  | 59  | 59  | 52  | 46  | 38  | 52  | 30  |
| 39  | 45  | 54  | 41  | 63  | 39  | 41  | 35  | 42  | 31  |
| 61  | 39  | 48  | 55  | 63  | 61  | 36  | 28  | 33  | 38  |
| 46  | 43  | 48  | 122 | 172 | 162 | 166 | 158 | 134 | 72  |
| 70  | 65  | 56  | 109 | 176 | 155 | 143 | 148 | 140 | 80  |
| 26  | 30  | 27  | 54  | 64  | 67  | 59  | 65  | 51  | 32  |
| 50  | 65  | 49  | 245 | 296 | 255 | 215 | 164 | 176 | 97  |
| 26  | 32  | 43  | 120 | 170 | 135 | 81  | 76  | 86  | 44  |
| 64  | 46  | 58  | 122 | 150 | 125 | 127 | 117 | 126 | 63  |
| 24  | 26  | 33  | 54  | 73  | 69  | 44  | 41  | 39  | 33  |
| 27  | 30  | 36  | 39  | 60  | 46  | 51  | 33  | 32  | 42  |
| 43  | 42  | 38  | 49  | 74  | 48  | 59  | 45  | 48  | 42  |
| 29  | 39  | 40  | 59  | 81  | 58  | 53  | 51  | 59  | 44  |
| 30  | 26  | 32  | 51  | 48  | 58  | 47  | 44  | 52  | 37  |
| 32  | 28  | 47  | 38  | 34  | 35  | 48  | 39  | 37  | 33  |
| 80  | 66  | 97  | 96  | 159 | 125 | 142 | 155 | 185 | 116 |
| 69  | 69  | 55  | 90  | 117 | 99  | 103 | 95  | 82  | 66  |
| 42  | 44  | 42  | 80  | 58  | 67  | 64  | 48  | 66  | 42  |
| 50  | 33  | 63  | 102 | 123 | 93  | 91  | 64  | 78  | 59  |
| 80  | 89  | 88  | 139 | 149 | 121 | 127 | 134 | 139 | 95  |
| 47  | 46  | 47  | 60  | 88  | 68  | 57  | 65  | 92  | 47  |
| 42  | 33  | 29  | 49  | 49  | 56  | 64  | 41  | 63  | 33  |
| 53  | 62  | 59  | 91  | 98  | 88  | 83  | 73  | 66  | 67  |
| 39  | 41  | 37  | 57  | 76  | 61  | 63  | 48  | 54  | 50  |
| 135 | 130 | 128 | 106 | 102 | 88  | 148 | 111 | 124 | 111 |
| 50  | 76  | 66  | 76  | 75  | 87  | 73  | 76  | 75  | 62  |
| 67  | 71  | 79  | 54  | 43  | 55  | 45  | 54  | 59  | 68  |
| 95  | 105 | 108 | 95  | 96  | 100 | 82  | 75  | 79  | 75  |
| 104 | 91  | 86  | 554 | 695 | 611 | 817 | 777 | 818 | 384 |
| 42  | 62  | 43  | 19  | 32  | 36  | 28  | 25  | 28  | 26  |
| 93  | 98  | 113 | 89  | 111 | 102 | 93  | 93  | 96  | 71  |
| 60  | 77  | 76  | 37  | 49  | 52  | 40  | 40  | 37  | 51  |
| 45  | 46  | 50  | 28  | 36  | 34  | 32  | 28  | 35  | 32  |
| 24  | 14  | 11  | 29  | 49  | 32  | 28  | 22  | 24  | 12  |

|    |    |    |     |     |     |     |     |     |     |
|----|----|----|-----|-----|-----|-----|-----|-----|-----|
| 76 | 69 | 62 | 41  | 68  | 52  | 60  | 42  | 50  | 39  |
| 33 | 36 | 35 | 43  | 63  | 52  | 45  | 49  | 54  | 35  |
| 10 | 10 | 13 | 31  | 42  | 31  | 25  | 39  | 41  | 22  |
| 26 | 25 | 38 | 24  | 27  | 32  | 43  | 24  | 37  | 28  |
| 53 | 45 | 59 | 51  | 76  | 61  | 71  | 62  | 69  | 59  |
| 53 | 47 | 58 | 57  | 84  | 79  | 79  | 54  | 66  | 44  |
| 11 | 7  | 12 | 0   | 4   | 2   | 2   | 1   | 2   | 2   |
| 55 | 48 | 52 | 88  | 72  | 69  | 55  | 49  | 66  | 49  |
| 23 | 34 | 26 | 39  | 36  | 33  | 27  | 39  | 27  | 22  |
| 21 | 20 | 17 | 9   | 11  | 8   | 11  | 11  | 21  | 17  |
| 18 | 22 | 23 | 24  | 32  | 28  | 31  | 30  | 32  | 29  |
| 30 | 34 | 49 | 27  | 36  | 36  | 27  | 31  | 42  | 42  |
| 34 | 27 | 39 | 13  | 20  | 23  | 25  | 24  | 31  | 16  |
| 19 | 17 | 29 | 60  | 84  | 81  | 71  | 88  | 85  | 34  |
| 51 | 58 | 50 | 92  | 76  | 90  | 95  | 72  | 74  | 58  |
| 45 | 46 | 43 | 78  | 112 | 106 | 104 | 80  | 101 | 59  |
| 21 | 27 | 24 | 18  | 21  | 23  | 18  | 10  | 21  | 20  |
| 20 | 30 | 28 | 54  | 78  | 44  | 19  | 21  | 30  | 16  |
| 28 | 21 | 22 | 23  | 35  | 40  | 20  | 18  | 25  | 20  |
| 36 | 38 | 41 | 61  | 61  | 51  | 58  | 63  | 59  | 35  |
| 26 | 27 | 31 | 22  | 29  | 18  | 22  | 15  | 16  | 20  |
| 53 | 33 | 39 | 30  | 37  | 35  | 20  | 30  | 50  | 39  |
| 41 | 46 | 33 | 65  | 94  | 102 | 125 | 112 | 104 | 50  |
| 28 | 16 | 28 | 14  | 31  | 26  | 20  | 24  | 29  | 19  |
| 46 | 47 | 38 | 21  | 13  | 20  | 19  | 18  | 25  | 29  |
| 48 | 69 | 50 | 44  | 55  | 43  | 44  | 45  | 46  | 56  |
| 42 | 38 | 56 | 23  | 31  | 30  | 27  | 27  | 18  | 18  |
| 37 | 46 | 32 | 14  | 17  | 12  | 21  | 20  | 25  | 27  |
| 8  | 6  | 13 | 14  | 7   | 9   | 14  | 9   | 13  | 7   |
| 36 | 40 | 27 | 32  | 42  | 31  | 29  | 34  | 29  | 31  |
| 30 | 20 | 26 | 64  | 74  | 76  | 78  | 68  | 78  | 46  |
| 33 | 17 | 29 | 28  | 33  | 30  | 33  | 40  | 34  | 20  |
| 17 | 12 | 12 | 5   | 5   | 4   | 6   | 10  | 4   | 8   |
| 33 | 33 | 24 | 71  | 76  | 71  | 79  | 65  | 59  | 45  |
| 34 | 31 | 37 | 32  | 33  | 45  | 35  | 43  | 45  | 37  |
| 57 | 52 | 65 | 83  | 105 | 101 | 117 | 110 | 106 | 70  |
| 36 | 35 | 32 | 63  | 62  | 59  | 56  | 47  | 42  | 28  |
| 63 | 54 | 69 | 193 | 263 | 241 | 245 | 213 | 244 | 127 |
| 60 | 51 | 59 | 40  | 55  | 35  | 70  | 92  | 59  | 41  |
| 63 | 69 | 96 | 57  | 81  | 95  | 111 | 97  | 99  | 64  |
| 67 | 62 | 60 | 83  | 84  | 81  | 102 | 103 | 94  | 66  |

|     |     |     |     |     |     |     |     |     |     |
|-----|-----|-----|-----|-----|-----|-----|-----|-----|-----|
| 66  | 52  | 57  | 46  | 70  | 72  | 74  | 73  | 81  | 39  |
| 114 | 137 | 114 | 159 | 192 | 169 | 133 | 130 | 125 | 64  |
| 62  | 53  | 50  | 141 | 171 | 165 | 135 | 151 | 162 | 70  |
| 11  | 9   | 13  | 18  | 33  | 9   | 10  | 9   | 13  | 11  |
| 76  | 55  | 68  | 109 | 126 | 94  | 72  | 74  | 78  | 44  |
| 62  | 48  | 60  | 74  | 76  | 88  | 68  | 58  | 67  | 39  |
| 32  | 25  | 34  | 44  | 45  | 41  | 31  | 22  | 30  | 35  |
| 32  | 26  | 32  | 49  | 76  | 50  | 53  | 46  | 57  | 18  |
| 28  | 29  | 30  | 37  | 44  | 37  | 45  | 33  | 34  | 22  |
| 22  | 27  | 21  | 52  | 50  | 39  | 47  | 53  | 59  | 22  |
| 46  | 37  | 46  | 56  | 75  | 72  | 53  | 47  | 59  | 44  |
| 47  | 48  | 59  | 93  | 104 | 86  | 68  | 68  | 88  | 63  |
| 43  | 47  | 33  | 29  | 42  | 30  | 37  | 25  | 33  | 27  |
| 22  | 18  | 35  | 64  | 63  | 57  | 76  | 64  | 66  | 47  |
| 26  | 33  | 22  | 14  | 20  | 20  | 15  | 13  | 16  | 19  |
| 16  | 30  | 23  | 10  | 15  | 16  | 10  | 8   | 6   | 24  |
| 47  | 35  | 28  | 30  | 35  | 22  | 36  | 28  | 37  | 31  |
| 38  | 49  | 46  | 57  | 66  | 60  | 76  | 68  | 90  | 54  |
| 74  | 84  | 86  | 209 | 300 | 256 | 272 | 238 | 253 | 117 |
| 51  | 51  | 66  | 77  | 113 | 117 | 79  | 108 | 94  | 79  |
| 60  | 64  | 63  | 114 | 148 | 136 | 137 | 126 | 121 | 65  |
| 93  | 81  | 77  | 120 | 148 | 125 | 150 | 148 | 125 | 104 |
| 17  | 14  | 23  | 12  | 21  | 16  | 9   | 15  | 15  | 13  |
| 68  | 57  | 68  | 87  | 101 | 74  | 62  | 70  | 72  | 47  |
| 38  | 44  | 39  | 36  | 50  | 40  | 48  | 31  | 48  | 36  |
| 30  | 34  | 36  | 32  | 39  | 21  | 32  | 26  | 27  | 19  |
| 19  | 12  | 26  | 20  | 25  | 29  | 23  | 19  | 27  | 23  |
| 24  | 21  | 38  | 33  | 31  | 44  | 27  | 30  | 25  | 30  |
| 35  | 32  | 46  | 38  | 67  | 57  | 53  | 60  | 69  | 32  |
| 78  | 82  | 86  | 111 | 126 | 107 | 108 | 82  | 110 | 60  |
| 29  | 35  | 50  | 50  | 55  | 46  | 62  | 49  | 57  | 36  |
| 15  | 4   | 7   | 39  | 39  | 48  | 48  | 37  | 45  | 15  |
| 54  | 68  | 70  | 120 | 176 | 168 | 151 | 157 | 175 | 90  |
| 23  | 15  | 30  | 52  | 48  | 42  | 42  | 48  | 29  | 28  |
| 97  | 79  | 88  | 196 | 214 | 210 | 154 | 122 | 141 | 79  |
| 49  | 62  | 50  | 123 | 178 | 141 | 117 | 110 | 118 | 58  |
| 37  | 34  | 42  | 24  | 28  | 20  | 29  | 42  | 46  | 35  |
| 47  | 43  | 52  | 46  | 49  | 48  | 41  | 40  | 41  | 37  |
| 19  | 20  | 21  | 13  | 12  | 9   | 15  | 13  | 12  | 15  |
| 58  | 52  | 42  | 72  | 85  | 84  | 101 | 72  | 116 | 50  |
| 29  | 34  | 39  | 61  | 100 | 83  | 74  | 88  | 70  | 49  |

|     |     |     |     |     |     |     |     |     |     |
|-----|-----|-----|-----|-----|-----|-----|-----|-----|-----|
| 59  | 57  | 70  | 77  | 107 | 109 | 87  | 71  | 87  | 54  |
| 110 | 86  | 92  | 101 | 139 | 109 | 139 | 124 | 140 | 121 |
| 49  | 43  | 44  | 40  | 63  | 61  | 56  | 37  | 60  | 46  |
| 47  | 47  | 54  | 97  | 113 | 98  | 101 | 97  | 87  | 54  |
| 75  | 80  | 68  | 74  | 102 | 91  | 75  | 85  | 77  | 61  |
| 28  | 38  | 44  | 68  | 88  | 84  | 67  | 65  | 77  | 52  |
| 48  | 48  | 52  | 66  | 79  | 72  | 59  | 51  | 51  | 57  |
| 51  | 40  | 32  | 89  | 108 | 84  | 85  | 84  | 99  | 51  |
| 22  | 31  | 34  | 45  | 68  | 75  | 44  | 39  | 46  | 35  |
| 18  | 22  | 22  | 20  | 25  | 26  | 12  | 17  | 22  | 15  |
| 27  | 19  | 27  | 21  | 28  | 14  | 20  | 24  | 18  | 31  |
| 122 | 144 | 138 | 115 | 133 | 123 | 151 | 135 | 143 | 120 |
| 37  | 33  | 32  | 138 | 176 | 148 | 153 | 142 | 139 | 65  |
| 42  | 49  | 44  | 77  | 110 | 95  | 73  | 62  | 83  | 50  |
| 32  | 30  | 32  | 35  | 44  | 46  | 54  | 34  | 30  | 29  |
| 36  | 41  | 32  | 58  | 65  | 66  | 72  | 59  | 66  | 45  |
| 57  | 60  | 62  | 74  | 73  | 72  | 74  | 63  | 78  | 59  |
| 45  | 46  | 52  | 44  | 74  | 72  | 70  | 54  | 46  | 48  |
| 37  | 44  | 36  | 48  | 70  | 55  | 69  | 63  | 66  | 34  |
| 49  | 48  | 51  | 151 | 205 | 146 | 195 | 175 | 201 | 102 |
| 44  | 36  | 42  | 53  | 61  | 50  | 55  | 52  | 53  | 34  |
| 30  | 42  | 38  | 56  | 60  | 48  | 60  | 64  | 66  | 30  |
| 32  | 26  | 50  | 53  | 71  | 59  | 65  | 61  | 52  | 35  |
| 91  | 98  | 92  | 61  | 65  | 71  | 89  | 55  | 85  | 92  |
| 38  | 51  | 54  | 95  | 119 | 104 | 94  | 86  | 122 | 60  |
| 38  | 42  | 63  | 67  | 79  | 73  | 68  | 45  | 62  | 49  |
| 91  | 89  | 95  | 71  | 87  | 65  | 62  | 56  | 74  | 59  |
| 82  | 71  | 58  | 43  | 56  | 66  | 57  | 53  | 55  | 64  |
| 44  | 43  | 48  | 39  | 47  | 43  | 36  | 31  | 47  | 41  |
| 47  | 44  | 45  | 39  | 45  | 45  | 35  | 40  | 43  | 40  |
| 52  | 41  | 60  | 54  | 76  | 61  | 45  | 66  | 51  | 54  |
| 46  | 52  | 50  | 63  | 66  | 80  | 44  | 62  | 45  | 58  |
| 58  | 53  | 74  | 40  | 56  | 48  | 52  | 47  | 46  | 31  |
| 90  | 125 | 115 | 120 | 157 | 142 | 164 | 179 | 169 | 87  |
| 118 | 141 | 154 | 81  | 98  | 72  | 69  | 58  | 83  | 61  |
| 56  | 75  | 72  | 58  | 61  | 55  | 84  | 83  | 76  | 37  |
| 96  | 73  | 64  | 88  | 121 | 109 | 132 | 96  | 106 | 73  |
| 67  | 74  | 77  | 79  | 90  | 78  | 82  | 72  | 69  | 50  |
| 103 | 75  | 116 | 89  | 105 | 89  | 83  | 76  | 121 | 72  |
| 57  | 65  | 65  | 99  | 135 | 120 | 117 | 80  | 111 | 65  |
| 91  | 85  | 82  | 60  | 89  | 75  | 75  | 68  | 77  | 55  |

|     |     |     |     |     |     |     |     |     |     |
|-----|-----|-----|-----|-----|-----|-----|-----|-----|-----|
| 41  | 56  | 45  | 37  | 54  | 49  | 67  | 83  | 78  | 56  |
| 62  | 58  | 49  | 132 | 181 | 152 | 145 | 126 | 160 | 77  |
| 79  | 74  | 59  | 77  | 82  | 80  | 101 | 72  | 92  | 63  |
| 49  | 35  | 28  | 38  | 53  | 52  | 17  | 22  | 22  | 28  |
| 57  | 60  | 54  | 49  | 38  | 42  | 47  | 40  | 40  | 53  |
| 84  | 97  | 100 | 32  | 45  | 46  | 61  | 54  | 49  | 81  |
| 75  | 78  | 87  | 72  | 57  | 57  | 69  | 67  | 79  | 76  |
| 98  | 113 | 90  | 70  | 101 | 76  | 96  | 86  | 105 | 83  |
| 47  | 69  | 67  | 83  | 140 | 127 | 160 | 144 | 161 | 79  |
| 38  | 38  | 35  | 88  | 96  | 80  | 83  | 71  | 69  | 39  |
| 65  | 65  | 59  | 78  | 112 | 84  | 132 | 114 | 109 | 55  |
| 90  | 74  | 84  | 99  | 102 | 90  | 76  | 64  | 70  | 57  |
| 114 | 128 | 130 | 115 | 149 | 121 | 121 | 124 | 153 | 59  |
| 133 | 130 | 139 | 114 | 173 | 164 | 169 | 156 | 170 | 100 |
| 28  | 32  | 42  | 83  | 117 | 88  | 65  | 45  | 64  | 38  |
| 24  | 33  | 23  | 21  | 30  | 28  | 20  | 14  | 19  | 14  |
| 38  | 44  | 50  | 69  | 80  | 96  | 67  | 40  | 48  | 36  |
| 81  | 64  | 78  | 176 | 234 | 209 | 133 | 121 | 138 | 56  |
| 63  | 69  | 97  | 55  | 66  | 42  | 71  | 66  | 80  | 43  |
| 53  | 61  | 64  | 42  | 44  | 51  | 52  | 43  | 54  | 51  |
| 37  | 33  | 34  | 40  | 46  | 46  | 28  | 33  | 34  | 27  |
| 52  | 48  | 57  | 131 | 195 | 193 | 118 | 154 | 150 | 59  |
| 34  | 44  | 32  | 208 | 264 | 211 | 179 | 141 | 174 | 73  |
| 72  | 69  | 73  | 105 | 106 | 104 | 110 | 104 | 108 | 71  |
| 82  | 62  | 67  | 116 | 129 | 89  | 125 | 115 | 131 | 75  |
| 53  | 54  | 69  | 99  | 98  | 102 | 124 | 128 | 151 | 79  |
| 46  | 62  | 72  | 164 | 192 | 168 | 217 | 227 | 231 | 112 |
| 43  | 47  | 51  | 91  | 90  | 69  | 99  | 73  | 77  | 47  |
| 22  | 20  | 23  | 52  | 78  | 68  | 90  | 90  | 90  | 48  |
| 27  | 47  | 49  | 60  | 71  | 83  | 78  | 116 | 127 | 70  |
| 37  | 38  | 40  | 57  | 71  | 43  | 52  | 57  | 53  | 43  |
| 62  | 57  | 78  | 85  | 88  | 96  | 101 | 105 | 102 | 74  |
| 26  | 24  | 36  | 45  | 61  | 42  | 47  | 39  | 48  | 27  |
| 60  | 67  | 54  | 118 | 132 | 139 | 204 | 207 | 212 | 116 |
| 20  | 25  | 28  | 62  | 69  | 56  | 75  | 68  | 58  | 41  |
| 17  | 12  | 15  | 12  | 12  | 11  | 9   | 14  | 13  | 14  |
| 68  | 46  | 61  | 108 | 157 | 140 | 75  | 77  | 88  | 60  |
| 72  | 76  | 65  | 137 | 167 | 143 | 173 | 141 | 184 | 102 |
| 41  | 45  | 41  | 44  | 51  | 54  | 43  | 44  | 25  | 40  |
| 44  | 37  | 45  | 105 | 125 | 98  | 97  | 66  | 102 | 51  |
| 37  | 31  | 36  | 26  | 30  | 37  | 46  | 34  | 37  | 28  |

|     |     |     |     |     |     |     |     |     |     |
|-----|-----|-----|-----|-----|-----|-----|-----|-----|-----|
| 48  | 53  | 57  | 129 | 203 | 171 | 143 | 123 | 153 | 77  |
| 20  | 17  | 16  | 61  | 77  | 67  | 29  | 27  | 42  | 33  |
| 48  | 56  | 53  | 102 | 132 | 97  | 90  | 81  | 94  | 52  |
| 19  | 25  | 29  | 11  | 11  | 14  | 21  | 12  | 14  | 26  |
| 24  | 24  | 33  | 37  | 38  | 30  | 40  | 30  | 24  | 23  |
| 24  | 29  | 17  | 51  | 62  | 64  | 56  | 49  | 59  | 32  |
| 31  | 18  | 16  | 34  | 44  | 38  | 37  | 35  | 35  | 15  |
| 30  | 55  | 42  | 30  | 34  | 23  | 40  | 27  | 52  | 29  |
| 48  | 46  | 57  | 62  | 73  | 60  | 77  | 78  | 108 | 50  |
| 48  | 29  | 35  | 41  | 64  | 39  | 45  | 34  | 42  | 53  |
| 38  | 48  | 39  | 53  | 86  | 55  | 46  | 62  | 64  | 42  |
| 21  | 28  | 35  | 39  | 38  | 36  | 29  | 20  | 36  | 22  |
| 39  | 38  | 33  | 97  | 131 | 113 | 89  | 71  | 92  | 50  |
| 20  | 22  | 16  | 35  | 30  | 38  | 57  | 23  | 28  | 21  |
| 28  | 31  | 37  | 34  | 48  | 42  | 49  | 27  | 42  | 34  |
| 40  | 38  | 47  | 109 | 120 | 120 | 102 | 105 | 97  | 62  |
| 118 | 106 | 130 | 100 | 153 | 136 | 143 | 135 | 173 | 121 |
| 44  | 36  | 60  | 47  | 71  | 60  | 62  | 55  | 65  | 51  |
| 78  | 86  | 67  | 52  | 63  | 64  | 61  | 45  | 58  | 48  |
| 40  | 52  | 54  | 44  | 53  | 58  | 47  | 42  | 35  | 36  |
| 45  | 55  | 55  | 40  | 58  | 74  | 66  | 50  | 59  | 56  |
| 74  | 58  | 55  | 67  | 99  | 78  | 67  | 76  | 94  | 59  |
| 64  | 76  | 76  | 51  | 60  | 58  | 59  | 49  | 33  | 63  |
| 36  | 41  | 47  | 47  | 58  | 43  | 60  | 51  | 49  | 43  |
| 52  | 41  | 56  | 96  | 132 | 109 | 114 | 81  | 113 | 58  |
| 22  | 34  | 46  | 42  | 54  | 52  | 52  | 36  | 43  | 31  |
| 72  | 66  | 99  | 95  | 110 | 110 | 97  | 106 | 98  | 88  |
| 27  | 26  | 33  | 72  | 91  | 70  | 58  | 78  | 71  | 37  |
| 43  | 54  | 54  | 36  | 39  | 35  | 47  | 46  | 41  | 43  |
| 55  | 59  | 59  | 65  | 109 | 76  | 84  | 87  | 93  | 70  |
| 45  | 63  | 54  | 115 | 149 | 143 | 97  | 82  | 103 | 78  |
| 30  | 24  | 28  | 175 | 252 | 186 | 186 | 161 | 193 | 95  |
| 17  | 22  | 15  | 42  | 52  | 33  | 35  | 37  | 43  | 22  |
| 33  | 26  | 19  | 56  | 75  | 57  | 53  | 52  | 60  | 31  |
| 82  | 84  | 88  | 117 | 135 | 121 | 125 | 114 | 140 | 98  |
| 44  | 41  | 44  | 77  | 84  | 70  | 67  | 76  | 79  | 46  |
| 61  | 49  | 44  | 54  | 74  | 58  | 69  | 61  | 65  | 49  |
| 43  | 39  | 43  | 55  | 50  | 61  | 73  | 69  | 72  | 56  |
| 89  | 92  | 113 | 157 | 184 | 184 | 232 | 194 | 211 | 117 |
| 21  | 16  | 19  | 24  | 34  | 33  | 20  | 18  | 23  | 18  |
| 49  | 49  | 53  | 71  | 71  | 62  | 55  | 41  | 39  | 42  |



|    |     |     |     |     |     |     |     |     |     |
|----|-----|-----|-----|-----|-----|-----|-----|-----|-----|
| 53 | 40  | 60  | 48  | 53  | 40  | 50  | 48  | 49  | 36  |
| 27 | 33  | 24  | 19  | 23  | 21  | 29  | 13  | 25  | 18  |
| 49 | 36  | 53  | 37  | 44  | 29  | 29  | 39  | 29  | 37  |
| 29 | 27  | 28  | 35  | 33  | 32  | 21  | 26  | 25  | 30  |
| 42 | 52  | 42  | 57  | 104 | 84  | 92  | 82  | 86  | 49  |
| 56 | 38  | 66  | 83  | 97  | 81  | 102 | 108 | 96  | 60  |
| 30 | 32  | 29  | 25  | 39  | 37  | 20  | 28  | 30  | 30  |
| 60 | 61  | 64  | 67  | 63  | 47  | 58  | 39  | 74  | 64  |
| 32 | 26  | 37  | 28  | 57  | 48  | 55  | 52  | 60  | 34  |
| 14 | 12  | 17  | 56  | 56  | 67  | 51  | 39  | 56  | 26  |
| 39 | 33  | 37  | 25  | 49  | 32  | 21  | 33  | 39  | 24  |
| 28 | 28  | 34  | 22  | 36  | 17  | 29  | 23  | 20  | 24  |
| 11 | 12  | 23  | 10  | 13  | 12  | 10  | 7   | 15  | 12  |
| 37 | 40  | 36  | 54  | 67  | 61  | 34  | 31  | 41  | 20  |
| 51 | 34  | 44  | 27  | 50  | 50  | 22  | 15  | 21  | 24  |
| 62 | 100 | 100 | 45  | 64  | 53  | 51  | 59  | 56  | 72  |
| 56 | 57  | 58  | 110 | 150 | 131 | 95  | 89  | 120 | 71  |
| 41 | 48  | 41  | 67  | 86  | 70  | 67  | 60  | 73  | 62  |
| 70 | 62  | 95  | 113 | 133 | 141 | 181 | 226 | 219 | 127 |
| 61 | 54  | 52  | 79  | 95  | 85  | 80  | 86  | 73  | 49  |
| 46 | 50  | 49  | 57  | 53  | 58  | 47  | 44  | 44  | 37  |
| 63 | 58  | 69  | 86  | 113 | 93  | 121 | 103 | 138 | 78  |
| 44 | 55  | 56  | 69  | 91  | 80  | 73  | 55  | 64  | 50  |
| 41 | 43  | 36  | 85  | 89  | 72  | 70  | 56  | 77  | 38  |
| 68 | 71  | 71  | 115 | 101 | 118 | 88  | 84  | 78  | 51  |
| 64 | 62  | 57  | 89  | 114 | 122 | 87  | 92  | 81  | 70  |
| 63 | 59  | 44  | 70  | 67  | 60  | 54  | 52  | 69  | 40  |
| 52 | 53  | 57  | 79  | 81  | 68  | 60  | 67  | 62  | 61  |
| 44 | 43  | 36  | 110 | 147 | 125 | 129 | 136 | 129 | 79  |
| 32 | 41  | 42  | 103 | 132 | 115 | 76  | 91  | 73  | 48  |
| 47 | 37  | 60  | 70  | 90  | 92  | 60  | 57  | 64  | 35  |
| 33 | 35  | 45  | 144 | 191 | 145 | 143 | 117 | 143 | 71  |
| 42 | 47  | 34  | 112 | 141 | 152 | 155 | 122 | 132 | 62  |
| 47 | 70  | 75  | 126 | 149 | 105 | 91  | 87  | 99  | 44  |
| 29 | 47  | 44  | 79  | 109 | 105 | 75  | 61  | 77  | 34  |
| 32 | 38  | 36  | 138 | 193 | 148 | 133 | 112 | 146 | 73  |
| 38 | 39  | 53  | 113 | 147 | 128 | 98  | 81  | 104 | 63  |
| 21 | 30  | 28  | 70  | 76  | 80  | 61  | 43  | 41  | 34  |
| 40 | 46  | 43  | 104 | 168 | 121 | 123 | 126 | 123 | 70  |
| 47 | 43  | 54  | 54  | 76  | 73  | 51  | 55  | 53  | 50  |
| 30 | 31  | 23  | 18  | 20  | 22  | 14  | 20  | 13  | 23  |

|     |     |     |     |     |     |     |     |     |     |
|-----|-----|-----|-----|-----|-----|-----|-----|-----|-----|
| 42  | 46  | 46  | 134 | 157 | 155 | 126 | 121 | 130 | 54  |
| 40  | 47  | 60  | 92  | 119 | 101 | 91  | 77  | 86  | 51  |
| 48  | 54  | 48  | 95  | 122 | 113 | 101 | 108 | 111 | 83  |
| 19  | 25  | 19  | 39  | 53  | 40  | 15  | 15  | 14  | 17  |
| 45  | 49  | 55  | 131 | 185 | 148 | 98  | 77  | 86  | 62  |
| 54  | 69  | 73  | 432 | 564 | 423 | 557 | 442 | 527 | 222 |
| 34  | 43  | 33  | 43  | 63  | 37  | 68  | 59  | 72  | 35  |
| 35  | 27  | 45  | 54  | 93  | 64  | 94  | 75  | 112 | 30  |
| 76  | 63  | 67  | 77  | 78  | 83  | 82  | 74  | 81  | 74  |
| 11  | 13  | 14  | 13  | 17  | 18  | 12  | 11  | 11  | 17  |
| 20  | 14  | 23  | 17  | 28  | 17  | 29  | 27  | 12  | 22  |
| 29  | 21  | 44  | 46  | 59  | 51  | 56  | 39  | 57  | 29  |
| 42  | 38  | 28  | 52  | 61  | 60  | 74  | 47  | 55  | 38  |
| 47  | 66  | 73  | 61  | 73  | 45  | 82  | 108 | 109 | 68  |
| 49  | 45  | 67  | 29  | 36  | 30  | 34  | 38  | 38  | 28  |
| 88  | 102 | 102 | 48  | 57  | 47  | 62  | 56  | 52  | 37  |
| 140 | 156 | 173 | 58  | 88  | 70  | 61  | 54  | 71  | 51  |
| 33  | 35  | 42  | 84  | 95  | 70  | 76  | 56  | 56  | 35  |
| 29  | 26  | 41  | 67  | 69  | 68  | 68  | 59  | 53  | 40  |
| 38  | 31  | 44  | 44  | 53  | 38  | 34  | 41  | 27  | 35  |
| 2   | 0   | 1   | 4   | 7   | 5   | 1   | 2   | 2   | 4   |
| 19  | 32  | 54  | 42  | 36  | 37  | 32  | 45  | 54  | 30  |
| 34  | 28  | 37  | 495 | 726 | 555 | 600 | 486 | 674 | 302 |
| 31  | 32  | 31  | 60  | 97  | 69  | 53  | 49  | 45  | 35  |
| 19  | 31  | 37  | 58  | 60  | 60  | 80  | 50  | 64  | 35  |
| 29  | 28  | 26  | 28  | 42  | 49  | 28  | 39  | 25  | 25  |
| 12  | 12  | 22  | 28  | 34  | 39  | 36  | 19  | 34  | 19  |
| 18  | 17  | 19  | 13  | 29  | 21  | 12  | 19  | 14  | 18  |
| 39  | 46  | 40  | 81  | 100 | 68  | 72  | 55  | 63  | 35  |
| 31  | 32  | 43  | 212 | 301 | 216 | 174 | 140 | 157 | 70  |
| 63  | 61  | 68  | 39  | 42  | 44  | 37  | 56  | 55  | 37  |
| 23  | 26  | 24  | 29  | 30  | 25  | 38  | 30  | 31  | 21  |
| 21  | 14  | 7   | 21  | 30  | 21  | 28  | 29  | 17  | 29  |
| 34  | 29  | 41  | 125 | 149 | 108 | 99  | 73  | 103 | 50  |
| 19  | 10  | 25  | 18  | 32  | 28  | 22  | 13  | 26  | 15  |
| 29  | 34  | 23  | 20  | 27  | 15  | 26  | 18  | 24  | 21  |
| 34  | 30  | 33  | 29  | 47  | 40  | 42  | 59  | 53  | 25  |
| 38  | 30  | 35  | 113 | 120 | 97  | 134 | 126 | 125 | 67  |
| 74  | 65  | 49  | 168 | 243 | 210 | 239 | 162 | 195 | 109 |
| 41  | 34  | 31  | 97  | 164 | 122 | 123 | 96  | 109 | 45  |
| 41  | 38  | 38  | 35  | 40  | 42  | 32  | 29  | 20  | 42  |

|     |     |     |     |     |     |     |     |     |     |
|-----|-----|-----|-----|-----|-----|-----|-----|-----|-----|
| 58  | 51  | 60  | 141 | 184 | 189 | 213 | 155 | 217 | 84  |
| 26  | 17  | 27  | 40  | 57  | 41  | 27  | 22  | 27  | 31  |
| 68  | 85  | 91  | 122 | 127 | 139 | 130 | 142 | 158 | 103 |
| 35  | 35  | 54  | 125 | 167 | 157 | 127 | 141 | 110 | 69  |
| 47  | 55  | 71  | 18  | 23  | 22  | 24  | 44  | 45  | 36  |
| 25  | 29  | 29  | 37  | 41  | 48  | 30  | 35  | 35  | 29  |
| 26  | 27  | 29  | 37  | 47  | 47  | 42  | 34  | 45  | 29  |
| 109 | 118 | 136 | 92  | 132 | 118 | 112 | 111 | 108 | 82  |
| 43  | 57  | 56  | 46  | 59  | 47  | 51  | 52  | 49  | 58  |
| 34  | 44  | 62  | 80  | 91  | 88  | 88  | 72  | 99  | 50  |
| 42  | 49  | 29  | 66  | 79  | 78  | 69  | 60  | 61  | 59  |
| 42  | 64  | 47  | 37  | 38  | 39  | 32  | 37  | 35  | 36  |
| 51  | 48  | 40  | 50  | 66  | 61  | 46  | 50  | 57  | 55  |
| 43  | 45  | 48  | 47  | 73  | 52  | 67  | 52  | 60  | 40  |
| 48  | 71  | 42  | 45  | 67  | 61  | 56  | 48  | 49  | 54  |
| 59  | 67  | 75  | 52  | 79  | 45  | 76  | 56  | 70  | 64  |
| 67  | 61  | 80  | 53  | 60  | 35  | 48  | 43  | 53  | 37  |
| 27  | 36  | 28  | 32  | 44  | 30  | 40  | 27  | 49  | 35  |
| 58  | 51  | 72  | 54  | 58  | 57  | 39  | 55  | 42  | 48  |
| 35  | 36  | 29  | 43  | 38  | 40  | 53  | 43  | 25  | 24  |
| 1   | 2   | 5   | 2   | 1   | 3   | 4   | 4   | 4   | 1   |
| 31  | 25  | 23  | 34  | 37  | 26  | 28  | 33  | 28  | 28  |
| 95  | 68  | 74  | 49  | 58  | 64  | 43  | 52  | 66  | 71  |
| 63  | 58  | 62  | 67  | 66  | 73  | 55  | 37  | 58  | 48  |
| 55  | 48  | 46  | 49  | 85  | 86  | 108 | 89  | 91  | 65  |
| 32  | 33  | 19  | 27  | 25  | 30  | 27  | 24  | 29  | 24  |
| 67  | 47  | 81  | 80  | 90  | 70  | 76  | 68  | 89  | 58  |
| 59  | 38  | 62  | 78  | 94  | 80  | 78  | 91  | 109 | 46  |
| 43  | 48  | 42  | 143 | 194 | 166 | 113 | 115 | 116 | 66  |
| 33  | 33  | 33  | 58  | 77  | 56  | 42  | 42  | 58  | 42  |
| 26  | 24  | 26  | 52  | 49  | 37  | 38  | 51  | 46  | 31  |
| 14  | 16  | 20  | 32  | 28  | 37  | 36  | 31  | 30  | 13  |
| 49  | 50  | 47  | 44  | 61  | 40  | 54  | 29  | 49  | 35  |
| 26  | 34  | 48  | 62  | 84  | 73  | 70  | 59  | 81  | 40  |
| 44  | 56  | 63  | 67  | 67  | 61  | 58  | 50  | 66  | 35  |
| 23  | 18  | 22  | 16  | 15  | 21  | 19  | 16  | 19  | 23  |
| 30  | 43  | 41  | 54  | 64  | 62  | 63  | 60  | 49  | 36  |
| 38  | 26  | 35  | 146 | 154 | 138 | 208 | 186 | 196 | 93  |
| 23  | 19  | 25  | 21  | 24  | 25  | 18  | 14  | 26  | 21  |
| 62  | 59  | 70  | 89  | 115 | 107 | 101 | 108 | 99  | 70  |
| 53  | 34  | 42  | 39  | 53  | 58  | 37  | 41  | 34  | 43  |

|     |     |     |     |     |     |     |     |     |     |
|-----|-----|-----|-----|-----|-----|-----|-----|-----|-----|
| 99  | 115 | 131 | 184 | 225 | 215 | 154 | 114 | 168 | 107 |
| 30  | 14  | 24  | 45  | 53  | 46  | 46  | 40  | 39  | 37  |
| 26  | 27  | 26  | 64  | 94  | 71  | 91  | 96  | 103 | 35  |
| 56  | 73  | 71  | 38  | 58  | 48  | 61  | 55  | 70  | 40  |
| 27  | 24  | 23  | 45  | 49  | 39  | 68  | 57  | 59  | 27  |
| 61  | 50  | 77  | 91  | 101 | 105 | 127 | 107 | 113 | 68  |
| 37  | 34  | 36  | 32  | 40  | 37  | 60  | 44  | 49  | 32  |
| 29  | 31  | 39  | 86  | 104 | 114 | 56  | 51  | 67  | 50  |
| 41  | 40  | 45  | 44  | 40  | 38  | 51  | 28  | 51  | 39  |
| 68  | 61  | 73  | 45  | 59  | 43  | 56  | 39  | 46  | 54  |
| 48  | 57  | 61  | 44  | 52  | 42  | 55  | 27  | 37  | 26  |
| 16  | 13  | 14  | 52  | 44  | 35  | 22  | 18  | 32  | 16  |
| 33  | 28  | 38  | 45  | 43  | 39  | 38  | 35  | 32  | 35  |
| 33  | 20  | 29  | 27  | 51  | 43  | 36  | 23  | 43  | 28  |
| 41  | 42  | 32  | 46  | 49  | 55  | 43  | 43  | 40  | 45  |
| 27  | 43  | 45  | 92  | 140 | 110 | 116 | 119 | 111 | 82  |
| 43  | 43  | 34  | 89  | 115 | 105 | 78  | 72  | 89  | 42  |
| 27  | 36  | 27  | 29  | 43  | 46  | 36  | 28  | 29  | 32  |
| 30  | 23  | 32  | 35  | 44  | 41  | 38  | 35  | 38  | 29  |
| 45  | 40  | 49  | 43  | 54  | 54  | 74  | 71  | 63  | 45  |
| 35  | 45  | 54  | 36  | 33  | 37  | 31  | 29  | 29  | 34  |
| 67  | 60  | 65  | 31  | 37  | 28  | 38  | 38  | 38  | 51  |
| 18  | 23  | 37  | 37  | 35  | 35  | 19  | 20  | 29  | 33  |
| 41  | 41  | 32  | 45  | 55  | 38  | 25  | 29  | 23  | 43  |
| 21  | 31  | 24  | 19  | 25  | 23  | 33  | 25  | 31  | 26  |
| 30  | 30  | 35  | 22  | 20  | 11  | 17  | 13  | 25  | 19  |
| 39  | 52  | 42  | 60  | 95  | 79  | 70  | 67  | 67  | 41  |
| 34  | 41  | 39  | 22  | 21  | 24  | 24  | 26  | 28  | 27  |
| 42  | 45  | 55  | 48  | 44  | 47  | 34  | 40  | 38  | 59  |
| 57  | 55  | 54  | 33  | 42  | 33  | 38  | 36  | 39  | 33  |
| 60  | 52  | 52  | 52  | 60  | 76  | 42  | 55  | 44  | 49  |
| 67  | 63  | 81  | 177 | 224 | 175 | 168 | 145 | 166 | 72  |
| 62  | 63  | 77  | 86  | 121 | 90  | 99  | 107 | 79  | 61  |
| 37  | 38  | 34  | 95  | 90  | 88  | 57  | 55  | 61  | 53  |
| 52  | 34  | 57  | 71  | 107 | 80  | 73  | 67  | 75  | 44  |
| 38  | 51  | 65  | 107 | 127 | 129 | 122 | 104 | 112 | 64  |
| 114 | 120 | 125 | 83  | 111 | 92  | 100 | 99  | 126 | 97  |
| 53  | 51  | 54  | 78  | 100 | 78  | 98  | 76  | 86  | 51  |
| 68  | 54  | 63  | 61  | 88  | 69  | 82  | 73  | 84  | 48  |
| 74  | 60  | 66  | 49  | 62  | 51  | 45  | 40  | 57  | 39  |
| 41  | 36  | 46  | 217 | 272 | 235 | 230 | 197 | 225 | 96  |

|     |     |     |     |     |     |     |     |     |     |
|-----|-----|-----|-----|-----|-----|-----|-----|-----|-----|
| 90  | 99  | 98  | 174 | 250 | 189 | 264 | 288 | 306 | 144 |
| 40  | 36  | 40  | 148 | 202 | 178 | 156 | 130 | 153 | 77  |
| 34  | 30  | 46  | 256 | 374 | 267 | 274 | 210 | 227 | 78  |
| 48  | 47  | 61  | 47  | 63  | 51  | 50  | 42  | 57  | 48  |
| 30  | 29  | 51  | 53  | 63  | 55  | 51  | 55  | 45  | 36  |
| 23  | 34  | 48  | 34  | 43  | 34  | 42  | 30  | 34  | 33  |
| 53  | 42  | 52  | 31  | 57  | 49  | 31  | 32  | 36  | 26  |
| 83  | 105 | 83  | 158 | 217 | 218 | 236 | 229 | 240 | 119 |
| 34  | 32  | 29  | 52  | 76  | 61  | 49  | 44  | 52  | 30  |
| 26  | 21  | 42  | 35  | 31  | 36  | 28  | 24  | 30  | 30  |
| 15  | 11  | 17  | 25  | 42  | 33  | 28  | 15  | 14  | 12  |
| 12  | 12  | 17  | 16  | 18  | 13  | 20  | 17  | 21  | 15  |
| 58  | 48  | 60  | 65  | 73  | 52  | 63  | 49  | 51  | 51  |
| 53  | 52  | 63  | 110 | 126 | 124 | 107 | 104 | 94  | 63  |
| 122 | 110 | 137 | 136 | 162 | 113 | 129 | 126 | 122 | 107 |
| 45  | 42  | 62  | 121 | 171 | 148 | 146 | 143 | 191 | 85  |
| 34  | 32  | 48  | 94  | 125 | 107 | 97  | 90  | 82  | 38  |
| 40  | 37  | 37  | 74  | 102 | 77  | 94  | 80  | 77  | 46  |
| 68  | 51  | 58  | 127 | 206 | 144 | 178 | 149 | 187 | 69  |
| 5   | 18  | 13  | 41  | 63  | 68  | 32  | 30  | 23  | 24  |
| 23  | 30  | 24  | 50  | 44  | 51  | 31  | 36  | 37  | 30  |
| 31  | 49  | 56  | 63  | 63  | 74  | 60  | 52  | 57  | 42  |
| 30  | 30  | 25  | 19  | 32  | 17  | 19  | 16  | 16  | 21  |
| 25  | 28  | 29  | 57  | 68  | 47  | 72  | 53  | 80  | 40  |
| 73  | 68  | 64  | 112 | 126 | 114 | 121 | 109 | 98  | 79  |
| 37  | 31  | 40  | 19  | 28  | 28  | 37  | 27  | 34  | 17  |
| 28  | 27  | 34  | 31  | 29  | 25  | 38  | 41  | 39  | 33  |
| 46  | 35  | 49  | 38  | 60  | 46  | 57  | 46  | 50  | 44  |
| 23  | 16  | 27  | 40  | 57  | 57  | 29  | 42  | 28  | 24  |
| 24  | 23  | 27  | 23  | 33  | 42  | 33  | 21  | 43  | 22  |
| 37  | 32  | 39  | 47  | 55  | 44  | 38  | 47  | 47  | 35  |
| 54  | 47  | 39  | 57  | 68  | 71  | 76  | 63  | 56  | 37  |
| 57  | 62  | 68  | 89  | 108 | 92  | 104 | 90  | 100 | 57  |
| 30  | 23  | 25  | 31  | 43  | 27  | 26  | 29  | 29  | 25  |
| 52  | 73  | 52  | 106 | 150 | 117 | 101 | 89  | 91  | 52  |
| 30  | 27  | 34  | 41  | 43  | 37  | 44  | 27  | 30  | 27  |
| 26  | 43  | 40  | 94  | 176 | 142 | 136 | 140 | 142 | 66  |
| 31  | 38  | 35  | 119 | 151 | 132 | 98  | 106 | 129 | 64  |
| 37  | 45  | 39  | 85  | 103 | 101 | 91  | 74  | 100 | 49  |
| 51  | 48  | 56  | 124 | 173 | 143 | 136 | 152 | 146 | 74  |
| 75  | 71  | 58  | 102 | 144 | 152 | 128 | 122 | 119 | 58  |

|     |    |     |     |     |     |     |     |     |     |
|-----|----|-----|-----|-----|-----|-----|-----|-----|-----|
| 61  | 67 | 81  | 75  | 87  | 96  | 74  | 68  | 74  | 73  |
| 60  | 32 | 36  | 116 | 157 | 125 | 139 | 115 | 107 | 66  |
| 41  | 61 | 52  | 115 | 155 | 154 | 111 | 127 | 113 | 72  |
| 50  | 48 | 42  | 91  | 127 | 129 | 128 | 123 | 137 | 68  |
| 74  | 70 | 93  | 39  | 60  | 53  | 55  | 49  | 58  | 58  |
| 36  | 28 | 38  | 49  | 44  | 27  | 37  | 41  | 37  | 39  |
| 38  | 31 | 43  | 58  | 78  | 81  | 65  | 40  | 50  | 24  |
| 47  | 47 | 53  | 143 | 228 | 179 | 129 | 115 | 157 | 80  |
| 52  | 62 | 47  | 40  | 57  | 47  | 53  | 50  | 54  | 49  |
| 49  | 43 | 55  | 50  | 63  | 58  | 63  | 51  | 48  | 50  |
| 54  | 38 | 39  | 62  | 68  | 63  | 62  | 68  | 55  | 45  |
| 33  | 39 | 28  | 35  | 34  | 33  | 33  | 26  | 33  | 20  |
| 32  | 40 | 37  | 50  | 42  | 40  | 44  | 40  | 37  | 33  |
| 59  | 72 | 69  | 93  | 97  | 90  | 79  | 66  | 70  | 53  |
| 28  | 24 | 37  | 91  | 107 | 85  | 86  | 72  | 90  | 45  |
| 53  | 73 | 84  | 98  | 105 | 91  | 85  | 78  | 94  | 53  |
| 26  | 19 | 29  | 29  | 50  | 52  | 37  | 20  | 23  | 20  |
| 49  | 49 | 55  | 73  | 93  | 64  | 59  | 62  | 57  | 43  |
| 18  | 27 | 32  | 38  | 58  | 55  | 31  | 28  | 27  | 23  |
| 43  | 57 | 45  | 54  | 58  | 41  | 47  | 26  | 34  | 40  |
| 31  | 45 | 49  | 405 | 570 | 487 | 376 | 356 | 415 | 148 |
| 21  | 19 | 26  | 12  | 9   | 7   | 7   | 4   | 12  | 14  |
| 27  | 29 | 27  | 35  | 32  | 36  | 24  | 27  | 22  | 25  |
| 40  | 42 | 39  | 43  | 56  | 38  | 61  | 36  | 53  | 26  |
| 9   | 3  | 8   | 11  | 22  | 12  | 4   | 7   | 9   | 4   |
| 15  | 8  | 22  | 121 | 129 | 87  | 78  | 80  | 66  | 32  |
| 30  | 36 | 29  | 45  | 55  | 65  | 75  | 55  | 67  | 39  |
| 49  | 40 | 70  | 99  | 130 | 136 | 87  | 83  | 123 | 65  |
| 29  | 19 | 25  | 33  | 55  | 44  | 69  | 53  | 52  | 38  |
| 63  | 66 | 81  | 95  | 106 | 85  | 107 | 81  | 80  | 68  |
| 36  | 35 | 54  | 99  | 106 | 92  | 103 | 86  | 92  | 52  |
| 102 | 95 | 111 | 252 | 287 | 265 | 241 | 215 | 234 | 120 |
| 33  | 24 | 33  | 45  | 40  | 44  | 36  | 40  | 40  | 27  |
| 83  | 96 | 85  | 75  | 105 | 102 | 123 | 106 | 136 | 99  |
| 54  | 61 | 68  | 102 | 123 | 107 | 113 | 86  | 83  | 74  |
| 73  | 71 | 86  | 125 | 149 | 110 | 142 | 129 | 131 | 91  |
| 8   | 12 | 7   | 6   | 12  | 17  | 10  | 13  | 13  | 8   |
| 83  | 83 | 83  | 109 | 129 | 95  | 118 | 102 | 105 | 80  |
| 71  | 84 | 60  | 62  | 84  | 80  | 96  | 85  | 102 | 65  |
| 71  | 63 | 70  | 107 | 125 | 110 | 132 | 161 | 154 | 80  |
| 89  | 87 | 98  | 214 | 276 | 243 | 275 | 219 | 259 | 145 |

|     |     |     |     |     |     |     |     |     |     |
|-----|-----|-----|-----|-----|-----|-----|-----|-----|-----|
| 100 | 95  | 109 | 126 | 119 | 118 | 112 | 122 | 135 | 95  |
| 83  | 91  | 90  | 62  | 93  | 81  | 81  | 71  | 71  | 80  |
| 61  | 62  | 75  | 107 | 106 | 115 | 132 | 85  | 86  | 70  |
| 115 | 137 | 132 | 104 | 146 | 87  | 123 | 136 | 137 | 132 |
| 38  | 36  | 51  | 122 | 120 | 108 | 116 | 92  | 119 | 75  |
| 47  | 44  | 44  | 79  | 84  | 72  | 64  | 70  | 75  | 45  |
| 49  | 46  | 53  | 79  | 116 | 86  | 101 | 91  | 110 | 54  |
| 43  | 48  | 46  | 56  | 69  | 63  | 64  | 68  | 51  | 34  |
| 60  | 57  | 77  | 109 | 134 | 119 | 119 | 151 | 127 | 86  |
| 53  | 63  | 57  | 51  | 77  | 76  | 39  | 71  | 52  | 48  |
| 26  | 33  | 37  | 26  | 27  | 27  | 17  | 17  | 13  | 32  |
| 29  | 24  | 26  | 22  | 30  | 28  | 31  | 18  | 32  | 22  |
| 80  | 97  | 80  | 351 | 489 | 445 | 511 | 500 | 515 | 247 |
| 174 | 156 | 187 | 403 | 460 | 431 | 452 | 427 | 452 | 247 |
| 40  | 48  | 38  | 127 | 171 | 127 | 118 | 83  | 123 | 55  |
| 61  | 58  | 56  | 120 | 185 | 123 | 178 | 150 | 171 | 95  |
| 71  | 79  | 70  | 181 | 292 | 215 | 220 | 221 | 224 | 118 |
| 66  | 42  | 67  | 108 | 160 | 115 | 146 | 143 | 172 | 95  |
| 52  | 37  | 56  | 161 | 225 | 213 | 176 | 172 | 145 | 68  |
| 82  | 79  | 90  | 146 | 239 | 187 | 220 | 183 | 211 | 101 |
| 78  | 67  | 75  | 183 | 246 | 229 | 193 | 179 | 192 | 101 |
| 84  | 98  | 117 | 187 | 257 | 215 | 321 | 331 | 353 | 179 |
| 44  | 61  | 44  | 151 | 222 | 198 | 281 | 223 | 247 | 110 |
| 49  | 34  | 45  | 68  | 59  | 61  | 73  | 80  | 92  | 47  |
| 22  | 29  | 21  | 73  | 81  | 75  | 66  | 73  | 67  | 28  |
| 48  | 65  | 52  | 55  | 80  | 75  | 56  | 58  | 60  | 55  |
| 82  | 66  | 66  | 34  | 45  | 42  | 69  | 52  | 69  | 52  |
| 70  | 53  | 73  | 93  | 116 | 93  | 148 | 123 | 117 | 64  |
| 48  | 56  | 41  | 54  | 79  | 94  | 118 | 97  | 97  | 65  |
| 33  | 47  | 47  | 212 | 246 | 192 | 209 | 175 | 176 | 95  |
| 38  | 42  | 52  | 54  | 46  | 57  | 56  | 41  | 49  | 39  |
| 42  | 44  | 40  | 18  | 24  | 22  | 15  | 25  | 21  | 37  |
| 57  | 52  | 76  | 75  | 92  | 59  | 63  | 60  | 59  | 45  |
| 61  | 63  | 89  | 50  | 43  | 46  | 74  | 58  | 73  | 53  |
| 34  | 27  | 36  | 34  | 32  | 42  | 37  | 26  | 25  | 40  |
| 36  | 20  | 44  | 17  | 14  | 15  | 19  | 22  | 22  | 25  |
| 45  | 43  | 51  | 45  | 45  | 38  | 35  | 26  | 32  | 43  |
| 37  | 32  | 40  | 28  | 36  | 23  | 29  | 30  | 31  | 33  |
| 44  | 50  | 51  | 68  | 77  | 79  | 69  | 61  | 85  | 63  |
| 55  | 51  | 59  | 27  | 36  | 45  | 37  | 48  | 43  | 39  |
| 47  | 47  | 51  | 55  | 65  | 53  | 48  | 44  | 46  | 46  |

|     |     |     |     |     |     |     |     |     |     |
|-----|-----|-----|-----|-----|-----|-----|-----|-----|-----|
| 29  | 29  | 48  | 65  | 106 | 102 | 80  | 83  | 84  | 36  |
| 47  | 51  | 50  | 92  | 109 | 104 | 89  | 107 | 112 | 60  |
| 44  | 40  | 55  | 86  | 102 | 78  | 129 | 91  | 110 | 54  |
| 50  | 55  | 58  | 82  | 138 | 98  | 138 | 136 | 155 | 64  |
| 68  | 53  | 77  | 80  | 119 | 95  | 89  | 93  | 92  | 68  |
| 44  | 55  | 73  | 85  | 129 | 125 | 109 | 92  | 92  | 53  |
| 57  | 66  | 53  | 69  | 93  | 66  | 93  | 75  | 79  | 50  |
| 67  | 82  | 77  | 201 | 281 | 221 | 180 | 161 | 173 | 110 |
| 50  | 48  | 33  | 56  | 103 | 85  | 85  | 91  | 81  | 47  |
| 96  | 100 | 86  | 176 | 229 | 219 | 251 | 224 | 240 | 125 |
| 112 | 100 | 121 | 191 | 265 | 207 | 326 | 306 | 332 | 153 |
| 47  | 45  | 64  | 129 | 136 | 116 | 97  | 79  | 75  | 55  |
| 57  | 82  | 65  | 83  | 101 | 91  | 108 | 93  | 71  | 52  |
| 38  | 42  | 50  | 110 | 149 | 121 | 114 | 93  | 110 | 50  |
| 30  | 28  | 34  | 66  | 80  | 71  | 73  | 66  | 78  | 38  |
| 32  | 15  | 24  | 73  | 86  | 63  | 62  | 52  | 64  | 33  |
| 37  | 48  | 45  | 100 | 126 | 87  | 75  | 85  | 81  | 51  |
| 39  | 47  | 41  | 113 | 138 | 111 | 106 | 109 | 107 | 91  |
| 27  | 34  | 41  | 75  | 85  | 90  | 94  | 76  | 99  | 31  |
| 116 | 131 | 145 | 210 | 254 | 217 | 329 | 260 | 304 | 175 |
| 12  | 16  | 25  | 31  | 35  | 20  | 30  | 33  | 33  | 22  |
| 155 | 154 | 179 | 282 | 369 | 302 | 315 | 258 | 327 | 214 |
| 62  | 62  | 54  | 126 | 167 | 157 | 100 | 100 | 125 | 71  |
| 51  | 73  | 64  | 103 | 129 | 104 | 142 | 128 | 132 | 83  |
| 124 | 135 | 138 | 149 | 205 | 209 | 166 | 175 | 157 | 140 |
| 65  | 54  | 64  | 107 | 117 | 92  | 88  | 103 | 98  | 60  |
| 105 | 127 | 138 | 90  | 143 | 124 | 147 | 137 | 177 | 132 |
| 83  | 86  | 121 | 68  | 124 | 86  | 108 | 98  | 117 | 95  |
| 112 | 103 | 116 | 121 | 172 | 151 | 171 | 177 | 186 | 108 |
| 82  | 84  | 87  | 111 | 162 | 127 | 145 | 146 | 131 | 86  |
| 131 | 92  | 129 | 143 | 200 | 166 | 194 | 176 | 192 | 123 |
| 54  | 50  | 66  | 300 | 311 | 309 | 344 | 338 | 313 | 146 |
| 49  | 48  | 53  | 149 | 205 | 195 | 198 | 151 | 176 | 73  |
| 45  | 49  | 44  | 113 | 132 | 134 | 120 | 97  | 102 | 45  |
| 51  | 50  | 55  | 88  | 84  | 96  | 89  | 84  | 100 | 55  |
| 45  | 44  | 58  | 92  | 133 | 123 | 129 | 108 | 131 | 53  |
| 70  | 83  | 75  | 116 | 158 | 106 | 105 | 106 | 101 | 39  |
| 44  | 54  | 45  | 84  | 131 | 103 | 117 | 92  | 113 | 62  |
| 130 | 105 | 120 | 132 | 177 | 158 | 143 | 116 | 129 | 77  |
| 79  | 92  | 108 | 63  | 82  | 91  | 99  | 86  | 98  | 55  |
| 42  | 49  | 53  | 119 | 127 | 119 | 106 | 72  | 103 | 45  |



|     |     |     |     |     |     |     |     |     |     |
|-----|-----|-----|-----|-----|-----|-----|-----|-----|-----|
| 49  | 58  | 53  | 61  | 95  | 69  | 73  | 64  | 68  | 46  |
| 48  | 53  | 47  | 109 | 135 | 115 | 105 | 84  | 76  | 55  |
| 46  | 54  | 50  | 51  | 73  | 61  | 78  | 61  | 74  | 42  |
| 32  | 23  | 24  | 36  | 53  | 48  | 88  | 78  | 74  | 40  |
| 42  | 30  | 37  | 61  | 78  | 78  | 81  | 89  | 90  | 55  |
| 52  | 47  | 66  | 171 | 190 | 229 | 183 | 162 | 158 | 89  |
| 50  | 53  | 42  | 93  | 124 | 94  | 112 | 94  | 112 | 68  |
| 54  | 51  | 64  | 98  | 104 | 100 | 114 | 101 | 127 | 63  |
| 40  | 52  | 49  | 282 | 385 | 356 | 375 | 302 | 401 | 178 |
| 42  | 38  | 47  | 92  | 112 | 119 | 136 | 120 | 118 | 65  |
| 54  | 49  | 53  | 115 | 153 | 141 | 167 | 154 | 150 | 72  |
| 18  | 21  | 23  | 61  | 81  | 69  | 84  | 72  | 84  | 40  |
| 44  | 39  | 43  | 223 | 296 | 248 | 233 | 227 | 252 | 125 |
| 42  | 47  | 52  | 145 | 211 | 170 | 171 | 142 | 149 | 74  |
| 23  | 11  | 16  | 26  | 33  | 30  | 27  | 31  | 37  | 17  |
| 37  | 31  | 40  | 60  | 61  | 71  | 46  | 50  | 46  | 33  |
| 31  | 44  | 51  | 38  | 50  | 37  | 59  | 43  | 64  | 32  |
| 50  | 54  | 48  | 134 | 138 | 111 | 89  | 86  | 102 | 58  |
| 59  | 61  | 60  | 94  | 114 | 114 | 90  | 81  | 92  | 61  |
| 37  | 44  | 58  | 69  | 64  | 60  | 53  | 65  | 58  | 45  |
| 48  | 41  | 44  | 46  | 59  | 65  | 55  | 54  | 51  | 44  |
| 70  | 81  | 89  | 87  | 92  | 74  | 111 | 100 | 127 | 78  |
| 29  | 25  | 42  | 64  | 99  | 80  | 85  | 73  | 63  | 63  |
| 38  | 34  | 51  | 52  | 69  | 65  | 73  | 66  | 87  | 42  |
| 63  | 64  | 67  | 121 | 181 | 121 | 192 | 144 | 208 | 93  |
| 112 | 143 | 136 | 69  | 95  | 107 | 152 | 118 | 146 | 124 |
| 41  | 55  | 52  | 48  | 86  | 61  | 95  | 63  | 71  | 50  |
| 65  | 65  | 62  | 84  | 86  | 84  | 109 | 105 | 131 | 68  |
| 63  | 57  | 65  | 118 | 166 | 153 | 168 | 128 | 144 | 77  |
| 50  | 64  | 65  | 209 | 265 | 244 | 220 | 170 | 173 | 97  |
| 35  | 21  | 28  | 51  | 71  | 50  | 54  | 54  | 36  | 29  |
| 45  | 36  | 55  | 156 | 181 | 170 | 165 | 149 | 129 | 80  |
| 42  | 47  | 63  | 147 | 151 | 126 | 174 | 165 | 183 | 88  |
| 52  | 50  | 59  | 136 | 173 | 129 | 169 | 135 | 174 | 79  |
| 46  | 35  | 43  | 94  | 135 | 110 | 98  | 95  | 81  | 50  |
| 48  | 33  | 38  | 134 | 152 | 138 | 139 | 133 | 137 | 64  |
| 40  | 51  | 40  | 80  | 99  | 115 | 77  | 62  | 86  | 53  |
| 36  | 27  | 40  | 85  | 125 | 114 | 84  | 75  | 86  | 44  |
| 43  | 51  | 56  | 67  | 74  | 55  | 65  | 71  | 75  | 51  |
| 43  | 69  | 68  | 60  | 76  | 61  | 69  | 48  | 53  | 32  |
| 65  | 62  | 56  | 75  | 97  | 89  | 79  | 64  | 82  | 59  |

|     |     |     |     |     |     |     |     |     |     |
|-----|-----|-----|-----|-----|-----|-----|-----|-----|-----|
| 15  | 17  | 17  | 18  | 30  | 30  | 16  | 15  | 21  | 17  |
| 12  | 16  | 14  | 19  | 26  | 35  | 13  | 21  | 14  | 12  |
| 15  | 15  | 25  | 44  | 55  | 36  | 26  | 18  | 26  | 16  |
| 11  | 13  | 15  | 39  | 56  | 42  | 20  | 16  | 26  | 18  |
| 44  | 25  | 35  | 94  | 106 | 86  | 78  | 75  | 78  | 44  |
| 23  | 34  | 26  | 51  | 50  | 50  | 42  | 32  | 26  | 27  |
| 8   | 14  | 16  | 18  | 34  | 26  | 20  | 14  | 17  | 18  |
| 43  | 31  | 40  | 62  | 59  | 58  | 65  | 33  | 37  | 24  |
| 111 | 102 | 124 | 139 | 164 | 162 | 90  | 110 | 111 | 110 |
| 75  | 96  | 93  | 152 | 207 | 174 | 104 | 124 | 151 | 108 |
| 77  | 80  | 96  | 77  | 81  | 77  | 128 | 112 | 140 | 101 |
| 36  | 39  | 52  | 51  | 80  | 74  | 68  | 58  | 67  | 49  |
| 43  | 61  | 57  | 106 | 142 | 152 | 93  | 86  | 77  | 61  |
| 86  | 71  | 79  | 66  | 90  | 78  | 108 | 114 | 145 | 76  |
| 37  | 38  | 62  | 56  | 81  | 67  | 71  | 64  | 72  | 47  |
| 60  | 70  | 61  | 124 | 148 | 166 | 78  | 94  | 85  | 69  |
| 42  | 56  | 69  | 120 | 139 | 135 | 143 | 94  | 130 | 78  |
| 0   | 1   | 0   | 1   | 5   | 3   | 4   | 0   | 5   | 1   |
| 16  | 16  | 17  | 16  | 23  | 20  | 14  | 14  | 18  | 14  |
| 39  | 44  | 40  | 174 | 202 | 207 | 200 | 215 | 217 | 104 |
| 61  | 46  | 44  | 66  | 93  | 79  | 55  | 55  | 60  | 45  |
| 10  | 11  | 14  | 15  | 10  | 16  | 18  | 8   | 24  | 9   |
| 23  | 38  | 45  | 42  | 60  | 42  | 34  | 28  | 37  | 32  |
| 55  | 77  | 79  | 94  | 139 | 125 | 138 | 115 | 146 | 79  |
| 40  | 39  | 49  | 53  | 70  | 72  | 53  | 60  | 71  | 54  |
| 55  | 61  | 69  | 77  | 96  | 86  | 81  | 89  | 99  | 57  |
| 57  | 47  | 55  | 55  | 50  | 45  | 50  | 51  | 65  | 46  |
| 62  | 57  | 75  | 48  | 73  | 70  | 80  | 80  | 79  | 63  |
| 33  | 38  | 48  | 46  | 78  | 53  | 45  | 38  | 51  | 35  |
| 63  | 73  | 70  | 88  | 98  | 92  | 122 | 130 | 150 | 66  |
| 31  | 42  | 46  | 20  | 20  | 37  | 29  | 38  | 37  | 41  |
| 41  | 42  | 51  | 59  | 67  | 71  | 74  | 65  | 68  | 41  |
| 48  | 28  | 44  | 43  | 48  | 28  | 37  | 44  | 45  | 33  |
| 27  | 39  | 40  | 53  | 69  | 52  | 56  | 44  | 48  | 35  |
| 52  | 40  | 55  | 70  | 85  | 62  | 80  | 75  | 81  | 45  |
| 38  | 36  | 44  | 86  | 108 | 98  | 84  | 93  | 101 | 57  |
| 97  | 101 | 84  | 123 | 172 | 162 | 191 | 168 | 196 | 127 |
| 41  | 34  | 41  | 51  | 70  | 65  | 62  | 58  | 68  | 38  |
| 84  | 70  | 87  | 118 | 144 | 130 | 200 | 173 | 163 | 78  |
| 52  | 72  | 69  | 124 | 151 | 106 | 150 | 123 | 140 | 74  |
| 48  | 53  | 48  | 155 | 196 | 161 | 166 | 168 | 161 | 59  |

|     |     |    |     |     |     |     |     |     |     |
|-----|-----|----|-----|-----|-----|-----|-----|-----|-----|
| 73  | 78  | 79 | 108 | 132 | 122 | 84  | 89  | 86  | 72  |
| 4   | 8   | 4  | 5   | 10  | 5   | 9   | 13  | 10  | 5   |
| 36  | 31  | 37 | 41  | 78  | 69  | 82  | 64  | 63  | 43  |
| 115 | 101 | 88 | 84  | 128 | 119 | 121 | 104 | 116 | 86  |
| 46  | 57  | 43 | 52  | 52  | 37  | 69  | 62  | 66  | 38  |
| 62  | 54  | 76 | 134 | 154 | 132 | 153 | 121 | 129 | 71  |
| 41  | 39  | 49 | 45  | 62  | 75  | 54  | 49  | 77  | 31  |
| 14  | 18  | 25 | 24  | 20  | 21  | 28  | 23  | 27  | 15  |
| 41  | 23  | 34 | 62  | 81  | 69  | 80  | 74  | 75  | 49  |
| 30  | 29  | 39 | 67  | 106 | 89  | 87  | 62  | 77  | 45  |
| 55  | 52  | 58 | 94  | 145 | 129 | 151 | 142 | 142 | 67  |
| 11  | 12  | 18 | 37  | 65  | 47  | 36  | 30  | 35  | 28  |
| 17  | 34  | 35 | 56  | 78  | 80  | 81  | 66  | 81  | 35  |
| 50  | 33  | 49 | 78  | 94  | 95  | 91  | 69  | 96  | 58  |
| 84  | 79  | 83 | 117 | 135 | 109 | 197 | 185 | 218 | 96  |
| 54  | 52  | 46 | 48  | 52  | 51  | 47  | 41  | 40  | 33  |
| 44  | 36  | 40 | 27  | 42  | 47  | 33  | 29  | 36  | 26  |
| 25  | 13  | 22 | 22  | 39  | 26  | 17  | 25  | 22  | 22  |
| 21  | 24  | 28 | 61  | 89  | 67  | 92  | 83  | 82  | 50  |
| 22  | 30  | 24 | 20  | 34  | 43  | 37  | 30  | 34  | 21  |
| 20  | 16  | 26 | 31  | 51  | 38  | 44  | 20  | 43  | 28  |
| 22  | 48  | 36 | 29  | 36  | 28  | 26  | 29  | 38  | 23  |
| 18  | 6   | 27 | 15  | 21  | 12  | 13  | 9   | 13  | 17  |
| 7   | 12  | 12 | 9   | 11  | 12  | 10  | 9   | 10  | 7   |
| 63  | 54  | 73 | 122 | 169 | 181 | 153 | 130 | 135 | 84  |
| 23  | 17  | 23 | 21  | 30  | 29  | 27  | 37  | 23  | 26  |
| 57  | 49  | 52 | 153 | 197 | 201 | 83  | 75  | 90  | 71  |
| 35  | 23  | 31 | 51  | 68  | 45  | 51  | 60  | 46  | 37  |
| 42  | 50  | 60 | 96  | 129 | 119 | 103 | 86  | 103 | 74  |
| 58  | 48  | 51 | 142 | 210 | 155 | 128 | 123 | 158 | 65  |
| 54  | 59  | 49 | 86  | 103 | 92  | 82  | 67  | 75  | 35  |
| 84  | 77  | 90 | 168 | 245 | 222 | 268 | 226 | 271 | 112 |
| 40  | 22  | 48 | 82  | 108 | 70  | 122 | 91  | 103 | 62  |
| 53  | 45  | 54 | 76  | 88  | 99  | 67  | 70  | 66  | 59  |
| 42  | 40  | 47 | 63  | 84  | 73  | 69  | 74  | 73  | 43  |
| 44  | 26  | 29 | 46  | 89  | 37  | 40  | 45  | 64  | 34  |
| 31  | 49  | 43 | 77  | 88  | 69  | 67  | 65  | 61  | 42  |
| 44  | 31  | 33 | 62  | 76  | 52  | 69  | 58  | 56  | 39  |
| 66  | 72  | 64 | 98  | 75  | 90  | 96  | 69  | 73  | 58  |
| 38  | 33  | 34 | 42  | 55  | 38  | 36  | 26  | 37  | 25  |
| 42  | 71  | 44 | 89  | 118 | 89  | 69  | 71  | 81  | 68  |

|     |    |     |     |     |     |     |     |     |     |
|-----|----|-----|-----|-----|-----|-----|-----|-----|-----|
| 51  | 52 | 52  | 80  | 91  | 81  | 79  | 82  | 65  | 58  |
| 47  | 65 | 52  | 92  | 100 | 87  | 85  | 77  | 72  | 52  |
| 26  | 38 | 33  | 48  | 62  | 55  | 45  | 47  | 53  | 31  |
| 44  | 67 | 73  | 83  | 111 | 100 | 88  | 94  | 114 | 65  |
| 42  | 36 | 29  | 46  | 78  | 53  | 33  | 22  | 30  | 22  |
| 62  | 78 | 73  | 123 | 134 | 121 | 97  | 71  | 77  | 63  |
| 62  | 53 | 69  | 72  | 103 | 89  | 90  | 81  | 89  | 49  |
| 44  | 50 | 44  | 53  | 61  | 52  | 41  | 33  | 41  | 27  |
| 121 | 95 | 107 | 185 | 217 | 200 | 164 | 127 | 171 | 69  |
| 34  | 32 | 29  | 43  | 74  | 58  | 34  | 25  | 28  | 22  |
| 19  | 22 | 21  | 18  | 27  | 19  | 19  | 24  | 24  | 13  |
| 69  | 85 | 64  | 148 | 171 | 132 | 141 | 130 | 141 | 76  |
| 52  | 51 | 49  | 59  | 75  | 63  | 57  | 62  | 67  | 64  |
| 48  | 61 | 41  | 67  | 74  | 64  | 61  | 58  | 70  | 54  |
| 53  | 61 | 79  | 77  | 83  | 73  | 92  | 105 | 90  | 70  |
| 28  | 15 | 26  | 29  | 49  | 47  | 40  | 41  | 47  | 36  |
| 44  | 37 | 36  | 14  | 22  | 27  | 28  | 22  | 19  | 40  |
| 20  | 28 | 20  | 17  | 32  | 18  | 30  | 22  | 34  | 29  |
| 45  | 45 | 46  | 45  | 52  | 47  | 62  | 41  | 36  | 47  |
| 50  | 39 | 54  | 41  | 49  | 46  | 30  | 39  | 38  | 37  |
| 23  | 25 | 21  | 33  | 32  | 39  | 35  | 31  | 40  | 28  |
| 39  | 25 | 34  | 59  | 76  | 66  | 70  | 67  | 55  | 49  |
| 31  | 45 | 34  | 16  | 31  | 18  | 32  | 27  | 35  | 33  |
| 79  | 70 | 64  | 166 | 216 | 176 | 214 | 200 | 225 | 119 |
| 33  | 37 | 29  | 61  | 66  | 69  | 72  | 86  | 69  | 53  |
| 71  | 61 | 74  | 63  | 59  | 59  | 71  | 67  | 80  | 79  |
| 38  | 45 | 45  | 25  | 47  | 41  | 43  | 48  | 52  | 43  |
| 37  | 33 | 33  | 38  | 38  | 51  | 43  | 52  | 45  | 29  |
| 59  | 32 | 40  | 141 | 145 | 142 | 183 | 200 | 188 | 94  |
| 27  | 32 | 35  | 22  | 21  | 21  | 29  | 33  | 30  | 30  |
| 39  | 43 | 54  | 60  | 72  | 94  | 113 | 114 | 114 | 60  |
| 37  | 46 | 57  | 82  | 99  | 104 | 96  | 80  | 103 | 65  |
| 41  | 52 | 64  | 46  | 82  | 65  | 94  | 83  | 100 | 57  |
| 32  | 43 | 43  | 69  | 80  | 75  | 49  | 53  | 68  | 33  |
| 30  | 46 | 36  | 78  | 99  | 69  | 67  | 53  | 69  | 38  |
| 31  | 39 | 49  | 71  | 75  | 72  | 59  | 56  | 43  | 37  |
| 43  | 44 | 34  | 44  | 65  | 53  | 40  | 30  | 41  | 32  |
| 41  | 50 | 44  | 51  | 57  | 72  | 51  | 50  | 37  | 45  |
| 26  | 31 | 45  | 25  | 41  | 28  | 30  | 32  | 26  | 24  |
| 37  | 32 | 45  | 34  | 49  | 30  | 36  | 43  | 29  | 34  |
| 45  | 31 | 49  | 48  | 45  | 55  | 45  | 52  | 48  | 36  |

|    |    |    |     |     |     |     |     |     |    |
|----|----|----|-----|-----|-----|-----|-----|-----|----|
| 26 | 26 | 36 | 22  | 29  | 29  | 25  | 32  | 27  | 23 |
| 49 | 47 | 45 | 153 | 188 | 148 | 156 | 131 | 154 | 74 |
| 35 | 30 | 31 | 24  | 21  | 33  | 23  | 18  | 21  | 26 |
| 29 | 29 | 41 | 34  | 48  | 27  | 34  | 32  | 37  | 20 |
| 33 | 34 | 47 | 56  | 56  | 59  | 53  | 65  | 53  | 37 |
| 44 | 42 | 52 | 60  | 49  | 52  | 44  | 49  | 54  | 41 |
| 36 | 29 | 46 | 41  | 30  | 30  | 28  | 36  | 49  | 25 |
| 14 | 13 | 5  | 11  | 13  | 13  | 12  | 14  | 17  | 11 |
| 58 | 54 | 62 | 48  | 66  | 55  | 39  | 43  | 61  | 32 |
| 26 | 33 | 32 | 30  | 35  | 35  | 20  | 28  | 23  | 34 |
| 45 | 52 | 52 | 81  | 82  | 73  | 66  | 70  | 67  | 58 |
| 78 | 54 | 82 | 107 | 122 | 122 | 157 | 116 | 132 | 77 |
| 42 | 25 | 35 | 60  | 74  | 56  | 63  | 52  | 65  | 34 |
| 42 | 58 | 63 | 76  | 93  | 75  | 101 | 89  | 74  | 59 |
| 23 | 18 | 16 | 27  | 24  | 32  | 27  | 25  | 15  | 22 |
| 28 | 38 | 27 | 67  | 87  | 73  | 73  | 71  | 70  | 58 |
| 55 | 37 | 61 | 119 | 140 | 149 | 131 | 127 | 115 | 65 |
| 83 | 54 | 73 | 94  | 131 | 105 | 168 | 224 | 173 | 81 |
| 63 | 57 | 57 | 169 | 196 | 193 | 184 | 178 | 173 | 92 |
| 45 | 45 | 41 | 75  | 108 | 88  | 116 | 98  | 109 | 48 |
| 34 | 26 | 35 | 143 | 163 | 163 | 131 | 142 | 140 | 70 |
| 18 | 13 | 27 | 50  | 45  | 40  | 67  | 54  | 67  | 30 |
| 22 | 33 | 43 | 159 | 242 | 226 | 193 | 173 | 169 | 60 |
| 36 | 22 | 31 | 58  | 96  | 69  | 56  | 69  | 63  | 41 |
| 26 | 31 | 25 | 74  | 78  | 59  | 109 | 99  | 91  | 65 |
| 34 | 30 | 37 | 76  | 123 | 87  | 78  | 79  | 94  | 39 |
| 62 | 52 | 52 | 114 | 141 | 131 | 138 | 123 | 138 | 77 |
| 27 | 26 | 27 | 8   | 6   | 11  | 10  | 9   | 8   | 20 |
| 11 | 10 | 21 | 13  | 19  | 18  | 12  | 5   | 7   | 8  |
| 58 | 50 | 58 | 39  | 49  | 46  | 49  | 50  | 56  | 50 |
| 17 | 17 | 11 | 26  | 28  | 28  | 31  | 16  | 35  | 7  |
| 36 | 40 | 26 | 35  | 54  | 34  | 36  | 30  | 35  | 26 |
| 23 | 21 | 26 | 14  | 17  | 15  | 20  | 15  | 17  | 16 |
| 22 | 16 | 26 | 15  | 8   | 22  | 24  | 22  | 21  | 19 |
| 14 | 9  | 17 | 23  | 25  | 28  | 15  | 14  | 15  | 16 |
| 27 | 30 | 30 | 61  | 75  | 45  | 37  | 38  | 43  | 21 |
| 22 | 16 | 16 | 24  | 15  | 21  | 22  | 19  | 5   | 12 |
| 22 | 32 | 34 | 31  | 29  | 28  | 25  | 27  | 31  | 25 |
| 15 | 14 | 17 | 42  | 57  | 33  | 28  | 28  | 29  | 7  |
| 31 | 34 | 36 | 73  | 75  | 70  | 56  | 75  | 71  | 38 |
| 37 | 30 | 44 | 28  | 45  | 41  | 31  | 36  | 40  | 25 |

|     |     |     |     |     |     |     |     |     |     |
|-----|-----|-----|-----|-----|-----|-----|-----|-----|-----|
| 66  | 58  | 66  | 147 | 186 | 134 | 105 | 100 | 103 | 55  |
| 29  | 17  | 32  | 53  | 55  | 42  | 40  | 32  | 32  | 30  |
| 28  | 40  | 37  | 55  | 67  | 61  | 45  | 41  | 46  | 35  |
| 16  | 20  | 23  | 28  | 27  | 37  | 23  | 27  | 28  | 22  |
| 122 | 109 | 128 | 199 | 253 | 215 | 240 | 249 | 231 | 151 |
| 109 | 98  | 121 | 81  | 109 | 70  | 135 | 118 | 122 | 111 |
| 19  | 30  | 23  | 30  | 39  | 21  | 20  | 21  | 30  | 26  |
| 27  | 38  | 31  | 42  | 49  | 40  | 35  | 31  | 35  | 35  |
| 18  | 19  | 18  | 11  | 7   | 10  | 14  | 13  | 6   | 15  |
| 27  | 38  | 32  | 42  | 40  | 43  | 32  | 33  | 28  | 27  |
| 50  | 49  | 53  | 75  | 78  | 83  | 53  | 53  | 50  | 52  |
| 34  | 37  | 35  | 40  | 65  | 68  | 45  | 38  | 52  | 43  |
| 32  | 32  | 34  | 36  | 45  | 51  | 32  | 17  | 27  | 28  |
| 39  | 39  | 38  | 75  | 91  | 73  | 49  | 43  | 55  | 27  |
| 60  | 45  | 63  | 70  | 96  | 91  | 61  | 60  | 82  | 45  |
| 32  | 39  | 37  | 69  | 98  | 81  | 52  | 67  | 46  | 41  |
| 11  | 13  | 13  | 6   | 4   | 5   | 5   | 4   | 5   | 4   |
| 54  | 54  | 57  | 82  | 117 | 63  | 85  | 77  | 75  | 50  |
| 66  | 65  | 69  | 119 | 133 | 111 | 139 | 103 | 120 | 62  |
| 34  | 26  | 34  | 49  | 44  | 33  | 35  | 32  | 41  | 28  |
| 43  | 54  | 52  | 89  | 103 | 97  | 59  | 64  | 66  | 53  |
| 42  | 56  | 52  | 101 | 109 | 99  | 83  | 102 | 93  | 56  |
| 54  | 41  | 54  | 112 | 137 | 114 | 89  | 82  | 97  | 57  |
| 74  | 73  | 83  | 98  | 117 | 96  | 90  | 94  | 115 | 80  |
| 58  | 58  | 68  | 97  | 139 | 104 | 87  | 80  | 68  | 51  |
| 118 | 100 | 126 | 235 | 282 | 248 | 354 | 333 | 330 | 169 |
| 62  | 73  | 69  | 49  | 59  | 56  | 36  | 36  | 36  | 37  |
| 61  | 67  | 49  | 19  | 29  | 24  | 26  | 23  | 24  | 24  |
| 110 | 115 | 132 | 73  | 92  | 68  | 95  | 99  | 121 | 98  |
| 30  | 48  | 45  | 30  | 58  | 40  | 58  | 48  | 53  | 54  |
| 18  | 35  | 34  | 29  | 51  | 37  | 32  | 36  | 34  | 24  |
| 52  | 51  | 60  | 65  | 82  | 67  | 69  | 56  | 60  | 49  |
| 31  | 38  | 45  | 57  | 48  | 60  | 51  | 35  | 41  | 44  |
| 42  | 36  | 34  | 27  | 35  | 32  | 43  | 42  | 49  | 43  |
| 37  | 27  | 32  | 32  | 40  | 43  | 41  | 30  | 49  | 35  |
| 37  | 35  | 34  | 61  | 79  | 63  | 73  | 47  | 72  | 44  |
| 35  | 37  | 38  | 16  | 26  | 11  | 15  | 21  | 32  | 34  |
| 59  | 45  | 68  | 87  | 89  | 96  | 82  | 70  | 81  | 54  |
| 20  | 24  | 28  | 12  | 20  | 27  | 22  | 17  | 19  | 15  |
| 69  | 65  | 50  | 118 | 131 | 140 | 90  | 91  | 100 | 62  |
| 107 | 136 | 110 | 180 | 208 | 182 | 227 | 206 | 230 | 135 |

|     |     |     |     |     |     |     |     |     |     |
|-----|-----|-----|-----|-----|-----|-----|-----|-----|-----|
| 95  | 105 | 112 | 112 | 171 | 152 | 118 | 124 | 120 | 99  |
| 64  | 60  | 71  | 75  | 94  | 83  | 78  | 74  | 67  | 73  |
| 60  | 49  | 66  | 118 | 120 | 120 | 112 | 93  | 119 | 70  |
| 42  | 37  | 45  | 54  | 94  | 88  | 56  | 72  | 71  | 37  |
| 42  | 44  | 33  | 53  | 60  | 52  | 57  | 62  | 68  | 42  |
| 77  | 83  | 78  | 132 | 180 | 127 | 141 | 119 | 137 | 90  |
| 62  | 64  | 96  | 100 | 155 | 124 | 111 | 101 | 151 | 67  |
| 58  | 68  | 52  | 76  | 137 | 111 | 94  | 86  | 87  | 53  |
| 165 | 180 | 190 | 253 | 330 | 287 | 269 | 225 | 245 | 194 |
| 61  | 51  | 60  | 101 | 143 | 106 | 113 | 109 | 101 | 57  |
| 43  | 40  | 56  | 123 | 140 | 124 | 119 | 142 | 148 | 75  |
| 57  | 56  | 68  | 143 | 187 | 159 | 179 | 160 | 179 | 85  |
| 29  | 34  | 31  | 22  | 21  | 31  | 44  | 26  | 45  | 32  |
| 46  | 53  | 55  | 44  | 50  | 52  | 71  | 53  | 82  | 52  |
| 28  | 36  | 29  | 34  | 31  | 53  | 41  | 37  | 38  | 43  |
| 58  | 36  | 50  | 33  | 59  | 54  | 46  | 45  | 45  | 33  |
| 26  | 32  | 30  | 34  | 36  | 34  | 36  | 38  | 44  | 30  |
| 42  | 51  | 43  | 70  | 73  | 81  | 101 | 83  | 97  | 56  |
| 63  | 63  | 47  | 84  | 117 | 115 | 196 | 163 | 139 | 111 |
| 46  | 56  | 59  | 41  | 55  | 48  | 40  | 47  | 52  | 27  |
| 19  | 38  | 26  | 22  | 28  | 23  | 21  | 24  | 31  | 30  |
| 32  | 39  | 50  | 45  | 44  | 51  | 24  | 24  | 45  | 25  |
| 24  | 44  | 36  | 26  | 24  | 31  | 30  | 24  | 28  | 24  |
| 49  | 28  | 45  | 35  | 37  | 23  | 25  | 24  | 28  | 33  |
| 47  | 50  | 45  | 76  | 78  | 81  | 63  | 61  | 78  | 53  |
| 21  | 29  | 23  | 32  | 49  | 43  | 26  | 29  | 32  | 24  |
| 40  | 51  | 32  | 44  | 45  | 39  | 47  | 40  | 41  | 42  |
| 53  | 44  | 57  | 59  | 80  | 51  | 59  | 42  | 54  | 49  |
| 47  | 51  | 54  | 108 | 147 | 126 | 124 | 99  | 116 | 59  |
| 24  | 32  | 35  | 13  | 18  | 17  | 20  | 14  | 21  | 25  |
| 41  | 47  | 38  | 34  | 37  | 40  | 47  | 41  | 35  | 26  |
| 49  | 39  | 50  | 660 | 876 | 676 | 762 | 621 | 740 | 340 |
| 19  | 25  | 30  | 54  | 58  | 49  | 46  | 33  | 58  | 31  |
| 60  | 52  | 55  | 57  | 53  | 64  | 70  | 79  | 67  | 42  |
| 50  | 53  | 58  | 132 | 163 | 137 | 95  | 70  | 135 | 61  |
| 32  | 29  | 39  | 65  | 88  | 84  | 62  | 64  | 51  | 38  |
| 76  | 60  | 78  | 94  | 118 | 119 | 77  | 82  | 81  | 59  |
| 42  | 32  | 40  | 168 | 185 | 175 | 131 | 113 | 106 | 58  |
| 62  | 60  | 71  | 233 | 305 | 237 | 203 | 233 | 248 | 100 |
| 18  | 16  | 18  | 85  | 104 | 70  | 48  | 37  | 31  | 14  |
| 19  | 32  | 26  | 110 | 130 | 91  | 69  | 58  | 63  | 43  |

|     |     |     |     |     |     |     |     |     |     |
|-----|-----|-----|-----|-----|-----|-----|-----|-----|-----|
| 37  | 37  | 36  | 80  | 101 | 97  | 82  | 54  | 70  | 39  |
| 69  | 44  | 77  | 93  | 98  | 106 | 96  | 89  | 117 | 73  |
| 45  | 38  | 56  | 80  | 104 | 90  | 69  | 58  | 81  | 47  |
| 87  | 78  | 107 | 82  | 96  | 77  | 106 | 116 | 97  | 81  |
| 44  | 35  | 38  | 88  | 108 | 79  | 90  | 69  | 72  | 52  |
| 35  | 35  | 37  | 52  | 59  | 72  | 61  | 56  | 84  | 54  |
| 54  | 45  | 38  | 107 | 113 | 96  | 92  | 80  | 94  | 51  |
| 8   | 18  | 22  | 37  | 61  | 49  | 50  | 39  | 40  | 22  |
| 44  | 38  | 40  | 69  | 77  | 82  | 48  | 43  | 58  | 48  |
| 42  | 38  | 43  | 43  | 66  | 69  | 65  | 69  | 67  | 56  |
| 65  | 55  | 76  | 273 | 297 | 294 | 377 | 304 | 401 | 191 |
| 69  | 66  | 83  | 336 | 395 | 389 | 365 | 387 | 404 | 140 |
| 33  | 25  | 40  | 37  | 39  | 51  | 43  | 34  | 27  | 24  |
| 21  | 42  | 49  | 15  | 14  | 26  | 27  | 27  | 39  | 32  |
| 29  | 29  | 41  | 21  | 18  | 17  | 21  | 12  | 19  | 23  |
| 22  | 25  | 23  | 19  | 26  | 16  | 13  | 14  | 19  | 19  |
| 16  | 11  | 15  | 13  | 19  | 10  | 17  | 12  | 7   | 14  |
| 36  | 33  | 26  | 48  | 60  | 73  | 37  | 22  | 39  | 49  |
| 17  | 26  | 22  | 18  | 9   | 23  | 14  | 18  | 22  | 10  |
| 7   | 9   | 10  | 17  | 26  | 20  | 12  | 6   | 10  | 15  |
| 30  | 36  | 40  | 93  | 114 | 90  | 87  | 83  | 85  | 44  |
| 45  | 40  | 42  | 102 | 138 | 107 | 98  | 93  | 106 | 45  |
| 12  | 7   | 9   | 44  | 51  | 47  | 22  | 22  | 16  | 11  |
| 21  | 22  | 13  | 49  | 58  | 54  | 27  | 16  | 30  | 22  |
| 119 | 111 | 104 | 290 | 418 | 337 | 186 | 157 | 173 | 101 |
| 69  | 41  | 80  | 217 | 282 | 255 | 174 | 156 | 179 | 85  |
| 77  | 62  | 98  | 180 | 243 | 193 | 119 | 107 | 115 | 72  |
| 41  | 42  | 44  | 74  | 91  | 76  | 61  | 55  | 52  | 44  |
| 24  | 24  | 25  | 47  | 79  | 50  | 59  | 31  | 39  | 29  |
| 44  | 57  | 51  | 87  | 121 | 118 | 100 | 64  | 76  | 52  |
| 71  | 74  | 58  | 118 | 166 | 152 | 169 | 127 | 163 | 75  |
| 42  | 44  | 39  | 456 | 565 | 514 | 548 | 439 | 463 | 192 |
| 45  | 52  | 60  | 137 | 180 | 186 | 248 | 211 | 232 | 128 |
| 37  | 33  | 49  | 78  | 88  | 100 | 108 | 104 | 121 | 58  |
| 50  | 36  | 48  | 140 | 144 | 147 | 200 | 173 | 186 | 107 |
| 33  | 29  | 30  | 64  | 88  | 59  | 84  | 54  | 73  | 42  |
| 49  | 38  | 54  | 164 | 179 | 163 | 117 | 104 | 127 | 81  |
| 46  | 44  | 42  | 45  | 72  | 61  | 66  | 53  | 62  | 51  |
| 27  | 20  | 21  | 54  | 54  | 46  | 39  | 44  | 43  | 34  |
| 62  | 54  | 62  | 77  | 84  | 82  | 68  | 57  | 86  | 53  |
| 31  | 29  | 32  | 22  | 40  | 26  | 32  | 26  | 30  | 24  |



|     |     |     |     |     |     |     |     |     |     |
|-----|-----|-----|-----|-----|-----|-----|-----|-----|-----|
| 68  | 55  | 62  | 97  | 116 | 98  | 90  | 88  | 84  | 68  |
| 56  | 66  | 65  | 70  | 74  | 74  | 49  | 45  | 46  | 47  |
| 9   | 12  | 13  | 10  | 18  | 14  | 19  | 16  | 15  | 5   |
| 62  | 67  | 68  | 81  | 109 | 92  | 80  | 60  | 90  | 60  |
| 81  | 76  | 95  | 259 | 349 | 311 | 314 | 243 | 282 | 130 |
| 63  | 65  | 50  | 259 | 370 | 286 | 297 | 235 | 236 | 101 |
| 33  | 27  | 32  | 127 | 186 | 165 | 137 | 100 | 131 | 62  |
| 25  | 17  | 18  | 27  | 46  | 13  | 27  | 31  | 35  | 10  |
| 71  | 73  | 84  | 104 | 149 | 114 | 133 | 108 | 138 | 77  |
| 52  | 46  | 47  | 148 | 180 | 156 | 136 | 106 | 160 | 55  |
| 76  | 68  | 83  | 95  | 138 | 114 | 131 | 82  | 140 | 67  |
| 79  | 68  | 88  | 118 | 148 | 122 | 196 | 213 | 199 | 117 |
| 29  | 46  | 38  | 64  | 64  | 58  | 75  | 64  | 71  | 51  |
| 35  | 26  | 36  | 69  | 95  | 74  | 52  | 48  | 61  | 49  |
| 60  | 56  | 61  | 52  | 82  | 69  | 82  | 57  | 70  | 44  |
| 37  | 48  | 39  | 11  | 18  | 12  | 18  | 25  | 27  | 29  |
| 57  | 62  | 73  | 60  | 97  | 69  | 79  | 84  | 85  | 48  |
| 59  | 74  | 74  | 164 | 265 | 226 | 204 | 167 | 185 | 87  |
| 51  | 44  | 63  | 141 | 163 | 163 | 98  | 98  | 101 | 58  |
| 70  | 95  | 92  | 540 | 764 | 614 | 506 | 458 | 535 | 234 |
| 101 | 111 | 111 | 224 | 328 | 258 | 200 | 147 | 204 | 89  |
| 44  | 48  | 58  | 240 | 400 | 333 | 236 | 240 | 258 | 125 |
| 110 | 112 | 106 | 156 | 243 | 233 | 178 | 144 | 170 | 90  |
| 22  | 20  | 25  | 86  | 118 | 115 | 72  | 55  | 84  | 41  |
| 47  | 63  | 54  | 223 | 333 | 237 | 212 | 188 | 209 | 95  |
| 64  | 40  | 45  | 237 | 314 | 285 | 162 | 164 | 147 | 84  |
| 40  | 41  | 49  | 217 | 301 | 242 | 176 | 157 | 158 | 92  |
| 41  | 45  | 46  | 247 | 376 | 327 | 304 | 258 | 253 | 117 |
| 16  | 23  | 35  | 50  | 37  | 17  | 45  | 33  | 29  | 16  |
| 38  | 49  | 43  | 54  | 60  | 66  | 48  | 45  | 45  | 42  |
| 31  | 35  | 28  | 33  | 42  | 48  | 41  | 30  | 38  | 31  |
| 31  | 34  | 45  | 36  | 51  | 54  | 45  | 37  | 53  | 24  |
| 21  | 21  | 33  | 62  | 73  | 62  | 43  | 33  | 45  | 25  |
| 24  | 22  | 29  | 58  | 75  | 53  | 54  | 50  | 43  | 28  |
| 98  | 106 | 102 | 75  | 108 | 84  | 76  | 77  | 83  | 80  |
| 37  | 43  | 45  | 49  | 70  | 61  | 44  | 36  | 52  | 22  |
| 30  | 31  | 37  | 23  | 25  | 23  | 32  | 44  | 47  | 23  |
| 106 | 112 | 97  | 55  | 57  | 59  | 60  | 51  | 59  | 42  |
| 87  | 95  | 108 | 207 | 236 | 228 | 251 | 230 | 242 | 93  |
| 93  | 86  | 75  | 177 | 211 | 222 | 245 | 221 | 261 | 121 |
| 78  | 81  | 81  | 131 | 178 | 180 | 154 | 137 | 139 | 98  |

|     |     |     |     |     |     |     |     |     |     |
|-----|-----|-----|-----|-----|-----|-----|-----|-----|-----|
| 105 | 117 | 116 | 123 | 160 | 134 | 135 | 123 | 159 | 90  |
| 10  | 13  | 11  | 11  | 20  | 14  | 14  | 13  | 11  | 13  |
| 40  | 19  | 35  | 27  | 38  | 37  | 32  | 21  | 29  | 22  |
| 6   | 14  | 10  | 15  | 16  | 16  | 14  | 13  | 9   | 9   |
| 28  | 26  | 33  | 45  | 42  | 35  | 30  | 25  | 28  | 28  |
| 3   | 4   | 4   | 2   | 2   | 1   | 1   | 2   | 2   | 5   |
| 36  | 35  | 47  | 35  | 40  | 46  | 48  | 48  | 50  | 38  |
| 31  | 34  | 26  | 34  | 47  | 37  | 30  | 38  | 39  | 37  |
| 63  | 45  | 55  | 128 | 151 | 129 | 91  | 85  | 80  | 65  |
| 15  | 14  | 16  | 10  | 9   | 14  | 11  | 7   | 5   | 7   |
| 32  | 34  | 31  | 51  | 54  | 39  | 32  | 33  | 46  | 38  |
| 65  | 72  | 63  | 181 | 264 | 218 | 333 | 302 | 284 | 137 |
| 30  | 45  | 41  | 140 | 222 | 204 | 114 | 135 | 140 | 62  |
| 20  | 28  | 35  | 38  | 36  | 31  | 39  | 31  | 39  | 34  |
| 22  | 48  | 57  | 88  | 108 | 87  | 122 | 97  | 94  | 61  |
| 33  | 38  | 32  | 36  | 28  | 41  | 37  | 44  | 42  | 32  |
| 63  | 82  | 75  | 69  | 97  | 97  | 90  | 69  | 97  | 54  |
| 7   | 7   | 10  | 16  | 20  | 15  | 10  | 4   | 10  | 12  |
| 7   | 8   | 8   | 14  | 12  | 8   | 5   | 6   | 2   | 4   |
| 18  | 22  | 24  | 56  | 57  | 49  | 36  | 26  | 49  | 26  |
| 12  | 16  | 11  | 30  | 24  | 17  | 12  | 13  | 12  | 14  |
| 7   | 4   | 7   | 11  | 13  | 9   | 8   | 5   | 8   | 4   |
| 42  | 51  | 51  | 61  | 73  | 64  | 66  | 53  | 71  | 46  |
| 76  | 95  | 77  | 87  | 98  | 116 | 95  | 84  | 88  | 76  |
| 56  | 37  | 47  | 37  | 58  | 54  | 40  | 46  | 46  | 43  |
| 85  | 74  | 85  | 69  | 101 | 100 | 78  | 78  | 68  | 71  |
| 54  | 70  | 67  | 85  | 136 | 102 | 105 | 93  | 105 | 83  |
| 51  | 58  | 71  | 44  | 56  | 41  | 43  | 36  | 44  | 62  |
| 57  | 67  | 58  | 75  | 98  | 98  | 70  | 54  | 63  | 60  |
| 36  | 34  | 42  | 34  | 43  | 33  | 33  | 27  | 27  | 28  |
| 9   | 9   | 11  | 8   | 27  | 16  | 13  | 16  | 14  | 9   |
| 22  | 18  | 23  | 28  | 30  | 30  | 24  | 25  | 21  | 36  |
| 39  | 33  | 44  | 32  | 36  | 28  | 28  | 21  | 21  | 31  |
| 37  | 22  | 29  | 24  | 29  | 28  | 21  | 18  | 20  | 24  |
| 10  | 17  | 21  | 7   | 9   | 8   | 9   | 14  | 15  | 13  |
| 37  | 24  | 37  | 49  | 77  | 49  | 45  | 43  | 31  | 29  |
| 14  | 20  | 19  | 9   | 13  | 9   | 7   | 7   | 5   | 7   |
| 32  | 44  | 43  | 34  | 37  | 41  | 25  | 31  | 34  | 37  |
| 19  | 16  | 26  | 14  | 10  | 9   | 5   | 11  | 13  | 12  |
| 37  | 37  | 39  | 64  | 71  | 69  | 37  | 41  | 39  | 35  |
| 50  | 45  | 65  | 31  | 35  | 30  | 31  | 43  | 33  | 35  |

|    |    |    |     |     |     |     |     |     |     |
|----|----|----|-----|-----|-----|-----|-----|-----|-----|
| 20 | 16 | 24 | 7   | 16  | 17  | 2   | 9   | 8   | 13  |
| 24 | 19 | 27 | 9   | 22  | 13  | 17  | 19  | 19  | 24  |
| 77 | 60 | 84 | 44  | 49  | 47  | 67  | 56  | 60  | 76  |
| 6  | 13 | 9  | 9   | 6   | 4   | 6   | 4   | 6   | 7   |
| 48 | 44 | 37 | 73  | 63  | 76  | 60  | 71  | 59  | 38  |
| 14 | 11 | 20 | 9   | 9   | 10  | 12  | 15  | 15  | 11  |
| 18 | 13 | 13 | 13  | 16  | 14  | 22  | 15  | 13  | 20  |
| 20 | 28 | 41 | 24  | 24  | 27  | 25  | 31  | 22  | 25  |
| 38 | 40 | 37 | 41  | 51  | 37  | 53  | 40  | 33  | 40  |
| 29 | 21 | 23 | 22  | 27  | 21  | 27  | 20  | 19  | 12  |
| 45 | 54 | 51 | 60  | 61  | 85  | 46  | 49  | 64  | 43  |
| 50 | 53 | 59 | 38  | 59  | 41  | 85  | 58  | 58  | 50  |
| 53 | 51 | 72 | 51  | 68  | 51  | 43  | 42  | 45  | 49  |
| 38 | 32 | 35 | 19  | 30  | 21  | 33  | 28  | 26  | 33  |
| 27 | 20 | 30 | 24  | 36  | 34  | 28  | 17  | 21  | 21  |
| 31 | 29 | 49 | 56  | 71  | 58  | 63  | 55  | 56  | 56  |
| 53 | 51 | 50 | 86  | 87  | 77  | 93  | 85  | 78  | 52  |
| 36 | 29 | 31 | 34  | 33  | 42  | 45  | 30  | 21  | 26  |
| 30 | 28 | 42 | 63  | 85  | 63  | 43  | 43  | 43  | 50  |
| 46 | 51 | 51 | 28  | 34  | 28  | 34  | 29  | 31  | 25  |
| 40 | 38 | 45 | 69  | 78  | 70  | 62  | 61  | 66  | 62  |
| 34 | 40 | 41 | 46  | 57  | 52  | 46  | 42  | 41  | 49  |
| 34 | 31 | 26 | 41  | 32  | 33  | 45  | 44  | 49  | 35  |
| 51 | 55 | 48 | 63  | 88  | 66  | 69  | 73  | 69  | 55  |
| 45 | 43 | 63 | 94  | 106 | 92  | 69  | 65  | 68  | 50  |
| 42 | 54 | 54 | 71  | 79  | 93  | 107 | 91  | 90  | 59  |
| 33 | 19 | 42 | 125 | 163 | 135 | 122 | 106 | 113 | 46  |
| 28 | 43 | 41 | 99  | 104 | 72  | 108 | 105 | 99  | 40  |
| 76 | 78 | 90 | 161 | 227 | 187 | 159 | 149 | 151 | 99  |
| 38 | 36 | 39 | 50  | 57  | 51  | 79  | 84  | 62  | 50  |
| 22 | 21 | 29 | 61  | 76  | 67  | 60  | 60  | 49  | 31  |
| 23 | 20 | 17 | 64  | 80  | 63  | 43  | 42  | 51  | 19  |
| 28 | 25 | 29 | 60  | 78  | 76  | 47  | 48  | 38  | 32  |
| 12 | 11 | 18 | 13  | 18  | 20  | 8   | 9   | 10  | 10  |
| 19 | 21 | 45 | 78  | 117 | 82  | 119 | 113 | 116 | 48  |
| 35 | 42 | 33 | 56  | 82  | 70  | 67  | 62  | 80  | 50  |
| 69 | 81 | 72 | 79  | 104 | 98  | 92  | 78  | 93  | 57  |
| 76 | 82 | 74 | 327 | 454 | 380 | 442 | 386 | 430 | 184 |
| 34 | 35 | 45 | 68  | 97  | 76  | 72  | 55  | 63  | 44  |
| 35 | 30 | 36 | 39  | 49  | 47  | 28  | 29  | 49  | 32  |
| 15 | 9  | 9  | 15  | 16  | 18  | 24  | 20  | 13  | 9   |

|     |     |     |     |     |     |     |     |     |     |
|-----|-----|-----|-----|-----|-----|-----|-----|-----|-----|
| 62  | 49  | 58  | 367 | 455 | 365 | 492 | 393 | 469 | 178 |
| 137 | 162 | 175 | 121 | 146 | 116 | 129 | 129 | 139 | 89  |
| 66  | 70  | 79  | 53  | 102 | 66  | 46  | 44  | 54  | 26  |
| 57  | 84  | 94  | 57  | 69  | 67  | 97  | 106 | 91  | 78  |
| 81  | 79  | 92  | 73  | 93  | 92  | 59  | 76  | 76  | 43  |
| 29  | 34  | 53  | 66  | 77  | 77  | 71  | 58  | 76  | 32  |
| 39  | 30  | 35  | 44  | 54  | 39  | 66  | 40  | 47  | 29  |
| 16  | 23  | 25  | 21  | 46  | 39  | 40  | 35  | 34  | 26  |
| 26  | 28  | 42  | 77  | 84  | 53  | 50  | 46  | 48  | 34  |
| 41  | 19  | 46  | 55  | 58  | 50  | 61  | 42  | 52  | 36  |
| 41  | 22  | 35  | 43  | 54  | 35  | 24  | 24  | 33  | 20  |
| 53  | 28  | 38  | 57  | 68  | 63  | 74  | 69  | 82  | 41  |
| 31  | 25  | 48  | 70  | 76  | 61  | 61  | 49  | 63  | 28  |
| 9   | 9   | 6   | 15  | 20  | 26  | 21  | 13  | 22  | 13  |
| 31  | 26  | 37  | 95  | 101 | 97  | 122 | 103 | 119 | 66  |
| 50  | 36  | 32  | 98  | 124 | 104 | 52  | 62  | 64  | 44  |
| 44  | 28  | 45  | 19  | 43  | 20  | 37  | 30  | 33  | 29  |
| 42  | 48  | 41  | 54  | 62  | 54  | 47  | 33  | 44  | 28  |
| 55  | 40  | 49  | 43  | 52  | 54  | 55  | 38  | 28  | 19  |
| 29  | 35  | 32  | 46  | 40  | 39  | 48  | 32  | 43  | 33  |
| 35  | 36  | 36  | 25  | 43  | 29  | 43  | 39  | 35  | 28  |
| 32  | 26  | 35  | 49  | 66  | 56  | 45  | 28  | 33  | 20  |
| 31  | 15  | 25  | 44  | 64  | 58  | 54  | 27  | 37  | 23  |
| 80  | 86  | 85  | 171 | 234 | 208 | 151 | 106 | 147 | 73  |
| 29  | 27  | 35  | 38  | 44  | 39  | 53  | 47  | 41  | 33  |
| 44  | 34  | 36  | 30  | 54  | 29  | 65  | 65  | 71  | 36  |
| 35  | 29  | 40  | 40  | 43  | 42  | 58  | 75  | 57  | 38  |
| 10  | 18  | 22  | 3   | 8   | 2   | 8   | 6   | 5   | 11  |
| 57  | 47  | 52  | 36  | 37  | 21  | 48  | 49  | 59  | 42  |
| 59  | 50  | 51  | 80  | 80  | 75  | 51  | 56  | 60  | 44  |
| 49  | 59  | 54  | 67  | 95  | 86  | 81  | 82  | 74  | 64  |
| 42  | 40  | 42  | 54  | 72  | 60  | 69  | 56  | 59  | 46  |
| 15  | 10  | 14  | 24  | 36  | 18  | 20  | 11  | 15  | 5   |
| 40  | 45  | 38  | 72  | 99  | 70  | 74  | 71  | 78  | 49  |
| 87  | 78  | 84  | 86  | 89  | 102 | 123 | 105 | 102 | 85  |
| 39  | 49  | 48  | 74  | 95  | 84  | 132 | 111 | 112 | 53  |
| 59  | 53  | 62  | 55  | 66  | 64  | 59  | 53  | 51  | 44  |
| 68  | 78  | 91  | 127 | 179 | 184 | 153 | 132 | 142 | 84  |
| 54  | 54  | 62  | 51  | 47  | 32  | 73  | 46  | 54  | 57  |
| 37  | 33  | 41  | 53  | 53  | 59  | 52  | 56  | 58  | 45  |
| 40  | 35  | 32  | 47  | 55  | 46  | 41  | 49  | 45  | 47  |

|    |    |     |     |     |     |     |     |     |     |
|----|----|-----|-----|-----|-----|-----|-----|-----|-----|
| 90 | 83 | 116 | 89  | 108 | 102 | 108 | 89  | 101 | 94  |
| 45 | 60 | 44  | 50  | 69  | 60  | 53  | 59  | 49  | 43  |
| 33 | 34 | 50  | 42  | 48  | 49  | 56  | 54  | 40  | 52  |
| 45 | 50 | 63  | 21  | 39  | 29  | 51  | 43  | 57  | 44  |
| 52 | 38 | 48  | 35  | 45  | 49  | 59  | 53  | 73  | 46  |
| 12 | 6  | 7   | 28  | 42  | 32  | 11  | 10  | 22  | 9   |
| 18 | 15 | 25  | 31  | 50  | 33  | 20  | 18  | 20  | 6   |
| 6  | 11 | 7   | 5   | 7   | 5   | 5   | 4   | 8   | 8   |
| 14 | 12 | 10  | 68  | 80  | 61  | 40  | 28  | 38  | 23  |
| 5  | 4  | 8   | 31  | 24  | 27  | 15  | 16  | 20  | 5   |
| 28 | 26 | 19  | 25  | 21  | 18  | 19  | 14  | 14  | 28  |
| 61 | 59 | 66  | 153 | 167 | 141 | 173 | 170 | 175 | 100 |
| 32 | 17 | 25  | 34  | 45  | 41  | 39  | 44  | 43  | 30  |
| 44 | 43 | 69  | 114 | 137 | 143 | 109 | 111 | 97  | 79  |
| 34 | 41 | 32  | 78  | 84  | 66  | 65  | 62  | 48  | 25  |
| 24 | 17 | 26  | 31  | 42  | 25  | 29  | 22  | 26  | 26  |
| 18 | 25 | 40  | 41  | 73  | 59  | 66  | 73  | 78  | 40  |
| 29 | 24 | 31  | 114 | 149 | 123 | 126 | 95  | 126 | 56  |
| 39 | 41 | 38  | 214 | 283 | 235 | 199 | 144 | 189 | 85  |
| 42 | 30 | 35  | 81  | 89  | 76  | 73  | 54  | 72  | 36  |
| 38 | 28 | 35  | 83  | 83  | 105 | 74  | 62  | 73  | 54  |
| 50 | 44 | 52  | 48  | 61  | 59  | 60  | 65  | 60  | 46  |
| 30 | 41 | 30  | 43  | 80  | 66  | 71  | 62  | 65  | 42  |
| 8  | 8  | 17  | 5   | 12  | 11  | 11  | 6   | 7   | 7   |
| 33 | 24 | 42  | 15  | 17  | 23  | 28  | 14  | 30  | 33  |
| 45 | 53 | 58  | 48  | 79  | 67  | 76  | 78  | 65  | 50  |
| 55 | 78 | 75  | 53  | 64  | 58  | 48  | 51  | 50  | 59  |
| 65 | 69 | 65  | 46  | 68  | 62  | 71  | 64  | 74  | 55  |
| 29 | 32 | 41  | 49  | 69  | 58  | 50  | 60  | 38  | 29  |
| 32 | 28 | 28  | 48  | 46  | 48  | 54  | 29  | 34  | 43  |
| 26 | 21 | 18  | 22  | 29  | 24  | 24  | 18  | 18  | 20  |
| 68 | 65 | 68  | 71  | 82  | 76  | 95  | 64  | 84  | 58  |
| 69 | 73 | 87  | 136 | 153 | 142 | 125 | 131 | 131 | 93  |
| 39 | 26 | 36  | 17  | 36  | 31  | 33  | 20  | 25  | 31  |
| 17 | 22 | 24  | 20  | 30  | 19  | 27  | 16  | 18  | 20  |
| 32 | 37 | 39  | 26  | 48  | 31  | 30  | 35  | 33  | 25  |
| 46 | 52 | 48  | 73  | 106 | 76  | 103 | 111 | 91  | 53  |
| 52 | 53 | 54  | 66  | 120 | 86  | 63  | 63  | 53  | 46  |
| 47 | 46 | 38  | 84  | 93  | 98  | 59  | 64  | 75  | 40  |
| 28 | 34 | 36  | 130 | 163 | 164 | 103 | 78  | 94  | 60  |
| 31 | 29 | 32  | 42  | 51  | 38  | 21  | 29  | 30  | 31  |

|    |    |     |     |     |     |     |     |     |     |
|----|----|-----|-----|-----|-----|-----|-----|-----|-----|
| 53 | 46 | 50  | 44  | 52  | 45  | 37  | 28  | 54  | 36  |
| 80 | 69 | 101 | 85  | 112 | 114 | 178 | 150 | 159 | 121 |
| 32 | 25 | 28  | 38  | 46  | 38  | 52  | 41  | 45  | 38  |
| 46 | 37 | 44  | 40  | 64  | 57  | 53  | 41  | 45  | 40  |
| 32 | 40 | 42  | 39  | 48  | 45  | 42  | 27  | 33  | 35  |
| 46 | 38 | 63  | 41  | 75  | 50  | 65  | 57  | 82  | 43  |
| 31 | 26 | 21  | 11  | 19  | 15  | 22  | 20  | 34  | 20  |
| 45 | 40 | 47  | 71  | 73  | 93  | 108 | 82  | 76  | 61  |
| 39 | 49 | 42  | 43  | 55  | 42  | 51  | 48  | 43  | 39  |
| 10 | 3  | 10  | 21  | 22  | 12  | 11  | 10  | 12  | 8   |
| 59 | 57 | 57  | 57  | 82  | 74  | 59  | 52  | 59  | 51  |
| 32 | 37 | 32  | 79  | 101 | 97  | 88  | 68  | 81  | 50  |
| 32 | 30 | 38  | 16  | 12  | 8   | 20  | 21  | 17  | 33  |
| 25 | 31 | 38  | 27  | 31  | 15  | 35  | 33  | 29  | 26  |
| 59 | 56 | 64  | 45  | 56  | 38  | 45  | 45  | 57  | 45  |
| 68 | 52 | 71  | 42  | 84  | 65  | 83  | 64  | 76  | 55  |
| 37 | 40 | 40  | 55  | 72  | 74  | 67  | 66  | 71  | 48  |
| 34 | 35 | 36  | 13  | 20  | 12  | 16  | 31  | 16  | 27  |
| 45 | 43 | 53  | 60  | 55  | 54  | 55  | 54  | 53  | 54  |
| 29 | 25 | 30  | 43  | 62  | 35  | 65  | 46  | 50  | 28  |
| 26 | 26 | 36  | 39  | 32  | 32  | 27  | 41  | 39  | 35  |
| 19 | 18 | 34  | 18  | 30  | 29  | 24  | 20  | 25  | 25  |
| 64 | 51 | 63  | 111 | 141 | 121 | 124 | 85  | 113 | 54  |
| 10 | 3  | 9   | 14  | 22  | 13  | 20  | 12  | 10  | 15  |
| 9  | 12 | 12  | 10  | 29  | 21  | 7   | 9   | 9   | 7   |
| 16 | 14 | 19  | 33  | 30  | 22  | 14  | 20  | 13  | 21  |
| 15 | 13 | 8   | 36  | 51  | 32  | 31  | 34  | 21  | 11  |
| 14 | 6  | 17  | 16  | 35  | 22  | 19  | 22  | 21  | 18  |
| 43 | 44 | 32  | 35  | 32  | 35  | 36  | 25  | 31  | 23  |
| 51 | 44 | 40  | 91  | 113 | 91  | 77  | 72  | 87  | 51  |
| 52 | 47 | 32  | 41  | 44  | 39  | 43  | 36  | 44  | 33  |
| 16 | 25 | 28  | 11  | 26  | 21  | 18  | 6   | 15  | 25  |
| 47 | 31 | 37  | 47  | 49  | 43  | 36  | 36  | 43  | 24  |
| 20 | 20 | 22  | 19  | 24  | 28  | 33  | 26  | 23  | 19  |
| 36 | 37 | 32  | 52  | 57  | 63  | 52  | 55  | 46  | 31  |
| 26 | 24 | 30  | 55  | 52  | 60  | 61  | 46  | 58  | 30  |
| 44 | 50 | 57  | 82  | 97  | 76  | 149 | 119 | 127 | 56  |
| 26 | 32 | 33  | 33  | 37  | 37  | 34  | 30  | 32  | 25  |
| 24 | 36 | 36  | 39  | 51  | 35  | 27  | 20  | 21  | 30  |
| 38 | 51 | 40  | 40  | 59  | 50  | 32  | 44  | 53  | 33  |
| 51 | 37 | 37  | 36  | 69  | 45  | 46  | 49  | 50  | 47  |

|     |     |     |     |     |     |     |     |     |     |
|-----|-----|-----|-----|-----|-----|-----|-----|-----|-----|
| 36  | 24  | 45  | 30  | 48  | 34  | 23  | 13  | 23  | 38  |
| 80  | 74  | 88  | 55  | 94  | 83  | 88  | 90  | 95  | 61  |
| 47  | 47  | 64  | 45  | 65  | 69  | 44  | 39  | 54  | 34  |
| 67  | 75  | 77  | 57  | 68  | 57  | 76  | 73  | 90  | 54  |
| 53  | 60  | 52  | 59  | 69  | 72  | 60  | 62  | 63  | 53  |
| 25  | 35  | 32  | 32  | 63  | 42  | 40  | 41  | 40  | 50  |
| 40  | 40  | 46  | 46  | 45  | 46  | 34  | 49  | 60  | 32  |
| 46  | 38  | 40  | 70  | 85  | 62  | 126 | 110 | 135 | 59  |
| 36  | 50  | 45  | 34  | 38  | 38  | 52  | 38  | 49  | 50  |
| 50  | 52  | 43  | 24  | 29  | 16  | 29  | 31  | 27  | 42  |
| 27  | 28  | 33  | 10  | 14  | 10  | 10  | 8   | 15  | 28  |
| 27  | 45  | 46  | 20  | 23  | 16  | 30  | 31  | 27  | 31  |
| 6   | 16  | 16  | 7   | 4   | 8   | 5   | 6   | 7   | 6   |
| 22  | 26  | 21  | 26  | 43  | 33  | 29  | 25  | 21  | 25  |
| 18  | 22  | 29  | 8   | 19  | 11  | 16  | 18  | 14  | 14  |
| 10  | 12  | 11  | 2   | 17  | 3   | 4   | 6   | 11  | 8   |
| 40  | 29  | 41  | 23  | 23  | 22  | 17  | 20  | 26  | 36  |
| 39  | 28  | 32  | 27  | 44  | 40  | 44  | 32  | 24  | 25  |
| 79  | 52  | 66  | 86  | 118 | 70  | 86  | 62  | 85  | 57  |
| 21  | 17  | 13  | 13  | 21  | 13  | 19  | 18  | 20  | 13  |
| 41  | 50  | 47  | 43  | 58  | 73  | 44  | 40  | 55  | 43  |
| 71  | 73  | 71  | 77  | 108 | 96  | 98  | 99  | 118 | 75  |
| 7   | 11  | 11  | 3   | 6   | 8   | 5   | 10  | 11  | 6   |
| 58  | 71  | 64  | 72  | 78  | 66  | 56  | 51  | 68  | 50  |
| 39  | 25  | 35  | 39  | 58  | 64  | 34  | 34  | 53  | 38  |
| 60  | 74  | 61  | 141 | 170 | 140 | 90  | 71  | 103 | 62  |
| 42  | 42  | 46  | 30  | 53  | 40  | 51  | 37  | 33  | 33  |
| 38  | 52  | 40  | 92  | 92  | 85  | 67  | 74  | 62  | 42  |
| 79  | 84  | 76  | 66  | 85  | 89  | 64  | 62  | 66  | 75  |
| 115 | 104 | 116 | 67  | 113 | 84  | 83  | 72  | 83  | 84  |
| 58  | 76  | 87  | 70  | 79  | 76  | 68  | 47  | 64  | 47  |
| 47  | 31  | 34  | 71  | 79  | 67  | 51  | 57  | 59  | 43  |
| 45  | 31  | 40  | 36  | 39  | 28  | 42  | 39  | 46  | 29  |
| 35  | 44  | 47  | 60  | 79  | 62  | 67  | 48  | 73  | 47  |
| 24  | 13  | 15  | 27  | 34  | 37  | 35  | 34  | 44  | 31  |
| 38  | 38  | 26  | 87  | 117 | 102 | 85  | 79  | 86  | 46  |
| 66  | 73  | 66  | 71  | 92  | 92  | 75  | 74  | 71  | 51  |
| 35  | 42  | 36  | 49  | 59  | 62  | 48  | 43  | 47  | 34  |
| 21  | 28  | 21  | 30  | 40  | 28  | 31  | 33  | 35  | 18  |
| 83  | 101 | 90  | 246 | 352 | 319 | 310 | 276 | 319 | 168 |
| 57  | 48  | 74  | 74  | 95  | 81  | 66  | 79  | 67  | 62  |

|    |     |     |     |     |     |     |     |     |     |
|----|-----|-----|-----|-----|-----|-----|-----|-----|-----|
| 65 | 62  | 60  | 107 | 113 | 100 | 111 | 116 | 104 | 83  |
| 51 | 57  | 38  | 103 | 135 | 103 | 106 | 92  | 98  | 58  |
| 31 | 68  | 46  | 81  | 112 | 104 | 138 | 139 | 132 | 71  |
| 64 | 66  | 64  | 110 | 133 | 145 | 105 | 117 | 125 | 71  |
| 11 | 18  | 14  | 27  | 22  | 21  | 16  | 13  | 16  | 14  |
| 41 | 35  | 51  | 60  | 52  | 40  | 44  | 42  | 39  | 39  |
| 32 | 23  | 28  | 40  | 50  | 45  | 32  | 29  | 31  | 22  |
| 46 | 65  | 53  | 107 | 138 | 123 | 101 | 108 | 99  | 55  |
| 40 | 45  | 41  | 60  | 67  | 75  | 49  | 51  | 41  | 43  |
| 38 | 31  | 34  | 38  | 56  | 36  | 30  | 22  | 36  | 25  |
| 53 | 63  | 53  | 135 | 176 | 146 | 88  | 78  | 88  | 54  |
| 67 | 62  | 59  | 180 | 211 | 200 | 121 | 97  | 147 | 85  |
| 90 | 103 | 98  | 81  | 91  | 86  | 126 | 94  | 99  | 104 |
| 88 | 85  | 92  | 147 | 180 | 192 | 215 | 174 | 179 | 100 |
| 27 | 39  | 37  | 29  | 29  | 27  | 29  | 36  | 36  | 36  |
| 11 | 9   | 9   | 6   | 9   | 10  | 15  | 9   | 11  | 11  |
| 32 | 50  | 48  | 43  | 73  | 56  | 44  | 35  | 38  | 31  |
| 14 | 28  | 32  | 49  | 62  | 54  | 67  | 70  | 60  | 40  |
| 87 | 63  | 67  | 198 | 240 | 173 | 288 | 233 | 267 | 133 |
| 51 | 46  | 54  | 56  | 53  | 42  | 58  | 45  | 50  | 53  |
| 52 | 41  | 50  | 45  | 58  | 46  | 59  | 63  | 61  | 49  |
| 37 | 31  | 44  | 42  | 50  | 28  | 39  | 39  | 40  | 35  |
| 92 | 75  | 84  | 103 | 131 | 141 | 139 | 108 | 124 | 83  |
| 43 | 49  | 44  | 32  | 33  | 39  | 38  | 35  | 39  | 36  |
| 28 | 37  | 40  | 33  | 42  | 36  | 35  | 36  | 29  | 27  |
| 61 | 50  | 44  | 48  | 58  | 49  | 53  | 52  | 58  | 61  |
| 38 | 42  | 41  | 46  | 64  | 57  | 69  | 68  | 61  | 45  |
| 28 | 31  | 41  | 37  | 51  | 40  | 41  | 51  | 46  | 26  |
| 34 | 22  | 31  | 39  | 83  | 55  | 70  | 59  | 62  | 43  |
| 85 | 84  | 121 | 133 | 151 | 149 | 187 | 160 | 191 | 105 |
| 27 | 21  | 29  | 23  | 31  | 34  | 32  | 30  | 41  | 29  |
| 33 | 38  | 34  | 30  | 39  | 53  | 32  | 27  | 33  | 30  |
| 35 | 27  | 39  | 32  | 27  | 53  | 44  | 47  | 39  | 43  |
| 49 | 45  | 61  | 71  | 82  | 76  | 99  | 70  | 97  | 60  |
| 42 | 51  | 37  | 50  | 83  | 41  | 63  | 39  | 49  | 34  |
| 55 | 57  | 61  | 74  | 87  | 60  | 89  | 79  | 99  | 60  |
| 39 | 40  | 50  | 74  | 70  | 92  | 80  | 104 | 86  | 50  |
| 21 | 20  | 28  | 58  | 63  | 60  | 65  | 60  | 71  | 42  |
| 36 | 35  | 26  | 30  | 44  | 34  | 53  | 53  | 31  | 35  |
| 44 | 60  | 42  | 242 | 295 | 280 | 281 | 256 | 321 | 130 |
| 56 | 47  | 45  | 125 | 178 | 127 | 143 | 147 | 153 | 80  |



|    |     |     |     |     |     |     |     |     |     |
|----|-----|-----|-----|-----|-----|-----|-----|-----|-----|
| 41 | 36  | 46  | 50  | 63  | 63  | 56  | 59  | 64  | 36  |
| 59 | 55  | 56  | 89  | 125 | 104 | 130 | 111 | 109 | 64  |
| 19 | 32  | 29  | 81  | 102 | 79  | 64  | 62  | 71  | 34  |
| 98 | 97  | 106 | 185 | 244 | 202 | 204 | 172 | 194 | 135 |
| 77 | 62  | 69  | 112 | 135 | 103 | 159 | 148 | 168 | 83  |
| 45 | 38  | 53  | 43  | 50  | 46  | 48  | 58  | 63  | 32  |
| 94 | 106 | 94  | 168 | 225 | 191 | 186 | 178 | 171 | 97  |
| 41 | 53  | 50  | 78  | 71  | 76  | 72  | 68  | 83  | 39  |
| 35 | 46  | 41  | 51  | 67  | 53  | 54  | 46  | 46  | 30  |
| 29 | 28  | 37  | 23  | 41  | 30  | 32  | 23  | 36  | 29  |
| 62 | 54  | 53  | 66  | 112 | 84  | 78  | 69  | 66  | 68  |
| 42 | 60  | 62  | 60  | 93  | 79  | 82  | 62  | 83  | 63  |
| 99 | 74  | 89  | 105 | 120 | 87  | 125 | 97  | 127 | 76  |
| 73 | 73  | 61  | 81  | 110 | 83  | 97  | 67  | 77  | 53  |
| 57 | 50  | 57  | 47  | 52  | 51  | 55  | 49  | 59  | 50  |
| 54 | 50  | 47  | 55  | 61  | 71  | 64  | 49  | 69  | 41  |
| 35 | 36  | 33  | 56  | 51  | 48  | 88  | 85  | 66  | 51  |
| 34 | 39  | 32  | 41  | 60  | 50  | 41  | 37  | 42  | 39  |
| 28 | 28  | 30  | 89  | 113 | 110 | 92  | 85  | 119 | 56  |
| 18 | 23  | 29  | 22  | 22  | 24  | 23  | 19  | 18  | 19  |
| 28 | 29  | 32  | 84  | 98  | 106 | 62  | 58  | 76  | 44  |
| 19 | 26  | 29  | 53  | 99  | 60  | 47  | 56  | 40  | 40  |
| 32 | 28  | 31  | 174 | 238 | 188 | 164 | 148 | 152 | 83  |
| 16 | 19  | 17  | 53  | 68  | 76  | 57  | 48  | 62  | 40  |
| 15 | 9   | 14  | 34  | 42  | 45  | 36  | 40  | 44  | 23  |
| 43 | 40  | 30  | 79  | 78  | 77  | 53  | 56  | 53  | 33  |
| 36 | 50  | 39  | 86  | 122 | 114 | 63  | 52  | 46  | 50  |
| 24 | 18  | 23  | 46  | 79  | 71  | 49  | 63  | 66  | 28  |
| 20 | 20  | 28  | 46  | 59  | 59  | 57  | 53  | 50  | 36  |
| 70 | 41  | 45  | 72  | 103 | 91  | 77  | 81  | 99  | 47  |
| 31 | 30  | 34  | 40  | 33  | 23  | 36  | 33  | 24  | 24  |
| 35 | 56  | 47  | 22  | 38  | 21  | 30  | 24  | 24  | 23  |
| 44 | 42  | 51  | 29  | 39  | 41  | 36  | 28  | 40  | 32  |
| 34 | 29  | 22  | 19  | 25  | 25  | 33  | 14  | 16  | 28  |
| 15 | 22  | 17  | 17  | 23  | 20  | 22  | 22  | 26  | 19  |
| 38 | 29  | 41  | 39  | 38  | 40  | 29  | 29  | 37  | 34  |
| 45 | 35  | 52  | 23  | 38  | 31  | 26  | 31  | 32  | 35  |
| 36 | 34  | 25  | 57  | 72  | 39  | 26  | 30  | 29  | 27  |
| 60 | 57  | 57  | 46  | 56  | 50  | 24  | 40  | 39  | 26  |
| 49 | 54  | 55  | 44  | 51  | 39  | 44  | 34  | 34  | 43  |
| 18 | 32  | 30  | 29  | 49  | 35  | 17  | 20  | 21  | 14  |

|     |    |     |     |     |     |     |     |     |    |
|-----|----|-----|-----|-----|-----|-----|-----|-----|----|
| 36  | 27 | 38  | 43  | 67  | 54  | 30  | 29  | 32  | 32 |
| 14  | 24 | 23  | 19  | 27  | 21  | 30  | 21  | 35  | 16 |
| 29  | 24 | 38  | 40  | 43  | 35  | 32  | 19  | 29  | 23 |
| 7   | 6  | 9   | 15  | 17  | 15  | 5   | 10  | 12  | 8  |
| 68  | 65 | 74  | 83  | 94  | 86  | 107 | 110 | 110 | 68 |
| 34  | 30 | 25  | 42  | 46  | 44  | 68  | 53  | 67  | 41 |
| 25  | 29 | 40  | 12  | 11  | 17  | 29  | 16  | 39  | 30 |
| 36  | 33 | 35  | 12  | 15  | 10  | 21  | 18  | 18  | 33 |
| 41  | 30 | 26  | 5   | 8   | 16  | 12  | 18  | 17  | 25 |
| 38  | 28 | 37  | 9   | 10  | 11  | 15  | 9   | 14  | 28 |
| 10  | 14 | 15  | 8   | 16  | 9   | 13  | 9   | 14  | 16 |
| 22  | 19 | 17  | 7   | 14  | 16  | 18  | 22  | 16  | 18 |
| 34  | 48 | 46  | 14  | 29  | 16  | 43  | 34  | 26  | 34 |
| 43  | 55 | 57  | 43  | 40  | 47  | 35  | 40  | 48  | 49 |
| 19  | 18 | 25  | 11  | 15  | 19  | 22  | 9   | 22  | 21 |
| 15  | 12 | 15  | 13  | 6   | 20  | 14  | 15  | 11  | 16 |
| 18  | 17 | 19  | 6   | 7   | 5   | 7   | 7   | 4   | 17 |
| 12  | 9  | 7   | 11  | 5   | 4   | 4   | 2   | 7   | 11 |
| 33  | 30 | 32  | 62  | 91  | 75  | 74  | 85  | 62  | 49 |
| 55  | 56 | 70  | 81  | 132 | 123 | 127 | 131 | 105 | 63 |
| 31  | 23 | 30  | 39  | 64  | 46  | 34  | 49  | 32  | 28 |
| 25  | 33 | 17  | 117 | 162 | 150 | 183 | 168 | 171 | 66 |
| 44  | 55 | 61  | 107 | 139 | 118 | 158 | 147 | 128 | 67 |
| 23  | 25 | 24  | 20  | 34  | 30  | 32  | 32  | 41  | 18 |
| 29  | 38 | 47  | 48  | 65  | 56  | 62  | 52  | 56  | 53 |
| 52  | 48 | 51  | 66  | 85  | 55  | 68  | 77  | 77  | 56 |
| 38  | 53 | 46  | 50  | 86  | 91  | 84  | 79  | 84  | 49 |
| 50  | 54 | 56  | 58  | 69  | 68  | 65  | 56  | 70  | 56 |
| 34  | 41 | 36  | 21  | 48  | 34  | 55  | 30  | 56  | 34 |
| 35  | 30 | 33  | 73  | 95  | 66  | 69  | 66  | 53  | 38 |
| 18  | 18 | 15  | 23  | 42  | 35  | 12  | 12  | 19  | 21 |
| 34  | 39 | 33  | 18  | 19  | 16  | 23  | 18  | 17  | 31 |
| 35  | 21 | 41  | 38  | 34  | 33  | 38  | 36  | 40  | 26 |
| 17  | 26 | 28  | 32  | 43  | 30  | 40  | 38  | 44  | 34 |
| 100 | 79 | 100 | 98  | 112 | 115 | 81  | 79  | 96  | 55 |
| 12  | 7  | 10  | 12  | 21  | 17  | 20  | 12  | 13  | 17 |
| 33  | 31 | 23  | 39  | 53  | 49  | 41  | 39  | 47  | 22 |
| 19  | 15 | 22  | 27  | 40  | 29  | 16  | 16  | 23  | 16 |
| 26  | 34 | 19  | 36  | 52  | 42  | 33  | 35  | 37  | 33 |
| 17  | 10 | 7   | 5   | 11  | 8   | 23  | 10  | 10  | 8  |
| 29  | 33 | 44  | 42  | 85  | 56  | 56  | 57  | 48  | 39 |

|     |     |     |     |     |     |     |     |     |     |
|-----|-----|-----|-----|-----|-----|-----|-----|-----|-----|
| 18  | 19  | 23  | 19  | 19  | 6   | 19  | 17  | 17  | 16  |
| 30  | 30  | 26  | 31  | 26  | 31  | 38  | 29  | 26  | 18  |
| 26  | 23  | 13  | 22  | 20  | 22  | 15  | 14  | 8   | 16  |
| 25  | 26  | 36  | 31  | 45  | 39  | 41  | 38  | 46  | 28  |
| 28  | 21  | 27  | 18  | 21  | 15  | 18  | 16  | 19  | 23  |
| 37  | 50  | 37  | 56  | 61  | 67  | 58  | 37  | 46  | 31  |
| 72  | 90  | 85  | 69  | 100 | 98  | 114 | 87  | 85  | 58  |
| 52  | 70  | 74  | 54  | 46  | 53  | 62  | 54  | 57  | 58  |
| 15  | 16  | 13  | 41  | 49  | 40  | 30  | 23  | 27  | 19  |
| 43  | 40  | 37  | 64  | 90  | 78  | 66  | 69  | 66  | 49  |
| 68  | 99  | 95  | 118 | 166 | 139 | 153 | 150 | 182 | 107 |
| 67  | 60  | 69  | 64  | 78  | 88  | 65  | 74  | 67  | 66  |
| 66  | 63  | 83  | 189 | 220 | 175 | 98  | 100 | 97  | 96  |
| 52  | 61  | 69  | 89  | 102 | 98  | 99  | 88  | 102 | 70  |
| 42  | 51  | 50  | 68  | 65  | 75  | 81  | 55  | 73  | 57  |
| 43  | 41  | 53  | 74  | 81  | 69  | 39  | 39  | 34  | 32  |
| 88  | 76  | 97  | 105 | 129 | 112 | 113 | 157 | 155 | 81  |
| 20  | 27  | 30  | 34  | 49  | 47  | 42  | 26  | 35  | 30  |
| 60  | 66  | 89  | 81  | 72  | 84  | 66  | 58  | 85  | 51  |
| 94  | 123 | 131 | 77  | 80  | 67  | 56  | 71  | 78  | 51  |
| 135 | 116 | 144 | 33  | 55  | 60  | 51  | 57  | 55  | 58  |
| 24  | 34  | 29  | 49  | 60  | 62  | 81  | 69  | 77  | 39  |
| 29  | 40  | 30  | 47  | 65  | 67  | 85  | 74  | 83  | 38  |
| 54  | 51  | 65  | 67  | 92  | 75  | 91  | 101 | 87  | 51  |
| 40  | 50  | 54  | 53  | 67  | 43  | 87  | 78  | 101 | 40  |
| 31  | 33  | 39  | 52  | 56  | 42  | 36  | 37  | 52  | 35  |
| 6   | 4   | 3   | 2   | 6   | 8   | 6   | 9   | 11  | 4   |
| 12  | 15  | 16  | 16  | 9   | 12  | 20  | 17  | 9   | 12  |
| 34  | 24  | 37  | 47  | 49  | 40  | 34  | 39  | 36  | 28  |
| 19  | 27  | 30  | 23  | 28  | 21  | 20  | 19  | 16  | 22  |
| 60  | 49  | 60  | 36  | 50  | 32  | 38  | 33  | 42  | 31  |
| 25  | 15  | 19  | 45  | 46  | 35  | 20  | 9   | 22  | 18  |
| 10  | 17  | 13  | 4   | 9   | 4   | 8   | 5   | 10  | 8   |
| 43  | 36  | 30  | 56  | 71  | 61  | 46  | 34  | 41  | 34  |
| 40  | 43  | 39  | 36  | 35  | 49  | 44  | 48  | 56  | 44  |
| 32  | 51  | 35  | 55  | 103 | 77  | 67  | 47  | 53  | 50  |
| 26  | 23  | 32  | 40  | 53  | 52  | 31  | 32  | 48  | 20  |
| 62  | 65  | 82  | 126 | 129 | 137 | 111 | 95  | 120 | 81  |
| 2   | 4   | 2   | 3   | 3   | 7   | 3   | 5   | 4   | 4   |
| 66  | 59  | 71  | 161 | 205 | 178 | 214 | 203 | 219 | 99  |
| 43  | 46  | 40  | 39  | 41  | 53  | 48  | 30  | 42  | 34  |

|    |    |    |     |     |     |     |     |     |     |
|----|----|----|-----|-----|-----|-----|-----|-----|-----|
| 24 | 24 | 27 | 16  | 32  | 25  | 28  | 24  | 24  | 27  |
| 44 | 51 | 52 | 79  | 118 | 91  | 68  | 67  | 63  | 45  |
| 11 | 13 | 20 | 36  | 54  | 47  | 26  | 16  | 23  | 20  |
| 11 | 15 | 12 | 17  | 32  | 17  | 17  | 13  | 19  | 9   |
| 32 | 32 | 43 | 127 | 205 | 163 | 134 | 104 | 130 | 53  |
| 20 | 20 | 28 | 67  | 72  | 67  | 62  | 46  | 54  | 42  |
| 39 | 27 | 24 | 55  | 67  | 59  | 60  | 55  | 55  | 27  |
| 12 | 7  | 8  | 21  | 42  | 42  | 38  | 20  | 33  | 24  |
| 23 | 27 | 20 | 24  | 32  | 28  | 22  | 18  | 25  | 19  |
| 23 | 26 | 27 | 53  | 61  | 79  | 59  | 51  | 47  | 34  |
| 48 | 46 | 54 | 50  | 77  | 61  | 49  | 53  | 62  | 55  |
| 57 | 51 | 56 | 76  | 101 | 82  | 87  | 70  | 92  | 63  |
| 38 | 35 | 54 | 62  | 87  | 69  | 80  | 77  | 64  | 46  |
| 28 | 36 | 33 | 87  | 101 | 82  | 60  | 50  | 61  | 40  |
| 41 | 30 | 33 | 70  | 72  | 76  | 72  | 43  | 67  | 57  |
| 44 | 35 | 36 | 46  | 60  | 59  | 68  | 48  | 43  | 36  |
| 63 | 59 | 55 | 89  | 131 | 105 | 96  | 78  | 86  | 60  |
| 35 | 41 | 41 | 73  | 98  | 62  | 73  | 60  | 72  | 53  |
| 47 | 55 | 58 | 91  | 104 | 104 | 85  | 71  | 64  | 53  |
| 44 | 65 | 66 | 77  | 82  | 94  | 88  | 60  | 97  | 65  |
| 22 | 28 | 32 | 44  | 54  | 43  | 22  | 31  | 21  | 24  |
| 25 | 35 | 29 | 42  | 52  | 40  | 43  | 45  | 40  | 32  |
| 66 | 60 | 45 | 20  | 23  | 27  | 17  | 26  | 26  | 39  |
| 57 | 73 | 72 | 37  | 52  | 43  | 39  | 40  | 45  | 56  |
| 51 | 51 | 58 | 60  | 79  | 74  | 68  | 45  | 49  | 58  |
| 67 | 75 | 89 | 71  | 93  | 92  | 94  | 131 | 143 | 68  |
| 37 | 52 | 47 | 38  | 67  | 47  | 84  | 66  | 70  | 55  |
| 85 | 68 | 71 | 65  | 83  | 75  | 86  | 78  | 108 | 64  |
| 34 | 32 | 38 | 42  | 56  | 35  | 26  | 19  | 24  | 34  |
| 30 | 31 | 32 | 55  | 57  | 53  | 49  | 63  | 63  | 51  |
| 55 | 46 | 59 | 61  | 58  | 51  | 57  | 64  | 39  | 35  |
| 33 | 37 | 36 | 59  | 84  | 72  | 83  | 61  | 79  | 42  |
| 36 | 23 | 40 | 71  | 81  | 65  | 67  | 69  | 61  | 33  |
| 60 | 56 | 58 | 179 | 263 | 194 | 274 | 252 | 236 | 137 |
| 27 | 23 | 32 | 43  | 63  | 46  | 36  | 30  | 36  | 21  |
| 26 | 18 | 21 | 12  | 16  | 12  | 23  | 22  | 19  | 21  |
| 25 | 26 | 26 | 42  | 48  | 50  | 43  | 49  | 50  | 39  |
| 26 | 30 | 31 | 14  | 13  | 10  | 29  | 25  | 27  | 32  |
| 36 | 37 | 55 | 33  | 42  | 51  | 57  | 46  | 45  | 31  |
| 50 | 40 | 56 | 69  | 70  | 65  | 66  | 44  | 64  | 41  |
| 15 | 19 | 20 | 30  | 37  | 23  | 22  | 26  | 31  | 13  |

|    |    |     |     |     |     |     |     |     |     |
|----|----|-----|-----|-----|-----|-----|-----|-----|-----|
| 10 | 9  | 16  | 18  | 16  | 21  | 20  | 10  | 29  | 8   |
| 15 | 19 | 27  | 17  | 19  | 20  | 24  | 18  | 21  | 13  |
| 12 | 12 | 15  | 20  | 20  | 13  | 13  | 21  | 13  | 20  |
| 29 | 38 | 46  | 122 | 155 | 132 | 100 | 108 | 126 | 73  |
| 41 | 45 | 44  | 53  | 56  | 67  | 34  | 42  | 44  | 38  |
| 44 | 44 | 42  | 67  | 83  | 77  | 68  | 60  | 80  | 45  |
| 40 | 45 | 49  | 36  | 45  | 47  | 23  | 21  | 22  | 26  |
| 42 | 37 | 45  | 266 | 324 | 269 | 284 | 242 | 310 | 124 |
| 47 | 45 | 48  | 70  | 104 | 67  | 74  | 75  | 63  | 44  |
| 16 | 15 | 5   | 14  | 16  | 28  | 24  | 21  | 23  | 16  |
| 93 | 88 | 110 | 266 | 356 | 352 | 251 | 238 | 259 | 123 |
| 54 | 75 | 68  | 92  | 126 | 134 | 96  | 95  | 96  | 77  |
| 6  | 8  | 6   | 21  | 15  | 18  | 34  | 24  | 21  | 15  |
| 23 | 24 | 30  | 44  | 62  | 49  | 42  | 39  | 36  | 32  |
| 21 | 16 | 23  | 28  | 27  | 32  | 20  | 26  | 29  | 22  |
| 31 | 42 | 26  | 41  | 37  | 37  | 35  | 29  | 39  | 30  |
| 14 | 20 | 23  | 18  | 33  | 19  | 15  | 9   | 26  | 18  |
| 56 | 64 | 50  | 72  | 84  | 69  | 85  | 67  | 75  | 58  |
| 43 | 38 | 38  | 30  | 48  | 24  | 40  | 36  | 45  | 19  |
| 30 | 37 | 42  | 39  | 42  | 49  | 28  | 37  | 41  | 36  |
| 26 | 27 | 31  | 42  | 52  | 39  | 32  | 37  | 31  | 16  |
| 69 | 42 | 43  | 33  | 47  | 49  | 34  | 33  | 25  | 37  |
| 60 | 76 | 70  | 80  | 84  | 63  | 74  | 69  | 76  | 56  |
| 24 | 30 | 20  | 39  | 64  | 50  | 62  | 48  | 58  | 27  |
| 34 | 28 | 33  | 41  | 61  | 46  | 49  | 29  | 41  | 28  |
| 43 | 59 | 45  | 44  | 47  | 52  | 44  | 46  | 37  | 40  |
| 48 | 51 | 54  | 51  | 81  | 62  | 76  | 63  | 74  | 47  |
| 32 | 36 | 43  | 57  | 75  | 63  | 59  | 59  | 72  | 42  |
| 14 | 22 | 18  | 14  | 19  | 13  | 21  | 15  | 15  | 21  |
| 26 | 42 | 48  | 71  | 43  | 48  | 74  | 74  | 70  | 45  |
| 47 | 50 | 51  | 99  | 162 | 119 | 129 | 133 | 133 | 68  |
| 54 | 47 | 53  | 82  | 106 | 73  | 119 | 102 | 118 | 58  |
| 28 | 32 | 32  | 25  | 30  | 28  | 39  | 22  | 28  | 40  |
| 79 | 93 | 70  | 86  | 116 | 106 | 135 | 136 | 132 | 92  |
| 52 | 59 | 79  | 56  | 80  | 77  | 60  | 56  | 65  | 64  |
| 46 | 52 | 46  | 52  | 72  | 34  | 50  | 52  | 56  | 38  |
| 62 | 60 | 53  | 47  | 80  | 66  | 69  | 60  | 71  | 46  |
| 49 | 51 | 37  | 61  | 55  | 70  | 46  | 48  | 61  | 51  |
| 44 | 51 | 55  | 65  | 78  | 53  | 66  | 57  | 57  | 49  |
| 46 | 56 | 57  | 34  | 53  | 62  | 58  | 50  | 66  | 52  |
| 46 | 48 | 35  | 39  | 46  | 48  | 28  | 36  | 33  | 50  |

|     |    |    |     |     |     |     |     |     |     |
|-----|----|----|-----|-----|-----|-----|-----|-----|-----|
| 47  | 36 | 43 | 50  | 59  | 53  | 46  | 40  | 33  | 36  |
| 63  | 78 | 67 | 77  | 74  | 73  | 104 | 128 | 123 | 62  |
| 58  | 64 | 70 | 84  | 107 | 86  | 111 | 117 | 109 | 79  |
| 53  | 53 | 61 | 52  | 64  | 53  | 51  | 55  | 56  | 40  |
| 59  | 59 | 87 | 79  | 71  | 64  | 80  | 67  | 63  | 55  |
| 51  | 47 | 61 | 58  | 74  | 55  | 49  | 46  | 70  | 36  |
| 63  | 71 | 81 | 61  | 72  | 48  | 63  | 60  | 58  | 47  |
| 46  | 48 | 49 | 56  | 51  | 56  | 55  | 59  | 54  | 43  |
| 90  | 81 | 92 | 88  | 77  | 97  | 81  | 100 | 90  | 62  |
| 60  | 81 | 77 | 72  | 84  | 73  | 63  | 58  | 59  | 56  |
| 31  | 29 | 23 | 61  | 107 | 63  | 55  | 45  | 44  | 31  |
| 36  | 33 | 42 | 59  | 99  | 65  | 46  | 43  | 50  | 38  |
| 58  | 49 | 55 | 114 | 163 | 144 | 156 | 139 | 147 | 77  |
| 20  | 9  | 20 | 51  | 77  | 67  | 52  | 42  | 51  | 23  |
| 76  | 76 | 77 | 164 | 218 | 181 | 201 | 204 | 223 | 96  |
| 31  | 36 | 32 | 63  | 97  | 84  | 67  | 70  | 61  | 38  |
| 32  | 33 | 49 | 82  | 88  | 90  | 112 | 95  | 114 | 39  |
| 24  | 20 | 20 | 58  | 81  | 67  | 77  | 67  | 65  | 41  |
| 29  | 29 | 40 | 32  | 35  | 37  | 29  | 30  | 29  | 26  |
| 45  | 45 | 46 | 6   | 12  | 13  | 22  | 15  | 16  | 33  |
| 58  | 63 | 67 | 111 | 114 | 102 | 102 | 87  | 83  | 65  |
| 7   | 10 | 17 | 5   | 12  | 7   | 5   | 4   | 4   | 7   |
| 40  | 40 | 45 | 31  | 50  | 41  | 36  | 67  | 49  | 35  |
| 58  | 52 | 55 | 53  | 65  | 66  | 95  | 73  | 88  | 62  |
| 26  | 38 | 28 | 50  | 73  | 60  | 40  | 52  | 42  | 44  |
| 34  | 46 | 54 | 41  | 30  | 31  | 29  | 24  | 26  | 37  |
| 39  | 41 | 43 | 99  | 106 | 94  | 110 | 114 | 109 | 58  |
| 66  | 70 | 74 | 110 | 124 | 108 | 81  | 88  | 83  | 62  |
| 27  | 29 | 48 | 12  | 28  | 18  | 19  | 25  | 24  | 24  |
| 52  | 40 | 51 | 127 | 151 | 137 | 96  | 71  | 64  | 51  |
| 54  | 72 | 68 | 92  | 112 | 88  | 72  | 46  | 53  | 47  |
| 43  | 53 | 48 | 127 | 162 | 152 | 96  | 82  | 95  | 54  |
| 51  | 48 | 40 | 45  | 59  | 47  | 43  | 45  | 47  | 45  |
| 14  | 18 | 15 | 8   | 11  | 14  | 17  | 12  | 11  | 14  |
| 24  | 18 | 16 | 27  | 23  | 15  | 20  | 24  | 18  | 18  |
| 18  | 10 | 19 | 18  | 17  | 21  | 12  | 17  | 17  | 13  |
| 23  | 27 | 27 | 45  | 65  | 52  | 38  | 35  | 49  | 39  |
| 36  | 49 | 51 | 52  | 63  | 63  | 75  | 69  | 74  | 41  |
| 42  | 66 | 59 | 74  | 110 | 81  | 92  | 80  | 102 | 59  |
| 70  | 69 | 75 | 211 | 291 | 281 | 276 | 192 | 211 | 116 |
| 100 | 80 | 81 | 99  | 128 | 120 | 96  | 101 | 102 | 90  |

|     |     |     |     |     |     |     |     |     |     |
|-----|-----|-----|-----|-----|-----|-----|-----|-----|-----|
| 41  | 50  | 52  | 93  | 142 | 128 | 116 | 62  | 82  | 51  |
| 25  | 18  | 22  | 29  | 38  | 33  | 18  | 14  | 19  | 25  |
| 30  | 28  | 21  | 28  | 25  | 39  | 21  | 23  | 34  | 23  |
| 31  | 30  | 30  | 29  | 65  | 42  | 55  | 45  | 36  | 34  |
| 34  | 44  | 39  | 57  | 67  | 52  | 43  | 53  | 38  | 28  |
| 19  | 11  | 14  | 9   | 16  | 22  | 21  | 6   | 26  | 17  |
| 26  | 24  | 25  | 31  | 45  | 33  | 27  | 24  | 33  | 19  |
| 34  | 33  | 45  | 55  | 59  | 52  | 47  | 40  | 37  | 28  |
| 25  | 24  | 25  | 36  | 34  | 45  | 32  | 21  | 32  | 30  |
| 31  | 28  | 37  | 59  | 75  | 47  | 61  | 67  | 54  | 45  |
| 25  | 19  | 25  | 29  | 38  | 30  | 28  | 22  | 25  | 17  |
| 20  | 26  | 28  | 17  | 23  | 25  | 30  | 32  | 24  | 18  |
| 90  | 95  | 108 | 97  | 99  | 103 | 119 | 101 | 115 | 120 |
| 128 | 116 | 146 | 164 | 223 | 216 | 288 | 274 | 284 | 166 |
| 74  | 92  | 86  | 104 | 142 | 116 | 152 | 131 | 165 | 90  |
| 109 | 110 | 131 | 63  | 94  | 77  | 135 | 153 | 169 | 91  |
| 37  | 51  | 52  | 106 | 119 | 101 | 130 | 115 | 141 | 62  |
| 121 | 125 | 128 | 113 | 148 | 106 | 163 | 142 | 160 | 137 |
| 131 | 134 | 143 | 135 | 154 | 125 | 188 | 167 | 178 | 154 |
| 56  | 66  | 63  | 59  | 85  | 63  | 132 | 126 | 153 | 80  |
| 78  | 93  | 89  | 132 | 142 | 125 | 140 | 153 | 158 | 85  |
| 29  | 35  | 24  | 49  | 63  | 49  | 56  | 44  | 51  | 35  |
| 7   | 19  | 17  | 47  | 68  | 65  | 31  | 32  | 34  | 19  |
| 45  | 65  | 82  | 101 | 129 | 90  | 82  | 81  | 81  | 60  |
| 65  | 55  | 51  | 128 | 146 | 147 | 96  | 121 | 104 | 68  |
| 59  | 55  | 74  | 86  | 92  | 87  | 84  | 69  | 84  | 61  |
| 23  | 31  | 32  | 85  | 85  | 75  | 69  | 82  | 80  | 21  |
| 66  | 94  | 93  | 165 | 209 | 170 | 207 | 127 | 167 | 113 |
| 70  | 59  | 76  | 97  | 111 | 98  | 139 | 136 | 130 | 93  |
| 55  | 53  | 51  | 95  | 112 | 97  | 58  | 77  | 80  | 53  |
| 38  | 44  | 50  | 75  | 106 | 86  | 104 | 94  | 125 | 62  |
| 39  | 51  | 62  | 61  | 98  | 72  | 68  | 45  | 59  | 51  |
| 107 | 99  | 120 | 167 | 243 | 216 | 192 | 192 | 210 | 129 |
| 15  | 8   | 14  | 7   | 12  | 5   | 11  | 6   | 6   | 10  |
| 50  | 38  | 49  | 56  | 69  | 58  | 46  | 47  | 45  | 36  |
| 8   | 15  | 11  | 9   | 21  | 13  | 27  | 26  | 27  | 14  |
| 6   | 7   | 5   | 8   | 9   | 5   | 7   | 5   | 7   | 7   |
| 29  | 20  | 24  | 31  | 35  | 35  | 28  | 28  | 22  | 23  |
| 31  | 41  | 35  | 34  | 36  | 28  | 21  | 24  | 25  | 26  |
| 24  | 24  | 27  | 39  | 52  | 44  | 39  | 29  | 23  | 35  |
| 27  | 28  | 23  | 13  | 29  | 16  | 24  | 24  | 24  | 19  |

|    |    |    |     |     |     |     |     |     |    |
|----|----|----|-----|-----|-----|-----|-----|-----|----|
| 54 | 55 | 55 | 55  | 62  | 53  | 64  | 68  | 75  | 48 |
| 0  | 1  | 2  | 3   | 3   | 2   | 1   | 3   | 2   | 2  |
| 31 | 31 | 29 | 21  | 33  | 15  | 22  | 27  | 33  | 21 |
| 66 | 55 | 74 | 74  | 102 | 84  | 44  | 77  | 65  | 51 |
| 20 | 15 | 21 | 31  | 34  | 31  | 22  | 15  | 17  | 13 |
| 36 | 38 | 34 | 41  | 57  | 39  | 52  | 54  | 51  | 36 |
| 22 | 25 | 22 | 15  | 27  | 19  | 15  | 15  | 9   | 22 |
| 19 | 15 | 20 | 12  | 19  | 13  | 27  | 13  | 11  | 11 |
| 17 | 17 | 20 | 14  | 9   | 13  | 12  | 14  | 14  | 7  |
| 31 | 32 | 43 | 12  | 22  | 18  | 21  | 25  | 26  | 23 |
| 2  | 3  | 6  | 4   | 6   | 6   | 2   | 5   | 8   | 3  |
| 68 | 63 | 67 | 147 | 196 | 178 | 132 | 130 | 139 | 83 |
| 17 | 21 | 18 | 45  | 52  | 59  | 51  | 58  | 61  | 21 |
| 30 | 29 | 40 | 52  | 74  | 57  | 46  | 47  | 60  | 39 |
| 21 | 34 | 34 | 74  | 86  | 88  | 78  | 66  | 69  | 36 |
| 29 | 26 | 29 | 47  | 52  | 55  | 65  | 43  | 49  | 31 |
| 36 | 34 | 35 | 74  | 95  | 112 | 100 | 86  | 112 | 54 |
| 17 | 15 | 17 | 66  | 72  | 77  | 62  | 67  | 62  | 29 |
| 19 | 23 | 29 | 43  | 79  | 38  | 48  | 58  | 56  | 34 |
| 16 | 28 | 26 | 65  | 74  | 71  | 86  | 91  | 85  | 40 |
| 38 | 47 | 49 | 66  | 82  | 62  | 82  | 72  | 77  | 49 |
| 69 | 74 | 73 | 84  | 114 | 83  | 187 | 192 | 187 | 89 |
| 37 | 25 | 34 | 52  | 58  | 47  | 56  | 53  | 70  | 43 |
| 28 | 36 | 36 | 63  | 86  | 53  | 43  | 38  | 51  | 24 |
| 26 | 34 | 21 | 46  | 65  | 57  | 43  | 49  | 45  | 23 |
| 56 | 42 | 45 | 49  | 42  | 45  | 46  | 33  | 41  | 33 |
| 58 | 51 | 56 | 35  | 54  | 46  | 50  | 45  | 48  | 45 |
| 49 | 47 | 47 | 56  | 78  | 94  | 57  | 62  | 70  | 53 |
| 47 | 62 | 61 | 73  | 76  | 66  | 60  | 64  | 77  | 58 |
| 44 | 45 | 36 | 57  | 60  | 43  | 45  | 40  | 54  | 43 |
| 69 | 64 | 64 | 49  | 46  | 45  | 66  | 70  | 70  | 74 |
| 36 | 44 | 39 | 21  | 30  | 33  | 35  | 31  | 19  | 27 |
| 59 | 46 | 60 | 142 | 170 | 147 | 174 | 146 | 167 | 88 |
| 63 | 62 | 69 | 57  | 69  | 78  | 107 | 89  | 90  | 74 |
| 48 | 59 | 63 | 83  | 127 | 107 | 102 | 91  | 104 | 59 |
| 37 | 31 | 46 | 96  | 95  | 77  | 88  | 78  | 93  | 40 |
| 2  | 5  | 0  | 3   | 2   | 4   | 8   | 3   | 3   | 0  |
| 23 | 19 | 12 | 27  | 29  | 30  | 32  | 30  | 40  | 18 |
| 33 | 35 | 39 | 73  | 96  | 49  | 83  | 52  | 72  | 43 |
| 33 | 34 | 40 | 27  | 42  | 39  | 22  | 26  | 24  | 35 |
| 38 | 43 | 53 | 61  | 93  | 83  | 64  | 51  | 76  | 32 |



|     |     |     |     |     |     |     |     |     |     |
|-----|-----|-----|-----|-----|-----|-----|-----|-----|-----|
| 23  | 13  | 24  | 23  | 29  | 19  | 28  | 27  | 20  | 19  |
| 44  | 37  | 30  | 35  | 40  | 41  | 37  | 43  | 41  | 53  |
| 46  | 36  | 45  | 57  | 85  | 43  | 81  | 75  | 90  | 34  |
| 5   | 4   | 4   | 6   | 4   | 10  | 4   | 5   | 3   | 4   |
| 67  | 53  | 65  | 298 | 367 | 389 | 466 | 402 | 450 | 202 |
| 44  | 37  | 51  | 37  | 50  | 39  | 42  | 48  | 52  | 37  |
| 55  | 54  | 77  | 44  | 53  | 46  | 87  | 70  | 74  | 52  |
| 37  | 34  | 54  | 54  | 66  | 49  | 58  | 38  | 36  | 44  |
| 27  | 30  | 33  | 41  | 56  | 32  | 24  | 21  | 25  | 17  |
| 32  | 34  | 33  | 51  | 43  | 36  | 22  | 28  | 33  | 31  |
| 27  | 29  | 37  | 52  | 80  | 72  | 50  | 49  | 45  | 31  |
| 24  | 26  | 20  | 17  | 20  | 20  | 21  | 13  | 14  | 12  |
| 49  | 68  | 48  | 41  | 49  | 55  | 56  | 50  | 56  | 37  |
| 42  | 54  | 49  | 49  | 80  | 54  | 39  | 42  | 46  | 48  |
| 46  | 37  | 35  | 33  | 50  | 36  | 34  | 31  | 32  | 23  |
| 45  | 67  | 50  | 75  | 93  | 89  | 76  | 72  | 101 | 54  |
| 32  | 23  | 24  | 29  | 42  | 27  | 47  | 40  | 35  | 28  |
| 22  | 22  | 22  | 26  | 23  | 29  | 19  | 17  | 25  | 28  |
| 34  | 46  | 48  | 27  | 27  | 22  | 36  | 25  | 45  | 41  |
| 57  | 70  | 67  | 26  | 28  | 36  | 52  | 33  | 55  | 38  |
| 19  | 14  | 19  | 8   | 11  | 9   | 7   | 9   | 10  | 10  |
| 44  | 42  | 43  | 20  | 21  | 19  | 32  | 24  | 29  | 29  |
| 30  | 27  | 39  | 26  | 24  | 16  | 13  | 22  | 18  | 21  |
| 20  | 24  | 32  | 8   | 16  | 10  | 11  | 11  | 8   | 25  |
| 20  | 9   | 19  | 16  | 13  | 8   | 9   | 16  | 7   | 13  |
| 16  | 19  | 22  | 6   | 8   | 9   | 5   | 3   | 5   | 7   |
| 37  | 39  | 33  | 30  | 35  | 25  | 27  | 27  | 38  | 33  |
| 27  | 30  | 31  | 43  | 30  | 36  | 23  | 35  | 29  | 24  |
| 42  | 49  | 57  | 68  | 78  | 76  | 82  | 91  | 85  | 46  |
| 31  | 41  | 39  | 13  | 25  | 20  | 13  | 16  | 20  | 23  |
| 25  | 26  | 30  | 11  | 14  | 17  | 14  | 7   | 13  | 24  |
| 2   | 4   | 3   | 5   | 7   | 6   | 1   | 3   | 6   | 4   |
| 21  | 27  | 42  | 18  | 22  | 19  | 18  | 11  | 13  | 17  |
| 79  | 53  | 63  | 66  | 90  | 76  | 70  | 65  | 56  | 59  |
| 14  | 13  | 10  | 13  | 16  | 12  | 10  | 6   | 10  | 9   |
| 49  | 37  | 41  | 72  | 88  | 81  | 37  | 43  | 55  | 51  |
| 34  | 28  | 23  | 20  | 43  | 35  | 38  | 19  | 27  | 20  |
| 30  | 26  | 35  | 31  | 35  | 20  | 26  | 18  | 18  | 22  |
| 36  | 39  | 44  | 75  | 73  | 62  | 57  | 58  | 68  | 34  |
| 124 | 120 | 111 | 80  | 104 | 105 | 65  | 74  | 84  | 79  |
| 13  | 18  | 22  | 48  | 51  | 52  | 27  | 22  | 24  | 16  |

|     |    |     |     |     |     |     |     |     |     |
|-----|----|-----|-----|-----|-----|-----|-----|-----|-----|
| 32  | 42 | 57  | 90  | 104 | 81  | 63  | 38  | 58  | 46  |
| 101 | 83 | 105 | 191 | 241 | 218 | 200 | 171 | 186 | 114 |
| 29  | 41 | 35  | 70  | 99  | 81  | 59  | 61  | 69  | 42  |
| 55  | 63 | 67  | 80  | 112 | 76  | 65  | 61  | 80  | 50  |
| 38  | 43 | 50  | 55  | 75  | 49  | 55  | 48  | 63  | 42  |
| 58  | 46 | 42  | 72  | 95  | 72  | 83  | 77  | 79  | 47  |
| 53  | 56 | 66  | 81  | 102 | 81  | 99  | 72  | 108 | 72  |
| 26  | 21 | 29  | 25  | 26  | 24  | 31  | 23  | 27  | 22  |
| 34  | 42 | 31  | 29  | 55  | 60  | 56  | 49  | 49  | 54  |
| 39  | 53 | 47  | 59  | 58  | 66  | 59  | 61  | 92  | 41  |
| 52  | 48 | 57  | 25  | 43  | 41  | 38  | 41  | 38  | 57  |
| 46  | 57 | 45  | 70  | 102 | 86  | 71  | 58  | 69  | 50  |
| 42  | 44 | 44  | 32  | 31  | 44  | 37  | 39  | 35  | 26  |
| 22  | 26 | 20  | 25  | 24  | 25  | 13  | 17  | 16  | 28  |
| 43  | 36 | 46  | 40  | 66  | 56  | 59  | 63  | 51  | 37  |
| 56  | 51 | 58  | 61  | 75  | 82  | 89  | 87  | 88  | 56  |
| 42  | 53 | 52  | 26  | 43  | 32  | 42  | 26  | 29  | 40  |
| 21  | 17 | 16  | 49  | 54  | 45  | 48  | 43  | 48  | 28  |
| 43  | 45 | 48  | 116 | 164 | 153 | 235 | 239 | 265 | 109 |
| 70  | 57 | 72  | 127 | 213 | 170 | 208 | 231 | 237 | 97  |
| 32  | 23 | 38  | 48  | 49  | 51  | 47  | 33  | 52  | 36  |
| 35  | 32 | 28  | 31  | 45  | 58  | 72  | 58  | 54  | 40  |
| 50  | 66 | 67  | 49  | 57  | 63  | 63  | 58  | 68  | 50  |
| 40  | 30 | 45  | 96  | 127 | 111 | 94  | 86  | 88  | 44  |
| 55  | 58 | 63  | 38  | 55  | 39  | 43  | 26  | 32  | 39  |
| 54  | 67 | 69  | 53  | 59  | 62  | 47  | 45  | 40  | 41  |
| 62  | 45 | 82  | 95  | 147 | 129 | 157 | 127 | 167 | 69  |
| 47  | 50 | 42  | 53  | 68  | 89  | 61  | 76  | 86  | 52  |
| 96  | 86 | 95  | 84  | 123 | 84  | 118 | 101 | 133 | 59  |
| 11  | 11 | 26  | 9   | 22  | 9   | 27  | 19  | 17  | 19  |
| 18  | 18 | 25  | 6   | 13  | 13  | 11  | 10  | 17  | 18  |
| 27  | 43 | 35  | 25  | 34  | 24  | 34  | 36  | 37  | 38  |
| 59  | 47 | 68  | 68  | 101 | 61  | 70  | 70  | 69  | 60  |
| 19  | 19 | 19  | 30  | 42  | 40  | 34  | 29  | 35  | 17  |
| 89  | 81 | 97  | 119 | 220 | 165 | 164 | 169 | 161 | 124 |
| 48  | 41 | 56  | 32  | 64  | 38  | 62  | 45  | 52  | 40  |
| 51  | 57 | 59  | 32  | 47  | 37  | 38  | 34  | 37  | 37  |
| 46  | 47 | 51  | 60  | 64  | 59  | 86  | 93  | 90  | 62  |
| 46  | 51 | 48  | 42  | 45  | 42  | 52  | 46  | 48  | 40  |
| 41  | 31 | 37  | 50  | 66  | 46  | 56  | 57  | 61  | 30  |
| 39  | 40 | 30  | 72  | 80  | 55  | 82  | 77  | 83  | 34  |

|     |     |     |     |     |     |     |     |     |     |
|-----|-----|-----|-----|-----|-----|-----|-----|-----|-----|
| 17  | 12  | 25  | 29  | 38  | 37  | 33  | 23  | 22  | 13  |
| 14  | 20  | 18  | 31  | 39  | 37  | 32  | 28  | 32  | 19  |
| 28  | 27  | 40  | 39  | 47  | 39  | 38  | 28  | 37  | 24  |
| 27  | 34  | 31  | 35  | 39  | 33  | 29  | 23  | 19  | 32  |
| 53  | 34  | 40  | 40  | 57  | 43  | 41  | 35  | 43  | 35  |
| 51  | 56  | 55  | 54  | 84  | 74  | 82  | 84  | 76  | 66  |
| 27  | 29  | 26  | 28  | 32  | 28  | 33  | 33  | 33  | 31  |
| 23  | 19  | 41  | 63  | 63  | 58  | 47  | 43  | 51  | 30  |
| 23  | 20  | 31  | 24  | 21  | 19  | 18  | 13  | 17  | 21  |
| 30  | 28  | 30  | 37  | 46  | 44  | 41  | 38  | 38  | 18  |
| 25  | 32  | 32  | 39  | 35  | 44  | 39  | 32  | 27  | 35  |
| 4   | 4   | 11  | 21  | 21  | 19  | 22  | 11  | 22  | 11  |
| 53  | 59  | 72  | 48  | 43  | 48  | 33  | 30  | 39  | 34  |
| 54  | 50  | 51  | 77  | 100 | 79  | 88  | 73  | 74  | 67  |
| 52  | 58  | 55  | 53  | 67  | 52  | 63  | 58  | 49  | 50  |
| 17  | 36  | 24  | 21  | 30  | 20  | 27  | 29  | 21  | 18  |
| 55  | 53  | 60  | 46  | 56  | 62  | 70  | 58  | 55  | 38  |
| 41  | 50  | 54  | 41  | 56  | 49  | 38  | 44  | 33  | 38  |
| 40  | 50  | 49  | 31  | 56  | 43  | 44  | 31  | 30  | 37  |
| 33  | 29  | 39  | 48  | 69  | 57  | 67  | 74  | 67  | 31  |
| 43  | 49  | 47  | 103 | 122 | 108 | 124 | 90  | 109 | 70  |
| 33  | 27  | 42  | 50  | 80  | 48  | 53  | 38  | 43  | 22  |
| 92  | 89  | 119 | 80  | 108 | 82  | 83  | 67  | 102 | 55  |
| 38  | 29  | 38  | 40  | 54  | 33  | 35  | 44  | 30  | 22  |
| 41  | 48  | 47  | 85  | 126 | 94  | 73  | 92  | 96  | 49  |
| 43  | 33  | 31  | 20  | 39  | 48  | 32  | 28  | 42  | 19  |
| 60  | 66  | 60  | 64  | 69  | 42  | 50  | 65  | 67  | 36  |
| 54  | 55  | 50  | 105 | 124 | 101 | 110 | 103 | 115 | 72  |
| 29  | 28  | 29  | 119 | 132 | 137 | 183 | 159 | 192 | 90  |
| 76  | 58  | 68  | 187 | 249 | 214 | 272 | 237 | 239 | 137 |
| 37  | 35  | 47  | 112 | 150 | 121 | 155 | 140 | 149 | 68  |
| 37  | 41  | 48  | 43  | 67  | 47  | 46  | 40  | 56  | 27  |
| 126 | 107 | 114 | 94  | 110 | 83  | 95  | 93  | 90  | 81  |
| 61  | 48  | 51  | 66  | 93  | 85  | 68  | 60  | 68  | 56  |
| 93  | 104 | 122 | 21  | 16  | 25  | 51  | 40  | 36  | 79  |
| 41  | 50  | 42  | 62  | 62  | 62  | 59  | 58  | 69  | 45  |
| 21  | 20  | 19  | 30  | 25  | 36  | 28  | 20  | 36  | 19  |
| 37  | 42  | 39  | 63  | 111 | 75  | 62  | 61  | 69  | 36  |
| 26  | 32  | 31  | 64  | 80  | 57  | 45  | 42  | 54  | 31  |
| 11  | 14  | 13  | 46  | 66  | 47  | 31  | 37  | 40  | 19  |
| 8   | 13  | 15  | 50  | 98  | 76  | 41  | 29  | 55  | 21  |

|     |     |     |     |     |     |     |     |     |     |
|-----|-----|-----|-----|-----|-----|-----|-----|-----|-----|
| 7   | 4   | 6   | 5   | 5   | 1   | 2   | 2   | 1   | 10  |
| 30  | 27  | 21  | 19  | 25  | 22  | 22  | 14  | 21  | 17  |
| 7   | 6   | 8   | 11  | 18  | 11  | 9   | 10  | 10  | 8   |
| 9   | 10  | 10  | 12  | 13  | 9   | 14  | 9   | 8   | 17  |
| 5   | 4   | 6   | 7   | 5   | 9   | 2   | 1   | 4   | 5   |
| 36  | 46  | 50  | 90  | 108 | 100 | 98  | 96  | 105 | 55  |
| 35  | 52  | 46  | 52  | 70  | 71  | 89  | 76  | 66  | 60  |
| 36  | 39  | 41  | 58  | 54  | 49  | 62  | 59  | 56  | 35  |
| 37  | 34  | 34  | 242 | 334 | 276 | 234 | 188 | 204 | 108 |
| 18  | 23  | 21  | 20  | 25  | 22  | 15  | 18  | 19  | 15  |
| 45  | 39  | 41  | 48  | 79  | 66  | 27  | 42  | 43  | 54  |
| 14  | 22  | 24  | 15  | 27  | 12  | 21  | 29  | 20  | 20  |
| 33  | 29  | 27  | 41  | 35  | 28  | 25  | 27  | 34  | 15  |
| 12  | 16  | 20  | 5   | 16  | 13  | 12  | 15  | 8   | 14  |
| 35  | 30  | 40  | 21  | 27  | 21  | 17  | 24  | 34  | 28  |
| 17  | 12  | 16  | 12  | 19  | 22  | 17  | 26  | 20  | 14  |
| 13  | 11  | 11  | 10  | 12  | 2   | 6   | 9   | 14  | 9   |
| 21  | 22  | 23  | 9   | 17  | 9   | 15  | 15  | 10  | 18  |
| 50  | 53  | 46  | 56  | 80  | 65  | 79  | 55  | 63  | 54  |
| 37  | 66  | 45  | 73  | 85  | 96  | 90  | 87  | 68  | 63  |
| 49  | 68  | 82  | 180 | 236 | 194 | 223 | 225 | 240 | 115 |
| 22  | 20  | 24  | 17  | 16  | 20  | 12  | 15  | 10  | 18  |
| 42  | 32  | 54  | 227 | 249 | 236 | 250 | 268 | 279 | 123 |
| 23  | 28  | 25  | 65  | 65  | 73  | 64  | 88  | 70  | 33  |
| 20  | 27  | 21  | 41  | 41  | 37  | 30  | 27  | 26  | 24  |
| 28  | 40  | 40  | 34  | 44  | 32  | 43  | 30  | 24  | 31  |
| 48  | 39  | 45  | 26  | 26  | 17  | 17  | 14  | 26  | 23  |
| 64  | 50  | 67  | 72  | 78  | 67  | 72  | 68  | 76  | 49  |
| 17  | 21  | 18  | 12  | 16  | 13  | 10  | 6   | 6   | 16  |
| 21  | 39  | 34  | 44  | 44  | 50  | 40  | 36  | 40  | 31  |
| 64  | 57  | 61  | 140 | 188 | 164 | 164 | 138 | 166 | 74  |
| 17  | 19  | 12  | 81  | 112 | 118 | 119 | 99  | 118 | 61  |
| 126 | 118 | 124 | 186 | 229 | 204 | 166 | 153 | 187 | 104 |
| 36  | 32  | 20  | 47  | 40  | 35  | 48  | 45  | 45  | 30  |
| 37  | 38  | 44  | 103 | 103 | 112 | 98  | 100 | 94  | 54  |
| 16  | 28  | 22  | 37  | 41  | 35  | 22  | 26  | 34  | 28  |
| 51  | 47  | 51  | 79  | 75  | 76  | 72  | 67  | 69  | 47  |
| 52  | 49  | 31  | 72  | 89  | 89  | 61  | 50  | 47  | 48  |
| 33  | 34  | 34  | 51  | 41  | 48  | 52  | 38  | 42  | 34  |
| 47  | 47  | 38  | 80  | 76  | 86  | 91  | 58  | 64  | 52  |
| 65  | 60  | 65  | 84  | 96  | 76  | 90  | 79  | 103 | 63  |

|    |     |     |     |     |     |     |     |     |     |
|----|-----|-----|-----|-----|-----|-----|-----|-----|-----|
| 74 | 77  | 76  | 132 | 150 | 120 | 175 | 137 | 148 | 80  |
| 26 | 31  | 29  | 18  | 19  | 21  | 23  | 18  | 16  | 26  |
| 42 | 45  | 39  | 209 | 275 | 235 | 213 | 181 | 212 | 73  |
| 29 | 32  | 20  | 16  | 21  | 16  | 23  | 13  | 13  | 35  |
| 47 | 42  | 76  | 69  | 101 | 80  | 71  | 80  | 86  | 63  |
| 38 | 47  | 35  | 73  | 59  | 53  | 69  | 61  | 69  | 28  |
| 26 | 25  | 39  | 41  | 63  | 74  | 68  | 53  | 54  | 41  |
| 31 | 22  | 32  | 36  | 53  | 39  | 37  | 41  | 33  | 34  |
| 40 | 38  | 53  | 72  | 103 | 94  | 98  | 81  | 82  | 58  |
| 23 | 32  | 47  | 88  | 84  | 87  | 80  | 77  | 85  | 44  |
| 53 | 74  | 61  | 78  | 103 | 81  | 92  | 87  | 86  | 65  |
| 18 | 13  | 13  | 50  | 79  | 60  | 27  | 25  | 31  | 14  |
| 36 | 40  | 32  | 71  | 75  | 90  | 51  | 57  | 65  | 44  |
| 51 | 56  | 65  | 129 | 175 | 108 | 127 | 139 | 145 | 73  |
| 26 | 22  | 32  | 45  | 64  | 60  | 21  | 19  | 18  | 31  |
| 34 | 50  | 47  | 35  | 53  | 40  | 41  | 36  | 37  | 31  |
| 19 | 30  | 44  | 43  | 64  | 56  | 48  | 42  | 36  | 34  |
| 35 | 36  | 35  | 38  | 45  | 29  | 29  | 25  | 32  | 32  |
| 27 | 21  | 32  | 24  | 35  | 39  | 33  | 24  | 26  | 27  |
| 47 | 40  | 41  | 97  | 99  | 89  | 75  | 47  | 61  | 56  |
| 25 | 22  | 35  | 16  | 21  | 17  | 27  | 26  | 20  | 30  |
| 14 | 15  | 12  | 15  | 17  | 21  | 9   | 19  | 16  | 11  |
| 46 | 39  | 69  | 87  | 135 | 90  | 71  | 64  | 61  | 62  |
| 16 | 16  | 6   | 20  | 19  | 19  | 18  | 19  | 13  | 22  |
| 31 | 48  | 55  | 104 | 109 | 117 | 97  | 104 | 85  | 53  |
| 43 | 37  | 34  | 58  | 87  | 57  | 45  | 40  | 53  | 41  |
| 28 | 40  | 44  | 45  | 59  | 46  | 54  | 38  | 46  | 42  |
| 30 | 28  | 25  | 30  | 49  | 46  | 30  | 26  | 36  | 31  |
| 23 | 27  | 25  | 31  | 44  | 34  | 35  | 22  | 30  | 18  |
| 31 | 31  | 21  | 29  | 41  | 33  | 28  | 29  | 28  | 29  |
| 19 | 19  | 20  | 10  | 28  | 18  | 20  | 19  | 15  | 25  |
| 42 | 46  | 48  | 32  | 58  | 37  | 39  | 31  | 45  | 28  |
| 29 | 30  | 24  | 40  | 38  | 39  | 48  | 23  | 47  | 26  |
| 30 | 41  | 39  | 32  | 49  | 40  | 40  | 46  | 28  | 32  |
| 19 | 23  | 26  | 8   | 10  | 5   | 16  | 13  | 17  | 18  |
| 59 | 53  | 51  | 131 | 152 | 136 | 122 | 105 | 101 | 66  |
| 80 | 66  | 79  | 159 | 231 | 178 | 123 | 117 | 135 | 87  |
| 79 | 109 | 107 | 131 | 192 | 184 | 124 | 107 | 121 | 48  |
| 39 | 46  | 60  | 67  | 93  | 68  | 58  | 54  | 49  | 49  |
| 68 | 58  | 46  | 75  | 97  | 80  | 97  | 76  | 80  | 57  |
| 76 | 65  | 93  | 227 | 276 | 250 | 196 | 160 | 189 | 120 |

|     |     |     |     |     |     |     |     |     |     |
|-----|-----|-----|-----|-----|-----|-----|-----|-----|-----|
| 35  | 46  | 47  | 73  | 94  | 82  | 64  | 63  | 74  | 47  |
| 72  | 65  | 85  | 103 | 148 | 135 | 92  | 82  | 98  | 73  |
| 48  | 52  | 43  | 101 | 122 | 107 | 118 | 90  | 110 | 69  |
| 71  | 78  | 66  | 206 | 267 | 211 | 170 | 175 | 187 | 117 |
| 48  | 55  | 54  | 97  | 117 | 101 | 106 | 91  | 93  | 54  |
| 34  | 40  | 45  | 72  | 99  | 116 | 78  | 67  | 81  | 42  |
| 34  | 39  | 24  | 47  | 49  | 41  | 41  | 29  | 28  | 37  |
| 6   | 9   | 7   | 8   | 4   | 5   | 7   | 5   | 8   | 4   |
| 35  | 44  | 38  | 58  | 58  | 52  | 44  | 39  | 38  | 32  |
| 11  | 24  | 16  | 42  | 63  | 50  | 50  | 47  | 49  | 32  |
| 25  | 22  | 32  | 40  | 48  | 46  | 34  | 34  | 36  | 23  |
| 58  | 47  | 66  | 66  | 88  | 67  | 77  | 68  | 77  | 49  |
| 39  | 50  | 43  | 49  | 38  | 37  | 48  | 54  | 53  | 41  |
| 81  | 84  | 91  | 126 | 188 | 162 | 120 | 130 | 143 | 100 |
| 54  | 41  | 48  | 95  | 95  | 94  | 83  | 75  | 73  | 47  |
| 18  | 18  | 23  | 45  | 57  | 38  | 30  | 26  | 22  | 20  |
| 10  | 12  | 11  | 31  | 36  | 26  | 12  | 16  | 14  | 15  |
| 28  | 24  | 42  | 75  | 76  | 65  | 56  | 48  | 51  | 27  |
| 35  | 41  | 50  | 120 | 175 | 129 | 126 | 99  | 145 | 68  |
| 16  | 18  | 18  | 32  | 26  | 24  | 23  | 23  | 11  | 17  |
| 56  | 47  | 70  | 68  | 82  | 63  | 86  | 71  | 78  | 55  |
| 19  | 11  | 17  | 20  | 30  | 18  | 13  | 9   | 11  | 8   |
| 20  | 17  | 17  | 51  | 69  | 48  | 33  | 32  | 38  | 18  |
| 25  | 29  | 30  | 41  | 63  | 53  | 32  | 44  | 31  | 38  |
| 31  | 40  | 26  | 30  | 48  | 38  | 29  | 29  | 31  | 17  |
| 31  | 25  | 27  | 24  | 28  | 21  | 17  | 19  | 29  | 23  |
| 13  | 13  | 17  | 5   | 5   | 4   | 8   | 5   | 3   | 5   |
| 33  | 35  | 38  | 43  | 54  | 46  | 51  | 42  | 61  | 37  |
| 36  | 30  | 42  | 44  | 51  | 40  | 49  | 51  | 57  | 38  |
| 89  | 85  | 77  | 163 | 186 | 190 | 211 | 191 | 232 | 113 |
| 54  | 60  | 70  | 105 | 122 | 118 | 153 | 94  | 142 | 76  |
| 28  | 40  | 28  | 60  | 59  | 56  | 53  | 59  | 39  | 33  |
| 30  | 18  | 36  | 42  | 66  | 58  | 56  | 34  | 48  | 29  |
| 27  | 29  | 32  | 37  | 41  | 47  | 29  | 27  | 49  | 28  |
| 80  | 86  | 75  | 114 | 158 | 113 | 133 | 139 | 127 | 99  |
| 69  | 67  | 59  | 58  | 86  | 71  | 80  | 77  | 80  | 45  |
| 62  | 51  | 50  | 70  | 89  | 70  | 80  | 72  | 74  | 48  |
| 175 | 174 | 180 | 90  | 110 | 87  | 68  | 69  | 75  | 66  |
| 156 | 130 | 156 | 52  | 82  | 75  | 75  | 66  | 73  | 54  |
| 110 | 76  | 110 | 29  | 30  | 42  | 29  | 29  | 41  | 38  |
| 105 | 101 | 96  | 32  | 49  | 47  | 52  | 46  | 57  | 55  |

|     |     |     |     |     |     |     |     |     |     |
|-----|-----|-----|-----|-----|-----|-----|-----|-----|-----|
| 110 | 112 | 117 | 66  | 85  | 60  | 63  | 74  | 74  | 53  |
| 98  | 98  | 91  | 62  | 58  | 51  | 55  | 43  | 40  | 39  |
| 167 | 178 | 193 | 38  | 66  | 76  | 68  | 74  | 64  | 56  |
| 79  | 83  | 80  | 68  | 92  | 82  | 102 | 101 | 104 | 86  |
| 66  | 51  | 56  | 35  | 30  | 52  | 47  | 47  | 41  | 54  |
| 13  | 20  | 19  | 15  | 24  | 20  | 34  | 27  | 27  | 37  |
| 89  | 88  | 104 | 50  | 103 | 75  | 75  | 77  | 88  | 49  |
| 99  | 87  | 100 | 119 | 135 | 132 | 161 | 191 | 210 | 103 |
| 60  | 51  | 66  | 40  | 51  | 54  | 67  | 70  | 58  | 67  |
| 137 | 135 | 127 | 192 | 252 | 225 | 245 | 289 | 264 | 154 |
| 43  | 42  | 56  | 55  | 78  | 55  | 61  | 63  | 73  | 47  |
| 59  | 56  | 62  | 85  | 92  | 106 | 92  | 83  | 101 | 60  |
| 133 | 115 | 153 | 126 | 137 | 156 | 198 | 203 | 202 | 152 |
| 74  | 77  | 66  | 62  | 94  | 81  | 99  | 113 | 102 | 78  |
| 71  | 74  | 98  | 162 | 194 | 197 | 139 | 166 | 137 | 85  |
| 59  | 64  | 58  | 48  | 61  | 63  | 84  | 71  | 81  | 64  |
| 23  | 13  | 20  | 17  | 22  | 21  | 14  | 10  | 13  | 12  |
| 15  | 12  | 17  | 7   | 11  | 17  | 5   | 2   | 9   | 10  |
| 23  | 20  | 29  | 92  | 102 | 130 | 57  | 51  | 62  | 30  |
| 44  | 62  | 52  | 93  | 133 | 115 | 56  | 78  | 68  | 62  |
| 30  | 18  | 32  | 171 | 240 | 152 | 106 | 83  | 99  | 43  |
| 33  | 30  | 44  | 101 | 102 | 87  | 40  | 42  | 35  | 43  |
| 33  | 38  | 54  | 97  | 145 | 105 | 41  | 47  | 53  | 45  |
| 32  | 39  | 42  | 31  | 38  | 59  | 34  | 28  | 32  | 38  |
| 20  | 18  | 20  | 64  | 100 | 72  | 60  | 37  | 59  | 30  |
| 4   | 10  | 16  | 9   | 16  | 13  | 10  | 4   | 11  | 7   |
| 63  | 65  | 69  | 63  | 62  | 67  | 75  | 51  | 74  | 63  |
| 54  | 56  | 45  | 134 | 153 | 129 | 162 | 162 | 148 | 89  |
| 48  | 64  | 74  | 35  | 56  | 43  | 51  | 56  | 56  | 66  |
| 36  | 60  | 52  | 103 | 117 | 122 | 103 | 99  | 108 | 60  |
| 17  | 14  | 13  | 10  | 11  | 16  | 15  | 11  | 18  | 16  |
| 16  | 15  | 18  | 37  | 37  | 14  | 17  | 14  | 16  | 12  |
| 67  | 54  | 80  | 77  | 88  | 84  | 107 | 106 | 116 | 75  |
| 48  | 36  | 48  | 44  | 37  | 36  | 41  | 29  | 43  | 51  |
| 31  | 31  | 38  | 48  | 61  | 46  | 37  | 22  | 26  | 22  |
| 41  | 47  | 34  | 28  | 32  | 35  | 43  | 32  | 36  | 35  |
| 14  | 21  | 20  | 28  | 35  | 26  | 34  | 38  | 30  | 15  |
| 18  | 38  | 34  | 62  | 73  | 65  | 52  | 50  | 87  | 38  |
| 32  | 38  | 37  | 58  | 80  | 55  | 49  | 44  | 60  | 31  |
| 52  | 65  | 71  | 31  | 47  | 32  | 43  | 35  | 44  | 54  |
| 85  | 61  | 68  | 80  | 105 | 81  | 113 | 96  | 96  | 62  |

|     |     |     |     |     |     |     |     |     |     |
|-----|-----|-----|-----|-----|-----|-----|-----|-----|-----|
| 52  | 38  | 45  | 61  | 62  | 65  | 59  | 70  | 83  | 51  |
| 3   | 5   | 5   | 7   | 5   | 2   | 7   | 5   | 3   | 1   |
| 78  | 95  | 93  | 113 | 117 | 121 | 121 | 112 | 139 | 100 |
| 40  | 49  | 43  | 83  | 145 | 115 | 105 | 81  | 104 | 56  |
| 21  | 21  | 31  | 5   | 13  | 21  | 19  | 19  | 26  | 21  |
| 29  | 26  | 34  | 21  | 28  | 26  | 18  | 21  | 18  | 22  |
| 28  | 25  | 28  | 45  | 56  | 71  | 57  | 35  | 45  | 32  |
| 17  | 8   | 16  | 10  | 10  | 8   | 12  | 11  | 6   | 9   |
| 17  | 21  | 20  | 18  | 40  | 31  | 34  | 17  | 21  | 19  |
| 20  | 17  | 20  | 32  | 41  | 33  | 33  | 22  | 42  | 16  |
| 45  | 45  | 57  | 43  | 58  | 45  | 52  | 61  | 67  | 35  |
| 47  | 52  | 50  | 100 | 114 | 107 | 95  | 91  | 96  | 56  |
| 69  | 73  | 67  | 70  | 69  | 71  | 81  | 72  | 88  | 73  |
| 47  | 59  | 56  | 59  | 81  | 73  | 77  | 57  | 67  | 34  |
| 43  | 39  | 45  | 30  | 40  | 36  | 51  | 34  | 43  | 39  |
| 41  | 41  | 49  | 45  | 65  | 67  | 59  | 45  | 48  | 39  |
| 65  | 78  | 85  | 539 | 660 | 614 | 791 | 702 | 769 | 366 |
| 50  | 61  | 73  | 98  | 155 | 134 | 177 | 153 | 143 | 95  |
| 40  | 44  | 32  | 54  | 58  | 59  | 41  | 33  | 52  | 26  |
| 72  | 59  | 73  | 46  | 66  | 48  | 56  | 56  | 62  | 73  |
| 33  | 45  | 49  | 75  | 88  | 76  | 81  | 92  | 89  | 47  |
| 32  | 32  | 31  | 87  | 140 | 112 | 152 | 115 | 130 | 67  |
| 31  | 50  | 41  | 38  | 72  | 52  | 48  | 53  | 58  | 43  |
| 106 | 108 | 105 | 245 | 269 | 236 | 233 | 229 | 229 | 146 |
| 62  | 67  | 66  | 97  | 144 | 125 | 105 | 95  | 101 | 50  |
| 34  | 37  | 48  | 43  | 63  | 59  | 52  | 56  | 62  | 37  |
| 36  | 40  | 48  | 44  | 64  | 61  | 46  | 53  | 51  | 47  |
| 42  | 51  | 38  | 50  | 54  | 51  | 37  | 23  | 28  | 35  |
| 30  | 17  | 20  | 31  | 56  | 29  | 35  | 22  | 22  | 36  |
| 35  | 58  | 46  | 45  | 69  | 65  | 87  | 78  | 87  | 46  |
| 18  | 21  | 25  | 42  | 63  | 49  | 23  | 20  | 30  | 19  |
| 13  | 16  | 18  | 17  | 25  | 23  | 14  | 8   | 8   | 11  |
| 61  | 57  | 63  | 182 | 244 | 198 | 179 | 181 | 168 | 96  |
| 76  | 69  | 90  | 155 | 231 | 224 | 260 | 238 | 295 | 133 |
| 67  | 88  | 81  | 151 | 205 | 182 | 132 | 137 | 151 | 91  |
| 33  | 32  | 28  | 73  | 68  | 100 | 90  | 95  | 98  | 47  |
| 43  | 35  | 51  | 91  | 113 | 104 | 96  | 107 | 87  | 58  |
| 153 | 183 | 162 | 86  | 117 | 97  | 97  | 85  | 78  | 66  |
| 119 | 154 | 167 | 222 | 251 | 234 | 148 | 158 | 157 | 140 |
| 47  | 31  | 52  | 68  | 84  | 76  | 43  | 44  | 52  | 34  |
| 53  | 41  | 30  | 83  | 102 | 99  | 75  | 91  | 98  | 54  |



|     |     |     |     |     |     |     |     |     |    |
|-----|-----|-----|-----|-----|-----|-----|-----|-----|----|
| 9   | 19  | 14  | 39  | 50  | 33  | 27  | 25  | 30  | 19 |
| 6   | 5   | 5   | 9   | 4   | 8   | 4   | 4   | 3   | 0  |
| 35  | 23  | 33  | 40  | 34  | 58  | 46  | 47  | 43  | 24 |
| 13  | 13  | 7   | 16  | 25  | 20  | 18  | 18  | 18  | 14 |
| 16  | 19  | 25  | 18  | 16  | 13  | 7   | 15  | 8   | 8  |
| 52  | 54  | 40  | 55  | 70  | 47  | 73  | 71  | 76  | 47 |
| 181 | 173 | 207 | 68  | 72  | 65  | 94  | 93  | 83  | 75 |
| 57  | 37  | 46  | 31  | 32  | 33  | 41  | 56  | 45  | 52 |
| 70  | 72  | 72  | 89  | 83  | 73  | 84  | 69  | 101 | 77 |
| 53  | 55  | 52  | 52  | 57  | 62  | 72  | 70  | 66  | 53 |
| 66  | 68  | 81  | 77  | 65  | 63  | 86  | 87  | 91  | 79 |
| 51  | 52  | 47  | 40  | 72  | 73  | 76  | 76  | 68  | 48 |
| 64  | 85  | 62  | 72  | 92  | 98  | 98  | 81  | 81  | 72 |
| 53  | 56  | 80  | 65  | 67  | 63  | 87  | 84  | 87  | 58 |
| 21  | 24  | 23  | 16  | 16  | 17  | 23  | 9   | 14  | 19 |
| 11  | 13  | 18  | 11  | 13  | 8   | 6   | 3   | 5   | 19 |
| 68  | 75  | 72  | 69  | 110 | 113 | 101 | 85  | 110 | 57 |
| 63  | 60  | 64  | 71  | 100 | 97  | 82  | 57  | 70  | 69 |
| 1   | 0   | 0   | 0   | 0   | 0   | 0   | 1   | 3   | 1  |
| 49  | 55  | 57  | 54  | 72  | 74  | 66  | 72  | 70  | 53 |
| 39  | 48  | 54  | 61  | 73  | 71  | 52  | 61  | 65  | 55 |
| 47  | 34  | 50  | 57  | 62  | 51  | 36  | 43  | 39  | 31 |
| 50  | 53  | 52  | 60  | 55  | 47  | 46  | 50  | 61  | 39 |
| 53  | 38  | 49  | 43  | 42  | 51  | 44  | 34  | 47  | 42 |
| 32  | 25  | 28  | 97  | 112 | 111 | 110 | 83  | 87  | 55 |
| 79  | 80  | 71  | 47  | 67  | 51  | 61  | 46  | 73  | 68 |
| 38  | 43  | 54  | 58  | 54  | 52  | 49  | 36  | 52  | 34 |
| 45  | 56  | 42  | 69  | 80  | 72  | 72  | 55  | 68  | 55 |
| 45  | 43  | 43  | 77  | 84  | 65  | 73  | 78  | 75  | 51 |
| 28  | 28  | 36  | 85  | 73  | 60  | 76  | 76  | 70  | 50 |
| 35  | 26  | 46  | 37  | 53  | 48  | 44  | 40  | 47  | 36 |
| 34  | 27  | 42  | 59  | 90  | 56  | 67  | 61  | 77  | 44 |
| 61  | 63  | 66  | 49  | 71  | 64  | 47  | 48  | 63  | 43 |
| 53  | 59  | 62  | 40  | 45  | 43  | 45  | 55  | 45  | 43 |
| 30  | 30  | 38  | 110 | 149 | 136 | 151 | 147 | 154 | 72 |
| 26  | 25  | 27  | 28  | 36  | 31  | 33  | 31  | 43  | 25 |
| 36  | 34  | 40  | 56  | 80  | 54  | 53  | 64  | 51  | 40 |
| 58  | 48  | 51  | 54  | 62  | 58  | 56  | 38  | 44  | 43 |
| 37  | 33  | 31  | 27  | 37  | 40  | 50  | 33  | 53  | 25 |
| 39  | 57  | 58  | 56  | 81  | 77  | 66  | 65  | 73  | 58 |
| 76  | 85  | 80  | 56  | 64  | 64  | 72  | 65  | 60  | 50 |

|    |    |     |     |     |     |     |     |     |     |
|----|----|-----|-----|-----|-----|-----|-----|-----|-----|
| 33 | 36 | 39  | 22  | 44  | 29  | 27  | 25  | 30  | 35  |
| 44 | 32 | 45  | 98  | 121 | 118 | 91  | 89  | 89  | 52  |
| 37 | 47 | 58  | 143 | 158 | 158 | 219 | 173 | 196 | 70  |
| 21 | 38 | 26  | 90  | 104 | 90  | 103 | 75  | 86  | 42  |
| 15 | 24 | 14  | 49  | 57  | 44  | 38  | 49  | 38  | 31  |
| 26 | 33 | 28  | 26  | 42  | 36  | 43  | 24  | 37  | 31  |
| 97 | 77 | 91  | 72  | 115 | 85  | 157 | 140 | 136 | 97  |
| 90 | 78 | 91  | 128 | 175 | 136 | 130 | 106 | 109 | 80  |
| 49 | 63 | 64  | 83  | 126 | 88  | 116 | 82  | 87  | 60  |
| 49 | 58 | 41  | 48  | 64  | 57  | 63  | 48  | 58  | 54  |
| 36 | 29 | 30  | 22  | 27  | 27  | 25  | 17  | 25  | 31  |
| 13 | 21 | 16  | 15  | 15  | 16  | 20  | 12  | 20  | 24  |
| 31 | 32 | 33  | 21  | 33  | 33  | 41  | 21  | 33  | 24  |
| 16 | 16 | 11  | 8   | 6   | 8   | 11  | 9   | 15  | 13  |
| 3  | 8  | 9   | 1   | 2   | 3   | 3   | 2   | 2   | 4   |
| 35 | 41 | 48  | 76  | 104 | 91  | 90  | 71  | 99  | 53  |
| 7  | 10 | 5   | 2   | 5   | 7   | 3   | 7   | 10  | 9   |
| 21 | 36 | 39  | 9   | 20  | 15  | 20  | 10  | 15  | 14  |
| 30 | 31 | 43  | 31  | 51  | 44  | 51  | 41  | 51  | 36  |
| 31 | 46 | 43  | 84  | 104 | 109 | 75  | 84  | 80  | 61  |
| 30 | 30 | 25  | 13  | 16  | 11  | 11  | 10  | 8   | 31  |
| 37 | 26 | 39  | 30  | 25  | 27  | 27  | 20  | 37  | 31  |
| 67 | 49 | 45  | 54  | 69  | 75  | 68  | 58  | 67  | 55  |
| 34 | 49 | 40  | 42  | 64  | 40  | 62  | 68  | 76  | 36  |
| 46 | 32 | 45  | 33  | 34  | 34  | 28  | 23  | 26  | 27  |
| 64 | 78 | 79  | 84  | 96  | 95  | 77  | 86  | 100 | 66  |
| 45 | 47 | 37  | 98  | 109 | 112 | 87  | 82  | 86  | 55  |
| 32 | 36 | 30  | 41  | 48  | 47  | 44  | 35  | 31  | 25  |
| 16 | 23 | 23  | 36  | 51  | 46  | 41  | 33  | 34  | 22  |
| 44 | 53 | 65  | 122 | 141 | 143 | 152 | 115 | 145 | 95  |
| 44 | 41 | 44  | 50  | 66  | 80  | 58  | 48  | 62  | 42  |
| 33 | 42 | 37  | 55  | 71  | 84  | 65  | 60  | 73  | 34  |
| 67 | 57 | 81  | 107 | 144 | 93  | 132 | 120 | 128 | 81  |
| 37 | 44 | 40  | 85  | 85  | 101 | 53  | 44  | 52  | 41  |
| 96 | 88 | 91  | 137 | 197 | 144 | 137 | 133 | 132 | 96  |
| 16 | 17 | 20  | 10  | 17  | 16  | 8   | 12  | 14  | 13  |
| 18 | 22 | 11  | 3   | 5   | 6   | 12  | 5   | 5   | 9   |
| 15 | 23 | 23  | 12  | 11  | 8   | 7   | 18  | 9   | 15  |
| 37 | 21 | 32  | 69  | 94  | 82  | 115 | 112 | 92  | 54  |
| 98 | 86 | 100 | 101 | 122 | 118 | 159 | 144 | 164 | 100 |
| 77 | 85 | 83  | 120 | 163 | 135 | 176 | 151 | 185 | 106 |

|    |    |    |     |     |     |     |     |     |     |
|----|----|----|-----|-----|-----|-----|-----|-----|-----|
| 63 | 50 | 50 | 42  | 43  | 47  | 56  | 53  | 57  | 47  |
| 29 | 29 | 36 | 99  | 116 | 104 | 101 | 109 | 113 | 66  |
| 72 | 82 | 83 | 41  | 46  | 52  | 40  | 36  | 37  | 44  |
| 51 | 64 | 83 | 83  | 116 | 110 | 87  | 84  | 76  | 68  |
| 45 | 47 | 45 | 75  | 77  | 73  | 48  | 56  | 76  | 36  |
| 60 | 58 | 64 | 40  | 63  | 50  | 34  | 40  | 55  | 42  |
| 40 | 38 | 37 | 62  | 101 | 87  | 93  | 83  | 78  | 41  |
| 45 | 38 | 38 | 62  | 89  | 83  | 53  | 50  | 56  | 50  |
| 66 | 50 | 61 | 63  | 88  | 93  | 73  | 68  | 57  | 61  |
| 25 | 28 | 27 | 43  | 52  | 34  | 52  | 35  | 39  | 25  |
| 16 | 30 | 41 | 38  | 44  | 44  | 33  | 29  | 40  | 31  |
| 26 | 27 | 30 | 24  | 37  | 37  | 34  | 27  | 23  | 31  |
| 54 | 43 | 69 | 79  | 100 | 90  | 81  | 63  | 94  | 45  |
| 57 | 64 | 58 | 64  | 87  | 94  | 67  | 49  | 51  | 55  |
| 36 | 56 | 64 | 146 | 194 | 155 | 104 | 105 | 128 | 63  |
| 43 | 49 | 53 | 90  | 123 | 96  | 70  | 96  | 90  | 68  |
| 43 | 38 | 40 | 67  | 95  | 70  | 57  | 46  | 51  | 45  |
| 33 | 33 | 40 | 97  | 132 | 117 | 143 | 115 | 129 | 62  |
| 40 | 49 | 42 | 579 | 805 | 638 | 819 | 697 | 797 | 336 |
| 67 | 51 | 50 | 207 | 232 | 190 | 157 | 134 | 137 | 78  |
| 40 | 43 | 45 | 59  | 57  | 75  | 55  | 62  | 62  | 47  |
| 45 | 49 | 73 | 324 | 449 | 362 | 462 | 420 | 470 | 167 |
| 34 | 40 | 44 | 48  | 59  | 42  | 46  | 42  | 50  | 41  |
| 53 | 61 | 70 | 36  | 78  | 51  | 87  | 72  | 74  | 61  |
| 46 | 33 | 37 | 153 | 190 | 156 | 199 | 174 | 168 | 83  |
| 51 | 57 | 57 | 60  | 80  | 71  | 118 | 79  | 95  | 61  |
| 72 | 82 | 80 | 68  | 96  | 86  | 114 | 112 | 118 | 92  |
| 38 | 33 | 39 | 98  | 100 | 87  | 104 | 92  | 113 | 53  |
| 36 | 38 | 28 | 82  | 113 | 99  | 135 | 101 | 119 | 44  |
| 33 | 46 | 42 | 48  | 72  | 56  | 69  | 53  | 70  | 35  |
| 17 | 19 | 30 | 42  | 47  | 40  | 51  | 54  | 49  | 25  |
| 30 | 19 | 27 | 41  | 72  | 50  | 50  | 50  | 55  | 29  |
| 52 | 52 | 38 | 54  | 75  | 51  | 59  | 56  | 57  | 37  |
| 87 | 90 | 75 | 83  | 95  | 111 | 85  | 54  | 86  | 82  |
| 66 | 56 | 68 | 48  | 74  | 68  | 51  | 51  | 62  | 33  |
| 17 | 28 | 20 | 20  | 33  | 34  | 32  | 26  | 31  | 32  |
| 50 | 50 | 47 | 121 | 150 | 108 | 91  | 102 | 68  | 64  |
| 39 | 54 | 35 | 89  | 165 | 127 | 104 | 106 | 130 | 72  |
| 29 | 18 | 34 | 31  | 35  | 33  | 48  | 32  | 37  | 36  |
| 21 | 24 | 19 | 13  | 13  | 23  | 16  | 13  | 23  | 20  |
| 25 | 31 | 18 | 21  | 28  | 33  | 15  | 22  | 23  | 23  |

|     |     |     |     |     |     |     |     |     |     |
|-----|-----|-----|-----|-----|-----|-----|-----|-----|-----|
| 42  | 43  | 40  | 89  | 94  | 50  | 99  | 82  | 99  | 53  |
| 52  | 69  | 63  | 74  | 104 | 107 | 107 | 82  | 85  | 71  |
| 49  | 38  | 39  | 60  | 74  | 54  | 60  | 63  | 60  | 45  |
| 44  | 52  | 57  | 102 | 122 | 104 | 125 | 113 | 119 | 73  |
| 35  | 27  | 31  | 42  | 52  | 44  | 46  | 45  | 44  | 38  |
| 33  | 34  | 37  | 19  | 26  | 26  | 29  | 26  | 17  | 23  |
| 72  | 87  | 87  | 128 | 158 | 143 | 121 | 118 | 118 | 77  |
| 60  | 72  | 76  | 81  | 89  | 94  | 73  | 68  | 56  | 55  |
| 72  | 62  | 54  | 67  | 79  | 72  | 39  | 49  | 72  | 44  |
| 187 | 205 | 233 | 135 | 185 | 160 | 149 | 130 | 176 | 170 |
| 50  | 42  | 59  | 70  | 94  | 77  | 45  | 45  | 58  | 32  |
| 95  | 70  | 130 | 91  | 111 | 132 | 115 | 111 | 117 | 105 |
| 47  | 64  | 67  | 44  | 55  | 47  | 51  | 45  | 57  | 40  |
| 54  | 70  | 78  | 69  | 92  | 91  | 71  | 58  | 63  | 56  |
| 48  | 38  | 35  | 70  | 104 | 93  | 111 | 119 | 118 | 47  |
| 35  | 38  | 37  | 47  | 60  | 38  | 48  | 36  | 39  | 38  |
| 16  | 6   | 16  | 15  | 19  | 14  | 10  | 11  | 11  | 7   |
| 41  | 30  | 47  | 46  | 47  | 42  | 48  | 41  | 35  | 37  |
| 32  | 22  | 23  | 28  | 39  | 38  | 37  | 25  | 33  | 19  |
| 24  | 18  | 31  | 17  | 38  | 35  | 28  | 30  | 26  | 15  |
| 15  | 24  | 14  | 38  | 44  | 46  | 25  | 11  | 15  | 18  |
| 39  | 28  | 36  | 52  | 57  | 33  | 55  | 41  | 58  | 28  |
| 54  | 67  | 72  | 68  | 78  | 73  | 56  | 52  | 76  | 70  |
| 53  | 52  | 53  | 47  | 57  | 52  | 44  | 40  | 36  | 33  |
| 69  | 65  | 71  | 193 | 199 | 209 | 197 | 192 | 187 | 113 |
| 31  | 35  | 41  | 22  | 42  | 29  | 32  | 32  | 45  | 30  |
| 48  | 36  | 41  | 167 | 259 | 205 | 204 | 166 | 190 | 80  |
| 35  | 32  | 40  | 51  | 71  | 44  | 55  | 56  | 60  | 55  |
| 75  | 67  | 78  | 156 | 165 | 151 | 151 | 140 | 146 | 76  |
| 40  | 58  | 63  | 65  | 69  | 84  | 56  | 76  | 56  | 71  |
| 83  | 76  | 81  | 156 | 201 | 178 | 213 | 173 | 196 | 96  |
| 45  | 49  | 33  | 39  | 30  | 38  | 48  | 33  | 39  | 33  |
| 62  | 57  | 61  | 60  | 84  | 54  | 69  | 67  | 64  | 72  |
| 42  | 49  | 46  | 76  | 102 | 79  | 61  | 85  | 86  | 66  |
| 38  | 24  | 33  | 36  | 43  | 45  | 48  | 54  | 58  | 46  |
| 51  | 49  | 65  | 68  | 107 | 98  | 62  | 56  | 63  | 51  |
| 49  | 46  | 37  | 42  | 60  | 45  | 52  | 49  | 68  | 52  |
| 63  | 68  | 74  | 91  | 130 | 87  | 81  | 87  | 98  | 60  |
| 66  | 45  | 59  | 96  | 122 | 126 | 121 | 113 | 136 | 64  |
| 10  | 26  | 18  | 16  | 19  | 11  | 17  | 15  | 16  | 13  |
| 58  | 60  | 56  | 55  | 64  | 51  | 65  | 60  | 60  | 65  |

|     |     |     |     |     |     |     |     |     |     |
|-----|-----|-----|-----|-----|-----|-----|-----|-----|-----|
| 36  | 45  | 47  | 40  | 60  | 53  | 58  | 34  | 63  | 37  |
| 73  | 72  | 89  | 98  | 134 | 106 | 129 | 123 | 136 | 108 |
| 74  | 80  | 91  | 156 | 194 | 167 | 152 | 148 | 162 | 118 |
| 43  | 49  | 59  | 72  | 102 | 108 | 107 | 83  | 98  | 56  |
| 47  | 47  | 40  | 122 | 139 | 135 | 121 | 97  | 135 | 58  |
| 50  | 64  | 55  | 58  | 77  | 82  | 86  | 66  | 78  | 62  |
| 58  | 40  | 47  | 36  | 42  | 50  | 31  | 42  | 49  | 40  |
| 31  | 29  | 19  | 67  | 114 | 87  | 84  | 68  | 55  | 28  |
| 20  | 27  | 26  | 36  | 66  | 50  | 31  | 22  | 28  | 23  |
| 34  | 42  | 39  | 77  | 132 | 87  | 53  | 35  | 56  | 45  |
| 44  | 54  | 54  | 76  | 107 | 90  | 58  | 58  | 47  | 58  |
| 15  | 14  | 17  | 12  | 16  | 11  | 10  | 4   | 12  | 17  |
| 96  | 67  | 83  | 94  | 97  | 77  | 77  | 98  | 98  | 77  |
| 58  | 69  | 69  | 76  | 72  | 81  | 79  | 56  | 66  | 64  |
| 37  | 38  | 35  | 22  | 37  | 31  | 42  | 38  | 45  | 38  |
| 27  | 38  | 39  | 29  | 39  | 41  | 33  | 31  | 22  | 40  |
| 34  | 19  | 30  | 29  | 47  | 46  | 24  | 28  | 28  | 34  |
| 46  | 39  | 44  | 50  | 53  | 55  | 34  | 25  | 44  | 22  |
| 65  | 65  | 67  | 67  | 74  | 75  | 57  | 71  | 77  | 71  |
| 31  | 38  | 29  | 44  | 55  | 59  | 44  | 42  | 55  | 38  |
| 57  | 68  | 76  | 285 | 365 | 298 | 337 | 283 | 276 | 109 |
| 22  | 12  | 22  | 16  | 27  | 13  | 17  | 16  | 19  | 18  |
| 34  | 28  | 31  | 289 | 313 | 289 | 243 | 212 | 246 | 83  |
| 19  | 16  | 27  | 138 | 179 | 163 | 134 | 108 | 144 | 61  |
| 18  | 28  | 30  | 180 | 253 | 234 | 192 | 189 | 188 | 68  |
| 27  | 29  | 27  | 93  | 152 | 143 | 124 | 96  | 114 | 63  |
| 74  | 82  | 92  | 117 | 123 | 109 | 116 | 91  | 111 | 91  |
| 56  | 60  | 53  | 79  | 110 | 100 | 81  | 96  | 93  | 63  |
| 32  | 38  | 30  | 67  | 93  | 98  | 74  | 70  | 73  | 53  |
| 57  | 60  | 55  | 71  | 73  | 74  | 80  | 65  | 86  | 47  |
| 52  | 64  | 69  | 116 | 162 | 113 | 132 | 106 | 96  | 79  |
| 63  | 66  | 55  | 69  | 70  | 77  | 62  | 46  | 45  | 57  |
| 85  | 60  | 84  | 284 | 411 | 340 | 419 | 360 | 353 | 185 |
| 79  | 96  | 101 | 328 | 363 | 395 | 354 | 284 | 284 | 164 |
| 45  | 37  | 39  | 270 | 386 | 286 | 268 | 219 | 245 | 89  |
| 46  | 56  | 72  | 131 | 146 | 136 | 134 | 142 | 148 | 81  |
| 64  | 76  | 58  | 87  | 79  | 80  | 102 | 78  | 93  | 77  |
| 52  | 47  | 37  | 61  | 61  | 46  | 64  | 62  | 76  | 45  |
| 263 | 274 | 307 | 138 | 158 | 143 | 209 | 199 | 196 | 243 |
| 26  | 23  | 29  | 9   | 24  | 25  | 17  | 19  | 25  | 30  |
| 30  | 41  | 35  | 40  | 40  | 56  | 62  | 54  | 68  | 53  |

|    |    |     |     |     |     |     |     |     |     |
|----|----|-----|-----|-----|-----|-----|-----|-----|-----|
| 14 | 30 | 11  | 7   | 26  | 14  | 23  | 23  | 29  | 21  |
| 83 | 80 | 101 | 43  | 51  | 50  | 72  | 47  | 70  | 96  |
| 41 | 60 | 56  | 79  | 104 | 76  | 91  | 86  | 92  | 65  |
| 53 | 44 | 61  | 29  | 33  | 24  | 32  | 25  | 30  | 36  |
| 17 | 26 | 29  | 22  | 32  | 24  | 21  | 24  | 27  | 26  |
| 28 | 34 | 23  | 7   | 23  | 20  | 15  | 10  | 25  | 27  |
| 7  | 17 | 14  | 4   | 5   | 3   | 9   | 5   | 9   | 16  |
| 14 | 22 | 15  | 7   | 8   | 16  | 14  | 17  | 12  | 18  |
| 41 | 36 | 62  | 61  | 62  | 48  | 68  | 49  | 67  | 48  |
| 12 | 29 | 21  | 11  | 13  | 9   | 14  | 7   | 10  | 13  |
| 76 | 68 | 80  | 44  | 56  | 55  | 79  | 68  | 88  | 61  |
| 45 | 45 | 53  | 58  | 70  | 56  | 59  | 65  | 78  | 44  |
| 39 | 53 | 42  | 80  | 97  | 85  | 105 | 84  | 92  | 69  |
| 41 | 34 | 45  | 48  | 69  | 53  | 56  | 51  | 53  | 35  |
| 54 | 35 | 47  | 63  | 72  | 82  | 75  | 56  | 69  | 53  |
| 47 | 37 | 52  | 80  | 114 | 113 | 59  | 70  | 61  | 47  |
| 55 | 64 | 78  | 113 | 116 | 128 | 140 | 96  | 125 | 89  |
| 23 | 19 | 23  | 27  | 16  | 28  | 31  | 26  | 25  | 23  |
| 28 | 35 | 33  | 54  | 87  | 69  | 50  | 37  | 53  | 25  |
| 43 | 43 | 33  | 54  | 66  | 50  | 61  | 47  | 48  | 44  |
| 21 | 22 | 23  | 27  | 38  | 24  | 39  | 28  | 20  | 32  |
| 17 | 20 | 18  | 13  | 12  | 14  | 12  | 15  | 9   | 13  |
| 16 | 25 | 28  | 21  | 14  | 12  | 14  | 17  | 15  | 15  |
| 44 | 41 | 33  | 26  | 27  | 16  | 28  | 25  | 26  | 31  |
| 45 | 39 | 36  | 49  | 62  | 48  | 52  | 51  | 65  | 40  |
| 52 | 45 | 47  | 61  | 69  | 66  | 55  | 53  | 58  | 58  |
| 28 | 33 | 30  | 30  | 35  | 23  | 30  | 20  | 37  | 27  |
| 26 | 28 | 29  | 46  | 68  | 61  | 31  | 28  | 32  | 34  |
| 69 | 77 | 80  | 289 | 432 | 395 | 329 | 307 | 335 | 158 |
| 59 | 47 | 71  | 48  | 84  | 95  | 69  | 70  | 71  | 50  |
| 23 | 36 | 36  | 11  | 19  | 22  | 23  | 12  | 22  | 20  |
| 57 | 63 | 59  | 65  | 117 | 82  | 124 | 114 | 129 | 78  |
| 50 | 87 | 68  | 79  | 110 | 91  | 82  | 64  | 66  | 62  |
| 64 | 45 | 69  | 93  | 113 | 110 | 87  | 87  | 78  | 65  |
| 97 | 85 | 90  | 137 | 162 | 136 | 175 | 158 | 163 | 99  |
| 44 | 35 | 37  | 43  | 32  | 36  | 43  | 40  | 43  | 27  |
| 89 | 93 | 103 | 82  | 109 | 109 | 102 | 115 | 131 | 113 |
| 43 | 53 | 37  | 52  | 55  | 61  | 45  | 57  | 46  | 55  |
| 64 | 64 | 72  | 52  | 75  | 76  | 80  | 56  | 62  | 46  |
| 90 | 95 | 109 | 154 | 201 | 184 | 180 | 158 | 173 | 120 |
| 46 | 57 | 65  | 80  | 80  | 87  | 52  | 52  | 73  | 48  |

|    |    |     |     |     |     |     |     |     |    |
|----|----|-----|-----|-----|-----|-----|-----|-----|----|
| 92 | 90 | 103 | 87  | 99  | 91  | 86  | 107 | 118 | 66 |
| 53 | 61 | 48  | 60  | 80  | 84  | 92  | 85  | 111 | 65 |
| 69 | 98 | 75  | 90  | 122 | 99  | 89  | 69  | 79  | 66 |
| 44 | 49 | 54  | 81  | 84  | 86  | 73  | 86  | 102 | 50 |
| 64 | 47 | 43  | 43  | 53  | 64  | 84  | 65  | 82  | 53 |
| 43 | 46 | 49  | 48  | 70  | 63  | 59  | 66  | 61  | 38 |
| 39 | 33 | 47  | 22  | 33  | 30  | 20  | 21  | 15  | 22 |
| 20 | 21 | 35  | 24  | 22  | 27  | 37  | 36  | 27  | 15 |
| 91 | 57 | 61  | 61  | 51  | 57  | 75  | 69  | 79  | 88 |
| 40 | 45 | 38  | 68  | 85  | 56  | 71  | 77  | 74  | 41 |
| 10 | 21 | 18  | 34  | 43  | 31  | 25  | 30  | 16  | 11 |
| 39 | 44 | 35  | 47  | 58  | 49  | 40  | 25  | 47  | 33 |
| 37 | 34 | 45  | 56  | 51  | 65  | 55  | 48  | 45  | 36 |
| 27 | 26 | 34  | 36  | 39  | 38  | 29  | 43  | 45  | 26 |
| 2  | 4  | 5   | 5   | 4   | 4   | 6   | 5   | 5   | 7  |
| 21 | 21 | 21  | 31  | 38  | 39  | 16  | 35  | 30  | 29 |
| 26 | 23 | 30  | 48  | 50  | 47  | 24  | 32  | 25  | 24 |
| 30 | 28 | 37  | 53  | 49  | 61  | 29  | 37  | 39  | 32 |
| 21 | 26 | 18  | 32  | 44  | 31  | 33  | 25  | 25  | 19 |
| 46 | 53 | 57  | 47  | 72  | 47  | 53  | 49  | 55  | 41 |
| 23 | 20 | 19  | 32  | 51  | 31  | 16  | 20  | 20  | 22 |
| 37 | 20 | 32  | 34  | 43  | 32  | 30  | 25  | 30  | 18 |
| 13 | 12 | 19  | 37  | 41  | 30  | 22  | 33  | 26  | 19 |
| 39 | 35 | 43  | 33  | 40  | 47  | 44  | 41  | 38  | 33 |
| 53 | 56 | 52  | 73  | 79  | 83  | 71  | 73  | 65  | 56 |
| 47 | 43 | 40  | 47  | 57  | 48  | 50  | 36  | 51  | 44 |
| 34 | 25 | 34  | 36  | 46  | 44  | 49  | 53  | 51  | 28 |
| 43 | 27 | 37  | 106 | 131 | 105 | 125 | 97  | 123 | 69 |
| 29 | 23 | 24  | 14  | 16  | 11  | 20  | 21  | 18  | 12 |
| 27 | 24 | 25  | 26  | 31  | 30  | 29  | 22  | 26  | 23 |
| 30 | 38 | 55  | 53  | 55  | 47  | 52  | 57  | 72  | 37 |
| 26 | 23 | 25  | 26  | 47  | 52  | 39  | 30  | 37  | 26 |
| 44 | 45 | 33  | 32  | 35  | 26  | 29  | 28  | 30  | 28 |
| 49 | 54 | 37  | 30  | 35  | 44  | 34  | 42  | 37  | 47 |
| 65 | 60 | 60  | 52  | 62  | 62  | 44  | 46  | 45  | 41 |
| 61 | 53 | 68  | 48  | 94  | 70  | 89  | 77  | 103 | 56 |
| 35 | 44 | 52  | 30  | 38  | 23  | 24  | 26  | 29  | 36 |
| 23 | 12 | 22  | 22  | 31  | 27  | 31  | 32  | 23  | 22 |
| 37 | 37 | 33  | 48  | 53  | 40  | 56  | 75  | 49  | 39 |
| 50 | 45 | 51  | 31  | 55  | 41  | 60  | 53  | 37  | 38 |
| 92 | 99 | 95  | 79  | 115 | 105 | 116 | 137 | 130 | 88 |

|     |     |     |     |     |     |     |     |     |     |
|-----|-----|-----|-----|-----|-----|-----|-----|-----|-----|
| 37  | 40  | 47  | 37  | 43  | 41  | 48  | 43  | 39  | 37  |
| 37  | 53  | 56  | 32  | 46  | 34  | 40  | 37  | 47  | 44  |
| 46  | 56  | 75  | 48  | 48  | 45  | 76  | 63  | 70  | 61  |
| 41  | 44  | 50  | 19  | 16  | 14  | 30  | 23  | 27  | 40  |
| 23  | 18  | 34  | 12  | 15  | 16  | 13  | 14  | 17  | 11  |
| 32  | 30  | 36  | 13  | 29  | 24  | 36  | 29  | 39  | 39  |
| 72  | 63  | 85  | 44  | 27  | 36  | 56  | 56  | 57  | 66  |
| 36  | 33  | 41  | 48  | 90  | 66  | 61  | 44  | 57  | 34  |
| 16  | 28  | 42  | 35  | 45  | 49  | 37  | 23  | 33  | 26  |
| 8   | 16  | 22  | 19  | 19  | 19  | 23  | 23  | 28  | 10  |
| 81  | 67  | 68  | 66  | 67  | 78  | 66  | 65  | 62  | 56  |
| 48  | 41  | 46  | 67  | 90  | 59  | 85  | 91  | 83  | 60  |
| 34  | 44  | 52  | 35  | 47  | 48  | 60  | 51  | 54  | 37  |
| 34  | 30  | 59  | 28  | 41  | 32  | 53  | 33  | 42  | 46  |
| 82  | 94  | 105 | 65  | 87  | 61  | 96  | 68  | 91  | 82  |
| 72  | 77  | 86  | 99  | 93  | 84  | 86  | 85  | 68  | 57  |
| 55  | 59  | 74  | 82  | 105 | 99  | 104 | 98  | 111 | 64  |
| 27  | 28  | 27  | 34  | 43  | 57  | 33  | 36  | 23  | 26  |
| 76  | 74  | 80  | 64  | 96  | 89  | 84  | 100 | 83  | 70  |
| 23  | 27  | 36  | 32  | 51  | 51  | 50  | 57  | 56  | 41  |
| 22  | 26  | 26  | 10  | 21  | 22  | 13  | 10  | 15  | 18  |
| 4   | 5   | 12  | 8   | 12  | 12  | 8   | 6   | 9   | 8   |
| 82  | 79  | 117 | 109 | 138 | 144 | 154 | 141 | 135 | 90  |
| 68  | 65  | 82  | 95  | 134 | 109 | 87  | 78  | 100 | 72  |
| 35  | 39  | 54  | 67  | 71  | 70  | 57  | 56  | 60  | 40  |
| 97  | 98  | 114 | 103 | 157 | 142 | 96  | 104 | 104 | 105 |
| 119 | 125 | 122 | 150 | 149 | 168 | 217 | 210 | 232 | 171 |
| 59  | 81  | 77  | 57  | 64  | 65  | 70  | 88  | 84  | 80  |
| 80  | 85  | 97  | 85  | 83  | 83  | 86  | 108 | 96  | 89  |
| 145 | 125 | 142 | 127 | 177 | 188 | 206 | 222 | 206 | 151 |
| 21  | 23  | 21  | 59  | 72  | 64  | 34  | 36  | 55  | 31  |
| 76  | 71  | 89  | 113 | 157 | 129 | 96  | 73  | 99  | 71  |
| 75  | 82  | 95  | 38  | 55  | 30  | 44  | 49  | 56  | 60  |
| 41  | 19  | 28  | 11  | 15  | 15  | 10  | 15  | 23  | 13  |
| 96  | 105 | 118 | 76  | 78  | 100 | 71  | 71  | 72  | 71  |
| 56  | 57  | 52  | 65  | 72  | 62  | 70  | 44  | 50  | 37  |
| 47  | 53  | 53  | 53  | 62  | 75  | 43  | 41  | 51  | 42  |
| 42  | 43  | 56  | 73  | 75  | 76  | 94  | 71  | 65  | 44  |
| 224 | 243 | 255 | 150 | 213 | 174 | 245 | 194 | 197 | 225 |
| 70  | 79  | 81  | 51  | 82  | 75  | 50  | 47  | 53  | 30  |
| 75  | 72  | 94  | 120 | 179 | 195 | 123 | 116 | 137 | 73  |



|     |     |     |     |     |     |     |     |     |     |
|-----|-----|-----|-----|-----|-----|-----|-----|-----|-----|
| 274 | 270 | 330 | 160 | 203 | 183 | 241 | 204 | 233 | 233 |
| 47  | 50  | 51  | 54  | 46  | 60  | 50  | 46  | 43  | 41  |
| 57  | 54  | 66  | 118 | 150 | 119 | 139 | 139 | 157 | 96  |
| 9   | 15  | 9   | 25  | 35  | 29  | 38  | 23  | 37  | 19  |
| 31  | 23  | 27  | 28  | 46  | 38  | 32  | 30  | 24  | 19  |
| 20  | 26  | 23  | 30  | 27  | 27  | 21  | 24  | 25  | 19  |
| 22  | 16  | 28  | 50  | 66  | 62  | 35  | 27  | 40  | 27  |
| 6   | 4   | 2   | 0   | 7   | 5   | 2   | 3   | 2   | 3   |
| 4   | 3   | 3   | 17  | 23  | 14  | 9   | 11  | 14  | 2   |
| 36  | 30  | 47  | 24  | 33  | 30  | 31  | 23  | 28  | 34  |
| 60  | 71  | 65  | 54  | 71  | 58  | 72  | 63  | 87  | 56  |
| 64  | 68  | 60  | 46  | 42  | 53  | 61  | 56  | 54  | 58  |
| 33  | 31  | 45  | 65  | 58  | 38  | 54  | 50  | 66  | 50  |
| 31  | 38  | 33  | 14  | 19  | 14  | 22  | 12  | 13  | 32  |
| 22  | 28  | 34  | 27  | 33  | 26  | 20  | 13  | 19  | 29  |
| 23  | 25  | 27  | 37  | 50  | 43  | 37  | 33  | 52  | 25  |
| 80  | 77  | 105 | 27  | 40  | 34  | 53  | 59  | 61  | 54  |
| 41  | 54  | 37  | 44  | 67  | 43  | 62  | 57  | 71  | 58  |
| 52  | 63  | 59  | 53  | 68  | 52  | 73  | 89  | 76  | 56  |
| 103 | 83  | 110 | 136 | 164 | 157 | 140 | 125 | 157 | 90  |
| 59  | 54  | 59  | 60  | 89  | 71  | 66  | 83  | 75  | 53  |
| 78  | 78  | 83  | 113 | 138 | 143 | 134 | 106 | 121 | 88  |
| 54  | 44  | 61  | 58  | 65  | 55  | 58  | 63  | 71  | 49  |
| 63  | 76  | 80  | 61  | 87  | 63  | 56  | 61  | 77  | 67  |
| 49  | 63  | 40  | 59  | 76  | 77  | 55  | 73  | 74  | 43  |
| 43  | 37  | 53  | 86  | 118 | 80  | 105 | 110 | 118 | 58  |
| 19  | 20  | 20  | 7   | 6   | 15  | 11  | 8   | 16  | 18  |
| 33  | 23  | 29  | 18  | 37  | 26  | 39  | 27  | 18  | 26  |
| 83  | 73  | 82  | 205 | 225 | 243 | 176 | 135 | 145 | 103 |
| 45  | 46  | 41  | 35  | 23  | 33  | 33  | 30  | 39  | 43  |
| 24  | 55  | 49  | 33  | 34  | 34  | 47  | 43  | 53  | 47  |
| 60  | 53  | 65  | 128 | 186 | 150 | 207 | 155 | 205 | 88  |
| 53  | 47  | 77  | 20  | 25  | 18  | 29  | 30  | 31  | 45  |
| 56  | 50  | 67  | 87  | 113 | 95  | 61  | 56  | 58  | 62  |
| 88  | 91  | 101 | 74  | 95  | 82  | 84  | 83  | 75  | 79  |
| 102 | 108 | 114 | 114 | 121 | 95  | 108 | 101 | 109 | 99  |
| 80  | 64  | 85  | 334 | 388 | 333 | 347 | 303 | 319 | 160 |
| 60  | 43  | 57  | 81  | 95  | 84  | 53  | 50  | 44  | 50  |
| 26  | 35  | 33  | 48  | 63  | 48  | 39  | 40  | 40  | 38  |
| 32  | 40  | 35  | 41  | 62  | 42  | 40  | 32  | 28  | 27  |
| 54  | 49  | 69  | 84  | 108 | 93  | 120 | 115 | 111 | 55  |

|     |     |     |     |     |     |     |     |     |     |
|-----|-----|-----|-----|-----|-----|-----|-----|-----|-----|
| 24  | 26  | 21  | 33  | 34  | 28  | 22  | 32  | 31  | 28  |
| 59  | 57  | 71  | 67  | 70  | 58  | 74  | 110 | 102 | 66  |
| 53  | 70  | 70  | 81  | 106 | 100 | 173 | 163 | 167 | 89  |
| 44  | 31  | 34  | 21  | 32  | 35  | 39  | 32  | 41  | 47  |
| 50  | 57  | 61  | 56  | 52  | 66  | 70  | 63  | 72  | 53  |
| 63  | 78  | 61  | 94  | 127 | 97  | 103 | 88  | 114 | 79  |
| 47  | 50  | 45  | 53  | 64  | 48  | 56  | 57  | 56  | 38  |
| 63  | 91  | 77  | 50  | 64  | 67  | 84  | 81  | 76  | 71  |
| 142 | 181 | 195 | 88  | 104 | 93  | 160 | 140 | 148 | 145 |
| 43  | 47  | 49  | 58  | 72  | 69  | 83  | 83  | 78  | 41  |
| 40  | 44  | 40  | 36  | 38  | 37  | 36  | 54  | 45  | 31  |
| 40  | 44  | 45  | 40  | 33  | 25  | 49  | 46  | 61  | 38  |
| 53  | 47  | 63  | 53  | 74  | 56  | 61  | 46  | 57  | 52  |
| 10  | 16  | 8   | 5   | 5   | 8   | 4   | 12  | 9   | 5   |
| 38  | 26  | 36  | 105 | 152 | 95  | 80  | 81  | 72  | 47  |
| 30  | 42  | 38  | 36  | 49  | 36  | 37  | 36  | 38  | 27  |
| 59  | 68  | 72  | 97  | 123 | 106 | 94  | 78  | 96  | 48  |
| 53  | 53  | 58  | 50  | 86  | 56  | 61  | 57  | 76  | 45  |
| 71  | 58  | 74  | 103 | 149 | 108 | 142 | 165 | 162 | 85  |
| 22  | 15  | 24  | 25  | 44  | 27  | 38  | 26  | 30  | 17  |
| 99  | 89  | 111 | 125 | 154 | 138 | 208 | 163 | 198 | 108 |
| 54  | 67  | 59  | 50  | 70  | 51  | 49  | 68  | 85  | 63  |
| 54  | 43  | 44  | 43  | 67  | 58  | 69  | 50  | 63  | 45  |
| 28  | 23  | 32  | 25  | 33  | 17  | 27  | 19  | 25  | 25  |
| 48  | 50  | 46  | 90  | 119 | 89  | 150 | 145 | 154 | 73  |
| 15  | 14  | 19  | 18  | 27  | 29  | 32  | 22  | 18  | 9   |
| 50  | 55  | 56  | 25  | 44  | 35  | 32  | 25  | 36  | 33  |
| 27  | 38  | 21  | 21  | 32  | 36  | 44  | 28  | 38  | 30  |
| 37  | 33  | 39  | 94  | 107 | 109 | 118 | 91  | 115 | 66  |
| 18  | 16  | 32  | 50  | 64  | 58  | 49  | 45  | 62  | 29  |
| 11  | 12  | 18  | 48  | 70  | 53  | 31  | 28  | 29  | 27  |
| 53  | 49  | 56  | 62  | 64  | 69  | 51  | 56  | 72  | 35  |
| 64  | 73  | 76  | 110 | 112 | 111 | 80  | 85  | 92  | 66  |
| 60  | 56  | 57  | 80  | 127 | 84  | 92  | 97  | 104 | 66  |
| 73  | 62  | 81  | 262 | 384 | 320 | 480 | 354 | 415 | 213 |
| 13  | 21  | 11  | 11  | 13  | 16  | 15  | 19  | 17  | 17  |
| 38  | 50  | 44  | 55  | 74  | 51  | 43  | 39  | 60  | 30  |
| 34  | 52  | 50  | 53  | 72  | 64  | 50  | 42  | 49  | 34  |
| 18  | 18  | 37  | 39  | 32  | 29  | 36  | 25  | 34  | 14  |
| 9   | 7   | 17  | 7   | 14  | 19  | 9   | 8   | 18  | 18  |
| 38  | 35  | 40  | 41  | 54  | 38  | 40  | 27  | 43  | 27  |

|     |     |     |     |     |     |     |     |     |     |
|-----|-----|-----|-----|-----|-----|-----|-----|-----|-----|
| 17  | 22  | 17  | 14  | 20  | 17  | 16  | 25  | 18  | 13  |
| 9   | 13  | 6   | 7   | 11  | 9   | 11  | 9   | 18  | 6   |
| 36  | 28  | 40  | 19  | 21  | 16  | 21  | 19  | 12  | 38  |
| 0   | 0   | 1   | 2   | 2   | 1   | 1   | 1   | 0   | 0   |
| 14  | 18  | 22  | 22  | 20  | 20  | 28  | 21  | 30  | 17  |
| 51  | 58  | 70  | 41  | 45  | 42  | 61  | 50  | 41  | 47  |
| 77  | 78  | 89  | 112 | 113 | 97  | 189 | 180 | 177 | 95  |
| 48  | 31  | 33  | 40  | 54  | 51  | 45  | 67  | 58  | 39  |
| 24  | 15  | 36  | 24  | 34  | 25  | 32  | 28  | 17  | 17  |
| 43  | 47  | 54  | 45  | 65  | 44  | 62  | 35  | 46  | 53  |
| 81  | 66  | 76  | 45  | 47  | 53  | 58  | 60  | 72  | 67  |
| 56  | 74  | 63  | 56  | 60  | 71  | 87  | 68  | 85  | 56  |
| 43  | 42  | 23  | 44  | 39  | 48  | 38  | 27  | 32  | 29  |
| 8   | 15  | 7   | 4   | 7   | 8   | 9   | 9   | 7   | 5   |
| 65  | 72  | 74  | 69  | 75  | 74  | 73  | 71  | 90  | 57  |
| 38  | 21  | 37  | 31  | 43  | 36  | 41  | 43  | 38  | 25  |
| 31  | 38  | 44  | 55  | 67  | 51  | 62  | 57  | 60  | 38  |
| 40  | 37  | 39  | 46  | 60  | 42  | 70  | 56  | 47  | 40  |
| 41  | 42  | 50  | 27  | 31  | 30  | 37  | 33  | 40  | 33  |
| 5   | 8   | 10  | 7   | 6   | 5   | 6   | 2   | 7   | 8   |
| 60  | 50  | 59  | 78  | 108 | 91  | 74  | 54  | 86  | 43  |
| 84  | 75  | 78  | 104 | 116 | 117 | 97  | 98  | 109 | 67  |
| 65  | 48  | 74  | 66  | 85  | 66  | 90  | 106 | 106 | 72  |
| 42  | 51  | 47  | 44  | 67  | 35  | 50  | 40  | 33  | 31  |
| 87  | 65  | 67  | 94  | 104 | 94  | 95  | 77  | 107 | 57  |
| 36  | 44  | 51  | 59  | 65  | 80  | 46  | 44  | 52  | 35  |
| 48  | 42  | 62  | 54  | 93  | 56  | 91  | 59  | 68  | 39  |
| 98  | 102 | 109 | 59  | 59  | 53  | 88  | 80  | 87  | 71  |
| 242 | 288 | 261 | 190 | 236 | 208 | 228 | 152 | 186 | 235 |
| 163 | 136 | 156 | 155 | 172 | 144 | 186 | 185 | 181 | 146 |
| 48  | 52  | 66  | 57  | 81  | 62  | 49  | 62  | 50  | 38  |
| 92  | 71  | 93  | 67  | 110 | 92  | 86  | 82  | 85  | 66  |
| 75  | 55  | 61  | 67  | 69  | 62  | 77  | 77  | 100 | 55  |
| 37  | 39  | 50  | 43  | 58  | 64  | 42  | 38  | 37  | 44  |
| 30  | 24  | 28  | 44  | 56  | 67  | 35  | 37  | 32  | 33  |
| 33  | 39  | 61  | 199 | 229 | 202 | 319 | 315 | 319 | 120 |
| 42  | 28  | 58  | 94  | 112 | 101 | 96  | 105 | 122 | 53  |
| 29  | 41  | 42  | 86  | 126 | 95  | 57  | 61  | 67  | 33  |
| 34  | 33  | 35  | 42  | 25  | 26  | 40  | 32  | 43  | 34  |
| 17  | 32  | 20  | 12  | 15  | 20  | 13  | 12  | 15  | 17  |
| 28  | 33  | 35  | 16  | 20  | 14  | 17  | 12  | 21  | 18  |

|    |    |    |     |     |     |     |     |     |     |
|----|----|----|-----|-----|-----|-----|-----|-----|-----|
| 47 | 44 | 51 | 98  | 119 | 87  | 119 | 118 | 104 | 65  |
| 45 | 52 | 58 | 74  | 73  | 88  | 108 | 106 | 96  | 60  |
| 14 | 14 | 24 | 53  | 46  | 38  | 13  | 10  | 15  | 14  |
| 3  | 2  | 3  | 2   | 4   | 3   | 0   | 5   | 0   | 0   |
| 22 | 30 | 28 | 36  | 40  | 30  | 35  | 28  | 25  | 18  |
| 30 | 35 | 34 | 28  | 27  | 31  | 25  | 25  | 23  | 35  |
| 10 | 11 | 17 | 35  | 62  | 52  | 17  | 18  | 22  | 21  |
| 53 | 50 | 37 | 67  | 82  | 81  | 78  | 88  | 97  | 51  |
| 61 | 70 | 89 | 93  | 80  | 108 | 117 | 111 | 123 | 85  |
| 93 | 93 | 94 | 232 | 253 | 227 | 203 | 195 | 225 | 119 |
| 42 | 54 | 38 | 77  | 126 | 93  | 89  | 86  | 85  | 48  |
| 54 | 61 | 73 | 110 | 104 | 103 | 106 | 89  | 145 | 53  |
| 74 | 75 | 72 | 64  | 104 | 63  | 57  | 76  | 91  | 79  |
| 52 | 58 | 74 | 139 | 176 | 144 | 155 | 151 | 148 | 85  |
| 28 | 38 | 47 | 29  | 51  | 33  | 55  | 33  | 52  | 38  |
| 22 | 35 | 27 | 25  | 27  | 25  | 26  | 17  | 11  | 22  |
| 53 | 34 | 44 | 98  | 95  | 71  | 124 | 110 | 129 | 78  |
| 22 | 11 | 20 | 17  | 20  | 11  | 10  | 9   | 11  | 15  |
| 37 | 45 | 46 | 47  | 61  | 42  | 47  | 53  | 47  | 33  |
| 81 | 78 | 66 | 58  | 82  | 64  | 62  | 66  | 68  | 72  |
| 18 | 28 | 20 | 13  | 22  | 24  | 21  | 13  | 23  | 22  |
| 41 | 43 | 45 | 35  | 43  | 45  | 50  | 50  | 56  | 50  |
| 42 | 49 | 57 | 44  | 54  | 44  | 54  | 45  | 57  | 37  |
| 53 | 47 | 48 | 41  | 58  | 57  | 49  | 49  | 54  | 46  |
| 13 | 12 | 13 | 12  | 16  | 10  | 15  | 17  | 25  | 15  |
| 27 | 23 | 29 | 67  | 84  | 75  | 99  | 78  | 89  | 52  |
| 59 | 54 | 71 | 102 | 152 | 120 | 149 | 140 | 138 | 99  |
| 59 | 55 | 61 | 109 | 161 | 120 | 276 | 231 | 240 | 113 |
| 71 | 60 | 77 | 125 | 150 | 109 | 172 | 151 | 149 | 81  |
| 46 | 49 | 59 | 114 | 139 | 123 | 181 | 169 | 154 | 66  |
| 57 | 63 | 75 | 183 | 272 | 252 | 202 | 205 | 193 | 109 |
| 79 | 75 | 78 | 180 | 178 | 183 | 242 | 194 | 231 | 121 |
| 63 | 56 | 67 | 112 | 164 | 148 | 136 | 160 | 165 | 89  |
| 49 | 49 | 47 | 102 | 125 | 126 | 110 | 102 | 120 | 57  |
| 25 | 32 | 29 | 12  | 21  | 15  | 16  | 36  | 18  | 20  |
| 24 | 27 | 24 | 26  | 35  | 33  | 29  | 21  | 40  | 22  |
| 26 | 34 | 37 | 100 | 108 | 102 | 99  | 105 | 89  | 61  |
| 33 | 38 | 43 | 76  | 91  | 83  | 91  | 95  | 109 | 46  |
| 22 | 22 | 22 | 45  | 63  | 39  | 78  | 60  | 73  | 38  |
| 51 | 46 | 52 | 117 | 143 | 103 | 149 | 165 | 163 | 55  |
| 61 | 41 | 67 | 77  | 108 | 92  | 75  | 81  | 78  | 56  |

|     |     |     |     |     |     |     |     |     |     |
|-----|-----|-----|-----|-----|-----|-----|-----|-----|-----|
| 106 | 96  | 102 | 94  | 119 | 87  | 141 | 151 | 171 | 112 |
| 15  | 21  | 19  | 14  | 19  | 23  | 18  | 15  | 13  | 21  |
| 59  | 64  | 77  | 37  | 31  | 34  | 53  | 33  | 60  | 51  |
| 40  | 38  | 46  | 49  | 46  | 55  | 81  | 74  | 84  | 42  |
| 105 | 72  | 121 | 104 | 131 | 120 | 127 | 107 | 104 | 93  |
| 57  | 45  | 60  | 42  | 59  | 47  | 58  | 50  | 51  | 57  |
| 74  | 90  | 111 | 67  | 73  | 62  | 75  | 76  | 80  | 89  |
| 105 | 107 | 108 | 91  | 116 | 117 | 107 | 113 | 97  | 56  |
| 67  | 64  | 76  | 212 | 195 | 230 | 189 | 183 | 187 | 81  |
| 60  | 48  | 61  | 123 | 137 | 145 | 185 | 171 | 191 | 87  |
| 90  | 81  | 89  | 87  | 111 | 90  | 115 | 128 | 109 | 65  |
| 23  | 15  | 27  | 44  | 59  | 57  | 29  | 21  | 19  | 22  |
| 62  | 55  | 70  | 90  | 109 | 95  | 100 | 117 | 148 | 75  |
| 40  | 43  | 62  | 62  | 71  | 69  | 68  | 77  | 90  | 63  |
| 93  | 88  | 97  | 224 | 289 | 258 | 284 | 242 | 296 | 147 |
| 58  | 62  | 64  | 129 | 169 | 134 | 99  | 111 | 114 | 66  |
| 38  | 43  | 43  | 39  | 55  | 61  | 41  | 42  | 37  | 41  |
| 70  | 91  | 101 | 88  | 145 | 134 | 98  | 120 | 121 | 66  |
| 115 | 96  | 115 | 96  | 146 | 135 | 150 | 141 | 131 | 130 |
| 83  | 100 | 76  | 95  | 133 | 111 | 109 | 104 | 101 | 74  |
| 49  | 46  | 50  | 41  | 32  | 49  | 56  | 70  | 69  | 45  |
| 21  | 19  | 20  | 20  | 30  | 20  | 28  | 21  | 22  | 21  |
| 14  | 20  | 35  | 30  | 35  | 36  | 27  | 19  | 34  | 22  |
| 25  | 31  | 31  | 91  | 93  | 81  | 82  | 74  | 74  | 39  |
| 9   | 5   | 8   | 4   | 10  | 6   | 4   | 8   | 6   | 4   |
| 29  | 22  | 33  | 26  | 27  | 22  | 30  | 24  | 20  | 25  |
| 49  | 56  | 59  | 96  | 104 | 90  | 104 | 94  | 102 | 67  |
| 49  | 44  | 62  | 73  | 84  | 84  | 95  | 78  | 98  | 70  |
| 43  | 39  | 38  | 120 | 147 | 134 | 185 | 176 | 197 | 92  |
| 57  | 50  | 73  | 110 | 186 | 180 | 244 | 193 | 219 | 97  |
| 51  | 56  | 51  | 74  | 89  | 82  | 74  | 77  | 68  | 64  |
| 35  | 47  | 40  | 89  | 108 | 117 | 116 | 103 | 121 | 60  |
| 75  | 79  | 68  | 143 | 158 | 155 | 130 | 114 | 123 | 89  |
| 40  | 28  | 39  | 45  | 51  | 43  | 34  | 46  | 38  | 34  |
| 44  | 57  | 42  | 67  | 97  | 87  | 69  | 64  | 75  | 42  |
| 65  | 68  | 87  | 106 | 152 | 145 | 147 | 138 | 138 | 81  |
| 19  | 44  | 37  | 51  | 40  | 38  | 43  | 38  | 48  | 32  |
| 10  | 9   | 13  | 32  | 49  | 50  | 27  | 23  | 32  | 14  |
| 42  | 33  | 42  | 12  | 26  | 22  | 31  | 24  | 35  | 27  |
| 47  | 41  | 51  | 55  | 54  | 50  | 44  | 43  | 57  | 48  |
| 36  | 23  | 28  | 30  | 53  | 45  | 45  | 41  | 48  | 23  |

|     |     |     |     |     |     |     |     |     |     |
|-----|-----|-----|-----|-----|-----|-----|-----|-----|-----|
| 55  | 53  | 64  | 39  | 36  | 34  | 37  | 56  | 42  | 42  |
| 43  | 50  | 55  | 42  | 44  | 33  | 37  | 37  | 46  | 37  |
| 54  | 46  | 53  | 50  | 66  | 40  | 70  | 55  | 65  | 43  |
| 40  | 51  | 55  | 55  | 103 | 77  | 66  | 60  | 75  | 39  |
| 49  | 47  | 60  | 123 | 189 | 134 | 157 | 142 | 142 | 77  |
| 39  | 54  | 34  | 20  | 50  | 46  | 59  | 47  | 46  | 33  |
| 45  | 42  | 69  | 26  | 65  | 55  | 68  | 32  | 55  | 49  |
| 38  | 54  | 67  | 52  | 58  | 44  | 70  | 91  | 68  | 51  |
| 29  | 31  | 37  | 50  | 69  | 55  | 62  | 51  | 70  | 40  |
| 34  | 44  | 34  | 47  | 69  | 61  | 40  | 58  | 63  | 40  |
| 38  | 51  | 52  | 65  | 73  | 72  | 46  | 39  | 55  | 42  |
| 50  | 49  | 43  | 55  | 40  | 46  | 54  | 52  | 75  | 43  |
| 84  | 80  | 104 | 85  | 112 | 97  | 124 | 101 | 120 | 61  |
| 55  | 71  | 81  | 121 | 166 | 155 | 129 | 118 | 116 | 90  |
| 43  | 56  | 49  | 47  | 43  | 52  | 71  | 80  | 67  | 41  |
| 54  | 64  | 50  | 77  | 71  | 81  | 74  | 71  | 62  | 59  |
| 124 | 145 | 162 | 178 | 222 | 189 | 232 | 229 | 241 | 157 |
| 30  | 29  | 33  | 23  | 30  | 13  | 25  | 19  | 23  | 18  |
| 41  | 38  | 45  | 35  | 47  | 46  | 56  | 40  | 62  | 47  |
| 86  | 92  | 122 | 133 | 160 | 136 | 267 | 209 | 240 | 139 |
| 12  | 11  | 8   | 21  | 24  | 17  | 25  | 21  | 23  | 9   |
| 19  | 17  | 17  | 28  | 37  | 31  | 38  | 32  | 32  | 14  |
| 11  | 11  | 7   | 8   | 15  | 8   | 17  | 8   | 12  | 14  |
| 16  | 20  | 26  | 19  | 22  | 16  | 29  | 27  | 16  | 18  |
| 19  | 18  | 17  | 28  | 28  | 15  | 31  | 25  | 21  | 14  |
| 22  | 40  | 43  | 46  | 76  | 44  | 56  | 52  | 63  | 35  |
| 24  | 26  | 27  | 35  | 46  | 35  | 47  | 30  | 43  | 31  |
| 39  | 31  | 26  | 114 | 131 | 97  | 142 | 119 | 135 | 44  |
| 60  | 57  | 55  | 294 | 350 | 309 | 429 | 336 | 330 | 149 |
| 62  | 57  | 53  | 139 | 145 | 155 | 140 | 139 | 164 | 72  |
| 70  | 71  | 71  | 153 | 185 | 153 | 152 | 129 | 125 | 83  |
| 25  | 26  | 24  | 23  | 33  | 27  | 32  | 33  | 36  | 27  |
| 8   | 17  | 10  | 8   | 5   | 7   | 4   | 5   | 4   | 7   |
| 41  | 28  | 51  | 37  | 41  | 36  | 34  | 29  | 41  | 41  |
| 24  | 31  | 32  | 42  | 32  | 35  | 37  | 21  | 35  | 30  |
| 42  | 40  | 32  | 31  | 30  | 27  | 35  | 32  | 31  | 41  |
| 27  | 17  | 23  | 22  | 45  | 29  | 33  | 27  | 38  | 30  |
| 36  | 40  | 34  | 54  | 66  | 47  | 48  | 35  | 46  | 34  |
| 124 | 126 | 153 | 92  | 113 | 97  | 93  | 102 | 99  | 135 |
| 52  | 32  | 43  | 41  | 49  | 54  | 42  | 45  | 51  | 35  |
| 24  | 16  | 13  | 24  | 31  | 25  | 40  | 32  | 38  | 17  |

|     |    |     |     |     |     |     |     |     |     |
|-----|----|-----|-----|-----|-----|-----|-----|-----|-----|
| 38  | 46 | 33  | 73  | 115 | 79  | 96  | 95  | 88  | 42  |
| 45  | 46 | 51  | 44  | 78  | 77  | 59  | 57  | 51  | 43  |
| 36  | 54 | 46  | 60  | 66  | 63  | 59  | 64  | 65  | 46  |
| 67  | 52 | 69  | 107 | 122 | 105 | 119 | 107 | 102 | 52  |
| 75  | 65 | 69  | 57  | 78  | 73  | 65  | 50  | 71  | 52  |
| 107 | 98 | 119 | 71  | 111 | 93  | 143 | 136 | 115 | 116 |
| 37  | 37 | 57  | 29  | 29  | 37  | 38  | 38  | 27  | 30  |
| 13  | 21 | 16  | 17  | 28  | 17  | 22  | 16  | 15  | 15  |
| 30  | 32 | 28  | 40  | 60  | 47  | 53  | 59  | 68  | 47  |
| 62  | 77 | 78  | 38  | 52  | 43  | 61  | 46  | 50  | 66  |
| 93  | 86 | 126 | 69  | 87  | 90  | 98  | 78  | 84  | 100 |
| 77  | 83 | 89  | 78  | 98  | 99  | 116 | 74  | 78  | 98  |
| 95  | 96 | 74  | 73  | 67  | 64  | 64  | 74  | 58  | 67  |
| 27  | 27 | 24  | 24  | 28  | 10  | 20  | 19  | 37  | 35  |
| 59  | 66 | 83  | 97  | 94  | 95  | 123 | 86  | 110 | 70  |
| 8   | 9  | 15  | 4   | 13  | 5   | 10  | 10  | 4   | 5   |
| 65  | 83 | 81  | 58  | 58  | 57  | 54  | 54  | 64  | 61  |
| 48  | 58 | 71  | 111 | 123 | 125 | 130 | 139 | 156 | 80  |
| 56  | 72 | 55  | 47  | 49  | 43  | 57  | 52  | 44  | 39  |
| 23  | 28 | 38  | 25  | 22  | 27  | 26  | 27  | 31  | 24  |
| 19  | 23 | 21  | 25  | 26  | 26  | 22  | 17  | 21  | 27  |
| 19  | 11 | 21  | 19  | 29  | 20  | 29  | 26  | 28  | 24  |
| 24  | 29 | 33  | 33  | 31  | 35  | 34  | 43  | 44  | 32  |
| 36  | 37 | 42  | 109 | 131 | 96  | 154 | 107 | 130 | 66  |
| 30  | 20 | 20  | 30  | 42  | 48  | 33  | 37  | 44  | 27  |
| 55  | 61 | 69  | 105 | 147 | 106 | 123 | 123 | 115 | 50  |
| 40  | 45 | 47  | 145 | 206 | 155 | 160 | 135 | 166 | 79  |
| 19  | 14 | 19  | 10  | 9   | 18  | 9   | 11  | 10  | 16  |
| 68  | 63 | 57  | 48  | 40  | 47  | 56  | 41  | 37  | 47  |
| 25  | 40 | 31  | 28  | 36  | 31  | 22  | 32  | 21  | 23  |
| 34  | 31 | 47  | 30  | 35  | 37  | 26  | 34  | 28  | 29  |
| 26  | 26 | 22  | 14  | 23  | 24  | 25  | 18  | 23  | 21  |
| 49  | 27 | 56  | 32  | 38  | 48  | 46  | 35  | 42  | 28  |
| 12  | 19 | 19  | 7   | 3   | 2   | 4   | 4   | 7   | 12  |
| 64  | 74 | 64  | 65  | 71  | 53  | 50  | 51  | 41  | 41  |
| 34  | 37 | 36  | 31  | 45  | 33  | 41  | 44  | 33  | 40  |
| 48  | 58 | 68  | 72  | 103 | 106 | 77  | 88  | 88  | 73  |
| 57  | 47 | 52  | 84  | 91  | 86  | 93  | 73  | 95  | 56  |
| 21  | 24 | 26  | 24  | 31  | 31  | 34  | 46  | 40  | 19  |
| 44  | 51 | 61  | 44  | 53  | 43  | 41  | 35  | 33  | 37  |
| 50  | 45 | 49  | 54  | 60  | 74  | 76  | 70  | 85  | 37  |

|     |     |     |     |     |     |     |     |     |     |
|-----|-----|-----|-----|-----|-----|-----|-----|-----|-----|
| 28  | 33  | 35  | 30  | 52  | 38  | 44  | 47  | 47  | 38  |
| 48  | 65  | 66  | 56  | 47  | 58  | 56  | 35  | 42  | 49  |
| 40  | 52  | 62  | 68  | 91  | 62  | 90  | 88  | 72  | 52  |
| 43  | 36  | 48  | 37  | 50  | 51  | 66  | 47  | 45  | 40  |
| 129 | 120 | 144 | 86  | 116 | 101 | 145 | 111 | 113 | 149 |
| 50  | 44  | 47  | 69  | 79  | 73  | 74  | 62  | 78  | 38  |
| 48  | 47  | 55  | 43  | 63  | 48  | 58  | 60  | 66  | 45  |
| 24  | 28  | 23  | 36  | 57  | 48  | 25  | 20  | 26  | 27  |
| 30  | 47  | 48  | 37  | 32  | 39  | 42  | 31  | 50  | 40  |
| 39  | 31  | 41  | 37  | 47  | 37  | 38  | 35  | 35  | 36  |
| 46  | 45  | 52  | 106 | 131 | 124 | 102 | 93  | 102 | 62  |
| 51  | 61  | 58  | 40  | 53  | 46  | 59  | 44  | 59  | 48  |
| 34  | 39  | 41  | 29  | 44  | 31  | 44  | 31  | 45  | 35  |
| 24  | 34  | 27  | 25  | 28  | 30  | 37  | 31  | 23  | 25  |
| 11  | 24  | 23  | 14  | 22  | 24  | 21  | 19  | 15  | 14  |
| 25  | 31  | 29  | 32  | 27  | 27  | 38  | 51  | 40  | 33  |
| 47  | 37  | 60  | 39  | 46  | 46  | 59  | 41  | 40  | 44  |
| 28  | 36  | 33  | 55  | 76  | 63  | 26  | 35  | 24  | 34  |
| 48  | 34  | 48  | 61  | 48  | 67  | 40  | 48  | 46  | 30  |
| 16  | 18  | 13  | 9   | 20  | 12  | 10  | 15  | 16  | 18  |
| 21  | 20  | 27  | 45  | 38  | 31  | 30  | 22  | 27  | 17  |
| 16  | 18  | 27  | 15  | 22  | 20  | 15  | 19  | 19  | 18  |
| 16  | 30  | 19  | 7   | 12  | 10  | 10  | 11  | 6   | 18  |
| 21  | 15  | 28  | 17  | 18  | 24  | 13  | 11  | 11  | 23  |
| 34  | 22  | 24  | 17  | 14  | 19  | 26  | 24  | 24  | 31  |
| 12  | 7   | 8   | 9   | 5   | 6   | 5   | 5   | 8   | 8   |
| 11  | 13  | 21  | 14  | 17  | 21  | 16  | 25  | 20  | 11  |
| 18  | 19  | 13  | 17  | 11  | 19  | 11  | 8   | 10  | 9   |
| 16  | 27  | 17  | 3   | 10  | 10  | 12  | 7   | 12  | 17  |
| 22  | 15  | 16  | 9   | 18  | 11  | 14  | 14  | 10  | 13  |
| 35  | 32  | 35  | 37  | 42  | 44  | 47  | 30  | 39  | 28  |
| 127 | 125 | 156 | 73  | 80  | 91  | 113 | 106 | 126 | 83  |
| 15  | 13  | 15  | 41  | 52  | 39  | 34  | 41  | 26  | 19  |
| 10  | 7   | 23  | 20  | 27  | 22  | 25  | 22  | 21  | 13  |
| 28  | 31  | 30  | 103 | 156 | 103 | 100 | 76  | 93  | 55  |
| 40  | 34  | 38  | 67  | 101 | 82  | 93  | 67  | 73  | 38  |
| 22  | 17  | 13  | 35  | 32  | 35  | 39  | 28  | 42  | 27  |
| 49  | 39  | 59  | 33  | 41  | 40  | 27  | 30  | 35  | 25  |
| 53  | 53  | 38  | 40  | 43  | 36  | 42  | 38  | 32  | 31  |
| 29  | 38  | 38  | 36  | 44  | 38  | 42  | 49  | 55  | 47  |
| 26  | 28  | 28  | 30  | 39  | 38  | 29  | 27  | 38  | 29  |



|     |     |     |     |     |     |     |     |     |     |
|-----|-----|-----|-----|-----|-----|-----|-----|-----|-----|
| 57  | 53  | 52  | 33  | 26  | 18  | 42  | 37  | 51  | 44  |
| 58  | 62  | 58  | 35  | 64  | 20  | 38  | 44  | 50  | 40  |
| 187 | 210 | 234 | 134 | 169 | 147 | 225 | 227 | 290 | 170 |
| 67  | 62  | 56  | 45  | 66  | 74  | 55  | 62  | 77  | 54  |
| 44  | 44  | 40  | 22  | 41  | 28  | 42  | 40  | 41  | 35  |
| 88  | 82  | 95  | 115 | 128 | 114 | 136 | 92  | 103 | 74  |
| 24  | 24  | 27  | 24  | 37  | 32  | 27  | 22  | 25  | 21  |
| 84  | 58  | 78  | 52  | 63  | 66  | 53  | 45  | 53  | 55  |
| 50  | 68  | 59  | 70  | 102 | 90  | 80  | 77  | 68  | 51  |
| 41  | 51  | 63  | 83  | 127 | 99  | 90  | 106 | 111 | 60  |
| 55  | 45  | 65  | 40  | 59  | 57  | 33  | 27  | 32  | 41  |
| 50  | 44  | 50  | 45  | 50  | 58  | 54  | 54  | 47  | 39  |
| 28  | 44  | 37  | 28  | 39  | 27  | 39  | 39  | 27  | 30  |
| 74  | 78  | 78  | 52  | 79  | 57  | 65  | 63  | 76  | 53  |
| 47  | 49  | 54  | 53  | 59  | 46  | 67  | 59  | 44  | 43  |
| 61  | 52  | 47  | 41  | 46  | 50  | 53  | 54  | 51  | 50  |
| 40  | 49  | 34  | 29  | 43  | 31  | 44  | 45  | 39  | 41  |
| 39  | 49  | 45  | 45  | 59  | 54  | 92  | 77  | 78  | 69  |
| 4   | 4   | 3   | 2   | 3   | 5   | 4   | 9   | 11  | 8   |
| 2   | 4   | 4   | 10  | 11  | 7   | 7   | 14  | 12  | 7   |
| 18  | 25  | 23  | 32  | 50  | 48  | 62  | 66  | 66  | 37  |
| 41  | 45  | 39  | 36  | 42  | 47  | 63  | 53  | 62  | 38  |
| 28  | 39  | 34  | 108 | 169 | 107 | 147 | 144 | 156 | 69  |
| 25  | 22  | 27  | 34  | 37  | 30  | 39  | 28  | 18  | 22  |
| 17  | 29  | 31  | 75  | 77  | 89  | 72  | 57  | 81  | 40  |
| 68  | 75  | 69  | 124 | 163 | 130 | 155 | 119 | 146 | 71  |
| 29  | 29  | 35  | 86  | 97  | 95  | 100 | 94  | 89  | 49  |
| 58  | 76  | 68  | 110 | 94  | 87  | 161 | 164 | 179 | 99  |
| 67  | 70  | 75  | 82  | 109 | 86  | 115 | 94  | 125 | 104 |
| 14  | 11  | 14  | 7   | 9   | 14  | 5   | 5   | 3   | 10  |
| 52  | 51  | 70  | 131 | 176 | 162 | 156 | 130 | 148 | 117 |
| 55  | 45  | 59  | 131 | 179 | 146 | 169 | 145 | 168 | 69  |
| 49  | 41  | 52  | 87  | 102 | 96  | 97  | 96  | 112 | 72  |
| 54  | 51  | 59  | 118 | 190 | 140 | 158 | 179 | 175 | 70  |
| 16  | 19  | 19  | 30  | 45  | 39  | 26  | 33  | 25  | 15  |
| 27  | 23  | 41  | 57  | 73  | 71  | 55  | 57  | 60  | 33  |
| 64  | 57  | 68  | 62  | 77  | 47  | 65  | 53  | 59  | 51  |
| 24  | 20  | 30  | 32  | 31  | 39  | 37  | 28  | 30  | 24  |
| 26  | 24  | 30  | 52  | 43  | 45  | 53  | 48  | 46  | 33  |
| 37  | 50  | 36  | 53  | 66  | 50  | 72  | 59  | 69  | 47  |
| 43  | 37  | 48  | 42  | 59  | 60  | 57  | 48  | 54  | 22  |

|     |     |     |     |     |     |     |     |     |     |
|-----|-----|-----|-----|-----|-----|-----|-----|-----|-----|
| 29  | 26  | 36  | 46  | 62  | 45  | 47  | 37  | 52  | 39  |
| 30  | 22  | 29  | 28  | 32  | 23  | 36  | 17  | 26  | 15  |
| 38  | 50  | 29  | 36  | 59  | 46  | 35  | 32  | 47  | 20  |
| 10  | 11  | 10  | 13  | 7   | 11  | 3   | 10  | 11  | 9   |
| 119 | 116 | 97  | 88  | 113 | 98  | 144 | 120 | 135 | 63  |
| 7   | 13  | 15  | 9   | 12  | 5   | 7   | 12  | 10  | 11  |
| 80  | 50  | 63  | 42  | 52  | 56  | 50  | 45  | 35  | 40  |
| 23  | 29  | 31  | 32  | 22  | 18  | 11  | 14  | 9   | 28  |
| 16  | 17  | 20  | 21  | 16  | 22  | 19  | 11  | 11  | 13  |
| 13  | 20  | 19  | 20  | 33  | 16  | 23  | 23  | 25  | 18  |
| 69  | 74  | 85  | 75  | 87  | 90  | 76  | 60  | 56  | 54  |
| 44  | 49  | 41  | 62  | 71  | 82  | 80  | 74  | 74  | 56  |
| 26  | 19  | 19  | 47  | 84  | 48  | 54  | 41  | 57  | 26  |
| 65  | 61  | 77  | 38  | 53  | 48  | 67  | 56  | 63  | 68  |
| 30  | 26  | 24  | 31  | 38  | 23  | 15  | 19  | 17  | 20  |
| 35  | 44  | 32  | 65  | 79  | 65  | 62  | 54  | 77  | 36  |
| 54  | 56  | 54  | 30  | 29  | 30  | 40  | 27  | 42  | 44  |
| 65  | 53  | 69  | 86  | 112 | 84  | 117 | 87  | 119 | 84  |
| 82  | 84  | 68  | 57  | 68  | 67  | 84  | 64  | 74  | 67  |
| 58  | 53  | 59  | 47  | 54  | 42  | 55  | 56  | 55  | 43  |
| 69  | 57  | 65  | 55  | 90  | 82  | 79  | 66  | 89  | 53  |
| 39  | 53  | 38  | 25  | 26  | 32  | 31  | 30  | 34  | 28  |
| 49  | 48  | 64  | 53  | 84  | 54  | 65  | 57  | 51  | 59  |
| 46  | 52  | 36  | 27  | 41  | 47  | 39  | 31  | 29  | 34  |
| 49  | 38  | 52  | 140 | 198 | 161 | 111 | 95  | 111 | 55  |
| 38  | 25  | 34  | 75  | 112 | 88  | 127 | 81  | 121 | 58  |
| 58  | 63  | 53  | 63  | 84  | 66  | 60  | 55  | 68  | 35  |
| 16  | 14  | 27  | 11  | 12  | 15  | 11  | 8   | 6   | 14  |
| 60  | 57  | 56  | 65  | 83  | 98  | 85  | 56  | 71  | 41  |
| 107 | 89  | 114 | 82  | 117 | 92  | 121 | 126 | 127 | 90  |
| 83  | 68  | 99  | 86  | 117 | 97  | 97  | 81  | 95  | 61  |
| 42  | 18  | 37  | 40  | 56  | 22  | 25  | 16  | 28  | 27  |
| 50  | 46  | 35  | 65  | 91  | 84  | 81  | 74  | 74  | 40  |
| 39  | 39  | 44  | 47  | 56  | 51  | 40  | 31  | 59  | 34  |
| 45  | 55  | 42  | 44  | 83  | 47  | 49  | 47  | 47  | 45  |
| 116 | 112 | 111 | 115 | 153 | 143 | 92  | 119 | 109 | 103 |
| 27  | 28  | 39  | 23  | 36  | 37  | 45  | 35  | 40  | 43  |
| 147 | 139 | 169 | 104 | 113 | 110 | 175 | 164 | 172 | 168 |
| 51  | 49  | 63  | 70  | 81  | 70  | 62  | 67  | 69  | 39  |
| 46  | 60  | 57  | 121 | 119 | 126 | 93  | 77  | 88  | 72  |
| 59  | 55  | 50  | 33  | 39  | 36  | 37  | 35  | 32  | 44  |

|     |     |     |     |     |     |     |     |     |     |
|-----|-----|-----|-----|-----|-----|-----|-----|-----|-----|
| 75  | 77  | 80  | 38  | 65  | 62  | 64  | 46  | 70  | 49  |
| 70  | 72  | 91  | 102 | 112 | 86  | 88  | 85  | 110 | 75  |
| 51  | 53  | 51  | 51  | 68  | 58  | 65  | 48  | 64  | 43  |
| 85  | 75  | 63  | 80  | 94  | 78  | 113 | 118 | 120 | 65  |
| 44  | 30  | 40  | 49  | 66  | 63  | 66  | 57  | 70  | 36  |
| 92  | 79  | 77  | 132 | 240 | 211 | 173 | 171 | 205 | 96  |
| 44  | 61  | 30  | 77  | 85  | 80  | 87  | 80  | 85  | 49  |
| 30  | 37  | 31  | 44  | 76  | 65  | 84  | 70  | 68  | 44  |
| 26  | 27  | 35  | 43  | 59  | 47  | 23  | 12  | 14  | 29  |
| 28  | 34  | 28  | 49  | 69  | 69  | 69  | 61  | 72  | 40  |
| 33  | 34  | 34  | 52  | 42  | 42  | 49  | 37  | 44  | 40  |
| 46  | 51  | 43  | 57  | 78  | 74  | 54  | 54  | 51  | 44  |
| 31  | 33  | 24  | 54  | 51  | 69  | 61  | 50  | 53  | 41  |
| 19  | 18  | 23  | 18  | 24  | 20  | 15  | 13  | 17  | 16  |
| 4   | 4   | 4   | 2   | 2   | 1   | 1   | 1   | 1   | 2   |
| 22  | 15  | 32  | 18  | 26  | 18  | 12  | 13  | 17  | 17  |
| 33  | 25  | 44  | 43  | 60  | 53  | 27  | 26  | 54  | 22  |
| 28  | 48  | 33  | 29  | 30  | 39  | 35  | 39  | 20  | 30  |
| 67  | 63  | 69  | 99  | 88  | 89  | 83  | 83  | 64  | 45  |
| 63  | 72  | 73  | 81  | 92  | 90  | 60  | 63  | 68  | 52  |
| 39  | 41  | 50  | 33  | 31  | 32  | 29  | 34  | 43  | 38  |
| 39  | 60  | 56  | 55  | 69  | 71  | 50  | 50  | 51  | 37  |
| 27  | 29  | 34  | 42  | 53  | 45  | 71  | 69  | 67  | 33  |
| 34  | 33  | 38  | 72  | 92  | 89  | 100 | 82  | 132 | 49  |
| 28  | 27  | 32  | 67  | 89  | 69  | 88  | 94  | 84  | 59  |
| 44  | 48  | 36  | 79  | 123 | 104 | 99  | 79  | 104 | 49  |
| 39  | 46  | 38  | 76  | 95  | 91  | 82  | 58  | 58  | 53  |
| 57  | 43  | 49  | 94  | 97  | 100 | 86  | 82  | 98  | 60  |
| 13  | 15  | 12  | 8   | 24  | 16  | 26  | 21  | 23  | 17  |
| 54  | 33  | 42  | 44  | 51  | 48  | 53  | 46  | 43  | 53  |
| 36  | 25  | 25  | 51  | 46  | 45  | 53  | 40  | 44  | 32  |
| 40  | 37  | 41  | 22  | 36  | 21  | 39  | 27  | 42  | 42  |
| 63  | 60  | 48  | 59  | 80  | 71  | 73  | 76  | 71  | 46  |
| 46  | 50  | 43  | 34  | 62  | 46  | 47  | 35  | 50  | 40  |
| 29  | 35  | 40  | 41  | 48  | 41  | 45  | 34  | 44  | 27  |
| 184 | 192 | 222 | 129 | 163 | 131 | 250 | 225 | 239 | 216 |
| 55  | 65  | 67  | 47  | 86  | 58  | 39  | 50  | 58  | 44  |
| 67  | 65  | 92  | 93  | 102 | 109 | 127 | 114 | 118 | 94  |
| 31  | 28  | 34  | 60  | 73  | 60  | 53  | 50  | 47  | 38  |
| 56  | 82  | 73  | 94  | 120 | 100 | 116 | 81  | 100 | 50  |
| 77  | 87  | 80  | 93  | 119 | 101 | 105 | 77  | 102 | 79  |

|     |     |     |     |     |     |     |     |     |     |
|-----|-----|-----|-----|-----|-----|-----|-----|-----|-----|
| 77  | 113 | 85  | 58  | 86  | 68  | 77  | 68  | 72  | 59  |
| 68  | 77  | 87  | 54  | 64  | 55  | 62  | 65  | 57  | 67  |
| 125 | 129 | 121 | 139 | 157 | 171 | 163 | 134 | 171 | 110 |
| 121 | 138 | 123 | 86  | 98  | 105 | 96  | 76  | 115 | 94  |
| 79  | 61  | 95  | 62  | 91  | 65  | 77  | 79  | 68  | 69  |
| 89  | 89  | 110 | 169 | 202 | 208 | 232 | 171 | 211 | 121 |
| 53  | 44  | 52  | 49  | 53  | 41  | 51  | 46  | 56  | 49  |
| 89  | 88  | 76  | 89  | 128 | 108 | 103 | 76  | 95  | 75  |
| 28  | 26  | 38  | 26  | 42  | 26  | 34  | 34  | 40  | 36  |
| 63  | 65  | 58  | 45  | 48  | 53  | 54  | 38  | 55  | 72  |
| 44  | 41  | 48  | 47  | 70  | 52  | 52  | 54  | 65  | 40  |
| 56  | 57  | 62  | 76  | 84  | 80  | 89  | 74  | 76  | 61  |
| 38  | 45  | 52  | 104 | 131 | 126 | 147 | 131 | 200 | 80  |
| 13  | 14  | 13  | 7   | 15  | 6   | 14  | 10  | 12  | 14  |
| 17  | 15  | 11  | 13  | 14  | 15  | 28  | 12  | 34  | 22  |
| 42  | 38  | 50  | 43  | 39  | 54  | 61  | 63  | 62  | 30  |
| 64  | 53  | 70  | 35  | 46  | 54  | 75  | 60  | 79  | 57  |
| 52  | 58  | 63  | 34  | 31  | 35  | 48  | 39  | 44  | 48  |
| 131 | 125 | 167 | 114 | 124 | 86  | 122 | 123 | 115 | 124 |
| 45  | 61  | 54  | 29  | 56  | 44  | 74  | 57  | 89  | 55  |
| 50  | 38  | 36  | 24  | 42  | 21  | 50  | 27  | 38  | 25  |
| 21  | 24  | 28  | 21  | 22  | 24  | 41  | 36  | 35  | 33  |
| 74  | 74  | 92  | 103 | 132 | 113 | 197 | 155 | 175 | 103 |
| 50  | 48  | 54  | 83  | 130 | 82  | 137 | 116 | 115 | 75  |
| 28  | 28  | 35  | 25  | 40  | 21  | 22  | 30  | 34  | 32  |
| 45  | 33  | 48  | 41  | 65  | 57  | 70  | 63  | 50  | 34  |
| 77  | 70  | 63  | 48  | 71  | 54  | 72  | 75  | 69  | 73  |
| 49  | 30  | 54  | 27  | 41  | 36  | 51  | 55  | 52  | 45  |
| 76  | 76  | 89  | 71  | 92  | 86  | 143 | 119 | 113 | 86  |
| 35  | 33  | 30  | 73  | 108 | 88  | 84  | 72  | 88  | 33  |
| 84  | 89  | 91  | 132 | 178 | 160 | 156 | 159 | 152 | 96  |
| 41  | 34  | 39  | 76  | 84  | 84  | 73  | 67  | 64  | 45  |
| 48  | 53  | 65  | 123 | 142 | 109 | 170 | 147 | 161 | 87  |
| 23  | 30  | 40  | 34  | 52  | 48  | 40  | 31  | 49  | 37  |
| 46  | 56  | 60  | 124 | 166 | 112 | 204 | 182 | 224 | 110 |
| 34  | 27  | 33  | 25  | 39  | 27  | 44  | 48  | 61  | 43  |
| 109 | 123 | 140 | 167 | 245 | 172 | 355 | 413 | 410 | 173 |
| 42  | 44  | 48  | 142 | 217 | 174 | 232 | 232 | 247 | 117 |
| 27  | 37  | 29  | 85  | 85  | 86  | 84  | 81  | 90  | 51  |
| 18  | 24  | 25  | 45  | 52  | 24  | 32  | 31  | 36  | 14  |
| 10  | 9   | 12  | 11  | 17  | 14  | 21  | 20  | 17  | 16  |

|    |     |     |     |     |     |     |     |     |     |
|----|-----|-----|-----|-----|-----|-----|-----|-----|-----|
| 41 | 60  | 45  | 157 | 193 | 112 | 157 | 147 | 172 | 53  |
| 32 | 29  | 30  | 94  | 101 | 76  | 80  | 72  | 64  | 31  |
| 34 | 35  | 51  | 86  | 108 | 64  | 86  | 51  | 74  | 44  |
| 25 | 29  | 37  | 73  | 85  | 55  | 64  | 54  | 66  | 30  |
| 54 | 44  | 47  | 51  | 56  | 67  | 71  | 63  | 64  | 50  |
| 87 | 93  | 87  | 151 | 172 | 123 | 182 | 195 | 188 | 102 |
| 61 | 72  | 77  | 57  | 76  | 88  | 86  | 80  | 107 | 58  |
| 97 | 100 | 89  | 70  | 81  | 77  | 77  | 72  | 62  | 46  |
| 35 | 30  | 40  | 79  | 101 | 79  | 99  | 94  | 94  | 48  |
| 60 | 54  | 57  | 73  | 100 | 82  | 138 | 103 | 117 | 74  |
| 79 | 59  | 80  | 87  | 111 | 81  | 152 | 143 | 117 | 94  |
| 86 | 84  | 99  | 81  | 109 | 120 | 103 | 127 | 89  | 76  |
| 73 | 72  | 57  | 56  | 72  | 60  | 72  | 81  | 100 | 52  |
| 55 | 58  | 66  | 63  | 69  | 70  | 59  | 69  | 58  | 60  |
| 84 | 58  | 85  | 51  | 80  | 78  | 105 | 84  | 94  | 60  |
| 41 | 48  | 48  | 58  | 81  | 75  | 68  | 60  | 69  | 52  |
| 42 | 33  | 30  | 27  | 50  | 35  | 49  | 35  | 37  | 34  |
| 56 | 54  | 56  | 67  | 92  | 67  | 142 | 115 | 154 | 63  |
| 87 | 73  | 80  | 99  | 135 | 124 | 91  | 99  | 92  | 80  |
| 84 | 69  | 92  | 72  | 102 | 77  | 114 | 129 | 128 | 85  |
| 72 | 51  | 70  | 95  | 93  | 89  | 102 | 67  | 74  | 63  |
| 31 | 29  | 48  | 23  | 30  | 27  | 36  | 34  | 27  | 37  |
| 30 | 23  | 15  | 20  | 25  | 20  | 30  | 20  | 27  | 28  |
| 60 | 47  | 81  | 46  | 48  | 43  | 47  | 44  | 60  | 60  |
| 17 | 13  | 21  | 20  | 13  | 21  | 19  | 24  | 22  | 21  |
| 25 | 32  | 34  | 27  | 30  | 34  | 33  | 40  | 29  | 26  |
| 39 | 41  | 36  | 65  | 97  | 84  | 118 | 123 | 116 | 58  |
| 14 | 21  | 27  | 38  | 51  | 35  | 39  | 35  | 24  | 28  |
| 38 | 34  | 39  | 207 | 295 | 200 | 204 | 181 | 206 | 92  |
| 55 | 49  | 55  | 56  | 41  | 64  | 48  | 42  | 50  | 45  |
| 95 | 91  | 127 | 35  | 60  | 61  | 84  | 91  | 89  | 69  |
| 59 | 64  | 47  | 84  | 69  | 83  | 52  | 51  | 45  | 39  |
| 54 | 44  | 49  | 45  | 62  | 52  | 54  | 48  | 37  | 42  |
| 65 | 73  | 81  | 103 | 112 | 111 | 142 | 109 | 126 | 99  |
| 44 | 44  | 36  | 59  | 92  | 62  | 75  | 58  | 78  | 45  |
| 58 | 41  | 41  | 76  | 122 | 114 | 80  | 70  | 72  | 58  |
| 49 | 52  | 58  | 104 | 121 | 103 | 114 | 99  | 114 | 59  |
| 49 | 38  | 46  | 48  | 77  | 73  | 66  | 67  | 53  | 47  |
| 5  | 10  | 12  | 16  | 18  | 14  | 20  | 13  | 24  | 15  |
| 67 | 45  | 38  | 62  | 73  | 68  | 80  | 53  | 75  | 48  |
| 72 | 55  | 67  | 137 | 151 | 151 | 180 | 155 | 175 | 91  |

|     |     |     |     |     |     |     |     |     |    |
|-----|-----|-----|-----|-----|-----|-----|-----|-----|----|
| 54  | 57  | 59  | 106 | 99  | 99  | 101 | 108 | 83  | 85 |
| 75  | 51  | 70  | 71  | 101 | 99  | 111 | 84  | 83  | 63 |
| 50  | 45  | 55  | 100 | 143 | 95  | 185 | 155 | 170 | 88 |
| 18  | 31  | 19  | 18  | 30  | 20  | 17  | 20  | 16  | 20 |
| 40  | 37  | 47  | 48  | 63  | 52  | 64  | 53  | 50  | 34 |
| 32  | 20  | 21  | 23  | 45  | 29  | 22  | 16  | 22  | 17 |
| 44  | 46  | 48  | 40  | 43  | 39  | 37  | 44  | 36  | 40 |
| 14  | 19  | 24  | 21  | 32  | 27  | 21  | 27  | 35  | 20 |
| 49  | 38  | 53  | 43  | 63  | 55  | 57  | 42  | 46  | 55 |
| 36  | 35  | 32  | 37  | 86  | 59  | 71  | 73  | 75  | 45 |
| 27  | 37  | 29  | 42  | 35  | 35  | 39  | 36  | 37  | 26 |
| 49  | 51  | 43  | 73  | 117 | 99  | 102 | 89  | 96  | 47 |
| 46  | 53  | 61  | 98  | 105 | 93  | 84  | 77  | 66  | 55 |
| 37  | 36  | 41  | 21  | 30  | 28  | 26  | 18  | 23  | 26 |
| 89  | 81  | 97  | 78  | 140 | 109 | 104 | 108 | 149 | 83 |
| 34  | 41  | 57  | 53  | 59  | 56  | 67  | 58  | 73  | 57 |
| 24  | 19  | 33  | 48  | 58  | 43  | 40  | 32  | 43  | 24 |
| 27  | 19  | 35  | 39  | 56  | 46  | 48  | 53  | 53  | 41 |
| 34  | 43  | 31  | 32  | 34  | 30  | 38  | 40  | 39  | 44 |
| 31  | 24  | 18  | 21  | 20  | 24  | 27  | 21  | 34  | 17 |
| 11  | 15  | 10  | 18  | 32  | 8   | 13  | 19  | 20  | 11 |
| 10  | 6   | 6   | 5   | 3   | 7   | 20  | 9   | 12  | 12 |
| 29  | 20  | 32  | 14  | 28  | 30  | 25  | 16  | 27  | 16 |
| 14  | 26  | 22  | 77  | 110 | 93  | 90  | 88  | 90  | 38 |
| 29  | 23  | 33  | 30  | 33  | 19  | 22  | 16  | 19  | 18 |
| 48  | 51  | 61  | 72  | 97  | 80  | 104 | 81  | 104 | 59 |
| 42  | 48  | 49  | 22  | 44  | 30  | 27  | 29  | 28  | 40 |
| 27  | 40  | 33  | 15  | 23  | 17  | 29  | 19  | 31  | 31 |
| 32  | 25  | 43  | 33  | 38  | 38  | 32  | 25  | 38  | 41 |
| 61  | 54  | 45  | 57  | 67  | 72  | 58  | 44  | 73  | 52 |
| 38  | 37  | 35  | 40  | 39  | 33  | 24  | 22  | 31  | 39 |
| 27  | 28  | 30  | 15  | 14  | 7   | 21  | 13  | 13  | 22 |
| 46  | 72  | 80  | 106 | 130 | 111 | 128 | 137 | 137 | 87 |
| 54  | 54  | 72  | 71  | 63  | 59  | 81  | 66  | 63  | 56 |
| 84  | 91  | 103 | 69  | 102 | 68  | 115 | 95  | 113 | 72 |
| 190 | 180 | 225 | 56  | 74  | 70  | 88  | 84  | 111 | 82 |
| 157 | 173 | 193 | 84  | 106 | 94  | 125 | 119 | 142 | 93 |
| 9   | 10  | 18  | 5   | 10  | 8   | 19  | 15  | 30  | 11 |
| 36  | 45  | 47  | 54  | 53  | 48  | 38  | 33  | 40  | 39 |
| 42  | 32  | 32  | 48  | 77  | 46  | 51  | 62  | 61  | 32 |
| 37  | 29  | 34  | 32  | 37  | 39  | 49  | 32  | 36  | 19 |

|     |     |     |     |     |     |     |     |     |    |
|-----|-----|-----|-----|-----|-----|-----|-----|-----|----|
| 49  | 42  | 55  | 32  | 60  | 30  | 40  | 37  | 39  | 27 |
| 43  | 41  | 44  | 30  | 43  | 36  | 39  | 37  | 33  | 26 |
| 7   | 8   | 9   | 0   | 4   | 6   | 2   | 3   | 2   | 7  |
| 38  | 37  | 31  | 37  | 38  | 30  | 43  | 24  | 27  | 33 |
| 45  | 50  | 57  | 19  | 30  | 31  | 26  | 16  | 18  | 23 |
| 76  | 77  | 86  | 56  | 62  | 68  | 66  | 56  | 73  | 74 |
| 36  | 42  | 62  | 42  | 55  | 49  | 58  | 63  | 74  | 47 |
| 64  | 50  | 43  | 51  | 36  | 57  | 37  | 44  | 56  | 50 |
| 118 | 80  | 100 | 85  | 103 | 88  | 95  | 89  | 89  | 76 |
| 17  | 23  | 19  | 26  | 24  | 31  | 44  | 36  | 38  | 17 |
| 28  | 30  | 42  | 24  | 34  | 38  | 32  | 27  | 37  | 30 |
| 46  | 51  | 56  | 59  | 75  | 63  | 46  | 53  | 62  | 55 |
| 65  | 57  | 62  | 57  | 76  | 82  | 89  | 67  | 69  | 54 |
| 14  | 14  | 18  | 21  | 32  | 38  | 21  | 14  | 23  | 26 |
| 6   | 5   | 5   | 4   | 5   | 2   | 4   | 1   | 0   | 3  |
| 7   | 5   | 2   | 9   | 20  | 9   | 2   | 5   | 4   | 2  |
| 60  | 55  | 41  | 45  | 54  | 49  | 39  | 55  | 53  | 38 |
| 30  | 29  | 30  | 49  | 42  | 53  | 46  | 47  | 37  | 35 |
| 10  | 13  | 12  | 5   | 5   | 3   | 9   | 5   | 12  | 14 |
| 15  | 20  | 20  | 5   | 8   | 12  | 5   | 9   | 11  | 9  |
| 36  | 50  | 40  | 38  | 65  | 50  | 38  | 44  | 48  | 29 |
| 2   | 3   | 5   | 1   | 0   | 0   | 2   | 0   | 2   | 3  |
| 31  | 45  | 41  | 77  | 111 | 53  | 57  | 44  | 66  | 41 |
| 6   | 5   | 8   | 13  | 8   | 6   | 2   | 0   | 4   | 6  |
| 46  | 43  | 35  | 33  | 48  | 39  | 38  | 39  | 39  | 29 |
| 16  | 8   | 20  | 16  | 11  | 14  | 15  | 7   | 9   | 7  |
| 21  | 23  | 13  | 59  | 74  | 40  | 44  | 19  | 32  | 17 |
| 15  | 14  | 16  | 15  | 20  | 16  | 29  | 19  | 23  | 18 |
| 45  | 51  | 47  | 79  | 82  | 66  | 104 | 102 | 101 | 60 |
| 50  | 44  | 58  | 78  | 93  | 99  | 116 | 131 | 106 | 61 |
| 65  | 51  | 75  | 103 | 96  | 100 | 125 | 127 | 131 | 81 |
| 38  | 37  | 36  | 60  | 80  | 68  | 69  | 46  | 61  | 42 |
| 36  | 36  | 41  | 70  | 89  | 84  | 81  | 70  | 73  | 39 |
| 41  | 38  | 38  | 71  | 107 | 86  | 38  | 38  | 52  | 40 |
| 35  | 38  | 31  | 50  | 53  | 64  | 29  | 19  | 35  | 20 |
| 60  | 44  | 60  | 110 | 123 | 103 | 94  | 84  | 92  | 62 |
| 27  | 19  | 34  | 75  | 97  | 69  | 64  | 45  | 52  | 30 |
| 38  | 49  | 55  | 112 | 180 | 116 | 69  | 67  | 77  | 48 |
| 99  | 123 | 116 | 63  | 102 | 86  | 120 | 125 | 130 | 85 |
| 61  | 58  | 67  | 56  | 54  | 47  | 89  | 69  | 75  | 54 |
| 83  | 82  | 92  | 63  | 99  | 71  | 98  | 73  | 62  | 71 |

|     |     |     |     |     |     |     |     |     |     |
|-----|-----|-----|-----|-----|-----|-----|-----|-----|-----|
| 66  | 51  | 61  | 49  | 70  | 53  | 63  | 56  | 65  | 51  |
| 125 | 145 | 138 | 111 | 134 | 112 | 144 | 109 | 128 | 132 |
| 71  | 83  | 76  | 102 | 115 | 105 | 127 | 115 | 125 | 87  |
| 82  | 80  | 82  | 91  | 88  | 100 | 109 | 103 | 114 | 77  |
| 38  | 23  | 32  | 19  | 24  | 19  | 38  | 20  | 22  | 14  |
| 21  | 19  | 27  | 39  | 58  | 34  | 55  | 41  | 49  | 24  |
| 55  | 54  | 59  | 69  | 100 | 72  | 66  | 45  | 56  | 55  |
| 98  | 101 | 97  | 58  | 74  | 60  | 73  | 56  | 57  | 68  |
| 86  | 61  | 77  | 188 | 200 | 162 | 187 | 167 | 159 | 96  |
| 31  | 29  | 47  | 160 | 207 | 156 | 149 | 139 | 121 | 70  |
| 36  | 43  | 40  | 123 | 134 | 90  | 99  | 77  | 78  | 45  |
| 42  | 31  | 36  | 134 | 183 | 142 | 73  | 74  | 76  | 33  |
| 43  | 35  | 40  | 105 | 144 | 103 | 65  | 67  | 58  | 28  |
| 33  | 36  | 41  | 133 | 179 | 121 | 105 | 84  | 87  | 37  |
| 48  | 71  | 60  | 76  | 124 | 108 | 120 | 97  | 119 | 54  |
| 87  | 80  | 90  | 222 | 304 | 237 | 149 | 146 | 186 | 88  |
| 44  | 54  | 50  | 98  | 142 | 139 | 112 | 145 | 112 | 59  |
| 18  | 18  | 40  | 61  | 61  | 61  | 56  | 66  | 85  | 25  |
| 15  | 20  | 18  | 52  | 65  | 62  | 48  | 39  | 40  | 19  |
| 9   | 7   | 8   | 6   | 4   | 12  | 8   | 10  | 8   | 4   |
| 33  | 35  | 46  | 44  | 63  | 45  | 45  | 39  | 48  | 37  |
| 23  | 40  | 41  | 60  | 67  | 46  | 60  | 64  | 69  | 41  |
| 58  | 56  | 61  | 88  | 95  | 89  | 79  | 64  | 57  | 60  |
| 37  | 40  | 44  | 54  | 54  | 61  | 55  | 61  | 60  | 42  |
| 13  | 17  | 19  | 11  | 15  | 22  | 16  | 9   | 16  | 10  |
| 27  | 28  | 22  | 14  | 17  | 11  | 21  | 12  | 12  | 21  |
| 32  | 44  | 42  | 43  | 42  | 33  | 38  | 46  | 42  | 43  |
| 58  | 58  | 73  | 48  | 49  | 53  | 59  | 54  | 72  | 37  |
| 34  | 47  | 66  | 22  | 33  | 30  | 57  | 56  | 40  | 39  |
| 35  | 53  | 58  | 36  | 48  | 37  | 50  | 47  | 53  | 55  |
| 35  | 38  | 33  | 22  | 26  | 24  | 19  | 16  | 15  | 23  |
| 37  | 31  | 60  | 57  | 69  | 76  | 56  | 57  | 58  | 33  |
| 29  | 30  | 50  | 30  | 29  | 36  | 37  | 25  | 32  | 32  |
| 42  | 28  | 61  | 145 | 214 | 183 | 219 | 186 | 204 | 87  |
| 26  | 26  | 31  | 23  | 30  | 28  | 38  | 22  | 34  | 17  |
| 36  | 32  | 35  | 21  | 19  | 24  | 28  | 14  | 27  | 20  |
| 14  | 25  | 17  | 26  | 37  | 30  | 24  | 25  | 31  | 15  |
| 62  | 69  | 59  | 40  | 65  | 58  | 53  | 45  | 68  | 43  |
| 13  | 31  | 33  | 24  | 30  | 25  | 23  | 28  | 25  | 27  |
| 28  | 26  | 36  | 32  | 50  | 41  | 71  | 54  | 54  | 35  |
| 62  | 56  | 67  | 49  | 70  | 56  | 82  | 62  | 75  | 48  |



|    |    |    |     |     |     |     |     |     |    |
|----|----|----|-----|-----|-----|-----|-----|-----|----|
| 20 | 14 | 10 | 32  | 24  | 28  | 22  | 20  | 28  | 21 |
| 43 | 53 | 50 | 45  | 59  | 52  | 62  | 54  | 66  | 57 |
| 67 | 56 | 83 | 77  | 149 | 107 | 77  | 59  | 72  | 62 |
| 17 | 20 | 32 | 43  | 63  | 42  | 31  | 21  | 31  | 25 |
| 13 | 8  | 17 | 16  | 30  | 18  | 13  | 10  | 14  | 8  |
| 39 | 50 | 55 | 59  | 90  | 77  | 70  | 83  | 81  | 42 |
| 36 | 22 | 32 | 43  | 55  | 55  | 38  | 30  | 35  | 31 |
| 63 | 81 | 66 | 151 | 229 | 171 | 153 | 148 | 124 | 78 |
| 71 | 57 | 57 | 71  | 89  | 78  | 104 | 81  | 82  | 60 |
| 42 | 43 | 48 | 44  | 59  | 48  | 43  | 48  | 48  | 38 |
| 22 | 23 | 26 | 31  | 39  | 32  | 56  | 35  | 53  | 21 |
| 15 | 16 | 12 | 36  | 53  | 36  | 43  | 28  | 44  | 20 |
| 54 | 56 | 45 | 58  | 76  | 71  | 79  | 60  | 68  | 58 |
| 52 | 54 | 57 | 60  | 82  | 71  | 69  | 74  | 80  | 54 |
| 42 | 48 | 46 | 80  | 91  | 85  | 79  | 83  | 79  | 54 |
| 11 | 14 | 6  | 46  | 57  | 48  | 31  | 29  | 36  | 15 |
| 41 | 28 | 40 | 54  | 71  | 56  | 61  | 54  | 41  | 30 |
| 53 | 41 | 43 | 52  | 75  | 67  | 92  | 82  | 102 | 44 |
| 29 | 40 | 50 | 54  | 72  | 70  | 56  | 60  | 58  | 50 |
| 32 | 37 | 38 | 148 | 232 | 171 | 120 | 81  | 105 | 43 |
| 39 | 45 | 45 | 57  | 56  | 73  | 66  | 48  | 86  | 50 |
| 65 | 56 | 71 | 75  | 102 | 77  | 93  | 112 | 122 | 73 |
| 20 | 28 | 25 | 26  | 21  | 19  | 33  | 36  | 46  | 26 |
| 65 | 82 | 64 | 41  | 60  | 49  | 80  | 82  | 83  | 74 |
| 27 | 21 | 23 | 42  | 63  | 56  | 87  | 56  | 57  | 34 |
| 43 | 50 | 68 | 41  | 63  | 56  | 39  | 52  | 51  | 59 |
| 18 | 30 | 22 | 43  | 57  | 45  | 35  | 38  | 41  | 21 |
| 58 | 41 | 39 | 67  | 91  | 95  | 88  | 81  | 97  | 58 |
| 22 | 37 | 27 | 59  | 88  | 61  | 86  | 74  | 106 | 42 |
| 42 | 43 | 55 | 48  | 53  | 50  | 45  | 34  | 39  | 49 |
| 39 | 44 | 44 | 72  | 76  | 83  | 80  | 75  | 90  | 47 |
| 31 | 22 | 30 | 4   | 7   | 9   | 12  | 9   | 6   | 13 |
| 20 | 24 | 27 | 20  | 29  | 29  | 22  | 33  | 32  | 40 |
| 39 | 33 | 40 | 8   | 18  | 10  | 11  | 6   | 12  | 25 |
| 16 | 19 | 28 | 18  | 20  | 20  | 16  | 23  | 21  | 29 |
| 70 | 67 | 77 | 61  | 59  | 41  | 39  | 48  | 52  | 59 |
| 29 | 27 | 40 | 11  | 16  | 11  | 12  | 17  | 18  | 25 |
| 33 | 30 | 27 | 43  | 50  | 44  | 34  | 24  | 34  | 22 |
| 58 | 57 | 62 | 54  | 74  | 86  | 84  | 63  | 72  | 51 |
| 67 | 56 | 39 | 16  | 30  | 23  | 34  | 27  | 33  | 39 |
| 63 | 48 | 78 | 84  | 93  | 90  | 84  | 86  | 70  | 73 |

|     |     |     |     |     |     |     |     |     |     |
|-----|-----|-----|-----|-----|-----|-----|-----|-----|-----|
| 53  | 69  | 72  | 63  | 69  | 59  | 51  | 54  | 54  | 46  |
| 112 | 113 | 134 | 81  | 103 | 115 | 102 | 83  | 108 | 63  |
| 60  | 53  | 55  | 80  | 90  | 124 | 75  | 67  | 93  | 64  |
| 35  | 29  | 35  | 47  | 63  | 62  | 34  | 40  | 42  | 36  |
| 87  | 82  | 92  | 66  | 74  | 58  | 62  | 66  | 67  | 57  |
| 59  | 72  | 76  | 81  | 106 | 78  | 112 | 91  | 108 | 88  |
| 22  | 40  | 44  | 54  | 50  | 53  | 65  | 39  | 67  | 34  |
| 39  | 35  | 52  | 73  | 99  | 85  | 65  | 68  | 91  | 40  |
| 34  | 37  | 37  | 108 | 144 | 125 | 85  | 84  | 85  | 36  |
| 15  | 22  | 28  | 27  | 33  | 34  | 31  | 25  | 25  | 23  |
| 36  | 31  | 36  | 29  | 33  | 18  | 30  | 23  | 36  | 22  |
| 28  | 30  | 39  | 23  | 32  | 32  | 25  | 20  | 28  | 28  |
| 28  | 32  | 31  | 46  | 43  | 50  | 36  | 34  | 37  | 18  |
| 43  | 43  | 46  | 70  | 92  | 88  | 75  | 102 | 90  | 46  |
| 24  | 28  | 28  | 62  | 77  | 57  | 50  | 32  | 45  | 25  |
| 23  | 31  | 30  | 39  | 45  | 48  | 52  | 51  | 49  | 30  |
| 25  | 34  | 39  | 39  | 40  | 21  | 20  | 20  | 18  | 24  |
| 19  | 29  | 25  | 24  | 42  | 29  | 20  | 15  | 7   | 16  |
| 43  | 42  | 57  | 98  | 154 | 89  | 99  | 73  | 83  | 57  |
| 71  | 78  | 71  | 82  | 98  | 105 | 64  | 60  | 65  | 58  |
| 76  | 52  | 60  | 55  | 72  | 46  | 53  | 54  | 50  | 47  |
| 68  | 83  | 93  | 70  | 94  | 79  | 80  | 71  | 74  | 54  |
| 23  | 18  | 32  | 55  | 68  | 52  | 26  | 26  | 31  | 31  |
| 57  | 60  | 64  | 61  | 98  | 75  | 47  | 47  | 74  | 53  |
| 55  | 64  | 56  | 100 | 119 | 110 | 76  | 79  | 91  | 73  |
| 20  | 25  | 28  | 14  | 28  | 13  | 19  | 18  | 27  | 19  |
| 47  | 39  | 57  | 40  | 52  | 51  | 42  | 47  | 60  | 44  |
| 28  | 26  | 26  | 44  | 69  | 61  | 74  | 60  | 88  | 32  |
| 67  | 58  | 53  | 75  | 95  | 113 | 92  | 88  | 86  | 47  |
| 53  | 62  | 63  | 89  | 100 | 98  | 179 | 157 | 175 | 55  |
| 30  | 30  | 37  | 37  | 47  | 29  | 40  | 44  | 26  | 32  |
| 29  | 50  | 32  | 29  | 24  | 40  | 33  | 30  | 34  | 34  |
| 41  | 40  | 42  | 37  | 52  | 38  | 67  | 77  | 71  | 62  |
| 47  | 62  | 48  | 92  | 113 | 120 | 111 | 112 | 109 | 56  |
| 25  | 34  | 30  | 44  | 53  | 40  | 44  | 42  | 47  | 34  |
| 29  | 29  | 31  | 54  | 71  | 70  | 63  | 57  | 61  | 42  |
| 49  | 58  | 50  | 194 | 227 | 215 | 180 | 149 | 177 | 86  |
| 33  | 42  | 42  | 180 | 247 | 175 | 237 | 191 | 244 | 104 |
| 56  | 62  | 46  | 189 | 229 | 224 | 207 | 158 | 170 | 75  |
| 43  | 46  | 49  | 78  | 93  | 68  | 92  | 77  | 84  | 50  |
| 61  | 57  | 69  | 183 | 270 | 263 | 234 | 229 | 294 | 129 |

|     |    |    |     |     |     |     |     |     |    |
|-----|----|----|-----|-----|-----|-----|-----|-----|----|
| 19  | 25 | 20 | 56  | 81  | 73  | 50  | 68  | 55  | 38 |
| 45  | 41 | 31 | 52  | 57  | 74  | 73  | 60  | 79  | 49 |
| 42  | 27 | 41 | 52  | 79  | 72  | 57  | 56  | 61  | 38 |
| 56  | 56 | 45 | 120 | 145 | 128 | 110 | 98  | 99  | 72 |
| 44  | 23 | 48 | 76  | 88  | 58  | 69  | 61  | 70  | 45 |
| 50  | 54 | 51 | 96  | 133 | 111 | 116 | 117 | 120 | 63 |
| 35  | 45 | 59 | 54  | 80  | 62  | 56  | 43  | 54  | 29 |
| 28  | 28 | 25 | 37  | 35  | 30  | 42  | 42  | 44  | 21 |
| 30  | 37 | 34 | 40  | 56  | 54  | 49  | 41  | 55  | 37 |
| 45  | 32 | 55 | 25  | 26  | 23  | 27  | 32  | 34  | 38 |
| 55  | 59 | 51 | 40  | 41  | 34  | 49  | 43  | 43  | 47 |
| 30  | 30 | 27 | 6   | 5   | 6   | 10  | 13  | 15  | 20 |
| 36  | 53 | 58 | 51  | 68  | 57  | 46  | 39  | 42  | 48 |
| 25  | 25 | 36 | 15  | 10  | 18  | 9   | 13  | 12  | 30 |
| 46  | 43 | 61 | 31  | 42  | 35  | 39  | 24  | 31  | 47 |
| 73  | 71 | 80 | 70  | 77  | 60  | 63  | 80  | 80  | 66 |
| 31  | 24 | 23 | 32  | 29  | 30  | 35  | 40  | 35  | 22 |
| 15  | 29 | 46 | 47  | 68  | 69  | 62  | 48  | 60  | 50 |
| 11  | 7  | 6  | 1   | 4   | 2   | 9   | 2   | 4   | 8  |
| 20  | 24 | 27 | 53  | 61  | 39  | 52  | 43  | 43  | 31 |
| 21  | 36 | 27 | 38  | 53  | 39  | 35  | 29  | 31  | 21 |
| 40  | 35 | 44 | 97  | 124 | 133 | 113 | 99  | 104 | 51 |
| 27  | 25 | 31 | 59  | 80  | 82  | 91  | 82  | 100 | 45 |
| 51  | 45 | 39 | 109 | 138 | 141 | 153 | 149 | 185 | 71 |
| 108 | 70 | 97 | 93  | 100 | 99  | 112 | 87  | 90  | 75 |
| 41  | 45 | 34 | 45  | 42  | 35  | 30  | 44  | 42  | 40 |
| 35  | 31 | 36 | 27  | 27  | 25  | 24  | 20  | 22  | 29 |
| 56  | 59 | 56 | 38  | 62  | 56  | 62  | 52  | 46  | 46 |
| 31  | 38 | 32 | 22  | 34  | 31  | 24  | 23  | 27  | 36 |
| 63  | 56 | 76 | 48  | 61  | 60  | 58  | 54  | 49  | 55 |
| 63  | 70 | 65 | 84  | 114 | 98  | 110 | 131 | 89  | 71 |
| 57  | 64 | 56 | 51  | 43  | 45  | 45  | 41  | 42  | 55 |
| 47  | 55 | 47 | 32  | 46  | 50  | 45  | 41  | 44  | 33 |
| 39  | 52 | 46 | 55  | 118 | 66  | 74  | 70  | 69  | 39 |
| 28  | 28 | 31 | 30  | 38  | 34  | 30  | 27  | 30  | 27 |
| 35  | 33 | 45 | 58  | 62  | 53  | 45  | 39  | 42  | 37 |
| 65  | 60 | 81 | 114 | 134 | 110 | 134 | 106 | 106 | 75 |
| 91  | 64 | 88 | 90  | 85  | 96  | 99  | 82  | 94  | 66 |
| 52  | 42 | 60 | 86  | 109 | 83  | 89  | 71  | 101 | 53 |
| 32  | 34 | 42 | 44  | 55  | 43  | 40  | 34  | 30  | 29 |
| 38  | 43 | 46 | 121 | 151 | 141 | 108 | 73  | 104 | 50 |

|    |    |    |     |     |     |     |     |     |     |
|----|----|----|-----|-----|-----|-----|-----|-----|-----|
| 40 | 48 | 40 | 50  | 47  | 44  | 35  | 27  | 55  | 24  |
| 23 | 18 | 14 | 24  | 13  | 22  | 13  | 10  | 13  | 16  |
| 62 | 66 | 70 | 36  | 62  | 50  | 54  | 31  | 41  | 47  |
| 27 | 24 | 42 | 54  | 53  | 35  | 29  | 31  | 39  | 25  |
| 33 | 14 | 26 | 18  | 18  | 13  | 20  | 6   | 21  | 12  |
| 29 | 19 | 25 | 31  | 26  | 20  | 19  | 16  | 19  | 22  |
| 43 | 43 | 58 | 31  | 30  | 30  | 34  | 29  | 37  | 28  |
| 41 | 64 | 64 | 58  | 58  | 60  | 41  | 35  | 46  | 41  |
| 37 | 48 | 56 | 66  | 91  | 72  | 69  | 68  | 66  | 44  |
| 63 | 95 | 81 | 128 | 152 | 185 | 120 | 142 | 123 | 103 |
| 47 | 59 | 54 | 78  | 91  | 89  | 67  | 50  | 59  | 41  |
| 34 | 51 | 46 | 78  | 103 | 100 | 57  | 43  | 53  | 43  |
| 33 | 32 | 35 | 30  | 45  | 45  | 32  | 28  | 26  | 27  |
| 72 | 85 | 85 | 121 | 206 | 182 | 107 | 100 | 97  | 76  |
| 41 | 44 | 53 | 76  | 130 | 106 | 72  | 69  | 67  | 51  |
| 50 | 50 | 56 | 104 | 151 | 126 | 115 | 148 | 116 | 76  |
| 40 | 33 | 27 | 32  | 51  | 44  | 30  | 19  | 23  | 18  |
| 51 | 49 | 61 | 42  | 53  | 40  | 51  | 49  | 39  | 39  |
| 30 | 24 | 31 | 44  | 42  | 46  | 51  | 59  | 51  | 32  |
| 27 | 23 | 29 | 28  | 28  | 42  | 22  | 19  | 24  | 15  |
| 82 | 63 | 68 | 50  | 75  | 72  | 51  | 59  | 66  | 60  |
| 73 | 58 | 82 | 55  | 61  | 68  | 43  | 52  | 49  | 63  |
| 20 | 29 | 38 | 32  | 31  | 29  | 40  | 28  | 35  | 24  |
| 1  | 1  | 5  | 1   | 4   | 0   | 3   | 0   | 3   | 3   |
| 38 | 36 | 42 | 36  | 47  | 52  | 40  | 36  | 44  | 47  |
| 42 | 40 | 53 | 48  | 56  | 60  | 45  | 55  | 48  | 47  |
| 53 | 41 | 56 | 30  | 32  | 32  | 47  | 50  | 47  | 38  |
| 3  | 3  | 9  | 3   | 4   | 4   | 5   | 9   | 6   | 6   |
| 60 | 47 | 51 | 132 | 176 | 143 | 128 | 124 | 126 | 67  |
| 13 | 9  | 15 | 32  | 49  | 42  | 35  | 23  | 26  | 10  |
| 54 | 63 | 74 | 176 | 241 | 214 | 162 | 132 | 129 | 74  |
| 24 | 30 | 29 | 83  | 106 | 92  | 62  | 44  | 52  | 33  |
| 1  | 2  | 2  | 26  | 29  | 15  | 1   | 9   | 8   | 4   |
| 53 | 65 | 52 | 117 | 156 | 142 | 127 | 88  | 106 | 66  |
| 12 | 9  | 15 | 24  | 33  | 28  | 9   | 5   | 10  | 5   |
| 13 | 15 | 20 | 70  | 87  | 54  | 50  | 41  | 36  | 20  |
| 33 | 36 | 41 | 135 | 184 | 174 | 122 | 106 | 140 | 72  |
| 23 | 23 | 15 | 86  | 126 | 90  | 52  | 37  | 42  | 21  |
| 24 | 32 | 14 | 38  | 59  | 55  | 40  | 33  | 49  | 19  |
| 28 | 24 | 32 | 53  | 56  | 46  | 36  | 22  | 39  | 28  |
| 33 | 24 | 33 | 42  | 43  | 59  | 44  | 34  | 36  | 31  |

|     |     |     |     |     |     |     |     |     |    |
|-----|-----|-----|-----|-----|-----|-----|-----|-----|----|
| 35  | 33  | 32  | 20  | 39  | 26  | 19  | 24  | 33  | 26 |
| 22  | 28  | 20  | 13  | 15  | 18  | 11  | 11  | 14  | 16 |
| 17  | 23  | 19  | 22  | 21  | 17  | 13  | 10  | 13  | 9  |
| 40  | 33  | 51  | 54  | 72  | 51  | 63  | 46  | 53  | 19 |
| 7   | 5   | 9   | 5   | 10  | 6   | 9   | 6   | 13  | 4  |
| 35  | 35  | 57  | 29  | 36  | 21  | 37  | 20  | 30  | 21 |
| 27  | 22  | 30  | 14  | 24  | 27  | 26  | 20  | 23  | 25 |
| 14  | 13  | 16  | 18  | 17  | 18  | 15  | 6   | 15  | 12 |
| 28  | 20  | 27  | 58  | 89  | 59  | 79  | 53  | 61  | 37 |
| 29  | 41  | 33  | 50  | 60  | 36  | 56  | 41  | 46  | 40 |
| 30  | 36  | 40  | 43  | 44  | 53  | 47  | 49  | 42  | 25 |
| 50  | 60  | 39  | 70  | 82  | 91  | 76  | 76  | 77  | 61 |
| 42  | 50  | 52  | 33  | 57  | 63  | 57  | 42  | 49  | 44 |
| 77  | 82  | 91  | 58  | 53  | 76  | 83  | 75  | 91  | 64 |
| 58  | 48  | 43  | 60  | 78  | 84  | 67  | 60  | 61  | 51 |
| 43  | 29  | 33  | 60  | 64  | 56  | 63  | 43  | 51  | 43 |
| 48  | 58  | 50  | 61  | 71  | 61  | 70  | 59  | 63  | 53 |
| 120 | 104 | 119 | 69  | 79  | 69  | 56  | 53  | 51  | 40 |
| 75  | 62  | 66  | 59  | 89  | 61  | 87  | 65  | 78  | 54 |
| 36  | 37  | 39  | 34  | 31  | 30  | 37  | 50  | 50  | 34 |
| 41  | 38  | 52  | 65  | 98  | 92  | 57  | 54  | 57  | 47 |
| 45  | 35  | 35  | 54  | 69  | 68  | 40  | 32  | 45  | 31 |
| 31  | 38  | 52  | 68  | 103 | 97  | 84  | 72  | 87  | 53 |
| 20  | 32  | 33  | 52  | 44  | 29  | 21  | 27  | 34  | 31 |
| 22  | 26  | 40  | 40  | 47  | 31  | 25  | 38  | 27  | 31 |
| 46  | 42  | 50  | 79  | 81  | 59  | 63  | 65  | 69  | 52 |
| 27  | 38  | 32  | 49  | 73  | 64  | 42  | 44  | 35  | 26 |
| 94  | 76  | 65  | 82  | 104 | 75  | 64  | 64  | 80  | 58 |
| 20  | 25  | 23  | 25  | 25  | 27  | 24  | 21  | 29  | 19 |
| 2   | 5   | 5   | 5   | 8   | 10  | 3   | 10  | 5   | 2  |
| 40  | 30  | 31  | 63  | 110 | 98  | 72  | 58  | 57  | 36 |
| 63  | 72  | 57  | 61  | 66  | 57  | 65  | 56  | 73  | 58 |
| 71  | 74  | 93  | 83  | 112 | 86  | 108 | 119 | 133 | 77 |
| 60  | 75  | 73  | 95  | 132 | 119 | 75  | 85  | 111 | 69 |
| 26  | 46  | 34  | 24  | 38  | 32  | 28  | 28  | 34  | 29 |
| 67  | 62  | 63  | 109 | 101 | 115 | 121 | 108 | 105 | 55 |
| 72  | 53  | 63  | 92  | 136 | 99  | 95  | 99  | 93  | 63 |
| 47  | 44  | 61  | 71  | 76  | 91  | 78  | 87  | 75  | 60 |
| 108 | 114 | 102 | 84  | 107 | 81  | 117 | 92  | 115 | 79 |
| 8   | 13  | 8   | 4   | 4   | 6   | 4   | 6   | 12  | 6  |
| 82  | 65  | 83  | 136 | 152 | 127 | 247 | 242 | 263 | 99 |

|    |     |     |     |     |     |     |     |     |     |
|----|-----|-----|-----|-----|-----|-----|-----|-----|-----|
| 39 | 24  | 38  | 36  | 38  | 33  | 36  | 30  | 31  | 30  |
| 34 | 35  | 30  | 15  | 27  | 27  | 28  | 24  | 15  | 23  |
| 90 | 106 | 119 | 100 | 109 | 107 | 176 | 187 | 187 | 116 |
| 43 | 76  | 61  | 42  | 70  | 56  | 57  | 56  | 57  | 50  |
| 57 | 48  | 48  | 105 | 113 | 102 | 125 | 120 | 104 | 62  |
| 45 | 49  | 39  | 116 | 144 | 139 | 101 | 100 | 117 | 73  |
| 25 | 28  | 30  | 28  | 42  | 41  | 48  | 43  | 38  | 31  |
| 50 | 56  | 49  | 37  | 68  | 58  | 75  | 58  | 64  | 41  |
| 8  | 7   | 8   | 13  | 11  | 9   | 14  | 20  | 20  | 4   |
| 57 | 52  | 55  | 57  | 71  | 57  | 75  | 66  | 86  | 36  |
| 59 | 67  | 45  | 34  | 51  | 34  | 46  | 59  | 53  | 49  |
| 47 | 52  | 49  | 87  | 91  | 94  | 88  | 72  | 85  | 61  |
| 29 | 33  | 29  | 19  | 31  | 23  | 30  | 22  | 38  | 16  |
| 7  | 6   | 9   | 22  | 31  | 20  | 7   | 4   | 4   | 4   |
| 61 | 71  | 76  | 75  | 95  | 77  | 67  | 65  | 80  | 61  |
| 54 | 42  | 57  | 44  | 50  | 66  | 53  | 44  | 51  | 43  |
| 69 | 81  | 92  | 67  | 86  | 83  | 72  | 63  | 79  | 73  |
| 35 | 40  | 41  | 13  | 18  | 19  | 24  | 26  | 26  | 49  |
| 43 | 42  | 50  | 16  | 21  | 19  | 13  | 23  | 27  | 30  |
| 44 | 57  | 46  | 42  | 63  | 56  | 49  | 52  | 55  | 51  |
| 55 | 48  | 72  | 38  | 41  | 48  | 59  | 50  | 46  | 51  |
| 29 | 36  | 26  | 20  | 21  | 25  | 20  | 25  | 29  | 19  |
| 69 | 88  | 78  | 118 | 135 | 118 | 123 | 116 | 116 | 86  |
| 43 | 39  | 51  | 106 | 122 | 118 | 147 | 142 | 134 | 89  |
| 25 | 17  | 22  | 16  | 19  | 26  | 29  | 34  | 19  | 20  |
| 52 | 63  | 53  | 110 | 142 | 127 | 109 | 85  | 80  | 64  |
| 24 | 36  | 34  | 29  | 33  | 25  | 35  | 21  | 35  | 17  |
| 26 | 21  | 29  | 34  | 37  | 35  | 50  | 37  | 43  | 30  |
| 55 | 58  | 73  | 92  | 119 | 97  | 134 | 127 | 132 | 69  |
| 41 | 30  | 46  | 27  | 31  | 34  | 23  | 30  | 21  | 36  |
| 16 | 20  | 20  | 21  | 22  | 22  | 24  | 13  | 17  | 18  |
| 36 | 27  | 27  | 33  | 42  | 39  | 31  | 22  | 27  | 25  |
| 40 | 39  | 38  | 41  | 48  | 41  | 54  | 38  | 51  | 26  |
| 38 | 30  | 42  | 40  | 59  | 51  | 50  | 51  | 60  | 32  |
| 62 | 50  | 53  | 81  | 80  | 77  | 82  | 78  | 62  | 65  |
| 41 | 44  | 55  | 139 | 196 | 155 | 188 | 163 | 172 | 91  |
| 62 | 62  | 60  | 46  | 46  | 39  | 50  | 34  | 39  | 58  |
| 22 | 18  | 26  | 63  | 52  | 55  | 68  | 60  | 58  | 36  |
| 31 | 15  | 24  | 16  | 15  | 11  | 12  | 16  | 20  | 15  |
| 93 | 96  | 95  | 75  | 95  | 96  | 142 | 123 | 157 | 99  |
| 70 | 72  | 88  | 140 | 185 | 159 | 161 | 131 | 170 | 110 |

|     |     |     |     |     |     |     |     |     |     |
|-----|-----|-----|-----|-----|-----|-----|-----|-----|-----|
| 12  | 12  | 16  | 12  | 26  | 19  | 31  | 18  | 16  | 16  |
| 63  | 46  | 67  | 103 | 116 | 121 | 94  | 88  | 118 | 84  |
| 48  | 33  | 37  | 45  | 44  | 41  | 40  | 45  | 38  | 44  |
| 45  | 42  | 55  | 45  | 37  | 41  | 39  | 35  | 41  | 35  |
| 18  | 17  | 16  | 19  | 29  | 24  | 25  | 18  | 13  | 24  |
| 39  | 41  | 49  | 54  | 74  | 63  | 68  | 54  | 54  | 43  |
| 52  | 55  | 47  | 114 | 112 | 98  | 128 | 102 | 93  | 53  |
| 32  | 36  | 47  | 20  | 31  | 28  | 28  | 30  | 32  | 36  |
| 101 | 75  | 113 | 87  | 88  | 90  | 102 | 104 | 135 | 99  |
| 55  | 50  | 52  | 42  | 69  | 71  | 63  | 72  | 67  | 56  |
| 38  | 36  | 39  | 57  | 80  | 70  | 49  | 33  | 50  | 33  |
| 52  | 44  | 49  | 158 | 191 | 165 | 165 | 156 | 149 | 85  |
| 33  | 40  | 33  | 27  | 28  | 21  | 22  | 18  | 20  | 29  |
| 32  | 34  | 35  | 37  | 42  | 30  | 27  | 43  | 29  | 21  |
| 36  | 45  | 37  | 11  | 28  | 26  | 43  | 35  | 42  | 33  |
| 91  | 127 | 117 | 249 | 319 | 265 | 325 | 290 | 323 | 179 |
| 31  | 28  | 33  | 34  | 37  | 34  | 57  | 34  | 42  | 37  |
| 55  | 60  | 58  | 141 | 157 | 132 | 154 | 146 | 185 | 94  |
| 44  | 44  | 57  | 15  | 20  | 22  | 26  | 21  | 28  | 38  |
| 114 | 138 | 124 | 69  | 94  | 83  | 95  | 120 | 129 | 122 |
| 12  | 22  | 16  | 23  | 27  | 31  | 36  | 23  | 33  | 21  |
| 19  | 22  | 25  | 17  | 19  | 14  | 18  | 16  | 17  | 26  |
| 52  | 59  | 68  | 63  | 73  | 69  | 66  | 57  | 60  | 38  |
| 21  | 18  | 22  | 17  | 26  | 24  | 31  | 25  | 28  | 19  |
| 14  | 20  | 29  | 9   | 13  | 11  | 10  | 12  | 9   | 21  |
| 55  | 52  | 61  | 62  | 85  | 81  | 71  | 56  | 69  | 47  |
| 77  | 61  | 72  | 31  | 56  | 49  | 72  | 60  | 58  | 64  |
| 30  | 33  | 27  | 40  | 39  | 44  | 37  | 44  | 46  | 31  |
| 46  | 50  | 58  | 44  | 70  | 57  | 67  | 61  | 55  | 49  |
| 48  | 81  | 61  | 72  | 85  | 68  | 79  | 104 | 83  | 63  |
| 24  | 41  | 37  | 30  | 28  | 28  | 24  | 26  | 23  | 35  |
| 60  | 80  | 69  | 96  | 122 | 89  | 131 | 124 | 147 | 89  |
| 37  | 38  | 44  | 36  | 40  | 34  | 42  | 53  | 57  | 48  |
| 36  | 31  | 31  | 20  | 34  | 31  | 25  | 31  | 28  | 24  |
| 26  | 25  | 35  | 25  | 24  | 28  | 29  | 35  | 30  | 16  |
| 66  | 69  | 62  | 52  | 64  | 60  | 55  | 54  | 62  | 64  |
| 17  | 22  | 17  | 15  | 12  | 10  | 6   | 10  | 11  | 3   |
| 36  | 33  | 33  | 26  | 39  | 28  | 28  | 30  | 40  | 44  |
| 52  | 72  | 66  | 47  | 67  | 63  | 64  | 53  | 47  | 37  |
| 30  | 43  | 44  | 80  | 61  | 64  | 68  | 74  | 74  | 42  |
| 26  | 36  | 39  | 22  | 19  | 20  | 26  | 11  | 40  | 31  |

|     |     |     |     |     |     |     |     |     |     |
|-----|-----|-----|-----|-----|-----|-----|-----|-----|-----|
| 42  | 53  | 46  | 18  | 27  | 16  | 22  | 25  | 24  | 31  |
| 18  | 27  | 33  | 127 | 133 | 98  | 97  | 72  | 78  | 43  |
| 53  | 60  | 39  | 65  | 65  | 82  | 74  | 51  | 52  | 50  |
| 65  | 61  | 58  | 54  | 76  | 70  | 64  | 58  | 60  | 61  |
| 20  | 33  | 35  | 30  | 31  | 22  | 30  | 23  | 27  | 25  |
| 44  | 46  | 49  | 54  | 77  | 73  | 65  | 59  | 61  | 52  |
| 43  | 36  | 33  | 39  | 50  | 34  | 61  | 50  | 60  | 24  |
| 43  | 38  | 38  | 34  | 42  | 36  | 50  | 52  | 41  | 39  |
| 11  | 9   | 12  | 9   | 20  | 12  | 14  | 17  | 19  | 12  |
| 37  | 32  | 32  | 82  | 120 | 83  | 105 | 72  | 100 | 60  |
| 58  | 46  | 62  | 74  | 93  | 83  | 79  | 94  | 92  | 56  |
| 18  | 21  | 32  | 106 | 137 | 116 | 88  | 57  | 63  | 38  |
| 23  | 28  | 34  | 39  | 37  | 26  | 25  | 21  | 27  | 17  |
| 115 | 116 | 133 | 134 | 156 | 168 | 208 | 150 | 210 | 157 |
| 26  | 13  | 20  | 11  | 27  | 19  | 22  | 20  | 12  | 20  |
| 43  | 51  | 56  | 125 | 171 | 176 | 137 | 108 | 113 | 74  |
| 38  | 54  | 56  | 106 | 138 | 125 | 122 | 97  | 103 | 69  |
| 45  | 39  | 51  | 59  | 65  | 71  | 52  | 55  | 67  | 31  |
| 39  | 33  | 43  | 79  | 97  | 78  | 72  | 60  | 73  | 46  |
| 35  | 40  | 38  | 78  | 85  | 77  | 91  | 78  | 78  | 53  |
| 30  | 40  | 40  | 47  | 54  | 46  | 53  | 48  | 66  | 53  |
| 40  | 34  | 45  | 68  | 70  | 47  | 37  | 31  | 43  | 26  |
| 49  | 36  | 41  | 19  | 23  | 17  | 18  | 22  | 20  | 30  |
| 48  | 48  | 44  | 54  | 57  | 45  | 62  | 49  | 73  | 46  |
| 55  | 58  | 57  | 48  | 65  | 52  | 50  | 62  | 63  | 40  |
| 10  | 11  | 13  | 12  | 15  | 9   | 6   | 6   | 7   | 7   |
| 46  | 52  | 44  | 36  | 38  | 47  | 35  | 49  | 51  | 32  |
| 45  | 55  | 51  | 62  | 91  | 89  | 76  | 76  | 84  | 57  |
| 65  | 54  | 66  | 26  | 28  | 27  | 38  | 19  | 34  | 45  |
| 9   | 15  | 9   | 2   | 6   | 2   | 7   | 5   | 3   | 2   |
| 32  | 33  | 17  | 32  | 27  | 37  | 17  | 26  | 25  | 31  |
| 30  | 31  | 40  | 39  | 62  | 37  | 49  | 35  | 46  | 29  |
| 63  | 37  | 57  | 65  | 83  | 67  | 90  | 89  | 112 | 60  |
| 68  | 60  | 61  | 125 | 208 | 135 | 110 | 108 | 123 | 80  |
| 18  | 21  | 23  | 17  | 17  | 12  | 15  | 15  | 17  | 20  |
| 35  | 46  | 51  | 94  | 106 | 93  | 94  | 99  | 108 | 40  |
| 122 | 148 | 132 | 108 | 140 | 135 | 167 | 106 | 134 | 133 |
| 49  | 48  | 48  | 68  | 70  | 65  | 65  | 59  | 91  | 61  |
| 10  | 10  | 12  | 26  | 28  | 21  | 14  | 11  | 15  | 11  |
| 14  | 11  | 19  | 6   | 14  | 6   | 6   | 2   | 8   | 10  |
| 37  | 52  | 43  | 45  | 44  | 35  | 51  | 56  | 62  | 52  |



|    |    |    |     |     |     |     |     |     |    |
|----|----|----|-----|-----|-----|-----|-----|-----|----|
| 15 | 22 | 17 | 10  | 15  | 18  | 14  | 11  | 13  | 25 |
| 62 | 59 | 65 | 72  | 91  | 72  | 60  | 53  | 65  | 60 |
| 51 | 66 | 64 | 36  | 46  | 44  | 58  | 68  | 69  | 59 |
| 48 | 42 | 36 | 52  | 58  | 68  | 54  | 53  | 53  | 53 |
| 39 | 64 | 59 | 16  | 24  | 20  | 31  | 24  | 30  | 40 |
| 42 | 56 | 41 | 113 | 135 | 135 | 113 | 101 | 121 | 55 |
| 58 | 64 | 54 | 68  | 79  | 72  | 80  | 69  | 65  | 55 |
| 38 | 29 | 27 | 66  | 58  | 54  | 77  | 67  | 64  | 43 |
| 63 | 70 | 79 | 36  | 37  | 35  | 63  | 62  | 42  | 46 |
| 63 | 53 | 55 | 129 | 144 | 108 | 119 | 91  | 120 | 72 |
| 31 | 34 | 53 | 32  | 37  | 30  | 34  | 25  | 26  | 22 |
| 23 | 30 | 31 | 38  | 48  | 37  | 51  | 35  | 34  | 29 |
| 12 | 11 | 16 | 15  | 32  | 22  | 17  | 19  | 21  | 16 |
| 29 | 31 | 31 | 45  | 64  | 55  | 34  | 46  | 63  | 36 |
| 28 | 22 | 22 | 43  | 49  | 40  | 34  | 34  | 37  | 29 |
| 31 | 18 | 26 | 14  | 24  | 13  | 15  | 25  | 23  | 17 |
| 29 | 31 | 48 | 38  | 46  | 47  | 38  | 35  | 41  | 20 |
| 63 | 79 | 79 | 174 | 195 | 198 | 160 | 121 | 157 | 80 |
| 11 | 20 | 19 | 4   | 7   | 8   | 11  | 6   | 12  | 13 |
| 3  | 8  | 7  | 0   | 2   | 1   | 2   | 2   | 4   | 0  |
| 25 | 22 | 21 | 70  | 85  | 54  | 75  | 44  | 55  | 21 |
| 52 | 53 | 63 | 62  | 65  | 60  | 67  | 66  | 94  | 54 |
| 37 | 39 | 42 | 48  | 86  | 69  | 60  | 47  | 60  | 38 |
| 21 | 16 | 10 | 10  | 21  | 15  | 11  | 17  | 13  | 17 |
| 34 | 37 | 65 | 52  | 55  | 50  | 55  | 45  | 47  | 35 |
| 16 | 10 | 14 | 40  | 64  | 41  | 41  | 37  | 33  | 21 |
| 21 | 21 | 18 | 22  | 39  | 24  | 26  | 20  | 29  | 14 |
| 23 | 27 | 31 | 46  | 65  | 58  | 40  | 29  | 36  | 20 |
| 11 | 19 | 13 | 17  | 17  | 15  | 22  | 22  | 19  | 19 |
| 47 | 37 | 46 | 45  | 51  | 33  | 49  | 56  | 47  | 46 |
| 66 | 73 | 82 | 38  | 50  | 47  | 50  | 70  | 78  | 66 |
| 29 | 21 | 24 | 16  | 32  | 17  | 16  | 7   | 8   | 16 |
| 69 | 79 | 94 | 69  | 63  | 80  | 84  | 70  | 97  | 93 |
| 35 | 53 | 48 | 48  | 46  | 37  | 86  | 64  | 69  | 50 |
| 46 | 30 | 39 | 44  | 42  | 36  | 40  | 39  | 41  | 31 |
| 61 | 73 | 80 | 63  | 56  | 43  | 103 | 88  | 76  | 68 |
| 20 | 17 | 19 | 45  | 67  | 61  | 57  | 46  | 60  | 26 |
| 27 | 27 | 29 | 8   | 22  | 19  | 22  | 26  | 20  | 28 |
| 58 | 50 | 45 | 65  | 94  | 68  | 110 | 95  | 108 | 48 |
| 83 | 62 | 73 | 100 | 113 | 102 | 97  | 91  | 112 | 56 |
| 18 | 34 | 28 | 35  | 38  | 35  | 44  | 39  | 28  | 28 |

|     |     |     |     |     |     |     |     |     |     |
|-----|-----|-----|-----|-----|-----|-----|-----|-----|-----|
| 41  | 38  | 53  | 252 | 320 | 285 | 427 | 371 | 410 | 218 |
| 45  | 34  | 38  | 19  | 27  | 24  | 31  | 30  | 26  | 32  |
| 56  | 66  | 61  | 152 | 178 | 139 | 183 | 137 | 159 | 88  |
| 121 | 133 | 165 | 254 | 307 | 304 | 441 | 450 | 467 | 210 |
| 48  | 62  | 54  | 81  | 128 | 87  | 112 | 96  | 114 | 73  |
| 51  | 50  | 45  | 31  | 42  | 34  | 64  | 64  | 62  | 58  |
| 21  | 13  | 16  | 27  | 26  | 30  | 33  | 28  | 32  | 21  |
| 36  | 25  | 39  | 82  | 129 | 89  | 89  | 49  | 80  | 40  |
| 13  | 25  | 20  | 10  | 17  | 13  | 16  | 20  | 18  | 18  |
| 49  | 44  | 53  | 62  | 76  | 87  | 81  | 76  | 67  | 50  |
| 15  | 13  | 19  | 12  | 16  | 7   | 18  | 12  | 22  | 21  |
| 55  | 70  | 73  | 119 | 176 | 152 | 179 | 150 | 196 | 76  |
| 21  | 31  | 25  | 15  | 12  | 13  | 15  | 14  | 23  | 21  |
| 16  | 23  | 37  | 197 | 264 | 187 | 165 | 124 | 147 | 67  |
| 307 | 289 | 371 | 249 | 272 | 243 | 288 | 251 | 316 | 285 |
| 75  | 85  | 88  | 122 | 116 | 105 | 115 | 95  | 116 | 82  |
| 48  | 50  | 42  | 105 | 153 | 111 | 112 | 100 | 124 | 49  |
| 47  | 53  | 60  | 52  | 76  | 62  | 54  | 56  | 57  | 48  |
| 37  | 37  | 48  | 34  | 50  | 41  | 58  | 40  | 71  | 32  |
| 26  | 20  | 31  | 11  | 15  | 14  | 13  | 10  | 16  | 19  |
| 39  | 38  | 35  | 32  | 59  | 54  | 29  | 41  | 58  | 33  |
| 42  | 43  | 54  | 45  | 64  | 47  | 52  | 66  | 56  | 40  |
| 49  | 43  | 54  | 59  | 81  | 64  | 40  | 47  | 52  | 52  |
| 25  | 42  | 26  | 32  | 41  | 47  | 65  | 49  | 64  | 47  |
| 29  | 46  | 37  | 23  | 17  | 22  | 47  | 31  | 36  | 33  |
| 26  | 18  | 22  | 39  | 57  | 34  | 74  | 52  | 67  | 47  |
| 34  | 26  | 41  | 27  | 35  | 16  | 35  | 37  | 49  | 37  |
| 14  | 19  | 20  | 3   | 9   | 17  | 8   | 8   | 10  | 12  |
| 63  | 48  | 52  | 198 | 255 | 235 | 300 | 328 | 391 | 158 |
| 31  | 30  | 42  | 34  | 32  | 35  | 24  | 30  | 24  | 20  |
| 55  | 66  | 72  | 52  | 55  | 61  | 39  | 42  | 44  | 51  |
| 22  | 29  | 17  | 30  | 59  | 45  | 49  | 47  | 37  | 25  |
| 25  | 24  | 33  | 37  | 59  | 42  | 35  | 46  | 50  | 41  |
| 31  | 34  | 36  | 46  | 46  | 47  | 31  | 38  | 42  | 36  |
| 30  | 30  | 30  | 54  | 67  | 51  | 66  | 50  | 63  | 38  |
| 60  | 55  | 58  | 42  | 63  | 54  | 56  | 53  | 67  | 42  |
| 22  | 20  | 14  | 39  | 34  | 41  | 24  | 33  | 30  | 14  |
| 13  | 9   | 10  | 20  | 35  | 30  | 21  | 11  | 20  | 11  |
| 32  | 41  | 49  | 59  | 66  | 87  | 43  | 67  | 46  | 37  |
| 27  | 21  | 16  | 47  | 45  | 34  | 34  | 27  | 38  | 20  |
| 52  | 45  | 54  | 67  | 89  | 72  | 55  | 54  | 77  | 53  |

|     |    |    |     |     |     |     |     |     |    |
|-----|----|----|-----|-----|-----|-----|-----|-----|----|
| 26  | 21 | 26 | 21  | 24  | 30  | 17  | 15  | 23  | 15 |
| 34  | 28 | 37 | 62  | 63  | 63  | 64  | 67  | 53  | 28 |
| 24  | 31 | 32 | 72  | 97  | 78  | 73  | 56  | 59  | 32 |
| 26  | 34 | 35 | 29  | 34  | 26  | 26  | 27  | 33  | 28 |
| 76  | 61 | 64 | 138 | 159 | 164 | 124 | 124 | 127 | 80 |
| 44  | 50 | 36 | 28  | 31  | 36  | 37  | 31  | 23  | 36 |
| 111 | 98 | 99 | 57  | 56  | 57  | 92  | 82  | 96  | 66 |
| 66  | 69 | 64 | 64  | 68  | 69  | 68  | 69  | 79  | 59 |
| 18  | 24 | 33 | 31  | 30  | 42  | 42  | 24  | 39  | 26 |
| 69  | 98 | 76 | 86  | 96  | 97  | 110 | 115 | 107 | 83 |
| 30  | 25 | 50 | 67  | 76  | 59  | 89  | 61  | 68  | 42 |
| 62  | 58 | 64 | 117 | 147 | 135 | 143 | 123 | 128 | 66 |
| 63  | 53 | 48 | 82  | 104 | 110 | 88  | 73  | 68  | 47 |
| 24  | 22 | 26 | 42  | 42  | 51  | 47  | 45  | 49  | 25 |
| 21  | 35 | 35 | 66  | 67  | 55  | 83  | 93  | 64  | 48 |
| 4   | 9  | 13 | 5   | 2   | 3   | 0   | 7   | 3   | 5  |
| 47  | 65 | 60 | 59  | 75  | 82  | 67  | 47  | 69  | 51 |
| 27  | 32 | 41 | 30  | 29  | 51  | 32  | 42  | 43  | 33 |
| 30  | 41 | 37 | 103 | 104 | 96  | 108 | 77  | 79  | 52 |
| 20  | 29 | 26 | 39  | 48  | 47  | 46  | 40  | 24  | 24 |
| 73  | 66 | 87 | 146 | 177 | 155 | 110 | 108 | 88  | 64 |
| 37  | 43 | 31 | 56  | 48  | 57  | 54  | 41  | 47  | 27 |
| 37  | 46 | 29 | 90  | 113 | 91  | 102 | 103 | 102 | 58 |
| 33  | 26 | 27 | 8   | 9   | 7   | 11  | 15  | 7   | 14 |
| 45  | 34 | 37 | 28  | 40  | 36  | 40  | 38  | 23  | 36 |
| 41  | 35 | 47 | 107 | 139 | 106 | 73  | 85  | 69  | 50 |
| 55  | 56 | 72 | 103 | 126 | 116 | 137 | 150 | 125 | 65 |
| 37  | 52 | 50 | 51  | 69  | 51  | 78  | 58  | 61  | 43 |
| 76  | 94 | 95 | 119 | 156 | 123 | 117 | 103 | 97  | 94 |
| 22  | 35 | 39 | 38  | 53  | 54  | 42  | 36  | 39  | 25 |
| 49  | 54 | 47 | 62  | 76  | 72  | 96  | 102 | 106 | 68 |
| 28  | 23 | 31 | 14  | 20  | 24  | 21  | 13  | 27  | 32 |
| 21  | 26 | 28 | 50  | 71  | 49  | 81  | 48  | 61  | 41 |
| 70  | 52 | 62 | 112 | 159 | 120 | 116 | 92  | 120 | 76 |
| 42  | 35 | 48 | 38  | 47  | 38  | 46  | 50  | 46  | 35 |
| 38  | 47 | 43 | 145 | 188 | 153 | 162 | 138 | 160 | 52 |
| 18  | 25 | 37 | 326 | 441 | 286 | 228 | 200 | 247 | 87 |
| 62  | 82 | 75 | 136 | 159 | 114 | 142 | 117 | 130 | 91 |
| 32  | 45 | 40 | 39  | 67  | 49  | 48  | 53  | 38  | 25 |
| 24  | 11 | 22 | 16  | 25  | 24  | 24  | 12  | 20  | 15 |
| 83  | 73 | 78 | 101 | 98  | 98  | 97  | 76  | 91  | 82 |

|    |    |     |     |     |     |     |     |     |     |
|----|----|-----|-----|-----|-----|-----|-----|-----|-----|
| 61 | 59 | 76  | 61  | 58  | 52  | 71  | 56  | 71  | 61  |
| 49 | 49 | 59  | 67  | 114 | 99  | 81  | 83  | 95  | 58  |
| 45 | 43 | 52  | 53  | 41  | 60  | 66  | 51  | 68  | 50  |
| 32 | 41 | 40  | 79  | 80  | 82  | 81  | 63  | 88  | 48  |
| 17 | 14 | 25  | 16  | 9   | 10  | 10  | 14  | 24  | 20  |
| 37 | 40 | 34  | 75  | 97  | 85  | 88  | 76  | 66  | 46  |
| 28 | 21 | 20  | 14  | 6   | 10  | 16  | 15  | 10  | 13  |
| 37 | 36 | 23  | 57  | 63  | 64  | 58  | 42  | 56  | 29  |
| 60 | 66 | 63  | 95  | 96  | 87  | 90  | 84  | 96  | 63  |
| 36 | 38 | 44  | 77  | 101 | 99  | 54  | 46  | 64  | 50  |
| 54 | 70 | 62  | 118 | 119 | 115 | 170 | 148 | 143 | 80  |
| 27 | 41 | 32  | 39  | 40  | 36  | 54  | 39  | 40  | 30  |
| 41 | 41 | 40  | 33  | 20  | 39  | 33  | 30  | 24  | 37  |
| 10 | 5  | 6   | 4   | 2   | 4   | 6   | 3   | 7   | 5   |
| 17 | 15 | 18  | 44  | 55  | 51  | 37  | 25  | 34  | 15  |
| 67 | 64 | 81  | 137 | 182 | 170 | 150 | 135 | 177 | 83  |
| 22 | 30 | 36  | 19  | 21  | 13  | 17  | 14  | 17  | 36  |
| 11 | 16 | 12  | 20  | 18  | 29  | 14  | 10  | 11  | 16  |
| 29 | 35 | 37  | 94  | 125 | 99  | 67  | 59  | 74  | 38  |
| 27 | 42 | 31  | 50  | 53  | 55  | 58  | 46  | 43  | 20  |
| 60 | 61 | 56  | 330 | 431 | 331 | 285 | 248 | 262 | 122 |
| 18 | 17 | 14  | 34  | 43  | 39  | 32  | 21  | 29  | 15  |
| 22 | 21 | 28  | 77  | 106 | 75  | 92  | 70  | 80  | 54  |
| 40 | 56 | 61  | 92  | 97  | 112 | 98  | 105 | 79  | 64  |
| 39 | 43 | 38  | 42  | 48  | 49  | 43  | 41  | 44  | 30  |
| 75 | 75 | 104 | 76  | 80  | 74  | 81  | 91  | 76  | 67  |
| 41 | 45 | 55  | 59  | 71  | 59  | 81  | 62  | 72  | 48  |
| 30 | 36 | 38  | 21  | 38  | 30  | 25  | 27  | 26  | 24  |
| 32 | 28 | 25  | 49  | 54  | 59  | 36  | 30  | 32  | 34  |
| 82 | 66 | 97  | 139 | 147 | 116 | 131 | 131 | 151 | 86  |
| 34 | 33 | 40  | 25  | 44  | 38  | 49  | 47  | 35  | 41  |
| 43 | 48 | 54  | 106 | 161 | 90  | 83  | 76  | 85  | 45  |
| 20 | 30 | 22  | 41  | 43  | 34  | 25  | 31  | 25  | 17  |
| 49 | 52 | 58  | 158 | 200 | 208 | 222 | 208 | 219 | 112 |
| 29 | 35 | 40  | 27  | 44  | 39  | 40  | 43  | 29  | 32  |
| 43 | 42 | 48  | 53  | 57  | 47  | 46  | 52  | 38  | 44  |
| 44 | 35 | 55  | 133 | 188 | 138 | 152 | 132 | 156 | 74  |
| 18 | 18 | 16  | 9   | 10  | 14  | 13  | 10  | 7   | 16  |
| 44 | 35 | 44  | 26  | 49  | 43  | 37  | 29  | 24  | 38  |
| 45 | 35 | 50  | 23  | 37  | 27  | 26  | 21  | 38  | 25  |
| 35 | 36 | 29  | 42  | 53  | 34  | 55  | 35  | 46  | 27  |

|     |     |     |     |     |     |     |     |     |     |
|-----|-----|-----|-----|-----|-----|-----|-----|-----|-----|
| 45  | 46  | 34  | 41  | 59  | 44  | 70  | 64  | 74  | 46  |
| 64  | 55  | 82  | 65  | 104 | 81  | 83  | 93  | 80  | 69  |
| 89  | 106 | 105 | 41  | 44  | 41  | 64  | 74  | 79  | 77  |
| 38  | 33  | 44  | 40  | 52  | 35  | 41  | 37  | 44  | 38  |
| 33  | 28  | 28  | 165 | 227 | 187 | 168 | 143 | 184 | 86  |
| 43  | 55  | 54  | 85  | 110 | 105 | 82  | 63  | 85  | 39  |
| 31  | 20  | 37  | 68  | 81  | 98  | 83  | 67  | 81  | 38  |
| 54  | 45  | 53  | 135 | 154 | 149 | 140 | 122 | 129 | 52  |
| 33  | 23  | 26  | 29  | 55  | 31  | 35  | 28  | 33  | 27  |
| 60  | 65  | 68  | 78  | 93  | 88  | 93  | 76  | 88  | 47  |
| 68  | 67  | 69  | 95  | 139 | 141 | 114 | 98  | 100 | 66  |
| 51  | 47  | 62  | 14  | 15  | 18  | 34  | 28  | 29  | 40  |
| 66  | 65  | 75  | 277 | 352 | 274 | 303 | 285 | 278 | 142 |
| 27  | 16  | 26  | 33  | 74  | 64  | 75  | 63  | 65  | 34  |
| 41  | 31  | 57  | 48  | 69  | 55  | 75  | 49  | 44  | 47  |
| 81  | 108 | 119 | 130 | 167 | 141 | 151 | 154 | 140 | 122 |
| 25  | 37  | 43  | 61  | 73  | 59  | 50  | 57  | 57  | 42  |
| 28  | 25  | 23  | 22  | 28  | 36  | 27  | 27  | 36  | 23  |
| 2   | 6   | 2   | 3   | 1   | 1   | 5   | 3   | 1   | 1   |
| 58  | 58  | 77  | 46  | 71  | 78  | 62  | 63  | 64  | 46  |
| 22  | 23  | 31  | 26  | 21  | 26  | 24  | 22  | 27  | 25  |
| 11  | 17  | 11  | 9   | 14  | 11  | 11  | 8   | 10  | 16  |
| 89  | 83  | 84  | 81  | 75  | 69  | 66  | 63  | 64  | 56  |
| 98  | 90  | 97  | 53  | 83  | 72  | 69  | 64  | 81  | 81  |
| 33  | 18  | 31  | 37  | 40  | 32  | 27  | 41  | 46  | 36  |
| 36  | 41  | 27  | 97  | 107 | 98  | 80  | 83  | 81  | 46  |
| 32  | 33  | 38  | 32  | 33  | 29  | 39  | 27  | 37  | 24  |
| 5   | 10  | 12  | 4   | 3   | 6   | 5   | 5   | 6   | 5   |
| 43  | 46  | 43  | 16  | 16  | 14  | 33  | 37  | 42  | 39  |
| 37  | 42  | 48  | 86  | 112 | 125 | 93  | 86  | 91  | 57  |
| 35  | 36  | 57  | 77  | 98  | 71  | 68  | 66  | 93  | 29  |
| 114 | 170 | 168 | 211 | 294 | 213 | 321 | 251 | 328 | 181 |
| 3   | 3   | 7   | 3   | 3   | 1   | 6   | 6   | 4   | 0   |
| 16  | 28  | 26  | 18  | 23  | 25  | 20  | 24  | 20  | 28  |
| 32  | 44  | 45  | 47  | 63  | 58  | 60  | 56  | 71  | 41  |
| 46  | 49  | 58  | 36  | 34  | 34  | 31  | 39  | 44  | 44  |
| 24  | 38  | 34  | 17  | 8   | 5   | 9   | 6   | 6   | 22  |
| 54  | 52  | 72  | 216 | 237 | 223 | 228 | 200 | 235 | 103 |
| 34  | 46  | 44  | 22  | 24  | 22  | 36  | 29  | 27  | 25  |
| 37  | 36  | 41  | 17  | 33  | 22  | 23  | 16  | 15  | 26  |
| 45  | 42  | 38  | 20  | 23  | 24  | 24  | 32  | 29  | 34  |

|     |     |     |     |     |     |     |     |     |     |
|-----|-----|-----|-----|-----|-----|-----|-----|-----|-----|
| 37  | 41  | 50  | 25  | 48  | 23  | 38  | 37  | 26  | 28  |
| 23  | 30  | 44  | 45  | 64  | 43  | 53  | 39  | 53  | 36  |
| 122 | 140 | 128 | 37  | 32  | 48  | 66  | 70  | 78  | 93  |
| 109 | 98  | 95  | 96  | 82  | 74  | 102 | 81  | 95  | 80  |
| 25  | 16  | 28  | 36  | 53  | 52  | 39  | 33  | 47  | 30  |
| 30  | 33  | 37  | 50  | 52  | 40  | 31  | 14  | 24  | 33  |
| 22  | 24  | 24  | 13  | 39  | 36  | 39  | 28  | 44  | 27  |
| 42  | 33  | 34  | 31  | 48  | 44  | 32  | 26  | 28  | 30  |
| 15  | 19  | 19  | 27  | 21  | 24  | 38  | 32  | 19  | 13  |
| 39  | 27  | 36  | 39  | 51  | 42  | 42  | 37  | 37  | 34  |
| 43  | 36  | 52  | 20  | 18  | 23  | 17  | 24  | 18  | 44  |
| 98  | 97  | 83  | 236 | 338 | 307 | 492 | 449 | 445 | 209 |
| 24  | 16  | 26  | 7   | 14  | 14  | 15  | 5   | 6   | 8   |
| 22  | 21  | 26  | 9   | 22  | 14  | 12  | 11  | 18  | 16  |
| 42  | 40  | 43  | 120 | 119 | 142 | 138 | 115 | 120 | 59  |
| 42  | 50  | 43  | 53  | 76  | 54  | 43  | 38  | 53  | 48  |
| 54  | 36  | 49  | 45  | 74  | 58  | 65  | 61  | 58  | 50  |
| 65  | 45  | 49  | 214 | 320 | 243 | 343 | 285 | 321 | 146 |
| 35  | 23  | 36  | 17  | 9   | 9   | 17  | 16  | 10  | 22  |
| 56  | 42  | 51  | 39  | 51  | 39  | 42  | 29  | 26  | 33  |
| 27  | 32  | 33  | 82  | 111 | 111 | 72  | 62  | 69  | 23  |
| 18  | 16  | 21  | 47  | 45  | 42  | 41  | 40  | 52  | 31  |
| 54  | 63  | 65  | 85  | 113 | 92  | 80  | 81  | 116 | 42  |
| 9   | 15  | 14  | 3   | 6   | 5   | 10  | 8   | 4   | 14  |
| 59  | 58  | 71  | 41  | 77  | 50  | 77  | 82  | 85  | 54  |
| 157 | 141 | 173 | 230 | 287 | 251 | 378 | 370 | 357 | 193 |
| 40  | 40  | 45  | 183 | 223 | 191 | 167 | 167 | 195 | 84  |
| 43  | 32  | 56  | 80  | 85  | 84  | 88  | 86  | 69  | 61  |
| 48  | 38  | 35  | 47  | 53  | 43  | 64  | 48  | 67  | 39  |
| 35  | 45  | 54  | 23  | 33  | 34  | 16  | 26  | 23  | 37  |
| 53  | 42  | 54  | 61  | 61  | 50  | 33  | 59  | 49  | 54  |
| 76  | 64  | 66  | 40  | 47  | 45  | 37  | 36  | 45  | 42  |
| 50  | 63  | 68  | 66  | 74  | 60  | 78  | 53  | 63  | 55  |
| 48  | 34  | 44  | 42  | 49  | 48  | 59  | 49  | 56  | 45  |
| 26  | 12  | 22  | 20  | 24  | 17  | 21  | 10  | 24  | 14  |
| 46  | 41  | 53  | 70  | 101 | 82  | 71  | 64  | 68  | 44  |
| 45  | 36  | 40  | 76  | 84  | 76  | 78  | 75  | 83  | 43  |
| 20  | 23  | 22  | 24  | 42  | 28  | 27  | 26  | 36  | 20  |
| 56  | 45  | 62  | 96  | 112 | 95  | 106 | 92  | 112 | 58  |
| 41  | 54  | 52  | 42  | 56  | 38  | 45  | 38  | 37  | 39  |
| 21  | 14  | 13  | 41  | 47  | 47  | 34  | 30  | 44  | 17  |

|     |     |     |     |     |     |     |     |     |     |
|-----|-----|-----|-----|-----|-----|-----|-----|-----|-----|
| 56  | 59  | 54  | 51  | 68  | 40  | 84  | 79  | 78  | 68  |
| 37  | 44  | 35  | 45  | 64  | 60  | 67  | 59  | 81  | 39  |
| 44  | 48  | 63  | 45  | 41  | 49  | 40  | 34  | 40  | 51  |
| 32  | 29  | 43  | 185 | 246 | 188 | 274 | 224 | 262 | 116 |
| 26  | 30  | 18  | 24  | 29  | 29  | 17  | 30  | 26  | 32  |
| 16  | 20  | 18  | 6   | 13  | 11  | 19  | 9   | 17  | 12  |
| 21  | 22  | 27  | 31  | 41  | 39  | 24  | 27  | 31  | 19  |
| 40  | 42  | 47  | 39  | 53  | 45  | 49  | 35  | 41  | 33  |
| 32  | 37  | 36  | 42  | 49  | 65  | 46  | 45  | 44  | 38  |
| 38  | 52  | 40  | 109 | 133 | 125 | 178 | 172 | 167 | 79  |
| 46  | 66  | 70  | 99  | 130 | 108 | 107 | 77  | 91  | 47  |
| 17  | 25  | 22  | 14  | 17  | 21  | 31  | 21  | 24  | 27  |
| 102 | 114 | 117 | 134 | 148 | 127 | 198 | 205 | 216 | 109 |
| 67  | 54  | 47  | 123 | 149 | 144 | 128 | 138 | 130 | 71  |
| 65  | 45  | 49  | 228 | 305 | 271 | 303 | 250 | 287 | 121 |
| 20  | 22  | 20  | 20  | 23  | 30  | 23  | 18  | 12  | 17  |
| 58  | 75  | 72  | 104 | 119 | 118 | 56  | 62  | 65  | 48  |
| 49  | 48  | 56  | 26  | 39  | 41  | 32  | 33  | 43  | 42  |
| 18  | 27  | 29  | 59  | 70  | 63  | 49  | 46  | 41  | 26  |
| 29  | 36  | 28  | 35  | 44  | 32  | 34  | 25  | 23  | 23  |
| 22  | 16  | 21  | 20  | 30  | 33  | 33  | 45  | 37  | 19  |
| 41  | 36  | 56  | 22  | 28  | 24  | 25  | 26  | 15  | 20  |
| 41  | 28  | 43  | 25  | 26  | 29  | 38  | 25  | 29  | 24  |
| 84  | 59  | 73  | 43  | 64  | 64  | 109 | 80  | 100 | 49  |
| 16  | 28  | 44  | 70  | 86  | 86  | 89  | 65  | 70  | 41  |
| 38  | 31  | 49  | 117 | 126 | 124 | 95  | 84  | 109 | 59  |
| 87  | 114 | 116 | 76  | 134 | 78  | 89  | 104 | 102 | 89  |
| 16  | 15  | 9   | 7   | 5   | 7   | 5   | 5   | 7   | 7   |
| 59  | 50  | 60  | 35  | 54  | 46  | 54  | 48  | 55  | 56  |
| 62  | 62  | 65  | 50  | 72  | 54  | 84  | 86  | 87  | 60  |
| 29  | 27  | 34  | 20  | 20  | 23  | 36  | 43  | 28  | 22  |
| 11  | 4   | 11  | 38  | 38  | 30  | 31  | 30  | 37  | 11  |
| 22  | 28  | 44  | 170 | 234 | 179 | 173 | 176 | 201 | 77  |
| 35  | 34  | 36  | 11  | 18  | 24  | 12  | 12  | 20  | 23  |
| 41  | 30  | 41  | 41  | 56  | 62  | 62  | 57  | 49  | 49  |
| 42  | 53  | 45  | 226 | 246 | 161 | 156 | 144 | 173 | 73  |
| 68  | 73  | 86  | 89  | 110 | 93  | 111 | 109 | 111 | 61  |
| 52  | 53  | 48  | 19  | 30  | 16  | 46  | 58  | 40  | 40  |
| 38  | 43  | 48  | 55  | 86  | 73  | 102 | 71  | 77  | 46  |
| 44  | 49  | 50  | 34  | 36  | 29  | 27  | 29  | 19  | 33  |
| 68  | 81  | 61  | 89  | 91  | 91  | 94  | 80  | 117 | 61  |

|     |     |     |     |     |     |     |     |     |     |
|-----|-----|-----|-----|-----|-----|-----|-----|-----|-----|
| 35  | 34  | 30  | 74  | 76  | 58  | 80  | 87  | 81  | 58  |
| 20  | 16  | 20  | 16  | 25  | 25  | 20  | 13  | 11  | 12  |
| 58  | 57  | 66  | 93  | 99  | 89  | 80  | 66  | 79  | 50  |
| 11  | 11  | 8   | 13  | 13  | 18  | 19  | 18  | 22  | 10  |
| 31  | 30  | 32  | 39  | 55  | 43  | 31  | 33  | 34  | 31  |
| 51  | 46  | 45  | 48  | 55  | 57  | 74  | 60  | 75  | 48  |
| 56  | 53  | 47  | 84  | 89  | 87  | 83  | 79  | 102 | 51  |
| 50  | 40  | 42  | 31  | 45  | 49  | 49  | 33  | 42  | 51  |
| 89  | 84  | 90  | 110 | 126 | 112 | 168 | 160 | 178 | 85  |
| 54  | 48  | 67  | 144 | 194 | 152 | 168 | 156 | 169 | 80  |
| 25  | 25  | 29  | 18  | 24  | 16  | 9   | 22  | 19  | 29  |
| 34  | 34  | 42  | 24  | 36  | 36  | 41  | 44  | 46  | 37  |
| 35  | 44  | 36  | 53  | 52  | 44  | 51  | 48  | 51  | 42  |
| 40  | 45  | 43  | 30  | 72  | 48  | 70  | 67  | 84  | 58  |
| 34  | 30  | 21  | 27  | 44  | 44  | 37  | 39  | 59  | 25  |
| 31  | 26  | 44  | 32  | 36  | 28  | 29  | 26  | 31  | 33  |
| 10  | 11  | 15  | 55  | 70  | 42  | 16  | 23  | 22  | 15  |
| 76  | 79  | 91  | 345 | 453 | 384 | 462 | 466 | 496 | 221 |
| 50  | 53  | 59  | 71  | 100 | 80  | 91  | 81  | 81  | 49  |
| 36  | 31  | 36  | 59  | 69  | 42  | 71  | 67  | 78  | 33  |
| 113 | 121 | 125 | 127 | 140 | 144 | 209 | 155 | 168 | 129 |
| 45  | 48  | 57  | 56  | 76  | 69  | 69  | 53  | 53  | 37  |
| 43  | 46  | 56  | 25  | 26  | 28  | 33  | 26  | 36  | 34  |
| 34  | 22  | 39  | 25  | 32  | 37  | 24  | 36  | 30  | 26  |
| 129 | 144 | 154 | 71  | 90  | 102 | 113 | 92  | 98  | 75  |
| 13  | 16  | 48  | 15  | 21  | 12  | 20  | 25  | 13  | 24  |
| 25  | 35  | 34  | 20  | 35  | 32  | 37  | 30  | 37  | 35  |
| 48  | 45  | 65  | 94  | 109 | 110 | 111 | 91  | 105 | 54  |
| 34  | 44  | 38  | 53  | 51  | 36  | 39  | 44  | 42  | 33  |
| 30  | 37  | 34  | 36  | 49  | 40  | 43  | 32  | 46  | 35  |
| 100 | 83  | 122 | 153 | 174 | 157 | 139 | 151 | 157 | 122 |
| 40  | 29  | 45  | 58  | 78  | 63  | 65  | 55  | 67  | 55  |
| 67  | 61  | 51  | 87  | 131 | 111 | 61  | 69  | 73  | 47  |
| 56  | 68  | 80  | 301 | 421 | 319 | 317 | 271 | 273 | 122 |
| 28  | 21  | 29  | 23  | 31  | 27  | 20  | 22  | 22  | 18  |
| 7   | 11  | 14  | 10  | 7   | 4   | 12  | 6   | 5   | 8   |
| 53  | 63  | 48  | 62  | 79  | 66  | 106 | 94  | 105 | 67  |
| 21  | 23  | 20  | 32  | 35  | 44  | 48  | 39  | 35  | 25  |
| 58  | 50  | 60  | 108 | 136 | 134 | 86  | 64  | 71  | 42  |
| 43  | 36  | 41  | 101 | 154 | 125 | 117 | 119 | 136 | 66  |
| 37  | 37  | 37  | 26  | 32  | 34  | 34  | 30  | 31  | 22  |



|    |     |     |     |     |     |     |     |     |     |
|----|-----|-----|-----|-----|-----|-----|-----|-----|-----|
| 23 | 28  | 24  | 22  | 28  | 39  | 31  | 26  | 30  | 29  |
| 5  | 7   | 3   | 4   | 7   | 1   | 7   | 8   | 10  | 4   |
| 39 | 52  | 53  | 47  | 69  | 61  | 80  | 66  | 70  | 47  |
| 55 | 50  | 51  | 31  | 33  | 30  | 30  | 27  | 25  | 41  |
| 41 | 43  | 54  | 70  | 107 | 65  | 78  | 57  | 48  | 45  |
| 75 | 53  | 76  | 74  | 74  | 59  | 54  | 57  | 49  | 55  |
| 65 | 62  | 55  | 41  | 65  | 48  | 54  | 59  | 51  | 58  |
| 57 | 54  | 52  | 55  | 79  | 88  | 52  | 55  | 86  | 48  |
| 22 | 41  | 24  | 15  | 30  | 20  | 23  | 18  | 26  | 33  |
| 49 | 61  | 88  | 180 | 240 | 207 | 237 | 270 | 273 | 130 |
| 85 | 66  | 83  | 57  | 48  | 64  | 83  | 69  | 100 | 63  |
| 52 | 50  | 69  | 38  | 43  | 56  | 49  | 47  | 60  | 62  |
| 31 | 29  | 29  | 47  | 49  | 55  | 33  | 21  | 27  | 24  |
| 57 | 28  | 36  | 43  | 58  | 63  | 54  | 60  | 67  | 33  |
| 32 | 21  | 30  | 41  | 50  | 45  | 38  | 31  | 41  | 24  |
| 19 | 21  | 29  | 22  | 29  | 23  | 29  | 20  | 27  | 17  |
| 20 | 23  | 27  | 155 | 208 | 165 | 158 | 137 | 137 | 86  |
| 58 | 64  | 75  | 45  | 52  | 51  | 60  | 42  | 49  | 47  |
| 9  | 9   | 20  | 22  | 23  | 20  | 23  | 29  | 15  | 13  |
| 68 | 73  | 59  | 66  | 73  | 58  | 89  | 62  | 70  | 59  |
| 27 | 27  | 29  | 29  | 33  | 33  | 36  | 20  | 24  | 23  |
| 56 | 79  | 77  | 74  | 98  | 94  | 72  | 64  | 53  | 66  |
| 32 | 45  | 61  | 43  | 49  | 45  | 102 | 86  | 93  | 54  |
| 63 | 60  | 66  | 63  | 92  | 85  | 82  | 61  | 96  | 54  |
| 46 | 45  | 38  | 32  | 37  | 42  | 38  | 30  | 38  | 37  |
| 11 | 14  | 8   | 40  | 53  | 29  | 54  | 51  | 54  | 32  |
| 42 | 38  | 66  | 74  | 107 | 102 | 133 | 144 | 147 | 72  |
| 8  | 4   | 8   | 15  | 23  | 13  | 14  | 12  | 15  | 8   |
| 12 | 8   | 17  | 16  | 8   | 17  | 18  | 17  | 19  | 5   |
| 14 | 22  | 23  | 22  | 27  | 18  | 21  | 18  | 24  | 22  |
| 30 | 19  | 43  | 59  | 57  | 57  | 27  | 30  | 55  | 49  |
| 27 | 29  | 39  | 35  | 38  | 27  | 30  | 24  | 29  | 30  |
| 49 | 54  | 58  | 47  | 56  | 54  | 59  | 66  | 68  | 50  |
| 48 | 62  | 55  | 100 | 102 | 115 | 167 | 128 | 158 | 89  |
| 80 | 72  | 100 | 115 | 171 | 100 | 152 | 134 | 171 | 106 |
| 40 | 41  | 56  | 25  | 35  | 31  | 42  | 36  | 26  | 38  |
| 52 | 56  | 70  | 95  | 116 | 114 | 61  | 71  | 61  | 64  |
| 84 | 109 | 104 | 119 | 144 | 97  | 125 | 95  | 122 | 101 |
| 63 | 86  | 78  | 52  | 56  | 52  | 80  | 57  | 59  | 46  |
| 38 | 38  | 35  | 18  | 27  | 19  | 30  | 24  | 13  | 28  |
| 44 | 48  | 57  | 60  | 80  | 79  | 131 | 96  | 116 | 66  |

|     |    |     |     |     |     |     |     |     |     |
|-----|----|-----|-----|-----|-----|-----|-----|-----|-----|
| 26  | 33 | 37  | 27  | 34  | 35  | 40  | 25  | 26  | 28  |
| 12  | 25 | 17  | 34  | 46  | 44  | 36  | 52  | 36  | 37  |
| 64  | 53 | 69  | 61  | 80  | 69  | 68  | 57  | 40  | 46  |
| 36  | 53 | 39  | 26  | 47  | 36  | 41  | 38  | 49  | 37  |
| 28  | 40 | 41  | 20  | 26  | 23  | 31  | 25  | 35  | 29  |
| 47  | 43 | 48  | 36  | 44  | 43  | 42  | 40  | 33  | 33  |
| 54  | 36 | 50  | 70  | 75  | 61  | 64  | 49  | 50  | 39  |
| 91  | 91 | 100 | 117 | 162 | 164 | 135 | 147 | 160 | 81  |
| 48  | 53 | 50  | 51  | 77  | 77  | 49  | 38  | 43  | 37  |
| 59  | 53 | 58  | 47  | 51  | 46  | 60  | 45  | 50  | 57  |
| 12  | 14 | 16  | 36  | 29  | 23  | 54  | 41  | 44  | 16  |
| 18  | 26 | 19  | 10  | 16  | 12  | 19  | 12  | 20  | 12  |
| 22  | 22 | 20  | 29  | 41  | 25  | 35  | 35  | 41  | 20  |
| 11  | 5  | 6   | 5   | 11  | 12  | 10  | 10  | 13  | 11  |
| 68  | 63 | 68  | 49  | 69  | 67  | 55  | 70  | 79  | 58  |
| 18  | 28 | 22  | 22  | 21  | 12  | 14  | 16  | 13  | 18  |
| 48  | 50 | 48  | 10  | 21  | 19  | 33  | 41  | 42  | 45  |
| 6   | 5  | 13  | 113 | 172 | 98  | 78  | 53  | 59  | 28  |
| 54  | 53 | 63  | 150 | 174 | 130 | 157 | 179 | 160 | 73  |
| 55  | 65 | 62  | 84  | 83  | 64  | 104 | 117 | 136 | 85  |
| 74  | 68 | 88  | 102 | 138 | 107 | 139 | 114 | 110 | 81  |
| 32  | 28 | 31  | 21  | 32  | 27  | 31  | 15  | 19  | 31  |
| 34  | 46 | 32  | 68  | 86  | 64  | 98  | 96  | 92  | 57  |
| 13  | 10 | 14  | 11  | 13  | 7   | 10  | 7   | 10  | 8   |
| 30  | 31 | 37  | 44  | 36  | 42  | 43  | 26  | 42  | 35  |
| 101 | 88 | 95  | 153 | 214 | 195 | 245 | 213 | 212 | 124 |
| 31  | 40 | 38  | 49  | 63  | 32  | 44  | 31  | 39  | 29  |
| 11  | 23 | 26  | 29  | 29  | 27  | 33  | 31  | 40  | 22  |
| 51  | 55 | 60  | 94  | 95  | 117 | 55  | 69  | 64  | 63  |
| 90  | 77 | 100 | 135 | 158 | 122 | 176 | 149 | 161 | 81  |
| 39  | 42 | 39  | 35  | 58  | 45  | 46  | 44  | 48  | 42  |
| 33  | 38 | 53  | 50  | 52  | 37  | 57  | 52  | 44  | 31  |
| 38  | 36 | 43  | 15  | 10  | 16  | 21  | 22  | 24  | 37  |
| 26  | 30 | 34  | 4   | 11  | 5   | 7   | 8   | 10  | 21  |
| 16  | 12 | 11  | 14  | 17  | 15  | 8   | 6   | 8   | 11  |
| 57  | 62 | 40  | 87  | 101 | 90  | 117 | 114 | 111 | 60  |
| 42  | 38 | 53  | 42  | 42  | 38  | 66  | 70  | 64  | 55  |
| 53  | 58 | 47  | 121 | 140 | 144 | 107 | 104 | 98  | 72  |
| 21  | 21 | 22  | 26  | 19  | 34  | 30  | 26  | 21  | 28  |
| 32  | 29 | 31  | 17  | 11  | 19  | 22  | 21  | 17  | 25  |
| 48  | 51 | 43  | 50  | 51  | 37  | 36  | 51  | 41  | 49  |

|     |     |     |     |     |     |     |     |     |     |
|-----|-----|-----|-----|-----|-----|-----|-----|-----|-----|
| 28  | 32  | 26  | 5   | 5   | 4   | 8   | 5   | 6   | 12  |
| 35  | 30  | 38  | 38  | 45  | 37  | 41  | 50  | 41  | 28  |
| 8   | 20  | 27  | 88  | 132 | 134 | 72  | 62  | 70  | 33  |
| 17  | 16  | 15  | 17  | 16  | 18  | 11  | 10  | 27  | 29  |
| 43  | 49  | 38  | 22  | 24  | 19  | 25  | 24  | 26  | 43  |
| 26  | 35  | 41  | 30  | 36  | 35  | 50  | 35  | 46  | 27  |
| 41  | 32  | 41  | 34  | 37  | 33  | 49  | 33  | 49  | 30  |
| 39  | 29  | 31  | 13  | 22  | 13  | 15  | 16  | 25  | 24  |
| 32  | 33  | 31  | 49  | 44  | 49  | 43  | 50  | 50  | 25  |
| 42  | 46  | 53  | 16  | 14  | 16  | 19  | 19  | 27  | 30  |
| 33  | 46  | 41  | 126 | 153 | 134 | 89  | 99  | 100 | 61  |
| 47  | 34  | 55  | 39  | 37  | 28  | 55  | 46  | 52  | 50  |
| 42  | 45  | 47  | 93  | 122 | 104 | 102 | 95  | 97  | 44  |
| 29  | 33  | 26  | 46  | 52  | 55  | 68  | 52  | 61  | 26  |
| 56  | 64  | 50  | 141 | 186 | 183 | 112 | 98  | 99  | 54  |
| 35  | 40  | 27  | 40  | 39  | 46  | 39  | 29  | 30  | 31  |
| 30  | 45  | 30  | 33  | 46  | 31  | 39  | 32  | 33  | 29  |
| 33  | 46  | 46  | 48  | 61  | 37  | 40  | 27  | 27  | 48  |
| 41  | 36  | 40  | 96  | 116 | 107 | 99  | 76  | 115 | 60  |
| 49  | 41  | 46  | 52  | 85  | 55  | 54  | 48  | 58  | 57  |
| 64  | 71  | 86  | 57  | 80  | 74  | 91  | 98  | 112 | 71  |
| 65  | 77  | 73  | 65  | 61  | 54  | 76  | 77  | 90  | 59  |
| 45  | 53  | 45  | 63  | 76  | 67  | 69  | 89  | 89  | 59  |
| 62  | 61  | 45  | 52  | 59  | 69  | 66  | 54  | 66  | 48  |
| 44  | 51  | 47  | 51  | 69  | 59  | 66  | 56  | 63  | 50  |
| 59  | 66  | 55  | 101 | 158 | 124 | 171 | 143 | 166 | 75  |
| 41  | 47  | 56  | 77  | 76  | 109 | 97  | 125 | 101 | 65  |
| 24  | 25  | 33  | 134 | 177 | 151 | 178 | 154 | 181 | 58  |
| 14  | 14  | 18  | 21  | 43  | 35  | 25  | 22  | 23  | 14  |
| 150 | 163 | 177 | 149 | 207 | 169 | 191 | 187 | 214 | 166 |
| 14  | 14  | 19  | 23  | 17  | 17  | 19  | 15  | 14  | 18  |
| 62  | 50  | 68  | 49  | 72  | 62  | 65  | 58  | 57  | 43  |
| 41  | 50  | 40  | 171 | 236 | 200 | 175 | 141 | 167 | 79  |
| 39  | 42  | 43  | 47  | 52  | 43  | 52  | 33  | 67  | 42  |
| 67  | 86  | 85  | 116 | 159 | 122 | 154 | 149 | 189 | 123 |
| 20  | 36  | 38  | 66  | 93  | 68  | 67  | 58  | 69  | 39  |
| 55  | 54  | 56  | 36  | 43  | 28  | 41  | 28  | 36  | 31  |
| 22  | 27  | 21  | 79  | 102 | 73  | 101 | 91  | 101 | 40  |
| 0   | 0   | 0   | 0   | 0   | 0   | 0   | 1   | 1   | 0   |
| 30  | 20  | 30  | 42  | 46  | 49  | 54  | 41  | 46  | 28  |
| 34  | 22  | 40  | 23  | 40  | 40  | 34  | 17  | 39  | 23  |

|       |       |       |     |     |     |      |      |      |      |
|-------|-------|-------|-----|-----|-----|------|------|------|------|
| 36    | 39    | 46    | 21  | 30  | 26  | 29   | 44   | 27   | 40   |
| 50    | 43    | 46    | 48  | 55  | 45  | 68   | 66   | 67   | 39   |
| 33    | 24    | 31    | 31  | 32  | 26  | 54   | 39   | 52   | 32   |
| 18    | 24    | 36    | 62  | 55  | 39  | 37   | 33   | 29   | 33   |
| 41    | 38    | 32    | 32  | 76  | 55  | 66   | 53   | 71   | 37   |
| 68    | 70    | 51    | 87  | 94  | 76  | 102  | 108  | 122  | 60   |
| 43    | 53    | 48    | 50  | 62  | 38  | 75   | 77   | 78   | 48   |
| 39    | 37    | 64    | 78  | 94  | 95  | 97   | 109  | 130  | 61   |
| 16    | 19    | 16    | 24  | 28  | 28  | 22   | 24   | 28   | 22   |
| 29    | 23    | 40    | 40  | 56  | 33  | 45   | 28   | 50   | 26   |
| 33    | 43    | 31    | 37  | 30  | 45  | 48   | 43   | 43   | 36   |
| 35    | 39    | 38    | 114 | 142 | 132 | 125  | 114  | 122  | 45   |
| 48    | 42    | 51    | 65  | 78  | 72  | 71   | 51   | 71   | 53   |
| 9     | 19    | 19    | 18  | 24  | 17  | 12   | 14   | 10   | 13   |
| 22    | 22    | 26    | 29  | 39  | 25  | 33   | 36   | 34   | 18   |
| 14290 | 14192 | 14080 | 512 | 473 | 440 | 1581 | 1479 | 1811 | 9988 |
| 12107 | 12216 | 11418 | 450 | 364 | 384 | 1298 | 1239 | 1663 | 8183 |
| 13242 | 12958 | 12436 | 489 | 417 | 401 | 1449 | 1353 | 1778 | 9221 |
| 10568 | 10559 | 10380 | 389 | 322 | 348 | 1215 | 1142 | 1400 | 7580 |
| 11311 | 10975 | 9592  | 389 | 356 | 361 | 1153 | 1127 | 1486 | 7635 |
| 10141 | 10005 | 9209  | 374 | 342 | 315 | 1170 | 1047 | 1342 | 7187 |

| MPII_0.0    | MPII_0.0    | Peptide     | Substrate | Protein name |
|-------------|-------------|-------------|-----------|--------------|
| 4 $\mu$ M_2 | 4 $\mu$ M_3 | Sequence    |           |              |
| 20          | 28          | GASGGMGNK   | Controls  | NA           |
| 79          | 63          | TKIYNYDCEP  | Controls  | NA           |
| 56          | 85          | TKIYDYDCEP  | Controls  | NA           |
| 63          | 84          | TKIYDLDCEP  | Controls  | NA           |
| 30          | 35          | GASGGLGNK   | Controls  | NA           |
| 25          | 38          | GDTYRYIDYA  | Controls  | NA           |
| 35          | 33          | AGSGTDFYLK  | Controls  | NA           |
| 29          | 46          | EQKLISEEDL  | Controls  | NA           |
| 26          | 35          | TASGEYMPME  | Controls  | NA           |
| 27          | 27          | AYPYDVPDYA  | Controls  | NA           |
| 20          | 29          | GDYKDDDDK   | Controls  | NA           |
| 45          | 45          | AIPNPLLGLD  | Controls  | NA           |
| 17          | 23          | AIPPLPLLGLD | Controls  | NA           |
| 28          | 34          | AIPQPLLGLD  | Controls  | NA           |
| 52          | 57          | AIPNPLRGLD  | Controls  | NA           |
| 28          | 33          | AIPNPLLTLD  | Controls  | NA           |
| 52          | 80          | GHHHHHHHHA  | Controls  | NA           |
| 30          | 32          | GGPQGIPGQG  | Controls  | NA           |
| 35          | 50          | GFRNVINVC   | Controls  | NA           |
| 97          | 117         | GWICMCVVHG  | Controls  | NA           |
| 36          | 51          | GWICMWVHG   | Controls  | NA           |
| 102         | 113         | GWCCMCLVHG  | Controls  | NA           |
| 98          | 139         | GWCCMWLVHG  | Controls  | NA           |
| 19          | 11          | GAGGDLGFG   | Controls  | NA           |
| 49          | 41          | GYLGILGVVG  | Controls  | NA           |
| 25          | 38          | GALGDLGFVG  | Controls  | NA           |
| 20          | 38          | GTKSFHSCLG  | Controls  | NA           |
| 12          | 9           | GTFSFRSCLG  | Controls  | NA           |
| 21          | 32          | GGPYIVPGKG  | Controls  | NA           |
| 21          | 28          | GGPYVKPGKG  | Controls  | NA           |
| 18          | 32          | GYYVCYTSSG  | Controls  | NA           |
| 21          | 27          | GESKDPQRP   | Controls  | NA           |
| 30          | 42          | GPMWPEHPMG  | Controls  | NA           |
| 279         | 297         | GRCCFHFCHG  | Controls  | NA           |
| 114         | 105         | GRFMFHCKHG  | Controls  | NA           |
| 118         | 162         | GRCMYHSCHG  | Controls  | NA           |

|    |    |             |          |    |
|----|----|-------------|----------|----|
| 19 | 5  | PGPPGAIGPS  | Controls | NA |
| 28 | 29 | LGGGALGPGG  | Controls | NA |
| 33 | 34 | EDPTAASGGL  | Controls | NA |
| 41 | 36 | PGPSGKDGP   | Controls | NA |
| 47 | 32 | VPGAI PGGVP | Controls | NA |
| 34 | 44 | AI IGLMVGGV | Controls | NA |
| 34 | 42 | VGGAVVTGVT  | Controls | NA |
| 8  | 23 | PGPPGAAGTP  | Controls | NA |
| 23 | 29 | AGAAGKAGYP  | Controls | NA |
| 48 | 51 | IPGLGVGVGV  | Controls | NA |
| 20 | 25 | GSIAAATGFV  | Controls | NA |
| 17 | 16 | PGQPGSPGSP  | Controls | NA |
| 37 | 28 | PGPKGDKGEP  | Controls | NA |
| 21 | 23 | QGPPGKNGET  | Controls | NA |
| 33 | 38 | VGPPGSNGNP  | Controls | NA |
| 18 | 31 | SGPPGKDGT   | Controls | NA |
| 18 | 19 | AGAAGARGND  | Controls | NA |
| 81 | 80 | KFHPLHSKII  | Controls | NA |
| 18 | 27 | PGSPGYQGPP  | Controls | NA |
| 39 | 45 | FTSEDLVVQV  | Controls | NA |
| 21 | 49 | PGPAGQPGDK  | Controls | NA |
| 22 | 20 | PGPSGDQGAS  | Controls | NA |
| 45 | 62 | GFLMFKQGRC  | Controls | NA |
| 17 | 29 | GGPPGVAGPP  | Controls | NA |
| 25 | 40 | VGANPVQVEV  | Controls | NA |
| 29 | 42 | PVVHFFKNIV  | Controls | NA |
| 25 | 29 | PQGPKGDPGP  | Controls | NA |
| 42 | 43 | GGVVRGPRVV  | Controls | NA |
| 51 | 64 | VGAGVPGFGA  | Controls | NA |
| 51 | 61 | FLPRHRDTGI  | Controls | NA |
| 29 | 28 | TFPGALVPGG  | Controls | NA |
| 20 | 28 | LAAYRLEDTF  | Controls | NA |
| 89 | 96 | KQARLIMQAI  | Controls | NA |
| 38 | 51 | AARPGFGLSP  | Controls | NA |
| 72 | 95 | LKAYKSELEE  | Controls | NA |
| 8  | 12 | RTRDRLDEVK  | Controls | NA |
| 68 | 78 | RQWAGLVEKV  | Controls | NA |
| 37 | 27 | KGEYRTNPED  | Controls | NA |
| 33 | 28 | STSGGYIFYT  | Controls | NA |
| 51 | 71 | HIDDKAFENV  | Controls | NA |
| 39 | 51 | TVNENLENY   | Controls | NA |

|     |     |             |          |    |
|-----|-----|-------------|----------|----|
| 23  | 26  | LEVNELEKFD  | Controls | NA |
| 78  | 100 | ARVLGLETEH  | Controls | NA |
| 32  | 45  | GILDSIGRFF  | Controls | NA |
| 32  | 26  | GLNQMIVIEL  | Controls | NA |
| 18  | 27  | TNLENLYLQG  | Controls | NA |
| 84  | 108 | LVLHLSHNRI  | Controls | NA |
| 50  | 51  | NLVYMTGNP   | Controls | NA |
| 21  | 41  | IQAIELEDLL  | Controls | NA |
| 53  | 53  | NNPVPYWEVQ  | Controls | NA |
| 28  | 35  | WAPVGTREVE  | Controls | NA |
| 35  | 41  | DGPSGAEPPP  | Controls | NA |
| 18  | 34  | INFSYEVLTTP | Controls | NA |
| 31  | 39  | PPMLPDLTLE  | Controls | NA |
| 37  | 44  | KESVPISDTI  | Controls | NA |
| 39  | 45  | KLVFFAEDVG  | Controls | NA |
| 33  | 45  | PGPAGANGEK  | Controls | NA |
| 25  | 48  | PGPSGRDGLP  | Controls | NA |
| 26  | 21  | PEPQPYPGAP  | Controls | NA |
| 26  | 32  | GAI PGGVPGG | Controls | NA |
| 39  | 34  | PGVLGGLGAL  | Controls | NA |
| 123 | 133 | FVNQHLCGSH  | Controls | NA |
| 29  | 26  | PPGPGIQGDA  | Controls | NA |
| 4   | 13  | YDRDKLFGFC  | Controls | NA |
| 48  | 80  | EILCKLSLEG  | Controls | NA |
| 33  | 44  | PEGTSLQEES  | Controls | NA |
| 36  | 32  | GPFGGPQPGV  | Controls | NA |
| 34  | 35  | GIPGLGVGVG  | Controls | NA |
| 54  | 45  | GAGQFPLGGV  | Controls | NA |
| 17  | 16  | APPGAYPGAP  | Controls | NA |
| 8   | 20  | GAPAPGVYYPG | Controls | NA |
| 50  | 56  | EEPKKLRPPP  | Controls | NA |
| 58  | 71  | QGAHRLMWAK  | Controls | NA |
| 45  | 62  | GLPNGLTFDA  | Controls | NA |
| 62  | 67  | ATGRLDTRPF  | Controls | NA |
| 27  | 50  | TFLGNKYESC  | Controls | NA |
| 34  | 45  | FLGNKYESCT  | Controls | NA |
| 30  | 40  | IIGLMVGGVV  | Controls | NA |
| 25  | 29  | SGPPGRAGEP  | Controls | NA |
| 46  | 47  | AGPPGEKGEPP | Controls | NA |
| 12  | 22  | GPALAAAYRLE | Controls | NA |
| 51  | 50  | PELTPVVQDC  | Controls | NA |

|     |     |              |          |    |
|-----|-----|--------------|----------|----|
| 20  | 18  | HGVATVAEKT   | Controls | NA |
| 40  | 44  | RVPSGLPDLK   | Controls | NA |
| 18  | 29  | GPTVETLQPP   | Controls | NA |
| 13  | 18  | PAPGNASESE   | Controls | NA |
| 16  | 18  | GVVFSYNTGS   | Controls | NA |
| 33  | 32  | SSTAVIVSAR   | Controls | NA |
| 25  | 28  | FFSFLGEAFD   | Controls | NA |
| 40  | 59  | VLVVGSKTKE   | Controls | NA |
| 44  | 50  | KTKEGVVHGV   | Controls | NA |
| 58  | 76  | SEEGYQDYEP   | Controls | NA |
| 36  | 37  | EEGYQDYEP    | Controls | NA |
| 72  | 91  | AAVLRELRCV   | Controls | NA |
| 41  | 31  | NPVQPIGPQT   | Controls | NA |
| 35  | 51  | KMIDATDVGT   | Controls | NA |
| 57  | 80  | SCANPARNAW   | Controls | NA |
| 23  | 13  | WFFSQSLPIK   | Controls | NA |
| 47  | 67  | QITFYHFRQD   | Controls | NA |
| 19  | 27  | ASTHSLLF'TN  | Controls | NA |
| 41  | 58  | ENAHDGHLIG   | Controls | NA |
| 55  | 79  | DMMVYMICNW   | Controls | NA |
| 29  | 43  | QRKYRTAWAD   | Controls | NA |
| 90  | 107 | CEYMKVKPDW   | Controls | NA |
| 48  | 52  | PLHSEIHYTD   | Controls | NA |
| 22  | 31  | SANPNPVIIF   | Controls | NA |
| 31  | 52  | ASQPKWMMIG   | Controls | NA |
| 121 | 135 | PMIRYHMIEY   | Controls | NA |
| 15  | 20  | TLISEAYLNP   | Controls | NA |
| 69  | 102 | AKANHNKTHS   | Controls | NA |
| 37  | 41  | LPPWMWYNAN   | Controls | NA |
| 22  | 48  | PMELAPQVFC   | Controls | NA |
| 5   | 6   | EFSSMVPCSA   | Controls | NA |
| 61  | 91  | LEGWR'ITYTEW | Controls | NA |
| 35  | 51  | FQEHININKA   | Controls | NA |
| 20  | 24  | SPIVYPNPQC   | Controls | NA |
| 23  | 22  | RDHHNILIDS   | Controls | NA |
| 52  | 71  | IQLMNWYMWM   | Controls | NA |
| 63  | 64  | ERNKYVLCFP   | Controls | NA |
| 70  | 76  | HLYIWMGVLR   | Controls | NA |
| 12  | 13  | KNKKKYSDTG   | Controls | NA |
| 46  | 55  | QCVTYNGWAG   | Controls | NA |
| 65  | 56  | ATYSTIRWYF   | Controls | NA |



|     |     |            |          |    |
|-----|-----|------------|----------|----|
| 81  | 114 | DEYLDYCDRR | Controls | NA |
| 58  | 74  | RTVNWQKHTC | Controls | NA |
| 88  | 117 | PKGCDMNQCH | Controls | NA |
| 53  | 69  | LMQWRDEMSH | Controls | NA |
| 28  | 40  | AFGSEFTGAM | Controls | NA |
| 33  | 47  | QEFAQSCDIT | Controls | NA |
| 27  | 34  | VTEDGPFKDT | Controls | NA |
| 90  | 85  | MMKASYTSTC | Controls | NA |
| 56  | 68  | HKFMYGYQVG | Controls | NA |
| 8   | 23  | LQWGEGYGEA | Controls | NA |
| 71  | 61  | KRWRMAGKPT | Controls | NA |
| 81  | 86  | TSRKIYQCDE | Controls | NA |
| 56  | 66  | SWWMTRFTWK | Controls | NA |
| 51  | 47  | YGWKENVMPS | Controls | NA |
| 71  | 91  | CYKVDEEHND | Controls | NA |
| 92  | 109 | CCVFNTHGWG | Controls | NA |
| 36  | 45  | QDQEFREVRM | Controls | NA |
| 32  | 44  | DMAAFRIRIN | Controls | NA |
| 70  | 96  | KNMDHKMDNW | Controls | NA |
| 99  | 85  | TTNVISYLSV | Controls | NA |
| 37  | 48  | YIWFNVNNA  | Controls | NA |
| 56  | 66  | PLTNKARGCY | Controls | NA |
| 53  | 62  | DYCVDAQKPE | Controls | NA |
| 27  | 32  | RNDRTPMNEV | Controls | NA |
| 59  | 80  | SRDSAQRSIV | Controls | NA |
| 37  | 52  | AWNPREVQGP | Controls | NA |
| 6   | 16  | WRPYKSQLAN | Controls | NA |
| 41  | 42  | HGCYIMARNC | Controls | NA |
| 100 | 119 | VLIEFCVPHW | Controls | NA |
| 73  | 91  | NCFEMCIDSK | Controls | NA |
| 58  | 67  | HMTGKFDIWQ | Controls | NA |
| 45  | 51  | TDPGDSPWWQ | Controls | NA |
| 80  | 79  | FQYGFYPPN  | Controls | NA |
| 84  | 98  | VQDEHRQFMA | Controls | NA |
| 20  | 23  | MRRVMYFTFF | Controls | NA |
| 19  | 27  | IPPYNISKEN | Controls | NA |
| 36  | 58  | MRRWFPYEEI | Controls | NA |
| 73  | 91  | DIKERSMCIK | Controls | NA |
| 57  | 91  | AFMQIAEERQ | Controls | NA |
| 61  | 72  | APSEMKKFGF | Controls | NA |
| 41  | 49  | YERFPKDEGY | Controls | NA |

|     |     |             |          |    |
|-----|-----|-------------|----------|----|
| 30  | 20  | VEVVDSFNPG  | Controls | NA |
| 49  | 56  | FFCLVHHDNR  | Controls | NA |
| 103 | 121 | YIFDEDNMYE  | Controls | NA |
| 95  | 104 | VFWNRYNNRW  | Controls | NA |
| 46  | 54  | KANTQAYWDW  | Controls | NA |
| 42  | 39  | WGWVCWANMG  | Controls | NA |
| 34  | 61  | MVYIRAAFVF  | Controls | NA |
| 246 | 281 | YNHYKFLVGA  | Controls | NA |
| 70  | 82  | KIRYVKLYTP  | Controls | NA |
| 129 | 157 | LDFTQTKYCW  | Controls | NA |
| 66  | 63  | SHGFKINLRK  | Controls | NA |
| 58  | 58  | AHGVGRISRF  | Controls | NA |
| 65  | 82  | RRNQVKS IWM | Controls | NA |
| 84  | 100 | AMKRLVIQAN  | Controls | NA |
| 36  | 34  | GGVRMTMLKI  | Controls | NA |
| 94  | 154 | TEPCTMHQQH  | Controls | NA |
| 26  | 33  | RPKARWKVYI  | Controls | NA |
| 30  | 37  | GVA AISVDQA | Controls | NA |
| 75  | 85  | WWHGPPRVIF  | Controls | NA |
| 49  | 54  | KNHGYGSRNT  | Controls | NA |
| 134 | 167 | HQFYKHNWVC  | Controls | NA |
| 109 | 114 | AVNSWRGVPL  | Controls | NA |
| 49  | 58  | EFWSRTSQAL  | Controls | NA |
| 109 | 122 | CWIPALYKHS  | Controls | NA |
| 21  | 44  | WDSFEPRLNM  | Controls | NA |
| 37  | 46  | AWYYELQMWS  | Controls | NA |
| 33  | 46  | IRFTKTYEKN  | Controls | NA |
| 91  | 117 | DTDCYYRRYC  | Controls | NA |
| 56  | 46  | DDTHFFIWNF  | Controls | NA |
| 13  | 31  | HRSMYQSIPF  | Controls | NA |
| 124 | 169 | MEMYRWAGLD  | Controls | NA |
| 128 | 138 | CMCMNFGK VW | Controls | NA |
| 85  | 71  | QFKALSKK WY | Controls | NA |
| 30  | 40  | SGEETHDRMH  | Controls | NA |
| 126 | 152 | LARHSMRQGI  | Controls | NA |
| 19  | 36  | ADGECPYALC  | Controls | NA |
| 88  | 93  | WPDHYKCGWW  | Controls | NA |
| 51  | 66  | TTTCFGGVMC  | Controls | NA |
| 34  | 36  | WQDKYTTQWL  | Controls | NA |
| 67  | 52  | SADHTMFQLQ  | Controls | NA |
| 38  | 52  | PHTSADCGRQ  | Controls | NA |

|     |     |             |          |    |
|-----|-----|-------------|----------|----|
| 18  | 27  | ETWKLKCNCI  | Controls | NA |
| 21  | 19  | QPDLLNNPRTR | Controls | NA |
| 34  | 36  | QISRHDVEMD  | Controls | NA |
| 33  | 40  | NHGKIYPTLE  | Controls | NA |
| 37  | 38  | ARHLYREVKD  | Controls | NA |
| 62  | 71  | PQLNVGWFDK  | Controls | NA |
| 24  | 32  | GIYWYATFQN  | Controls | NA |
| 22  | 45  | ADMILKVIII  | Controls | NA |
| 37  | 55  | LEIPEYRAFD  | Controls | NA |
| 40  | 44  | TKAPHKAVYE  | Controls | NA |
| 52  | 62  | WCFEPEFDA   | Controls | NA |
| 25  | 37  | VNFIGNSSRS  | Controls | NA |
| 102 | 119 | PKFKCEFCAL  | Controls | NA |
| 58  | 66  | FGHKHNINLD  | Controls | NA |
| 29  | 31  | RSNCTVEEFF  | Controls | NA |
| 28  | 38  | KARAQMGCQR  | Controls | NA |
| 55  | 88  | LMFLCHEFCI  | Controls | NA |
| 9   | 5   | TSPTYLNLKG  | Controls | NA |
| 33  | 27  | FDNESPQNS   | Controls | NA |
| 17  | 41  | I IWSTSSLGH | Controls | NA |
| 54  | 64  | FRCYEFLKMI  | Controls | NA |
| 70  | 72  | YSGRQCDLHA  | Controls | NA |
| 44  | 47  | WNYKQNNKQT  | Controls | NA |
| 66  | 64  | MWASFLIPAD  | Controls | NA |
| 66  | 78  | PVDLLMFWIA  | Controls | NA |
| 129 | 162 | TGMALRGRDI  | Controls | NA |
| 67  | 72  | CKDRYDWSEY  | Controls | NA |
| 54  | 65  | QLSGSAPYCA  | Controls | NA |
| 32  | 36  | TAVIIKFKHF  | Controls | NA |
| 37  | 47  | DGAQWRKATP  | Controls | NA |
| 165 | 187 | YSIWHHQWHW  | Controls | NA |
| 105 | 120 | MINHYQQITY  | Controls | NA |
| 50  | 51  | NI IAAIVGTW | Controls | NA |
| 59  | 84  | WYETMLLFCT  | Controls | NA |
| 173 | 215 | PTRRTIEMHY  | Controls | NA |
| 29  | 40  | YFRNKAMSWC  | Controls | NA |
| 71  | 87  | FMEGASRVWW  | Controls | NA |
| 57  | 51  | FFGEQMGTDK  | Controls | NA |
| 66  | 81  | VENVQSWLDW  | Controls | NA |
| 65  | 64  | DVQIYFTGLW  | Controls | NA |
| 51  | 63  | KRFKAGRRES  | Controls | NA |

|     |     |            |          |    |
|-----|-----|------------|----------|----|
| 219 | 303 | YTMSRPYWHA | Controls | NA |
| 31  | 36  | YSGCSYDDCD | Controls | NA |
| 25  | 20  | GCISWNPVSH | Controls | NA |
| 68  | 75  | NRDKNHKRNP | Controls | NA |
| 35  | 29  | TDGMPEINKW | Controls | NA |
| 71  | 78  | KKLRNFKYTH | Controls | NA |
| 39  | 32  | GNVYVQTIIM | Controls | NA |
| 26  | 29  | KRNFGVWEKS | Controls | NA |
| 120 | 140 | PWTYCDEVAH | Controls | NA |
| 69  | 84  | WDYYRMVNYN | Controls | NA |
| 131 | 150 | TYEWHAEYCQ | Controls | NA |
| 105 | 113 | WVKFQYRYQH | Controls | NA |
| 37  | 40  | TVWHFMNTIC | Controls | NA |
| 12  | 8   | MAQDHNNKFN | Controls | NA |
| 38  | 28  | HLSKQMLQL  | Controls | NA |
| 30  | 35  | FDGYCSNPDQ | Controls | NA |
| 48  | 71  | GRCNQFSAWE | Controls | NA |
| 84  | 108 | YDYNCHYDPH | Controls | NA |
| 24  | 32  | LRFITMGYMF | Controls | NA |
| 64  | 103 | MHTIEWFASQ | Controls | NA |
| 54  | 64  | TTWMSWLRGI | Controls | NA |
| 57  | 76  | TLSRIKYPYH | Controls | NA |
| 67  | 89  | MQGWPHWKYI | Controls | NA |
| 88  | 107 | QVYYEHGRFY | Controls | NA |
| 159 | 187 | IRCLCRPPMV | Controls | NA |
| 45  | 49  | WQMQRDLTC  | Controls | NA |
| 44  | 44  | TSGMGNWQFQ | Controls | NA |
| 34  | 36  | EVHVNEVAPH | Controls | NA |
| 48  | 59  | IQAIQYQFQE | Controls | NA |
| 64  | 97  | HDDHYWMCV  | Controls | NA |
| 57  | 72  | PNSAYNPVRQ | Controls | NA |
| 82  | 106 | INTWHGFKWA | Controls | NA |
| 60  | 84  | PWYAQVGVRE | Controls | NA |
| 23  | 32  | SLITGFVGGD | Controls | NA |
| 27  | 18  | GGPGQWPEVP | Controls | NA |
| 51  | 75  | NFMTRDGPLV | Controls | NA |
| 54  | 73  | SMTTWRPYMK | Controls | NA |
| 63  | 61  | INIASCQAGS | Controls | NA |
| 102 | 110 | DLFCECTLRA | Controls | NA |
| 64  | 85  | EMTRMHIASL | Controls | NA |
| 102 | 125 | MFICIMRGQA | Controls | NA |

|     |     |             |          |    |
|-----|-----|-------------|----------|----|
| 79  | 97  | HIAHPLQMAN  | Controls | NA |
| 75  | 100 | THTFGWKCET  | Controls | NA |
| 46  | 49  | GKVYPQEYMS  | Controls | NA |
| 90  | 113 | AKQEYIKTEA  | Controls | NA |
| 36  | 40  | DSEEDRVKIT  | Controls | NA |
| 25  | 31  | WFTWEIFQVI  | Controls | NA |
| 26  | 35  | EADSVYTAVY  | Controls | NA |
| 85  | 85  | QDQRWPNRAR  | Controls | NA |
| 188 | 247 | KTMVYWHVRH  | Controls | NA |
| 30  | 33  | EATCRSGSKE  | Controls | NA |
| 33  | 40  | SPQKGMNWP   | Controls | NA |
| 36  | 29  | IEDMGGLILT  | Controls | NA |
| 52  | 51  | KEAYRNNKEK  | Controls | NA |
| 28  | 30  | TPANNSLSGE  | Controls | NA |
| 143 | 165 | IHHSTCQRMA  | Controls | NA |
| 62  | 66  | ANKVIHSAMN  | Controls | NA |
| 29  | 40  | WTPGYGNCMK  | Controls | NA |
| 39  | 47  | VWASWIVSQY  | Controls | NA |
| 35  | 35  | YMRSCKNKCT  | Controls | NA |
| 89  | 126 | WTKTAFETGH  | Controls | NA |
| 109 | 122 | LIKWKMPYPF  | Controls | NA |
| 51  | 52  | KRYHISGEIT  | Controls | NA |
| 93  | 101 | KMKDVNDEIC  | Controls | NA |
| 78  | 99  | EEGYINHPAV  | Controls | NA |
| 43  | 42  | IWRPAYISVF  | Controls | NA |
| 78  | 85  | NVFRTHECKD  | Controls | NA |
| 57  | 60  | IDVPKLDWKC  | Controls | NA |
| 52  | 45  | AIDEFDDDHV  | Controls | NA |
| 76  | 88  | EYTWHNHAHN  | Controls | NA |
| 26  | 26  | KVQNTNDSPA  | Controls | NA |
| 89  | 87  | HLVNCAYNQ   | Controls | NA |
| 86  | 114 | WSPGRWTLA   | Controls | NA |
| 42  | 42  | NKNMDQTKIG  | Controls | NA |
| 25  | 34  | QYLFNNSYLQ  | Controls | NA |
| 58  | 51  | LVTAHNWFYFK | Controls | NA |
| 69  | 97  | KFHRWRSFWL  | Controls | NA |
| 40  | 52  | AHNTSWHWII  | Controls | NA |
| 95  | 108 | DFVSCVMYNW  | Controls | NA |
| 65  | 77  | NFQFRKVMVV  | Controls | NA |
| 39  | 45  | GNRLLGWVMI  | Controls | NA |
| 19  | 29  | SPKFSHTWRI  | Controls | NA |

|     |     |             |          |    |
|-----|-----|-------------|----------|----|
| 50  | 43  | YVSAHLTPFA  | Controls | NA |
| 35  | 43  | VLDKPTMNTP  | Controls | NA |
| 28  | 29  | TAMAFAMMFD  | Controls | NA |
| 69  | 66  | HVPYDKQFEH  | Controls | NA |
| 72  | 100 | CVPWPEFRDP  | Controls | NA |
| 55  | 61  | RNSMQCSSMW  | Controls | NA |
| 86  | 87  | WFDELYQKVP  | Controls | NA |
| 60  | 66  | MTNAEYIGAA  | Controls | NA |
| 43  | 60  | DWDSTRQYIY  | Controls | NA |
| 29  | 27  | YFNFATWDSW  | Controls | NA |
| 47  | 56  | NPLWWQENMM  | Controls | NA |
| 57  | 53  | EMKWLFIISGY | Controls | NA |
| 105 | 147 | MCNPPLPWFG  | Controls | NA |
| 86  | 124 | EKWMDLIYDR  | Controls | NA |
| 34  | 34  | QISAVMIVYF  | Controls | NA |
| 62  | 49  | CIAKAQAVFL  | Controls | NA |
| 73  | 95  | MALLYANYWQ  | Controls | NA |
| 17  | 28  | SFGFTKCNNI  | Controls | NA |
| 81  | 89  | FSVMGWTKCD  | Controls | NA |
| 75  | 85  | EKFEHCPKVF  | Controls | NA |
| 49  | 67  | FPAFIICDLD  | Controls | NA |
| 40  | 38  | GEGPFMPAMS  | Controls | NA |
| 40  | 45  | GTQMDTATMP  | Controls | NA |
| 89  | 109 | LKTDSVNLEP  | Controls | NA |
| 69  | 60  | WPMWSFPATK  | Controls | NA |
| 42  | 72  | MVKPIYWAAI  | Controls | NA |
| 74  | 79  | WPMFLTNFIL  | Controls | NA |
| 54  | 77  | KDYIFFVHIT  | Controls | NA |
| 39  | 43  | NNDVRHSVVN  | Controls | NA |
| 73  | 56  | RLELGLTMLY  | Controls | NA |
| 87  | 109 | FNHREYMGGW  | Controls | NA |
| 46  | 53  | WLDDNQRMML  | Controls | NA |
| 69  | 74  | FKFFSALTWD  | Controls | NA |
| 42  | 50  | WIRFEVMQPT  | Controls | NA |
| 50  | 42  | SYPLRQTYCR  | Controls | NA |
| 73  | 94  | EHPMRCTGT   | Controls | NA |
| 74  | 109 | FEWVASKACQ  | Controls | NA |
| 79  | 106 | LYFDNPMSNE  | Controls | NA |
| 17  | 21  | VMGCWIIWMR  | Controls | NA |
| 143 | 190 | IWWHCHKDQC  | Controls | NA |
| 47  | 63  | QWCMEFWMPC  | Controls | NA |

|     |     |             |          |    |
|-----|-----|-------------|----------|----|
| 70  | 77  | TIQTACNDGL  | Controls | NA |
| 40  | 49  | PQSIIRVIFM  | Controls | NA |
| 48  | 49  | LPNRVGHAMT  | Controls | NA |
| 171 | 166 | IINCKQCAHM  | Controls | NA |
| 124 | 159 | HIHCGLINAT  | Controls | NA |
| 120 | 131 | VCRVQGYHLV  | Controls | NA |
| 14  | 16  | ARYYSTMIIR  | Controls | NA |
| 81  | 78  | NRQNI SDNHI | Controls | NA |
| 93  | 92  | LINKRMWILK  | Controls | NA |
| 75  | 100 | CMHRQILNHG  | Controls | NA |
| 61  | 90  | LSEEAVNCRF  | Controls | NA |
| 79  | 93  | QKPLVNP MCS | Controls | NA |
| 38  | 73  | PIYWVKRPSK  | Controls | NA |
| 82  | 97  | RKGYNFYCLY  | Controls | NA |
| 25  | 41  | IQQVAQNCPI  | Controls | NA |
| 34  | 46  | LCRTCTWQTC  | Controls | NA |
| 57  | 60  | GVDFLSLWHK  | Controls | NA |
| 95  | 107 | DYPHPQDLVG  | Controls | NA |
| 25  | 26  | TIGANNNI IA | Controls | NA |
| 37  | 38  | PRPWVQYDFI  | Controls | NA |
| 141 | 138 | WTTREAWRAL  | Controls | NA |
| 45  | 66  | DFSMGGCVWL  | Controls | NA |
| 68  | 58  | WVNKDQEFIQ  | Controls | NA |
| 105 | 124 | TWIRWAGAVC  | Controls | NA |
| 46  | 61  | FCVMPMAMAV  | Controls | NA |
| 95  | 120 | QCWYYKQITV  | Controls | NA |
| 118 | 137 | CLPMLGHS HF | Controls | NA |
| 17  | 22  | KICEEMMKKP  | Controls | NA |
| 110 | 164 | FICPHDCQAM  | Controls | NA |
| 79  | 97  | NWRHGEIGDH  | Controls | NA |
| 88  | 112 | SNLWCNNIRA  | Controls | NA |
| 9   | 24  | TRALNCAWHN  | Controls | NA |
| 69  | 90  | CPWIYSHPAK  | Controls | NA |
| 72  | 66  | WQKERITGYH  | Controls | NA |
| 91  | 97  | WYGMHEWIMS  | Controls | NA |
| 39  | 36  | WMVRRFCDKA  | Controls | NA |
| 45  | 63  | KADVIGRDRV  | Controls | NA |
| 183 | 275 | FRWCGFDHIA  | Controls | NA |
| 33  | 34  | QQTRGPAEHG  | Controls | NA |
| 18  | 48  | LRHLYGDTEL  | Controls | NA |
| 80  | 99  | NSPEMHK PW  | Controls | NA |

|     |     |                     |          |    |
|-----|-----|---------------------|----------|----|
| 41  | 37  | AWECKLLMRL          | Controls | NA |
| 15  | 22  | NDNFDGVLLM          | Controls | NA |
| 41  | 46  | WRPRFVTFWH          | Controls | NA |
| 41  | 62  | TMPRQAGENL          | Controls | NA |
| 31  | 47  | YWYEQVWWYK          | Controls | NA |
| 45  | 74  | GWMLTCNIEF          | Controls | NA |
| 40  | 58  | LPKSI IHPGD         | Controls | NA |
| 114 | 161 | CKCHCWMIHL          | Controls | NA |
| 43  | 68  | HSLMNSWEFR          | Controls | NA |
| 37  | 30  | QDYRFQITSE          | Controls | NA |
| 49  | 64  | KSAIEV I IYM        | Controls | NA |
| 10  | 23  | MCLTCSWHLY          | Controls | NA |
| 85  | 95  | QQEMHYIVLG          | Controls | NA |
| 89  | 113 | VSYNYTDCRH          | Controls | NA |
| 47  | 55  | WIVLMDGKEP          | Controls | NA |
| 100 | 120 | MNMKLYERFR          | Controls | NA |
| 44  | 79  | EEEFIVLDEM          | Controls | NA |
| 74  | 87  | FNELTIPFNA          | Controls | NA |
| 28  | 53  | EEPRPERTHV          | Controls | NA |
| 92  | 115 | SHCWIDILCT          | Controls | NA |
| 46  | 41  | PLVTLWWTAF          | Controls | NA |
| 75  | 89  | PEKYRVPVNW          | Controls | NA |
| 106 | 115 | VFPHHSQHWG          | Controls | NA |
| 142 | 152 | FWPEHSRVLC          | Controls | NA |
| 18  | 17  | FTYYAQSSQF          | Controls | NA |
| 53  | 70  | F I P I H N G F F L | Controls | NA |
| 50  | 51  | SFLTFWIDNM          | Controls | NA |
| 69  | 84  | DTRFRQKVS           | Controls | NA |
| 67  | 72  | KNANMEHSYV          | Controls | NA |
| 38  | 38  | GETCLQSDNV          | Controls | NA |
| 36  | 47  | WTPPEAHSSR          | Controls | NA |
| 33  | 50  | PTHINDSAFD          | Controls | NA |
| 54  | 65  | TFYHI IALGH         | Controls | NA |
| 64  | 78  | EPNWDASMHH          | Controls | NA |
| 66  | 72  | RQYMPTIFAK          | Controls | NA |
| 165 | 187 | PFRHDKTWRL          | Controls | NA |
| 88  | 107 | RMHACKLYKM          | Controls | NA |
| 101 | 114 | VAMVTHQYQG          | Controls | NA |
| 81  | 91  | RPRWAYLIWQ          | Controls | NA |
| 27  | 34  | HDWAYASFLY          | Controls | NA |
| 34  | 53  | FFWINVNAMV          | Controls | NA |



|     |     |             |          |    |
|-----|-----|-------------|----------|----|
| 84  | 82  | NMGIYRCNGF  | Controls | NA |
| 29  | 39  | YKTHCQLDFC  | Controls | NA |
| 44  | 45  | SVPQPCWVFM  | Controls | NA |
| 23  | 26  | EAFSGAPIPP  | Controls | NA |
| 75  | 78  | HQYCHQGSNG  | Controls | NA |
| 48  | 62  | DICNVYGWGE  | Controls | NA |
| 62  | 67  | AWGMSMGLSE  | Controls | NA |
| 27  | 26  | RVDIYQFPND  | Controls | NA |
| 41  | 46  | YDAGSPMLNV  | Controls | NA |
| 50  | 62  | MTNMAHPTEN  | Controls | NA |
| 46  | 59  | TIIIFVEKMEP | Controls | NA |
| 76  | 69  | MIQVWPSYQE  | Controls | NA |
| 140 | 155 | KMKYASYPLI  | Controls | NA |
| 34  | 52  | GIQWEQWTKF  | Controls | NA |
| 58  | 95  | EVGQHTCPQM  | Controls | NA |
| 40  | 47  | CQNCTQPTH   | Controls | NA |
| 88  | 90  | MNHTMPIDTW  | Controls | NA |
| 32  | 23  | PRNGNRKWL   | Controls | NA |
| 153 | 165 | TKHCLARSGP  | Controls | NA |
| 43  | 80  | QIHTMDFWNN  | Controls | NA |
| 79  | 109 | IPMRMKHHVD  | Controls | NA |
| 60  | 64  | TNYTICPSGH  | Controls | NA |
| 166 | 183 | EEYQYLRKYA  | Controls | NA |
| 64  | 102 | LVFEEDHWVP  | Controls | NA |
| 23  | 41  | IQLPVFDHIN  | Controls | NA |
| 46  | 63  | QLAAQRFPAS  | Controls | NA |
| 13  | 13  | DCEPQSANKK  | Controls | NA |
| 37  | 46  | TWPALVRTLS  | Controls | NA |
| 33  | 45  | KLFMIWVVEH  | Controls | NA |
| 41  | 46  | LIWEGVRVEK  | Controls | NA |
| 87  | 85  | QHCECPIMKK  | Controls | NA |
| 25  | 30  | PTCEAYINAD  | Controls | NA |
| 41  | 38  | QQFDSNGAWY  | Controls | NA |
| 29  | 28  | LVESHKLTIS  | Controls | NA |
| 119 | 110 | QSVVMHYGLM  | Controls | NA |
| 65  | 68  | YRMLNEPLDS  | Controls | NA |
| 11  | 17  | FLLRLPKKYF  | Controls | NA |
| 80  | 103 | WCAHNYLRMP  | Controls | NA |
| 42  | 44  | PAIGWIGLSR  | Controls | NA |
| 15  | 23  | PMGAACFRFQ  | Controls | NA |
| 83  | 105 | FCCDWFPNKR  | Controls | NA |

|     |     |            |          |    |
|-----|-----|------------|----------|----|
| 50  | 47  | RSKNHRQVVH | Controls | NA |
| 62  | 92  | PKWDATVNAH | Controls | NA |
| 145 | 168 | SRWMNINQRL | Controls | NA |
| 49  | 64  | HFDCCTPIEI | Controls | NA |
| 89  | 90  | WSQYPSVMDK | Controls | NA |
| 50  | 59  | IVHLRAYIIN | Controls | NA |
| 226 | 287 | MLRTRDHHEP | Controls | NA |
| 55  | 78  | IYQVQIDTLY | Controls | NA |
| 9   | 23  | FSRKKHNFPP | Controls | NA |
| 35  | 43  | SIGYTWNKYA | Controls | NA |
| 48  | 55  | RGWQCERWKL | Controls | NA |
| 20  | 26  | HLRNLSEVHS | Controls | NA |
| 15  | 18  | NFELFFLPKY | Controls | NA |
| 40  | 61  | KKYSQLFVTI | Controls | NA |
| 27  | 53  | WVGCLDFNKF | Controls | NA |
| 35  | 44  | PHLVNYYSHS | Controls | NA |
| 50  | 83  | WKWTYNQATT | Controls | NA |
| 52  | 67  | GCRQWGRWKF | Controls | NA |
| 30  | 46  | IVFNATGLEE | Controls | NA |
| 152 | 180 | HTWQSGYHGH | Controls | NA |
| 31  | 51  | RDMVGNEPGD | Controls | NA |
| 44  | 43  | LRKAMGFKFQ | Controls | NA |
| 167 | 203 | PEWSLRAFWQ | Controls | NA |
| 311 | 368 | HHTCYNNSRW | Controls | NA |
| 30  | 47  | HNGKYTRFAF | Controls | NA |
| 55  | 48  | WLWRWPPFYL | Controls | NA |
| 66  | 83  | KPYCSGAVAK | Controls | NA |
| 59  | 70  | YQKAQMNDVP | Controls | NA |
| 43  | 61  | FCVVTKMCFK | Controls | NA |
| 49  | 48  | FQLTFESIMA | Controls | NA |
| 44  | 49  | QHKNQGRWLE | Controls | NA |
| 113 | 125 | VCYHHWMILT | Controls | NA |
| 32  | 38  | TFVNGGKTCV | Controls | NA |
| 137 | 191 | ADGMCFHLFN | Controls | NA |
| 63  | 54  | YEMFWVCMEP | Controls | NA |
| 17  | 29  | RGSEMGGFWY | Controls | NA |
| 56  | 121 | VWWTDLARWE | Controls | NA |
| 81  | 118 | CWEQWMHNCG | Controls | NA |
| 140 | 214 | YIRKQCQHKH | Controls | NA |
| 62  | 63  | WHVGPKYNNL | Controls | NA |
| 59  | 83  | NPCAWTCYQE | Controls | NA |

|     |     |            |          |    |
|-----|-----|------------|----------|----|
| 34  | 61  | NYYYVAQIMI | Controls | NA |
| 67  | 62  | DMKGQQLWIP | Controls | NA |
| 53  | 47  | DEWYVKARMG | Controls | NA |
| 21  | 36  | NAGMISGFFV | Controls | NA |
| 72  | 72  | KWYMEYPLQI | Controls | NA |
| 26  | 36  | WHMWLQVAWK | Controls | NA |
| 58  | 62  | NSKHYAQREF | Controls | NA |
| 19  | 22  | QRVAFKPGYD | Controls | NA |
| 34  | 52  | GLNDDKSWYY | Controls | NA |
| 87  | 102 | GMKEPCAIHT | Controls | NA |
| 61  | 100 | IRDYRMGQTW | Controls | NA |
| 48  | 58  | SQVHWSQKF  | Controls | NA |
| 63  | 92  | QFMIPGVWQL | Controls | NA |
| 97  | 144 | FTCVCKQIYA | Controls | NA |
| 80  | 91  | CERVREIHP  | Controls | NA |
| 31  | 26  | FGWSWVDFMC | Controls | NA |
| 23  | 30  | HLLSLEGNND | Controls | NA |
| 73  | 93  | MIGRECEWSI | Controls | NA |
| 17  | 20  | CGKVFVWVAR | Controls | NA |
| 47  | 59  | KIKGLLIKTK | Controls | NA |
| 69  | 81  | FEEVRRHQSA | Controls | NA |
| 65  | 74  | ETWVIVCKFD | Controls | NA |
| 78  | 99  | WFGASGRKIL | Controls | NA |
| 165 | 196 | LKAWNCICRR | Controls | NA |
| 31  | 52  | PSFTCISNAS | Controls | NA |
| 48  | 31  | SADLKVMGKK | Controls | NA |
| 21  | 21  | YDMFPCTCGN | Controls | NA |
| 32  | 53  | IDWIYWQCTL | Controls | NA |
| 25  | 34  | CVNSPMRYDI | Controls | NA |
| 69  | 96  | RAMWHRKVHR | Controls | NA |
| 118 | 128 | LPHYEHGIMA | Controls | NA |
| 24  | 33  | SYVDIKRSER | Controls | NA |
| 36  | 64  | IVDQVGEMDD | Controls | NA |
| 37  | 52  | WNRMEVNQPI | Controls | NA |
| 23  | 31  | TMNAPDFLRG | Controls | NA |
| 159 | 168 | TNWSDRLPYQ | Controls | NA |
| 79  | 82  | YELHTMEYEM | Controls | NA |
| 195 | 227 | YMHPNMYLFQ | Controls | NA |
| 49  | 81  | KIPASNHQIW | Controls | NA |
| 32  | 31  | ATMNYSYAIR | Controls | NA |
| 13  | 27  | NGVEKVKMCR | Controls | NA |

|     |     |            |          |    |
|-----|-----|------------|----------|----|
| 177 | 188 | VGDHKYPHQW | Controls | NA |
| 81  | 101 | VRHLLSAMDW | Controls | NA |
| 64  | 77  | CHFMIASYPN | Controls | NA |
| 49  | 58  | IWKGAGGDEN | Controls | NA |
| 64  | 49  | MTITFFKFHS | Controls | NA |
| 88  | 81  | PFAEWPTRE  | Controls | NA |
| 52  | 63  | CCGKASQKDM | Controls | NA |
| 43  | 69  | VGIRVFFELC | Controls | NA |
| 54  | 83  | KVLDQSIQKW | Controls | NA |
| 39  | 40  | RVMGQEQHIE | Controls | NA |
| 73  | 75  | KVDNCGEVHV | Controls | NA |
| 89  | 138 | LQKHYWEFKP | Controls | NA |
| 35  | 38  | IMGLRWEMIW | Controls | NA |
| 43  | 37  | LEMTMQSPHN | Controls | NA |
| 63  | 79  | DCCIMAFVD  | Controls | NA |
| 33  | 47  | KVKSIQPDHK | Controls | NA |
| 147 | 206 | IKYCHSLHSP | Controls | NA |
| 73  | 66  | VEKALADCNR | Controls | NA |
| 29  | 32  | QLAQGIIPFT | Controls | NA |
| 32  | 44  | YVDINVVKT  | Controls | NA |
| 74  | 74  | FVGPIFKCKT | Controls | NA |
| 93  | 106 | DHIQDGWKHH | Controls | NA |
| 85  | 98  | VVIQKWPTKR | Controls | NA |
| 20  | 24  | AWTPWGDYDN | Controls | NA |
| 77  | 77  | PGELYDFLRP | Controls | NA |
| 40  | 63  | LHFDSWSGFK | Controls | NA |
| 84  | 105 | QFALTAKFAR | Controls | NA |
| 26  | 36  | YWFDYCSITL | Controls | NA |
| 47  | 41  | PRDIESWHTQ | Controls | NA |
| 41  | 40  | NPQSDVKAVT | Controls | NA |
| 203 | 245 | YQEPCLICH  | Controls | NA |
| 33  | 23  | GVCWLGMWVI | Controls | NA |
| 36  | 44  | IAIDTWYGDI | Controls | NA |
| 31  | 26  | QDFTWRIEFD | Controls | NA |
| 10  | 9   | WLARLFWMHC | Controls | NA |
| 29  | 30  | ASTVTKGKTI | Controls | NA |
| 13  | 25  | VIQDCAKDME | Controls | NA |
| 237 | 272 | FHYHVHWPWY | Controls | NA |
| 117 | 131 | NDWRWCLLWR | Controls | NA |
| 78  | 69  | GPKRNKLSR  | Controls | NA |
| 22  | 35  | MQLRWWFCSF | Controls | NA |

|     |     |            |          |    |
|-----|-----|------------|----------|----|
| 77  | 95  | TACYMKHLKV | Controls | NA |
| 40  | 54  | RHFPGSLAIE | Controls | NA |
| 73  | 76  | KSINQIVYFA | Controls | NA |
| 40  | 47  | MRQFSNHKHC | Controls | NA |
| 84  | 90  | QKQIRLPRDR | Controls | NA |
| 57  | 74  | GFWPQMEMAQ | Controls | NA |
| 61  | 73  | GGFERRSVFA | Controls | NA |
| 50  | 63  | AYPKRVKPVH | Controls | NA |
| 18  | 32  | CADDTDDLPN | Controls | NA |
| 70  | 133 | QAMMFMLPLL | Controls | NA |
| 95  | 117 | RKWRFIDEDW | Controls | NA |
| 37  | 43  | RDTQYYYNSE | Controls | NA |
| 16  | 30  | APNSLLNSTP | Controls | NA |
| 30  | 49  | FGIMKWRSGE | Controls | NA |
| 182 | 237 | PWCWLHTFCK | Controls | NA |
| 60  | 71  | CKRFDIQVTV | Controls | NA |
| 98  | 94  | TGNGNWyNRW | Controls | NA |
| 50  | 55  | LMNMGDIGDP | Controls | NA |
| 61  | 67  | NTGSTATFRP | Controls | NA |
| 76  | 100 | IWQNAAWVWQ | Controls | NA |
| 66  | 77  | DNIWGLLQYF | Controls | NA |
| 50  | 57  | TRDKMQEVCE | Controls | NA |
| 8   | 3   | LRNTGKNGSE | Controls | NA |
| 40  | 44  | MGTVWARLWL | Controls | NA |
| 39  | 42  | KYFMTYMQEM | Controls | NA |
| 85  | 102 | NILERVVHRP | Controls | NA |
| 62  | 65  | MCITSIHSEE | Controls | NA |
| 104 | 139 | VVGSTDGHSA | Controls | NA |
| 11  | 19  | NCYYTGPEQW | Controls | NA |
| 32  | 26  | VNGPGHMRDI | Controls | NA |
| 28  | 38  | FRNVQTNQOM | Controls | NA |
| 26  | 25  | NSNGIYFIFL | Controls | NA |
| 30  | 29  | THTSNRDSDR | Controls | NA |
| 13  | 13  | NTRRKMPNPN | Controls | NA |
| 31  | 45  | YAIMPGPKGD | Controls | NA |
| 54  | 67  | QFGLYGYSIL | Controls | NA |
| 34  | 49  | GEYWLTfGLD | Controls | NA |
| 22  | 29  | SQADQMTPGY | Controls | NA |
| 12  | 18  | VWFESLQPVE | Controls | NA |
| 37  | 46  | RCLQHPTRAA | Controls | NA |
| 36  | 56  | PVRFWKPKFT | Controls | NA |

|     |     |             |          |    |
|-----|-----|-------------|----------|----|
| 71  | 125 | KVDSALRNGI  | Controls | NA |
| 112 | 136 | DCTVMHGVSR  | Controls | NA |
| 47  | 68  | FKYAPGVWKW  | Controls | NA |
| 21  | 24  | GHNGIPCFCE  | Controls | NA |
| 45  | 41  | EGEKIPHVAA  | Controls | NA |
| 94  | 93  | MNQLMSPQPQ  | Controls | NA |
| 102 | 104 | MYTQYREMRV  | Controls | NA |
| 80  | 102 | VRVIMNWGVA  | Controls | NA |
| 45  | 49  | AEEEEKQPKKW | Controls | NA |
| 37  | 29  | NGGCQGIVAR  | Controls | NA |
| 42  | 63  | IAQKPTGRQF  | Controls | NA |
| 63  | 58  | IPMYGAWWFL  | Controls | NA |
| 92  | 112 | AFERDYKVDE  | Controls | NA |
| 133 | 167 | FKNMCCMFIM  | Controls | NA |
| 50  | 77  | QGDTFQKLPC  | Controls | NA |
| 30  | 16  | GKRMGVDILC  | Controls | NA |
| 145 | 167 | CKHRELRAYD  | Controls | NA |
| 34  | 52  | SQSELDEHPW  | Controls | NA |
| 74  | 101 | QDRWHTFAAY  | Controls | NA |
| 55  | 77  | SFRSIAFLMI  | Controls | NA |
| 18  | 32  | VLDWFKCSGM  | Controls | NA |
| 73  | 80  | NRLVYCVMMP  | Controls | NA |
| 50  | 70  | MNESPRQSED  | Controls | NA |
| 17  | 29  | WCAVRWMLFT  | Controls | NA |
| 47  | 58  | PEKEAHLFRD  | Controls | NA |
| 33  | 41  | VSRDPTFFIL  | Controls | NA |
| 42  | 50  | AMGTICWLCT  | Controls | NA |
| 38  | 43  | NYQDFDITCN  | Controls | NA |
| 47  | 53  | SGWPGQQAGL  | Controls | NA |
| 57  | 50  | IQDYDRVGWW  | Controls | NA |
| 45  | 54  | FPIEMETKVA  | Controls | NA |
| 41  | 52  | GYAYLHGIMC  | Controls | NA |
| 81  | 93  | MLIFDVDDRP  | Controls | NA |
| 120 | 132 | YGYHWNIRAV  | Controls | NA |
| 58  | 80  | SDCPVENIRG  | Controls | NA |
| 100 | 112 | FQYGCRRMGC  | Controls | NA |
| 36  | 51  | PGVDFTIKLD  | Controls | NA |
| 85  | 90  | QMQDNMPICW  | Controls | NA |
| 42  | 57  | PWPMVTTHAQ  | Controls | NA |
| 192 | 236 | WKHCDYAMQA  | Controls | NA |
| 55  | 62  | ENTEAAATCTF | Controls | NA |

|     |     |            |          |    |
|-----|-----|------------|----------|----|
| 250 | 273 | MPVYAIEHFH | Controls | NA |
| 69  | 66  | ICKCTLQASF | Controls | NA |
| 68  | 57  | VWPSQFRKGM | Controls | NA |
| 69  | 69  | CNVMTTEWAY | Controls | NA |
| 42  | 80  | GFIWYHPKIT | Controls | NA |
| 79  | 85  | RALRHWMCLA | Controls | NA |
| 56  | 71  | YGGKDMRCWP | Controls | NA |
| 36  | 36  | SQPEDNAFAP | Controls | NA |
| 48  | 47  | RYKLYCFYGP | Controls | NA |
| 78  | 83  | QIDDCDAHNM | Controls | NA |
| 47  | 54  | WFYNDWSFYN | Controls | NA |
| 154 | 238 | MDCTVDWHYK | Controls | NA |
| 59  | 71  | CCCSDPFYNP | Controls | NA |
| 30  | 36  | VWADMEKEMC | Controls | NA |
| 67  | 87  | ADRANWVCPA | Controls | NA |
| 63  | 78  | REAPTCYDRA | Controls | NA |
| 40  | 29  | LVDNAMASTN | Controls | NA |
| 52  | 49  | RQKTPYHADG | Controls | NA |
| 145 | 176 | PCVSHLFWDH | Controls | NA |
| 231 | 273 | GHWMVHRCSA | Controls | NA |
| 46  | 88  | YAGWRVSYAT | Controls | NA |
| 75  | 79  | CHLGIEEVRE | Controls | NA |
| 50  | 74  | DCEWLWWGTI | Controls | NA |
| 13  | 25  | FESFDCQIPG | Controls | NA |
| 63  | 89  | DPADRMRCRF | Controls | NA |
| 23  | 35  | MRRIDKYIMF | Controls | NA |
| 40  | 47  | WMRVIKHELN | Controls | NA |
| 122 | 168 | CDFFEHWFEA | Controls | NA |
| 58  | 64  | DGKKWECLGH | Controls | NA |
| 57  | 53  | QQPIRFVIRN | Controls | NA |
| 47  | 52  | YNPIQLKWET | Controls | NA |
| 48  | 63  | IHSDQTRGVA | Controls | NA |
| 81  | 120 | KRQSATARIM | Controls | NA |
| 9   | 17  | QSHITEECFF | Controls | NA |
| 24  | 24  | VSSELYNPYW | Controls | NA |
| 106 | 113 | MWIGLKYGFK | Controls | NA |
| 75  | 108 | LEYMSMLYDM | Controls | NA |
| 54  | 74  | NYFAAHLNAS | Controls | NA |
| 147 | 162 | QQHHWQMFCS | Controls | NA |
| 76  | 65  | CQSQRKSLHI | Controls | NA |
| 40  | 58  | CASKRRNTLG | Controls | NA |

|     |     |            |          |    |
|-----|-----|------------|----------|----|
| 116 | 147 | IPHYENYLLH | Controls | NA |
| 57  | 97  | SRCVFRVAIV | Controls | NA |
| 120 | 139 | GCQGDWCRRS | Controls | NA |
| 51  | 63  | FSDTLRAYVM | Controls | NA |
| 19  | 22  | YGFADSGRY  | Controls | NA |
| 38  | 26  | EKKNYDMVSL | Controls | NA |
| 108 | 139 | ATQAWMIVPF | Controls | NA |
| 90  | 98  | IENAKKQRQL | Controls | NA |
| 14  | 23  | RPYKYIPMTG | Controls | NA |
| 22  | 20  | IPASSKGESM | Controls | NA |
| 82  | 104 | LGLVQYICFH | Controls | NA |
| 52  | 64  | FVVWRPAAWC | Controls | NA |
| 129 | 161 | FPSSRFHYGL | Controls | NA |
| 33  | 30  | DFHGWNNGEA | Controls | NA |
| 5   | 6   | KLLGWGSCKF | Controls | NA |
| 76  | 94  | FNVPFGPCQI | Controls | NA |
| 88  | 96  | KQVPCFRYTA | Controls | NA |
| 35  | 36  | YGGMEMGRMY | Controls | NA |
| 73  | 79  | KILFMRGDML | Controls | NA |
| 135 | 172 | MHWPDCPMSW | Controls | NA |
| 91  | 96  | PDCFTWIRWL | Controls | NA |
| 32  | 50  | IELMRWWTFC | Controls | NA |
| 170 | 212 | CDHYVHGYQ  | Controls | NA |
| 45  | 50  | VMYKWVMMRQ | Controls | NA |
| 45  | 62  | GCLPFTFDQK | Controls | NA |
| 20  | 21  | LQSDARRKVD | Controls | NA |
| 85  | 114 | HYLNLRELYL | Controls | NA |
| 52  | 64  | NTYVEEFMKH | Controls | NA |
| 92  | 120 | MNHVVKWRVR | Controls | NA |
| 66  | 83  | DSQWHERSCQ | Controls | NA |
| 27  | 35  | LIVVEQQFIN | Controls | NA |
| 27  | 41  | KAHLREGRGQ | Controls | NA |
| 45  | 65  | LASYMCPRTM | Controls | NA |
| 32  | 38  | WVEMIVMYLP | Controls | NA |
| 74  | 110 | NQCRNGKWF  | Controls | NA |
| 24  | 27  | HDNGINPNAM | Controls | NA |
| 47  | 55  | VARAWVMWVG | Controls | NA |
| 56  | 57  | RWMLQAMEEC | Controls | NA |
| 108 | 110 | HYMNWNICQL | Controls | NA |
| 12  | 20  | APWWACWINI | Controls | NA |
| 43  | 79  | AYWCYWLKLD | Controls | NA |



|     |     |            |          |    |
|-----|-----|------------|----------|----|
| 82  | 95  | KIPLERCQFL | Controls | NA |
| 107 | 134 | EKQCVFDERR | Controls | NA |
| 97  | 96  | CEPHWEHEQS | Controls | NA |
| 44  | 58  | CLIMSEAAFI | Controls | NA |
| 31  | 22  | WRMYREVYKC | Controls | NA |
| 45  | 58  | CIIVEPDRNY | Controls | NA |
| 64  | 63  | EPAAQQCGCQ | Controls | NA |
| 46  | 59  | DYPAVGKRSL | Controls | NA |
| 137 | 145 | PCLYWYNFDH | Controls | NA |
| 29  | 47  | HRFDWVNQAD | Controls | NA |
| 31  | 41  | GSNHMLWLNC | Controls | NA |
| 48  | 63  | WFYDPYYTII | Controls | NA |
| 74  | 100 | CFLEPLPQAF | Controls | NA |
| 53  | 65  | HYNSQRFHTE | Controls | NA |
| 55  | 62  | SMARLCLVSE | Controls | NA |
| 19  | 36  | KAARDIIDLC | Controls | NA |
| 21  | 21  | YDILYSDIII | Controls | NA |
| 49  | 59  | ITRVRRRSLH | Controls | NA |
| 44  | 58  | REIEHYTKVS | Controls | NA |
| 163 | 222 | YNIQTKCAHL | Controls | NA |
| 111 | 133 | NYHNEQCDRQ | Controls | NA |
| 72  | 115 | ELHQEMLCKA | Controls | NA |
| 215 | 261 | MHCNHSFGIM | Controls | NA |
| 52  | 63  | VKVLRWEMSP | Controls | NA |
| 136 | 133 | EIHMAWCWCS | Controls | NA |
| 37  | 43  | KASGIIGMRF | Controls | NA |
| 70  | 85  | GMMWMCVQS  | Controls | NA |
| 108 | 119 | LSPFCMRDVK | Controls | NA |
| 21  | 40  | FPQWTSHQKG | Controls | NA |
| 47  | 46  | KCQSSRAKFV | Controls | NA |
| 30  | 43  | TAESKPEITQ | Controls | NA |
| 15  | 32  | ILQMFNGSHK | Controls | NA |
| 23  | 31  | NVYRKQEVGS | Controls | NA |
| 34  | 33  | IQYTAECPEP | Controls | NA |
| 103 | 126 | KRARIRHLYI | Controls | NA |
| 44  | 47  | AAEWDPVSIR | Controls | NA |
| 33  | 38  | WAMGIYGALQ | Controls | NA |
| 42  | 54  | IWAPWHWDKL | Controls | NA |
| 29  | 45  | DMNGTSDCMK | Controls | NA |
| 83  | 122 | SLYNVCKHDF | Controls | NA |
| 21  | 25  | RTRTHSPLSK | Controls | NA |

|     |     |                      |    |
|-----|-----|----------------------|----|
| 27  | 35  | AILNNRDI SE Controls | NA |
| 44  | 56  | AETTQKVGAK Controls  | NA |
| 49  | 64  | HSTQYQWLAG Controls  | NA |
| 55  | 71  | FNRNDR LAAQ Controls | NA |
| 52  | 72  | TACPRYRTEL Controls  | NA |
| 14  | 17  | RSKQRLMSYL Controls  | NA |
| 20  | 18  | TPSFNPKRDI Controls  | NA |
| 75  | 73  | NEQDLHWYKN Controls  | NA |
| 60  | 86  | WGGNEKGYMK Controls  | NA |
| 77  | 76  | AWINFVQRWK Controls  | NA |
| 60  | 90  | LHISGKCHGF Controls  | NA |
| 48  | 55  | QKRHRNVSDK Controls  | NA |
| 67  | 93  | TNWQEPDGKL Controls  | NA |
| 9   | 1   | MQAQAHGSCY Controls  | NA |
| 26  | 55  | QMTAAKDWSG Controls  | NA |
| 22  | 17  | MHSSMFEEAY Controls  | NA |
| 30  | 27  | KAYMNPDECL Controls  | NA |
| 48  | 51  | FTMPKMI PQH Controls | NA |
| 35  | 42  | SLQVVQDEM Q Controls | NA |
| 48  | 51  | RPNEIWDDYE Controls  | NA |
| 100 | 140 | SRCICCCDHM Controls  | NA |
| 74  | 106 | LMNVAPHDLF Controls  | NA |
| 60  | 55  | RNMNCVFLIC Controls  | NA |
| 15  | 24  | RKIPSSSEAH Controls  | NA |
| 89  | 76  | PGCNGERCFR Controls  | NA |
| 146 | 190 | QHSSRM RWAQ Controls | NA |
| 204 | 216 | PNEDTIHYFH Controls  | NA |
| 60  | 115 | VALKWRRPMR Controls  | NA |
| 25  | 41  | IVLKFTEENG Controls  | NA |
| 84  | 103 | HDTYFHYQNL Controls  | NA |
| 85  | 89  | HDMHDWRWHF Controls  | NA |
| 20  | 29  | ISCEMCPPEY Controls  | NA |
| 44  | 27  | VWMGNPNEQG Controls  | NA |
| 50  | 65  | TGHSDHPSTE Controls  | NA |
| 56  | 63  | MGIQCDTLQA Controls  | NA |
| 66  | 93  | SHPMLLSWWL Controls  | NA |
| 58  | 63  | IRWVIMMHAT Controls  | NA |
| 55  | 64  | EHDQWDWGWA Controls  | NA |
| 84  | 107 | ARAWRGDLNP Controls  | NA |
| 63  | 62  | KGFMYRFKFP Controls  | NA |
| 39  | 51  | KSRPPQWFSI Controls  | NA |

|     |     |             |          |    |
|-----|-----|-------------|----------|----|
| 83  | 118 | MPTMLKQLIL  | Controls | NA |
| 6   | 8   | DLSFDYCHKC  | Controls | NA |
| 6   | 6   | YKNSPYWI PD | Controls | NA |
| 27  | 35  | IYGGV FYEMT | Controls | NA |
| 28  | 37  | GCLTF SHDKA | Controls | NA |
| 74  | 100 | SLVSPWQVLW  | Controls | NA |
| 95  | 104 | CQGRYSIMVR  | Controls | NA |
| 29  | 40  | LEWLARCGWL  | Controls | NA |
| 88  | 97  | QSAHETR RER | Controls | NA |
| 45  | 73  | YIIESIDDFK  | Controls | NA |
| 4   | 18  | KFTDPECLQD  | Controls | NA |
| 109 | 135 | WNKTKARLHL  | Controls | NA |
| 34  | 50  | RPEDETVQHH  | Controls | NA |
| 524 | 712 | MHTHPQHSTW  | Controls | NA |
| 4   | 7   | AVNNLLQLEE  | Controls | NA |
| 44  | 72  | QGFVNMQYYI  | Controls | NA |
| 70  | 101 | SKKQKMHLLM  | Controls | NA |
| 33  | 37  | ACQPRVFRGF  | Controls | NA |
| 60  | 70  | DWYSWVLD RR | Controls | NA |
| 41  | 53  | VLPEIKRSKE  | Controls | NA |
| 17  | 19  | EVACYDILLA  | Controls | NA |
| 32  | 52  | SMQANLIETG  | Controls | NA |
| 49  | 69  | YKMVWAQWPR  | Controls | NA |
| 191 | 231 | IWNYYRHNFV  | Controls | NA |
| 61  | 76  | GQYCETTRTF  | Controls | NA |
| 24  | 36  | WIRKTTRKPG  | Controls | NA |
| 51  | 75  | GLSADAKMKT  | Controls | NA |
| 83  | 97  | QFHVYWETNR  | Controls | NA |
| 35  | 42  | IAWPQYLDGN  | Controls | NA |
| 21  | 30  | TQEAEYFDNG  | Controls | NA |
| 115 | 122 | YNFMCPYVPH  | Controls | NA |
| 73  | 100 | KRQEMSPPAR  | Controls | NA |
| 33  | 40  | NRMTFCTDLA  | Controls | NA |
| 59  | 62  | VKMHVAVCAV  | Controls | NA |
| 113 | 154 | MMTKWSTVMM  | Controls | NA |
| 34  | 37  | MWWEAWSICW  | Controls | NA |
| 54  | 69  | LHSTVKASIE  | Controls | NA |
| 25  | 34  | WDMMKYSDPG  | Controls | NA |
| 106 | 142 | YVWECHAFGP  | Controls | NA |
| 44  | 44  | DIGWVAGVPG  | Controls | NA |
| 64  | 60  | LTNTQNI VLR | Controls | NA |

|     |     |            |          |    |
|-----|-----|------------|----------|----|
| 65  | 59  | HYWAVDAWKD | Controls | NA |
| 27  | 23  | HTDHDFSJET | Controls | NA |
| 155 | 212 | WFCEHCRHMN | Controls | NA |
| 54  | 81  | INPWPDRNYM | Controls | NA |
| 51  | 69  | RWDKAEYMEE | Controls | NA |
| 69  | 91  | LYKQLGKLIA | Controls | NA |
| 37  | 42  | QIRKKPINGP | Controls | NA |
| 26  | 25  | LMTMIWAAYF | Controls | NA |
| 76  | 78  | PHNRKYLCGG | Controls | NA |
| 47  | 57  | VNMHFTYLNP | Controls | NA |
| 27  | 38  | FDAFMNEIDS | Controls | NA |
| 51  | 50  | NCTFRYITTP | Controls | NA |
| 76  | 75  | NIPHYRINQF | Controls | NA |
| 57  | 95  | FLLHYFQNTK | Controls | NA |
| 123 | 110 | QTDETWRHGR | Controls | NA |
| 53  | 65  | RDFEHQNMLY | Controls | NA |
| 87  | 130 | EKWLRWAVKS | Controls | NA |
| 71  | 75  | YEWNVQFCSQ | Controls | NA |
| 61  | 75  | TCHATFMEGS | Controls | NA |
| 54  | 46  | LGHPPCIKLN | Controls | NA |
| 89  | 101 | KMNCWKWKLW | Controls | NA |
| 164 | 193 | INVAFHMCFQ | Controls | NA |
| 60  | 97  | YKYFYTDHMF | Controls | NA |
| 53  | 57  | RIYWMEMSJK | Controls | NA |
| 23  | 25  | NISTMLKTSR | Controls | NA |
| 34  | 48  | SDGGVARLAF | Controls | NA |
| 94  | 93  | YCWQDEGGGA | Controls | NA |
| 20  | 14  | ITVGECYLHG | Controls | NA |
| 93  | 123 | KTQFSCIHHH | Controls | NA |
| 40  | 49  | PPLYTMAVGE | Controls | NA |
| 43  | 46  | KMIYWLQKKR | Controls | NA |
| 99  | 143 | SIHIDKKWGF | Controls | NA |
| 21  | 21  | NNTMCYNSYQ | Controls | NA |
| 52  | 37  | DSHFNEVCLI | Controls | NA |
| 51  | 48  | GCKTRAVARC | Controls | NA |
| 97  | 111 | RWLSFGQNGV | Controls | NA |
| 67  | 138 | DMIWHFMMSK | Controls | NA |
| 6   | 12  | TWFVDAQLLH | Controls | NA |
| 54  | 61  | VPFWADINEM | Controls | NA |
| 95  | 146 | MKLPYVWNAT | Controls | NA |
| 82  | 102 | KKALMDKSWE | Controls | NA |

|     |     |             |          |    |
|-----|-----|-------------|----------|----|
| 25  | 34  | ILWVSRYIWT  | Controls | NA |
| 40  | 40  | RFDKTIQWHW  | Controls | NA |
| 50  | 68  | PMAGMMAMDC  | Controls | NA |
| 68  | 81  | TQVGERASYQ  | Controls | NA |
| 97  | 99  | PKITRWMYDQ  | Controls | NA |
| 50  | 65  | WQICMRIQCA  | Controls | NA |
| 57  | 65  | EEANIKIKIP  | Controls | NA |
| 47  | 31  | PVSIVRAWET  | Controls | NA |
| 40  | 34  | HDTGDTRVEE  | Controls | NA |
| 116 | 155 | GQGLGWHIVP  | Controls | NA |
| 43  | 64  | IWKWKFFVYLM | Controls | NA |
| 376 | 426 | HHRRWIHCHD  | Controls | NA |
| 50  | 52  | AVQAPMYPVC  | Controls | NA |
| 55  | 55  | ATQGAAMKHG  | Controls | NA |
| 106 | 119 | HVADVHFAKL  | Controls | NA |
| 57  | 77  | SDMAVYWPTV  | Controls | NA |
| 88  | 117 | EWTKGGRWHA  | Controls | NA |
| 130 | 154 | VPFCDIWPHY  | Controls | NA |
| 60  | 71  | VCQYFPAFNR  | Controls | NA |
| 73  | 76  | VEMFACNDKF  | Controls | NA |
| 69  | 69  | KLYKYDWWMI  | Controls | NA |
| 53  | 65  | AGCSDAPQTK  | Controls | NA |
| 49  | 70  | PEFIPSMRPC  | Controls | NA |
| 66  | 83  | IICSIGVMHM  | Controls | NA |
| 47  | 76  | DTEPNTVWAS  | Controls | NA |
| 47  | 49  | EGQKIDDVTE  | Controls | NA |
| 44  | 49  | QWRGCM DVCS | Controls | NA |
| 48  | 36  | EGGPRSYMNF  | Controls | NA |
| 55  | 72  | FHMATSLKMF  | Controls | NA |
| 59  | 56  | FKVIWYSRPC  | Controls | NA |
| 101 | 109 | NHEMAFAIYP  | Controls | NA |
| 36  | 35  | TRLTDIYSWS  | Controls | NA |
| 40  | 44  | QSSYDYHEGP  | Controls | NA |
| 65  | 77  | DKEAHHNMVI  | Controls | NA |
| 40  | 46  | TSDCRCMYDL  | Controls | NA |
| 28  | 45  | ADKHKYTTPQ  | Controls | NA |
| 107 | 104 | QYQNAFAWTW  | Controls | NA |
| 52  | 85  | VHCCFAEVEH  | Controls | NA |
| 31  | 35  | SCICCSHQKA  | Controls | NA |
| 87  | 80  | NLEYLWEYML  | Controls | NA |
| 52  | 48  | NVHEYMMEEP  | Controls | NA |

|     |     |             |          |    |
|-----|-----|-------------|----------|----|
| 35  | 35  | AEKPPNKEEH  | Controls | NA |
| 43  | 56  | TNYMLPYQSY  | Controls | NA |
| 51  | 45  | PIQHFGVEPT  | Controls | NA |
| 237 | 282 | AHIATIKHCH  | Controls | NA |
| 47  | 49  | MAMQOTCYFW  | Controls | NA |
| 58  | 82  | NFARNPWWSC  | Controls | NA |
| 84  | 78  | WTKRKCMIAIY | Controls | NA |
| 63  | 76  | SCQDHLTKQT  | Controls | NA |
| 44  | 42  | EYCQNGFEAN  | Controls | NA |
| 60  | 85  | KSCCNNAVIA  | Controls | NA |
| 75  | 86  | EMKCSVCTSQ  | Controls | NA |
| 52  | 79  | DHLCTPDQCY  | Controls | NA |
| 93  | 94  | KNICVTVHQT  | Controls | NA |
| 22  | 39  | FYTFRMTVLI  | Controls | NA |
| 42  | 49  | SLNARQNMGN  | Controls | NA |
| 83  | 76  | QGMKSISEHH  | Controls | NA |
| 284 | 321 | KHCKHLAYQW  | Controls | NA |
| 27  | 40  | KSHTQGAPPG  | Controls | NA |
| 30  | 41  | FDIIISDFTV  | Controls | NA |
| 21  | 34  | QQKVVAILKA  | Controls | NA |
| 32  | 21  | NAFPILNFEY  | Controls | NA |
| 53  | 86  | CRIMDVIEWI  | Controls | NA |
| 57  | 65  | LELIDLDFKE  | Controls | NA |
| 77  | 66  | YPFQSLTNWE  | Controls | NA |
| 82  | 84  | FIYHPSTERK  | Controls | NA |
| 136 | 193 | ICEPHCWCSR  | Controls | NA |
| 37  | 65  | GLCDVWQDNP  | Controls | NA |
| 33  | 39  | LAKKHSYISM  | Controls | NA |
| 39  | 33  | SSQYCKVYYT  | Controls | NA |
| 13  | 16  | GCSWTEWMLV  | Controls | NA |
| 51  | 86  | MTIAIINKWL  | Controls | NA |
| 65  | 77  | SWDAIQIVHL  | Controls | NA |
| 48  | 68  | ADRHGPPLYD  | Controls | NA |
| 44  | 47  | PTWYPPQAAP  | Controls | NA |
| 137 | 164 | IYGHSLKMHM  | Controls | NA |
| 21  | 32  | AHSSVQNIIN  | Controls | NA |
| 199 | 248 | KMGDERFYPH  | Controls | NA |
| 125 | 172 | STKLASHVYV  | Controls | NA |
| 32  | 17  | KDIEDSARME  | Controls | NA |
| 315 | 381 | TTATDYHRQW  | Controls | NA |
| 24  | 31  | ASSYGWSMMT  | Controls | NA |

|     |     |             |          |    |
|-----|-----|-------------|----------|----|
| 23  | 32  | CAQIKPAAPE  | Controls | NA |
| 38  | 41  | TIKRFCCCLKT | Controls | NA |
| 116 | 99  | PYEYCFFYAP  | Controls | NA |
| 32  | 46  | PDHNDCSDMT  | Controls | NA |
| 21  | 30  | GDTMWLWDKF  | Controls | NA |
| 46  | 55  | NTLQDWKGWR  | Controls | NA |
| 68  | 90  | DCCITVVFVSK | Controls | NA |
| 35  | 35  | KIGWYMLGWN  | Controls | NA |
| 71  | 90  | QWRCLVGPVE  | Controls | NA |
| 65  | 71  | FAPPWSIMQH  | Controls | NA |
| 50  | 48  | AITDGTSNGS  | Controls | NA |
| 36  | 63  | CHNNGEAIND  | Controls | NA |
| 45  | 58  | NLMMYCPDQT  | Controls | NA |
| 52  | 51  | TDAGINLYLN  | Controls | NA |
| 28  | 46  | DSHTVQDMHA  | Controls | NA |
| 64  | 98  | NWTWVRFEDE  | Controls | NA |
| 68  | 83  | GHTHLARNKC  | Controls | NA |
| 43  | 34  | WEVAPTTDSN  | Controls | NA |
| 58  | 59  | WFEKQGNPVM  | Controls | NA |
| 46  | 50  | CGPRATCVMD  | Controls | NA |
| 30  | 37  | GCQPWRFCNP  | Controls | NA |
| 45  | 61  | RQPKNNLGIF  | Controls | NA |
| 95  | 124 | SQNEKYPLNW  | Controls | NA |
| 118 | 124 | WKIPFCCFEE  | Controls | NA |
| 25  | 19  | FLAAYPGSSI  | Controls | NA |
| 88  | 110 | YDITHLAYDH  | Controls | NA |
| 23  | 29  | LVLHWDSHSC  | Controls | NA |
| 95  | 120 | SAVDCRCGRN  | Controls | NA |
| 32  | 32  | FGKTKRRSVQ  | Controls | NA |
| 120 | 141 | LKELDPMCQ   | Controls | NA |
| 37  | 59  | VWGCATEQEG  | Controls | NA |
| 28  | 35  | ERAPIWFEP   | Controls | NA |
| 76  | 97  | QIHASGLHLS  | Controls | NA |
| 49  | 75  | NCDQNLDIRK  | Controls | NA |
| 14  | 20  | ACALFLMCAA  | Controls | NA |
| 84  | 110 | TCKRQWYVKY  | Controls | NA |
| 44  | 59  | NICNTGESIL  | Controls | NA |
| 60  | 78  | KSMKDRENEP  | Controls | NA |
| 40  | 61  | SGGPTGMSLS  | Controls | NA |
| 32  | 38  | DRTTEMSTAD  | Controls | NA |
| 69  | 82  | CITDLVMFMK  | Controls | NA |

|     |     |             |          |    |
|-----|-----|-------------|----------|----|
| 63  | 104 | AHWIWSHRIA  | Controls | NA |
| 64  | 73  | WHYPTDPWMV  | Controls | NA |
| 7   | 4   | EAHDNCLDCN  | Controls | NA |
| 121 | 144 | ECQTSRDNAW  | Controls | NA |
| 80  | 87  | INDPQWIWQS  | Controls | NA |
| 54  | 60  | YQRLSYGNDV  | Controls | NA |
| 18  | 21  | ACLMMFIYWY  | Controls | NA |
| 8   | 15  | EPNGSARLMM  | Controls | NA |
| 10  | 8   | ILQLEWGSQY  | Controls | NA |
| 85  | 94  | HDFREMMKMP  | Controls | NA |
| 78  | 97  | MPAQDFVWYY  | Controls | NA |
| 10  | 10  | GSKTQRRFRK  | Controls | NA |
| 33  | 33  | ISESHRIKHA  | Controls | NA |
| 43  | 65  | EWFGGTWTTW  | Controls | NA |
| 49  | 47  | VWLIIQVPLQ  | Controls | NA |
| 20  | 14  | SPGTEVWGEA  | Controls | NA |
| 32  | 39  | PCNITMHGAQ  | Controls | NA |
| 34  | 32  | HASQILHSIF  | Controls | NA |
| 86  | 87  | MHNDDVCPGP  | Controls | NA |
| 43  | 50  | WPTFPWVWNC  | Controls | NA |
| 103 | 117 | PWVHAWTWSR  | Controls | NA |
| 65  | 82  | IHVGIPTHYD  | Controls | NA |
| 28  | 37  | IRTDPQCSSV  | Controls | NA |
| 33  | 26  | WLQCYICVTV  | Controls | NA |
| 54  | 83  | EELMDCNPLF  | Controls | NA |
| 74  | 80  | DMMKQETSRV  | Controls | NA |
| 28  | 39  | PQWFLIYAEY  | Controls | NA |
| 41  | 49  | QYSMGWIVYM  | Controls | NA |
| 48  | 54  | PYDYALNPWC  | Controls | NA |
| 25  | 54  | EEGPDFNDQL  | Controls | NA |
| 72  | 78  | DCGAEERAHL  | Controls | NA |
| 33  | 31  | ESNNSQGGNV  | Controls | NA |
| 70  | 96  | LTIFYDYNDCK | Controls | NA |
| 134 | 173 | WQWYCDCSMM  | Controls | NA |
| 34  | 34  | QVQFLFRARF  | Controls | NA |
| 27  | 46  | IATTPPPDMV  | Controls | NA |
| 31  | 30  | PCAQTDDCYG  | Controls | NA |
| 51  | 50  | GIKWNQIWYS  | Controls | NA |
| 12  | 26  | AESYVDQTSQ  | Controls | NA |
| 57  | 67  | EPEEKLG MFD | Controls | NA |
| 84  | 89  | NWMWEASGCQ  | Controls | NA |



|     |     |             |          |    |
|-----|-----|-------------|----------|----|
| 60  | 63  | KQFPWQKKFI  | Controls | NA |
| 41  | 55  | FDVYVVYSAE  | Controls | NA |
| 18  | 18  | DLVGTPKIKD  | Controls | NA |
| 108 | 117 | SKRNFVDKCF  | Controls | NA |
| 34  | 58  | RKGMEQWSDH  | Controls | NA |
| 14  | 28  | GEINDKDQTT  | Controls | NA |
| 25  | 28  | YGFKMQQHVR  | Controls | NA |
| 58  | 80  | MHAFLIIMP   | Controls | NA |
| 42  | 54  | EI IWSRRNMR | Controls | NA |
| 109 | 119 | EVEIYRHFFG  | Controls | NA |
| 84  | 80  | KDWMKHEDSQ  | Controls | NA |
| 157 | 178 | IKRDCPMVHH  | Controls | NA |
| 23  | 30  | IAIMVYFHLN  | Controls | NA |
| 104 | 128 | VDKTHAMRVM  | Controls | NA |
| 32  | 53  | TVSQCMNLNK  | Controls | NA |
| 67  | 85  | RTASKKWYLE  | Controls | NA |
| 69  | 76  | IDEYCQYDSN  | Controls | NA |
| 0   | 0   | FLRYVTILYC  | Controls | NA |
| 62  | 88  | VHPLWMPSIL  | Controls | NA |
| 14  | 11  | PARAYNADPT  | Controls | NA |
| 21  | 35  | GLTDGETYQF  | Controls | NA |
| 15  | 16  | TWRHFYYTFL  | Controls | NA |
| 30  | 35  | FTSMLLWFCL  | Controls | NA |
| 36  | 40  | FKACNDKIKG  | Controls | NA |
| 78  | 101 | PQNKMKRAAV  | Controls | NA |
| 39  | 45  | DLFCSDPPKA  | Controls | NA |
| 17  | 20  | GPSDNKVHSF  | Controls | NA |
| 130 | 149 | WLNKLSMAV   | Controls | NA |
| 39  | 38  | GENDENLSGG  | Controls | NA |
| 52  | 53  | FLFLIGRSHH  | Controls | NA |
| 26  | 55  | LEIQYMFWS   | Controls | NA |
| 33  | 29  | QMKMSHCSGY  | Controls | NA |
| 35  | 31  | IVIEWTVYDI  | Controls | NA |
| 45  | 51  | CIPILYRYYG  | Controls | NA |
| 48  | 70  | HYSSCCAFGH  | Controls | NA |
| 53  | 58  | LWWNQGHGLI  | Controls | NA |
| 176 | 165 | PHKDHYHIRF  | Controls | NA |
| 21  | 17  | QACTNIYMKS  | Controls | NA |
| 55  | 69  | FWVEGDSDKP  | Controls | NA |
| 91  | 95  | PFMLYFQREW  | Controls | NA |
| 31  | 46  | STCSVPCMNN  | Controls | NA |

|     |     |             |          |    |
|-----|-----|-------------|----------|----|
| 206 | 267 | HCREKDRRSR  | Controls | NA |
| 49  | 47  | RYKMDLEIDF  | Controls | NA |
| 44  | 57  | WAGKIPWYQA  | Controls | NA |
| 38  | 44  | VEVNPFGHKI  | Controls | NA |
| 77  | 86  | TMPWKMYEQF  | Controls | NA |
| 58  | 78  | LFGSAGRCAS  | Controls | NA |
| 38  | 58  | HGWYRKQAMV  | Controls | NA |
| 25  | 42  | IYVSNAYVYS  | Controls | NA |
| 132 | 156 | CWPHKAKSDW  | Controls | NA |
| 55  | 68  | QCSKKSVCIIY | Controls | NA |
| 10  | 7   | FWILRIWWYL  | Controls | NA |
| 66  | 102 | LLPLCQCWTT  | Controls | NA |
| 47  | 55  | PMSHSDTTY   | Controls | NA |
| 81  | 83  | GFNHQICAFD  | Controls | NA |
| 75  | 99  | KEKHVCGFNG  | Controls | NA |
| 110 | 141 | MHDFEIPNLW  | Controls | NA |
| 15  | 43  | TAIYATESAT  | Controls | NA |
| 39  | 63  | FLGSQIDCQD  | Controls | NA |
| 85  | 99  | RKMYTMFYNI  | Controls | NA |
| 32  | 37  | CVKEFWYSTG  | Controls | NA |
| 50  | 46  | FDIMSKDDMG  | Controls | NA |
| 35  | 40  | VNWCTIGLQW  | Controls | NA |
| 63  | 63  | VFAWMPFFGN  | Controls | NA |
| 63  | 78  | CILPGTYGRW  | Controls | NA |
| 29  | 40  | THHTSGLMDC  | Controls | NA |
| 15  | 24  | WCLVCAYIIM  | Controls | NA |
| 33  | 31  | CVLLRQNSIN  | Controls | NA |
| 83  | 105 | PCRGFMKFGP  | Controls | NA |
| 7   | 4   | FSQNPYSTR   | Controls | NA |
| 38  | 38  | IAFIVKSEI   | Controls | NA |
| 93  | 141 | DDHMKLHSRC  | Controls | NA |
| 52  | 66  | YNFDNKDEMC  | Controls | NA |
| 56  | 54  | IGLNKQKILE  | Controls | NA |
| 39  | 38  | LVWFACIHYR  | Controls | NA |
| 66  | 76  | LTRKRSPDWY  | Controls | NA |
| 36  | 35  | GQFSQALTCN  | Controls | NA |
| 66  | 57  | NINYQFINME  | Controls | NA |
| 16  | 21  | DNCNIPALLL  | Controls | NA |
| 34  | 37  | YWRRSVPQET  | Controls | NA |
| 62  | 89  | DIPVNTCCAE  | Controls | NA |
| 66  | 73  | TCIPPHENFW  | Controls | NA |

|     |     |                      |    |
|-----|-----|----------------------|----|
| 35  | 38  | KLDDLILECN Controls  | NA |
| 52  | 68  | VITRGVKAHR Controls  | NA |
| 76  | 81  | FWSHDKQGT A Controls | NA |
| 80  | 74  | QSKYAQAAGM Controls  | NA |
| 83  | 95  | EKLWDRNYPW Controls  | NA |
| 114 | 122 | DNETAQHARP Controls  | NA |
| 29  | 45  | SVKAQWNKDI Controls  | NA |
| 46  | 83  | WITNGHQLSY Controls  | NA |
| 95  | 135 | WMGPMFWDHG Controls  | NA |
| 135 | 154 | YHNLINYDDK Controls  | NA |
| 57  | 56  | HPIMQLEALG Controls  | NA |
| 54  | 63  | LMAPCQDAIT Controls  | NA |
| 20  | 32  | LLEVYANLTY Controls  | NA |
| 83  | 83  | VQLPNCWDGL Controls  | NA |
| 20  | 16  | IGTVYGMALM Controls  | NA |
| 43  | 73  | LYFQDKYRGM Controls  | NA |
| 64  | 69  | CNRIYPQPMR Controls  | NA |
| 35  | 29  | NKVMILTNS Controls   | NA |
| 99  | 120 | ICWLYAKPGM Controls  | NA |
| 118 | 163 | KYCQLLRNFV Controls  | NA |
| 146 | 169 | MPGEGWY EHL Controls | NA |
| 56  | 76  | IEKATGVIRR Controls  | NA |
| 53  | 59  | LAMSFCCRNM Controls  | NA |
| 55  | 53  | WYFCGNLVTH Controls  | NA |
| 41  | 41  | MEPDYGPQIG Controls  | NA |
| 48  | 49  | LGACEKFHNA Controls  | NA |
| 27  | 31  | YDFWQNRDAV Controls  | NA |
| 65  | 70  | GYSKEIYFTE Controls  | NA |
| 63  | 82  | HWTAGWPF EK Controls | NA |
| 86  | 102 | ELEKQLIQIM Controls  | NA |
| 69  | 77  | FWCTRDEMGG Controls  | NA |
| 57  | 60  | RQEKNKCF FH Controls | NA |
| 16  | 19  | QECSHSQDTI Controls  | NA |
| 85  | 97  | IMKHQIQMFK Controls  | NA |
| 84  | 97  | ACRVMEARTH Controls  | NA |
| 55  | 71  | CRGNSGCAYV Controls  | NA |
| 25  | 27  | FMCYLRQLIA Controls  | NA |
| 53  | 54  | CQYVLGP NNS Controls | NA |
| 56  | 80  | MCRVNTEGHN Controls  | NA |
| 39  | 56  | WELYYQSTDF Controls  | NA |
| 80  | 78  | HPTPGLNHCM Controls  | NA |

|     |     |             |          |    |
|-----|-----|-------------|----------|----|
| 26  | 22  | FIEIHYLFSW  | Controls | NA |
| 17  | 34  | MDVPMNTPQS  | Controls | NA |
| 58  | 74  | LEHIVPGYNE  | Controls | NA |
| 74  | 69  | QNAEHNVFEH  | Controls | NA |
| 62  | 71  | WYMKKGREHA  | Controls | NA |
| 27  | 36  | AVAVITYNGL  | Controls | NA |
| 92  | 95  | DDFWAWSPAW  | Controls | NA |
| 62  | 68  | ELYTAYFWYV  | Controls | NA |
| 16  | 17  | IYWTTTIIVT  | Controls | NA |
| 77  | 97  | PCQSDIDAWH  | Controls | NA |
| 95  | 99  | CESELNDTHF  | Controls | NA |
| 136 | 162 | ACMHPNERMP  | Controls | NA |
| 88  | 112 | QSDAFRHWCV  | Controls | NA |
| 38  | 62  | ICSPVAKCDG  | Controls | NA |
| 64  | 61  | FVQWNSDPFM  | Controls | NA |
| 60  | 60  | IMYCGHTPKH  | Controls | NA |
| 27  | 39  | DGALSGKFDL  | Controls | NA |
| 7   | 21  | GPFDLLDFNG  | Controls | NA |
| 17  | 14  | GDEVDNKVKG  | Controls | NA |
| 40  | 34  | GGDEV DGAGG | Controls | NA |
| 21  | 26  | GAVEVDGAGG  | Controls | NA |
| 20  | 30  | GADVVDGAGG  | Controls | NA |
| 19  | 23  | GADTVDGAGG  | Controls | NA |
| 14  | 16  | GADAVDGAGG  | Controls | NA |
| 17  | 18  | GGKKRRPVKG  | Controls | NA |
| 53  | 79  | GRERKAGCKG  | Controls | NA |
| 36  | 30  | GRPRRTKKTG  | Controls | NA |
| 85  | 107 | GRKKRSVVVG  | Controls | NA |
| 97  | 157 | GHSRRSRRSG  | Controls | NA |
| 28  | 23  | GGLKRGGAKG  | Controls | NA |
| 36  | 37  | GGDDDDKAGG  | Controls | NA |
| 57  | 68  | GGDRVYIHPG  | Controls | NA |
| 103 | 124 | GEERARAKWG  | Controls | NA |
| 52  | 43  | GTFHKAERYG  | Controls | NA |
| 23  | 30  | GEGERGFFYG  | Controls | NA |
| 32  | 32  | GDDDKIVGGG  | Controls | NA |
| 7   | 17  | GVEGERGFFG  | Controls | NA |
| 49  | 53  | GRKKRSTSAG  | Controls | NA |
| 52  | 62  | GRERREVV RG | Controls | NA |
| 36  | 48  | GRNKRNSKMG  | Controls | NA |
| 97  | 128 | GRHRRQIDRG  | Controls | NA |

|    |     |             |          |                                                 |
|----|-----|-------------|----------|-------------------------------------------------|
| 65 | 75  | GRQKRFVLSG  | Controls | NA                                              |
| 91 | 111 | GRRKRYAIQG  | Controls | NA                                              |
| 53 | 62  | GFHIRRKRYG  | Controls | NA                                              |
| 61 | 98  | GEGIYGVFFA  | Controls | NA                                              |
| 6  | 25  | IVVLTLLICH  | Controls | NA                                              |
| 12 | 11  | FEYCCYGDLL  | Controls | NA                                              |
| 49 | 62  | LGCQLADAE   | Controls | NA                                              |
| 14 | 13  | GGLVPRGSAG  | Controls | NA                                              |
| 15 | 12  | GAPRSSMSNG  | Controls | NA                                              |
| 4  | 9   | AAPRSSMSNG  | Controls | NA                                              |
| 25 | 44  | GAPRSSMSNA  | Controls | NA                                              |
| 6  | 10  | GAPYSSMSNG  | Controls | NA                                              |
| 27 | 37  | GAPRVMSNG   | Controls | NA                                              |
| 18 | 15  | GAPRSKMSNG  | Controls | NA                                              |
| 20 | 32  | GAPRSVMSNG  | Controls | NA                                              |
| 22 | 12  | GAPRSSPSNG  | Controls | NA                                              |
| 17 | 20  | GAPRSSMSKG  | Controls | NA                                              |
| 27 | 34  | GGVPRSFRGG  | Controls | NA                                              |
| 15 | 29  | GIEPRSFQSG  | Controls | NA                                              |
| 24 | 33  | GQSPRSFQKG  | Controls | NA                                              |
| 16 | 14  | GLSPRTFHPG  | Controls | NA                                              |
| 39 | 41  | GLGIRSFNRG  | Controls | NA                                              |
| 23 | 23  | GVVPRGVNLG  | Controls | NA                                              |
| 12 | 6   | GGLVPRGSGG  | Controls | NA                                              |
| 75 | 96  | GLAYGLRSKG  | Controls | NA                                              |
| 53 | 62  | ALAYGLRSKG  | Controls | NA                                              |
| 73 | 81  | GLAYGLRSKA  | Controls | NA                                              |
| 56 | 63  | GQRKRGGTAG  | Controls | NA                                              |
| 62 | 96  | GQKKRGGTAG  | Controls | NA                                              |
| 51 | 55  | GQKKRGGPAG  | Controls | NA                                              |
| 39 | 39  | GNKKRGGTAG  | Controls | NA                                              |
| 42 | 50  | GNKRRGGTAG  | Controls | NA                                              |
| 23 | 21  | LSILTTLTASG | Controls | NA                                              |
| 32 | 41  | SGPWLLVLTA  | Controls | NA                                              |
| 16 | 20  | YVYTTITASG  | Controls | NA                                              |
| 64 | 78  | KPKRKRWTGQ  | Furin    | >gi 153266866 ref NP_002034.2  gamma-aminc      |
| 65 | 88  | SNRTMKSUNA  | Furin    | >gi 16933540 ref NP_004451.2  fibroblast activa |
| 20 | 25  | RARNKRESGK  | Furin    | >gi 189163504 ref NP_001121171.1  serine pep    |
| 32 | 35  | KSRNKRQSKS  | Furin    | >gi 189163504 ref NP_001121171.1  serine pep    |
| 12 | 23  | RAVKKREAEK  | Furin    | >gi 189163504 ref NP_001121171.1  serine pep    |
| 25 | 48  | NMRKRKSQR   | Furin    | >gi 218505789 ref NP_001136242.1  protocadh     |

|     |                      |                                                           |
|-----|----------------------|-----------------------------------------------------------|
| 37  | 58 GARERRDVQR Furin  | >gi 29571106 ref NP_001711.2  bone morphoge               |
| 64  | 77 PIRTPRAVRP Furin  | >gi 29571106 ref NP_001711.2  bone morphoge               |
| 86  | 82 NQRVRRRAATP Furin | >gi 4557389 ref NP_000553.1  complement con               |
| 66  | 97 AWRVRRRLVRH Furin | >gi 7706451 ref NP_057319.1  G protein-couple             |
| 53  | 60 NKSFRRRAFLI Furin | >gi 11321563 ref NP_000861.1  serotonin 5-HT <sub>2</sub> |
| 34  | 47 GPRRRRSSKR Furin  | >gi 116089333 ref NP_689588.2  kelch domain               |
| 62  | 51 RRSSKRAEAP Furin  | >gi 116089333 ref NP_689588.2  kelch domain               |
| 60  | 57 PEDFVRSITP Furin  | >gi 116256483 ref NP_006068.2  calcium bindin             |
| 57  | 48 PEAGRRESEAE Furin | >gi 14042925 ref NP_114404.1  ring finger prot            |
| 63  | 73 FTLLTRIPGF Furin  | >gi 14149771 ref NP_115494.1  WD repeat dor               |
| 113 | 128 SADGRRFRQA Furin | >gi 158138530 ref NP_775754.2  cytochrome P <sub>4</sub>  |
| 29  | 41 ADLVVRGPPG Furin  | >gi 28373117 ref NP_001834.2  contactin 1 isof            |
| 58  | 69 FARYYRDAAG Furin  | >gi 28416933 ref NP_002552.2  purinergic rece             |
| 15  | 15 PPEAKRGSSS Furin  | >gi 28416933 ref NP_002552.2  purinergic rece             |
| 30  | 31 LEESKRLVDT Furin  | >gi 28558982 ref NP_000538.3  thyroid peroxid             |
| 29  | 48 RNLKKGILS Furin   | >gi 28558982 ref NP_000538.3  thyroid peroxid             |
| 61  | 54 LRDSGRAYLP Furin  | >gi 28558982 ref NP_000538.3  thyroid peroxid             |
| 33  | 38 RDYIPRILGP Furin  | >gi 28558982 ref NP_000538.3  thyroid peroxid             |
| 28  | 40 YELQGREQLT Furin  | >gi 28558982 ref NP_000538.3  thyroid peroxid             |
| 50  | 64 LGDDGRTCVD Furin  | >gi 28558982 ref NP_000538.3  thyroid peroxid             |
| 32  | 40 LHLKKRIKSV Furin  | >gi 28882035 ref NP_795369.1  taste receptor              |
| 28  | 33 RLRFRDFILT Furin  | >gi 32895363 ref NP_871714.1  leukocyte immu              |
| 29  | 51 QELRKRLTPL Furin  | >gi 37620216 ref NP_932346.1  methionine sulf             |
| 150 | 170 DARTRSFWS Furin  | >gi 37693519 ref NP_597725.1  BMP-binding er              |
| 53  | 52 IERVARVRGG Furin  | >gi 4504489 ref NP_000403.1  histidine-rich gly           |
| 32  | 64 GHLRRRGPGK Furin  | >gi 4504489 ref NP_000403.1  histidine-rich gly           |
| 19  | 29 APPRRRARSLS Furin | >gi 47578101 ref NP_996809.1  selenoprotein M             |
| 56  | 81 DDDFERSRAF Furin  | >gi 5032137 ref NP_005629.1  vesicle-associate            |
| 46  | 49 NEIKKRFQTT Furin  | >gi 5032137 ref NP_005629.1  vesicle-associate            |
| 3   | 4 EVLRKRSSST Furin   | >gi 5453577 ref NP_006410.1  chemokine (C-X-              |
| 70  | 75 AERSGRGPFPG Furin | >gi 6005990 ref NP_000478.2  arylsulfatase A is           |
| 100 | 98 REERRRQAGA Furin  | >gi 7706113 ref NP_057664.1  protocadherin 1:             |
| 39  | 57 VDVQARDLGP Furin  | >gi 7706113 ref NP_057664.1  protocadherin 1:             |
| 61  | 73 HFRLKRTNGN Furin  | >gi 7706113 ref NP_057664.1  protocadherin 1:             |
| 35  | 44 LVPVLRGQAG Furin  | >gi 7706113 ref NP_057664.1  protocadherin 1:             |
| 56  | 73 VAERKRECQL Furin  | >gi 83582796 ref NP_001032818.1  beta-defens              |
| 72  | 99 SRRLPRSNLS Furin  | >gi 116517332 ref NP_054789.2  STG protein [F             |
| 23  | 19 TSRNTRSEDED Furin | >gi 145275198 ref NP_997400.2  ADAMTS-like :              |
| 49  | 45 DIRLKRVVPD Furin  | >gi 145275198 ref NP_997400.2  ADAMTS-like :              |
| 16  | 30 GGRVSRSSSA Furin  | >gi 14589920 ref NP_116750.1  protocadherin :             |
| 39  | 52 LARHYKSASP Furin  | >gi 14589920 ref NP_116750.1  protocadherin :             |

|     |     |             |       |                                  |                   |
|-----|-----|-------------|-------|----------------------------------|-------------------|
| 55  | 54  | PNI IKRSAWE | Furin | >gi 16418405 ref NP_443123.1     | peptidoglycan r   |
| 80  | 104 | ISRKRRSIRY  | Furin | >gi 18860894 ref NP_569077.1     | protein tyrosine  |
| 31  | 29  | QPRRSRDVSC  | Furin | >gi 19923903 ref NP_612382.1     | myeloid-associ    |
| 23  | 43  | VSRSKRDISS  | Furin | >gi 30520377 ref NP_071317.2     | CUB and zona p    |
| 61  | 75  | PIRLKRDRSA  | Furin | >gi 30520377 ref NP_071317.2     | CUB and zona p    |
| 20  | 29  | RQRQRRRAAGG | Furin | >gi 73695936 ref NP_620596.2     | ADAM metallo      |
| 49  | 32  | GNRQVRGVTQ  | Furin | >gi 73695936 ref NP_620596.2     | ADAM metallo      |
| 77  | 78  | RERPVR CVEA | Furin | >gi 73695936 ref NP_620596.2     | ADAM metallo      |
| 31  | 47  | RIRTIRSFEG  | Furin | >gi 110618224 ref NP_001754.2    | CD1A antigen      |
| 106 | 94  | SKRKS RPVSV | Furin | >gi 11321597 ref NP_002244.1     | kinase insert dc  |
| 51  | 61  | WKRYRRWMKN  | Furin | >gi 118498347 ref NP_001015882.2 | DnaJ (Hsp4        |
| 44  | 52  | PRRRGRFKGL  | Furin | >gi 118600983 ref NP_004377.2    | chondroitin su    |
| 118 | 156 | SHRMRRHHHH  | Furin | >gi 118600983 ref NP_004377.2    | chondroitin su    |
| 45  | 41  | KSRKERRKHK  | Furin | >gi 118600983 ref NP_004377.2    | chondroitin su    |
| 133 | 201 | WSRHRRLTP   | Furin | >gi 150036266 ref NP_076433.2    | cytochrome P4     |
| 67  | 81  | KKRPRRMKRE  | Furin | >gi 15451844 ref NP_150377.1     | ADAM metallo      |
| 26  | 59  | PRRMKREDLN  | Furin | >gi 15451844 ref NP_150377.1     | ADAM metallo      |
| 141 | 157 | RRRQLRSAPP  | Furin | >gi 189491763 ref NP_000095.2    | cytochrome P4     |
| 8   | 8   | PPRRKKSAPA  | Furin | >gi 26190608 ref NP_003889.1     | synaptojanin 2    |
| 85  | 119 | GHRTRRYTLF  | Furin | >gi 38490688 ref NP_849144.2     | immunoglobuli     |
| 42  | 42  | TNRPPRSIVT  | Furin | >gi 38490688 ref NP_849144.2     | immunoglobuli     |
| 26  | 36  | LSPEKR SVFA | Furin | >gi 10863961 ref NP_066984.1     | potassium chan    |
| 74  | 89  | PDRLRK CVEQ | Furin | >gi 14251207 ref NP_061868.1     | MOV10-like 1 [I   |
| 82  | 97  | LYRHKKSKFT  | Furin | >gi 157384998 ref NP_002325.2    | low density lip   |
| 29  | 20  | PAKSARSVRA  | Furin | >gi 163659899 ref NP_001104753.1 | insulin-like      |
| 33  | 45  | LWRSFRSVRS  | Furin | >gi 193290160 ref NP_940897.2    | CTAGE family      |
| 31  | 56  | PGDPKRTIGQ  | Furin | >gi 61743978 ref NP_055951.2     | stabilin 1 precu  |
| 39  | 52  | RTRPRRFMDL  | Furin | >gi 88196794 ref NP_001034637.1  | kelch-like 3'     |
| 66  | 97  | LARASRDVAQ  | Furin | >gi 116875831 ref NP_057117.2    | regulator of m    |
| 21  | 22  | SSRLDRSYSY  | Furin | >gi 122937343 ref NP_001073940.1 | platelet er       |
| 118 | 148 | LRRAKRRWAP  | Furin | >gi 148539846 ref NP_001932.2    | desmocollin 3     |
| 26  | 27  | AARFKKFATE  | Furin | >gi 21359816 ref NP_002927.2     | ribonuclease H:   |
| 62  | 100 | VQRQRREMVA  | Furin | >gi 26024206 ref NP_061157.2     | hepatocellular c  |
| 66  | 77  | SSRWRRHQEG  | Furin | >gi 38569233 ref NP_005469.2     | insulin-like 5 pr |
| 45  | 65  | QVRGKRLDGP  | Furin | >gi 40254464 ref NP_002294.2     | leptin receptor   |
| 75  | 115 | RGPARRSVLA  | Furin | >gi 41152506 ref NP_065173.2     | prostaglandin F   |
| 89  | 89  | TRRERRRLMS  | Furin | >gi 41152506 ref NP_065173.2     | prostaglandin F   |
| 84  | 107 | PGRMCRVAGW  | Furin | >gi 4502907 ref NP_001827.1      | chymase 1 mast    |
| 42  | 44  | KKRKARWLRA  | Furin | >gi 45439331 ref NP_982299.1     | porcupine isofo   |
| 100 | 105 | SERQARFSSQ  | Furin | >gi 4885307 ref NP_005285.1      | G protein-couple  |
| 39  | 50  | LCRRSRAASV  | Furin | >gi 9256616 ref NP_061761.1      | protocadherin b   |

|     |                |       |                                                 |
|-----|----------------|-------|-------------------------------------------------|
| 39  | 65 RPRRARQARR  | Furin | >gi 9951913 ref NP_062832.1  G protein-couple   |
| 197 | 265 RARQARRVGG | Furin | >gi 9951913 ref NP_062832.1  G protein-couple   |
| 68  | 80 LVRQKRAWIT  | Furin | >gi 116534898 ref NP_001934.2  desmoglein 2     |
| 28  | 46 PVRAPRSPRA  | Furin | >gi 153281202 ref NP_001092926.2  neuropept     |
| 91  | 99 GQRLRRDVS   | Furin | >gi 153281202 ref NP_001092926.2  neuropept     |
| 69  | 97 KIRRRRHEGP  | Furin | >gi 30425464 ref NP_848615.1  transmembran      |
| 24  | 30 RRRVQRMAEH  | Furin | >gi 7305013 ref NP_004711.2  lysophosphatidic   |
| 174 | 216 SQRSWRLACE | Furin | >gi 88501734 ref NP_000623.2  integrin alpha M  |
| 47  | 51 KMRPARLVPA  | Furin | >gi 9506747 ref NP_061844.1  G protein-couple   |
| 12  | 15 KARGPRSSSA  | Furin | >gi 112734845 ref NP_065933.2  collagen type    |
| 70  | 68 THRWNRFAMI  | Furin | >gi 116008152 ref NP_001846.3  alpha 1 type X   |
| 67  | 65 AHRHRRRGSP  | Furin | >gi 116268095 ref NP_955371.2  spermatid ma     |
| 35  | 39 VPRRKRKVLH  | Furin | >gi 119392077 ref NP_036426.3  Rap guanine n    |
| 6   | 11 PQRLPRSAPP  | Furin | >gi 14277685 ref NP_115783.1  protocadherin     |
| 39  | 44 LDREKRSEYS  | Furin | >gi 14589929 ref NP_061908.1  protocadherin     |
| 40  | 53 PKRPSRQIHK  | Furin | >gi 14589929 ref NP_061908.1  protocadherin     |
| 44  | 55 YRSYRYALQ   | Furin | >gi 14589929 ref NP_061908.1  protocadherin     |
| 170 | 169 LKRRVRSVIL | Furin | >gi 154937357 ref NP_795371.2  taste receptor   |
| 53  | 38 SSRVPRSDGK  | Furin | >gi 16306530 ref NP_006718.2  cadherin 10 ty    |
| 115 | 133 LHRQKRGWMW | Furin | >gi 16306530 ref NP_006718.2  cadherin 10 ty    |
| 25  | 25 DSRFFRYLHT  | Furin | >gi 21450863 ref NP_647538.1  attractin isofor  |
| 64  | 59 HVRIRRDANE  | Furin | >gi 21687224 ref NP_060434.2  solute carrier fa |
| 75  | 88 RSRDARLKE   | Furin | >gi 31542493 ref NP_001343.2  D site of albumi  |
| 50  | 74 RRRTPRPGEQ  | Furin | >gi 38455416 ref NP_001450.2  fms-related tyr   |
| 10  | 12 SRRPRRDAAE  | Furin | >gi 38569471 ref NP_006360.3  MUF1 protein [    |
| 185 | 206 LKRFKRAAGK | Furin | >gi 38569471 ref NP_006360.3  MUF1 protein [    |
| 73  | 54 HVRKLSLEQ   | Furin | >gi 40217803 ref NP_079337.2  leucine rich rep  |
| 27  | 41 RERSKRDYTP  | Furin | >gi 116256485 ref NP_006772.3  chromosome (     |
| 99  | 152 LKRTRKFVVD | Furin | >gi 126362971 ref NP_005981.3  serine/threoni   |
| 43  | 53 NNRVGRQVVT  | Furin | >gi 16936522 ref NP_003385.2  wingless-type N   |
| 78  | 91 KRRSRRQDVR  | Furin | >gi 188497703 ref NP_004177.3  semaphorin 3I    |
| 39  | 55 YSRVGRSVTD  | Furin | >gi 4504683 ref NP_001548.1  interleukin 8 rec  |
| 13  | 20 KSVKKRSVSE  | Furin | >gi 4506267 ref NP_000306.1  parathyroid horr   |
| 105 | 143 LNRSKRSWMW | Furin | >gi 4826673 ref NP_004923.1  cadherin 6 type    |
| 64  | 101 NRRTGRPVEP | Furin | >gi 4826673 ref NP_004923.1  cadherin 6 type    |
| 86  | 110 NSRKLRGTV  | Furin | >gi 7242140 ref NP_006651.2  ClpX caseinolytic  |
| 48  | 56 GARGLRSIME  | Furin | >gi 7242140 ref NP_006651.2  ClpX caseinolytic  |
| 41  | 67 TARIIRNAKG  | Furin | >gi 7656928 ref NP_055297.1  bone morphoger     |
| 34  | 65 RARVARAMSI  | Furin | >gi 19923245 ref NP_004373.2  corticotropin re  |
| 25  | 46 RARCRRALRR  | Furin | >gi 22091448 ref NP_665705.1  GDNF family re    |
| 121 | 143 RSRVCRCARA | Furin | >gi 22091448 ref NP_665705.1  GDNF family re    |



|     |     |            |       |                                  |                    |
|-----|-----|------------|-------|----------------------------------|--------------------|
| 10  | 9   | GSKKKRKFSK | Furin | >gi 32483374 ref NP_006383.2     | nucleolar prote    |
| 75  | 100 | RCRVARSREL | Furin | >gi 45593138 ref NP_660299.2     | leucine rich rep   |
| 29  | 40  | STWSKRSLSQ | Furin | >gi 5902052 ref NP_008842.1      | relaxin 1 prepro   |
| 40  | 47  | HSRASRDSSE | Furin | >gi 94538350 ref NP_001035519.1  | protocadhe         |
| 39  | 57  | SSRNIRSGVH | Furin | >gi 109134327 ref NP_057209.3    | PTD016 protei      |
| 59  | 90  | RQRKPRPLDP | Furin | >gi 110611246 ref NP_071450.2    | xylosyltransfe     |
| 50  | 74  | QGRIARVVLQ | Furin | >gi 113722116 ref NP_079455.3    | plexin A2 [Hor     |
| 48  | 44  | HIRRKRIVGG | Furin | >gi 119392081 ref NP_000195.2    | complement f       |
| 57  | 82  | FERRWRSLRP | Furin | >gi 187937179 ref NP_001073864.2 | apoptosis-         |
| 38  | 65  | SGRVPRSVPR | Furin | >gi 19923279 ref NP_004254.2     | semaphorin W       |
| 55  | 77  | CSRHKRRSKF | Furin | >gi 4758502 ref NP_004123.1      | hyaluronan bindi   |
| 60  | 71  | VSRTGRQVLG | Furin | >gi 4885521 ref NP_005377.1      | neuronatin isofo   |
| 46  | 51  | AHRIKRAEGW | Furin | >gi 91823274 ref NP_006200.3     | autotaxin isofoi   |
| 52  | 47  | AKRPKRKVAP | Furin | >gi 91823274 ref NP_006200.3     | autotaxin isofoi   |
| 43  | 57  | VSRVTRSLDV | Furin | >gi 205360962 ref NP_000287.3    | polycystin 1 is    |
| 89  | 86  | PGRPARVALP | Furin | >gi 205360962 ref NP_000287.3    | polycystin 1 is    |
| 58  | 70  | ALRPRRGSHP | Furin | >gi 136255216 ref NP_997234.3    | proline-rich tr    |
| 66  | 86  | TYRSKRLMKR | Furin | >gi 156616290 ref NP_001096078.1 | collagen ty        |
| 21  | 24  | PPRPFRSFPV | Furin | >gi 156616290 ref NP_001096078.1 | collagen ty        |
| 70  | 84  | LSRVARSGRD | Furin | >gi 156616290 ref NP_001096078.1 | collagen ty        |
| 37  | 42  | SPRVKRRIEN | Furin | >gi 157805480 ref NP_002774.2    | pregnancy spe      |
| 32  | 33  | NGREHRSGEP | Furin | >gi 209571519 ref NP_001129386.1 | cysteine ri        |
| 136 | 218 | RSRARKLADE | Furin | >gi 23200008 ref NP_683710.1     | abhydrolase do     |
| 64  | 90  | KGRGRRDFPE | Furin | >gi 4503945 ref NP_002045.1      | glucagon prepro    |
| 60  | 72  | IKRLKRSPDK | Furin | >gi 4503975 ref NP_000505.1      | glial cell derived |
| 77  | 83  | LSRNRLVSD  | Furin | >gi 4503975 ref NP_000505.1      | glial cell derived |
| 175 | 255 | RARQRRARFV | Furin | >gi 62388888 ref NP_000516.3     | potassium inwa     |
| 33  | 58  | RQRRARFVSK | Furin | >gi 62388888 ref NP_000516.3     | potassium inwa     |
| 88  | 93  | SSRSARKSNF | Furin | >gi 7705421 ref NP_057455.1      | hydroxysteroid (   |
| 76  | 104 | SRVSRRSRGI | Furin | >gi 108796063 ref NP_001007140.2 | insulin-like       |
| 154 | 224 | TQRLRRGLPA | Furin | >gi 108796063 ref NP_001007140.2 | insulin-like       |
| 30  | 39  | PRRPARSVGS | Furin | >gi 11641275 ref NP_071753.1     | potassium fami     |
| 296 | 364 | SSRWGRGFGL | Furin | >gi 13124770 ref NP_076869.1     | vitamin K epoxi    |
| 107 | 156 | RLRVRRSTAE | Furin | >gi 15147240 ref NP_150279.1     | brother of CDO     |
| 81  | 70  | RAFQRRMAGM | Furin | >gi 156231351 ref NP_037521.2    | Niemann-Pick       |
| 34  | 56  | RARFVRFVPL | Furin | >gi 18640734 ref NP_570129.1     | contactin assoc    |
| 45  | 67  | DNRAVRSINE | Furin | >gi 21704277 ref NP_002217.3     | jagged 2 isoforr   |
| 70  | 96  | NKRMARNVLK | Furin | >gi 33589818 ref NP_878907.1     | prolyl 4-hydrox    |
| 31  | 43  | SYRFPRGVS  | Furin | >gi 4505463 ref NP_003623.1      | contactin associa  |
| 120 | 125 | HHSRRCCTCF | Furin | >gi 4557545 ref NP_000105.1      | endothelin 3 isof  |
| 93  | 102 | SFRGKRSAGP | Furin | >gi 4557545 ref NP_000105.1      | endothelin 3 isof  |

|     |     |            |       |                                  |                    |
|-----|-----|------------|-------|----------------------------------|--------------------|
| 122 | 169 | SERNRRGAIT | Furin | >gi 47458048 ref NP_998818.1     | hemojuvelin isc    |
| 116 | 133 | PSPLKRSMSL | Furin | >gi 55742695 ref NP_060498.2     | sterile alpha mc   |
| 47  | 54  | PGRHKRTIPM | Furin | >gi 7661536 ref NP_056496.1      | B9 protein [Hom    |
| 32  | 37  | YNRTRRISQT | Furin | >gi 112799847 ref NP_001026.2    | cardiac muscle     |
| 36  | 51  | PQRSKKAVWH | Furin | >gi 112799847 ref NP_001026.2    | cardiac muscle     |
| 91  | 100 | QRRVRRRLDL | Furin | >gi 148237498 ref NP_055992.1    | deltex 4 homo      |
| 109 | 138 | LNRKYRSHHD | Furin | >gi 31795546 ref NP_036582.2     | solute carrier fa  |
| 66  | 85  | PGRSARPLVQ | Furin | >gi 45433501 ref NP_443078.1     | elastin microfib   |
| 55  | 64  | WNRVARTVDR | Furin | >gi 4557461 ref NP_000742.1      | nicotinic acetylch |
| 79  | 111 | SHRSTRFAAT | Furin | >gi 4758378 ref NP_004460.1      | vascular endothe   |
| 73  | 98  | RIRNVRFSD  | Furin | >gi 56788383 ref NP_996535.2     | myelin oligoder    |
| 115 | 146 | VARERRWQDV | Furin | >gi 122937275 ref NP_001073907.1 | alpha 1 3-galact   |
| 9   | 12  | EARMVRSVKV | Furin | >gi 14149694 ref NP_056428.1     | retina specific p  |
| 11  | 15  | SSRTARSEED | Furin | >gi 154275767 ref NP_001035362.3 | ADAMTS-li          |
| 29  | 30  | GSRHIRLVLK | Furin | >gi 154275767 ref NP_001035362.3 | ADAMTS-li          |
| 23  | 31  | ILRKARSYIK | Furin | >gi 29029537 ref NP_789744.1     | phosphatidylinc    |
| 38  | 58  | QERVPRDWD  | Furin | >gi 4504665 ref NP_000869.1      | interleukin 2 rec  |
| 36  | 44  | EGWWARSVGG | Furin | >gi 110611156 ref NP_006050.3    | laminin gambr      |
| 59  | 77  | LARSHRDTAT | Furin | >gi 110611156 ref NP_006050.3    | laminin gambr      |
| 138 | 175 | STRTRRALSD | Furin | >gi 118918395 ref NP_001073141.1 | fibronectin        |
| 133 | 154 | SGRRLREAVQ | Furin | >gi 221218981 ref NP_063946.2    | N-acylsphingo      |
| 44  | 53  | AQRHRRYKAL | Furin | >gi 24431939 ref NP_079178.2     | DnaJ (Hsp40) ho    |
| 37  | 59  | DRRSQRSEER | Furin | >gi 31317241 ref NP_851826.1     | interleukin 22-k   |
| 74  | 91  | WQRARRFCRD | Furin | >gi 4506875 ref NP_000646.1      | selectin L precu   |
| 77  | 93  | GRRYRRTVGI | Furin | >gi 4507001 ref NP_003049.1      | solute carrier far |
| 183 | 251 | CARHRRSLRL | Furin | >gi 7706200 ref NP_057731.1      | mesenchymal ste    |
| 72  | 85  | TRRMRRDGWP | Furin | >gi 148613856 ref NP_001091974.1 | DEAD box           |
| 51  | 47  | IGRTARSTNK | Furin | >gi 148613856 ref NP_001091974.1 | DEAD box           |
| 245 | 281 | GRRARRGVEV | Furin | >gi 21361873 ref NP_116260.2     | RELT tumor nec     |
| 46  | 57  | VSRSCRAAQA | Furin | >gi 37574726 ref NP_932070.1     | BH3 interacting    |
| 31  | 46  | KMRVWRDSFL | Furin | >gi 38327658 ref NP_940998.1     | sulfatase 2 isof   |
| 35  | 45  | RSRSIRSVAI | Furin | >gi 38327658 ref NP_940998.1     | sulfatase 2 isof   |
| 22  | 22  | PARDDRSTSF | Furin | >gi 122937327 ref NP_001073935.1 | BTB (POZ)          |
| 90  | 114 | RARQIRYSVP | Furin | >gi 14196451 ref NP_114480.1     | protocadherin g    |
| 23  | 15  | PVRLKKKVKQ | Furin | >gi 19882241 ref NP_066013.1     | immunoglobuli      |
| 22  | 31  | RSHSKRKISW | Furin | >gi 19882241 ref NP_066013.1     | immunoglobuli      |
| 49  | 71  | RRRLKRRQEE | Furin | >gi 21361937 ref NP_085044.2     | proline rich 7 (s  |
| 42  | 62  | PSRLKKFQEA | Furin | >gi 116235446 ref NP_849164.2    | LAG1 longevit      |
| 60  | 67  | PSRQKKADEP | Furin | >gi 16418445 ref NP_443185.1     | leucine rich rep   |
| 15  | 27  | SLRKKRLKES | Furin | >gi 16418463 ref NP_443199.1     | MAS1 oncogen       |
| 19  | 21  | TSRIIRSED  | Furin | >gi 21489959 ref NP_653247.1     | immunoglobuli      |

|     |                       |                                                   |
|-----|-----------------------|---------------------------------------------------|
| 180 | 239 MKRKKRVHFFH Furin | >gi 21918872 ref NP_660358.2  lactation elevat    |
| 64  | 79 RGRHRRFRLD Furin   | >gi 21955174 ref NP_665697.1  kinesin family n    |
| 67  | 86 MGRVRRAAQG Furin   | >gi 38708313 ref NP_859069.2  aspartate beta-     |
| 245 | 292 LKRRKRAVNP Furin  | >gi 4501913 ref NP_003803.1  ADAM metallope       |
| 42  | 51 LERTMRSVGL Furin   | >gi 4504079 ref NP_003792.1  glycosylphospha      |
| 39  | 53 PKRVRRQIHA Furin   | >gi 148539835 ref NP_004384.2  dystroglycan 1     |
| 99  | 132 GNRWRRSKRA Furin  | >gi 222446611 ref NP_848660.3  R-spondin fam      |
| 39  | 57 WRRSKRASVYV Furin  | >gi 222446611 ref NP_848660.3  R-spondin fam      |
| 123 | 164 TSRSRRRRRP Furin  | >gi 29029597 ref NP_002079.3  glutamate rece      |
| 87  | 112 RSRRRRRPPGG Furin | >gi 29029597 ref NP_002079.3  glutamate rece      |
| 111 | 128 SRRRRRRPGGP Furin | >gi 29029597 ref NP_002079.3  glutamate rece      |
| 61  | 90 TVRWKRGLDW Furin   | >gi 31377681 ref NP_079085.2  tectonic family     |
| 73  | 95 MPRDRRRLEQ Furin   | >gi 31542845 ref NP_110399.2  gap junction pr     |
| 37  | 38 LGRPARDEGG Furin   | >gi 38348414 ref NP_940972.1  von Willebrand      |
| 16  | 12 WLRKKRIVTG Furin   | >gi 4759146 ref NP_004778.1  slit homolog 2 [H    |
| 49  | 38 PLRSKRKYS Furin    | >gi 4759146 ref NP_004778.1  slit homolog 2 [H    |
| 42  | 49 GKRQPRSNGD Furin   | >gi 51511744 ref NP_055025.2  ecotropic viral i   |
| 133 | 162 ASRGPRSYPH Furin  | >gi 10190672 ref NP_065688.1  fibroblast grow     |
| 73  | 98 SERKKRRRES Furin   | >gi 118582275 ref NP_003093.2  superoxide dis     |
| 22  | 24 PQRQKKAEEK Furin   | >gi 12548785 ref NP_068711.1  gamma-aminok        |
| 132 | 149 KSRLRRRASQ Furin  | >gi 12548785 ref NP_068711.1  gamma-aminok        |
| 30  | 33 VSREDRGAYT Furin   | >gi 148886752 ref NP_055802.1  immunoglobu        |
| 317 | 415 SPRQARRAEP Furin  | >gi 148886752 ref NP_055802.1  immunoglobu        |
| 98  | 119 LVRTRRCVCV Furin  | >gi 167466171 ref NP_001514.2  hyaluronan sy      |
| 102 | 116 VARLRRGQCP Furin  | >gi 4557779 ref NP_000252.1  myocilin [Homo :     |
| 46  | 47 WERPRRPNGD Furin   | >gi 54607033 ref NP_001005731.1  integrin bet     |
| 38  | 28 SSRPVRDDSV Furin   | >gi 6912482 ref NP_036450.1  leucine zipper-EF    |
| 66  | 82 RARGMRALGV Furin   | >gi 6912482 ref NP_036450.1  leucine zipper-EF    |
| 60  | 68 NRRDVRLVDA Furin   | >gi 119709832 ref NP_002326.2  low density lip    |
| 74  | 91 GARRRRCLNG Furin   | >gi 20143973 ref NP_071920.1  hedgehog-inter      |
| 103 | 103 KRRDRRMMSQ Furin  | >gi 20143973 ref NP_071920.1  hedgehog-inter      |
| 137 | 182 GCRARRGLRG Furin  | >gi 21703352 ref NP_072094.1  myofibrillogene     |
| 39  | 50 PRRILRSAWG Furin   | >gi 28559074 ref NP_787033.1  spermine oxida      |
| 61  | 79 TRRTKRTRRP Furin   | >gi 4503693 ref NP_003858.1  fibroblast growth    |
| 89  | 122 RGRCRKSCEH Furin  | >gi 5031701 ref NP_005851.1  follistatin-like 3 g |
| 250 | 323 MHRVARHAAP Furin  | >gi 52353264 ref NP_001005172.1  olfactory re     |
| 40  | 55 QSRSKRGTED Furin   | >gi 134244291 ref NP_004758.3  G-protein cou      |
| 195 | 278 ASRNRRALRD Furin  | >gi 145580617 ref NP_775811.2  fucosyltransfe     |
| 135 | 193 DSRQRRLAA Furin   | >gi 209364544 ref NP_071414.2  calyntenin 2       |
| 67  | 94 SHRWKRNLDF Furin   | >gi 40255005 ref NP_116201.7  plexin domain c     |
| 104 | 101 KRRARRQDVK Furin  | >gi 41406086 ref NP_689967.2  semaphorin 3D       |

|     |     |                  |                                                 |
|-----|-----|------------------|-------------------------------------------------|
| 57  | 77  | WHREKRRQRN Furin | >gi 41406086 ref NP_689967.2  semaphorin 3D     |
| 79  | 83  | NRRHHRDLDE Furin | >gi 41406086 ref NP_689967.2  semaphorin 3D     |
| 47  | 49  | KFRYRRVAEG Furin | >gi 4502261 ref NP_000479.1  serpin peptidase   |
| 69  | 56  | KSRKRRKGKA Furin | >gi 4504619 ref NP_001544.1  insulin-like grow  |
| 43  | 42  | IIRKSRGTST Furin | >gi 8393378 ref NP_059108.1  frizzled 3 [Homo   |
| 23  | 32  | RSRDGRYTPC Furin | >gi 8393378 ref NP_059108.1  frizzled 3 [Homo   |
| 68  | 87  | ITRMKRIFYR Furin | >gi 8923756 ref NP_060872.1  interleukin 26 pr  |
| 59  | 57  | KGRPKRADTF Furin | >gi 30410788 ref NP_006756.2  tumor suppress    |
| 75  | 102 | EKRAKRGNIH Furin | >gi 31542835 ref NP_078913.3  galactose-3-O-s   |
| 78  | 95  | HRRNKKDVNL Furin | >gi 41872703 ref NP_056081.1  sodium/hydrog     |
| 299 | 339 | LERLRRGLAA Furin | >gi 4503413 ref NP_001936.1  heparin-binding    |
| 52  | 63  | LSRDGRKVTV Furin | >gi 62865635 ref NP_003120.2  squalene epoxi    |
| 122 | 160 | AERQRRSELG Furin | >gi 63079680 ref NP_009153.3  zinc fingers and  |
| 59  | 51  | QRRRRRQAER Furin | >gi 109633039 ref NP_569707.2  protein tyrosir  |
| 33  | 38  | IERVKRQKIS Furin | >gi 116235454 ref NP_795366.2  taste receptor   |
| 89  | 115 | FQRKRRGTGY Furin | >gi 194097332 ref NP_004436.2  ephrin recept    |
| 125 | 182 | KDRARRPHFD Furin | >gi 194097332 ref NP_004436.2  ephrin recept    |
| 47  | 37  | KSRAERKTEI Furin | >gi 210147462 ref NP_001034589.2  von Willeb    |
| 14  | 21  | AARLPRGAEA Furin | >gi 30410803 ref NP_835488.1  CUB domain-co     |
| 57  | 51  | PARIGRAVRP Furin | >gi 91823048 ref NP_071329.2  kallikrein 14 pre |
| 31  | 38  | VQRVPRDPST Furin | >gi 119220572 ref NP_001007242.2  zymogen g     |
| 82  | 118 | QFRALRSSGT Furin | >gi 123317872 ref NP_001074023.1  germ cell e   |
| 42  | 53  | QRRWKRTQSQ Furin | >gi 157168355 ref NP_001762.2  CD22 molecul     |
| 44  | 90  | SALHKRQVGD Furin | >gi 157168355 ref NP_001762.2  CD22 molecul     |
| 74  | 104 | SCRYRRLTGD Furin | >gi 23503229 ref NP_036609.1  WW domain bi      |
| 39  | 61  | GYRGRRSPHT Furin | >gi 28466983 ref NP_055077.2  leprecan-like 2   |
| 9   | 15  | PARVCRDLMD Furin | >gi 32140760 ref NP_116277.2  collagen type X   |
| 62  | 62  | PRRPARALHP Furin | >gi 38372935 ref NP_068767.3  brevican isoforr  |
| 100 | 88  | TSRRKRYAEH Furin | >gi 4505469 ref NP_002518.1  neurotrophin 3 i   |
| 57  | 73  | QLRVKRSPGL Furin | >gi 4506453 ref NP_002891.1  retinol-binding p  |
| 89  | 110 | LCRHKRKQLP Furin | >gi 4507753 ref NP_000363.1  tyrosinase precu   |
| 72  | 81  | DYRRIRFVGR Furin | >gi 4758792 ref NP_004544.1  NADH dehydrog      |
| 107 | 122 | LGRAKRAFLP Furin | >gi 10190674 ref NP_065689.1  fibroblast grow   |
| 14  | 27  | PRRHTRSAED Furin | >gi 10190674 ref NP_065689.1  fibroblast grow   |
| 278 | 401 | AGRARRRTPT Furin | >gi 13899338 ref NP_113667.1  activin beta E [H |
| 35  | 48  | GGRPPRSATA Furin | >gi 14589937 ref NP_116567.1  protocadherin {   |
| 209 | 267 | LSRRRRASAP Furin | >gi 156151389 ref NP_079383.2  myc target 1 [   |
| 16  | 18  | SSRRSRSSYT Furin | >gi 156151389 ref NP_079383.2  myc target 1 [   |
| 18  | 37  | GSRYKKAVFR Furin | >gi 195947365 ref NP_001124332.1  hephaestir    |
| 51  | 52  | LRRNRRSILD Furin | >gi 195947365 ref NP_001124332.1  hephaestir    |
| 153 | 178 | RQRRRRLLIK Furin | >gi 20127609 ref NP_071912.2  carbohydrate (I   |

|     |     |             |       |                                  |                    |
|-----|-----|-------------|-------|----------------------------------|--------------------|
| 275 | 359 | EHRMRAGQ    | Furin | >gi 20302153 ref NP_005320.2     | hyaluronan syn     |
| 65  | 74  | CQRVKRVSHS  | Furin | >gi 223029414 ref NP_001138567.1 | HERV-H LT          |
| 187 | 238 | IARARRVLEA  | Furin | >gi 62988346 ref NP_619635.1     | glutamate rece     |
| 201 | 256 | WKRARRAVDK  | Furin | >gi 62988346 ref NP_619635.1     | glutamate rece     |
| 20  | 28  | RHRPRLLQA   | Furin | >gi 62988346 ref NP_619635.1     | glutamate rece     |
| 60  | 98  | ASRGIRPVGR  | Furin | >gi 7705680 ref NP_056977.1      | prolactin releasir |
| 147 | 183 | RCRRPRHLSA  | Furin | >gi 16876451 ref NP_473371.1     | MAS-related GF     |
| 45  | 62  | KVRPRRWKLQ  | Furin | >gi 194306635 ref NP_001093260.2 | PRAME far          |
| 33  | 60  | QRLLRRLAEG  | Furin | >gi 4758822 ref NP_004637.1      | nephrin precursc   |
| 31  | 42  | GRRSRNVST   | Furin | >gi 62988324 ref NP_071376.1     | tenascin N [Hor    |
| 109 | 139 | LGRKKRTLRLG | Furin | >gi 62988324 ref NP_071376.1     | tenascin N [Hor    |
| 77  | 88  | RAPERDVCW   | Furin | >gi 18497288 ref NP_066548.2     | latent transforr   |
| 137 | 177 | RDRRRRELEP  | Furin | >gi 222418611 ref NP_002197.2    | integrin alpha     |
| 98  | 114 | GTRFKRAIFQ  | Furin | >gi 224586907 ref NP_055279.3    | tubulointerstit    |
| 54  | 48  | DGRGKRHATK  | Furin | >gi 224586907 ref NP_055279.3    | tubulointerstit    |
| 329 | 455 | LIRARRSMDE  | Furin | >gi 4507757 ref NP_000541.1      | tyrosinase-relate  |
| 85  | 107 | MLRQRRPWEF  | Furin | >gi 166362724 ref NP_004382.2    | cytochrome P       |
| 62  | 83  | RARKNRSHIP  | Furin | >gi 30795188 ref NP_778234.2     | Williams Beurel    |
| 33  | 46  | RARKNRSQIV  | Furin | >gi 30795188 ref NP_778234.2     | Williams Beurel    |
| 81  | 102 | FRRSKRAQTQ  | Furin | >gi 40254837 ref NP_006774.2     | gap junction pr    |
| 52  | 48  | RLRALRSLDL  | Furin | >gi 40254971 ref NP_079101.2     | podocan-like 1     |
| 58  | 74  | HQRAKRAVSH  | Furin | >gi 4557251 ref NP_001101.1      | ADAM metallope     |
| 13  | 24  | NLRMKRDTSL  | Furin | >gi 4557251 ref NP_001101.1      | ADAM metallope     |
| 54  | 67  | LLRKKRTTSA  | Furin | >gi 4557251 ref NP_001101.1      | ADAM metallope     |
| 74  | 113 | LRRSKRRWVI  | Furin | >gi 29570800 ref NP_817089.1     | cadherin-like 2    |
| 48  | 48  | WQRVDRDVAP  | Furin | >gi 42544239 ref NP_001919.2     | complement fa      |
| 61  | 47  | AHREPRLVGG  | Furin | >gi 44662834 ref NP_004235.3     | CD163 antigen      |
| 155 | 209 | DCRCKRGMKK  | Furin | >gi 47078235 ref NP_001486.4     | GDNF family re     |
| 77  | 109 | PSRRRRPERV  | Furin | >gi 53692189 ref NP_001120.3     | adipocyte enha     |
| 151 | 213 | AARLLRDQEA  | Furin | >gi 7657104 ref NP_056529.1      | G0/G1switch 2 [I   |
| 25  | 22  | SSREVRVAP   | Furin | >gi 112789555 ref NP_598377.3    | ADAM metallc       |
| 62  | 87  | VYRQKRSMEE  | Furin | >gi 112789555 ref NP_598377.3    | ADAM metallc       |
| 31  | 32  | RPRSRKIAES  | Furin | >gi 112789555 ref NP_598377.3    | ADAM metallc       |
| 46  | 54  | SGRGKRYSYK  | Furin | >gi 112789555 ref NP_598377.3    | ADAM metallc       |
| 55  | 76  | DSRHRLNVYA  | Furin | >gi 124256491 ref NP_071417.2    | galactose-3-O      |
| 41  | 76  | NSRSARSVAR  | Furin | >gi 124256491 ref NP_071417.2    | galactose-3-O      |
| 24  | 19  | ISRIKRGNTT  | Furin | >gi 125625352 ref NP_055694.3    | P2Y14 receptc      |
| 98  | 107 | RRRFYRPVAV  | Furin | >gi 13899273 ref NP_113630.1     | transmembran       |
| 32  | 40  | PRRAKRFASL  | Furin | >gi 157427675 ref NP_005090.3    | ADAM metallc       |
| 67  | 56  | RYRFIRSVMS  | Furin | >gi 27436986 ref NP_751948.1     | potassium volta    |
| 188 | 216 | GRRSRAVSV   | Furin | >gi 4504733 ref NP_003595.1      | insulin receptor : |

|     |     |            |       |                                                 |
|-----|-----|------------|-------|-------------------------------------------------|
| 68  | 68  | KSLKKRSYFG | Furin | >gi 4504733 ref NP_003595.1  insulin receptor : |
| 37  | 43  | EYRGQRSVKA | Furin | >gi 52487191 ref NP_055866.1  thioredoxin dor   |
| 37  | 39  | LDRSKRNIIG | Furin | >gi 52487191 ref NP_055866.1  thioredoxin dor   |
| 78  | 114 | SFRDRRAAGS | Furin | >gi 55743098 ref NP_004360.2  alpha 3 type VI   |
| 37  | 41  | NRRHPRSPPR | Furin | >gi 56788359 ref NP_079284.2  thrombospondi     |
| 44  | 46  | YNRPPREEGK | Furin | >gi 56788359 ref NP_079284.2  thrombospondi     |
| 58  | 96  | RSRQVRCVGN | Furin | >gi 56788359 ref NP_079284.2  thrombospondi     |
| 45  | 81  | QRRQRRGEER | Furin | >gi 10835203 ref NP_001127.1  advanced glyco    |
| 30  | 54  | RHRKKKRQSL | Furin | >gi 109809759 ref NP_821079.3  leucine rich re  |
| 129 | 190 | QSRRKKILDV | Furin | >gi 11641231 ref NP_071731.1  ectodysplasin A   |
| 27  | 31  | VLSKRVDVGS | Furin | >gi 148539840 ref NP_004397.2  deleted in mal   |
| 7   | 7   | VERIKRQHSS | Furin | >gi 148743793 ref NP_002537.3  osteoproteger    |
| 226 | 261 | ARRSRRGLFA | Furin | >gi 150417984 ref NP_061985.2  ATP-binding c:   |
| 26  | 27  | KARLKKIKDD | Furin | >gi 39725942 ref NP_068602.2  twinkle [Homo     |
| 15  | 22  | KSRTKRSSTT | Furin | >gi 4557481 ref NP_000383.1  ATP-binding cass   |
| 34  | 40  | LSRSSRSNGR | Furin | >gi 4557481 ref NP_000383.1  ATP-binding cass   |
| 169 | 227 | ANRSRRGVSE | Furin | >gi 5453808 ref NP_006170.1  neurotrophin 5 p   |
| 94  | 133 | QHRLKRYHSQ | Furin | >gi 5803109 ref NP_006803.1  osteosarcoma ar    |
| 26  | 37  | KHKKKRVVPK | Furin | >gi 5803109 ref NP_006803.1  osteosarcoma ar    |
| 72  | 98  | QVRRRRFERA | Furin | >gi 67190163 ref NP_005798.2  proteoglycan 4    |
| 63  | 70  | RRRFERAIGP | Furin | >gi 67190163 ref NP_005798.2  proteoglycan 4    |
| 73  | 99  | FERVSRSVRK | Furin | >gi 20544129 ref NP_068750.2  DEAH (Asp-Glu-    |
| 54  | 58  | VSRSVRKVIV | Furin | >gi 20544129 ref NP_068750.2  DEAH (Asp-Glu-    |
| 38  | 54  | PSRHQRTENI | Furin | >gi 21264332 ref NP_060884.1  sialyltransferas  |
| 80  | 87  | PTRARRTTIY | Furin | >gi 21264332 ref NP_060884.1  sialyltransferas  |
| 57  | 75  | KNRFLRSKTL | Furin | >gi 21264332 ref NP_060884.1  sialyltransferas  |
| 72  | 106 | RARSRRSPRA | Furin | >gi 22218341 ref NP_671724.1  matrix metallo    |
| 70  | 79  | PRRARRDPRA | Furin | >gi 38045915 ref NP_002572.2  pregnancy-asso    |
| 58  | 62  | RRRQQREARG | Furin | >gi 38045915 ref NP_002572.2  pregnancy-asso    |
| 101 | 92  | LNRSKKDFEA | Furin | >gi 4504867 ref NP_003949.1  ring finger protei |
| 102 | 121 | SRRLKRAVSE | Furin | >gi 4506269 ref NP_002811.1  parathyroid horr   |
| 191 | 241 | TARFRRGLDN | Furin | >gi 112807182 ref NP_078876.2  transmembrar     |
| 107 | 104 | RGRRRRLVWT | Furin | >gi 194272192 ref NP_001120860.2  double ho     |
| 124 | 141 | EGRRKRTAVT | Furin | >gi 194272192 ref NP_001120860.2  double ho     |
| 210 | 206 | QNRARHPGQ  | Furin | >gi 194272192 ref NP_001120860.2  double ho     |
| 24  | 46  | NSRKGRYKAF | Furin | >gi 50897270 ref NP_001002907.1  olfactory re   |
| 72  | 77  | RPRFRREVEK | Furin | >gi 53988378 ref NP_005814.2  mesothelin isof   |
| 36  | 37  | PSRMIRTNEA | Furin | >gi 7657359 ref NP_055176.1  contactin 5 isof   |
| 11  | 16  | ALRLRRSSSP | Furin | >gi 14270499 ref NP_115269.1  protocadherin {   |
| 30  | 47  | KRREKKAAL  | Furin | >gi 157364937 ref NP_057107.3  OTU domain c     |
| 78  | 84  | AGRSRKEVEL | Furin | >gi 18201909 ref NP_542413.1  vascular cell ad  |

|     |     |                   |                                                 |
|-----|-----|-------------------|-------------------------------------------------|
| 27  | 29  | RSRPDRSSQG Furin  | >gi 221316599 ref NP_001810.2  chromogranin     |
| 56  | 62  | KGRHHRGRGG Furin  | >gi 221316599 ref NP_001810.2  chromogranin     |
| 36  | 41  | RLRGPRAVST Furin  | >gi 23503271 ref NP_699176.1  transmembran      |
| 47  | 61  | LLRKKRPGQA Furin  | >gi 31083053 ref NP_061764.2  ceroid-lipofusci  |
| 38  | 45  | RGRVRRAGQG Furin  | >gi 6042196 ref NP_003784.2  cathepsin F [Hon   |
| 118 | 120 | HRRQKRDIW Furin   | >gi 166362713 ref NP_001786.2  cadherin 5 ty    |
| 53  | 72  | RRLLRKQARA Furin  | >gi 166362713 ref NP_001786.2  cadherin 5 ty    |
| 45  | 58  | EMRKKRYDRK Furin  | >gi 22218355 ref NP_671730.1  WAP four-disulf   |
| 43  | 43  | RHEKKRKFVK Furin  | >gi 42558283 ref NP_003995.2  gap junction pr   |
| 43  | 42  | LFRVKRSLGE Furin  | >gi 52317102 ref NP_001004725.1  olfactory re   |
| 81  | 126 | RHRTYRWLSA Furin  | >gi 6681764 ref NP_004993.1  NADH dehydroge     |
| 47  | 31  | PVREKKDVPL Furin  | >gi 89903008 ref NP_055905.2  neurofascin iso   |
| 34  | 44  | IHRNKRKVFS Furin  | >gi 9845285 ref NP_063938.1  cytochrome P450    |
| 39  | 68  | RHCVRRSPCA Furin  | >gi 110347457 ref NP_001400.3  EGF-like-dom     |
| 68  | 78  | RWRRRRYAVA Furin  | >gi 30023826 ref NP_835230.1  G-protein coup    |
| 118 | 125 | PARDKRALKQ Furin  | >gi 31542671 ref NP_060838.2  liver regenerati  |
| 68  | 68  | NERIRRDVVRV Furin | >gi 31542747 ref NP_653190.2  catechol-O-met    |
| 47  | 69  | LSRAGRSAPL Furin  | >gi 4506141 ref NP_002766.1  HtrA serine pept   |
| 92  | 130 | SSLLRSLTH Furin   | >gi 32490559 ref NP_054764.2  low density lipc  |
| 52  | 44  | HHRHHRAAAT Furin  | >gi 38327535 ref NP_005534.2  insulin-like 3 pr |
| 40  | 48  | TGRVGRSLPT Furin  | >gi 4502165 ref NP_001629.1  apolipoprotein F   |
| 155 | 166 | PERKRRDVMQ Furin  | >gi 4557665 ref NP_000866.1  insulin-like grow  |
| 30  | 35  | IARQKRILVN Furin  | >gi 63025190 ref NP_001017978.1  chromosom      |
| 49  | 68  | RRRERRTLSV Furin  | >gi 124244083 ref NP_036298.2  F-box protein    |
| 57  | 79  | LKRQKRNKIP Furin  | >gi 13325075 ref NP_002817.2  quiescin Q6 sulf  |
| 28  | 30  | WHLSKRDTGA Furin  | >gi 13325075 ref NP_002817.2  quiescin Q6 sulf  |
| 58  | 72  | VRRVGRSSKQ Furin  | >gi 13325075 ref NP_002817.2  quiescin Q6 sulf  |
| 106 | 150 | RRRTRRPGEF Furin  | >gi 13699859 ref NP_000952.1  prostaglandin I   |
| 84  | 115 | PARLARRAHR Furin  | >gi 13699859 ref NP_000952.1  prostaglandin I   |
| 159 | 210 | ERRRRRAAAT Furin  | >gi 150010572 ref NP_001092759.1  SH3 doma      |
| 122 | 168 | KNRQRRGCFR Furin  | >gi 193788560 ref NP_057258.3  cerebral endo    |
| 97  | 116 | WERYCRGVSA Furin  | >gi 20270343 ref NP_620150.1  ADP-ribosylatio   |
| 55  | 67  | SSREIRQAFK Furin  | >gi 24308127 ref NP_061854.1  DnaJ (Hsp40) hc   |
| 108 | 108 | DNRHLRSLEP Furin  | >gi 30425563 ref NP_848665.1  reticulon 4 rece  |
| 152 | 150 | RYRHKRLSYQ Furin  | >gi 4507545 ref NP_003263.1  G protein-couple   |
| 39  | 55  | KRRFRRQDVR Furin  | >gi 4759092 ref NP_004627.1  semaphorin 3B is   |
| 24  | 40  | AERGPRSATH Furin  | >gi 4759092 ref NP_004627.1  semaphorin 3B is   |
| 11  | 11  | DSRLSRDSLQ Furin  | >gi 58219064 ref NP_001010846.1  Src homolo     |
| 45  | 54  | NERLKRVEDQ Furin  | >gi 5902022 ref NP_008955.1  PL6 protein [Hon   |
| 74  | 80  | SPRPRRRLGP Furin  | >gi 73476377 ref NP_001026977.1  LBXCOR1 hc     |
| 123 | 111 | QERKARYAIQ Furin  | >gi 73476377 ref NP_001026977.1  LBXCOR1 hc     |

|     |     |            |       |                                                 |
|-----|-----|------------|-------|-------------------------------------------------|
| 25  | 41  | LGLERRSVYT | Furin | >gi 145699139 ref NP_694953.2  cartilage inter  |
| 58  | 65  | GLRDARSVRD | Furin | >gi 145699139 ref NP_694953.2  cartilage inter  |
| 33  | 44  | KCRTKKSSVQ | Furin | >gi 27262626 ref NP_758424.1  ATP-binding cas   |
| 80  | 80  | IIRDQRSVLA | Furin | >gi 46249410 ref NP_004735.2  lecithin retinol  |
| 53  | 85  | TLRMRRYADA | Furin | >gi 11034841 ref NP_066567.1  growth hormor     |
| 70  | 87  | RARLGRQVDS | Furin | >gi 11034841 ref NP_066567.1  growth hormor     |
| 66  | 62  | SIRHARFGKK | Furin | >gi 116235485 ref NP_620711.3  delta-notch-lik  |
| 120 | 136 | IPRFRRIRGE | Furin | >gi 4504237 ref NP_003603.1  semaphorin 7A is   |
| 62  | 80  | RRVLRDVT   | Furin | >gi 52627151 ref NP_001005276.1  olfactory re   |
| 39  | 48  | SSRPRRGIIF | Furin | >gi 61966717 ref NP_001013652.1  arylacetami    |
| 392 | 461 | ATRARRAVQK | Furin | >gi 7705274 ref NP_057691.1  armadillo repeat   |
| 25  | 37  | SQRSKRPSTD | Furin | >gi 124107606 ref NP_002246.5  killer cell imm  |
| 42  | 49  | LGRPARSATG | Furin | >gi 16933557 ref NP_003728.1  dachsous 1 pre    |
| 25  | 25  | GGRTRREAPR | Furin | >gi 16933557 ref NP_003728.1  dachsous 1 pre    |
| 19  | 29  | EPREQRDVER | Furin | >gi 20070376 ref NP_612637.1  solute carrier fa |
| 56  | 76  | RIRIERVIGA | Furin | >gi 27734955 ref NP_775926.1  EPH receptor A    |
| 51  | 72  | ADREKRAAEQ | Furin | >gi 4758230 ref NP_004206.1  estrogen receptc   |
| 26  | 30  | CERKGRSYGS | Furin | >gi 5031825 ref NP_005658.1  ring finger protei |
| 53  | 59  | RGRQPRVDFV | Furin | >gi 224591414 ref NP_001013715.2  low densit    |
| 112 | 124 | TRRRWREVEE | Furin | >gi 28416909 ref NP_775087.1  interleukin 28 r  |
| 16  | 21  | FLRLKRRVKS | Furin | >gi 29126245 ref NP_795367.1  taste receptor    |
| 47  | 55  | CGRICRDIPK | Furin | >gi 32307109 ref NP_542181.1  WAP four-disulf   |
| 62  | 65  | LVRNRRITV  | Furin | >gi 38788416 ref NP_005550.2  laminin alpha 1   |
| 24  | 22  | GRRKKKCKIC | Furin | >gi 59797060 ref NP_001012301.1  arylsulfatas   |
| 42  | 55  | PRDARRSPDQ | Furin | >gi 8922112 ref NP_061111.1  carbohydrate sul   |
| 69  | 72  | SIRDKRKQRQ | Furin | >gi 8922277 ref NP_060492.1  transmembrane      |
| 18  | 26  | FSRDSRSSGG | Furin | >gi 149363636 ref NP_036533.2  plexin B2 [Hor   |
| 91  | 99  | NKRVKRDVLV | Furin | >gi 149363636 ref NP_036533.2  plexin B2 [Hor   |
| 29  | 50  | KRRQKRDTTH | Furin | >gi 149363636 ref NP_036533.2  plexin B2 [Hor   |
| 117 | 125 | TSRSNRFWSM | Furin | >gi 223278335 ref NP_001138376.1  C-type lect   |
| 83  | 128 | KVRLRRASWV | Furin | >gi 23503291 ref NP_699191.1  adenomatosis p    |
| 51  | 72  | ERRHYRPTGY | Furin | >gi 23503291 ref NP_699191.1  adenomatosis p    |
| 124 | 181 | IKRSRRGIFI | Furin | >gi 4504657 ref NP_003844.1  interleukin 18 re  |
| 80  | 83  | RYRHKRIPPE | Furin | >gi 46560555 ref NP_997196.1  transmembran      |
| 28  | 34  | FSRAYRSSMR | Furin | >gi 76096366 ref NP_694566.3  phospholipase l   |
| 35  | 35  | KPRPKRSKRQ | Furin | >gi 11497043 ref NP_068367.1  ADAM metallo      |
| 96  | 124 | PKRSKRQLRR | Furin | >gi 11497043 ref NP_068367.1  ADAM metallo      |
| 44  | 78  | LRRYPRNVEE | Furin | >gi 11497043 ref NP_068367.1  ADAM metallo      |
| 58  | 59  | NYREQRSNGL | Furin | >gi 11497043 ref NP_068367.1  ADAM metallo      |
| 54  | 63  | KIRGKRFRPR | Furin | >gi 11497043 ref NP_068367.1  ADAM metallo      |
| 59  | 73  | STRSKRSTLL | Furin | >gi 148225659 ref NP_055851.1  endonuclease     |



|     |                      |                                                  |
|-----|----------------------|--------------------------------------------------|
| 40  | 78 LQRSKRGVWV Furin  | >gi 16306532 ref NP_001788.2  cadherin 11 ty     |
| 61  | 51 DPRSGRSANA Furin  | >gi 31377650 ref NP_116169.2  transmembran       |
| 112 | 148 HNRPRRDCVA Furin | >gi 54792100 ref NP_001973.2  erbB-3 isoform     |
| 28  | 27 RSRSPRPRGD Furin  | >gi 54792100 ref NP_001973.2  erbB-3 isoform     |
| 184 | 235 MNRRRRHSPP Furin | >gi 54792100 ref NP_001973.2  erbB-3 isoform     |
| 35  | 41 KWRMKRESLM Furin  | >gi 6005701 ref NP_009099.1  ATP-binding cass    |
| 33  | 28 GRRKRVNT Furin    | >gi 13325064 ref NP_001399.1  cadherin EGF L     |
| 59  | 86 ARRQRRHPEL Furin  | >gi 13325064 ref NP_001399.1  cadherin EGF L     |
| 27  | 31 TGYPKRSAGE Furin  | >gi 166706897 ref NP_477518.2  olfactomedin      |
| 35  | 45 PARVARVARE Furin  | >gi 19482158 ref NP_066382.1  desert hedgehc     |
| 71  | 92 ESRGARGVRV Furin  | >gi 30089937 ref NP_821174.1  transmembran       |
| 45  | 57 KSRIVRSLMP Furin  | >gi 42740907 ref NP_976084.1  clusterin isofor   |
| 100 | 144 RSRHLRANMT Furin | >gi 4503391 ref NP_000789.1  dopamine recept     |
| 42  | 67 PFRYKRKMTQ Furin  | >gi 4503391 ref NP_000789.1  dopamine recept     |
| 32  | 40 PPRSKRVLWD Furin  | >gi 4506775 ref NP_003782.1  membrane-boun       |
| 42  | 34 KSRPKRRKPR Furin  | >gi 4506775 ref NP_003782.1  membrane-boun       |
| 35  | 36 KRRKPRVKRP Furin  | >gi 4506775 ref NP_003782.1  membrane-boun       |
| 54  | 44 KPRVKRPQLM Furin  | >gi 4506775 ref NP_003782.1  membrane-boun       |
| 19  | 20 RNRKKKTEGT Furin  | >gi 54792129 ref NP_563615.3  discoidin CUB a    |
| 79  | 92 THRIMRDSGL Furin  | >gi 54792136 ref NP_055897.1  follistatin-like 4 |
| 67  | 88 RNRLRKDQLK Furin  | >gi 6005864 ref NP_009213.1  ring finger protei  |
| 170 | 251 SRRARRFAQI Furin | >gi 10862703 ref NP_066124.1  ret proto-oncog    |
| 63  | 82 PSKLRKRSHEL Furin | >gi 151301096 ref NP_079107.6  trimethylguan     |
| 106 | 114 SHRQVRYLEK Furin | >gi 151301096 ref NP_079107.6  trimethylguan     |
| 42  | 51 CARPRRSPAQ Furin  | >gi 15826850 ref NP_055081.1  hematopoietic      |
| 8   | 8 QRRKYRSNKG Furin   | >gi 4507587 ref NP_001233.1  tumor necrosis fi   |
| 60  | 81 YCRKKRISAN Furin  | >gi 50511936 ref NP_067674.2  Fc fragment of     |
| 71  | 87 NRRLKRFSMV Furin  | >gi 6912238 ref NP_036226.1  peroxiredoxin 5 i   |
| 26  | 27 PRRFRRSVPR Furin  | >gi 7019519 ref NP_037403.1  proprotein conve    |
| 48  | 78 PRLLRAADH Furin   | >gi 7019519 ref NP_037403.1  proprotein conve    |
| 46  | 68 KARRKRYISQ Furin  | >gi 7705676 ref NP_056970.1  protease inhibitc   |
| 29  | 55 NSRKKREITE Furin  | >gi 119395742 ref NP_000201.2  integrin alpha    |
| 17  | 19 KNRSCRILHK Furin  | >gi 13624335 ref NP_112221.1  olfactory recep    |
| 64  | 89 KERSKRSPGQ Furin  | >gi 149999382 ref NP_001556.2  small inducibl    |
| 22  | 27 SSRIKRRKSL Furin  | >gi 157743288 ref NP_001099050.1  gamma-an       |
| 130 | 142 MHRKFRSGLI Furin | >gi 19923761 ref NP_004888.2  multiple inositc   |
| 89  | 106 LSRKRPLMV Furin  | >gi 21361361 ref NP_006835.2  ilvB (bacterial a  |
| 60  | 66 LARNARIVHL Furin  | >gi 223005864 ref NP_937791.2  carboxypeptid     |
| 46  | 43 MDRVKKEWEE Furin  | >gi 4502147 ref NP_001633.1  amyloid beta (A4    |
| 57  | 62 GRRTKRAQSP Furin  | >gi 12545402 ref NP_071772.1  intercellular adl  |
| 48  | 53 GSRPARGAGP Furin  | >gi 30089980 ref NP_003732.2  chordin [Homo      |

|     |     |            |       |                                  |                    |
|-----|-----|------------|-------|----------------------------------|--------------------|
| 30  | 42  | HRRTPRSSSA | Furin | >gi 4758662 ref NP_004892.1      | ectonucleoside t   |
| 25  | 22  | CPRRARGADA | Furin | >gi 4885641 ref NP_005440.1      | Fas apoptotic inf  |
| 105 | 120 | LSRRKRHDIA | Furin | >gi 98985828 ref NP_055080.2     | ADAM metallo       |
| 75  | 104 | AARGARLVSE | Furin | >gi 14195607 ref NP_037472.2     | protocadherin l    |
| 27  | 30  | PGREKKSNSP | Furin | >gi 21717832 ref NP_663633.1     | sperm equatori     |
| 83  | 94  | QLRYRRCVGV | Furin | >gi 223671861 ref NP_001138724.1 | compleme           |
| 37  | 44  | PSRETRYVEL | Furin | >gi 69354859 ref NP_001100.2     | ADAM metallo       |
| 79  | 130 | RQTRRHLDH  | Furin | >gi 69354859 ref NP_001100.2     | ADAM metallo       |
| 19  | 21  | HSVRKRDLOT | Furin | >gi 73747889 ref NP_003174.3     | a disintegrin an   |
| 95  | 119 | VHRVKRRADP | Furin | >gi 73747889 ref NP_003174.3     | a disintegrin an   |
| 72  | 93  | DHRFYRYMGR | Furin | >gi 73747889 ref NP_003174.3     | a disintegrin an   |
| 65  | 67  | SKNRNRHIEK | Furin | >gi 81158224 ref NP_005001.3     | neuronal cell ac   |
| 243 | 365 | PSRARRRSAE | Furin | >gi 46409372 ref NP_997253.1     | G protein-coup     |
| 62  | 69  | PGRFDRQIFI | Furin | >gi 5802970 ref NP_006787.1      | AFG3 ATPase fan    |
| 24  | 37  | RRRSSKDTST | Furin | >gi 11038637 ref NP_015566.1     | NMDA receptor      |
| 45  | 45  | SKRRVRDKDG | Furin | >gi 148728186 ref NP_005743.3    | C-type lectin d    |
| 48  | 48  | LWRLKRQPCA | Furin | >gi 18765709 ref NP_057616.2     | inositol polyphc   |
| 71  | 95  | PTRRRRLLQQ | Furin | >gi 224600454 ref NP_073583.3    | MOCO sulphu        |
| 133 | 176 | HRRQRRSHVL | Furin | >gi 26190610 ref NP_115917.1     | ST6 beta-galact    |
| 48  | 53  | RFRGKREAGL | Furin | >gi 26190610 ref NP_115917.1     | ST6 beta-galact    |
| 554 | 718 | SRRWGRYEGG | Furin | >gi 28872814 ref NP_060363.2     | semaphorin 4G      |
| 104 | 129 | PSRLRRMNGN | Furin | >gi 28872814 ref NP_060363.2     | semaphorin 4G      |
| 36  | 35  | LHRRRRYKKK | Furin | >gi 40217825 ref NP_115605.2     | slit and trk like  |
| 51  | 63  | RHRKKRNGLT | Furin | >gi 4506569 ref NP_002932.1      | roundabout 1 isc   |
| 24  | 27  | DARTDRSSDR | Furin | >gi 4506569 ref NP_002932.1      | roundabout 1 isc   |
| 163 | 211 | RARRRRLRTA | Furin | >gi 61966761 ref NP_001013675.1  | leucine rich       |
| 65  | 62  | ARRHKRETLK | Furin | >gi 73747885 ref NP_003465.3     | ADAM metallo       |
| 58  | 72  | PSRPPRGFQP | Furin | >gi 73747885 ref NP_003465.3     | ADAM metallo       |
| 23  | 31  | SSSKKRSNGL | Furin | >gi 11497047 ref NP_068369.1     | ADAM metallo       |
| 46  | 65  | GSRFSKSADE | Furin | >gi 21071001 ref NP_001135.3     | autocrine motil    |
| 30  | 48  | GKRFKKNAGL | Furin | >gi 221307573 ref NP_001073954.2 | zinc finger        |
| 112 | 152 | LSRHRRIHSG | Furin | >gi 221307573 ref NP_001073954.2 | zinc finger        |
| 37  | 73  | VHRQRRDLLN | Furin | >gi 23097238 ref NP_690849.1     | carbohydrate si    |
| 61  | 80  | RKRLRRRREG | Furin | >gi 32698940 ref NP_872365.1     | transmembran       |
| 61  | 87  | RLRRRREGGA | Furin | >gi 32698940 ref NP_872365.1     | transmembran       |
| 38  | 38  | RFRHLRSKVT | Furin | >gi 4503383 ref NP_000785.1      | dopamine recept    |
| 94  | 147 | PSRFRKAYKP | Furin | >gi 4505011 ref NP_002309.1      | lysyl oxidase-like |
| 116 | 151 | LDRLRRVSHQ | Furin | >gi 4505021 ref NP_002328.1      | low density lipop  |
| 91  | 83  | YSRFVRDACA | Furin | >gi 169790956 ref NP_076915.2    | methionine sy      |
| 56  | 80  | RSRELRLQME | Furin | >gi 17157993 ref NP_477512.1     | olfactomedin 2     |
| 127 | 137 | CCRQRREKGA | Furin | >gi 31543106 ref NP_005572.2     | basal cell adhes   |

|     |                 |       |                                                 |
|-----|-----------------|-------|-------------------------------------------------|
| 75  | 117 FARHLREVGD  | Furin | >gi 34147487 ref NP_598368.2  protein O-fucos   |
| 48  | 59 SNSLKRDVSL   | Furin | >gi 38045908 ref NP_000218.2  laminin alpha 3   |
| 299 | 368 AARARRFSGL  | Furin | >gi 45446740 ref NP_001597.2  ATP-binding cas   |
| 56  | 65 RLRQKRIHSA   | Furin | >gi 4557657 ref NP_001536.1  immature colon     |
| 46  | 84 SGRRRRSGAD   | Furin | >gi 61743973 ref NP_443150.3  SORCS receptor    |
| 79  | 101 ASRSPRGVLR  | Furin | >gi 61743973 ref NP_443150.3  SORCS receptor    |
| 77  | 84 PGRRGRAGSD   | Furin | >gi 89276751 ref NP_000084.3  alpha 1 type V c  |
| 64  | 105 ASRTRRNIDA  | Furin | >gi 89276751 ref NP_000084.3  alpha 1 type V c  |
| 70  | 79 SAREKRDVQP   | Furin | >gi 110735433 ref NP_065139.2  CD177 molecu     |
| 23  | 27 TGKVKRSQGD   | Furin | >gi 122056685 ref NP_037490.2  peptidylargini   |
| 88  | 111 HSRVRRRAIPR | Furin | >gi 13899332 ref NP_113664.1  cysteine-rich se  |
| 20  | 19 RRKRKRKRK    | Furin | >gi 187167261 ref NP_001119600.1  prokinetici   |
| 49  | 53 RKRKRKRKEV   | Furin | >gi 187167261 ref NP_001119600.1  prokinetici   |
| 115 | 150 AWRSGRVVGS  | Furin | >gi 210031196 ref NP_001034859.2  transmem      |
| 39  | 62 KGRVRRAVRI   | Furin | >gi 26051273 ref NP_742054.1  voltage-gated p   |
| 44  | 50 SSREKRRSAD   | Furin | >gi 4885057 ref NP_005152.1  angiotensin II rec |
| 65  | 64 SREKRRSADI   | Furin | >gi 4885057 ref NP_005152.1  angiotensin II rec |
| 75  | 106 YFRKRRGTKG  | Furin | >gi 49574514 ref NP_000891.2  matrix Gla prot   |
| 161 | 167 SYRKRRALLI  | Furin | >gi 46048469 ref NP_689812.2  major facilitato  |
| 82  | 84 FWRKTRSTHT   | Furin | >gi 54607080 ref NP_001862.2  pancreatic carb   |
| 60  | 70 TTRKKNRVNF   | Furin | >gi 67190748 ref NP_009224.2  complement co     |
| 40  | 50 NNRQIRGLEE   | Furin | >gi 67190748 ref NP_009224.2  complement co     |
| 92  | 114 RNRRRREAPK  | Furin | >gi 67190748 ref NP_009224.2  complement co     |
| 120 | 168 CPRQRALER   | Furin | >gi 67190748 ref NP_009224.2  complement co     |
| 16  | 15 LWRSFRSVTS   | Furin | >gi 90819229 ref NP_758441.2  cutaneous T-ce    |
| 32  | 32 RFRRKRKTKT   | Furin | >gi 110347441 ref NP_006520.2  glycine recept   |
| 30  | 45 INVRKRNVES   | Furin | >gi 20070384 ref NP_612642.1  phosphoglycera    |
| 30  | 49 WARYARWAGA   | Furin | >gi 21166380 ref NP_620060.1  neurexin 2 isofc  |
| 105 | 128 EVRSKRREMQ  | Furin | >gi 21166380 ref NP_620060.1  neurexin 2 isofc  |
| 47  | 47 RSRDLRGLAE   | Furin | >gi 21166380 ref NP_620060.1  neurexin 2 isofc  |
| 61  | 66 KPRNKKSMD    | Furin | >gi 8922631 ref NP_060669.1  exonuclease 3'-5   |
| 90  | 134 RSRPRLSDR   | Furin | >gi 4503199 ref NP_000490.1  cytochrome P450    |
| 32  | 62 RRRQKRQNK    | Furin | >gi 4504021 ref NP_002054.1  glycine receptor   |
| 148 | 184 EERRRRERDD  | Furin | >gi 4507173 ref NP_003110.1  spastic paraplegi  |
| 34  | 51 PGRLDRHVFI   | Furin | >gi 4507173 ref NP_003110.1  spastic paraplegi  |
| 44  | 48 RKRKRRCMRH   | Furin | >gi 7110719 ref NP_036374.1  dickkopf homolo    |
| 23  | 24 GSRSSRSGSS   | Furin | >gi 13376115 ref NP_079045.1  adipocyte-speci   |
| 118 | 132 HIRRKRYALT  | Furin | >gi 149999365 ref NP_072086.2  matrix metallic  |
| 78  | 102 RSRKRRAVLT  | Furin | >gi 26051248 ref NP_742085.1  tumor necrosis    |
| 82  | 125 LLRTRRSWVW  | Furin | >gi 32880206 ref NP_071923.2  cadherin-like 24  |
| 36  | 48 NPREKKDVLA   | Furin | >gi 4506175 ref NP_002773.1  pregnancy specif   |

|     |     |                  |                                                           |
|-----|-----|------------------|-----------------------------------------------------------|
| 18  | 17  | SPRVKRPIEN Furin | >gi 4506175 ref NP_002773.1  pregnancy specif             |
| 41  | 41  | QGVSKRHVRI Furin | >gi 4557369 ref NP_001191.1  bone morphoger               |
| 90  | 91  | HVRISRSLHQ Furin | >gi 4557369 ref NP_001191.1  bone morphoger               |
| 32  | 56  | HKREKRQAKH Furin | >gi 4557369 ref NP_001191.1  bone morphoger               |
| 39  | 41  | INRKKKVWDY Furin | >gi 46488937 ref NP_997468.1  interferon alphas           |
| 99  | 144 | HYRKKRWAER Furin | >gi 5032247 ref NP_005788.1  myelin protein zero          |
| 64  | 67  | MRRLKRRLVP Furin | >gi 52317241 ref NP_001004706.1  olfactory receptor       |
| 30  | 44  | RFRRKRKNKD Furin | >gi 110347433 ref NP_001036008.1  glycine receptor        |
| 89  | 120 | TQRTARAVSP Furin | >gi 11231177 ref NP_068352.1  leukocyte-associated        |
| 48  | 56  | PGRPWKSVSE Furin | >gi 156231037 ref NP_001095886.1  kininogen               |
| 90  | 89  | QNRWKRQNFH Furin | >gi 209571555 ref NP_001129396.1  von Willebrand          |
| 71  | 100 | ARLLRRFQKG Furin | >gi 40068042 ref NP_059997.2  lymphocyte antigen          |
| 32  | 47  | SAVLKRDVDI Furin | >gi 45827765 ref NP_001063.2  UDP glycosyltransferase     |
| 63  | 59  | VNRKARFIHD Furin | >gi 47419930 ref NP_001888.2  chondroitin sulfate         |
| 69  | 89  | NCRCKRGMKK Furin | >gi 4885269 ref NP_005255.1  GDNF family receptor         |
| 46  | 42  | PSRTKRLAIF Furin | >gi 49355781 ref NP_116248.2  abhydrolase domain          |
| 56  | 57  | PKRIKKSAMI Furin | >gi 5032099 ref NP_005622.1  smoothed [Homo               |
| 31  | 39  | KKRRKRKKEV Furin | >gi 5032099 ref NP_005622.1  smoothed [Homo               |
| 119 | 140 | FHRNRRVTRR Furin | >gi 86990448 ref NP_940947.3  chromosome 1                |
| 58  | 78  | TRRKGRCVEP Furin | >gi 86990448 ref NP_940947.3  chromosome 1                |
| 21  | 30  | SSRLKRLFLA Furin | >gi 9966903 ref NP_065112.1  mannosidase alpha            |
| 37  | 39  | ISKKKRMAMA Furin | >gi 148234741 ref NP_001091085.1  G protein-coupled       |
| 147 | 170 | CSRAARGTIG Furin | >gi 167857792 ref NP_005009.2  programmed cell death      |
| 56  | 66  | KDRKRRSQDG Furin | >gi 187607071 ref NP_116011.2  ligand of num1             |
| 34  | 44  | KRDHRRSVDS Furin | >gi 24234735 ref NP_705869.1  semaphorin 6D               |
| 32  | 41  | SLRQRKSVNA Furin | >gi 64085121 ref NP_000360.2  thyroid stimulating         |
| 46  | 53  | LRRGKRHLQG Furin | >gi 9055278 ref NP_061324.1  adherens junction            |
| 55  | 57  | VARVRKSKGK Furin | >gi 163659856 ref NP_015564.4  glutamate receptor         |
| 34  | 48  | AGRISRSE Furin   | >gi 21614525 ref NP_001439.2  glypican 4 [Homo            |
| 65  | 85  | SMRANRIVNA Furin | >gi 24797151 ref NP_037523.2  dimethylglycine             |
| 22  | 23  | TTRQRRSSGH Furin | >gi 66348148 ref NP_997224.2  zona pellucida glycoprotein |
| 39  | 51  | SARNKRSHSG Furin | >gi 98986321 ref NP_861454.2  gliomedin [Homo             |
| 43  | 35  | RSRCIRAFCR Furin | >gi 110347431 ref NP_001036009.1  latent transmembrane    |
| 51  | 62  | PSVRKRQVSL Furin | >gi 110347431 ref NP_001036009.1  latent transmembrane    |
| 63  | 94  | SYRCVRDCDP Furin | >gi 110347431 ref NP_001036009.1  latent transmembrane    |
| 68  | 70  | ICRRKRYRNF Furin | >gi 112181177 ref NP_001001524.2  transmembrane           |
| 39  | 46  | VPRQRRPTGP Furin | >gi 118498339 ref NP_597714.2  EMI domain containing      |
| 43  | 56  | RRRQRRPHGQ Furin | >gi 167860120 ref NP_001108105.1  phospholipase           |
| 26  | 22  | PPRRARVTDA Furin | >gi 47132557 ref NP_997647.1  fibronectin 1 isoform       |
| 50  | 39  | RRRRRRKKAR Furin | >gi 67003570 ref NP_001019849.1  leucine rich repeat      |
| 55  | 73  | RRRRKKARGP Furin | >gi 67003570 ref NP_001019849.1  leucine rich repeat      |

|     |     |            |       |                               |                   |
|-----|-----|------------|-------|-------------------------------|-------------------|
| 121 | 133 | AARKRRQSEG | Furin | >gi 112420992 ref NP_775960.4 | crumbs homol      |
| 46  | 78  | RTREKRGPSG | Furin | >gi 145553959 ref NP_060597.4 | elaC homolog      |
| 39  | 42  | ERREKRELRQ | Furin | >gi 145553959 ref NP_060597.4 | elaC homolog      |
| 52  | 53  | RKRNKKQNSQ | Furin | >gi 157278100 ref NP_149102.3 | phosphonofor      |
| 30  | 29  | KRRKKRIFNL | Furin | >gi 157278100 ref NP_149102.3 | phosphonofor      |
| 103 | 133 | HQKKKRAACK | Furin | >gi 157311649 ref NP_002490.2 | neogenin hom      |
| 38  | 55  | LNRPKRYNSG | Furin | >gi 4503649 ref NP_000124.1   | coagulation fact  |
| 77  | 109 | PARYRRGFH  | Furin | >gi 4758766 ref NP_004775.1   | N-deacetylase/N   |
| 77  | 113 | SSRRKRDLG  | Furin | >gi 51558724 ref NP_112217.2  | ADAM metallo      |
| 39  | 44  | RSLSRRSISK | Furin | >gi 51558724 ref NP_112217.2  | ADAM metallo      |
| 25  | 33  | ERRKKRSTGV | Furin | >gi 126507087 ref NP_001192.2 | bone morpho       |
| 63  | 70  | ASHKKRSARD | Furin | >gi 21265037 ref NP_055058.1  | ADAM metallo      |
| 45  | 53  | KKRSARDVSS | Furin | >gi 21265037 ref NP_055058.1  | ADAM metallo      |
| 77  | 107 | TMRRRRHAGE | Furin | >gi 21265037 ref NP_055058.1  | ADAM metallo      |
| 39  | 46  | KRRAKREEKK | Furin | >gi 88758613 ref NP_036204.2  | CD93 antigen p    |
| 17  | 15  | KWRFDRSSGP | Furin | >gi 28195390 ref NP_689829.2  | tripartite motif  |
| 23  | 26  | AQRTKRKPSI | Furin | >gi 39930315 ref NP_009155.1  | neurexophilin 4   |
| 38  | 53  | AARAKKIFGW | Furin | >gi 39930315 ref NP_009155.1  | neurexophilin 4   |
| 66  | 81  | RKRSKRRDAN | Furin | >gi 40217817 ref NP_443142.1  | slit and trk like |
| 33  | 47  | PSRLVRESSG | Furin | >gi 4585710 ref NP_002381.2   | ADAM metallo      |
| 61  | 58  | RLRRKRQVRR | Furin | >gi 4585710 ref NP_002381.2   | ADAM metallo      |
| 64  | 88  | NIRRGSRGGA | Furin | >gi 4585710 ref NP_002381.2   | ADAM metallo      |
| 53  | 68  | MWRKNRSFYA | Furin | >gi 126273559 ref NP_057497.3 | plasma carbox     |
| 51  | 38  | PRRPARSGGP | Furin | >gi 18765711 ref NP_055159.2  | four jointed bo   |
| 82  | 109 | SNRLARFADG | Furin | >gi 18765711 ref NP_055159.2  | four jointed bo   |
| 15  | 22  | RLRPLRDAGG | Furin | >gi 18765711 ref NP_055159.2  | four jointed bo   |
| 61  | 55  | GYRGKRATTV | Furin | >gi 4505881 ref NP_000292.1   | plasminogen [Hc   |
| 50  | 71  | YVRVSRFVTW | Furin | >gi 4505881 ref NP_000292.1   | plasminogen [Hc   |
| 38  | 62  | PLRPAREVDR | Furin | >gi 94536846 ref NP_612634.3  | synaptotagmin     |
| 34  | 65  | NARKIRTVGN | Furin | >gi 28373122 ref NP_783200.1  | contactin 4 isof  |
| 50  | 62  | KSRPVRDCDD | Furin | >gi 4503689 ref NP_000499.1   | fibrinogen alpha  |
| 31  | 62  | ARRAKRKVTR | Furin | >gi 4503905 ref NP_003848.1   | galanin receptor  |
| 41  | 39  | SRRSIRSSQN | Furin | >gi 47080099 ref NP_001873.2  | corticotropin re  |
| 45  | 51  | PGRPYRAIDF | Furin | >gi 6041667 ref NP_001913.2   | dopachrome tau    |
| 39  | 52  | AARVPRTVLP | Furin | >gi 61743918 ref NP_000488.3  | cytochrome P4!    |
| 32  | 36  | AIREKRAKIK | Furin | >gi 24497519 ref NP_005898.2  | mannosidase a     |
| 36  | 58  | WSVTKRDVLD | Furin | >gi 27477134 ref NP_079199.2  | nucleoporin 21!   |
| 72  | 80  | ISRRQRRVPG | Furin | >gi 34734071 ref NP_000806.2  | gamma-aminok      |
| 68  | 72  | SRRQRRVPGN | Furin | >gi 34734071 ref NP_000806.2  | gamma-aminok      |
| 36  | 44  | RWRRGRAARH | Furin | >gi 41350216 ref NP_061982.3  | beta-1 4-mann     |
| 42  | 52  | RGRAARHVVA | Furin | >gi 41350216 ref NP_061982.3  | beta-1 4-mann     |

|     |     |             |       |                                  |                                          |
|-----|-----|-------------|-------|----------------------------------|------------------------------------------|
| 31  | 36  | SSRQPRPAGV  | Furin | >gi 4759116 ref NP_004686.1      | solute carrier far                       |
| 42  | 59  | AERRVRIVSR  | Furin | >gi 11128043 ref NP_061744.1     | protocadherin 8                          |
| 73  | 100 | KSRQRRQVWK  | Furin | >gi 116174738 ref NP_064714.2    | pappalysin 2 isoform 1                   |
| 65  | 62  | RQVWKRRAED  | Furin | >gi 116174738 ref NP_064714.2    | pappalysin 2 isoform 2                   |
| 45  | 44  | KHRVKKSPPE  | Furin | >gi 116174738 ref NP_064714.2    | pappalysin 2 isoform 3                   |
| 52  | 69  | LQRQKRSINL  | Furin | >gi 126091152 ref NP_001072.2    | cubilin [Homo sapiens]                   |
| 115 | 133 | MSRLARTCGR  | Furin | >gi 126091152 ref NP_001072.2    | cubilin [Homo sapiens]                   |
| 142 | 157 | PSRQNRGFRA  | Furin | >gi 126091152 ref NP_001072.2    | cubilin [Homo sapiens]                   |
| 40  | 52  | SNRKVREAYL  | Furin | >gi 15991813 ref NP_258428.1     | membrane metalloprotease 11              |
| 21  | 32  | LRRQKKGVVP  | Furin | >gi 23957680 ref NP_705843.1     | ral guanine nucleotide exchange factor 1 |
| 95  | 116 | KERRPRGTMQ  | Furin | >gi 4504541 ref NP_000859.1      | 5-hydroxytryptamine receptor 2A          |
| 122 | 150 | LERHKRVHSG  | Furin | >gi 51972182 ref NP_001004304.1  | zinc finger protein 100                  |
| 61  | 83  | LLRHKRMCOG  | Furin | >gi 51972182 ref NP_001004304.1  | zinc finger protein 100                  |
| 15  | 9   | KARPEKSVNK  | Furin | >gi 54607137 ref NP_057472.2     | T-cell receptor gamma chain              |
| 30  | 31  | KVRKSRSKSK  | Furin | >gi 93277096 ref NP_667338.3     | limbin [Homo sapiens]                    |
| 51  | 60  | PRRPMRPVGH  | Furin | >gi 100913220 ref NP_001847.3    | alpha 1 type X collagen                  |
| 19  | 18  | FSRCARSSFT  | Furin | >gi 116006951 ref NP_443124.3    | polycystin 1-like 1                      |
| 73  | 91  | DARHKRGRGD  | Furin | >gi 16507239 ref NP_006513.1     | wingless-type 5 metalloprotease          |
| 128 | 156 | AGRHVRSYNH  | Furin | >gi 4758360 ref NP_004456.1      | fibroblast growth factor receptor 3      |
| 43  | 56  | PRRPRRPRRP  | Furin | >gi 62865887 ref NP_115940.2     | G protein-coupled receptor 10            |
| 99  | 95  | ASRNRHVTE   | Furin | >gi 160358850 ref NP_001103824.1 | zona pellucida glycoprotein 1            |
| 24  | 22  | QEREKRSISD  | Furin | >gi 23308591 ref NP_694542.1     | chromosome 4 protein                     |
| 112 | 112 | LKRSGRDSGY  | Furin | >gi 33598968 ref NP_005349.3     | LIM domain only 1                        |
| 50  | 67  | PSRQSRAPSK  | Furin | >gi 34304379 ref NP_899068.1     | inversin isoform 1                       |
| 37  | 38  | HMRQMRSASI  | Furin | >gi 41393556 ref NP_078917.2     | mannosidase alpha 1-6                    |
| 23  | 25  | VRRNKRSKSN  | Furin | >gi 4503449 ref NP_001390.1      | ectodysplasin A1                         |
| 135 | 165 | HRRRRRGLEC  | Furin | >gi 4504699 ref NP_002183.1      | inhibin beta A precursor                 |
| 88  | 98  | DKRVKRLLM   | Furin | >gi 10190748 ref NP_066025.1     | CEGP1 protein                            |
| 251 | 285 | QGRRRRPERG  | Furin | >gi 104294888 ref NP_891555.2    | fms-related tyrosine kinase 1            |
| 43  | 56  | RRRPERGARG  | Furin | >gi 104294888 ref NP_891555.2    | fms-related tyrosine kinase 1            |
| 30  | 18  | RRRPPRSPDH  | Furin | >gi 167003331 ref NP_000825.2    | N-methyl-D-aspartate receptor 1          |
| 12  | 4   | SIRMKRYILH  | Furin | >gi 221316650 ref NP_005223.4    | ephrin receptor 2                        |
| 111 | 146 | AWRSRRSEER  | Furin | >gi 28376668 ref NP_777586.1     | transmembrane protein 16                 |
| 116 | 122 | RSALKRPVEQ  | Furin | >gi 55953076 ref NP_005258.2     | connexin 50 [Homo sapiens]               |
| 13  | 21  | RYRAQRFWSW  | Furin | >gi 7019563 ref NP_037402.1      | testes-specific protein                  |
| 213 | 303 | HQRRRRRAVPV | Furin | >gi 110735441 ref NP_620687.2    | ADAM metalloprotease 1                   |
| 34  | 25  | CLRHKRSLLR  | Furin | >gi 110735441 ref NP_620687.2    | ADAM metalloprotease 1                   |
| 142 | 168 | QARAKRVSWD  | Furin | >gi 5032223 ref NP_005752.1      | plexin C1 [Homo sapiens]                 |
| 35  | 73  | KRRTRRQDIR  | Furin | >gi 5174673 ref NP_006071.1      | semaphorin 3A precursor                  |
| 42  | 63  | KGRNRRTHEF  | Furin | >gi 5174673 ref NP_006071.1      | semaphorin 3A precursor                  |
| 62  | 75  | FERAPRSVGQ  | Furin | >gi 5174673 ref NP_006071.1      | semaphorin 3A precursor                  |

|     |     |            |       |                                                 |
|-----|-----|------------|-------|-------------------------------------------------|
| 33  | 40  | LRRRRRFVPV | Furin | >gi 110735435 ref NP_056534.2  collagen type    |
| 77  | 62  | HIRKRRSTDF | Furin | >gi 20302168 ref NP_619542.1  toll-like receptc |
| 102 | 121 | ITRYKRKSDE | Furin | >gi 21362112 ref NP_071903.2  limb region 1 pr  |
| 163 | 149 | DSRQKRSIHE | Furin | >gi 66346695 ref NP_001990.2  fibrillin 2 precu |
| 297 | 345 | AARRRRSVQL | Furin | >gi 115298678 ref NP_000055.2  complement c     |
| 68  | 100 | CQRRTRFISL | Furin | >gi 115298678 ref NP_000055.2  complement c     |
| 36  | 54  | PGRAQRSAGA | Furin | >gi 157266298 ref NP_000470.2  anti-Mullerian   |
| 68  | 91  | EFRHKRKVFE | Furin | >gi 157951718 ref NP_001103233.1  GSG1-like     |
| 46  | 84  | PSGFRRSMDQ | Furin | >gi 165932391 ref NP_001006606.2  family with   |
| 36  | 65  | KGRGKRRREK | Furin | >gi 20149543 ref NP_002623.2  placental growt   |
| 50  | 97  | RRRARRGGGS | Furin | >gi 38524591 ref NP_787078.1  intramembrane     |
| 57  | 63  | VSRARRVTDA | Furin | >gi 42794612 ref NP_620123.2  myeloma overe     |
| 113 | 128 | MSRTRRYLS  | Furin | >gi 4505487 ref NP_002529.1  occludin [Homo :   |
| 90  | 98  | KGRAGRSKRT | Furin | >gi 4505487 ref NP_002529.1  occludin [Homo :   |
| 35  | 46  | AGRSKRTEQD | Furin | >gi 4505487 ref NP_002529.1  occludin [Homo :   |
| 39  | 39  | DSRVMRWNSK | Furin | >gi 21313638 ref NP_060646.2  leucine-rich rep  |
| 5   | 3   | QRRKKKGKAD | Furin | >gi 27502411 ref NP_758863.1  CD46 antigen c    |
| 31  | 34  | FSRVKKSVEV | Furin | >gi 10834980 ref NP_000581.1  interleukin 9 pr  |
| 104 | 115 | VNRNKKSIAY | Furin | >gi 13376042 ref NP_079004.1  dermal papilla c  |
| 15  | 17  | SSRNFRFLSS | Furin | >gi 14717403 ref NP_114088.2  protocadherin a   |
| 21  | 43  | IFRKRRPYGS | Furin | >gi 153792095 ref NP_071370.2  N-acetylgalact   |
| 50  | 62  | TSRTKRFVSE | Furin | >gi 153792351 ref NP_008968.4  ADAM metallic    |
| 74  | 97  | RARFRRLWPC | Furin | >gi 4503907 ref NP_003605.1  galanin receptor   |
| 64  | 98  | RHRARRALRR | Furin | >gi 4503907 ref NP_003605.1  galanin receptor   |
| 79  | 98  | QHRQGRSHHL | Furin | >gi 4506261 ref NP_000950.1  prostaglandin F r  |
| 37  | 57  | SSRPRRSTSP | Furin | >gi 52421790 ref NP_149132.2  mitogen-activat   |
| 38  | 56  | VERFKRDPNQ | Furin | >gi 52421790 ref NP_149132.2  mitogen-activat   |
| 225 | 282 | GERSRRLAEQ | Furin | >gi 114842389 ref NP_065935.2  myosin heavy     |
| 75  | 83  | MHRKKRLEPT | Furin | >gi 13375656 ref NP_078794.1  UL16 binding pi   |
| 28  | 36  | LGRAKRFLRK | Furin | >gi 223029412 ref NP_001073868.2  otoconin 9    |
| 57  | 89  | RLRARREALR | Furin | >gi 22538497 ref NP_115693.2  DnaJ (Hsp40) hc   |
| 29  | 41  | RSHLKRDTED | Furin | >gi 4506115 ref NP_000303.1  protein C [Homo    |
| 52  | 67  | RSVRKRSPWL | Furin | >gi 50878302 ref NP_001002901.1  Fc receptor    |
| 55  | 52  | TWRPRRSIVF | Furin | >gi 57232740 ref NP_005459.2  N-acetylated al   |
| 51  | 68  | ERRMKRFRVD | Furin | >gi 5729947 ref NP_006672.1  neuromedin U [t    |
| 42  | 56  | KRRFRRQDIR | Furin | >gi 9910362 ref NP_064548.1  semaphorin sem     |
| 34  | 36  | HNRTPREVEA | Furin | >gi 9910362 ref NP_064548.1  semaphorin sem     |
| 58  | 58  | KSRPVRGIHT | Furin | >gi 11761629 ref NP_068657.1  fibrinogen alph   |
| 60  | 67  | ARRHGRDLYR | Furin | >gi 12232389 ref NP_073571.1  methyltransfer    |
| 31  | 29  | PSRVARLLSA | Furin | >gi 223029426 ref NP_008932.2  solute carrier t |
| 42  | 56  | LLRERRADHV | Furin | >gi 27436953 ref NP_525023.2  ATP-binding cas   |

|     |                      |                                                 |
|-----|----------------------|-------------------------------------------------|
| 39  | 43 CPRMKRKIER Furin  | >gi 31543630 ref NP_005406.3  solute carrier fa |
| 34  | 37 WLRSKKAVDW Furin  | >gi 31543630 ref NP_005406.3  solute carrier fa |
| 41  | 69 HFRSIRSTGS Furin  | >gi 4502427 ref NP_001710.1  bone morphoger     |
| 58  | 67 PSSSRDSSW Furin   | >gi 4504099 ref NP_001495.1  chemokine (C-X-    |
| 49  | 58 GCRKDRGASK Furin  | >gi 4506835 ref NP_002980.1  small inducible c  |
| 119 | 131 WVRSKRSLL Furin  | >gi 5453611 ref NP_006130.1  CD28 antigen pre   |
| 21  | 21 VARNHRDAGA Furin  | >gi 68508957 ref NP_001257.4  carboxylestera    |
| 86  | 110 PRRSRRKLMV Furin | >gi 18699732 ref NP_057260.2  stromal cell der  |
| 43  | 76 SSRNARNVSQ Furin  | >gi 21362052 ref NP_078809.2  carbohydrate (f   |
| 77  | 90 DSMKKRDLSA Furin  | >gi 22749259 ref NP_689828.1  poly (ADP-ribos   |
| 17  | 19 NLRIKRDSQG Furin  | >gi 24041035 ref NP_077719.2  notch 2 prepro    |
| 39  | 47 GSRRKKSLSE Furin  | >gi 24041035 ref NP_077719.2  notch 2 prepro    |
| 36  | 57 EGRVRRAAAE Furin  | >gi 29550838 ref NP_057632.2  golgi membran     |
| 68  | 96 VPRLLRDTQQ Furin  | >gi 51972210 ref NP_001004318.1  FLJ16165 pr    |
| 106 | 129 LNRGRRSEDQ Furin | >gi 5454048 ref NP_006370.1  semaphorin 3C [    |
| 70  | 64 TSRKRRVLTTP Furin | >gi 8923758 ref NP_060883.1  carbohydrate sul   |
| 159 | 149 LKRFARMIEQ Furin | >gi 151301213 ref NP_057445.3  acid phosphat    |
| 59  | 79 LSRPRRLSTA Furin  | >gi 19913375 ref NP_612116.1  G6B protein iso   |
| 21  | 33 HGRIPREVSE Furin  | >gi 216547790 ref NP_001136005.1  SH2 doma      |
| 125 | 165 SHMKRRSVTM Furin | >gi 216547790 ref NP_001136005.1  SH2 doma      |
| 53  | 73 SRRKPRDYTI Furin  | >gi 41584202 ref NP_958932.1  G protein-coup    |
| 218 | 275 DFRRRRSFRR Furin | >gi 4506259 ref NP_000949.1  prostaglandin E r  |
| 17  | 28 RRRSFRRRIAG Furin | >gi 4506259 ref NP_000949.1  prostaglandin E r  |
| 34  | 28 RARVVRELLQ Furin  | >gi 118150678 ref NP_001071174.1  epithelial c  |
| 26  | 41 RVRSRRWKVK Furin  | >gi 145580631 ref NP_859052.3  quiescin Q6 su   |
| 40  | 54 PKRRRRGAPF Furin  | >gi 153946393 ref NP_002438.2  macrophage s     |
| 38  | 29 PSRCVTRICK Furin  | >gi 167000402 ref NP_068705.2  gamma-aminc      |
| 85  | 87 TKRLKRHPPEE Furin | >gi 167000402 ref NP_068705.2  gamma-aminc      |
| 280 | 348 SARRARDMSS Furin | >gi 190014607 ref NP_115925.2  netrin G2 [Hor   |
| 89  | 119 CRRKRRNLET Furin | >gi 206597539 ref NP_775867.2  solute carrier i |
| 38  | 38 VPRMRRPPGG Furin  | >gi 223029449 ref NP_056207.3  neural prolifer  |
| 102 | 145 RARLSRGTRP Furin | >gi 4757956 ref NP_004053.1  cadherin 16 prec   |
| 36  | 52 CRRKPRDYTI Furin  | >gi 224809316 ref NP_001139243.1  G protein-    |
| 30  | 41 FARIKKWLEH Furin  | >gi 25777734 ref NP_003739.2  aldehyde dehyd    |
| 182 | 231 PLRRKRSAAL Furin | >gi 4507157 ref NP_003096.1  sortilin-related r |
| 60  | 77 LHRVGRGVSI Furin  | >gi 71361647 ref NP_776256.2  vomeronasal 1     |
| 72  | 101 SSRKSRWAKL Furin | >gi 71361647 ref NP_776256.2  vomeronasal 1     |
| 42  | 60 AARPRRRYYP Furin  | >gi 119392083 ref NP_000187.3  hydroxysteroid   |
| 52  | 60 ESQKKRSAQY Furin  | >gi 126517478 ref NP_653252.3  peroxidase h     |
| 112 | 116 ARRNRRAFGD Furin | >gi 21536376 ref NP_005493.2  ATP-binding cas   |
| 64  | 63 MWRKNRSKNQ Furin  | >gi 221316749 ref NP_001861.2  carboxypeptid    |



|     |     |                  |                                                 |
|-----|-----|------------------|-------------------------------------------------|
| 50  | 66  | TTRKNRSTAS Furin | >gi 41350305 ref NP_620426.2  neurexin 3 isofo  |
| 59  | 76  | EGRLKRDLAT Furin | >gi 4506911 ref NP_000014.1  sarcoglycan alph   |
| 39  | 40  | QSRIRRMWND Furin | >gi 6912464 ref NP_036434.1  latrophilin 2 prec |
| 66  | 87  | ILRSKRYVHL Furin | >gi 100816407 ref NP_078961.3  Bardet-Biedl s   |
| 75  | 86  | PKDQKRSLES Furin | >gi 148886760 ref NP_001092092.1  nanos hon     |
| 31  | 34  | WLRFIRGVVD Furin | >gi 155722983 ref NP_057376.2  TNF receptor-i   |
| 43  | 48  | LIRKLRDVLQ Furin | >gi 155722983 ref NP_057376.2  TNF receptor-i   |
| 51  | 52  | RARCYSRCET Furin | >gi 27764882 ref NP_060662.2  leprecan-like 1   |
| 79  | 118 | PMGRRRGMKD Furin | >gi 115387099 ref NP_001694.2  brain-specific   |
| 96  | 107 | AKREKRWSVS Furin | >gi 115387099 ref NP_001694.2  brain-specific   |
| 121 | 186 | SRRRARVVM Furin  | >gi 11545887 ref NP_071429.1  neuropeptide F    |
| 39  | 37  | KPRPARSVSK Furin | >gi 156616294 ref NP_443122.3  peptidoglycan    |
| 42  | 43  | IHRIPRSREV Furin | >gi 21450685 ref NP_659425.1  asparagine-link   |
| 37  | 58  | VARFYRSRKK Furin | >gi 32307132 ref NP_066923.3  NFS1 nitrogen f   |
| 89  | 115 | KKRTKRLTAQ Furin | >gi 39812181 ref NP_653278.2  N-acetylglucosa   |
| 30  | 35  | TSRFKRQTSY Furin | >gi 4502649 ref NP_001757.1  CD1D antigen pr    |
| 26  | 30  | PMLEKRSVGC Furin | >gi 4506951 ref NP_003024.1  ST3 beta-galacto   |
| 54  | 78  | LRRFWRSTGF Furin | >gi 110611239 ref NP_000194.2  alpha-L-iduror   |
| 17  | 32  | KSRSPRSPPG Furin | >gi 209571537 ref NP_006239.3  proline-rich pr  |
| 26  | 31  | KSRSSRSPPG Furin | >gi 209571537 ref NP_006239.3  proline-rich pr  |
| 36  | 32  | KRSARSPPG Furin  | >gi 209571537 ref NP_006239.3  proline-rich pr  |
| 38  | 39  | SVRPAREVGD Furin | >gi 41327726 ref NP_000738.2  nicotinic acetyl  |
| 59  | 74  | EKRKKRSTKK Furin | >gi 42741655 ref NP_000236.2  met proto-oncc    |
| 63  | 106 | PRLLRSNYF Furin  | >gi 4505089 ref NP_003471.1  microfibrillar ass |
| 101 | 110 | LRRTKRGWMW Furin | >gi 90193626 ref NP_057363.3  cadherin 9 type   |
| 59  | 100 | PNRSRRHSPH Furin | >gi 10092621 ref NP_065391.1  oncostatin M pi   |
| 168 | 217 | ENRALRLVDG Furin | >gi 194018748 ref NP_006716.3  CD6 molecule     |
| 39  | 48  | KRRSVRFISN Furin | >gi 42794271 ref NP_981932.1  iodotyrosine de   |
| 54  | 58  | MWRKTRSHTA Furin | >gi 4502997 ref NP_001859.1  carboxypeptidas    |
| 81  | 99  | HHRPKRGWVW Furin | >gi 4826671 ref NP_004925.1  cadherin 18 type   |
| 55  | 46  | LTRRRRFSRT Furin | >gi 4826671 ref NP_004925.1  cadherin 18 type   |
| 38  | 29  | RRRFSRTVQD Furin | >gi 4826671 ref NP_004925.1  cadherin 18 type   |
| 23  | 36  | RTRIKRSRKL Furin | >gi 5174387 ref NP_006008.1  prominin 1 isofo   |
| 50  | 56  | PARMKRAGRV Furin | >gi 62388877 ref NP_001014447.1  carboxypep     |
| 52  | 68  | KRRNQDAMI Furin  | >gi 78486578 ref NP_001030582.1  boLA-like 3 i  |
| 36  | 51  | RRRARRHAAD Furin | >gi 11038659 ref NP_067610.1  ADAM metallo      |
| 83  | 108 | MRRRRRKQRK Furin | >gi 114431216 ref NP_612358.3  tumor protein    |
| 31  | 27  | KQRKKKAWIY Furin | >gi 114431216 ref NP_612358.3  tumor protein    |
| 95  | 103 | SRRVKRSRRR Furin | >gi 114431216 ref NP_612358.3  tumor protein    |
| 156 | 172 | LKRQKRQLWD Furin | >gi 14165276 ref NP_115787.1  esophageal can    |
| 59  | 52  | SSRRFRAALG Furin | >gi 153945852 ref NP_079534.2  G7c protein [F   |

|     |     |             |       |                                                 |
|-----|-----|-------------|-------|-------------------------------------------------|
| 150 | 167 | SCRRARSPHD  | Furin | >gi 209977029 ref NP_001129687.1  neurotrop     |
| 59  | 92  | PARRKRLPEM  | Furin | >gi 21536398 ref NP_647475.1  angiopoietin-lik  |
| 22  | 23  | RKLLLRDADD  | Furin | >gi 4557325 ref NP_000032.1  apolipoprotein E   |
| 53  | 62  | KRRGKRSPKS  | Furin | >gi 50400088 ref NP_660357.2  upper zone of g   |
| 418 | 499 | HSRRRRSMDP  | Furin | >gi 64276808 ref NP_922932.2  ADAM metallo      |
| 115 | 153 | HHRQKRSVSI  | Furin | >gi 64276808 ref NP_922932.2  ADAM metallo      |
| 134 | 152 | SSRRRRSIQN  | Furin | >gi 115529484 ref NP_598000.2  CD109 antiger    |
| 48  | 56  | LVRKKRKPEE  | Furin | >gi 27262634 ref NP_751896.1  nuclear autoant   |
| 131 | 141 | DSRHSRQVLL  | Furin | >gi 32469517 ref NP_862830.1  adhesion molec    |
| 90  | 107 | EKRQRRQERR  | Furin | >gi 118343649 ref NP_054906.2  HSPC171 prot     |
| 43  | 70  | PARSVRLGGP  | Furin | >gi 209862845 ref NP_001129494.1  nuclear fac   |
| 43  | 54  | NGRRKRSPTQ  | Furin | >gi 209862845 ref NP_001129494.1  nuclear fac   |
| 83  | 117 | DGRRRKSASD  | Furin | >gi 38372909 ref NP_057688.2  jumonji domain    |
| 72  | 88  | KSRRKRQIYG  | Furin | >gi 6005882 ref NP_009104.1  protease serine    |
| 99  | 100 | WIRVKRTHVP  | Furin | >gi 6005882 ref NP_009104.1  protease serine    |
| 191 | 227 | RALRKRDVSV  | Furin | >gi 38683827 ref NP_055087.2  ADAM metallo      |
| 16  | 30  | SSRSVRPVEF  | Furin | >gi 4505111 ref NP_002370.1  matrilin 1 cartila |
| 62  | 59  | KAVERRSVNK  | Furin | >gi 4506913 ref NP_000223.1  sarcoglycan beta   |
| 137 | 185 | SARKMRLGDA  | Furin | >gi 116805340 ref NP_002038.2  glycyl-tRNA sy   |
| 14  | 27  | LRRAKRSVHF  | Furin | >gi 20336248 ref NP_004707.2  proprotein con    |
| 94  | 104 | PHRSRKAKKEE | Furin | >gi 20336248 ref NP_004707.2  proprotein con    |
| 55  | 79  | RSRKAKEEGT  | Furin | >gi 20336248 ref NP_004707.2  proprotein con    |
| 107 | 136 | CQRCRRSVSS  | Furin | >gi 23397566 ref NP_694998.1  transmembran      |
| 60  | 84  | ALRRRRHTFK  | Furin | >gi 42560237 ref NP_002846.3  poliovirus rece   |
| 43  | 73  | LNRTGRSIVY  | Furin | >gi 4504009 ref NP_000160.1  alpha-galactosidi  |
| 47  | 68  | HHRHRRGQET  | Furin | >gi 4885261 ref NP_005251.1  growth different   |
| 72  | 100 | AHRQPRLVGA  | Furin | >gi 50659091 ref NP_777601.2  scavenger rece    |
| 49  | 64  | PQRFDRIAHT  | Furin | >gi 13929462 ref NP_001488.2  UDP-Gal:betaG     |
| 84  | 89  | LVRKRRANSL  | Furin | >gi 192447438 ref NP_000304.2  protein S alph   |
| 62  | 66  | KKRKGRVID   | Furin | >gi 195976782 ref NP_055953.3  Paf1/RNA poly    |
| 60  | 57  | ERRSKRDEKL  | Furin | >gi 195976782 ref NP_055953.3  Paf1/RNA poly    |
| 63  | 84  | AEREKRKNRT  | Furin | >gi 195976782 ref NP_055953.3  Paf1/RNA poly    |
| 43  | 42  | LNRRSRKVG   | Furin | >gi 42476320 ref NP_071931.2  sushi domain c    |
| 402 | 537 | YDRQKRRAKP  | Furin | >gi 167857788 ref NP_005922.2  MHC class I pc   |
| 55  | 80  | RCRFLRSVMS  | Furin | >gi 27436981 ref NP_004970.3  potassium volta   |
| 59  | 59  | PRRAKRRAIR  | Furin | >gi 27436981 ref NP_004970.3  potassium volta   |
| 26  | 56  | QQRQYRSAYY  | Furin | >gi 4758462 ref NP_004475.1  glypican 3 [Hom    |
| 16  | 16  | VNRLKREIEK  | Furin | >gi 109148531 ref NP_620775.2  coiled-coil dor  |
| 37  | 49  | ALRLRRSLSP  | Furin | >gi 11128029 ref NP_061749.1  protocadherin     |
| 49  | 36  | PPRYPRDVRD  | Furin | >gi 11321561 ref NP_000604.1  hemopexin pre     |
| 23  | 34  | GGRWRRSAPG  | Furin | >gi 17149834 ref NP_002950.3  sortilin 1 prepr  |

|     |     |            |       |                                  |                    |
|-----|-----|------------|-------|----------------------------------|--------------------|
| 37  | 43  | GGRIFRSSDF | Furin | >gi 17149834 ref NP_002950.3     | sortilin 1 prepr   |
| 68  | 68  | LSRTGRSREV | Furin | >gi 22749479 ref NP_689968.1     | canopy 4 homo      |
| 94  | 92  | QARLGRIVDR | Furin | >gi 28626510 ref NP_065701.2     | reticulocalbin 3   |
| 12  | 22  | KARIKRMVFK | Furin | >gi 38348304 ref NP_940898.1     | von Willebrand     |
| 56  | 92  | LARDRRQATE | Furin | >gi 4506879 ref NP_002997.1      | selectin P ligand  |
| 104 | 126 | SSRHRRALDT | Furin | >gi 63025222 ref NP_000651.3     | transforming gr    |
| 71  | 76  | PCRSIRDILA | Furin | >gi 67782356 ref NP_001255.3     | corneodesmosi      |
| 61  | 76  | YIRSERSVIL | Furin | >gi 111118994 ref NP_001693.2    | brain-specific     |
| 250 | 257 | EQRERRRAAK | Furin | >gi 145312241 ref NP_071330.3    | differentially e   |
| 30  | 41  | IERSPRSAST | Furin | >gi 153285408 ref NP_000244.2    | microsomal tr      |
| 33  | 60  | TARYHRDAGA | Furin | >gi 219521907 ref NP_001137157.1 | carboxyles         |
| 76  | 104 | KQETKRSINE | Furin | >gi 27777632 ref NP_003038.2     | solute carrier fa  |
| 87  | 93  | TNRKTRFIIH | Furin | >gi 10835000 ref NP_000927.1     | pancreatic lipas   |
| 32  | 42  | RRLQKRSSRH | Furin | >gi 126090883 ref NP_001126.2    | aggrecan isofo     |
| 47  | 65  | SSRHPRRSRP | Furin | >gi 126090883 ref NP_001126.2    | aggrecan isofo     |
| 64  | 73  | PRRSRRSAFH | Furin | >gi 20336242 ref NP_000430.3     | proprotein con     |
| 87  | 93  | KERSKRSALR | Furin | >gi 20336242 ref NP_000430.3     | proprotein con     |
| 77  | 101 | DPRTWRSVPE | Furin | >gi 20336242 ref NP_000430.3     | proprotein con     |
| 36  | 55  | HLRRFRSVPR | Furin | >gi 221316614 ref NP_004416.2    | extracellular n    |
| 81  | 115 | KQRPPRSTCQ | Furin | >gi 27262661 ref NP_000748.3     | colony stimulat    |
| 32  | 46  | STRDRRSPAE | Furin | >gi 27262661 ref NP_000748.3     | colony stimulat    |
| 38  | 43  | TPRPRRSLAL | Furin | >gi 30425368 ref NP_848544.1     | parathyroid hor    |
| 85  | 85  | DDRLCRSVSG | Furin | >gi 38348370 ref NP_940943.1     | IGF-like family r  |
| 32  | 47  | FSRVPRKVQP | Furin | >gi 4502015 ref NP_003479.1      | A-kinase anchor    |
| 302 | 371 | GARLRRSLKP | Furin | >gi 4503347 ref NP_001365.1      | deoxyribonuclea    |
| 15  | 32  | RKYPKRSSEV | Furin | >gi 13270473 ref NP_077722.1     | beta-neoendor      |
| 59  | 71  | VRRWRRVAVG | Furin | >gi 31542509 ref NP_112574.3     | ADP-dependent      |
| 124 | 134 | ERRKRRSVNP | Furin | >gi 4506917 ref NP_003011.1      | secretogranin V i  |
| 59  | 95  | VFRQKRSDLY | Furin | >gi 9910460 ref NP_064587.1      | nitrilase family r |
| 57  | 51  | KSRKSRPNAS | Furin | >gi 189027129 ref NP_808881.3    | phosphodiester     |
| 66  | 79  | LLRSRRNVVM | Furin | >gi 16306555 ref NP_071337.2     | potassium chan     |
| 162 | 175 | PIRSRRALPP | Furin | >gi 189027135 ref NP_004807.3    | chromosome 1       |
| 69  | 74  | AERRPRRVEA | Furin | >gi 189027135 ref NP_004807.3    | chromosome 1       |
| 97  | 102 | RQRLHRFDSQ | Furin | >gi 33300639 ref NP_115652.2     | rhomboid domi      |
| 19  | 17  | NGRKKRSAQN | Furin | >gi 40806187 ref NP_955387.1     | ADAM metallo       |
| 75  | 83  | SGRPRRSAGK | Furin | >gi 40806187 ref NP_955387.1     | ADAM metallo       |
| 145 | 184 | AQRRRRAVGL | Furin | >gi 4885333 ref NP_005297.1      | free fatty acid re |
| 91  | 92  | ASRLARGEDE | Furin | >gi 50428935 ref NP_060644.4     | BPY2 interactin    |
| 45  | 53  | GPRARRSASP | Furin | >gi 50428935 ref NP_060644.4     | BPY2 interactin    |
| 42  | 61  | RFRKRRHHK  | Furin | >gi 119372310 ref NP_000162.2    | glycine recept     |
| 85  | 101 | FRRKRRHHKE | Furin | >gi 119372310 ref NP_000162.2    | glycine recept     |

|     |     |            |       |                                                 |
|-----|-----|------------|-------|-------------------------------------------------|
| 97  | 114 | HSRKKRQLYS | Furin | >gi 20143933 ref NP_604390.1  relaxin 2 isoform |
| 61  | 83  | SPRVKRIFYQ | Furin | >gi 29171682 ref NP_002177.2  interleukin 9 re  |
| 51  | 57  | PARPWKSVAL | Furin | >gi 29171682 ref NP_002177.2  interleukin 9 re  |
| 67  | 76  | RFRFGRQDEG | Furin | >gi 38016140 ref NP_937823.1  RF(Arg-Phe)ami    |
| 38  | 38  | RLRIRRMADA | Furin | >gi 4505167 ref NP_002401.1  N-acetylglucosar   |
| 136 | 143 | TERKRRHAKP | Furin | >gi 110611167 ref NP_631894.2  ADAM metallo     |
| 120 | 155 | GCRRRRDHMH | Furin | >gi 110611167 ref NP_631894.2  ADAM metallo     |
| 69  | 90  | VMRRRRCVGL | Furin | >gi 11641243 ref NP_071736.1  peptide deform    |
| 21  | 30  | SPRTKRTPGP | Furin | >gi 148728188 ref NP_002199.3  integrin alpha   |
| 162 | 171 | TARQRRALEK | Furin | >gi 148728188 ref NP_002199.3  integrin alpha   |
| 140 | 177 | RSRRGRFLNQ | Furin | >gi 148728188 ref NP_002199.3  integrin alpha   |
| 65  | 102 | TQRNRRSLSG | Furin | >gi 188536067 ref NP_065094.3  carboxypeptid    |
| 90  | 104 | RSRLKRAVWI | Furin | >gi 188536067 ref NP_065094.3  carboxypeptid    |
| 79  | 102 | RSRNSRFRCR | Furin | >gi 188536067 ref NP_065094.3  carboxypeptid    |
| 87  | 101 | WKRYQRSHDD | Furin | >gi 189571657 ref NP_110419.5  glycerophosph    |
| 161 | 218 | YNRRRRSLRR | Furin | >gi 27436938 ref NP_005036.2  reelin isoform a  |
| 32  | 31  | SSSRKRSFFR | Furin | >gi 45580688 ref NP_000578.2  complement co     |
| 66  | 85  | FARLRRVKTA | Furin | >gi 4885335 ref NP_005273.1  G protein-couple   |
| 16  | 22  | VWRRKRKEKQ | Furin | >gi 7706529 ref NP_057466.1  CD244 natural ki   |
| 46  | 44  | RHFRKRSHSK | Furin | >gi 118722349 ref NP_976324.2  RNA binding n    |
| 29  | 33  | SPRTRSRSP  | Furin | >gi 118722349 ref NP_976324.2  RNA binding n    |
| 230 | 254 | AYRSRRTWEL | Furin | >gi 183227691 ref NP_057419.3  proline dehyd    |
| 33  | 40  | QLRLKRDPGI | Furin | >gi 5901910 ref NP_008984.1  CD160 antigen [t   |
| 59  | 72  | AGRVKRGWVW | Furin | >gi 16753221 ref NP_067071.1  cadherin 22 pre   |
| 46  | 49  | RRRAARGTSP | Furin | >gi 23308587 ref NP_694551.1  N-acetylglutam    |
| 103 | 146 | SQRRKRRAPL | Furin | >gi 4503969 ref NP_000548.1  growth different   |
| 40  | 47  | QRRKRRAPLA | Furin | >gi 4503969 ref NP_000548.1  growth different   |
| 170 | 248 | LARRKRSAGA | Furin | >gi 7705308 ref NP_057288.1  growth different   |
| 28  | 18  | KSRLKKSQFL | Furin | >gi 105990535 ref NP_000121.2  coagulation fa   |
| 121 | 149 | RCRHKRWIFI | Furin | >gi 146094506 ref NP_001078868.1  receptor e    |
| 105 | 118 | KSRESRPRRQ | Furin | >gi 146094506 ref NP_001078868.1  receptor e    |
| 55  | 55  | ESRPRRQGEV | Furin | >gi 146094506 ref NP_001078868.1  receptor e    |
| 24  | 17  | YGRVKRGSKV | Furin | >gi 15147343 ref NP_066276.2  fibroblast grow   |
| 65  | 86  | YFRIRRGTD  | Furin | >gi 189083844 ref NP_001805.3  cathepsin C iso  |
| 39  | 52  | LRRRRRQEEK | Furin | >gi 191252816 ref NP_001122108.1  extracellul   |
| 33  | 56  | GSKQRRIVGI | Furin | >gi 11415038 ref NP_068812.1  solute carrier fa |
| 221 | 295 | ARRSRAQPP  | Furin | >gi 18379346 ref NP_055793.1  VPS10 domain i    |
| 23  | 18  | GGRFDRQASA | Furin | >gi 48717495 ref NP_061888.1  chondroitin sulf  |
| 76  | 78  | KRRATRFWDP | Furin | >gi 51702236 ref NP_001003799.1  TCR gamma      |
| 34  | 32  | RMFERRSFET | Furin | >gi 7305525 ref NP_038465.1  low density lipop  |
| 27  | 53  | ASRFPRAYS  | Furin | >gi 112789566 ref NP_689418.2  taste receptor   |

|     |                |       |                                                 |
|-----|----------------|-------|-------------------------------------------------|
| 27  | 33 PSRRSRSPRT  | Furin | >gi 124486584 ref NP_001074466.1  retbindin i   |
| 65  | 68 GFRHARNVDR  | Furin | >gi 14149904 ref NP_115584.1  anthrax toxin re  |
| 71  | 100 WPRHRRVNGT | Furin | >gi 28559088 ref NP_000417.2  laminin alpha 2   |
| 26  | 41 PPRRKRRTG   | Furin | >gi 28559088 ref NP_000417.2  laminin alpha 2   |
| 54  | 74 PRRKRRTGQ   | Furin | >gi 28559088 ref NP_000417.2  laminin alpha 2   |
| 67  | 75 EIRLKRALDF  | Furin | >gi 7661662 ref NP_056484.1  protocadherin b    |
| 34  | 38 RFRPRRFFPG  | Furin | >gi 195963431 ref NP_001124396.1  transm        |
| 42  | 61 PQKAKRSVPP  | Furin | >gi 33598937 ref NP_878315.1  scavenger rece    |
| 83  | 108 KDNFKRSVAS | Furin | >gi 4504125 ref NP_000824.1  N-methyl-D-aspa    |
| 39  | 42 LSRPSRSISL  | Furin | >gi 4504125 ref NP_000824.1  N-methyl-D-aspa    |
| 77  | 70 FERKAREVCD  | Furin | >gi 4557427 ref NP_001240.1  ectonucleoside t   |
| 51  | 66 ATRRKRHSEH  | Furin | >gi 166197702 ref NP_001239.2  ectonucleosid    |
| 62  | 69 RARKNRSRIP  | Furin | >gi 194595492 ref NP_001092905.2  speedy ho     |
| 55  | 82 LHRNKRTCSE  | Furin | >gi 21264361 ref NP_631947.1  mannan-bindin     |
| 55  | 44 CGRYKRWRKH  | Furin | >gi 40217833 ref NP_061123.3  G protein-coup    |
| 150 | 161 DPRVRRAAQA | Furin | >gi 4826740 ref NP_004953.1  growth different   |
| 45  | 38 PGRKDRRKKG  | Furin | >gi 4826740 ref NP_004953.1  growth different   |
| 96  | 118 EFRAHRSVLA | Furin | >gi 8922528 ref NP_060613.1  kelch-like 11 [Ho  |
| 17  | 22 RSRGKRFSQS  | Furin | >gi 10337603 ref NP_066277.1  left-right deterr |
| 65  | 62 PKQEKRSVFQ  | Furin | >gi 115583685 ref NP_003042.3  solute carrier t |
| 54  | 49 WSRYGRFLQP  | Furin | >gi 153946391 ref NP_000827.2  N-methyl-D-as    |
| 67  | 79 GSRWKRPIDL  | Furin | >gi 153946391 ref NP_000827.2  N-methyl-D-as    |
| 71  | 70 VDRWRRTKGA  | Furin | >gi 153946391 ref NP_000827.2  N-methyl-D-as    |
| 27  | 31 PARWPRSDPE  | Furin | >gi 153946391 ref NP_000827.2  N-methyl-D-as    |
| 119 | 165 HHRHRAAGG  | Furin | >gi 153946391 ref NP_000827.2  N-methyl-D-as    |
| 70  | 81 ASRRYRGNDS  | Furin | >gi 170784865 ref NP_075051.4  CAS1 domain      |
| 111 | 145 PSGQKRSRSR | Furin | >gi 23510462 ref NP_690051.1  RNA binding m     |
| 105 | 92 TRRRPRHAEQ  | Furin | >gi 38045890 ref NP_937757.1  CUB and Sushi r   |
| 63  | 70 EHRVCRSDNT  | Furin | >gi 38045890 ref NP_937757.1  CUB and Sushi r   |
| 44  | 66 PERHTRSVDY  | Furin | >gi 4503705 ref NP_002000.1  fibroblast growth  |
| 67  | 59 DIRVRRLFCR  | Furin | >gi 4503705 ref NP_002000.1  fibroblast growth  |
| 55  | 61 LVRPRRSAPK  | Furin | >gi 4507597 ref NP_003800.1  tumor necrosis fi  |
| 223 | 276 KTRARRAIAA | Furin | >gi 4507597 ref NP_003800.1  tumor necrosis fi  |
| 17  | 10 KRRQKREWVK  | Furin | >gi 119964718 ref NP_001935.2  desmoglein 3     |
| 171 | 259 LKRSKRRWAP | Furin | >gi 13435361 ref NP_077739.1  desmocollin 1 is  |
| 44  | 49 RHRQTRSSTE  | Furin | >gi 14589869 ref NP_116743.1  Burkitt lymphor   |
| 148 | 186 AYRHRRLLSI | Furin | >gi 14589869 ref NP_116743.1  Burkitt lymphor   |
| 60  | 73 VIRHKRQSGV  | Furin | >gi 153946395 ref NP_002151.2  tenascin C pre   |
| 132 | 165 EGRRKRAGQA | Furin | >gi 153946395 ref NP_002151.2  tenascin C pre   |
| 83  | 103 DRRIARFVLP | Furin | >gi 194239697 ref NP_006662.3  solute carrier t |
| 47  | 50 WRRMKRSRCP  | Furin | >gi 27437042 ref NP_724780.2  colony stimulat   |

|     |                |         |                                  |                                  |                    |
|-----|----------------|---------|----------------------------------|----------------------------------|--------------------|
| 54  | 53 FRRRPRQKEA  | Furin   | >gi 42716277 ref NP_055622.3     | transmembran                     |                    |
| 44  | 49 GQRKKRALDT  | Furin   | >gi 4507465 ref NP_003230.1      | transforming gro                 |                    |
| 56  | 83 HQRPKRYFTI  | Furin   | >gi 67191027 ref NP_000876.3     | integrin alpha 4                 |                    |
| 63  | 58 GSRKARFGSE  | Furin   | >gi 15529998 ref NP_003039.2     | solute carrier fa                |                    |
| 189 | 223 WGRTRRLLWA | Furin   | >gi 5032005 ref NP_005599.1      | protein tyrosine                 |                    |
| 11  | 14 FKRRRRSSSV  | Furin   | >gi 70608155 ref NP_000912.3     | phosphodiester                   |                    |
| 114 | 151 PKRLRRSLPP | Furin   | >gi 70608155 ref NP_000912.3     | phosphodiester                   |                    |
| 24  | 39 PVRRDRSTSI  | Furin   | >gi 70608155 ref NP_000912.3     | phosphodiester                   |                    |
| 88  | 87 AYRPGRRVCA  | Furin   | >gi 7705889 ref NP_057299.1      | EGF-like-domain                  |                    |
| 60  | 44 PRRHRP      | PRRV    | Furin                            | >gi 8924258 ref NP_061028.1      | gamma-aminobu      |
| 54  | 67 RHRP        | PRRVIA  | Furin                            | >gi 8924258 ref NP_061028.1      | gamma-aminobu      |
| 73  | 72 HRRP        | RRVIAR  | Furin                            | >gi 8924258 ref NP_061028.1      | gamma-aminobu      |
| 96  | 109 RARLSRPDSG | Furin   | >gi 22209004 ref NP_071418.2     | popeye protein                   |                    |
| 46  | 50 RARHRKNVDR  | Furin   | >gi 31377806 ref NP_002635.2     | polymeric immu                   |                    |
| 93  | 112 TDRRRRDLGG | Furin   | >gi 37694062 ref NP_932766.1     | aquaporin 1 [Hc                  |                    |
| 39  | 36 PARDKRKLG   | A       | Furin                            | >gi 126116598 ref NP_001001712.2 | lipocalin 1        |
| 52  | 51 ELRGKRSCHA  | Furin   | >gi 134244281 ref NP_005920.2    | melanoma-ass                     |                    |
| 72  | 71 ASHPKRAVRE  | Furin   | >gi 157426856 ref NP_001098717.1 | armadillo i                      |                    |
| 14  | 27 SFRSLRSWLI  | Furin   | >gi 157426856 ref NP_001098717.1 | armadillo i                      |                    |
| 19  | 30 FDRKKKSISL  | Furin   | >gi 194328732 ref NP_006739.2    | Src-like-adapt                   |                    |
| 64  | 71 NKRKKRQVPY  | Furin   | >gi 209969808 ref NP_001129662.1 | lymphocyt                        |                    |
| 153 | 166 LSR        | TARAWGK | Furin                            | >gi 22748923 ref NP_689649.1     | GLI pathogenes     |
| 26  | 40 PQRHRRTPDR  | Furin   | >gi 4557255 ref NP_001105.1      | adenylate cyclas                 |                    |
| 148 | 169 PQR        | RRRQLDP | Furin                            | >gi 6006011 ref NP_005492.1      | integrin alpha 3 i |
| 52  | 72 RRRGRKSPSK  | Furin   | >gi 120587029 ref NP_766638.2    | signal peptide                   |                    |
| 34  | 72 ARRTMRSSAG  | Furin   | >gi 16163666 ref NP_201573.1     | melanoma-assc                    |                    |
| 43  | 53 PHRTKREAGA  | Furin   | >gi 18860902 ref NP_002835.2     | protein tyrosine                 |                    |
| 49  | 56 LSRPLRGVSG  | Furin   | >gi 223278413 ref NP_694999.3    | MAM domain                       |                    |
| 77  | 138 CLRQRRGFHH | Furin   | >gi 4503893 ref NP_001469.1      | beta-1 4-N-acety                 |                    |
| 6   | 16 DSRPRRSSTQ  | Furin   | >gi 68348711 ref NP_001234.2     | tumor necrosis                   |                    |
| 73  | 85 GHRP        | RRPRGA  | Furin                            | >gi 11072101 ref NP_036397.1     | rhomboid dom       |
| 43  | 52 MRRKKRFAKQ  | Furin   | >gi 13236530 ref NP_077278.1     | matrix metallo                   |                    |
| 25  | 31 SGRENRS     | LFT     | Furin                            | >gi 162809334 ref NP_002855.2    | pregnancy-zor      |
| 15  | 17 HMRMTR      | SVDN    | Furin                            | >gi 170932469 ref NP_061333.2    | recombinator       |
| 42  | 50 WRRRRRSISR  | Furin   | >gi 195539372 ref NP_008969.2    | ADAM metallic                    |                    |
| 42  | 44 TERTKRELEN  | Furin   | >gi 32698704 ref NP_056210.1     | tectonin beta-p                  |                    |
| 22  | 21 ATRAPRSSSQ  | Furin   | >gi 32698704 ref NP_056210.1     | tectonin beta-p                  |                    |
| 41  | 41 PNREDRAVRD  | Furin   | >gi 60498978 ref NP_114437.2     | elastin microfib                 |                    |
| 21  | 34 EARKNR      | PAGA    | Furin                            | >gi 71164892 ref NP_071914.3     | gremlin 2 precu    |
| 143 | 175 SRRT       | RLLDK   | Furin                            | >gi 8393843 ref NP_058627.1      | NADPH oxidase 4    |
| 158 | 195 RSRMRRALVF | Furin   | >gi 94818790 ref NP_001035546.1  | rhomboid d                       |                    |

|     |                      |                                                 |
|-----|----------------------|-------------------------------------------------|
| 33  | 61 LLRVFRQVEK Furin  | >gi 193211608 ref NP_071752.3  dipeptidase 3    |
| 42  | 42 SRTIKRSVIS Furin  | >gi 20336246 ref NP_006191.2  proprotein con    |
| 59  | 65 KKRTKRDYDF Furin  | >gi 20336246 ref NP_006191.2  proprotein con    |
| 14  | 34 LSRKKREKKK Furin  | >gi 21361912 ref NP_071760.2  DnaJ (Hsp40) ho   |
| 41  | 63 KSKAKRQKDF Furin  | >gi 21361912 ref NP_071760.2  DnaJ (Hsp40) ho   |
| 83  | 116 SRRRKREVQM Furin | >gi 24497531 ref NP_714928.1  Ellis van Crevelk |
| 64  | 93 SNRFRRQQWK Furin  | >gi 24497531 ref NP_714928.1  Ellis van Crevelk |
| 66  | 55 PRRSKRIAGK Furin  | >gi 40788018 ref NP_955389.1  Rho GTPase act    |
| 37  | 66 RSRQKKTGQ Furin   | >gi 4505187 ref NP_002407.1  small inducible c  |
| 48  | 55 KHRSNRQLGI Furin  | >gi 4557543 ref NP_001384.1  extracellular mat  |
| 102 | 128 IDRFKRWKAE Furin | >gi 109633028 ref NP_001035918.1  serine/thr    |
| 38  | 54 PARSHRSCRT Furin  | >gi 145309328 ref NP_775733.3  papilin [Homo    |
| 24  | 20 GGRGPREVSP Furin  | >gi 154090976 ref NP_055892.2  sterile alpha a  |
| 29  | 39 QGRSSRDSSA Furin  | >gi 154090976 ref NP_055892.2  sterile alpha a  |
| 58  | 62 RRRRKRLRQD Furin  | >gi 205277423 ref NP_065840.2  immunoglobu      |
| 30  | 32 AQRLARSFDC Furin  | >gi 205277423 ref NP_065840.2  immunoglobu      |
| 48  | 72 AFRRRRDATA Furin  | >gi 205277423 ref NP_065840.2  immunoglobu      |
| 96  | 120 FSRCKRGTGV Furin | >gi 31542313 ref NP_525126.2  C-type lectin dc  |
| 126 | 157 LLRRRAVLP Furin  | >gi 4501915 ref NP_003807.1  ADAM metallope     |
| 71  | 83 YFRKKRSQTY Furin  | >gi 4501915 ref NP_003807.1  ADAM metallope     |
| 34  | 42 SHRSKRSLSC Furin  | >gi 89191868 ref NP_000543.2  von Willebrand    |
| 116 | 132 IIRQKRLSHV Furin | >gi 8923421 ref NP_060297.1  seryl-tRNA synth   |
| 54  | 57 QIRQDRSKGT Furin  | >gi 115527062 ref NP_001840.3  alpha 2 type V   |
| 101 | 107 FHKARRFVEQ Furin | >gi 115527062 ref NP_001840.3  alpha 2 type V   |
| 71  | 103 EIRVNRSVHE Furin | >gi 29029632 ref NP_004295.2  anaplastic lymph  |
| 69  | 67 LFRSNRDVHV Furin  | >gi 41327708 ref NP_957705.1  crumbs homolc     |
| 130 | 201 RSRRIPTHV Furin  | >gi 4503695 ref NP_003853.1  fibroblast growth  |
| 41  | 48 FLRKRRETSQ Furin  | >gi 7661996 ref NP_055688.1  lysophosphatidy    |
| 168 | 197 ARLLRREPGG Furin | >gi 110735402 ref NP_005695.3  protein tyrosir  |
| 104 | 110 NRRRRRERRD Furin | >gi 171460997 ref NP_006557.2  CD226 molecu     |
| 85  | 95 RRRERRDLFT Furin  | >gi 171460997 ref NP_006557.2  CD226 molecu     |
| 50  | 36 INRPRRILNT Furin  | >gi 224451131 ref NP_001136273.1  eyes shut l   |
| 103 | 108 IPRVRAVLP Furin  | >gi 4502067 ref NP_001624.1  alpha-1-microglc   |
| 219 | 293 PSRKRAAIP Furin  | >gi 10190670 ref NP_065685.1  growth differen   |
| 31  | 41 SSRIKRSAPL Furin  | >gi 148886654 ref NP_699197.3  polydom [Hon     |
| 105 | 149 CSRKRRTGFG Furin | >gi 148886654 ref NP_699197.3  polydom [Hon     |
| 26  | 32 ARTKRHRST Furin   | >gi 149773484 ref NP_065913.1  leucine rich re  |
| 151 | 186 QSRGRREARR Furin | >gi 24041040 ref NP_694882.1  ADAM metallope    |
| 105 | 111 HGRRRRHRSY Furin | >gi 28557777 ref NP_787120.1  immunoglobuli     |
| 45  | 50 RRRRHRSYSP Furin  | >gi 28557777 ref NP_787120.1  immunoglobuli     |
| 10  | 17 ALRRARSAPA Furin  | >gi 70995319 ref NP_002497.2  nerve growth fa   |

|     |     |            |       |                                  |                   |
|-----|-----|------------|-------|----------------------------------|-------------------|
| 13  | 10  | THRSKRSSSH | Furin | >gi 70995319 ref NP_002497.2     | nerve growth fa   |
| 138 | 185 | SRRARRDHFS | Furin | >gi 8922976 ref NP_060850.1      | DEAD (Asp-Glu-A   |
| 195 | 269 | AARRRRSLPG | Furin | >gi 8922976 ref NP_060850.1      | DEAD (Asp-Glu-A   |
| 82  | 90  | LYREKKSASW | Furin | >gi 125988398 ref NP_001074447.1 | leukocyte         |
| 3   | 2   | RKRAPRSKVP | Furin | >gi 14550407 ref NP_000054.2     | complement co     |
| 35  | 47  | PNRPDRPVLK | Furin | >gi 73747915 ref NP_000535.3     | transporter 2 A   |
| 67  | 83  | PHRARRGPSP | Furin | >gi 8923894 ref NP_061146.1      | thrombospondin    |
| 26  | 18  | PQRTQRSTEI | Furin | >gi 105990541 ref NP_000341.2    | ATP-binding ca    |
| 59  | 52  | ILRQRRCLPQ | Furin | >gi 116256487 ref NP_006693.3    | patatin-like ph   |
| 51  | 89  | MIRVRKSKGK | Furin | >gi 167001419 ref NP_000818.2    | glutamate rec     |
| 91  | 119 | RGRERRWDRG | Furin | >gi 27734809 ref NP_775935.1     | ADP-ribosylatio   |
| 75  | 80  | PGRVRRRGSP | Furin | >gi 56237021 ref NP_115823.3     | fibrillin 3 precu |
| 39  | 48  | RDRPRRSAHR | Furin | >gi 56237021 ref NP_115823.3     | fibrillin 3 precu |
| 69  | 82  | RARLPRDCTR | Furin | >gi 66346700 ref NP_057340.2     | N-acetylglucosa   |
| 82  | 81  | MWRCPRQVST | Furin | >gi 66346700 ref NP_057340.2     | N-acetylglucosa   |
| 46  | 61  | FWRKKRDAK  | Furin | >gi 148728162 ref NP_002834.3    | protein tyrosir   |
| 44  | 52  | VGRVLRSDGK | Furin | >gi 22749297 ref NP_689848.1     | oncoprotein-inc   |
| 197 | 232 | HRRMRRGAGG | Furin | >gi 22749297 ref NP_689848.1     | oncoprotein-inc   |
| 40  | 57  | SVRRKRQVYG | Furin | >gi 23503297 ref NP_699193.1     | protease serine   |
| 58  | 82  | SKRSRREASG | Furin | >gi 23503297 ref NP_699193.1     | protease serine   |
| 55  | 67  | GRRRKKSGRG | Furin | >gi 23503297 ref NP_699193.1     | protease serine   |
| 45  | 59  | AERAARFAKT | Furin | >gi 24307965 ref NP_055422.1     | UBX domain co     |
| 64  | 67  | RKRQCRSSQG | Furin | >gi 11321593 ref NP_002169.1     | insulin-like grov |
| 307 | 359 | DARRARSWAE | Furin | >gi 119703755 ref NP_002283.3    | laminin beta 2    |
| 113 | 130 | ASRAKRRGGG | Furin | >gi 24430141 ref NP_000129.2     | fibrillin 1 precu |
| 107 | 108 | RGRKRRSTNE | Furin | >gi 24430141 ref NP_000129.2     | fibrillin 1 precu |
| 38  | 56  | GQRKRRNTIH | Furin | >gi 33859835 ref NP_000592.3     | hepatocyte gro    |
| 42  | 52  | QRRVKRSVVV | Furin | >gi 76443679 ref NP_060043.2     | proprotein con    |
| 42  | 73  | REAFRRGVTK | Furin | >gi 76443679 ref NP_060043.2     | proprotein con    |
| 213 | 233 | GRRKARMLYQ | Furin | >gi 7706693 ref NP_056968.1      | membrane-boun     |
| 66  | 96  | KQRERRYSTV | Furin | >gi 10190698 ref NP_065711.1     | gap junction pr   |
| 21  | 21  | PPRERRGPAT | Furin | >gi 153792110 ref NP_065784.1    | HEG homolog       |
| 89  | 116 | LGRKARALGT | Furin | >gi 22202629 ref NP_665811.1     | programmed ce     |
| 57  | 50  | DERSKRIWLD | Furin | >gi 224458286 ref NP_653213.5    | lipoygenase t     |
| 30  | 36  | TLRTKRNAKI | Furin | >gi 33695113 ref NP_005758.2     | G-protein coup    |
| 36  | 48  | SSRSKKPKGL | Furin | >gi 41872448 ref NP_001964.2     | ELK4 protein isc  |
| 52  | 62  | SSREERSWFR | Furin | >gi 4757720 ref NP_004293.1      | activin A recepto |
| 22  | 28  | SSRPYRCKIK | Furin | >gi 4758786 ref NP_004541.1      | NADH dehydroge    |
| 21  | 12  | PHRAQRSPQQ | Furin | >gi 111118970 ref NP_542411.2    | collagen type     |
| 48  | 57  | PKKTRRSVDG | Furin | >gi 111118970 ref NP_542411.2    | collagen type     |
| 38  | 25  | GPRPRRDSAG | Furin | >gi 114796626 ref NP_037488.2    | solute carrier t  |



|     |                      |                                                 |
|-----|----------------------|-------------------------------------------------|
| 28  | 50 RPRRRRDLGS Furin  | >gi 13027602 ref NP_076424.1  DDRGK domain      |
| 28  | 32 DDRSKRDGSE Furin  | >gi 142976733 ref NP_058648.4  surface glycop   |
| 101 | 126 PQRKRRGYSE Furin | >gi 38569396 ref NP_009110.2  insulin-like 6 pr |
| 38  | 40 GDREKRDSVC Furin  | >gi 4507575 ref NP_001056.1  tumor necrosis fi  |
| 22  | 24 LRRQKRDWVI Furin  | >gi 4757960 ref NP_004351.1  cadherin 1 type    |
| 45  | 49 GNRFKKLADM Furin  | >gi 4757960 ref NP_004351.1  cadherin 1 type    |
| 25  | 21 SIRKKRFVSS Furin  | >gi 50845384 ref NP_008919.3  ADAM metallo      |
| 64  | 99 LGRLYRSLGE Furin  | >gi 83415184 ref NP_787057.2  transmembran      |
| 15  | 23 CLRKRRMQEE Furin  | >gi 116268101 ref NP_443138.2  leucine rich re  |
| 59  | 61 LTRSKRDSTY Furin  | >gi 116268101 ref NP_443138.2  leucine rich re  |
| 31  | 37 LQRQGRGSDP Furin  | >gi 12408654 ref NP_036332.2  beta-1 3-glucur   |
| 94  | 83 NSRLARNVKE Furin  | >gi 145580621 ref NP_861445.3  B and T lymph    |
| 46  | 71 KELRKRSVDQ Furin  | >gi 18079321 ref NP_542174.1  V-set and trans   |
| 140 | 184 HTRLRRSGRC Furin | >gi 205277383 ref NP_066278.3  macrophage s     |
| 37  | 54 VRRQKREWIK Furin  | >gi 29789445 ref NP_817123.1  desmoglein 4 is   |
| 27  | 29 RHRVTRYJNI Furin  | >gi 29789445 ref NP_817123.1  desmoglein 4 is   |
| 25  | 24 GKRKRRSKSR Furin  | >gi 46488917 ref NP_937829.2  astrotactin 2 isc |
| 45  | 37 RERMAREVAA Furin  | >gi 4758088 ref NP_004852.1  galactose-3-O-su   |
| 1   | 4 KIRKKRLENR Furin   | >gi 6912284 ref NP_036245.1  carbonic anhydr    |
| 39  | 46 LSRVRREDTP Furin  | >gi 19923975 ref NP_612454.1  G protein-coup    |
| 61  | 77 SMRVRRHSDP Furin  | >gi 25306235 ref NP_733927.1  brain-derived n   |
| 49  | 65 NFRDKRSALQ Furin  | >gi 32454741 ref NP_001226.2  serine (or cyste  |
| 31  | 29 LQRVRRANTF Furin  | >gi 4503635 ref NP_000497.1  coagulation fact   |
| 85  | 89 LGRPKRCPRS Furin  | >gi 55770862 ref NP_003226.4  thyroglobulin [t  |
| 45  | 52 SPRVARFATS Furin  | >gi 55770862 ref NP_003226.4  thyroglobulin [t  |
| 30  | 48 QRRLPRSVRS Furin  | >gi 66912176 ref NP_001019782.1  leucine rich   |
| 33  | 33 LPRSVRSTRD Furin  | >gi 66912176 ref NP_001019782.1  leucine rich   |
| 63  | 91 SVRSTRDVQA Furin  | >gi 66912176 ref NP_001019782.1  leucine rich   |
| 18  | 17 LGRHRRILQA Furin  | >gi 75677363 ref NP_068591.2  lectin mannose    |
| 64  | 82 SGRNRSTST Furin   | >gi 163792198 ref NP_056051.2  latrophilin 3 p  |
| 74  | 90 CSRSKRPLV Furin   | >gi 194097446 ref NP_776189.3  RELT-like 2 [H   |
| 8   | 9 GGRPPRPAQG Furin   | >gi 37537692 ref NP_002714.2  proline-rich pro  |
| 55  | 71 SSRPARFLRH Furin  | >gi 41152074 ref NP_955805.1  steroid-sensitiv  |
| 43  | 35 PARFLRHTGR Furin  | >gi 41152074 ref NP_955805.1  steroid-sensitiv  |
| 37  | 54 LSRKKRSGRH Furin  | >gi 4504711 ref NP_002186.1  insulin-like 4 pre |
| 65  | 55 LSRFGRFWKK Furin  | >gi 4885135 ref NP_005445.1  cerberus 1 [Hom    |
| 53  | 67 SIRSDRSVPS Furin  | >gi 9665262 ref NP_004096.2  EGF-containing f   |
| 49  | 95 KQRSRRNDEE Furin  | >gi 156071472 ref NP_001758.2  CD2 molecule     |
| 6   | 10 QRRNKREDRT Furin  | >gi 192449445 ref NP_003604.3  cartilage inter  |
| 75  | 72 SRRQQRASRG Furin  | >gi 192449445 ref NP_003604.3  cartilage inter  |
| 68  | 86 MPRERRDSGV Furin  | >gi 215820650 ref NP_001135975.1  StAR-relat    |

|     |     |            |       |                                                        |
|-----|-----|------------|-------|--------------------------------------------------------|
| 44  | 60  | RKRDRRGCF  | Furin | >gi 31377697 ref NP_078932.2  glycosyltransferase      |
| 72  | 104 | NHVVKRDVDE | Furin | >gi 110556638 ref NP_149018.2  leishmanolysin          |
| 26  | 30  | PERGPRGKGG | Furin | >gi 194353970 ref NP_000672.3  alpha-2A-adrenomedullin |
| 75  | 78  | QNREKRFTFV | Furin | >gi 194353970 ref NP_000672.3  alpha-2A-adrenomedullin |
| 18  | 20  | QCRFFRSACS | Furin | >gi 21327680 ref NP_001663.2  agouti signaling         |
| 114 | 168 | RSRRRRPRRE | Furin | >gi 30520348 ref NP_849158.1  phospholipase A2         |
| 30  | 30  | RRRPRREAPF | Furin | >gi 30520348 ref NP_849158.1  phospholipase A2         |
| 16  | 21  | DIREKREKIK | Furin | >gi 5729913 ref NP_006690.1  mannosidase alpha         |
| 149 | 199 | LTRARRDAGP | Furin | >gi 93140999 ref NP_001035257.1  lunatic fringe        |
| 37  | 38  | RGRAGRSGKE | Furin | >gi 116686136 ref NP_997302.2  C1q and tumor necrosis  |
| 57  | 79  | RRRSIRDAED | Furin | >gi 194239733 ref NP_004165.2  solute carrier family   |
| 17  | 17  | SARRKRKKKH | Furin | >gi 20357585 ref NP_004597.2  TBP-associated factor    |
| 16  | 16  | LRRLKRNQEK | Furin | >gi 20357585 ref NP_004597.2  TBP-associated factor    |
| 59  | 85  | SRRRVRCSGA | Furin | >gi 32261307 ref NP_443085.2  aarF domain containing   |
| 29  | 40  | LRRRKRDWVI | Furin | >gi 14589893 ref NP_001785.2  cadherin 4 type 1        |
| 39  | 38  | KRAQKRSVGS | Furin | >gi 169404009 ref NP_003135.2  signal sequence         |
| 184 | 211 | RSRSLREFEE | Furin | >gi 39930569 ref NP_937790.1  abhydrolase domain       |
| 54  | 60  | QERNKRFYQ  | Furin | >gi 5803023 ref NP_006807.1  lectin mannose-binding    |
| 55  | 59  | YNRGRRKDDY | Furin | >gi 7019381 ref NP_037363.1  fibronectin leucine       |
| 60  | 73  | WHRLRKGCGA | Furin | >gi 126723564 ref NP_055797.2  pecanex-like 1          |
| 63  | 79  | ASRNKRPTFL | Furin | >gi 17505191 ref NP_004616.2  wingless-type N          |
| 36  | 59  | PDRVKRNILA | Furin | >gi 4557522 ref NP_000783.2  deiodinase iodotyrosine   |
| 48  | 53  | CSREARGSSR | Furin | >gi 59889564 ref NP_075563.3  metallophosphatase       |
| 57  | 67  | SIRDARMSDA | Furin | >gi 7657570 ref NP_055200.1  sialic acid binding       |
| 33  | 52  | KRRDKRWVKY | Furin | >gi 155030230 ref NP_005766.3  sorbin and SH2 domain   |
| 43  | 54  | VNTTKRDAGK | Furin | >gi 157419150 ref NP_002836.3  protein tyrosine kinase |
| 42  | 65  | FAVEKRGVHE | Furin | >gi 157419150 ref NP_002836.3  protein tyrosine kinase |
| 46  | 91  | VGRAGRVDGS | Furin | >gi 23308499 ref NP_694579.1  zinc finger protein      |
| 52  | 49  | RPRQRRAFQV | Furin | >gi 4557617 ref NP_000811.1  growth arrest-specific    |
| 44  | 58  | PRRQRRGTGA | Furin | >gi 56121815 ref NP_112219.2  ADAM metalloproteinase   |
| 149 | 193 | QPGLKRSVSR | Furin | >gi 56121815 ref NP_112219.2  ADAM metalloproteinase   |
| 120 | 143 | RQRSVRCTSH | Furin | >gi 56121815 ref NP_112219.2  ADAM metalloproteinase   |
| 172 | 263 | AARRRRHPDE | Furin | >gi 8923946 ref NP_061137.1  neutral sphingomyelinase  |
| 18  | 13  | TSRSFRTASV | Furin | >gi 32967311 ref NP_004422.2  ephrin receptor          |
| 103 | 130 | KGRRRKDDYA | Furin | >gi 7019383 ref NP_037413.1  fibronectin leucine       |
| 43  | 49  | SNRSYRDSGI | Furin | >gi 7019383 ref NP_037413.1  fibronectin leucine       |
| 45  | 54  | GGRNRRVAEA | Furin | >gi 24307999 ref NP_055956.1  glycerol-3-phosphate     |
| 175 | 246 | HGRRRREYWQ | Furin | >gi 17865814 ref NP_004656.2  vanin 2 isoform          |
| 30  | 33  | RGREFRIIFD | Furin | >gi 28605145 ref NP_000822.2  glutamate receptor       |
| 36  | 68  | RYRRKRHISV | Furin | >gi 30425410 ref NP_848586.1  R3H domain containing    |
| 12  | 19  | LQRLKRIVFD | Furin | >gi 38505222 ref NP_061895.3  thioredoxin domain       |

|     |     |             |       |                                  |                    |
|-----|-----|-------------|-------|----------------------------------|--------------------|
| 115 | 108 | PRRQKRLFCR  | Furin | >gi 4758868 ref NP_004190.1      | prolyl 4-hydroxyl  |
| 88  | 85  | PLRPRRETCH  | Furin | >gi 73486666 ref NP_001842.3     | alpha 1 type IX    |
| 15  | 15  | FSRQKRSSEA  | Furin | >gi 124430557 ref NP_079279.3    | a disintegrin-li   |
| 48  | 56  | HSRKKRLISY  | Furin | >gi 124430557 ref NP_079279.3    | a disintegrin-li   |
| 52  | 64  | KGRKYREVFC  | Furin | >gi 124430557 ref NP_079279.3    | a disintegrin-li   |
| 17  | 14  | PARETRSFTK  | Furin | >gi 149193325 ref NP_689886.2    | mucin 20 isofo     |
| 13  | 21  | GARRQRGAEA  | Furin | >gi 31077092 ref NP_076924.1     | neurogenin 2 [t    |
| 53  | 86  | KVRAKRSSKM  | Furin | >gi 4557727 ref NP_000228.1      | lipoprotein lipase |
| 34  | 47  | PARKYRFHGQ  | Furin | >gi 148596996 ref NP_076945.2    | CUE domain c       |
| 54  | 74  | VARLKRSRLK  | Furin | >gi 33636766 ref NP_071409.2     | phospholysine      |
| 14  | 18  | RHRATRKIGI  | Furin | >gi 36951034 ref NP_543009.2     | G protein-coup     |
| 32  | 40  | LRRPFRQVLA  | Furin | >gi 36951034 ref NP_543009.2     | G protein-coup     |
| 61  | 59  | RSRSKRHRHT  | Furin | >gi 4885339 ref NP_005274.1      | XC chemokine re    |
| 54  | 86  | GSRKRRTATY  | Furin | >gi 54792094 ref NP_056068.1     | WSC domain cc      |
| 107 | 126 | HWSRRTICV   | Furin | >gi 54792094 ref NP_056068.1     | WSC domain cc      |
| 99  | 142 | RRRGRRSHDP  | Furin | >gi 54792094 ref NP_056068.1     | WSC domain cc      |
| 30  | 37  | DGRSYRGISS  | Furin | >gi 116292750 ref NP_005568.2    | lipoprotein Lp     |
| 38  | 50  | YARVSRFVTW  | Furin | >gi 116292750 ref NP_005568.2    | lipoprotein Lp     |
| 39  | 48  | PSRRPRFKDI  | Furin | >gi 134152725 ref NP_005003.2    | receptor tyros     |
| 40  | 66  | RNRLFRGLDS  | Furin | >gi 134304842 ref NP_055596.3    | Rb1-inducible      |
| 46  | 66  | GRRPRRGSTA  | Furin | >gi 14149764 ref NP_115491.1     | potassium chan     |
| 29  | 31  | RMREDRDVND  | Furin | >gi 157502212 ref NP_059119.2    | polypeptide N      |
| 90  | 108 | SSRDERSWFR  | Furin | >gi 161333833 ref NP_660302.2    | activin A recep    |
| 40  | 58  | PMRQQRDEET  | Furin | >gi 24308149 ref NP_060035.1     | family with seq    |
| 68  | 89  | NERSYRIVRT  | Furin | >gi 4758280 ref NP_004429.1      | ephrin receptor l  |
| 55  | 85  | PQRSRRCLRD  | Furin | >gi 67782338 ref NP_001019978.1  | amyloid pre        |
| 53  | 86  | RWRQRRAAKG  | Furin | >gi 13129092 ref NP_076997.1     | transmembran       |
| 41  | 43  | PGRDGRDGRK  | Furin | >gi 206597452 ref NP_001128642.1 | C1q and tu         |
| 144 | 194 | TARLARALSP  | Furin | >gi 24638433 ref NP_056146.1     | nicastatin precu   |
| 135 | 152 | CCRKKRREEK  | Furin | >gi 4503173 ref NP_001329.1      | coxsackie virus a  |
| 13  | 12  | IHRFWKSAPP  | Furin | >gi 52627205 ref NP_001005288.1  | olfactory re       |
| 75  | 109 | RGRRRRRTAI  | Furin | >gi 7019387 ref NP_037477.1      | G protein-couple   |
| 81  | 108 | GRRRRRTAIL  | Furin | >gi 7019387 ref NP_037477.1      | G protein-couple   |
| 49  | 73  | NHRIFRSIKQ  | Furin | >gi 7019387 ref NP_037477.1      | G protein-couple   |
| 112 | 101 | SGRKTRSARR  | Furin | >gi 71361682 ref NP_006176.2     | nuclear mitotic    |
| 41  | 64  | ESRACRGVTT  | Furin | >gi 8392830 ref NP_059132.1      | alpha 1 4-galact   |
| 61  | 55  | QSWVKRDTEFC | Furin | >gi 134268640 ref NP_005413.2    | tectorin alpha     |
| 76  | 104 | PIRRKRLDWC  | Furin | >gi 134268640 ref NP_005413.2    | tectorin alpha     |
| 69  | 92  | TWREKRLLYS  | Furin | >gi 14043042 ref NP_112477.1     | chemokine (C-C     |
| 46  | 55  | GERFRDLVK   | Furin | >gi 14043042 ref NP_112477.1     | chemokine (C-C     |
| 33  | 23  | SSRRRRSSST  | Furin | >gi 25777647 ref NP_740721.1     | small conducta     |

|     |                      |                                                                                     |
|-----|----------------------|-------------------------------------------------------------------------------------|
| 42  | 59 IKRKWRSWKV Furin  | >gi 29171759 ref NP_001109.2  adenylate cyclase                                     |
| 58  | 62 AERKMRDDER Furin  | >gi 38049007 ref NP_067003.2  sister-of-mamrin                                      |
| 26  | 33 SPRQKRDANS Furin  | >gi 46370066 ref NP_000118.2  exostosin 1 [Homo sapiens]                            |
| 29  | 44 DSRCDRDNTE Furin  | >gi 46370066 ref NP_000118.2  exostosin 1 [Homo sapiens]                            |
| 48  | 74 PERRKRFPGK Furin  | >gi 61743952 ref NP_060831.2  1-acylglycerol-3-O-acyltransferase                    |
| 109 | 164 ERRYARKIEP Furin | >gi 94681046 ref NP_064569.3  cyclin M4 [Homo sapiens]                              |
| 111 | 108 DNRSRKRVSE Furin | >gi 94681046 ref NP_064569.3  cyclin M4 [Homo sapiens]                              |
| 7   | 9 ERLLKRIISH Furin   | >gi 11415040 ref NP_068813.1  matriptase [Homo sapiens]                             |
| 82  | 103 RHRQGRVISV Furin | >gi 154816172 ref NP_001094299.1  transmembrane protein                             |
| 35  | 71 IARPKKRAET Furin  | >gi 25121966 ref NP_002232.2  potassium inward-rectifying channel subunit Kir2.1    |
| 69  | 110 NGRCRRTVSM Furin | >gi 4506971 ref NP_003040.1  solute carrier family 12 member 1                      |
| 43  | 45 EVRSKRDPPI Furin  | >gi 4885543 ref NP_005381.1  pyruvate dehydrogenase E1 component                    |
| 54  | 57 HSREGRSKAL Furin  | >gi 50233848 ref NP_001001965.1  olfactory receptor neuron marker 1                 |
| 22  | 27 HAVVARSVNG Furin  | >gi 54607120 ref NP_002334.2  lactotransferrin                                      |
| 98  | 128 AARRARVWC Furin  | >gi 54607120 ref NP_002334.2  lactotransferrin                                      |
| 45  | 76 QQRKKRATHS Furin  | >gi 110431348 ref NP_005206.2  deleted in colorectal cancer                         |
| 53  | 79 DVRSRRPADT Furin  | >gi 166362728 ref NP_001954.2  epidermal growth factor receptor                     |
| 83  | 71 VKREKRGNGW Furin  | >gi 22547161 ref NP_036325.2  frizzled 4 [Homo sapiens]                             |
| 47  | 55 YGRCKRDCLF Furin  | >gi 82734219 ref NP_001032588.1  beta-defensin 2                                    |
| 164 | 175 HFRGRRSLEF Furin | >gi 109150416 ref NP_036425.1  peroxidase                                           |
| 59  | 93 GRRKGRSQSV Furin  | >gi 134254443 ref NP_055616.3  pecanex-like 2                                       |
| 51  | 77 PLRQNRSRSI Furin  | >gi 139948432 ref NP_056234.2  adlcan [Homo sapiens]                                |
| 17  | 34 GGRTKRYVVF Furin  | >gi 139948432 ref NP_056234.2  adlcan [Homo sapiens]                                |
| 297 | 355 GRRALRSVSR Furin | >gi 149158723 ref NP_112509.3  N-terminal EF-hand domain                            |
| 58  | 97 NLRKRRDTGG Furin  | >gi 183583553 ref NP_694996.5  collagen type I alpha 1 chain                        |
| 49  | 59 QGRQGRSGQK Furin  | >gi 183583553 ref NP_694996.5  collagen type I alpha 1 chain                        |
| 35  | 46 NNRPWRPAEG Furin  | >gi 189083719 ref NP_001121113.1  laminin beta 1                                    |
| 29  | 28 RERSIKSVPE Furin  | >gi 190343023 ref NP_001162.4  ATP-binding cassette transporter                     |
| 37  | 38 ELRHRRHQQ Furin   | >gi 222418645 ref NP_689504.2  mucin 7 secreted                                     |
| 32  | 57 TYRAKRTTKR Furin  | >gi 4502819 ref NP_000731.1  cholinergic receptor nicotinic alpha 5 subunit         |
| 98  | 85 LSRQKREIDV Furin  | >gi 4757752 ref NP_004664.1  angiotensin-like 1                                     |
| 114 | 134 KHRTKRSAFF Furin | >gi 6631090 ref NP_001554.2  interphotoreceptor retinoid-binding protein            |
| 85  | 98 EARLRRVVGQ Furin  | >gi 92110027 ref NP_060129.2  glutaminyl-peptidyl transferase                       |
| 57  | 74 LLRRRRNVHD Furin  | >gi 116517319 ref NP_009102.3  protein-O-mannosyltransferase                        |
| 20  | 22 KARKGKSSSA Furin  | >gi 119964726 ref NP_000867.2  insulin-like growth factor 1                         |
| 25  | 45 ERVHKRSAER Furin  | >gi 148727288 ref NP_002327.2  low density lipoprotein receptor                     |
| 112 | 143 IARHYRWALG Furin | >gi 167857778 ref NP_002397.2  mannosyl (alpha-1-6) N-acetylglucosaminyltransferase |
| 55  | 80 FRRFKRSAQF Furin  | >gi 32307144 ref NP_000293.2  lysyl hydroxylase                                     |
| 87  | 98 SQWEKRSRGQ Furin  | >gi 4557669 ref NP_000409.1  interleukin 4 receptor                                 |
| 74  | 106 MGRMKREITT Furin | >gi 52145310 ref NP_004276.2  hexose-6-phosphate                                    |
| 78  | 73 LSRRRRNKRY Furin  | >gi 5729929 ref NP_006681.1  matrix metalloproteinase                               |

|     |     |                   |                                                   |
|-----|-----|-------------------|---------------------------------------------------|
| 121 | 178 | RRRNKRYALT Furin  | >gi 5729929 ref NP_006681.1  matrix metallopr     |
| 35  | 42  | GGRSKRDPDL Furin  | >gi 7019577 ref NP_037383.1  tachykinin 3 [Hoi    |
| 50  | 70  | PRRQRRLVLV Furin  | >gi 118582257 ref NP_003046.2  vesicular acety    |
| 84  | 95  | RSRSERDVLL Furin  | >gi 118582257 ref NP_003046.2  vesicular acety    |
| 43  | 45  | KQRGKRAITD Furin  | >gi 13899303 ref NP_113649.1  cysteine-rich se    |
| 144 | 188 | NRRRARAVHD Furin  | >gi 145977198 ref NP_001078851.1  prosaposin      |
| 46  | 43  | PSRPWRDLPE Furin  | >gi 157041215 ref NP_054788.2  SPR1 protein [     |
| 77  | 85  | HSIKKRSLRS Furin  | >gi 21314764 ref NP_443171.2  Fc receptor-like    |
| 61  | 67  | KKRSLRSQIR Furin  | >gi 21314764 ref NP_443171.2  Fc receptor-like    |
| 21  | 20  | HLREKRFCTG Furin  | >gi 23308733 ref NP_056470.1  zinc finger prot    |
| 18  | 20  | KKRKKKHKRKN Furin | >gi 42560244 ref NP_004783.2  peptidylprolyl is   |
| 63  | 41  | RDRFRRSETP Furin  | >gi 42560244 ref NP_004783.2  peptidylprolyl is   |
| 87  | 83  | RSRRVRSRTH Furin  | >gi 42560244 ref NP_004783.2  peptidylprolyl is   |
| 126 | 168 | YRRRGRSRSR Furin  | >gi 42560244 ref NP_004783.2  peptidylprolyl is   |
| 79  | 116 | RRRRRRDSRS Furin  | >gi 42560244 ref NP_004783.2  peptidylprolyl is   |
| 33  | 41  | RRRDSRSSER Furin  | >gi 42560244 ref NP_004783.2  peptidylprolyl is   |
| 33  | 31  | NSREKKADR Furin   | >gi 42560244 ref NP_004783.2  peptidylprolyl is   |
| 117 | 149 | RARSLRFVTL Furin  | >gi 4557010 ref NP_001601.1  acid phosphatase     |
| 83  | 91  | HIRRRRDVVT Furin  | >gi 46909590 ref NP_003806.3  alpha-5 integrin an |
| 79  | 104 | HSPLKRSVSL Furin  | >gi 50811834 ref NP_056404.2  sterile alpha mo    |
| 100 | 92  | CIRKRRLVAP Furin  | >gi 73747829 ref NP_039269.2  ligase III DNA A    |
| 52  | 59  | PPRARRHSDG Furin  | >gi 11345450 ref NP_068739.1  secretin prepro     |
| 59  | 59  | RQRVKRVLMG Furin  | >gi 116325993 ref NP_001006608.2  c114 SLIT-1     |
| 143 | 155 | LERHLRSAGS Furin  | >gi 167830411 ref NP_000897.3  natriuretic pep    |
| 65  | 71  | SLRCRRCVVV Furin  | >gi 5454058 ref NP_006269.1  ST3 beta-galacto     |
| 97  | 142 | CNRRKKEVRK Furin  | >gi 6631102 ref NP_002581.2  protocadherin 8      |
| 76  | 103 | KHRRARFLHE Furin  | >gi 110227626 ref NP_001036002.1  solute carr     |
| 32  | 34  | PHREKRGGET Furin  | >gi 203098629 ref NP_663736.2  acyl-Coenzyme      |
| 46  | 66  | ISRKKRMAKY Furin  | >gi 218505670 ref NP_002345.2  epithelial cell    |
| 71  | 92  | HSRPQRLIDH Furin  | >gi 22749021 ref NP_689703.1  beta-1 3-N-acet     |
| 24  | 33  | KKRKKRKSPK Furin  | >gi 45243534 ref NP_982354.1  protocadherin 9     |
| 85  | 105 | PQRLRRQKLS Furin  | >gi 94536854 ref NP_079093.2  thrombospondi       |
| 35  | 47  | SSRHRSQGA Furin   | >gi 94536854 ref NP_079093.2  thrombospondi       |
| 46  | 45  | RSRSGRSIIN Furin  | >gi 94536854 ref NP_079093.2  thrombospondi       |
| 51  | 56  | QRRRRRDTHF Furin  | >gi 10863973 ref NP_066998.1  hepcidin antimi     |
| 60  | 66  | IGREKRSNSQ Furin  | >gi 115529463 ref NP_002733.2  protein kinase     |
| 12  | 15  | NSPSKRGNST Furin  | >gi 29789403 ref NP_776152.1  PDZ domain coi      |
| 83  | 98  | FKRTRRSINS Furin  | >gi 33624896 ref NP_891550.1  ADAM metallo        |
| 40  | 51  | HRRTKRFLSY Furin  | >gi 33624896 ref NP_891550.1  ADAM metallo        |
| 737 | 894 | HSRSRRAYLA Furin  | >gi 59823631 ref NP_660333.2  G protein-coup      |
| 46  | 39  | RKRIKRAGGF Furin  | >gi 63003905 ref NP_640338.2  protein phosph      |

|     |     |             |       |                                                 |
|-----|-----|-------------|-------|-------------------------------------------------|
| 167 | 204 | AWRSRRDREE  | Furin | >gi 145386578 ref NP_001078816.1  torsin fam    |
| 99  | 129 | ALRQKRAVAT  | Furin | >gi 148719673 ref NP_056049.4  G-protein cou    |
| 35  | 48  | RSQKRTVEM   | Furin | >gi 188497754 ref NP_000179.2  hexokinase 1 i   |
| 162 | 234 | KSRLRRTMLV  | Furin | >gi 4501997 ref NP_000676.1  angiotensin II rec |
| 179 | 206 | HCRLRRSLGE  | Furin | >gi 4503999 ref NP_000155.1  gastric inhibitory |
| 61  | 96  | PARERRGREQ  | Furin | >gi 7657178 ref NP_055069.1  transmembrane      |
| 26  | 41  | PRRYKRPGLP  | Furin | >gi 18152775 ref NP_542780.1  beta-1 3-glucur   |
| 26  | 40  | SFRLKRNIGY  | Furin | >gi 194097327 ref NP_000803.2  gamma-aminc      |
| 90  | 114 | KGRIRRRASQ  | Furin | >gi 194097327 ref NP_000803.2  gamma-aminc      |
| 40  | 44  | RSRTPRGLDD  | Furin | >gi 24497587 ref NP_640340.2  adenylate cycla   |
| 125 | 140 | VGRRVRSYGQ  | Furin | >gi 4503653 ref NP_003636.1  solute carrier far |
| 64  | 59  | RDRQKRREER  | Furin | >gi 45580707 ref NP_703157.2  heparan sulfate   |
| 43  | 60  | YQRRSRSSSR  | Furin | >gi 5174405 ref NP_006069.1  voltage-depende    |
| 60  | 91  | HRRQKRI IGG | Furin | >gi 4506143 ref NP_003610.1  neurotrypsin pre   |
| 119 | 113 | HSRRKRLRHR  | Furin | >gi 143770755 ref NP_057447.4  glycoprotein V   |
| 178 | 182 | LCRHRRLRGP  | Furin | >gi 24308436 ref NP_612404.1  methionine-tRN    |
| 101 | 102 | VKRPRRYLYQ  | Furin | >gi 40316933 ref NP_954642.1  osteocalcin pre   |
| 29  | 53  | KSRSGRHVVF  | Furin | >gi 218083142 ref NP_076436.3  chitinase dom    |
| 10  | 12  | LRRTTRSVVH  | Furin | >gi 22208982 ref NP_002767.2  kallikrein-relate |
| 48  | 70  | DSRLKRQVTE  | Furin | >gi 24308233 ref NP_065877.1  synaptotagmin     |
| 130 | 175 | LERRKRSVAQ  | Furin | >gi 4503625 ref NP_000495.1  coagulation factc  |
| 59  | 83  | RRRQKRRTGA  | Furin | >gi 4507181 ref NP_003114.1  sialophorin [Hor   |
| 43  | 65  | VGRVKRFIQE  | Furin | >gi 4507835 ref NP_000364.1  uridine monophc    |
| 106 | 128 | VVRARRQLGT  | Furin | >gi 5174633 ref NP_006062.1  receptor for egg   |
| 46  | 57  | FKRKKRIKRR  | Furin | >gi 5174633 ref NP_006062.1  receptor for egg   |
| 43  | 37  | RFRPRRSEKQ  | Furin | >gi 58197554 ref NP_001010866.1  transmemb      |
| 99  | 128 | LTRSRRDGRK  | Furin | >gi 9256614 ref NP_061760.1  protocadherin bc   |
| 64  | 92  | GARKKRAAGQ  | Furin | >gi 142976884 ref NP_056530.2  phospholipase    |
| 91  | 115 | HQREKRGWTM  | Furin | >gi 142976884 ref NP_056530.2  phospholipase    |
| 27  | 29  | EIRQARAVPQ  | Furin | >gi 150010577 ref NP_003976.2  tyrosine kinas   |
| 109 | 122 | SPRQRRAITV  | Furin | >gi 24308527 ref NP_714544.1  stereocilin [Hor  |
| 54  | 83  | KARARRTLGH  | Furin | >gi 4503595 ref NP_000493.1  eosinophil perox   |
| 93  | 124 | RCREKRRGVT  | Furin | >gi 47519929 ref NP_387504.2  cell recognition  |
| 37  | 49  | MQRAPRSDA   | Furin | >gi 48475062 ref NP_001001557.1  growth diffe   |
| 89  | 121 | GRRRRRTAFA  | Furin | >gi 48475062 ref NP_001001557.1  growth diffe   |
| 83  | 98  | STRVRRQLDR  | Furin | >gi 6996021 ref NP_000388.2  cytochrome b-24    |
| 66  | 65  | EKRQKRDPAF  | Furin | >gi 7019323 ref NP_037470.1  dolichyl-phospha   |
| 55  | 89  | PSRQKRSVEN  | Furin | >gi 153070262 ref NP_005579.2  meprin A alph    |
| 75  | 97  | LCRYRRVITV  | Furin | >gi 10304987 ref NP_066191.1  UDP-Gal:betaG     |
| 98  | 112 | SSRHRRTATGA | Furin | >gi 4508045 ref NP_003451.1  zona pellucida gl  |
| 122 | 140 | NVRRKRYAIQ  | Furin | >gi 4826834 ref NP_004986.1  matrix metallopr   |

|     |     |             |       |                                                 |
|-----|-----|-------------|-------|-------------------------------------------------|
| 98  | 117 | WIRSRKAVDW  | Furin | >gi 5803173 ref NP_006740.1  solute carrier far |
| 48  | 59  | AARMKRKVGGA | Furin | >gi 10864011 ref NP_067022.1  sulfide dehydro   |
| 117 | 130 | RERSGRSRSR  | Furin | >gi 155029550 ref NP_849150.3  chromosome !     |
| 33  | 49  | RSREMRALAC  | Furin | >gi 155029550 ref NP_849150.3  chromosome !     |
| 8   | 5   | GPRKRRAPHG  | Furin | >gi 157743252 ref NP_115599.2  pecanex-like 3   |
| 59  | 49  | KGRKPRDLEL  | Furin | >gi 166362730 ref NP_005220.2  ELK1 protein [   |
| 90  | 127 | LSRASRSIRI  | Furin | >gi 21361497 ref NP_054768.2  acyl-Coenzyme     |
| 61  | 79  | SHRHKRVGTL  | Furin | >gi 30795238 ref NP_775099.2  ATP-binding cas   |
| 39  | 50  | KSFRGGRGFTV | Furin | >gi 30795238 ref NP_775099.2  ATP-binding cas   |
| 80  | 98  | NRRKKRALDA  | Furin | >gi 4507463 ref NP_003229.1  transforming gro   |
| 170 | 231 | PSRSRRRSRV  | Furin | >gi 46488921 ref NP_996991.1  astrotactin isof  |
| 81  | 99  | PGREDRFFCP  | Furin | >gi 50301234 ref NP_741999.3  J-type co-chape   |
| 93  | 103 | MIRRRRYEGH  | Furin | >gi 52694656 ref NP_078791.2  WD repeat dom     |
| 46  | 36  | KPRVRKSLKK  | Furin | >gi 55770842 ref NP_000558.2  C-reactive prote  |
| 69  | 84  | LNRYKRAGES  | Furin | >gi 6912236 ref NP_036230.1  angiopoietin-like  |
| 38  | 52  | LNRRKKQVGT  | Furin | >gi 90970328 ref NP_001035096.1  R-spondin fi   |
| 28  | 39  | RLRKGRSEDI  | Furin | >gi 9910280 ref NP_064505.1  UDP-glucose ceri   |
| 98  | 108 | PCRPQRSACH  | Furin | >gi 10198656 ref NP_065434.1  anti-Mullerian f  |
| 73  | 86  | RRRKRYALT   | Furin | >gi 4505211 ref NP_002419.1  matrix metallopr   |
| 56  | 74  | LSRVRRAWVI  | Furin | >gi 4826669 ref NP_004924.1  cadherin 15 prep   |
| 28  | 43  | RAAVRRLVGN  | Furin | >gi 51477716 ref NP_006113.2  mannosidase a     |
| 137 | 163 | TSRRKRAKVE  | Furin | >gi 58761546 ref NP_055828.2  amine oxidase (   |
| 77  | 110 | RRRCQRDAMC  | Furin | >gi 7657025 ref NP_055235.1  dickkopf homolo    |
| 143 | 205 | VQRLRRGGDP  | Furin | >gi 10190746 ref NP_065956.1  retinol dehydro   |
| 92  | 105 | QARWKRP AFT | Furin | >gi 147907090 ref NP_001005203.2  olfactory r   |
| 71  | 97  | RSRTKRSWVW  | Furin | >gi 16306489 ref NP_004352.2  cadherin 7 type   |
| 24  | 42  | GPRFKRLADM  | Furin | >gi 16306489 ref NP_004352.2  cadherin 7 type   |
| 18  | 11  | MSRIFRHSSV  | Furin | >gi 194018492 ref NP_997290.2  transmembran     |
| 118 | 126 | SKRLGRSIDD  | Furin | >gi 21361787 ref NP_060729.2  tetratricopeptic  |
| 51  | 66  | PFRSKRQEGV  | Furin | >gi 40217820 ref NP_055741.2  slit and trk like |
| 49  | 60  | ELRRVRS AEE | Furin | >gi 4502659 ref NP_003821.1  sialic acid bindin |
| 54  | 43  | NARAARSL LQ | Furin | >gi 55770876 ref NP_004548.3  notch4 preprop    |
| 47  | 64  | PIRRKRSIEE  | Furin | >gi 77695917 ref NP_002598.4  platelet-derivec  |
| 205 | 255 | HARFRRGARS  | Furin | >gi 14702169 ref NP_127509.1  plasminogen ac    |
| 47  | 56  | SQRRKKALEI  | Furin | >gi 150036268 ref NP_004002.2  dystrophin Dp    |
| 59  | 66  | QGRFDRSVEK  | Furin | >gi 150036268 ref NP_004002.2  dystrophin Dp    |
| 50  | 60  | SDRKKRLEE Q | Furin | >gi 150036268 ref NP_004002.2  dystrophin Dp    |
| 74  | 82  | KFRTKRYFAK  | Furin | >gi 150036268 ref NP_004002.2  dystrophin Dp    |
| 90  | 134 | NHVYRRSLGK  | Furin | >gi 153218487 ref NP_714916.3  KDEL (Lys-Asp    |
| 32  | 50  | VLSRRSQIN   | Furin | >gi 16418419 ref NP_443170.1  Fc receptor-like  |
| 74  | 69  | LGRHYRSNSP  | Furin | >gi 27754771 ref NP_002578.2  protocadherin :   |

|     |     |            |       |                                  |                  |
|-----|-----|------------|-------|----------------------------------|------------------|
| 52  | 60  | LIRRRRSILF | Furin | >gi 57242793 ref NP_057331.2     | interphotorece   |
| 23  | 29  | PARELRNVGV | Furin | >gi 93141047 ref NP_004361.3     | collagen type X  |
| 33  | 32  | AHRDKKSLQ  | Furin | >gi 93141047 ref NP_004361.3     | collagen type X  |
| 11  | 14  | LQRQKRDWVI | Furin | >gi 14589889 ref NP_001783.2     | cadherin 2 type  |
| 20  | 17  | NGRPLRSSER | Furin | >gi 164698517 ref NP_001106970.1 | MAM dom          |
| 92  | 96  | NHRNRRRVCK | Furin | >gi 22902134 ref NP_001759.3     | CD8 antigen alp  |
| 3   | 10  | LQRKKKLVST | Furin | >gi 51889724 ref NP_001004127.1  | asparagine-      |
| 64  | 78  | CRRNKRIWAS | Furin | >gi 93352554 ref NP_001004334.2  | GPR158-like      |
| 54  | 91  | WLRQRRTVGQ | Furin | >gi 11321571 ref NP_003053.1     | slit homolog 3 [ |
| 22  | 35  | WLRKRRIVSG | Furin | >gi 11321571 ref NP_003053.1     | slit homolog 3 [ |
| 92  | 88  | PTRSKRRKYV | Furin | >gi 11321571 ref NP_003053.1     | slit homolog 3 [ |
| 75  | 86  | LKKIKRSVSP | Furin | >gi 11875211 ref NP_055761.2     | spastin isoform  |
| 15  | 24  | LWRKSRSPHN | Furin | >gi 27436871 ref NP_775100.1     | carboxypeptida   |
| 52  | 77  | LRRQIRTVIQ | Furin | >gi 31542547 ref NP_056158.2     | dullard homolo   |
| 52  | 61  | RRRHRKHSPQ | Furin | >gi 4758250 ref NP_004084.1      | ephrin B2 [Homc  |
| 47  | 54  | NNRKIRVNGT | Furin | >gi 49170034 ref NP_003629.1     | integrin alpha { |
| 70  | 72  | LSRKSRDMEI | Furin | >gi 52317170 ref NP_001004453.1  | olfactory re     |
| 74  | 109 | LSRKKRADKK | Furin | >gi 5729769 ref NP_006527.1      | chloride channel |
| 47  | 54  | QARLTRSNSK | Furin | >gi 166197668 ref NP_055022.2    | CD5 molecule     |
| 53  | 65  | RTRRKREKTQ | Furin | >gi 27881494 ref NP_775082.1     | zonadhesin isof  |
| 149 | 186 | LGRRRRVVPE | Furin | >gi 40254442 ref NP_002664.2     | plexin B1 [Hom   |
| 17  | 18  | PPRPRRGSLR | Furin | >gi 40254442 ref NP_002664.2     | plexin B1 [Hom   |
| 47  | 37  | IPRYKRMVER | Furin | >gi 40254442 ref NP_002664.2     | plexin B1 [Hom   |
| 122 | 171 | RSRSRAATS  | Furin | >gi 5453579 ref NP_006120.1      | bone morphoger   |
| 46  | 29  | RYRRRRSRSS | Furin | >gi 7656948 ref NP_055220.1      | voltage-depende  |
| 38  | 53  | RRRRSRSSSR | Furin | >gi 7656948 ref NP_055220.1      | voltage-depende  |
| 33  | 48  | QQRSKRAAPA | Furin | >gi 118600977 ref NP_056507.2    | C3 and PZP-lik   |
| 22  | 29  | AQRRRRSSVF | Furin | >gi 118600977 ref NP_056507.2    | C3 and PZP-lik   |
| 32  | 53  | DSRTNRDMHG | Furin | >gi 13376271 ref NP_079126.1     | butyrophilin-lik |
| 35  | 57  | SFRKVRDKIS | Furin | >gi 14196468 ref NP_114442.1     | protocadherin {  |
| 52  | 39  | KRRPRRMTPF | Furin | >gi 16418465 ref NP_443203.1     | liver-expressed  |
| 63  | 91  | LCRKRRCSL  | Furin | >gi 16418465 ref NP_443203.1     | liver-expressed  |
| 140 | 175 | RGRLRRLWI  | Furin | >gi 42476333 ref NP_001030.2     | sodium channe    |
| 65  | 76  | ESRKRREAES | Furin | >gi 42476333 ref NP_001030.2     | sodium channe    |
| 22  | 30  | PGRDGRDGT  | Furin | >gi 4757760 ref NP_004788.1      | adiponectin prec |
| 82  | 84  | MFRVRRNAKK | Furin | >gi 47778921 ref NP_001849.2     | alpha 1 type XI  |
| 75  | 104 | IGRSRRVQCH | Furin | >gi 164698546 ref NP_001026919.2 | LY6/PLAUF        |
| 68  | 115 | RRRMKRVWDR | Furin | >gi 221139815 ref NP_001137416.1 | LEM doma         |
| 48  | 60  | PRRRRSLPR  | Furin | >gi 4503463 ref NP_001947.1      | endothelin 2 pre |
| 66  | 95  | LTRLRRPIGK | Furin | >gi 4506341 ref NP_002849.1      | ATP-binding cass |
| 31  | 51  | KSRIKKDKKE | Furin | >gi 54792105 ref NP_001006627.1  | cholinergic      |



|     |                      |                                                 |
|-----|----------------------|-------------------------------------------------|
| 36  | 34 PSREKKVTRT Furin  | >gi 54792105 ref NP_001006627.1  cholinergic    |
| 129 | 164 PERCRRQFQE Furin | >gi 194394139 ref NP_848588.3  notum pectinase  |
| 107 | 117 RCRMLRSVFS Furin | >gi 21265113 ref NP_003954.2  transmembrane     |
| 95  | 96 LSRGKRELRLM Furin | >gi 4501945 ref NP_001115.1  adrenomedullin     |
| 62  | 65 RIRVKRYRQS Furin  | >gi 4501945 ref NP_001115.1  adrenomedullin     |
| 140 | 174 GRRRRRSLPE Furin | >gi 4501945 ref NP_001115.1  adrenomedullin     |
| 81  | 100 LARGRRSLGS Furin | >gi 4505681 ref NP_002599.1  platelet-derived   |
| 64  | 57 ETRSARDTAQ Furin  | >gi 62912479 ref NP_005507.3  major histocomp   |
| 38  | 50 KRRTKKAKMK Furin  | >gi 90093355 ref NP_085150.1  jumonji C doma    |
| 20  | 17 ITRWKRDSGG Furin  | >gi 13129010 ref NP_076952.1  nudix-type mot    |
| 41  | 42 RERNKRSTQI Furin  | >gi 134304838 ref NP_004827.4  eukaryotic tra   |
| 19  | 30 PHRQRKESET Furin  | >gi 134304838 ref NP_004827.4  eukaryotic tra   |
| 189 | 224 GQRQARHYHQ Furin | >gi 150378552 ref NP_056366.1  sushi domain c   |
| 69  | 108 KTRHARQASE Furin | >gi 156627559 ref NP_071427.2  tenomodulin [    |
| 74  | 120 SERQNRSVRL Furin | >gi 27894376 ref NP_006605.2  cell adhesion m   |
| 56  | 50 HSRNKRLSIS Furin  | >gi 31543076 ref NP_660359.2  transmembrane     |
| 73  | 118 YQRHYRNVFH Furin | >gi 41462412 ref NP_958928.1  solute carrier fa |
| 47  | 41 RGVTKRSLSP Furin  | >gi 4505579 ref NP_002560.1  furin preproprot   |
| 58  | 71 KRRTKRDVYQ Furin  | >gi 4505579 ref NP_002560.1  furin preproprot   |
| 44  | 84 KADKRRSVRI Furin  | >gi 4557695 ref NP_000213.1  v-kit Hardy-Zuck   |
| 59  | 74 SVRKRRVRKD Furin  | >gi 4758004 ref NP_004353.1  calmegin [Homo     |
| 45  | 90 KRRVRKDGQA Furin  | >gi 4758004 ref NP_004353.1  calmegin [Homo     |
| 87  | 128 LLRAARSRGA Furin | >gi 7262393 ref NP_000024.2  ATP-binding cass   |
| 45  | 58 RSRVLRENGK Furin  | >gi 8923857 ref NP_060917.1  transmembrane      |
| 85  | 119 LSRFPRFVNV Furin | >gi 11342670 ref NP_001691.1  azurocidin 1 pre  |
| 32  | 47 AQRQRRYKKT Furin  | >gi 18379366 ref NP_005848.2  zinc metallopep   |
| 71  | 92 NNRGRRQKQN Furin  | >gi 29568105 ref NP_003683.2  transmembrane     |
| 50  | 59 LHRAKKGLGM Furin  | >gi 4504849 ref NP_002237.1  potassium chanr    |
| 65  | 95 DWRERRNAIR Furin  | >gi 110611170 ref NP_620688.2  ADAM metallic    |
| 43  | 50 SSRDPRAAIQ Furin  | >gi 71834872 ref NP_849196.2  tumor different   |
| 28  | 28 MGRGKRQATA Furin  | >gi 11545918 ref NP_071447.1  tubulointerstiti  |
| 94  | 116 PERYRRHGTH Furin | >gi 11545918 ref NP_071447.1  tubulointerstiti  |
| 51  | 46 NVVFKRDAHG Furin  | >gi 148833508 ref NP_060087.3  notch1 prepro    |
| 65  | 86 GRRRRRELDP Furin  | >gi 148833508 ref NP_060087.3  notch1 prepro    |
| 85  | 92 LSRKRRRQHG Furin  | >gi 148833508 ref NP_060087.3  notch1 prepro    |
| 36  | 30 KARRKKSQDG Furin  | >gi 148833508 ref NP_060087.3  notch1 prepro    |
| 67  | 62 HQRTKRSWVW Furin  | >gi 16306537 ref NP_114097.2  cadherin 20 ty    |
| 87  | 102 ANRTGRACEC Furin | >gi 4504777 ref NP_000880.1  integrin beta 7 [  |
| 34  | 49 QFRSKRSKNQ Furin  | >gi 55770886 ref NP_006528.2  ubiquitin thiole  |
| 57  | 53 RNRNQRIVQL Furin  | >gi 4503011 ref NP_001299.1  carboxypeptidas    |
| 56  | 76 FGRRRRDLQA Furin  | >gi 76880478 ref NP_001029125.1  calcitonin is  |

|     |     |            |       |                                  |                   |
|-----|-----|------------|-------|----------------------------------|-------------------|
| 55  | 67  | NQRPKRLDSA | Furin | >gi 83281200 ref NP_776175.2     | protogenin [Ho    |
| 58  | 94  | RYRFVRSVMS | Furin | >gi 9789987 ref NP_036413.1      | potassium voltag  |
| 73  | 80  | RAAERRSVIR | Furin | >gi 116268097 ref NP_542172.2    | beta-1 3-galac    |
| 198 | 214 | PARRRRLYWG | Furin | >gi 116268097 ref NP_542172.2    | beta-1 3-galac    |
| 40  | 58  | GSRWRRSDIL | Furin | >gi 18254464 ref NP_543140.1     | relaxin 3 preprc  |
| 44  | 40  | ISRPRRRCSP | Furin | >gi 4503053 ref NP_001875.1      | hyaluronan and    |
| 161 | 213 | TQRSKRALKQ | Furin | >gi 4503647 ref NP_000123.1      | coagulation factc |
| 48  | 64  | GGRGKRSLDG | Furin | >gi 5031821 ref NP_005705.1      | potassium chanr   |
| 82  | 94  | RNRQKRFVLS | Furin | >gi 58331148 ref NP_005931.2     | matrix metallo    |
| 25  | 48  | ASRGARVVK  | Furin | >gi 9256618 ref NP_061762.1      | protocadherin be  |
| 11  | 13  | PARVSKDVED | Furin | >gi 104526627 ref NP_006064.2    | triadin [Homo     |
| 98  | 151 | FHRRARASDR | Furin | >gi 13259533 ref NP_000481.2     | arginine vasopr   |
| 67  | 89  | NQRKIRIKGI | Furin | >gi 151301150 ref NP_079505.1    | sel-1 suppress    |
| 44  | 81  | FQRVKRGVW  | Furin | >gi 16445393 ref NP_004052.2     | cadherin 12 ty    |
| 64  | 75  | MGREIRSEEP | Furin | >gi 23110964 ref NP_001326.2     | cathepsin W pr    |
| 40  | 60  | TPRSKRLLSD | Furin | >gi 23199983 ref NP_005473.1     | phosphatidylinc   |
| 41  | 41  | QQRFKRKDRM | Furin | >gi 110347461 ref NP_002374.2    | MYC-associate     |
| 6   | 7   | RRRAKRSPKH | Furin | >gi 157276593 ref NP_001193.2    | bone morpho       |
| 40  | 57  | PERERRSEEP | Furin | >gi 4503041 ref NP_000747.1      | corticotropin rel |
| 42  | 50  | QRREQRDICE | Furin | >gi 7657619 ref NP_055282.1      | sushi-repeat-con  |
| 65  | 99  | PQPQRRAVEP | Furin | >gi 119226222 ref NP_056315.1    | C2 calcium-de     |
| 79  | 119 | VRRRRRYALS | Furin | >gi 11968059 ref NP_071913.1     | matrix metallo    |
| 32  | 42  | PARLHRFWEG | Furin | >gi 11968059 ref NP_071913.1     | matrix metallo    |
| 98  | 90  | DYRGRRKTGE | Furin | >gi 149193321 ref NP_002083.3    | G-rich RNA sec    |
| 104 | 139 | RGRSRRLQQR | Furin | >gi 52351208 ref NP_061183.2     | solute carrier fa |
| 37  | 53  | KSRLKRLCSS | Furin | >gi 8922243 ref NP_060474.1      | transmembrane     |
| 44  | 56  | IRRQKREWIK | Furin | >gi 119703744 ref NP_001933.2    | desmoglein 1      |
| 162 | 229 | TDRCRRGFGV | Furin | >gi 222136622 ref NP_001123355.3 | prostate a        |
| 35  | 50  | PNRDQRDKDG | Furin | >gi 31543806 ref NP_003239.2     | thrombospondi     |
| 50  | 59  | TVRSLRSEFK | Furin | >gi 10835197 ref NP_000857.1     | 5-hydroxytrypti   |
| 147 | 186 | IARALRNWVQ | Furin | >gi 109240536 ref NP_653223.2    | DC-STAMP do       |
| 86  | 106 | VSRLRRVICA | Furin | >gi 109240536 ref NP_653223.2    | DC-STAMP do       |
| 58  | 78  | RSVRRRAADQ | Furin | >gi 109240536 ref NP_653223.2    | DC-STAMP do       |
| 133 | 166 | WSRARRDDPH | Furin | >gi 126723295 ref NP_570970.2    | retinoic acid e   |
| 172 | 255 | ESRSRRRSGR | Furin | >gi 21265058 ref NP_620686.1     | a disintegrin-lik |
| 52  | 39  | SGRAKRFVSI | Furin | >gi 21265058 ref NP_620686.1     | a disintegrin-lik |
| 39  | 37  | TARPKRKGKC | Furin | >gi 30425553 ref NP_848663.1     | reticulon 4 rece  |
| 25  | 36  | RSRNGRWEES | Furin | >gi 38371739 ref NP_941959.1     | RAB15 membe       |
| 61  | 64  | RGRGGRDHGD | Furin | >gi 4503037 ref NP_003842.1      | cellular represso |
| 91  | 125 | AARVARFVTH | Furin | >gi 4503037 ref NP_003842.1      | cellular represso |
| 58  | 82  | ALRSARSAPE | Furin | >gi 5031719 ref NP_005699.1      | glypican 6 precu  |

|     |     |                   |                                                 |
|-----|-----|-------------------|-------------------------------------------------|
| 207 | 231 | DVRCRRLVRE Furin  | >gi 46094076 ref NP_056331.2  tsukushin [Hom    |
| 73  | 91  | SQRWKRTQRH Furin  | >gi 8922532 ref NP_060615.1  family with sequ   |
| 117 | 136 | VARRRRFPFV Furin  | >gi 8922532 ref NP_060615.1  family with sequ   |
| 76  | 92  | VSRNARHADG Furin  | >gi 4507897 ref NP_003372.1  vasoactive intest  |
| 26  | 49  | KMRNKRNSKM Furin  | >gi 5174497 ref NP_006024.1  endothelial lipas  |
| 79  | 73  | HGRQERSTKE Furin  | >gi 117553608 ref NP_008910.2  solute carrier t |
| 19  | 16  | RRRPTRPLEV Furin  | >gi 119395746 ref NP_000207.2  Kallmann sync    |
| 112 | 172 | SARRFRVVSQ Furin  | >gi 14277675 ref NP_002579.2  protocadherin g   |
| 59  | 79  | PSRVARDVAV Furin  | >gi 17136148 ref NP_001174.2  ATPase H+ trar    |
| 44  | 37  | WNRKNRQIQD Furin  | >gi 190358520 ref NP_064501.2  follistatin-like |
| 45  | 71  | KAKRRRSLHH Furin  | >gi 20336244 ref NP_002585.2  proprotein con    |
| 67  | 115 | FDRKKRGYRD Furin  | >gi 20336244 ref NP_002585.2  proprotein con    |
| 40  | 64  | LSRRPRDDDS Furin  | >gi 20336244 ref NP_002585.2  proprotein con    |
| 50  | 46  | TGREKRPSRS Furin  | >gi 218749848 ref NP_001136336.1  family with   |
| 92  | 105 | EKRPSRSGGR Furin  | >gi 218749848 ref NP_001136336.1  family with   |
| 117 | 124 | YWRDKRLAYS Furin  | >gi 4503867 ref NP_000805.1  gamma-aminobu      |
| 17  | 25  | PQRQKKLAEK Furin  | >gi 4503867 ref NP_000805.1  gamma-aminobu      |
| 156 | 189 | CCRRKRSRKP Furin  | >gi 4757886 ref NP_004330.1  pituitary tumor-t  |
| 109 | 153 | PKRSRRDFGL Furin  | >gi 4885259 ref NP_005250.1  myostatin [Homc    |
| 0   | 2   | NRRMKRILQR Furin  | >gi 58743316 ref NP_001011717.1  neuromedir     |
| 105 | 103 | FHRACRLVHD Furin  | >gi 6005737 ref NP_009184.1  cytochrome P450    |
| 29  | 53  | KSRVSRLAGR Furin  | >gi 153252201 ref NP_036451.3  solute carrier t |
| 71  | 96  | SKRKKRKAAP Furin  | >gi 183227675 ref NP_001116848.1  transmem      |
| 64  | 78  | SPRCKRTVLD Furin  | >gi 208022668 ref NP_001129076.1  endothelia    |
| 29  | 36  | PLRKRKRKKK Furin  | >gi 4502461 ref NP_001720.1  betacellulin [Hor  |
| 14  | 12  | RKRKRKKKKE Furin  | >gi 4502461 ref NP_001720.1  betacellulin [Hor  |
| 17  | 38  | KRRKRKKKKEE Furin | >gi 4502461 ref NP_001720.1  betacellulin [Hor  |
| 21  | 42  | RKRKKKKEEEM Furin | >gi 4502461 ref NP_001720.1  betacellulin [Hor  |
| 28  | 29  | GRRLRRRTSH Furin  | >gi 50659093 ref NP_056089.1  mannosidase a     |
| 24  | 30  | PRRRRKSLKT Furin  | >gi 5902808 ref NP_006119.1  bone morphoger     |
| 52  | 58  | PGRRGRPGLK Furin  | >gi 7705753 ref NP_057075.1  complement con     |
| 30  | 39  | LARPRRDAEP Furin  | >gi 110349792 ref NP_001483.3  growth differe   |
| 67  | 85  | SGRSFRSGDG Furin  | >gi 110556629 ref NP_775904.2  transmembrar     |
| 85  | 102 | RARFRRAANR Furin  | >gi 145309304 ref NP_001398.2  cadherin EGF I   |
| 31  | 27  | PPRRTRDLDP Furin  | >gi 145309304 ref NP_001398.2  cadherin EGF I   |
| 69  | 75  | LRRHKRDWV Furin   | >gi 14589891 ref NP_001784.2  cadherin 3 type   |
| 57  | 52  | LVRKKRRIKE Furin  | >gi 14589891 ref NP_001784.2  cadherin 3 type   |
| 74  | 99  | GSRFKKLADM Furin  | >gi 14589891 ref NP_001784.2  cadherin 3 type   |
| 19  | 24  | RQRAKRNAVL Furin  | >gi 27262632 ref NP_006124.1  neural stem cel   |
| 36  | 32  | SGREGRDGP Furin   | >gi 4502961 ref NP_000085.1  alpha 1 type VII c |
| 34  | 45  | RNRKRKRGSD Furin  | >gi 4506783 ref NP_003855.1  Sin3A-associated   |

|     |     |             |       |                                                 |
|-----|-----|-------------|-------|-------------------------------------------------|
| 20  | 45  | NRRKRKGSDD  | Furin | >gi 4506783 ref NP_003855.1  Sin3A-associated   |
| 32  | 32  | LRRYKRHFKL  | Furin | >gi 4506783 ref NP_003855.1  Sin3A-associated   |
| 44  | 80  | PHRRRRKVLA  | Furin | >gi 62952502 ref NP_899230.2  cytochrome P450   |
| 15  | 16  | RRRKGRNKEI  | Furin | >gi 75677385 ref NP_001028260.2  neugrin ne     |
| 21  | 41  | PQRPRRPASP  | Furin | >gi 166197660 ref NP_000597.2  complement c     |
| 46  | 60  | LHRNKRTCSEA | Furin | >gi 21264363 ref NP_006601.2  mannan-bindin     |
| 117 | 106 | RSRWGRSAQG  | Furin | >gi 23110980 ref NP_690594.1  immunoglobuli     |
| 73  | 87  | RSRWGRFLLQ  | Furin | >gi 13399298 ref NP_064455.1  immunoglobuli     |
| 11  | 10  | QWRSRRSYSC  | Furin | >gi 13399298 ref NP_064455.1  immunoglobuli     |
| 41  | 47  | PSRAGRACEG  | Furin | >gi 145580582 ref NP_775839.3  uromodulin-lil   |
| 88  | 110 | LMRPKRSHHC  | Furin | >gi 30425538 ref NP_848661.1  zinc finger DHF   |
| 24  | 44  | NARYSRSSAA  | Furin | >gi 46249414 ref NP_996826.1  latent transfor   |
| 115 | 103 | SERTRRTSKP  | Furin | >gi 46249414 ref NP_996826.1  latent transfor   |
| 61  | 77  | KGRPARFLDS  | Furin | >gi 157694524 ref NP_055918.2  plexin D1 [Hor   |
| 27  | 40  | PMRSKKIFGS  | Furin | >gi 167900484 ref NP_002843.2  pentraxin 3 [H   |
| 147 | 158 | TTRVRRRSVQ  | Furin | >gi 209969800 ref NP_694957.3  RPE-spondin [    |
| 56  | 83  | TRVRRRSVQQ  | Furin | >gi 209969800 ref NP_694957.3  RPE-spondin [    |
| 93  | 139 | SHRRQRRVAG  | Furin | >gi 4885329 ref NP_005295.1  free fatty acid re |
| 106 | 112 | HRRQRRVAGL  | Furin | >gi 4885329 ref NP_005295.1  free fatty acid re |
| 57  | 81  | HFRKKRSEYY  | Furin | >gi 8394398 ref NP_058639.1  taste receptor T2  |
| 74  | 101 | SFRFPRTWWQ  | Furin | >gi 93204871 ref NP_067052.2  netrin 4 [Homo    |
| 52  | 54  | WSMSKRDVLD  | Furin | >gi 117414168 ref NP_997191.2  nucleoporin 2    |
| 67  | 64  | KRMQKRSVTA  | Furin | >gi 31881792 ref NP_858043.1  leukotriene B4    |
| 69  | 98  | ARRFRRSRRT  | Furin | >gi 31881792 ref NP_858043.1  leukotriene B4    |
| 20  | 38  | CARKFRDLLK  | Furin | >gi 34147522 ref NP_064632.2  chaperone ABC     |
| 51  | 71  | EGREKRHRKK  | Furin | >gi 38348412 ref NP_940970.1  gap junction pr   |
| 11  | 16  | SNRSARAAAA  | Furin | >gi 4502547 ref NP_001733.1  calcitonin recept  |
| 90  | 127 | KNRLRRILEV  | Furin | >gi 4557691 ref NP_000411.1  Kell blood group   |
| 163 | 248 | ARRARRGTSG  | Furin | >gi 7656967 ref NP_055061.1  cadherin EGF LA    |
| 203 | 225 | LVRALRSATQ  | Furin | >gi 7656967 ref NP_055061.1  cadherin EGF LA    |
| 76  | 83  | ISRRRRHPDD  | Furin | >gi 7656967 ref NP_055061.1  cadherin EGF LA    |
| 11  | 15  | RGIGKRSVEY  | Furin | >gi 79749430 ref NP_997244.3  FRAS1-related e   |
| 14  | 9   | KSRKKREIRS  | Furin | >gi 79749430 ref NP_997244.3  FRAS1-related e   |
| 51  | 83  | LDRTKRQIPH  | Furin | >gi 79749430 ref NP_997244.3  FRAS1-related e   |
| 65  | 89  | KSLSKRSLRD  | Furin | >gi 110835708 ref NP_008864.3  solute carrier t |
| 58  | 70  | SKRSLRDLME  | Furin | >gi 110835708 ref NP_008864.3  solute carrier t |
| 128 | 162 | PSRKRRSLGD  | Furin | >gi 119395736 ref NP_000199.2  insulin recept   |
| 58  | 80  | HLRVKRGVWV  | Furin | >gi 12656655 ref NP_066976.1  cadherin 19 typ   |
| 67  | 59  | GPRFKRLACM  | Furin | >gi 12656655 ref NP_066976.1  cadherin 19 typ   |
| 35  | 45  | RRRMRRRPGP  | Furin | >gi 145699105 ref NP_699199.2  connexin40.1     |
| 86  | 95  | PWRLRRSKRC  | Furin | >gi 154800437 ref NP_001946.3  endothelin 1 [   |

|     |     |                   |                                                 |
|-----|-----|-------------------|-------------------------------------------------|
| 8   | 4   | LRRSKRCSCS Furin  | >gi 154800437 ref NP_001946.3  endothelin 1 [   |
| 41  | 61  | SPRSKRALEN Furin  | >gi 154800437 ref NP_001946.3  endothelin 1 [   |
| 14  | 24  | SARRKRKKHR Furin  | >gi 24429572 ref NP_722516.1  TBP-associated    |
| 84  | 97  | VHRFARHVSP Furin  | >gi 52693925 ref NP_001005329.1  olfactory re   |
| 117 | 157 | ERRRRRGALR Furin  | >gi 71773208 ref NP_000674.2  alpha-2C-adren    |
| 84  | 106 | LSRRRRRARSS Furin | >gi 71773208 ref NP_000674.2  alpha-2C-adren    |
| 5   | 10  | RRRRARSSVC Furin  | >gi 71773208 ref NP_000674.2  alpha-2C-adren    |
| 40  | 40  | QAREKRF'TFV Furin | >gi 71773208 ref NP_000674.2  alpha-2C-adren    |
| 128 | 147 | FRRRRRGFRQ Furin  | >gi 71773208 ref NP_000674.2  alpha-2C-adren    |
| 36  | 35  | PVREARAVIF Furin  | >gi 73486661 ref NP_001082.2  amiloride bindi   |
| 39  | 45  | AFRFKRKLPK Furin  | >gi 73486661 ref NP_001082.2  amiloride bindi   |
| 89  | 92  | RPRPRRELSL Furin  | >gi 24586659 ref NP_699165.2  scavenger rece    |
| 101 | 116 | HHRFPRAAHP Furin  | >gi 56711322 ref NP_060233.3  ring finger prot  |
| 60  | 83  | PQRKRRGGPS Furin  | >gi 56711322 ref NP_060233.3  ring finger prot  |
| 63  | 69  | RSEFKRCWKG Furin  | >gi 82734223 ref NP_001032589.1  beta-defens    |
| 115 | 167 | YHRHTRSIFW Furin  | >gi 13375618 ref NP_055577.1  24-dehydrocho     |
| 56  | 85  | RGRYSRGVLS Furin  | >gi 23308597 ref NP_694545.1  adenomatosis p    |
| 36  | 45  | SNRQPRKQGG Furin  | >gi 24308277 ref NP_071421.1  SPARC related r   |
| 150 | 201 | KSRQMRSVDV Furin  | >gi 4557391 ref NP_000057.1  complement con     |
| 18  | 20  | IRRTKRF'SHT Furin | >gi 4557391 ref NP_000057.1  complement con     |
| 71  | 80  | KDRNKRDTMV Furin  | >gi 4557391 ref NP_000057.1  complement con     |
| 30  | 50  | VQRVFRDAGA Furin  | >gi 47106073 ref NP_998769.1  ADAMTS-like 5     |
| 31  | 54  | STRKARIISQ Furin  | >gi 14195605 ref NP_066008.1  protocadherin l   |
| 23  | 36  | MSRGDRFSED Furin  | >gi 194097398 ref NP_002832.3  protein tyrosir  |
| 52  | 64  | SHRERRDAGR Furin  | >gi 28372569 ref NP_778226.1  zona pellucida-l  |
| 78  | 73  | WGRVWRATSS Furin  | >gi 41055953 ref NP_060688.1  ubiquitin thioes  |
| 50  | 67  | KKRRRRRKES Furin  | >gi 4504851 ref NP_003731.1  potassium chanr    |
| 122 | 152 | PRRRARSLAL Furin  | >gi 47578099 ref NP_065184.2  selenoprotein M   |
| 52  | 59  | SGGARRSVIG Furin  | >gi 57165410 ref NP_056071.2  acyl-CoA synthe   |
| 9   | 24  | RARAARRAAG Furin  | >gi 61835232 ref NP_878248.2  growth differen   |
| 121 | 125 | GRRRRRTALA Furin  | >gi 61835232 ref NP_878248.2  growth differen   |
| 22  | 25  | RARGPRRASA Furin  | >gi 13236528 ref NP_077277.1  fukutin-related   |
| 98  | 88  | LARMMRPVSD Furin  | >gi 171906582 ref NP_064583.2  coiled-coil dor  |
| 55  | 49  | VPRQKRSIVV Furin  | >gi 4502719 ref NP_001248.1  cadherin 13 prep   |
| 52  | 71  | RQPFPRDVGK Furin  | >gi 4502719 ref NP_001248.1  cadherin 13 prep   |
| 13  | 26  | PQRLPRATGN Furin  | >gi 45504369 ref NP_995322.1  solute carrier fa |
| 94  | 116 | NCRHERDAGV Furin  | >gi 5031863 ref NP_005558.1  galectin 3 bindin  |
| 16  | 17  | SSREARVVSD Furin  | >gi 9256608 ref NP_061757.1  protocadherin be   |
| 59  | 88  | SGPHYLMMTA NA     | NA                                              |
| 38  | 57  | YKPVYYTASG NA     | NA                                              |
| 88  | 97  | KYHAWMTASG NA     | NA                                              |

|    |                   |    |
|----|-------------------|----|
| 32 | 54 HKIALLTASG NA  | NA |
| 48 | 40 SGISWMRHTA NA  | NA |
| 42 | 46 VLFGALTASG NA  | NA |
| 6  | 19 TSPGLLTASG NA  | NA |
| 93 | 82 MPMGRLTASG NA  | NA |
| 22 | 32 VFPQGMTASG NA  | NA |
| 10 | 10 SSPLNYTASG NA  | NA |
| 20 | 28 NSPMSLTASG NA  | NA |
| 48 | 48 EHPGLLTASG NA  | NA |
| 28 | 32 PSLAELTASG NA  | NA |
| 15 | 32 RAPLPVTASG NA  | NA |
| 75 | 97 YSTLRTASGA NA  | NA |
| 32 | 39 ATLAAWTASG NA  | NA |
| 84 | 114 GRPLNLSTAS NA | NA |
| 24 | 16 EAIGRLTASG NA  | NA |
| 6  | 12 ERPFFLTASG NA  | NA |
| 20 | 22 SRPVYLTASG NA  | NA |
| 48 | 55 GWIATLRTAS NA  | NA |
| 27 | 29 PSLGQLTASG NA  | NA |
| 42 | 60 LAPRYWTASG NA  | NA |
| 30 | 31 HVVAQLTASG NA  | NA |
| 49 | 57 SGPVSMRYTA NA  | NA |
| 68 | 70 GGIAAMRTAS NA  | NA |
| 38 | 37 SGPSGWTATA NA  | NA |
| 22 | 14 VDVSFLTASG NA  | NA |
| 36 | 53 HVVAKMTASG NA  | NA |
| 11 | 12 FAPAEVTASG NA  | NA |
| 15 | 25 GVPRAVTASG NA  | NA |
| 19 | 10 ESIRGLTASG NA  | NA |
| 35 | 36 SYPRAYTASG NA  | NA |
| 37 | 39 VLLGNFTASG NA  | NA |
| 34 | 39 SGPRNLAVTA NA  | NA |
| 29 | 40 SVPSAITASG NA  | NA |
| 49 | 69 GRPAGVKTAS NA  | NA |
| 31 | 18 RRPVAYTASG NA  | NA |
| 17 | 15 GVPSKLTASG NA  | NA |
| 40 | 47 VKPSKLTASG NA  | NA |
| 38 | 50 KSISNWTASG NA  | NA |
| 22 | 32 NAPNALTASG NA  | NA |
| 34 | 37 MGLANLTASG NA  | NA |
| 42 | 57 STIAHYTASG NA  | NA |

|    |     |               |    |
|----|-----|---------------|----|
| 27 | 38  | RKLAFLTASG NA | NA |
| 72 | 102 | GFPRAFRTAS NA | NA |
| 17 | 10  | HAPSLYTASG NA | NA |
| 20 | 19  | TVLGNLTASG NA | NA |
| 53 | 71  | SGASNLRGTA NA | NA |
| 30 | 36  | NRPSWVTASG NA | NA |
| 55 | 58  | GMPRAYRTAS NA | NA |
| 21 | 26  | GVLRLNLTAS NA | NA |
| 28 | 31  | IAPAKLTASG NA | NA |
| 81 | 80  | GNPAQMRTAS NA | NA |
| 37 | 34  | AMPKHLTASG NA | NA |
| 62 | 56  | SGPGAMMFTA NA | NA |
| 19 | 39  | LQIGHLTASG NA | NA |
| 39 | 49  | GHIAWFTASG NA | NA |
| 13 | 9   | GGPSTLTASG NA | NA |
| 36 | 46  | GAPAKLRTAS NA | NA |
| 34 | 52  | SGPASFSVTA NA | NA |
| 20 | 23  | CAPTALTASG NA | NA |
| 43 | 48  | SGVAWLKHTA NA | NA |
| 20 | 23  | GAPARFTTAS NA | NA |
| 38 | 49  | PCPTGLTASG NA | NA |
| 34 | 46  | SGPRQLSTTA NA | NA |
| 23 | 14  | MALSSLTASG NA | NA |
| 28 | 31  | TQPSPFTASG NA | NA |
| 15 | 22  | KRLAFLTASG NA | NA |
| 7  | 10  | FQIGSLTASG NA | NA |
| 38 | 27  | RVVANLTASG NA | NA |
| 27 | 29  | LQLALYTASG NA | NA |
| 38 | 42  | WYPSKLTASG NA | NA |
| 51 | 50  | WNPSYLTASG NA | NA |
| 0  | 2   | PKPARLTASG NA | NA |
| 32 | 33  | KQLASLTASG NA | NA |
| 53 | 46  | SGPRGMKTTA NA | NA |
| 35 | 44  | GEPSAYRTAS NA | NA |
| 21 | 18  | LGPSHYTASG NA | NA |
| 62 | 61  | QMPLQITASG NA | NA |
| 37 | 25  | KVLSAVTASG NA | NA |
| 51 | 44  | NIPTRLTASG NA | NA |
| 28 | 30  | RHPSHFTASG NA | NA |
| 42 | 48  | KMPSTLTASG NA | NA |
| 40 | 61  | YHPISLTASG NA | NA |

|     |                   |    |
|-----|-------------------|----|
| 33  | 42 YASIRTASGA NA  | NA |
| 16  | 24 SGPASLLNTA NA  | NA |
| 123 | 132 GSHAALRTAS NA | NA |
| 37  | 35 EWPSRMTASG NA  | NA |
| 20  | 30 ILLSPLTASG NA  | NA |
| 27  | 23 SGPASVRNTA NA  | NA |
| 57  | 80 MWVLSLTASG NA  | NA |
| 7   | 14 SSVSNLTASG NA  | NA |
| 44  | 52 PTLQYLTASG NA  | NA |
| 31  | 27 FYFSNLTASG NA  | NA |
| 14  | 25 WAINALTASG NA  | NA |
| 104 | 114 FKAVALTASG NA | NA |
| 16  | 17 KSPTGLTASG NA  | NA |
| 18  | 21 RGPSSYTASG NA  | NA |
| 54  | 50 IFARSLTASG NA  | NA |
| 21  | 26 SGPRAVSATA NA  | NA |
| 64  | 79 SGPSHWIGTA NA  | NA |
| 12  | 15 QRPMDLTASG NA  | NA |
| 18  | 22 PTPRSYTASG NA  | NA |
| 19  | 23 TPPVELTASG NA  | NA |
| 59  | 49 PKLAAITASG NA  | NA |
| 13  | 24 GHPSPFTASG NA  | NA |
| 18  | 20 PQMGSLTASG NA  | NA |
| 5   | 7 TPPSSLTASG NA   | NA |
| 27  | 29 SGPSALDATA NA  | NA |
| 94  | 129 GLARALKTAS NA | NA |
| 98  | 116 GRPAQMKTAS NA | NA |
| 29  | 43 QVPRRLTASG NA  | NA |
| 88  | 97 GVVGALRTAS NA  | NA |
| 21  | 20 FHPSRFTASG NA  | NA |
| 30  | 51 SRPRTL TASG NA | NA |
| 12  | 16 RAPVAFTASG NA  | NA |
| 53  | 72 WDIRSLTASG NA  | NA |
| 18  | 24 MSLATLTASG NA  | NA |
| 38  | 33 GRPSFLKTAS NA  | NA |
| 67  | 69 VQLAYFTASG NA  | NA |
| 16  | 16 QRVAAVTASG NA  | NA |
| 15  | 27 IGVRALTASG NA  | NA |
| 33  | 57 GTPRNIKTAS NA  | NA |
| 21  | 29 SVPSTLTASG NA  | NA |
| 20  | 20 LPPLGFTASG NA  | NA |



|     |     |             |    |
|-----|-----|-------------|----|
| 46  | 47  | SGPRTLVTNA  | NA |
| 25  | 23  | GGPAPMWTAS  | NA |
| 48  | 70  | SGPVAMTKTA  | NA |
| 16  | 28  | GGSGNLTVKT  | NA |
| 24  | 29  | VYPGKMTASG  | NA |
| 66  | 59  | GMPGRLSTAS  | NA |
| 48  | 71  | MFVRKLTASG  | NA |
| 69  | 71  | GMPLGLRTAS  | NA |
| 18  | 27  | RDMSYLTASG  | NA |
| 11  | 8   | TDIGEITASG  | NA |
| 25  | 47  | VMPSGFTASG  | NA |
| 23  | 27  | GYFANLTASG  | NA |
| 28  | 33  | SGPQWMINTA  | NA |
| 31  | 48  | GTPIELYTAS  | NA |
| 94  | 82  | SGISALRKTA  | NA |
| 60  | 71  | KGPSGLTASG  | NA |
| 23  | 24  | VGP AFLTASG | NA |
| 62  | 58  | SQLGLLTASG  | NA |
| 10  | 27  | RDLGFLTASG  | NA |
| 38  | 38  | GWPSELRTAS  | NA |
| 42  | 53  | SVLSKLTASG  | NA |
| 18  | 26  | NPPSHLTASG  | NA |
| 45  | 50  | TMLLALTASG  | NA |
| 35  | 35  | ATLAALTASG  | NA |
| 32  | 45  | GSPLPFITAS  | NA |
| 29  | 43  | SGPKLLTASG  | NA |
| 49  | 62  | FEPQRMTASG  | NA |
| 121 | 134 | HYVRAHTASG  | NA |
| 64  | 71  | MGPWFMTASG  | NA |
| 43  | 50  | GVPRYLRTAS  | NA |
| 46  | 41  | HTVRNVTASG  | NA |
| 35  | 32  | SGVKWLMSTA  | NA |
| 68  | 71  | GEPLFLRTAS  | NA |
| 37  | 36  | GFVFELRTAS  | NA |
| 42  | 52  | GRPRSLLTAS  | NA |
| 22  | 17  | KRVYLLTASG  | NA |
| 15  | 22  | KIPSALTASG  | NA |
| 17  | 14  | LIPAWLTASG  | NA |
| 15  | 25  | SLPLLLTASG  | NA |
| 49  | 51  | SGPKLLYGTA  | NA |
| 164 | 184 | SGPRNYHGTA  | NA |

|     |     |                |    |
|-----|-----|----------------|----|
| 42  | 44  | SGPKQLRVTA NA  | NA |
| 45  | 54  | AHPSALTASG NA  | NA |
| 26  | 32  | WGTLALTASG NA  | NA |
| 17  | 26  | GSPRNLRTAS NA  | NA |
| 45  | 56  | HRPEWYTASG NA  | NA |
| 14  | 23  | MSPKGVVTASG NA | NA |
| 33  | 38  | GMVRGVVTASG NA | NA |
| 32  | 62  | TIPSWSTASG NA  | NA |
| 56  | 87  | SGWRAYTGTA NA  | NA |
| 28  | 44  | RFPLKVTASG NA  | NA |
| 14  | 25  | YGPRAITASG NA  | NA |
| 30  | 27  | LVVRAHTASG NA  | NA |
| 27  | 40  | SNPFKYTASG NA  | NA |
| 56  | 69  | GYPAGLRTAS NA  | NA |
| 23  | 30  | SDVRFLTASG NA  | NA |
| 5   | 3   | KAPAHLTASG NA  | NA |
| 48  | 45  | GRPVNLTTAS NA  | NA |
| 24  | 33  | RVPVPMVTASG NA | NA |
| 21  | 26  | QPPHAFTASG NA  | NA |
| 45  | 43  | SGPSRLTFTA NA  | NA |
| 37  | 48  | KHPYKYTASG NA  | NA |
| 31  | 39  | SGPRGVTVTA NA  | NA |
| 16  | 24  | RTPKGLTASG NA  | NA |
| 44  | 56  | SKPWKLTASG NA  | NA |
| 49  | 51  | SGVRAIRQTA NA  | NA |
| 25  | 34  | RQPRNVTASG NA  | NA |
| 14  | 30  | EGPMRLTASG NA  | NA |
| 16  | 30  | FLPRMLTASG NA  | NA |
| 77  | 95  | SGPSWIMRTA NA  | NA |
| 36  | 47  | RLVNWMTASG NA  | NA |
| 25  | 52  | GLPAALTTAS NA  | NA |
| 55  | 59  | GDPRWLSTAS NA  | NA |
| 16  | 17  | LIPTSLTASG NA  | NA |
| 11  | 13  | FDVWMLTASG NA  | NA |
| 51  | 76  | GLVWNLWTAS NA  | NA |
| 30  | 43  | VEAVAITASG NA  | NA |
| 11  | 14  | KSPRPYTASG NA  | NA |
| 29  | 32  | SQPMAYTASG NA  | NA |
| 21  | 21  | SGVKGMYSTA NA  | NA |
| 124 | 129 | RMWRAFTASG NA  | NA |
| 44  | 73  | GMPLLLRTAS NA  | NA |

|    |                   |    |
|----|-------------------|----|
| 26 | 36 TVPWSVTASG NA  | NA |
| 29 | 47 SCVRMMTASG NA  | NA |
| 21 | 25 IAPEFLTASG NA  | NA |
| 56 | 56 HTVYWMTASG NA  | NA |
| 31 | 41 SGVRDLYFTA NA  | NA |
| 32 | 28 HTVRGLTASG NA  | NA |
| 9  | 13 IGVRQLTASG NA  | NA |
| 23 | 30 QRVRGVTASG NA  | NA |
| 1  | 3 WRPFSYTASG NA   | NA |
| 94 | 103 LKVMNYTASG NA | NA |
| 25 | 39 SGVLSLQSTA NA  | NA |
| 29 | 38 GVPRGVRTAS NA  | NA |
| 7  | 9 WSPSSYTASG NA   | NA |
| 37 | 33 PTWRGLTASG NA  | NA |
| 35 | 54 GNPLGIRTAS NA  | NA |
| 18 | 20 NGPYNLTASG NA  | NA |
| 46 | 45 TLIRYLTASG NA  | NA |
| 40 | 45 GRATALYTAS NA  | NA |
| 45 | 79 SGPRWLMSTA NA  | NA |
| 22 | 24 TGPKLITASG NA  | NA |
| 5  | 6 TSARKLTASG NA   | NA |
| 37 | 31 RLPINLTASG NA  | NA |
| 32 | 32 SGPRFLLDTA NA  | NA |
| 75 | 77 SGPRSLKSTA NA  | NA |
| 36 | 40 SGAYNFQATA NA  | NA |
| 42 | 51 SGPRLYIGTA NA  | NA |
| 41 | 41 SGVAGLYSTA NA  | NA |
| 33 | 52 SGPKFLVMTA NA  | NA |
| 13 | 27 SGPRDILATA NA  | NA |
| 24 | 24 SGPFSNRATA NA  | NA |
| 34 | 29 MGPWGMTASG NA  | NA |
| 35 | 40 GSAIPLWTAS NA  | NA |
| 29 | 49 HVPRQVTASG NA  | NA |
| 32 | 65 GMLRAMHTAS NA  | NA |
| 29 | 26 RMPRQVTASG NA  | NA |
| 70 | 75 IMHRALTASG NA  | NA |
| 12 | 17 GFTRWLTASG NA  | NA |
| 27 | 43 SGPYSWQVTA NA  | NA |
| 33 | 46 GMVLGLHTAS NA  | NA |
| 45 | 56 SGVRSITWTA NA  | NA |
| 57 | 59 SGVWNLMSTA NA  | NA |

|    |                   |    |
|----|-------------------|----|
| 22 | 23 DSPLSLTASG NA  | NA |
| 72 | 54 WQVRYLTASG NA  | NA |
| 50 | 56 GQPRAIRTAS NA  | NA |
| 14 | 25 KDPKFLTASG NA  | NA |
| 27 | 45 YIPLVYTASG NA  | NA |
| 75 | 57 SGVRWSTSTA NA  | NA |
| 9  | 8 HMPLGLTASG NA   | NA |
| 31 | 62 YIPTAFTASG NA  | NA |
| 32 | 45 KFPWNYTASG NA  | NA |
| 24 | 42 WTPRGNTASG NA  | NA |
| 42 | 38 GYPRGLGTAS NA  | NA |
| 48 | 72 GRPSPFWTAS NA  | NA |
| 31 | 42 SGPRFLIGTA NA  | NA |
| 11 | 14 RQPFLLTASG NA  | NA |
| 10 | 16 QRWFALTASG NA  | NA |
| 28 | 28 RLPKLLTASG NA  | NA |
| 61 | 83 SGPKGMRMTA NA  | NA |
| 35 | 35 TNVFWYTASG NA  | NA |
| 33 | 32 RRPSALTASG NA  | NA |
| 35 | 42 MSPRKFTASG NA  | NA |
| 40 | 33 VVPNNLTASG NA  | NA |
| 21 | 30 GVPKNQMTAS NA  | NA |
| 34 | 41 GSGRGLWSET NA  | NA |
| 28 | 27 ILVWNYTASG NA  | NA |
| 24 | 29 SGVRAVYSTA NA  | NA |
| 31 | 64 SGVRGLFTTA NA  | NA |
| 54 | 58 SGPVHMWNTA NA  | NA |
| 24 | 48 SSPLALTASG NA  | NA |
| 25 | 42 VKPSGVTASG NA  | NA |
| 18 | 25 IFPANHTASG NA  | NA |
| 27 | 25 KFPASLTASG NA  | NA |
| 62 | 44 FIPMWSTASG NA  | NA |
| 11 | 9 NSPSDLTASG NA   | NA |
| 34 | 45 GMPRSYITAS NA  | NA |
| 19 | 29 RLPYPLTASG NA  | NA |
| 20 | 25 SGALNFYSTA NA  | NA |
| 36 | 30 GRPSAMTTAS NA  | NA |
| 41 | 59 ESIRHLTASG NA  | NA |
| 83 | 93 SGPRSWTNTA NA  | NA |
| 47 | 60 SGVRGMHGTA NA  | NA |
| 52 | 56 SGPLKITRRTA NA | NA |

|     |     |                |    |
|-----|-----|----------------|----|
| 46  | 48  | SGPWAITGTA NA  | NA |
| 30  | 35  | FIPFPFTASG NA  | NA |
| 62  | 74  | SGPKWMRHTA NA  | NA |
| 35  | 31  | FVVRLLTASG NA  | NA |
| 70  | 97  | GRLLAMHTAS NA  | NA |
| 58  | 73  | SGPRSHRVTA NA  | NA |
| 24  | 24  | YGPSLLTASG NA  | NA |
| 22  | 27  | TVPYQLTASG NA  | NA |
| 45  | 67  | SGVRWYSNTA NA  | NA |
| 59  | 63  | GSGRAMYGTT NA  | NA |
| 14  | 24  | SGPSSLFATA NA  | NA |
| 24  | 26  | GTPYGLVTAS NA  | NA |
| 8   | 11  | HAPRGSTASG NA  | NA |
| 32  | 26  | NVPVWMTASG NA  | NA |
| 12  | 26  | VPPRVLTASG NA  | NA |
| 39  | 49  | SGPKSLVRTA NA  | NA |
| 14  | 21  | KSPSLYTASG NA  | NA |
| 105 | 117 | SGARAMKWTA NA  | NA |
| 9   | 22  | SKPNFLTASG NA  | NA |
| 31  | 34  | LSVFWLTASG NA  | NA |
| 45  | 45  | SGPTNLRRTA NA  | NA |
| 26  | 32  | SGPMFLWTTA NA  | NA |
| 20  | 18  | YSPMDYTASG NA  | NA |
| 48  | 70  | KTVVWYTASG NA  | NA |
| 25  | 32  | IGALALTASG NA  | NA |
| 53  | 58  | GWPRELKTAS NA  | NA |
| 85  | 86  | GQPRSWRTAS NA  | NA |
| 34  | 64  | QPLSWVTASG NA  | NA |
| 21  | 18  | WLPRAVTASG NA  | NA |
| 10  | 16  | RAPASLTASG NA  | NA |
| 39  | 53  | SGAFNLYSTA NA  | NA |
| 22  | 28  | SLNRALTASG NA  | NA |
| 19  | 33  | TAPKLLTASG NA  | NA |
| 46  | 79  | GRPRGLTTAS NA  | NA |
| 48  | 53  | WMPPLGMTASG NA | NA |
| 30  | 26  | VFTRNLTASG NA  | NA |
| 27  | 25  | SGARNLLWTA NA  | NA |
| 32  | 44  | DPWRALTASG NA  | NA |
| 77  | 80  | SGPKWIIQTA NA  | NA |
| 24  | 18  | REPLTLTASG NA  | NA |
| 31  | 39  | GGPRSLFTAS NA  | NA |

|    |                   |    |
|----|-------------------|----|
| 23 | 27 QSPRMLTASG NA  | NA |
| 50 | 50 GSAVGLRTAS NA  | NA |
| 48 | 51 HYPLNSTASG NA  | NA |
| 26 | 17 LVGRALTASG NA  | NA |
| 39 | 27 SGVRHLINTA NA  | NA |
| 35 | 40 GNPYKLTASG NA  | NA |
| 46 | 42 SGPVNLISTA NA  | NA |
| 59 | 97 GFAWSLHTAS NA  | NA |
| 12 | 17 GAPRSLVTAS NA  | NA |
| 21 | 27 KSPVFLTASG NA  | NA |
| 61 | 66 GYARLLRTAS NA  | NA |
| 22 | 29 GRPRSLTASG NA  | NA |
| 22 | 32 HAPLNFTASG NA  | NA |
| 39 | 44 GIPRPVMTAS NA  | NA |
| 37 | 41 SGPRGQVFTA NA  | NA |
| 18 | 22 SGVWNLIMTA NA  | NA |
| 24 | 15 VMLRFLTASG NA  | NA |
| 45 | 50 SGVRHVRATA NA  | NA |
| 60 | 46 GIPYHLATAS NA  | NA |
| 49 | 54 GVARPLSTAS NA  | NA |
| 24 | 19 ATPESLTASG NA  | NA |
| 33 | 41 RLANALTASG NA  | NA |
| 92 | 111 KLGRALTASG NA | NA |
| 26 | 35 QGPWHITASG NA  | NA |
| 16 | 7 SQPIHMTASG NA   | NA |
| 9  | 14 IGPQFLTASG NA  | NA |
| 22 | 37 SGPQWITGTA NA  | NA |
| 50 | 61 SGPRSMLNTA NA  | NA |
| 70 | 89 HRHAHLTASG NA  | NA |
| 37 | 41 GMVQHLLITAS NA | NA |
| 33 | 37 ERSLNLTASG NA  | NA |
| 22 | 33 ARIEYLTASG NA  | NA |
| 27 | 27 DRPNYLTASG NA  | NA |
| 19 | 37 GAPRSLQTAS NA  | NA |
| 28 | 29 ESFAALTASG NA  | NA |
| 65 | 49 SGPHHLTLTA NA  | NA |
| 22 | 24 AVANSLTASG NA  | NA |
| 35 | 43 VLWRALTASG NA  | NA |
| 15 | 23 SGPAALLGTA NA  | NA |
| 42 | 59 SGVRFLMNTA NA  | NA |
| 41 | 45 RLPVAITASG NA  | NA |

|     |     |               |    |
|-----|-----|---------------|----|
| 33  | 40  | SGAHGLLLTA NA | NA |
| 15  | 20  | PRVEALTASG NA | NA |
| 48  | 66  | SGPLGIRYTA NA | NA |
| 33  | 32  | TSPVALTASG NA | NA |
| 65  | 77  | KKWRGLTASG NA | NA |
| 25  | 35  | WVMESLTASG NA | NA |
| 34  | 56  | KTWRNLTASG NA | NA |
| 45  | 30  | TTYMSLTASG NA | NA |
| 43  | 52  | PCHLALTASG NA | NA |
| 74  | 101 | HRWSALTASG NA | NA |
| 18  | 18  | ERFSLTASG NA  | NA |
| 74  | 77  | SGPYPLWKTA NA | NA |
| 26  | 25  | ARPEFLTASG NA | NA |
| 51  | 69  | GVYGALRTAS NA | NA |
| 45  | 69  | HRLLSLTASG NA | NA |
| 19  | 26  | EVARAMTASG NA | NA |
| 67  | 66  | SGPRSLYTTA NA | NA |
| 45  | 44  | PKWHGLTASG NA | NA |
| 36  | 45  | GDPYGMRTAS NA | NA |
| 38  | 31  | VIYGNLTASG NA | NA |
| 111 | 139 | GVYQGLRTAS NA | NA |
| 54  | 65  | GYPRNIGTAS NA | NA |
| 17  | 22  | YPFGLTASG NA  | NA |
| 38  | 38  | GTLRSLITAS NA | NA |
| 35  | 46  | PTFAHLTASG NA | NA |
| 35  | 33  | VRWSWLTASG NA | NA |
| 29  | 43  | VVLMGLTASG NA | NA |
| 16  | 32  | ARLGYLTASG NA | NA |
| 70  | 110 | HQWAALTASG NA | NA |
| 35  | 36  | ELVRSLTASG NA | NA |
| 31  | 49  | FVVRALTASG NA | NA |
| 56  | 51  | VDIRMLTASG NA | NA |
| 61  | 59  | GYPWAWRTAS NA | NA |
| 23  | 29  | GFPLMLTASG NA | NA |
| 30  | 57  | SGPLGLSGTA NA | NA |
| 91  | 85  | SGPMALSRTA NA | NA |
| 39  | 50  | SGPRPLLATA NA | NA |
| 38  | 22  | WPHGSLTASG NA | NA |
| 46  | 58  | VKPWALTASG NA | NA |
| 37  | 37  | NRVEMLTASG NA | NA |
| 44  | 47  | SGVNHLMTTA NA | NA |

|     |                   |    |
|-----|-------------------|----|
| 24  | 35 VLPEPLTASG NA  | NA |
| 27  | 36 GYPRAFSTAS NA  | NA |
| 29  | 40 FGPYAMTASG NA  | NA |
| 22  | 21 QAPMGLTASG NA  | NA |
| 32  | 28 ERVWAITASG NA  | NA |
| 58  | 84 GVIRFLRTAS NA  | NA |
| 52  | 34 YDSRGLTASG NA  | NA |
| 13  | 23 PYPVPFTASG NA  | NA |
| 32  | 42 YVPTGLTASG NA  | NA |
| 41  | 49 GHVRHLLTAS NA  | NA |
| 109 | 141 SGHRSLRSTA NA | NA |
| 138 | 143 GQARGLQTAS NA | NA |
| 24  | 13 GFPLMYATAS NA  | NA |
| 72  | 76 GNSWGLRTAS NA  | NA |
| 25  | 29 APYNHLTASG NA  | NA |
| 102 | 117 GHAYHLTASG NA | NA |
| 60  | 76 GRMLHLRTAS NA  | NA |
| 44  | 48 RQWYGITASG NA  | NA |
| 17  | 37 AAWASITASG NA  | NA |
| 43  | 43 GVVRGLSTAS NA  | NA |
| 32  | 20 RPPLAFTASG NA  | NA |
| 40  | 39 FMPRNTASGA NA  | NA |
| 45  | 63 GPVYNLRTAS NA  | NA |
| 28  | 33 KAVNHLTASG NA  | NA |
| 25  | 22 RTAHNLTASG NA  | NA |
| 54  | 53 VHFASLTASG NA  | NA |
| 32  | 39 TTPYHITASG NA  | NA |
| 8   | 14 WHPVSLTASG NA  | NA |
| 56  | 60 GWPNAFLTAS NA  | NA |
| 41  | 48 SGPRFIRLTA NA  | NA |
| 39  | 41 GVLRLSTAS NA   | NA |
| 60  | 63 WPMAKLTASG NA  | NA |
| 50  | 82 SGAHGILSTA NA  | NA |
| 43  | 52 GYPWSLSTAS NA  | NA |
| 13  | 16 STIRMLTASG NA  | NA |
| 52  | 54 GAPWGIHTAS NA  | NA |
| 41  | 60 RLPVHYTASG NA  | NA |
| 10  | 21 DLPAGLTASG NA  | NA |
| 32  | 69 ACIWSLTASG NA  | NA |
| 18  | 35 GDPYSLRTAS NA  | NA |
| 29  | 44 SGPVHLLNTA NA  | NA |



|     |                    |    |
|-----|--------------------|----|
| 27  | 26 FNPIHLTASG NA   | NA |
| 17  | 20 NSPLSYTASG NA   | NA |
| 44  | 47 SGPTALRATA NA   | NA |
| 45  | 44 VFPMSLTASG NA   | NA |
| 31  | 37 GSPYGLLTAS NA   | NA |
| 41  | 55 RLPWSLTASG NA   | NA |
| 15  | 22 RIPRFLTASG NA   | NA |
| 51  | 56 SGPRMLVLTA NA   | NA |
| 3   | 0 SGGSGLRILQ NA    | NA |
| 28  | 40 PKMSHLTASG NA   | NA |
| 46  | 59 SGAHGLLTTA NA   | NA |
| 12  | 16 TFPFMLTASG NA   | NA |
| 19  | 18 PRVHHLTASG NA   | NA |
| 35  | 68 SGGSGLWATP NA   | NA |
| 42  | 55 SGGSGLRVLK NA   | NA |
| 30  | 47 SNLNSTASGA NA   | NA |
| 41  | 58 SGPRALKGTA NA   | NA |
| 186 | 247 GHYHHLMTAS NA  | NA |
| 12  | 18 SQVRFLTASG NA   | NA |
| 32  | 36 GSPASLRTAS NA   | NA |
| 14  | 14 SFPNPLTASG NA   | NA |
| 32  | 53 SGVRAIIATA NA   | NA |
| 74  | 96 GQPRGLRTAS NA   | NA |
| 54  | 37 SLVRFLTASG NA   | NA |
| 36  | 41 VRPRPFTASG NA   | NA |
| 30  | 44 RTPIGITASG NA   | NA |
| 28  | 43 SYALHLTASG NA   | NA |
| 17  | 24 RKPAPWTASG NA   | NA |
| 14  | 13 RAPLHMTASG NA   | NA |
| 85  | 96 SGAMGLFRTA NA   | NA |
| 64  | 89 GAAHGIFTAS NA   | NA |
| 27  | 32 TFWGALTASG NA   | NA |
| 29  | 30 YYPRALTASG NA   | NA |
| 21  | 19 TRIAYLTASG NA   | NA |
| 23  | 26 ARVRHLTASG NA   | NA |
| 15  | 18 YDVYNLTASG NA   | NA |
| 76  | 89 SGGSGLRIGL NA   | NA |
| 110 | 158 GGS GALRVRG NA | NA |
| 36  | 39 GWPAGLTTAS NA   | NA |
| 47  | 49 GGYAGLRTAS NA   | NA |
| 40  | 36 SGVMGIRITA NA   | NA |

|     |     |                |    |
|-----|-----|----------------|----|
| 123 | 136 | GVYAHLLTAS NA  | NA |
| 58  | 70  | GRVAYLSTAS NA  | NA |
| 35  | 44  | VIPRPLTASG NA  | NA |
| 29  | 36  | ARSYNLTASG NA  | NA |
| 17  | 13  | RRPTNLTASG NA  | NA |
| 48  | 60  | GRLGNLWTAS NA  | NA |
| 21  | 42  | GNVRSLITAS NA  | NA |
| 15  | 15  | RVPYGLTASG NA  | NA |
| 20  | 21  | HVWMNLTASG NA  | NA |
| 22  | 34  | RTPMAMTASG NA  | NA |
| 47  | 52  | GAPRFLSTAS NA  | NA |
| 99  | 112 | SGSHGLRSTA NA  | NA |
| 59  | 80  | GSVHHLITAS NA  | NA |
| 46  | 43  | GRPADLRTAS NA  | NA |
| 32  | 30  | SKMAHLTASG NA  | NA |
| 85  | 110 | SGMAALKRTA NA  | NA |
| 33  | 42  | SGPHGFFQTA NA  | NA |
| 1   | 5   | SGVSFLQOTA NA  | NA |
| 40  | 58  | GNAIHLQTAS NA  | NA |
| 42  | 42  | MVPKWLSTASG NA | NA |
| 13  | 20  | RTGLYLTASG NA  | NA |
| 23  | 25  | RQWRALSTASG NA | NA |
| 22  | 24  | SVGLYLTASG NA  | NA |
| 70  | 101 | SGVYWLRSTA NA  | NA |
| 25  | 32  | TKMAWLSTASG NA | NA |
| 46  | 61  | GFSANLKTAS NA  | NA |
| 45  | 53  | DNTFHLLTASG NA | NA |
| 34  | 50  | AHYASLTASG NA  | NA |
| 25  | 32  | VQQQGLTASG NA  | NA |
| 35  | 51  | GSMNSLRTAS NA  | NA |
| 22  | 27  | RFPRPITASG NA  | NA |
| 37  | 49  | EHAWNLTASG NA  | NA |
| 9   | 31  | HTSNWLTASG NA  | NA |
| 27  | 58  | PHTASLTASG NA  | NA |
| 29  | 44  | GSLAHLTASG NA  | NA |
| 14  | 18  | SSVWHITASG NA  | NA |
| 38  | 39  | IDTRWYTASG NA  | NA |
| 18  | 27  | TVPQMITASG NA  | NA |
| 71  | 69  | FMPSAQTASG NA  | NA |
| 19  | 27  | GAPMNVVTAS NA  | NA |
| 66  | 101 | SGMGHLLHTA NA  | NA |

|     |                   |    |
|-----|-------------------|----|
| 37  | 38 RQLAAITASG NA  | NA |
| 116 | 115 GSGYHLRHTT NA | NA |
| 29  | 32 GVVLNLETAS NA  | NA |
| 32  | 44 MSLGYLTASG NA  | NA |
| 37  | 46 GSGHLLGMS NA   | NA |
| 21  | 19 DKLASLTASG NA  | NA |
| 30  | 54 SGRALTASG NA   | NA |
| 49  | 61 ELSLALTASG NA  | NA |
| 21  | 16 TVVAYITASG NA  | NA |
| 49  | 56 KFWFNLTASG NA  | NA |
| 25  | 29 WDALGITASG NA  | NA |
| 84  | 117 ERSLAWTASG NA | NA |
| 42  | 38 RLANNLTASG NA  | NA |
| 32  | 47 GAFRHLRTAS NA  | NA |
| 29  | 37 SEPFGLTASG NA  | NA |
| 119 | 165 MKWAAYTASG NA | NA |
| 26  | 29 GMPRYMTASG NA  | NA |
| 33  | 38 GTALPLRTAS NA  | NA |
| 16  | 19 RIPASLTASG NA  | NA |
| 38  | 53 PKGYALTASG NA  | NA |
| 58  | 73 GTLMGLYTAS NA  | NA |
| 39  | 40 AYGSHLTASG NA  | NA |
| 32  | 27 GIVRYLQTAS NA  | NA |
| 46  | 69 GCVRFLQTAS NA  | NA |
| 18  | 19 GMVFSIYTAS NA  | NA |
| 66  | 84 GEVRFLRTAS NA  | NA |
| 30  | 27 TATNWLRTASG NA | NA |
| 25  | 41 GVHFHLITAS NA  | NA |
| 48  | 50 DRQLSLTASG NA  | NA |
| 19  | 26 QEPRNITASG NA  | NA |
| 26  | 40 GRLRNLVTAS NA  | NA |
| 17  | 20 LNPAFLTASG NA  | NA |
| 17  | 25 GEVFSLTASG NA  | NA |
| 49  | 61 NHVWPLTASG NA  | NA |
| 31  | 65 GLPMHLTASG NA  | NA |
| 40  | 58 LAWAHITASG NA  | NA |
| 15  | 26 GSGAHLQLST NA  | NA |
| 20  | 29 TVTQNLRTASG NA | NA |
| 52  | 61 GSGRNRLRLQT NA | NA |
| 32  | 26 PSWRALTASG NA  | NA |
| 37  | 59 SGQRGIYATA NA  | NA |

|    |                   |    |
|----|-------------------|----|
| 68 | 79 MSWSALTASG NA  | NA |
| 19 | 35 SEWQGLTASG NA  | NA |
| 39 | 67 GFWSSLRTAS NA  | NA |
| 12 | 10 SRAYSLTASG NA  | NA |
| 34 | 37 HRPRSLTASG NA  | NA |
| 48 | 41 RTASHLTASG NA  | NA |
| 29 | 22 DAVYGLTASG NA  | NA |
| 59 | 60 KDYLHLTASG NA  | NA |
| 62 | 55 FPGRHLTASG NA  | NA |
| 16 | 14 YDISALTASG NA  | NA |
| 57 | 66 GIVGMLQTAS NA  | NA |
| 18 | 12 TILRNITASG NA  | NA |
| 50 | 66 SGPLGYTVTA NA  | NA |
| 60 | 82 GRARWLMTAS NA  | NA |
| 19 | 17 PAYFPLTASG NA  | NA |
| 44 | 35 YDIHFLTASG NA  | NA |
| 43 | 60 GTPMQLYTAS NA  | NA |
| 47 | 65 MSPRWLTASG NA  | NA |
| 26 | 24 SGTLNLYNTA NA  | NA |
| 34 | 29 FDAQSLTASG NA  | NA |
| 36 | 44 SGALHLKATA NA  | NA |
| 8  | 10 APVLALTASG NA  | NA |
| 40 | 44 HRQQNLTASG NA  | NA |
| 36 | 51 GGSGNLTMGs NA  | NA |
| 33 | 35 GQVDYLMTAS NA  | NA |
| 21 | 31 TQVFGLTASG NA  | NA |
| 21 | 20 SGSLALQSTA NA  | NA |
| 29 | 53 SGWAPLLRTA NA  | NA |
| 37 | 38 VKAYNLTASG NA  | NA |
| 27 | 33 QRMASLTASG NA  | NA |
| 28 | 54 GRVYDLKTAS NA  | NA |
| 15 | 20 VFVSNLTASG NA  | NA |
| 46 | 36 AKVMSLTASG NA  | NA |
| 35 | 47 ETMLALTASG NA  | NA |
| 41 | 53 GKVEYLVTAS NA  | NA |
| 20 | 25 WQYSNLTASG NA  | NA |
| 37 | 44 GSVNYLVTAS NA  | NA |
| 33 | 44 HSPWFLTASG NA  | NA |
| 9  | 11 ISVNYLTASG NA  | NA |
| 99 | 113 GWAYNMRTAS NA | NA |
| 93 | 84 SGGSGLRVKR NA  | NA |

|    |     |               |    |
|----|-----|---------------|----|
| 20 | 28  | VPWGNLTASG NA | NA |
| 58 | 62  | KWVSMLTASG NA | NA |
| 12 | 11  | SGVYSLIKTA NA | NA |
| 23 | 17  | FSQLAMTASG NA | NA |
| 36 | 38  | SMGSHLTASG NA | NA |
| 96 | 133 | GLAWGLYTAS NA | NA |
| 12 | 18  | NTSAWLTASG NA | NA |
| 34 | 33  | GLPDFLTASG NA | NA |
| 43 | 41  | EIWLPITASG NA | NA |
| 21 | 27  | TVSYALTASG NA | NA |
| 12 | 14  | NRFSNLTASG NA | NA |
| 14 | 26  | AHFAHLTASG NA | NA |
| 27 | 33  | ASTLHLTASG NA | NA |
| 25 | 27  | TKYAYITASG NA | NA |
| 65 | 76  | SGPAYWRRTA NA | NA |
| 13 | 15  | WKVSSLTASG NA | NA |
| 45 | 54  | RTMLHMTASG NA | NA |
| 50 | 38  | GSTRNLITAS NA | NA |
| 44 | 39  | SGPSWLYTTA NA | NA |
| 31 | 41  | YCSLPLTASG NA | NA |
| 49 | 48  | HDYFNLTASG NA | NA |
| 27 | 29  | SPPLALTASG NA | NA |
| 15 | 13  | VSSYWLTASG NA | NA |
| 58 | 63  | GWVSYLKTAS NA | NA |
| 43 | 46  | FDISHLTASG NA | NA |
| 60 | 56  | SGPLGIKSTA NA | NA |
| 27 | 33  | SGYMSLIATA NA | NA |
| 19 | 23  | SGVRYLYGTA NA | NA |
| 32 | 54  | MGMWHLTASG NA | NA |
| 10 | 9   | YDTQHLTASG NA | NA |
| 44 | 68  | MSLGNLTASG NA | NA |
| 45 | 65  | GSPMHLITAS NA | NA |
| 79 | 83  | GLPLNWRTAS NA | NA |
| 44 | 56  | SGHQNLMATA NA | NA |
| 52 | 56  | SGVRFLKGTA NA | NA |
| 41 | 37  | FQFEHLTASG NA | NA |
| 39 | 55  | GWWMNLTASG NA | NA |
| 24 | 21  | KSPLGLTASG NA | NA |
| 33 | 47  | SGFLHWRSTA NA | NA |
| 25 | 22  | YEPRNVTASG NA | NA |
| 36 | 31  | GSGAALTMPT NA | NA |

|    |                   |    |
|----|-------------------|----|
| 5  | 5 VKVFSMTASG NA   | NA |
| 43 | 48 RQLAHITASG NA  | NA |
| 90 | 122 GHARSLKTAS NA | NA |
| 43 | 54 SGPFYLRNTA NA  | NA |
| 35 | 30 GEFAALQTAS NA  | NA |
| 48 | 53 KVMYMLTASG NA  | NA |
| 6  | 14 RAPSMLTASG NA  | NA |
| 19 | 30 GFFLHLTTAS NA  | NA |
| 37 | 34 SGFAHLTSTA NA  | NA |
| 26 | 41 SGYYGLRATA NA  | NA |
| 16 | 15 HGLWSLTASG NA  | NA |
| 26 | 30 GSGWALKKVT NA  | NA |
| 34 | 50 EQLSFLTASG NA  | NA |
| 52 | 62 YKPAGLTASG NA  | NA |
| 21 | 19 GLLLNMTASG NA  | NA |
| 81 | 94 EVARAWTASG NA  | NA |
| 41 | 61 GRGANLKTAS NA  | NA |
| 15 | 24 NTPNWLTASG NA  | NA |
| 53 | 55 TTLRWWTASG NA  | NA |
| 36 | 42 VYWGNMTASG NA  | NA |
| 30 | 41 RNPEWMTASG NA  | NA |
| 95 | 92 NRLSHWTASG NA  | NA |
| 65 | 90 GRASHLMTAS NA  | NA |
| 71 | 73 SGFRNLRITA NA  | NA |
| 45 | 55 HLAYHMTASG NA  | NA |
| 33 | 44 GEPNYLKTAS NA  | NA |
| 46 | 71 HAHASLTASG NA  | NA |
| 36 | 34 SGPVALYKTA NA  | NA |
| 20 | 27 TTHYSLTASG NA  | NA |
| 72 | 82 SIHLALTASG NA  | NA |
| 49 | 59 VLWAGLTASG NA  | NA |
| 13 | 16 VMYGNLTASG NA  | NA |
| 16 | 23 SLVLNMTASG NA  | NA |
| 4  | 7 TSFRMLTASG NA   | NA |
| 28 | 46 YLVRYLTASG NA  | NA |
| 95 | 122 SGYANMRRTA NA | NA |
| 23 | 26 PRVWLLTASG NA  | NA |
| 34 | 37 RDLSHLTASG NA  | NA |
| 90 | 100 SGPSGMRVTA NA | NA |
| 33 | 55 RFALNLTASG NA  | NA |
| 86 | 127 GVLYHLQTAS NA | NA |

|     |                   |    |
|-----|-------------------|----|
| 47  | 46 LSHAWLTASG NA  | NA |
| 47  | 36 NRPASWTASG NA  | NA |
| 5   | 2 VPPEAITASG NA   | NA |
| 48  | 64 GIVKHLQTAS NA  | NA |
| 21  | 32 SGPFFLRKTA NA  | NA |
| 46  | 53 GKCLKHLQTAS NA | NA |
| 26  | 31 GGPSMLTASG NA  | NA |
| 18  | 29 KMPSFLTASG NA  | NA |
| 82  | 94 SGARSMRLTA NA  | NA |
| 41  | 56 GGPIPLWTAS NA  | NA |
| 31  | 41 GDMRHLSTAS NA  | NA |
| 25  | 36 QSWYGMTASG NA  | NA |
| 165 | 159 SGPQSWRTTA NA | NA |
| 20  | 35 RNGLALTASG NA  | NA |
| 36  | 47 SIAFALTASG NA  | NA |
| 1   | 7 QRPAQLTASG NA   | NA |
| 34  | 70 NKVYAWTASG NA  | NA |
| 30  | 46 SGPLGITLTA NA  | NA |
| 36  | 55 GSGQHLRKST NA  | NA |
| 43  | 43 YSATNLTASG NA  | NA |
| 86  | 94 SGRRNLMNTA NA  | NA |
| 53  | 80 SGVFWMRGTA NA  | NA |
| 38  | 31 RPPSSLTASG NA  | NA |
| 49  | 54 GLPYALYTAS NA  | NA |
| 28  | 57 LLYASLTASG NA  | NA |
| 27  | 27 EMYGNMTASG NA  | NA |
| 18  | 22 ISWLNLTASG NA  | NA |
| 23  | 29 ATIAHLTASG NA  | NA |
| 26  | 45 LTPRYWTASG NA  | NA |
| 9   | 19 GNVANLTASG NA  | NA |
| 117 | 164 SGPRPLYHTA NA | NA |
| 40  | 49 RRVLMMTASG NA  | NA |
| 30  | 38 GTPYPLRTAS NA  | NA |
| 31  | 32 ANYSNITASG NA  | NA |
| 45  | 49 GMARFLSTAS NA  | NA |
| 23  | 27 SGPSMLTATA NA  | NA |
| 12  | 13 LLYMGLTASG NA  | NA |
| 30  | 30 SGPNYIRATA NA  | NA |
| 46  | 75 GMAWGLRTAS NA  | NA |
| 7   | 18 IPAFNLTASG NA  | NA |
| 14  | 16 TNPIMLTASG NA  | NA |

|     |                   |    |
|-----|-------------------|----|
| 31  | 41 HIWQNLTASG NA  | NA |
| 26  | 22 RKVRNWTASG NA  | NA |
| 23  | 45 RSHASLTASG NA  | NA |
| 13  | 9 TVLNSLTASG NA   | NA |
| 35  | 19 SQPTGLTASG NA  | NA |
| 22  | 69 HWPVGLTASG NA  | NA |
| 20  | 27 SLPTSLTASG NA  | NA |
| 26  | 32 RLLLNMRTASG NA | NA |
| 78  | 109 GSFRLRTAS NA  | NA |
| 29  | 34 EMSWGLTASG NA  | NA |
| 15  | 19 DSLAWLTASG NA  | NA |
| 105 | 124 LWYGHLTASG NA | NA |
| 35  | 36 AHVFALTASG NA  | NA |
| 29  | 36 PKFSHMTASG NA  | NA |
| 15  | 24 STVFHMTASG NA  | NA |
| 7   | 15 RLYMNITASG NA  | NA |
| 81  | 132 SGARSLKGTA NA | NA |
| 49  | 66 GGPFLKTAS NA   | NA |
| 46  | 61 QHWGGLTASG NA  | NA |
| 43  | 48 RQVRYLTASG NA  | NA |
| 14  | 22 PVFQSLTASG NA  | NA |
| 37  | 38 VRLNYLTASG NA  | NA |
| 125 | 175 GVYRHMRTAS NA | NA |
| 43  | 57 GFPQSLMTAS NA  | NA |
| 65  | 80 GAWHNMRTAS NA  | NA |
| 76  | 85 VNARMLTASG NA  | NA |
| 98  | 108 TKWLALTASG NA | NA |
| 43  | 63 SGPRWMKGTA NA  | NA |
| 28  | 39 ERIYALTASG NA  | NA |
| 22  | 20 SLFLHMTASG NA  | NA |
| 42  | 56 SGWSGMMATA NA  | NA |
| 30  | 40 ENFLHLTASG NA  | NA |
| 9   | 30 AGPQPLTASG NA  | NA |
| 50  | 65 TVPRAWTASG NA  | NA |
| 48  | 61 QVSWAWTASG NA  | NA |
| 74  | 90 SGAQMLRGTA NA  | NA |
| 29  | 38 TSLANLTASG NA  | NA |
| 34  | 52 GEVRGLRTAS NA  | NA |
| 30  | 39 GGYANLTTAS NA  | NA |
| 58  | 73 AFLSHWTASG NA  | NA |
| 62  | 62 GIFWHLRTAS NA  | NA |



|    |                  |    |
|----|------------------|----|
| 13 | 11 TIPFYMTASG NA | NA |
| 26 | 33 RTPVGLTASG NA | NA |
| 23 | 30 GRAAWLQTAS NA | NA |
| 22 | 31 HNANYLTASG NA | NA |
| 21 | 29 IAFSQLTASG NA | NA |
| 46 | 52 EQAWYLTASG NA | NA |
| 59 | 77 GRLASLTASG NA | NA |
| 12 | 7 LVGNSLTASG NA  | NA |
| 30 | 39 VMVWNITASG NA | NA |
| 39 | 43 SGYRSLYSTA NA | NA |
| 25 | 22 GSVWALTASG NA | NA |
| 37 | 49 FSLRQMTASG NA | NA |
| 51 | 62 TMGMNMTASG NA | NA |
| 68 | 79 YNWRHLTASG NA | NA |
| 58 | 71 PMVRWLTASG NA | NA |
| 18 | 28 RGPYMLTASG NA | NA |
| 16 | 38 NMWAHLTASG NA | NA |
| 28 | 48 RYAQPLTASG NA | NA |
| 10 | 18 LPYFSMTASG NA | NA |
| 37 | 60 SGPAWMKGTA NA | NA |
| 51 | 64 TRLAHVTASG NA | NA |
| 69 | 64 GCPLSLYTAS NA | NA |
| 71 | 69 GKLASLRTAS NA | NA |
| 35 | 50 GTVRSLITAS NA | NA |
| 9  | 21 WRYSNLTASG NA | NA |
| 40 | 70 SGYRSLTLTA NA | NA |
| 35 | 46 GSGRHLIKVT NA | NA |
| 50 | 45 VLPRSWTASG NA | NA |
| 40 | 42 GTPSALTAS NA  | NA |
| 49 | 44 FPVLSLTASG NA | NA |
| 30 | 30 GSVMNLTASG NA | NA |
| 43 | 42 RGPYHLTASG NA | NA |
| 28 | 42 RMLAQLTASG NA | NA |
| 50 | 67 GCPHMMTASG NA | NA |
| 36 | 45 GEFRRMRTAS NA | NA |
| 30 | 27 IPLLNLTASG NA | NA |
| 21 | 49 GKMFHLITAS NA | NA |
| 8  | 11 LLFSQLTASG NA | NA |
| 49 | 61 SGASHMTLTA NA | NA |
| 47 | 50 GNVRNLTAS NA  | NA |
| 25 | 36 PQVWYLTASG NA | NA |

|    |     |                |    |
|----|-----|----------------|----|
| 13 | 23  | AVLSNLTASG NA  | NA |
| 37 | 53  | GMPWSVTASG NA  | NA |
| 24 | 26  | SGYASMVATA NA  | NA |
| 36 | 41  | MNWESLTASG NA  | NA |
| 35 | 44  | GLGLNLTASG NA  | NA |
| 17 | 27  | SLPRPLTASG NA  | NA |
| 25 | 28  | TFARSLTASG NA  | NA |
| 55 | 61  | SGLRHLSNTA NA  | NA |
| 34 | 30  | SGVLGLIGTA NA  | NA |
| 37 | 30  | GYPLHLQTAS NA  | NA |
| 44 | 30  | AGVRYLTASG NA  | NA |
| 9  | 19  | PRLTHLTASG NA  | NA |
| 36 | 37  | SRYLPMTASG NA  | NA |
| 36 | 51  | PIALHWTASG NA  | NA |
| 71 | 106 | GSGQHRLRVHT NA | NA |
| 35 | 44  | SGWSNLMRTA NA  | NA |
| 58 | 64  | GSVWHVRTAS NA  | NA |
| 47 | 68  | SGPFHLSRTA NA  | NA |
| 27 | 32  | GMAQYLTASG NA  | NA |
| 44 | 60  | VRVLHLTASG NA  | NA |
| 26 | 34  | VVYRGLTASG NA  | NA |
| 8  | 21  | FSARSLTASG NA  | NA |
| 35 | 45  | AMPLHMTASG NA  | NA |
| 33 | 36  | SIVRMLTASG NA  | NA |
| 39 | 31  | SGVWGIYVTA NA  | NA |
| 27 | 37  | KGPEMLTASG NA  | NA |
| 49 | 78  | ELMLSMTASG NA  | NA |
| 81 | 93  | GLPTALRTAS NA  | NA |
| 58 | 61  | SGLWYLSATA NA  | NA |
| 72 | 80  | IEAWSLTASG NA  | NA |
| 27 | 36  | GKPASLDTAS NA  | NA |
| 63 | 71  | SGSMRLVLTA NA  | NA |
| 64 | 70  | GQQMSLRTAS NA  | NA |
| 15 | 18  | TGVSWLTASG NA  | NA |
| 25 | 38  | RILGYLTASG NA  | NA |
| 14 | 17  | PRVMLLTASG NA  | NA |
| 35 | 53  | GYIQSLFTAS NA  | NA |
| 8  | 16  | GYFGNLRTAS NA  | NA |
| 35 | 51  | GGSGSLVNLL NA  | NA |
| 36 | 42  | SGPVMLRGTA NA  | NA |
| 35 | 66  | SGLGTLSKTA NA  | NA |

|    |    |                |    |
|----|----|----------------|----|
| 47 | 51 | SGISYMRITA NA  | NA |
| 42 | 42 | GRIYELWTAS NA  | NA |
| 48 | 61 | GGSGSLVLRRL NA | NA |
| 16 | 14 | VSLAYLTASG NA  | NA |
| 22 | 20 | GSGASLQMLT NA  | NA |
| 53 | 54 | SQPHLLTASG NA  | NA |
| 77 | 83 | GIAHQLKTAS NA  | NA |
| 11 | 5  | SGISFMSVTA NA  | NA |
| 17 | 26 | GGSGMLKLOP NA  | NA |
| 34 | 45 | GTLAAMSTAS NA  | NA |
| 10 | 18 | PGPESLTASG NA  | NA |
| 31 | 38 | RDVLALTASG NA  | NA |
| 12 | 20 | GISQSLITAS NA  | NA |
| 21 | 18 | TTPSWLTASG NA  | NA |
| 38 | 29 | SGPYTLVMTA NA  | NA |
| 39 | 59 | SGPARLISTA NA  | NA |
| 34 | 38 | GIPFFMTTAS NA  | NA |
| 38 | 44 | SGPMRLVTTA NA  | NA |
| 21 | 35 | GGVSFLLTAS NA  | NA |
| 56 | 75 | SGARQLVLTA NA  | NA |
| 12 | 24 | LQSMNLTASG NA  | NA |
| 32 | 28 | GISFALTAS NA   | NA |
| 38 | 38 | VRAHSLTASG NA  | NA |
| 46 | 60 | GSHSNLMTAS NA  | NA |
| 20 | 31 | GSGYSLIALT NA  | NA |
| 32 | 37 | GNPLPQMTAS NA  | NA |
| 60 | 76 | SGPFRLNWT A NA | NA |
| 64 | 64 | GRVELLYTAS NA  | NA |
| 12 | 10 | RVTWALTASG NA  | NA |
| 32 | 44 | GSGFSLRTWT NA  | NA |
| 27 | 24 | GKVSELITAS NA  | NA |
| 17 | 23 | GVLQKLVTAS NA  | NA |
| 22 | 35 | QKVLNMTASG NA  | NA |
| 40 | 43 | SGPHWLNATA NA  | NA |
| 11 | 17 | SGSWSLILTA NA  | NA |
| 19 | 25 | GGSGALQRLP NA  | NA |
| 13 | 15 | HRPFGLTASG NA  | NA |
| 62 | 78 | GGSGALRVQL NA  | NA |
| 63 | 67 | SGLAKLTVTA NA  | NA |
| 73 | 77 | GGSGALTMPL NA  | NA |
| 28 | 26 | LQPLTITASG NA  | NA |

|    |     |               |    |
|----|-----|---------------|----|
| 34 | 37  | GGLGMMLTAS NA | NA |
| 35 | 34  | GQVPMLTAS NA  | NA |
| 85 | 108 | SGPHSMKLTA NA | NA |
| 48 | 56  | GALDWMSTAS NA | NA |
| 40 | 51  | GVAGALYTAS NA | NA |
| 10 | 27  | RSPLMMTASG NA | NA |
| 24 | 30  | TKVLWLTASG NA | NA |
| 36 | 40  | GKVHQMLTAS NA | NA |
| 68 | 65  | GRVHRLSTAS NA | NA |
| 16 | 27  | FMMGNMTASG NA | NA |
| 26 | 39  | SGLGMLATTA NA | NA |
| 26 | 28  | ISPMLLTASG NA | NA |
| 15 | 23  | ERPGWLTASG NA | NA |
| 62 | 78  | HYPSSLTASG NA | NA |
| 13 | 18  | SGFSELTLTA NA | NA |
| 40 | 48  | WHFGALTASG NA | NA |
| 55 | 58  | GRIALLTTAS NA | NA |
| 64 | 87  | GGSGELRLSN NA | NA |
| 28 | 32  | SGIESMYVTA NA | NA |
| 45 | 54  | GSAHLLLTAS NA | NA |
| 36 | 57  | GGSGRLLQFL NA | NA |
| 40 | 48  | SGPKQLTRTA NA | NA |
| 65 | 57  | SGPHLLIRTA NA | NA |
| 41 | 58  | SGVRALISTA NA | NA |
| 50 | 59  | GRPLQYRTAS NA | NA |
| 40 | 48  | SGPLASTVTA NA | NA |
| 34 | 41  | GVPLNVKTAS NA | NA |
| 31 | 30  | SGVAPLILTA NA | NA |
| 49 | 50  | SGINMLTLTA NA | NA |
| 50 | 74  | GVVHSFCTAS NA | NA |
| 31 | 26  | GKASNLYTAS NA | NA |
| 23 | 30  | AGLDLLTASG NA | NA |
| 60 | 69  | GRLGCLKTAS NA | NA |
| 29 | 45  | GGSGSLRLFEN A | NA |
| 50 | 56  | GGASGLMTAS NA | NA |
| 19 | 21  | ISPATLTASG NA | NA |
| 15 | 24  | GGSGPLMLPF NA | NA |
| 33 | 37  | GGSGFLMSWM NA | NA |
| 18 | 31  | SGSFNLTMTA NA | NA |
| 37 | 23  | SGIWKLTATA NA | NA |
| 62 | 71  | GSGNRLMRLT NA | NA |

|     |                   |    |
|-----|-------------------|----|
| 45  | 57 RHLAKLTASG NA  | NA |
| 37  | 53 SGLGELRGTA NA  | NA |
| 30  | 35 GHPWLQRTAS NA  | NA |
| 52  | 62 SGPSNMLRTA NA  | NA |
| 44  | 44 SGPLSQSTTA NA  | NA |
| 26  | 28 WSVQLLTASG NA  | NA |
| 34  | 28 GYYGELLTAS NA  | NA |
| 31  | 34 EKVMLMTASG NA  | NA |
| 31  | 59 GHLASQRTAS NA  | NA |
| 31  | 29 GGS GALQVPT NA | NA |
| 51  | 56 MVPHMLTASG NA  | NA |
| 80  | 82 GGS GRLVLRV NA | NA |
| 30  | 47 SGPSDLHATA NA  | NA |
| 19  | 23 IMMAYLTASG NA  | NA |
| 60  | 59 SGAQALTLTA NA  | NA |
| 40  | 42 GVLGHLSTAS NA  | NA |
| 45  | 48 GRAQNLLTAS NA  | NA |
| 35  | 39 GSGLLELRVNT NA | NA |
| 17  | 20 GTIFRLTASG NA  | NA |
| 52  | 62 SGLLNMYITA NA  | NA |
| 43  | 52 GTMMSLMTAS NA  | NA |
| 126 | 176 SGLASLRLTA NA | NA |
| 22  | 26 QRMDLLTASG NA  | NA |
| 50  | 57 QHLAALTASG NA  | NA |
| 61  | 95 GSGMRLVLRV NA  | NA |
| 25  | 31 SGIQTMKVTA NA  | NA |
| 35  | 26 TALGYLTASG NA  | NA |
| 60  | 64 PVVWWQTASG NA  | NA |
| 62  | 72 SGVNSLRRTA NA  | NA |
| 44  | 50 GNAMRMVTAS NA  | NA |
| 82  | 94 HLPTALTASG NA  | NA |
| 63  | 72 GSALALTTAS NA  | NA |
| 30  | 42 GGS GNLIYWN NA | NA |
| 50  | 62 SGAMNLTLTA NA  | NA |
| 38  | 36 GTVWALTTAS NA  | NA |
| 102 | 138 SGAVALRLTA NA | NA |
| 18  | 22 SGANSLVATA NA  | NA |
| 42  | 41 GGS GMLLMKQ NA | NA |
| 26  | 24 SGTWPLSGTA NA  | NA |
| 11  | 22 SGVNLLLMTA NA  | NA |
| 10  | 18 VTVIALTASG NA  | NA |

|    |     |                |    |
|----|-----|----------------|----|
| 26 | 50  | SGLWTLMATA NA  | NA |
| 23 | 38  | GSPVQLTTAS NA  | NA |
| 51 | 62  | GTIAYLNTAS NA  | NA |
| 29 | 32  | GTPLGQITAS NA  | NA |
| 65 | 54  | GQHMLITAS NA   | NA |
| 8  | 12  | ATASFLTASG NA  | NA |
| 22 | 24  | SGVFNLAFITA NA | NA |
| 70 | 89  | GVPSWLSTAS NA  | NA |
| 9  | 24  | RVLSRLTASG NA  | NA |
| 46 | 55  | GGSGFLVRSL NA  | NA |
| 20 | 44  | VSISFLTASG NA  | NA |
| 38 | 39  | GGSGALIAND NA  | NA |
| 48 | 40  | MKPVNLTASG NA  | NA |
| 39 | 48  | GFAISMVTAS NA  | NA |
| 51 | 52  | GIAMNILTAS NA  | NA |
| 54 | 70  | SGMSSLKFTA NA  | NA |
| 54 | 53  | GTLLEDLITAS NA | NA |
| 22 | 21  | GGSGQLLLRN NA  | NA |
| 60 | 71  | SGLYGLTLTA NA  | NA |
| 63 | 73  | GSGFQLRVFT NA  | NA |
| 51 | 58  | RDLWKLTASG NA  | NA |
| 29 | 37  | GRASALNTAS NA  | NA |
| 70 | 102 | GTIAHLHTAS NA  | NA |
| 15 | 18  | TPVGWMTASG NA  | NA |
| 34 | 36  | HVLQNLITASG NA | NA |
| 26 | 23  | EPIYNLTASG NA  | NA |
| 32 | 31  | GVLMLNLTAS NA  | NA |
| 39 | 46  | AVTYALTASG NA  | NA |
| 34 | 48  | GVLHSLRTAS NA  | NA |
| 31 | 40  | KAALPLTASG NA  | NA |
| 1  | 2   | TSVLALTASG NA  | NA |
| 42 | 36  | GAPSSLRTAS NA  | NA |
| 14 | 16  | SGPAPLVLTA NA  | NA |
| 34 | 50  | GVMMLVTAS NA   | NA |
| 14 | 25  | RPAQDLTASG NA  | NA |
| 24 | 22  | SGPLTLNSTA NA  | NA |
| 27 | 33  | NRIGNFTASG NA  | NA |
| 16 | 17  | GPVMMSTAS NA   | NA |
| 15 | 20  | SGLQNLMLTA NA  | NA |
| 18 | 29  | QSPVQLTASG NA  | NA |
| 38 | 45  | FTPLNMTASG NA  | NA |

|    |     |                |    |
|----|-----|----------------|----|
| 65 | 53  | SGMLSLVITA NA  | NA |
| 21 | 38  | GKVNNLVTAS NA  | NA |
| 39 | 27  | VRTMALTASG NA  | NA |
| 20 | 21  | TAPINLTASG NA  | NA |
| 27 | 25  | APVYALTASG NA  | NA |
| 25 | 30  | GTIDLLTTAS NA  | NA |
| 43 | 42  | GVAKPLWTAS NA  | NA |
| 75 | 81  | GWMHELKTAS NA  | NA |
| 17 | 36  | SYMFSLTASG NA  | NA |
| 45 | 62  | GGSGRLVVRL NA  | NA |
| 40 | 51  | GQVFRLITAS NA  | NA |
| 26 | 44  | GISMYLTASG NA  | NA |
| 90 | 106 | GGSGRLNMRL NA  | NA |
| 17 | 15  | FAAYSLTASG NA  | NA |
| 23 | 33  | RGMQNLTTASG NA | NA |
| 30 | 35  | GPMQRLMTAS NA  | NA |
| 37 | 34  | GSGAKLIVRT NA  | NA |
| 56 | 63  | IVNARLTASG NA  | NA |
| 11 | 15  | YAPGSMTASG NA  | NA |
| 59 | 82  | SGYAGLRQTA NA  | NA |
| 60 | 78  | SGAYSLRVTA NA  | NA |
| 29 | 26  | RNLASLTASG NA  | NA |
| 37 | 37  | GSGNFLRKMT NA  | NA |
| 10 | 14  | EQLANMTASG NA  | NA |
| 21 | 26  | SGALALLDTA NA  | NA |
| 8  | 14  | ELPNFLTASG NA  | NA |
| 44 | 38  | GVLFHLSTAS NA  | NA |
| 47 | 66  | SWGLALTASG NA  | NA |
| 46 | 43  | MVPSALTASG NA  | NA |
| 42 | 46  | MFHLNITASG NA  | NA |
| 7  | 13  | RKALNLTASG NA  | NA |
| 36 | 41  | SGPWGLLETA NA  | NA |
| 24 | 39  | VDHAHLTASG NA  | NA |
| 29 | 20  | PGIANLTASG NA  | NA |
| 35 | 43  | TLTHHLTASG NA  | NA |
| 30 | 41  | EVSQHILTASG NA | NA |
| 68 | 71  | GCLMALTTAS NA  | NA |
| 78 | 118 | SGGSGLRMWI NA  | NA |
| 47 | 71  | RRPASMTASG NA  | NA |
| 29 | 37  | DILRHLTASG NA  | NA |
| 12 | 22  | TMAHPLTASG NA  | NA |

|     |     |               |    |
|-----|-----|---------------|----|
| 72  | 103 | SGPMSLRMTA NA | NA |
| 30  | 13  | SKVLFLTASG NA | NA |
| 44  | 48  | SGAYHLQOTA NA | NA |
| 38  | 35  | CCAMGLTASG NA | NA |
| 54  | 59  | SGVLSLRYTA NA | NA |
| 54  | 79  | GQPFALSTAS NA | NA |
| 21  | 42  | SMPRMLTASG NA | NA |
| 47  | 58  | PGVRFLTASG NA | NA |
| 39  | 37  | PDVFALTASG NA | NA |
| 41  | 53  | SAVRALTASG NA | NA |
| 32  | 56  | RTYSHLTASG NA | NA |
| 76  | 61  | HLVAWLTASG NA | NA |
| 67  | 74  | SGPLGIFYTA NA | NA |
| 31  | 20  | VVAVSLTASG NA | NA |
| 38  | 38  | SGARNLMATA NA | NA |
| 138 | 139 | SGVRMLRRTA NA | NA |
| 23  | 13  | SLYRALTASG NA | NA |
| 11  | 18  | GKTWALTASG NA | NA |
| 33  | 79  | GRALAMQTAS NA | NA |
| 22  | 17  | VPPMPLTASG NA | NA |
| 30  | 18  | SSPLYLTASG NA | NA |
| 75  | 120 | GQAWALGTAS NA | NA |
| 33  | 22  | SVARNLTASG NA | NA |
| 28  | 33  | LVVAALTASG NA | NA |
| 15  | 15  | RTPLMLTASG NA | NA |
| 83  | 91  | SGVWGIRYTA NA | NA |
| 62  | 78  | SGYMHKIVTA NA | NA |
| 41  | 65  | RYPWALTASG NA | NA |
| 27  | 29  | ELYASLTASG NA | NA |
| 36  | 60  | VHVHALTASG NA | NA |
| 51  | 49  | SGIYGLRNTA NA | NA |
| 34  | 30  | YQTMALTASG NA | NA |
| 36  | 45  | SGPLAVRTTA NA | NA |
| 23  | 28  | MAYQSLTASG NA | NA |
| 29  | 44  | ESAQMITASG NA | NA |
| 51  | 49  | FIARALTASG NA | NA |
| 21  | 25  | VFALNLTASG NA | NA |
| 27  | 19  | RVIRHLTASG NA | NA |
| 19  | 32  | YFARQLTASG NA | NA |
| 45  | 45  | GSPVWLRTAS NA | NA |
| 18  | 23  | EHNLPLTASG NA | NA |



|     |     |                |    |
|-----|-----|----------------|----|
| 34  | 44  | NFGRPLTASG NA  | NA |
| 43  | 45  | SGPIPIRKTA NA  | NA |
| 30  | 16  | LPTRWLTASG NA  | NA |
| 33  | 38  | WVANMITASG NA  | NA |
| 58  | 67  | DRIRHLTASG NA  | NA |
| 55  | 68  | WLAQALTASG NA  | NA |
| 38  | 64  | SGPSSLLGTA NA  | NA |
| 59  | 56  | GLPQALLTAS NA  | NA |
| 63  | 65  | FHIAHLTASG NA  | NA |
| 85  | 89  | SGPLSLRSTA NA  | NA |
| 39  | 53  | SGAFSLMRTA NA  | NA |
| 77  | 86  | DVAFHLTASG NA  | NA |
| 38  | 45  | AIYRSMTASG NA  | NA |
| 39  | 57  | GLAVGLRTAS NA  | NA |
| 36  | 45  | YRVAFLTASG NA  | NA |
| 44  | 41  | VIVAALTASG NA  | NA |
| 37  | 43  | SGALGLLETA NA  | NA |
| 46  | 40  | GVGHNLRTAS NA  | NA |
| 25  | 50  | IEYLNYSASG NA  | NA |
| 187 | 228 | SGWASMRLTA NA  | NA |
| 27  | 27  | QAAFHLTASG NA  | NA |
| 22  | 39  | SGAWNMRVTA NA  | NA |
| 74  | 109 | GYGLHLRTAS NA  | NA |
| 104 | 133 | HHPAALTASG NA  | NA |
| 53  | 62  | SGNLALKQTA NA  | NA |
| 53  | 58  | TVLRSLTASG NA  | NA |
| 36  | 46  | RYPVNMSTASG NA | NA |
| 61  | 59  | GRPMNLRTAS NA  | NA |
| 23  | 40  | NRPSALTASG NA  | NA |
| 37  | 40  | GMVLNLTASG NA  | NA |
| 42  | 37  | SIPNALTASG NA  | NA |
| 81  | 105 | GQVRALRTAS NA  | NA |
| 31  | 31  | SGYLPLLYTA NA  | NA |
| 47  | 59  | SGPLSILNTA NA  | NA |
| 34  | 26  | IFINFLTASG NA  | NA |
| 31  | 49  | VHAVWLTASG NA  | NA |
| 50  | 61  | NKTAWLTASG NA  | NA |
| 24  | 18  | PSPRAITASG NA  | NA |
| 98  | 117 | VWGRALTASG NA  | NA |
| 50  | 86  | GMYLNLKTAS NA  | NA |
| 35  | 30  | RDVLWLTASG NA  | NA |

|    |     |               |    |
|----|-----|---------------|----|
| 79 | 99  | GTVRHLSTAS NA | NA |
| 44 | 64  | SGPMHLRSTA NA | NA |
| 28 | 32  | VTPLYLTASG NA | NA |
| 61 | 72  | GSPLSWRTAS NA | NA |
| 9  | 14  | STVRNLTASG NA | NA |
| 34 | 37  | RRTAWLTASG NA | NA |
| 55 | 63  | GRVAHLRTAS NA | NA |
| 33 | 36  | VDILHLTASG NA | NA |
| 29 | 42  | RVPRGLTASG NA | NA |
| 30 | 28  | VQLRSLTASG NA | NA |
| 78 | 120 | SGYAHMRVTA NA | NA |
| 54 | 82  | GRPHPLSTAS NA | NA |
| 13 | 18  | GKPLPWTASG NA | NA |
| 12 | 19  | QVPVFLTASG NA | NA |
| 16 | 19  | LPALNMTASG NA | NA |
| 97 | 117 | GSGQGLKVRT NA | NA |
| 27 | 36  | IGYAWMTASG NA | NA |
| 64 | 65  | GRVWHLQTAS NA | NA |
| 33 | 60  | SGPYNLRGTA NA | NA |
| 46 | 58  | IQLAWLTASG NA | NA |
| 32 | 40  | SSYAHLTASG NA | NA |
| 65 | 64  | VFYQSLTASG NA | NA |
| 56 | 53  | SGALHLRETA NA | NA |
| 71 | 83  | SGPMGMRNTA NA | NA |
| 24 | 37  | GVPQWIHTAS NA | NA |
| 24 | 21  | PMARYLTASG NA | NA |
| 24 | 16  | NFPMSLTASG NA | NA |
| 23 | 26  | QKYSNLTASG NA | NA |
| 38 | 49  | TRPQHLTASG NA | NA |
| 60 | 55  | SGAFHILGTA NA | NA |
| 31 | 30  | SGYRFMTLTA NA | NA |
| 33 | 36  | HGPMSLTASG NA | NA |
| 27 | 55  | GSGAWLKKIT NA | NA |
| 8  | 12  | QRANSITASG NA | NA |
| 19 | 36  | KRAASLTASG NA | NA |
| 26 | 32  | ANAMNLTASG NA | NA |
| 83 | 116 | GRHQSLRTAS NA | NA |
| 26 | 39  | YLPRAITASG NA | NA |
| 22 | 31  | YATWSMTASG NA | NA |
| 37 | 51  | GKVRNLTAS NA  | NA |
| 17 | 22  | SRVRNLTASG NA | NA |

|     |     |                |    |
|-----|-----|----------------|----|
| 51  | 77  | GRVLHLRTAS NA  | NA |
| 12  | 13  | SDIRWLTASG NA  | NA |
| 22  | 37  | EVTMWLTASG NA  | NA |
| 62  | 47  | SGPAGMHSTA NA  | NA |
| 24  | 34  | GAPAFLLKTAS NA | NA |
| 86  | 147 | GSGQGLRMGT NA  | NA |
| 23  | 31  | VKAQHLTASG NA  | NA |
| 45  | 40  | HWPRFLTASG NA  | NA |
| 55  | 52  | SGVASLMGTA NA  | NA |
| 28  | 41  | SKIRFLTASG NA  | NA |
| 49  | 72  | TAVRSLTASG NA  | NA |
| 48  | 66  | SGVRFMRQTA NA  | NA |
| 29  | 40  | GLAYSLQTAS NA  | NA |
| 22  | 27  | RGPVFLTASG NA  | NA |
| 30  | 27  | HLFQWLTASG NA  | NA |
| 64  | 80  | CCSLALTASG NA  | NA |
| 46  | 63  | SGPMALKSTA NA  | NA |
| 147 | 148 | GSGLALKMGT NA  | NA |
| 61  | 51  | KMPRWITASG NA  | NA |
| 20  | 38  | VNVRNLTASG NA  | NA |
| 24  | 27  | DYARAMTASG NA  | NA |
| 50  | 66  | MVVRHLTASG NA  | NA |
| 25  | 38  | KSPRMLTASG NA  | NA |
| 23  | 28  | ARAQHITASG NA  | NA |
| 53  | 59  | LGWSSLTASG NA  | NA |
| 23  | 23  | NTFLHLTASG NA  | NA |
| 31  | 39  | SLPAHITASG NA  | NA |
| 41  | 57  | PYAENLTASG NA  | NA |
| 74  | 58  | WLYAHYTASG NA  | NA |
| 66  | 95  | GGHQWLRTAS NA  | NA |
| 41  | 46  | ERLLHLTASG NA  | NA |
| 29  | 51  | VMHQNLTASG NA  | NA |
| 25  | 28  | SRPLNLTASG NA  | NA |
| 20  | 52  | MDLLSLTASG NA  | NA |
| 25  | 19  | SGPAALQSTA NA  | NA |
| 56  | 74  | CLLASLTASG NA  | NA |
| 12  | 14  | SGVFSLLKLT NA  | NA |
| 37  | 27  | TTALWLTASG NA  | NA |
| 20  | 27  | AMAHSLTASG NA  | NA |
| 28  | 33  | SGPMSLLDTA NA  | NA |
| 61  | 54  | GFHRSIRTAS NA  | NA |

|     |     |               |    |
|-----|-----|---------------|----|
| 31  | 31  | NDLAHITASG NA | NA |
| 17  | 46  | KVLASLTASG NA | NA |
| 28  | 27  | TLPHSLTASG NA | NA |
| 55  | 76  | YTMLHLTASG NA | NA |
| 50  | 57  | GDVRHIFTAS NA | NA |
| 27  | 16  | SRVLPLTASG NA | NA |
| 83  | 91  | FMYSHLTASG NA | NA |
| 82  | 112 | SGWLNLRSTA NA | NA |
| 44  | 57  | GQPRNLSTAS NA | NA |
| 132 | 191 | GHAHHLYTAS NA | NA |
| 19  | 21  | DAPYFLTASG NA | NA |
| 34  | 33  | SGGRNLTATA NA | NA |
| 128 | 147 | SGMHMRSTA NA  | NA |
| 35  | 41  | SRPRMLTASG NA | NA |
| 27  | 30  | YNVNYLTASG NA | NA |
| 40  | 57  | SGPVSLRMTA NA | NA |
| 9   | 23  | ERIWALTASG NA | NA |
| 42  | 37  | SGARGIKLTA NA | NA |
| 37  | 25  | GKFATLVTAS NA | NA |
| 30  | 30  | SGVKFLFNTA NA | NA |
| 92  | 105 | GGSGRLTLKW NA | NA |
| 29  | 45  | RHMLGLTASG NA | NA |
| 20  | 48  | VEAHALTASG NA | NA |
| 75  | 99  | ELAWHLTASG NA | NA |
| 21  | 36  | VKVGWLTASG NA | NA |
| 54  | 65  | GGSGALTSRF NA | NA |
| 41  | 39  | GNADLIMTAS NA | NA |
| 25  | 43  | GGSGAYTMVA NA | NA |
| 42  | 55  | GSGMALTHIT NA | NA |
| 97  | 119 | GEVWRLHTAS NA | NA |
| 56  | 51  | GEAWHLFTAS NA | NA |
| 78  | 93  | GAAWGLNTAS NA | NA |
| 73  | 108 | SGVHRLSYTA NA | NA |
| 73  | 94  | GWVGHLSTAS NA | NA |
| 31  | 55  | SGSARLTLTA NA | NA |
| 13  | 27  | GGSGNLTFLA NA | NA |
| 41  | 41  | GGSGALHRPG NA | NA |
| 51  | 53  | SGAGRLRATA NA | NA |
| 8   | 12  | KSPAYLTASG NA | NA |
| 35  | 29  | TGSWPLTASG NA | NA |
| 53  | 53  | SGSYPLTRTA NA | NA |

|    |                   |    |
|----|-------------------|----|
| 12 | 24 SPAHGLTASG NA  | NA |
| 21 | 35 TRMALLTASG NA  | NA |
| 99 | 101 GGSGALREKV NA | NA |
| 49 | 53 SGVMKLQKTA NA  | NA |
| 65 | 102 SGALDLKRTA NA | NA |
| 47 | 47 KWPERLTASG NA  | NA |
| 15 | 13 QRVLPLTASG NA  | NA |
| 48 | 47 GKPNRLVTAS NA  | NA |
| 9  | 17 RNVNFLTASG NA  | NA |
| 59 | 67 GQPAHLSTAS NA  | NA |
| 17 | 26 TMPYLLTASG NA  | NA |
| 43 | 67 GWGDRLTTAS NA  | NA |
| 20 | 23 EAVGNLTASG NA  | NA |
| 40 | 54 SGVGALNKTA NA  | NA |
| 52 | 63 GFAKHLLTAS NA  | NA |
| 42 | 52 YYASHLTASG NA  | NA |
| 33 | 29 GSGSDLKSKT NA  | NA |
| 18 | 24 GGSGQLLATK NA  | NA |
| 34 | 38 GGSGNLVRVR NA  | NA |
| 28 | 41 SGVNSLFTTA NA  | NA |
| 13 | 21 ESPSFLTASG NA  | NA |
| 60 | 72 GGSGRLKWNL NA  | NA |
| 65 | 74 RRVLALTASG NA  | NA |
| 16 | 25 FRVEPLTASG NA  | NA |
| 60 | 67 YSALPMTASG NA  | NA |
| 41 | 67 GGSGRLVMTY NA  | NA |
| 26 | 37 GVSARLVTAS NA  | NA |
| 30 | 39 GSPLDLKTAS NA  | NA |
| 41 | 52 GPAGHLSTAS NA  | NA |
| 50 | 58 ARVGVLTASG NA  | NA |
| 26 | 35 PSPRYLTASG NA  | NA |
| 16 | 23 VSVDQLTASG NA  | NA |
| 4  | 11 SPALDMTASG NA  | NA |
| 53 | 78 GGSGRLMYER NA  | NA |
| 17 | 21 SGVMYLQVTA NA  | NA |
| 24 | 32 VAISRLTASG NA  | NA |
| 34 | 38 GSGWDLKRST NA  | NA |
| 39 | 52 GRAWGLITAS NA  | NA |
| 47 | 56 GGSGQLRREY NA  | NA |
| 74 | 91 SGLARLSMTA NA  | NA |
| 19 | 21 GAPDQLSTAS NA  | NA |

|    |     |                |    |
|----|-----|----------------|----|
| 39 | 36  | SGVGMLYNTA NA  | NA |
| 58 | 52  | SGANYIRATA NA  | NA |
| 23 | 18  | GGSGFLVAKA NA  | NA |
| 40 | 27  | YFPLDMTASG NA  | NA |
| 27 | 32  | GTPSKLYTAS NA  | NA |
| 30 | 35  | GVPFMILTAS NA  | NA |
| 26 | 39  | GSGFALVAKT NA  | NA |
| 37 | 48  | GRAWMMVTAS NA  | NA |
| 15 | 22  | RRPLRITASG NA  | NA |
| 72 | 98  | DLPHCLTASG NA  | NA |
| 20 | 22  | FTVHMLTASG NA  | NA |
| 10 | 14  | NSHMALTASG NA  | NA |
| 36 | 44  | SGVNRISLTA NA  | NA |
| 40 | 38  | SGPSRILMTA NA  | NA |
| 27 | 52  | SGVYRLELTA NA  | NA |
| 24 | 24  | GGSGSLTFNT NA  | NA |
| 40 | 77  | GSGWRLTVGT NA  | NA |
| 29 | 41  | VYSAYLTASG NA  | NA |
| 38 | 45  | GGSGQLFNVG NA  | NA |
| 29 | 29  | SGPQAVVKTA NA  | NA |
| 10 | 23  | GQPNFLTASG NA  | NA |
| 24 | 34  | GTLAQISTAS NA  | NA |
| 27 | 33  | RWPAWLTASG NA  | NA |
| 64 | 77  | GKPQNLRTAS NA  | NA |
| 12 | 23  | PTLWRITASG NA  | NA |
| 30 | 36  | GGSGSLSVWK NA  | NA |
| 56 | 61  | TWAKMLTASG NA  | NA |
| 12 | 17  | KAPLKLITASG NA | NA |
| 38 | 43  | GPAQDLYTAS NA  | NA |
| 71 | 82  | GVINQLRTAS NA  | NA |
| 17 | 24  | SGVMRLVVTA NA  | NA |
| 7  | 16  | NSPQLLTASG NA  | NA |
| 44 | 71  | SGPRSLSQTA NA  | NA |
| 66 | 72  | GSGNSLKRRT NA  | NA |
| 32 | 43  | YKAFTMTASG NA  | NA |
| 47 | 41  | SGVWPLVKTA NA  | NA |
| 20 | 29  | YSPSLITASG NA  | NA |
| 89 | 135 | GGSGPLRARL NA  | NA |
| 18 | 17  | TTSASLTASG NA  | NA |
| 34 | 37  | WNSLNLITASG NA | NA |
| 53 | 61  | GRASRLVTAS NA  | NA |

|     |     |                |    |
|-----|-----|----------------|----|
| 60  | 91  | GGSGSLNQRL NA  | NA |
| 16  | 21  | KPVSALTASG NA  | NA |
| 38  | 52  | GSGHRLMMGT NA  | NA |
| 36  | 52  | GGSGPLHQTK NA  | NA |
| 25  | 34  | RAGFQLTASG NA  | NA |
| 21  | 21  | TVSLPLTASG NA  | NA |
| 113 | 136 | GGSGRLRLAI NA  | NA |
| 30  | 30  | SGTWRLMLTA NA  | NA |
| 79  | 83  | TTSLRLTASG NA  | NA |
| 15  | 15  | RVPKLLTASG NA  | NA |
| 59  | 49  | GCAQELTTAS NA  | NA |
| 41  | 46  | GEIASLSTAS NA  | NA |
| 18  | 26  | RGVWKL TASG NA | NA |
| 43  | 69  | YKPVYYRDGG NA  | NA |
| 87  | 103 | YKPVYYTMTK NA  | NA |
| 47  | 70  | YKPVYYIQVK NA  | NA |
| 63  | 91  | YKPVYYYYIT NA  | NA |
| 55  | 74  | YKPVYYMSVW NA  | NA |
| 51  | 57  | YKPVYYMVQY NA  | NA |
| 69  | 67  | YKPVYYRER NA   | NA |
| 80  | 87  | YKPVYYTLST NA  | NA |
| 37  | 58  | YKPVYYKNPY NA  | NA |
| 174 | 208 | KYHAWMIGAQ NA  | NA |
| 44  | 60  | RIISWMRHSI NA  | NA |
| 23  | 30  | CYISWMRHVR NA  | NA |
| 80  | 100 | TKISWMRHGT NA  | NA |
| 116 | 129 | RSISWMRHLS NA  | NA |
| 57  | 82  | SPISWMRHWG NA  | NA |
| 72  | 78  | MSISWMRHPW NA  | NA |
| 28  | 46  | YAISWMRHVL NA  | NA |
| 88  | 142 | SYISWMRHQH NA  | NA |
| 78  | 83  | PTISWMRHQQ NA  | NA |
| 40  | 59  | VLFGALSVIA NA  | NA |
| 32  | 23  | VLFGALSSGY NA  | NA |
| 72  | 85  | VLFGALFRQK NA  | NA |
| 33  | 27  | VLFGALIRWF NA  | NA |
| 33  | 49  | TSPGLLIGEW NA  | NA |
| 37  | 44  | TSPGLLRLAG NA  | NA |
| 39  | 39  | TSPGLLKMGA NA  | NA |
| 26  | 33  | TSPGLLYQMS NA  | NA |
| 12  | 22  | VFPQGMVQMQ NA  | NA |

|     |                   |    |
|-----|-------------------|----|
| 59  | 55 EHPGLLKRKG NA  | NA |
| 33  | 34 EHPGLLYDQS NA  | NA |
| 31  | 34 EHPGLLSVKT NA  | NA |
| 35  | 38 PSLAELIDGG NA  | NA |
| 41  | 45 PSLAELWLGH NA  | NA |
| 62  | 68 PSLAELIYAL NA  | NA |
| 41  | 51 PSLAELYATT NA  | NA |
| 40  | 36 PSLAELMGIT NA  | NA |
| 80  | 77 PSLAELYAWV NA  | NA |
| 66  | 81 PSLAELRSHA NA  | NA |
| 15  | 18 ATLAAWFSLR NA  | NA |
| 25  | 33 ATLAAWVGWL NA  | NA |
| 23  | 18 ATLAAWAKVF NA  | NA |
| 52  | 53 ATLAAWVMV NA   | NA |
| 17  | 19 ATLAAWSDKR NA  | NA |
| 27  | 46 ATLAAWIKGT NA  | NA |
| 44  | 43 ATLAAWVRQG NA  | NA |
| 21  | 21 ATLAAWLQTV NA  | NA |
| 69  | 73 SRPVYLAVHG NA  | NA |
| 35  | 50 SRPVYLMQLA NA  | NA |
| 35  | 43 SRPVYLLYKS NA  | NA |
| 34  | 46 SRPVYLISRQ NA  | NA |
| 34  | 37 SRPVYLLSNF NA  | NA |
| 34  | 34 SRPVYLAMNY NA  | NA |
| 69  | 62 SRPVYLTGRQ NA  | NA |
| 79  | 100 VWIATLRSHG NA | NA |
| 281 | 326 EWIATLRRSW NA | NA |
| 74  | 90 TWIATLRAAH NA  | NA |
| 90  | 126 GWIATLRGAL NA | NA |
| 74  | 94 WWIATLRLPK NA  | NA |
| 60  | 75 LWIATLRNHF NA  | NA |
| 64  | 102 SWIATLRGPI NA | NA |
| 51  | 78 DWIATLRMMV NA  | NA |
| 57  | 61 PWIATLRDQG NA  | NA |
| 56  | 58 YWIATLRKAG NA  | NA |
| 32  | 44 DWIATLRASA NA  | NA |
| 38  | 49 PSLGQLKLNK NA  | NA |
| 25  | 25 PSLGQLKDKG NA  | NA |
| 39  | 43 PSLGQLRDIK NA  | NA |
| 58  | 63 PSLGQLKNGI NA  | NA |
| 17  | 30 LAPRYWLLGK NA  | NA |



|     |     |                |    |
|-----|-----|----------------|----|
| 21  | 21  | LAPRYWILQR NA  | NA |
| 41  | 43  | LAPRYWFKKK NA  | NA |
| 54  | 66  | ESPVSMRYLV NA  | NA |
| 95  | 127 | YTPVSMRYGH NA  | NA |
| 11  | 15  | MRPVSMRYIQ NA  | NA |
| 80  | 95  | QTPVSMRYWV NA  | NA |
| 63  | 93  | CYPVSMRYMT NA  | NA |
| 38  | 43  | DRPVSMRYST NA  | NA |
| 106 | 112 | YSPVSMRYIW NA  | NA |
| 17  | 27  | TAPVSMRYVI NA  | NA |
| 81  | 65  | HPPVSMRYGH NA  | NA |
| 79  | 75  | MMPVSMRYLR NA  | NA |
| 67  | 102 | GGIAAMRRNA NA  | NA |
| 155 | 175 | MGIAAMRYEH NA  | NA |
| 37  | 46  | LGIAAMRAQG NA  | NA |
| 35  | 44  | GGIAAMRGTS NA  | NA |
| 42  | 62  | IGIAAMRGGQ NA  | NA |
| 76  | 65  | IGIAAMRSKW NA  | NA |
| 48  | 56  | HGIAAMRGNV NA  | NA |
| 13  | 30  | YGIAAMRMRV NA  | NA |
| 27  | 44  | TGIAAMRGGGA NA | NA |
| 592 | 771 | PGIAAMRRRW NA  | NA |
| 117 | 103 | HVVAKMIRHW NA  | NA |
| 55  | 74  | HVVAKMSANK NA  | NA |
| 13  | 19  | FAPAEVYKKL NA  | NA |
| 10  | 22  | FAPAEVLGGK NA  | NA |
| 2   | 10  | FAPAEVSQNI NA  | NA |
| 13  | 15  | FAPAEVMMIV NA  | NA |
| 6   | 12  | FAPAEVMNSI NA  | NA |
| 14  | 16  | FAPAEVKGMW NA  | NA |
| 26  | 30  | GVPRAVKYTG NA  | NA |
| 35  | 38  | GVPRAVKNWT NA  | NA |
| 28  | 23  | GVPRAVKAGG NA  | NA |
| 61  | 88  | SYPRAYKRLV NA  | NA |
| 45  | 51  | VLLGNFADQV NA  | NA |
| 73  | 89  | VLLGNFRSIL NA  | NA |
| 39  | 55  | VLLGNFYQTS NA  | NA |
| 62  | 88  | VLLGNFASKY NA  | NA |
| 52  | 62  | VLLGNFKGLA NA  | NA |
| 58  | 67  | VLLGNFLSQL NA  | NA |
| 63  | 86  | VLLGNFLAGQ NA  | NA |

|    |                  |    |
|----|------------------|----|
| 50 | 48 SVPSAIAGKL NA | NA |
| 29 | 21 SVPSAIKVIF NA | NA |
| 20 | 41 SVPSAIIVII NA | NA |
| 16 | 28 SVPSAIVQKS NA | NA |
| 57 | 65 SVPSAIFGVQ NA | NA |
| 25 | 19 SVPSAIKVIC NA | NA |
| 32 | 34 SVPSAIIYSW NA | NA |
| 31 | 22 SVPSAIVQTS NA | NA |
| 26 | 36 ARPAGVKMQF NA | NA |
| 52 | 64 GRPAGVKAHK NA | NA |
| 22 | 17 LRPAGVKGHL NA | NA |
| 49 | 72 DRPAGVKLMK NA | NA |
| 41 | 37 YRPAGVKQTK NA | NA |
| 72 | 67 CRPAGVKGQK NA | NA |
| 72 | 77 ARPAGVKSLR NA | NA |
| 58 | 85 CRPAGVKLKK NA | NA |
| 48 | 81 HRPAGVKRAY NA | NA |
| 31 | 39 ERPAGVKQVT NA | NA |
| 74 | 67 GRPAGVKRMK NA | NA |
| 46 | 47 RRPVAYSMSF NA | NA |
| 23 | 38 RRPVAYKMVS NA | NA |
| 34 | 32 RRPVAYKGEI NA | NA |
| 28 | 47 RRPVAYILNY NA | NA |
| 27 | 39 GVPSKLAYAK NA | NA |
| 27 | 41 GVPSKLTVIT NA | NA |
| 33 | 37 GVPSKLAVQH NA | NA |
| 49 | 50 GVPSKLTQRF NA | NA |
| 28 | 21 GVPSKLVKNR NA | NA |
| 11 | 5 GVPSKLISQK NA  | NA |
| 28 | 31 GVPSKLSSVW NA | NA |
| 14 | 19 GVPSKLRKPY NA | NA |
| 20 | 19 GVPSKLRGSS NA | NA |
| 25 | 45 GVPSKLRHA NA  | NA |
| 56 | 66 VKPSKLFERS NA | NA |
| 70 | 98 VKPSKLYRNW NA | NA |
| 17 | 17 VKPSKLMSHR NA | NA |
| 74 | 87 VKPSKLFKVF NA | NA |
| 60 | 73 VKPSKLIKGV NA | NA |
| 44 | 58 VKPSKLTVRG NA | NA |
| 79 | 75 VKPSKLFQGQ NA | NA |
| 58 | 77 VKPSKLALAW NA | NA |

|     |     |                 |    |
|-----|-----|-----------------|----|
| 44  | 57  | KSISNWIKIR NA   | NA |
| 70  | 93  | KSISNWWGWL NA   | NA |
| 68  | 97  | KSISNWTMTW NA   | NA |
| 28  | 26  | KSISNWTGNF NA   | NA |
| 16  | 15  | KSISNWTLQT NA   | NA |
| 38  | 47  | KSISNWTQNK NA   | NA |
| 76  | 95  | KSISNWTNRL NA   | NA |
| 24  | 27  | KSISNWTNMT NA   | NA |
| 59  | 68  | KSISNWTGGV NA   | NA |
| 129 | 118 | MGLANLKLKLRQ NA | NA |
| 73  | 82  | MGLANLANRV NA   | NA |
| 58  | 99  | MGLANLKLNK NA   | NA |
| 69  | 70  | MGLANLAVKL NA   | NA |
| 63  | 74  | STIAHYADGF NA   | NA |
| 48  | 66  | STIAHYADLT NA   | NA |
| 53  | 55  | STIAHYGGIH NA   | NA |
| 55  | 52  | STIAHYSVGG NA   | NA |
| 54  | 70  | STIAHYVYMT NA   | NA |
| 28  | 26  | STIAHYSQPI NA   | NA |
| 87  | 119 | STIAHYFGIG NA   | NA |
| 71  | 67  | STIAHYMMNR NA   | NA |
| 110 | 118 | STIAHYTLHS NA   | NA |
| 36  | 64  | RKLAFLFMVG NA   | NA |
| 68  | 111 | RKLAFLAQEG NA   | NA |
| 82  | 99  | RKLAFLSVHV NA   | NA |
| 75  | 101 | RKLAFLFAET NA   | NA |
| 41  | 54  | HAPSLYARWW NA   | NA |
| 15  | 27  | HAPSLYIVSV NA   | NA |
| 23  | 29  | HAPSLYIKEF NA   | NA |
| 29  | 46  | TVLGNLFSPK NA   | NA |
| 49  | 60  | TVLGNLKKHG NA   | NA |
| 120 | 121 | NRPSWVAGRK NA   | NA |
| 115 | 106 | NRPSWVSRPF NA   | NA |
| 76  | 115 | NRPSWVSQGG NA   | NA |
| 75  | 88  | NRPSWVRGAH NA   | NA |
| 37  | 62  | IAPAKLRGHG NA   | NA |
| 27  | 32  | IAPAKLFSWL NA   | NA |
| 20  | 32  | IAPAKLAQTG NA   | NA |
| 32  | 37  | IAPAKLAGWF NA   | NA |
| 27  | 32  | IAPAKLKQEK NA   | NA |
| 19  | 17  | IAPAKLKQHG NA   | NA |

|     |     |                |    |
|-----|-----|----------------|----|
| 74  | 74  | IAPAKLSVLL NA  | NA |
| 62  | 63  | IAPAKLSQMW NA  | NA |
| 5   | 13  | IAPAKLYNGK NA  | NA |
| 29  | 32  | IAPAKLYKMQ NA  | NA |
| 41  | 38  | ANPAQMRDVV NA  | NA |
| 65  | 72  | ENPAQMRGAV NA  | NA |
| 31  | 53  | HNPQMRDNL NA   | NA |
| 52  | 45  | PNPAQMRVTG NA  | NA |
| 88  | 96  | ANPAQMRKVG NA  | NA |
| 34  | 39  | GNPAQMRGGQ NA  | NA |
| 66  | 51  | YNPAQMRDEV NA  | NA |
| 75  | 110 | MNPAQMRGPF NA  | NA |
| 31  | 42  | NNPAQMRRAEW NA | NA |
| 60  | 55  | NNPAQMRKGR NA  | NA |
| 51  | 26  | HQPGAMMFLG NA  | NA |
| 39  | 56  | EQPGAMMFGL NA  | NA |
| 97  | 104 | FRPGAMMFWW NA  | NA |
| 15  | 22  | NSPGAMMFEH NA  | NA |
| 30  | 13  | MAPGAMMFGG NA  | NA |
| 25  | 41  | YAPGAMMFNR NA  | NA |
| 82  | 107 | NKPGAMMFMA NA  | NA |
| 47  | 53  | RYPGAMMFVA NA  | NA |
| 20  | 28  | NIPGAMMFSF NA  | NA |
| 75  | 112 | MYPGAMMFNG NA  | NA |
| 23  | 21  | LQIGHLIYIW NA  | NA |
| 38  | 51  | LQIGHLKVNW NA  | NA |
| 31  | 32  | LQIGHLRNTI NA  | NA |
| 36  | 55  | LQIGHLKQHI NA  | NA |
| 25  | 16  | LQIGHLMMIW NA  | NA |
| 28  | 39  | LQIGHLMYQG NA  | NA |
| 40  | 51  | GHIAWFFGLT NA  | NA |
| 70  | 68  | GHIAWFFVANR NA | NA |
| 43  | 52  | GHIAWFLGMT NA  | NA |
| 42  | 59  | GHIAWFRGAG NA  | NA |
| 52  | 34  | GHIAWFWKGV NA  | NA |
| 81  | 103 | GHIAWFYKLS NA  | NA |
| 50  | 69  | GHIAWFTKMY NA  | NA |
| 65  | 64  | GHIAWFYAQK NA  | NA |
| 106 | 122 | GHIAWFVMHQ NA  | NA |
| 33  | 35  | GHIAWFLKER NA  | NA |
| 58  | 72  | GHIAWFRQAT NA  | NA |

|     |     |               |    |
|-----|-----|---------------|----|
| 44  | 40  | GGPSTLRGGH NA | NA |
| 26  | 22  | GGPSTLKVGS NA | NA |
| 40  | 38  | GGPSTLLKQH NA | NA |
| 26  | 20  | GGPSTLADSQ NA | NA |
| 31  | 41  | GGPSTLLYWA NA | NA |
| 32  | 37  | GGPSTLTSRH NA | NA |
| 30  | 44  | GGPSTLFVGY NA | NA |
| 29  | 33  | GGPSTLVVQH NA | NA |
| 34  | 30  | GGPSTLLDSY NA | NA |
| 38  | 42  | GGPSTLYNGV NA | NA |
| 38  | 60  | GGPSTLKLRT NA | NA |
| 24  | 26  | TAPAKLRDRG NA | NA |
| 18  | 11  | IAPAKLRANS NA | NA |
| 40  | 49  | FAPAKLRMRL NA | NA |
| 19  | 21  | FAPAKLRGEF NA | NA |
| 12  | 25  | AAPAKLRNKK NA | NA |
| 39  | 43  | DAPAKLRYIG NA | NA |
| 58  | 69  | WAPAKLRANL NA | NA |
| 40  | 35  | GAPAKLRNTW NA | NA |
| 134 | 168 | WAPAKLRRLS NA | NA |
| 43  | 40  | VYPASFSVGG NA | NA |
| 39  | 30  | FMPASFSVTG NA | NA |
| 57  | 70  | CDPASFSVGT NA | NA |
| 47  | 63  | RYPASFSVGW NA | NA |
| 9   | 16  | GSPASFSVTY NA | NA |
| 30  | 28  | NFPASFSVTV NA | NA |
| 33  | 23  | WYPASFSVPT NA | NA |
| 28  | 42  | WDPASFSVIL NA | NA |
| 25  | 22  | PYPASFSVAT NA | NA |
| 41  | 48  | PIPASFSVGA NA | NA |
| 7   | 12  | CAPTALLGPG NA | NA |
| 19  | 24  | CAPTALLATG NA | NA |
| 61  | 67  | CAPTALRNHK NA | NA |
| 23  | 25  | CAPTALLLMG NA | NA |
| 48  | 90  | CAPTALMAAW NA | NA |
| 16  | 15  | CAPTALVKKL NA | NA |
| 57  | 72  | CAPTALRREY NA | NA |
| 16  | 25  | FAPARFTNPF NA | NA |
| 27  | 28  | WAPARFTGQK NA | NA |
| 7   | 13  | EAPARFTDKT NA | NA |
| 16  | 7   | GAPARFTGPI NA | NA |

|     |     |               |    |
|-----|-----|---------------|----|
| 24  | 35  | LAPARFTAKL NA | NA |
| 24  | 24  | NAPARFTQHR NA | NA |
| 20  | 36  | HAPARFTGGL NA | NA |
| 8   | 12  | TAPARFTQSR NA | NA |
| 6   | 14  | VAPARFTGIS NA | NA |
| 122 | 114 | PCPTGLKNLY NA | NA |
| 70  | 112 | MNPRQLSTVI NA | NA |
| 116 | 149 | MWPRQLSTLH NA | NA |
| 20  | 38  | SFPRQLSTPH NA | NA |
| 87  | 109 | WTPRQLSTIH NA | NA |
| 33  | 40  | NHPRQLSTEH NA | NA |
| 67  | 90  | GNPRQLSTLA NA | NA |
| 34  | 43  | QTPRQLSTGS NA | NA |
| 85  | 114 | MTPRQLSTNV NA | NA |
| 120 | 117 | RWPRQLSTKR NA | NA |
| 35  | 52  | HKPRQLSTIS NA | NA |
| 27  | 33  | MALSSLFMKG NA | NA |
| 23  | 21  | MALSSLAGTT NA | NA |
| 32  | 41  | MALSSLIMGG NA | NA |
| 38  | 30  | MALSSLFNRG NA | NA |
| 55  | 69  | TQPSPFRLNA NA | NA |
| 67  | 49  | TQPSPFMKPQ NA | NA |
| 36  | 30  | TQPSPFFLIA NA | NA |
| 72  | 72  | TQPSPFIWW NA  | NA |
| 58  | 74  | TQPSPFTALR NA | NA |
| 18  | 26  | KRLAFLFRGA NA | NA |
| 33  | 35  | KRLAFLRVIH NA | NA |
| 21  | 30  | KRLAFLRNPK NA | NA |
| 37  | 43  | KRLAFLSAVS NA | NA |
| 70  | 95  | KRLAFLRSGY NA | NA |
| 53  | 88  | FQIGSLFVPV NA | NA |
| 74  | 61  | FQIGSLRRMF NA | NA |
| 110 | 109 | FQIGSLRGHL NA | NA |
| 78  | 76  | FQIGSLSNKW NA | NA |
| 73  | 96  | FQIGSLRYQA NA | NA |
| 20  | 24  | LQLALYTGRI NA | NA |
| 9   | 20  | LQLALYTMHW NA | NA |
| 49  | 53  | LQLALYVSPF NA | NA |
| 30  | 40  | LQLALYTLSF NA | NA |
| 59  | 82  | LQLALYRSRS NA | NA |
| 10  | 14  | LQLALYKDPY NA | NA |

|     |     |                 |    |
|-----|-----|-----------------|----|
| 23  | 36  | LQLALYAATS NA   | NA |
| 36  | 37  | WYPSKLVNQA NA   | NA |
| 49  | 64  | WYPSKLSGNA NA   | NA |
| 57  | 52  | WYPSKLLDET NA   | NA |
| 16  | 32  | WYPSKLVYSS NA   | NA |
| 46  | 30  | WYPSKLVNGI NA   | NA |
| 31  | 46  | WYPSKLVQAI NA   | NA |
| 83  | 93  | WYPSKLVVVL NA   | NA |
| 53  | 70  | WYPSKLVGLV NA   | NA |
| 29  | 26  | WNPSYLVYWG NA   | NA |
| 39  | 47  | WNPSYLVAKIT NA  | NA |
| 71  | 60  | WNPSYLVSDAA NA  | NA |
| 76  | 95  | WNPSYLVWYAK NA  | NA |
| 83  | 120 | WNPSYLVLLAWV NA | NA |
| 97  | 130 | WNPSYLVARGV NA  | NA |
| 79  | 88  | WNPSYLVWYIA NA  | NA |
| 62  | 57  | WNPSYLVALL NA   | NA |
| 32  | 40  | PKPARLVYVKL NA  | NA |
| 53  | 58  | PKPARLVKYTQ NA  | NA |
| 44  | 56  | PKPARLVDPIN NA  | NA |
| 35  | 53  | PKPARLVIMEH NA  | NA |
| 33  | 45  | PKPARLVYGTI NA  | NA |
| 51  | 63  | PKPARLVSRVV NA  | NA |
| 31  | 45  | PKPARLVWDAR NA  | NA |
| 56  | 72  | PKPARLVSAGL NA  | NA |
| 61  | 76  | KQLASLVMDWE NA  | NA |
| 100 | 101 | KQLASLVFQWQ NA  | NA |
| 101 | 116 | KQLASLVMLRV NA  | NA |
| 58  | 66  | KQLASLVRGNG NA  | NA |
| 125 | 138 | PEPSAYRVGWH NA  | NA |
| 11  | 8   | KEPSAYRVGPG NA  | NA |
| 40  | 65  | YEPSAYRVMSQ NA  | NA |
| 168 | 185 | CEPSAYRVRAWQ NA | NA |
| 35  | 53  | LEPSAYRVQNV NA  | NA |
| 60  | 91  | HEPSAYRVAKT NA  | NA |
| 74  | 67  | AEPSAYRVDSV NA  | NA |
| 26  | 41  | TEPSAYRVGTS NA  | NA |
| 69  | 71  | CEPSAYRVSTQ NA  | NA |
| 50  | 55  | KEPSAYRVAMG NA  | NA |
| 101 | 133 | SEPSAYRVYQG NA  | NA |
| 34  | 37  | LGPSHYLVGQH NA  | NA |

|     |     |                |    |
|-----|-----|----------------|----|
| 55  | 68  | LGPSHYLKHV NA  | NA |
| 30  | 29  | LGPSHYANNY NA  | NA |
| 23  | 19  | LGPSHYLSLQ NA  | NA |
| 25  | 38  | LGPSHYTYQS NA  | NA |
| 45  | 48  | LGPSHYILEF NA  | NA |
| 26  | 49  | LGPSHYVLSR NA  | NA |
| 38  | 30  | LGPSHYIGAT NA  | NA |
| 29  | 45  | LGPSHYAGEA NA  | NA |
| 40  | 38  | LGPSHYSGRK NA  | NA |
| 31  | 50  | KVLSAVRLIR NA  | NA |
| 33  | 37  | KVLSAVKDKG NA  | NA |
| 64  | 58  | KVLSAVLRSR NA  | NA |
| 30  | 44  | KVLSAVKSVY NA  | NA |
| 46  | 61  | KVLSAVLNRY NA  | NA |
| 20  | 21  | KVLSAVLLPG NA  | NA |
| 12  | 17  | KVLSAVALIG NA  | NA |
| 44  | 55  | KVLSAVTSGH NA  | NA |
| 68  | 93  | NIPTRLARKF NA  | NA |
| 30  | 47  | NIPTRLSGIS NA  | NA |
| 61  | 71  | NIPTRLFRER NA  | NA |
| 31  | 55  | NIPTRLIKKQ NA  | NA |
| 24  | 34  | NIPTRLKLML NA  | NA |
| 40  | 75  | NIPTRLMMGK NA  | NA |
| 35  | 37  | NIPTRLSYTG NA  | NA |
| 96  | 97  | NIPTRLRARV NA  | NA |
| 31  | 59  | NIPTRLFSTR NA  | NA |
| 47  | 74  | RHPSHFRQRV NA  | NA |
| 67  | 107 | RHPSHFYRHI NA  | NA |
| 39  | 45  | RHPSHFWGQH NA  | NA |
| 21  | 27  | RHPSHFSDRK NA  | NA |
| 93  | 115 | RHPSHFMYEW NA  | NA |
| 106 | 142 | RHPSHF SRGW NA | NA |
| 85  | 97  | RHPSHFRMKL NA  | NA |
| 20  | 28  | RHPSHFKQPT NA  | NA |
| 81  | 113 | RHPSHFWDVW NA  | NA |
| 137 | 160 | RHPSHFMGHW NA  | NA |
| 55  | 63  | KMPSTLIKGW NA  | NA |
| 15  | 17  | KMPSTLYMKS NA  | NA |
| 42  | 36  | KMPSTLAYMS NA  | NA |
| 36  | 63  | KMPSTLSASV NA  | NA |
| 35  | 33  | KMPSTLMQMF NA  | NA |



|     |                    |    |
|-----|--------------------|----|
| 86  | 97 KMPSTLSLHL NA   | NA |
| 45  | 39 KMPSTLYMAR NA   | NA |
| 5   | 12 KMPSTLYVGL NA   | NA |
| 71  | 61 KMPSTLMYRT NA   | NA |
| 60  | 86 KMPSTLIKVK NA   | NA |
| 60  | 65 EWPSRMMGIA NA   | NA |
| 59  | 42 EWPSRMTGSY NA   | NA |
| 13  | 21 EWPSRMTSGG NA   | NA |
| 80  | 88 EWPSRMARHT NA   | NA |
| 54  | 62 EWPSRMVQLL NA   | NA |
| 51  | 42 EWPSRMVQGI NA   | NA |
| 35  | 56 EWPSRMFQPL NA   | NA |
| 43  | 56 EWPSRMAVEG NA   | NA |
| 40  | 55 EWPSRMIVLT NA   | NA |
| 61  | 70 EWPSRMKYEK NA   | NA |
| 46  | 41 ILLSPLYYMW NA   | NA |
| 20  | 47 ILLSPLKYRY NA   | NA |
| 31  | 46 ILLSPLIVGK NA   | NA |
| 46  | 49 ILLSPLYQGF NA   | NA |
| 13  | 22 ILLSPLYRSY NA   | NA |
| 11  | 16 RSPASVRNLQ NA   | NA |
| 46  | 65 IAPASVRNAR NA   | NA |
| 34  | 38 DRPASVRNNW NA   | NA |
| 12  | 25 PSPASVRNHR NA   | NA |
| 31  | 46 WFPASVRNVG NA   | NA |
| 46  | 34 YTPASVRNGR NA   | NA |
| 67  | 76 DMPASVRNWS NA   | NA |
| 50  | 48 HIPASVRNHV NA   | NA |
| 14  | 10 GAPASVRNQS NA   | NA |
| 28  | 50 HQPASVRNEV NA   | NA |
| 27  | 19 APPASVRNPA NA   | NA |
| 20  | 26 SSVSNLKVNV NA   | NA |
| 16  | 12 KSPTGLKNTG NA   | NA |
| 32  | 23 RGPSSYFGWW NA   | NA |
| 14  | 12 RGPSSYTAHG NA   | NA |
| 45  | 39 RGPSSYVDGT NA   | NA |
| 16  | 26 RGPSSYFDWS NA   | NA |
| 52  | 40 RGPSSYSGEW NA   | NA |
| 28  | 33 RGPSSYKMPQ NA   | NA |
| 18  | 21 RGPSSYLLLR NA   | NA |
| 127 | 159 CYP SHWIGMW NA | NA |

|     |                   |    |
|-----|-------------------|----|
| 30  | 38 APPSHWIGIL NA  | NA |
| 28  | 37 DAPSHWIGGW NA  | NA |
| 60  | 68 QTPSHWIGKG NA  | NA |
| 107 | 145 CRPSHWIGGL NA | NA |
| 49  | 56 AWPSHWIGGS NA  | NA |
| 50  | 107 IMPSHWIGAG NA | NA |
| 45  | 41 WAPSHWIGGQ NA  | NA |
| 41  | 47 PTPRSYKGIV NA  | NA |
| 56  | 67 PTPRSYKRHI NA  | NA |
| 26  | 22 TPPVELTVPW NA  | NA |
| 20  | 41 TPPVELSYSV NA  | NA |
| 14  | 24 TPPVELMGTW NA  | NA |
| 12  | 24 TPPVELKGAT NA  | NA |
| 23  | 33 TPPVELMSG A NA | NA |
| 24  | 26 TPPVELVDKT NA  | NA |
| 59  | 73 PKLAAIRMGH NA  | NA |
| 53  | 60 PKLAAIVYPV NA  | NA |
| 46  | 47 PKLAAIKKMT NA  | NA |
| 80  | 82 PKLAAISKRQ NA  | NA |
| 60  | 98 PKLAAIFGHV NA  | NA |
| 34  | 40 GHPSPFKSML NA  | NA |
| 56  | 74 GHPSPFAYGH NA  | NA |
| 28  | 44 GHPSPFAALT NA  | NA |
| 52  | 78 GHPSPF SRGY NA | NA |
| 67  | 67 GHPSPFYDWY NA  | NA |
| 51  | 63 GHPSPFTGMQ NA  | NA |
| 27  | 24 GHPSPFFRTS NA  | NA |
| 39  | 46 GHPSPFTLRH NA  | NA |
| 59  | 61 GHPSPFVYTH NA  | NA |
| 26  | 32 TPPSSLTVKA NA  | NA |
| 11  | 15 TPPSSLMMSF NA  | NA |
| 48  | 69 TPPSSLRYVA NA  | NA |
| 9   | 6 TPPSSLLSKH NA   | NA |
| 33  | 35 TPPSSLLMGG NA  | NA |
| 28  | 36 TPPSSLYSIQ NA  | NA |
| 47  | 39 TPPSSLLMGV NA  | NA |
| 19  | 22 TPPSSLVYVV NA  | NA |
| 21  | 23 TPPSSLKRNL NA  | NA |
| 11  | 16 TPPSSLGMH NA   | NA |
| 13  | 24 NQPSALDASG NA  | NA |
| 19  | 25 PTPSALDAAA NA  | NA |

|    |                   |    |
|----|-------------------|----|
| 99 | 132 HFPSALDAHI NA | NA |
| 42 | 63 WNPSALDARA NA  | NA |
| 20 | 14 DYPSALDAII NA  | NA |
| 61 | 87 IQPSALDAWL NA  | NA |
| 30 | 29 NTPSALDASV NA  | NA |
| 51 | 51 NDPSALDARQ NA  | NA |
| 47 | 52 WTPSALDANH NA  | NA |
| 34 | 38 RAPSALDAKG NA  | NA |
| 23 | 32 QRPAQMKQHY NA  | NA |
| 30 | 44 VRPAQMKGSR NA  | NA |
| 37 | 32 DRPAQMKGVF NA  | NA |
| 65 | 66 YRPAQMKLEF NA  | NA |
| 69 | 68 PRPAQMKNLA NA  | NA |
| 15 | 21 ARPAQMKLMQ NA  | NA |
| 52 | 45 DRPAQMKMVR NA  | NA |
| 50 | 42 VRPAQMKDGV NA  | NA |
| 43 | 54 DRPAQMKDKW NA  | NA |
| 81 | 95 MRPAQMKRAI NA  | NA |
| 85 | 101 QVPRRLIAQQ NA | NA |
| 30 | 45 QVPRRLKYTS NA  | NA |
| 36 | 54 QVPRRLLNTR NA  | NA |
| 52 | 86 FHPSRFSDMA NA  | NA |
| 69 | 71 FHPSRFGVVT NA  | NA |
| 56 | 65 FHPSRFLGNA NA  | NA |
| 26 | 43 FHPSRFTSNG NA  | NA |
| 45 | 70 FHPSRFAVKS NA  | NA |
| 64 | 96 FHPSRFTMER NA  | NA |
| 72 | 98 FHPSRFYMAF NA  | NA |
| 63 | 83 FHPSRFSGKQ NA  | NA |
| 20 | 31 SRPRTLFSWR NA  | NA |
| 60 | 63 SRPRTLSREL NA  | NA |
| 37 | 46 SRPRTLSGHQ NA  | NA |
| 19 | 21 SRPRTLARGI NA  | NA |
| 56 | 60 SRPRTLVKSA NA  | NA |
| 29 | 27 SRPRTLLQHK NA  | NA |
| 27 | 24 SRPRTLIGNG NA  | NA |
| 24 | 30 RAPVAFLGWK NA  | NA |
| 21 | 37 RAPVAFFAWL NA  | NA |
| 18 | 24 RAPVAFRVRG NA  | NA |
| 32 | 26 RAPVAFSSWW NA  | NA |
| 32 | 49 RAPVAFLNIW NA  | NA |

|     |     |                |    |
|-----|-----|----------------|----|
| 13  | 10  | RAPVAFLNQG NA  | NA |
| 9   | 6   | RAPVAFYYTF NA  | NA |
| 60  | 63  | WDIRSLSRIV NA  | NA |
| 34  | 44  | MSLATLFVPR NA  | NA |
| 70  | 94  | MSLATLTGAW NA  | NA |
| 59  | 81  | MSLATLVRQL NA  | NA |
| 56  | 47  | MSLATLAGAT NA  | NA |
| 43  | 53  | MSLATLWVLG NA  | NA |
| 122 | 120 | MSLATLAKRY NA  | NA |
| 25  | 33  | MSLATLIQPV NA  | NA |
| 30  | 46  | HRPSFLKNIV NA  | NA |
| 74  | 81  | CRPSFLKSAH NA  | NA |
| 26  | 38  | HRPSFLKRAG NA  | NA |
| 26  | 40  | GRPSFLKAGS NA  | NA |
| 15  | 22  | FRPSFLKLSW NA  | NA |
| 49  | 57  | FRPSFLKRMR NA  | NA |
| 2   | 7   | PRPSFLKSLG NA  | NA |
| 13  | 13  | QRPSFLKGLV NA  | NA |
| 30  | 27  | CRPSFLKNTQ NA  | NA |
| 11  | 13  | MRPSFLKYRT NA  | NA |
| 56  | 69  | VQLAYFKGLS NA  | NA |
| 46  | 58  | VQLAYFAYVT NA  | NA |
| 169 | 171 | VQLAYFYDHA NA  | NA |
| 30  | 37  | VQLAYFFVQW NA  | NA |
| 36  | 32  | VQLAYFIGAI NA  | NA |
| 45  | 46  | VQLAYFYVGR NA  | NA |
| 27  | 24  | VQLAYFSNKR NA  | NA |
| 37  | 44  | VQLAYFLMAT NA  | NA |
| 40  | 44  | VQLAYFFMTL NA  | NA |
| 65  | 76  | VQLAYFKRSQ NA  | NA |
| 27  | 42  | QRVAAVRGQQ NA  | NA |
| 46  | 57  | QRVAAVSSGW NA  | NA |
| 58  | 47  | SVPSTLMAAY NA  | NA |
| 49  | 47  | SVPSTLKKPF NA  | NA |
| 31  | 40  | SVPSTLTGQA NA  | NA |
| 91  | 93  | SVPSTLWQRK NA  | NA |
| 42  | 41  | SVPSTLSQMH NA  | NA |
| 57  | 64  | SVPSTLYSWR NA  | NA |
| 34  | 35  | SVPSTLVKTI NA  | NA |
| 24  | 38  | SVPSTLKQSK NA  | NA |
| 39  | 66  | VHPRTLVA VA NA | NA |

|     |     |               |    |
|-----|-----|---------------|----|
| 31  | 50  | GFPRTLNVNH NA | NA |
| 27  | 42  | SAPRTLNVNA NA | NA |
| 44  | 52  | AMPRTLNVWL NA | NA |
| 117 | 128 | MRPRTLNVAV NA | NA |
| 24  | 26  | DRPRTLNVGG NA | NA |
| 24  | 23  | IPPRTLNVGH NA | NA |
| 64  | 65  | KQPRTLNVMR NA | NA |
| 26  | 51  | RWPRTLNVIS NA | NA |
| 39  | 59  | VHPRTLNVSY NA | NA |
| 59  | 73  | VYPGKMARLV NA | NA |
| 56  | 94  | VYPGKMWLSA NA | NA |
| 68  | 99  | VYPGKMVQIW NA | NA |
| 51  | 51  | VYPGKMIGQY NA | NA |
| 52  | 48  | VYPGKMTQML NA | NA |
| 77  | 86  | VYPGKMLDIV NA | NA |
| 19  | 21  | VYPGKMASER NA | NA |
| 37  | 47  | TDIGEIRREG NA | NA |
| 18  | 19  | TDIGEIKQNA NA | NA |
| 23  | 18  | TDIGEIYGVR NA | NA |
| 36  | 56  | TDIGEIQRH NA  | NA |
| 19  | 15  | TDIGEILNSF NA | NA |
| 33  | 42  | TDIGEIRIG NA  | NA |
| 53  | 55  | TDIGEIKLWT NA | NA |
| 56  | 65  | VMPSGFVGKV NA | NA |
| 63  | 67  | VMPSGFRGKH NA | NA |
| 51  | 48  | VMPSGFFMWY NA | NA |
| 52  | 76  | VMPSGFANGH NA | NA |
| 80  | 107 | VMPSGFTGLR NA | NA |
| 45  | 51  | VMPSGFVDTA NA | NA |
| 44  | 62  | VMPSGFYMTA NA | NA |
| 57  | 62  | THPQWMINHV NA | NA |
| 69  | 73  | KDPQWMINHW NA | NA |
| 6   | 10  | LAPQWMINLK NA | NA |
| 40  | 31  | RPPQWMINGH NA | NA |
| 33  | 48  | DNPQWMINGH NA | NA |
| 24  | 40  | VRPQWMINGS NA | NA |
| 159 | 200 | IKPQWMINRK NA | NA |
| 69  | 68  | VKPQWMINKG NA | NA |
| 22  | 31  | AHPQWMINVS NA | NA |
| 93  | 117 | GRISALRKRT NA | NA |
| 65  | 78  | VSISALRKGH NA | NA |

|     |     |               |    |
|-----|-----|---------------|----|
| 90  | 105 | KDISALRKAT NA | NA |
| 87  | 128 | FMISALRKRA NA | NA |
| 87  | 115 | CYISALRKAT NA | NA |
| 111 | 146 | TNISALRKHT NA | NA |
| 48  | 47  | GQISALRKIQ NA | NA |
| 73  | 101 | IMISALRKAT NA | NA |
| 86  | 98  | HPISALRKEW NA | NA |
| 50  | 78  | NDISALRKAR NA | NA |
| 81  | 117 | CFISALRKGK NA | NA |
| 31  | 39  | KGPSGLLQVT NA | NA |
| 18  | 33  | KGPSGLSKEY NA | NA |
| 69  | 78  | KGPSGLKYAV NA | NA |
| 37  | 37  | KGPSGLFSTH NA | NA |
| 39  | 42  | KGPSGLRAEY NA | NA |
| 43  | 48  | RDLGFLIQGI NA | NA |
| 44  | 47  | RDLGFLKSRQ NA | NA |
| 62  | 64  | RDLGFLKDRA NA | NA |
| 82  | 80  | VWPSELRGQH NA | NA |
| 71  | 89  | GWPSELRYTT NA | NA |
| 43  | 69  | QWPSELRKAY NA | NA |
| 69  | 79  | YWPSELRGIV NA | NA |
| 100 | 95  | TWPSELRLWH NA | NA |
| 49  | 58  | DWPSELRGKR NA | NA |
| 23  | 29  | SWPSELRGQF NA | NA |
| 69  | 80  | PWPSELRMAY NA | NA |
| 59  | 68  | KWPSELRSHK NA | NA |
| 53  | 44  | YWPSELRSGG NA | NA |
| 59  | 66  | SVLSKLYKWS NA | NA |
| 58  | 63  | SVLSKLAAAQ NA | NA |
| 57  | 45  | SVLSKLSSNY NA | NA |
| 54  | 93  | SVLSKLMKNR NA | NA |
| 47  | 58  | SVLSKLFNVT NA | NA |
| 34  | 33  | SVLSKLIQWQ NA | NA |
| 20  | 49  | SVLSKLVVWV NA | NA |
| 43  | 35  | NPPSHLIANG NA | NA |
| 36  | 46  | NPPSHLLGSG NA | NA |
| 7   | 7   | NPPSHLILQW NA | NA |
| 24  | 28  | NPPSHLKSGI NA | NA |
| 21  | 29  | NPPSHLVVEA NA | NA |
| 27  | 31  | NPPSHLVDLG NA | NA |
| 14  | 29  | ATLAALVGVQ NA | NA |

|     |                   |    |
|-----|-------------------|----|
| 16  | 18 ATLAALMLTG NA  | NA |
| 32  | 38 ATLAALMRVW NA  | NA |
| 21  | 35 ATLAALTNGQ NA  | NA |
| 30  | 28 ATLAALTVTR NA  | NA |
| 60  | 73 ATLAALKSKH NA  | NA |
| 25  | 27 ATLAALFANF NA  | NA |
| 184 | 208 FEPQRMRSAA NA | NA |
| 56  | 58 KIPSALLMKG NA  | NA |
| 77  | 72 KIPSALFMSQ NA  | NA |
| 76  | 70 KIPSALIAGF NA  | NA |
| 16  | 20 KIPSALISWY NA  | NA |
| 60  | 52 KIPSALMDSG NA  | NA |
| 64  | 89 KIPSALRDGG NA  | NA |
| 48  | 65 KIPSALAAGW NA  | NA |
| 35  | 62 KIPSALMKKG NA  | NA |
| 51  | 47 KIPSALTNRS NA  | NA |
| 55  | 54 LIPAWLVSAH NA  | NA |
| 49  | 53 LIPAWLVMTL NA  | NA |
| 91  | 94 AHPSALVGWL NA  | NA |
| 82  | 95 AHPSALILMW NA  | NA |
| 58  | 79 AHPSALKVIA NA  | NA |
| 14  | 19 AHPSALADVF NA  | NA |
| 39  | 41 AHPSALLGEY NA  | NA |
| 39  | 53 AHPSALVAIS NA  | NA |
| 56  | 60 AHPSALVSMT NA  | NA |
| 68  | 64 AHPSALMNQQ NA  | NA |
| 43  | 45 AHPSALARVW NA  | NA |
| 34  | 31 RFPLKVIDQG NA  | NA |
| 43  | 60 RFPLKVIAPS NA  | NA |
| 50  | 60 RFPLKVSSAQ NA  | NA |
| 72  | 99 RFPLKVLRMH NA  | NA |
| 43  | 43 RFPLKVIKGT NA  | NA |
| 64  | 65 RFPLKVSAHT NA  | NA |
| 33  | 45 RFPLKVSGTG NA  | NA |
| 33  | 36 RFPLKVIQGF NA  | NA |
| 41  | 55 RFPLKVKRKA NA  | NA |
| 29  | 34 YGPRAIKGWI NA  | NA |
| 28  | 44 YGPRAIKGVH NA  | NA |
| 11  | 19 KAPAHLVQWK NA  | NA |
| 43  | 56 RVPVPMVGLF NA  | NA |
| 21  | 28 RVPVPMVYKI NA  | NA |

|     |                   |    |
|-----|-------------------|----|
| 18  | 23 RVPVPMMLNMF NA | NA |
| 112 | 98 WNPSWIMRGS NA  | NA |
| 93  | 133 IDPSWIMRHA NA | NA |
| 46  | 61 TAPSWIMRQF NA  | NA |
| 48  | 82 DYPSWIMRGS NA  | NA |
| 107 | 103 EKPSWIMRNT NA | NA |
| 59  | 93 TRPSWIMRSQ NA  | NA |
| 55  | 95 EQPSWIMRNK NA  | NA |
| 13  | 19 CAPSWIMRLT NA  | NA |
| 49  | 68 PNPSWIMRVS NA  | NA |
| 84  | 117 IDPSWIMRLR NA | NA |
| 80  | 68 NAPSWIMRAW NA  | NA |
| 18  | 19 LIPTSLKSSA NA  | NA |
| 33  | 30 LIPTSLAMKF NA  | NA |
| 32  | 56 LIPTSLANHK NA  | NA |
| 29  | 42 LIPTSLRGIS NA  | NA |
| 28  | 21 LIPTSLIDPQ NA  | NA |
| 22  | 25 LIPTSLSKEH NA  | NA |
| 37  | 40 LIPTSLADMT NA  | NA |
| 20  | 23 KSPRPYKNGT NA  | NA |
| 10  | 8 WSPSSYFDLY NA   | NA |
| 19  | 25 WSPSSYIVGG NA  | NA |
| 25  | 27 WSPSSYLAHF NA  | NA |
| 10  | 22 WSPSSYTSGL NA  | NA |
| 11  | 18 WSPSSYIAML NA  | NA |
| 15  | 16 WSPSSYFREY NA  | NA |
| 47  | 53 TLIRYLSNSQ NA  | NA |
| 26  | 47 TLIRYLSMWG NA  | NA |
| 26  | 30 TLIRYLKDSG NA  | NA |
| 42  | 42 TLIRYLIVAG NA  | NA |
| 52  | 57 TLIRYLKAKF NA  | NA |
| 37  | 54 TLIRYLKYTS NA  | NA |
| 32  | 43 RLPINLIVPY NA  | NA |
| 38  | 49 RLPINLSKLV NA  | NA |
| 19  | 13 RLPINLIQEI NA  | NA |
| 34  | 61 RLPINLKMQF NA  | NA |
| 42  | 32 RLPINLSQSG NA  | NA |
| 42  | 63 RMPRQVKYVA NA  | NA |
| 43  | 53 YIPTAFVVAH NA  | NA |
| 56  | 83 YIPTAFFAQW NA  | NA |
| 34  | 42 YIPTAFLGNA NA  | NA |



|     |     |                |    |
|-----|-----|----------------|----|
| 35  | 45  | YIPTAFFVPY NA  | NA |
| 39  | 47  | RRPSALIGNV NA  | NA |
| 63  | 59  | RRPSALFARK NA  | NA |
| 36  | 37  | RRPSALYKSQ NA  | NA |
| 37  | 43  | RRPSALKNEI NA  | NA |
| 30  | 46  | RRPSALYAEG NA  | NA |
| 53  | 48  | RRPSALIKNL NA  | NA |
| 75  | 103 | RRPSALRRAS NA  | NA |
| 42  | 61  | MSPRKFSMNL NA  | NA |
| 76  | 98  | MSPRKFVDRF NA  | NA |
| 162 | 184 | MSPRKFIRMW NA  | NA |
| 61  | 62  | MSPRKFBVGIT NA | NA |
| 21  | 29  | VKPSGVSSGG NA  | NA |
| 45  | 41  | VKPSGVFQLG NA  | NA |
| 22  | 39  | VKPSGVFVNR NA  | NA |
| 34  | 45  | VKPSGVKGKL NA  | NA |
| 34  | 47  | VKPSGVMRTS NA  | NA |
| 64  | 79  | KFPASLKGIV NA  | NA |
| 51  | 47  | KFPASLMQRT NA  | NA |
| 43  | 49  | KFPASLKMEI NA  | NA |
| 36  | 37  | KFPASLSQNY NA  | NA |
| 21  | 30  | NSPSDLIYSS NA  | NA |
| 30  | 26  | QRPSAMTSHV NA  | NA |
| 30  | 28  | ERPSAMTKNS NA  | NA |
| 25  | 35  | QRPSAMTMAW NA  | NA |
| 35  | 32  | WRPSAMTDHI NA  | NA |
| 43  | 44  | ARPSAMTSQL NA  | NA |
| 23  | 29  | PRPSAMTNAS NA  | NA |
| 81  | 87  | HRPSAMTRGI NA  | NA |
| 48  | 50  | GRPSAMTDGK NA  | NA |
| 42  | 67  | QRPSAMTMRL NA  | NA |
| 29  | 22  | ARPSAMTLNY NA  | NA |
| 33  | 28  | QRPSAMTQGT NA  | NA |
| 59  | 79  | YGPSLLARML NA  | NA |
| 39  | 35  | YGPSLLMVLR NA  | NA |
| 24  | 30  | YGPSLLFMVV NA  | NA |
| 22  | 20  | YGPSLLSYPL NA  | NA |
| 21  | 19  | YGPSLLMNQW NA  | NA |
| 28  | 29  | YGPSLLFMMY NA  | NA |
| 50  | 46  | YGPSLLLSTW NA  | NA |
| 72  | 103 | GAIRAMYGTH NA  | NA |

|     |                   |    |
|-----|-------------------|----|
| 23  | 19 YFPSSLFAPY NA  | NA |
| 27  | 47 GFPSSLFAKG NA  | NA |
| 98  | 106 KKPSSLFARK NA | NA |
| 26  | 47 ETPSSLFAIG NA  | NA |
| 53  | 71 FWPSSLFAVR NA  | NA |
| 10  | 16 YAPSSLFAET NA  | NA |
| 21  | 14 YSPSSLFAAA NA  | NA |
| 20  | 38 CPPSSLFAWI NA  | NA |
| 33  | 34 YYPSSLFAVG NA  | NA |
| 36  | 39 NVPVWMLDVF NA  | NA |
| 15  | 13 KSPSLYKVKI NA  | NA |
| 33  | 43 KSPSLYRLWY NA  | NA |
| 29  | 40 TWPRELKGNF NA  | NA |
| 57  | 65 TWPRELKGPH NA  | NA |
| 29  | 42 IWPRELKKII NA  | NA |
| 33  | 46 TWPRELKAHF NA  | NA |
| 40  | 50 KWPRELKDAY NA  | NA |
| 102 | 140 MWPRELKQSW NA | NA |
| 40  | 33 YWPRELKDLV NA  | NA |
| 29  | 18 LWPRELKSQG NA  | NA |
| 61  | 75 YWPRELKSGQ NA  | NA |
| 52  | 58 QWPRELKYGT NA  | NA |
| 24  | 32 PWPRELKGPG NA  | NA |
| 71  | 91 QPLSWVRLRS NA  | NA |
| 89  | 84 QPLSWVSDWW NA  | NA |
| 48  | 80 QPLSWVFLWR NA  | NA |
| 40  | 45 QPLSWVLDGQ NA  | NA |
| 48  | 74 QPLSWVSGAG NA  | NA |
| 38  | 40 QPLSWVVDNI NA  | NA |
| 52  | 60 QPLSWVFDVQ NA  | NA |
| 87  | 112 QPLSWVFGHY NA | NA |
| 48  | 63 QPLSWVMGPL NA  | NA |
| 12  | 15 RAPASLSAGT NA  | NA |
| 11  | 21 RAPASLMKLA NA  | NA |
| 23  | 21 RAPASLKGHG NA  | NA |
| 17  | 16 RAPASLSYNQ NA  | NA |
| 29  | 52 DPPVNLISQG NA  | NA |
| 41  | 36 GTPVNLISAQ NA  | NA |
| 15  | 26 SNPVNLISRS NA  | NA |
| 16  | 15 GTPVNLISKR NA  | NA |
| 24  | 49 IWPVNLISMG NA  | NA |

|    |                   |    |
|----|-------------------|----|
| 39 | 37 SWPVNLISSL NA  | NA |
| 19 | 14 ASPVNLISNA NA  | NA |
| 10 | 12 HYPVNLISEG NA  | NA |
| 11 | 19 ASPVNLISER NA  | NA |
| 18 | 26 VMLRFLSLMQ NA  | NA |
| 78 | 106 SQPIHMYVW NA  | NA |
| 17 | 15 ESFAALIMVT NA  | NA |
| 6  | 8 ESFAALILQL NA   | NA |
| 25 | 18 ESFAALSKGG NA  | NA |
| 31 | 43 RLPVAISGGI NA  | NA |
| 12 | 23 TSPVALKDPG NA  | NA |
| 21 | 35 TSPVALFMML NA  | NA |
| 31 | 31 TSPVALLGVQ NA  | NA |
| 39 | 59 YPFGSLSSGV NA  | NA |
| 75 | 84 YPFGSLIMEK NA  | NA |
| 69 | 93 RTLRSLIGAL NA  | NA |
| 57 | 39 YTLRSLIGEW NA  | NA |
| 37 | 37 FTLRSLIRSQ NA  | NA |
| 19 | 17 GTLRSLIGMG NA  | NA |
| 11 | 12 ATLRSLIQMK NA  | NA |
| 39 | 35 DTLRSLIGGL NA  | NA |
| 37 | 28 TTLRSLIYTI NA  | NA |
| 90 | 89 NTLRSLISRL NA  | NA |
| 22 | 27 RTLRSLINKH NA  | NA |
| 92 | 117 ARLGYLSRPL NA | NA |
| 48 | 59 ARLGYLINGA NA  | NA |
| 58 | 83 ARLGYLRGLW NA  | NA |
| 70 | 80 ARLGYLAKKR NA  | NA |
| 65 | 85 ARLGYLRQAT NA  | NA |
| 55 | 71 ARLGYLSMLT NA  | NA |
| 62 | 53 WPHGSLRVMG NA  | NA |
| 47 | 65 WPHGSLRNPL NA  | NA |
| 57 | 76 WPHGSLKNHS NA  | NA |
| 12 | 21 SYPRAFSKKI NA  | NA |
| 36 | 56 LYPRAFSLHT NA  | NA |
| 12 | 8 PYPRAFSQEG NA   | NA |
| 35 | 28 DYPRAFSQQS NA  | NA |
| 63 | 92 CYPRAFSYQT NA  | NA |
| 27 | 44 TYPRAFSGII NA  | NA |
| 34 | 35 GYPRAFSYSI NA  | NA |
| 50 | 43 GYPRAFSNWT NA  | NA |

|     |     |               |    |
|-----|-----|---------------|----|
| 35  | 32  | DYPRAFSQVK NA | NA |
| 26  | 24  | GYPRAFSGHF NA | NA |
| 67  | 74  | PYPVPFVQVQ NA | NA |
| 47  | 79  | PYPVPFYQGF NA | NA |
| 39  | 58  | PYPVPFLGKK NA | NA |
| 25  | 31  | PYPVPFADVI NA | NA |
| 48  | 72  | PYPVPFINTH NA | NA |
| 63  | 59  | PYPVPFSGMR NA | NA |
| 85  | 117 | PYPVPFRKLL NA | NA |
| 38  | 43  | YVPTGLKYVG NA | NA |
| 20  | 29  | YVPTGLKRSG NA | NA |
| 45  | 53  | VHFASLVVQY NA | NA |
| 16  | 13  | WHPVSLINQS NA | NA |
| 19  | 25  | WHPVSLIGNG NA | NA |
| 13  | 24  | WHPVSLAMMH NA | NA |
| 53  | 48  | WHPVSLVMGV NA | NA |
| 18  | 22  | WHPVSLIGNY NA | NA |
| 49  | 56  | WMAKLKARA NA  | NA |
| 55  | 81  | WMAKLWGGY NA  | NA |
| 43  | 68  | WMAKLWAAA NA  | NA |
| 84  | 85  | RLPVHYKKRF NA | NA |
| 48  | 73  | RLPVHYSDRG NA | NA |
| 169 | 218 | RLPVHYLAWV NA | NA |
| 9   | 11  | DLPAGLILQV NA | NA |
| 28  | 21  | DLPAGLVANI NA | NA |
| 28  | 29  | DLPAGLYNKS NA | NA |
| 39  | 38  | DLPAGLIMAT NA | NA |
| 60  | 71  | DLPAGLKVHL NA | NA |
| 72  | 81  | FNPIHLVMVY NA | NA |
| 54  | 92  | GTPTALRAHT NA | NA |
| 247 | 289 | AYPTALRAKQ NA | NA |
| 150 | 205 | DYPTALRAAA NA | NA |
| 63  | 71  | FIPTALRATG NA | NA |
| 160 | 163 | PIPTALRAVQ NA | NA |
| 57  | 53  | ARPTALRAMR NA | NA |
| 109 | 137 | HDPTALRAHY NA | NA |
| 285 | 342 | GMPTALRAMW NA | NA |
| 74  | 109 | YIPTALRAAF NA | NA |
| 158 | 190 | WMPTALRANS NA | NA |
| 25  | 22  | SNLNSFFGQR NA | NA |
| 4   | 0   | SNLNSFSLQH NA | NA |

|     |     |               |    |
|-----|-----|---------------|----|
| 48  | 41  | WRPRALKGWI NA | NA |
| 90  | 101 | HFPRALKGAF NA | NA |
| 48  | 59  | QTPRALKGIA NA | NA |
| 48  | 57  | CSPRALKGAR NA | NA |
| 51  | 77  | DTPRALKGPL NA | NA |
| 314 | 360 | VDPRALKGWS NA | NA |
| 206 | 238 | TNPRALKGAV NA | NA |
| 61  | 92  | VFPRALKGMF NA | NA |
| 52  | 55  | VRPRPFSAIY NA | NA |
| 27  | 39  | VRPRPFIMPI NA | NA |
| 29  | 42  | VRPRPFIKA NA  | NA |
| 20  | 35  | RKPAPWYSPR NA | NA |
| 26  | 29  | RKPAPWKNHK NA | NA |
| 7   | 12  | RKPAPWFSKV NA | NA |
| 49  | 59  | RKPAPWFGPF NA | NA |
| 54  | 42  | RKPAPWILPI NA | NA |
| 22  | 27  | RKPAPWRKPL NA | NA |
| 27  | 27  | RKPAPWRDRG NA | NA |
| 79  | 98  | YYPRALKRKS NA | NA |
| 75  | 81  | YYPRALKGRK NA | NA |
| 29  | 33  | TRIAYLVNGY NA | NA |
| 86  | 113 | TRIAYLLSHV NA | NA |
| 34  | 28  | TRIAYLIVPH NA | NA |
| 23  | 19  | TRIAYLILTI NA | NA |
| 36  | 39  | TRIAYLWSQF NA | NA |
| 32  | 55  | TRIAYLWRRT NA | NA |
| 63  | 64  | RKPGYLRIGL NA | NA |
| 259 | 332 | CNPSALRVRG NA | NA |
| 51  | 65  | VIPRPLKDEQ NA | NA |
| 46  | 41  | RRPTNLSAIK NA | NA |
| 21  | 26  | RRPTNLSKMH NA | NA |
| 36  | 35  | RRPTNLIMKK NA | NA |
| 91  | 117 | KRPADLRMHQ NA | NA |
| 66  | 79  | ERPADLRSGK NA | NA |
| 64  | 89  | NRPADLRNGH NA | NA |
| 34  | 54  | DRPADLRVKR NA | NA |
| 121 | 162 | NRPADLRLHL NA | NA |
| 106 | 126 | CRPADLRSQH NA | NA |
| 98  | 135 | CRPADLRYIL NA | NA |
| 28  | 32  | LRPADLRDIT NA | NA |
| 67  | 62  | RRPADLRSRI NA | NA |

|     |     |            |    |    |
|-----|-----|------------|----|----|
| 108 | 153 | LRPADLRRAT | NA | NA |
| 40  | 49  | ERPADLRKMA | NA | NA |
| 93  | 74  | VAMAALKRKT | NA | NA |
| 44  | 62  | GDMAALKRRT | NA | NA |
| 105 | 119 | PTMAALKRAA | NA | NA |
| 90  | 112 | WYMAALKRHF | NA | NA |
| 84  | 85  | YMAALKRSH  | NA | NA |
| 84  | 90  | PFMAALKRHI | NA | NA |
| 56  | 57  | VNMAALKRNY | NA | NA |
| 49  | 70  | RDMAALKRSY | NA | NA |
| 188 | 209 | HHMAALKRGF | NA | NA |
| 48  | 69  | QOMAALKRPH | NA | NA |
| 56  | 69  | DNMAALKRHG | NA | NA |
| 48  | 47  | RFPRPIKGRL | NA | NA |
| 41  | 35  | GSLAHLGKQ  | NA | NA |
| 46  | 62  | GSLAHLVALV | NA | NA |
| 41  | 35  | FMPAQILGG  | NA | NA |
| 20  | 25  | FMPAQSKNA  | NA | NA |
| 53  | 69  | FMPAQKNTV  | NA | NA |
| 25  | 47  | FMPAQISQW  | NA | NA |
| 62  | 78  | RQLAAILGTR | NA | NA |
| 181 | 239 | RQLAAIRYRR | NA | NA |
| 76  | 108 | RQLAAIMYWQ | NA | NA |
| 49  | 67  | RQLAAITNGQ | NA | NA |
| 62  | 74  | RQLAAIKLLR | NA | NA |
| 21  | 32  | RQLAAIYSEG | NA | NA |
| 62  | 64  | RQLAAIFDSG | NA | NA |
| 32  | 27  | RQLAAISREY | NA | NA |
| 52  | 79  | MSLGYLFNQQ | NA | NA |
| 94  | 114 | DKLASLRGWQ | NA | NA |
| 42  | 40  | DKLASLAGLH | NA | NA |
| 49  | 49  | DKLASLSYAY | NA | NA |
| 188 | 191 | DKLASLAYHL | NA | NA |
| 42  | 39  | DKLASLIAGS | NA | NA |
| 81  | 104 | DKLASLSNWL | NA | NA |
| 37  | 62  | GMPRYMKGPR | NA | NA |
| 36  | 53  | GMPRYMLKGH | NA | NA |
| 51  | 57  | RIPASLSKTL | NA | NA |
| 34  | 39  | RIPASLYQPL | NA | NA |
| 20  | 12  | RIPASLSSTG | NA | NA |
| 44  | 42  | RIPASLYAHY | NA | NA |

|     |     |            |    |    |
|-----|-----|------------|----|----|
| 37  | 48  | RIPASLMQHQ | NA | NA |
| 5   | 8   | YDISALLQNF | NA | NA |
| 29  | 41  | YDISALYYTG | NA | NA |
| 39  | 52  | YDISALWDGR | NA | NA |
| 42  | 40  | YDISALTDEW | NA | NA |
| 12  | 22  | YDISALIQMG | NA | NA |
| 37  | 50  | YDISALTGHF | NA | NA |
| 48  | 48  | YDISALMGVG | NA | NA |
| 39  | 34  | YDISALTAIL | NA | NA |
| 48  | 47  | TILRNIKGVQ | NA | NA |
| 33  | 25  | QRMASLSGLI | NA | NA |
| 45  | 70  | VFVSNLKGWI | NA | NA |
| 81  | 90  | VFVSNLKLVV | NA | NA |
| 26  | 36  | GIPAYWRTPR | NA | NA |
| 54  | 58  | VAPAYWRTIL | NA | NA |
| 70  | 73  | AFPAYWRTPT | NA | NA |
| 61  | 63  | DRPAYWRTPK | NA | NA |
| 58  | 76  | QQPAYWRTQY | NA | NA |
| 51  | 50  | VAPAYWRTGG | NA | NA |
| 93  | 131 | WIPAYWRTTA | NA | NA |
| 67  | 67  | DAPAYWRTL  | NA | NA |
| 84  | 100 | CTPAYWRTWA | NA | NA |
| 62  | 46  | WKVSSLKKGQ | NA | NA |
| 43  | 46  | DWVSYLKDLG | NA | NA |
| 37  | 55  | TWVSYLKRSI | NA | NA |
| 42  | 53  | VWVSYLKNMS | NA | NA |
| 16  | 23  | HWVSYLKKSF | NA | NA |
| 49  | 69  | DWVSYLKDGW | NA | NA |
| 47  | 43  | DWVSYLKL   | NA | NA |
| 92  | 105 | RWVSYLKRWT | NA | NA |
| 62  | 77  | TWVSYLKGKW | NA | NA |
| 40  | 51  | IWVSYLKM   | NA | NA |
| 35  | 50  | DWVSYLKDGT | NA | NA |
| 19  | 28  | FDISHLTLRG | NA | NA |
| 23  | 33  | FDISHLVNHS | NA | NA |
| 19  | 22  | FDISHLVLQW | NA | NA |
| 69  | 74  | FDISHLFQKL | NA | NA |
| 89  | 94  | MSLGNLRYVI | NA | NA |
| 71  | 79  | MSLGNLSSGV | NA | NA |
| 106 | 125 | MSLGNLRYHS | NA | NA |
| 65  | 90  | RQLAHISMSF | NA | NA |

|     |     |                 |    |
|-----|-----|-----------------|----|
| 76  | 69  | EQLSFLFQGW NA   | NA |
| 67  | 91  | EQLSFLMNHH NA   | NA |
| 42  | 75  | EQLSFLAGLA NA   | NA |
| 60  | 74  | EQLSFLRSVI NA   | NA |
| 59  | 66  | EQLSFLAGIQ NA   | NA |
| 69  | 99  | EQLSFLRQ GK NA  | NA |
| 33  | 33  | YKPAGLKQVQ NA   | NA |
| 54  | 64  | YKPAGLFYTI NA   | NA |
| 36  | 57  | YKPAGLVVSL NA   | NA |
| 49  | 40  | YKPAGLILTK NA   | NA |
| 34  | 40  | YKPAGLIGTG NA   | NA |
| 65  | 71  | YKPAGLFMLS NA   | NA |
| 27  | 22  | YKPAGLSGET NA   | NA |
| 70  | 70  | YKPAGLYYPT NA   | NA |
| 38  | 40  | YKPAGLYSIQ NA   | NA |
| 40  | 37  | TTLRW WILGF NA  | NA |
| 48  | 59  | TTLRW WIRWY NA  | NA |
| 81  | 107 | TTLRW WL VTH NA | NA |
| 42  | 70  | TTLRW WFLKH NA  | NA |
| 42  | 66  | TTLRW WFDRT NA  | NA |
| 41  | 42  | TTLRW WF AAI NA | NA |
| 46  | 52  | HAHASLILEA NA   | NA |
| 54  | 71  | HAHASLIQWY NA   | NA |
| 26  | 61  | RDLSHLFNSQ NA   | NA |
| 43  | 51  | RDLSHLSKNY NA   | NA |
| 60  | 78  | RDLSHLIGAV NA   | NA |
| 40  | 55  | RDLSHLFG LH NA  | NA |
| 58  | 71  | GRPSGMRVRA NA   | NA |
| 45  | 58  | QNPSGMRVPT NA   | NA |
| 71  | 58  | RFPSGMRVNW NA   | NA |
| 34  | 41  | GDPSGMRVGL NA   | NA |
| 28  | 45  | WPPSGMRVEY NA   | NA |
| 90  | 144 | CRPSGMRVTH NA   | NA |
| 107 | 100 | HHPSGMRVVR NA   | NA |
| 46  | 51  | TMPSGMRVPI NA   | NA |
| 147 | 168 | MKPSGMRVAV NA   | NA |
| 86  | 85  | WHPSGMRVVG NA   | NA |
| 53  | 92  | WYPSGMRVMT NA   | NA |
| 30  | 41  | NRPASWVRGY NA   | NA |
| 73  | 78  | NRPASWKNRK NA   | NA |
| 31  | 36  | NRPASWLYIW NA   | NA |



|    |     |               |    |
|----|-----|---------------|----|
| 44 | 57  | NRPASWIMVG NA | NA |
| 52 | 55  | KMPSFLFNVW NA | NA |
| 75 | 87  | KMPSFLVNWQ NA | NA |
| 49 | 53  | KMPSFLIGIG NA | NA |
| 54 | 60  | KMPSFLIDIV NA | NA |
| 21 | 23  | KMPSFLLNLA NA | NA |
| 27 | 33  | RPPSSLMYGL NA | NA |
| 5  | 7   | RPPSSLYNTF NA | NA |
| 21 | 43  | RPPSSLYGGK NA | NA |
| 39 | 51  | RPPSSLSRGQ NA | NA |
| 10 | 12  | RPPSSLTAQL NA | NA |
| 31 | 32  | RPPSSLLEET NA | NA |
| 10 | 10  | RPPSSLSYER NA | NA |
| 12 | 17  | RPPSSLTSAI NA | NA |
| 72 | 65  | ATIAHLVVEK NA | NA |
| 22 | 30  | ATIAHLILMA NA | NA |
| 20 | 30  | ATIAHLVSEI NA | NA |
| 39 | 52  | LTPRYWLDGQ NA | NA |
| 37 | 53  | SLPTSLKLVR NA | NA |
| 44 | 40  | SLPTSLALNQ NA | NA |
| 26 | 25  | SLPTSLMLVI NA | NA |
| 23 | 25  | SLPTSLFDSH NA | NA |
| 19 | 17  | SLPTSLSQPV NA | NA |
| 75 | 82  | DSLAWLSDHR NA | NA |
| 67 | 78  | DSLAWLTYWL NA | NA |
| 56 | 59  | DSLAWLSNTR NA | NA |
| 91 | 125 | DSLAWLRLTQ NA | NA |
| 49 | 65  | DSLAWLILPY NA | NA |
| 53 | 60  | DSLAWLMNEH NA | NA |
| 76 | 74  | DSLAWLANRY NA | NA |
| 82 | 124 | TVPRAWVLHL NA | NA |
| 47 | 59  | TVPRAWSNPG NA | NA |
| 79 | 101 | TVPRAWKVMF NA | NA |
| 69 | 88  | TVPRAWKYGH NA | NA |
| 17 | 19  | TVPRAWIASG NA | NA |
| 8  | 18  | TSLANLAAPQ NA | NA |
| 54 | 58  | TSLANLKSRA NA | NA |
| 19 | 24  | TSLANLFATS NA | NA |
| 29 | 40  | TSLANLAGIV NA | NA |
| 25 | 26  | TSLANLINGI NA | NA |
| 81 | 114 | AFLSHWVKHG NA | NA |

|     |                   |    |
|-----|-------------------|----|
| 49  | 43 AFLSHWFVNW NA  | NA |
| 46  | 56 IAFSQLKGAV NA  | NA |
| 25  | 28 IAFSQLIRLK NA  | NA |
| 51  | 46 GRLASLRYKV NA  | NA |
| 73  | 102 GRLASLARPL NA | NA |
| 70  | 86 GRLASLFSMW NA  | NA |
| 56  | 61 GRLASLKAGF NA  | NA |
| 52  | 36 GRLASLASAQ NA  | NA |
| 99  | 92 GRLASLRYIR NA  | NA |
| 94  | 88 GRLASLMRSF NA  | NA |
| 112 | 135 GRLASLFYRL NA | NA |
| 48  | 46 FSLRQMLSIG NA  | NA |
| 42  | 46 FSLRQMIRPH NA  | NA |
| 32  | 45 FSLRQMSAAY NA  | NA |
| 23  | 39 FSLRQMKVTF NA  | NA |
| 56  | 73 GKPAWMKGPQ NA  | NA |
| 51  | 57 DQPAWMKGPY NA  | NA |
| 44  | 47 FFPAWMKGEF NA  | NA |
| 28  | 43 ADPAWMKGNL NA  | NA |
| 17  | 29 FTPAWMKGEG NA  | NA |
| 84  | 99 NYPAWMKGIW NA  | NA |
| 81  | 91 NHPAWMKGGH NA  | NA |
| 39  | 49 ANPAWMKGAS NA  | NA |
| 67  | 104 KNPAWMKGQH NA | NA |
| 42  | 66 NQPAWMKGMT NA  | NA |
| 72  | 80 MIPAWMKGMR NA  | NA |
| 76  | 83 TRLAHVKGKW NA  | NA |
| 71  | 83 TRLAHVYAGS NA  | NA |
| 28  | 68 TRLAHVTDTK NA  | NA |
| 38  | 54 TRLAHVTLML NA  | NA |
| 62  | 73 TRLAHVKGWG NA  | NA |
| 45  | 47 TRLAHVADRS NA  | NA |
| 68  | 76 TRLAHVFLGI NA  | NA |
| 40  | 56 TRLAHVFGLQ NA  | NA |
| 107 | 143 KKLASLRGQH NA | NA |
| 151 | 198 MKLASLRNQF NA | NA |
| 54  | 70 PKLASLRVLT NA  | NA |
| 77  | 85 VKLASLRSEQ NA  | NA |
| 38  | 42 GKLASLRDKS NA  | NA |
| 55  | 62 TKLASLRDNT NA  | NA |
| 131 | 132 EKLASLRGWA NA | NA |

|     |                   |    |
|-----|-------------------|----|
| 22  | 21 AKLASLRQEV NA  | NA |
| 58  | 56 DKLASLRMGF NA  | NA |
| 110 | 128 AKLASLRLPL NA | NA |
| 72  | 70 GKLASLRSPW NA  | NA |
| 80  | 83 VLPRSWIRNW NA  | NA |
| 34  | 48 VLPRSWFLRF NA  | NA |
| 34  | 37 ITPSALTVWA NA  | NA |
| 66  | 66 NTPSALTVRK NA  | NA |
| 50  | 51 QTPSALTQMV NA  | NA |
| 48  | 65 RTPSALTQSW NA  | NA |
| 34  | 47 WTPSALTMV NA   | NA |
| 56  | 70 TTPSALTLWA NA  | NA |
| 29  | 27 DTPSALTKGY NA  | NA |
| 42  | 57 ATPSALTYHT NA  | NA |
| 31  | 42 TTPSALTGVL NA  | NA |
| 56  | 59 FTPSALTRGH NA  | NA |
| 85  | 121 RMLAQLRQPT NA | NA |
| 69  | 84 RMLAQLFVGF NA  | NA |
| 76  | 112 RMLAQLRMGI NA | NA |
| 132 | 183 RMLAQLRSHK NA | NA |
| 9   | 16 LLFSQLIYLR NA  | NA |
| 56  | 97 LLFSQLIRLA NA  | NA |
| 18  | 16 LLFSQLKSKT NA  | NA |
| 40  | 50 AVLSNLANAQ NA  | NA |
| 49  | 65 AVLSNLSANF NA  | NA |
| 55  | 73 AVLSNLFNWS NA  | NA |
| 18  | 37 AVLSNLMQTY NA  | NA |
| 52  | 64 SLPRPLKDVY NA  | NA |
| 39  | 30 SLPRPLKQPY NA  | NA |
| 50  | 65 PRLTHLVQAQ NA  | NA |
| 33  | 51 PRLTHLIYSG NA  | NA |
| 105 | 108 NLPTALRDAV NA | NA |
| 85  | 101 TLPTALRSVR NA | NA |
| 137 | 185 NLPTALRYWY NA | NA |
| 87  | 104 WLPTALRRTY NA | NA |
| 102 | 122 SLPTALRVPF NA | NA |
| 47  | 86 LLPTALRQKY NA  | NA |
| 203 | 246 HLPTALRMGY NA | NA |
| 102 | 109 QLPTALRSLW NA | NA |
| 86  | 84 KLPTALRYKA NA  | NA |
| 213 | 260 YLPTALRLAV NA | NA |

|     |                   |    |
|-----|-------------------|----|
| 104 | 138 QLPTALRMMV NA | NA |
| 44  | 53 CKPASLDGGQ NA  | NA |
| 22  | 31 GKPASLDGVG NA  | NA |
| 31  | 36 RKPASLDYNA NA  | NA |
| 12  | 17 VKPASLDSTG NA  | NA |
| 71  | 78 EKPASLDGPV NA  | NA |
| 68  | 100 EKPASLDLPV NA | NA |
| 46  | 61 IKPASLDAQG NA  | NA |
| 45  | 47 EKPASLDNTQ NA  | NA |
| 29  | 25 GKPASLDNNA NA  | NA |
| 27  | 40 RILGYLMKSG NA  | NA |
| 35  | 33 RILGYLKSMI NA  | NA |
| 61  | 83 RILGYLRVGT NA  | NA |
| 12  | 17 RILGYLMMSF NA  | NA |
| 29  | 38 LPHVSLVNLL NA  | NA |
| 37  | 56 CRHVSLVNLL NA  | NA |
| 77  | 93 LKLGTLKNG NA   | NA |
| 53  | 71 KQLGTLKQ NA    | NA |
| 34  | 31 GFLGTLKGG NA   | NA |
| 35  | 32 PNLGTLKTT NA   | NA |
| 32  | 29 LALGTLKAS NA   | NA |
| 25  | 27 PALGTLKVA NA   | NA |
| 78  | 98 KNLGTLKMQ NA   | NA |
| 51  | 89 CILGTLKIQ NA   | NA |
| 34  | 49 TNLGTLKTK NA   | NA |
| 79  | 99 RMLGTLKKNW NA  | NA |
| 31  | 52 IDLGTLKAI NA   | NA |
| 5   | 8 CWISYMRILR NA   | NA |
| 116 | 132 YHISYMRIMG NA | NA |
| 14  | 20 EHISYMRILY NA  | NA |
| 51  | 68 MKISYMRISG NA  | NA |
| 35  | 31 DFISYMRIII NA  | NA |
| 41  | 51 ARISYMRIVF NA  | NA |
| 17  | 18 WSISYMRIVW NA  | NA |
| 58  | 54 SQISYMRIRA NA  | NA |
| 82  | 90 EHISYMRIWQ NA  | NA |
| 30  | 47 GKISYMRITW NA  | NA |
| 29  | 32 NSISYMRIER NA  | NA |
| 36  | 33 VSLAYLSRNS NA  | NA |
| 75  | 83 VSLAYLRQTR NA  | NA |
| 32  | 36 VSLAYLSRTR NA  | NA |

|    |     |                |    |
|----|-----|----------------|----|
| 22 | 32  | VSLAYLSRQI NA  | NA |
| 62 | 91  | VSLAYLKRAF NA  | NA |
| 21 | 19  | VSLAYLMSPK NA  | NA |
| 17 | 27  | RYISFMSVAA NA  | NA |
| 47 | 44  | KQISFMSVWV NA  | NA |
| 33 | 32  | VAISFMSVQV NA  | NA |
| 20 | 25  | HAISFMSVEK NA  | NA |
| 62 | 73  | MTISFMSVGA NA  | NA |
| 12 | 22  | CNISFMSVSY NA  | NA |
| 39 | 33  | RMISFMSVRR NA  | NA |
| 52 | 51  | KWISFMSVIT NA  | NA |
| 7  | 14  | RSISFMSVNA NA  | NA |
| 25 | 34  | RYISFMSVWG NA  | NA |
| 64 | 61  | WTLAAMSVKR NA  | NA |
| 31 | 49  | FTLAAMSKPG NA  | NA |
| 60 | 51  | DTLAAMSQMK NA  | NA |
| 53 | 60  | MTLAAMSQIG NA  | NA |
| 42 | 44  | WTLAAMSNNNA NA | NA |
| 49 | 57  | KTLAAMSGPK NA  | NA |
| 57 | 39  | LTLAAMSMGI NA  | NA |
| 91 | 110 | MTLAAMSYLI NA  | NA |
| 41 | 52  | TTPSWLFGTH NA  | NA |
| 48 | 63  | TTPSWLFYLA NA  | NA |
| 30 | 19  | TTPSWLLNVG NA  | NA |
| 28 | 33  | TTPSWLASAH NA  | NA |
| 84 | 93  | TTPSWLSGQY NA  | NA |
| 31 | 32  | TTPSWLLALV NA  | NA |
| 20 | 40  | DMPARLISEG NA  | NA |
| 49 | 64  | WKPARLISTS NA  | NA |
| 40 | 43  | YKPARLISPK NA  | NA |
| 56 | 55  | ENPARLISGR NA  | NA |
| 53 | 59  | AAPARLISIW NA  | NA |
| 68 | 71  | DIPARLISER NA  | NA |
| 18 | 15  | GMPARLISEY NA  | NA |
| 43 | 58  | LYPARLISIF NA  | NA |
| 65 | 71  | NYPARLISQW NA  | NA |
| 24 | 31  | ASPARLISPT NA  | NA |
| 31 | 37  | QQPVPMLNGV NA  | NA |
| 54 | 64  | GQPVPMLQSW NA  | NA |
| 31 | 38  | DQPVPMLDEY NA  | NA |
| 56 | 60  | NQPVPMLYES NA  | NA |

|    |                   |    |
|----|-------------------|----|
| 32 | 29 IQPVPMLSPF NA  | NA |
| 58 | 86 PQPVPMLRVL NA  | NA |
| 38 | 45 GQPVPMLGVY NA  | NA |
| 45 | 70 SQPVPMLVTV NA  | NA |
| 31 | 56 AQPVPMLKGF NA  | NA |
| 39 | 43 AQPVPMLAEH NA  | NA |
| 62 | 71 SQPVPMLYPL NA  | NA |
| 92 | 112 FMMGNMKNIW NA | NA |
| 42 | 33 ERPGWLWGKG NA  | NA |
| 73 | 96 ERPGWLKRMF NA  | NA |
| 26 | 51 ERPGWLAMGL NA  | NA |
| 80 | 100 ERPGWLKNHG NA | NA |
| 31 | 42 ERPGWLTksy NA  | NA |
| 46 | 50 ERPGWLRNqK NA  | NA |
| 29 | 28 ERPGWLTkII NA  | NA |
| 84 | 90 ERPGWLKRSV NA  | NA |
| 61 | 64 ERPGWLAYAK NA  | NA |
| 48 | 54 ERPGWLKSHI NA  | NA |
| 30 | 32 HYPSSLFRKS NA  | NA |
| 30 | 37 HYPSSLVYWL NA  | NA |
| 37 | 48 HYPSSLFASY NA  | NA |
| 78 | 66 HYPSSLMYNK NA  | NA |
| 41 | 36 HYPSSLIDMT NA  | NA |
| 79 | 104 HYPSSLMYQH NA | NA |
| 62 | 62 HYPSSLlder NA  | NA |
| 38 | 45 MYFSELTLAT NA  | NA |
| 17 | 18 VSFSELTLMS NA  | NA |
| 11 | 18 RIFSELTLGG NA  | NA |
| 22 | 16 HTFSELTLNR NA  | NA |
| 29 | 8 ESFSELTLPG NA   | NA |
| 36 | 28 RHFSELTLMW NA  | NA |
| 8  | 16 RTFSELTLsk NA  | NA |
| 43 | 79 CIFSELTLKI NA  | NA |
| 10 | 17 QHFSELTLIG NA  | NA |
| 29 | 38 GFFSELTLKQ NA  | NA |
| 47 | 53 WHFGALKKQV NA  | NA |
| 35 | 35 WHFGALIYLT NA  | NA |
| 62 | 86 WHFGALVLPQ NA  | NA |
| 73 | 97 WHFGALKVHY NA  | NA |
| 63 | 90 MVPLNVKSGW NA  | NA |
| 53 | 67 PVPLNVKSHQ NA  | NA |

|     |                   |    |
|-----|-------------------|----|
| 50  | 55 HVPLNVKVQW NA  | NA |
| 30  | 32 WVPLNVKLET NA  | NA |
| 77  | 88 MVPLNVKNQQ NA  | NA |
| 53  | 63 HVPLNVKYGT NA  | NA |
| 36  | 53 TVPLNVKKGW NA  | NA |
| 24  | 30 NVPLNVKDGS NA  | NA |
| 35  | 36 CVPLNVKKRG NA  | NA |
| 41  | 46 QVPLNVKDIW NA  | NA |
| 18  | 31 SVPLNVKAQG NA  | NA |
| 12  | 19 ISPATLYNGH NA  | NA |
| 47  | 51 ISPATLRLRV NA  | NA |
| 28  | 41 ISPATLSQPS NA  | NA |
| 19  | 33 ISPATLYLRI NA  | NA |
| 35  | 43 RHLAKLSKVY NA  | NA |
| 82  | 78 RHLAKLSNPG NA  | NA |
| 55  | 76 RHLAKLRQHS NA  | NA |
| 13  | 12 RHLAKLKVPQ NA  | NA |
| 95  | 120 RHLAKLMVGW NA | NA |
| 67  | 91 RHLAKLINKQ NA  | NA |
| 37  | 49 RHLAKLMAEG NA  | NA |
| 103 | 122 RHLAKLRRVY NA | NA |
| 36  | 62 RHLAKLAKEA NA  | NA |
| 54  | 40 RHLAKLIKHF NA  | NA |
| 45  | 78 EWLGELRGNS NA  | NA |
| 55  | 80 CQLGELRGIS NA  | NA |
| 14  | 27 PDLGELRGWG NA  | NA |
| 58  | 63 TNLGELRGNQ NA  | NA |
| 79  | 110 YKLGELRGHV NA | NA |
| 127 | 105 AMLGELRGWR NA | NA |
| 29  | 51 MDLGELRGGF NA  | NA |
| 29  | 36 VSLGELRGGG NA  | NA |
| 40  | 48 SMLGELRGEY NA  | NA |
| 171 | 216 NIPSNMLRRF NA | NA |
| 104 | 123 GSPSNMLRLR NA | NA |
| 58  | 44 VTPSNMLRHS NA  | NA |
| 20  | 12 HRPSNMLRPG NA  | NA |
| 92  | 93 PWPSNMLRGS NA  | NA |
| 60  | 82 HAPSNMLRNW NA  | NA |
| 57  | 66 ADPSNMLRMV NA  | NA |
| 55  | 76 NMPSNMLREL NA  | NA |
| 23  | 18 LRPSNMLRPL NA  | NA |

|     |     |              |    |    |
|-----|-----|--------------|----|----|
| 39  | 61  | KVLGHL SVQR  | NA | NA |
| 79  | 100 | QVLGHL SVQK  | NA | NA |
| 36  | 32  | VVLGHL SVKS  | NA | NA |
| 85  | 121 | DVLGHL SYVL  | NA | NA |
| 96  | 103 | IVLGHL SREK  | NA | NA |
| 93  | 119 | PVLGHL SQHI  | NA | NA |
| 54  | 68  | RVLGHL SAAH  | NA | NA |
| 34  | 51  | IVLGHL SSTW  | NA | NA |
| 26  | 38  | WVLGHL SVSS  | NA | NA |
| 47  | 57  | PVLGHL SRQG  | NA | NA |
| 97  | 92  | AVLGHL SAML  | NA | NA |
| 77  | 84  | KHFLEL RVNV  | NA | NA |
| 112 | 120 | RNLASL RLVA  | NA | NA |
| 54  | 75  | KDLASL RLTK  | NA | NA |
| 53  | 82  | NALASL RLWF  | NA | NA |
| 75  | 71  | SYLASL RLVW  | NA | NA |
| 47  | 53  | IFLASL RLMA  | NA | NA |
| 370 | 449 | HHLASL RLLW  | NA | NA |
| 62  | 87  | TFLASL RLQR  | NA | NA |
| 95  | 102 | PDLASL RLQI  | NA | NA |
| 61  | 76  | EILASL RL SK | NA | NA |
| 105 | 151 | SSLASL RL RF | NA | NA |
| 123 | 166 | QHLAAL FAAR  | NA | NA |
| 43  | 60  | QHLAAL FRIG  | NA | NA |
| 52  | 63  | QHLAAL KRVT  | NA | NA |
| 48  | 85  | QHLAAL SGQW  | NA | NA |
| 35  | 51  | QHLAAL RVTS  | NA | NA |
| 37  | 24  | QHLAAL KYGY  | NA | NA |
| 54  | 55  | QHLAAL YMRV  | NA | NA |
| 49  | 42  | QHLAAL IGGQ  | NA | NA |
| 25  | 32  | KAIQTM KVNG  | NA | NA |
| 49  | 54  | CYIQTM KV SF | NA | NA |
| 66  | 75  | KRIQTM KVHV  | NA | NA |
| 41  | 53  | AHIQTM KV VF | NA | NA |
| 79  | 105 | MWIQTM KV WG | NA | NA |
| 48  | 51  | RNIQTM KV WY | NA | NA |
| 46  | 55  | DFIQTM KV LK | NA | NA |
| 88  | 126 | KIIQTM KV WT | NA | NA |
| 159 | 209 | QKIQTM KV WH | NA | NA |
| 58  | 53  | HHIQTM KV ST | NA | NA |
| 67  | 70  | NFIQTM KV MV | NA | NA |



|     |     |             |    |    |
|-----|-----|-------------|----|----|
| 38  | 46  | TALGYLANPG  | NA | NA |
| 174 | 191 | TALGYLRRRR  | NA | NA |
| 39  | 29  | TALGYLIQKA  | NA | NA |
| 21  | 44  | TALGYLRQKT  | NA | NA |
| 60  | 81  | TALGYLRGHL  | NA | NA |
| 44  | 35  | TALGYLIMAQ  | NA | NA |
| 18  | 28  | TALGYLIVVW  | NA | NA |
| 45  | 54  | TALGYLRMSH  | NA | NA |
| 70  | 75  | HLPTALVYGG  | NA | NA |
| 33  | 36  | HLPTALLDEH  | NA | NA |
| 69  | 88  | HLPTALVMLG  | NA | NA |
| 46  | 58  | HLPTALIGEL  | NA | NA |
| 91  | 121 | HLPTALRDAH  | NA | NA |
| 89  | 123 | HLPTALKSGA  | NA | NA |
| 132 | 155 | HLPTALSAGK  | NA | NA |
| 25  | 50  | HLPTALKKET  | NA | NA |
| 42  | 41  | VMIRNLIYWN  | NA | NA |
| 29  | 42  | TVPSWLSDQY  | NA | NA |
| 100 | 101 | AVPSWLSGLR  | NA | NA |
| 56  | 43  | MVPSWLS SMA | NA | NA |
| 84  | 91  | VVPSWLSK WY | NA | NA |
| 77  | 108 | LVPSWLSRNL  | NA | NA |
| 54  | 68  | WVPSWLSGLT  | NA | NA |
| 45  | 52  | DVPSWLSQTY  | NA | NA |
| 71  | 81  | FVPSWLSYLI  | NA | NA |
| 117 | 175 | HVPSWLSRSH  | NA | NA |
| 97  | 124 | GVPSWLSGRR  | NA | NA |
| 30  | 33  | RVLSRLKGT V | NA | NA |
| 8   | 14  | VSISFLYAVT  | NA | NA |
| 7   | 17  | VSISFLFGIA  | NA | NA |
| 35  | 36  | VSISFLSSGK  | NA | NA |
| 18  | 11  | VSISFLYVRR  | NA | NA |
| 25  | 29  | VSISFLAQQK  | NA | NA |
| 35  | 46  | VSISFLKSQI  | NA | NA |
| 42  | 44  | LTVVALIAND  | NA | NA |
| 34  | 41  | MKPVNLLQAG  | NA | NA |
| 63  | 88  | MKPVNLSMNV  | NA | NA |
| 59  | 64  | MKPVNLIQQW  | NA | NA |
| 50  | 57  | NIMSSLKFQK  | NA | NA |
| 80  | 89  | TDMSSLKFWG  | NA | NA |
| 29  | 35  | WTMSSLKFII  | NA | NA |

|     |     |             |    |    |
|-----|-----|-------------|----|----|
| 94  | 112 | MMSSSLKFRS  | NA | NA |
| 67  | 68  | HQMSSSLKFVS | NA | NA |
| 51  | 56  | GWSSSLKFGS  | NA | NA |
| 41  | 36  | WNSSSLKFLV  | NA | NA |
| 27  | 35  | YSMSSSLKFMI | NA | NA |
| 4   | 3   | AWMSSSLKFL  | NA | NA |
| 47  | 73  | TPVGWMKYEG  | NA | NA |
| 44  | 55  | TPVGWMFRIG  | NA | NA |
| 44  | 33  | TPVGWMFVGI  | NA | NA |
| 27  | 34  | TPVGWMISWR  | NA | NA |
| 43  | 53  | CAPSSSLRVGG | NA | NA |
| 87  | 110 | WAPSSSLRLAT | NA | NA |
| 38  | 40  | EAPSSSLRMNW | NA | NA |
| 14  | 17  | TAPSSSLRKSG | NA | NA |
| 31  | 31  | IAPSSSLRNGS | NA | NA |
| 23  | 29  | HAPSSSLRKNS | NA | NA |
| 126 | 159 | IAPSSSLRLGY | NA | NA |
| 29  | 50  | IAPSSSLRMKA | NA | NA |
| 42  | 62  | WAPSSSLRQEG | NA | NA |
| 61  | 64  | NRIGNFVSWY  | NA | NA |
| 50  | 38  | NRIGNFMMLA  | NA | NA |
| 36  | 34  | NRIGNFADNT  | NA | NA |
| 19  | 32  | NRIGNFSRVG  | NA | NA |
| 37  | 34  | NRIGNFLKGW  | NA | NA |
| 48  | 79  | NRIGNFSVRY  | NA | NA |
| 63  | 67  | NRIGNFRRVG  | NA | NA |
| 48  | 41  | NRIGNFTDEV  | NA | NA |
| 29  | 35  | NRIGNFWRPQ  | NA | NA |
| 28  | 44  | QSPVQLLSMT  | NA | NA |
| 40  | 59  | TAPINLIVGK  | NA | NA |
| 74  | 80  | KYPRRLVVRL  | NA | NA |
| 29  | 49  | TPIAKLIVRR  | NA | NA |
| 75  | 94  | EKVAKLIVRR  | NA | NA |
| 87  | 95  | KPHAKLIVRV  | NA | NA |
| 42  | 49  | YTPAKLIVRA  | NA | NA |
| 60  | 65  | WDVAKLIVRK  | NA | NA |
| 15  | 28  | YAPGSMTGRQ  | NA | NA |
| 39  | 43  | YAPGSMKGWQ  | NA | NA |
| 27  | 33  | YAPGSMVQWL  | NA | NA |
| 18  | 27  | YAPGSMAGEH  | NA | NA |
| 44  | 46  | YAPGSMRQLA  | NA | NA |

|     |     |               |    |
|-----|-----|---------------|----|
| 1   | 7   | YAPGSMYQTY NA | NA |
| 9   | 8   | YAPGSMYAKA NA | NA |
| 24  | 17  | YAPGSMVRTS NA | NA |
| 34  | 31  | YAPGSMVQTA NA | NA |
| 41  | 55  | RNLASLMDEG NA | NA |
| 70  | 84  | RNLASLAKGW NA | NA |
| 99  | 91  | RNLASLFKWA NA | NA |
| 44  | 30  | RNLASLIGRT NA | NA |
| 33  | 34  | RNLASLIMSY NA | NA |
| 42  | 35  | RNLASLIGSK NA | NA |
| 60  | 85  | RNLASLRDHV NA | NA |
| 35  | 42  | EQLANMIGRQ NA | NA |
| 28  | 44  | EQLANMSDGG NA | NA |
| 72  | 79  | EQLANMKRQG NA | NA |
| 43  | 78  | EQLANMLVIQ NA | NA |
| 55  | 69  | MVPSALVGGY NA | NA |
| 65  | 74  | MVPSALMNQI NA | NA |
| 35  | 40  | MVPSALFGKR NA | NA |
| 67  | 76  | MVPSALLDKW NA | NA |
| 56  | 61  | MVPSALFGQF NA | NA |
| 61  | 72  | MVPSALYGPH NA | NA |
| 41  | 60  | MVPSALFNMS NA | NA |
| 37  | 43  | MVPSALYSPK NA | NA |
| 88  | 95  | MVPSALFQGV NA | NA |
| 37  | 38  | PGIANLIVSK NA | NA |
| 38  | 27  | PGIANLSSGI NA | NA |
| 39  | 46  | PGIANLISMK NA | NA |
| 21  | 44  | PGIANLMVVY NA | NA |
| 104 | 113 | PGIANLKYHG NA | NA |
| 25  | 29  | RRPASMSDEY NA | NA |
| 29  | 51  | RRPASMAGHY NA | NA |
| 22  | 39  | RRPASMSYPT NA | NA |
| 21  | 34  | RRPASMLLKG NA | NA |
| 24  | 31  | RRPASMIRVH NA | NA |
| 44  | 63  | RRPASMFYPR NA | NA |
| 62  | 73  | RRPASMRRMG NA | NA |
| 18  | 19  | RRPASMFSLG NA | NA |
| 111 | 173 | RRPASMRLSW NA | NA |
| 26  | 18  | NKPSSLLGTS NA | NA |
| 14  | 18  | NAPSSLLGSG NA | NA |
| 39  | 57  | TTPSSLLGHA NA | NA |

|     |                   |    |
|-----|-------------------|----|
| 37  | 53 IIPSSLLGAV NA  | NA |
| 30  | 31 RSPSSLLGWL NA  | NA |
| 14  | 18 QPPSSLLGTH NA  | NA |
| 25  | 26 HFPSSLLGPW NA  | NA |
| 34  | 39 CTPSSLLGTQ NA  | NA |
| 20  | 27 FHPSSLLGLF NA  | NA |
| 43  | 50 ATPSSLLGGW NA  | NA |
| 63  | 63 FHIAHLVLSW NA  | NA |
| 36  | 31 FHIAHLIAWW NA  | NA |
| 138 | 176 FHIAHLSMVV NA | NA |
| 34  | 53 HHPAALFDKF NA  | NA |
| 90  | 123 HHPAALYLHK NA | NA |
| 295 | 333 HHPAALMAWK NA | NA |
| 40  | 48 HHPAALFGGQ NA  | NA |
| 156 | 224 HHPAALKLMF NA | NA |
| 71  | 74 HHPAALYYIS NA  | NA |
| 29  | 31 TVLRSLIGPV NA  | NA |
| 13  | 11 TVLRSLKDSH NA  | NA |
| 35  | 39 RYPVNMIMWA NA  | NA |
| 41  | 62 RYPVNMLKHK NA  | NA |
| 18  | 20 RYPVNMSSQY NA  | NA |
| 108 | 167 NRPSALYLKW NA | NA |
| 50  | 52 NRPSALISVQ NA  | NA |
| 80  | 67 NRPSALKQGV NA  | NA |
| 30  | 41 NRPSALVSSY NA  | NA |
| 57  | 75 NRPSALSRIQ NA  | NA |
| 93  | 117 NRPSALMYGH NA | NA |
| 29  | 21 NRPSALASSR NA  | NA |
| 41  | 55 PSPRAIKYRI NA  | NA |
| 80  | 84 VQLRSLKDRL NA  | NA |
| 31  | 40 VQLRSLVSGK NA  | NA |
| 7   | 16 VQLRSLILKF NA  | NA |
| 26  | 28 VQLRSLVNNV NA  | NA |
| 40  | 53 GKPLPWIYRI NA  | NA |
| 34  | 52 GKPLPWVKGK NA  | NA |
| 18  | 20 GKPLPWKYVK NA  | NA |
| 42  | 22 GKPLPWNTH NA   | NA |
| 19  | 23 QVPVFLSLKG NA  | NA |
| 59  | 71 QVPVFLKGNK NA  | NA |
| 14  | 15 QVPVFLSSHI NA  | NA |
| 62  | 64 IQLAWLSQNV NA  | NA |

|     |                   |    |
|-----|-------------------|----|
| 73  | 84 IQLAWLSMTW NA  | NA |
| 58  | 82 IQLAWLKKNW NA  | NA |
| 67  | 87 IQLAWLRYQG NA  | NA |
| 37  | 41 IQLAWLRGIT NA  | NA |
| 44  | 54 IQLAWLFKKG NA  | NA |
| 38  | 25 IQLAWLLLTF NA  | NA |
| 22  | 24 AIIAWLKKIS NA  | NA |
| 24  | 32 YLPRAIKYWS NA  | NA |
| 63  | 62 YLPRAIKLAV NA  | NA |
| 53  | 76 SDIRWLINLI NA  | NA |
| 53  | 37 SDIRWLVVMG NA  | NA |
| 106 | 144 SDIRWLVYEK NA | NA |
| 31  | 37 RGPVFLKSES NA  | NA |
| 21  | 31 RGPVFLKMIL NA  | NA |
| 43  | 46 CLLASLAYML NA  | NA |
| 30  | 50 CLLASLMLIT NA  | NA |
| 101 | 102 CLLASLSLLR NA | NA |
| 44  | 39 CLLASLSYSY NA  | NA |
| 67  | 66 CLLASLKMPF NA  | NA |
| 38  | 40 KVLASLIVEH NA  | NA |
| 18  | 25 KVLASLANWF NA  | NA |
| 27  | 37 KVLASLIQQW NA  | NA |
| 93  | 115 KVLASLMRQY NA | NA |
| 141 | 167 KVLASLKNRL NA | NA |
| 28  | 31 KVLASLKYSK NA  | NA |
| 57  | 89 FKFATLVRNQ NA  | NA |
| 60  | 108 VKFATLVVLL NA | NA |
| 70  | 71 HKFATLVNPA NA  | NA |
| 92  | 122 EKFATLVGHQ NA | NA |
| 10  | 12 GKFATLVASS NA  | NA |
| 49  | 73 QKFATLVMGH NA  | NA |
| 78  | 104 MKFATLVGGT NA | NA |
| 57  | 85 QKFATLVNHI NA  | NA |
| 103 | 124 FKFATLVGEH NA | NA |
| 63  | 64 CKFATLVQIQ NA  | NA |
| 40  | 64 RKFATLVNLG NA  | NA |
| 55  | 43 LDFIAYTMVA NA  | NA |
| 19  | 22 LAPGAYTMVA NA  | NA |
| 39  | 26 WPISAYTMVA NA  | NA |
| 29  | 27 KSPAYLSGRG NA  | NA |
| 16  | 16 KSPAYLIRET NA  | NA |

|     |     |               |    |
|-----|-----|---------------|----|
| 18  | 23  | KSPAYLMDPK NA | NA |
| 42  | 62  | KSPAYLFAGQ NA | NA |
| 29  | 39  | KSPAYLLGGS NA | NA |
| 10  | 18  | KSPAYLALEF NA | NA |
| 20  | 11  | KSPAYLFANS NA | NA |
| 15  | 41  | KSPAYLIGAI NA | NA |
| 32  | 30  | TRMALLKATA NA | NA |
| 69  | 56  | TRMALLKGPQ NA | NA |
| 10  | 15  | MAPSDLKSKY NA | NA |
| 29  | 37  | ASISDLKSKV NA | NA |
| 18  | 13  | ESPSFLFSQS NA | NA |
| 20  | 35  | ESPSFLSVPW NA | NA |
| 8   | 15  | ESPSFLASII NA | NA |
| 32  | 37  | ESPSFLSNVT NA | NA |
| 24  | 31  | ESPSFLADNT NA | NA |
| 29  | 28  | ESPSFLSKGT NA | NA |
| 56  | 68  | FPIRRLKWNL NA | NA |
| 103 | 124 | PSPRYLKSRR NA | NA |
| 48  | 57  | PSPRYLKQIR NA | NA |
| 32  | 43  | PSPRYLKDFW NA | NA |
| 43  | 59  | VAISRLKLLF NA | NA |
| 50  | 67  | VAISRLRDLR NA | NA |
| 63  | 68  | ITMAQLRREY NA | NA |
| 54  | 48  | GSLARLSMVI NA | NA |
| 86  | 115 | FNLARLSMNH NA | NA |
| 69  | 62  | TMLARLSMPI NA | NA |
| 123 | 191 | GHLARLSMLY NA | NA |
| 153 | 211 | HILARLSMHK NA | NA |
| 61  | 86  | GNLARLSMRG NA | NA |
| 58  | 87  | IQLARLSMES NA | NA |
| 48  | 54  | EPLARLSMGR NA | NA |
| 64  | 109 | KFLARLSMGQ NA | NA |
| 64  | 82  | EMLARLSMTG NA | NA |
| 51  | 57  | PTIRFLVAKA NA | NA |
| 13  | 16  | GTPSKLYKVS NA | NA |
| 47  | 48  | STPSKLYQKF NA | NA |
| 18  | 15  | NTPSKLYGPT NA | NA |
| 27  | 35  | HTPSKLYLNI NA | NA |
| 54  | 64  | ITPSKLYVRV NA | NA |
| 40  | 58  | MTPSKLYMSL NA | NA |
| 40  | 47  | GTPSKLYASR NA | NA |

|     |     |               |    |
|-----|-----|---------------|----|
| 36  | 37  | LTPSKLYGLQ NA | NA |
| 47  | 70  | GTPSKLYGMV NA | NA |
| 60  | 58  | HTPSKLYAGQ NA | NA |
| 27  | 26  | LTPSKLYDQS NA | NA |
| 43  | 46  | GIPSRILMGY NA | NA |
| 31  | 41  | TNPSRILMIG NA | NA |
| 80  | 92  | CHPSRILMLR NA | NA |
| 30  | 32  | VRPSRILMLT NA | NA |
| 22  | 46  | GMPSRILMIF NA | NA |
| 39  | 33  | NDPSRILMAQ NA | NA |
| 52  | 47  | MHPSRILMVA NA | NA |
| 34  | 27  | GAPSRILMMA NA | NA |
| 49  | 73  | SNPSRILMWA NA | NA |
| 63  | 78  | KIPSRILMSW NA | NA |
| 47  | 48  | LTLAQISYKQ NA | NA |
| 28  | 29  | ITLAQISLRG NA | NA |
| 24  | 25  | NTLAQISDTG NA | NA |
| 31  | 28  | QTLAQISSPH NA | NA |
| 12  | 12  | ETLAQISRSG NA | NA |
| 44  | 37  | KTLAQISAIG NA | NA |
| 16  | 21  | VTLAQISLMH NA | NA |
| 39  | 58  | DTLAQISSAW NA | NA |
| 59  | 59  | ETLAQISQRF NA | NA |
| 34  | 41  | PTLAQISGVY NA | NA |
| 21  | 12  | TTLAQISQMH NA | NA |
| 32  | 38  | RWPAWLMQPV NA | NA |
| 106 | 133 | RWPAWLIATH NA | NA |
| 58  | 93  | RWPAWLMRGK NA | NA |
| 33  | 37  | RWPAWLMDVF NA | NA |
| 2   | 5   | KAPLKLKKVY NA | NA |
| 38  | 42  | YSPSLIISGT NA | NA |
| 89  | 118 | KPVSALKLPF NA | NA |
| 41  | 70  | KPVSALIGWF NA | NA |
| 76  | 87  | KPVSALSRGI NA | NA |
| 197 | 347 | PFHARLRLAI NA | NA |
| 64  | 57  | LEIASLSAWA NA | NA |
| 49  | 61  | LEIASLSATL NA | NA |
| 47  | 51  | LEIASLSYGF NA | NA |
| 33  | 42  | CEIASLSDMS NA | NA |
| 114 | 129 | YEIASLSYHI NA | NA |
| 99  | 102 | AEIASLSMMW NA | NA |

|     |     |               |    |
|-----|-----|---------------|----|
| 46  | 55  | GEIASLSYIW NA | NA |
| 156 | 197 | CEIASLSRWG NA | NA |
| 36  | 48  | FEIASLSDGR NA | NA |
| 99  | 135 | HEIASLSMWL NA | NA |
| 160 | 212 | YKPVYYHREY NA | NA |
| 18  | 18  | SSPLNYTGGY NA | NA |
| 1   | 5   | RAPLPVARAF NA | NA |
| 54  | 63  | RAPLPVHVKS NA | NA |
| 24  | 35  | RAPLPVYLAG NA | NA |
| 21  | 20  | RAPLPVQNES NA | NA |
| 27  | 26  | RAPLPVRAEG NA | NA |
| 42  | 43  | RAPLPVFGGK NA | NA |
| 29  | 34  | RAPLPVYANH NA | NA |
| 16  | 22  | RAPLPVRVKH NA | NA |
| 15  | 22  | RAPLPVYLNA NA | NA |
| 97  | 100 | SRPVYLVHVL NA | NA |
| 50  | 55  | SRPVYLWKVY NA | NA |
| 33  | 35  | VDVSFLWGEI NA | NA |
| 36  | 53  | VDVSFLWDWG NA | NA |
| 52  | 72  | HVVAKMWLGF NA | NA |
| 64  | 69  | HVVAKMHMAR NA | NA |
| 17  | 22  | GVPRAVALQV NA | NA |
| 25  | 19  | GVPRAVAQLI NA | NA |
| 24  | 38  | GVPRAVLVII NA | NA |
| 33  | 26  | GVPRAVSGWT NA | NA |
| 28  | 40  | GVPRAVMVGF NA | NA |
| 28  | 15  | GVPRAVIMKH NA | NA |
| 38  | 48  | GVPRAVHYEL NA | NA |
| 43  | 49  | GVPRAVRGNH NA | NA |
| 29  | 65  | SYPRAYFLGL NA | NA |
| 40  | 44  | SYPRAYISKF NA | NA |
| 94  | 92  | SYPRAYVAAK NA | NA |
| 62  | 76  | SYPRAYWAGI NA | NA |
| 63  | 91  | SYPRAYMQQK NA | NA |
| 42  | 43  | SYPRAYLAIR NA | NA |
| 38  | 33  | SYPRAYVAII NA | NA |
| 34  | 38  | SYPRAYRDES NA | NA |
| 45  | 44  | SYPRAYAKSH NA | NA |
| 27  | 57  | EFPRNLAVNY NA | NA |
| 77  | 114 | GHPRNLAVHK NA | NA |
| 63  | 77  | IAPRNLAVKK NA | NA |



|     |     |               |    |
|-----|-----|---------------|----|
| 19  | 25  | TIPRNLAVAV NA | NA |
| 45  | 46  | LAPRNLAVMY NA | NA |
| 58  | 78  | VQPRNLAVNK NA | NA |
| 20  | 24  | SPPRNLAVVT NA | NA |
| 49  | 44  | PRPRNLAVAK NA | NA |
| 27  | 39  | HPPRNLAVPI NA | NA |
| 40  | 40  | FSPRNLAVTK NA | NA |
| 44  | 48  | GQPRNLAVTR NA | NA |
| 38  | 47  | SVPSAIWNPR NA | NA |
| 33  | 52  | SVPSAIHKNG NA | NA |
| 46  | 48  | RRPVAYFNLA NA | NA |
| 30  | 41  | RRPVAYTVKK NA | NA |
| 39  | 53  | RRPVAYQLGI NA | NA |
| 36  | 35  | RRPVAYYDQG NA | NA |
| 57  | 57  | RRPVAYRQRQ NA | NA |
| 53  | 51  | RRPVAYANRF NA | NA |
| 40  | 53  | RRPVAYQLRA NA | NA |
| 101 | 80  | VKPSKLWYLI NA | NA |
| 103 | 150 | VKPSKLHGWI NA | NA |
| 32  | 42  | NAPNALHLEY NA | NA |
| 35  | 58  | RFPRAFRGHH NA | NA |
| 39  | 47  | GFPRAFRMKK NA | NA |
| 53  | 57  | AFPRAFRKNG NA | NA |
| 32  | 37  | FFPRAFRGPY NA | NA |
| 32  | 38  | GFPRAFRAGH NA | NA |
| 24  | 41  | QFPRAFRKWK NA | NA |
| 35  | 42  | RFPRAFRKTH NA | NA |
| 48  | 36  | AFPRAFRLAG NA | NA |
| 71  | 92  | KFPRAFRLEL NA | NA |
| 52  | 63  | SFPRAFRQQH NA | NA |
| 41  | 67  | HAPSLYHSNR NA | NA |
| 55  | 71  | NRPSVWKNW NA  | NA |
| 74  | 78  | NRPSVWTLII NA | NA |
| 246 | 304 | NRPSVWHYGH NA | NA |
| 104 | 125 | NRPSVWVMRR NA | NA |
| 70  | 103 | NRPSVWHLLY NA | NA |
| 102 | 126 | FMPRAYRAGW NA | NA |
| 90  | 96  | YMPRAYRRHL NA | NA |
| 83  | 82  | KMPRAYRMGH NA | NA |
| 88  | 104 | SMPRAYRGAQ NA | NA |
| 36  | 40  | HMPRAYRSMY NA | NA |

|     |     |            |    |    |
|-----|-----|------------|----|----|
| 85  | 119 | AMPRAYRMWW | NA | NA |
| 91  | 95  | YMPRAYRLKQ | NA | NA |
| 76  | 86  | IMPRAYRGSR | NA | NA |
| 59  | 81  | TMPRAYRQGI | NA | NA |
| 68  | 92  | MMPRAYRGSR | NA | NA |
| 15  | 26  | AMPKHLAQAG | NA | NA |
| 43  | 48  | AMPKHLASI  | NA | NA |
| 86  | 93  | AMPKHLRQIV | NA | NA |
| 46  | 53  | AMPKHLAQAI | NA | NA |
| 30  | 56  | AMPKHLVSRI | NA | NA |
| 77  | 80  | AMPKHLTMQR | NA | NA |
| 113 | 142 | AMPKHLIYIW | NA | NA |
| 82  | 99  | AMPKHLVDWW | NA | NA |
| 69  | 91  | AMPKHLVSI  | NA | NA |
| 20  | 26  | CAPTALQNPQ | NA | NA |
| 24  | 32  | CAPTALQSKR | NA | NA |
| 108 | 131 | CAPTALHAMQ | NA | NA |
| 71  | 76  | PCPTGLTAIH | NA | NA |
| 28  | 31  | PCPTGLTGIS | NA | NA |
| 70  | 69  | PCPTGLTAVI | NA | NA |
| 79  | 101 | PCPTGLVGNH | NA | NA |
| 246 | 292 | WYPSKLWRRW | NA | NA |
| 28  | 32  | ASPRGMKTTH | NA | NA |
| 63  | 96  | IWPRGMKTGQ | NA | NA |
| 39  | 56  | ISPRGMKTHH | NA | NA |
| 41  | 47  | TNPRGMKTKA | NA | NA |
| 53  | 68  | IWPRGMKTKR | NA | NA |
| 82  | 106 | KFPRGMKTMW | NA | NA |
| 47  | 51  | AFPRGMKTGL | NA | NA |
| 67  | 77  | QWPRGMKTNL | NA | NA |
| 40  | 53  | DYPRGMKTGV | NA | NA |
| 43  | 60  | FHPRGMKTAK | NA | NA |
| 116 | 126 | FKAVALHAVL | NA | NA |
| 46  | 61  | FKAVALTKIY | NA | NA |
| 66  | 88  | FKAVALHDMG | NA | NA |
| 30  | 31  | KSPTGLVAGQ | NA | NA |
| 8   | 9   | KSPTGLTDKR | NA | NA |
| 6   | 13  | QTPRAVSAMR | NA | NA |
| 46  | 64  | KKPRAVSAMI | NA | NA |
| 35  | 31  | PNPRAVSAGG | NA | NA |
| 31  | 33  | VDPRAVSAKG | NA | NA |

|     |                   |    |
|-----|-------------------|----|
| 33  | 35 SHPRAVSALI NA  | NA |
| 38  | 46 VRPRAVSAHS NA  | NA |
| 18  | 16 GPPRAVSALK NA  | NA |
| 37  | 48 GKPRAVSAIH NA  | NA |
| 12  | 12 LMPRAVSAPR NA  | NA |
| 34  | 31 PTPRSYANIT NA  | NA |
| 14  | 12 PTPRSYYSKG NA  | NA |
| 37  | 50 PTPRSYFMES NA  | NA |
| 138 | 152 PTPRSYHMVG NA | NA |
| 59  | 65 PTPRSYTKRG NA  | NA |
| 31  | 54 PTPRSYALRY NA  | NA |
| 63  | 63 PTPRSYQGSQ NA  | NA |
| 50  | 64 PTPRSYHNTS NA  | NA |
| 26  | 51 PTPRSYLMNR NA  | NA |
| 24  | 46 TPPVELWGEV NA  | NA |
| 49  | 51 TPPVELHNMR NA  | NA |
| 33  | 43 TPPVELWDNR NA  | NA |
| 47  | 45 QVPRRLYAPG NA  | NA |
| 34  | 35 QVPRRLYKNF NA  | NA |
| 67  | 75 QVPRRLHKTR NA  | NA |
| 17  | 14 QVPRRLTKAH NA  | NA |
| 114 | 105 QVPRRLWQEF NA | NA |
| 64  | 71 QVPRRLHNVG NA  | NA |
| 73  | 91 QVPRRLYKGI NA  | NA |
| 59  | 60 SRPRTLHGPK NA  | NA |
| 38  | 52 SRPRTLYYNY NA  | NA |
| 13  | 16 RAPVAFHVEK NA  | NA |
| 8   | 21 RAPVAFQQNF NA  | NA |
| 32  | 32 RAPVAFHSNF NA  | NA |
| 7   | 13 RAPVAFHDPG NA  | NA |
| 31  | 34 QRVAAVHMML NA  | NA |
| 11  | 20 QRVAAVQQLH NA  | NA |
| 56  | 72 QRVAAVHQAV NA  | NA |
| 31  | 38 QRVAAVWGEA NA  | NA |
| 70  | 69 QRVAAVYQAW NA  | NA |
| 80  | 72 QRVAAVHKTH NA  | NA |
| 22  | 27 QRVAAVQAMT NA  | NA |
| 42  | 57 IGVRALVRAS NA  | NA |
| 42  | 46 IGVRALVQSG NA  | NA |
| 66  | 55 IGVRALMRVR NA  | NA |
| 37  | 46 IGVRALFDEA NA  | NA |

|     |     |             |    |    |
|-----|-----|-------------|----|----|
| 59  | 52  | IGVRALRGTS  | NA | NA |
| 12  | 21  | IGVRALIQEK  | NA | NA |
| 66  | 80  | MIPVAMTKIH  | NA | NA |
| 57  | 77  | TTPVAMTKPH  | NA | NA |
| 12  | 14  | TSPVAMTKNG  | NA | NA |
| 32  | 47  | YNPVAMTKPI  | NA | NA |
| 30  | 40  | GKPVAMTKML  | NA | NA |
| 11  | 30  | TRPVAMTKWF  | NA | NA |
| 53  | 81  | YWPVAMTKAA  | NA | NA |
| 51  | 68  | HNPVAMTKSK  | NA | NA |
| 16  | 29  | YDPVAMTKLI  | NA | NA |
| 41  | 46  | QQPRNLTVKT  | NA | NA |
| 72  | 99  | MFVRKLIYVS  | NA | NA |
| 52  | 54  | MFVRKLFMGW  | NA | NA |
| 90  | 112 | MFVRKLLHQQS | NA | NA |
| 143 | 167 | MFVRKLLSMQI | NA | NA |
| 106 | 128 | MFVRKLLDHA  | NA | NA |
| 92  | 85  | MFVRKLQQVQ  | NA | NA |
| 62  | 82  | MFVRKLQDQQ  | NA | NA |
| 80  | 90  | MFVRKLHDAR  | NA | NA |
| 42  | 40  | MFVRKLLKGMG | NA | NA |
| 115 | 135 | MFVRKLLQSVL | NA | NA |
| 47  | 60  | VMPSGFQAVR  | NA | NA |
| 31  | 48  | VMPSGFQAVR  | NA | NA |
| 47  | 42  | KGPSGLTKKV  | NA | NA |
| 25  | 37  | KGPSGLYKTT  | NA | NA |
| 61  | 50  | KGPSGLWQTQ  | NA | NA |
| 31  | 45  | SGPKLLIMWG  | NA | NA |
| 40  | 48  | SGPKLLSSMW  | NA | NA |
| 36  | 41  | SGPKLLFQIY  | NA | NA |
| 33  | 34  | SGPKLLYMIT  | NA | NA |
| 57  | 59  | SGPKLLAAMV  | NA | NA |
| 36  | 44  | SGPKLLFVIV  | NA | NA |
| 46  | 43  | SGPKLLAGGI  | NA | NA |
| 54  | 71  | SGPKLLAGTL  | NA | NA |
| 26  | 30  | SGPKLLIKTR  | NA | NA |
| 27  | 32  | SGPKLLHVQL  | NA | NA |
| 41  | 40  | SGPKLLKGIA  | NA | NA |
| 83  | 78  | HYVRAHLDSQ  | NA | NA |
| 199 | 199 | HYVRAHWYGG  | NA | NA |
| 81  | 94  | HYVRAHQGRL  | NA | NA |

|     |     |                |    |
|-----|-----|----------------|----|
| 118 | 157 | HYVRAHRQSL NA  | NA |
| 15  | 31  | HYVRAHTNVV NA  | NA |
| 96  | 105 | HYVRAHWLGR NA  | NA |
| 127 | 153 | HYVRAHAMGH NA  | NA |
| 12  | 23  | HYVRAHYGQF NA  | NA |
| 32  | 40  | HYVRAHSLKH NA  | NA |
| 63  | 102 | MGPWF MAGSW NA | NA |
| 90  | 151 | MGPWF MASTH NA | NA |
| 91  | 118 | HTVRNVIDHY NA  | NA |
| 44  | 54  | HTVRNV RMTT NA | NA |
| 46  | 55  | HTVRNV VAKI NA | NA |
| 104 | 132 | HTVRNV RMTT NA | NA |
| 91  | 106 | HTVRNV KRAH NA | NA |
| 15  | 15  | HTVRNV SSIT NA | NA |
| 56  | 73  | HTVRNV FYIT NA | NA |
| 49  | 67  | HTVRNV FKLA NA | NA |
| 56  | 60  | AYVKW LMSLT NA | NA |
| 53  | 54  | SDVKW LMSGK NA | NA |
| 90  | 122 | THVKW LMSNW NA | NA |
| 43  | 44  | FSVKW LMSHV NA | NA |
| 34  | 54  | PHVKW LMSML NA | NA |
| 105 | 130 | QFVKW LMSKQ NA | NA |
| 45  | 37  | QSVKW LMSTI NA | NA |
| 44  | 47  | RHVKW LMSLF NA | NA |
| 89  | 121 | MNVKW LMSEK NA | NA |
| 80  | 87  | SYVKW LMSEK NA | NA |
| 43  | 57  | GRVKW LMSSK NA | NA |
| 102 | 102 | KIPSA LWLGQ NA | NA |
| 37  | 56  | LIPAWL WGGW NA | NA |
| 47  | 32  | LIPAWL HQEG NA | NA |
| 64  | 56  | LIPAWL WNMG NA | NA |
| 30  | 39  | LIPAWL HAGS NA | NA |
| 14  | 22  | LIPAWL WRGG NA | NA |
| 26  | 24  | YFPKLL YGET NA | NA |
| 84  | 97  | LMPKLL YGPW NA | NA |
| 47  | 38  | GTPKLL YGRI NA | NA |
| 15  | 18  | KFPKLL YGLG NA | NA |
| 171 | 174 | SNPKLL YGRW NA | NA |
| 55  | 77  | SKPKLL YGNI NA | NA |
| 25  | 22  | LPPKLL YGMG NA | NA |
| 16  | 18  | TRPKLL YGPT NA | NA |

|     |                    |    |
|-----|--------------------|----|
| 43  | 35 DPPKLLYGQL NA   | NA |
| 192 | 235 QKPRNYHGAQ NA  | NA |
| 192 | 199 QYPRNYHGTA NA  | NA |
| 98  | 87 GDPRNYHGIR NA   | NA |
| 112 | 158 RNPRNYHGGA NA  | NA |
| 143 | 139 IPPRNYHGPA NA  | NA |
| 135 | 179 CWPRNYHGTV NA  | NA |
| 163 | 211 LI PRNYHGTW NA | NA |
| 137 | 201 FQPRNYHGKI NA  | NA |
| 311 | 361 IFPRNYHGMQ NA  | NA |
| 17  | 14 TKPRNYHGPF NA   | NA |
| 366 | 422 YPPRNYHGWV NA  | NA |
| 39  | 52 TIPKQLRVKK NA   | NA |
| 31  | 52 EDPKQLRVSI NA   | NA |
| 70  | 69 THPKQLRVIA NA   | NA |
| 27  | 42 NDPKQLRVKK NA   | NA |
| 85  | 113 YNPKQLRVGQ NA  | NA |
| 77  | 83 VMPKQLRVGT NA   | NA |
| 46  | 49 VQPKQLRVKI NA   | NA |
| 46  | 79 APPKQLRVKL NA   | NA |
| 67  | 82 AHPSALWAQK NA   | NA |
| 29  | 30 AHPSALQKTT NA   | NA |
| 90  | 104 TSPRNLRYAF NA  | NA |
| 65  | 73 CSPRNLRDNQ NA   | NA |
| 72  | 86 YSPRNLRKMH NA   | NA |
| 33  | 43 MSPRNLRDGG NA   | NA |
| 29  | 44 DSPRNLRNNT NA   | NA |
| 67  | 80 RSPRNLRAGW NA   | NA |
| 31  | 42 FSPRNLRQPF NA   | NA |
| 32  | 45 TSPRNLRVLQ NA   | NA |
| 35  | 44 DSPRNLRVNV NA   | NA |
| 156 | 196 CSPRNLRRGK NA  | NA |
| 39  | 51 ESPRNLRKLV NA   | NA |
| 64  | 67 HRPEWYLYWY NA   | NA |
| 105 | 93 HRPEWYLMWG NA   | NA |
| 107 | 134 HRPEWYRAAQ NA  | NA |
| 96  | 124 HRPEWYHGTT NA  | NA |
| 47  | 37 HRPEWYKDNA NA   | NA |
| 49  | 66 HRPEWYMYKA NA   | NA |
| 79  | 93 HRPEWYRGKW NA   | NA |
| 25  | 22 HRPEWYYSLG NA   | NA |

|     |     |               |    |
|-----|-----|---------------|----|
| 55  | 68  | HRPEWYLDGV NA | NA |
| 108 | 131 | HRPEWYRSTW NA | NA |
| 37  | 46  | MSPKGVVDMR NA | NA |
| 30  | 30  | MSPKGVTDIY NA | NA |
| 63  | 78  | MSPKGVLMEL NA | NA |
| 53  | 59  | MSPKGVLGHA NA | NA |
| 31  | 39  | MSPKGVQGKS NA | NA |
| 38  | 40  | MSPKGVSQSV NA | NA |
| 30  | 32  | MSPKGVSDET NA | NA |
| 33  | 31  | MSPKGVQDSS NA | NA |
| 79  | 89  | MSPKGVRRRV NA | NA |
| 31  | 38  | GMVRGVRGWI NA | NA |
| 50  | 63  | GMVRGVSVHY NA | NA |
| 61  | 64  | GMVRGVHNRG NA | NA |
| 26  | 43  | GMVRGVVKAK NA | NA |
| 42  | 57  | GMVRGVTOGH NA | NA |
| 39  | 56  | GMVRGVVSGW NA | NA |
| 45  | 57  | GMVRGVTDRA NA | NA |
| 29  | 41  | GMVRGVVMWI NA | NA |
| 30  | 29  | GMVRGVQOTT NA | NA |
| 116 | 158 | TIPSWSQYIH NA | NA |
| 40  | 42  | TIPSWSLQAF NA | NA |
| 51  | 71  | TIPSWSMGKQ NA | NA |
| 61  | 63  | TIPSWSIRGH NA | NA |
| 27  | 33  | TIPSWSRSPY NA | NA |
| 80  | 90  | TIPSWSHKGG NA | NA |
| 58  | 55  | TIPSWSHMSA NA | NA |
| 66  | 74  | TIPSWSWYAG NA | NA |
| 41  | 47  | TIPSWSQYSG NA | NA |
| 184 | 213 | TIPSWSMYHG NA | NA |
| 73  | 108 | WQWRAYTGMF NA | NA |
| 46  | 49  | KIWRAYTGMK NA | NA |
| 31  | 33  | VPWRAYTGEI NA | NA |
| 169 | 241 | MMWRAYTGWS NA | NA |
| 84  | 111 | MFWRAYTGTF NA | NA |
| 32  | 34  | AQWRAYTGPG NA | NA |
| 51  | 80  | KRWRAYTGEG NA | NA |
| 51  | 83  | FMWRAYTGGR NA | NA |
| 62  | 74  | CMWRAYTGGW NA | NA |
| 42  | 38  | VFWRAYTGWW NA | NA |
| 51  | 58  | IMWRAYTGTF NA | NA |

|    |     |             |    |    |
|----|-----|-------------|----|----|
| 28 | 37  | RFPLKVQNKK  | NA | NA |
| 41 | 36  | RFPLKVQNGG  | NA | NA |
| 14 | 14  | YGPRAIFSNY  | NA | NA |
| 19 | 26  | YGPRAIFKEH  | NA | NA |
| 20 | 33  | YGPRAIWGWS  | NA | NA |
| 26 | 27  | YGPRAIYQSI  | NA | NA |
| 4  | 10  | LVVRAHWNEY  | NA | NA |
| 32 | 45  | LVVRAHWDIW  | NA | NA |
| 33 | 31  | LVVRAHYRKI  | NA | NA |
| 58 | 80  | LVVRAHRVGG  | NA | NA |
| 49 | 58  | LVVRAHSQLV  | NA | NA |
| 50 | 63  | LVVRAHKVWA  | NA | NA |
| 9  | 10  | LVVRAHASGG  | NA | NA |
| 36 | 46  | LVVRAHHSES  | NA | NA |
| 49 | 40  | LVVRAHTNGY  | NA | NA |
| 99 | 108 | LVVRAHYLHR  | NA | NA |
| 79 | 95  | LVVRAHFAGW  | NA | NA |
| 44 | 55  | SDVRFLTNRG  | NA | NA |
| 45 | 33  | SDVRFLINEF  | NA | NA |
| 36 | 39  | SDVRFLYKAQ  | NA | NA |
| 63 | 65  | SDVRFLMYGH  | NA | NA |
| 57 | 77  | SDVRFLYMSA  | NA | NA |
| 46 | 42  | SDVRFLMYET  | NA | NA |
| 3  | 14  | WRPVNLTKKL  | NA | NA |
| 34 | 33  | TRPVNLTQAS  | NA | NA |
| 16 | 21  | MRPVNLTVMT  | NA | NA |
| 31 | 43  | MRPVNLTSGQ  | NA | NA |
| 22 | 27  | PRPVNLTSGQ  | NA | NA |
| 21 | 30  | LRPVNLTYEV  | NA | NA |
| 37 | 44  | FRPVNLTAQA  | NA | NA |
| 24 | 32  | LRPVNLTG GK | NA | NA |
| 24 | 31  | GRPVNLTDQG  | NA | NA |
| 8  | 17  | PRPVNLTLQR  | NA | NA |
| 34 | 35  | PRPVNLTDIR  | NA | NA |
| 36 | 43  | RVPVPMAKKF  | NA | NA |
| 32 | 35  | RVPVPMTDGG  | NA | NA |
| 38 | 33  | RVPVPMTKRG  | NA | NA |
| 49 | 83  | RVPVPMWYVA  | NA | NA |
| 38 | 49  | RVPVPMRYRF  | NA | NA |
| 55 | 35  | RVPVPMMAGF  | NA | NA |
| 15 | 15  | RVPVPMQAIV  | NA | NA |



|     |     |               |    |
|-----|-----|---------------|----|
| 222 | 241 | KHPYKYHYGV NA | NA |
| 15  | 15  | QAPRGVTVKG NA | NA |
| 19  | 34  | VSPRGVTVEG NA | NA |
| 67  | 82  | SHPRGVTVGR NA | NA |
| 52  | 47  | AHPRGVTVVI NA | NA |
| 28  | 38  | KPPRGVTVRG NA | NA |
| 30  | 37  | GMPRGVTVLQ NA | NA |
| 26  | 30  | WRPRGVTVGA NA | NA |
| 4   | 1   | MAPRGVTVMH NA | NA |
| 67  | 58  | YQPRGVTVPF NA | NA |
| 52  | 59  | KKPRGVTVKR NA | NA |
| 56  | 44  | RTPKGLKRVQ NA | NA |
| 38  | 83  | RTPKGLRARW NA | NA |
| 36  | 39  | RTPKGLQMAR NA | NA |
| 43  | 45  | RTPKGLHDIT NA | NA |
| 24  | 39  | RTPKGLVGWG NA | NA |
| 102 | 83  | RTPKGLSYQH NA | NA |
| 26  | 30  | RTPKGLFMHY NA | NA |
| 27  | 32  | RTPKGLWLKG NA | NA |
| 39  | 36  | RTPKGLRLKY NA | NA |
| 28  | 44  | SKPWKLTSIT NA | NA |
| 61  | 56  | SKPWKLTLII NA | NA |
| 62  | 83  | SKPWKLHDVS NA | NA |
| 87  | 87  | SKPWKLTLWF NA | NA |
| 36  | 45  | RQPRNVKQSH NA | NA |
| 77  | 83  | RQPRNVSRR NA  | NA |
| 43  | 52  | RQPRNVTGMI NA | NA |
| 27  | 39  | RQPRNVQMIK NA | NA |
| 61  | 67  | RQPRNVLVLV NA | NA |
| 28  | 23  | RQPRNVLGSA NA | NA |
| 36  | 40  | RQPRNVMGEG NA | NA |
| 60  | 48  | RQPRNVIKGA NA | NA |
| 50  | 54  | RQPRNVTQLF NA | NA |
| 46  | 45  | RQPRNVIMVS NA | NA |
| 35  | 50  | FLPRMLHLHS NA | NA |
| 37  | 26  | FLPRMLHVIR NA | NA |
| 9   | 12  | FLPRMLVGMS NA | NA |
| 61  | 83  | FLPRMLHYIS NA | NA |
| 48  | 53  | RLVNWMMVKS NA | NA |
| 69  | 77  | RLVNMHGGY NA  | NA |
| 146 | 170 | YDPRWLSLKL NA | NA |

|     |                   |    |
|-----|-------------------|----|
| 46  | 45 TDPRWLSKAG NA  | NA |
| 67  | 74 RDPRWLSRAQ NA  | NA |
| 78  | 68 SDPRWLSKAK NA  | NA |
| 36  | 42 KDPRWLSRET NA  | NA |
| 92  | 141 CDPRWLSKIH NA | NA |
| 53  | 66 DDPRWLSDIA NA  | NA |
| 45  | 50 GDPRWLSVTQ NA  | NA |
| 76  | 86 YDPRWLSLGI NA  | NA |
| 45  | 51 LIPTSLHNEG NA  | NA |
| 12  | 20 LIPTSLHNPG NA  | NA |
| 93  | 97 LIPTSLWVGW NA  | NA |
| 47  | 45 VEAVAIVVMG NA  | NA |
| 32  | 38 KSPRPYTNGR NA  | NA |
| 20  | 13 KSPRPYYLSG NA  | NA |
| 58  | 55 KSPRPYTGAK NA  | NA |
| 15  | 15 KSPRPYSNIG NA  | NA |
| 23  | 36 KSPRPYQMIV NA  | NA |
| 19  | 18 KSPRPYSYSS NA  | NA |
| 46  | 51 KSPRPYWYVI NA  | NA |
| 23  | 36 KSPRPYMSTW NA  | NA |
| 19  | 8 KSPRPYLLMQ NA   | NA |
| 18  | 25 KSPRPYANNI NA  | NA |
| 42  | 31 EWVKGMYSKR NA  | NA |
| 55  | 50 LSVKGMYSAT NA  | NA |
| 39  | 34 HAVKGMYSKS NA  | NA |
| 65  | 62 KWVKGMYSNA NA  | NA |
| 54  | 66 QPVKGMYSGW NA  | NA |
| 16  | 38 SQVKGMYSMQ NA  | NA |
| 64  | 75 WIVKGMYSHF NA  | NA |
| 56  | 67 EKVKGMYSSEA NA | NA |
| 42  | 51 DTVKGMYSRY NA  | NA |
| 52  | 64 IFVKGMYSSTR NA | NA |
| 25  | 36 QMVKGMYSQR NA  | NA |
| 120 | 134 RMWRAFHLPW NA | NA |
| 113 | 155 RMWRAFHLGT NA | NA |
| 76  | 92 TVPWSVTYRL NA  | NA |
| 75  | 86 TVPWSVHAGW NA  | NA |
| 43  | 50 TVPWSVTAGI NA  | NA |
| 53  | 64 TVPWSVHRIK NA  | NA |
| 56  | 94 TVPWSVHGKG NA  | NA |
| 37  | 58 SCVRMMHVVT NA  | NA |

|     |     |            |    |    |
|-----|-----|------------|----|----|
| 49  | 57  | SCVRMMHDTG | NA | NA |
| 4   | 1   | IAPEFLYGLF | NA | NA |
| 72  | 101 | HTVYWMWGQY | NA | NA |
| 54  | 59  | HTVYWMTQMG | NA | NA |
| 66  | 91  | HTVYWMVNRH | NA | NA |
| 64  | 50  | YKVRDLYFKT | NA | NA |
| 38  | 43  | KRVRDLYFLW | NA | NA |
| 52  | 73  | IPVRDLYFHR | NA | NA |
| 130 | 159 | TWVRDLYFHH | NA | NA |
| 96  | 114 | LDVRDLYFHF | NA | NA |
| 19  | 29  | TAVRDLYFSH | NA | NA |
| 109 | 142 | GRVRDLYFTH | NA | NA |
| 13  | 13  | TFVRDLYFQS | NA | NA |
| 60  | 76  | GPVRDLYFHG | NA | NA |
| 103 | 117 | HTVRGLFMKA | NA | NA |
| 128 | 138 | HTVRGLVGTH | NA | NA |
| 41  | 64  | HTVRGLVGSK | NA | NA |
| 55  | 65  | HTVRGLWKGR | NA | NA |
| 59  | 70  | HTVRGLWLRH | NA | NA |
| 21  | 32  | IGVRQLFKLK | NA | NA |
| 27  | 21  | IGVRQLIKPQ | NA | NA |
| 50  | 45  | IGVRQLHQNR | NA | NA |
| 8   | 6   | IGVRQLYSEG | NA | NA |
| 9   | 14  | IGVRQLFLEQ | NA | NA |
| 13  | 22  | IGVRQLTKRG | NA | NA |
| 30  | 38  | IGVRQLFRVL | NA | NA |
| 21  | 14  | IGVRQLAQQG | NA | NA |
| 25  | 32  | QRVRGVVPI  | NA | NA |
| 37  | 35  | QRVRGVSGRT | NA | NA |
| 22  | 20  | QRVRGVLSIA | NA | NA |
| 42  | 41  | QRVRGVHDGR | NA | NA |
| 26  | 22  | QRVRGVRYSI | NA | NA |
| 18  | 22  | QRVRGVRAIF | NA | NA |
| 35  | 49  | QRVRGVLAHY | NA | NA |
| 18  | 25  | KVPRGVRNVG | NA | NA |
| 46  | 53  | QVPRGVRNGH | NA | NA |
| 50  | 57  | HVPRGVRGSY | NA | NA |
| 39  | 58  | NVPRGVRAAI | NA | NA |
| 30  | 47  | RVPRGVRQRI | NA | NA |
| 46  | 57  | SVPRGVRDGY | NA | NA |
| 54  | 56  | EVPRGVRANW | NA | NA |

|     |                   |    |
|-----|-------------------|----|
| 51  | 53 HVPRGVRVGA NA  | NA |
| 57  | 84 YVPRGVRRIW NA  | NA |
| 40  | 61 YVPRGVRRNG NA  | NA |
| 52  | 57 NGPYNLRGWF NA  | NA |
| 41  | 50 NGPYNLWDWA NA  | NA |
| 40  | 45 NGPYNLWNEI NA  | NA |
| 37  | 46 GRATALYMIA NA  | NA |
| 23  | 35 DRATALYAEF NA  | NA |
| 24  | 26 PRATALYKVG NA  | NA |
| 60  | 55 MRATALYVWR NA  | NA |
| 33  | 64 PRATALYVKF NA  | NA |
| 37  | 46 MRATALYVMR NA  | NA |
| 68  | 78 NRATALYVNK NA  | NA |
| 38  | 57 GRATALYKGQ NA  | NA |
| 40  | 67 NRATALYGAA NA  | NA |
| 51  | 64 YRATALYGAS NA  | NA |
| 22  | 31 RRATALYSGI NA  | NA |
| 55  | 72 FWPRWLMSWV NA  | NA |
| 61  | 89 SSPRWLMSIW NA  | NA |
| 34  | 51 LSPRWLMSGs NA  | NA |
| 66  | 105 SKPRWLMSIH NA | NA |
| 109 | 131 FMPRWLMSMA NA | NA |
| 28  | 38 EAPRWLMSAR NA  | NA |
| 80  | 121 FWPRWLMSRF NA | NA |
| 54  | 53 EDPRWLMSIV NA  | NA |
| 65  | 70 YIPRWLMSQL NA  | NA |
| 74  | 82 LKPRWLMSsk NA  | NA |
| 77  | 90 GFPRWLMSNL NA  | NA |
| 39  | 37 TGPKLIHRNA NA  | NA |
| 36  | 47 TGPKLIRDVW NA  | NA |
| 50  | 62 TGPKLIYYRT NA  | NA |
| 37  | 28 TGPKLIIQSF NA  | NA |
| 34  | 43 TGPKLIHGRG NA  | NA |
| 21  | 20 TGPKLIVGQG NA  | NA |
| 37  | 28 TGPKLIWVWV NA  | NA |
| 29  | 30 TGPKLIKGRQ NA  | NA |
| 30  | 31 TGPKLIHDMF NA  | NA |
| 44  | 54 TSARKLTKKI NA  | NA |
| 58  | 60 TSARKLTLQY NA  | NA |
| 36  | 53 TSARKLIYMR NA  | NA |
| 92  | 123 TSARKLKMNW NA | NA |

|    |    |               |    |
|----|----|---------------|----|
| 29 | 34 | TSARKLYLLS NA | NA |
| 33 | 34 | TSARKLIYVL NA | NA |
| 16 | 14 | TSARKLISGT NA | NA |
| 75 | 90 | TSARKLQQLG NA | NA |
| 43 | 55 | RLPINLWNEV NA | NA |
| 42 | 53 | RLPINLTRVF NA | NA |
| 39 | 56 | RLPINLWGTH NA | NA |
| 35 | 42 | LNPRLYIGNG NA | NA |
| 14 | 18 | THPRLYIGSY NA | NA |
| 14 | 17 | GKPRLYIGHY NA | NA |
| 21 | 18 | TIPRLYIGMG NA | NA |
| 51 | 41 | ARPRLYIGVV NA | NA |
| 10 | 8  | AFPRLYIGPH NA | NA |
| 45 | 68 | WFPRLYIGMW NA | NA |
| 4  | 5  | AWPRLYIGSS NA | NA |
| 54 | 62 | CMPRLYIGLA NA | NA |
| 40 | 38 | QTPRLYIGMT NA | NA |
| 15 | 8  | QSPRLYIGPG NA | NA |
| 54 | 64 | QMPKFLVMIQ NA | NA |
| 37 | 51 | PTPKFLVMLW NA | NA |
| 45 | 57 | GHPKFLVMIK NA | NA |
| 21 | 21 | CPPKFLVMAT NA | NA |
| 32 | 27 | GTPKFLVMKQ NA | NA |
| 48 | 53 | MQPKFLVMPT NA | NA |
| 14 | 24 | MAPKFLVMHK NA | NA |
| 17 | 34 | LAPKFLVMQH NA | NA |
| 57 | 65 | QDPKFLVMLK NA | NA |
| 14 | 21 | WAPKFLVMIQ NA | NA |
| 49 | 69 | TWPKFLVMGH NA | NA |
| 43 | 58 | MGPWGMTKTG NA | NA |
| 19 | 33 | MGPWGMVALG NA | NA |
| 43 | 51 | MGPWGMAMPK NA | NA |
| 78 | 98 | HVPRQVFAAW NA | NA |
| 60 | 74 | HVPRQVQGVL NA | NA |
| 29 | 45 | HVPRQVISNW NA | NA |
| 59 | 62 | HVPRQVIVWH NA | NA |
| 48 | 41 | HVPRQVVVHV NA | NA |
| 18 | 28 | HVPRQVLGPH NA | NA |
| 47 | 67 | HVPRQVFKSA NA | NA |
| 78 | 85 | HVPRQVRSGG NA | NA |
| 40 | 64 | HVPRQVTQGG NA | NA |

|     |     |               |    |
|-----|-----|---------------|----|
| 42  | 60  | HVPRQVILHQ NA | NA |
| 113 | 137 | LMLRAMHSGQ NA | NA |
| 172 | 203 | IMLRAMHKHF NA | NA |
| 152 | 192 | YMLRAMHKKH NA | NA |
| 110 | 146 | KMLRAMHQAH NA | NA |
| 114 | 124 | QMLRAMHQQS NA | NA |
| 76  | 89  | KMLRAMHALF NA | NA |
| 102 | 120 | FMLRAMHMWK NA | NA |
| 127 | 179 | GMLRAMHYGH NA | NA |
| 27  | 46  | RMPRQVVAKG NA | NA |
| 70  | 82  | RMPRQVHRIV NA | NA |
| 45  | 52  | RMPRQVQNTV NA | NA |
| 55  | 52  | RMPRQVYLGR NA | NA |
| 37  | 39  | RMPRQVFQEA NA | NA |
| 38  | 51  | RMPRQVVSGL NA | NA |
| 31  | 33  | RMPRQVLSPV NA | NA |
| 108 | 128 | RMPRQVRNWH NA | NA |
| 67  | 61  | RMPRQVMLEL NA | NA |
| 60  | 65  | PMVLGLHKNQ NA | NA |
| 51  | 47  | LMVLGLHRKT NA | NA |
| 195 | 270 | HMVLGLHAQG NA | NA |
| 53  | 71  | GMVLGLHVLA NA | NA |
| 259 | 312 | HMVLGLHSQS NA | NA |
| 102 | 116 | LMVLGLHRKS NA | NA |
| 65  | 63  | DMVLGLHDGI NA | NA |
| 114 | 139 | CMVLGLHMTG NA | NA |
| 20  | 23  | WMVRSITWMR NA | NA |
| 73  | 71  | SQVRSITWWI NA | NA |
| 65  | 80  | FAVRSITWRL NA | NA |
| 51  | 51  | TKVRSITWVG NA | NA |
| 44  | 72  | IRVRSITWTV NA | NA |
| 35  | 51  | VDVRSITWPT NA | NA |
| 59  | 60  | NTVRSITWGF NA | NA |
| 48  | 52  | DWVRSITWGF NA | NA |
| 60  | 65  | FPVRSITWQV NA | NA |
| 29  | 43  | GAVRSITWMG NA | NA |
| 45  | 49  | GQPRAIRSGA NA | NA |
| 15  | 28  | LQPRAIRQGT NA | NA |
| 41  | 44  | MQPRAIRMVF NA | NA |
| 30  | 58  | HQPRAIRASL NA | NA |
| 19  | 19  | AQPRAIRDAR NA | NA |

|     |     |               |    |
|-----|-----|---------------|----|
| 27  | 62  | WQPRAIRNEV NA | NA |
| 55  | 76  | IQPRAIRNAG NA | NA |
| 50  | 81  | KDPKFLKMKW NA | NA |
| 28  | 44  | KDPKFLFGKL NA | NA |
| 19  | 27  | KDPKFLLNHR NA | NA |
| 43  | 46  | KDPKFLSKAQ NA | NA |
| 6   | 4   | KDPKFLQAWG NA | NA |
| 29  | 32  | KDPKFLKGGK NA | NA |
| 40  | 58  | KDPKFLMDQY NA | NA |
| 27  | 27  | KDPKFLSGAG NA | NA |
| 11  | 12  | KDPKFLISGG NA | NA |
| 37  | 41  | KDPKFLMDRA NA | NA |
| 87  | 110 | YIPLVYIMGL NA | NA |
| 104 | 105 | YIPLVYAMWV NA | NA |
| 51  | 59  | YIPLVYRDKS NA | NA |
| 60  | 101 | YIPLVYTAVQ NA | NA |
| 35  | 57  | YFVRWSTSHL NA | NA |
| 70  | 89  | YHVRWSTSSH NA | NA |
| 129 | 165 | WKVRWSTSAS NA | NA |
| 27  | 29  | MAVRWSTSEG NA | NA |
| 34  | 44  | FNVRWSTSNI NA | NA |
| 39  | 66  | KAVRWSTSEL NA | NA |
| 244 | 268 | HRVRWSTSRW NA | NA |
| 55  | 68  | NHVRWSTSHI NA | NA |
| 78  | 101 | FSVRWSTSPS NA | NA |
| 77  | 100 | YIPTAFHQPH NA | NA |
| 51  | 59  | YIPTAFHNIQ NA | NA |
| 17  | 28  | YIPTAFHAPY NA | NA |
| 46  | 56  | YIPTAFHDVK NA | NA |
| 43  | 47  | KFPWNYANNT NA | NA |
| 51  | 70  | WTPRGNTKIW NA | NA |
| 38  | 56  | WTPRGNQDRY NA | NA |
| 56  | 49  | WTPRGNTGGW NA | NA |
| 29  | 39  | WTPRGNMLMY NA | NA |
| 65  | 59  | WTPRGNVDVW NA | NA |
| 18  | 32  | WTPRGNWAPS NA | NA |
| 61  | 71  | WTPRGNTGWG NA | NA |
| 26  | 31  | WTPRGNYGKG NA | NA |
| 38  | 48  | WTPRGNFSMA NA | NA |
| 37  | 42  | TYPRGLGVSW NA | NA |
| 76  | 84  | DYPRGLGNHR NA | NA |

|     |                   |    |
|-----|-------------------|----|
| 65  | 86 FYPRGLGLVA NA  | NA |
| 103 | 137 FYPRGLGRPL NA | NA |
| 40  | 72 IYPRGLGRMI NA  | NA |
| 44  | 51 YYPRGLGVMA NA  | NA |
| 76  | 113 CYPRGLGRAK NA | NA |
| 69  | 71 DYPRGLGYNQ NA  | NA |
| 42  | 72 LYPRGLGGVH NA  | NA |
| 50  | 64 LYPRGLGNKQ NA  | NA |
| 67  | 59 GWPRFLIGAH NA  | NA |
| 44  | 51 LYPRFLIGGF NA  | NA |
| 37  | 46 LSPRFLIGRG NA  | NA |
| 43  | 60 EFPRFLIGGQ NA  | NA |
| 27  | 53 FPPRFLIGAV NA  | NA |
| 19  | 32 DIPRFLIGMG NA  | NA |
| 24  | 31 AIPRFLIGVA NA  | NA |
| 56  | 71 MIPRFLIGAF NA  | NA |
| 37  | 52 RLPKLLAQGS NA  | NA |
| 16  | 27 RLPKLLTLAA NA  | NA |
| 50  | 85 RLPKLLWDWY NA  | NA |
| 56  | 81 RLPKLLHRMQ NA  | NA |
| 58  | 45 RLPKLLLGHS NA  | NA |
| 62  | 99 RLPKLLSAGR NA  | NA |
| 65  | 57 RLPKLLYSNL NA  | NA |
| 26  | 32 RLPKLLKLQR NA  | NA |
| 79  | 102 RLPKLLLSWV NA | NA |
| 39  | 41 TAPKGMRMVK NA  | NA |
| 53  | 43 QHPKGMRMMV NA  | NA |
| 57  | 62 ERPKGMRMQV NA  | NA |
| 85  | 92 DHPKGMRMAV NA  | NA |
| 52  | 65 GMPKGMRMPR NA  | NA |
| 33  | 61 EDPKGMRMIQ NA  | NA |
| 42  | 45 GSPKGMRMGQ NA  | NA |
| 3   | 2 SAPKGMRMRK NA   | NA |
| 62  | 81 TDPKGMRMGQ NA  | NA |
| 74  | 126 WPKGMRMAS NA  | NA |
| 13  | 21 GPPKGMRMPK NA  | NA |
| 69  | 88 TNVFWYQVGH NA  | NA |
| 198 | 217 TNVFWYTYEH NA | NA |
| 62  | 89 TNVFWYWQPY NA  | NA |
| 86  | 111 TNVFWYRMRF NA | NA |
| 58  | 94 TNVFWYSKSL NA  | NA |



|     |     |                |    |
|-----|-----|----------------|----|
| 57  | 58  | TNVFWYIGTF NA  | NA |
| 57  | 59  | TNVFWYYMNR NA  | NA |
| 79  | 89  | TNVFWYKALH NA  | NA |
| 68  | 97  | RRPSALHRWL NA  | NA |
| 26  | 32  | RRPSALQNNK NA  | NA |
| 44  | 47  | RRPSALWNSR NA  | NA |
| 59  | 81  | MSPRKFGYQW NA  | NA |
| 70  | 99  | MSPRKFHYPV NA  | NA |
| 62  | 79  | MSPRKFMMAS NA  | NA |
| 89  | 109 | MSPRKFRGLQ NA  | NA |
| 53  | 61  | MSPRKFRDII NA  | NA |
| 41  | 61  | MSPRKFTVSEF NA | NA |
| 49  | 55  | VVPNNLHQGL NA  | NA |
| 64  | 75  | VVPNNLHKGY NA  | NA |
| 66  | 88  | VVPNNLHRTW NA  | NA |
| 33  | 37  | KVPKNQMNPS NA  | NA |
| 58  | 57  | CVPKNQMDIT NA  | NA |
| 50  | 57  | MVPKNQMGGI NA  | NA |
| 56  | 61  | YVPKNQMYEG NA  | NA |
| 44  | 48  | WVPKNQMSNI NA  | NA |
| 86  | 98  | IVPKNQMDAL NA  | NA |
| 67  | 49  | DVPKNQMSNA NA  | NA |
| 11  | 26  | SVPKNQMSSG NA  | NA |
| 99  | 99  | RVPKNQMYVH NA  | NA |
| 51  | 48  | CPARGLWSET NA  | NA |
| 68  | 92  | MYARGLWSEK NA  | NA |
| 42  | 56  | GTVRGLWSEG NA  | NA |
| 25  | 42  | ILVWNYALAF NA  | NA |
| 20  | 29  | ILVWNYRGVT NA  | NA |
| 53  | 39  | ILVWNYGPS NA   | NA |
| 51  | 50  | ILVWNYRQLS NA  | NA |
| 278 | 344 | ILVWNYHDTH NA  | NA |
| 41  | 33  | ILVWNYGLA NA   | NA |
| 45  | 45  | ILVWNYRMGS NA  | NA |
| 43  | 47  | GTVRAVYSAT NA  | NA |
| 38  | 46  | GKVRAVYSGV NA  | NA |
| 67  | 67  | CHVRAVYSQK NA  | NA |
| 19  | 24  | PPVRAVYSEG NA  | NA |
| 52  | 83  | EWVRAVYSAL NA  | NA |
| 13  | 25  | TFVRAVYSVG NA  | NA |
| 13  | 29  | RIVRAVYSQR NA  | NA |

|     |     |               |    |
|-----|-----|---------------|----|
| 38  | 48  | WIVRAVYSMR NA | NA |
| 57  | 75  | IFVRAVYSVA NA | NA |
| 37  | 46  | LWVRAVYSNF NA | NA |
| 34  | 57  | IFVRGLFTNR NA | NA |
| 25  | 32  | GMVRGLFTPW NA | NA |
| 3   | 8   | FFVRGLFTLQ NA | NA |
| 62  | 111 | HSVRGLFTLW NA | NA |
| 37  | 27  | PPVRGLFTTT NA | NA |
| 29  | 25  | ANVRGLFTSF NA | NA |
| 53  | 45  | LYVRGLFTTL NA | NA |
| 65  | 77  | NTVRGLFTWA NA | NA |
| 160 | 229 | MPVRGLFTRW NA | NA |
| 28  | 38  | IAPVHMWNNW NA | NA |
| 79  | 88  | TNPVHMWNTQ NA | NA |
| 63  | 63  | IPPVHMWNSV NA | NA |
| 43  | 48  | EDPVHMWNPB NA | NA |
| 53  | 75  | RAPVHMWNEH NA | NA |
| 49  | 65  | GIPVHMWNKV NA | NA |
| 63  | 72  | HWPVHMWNVF NA | NA |
| 48  | 60  | TPPVHMWNHQ NA | NA |
| 75  | 76  | SMPVHMWNPB NA | NA |
| 31  | 44  | TIPVHMWNIS NA | NA |
| 69  | 90  | VYPVHMWNEQ NA | NA |
| 37  | 38  | VKPSGVTLIR NA | NA |
| 57  | 59  | VKPSGVWRAK NA | NA |
| 32  | 28  | VKPSGVHNIQ NA | NA |
| 44  | 63  | VKPSGVQLIQ NA | NA |
| 57  | 49  | VKPSGVYAGL NA | NA |
| 83  | 92  | IFPANHILEH NA | NA |
| 30  | 37  | IFPANHINPQ NA | NA |
| 52  | 79  | IFPANHRGNA NA | NA |
| 26  | 30  | IFPANHIKKV NA | NA |
| 28  | 37  | IFPANHIDIT NA | NA |
| 45  | 61  | IFPANHHYIG NA | NA |
| 80  | 78  | IFPANHRNHW NA | NA |
| 20  | 19  | IFPANHISSY NA | NA |
| 105 | 120 | FIPMWSYMGH NA | NA |
| 120 | 184 | FIPMWSIRPH NA | NA |
| 46  | 47  | FIPMWSQDMA NA | NA |
| 85  | 93  | FIPMWSLGWL NA | NA |
| 49  | 65  | FIPMWSQKTA NA | NA |

|     |                   |    |
|-----|-------------------|----|
| 47  | 58 FIPMWSTRNI NA  | NA |
| 17  | 24 FIPMWSQRLQ NA  | NA |
| 82  | 71 FIPMWSQDAW NA  | NA |
| 52  | 57 FIPMWSWQLG NA  | NA |
| 30  | 29 FIPMWSTGPT NA  | NA |
| 28  | 32 NSPSDLWYKF NA  | NA |
| 20  | 20 NSPSDLYSVV NA  | NA |
| 80  | 98 WMPRSYIQLF NA  | NA |
| 43  | 67 IMPRSYIQHG NA  | NA |
| 35  | 35 GMPRSYINRQ NA  | NA |
| 41  | 38 GMPRSYIMRY NA  | NA |
| 108 | 141 CMPRSYIRLW NA | NA |
| 50  | 45 TmprSYILER NA  | NA |
| 27  | 33 TmprSYIGNI NA  | NA |
| 35  | 41 RmprSYIGGF NA  | NA |
| 35  | 39 RmprSYIGRG NA  | NA |
| 83  | 97 IMPRSYIAAY NA  | NA |
| 44  | 52 RLPYPLTRKG NA  | NA |
| 62  | 66 RLPYPLTQLK NA  | NA |
| 20  | 17 RLPYPLTRTS NA  | NA |
| 58  | 75 RLPYPLTVQL NA  | NA |
| 92  | 96 YYVRGMHGVG NA  | NA |
| 39  | 53 NRVRGMHGTG NA  | NA |
| 75  | 92 FNVRGMHGWT NA  | NA |
| 96  | 113 CTVRGMHGTG NA | NA |
| 58  | 59 YNVRGMHGVI NA  | NA |
| 107 | 125 FFVRGMHGPF NA | NA |
| 60  | 78 AAVRGMHGTT NA  | NA |
| 95  | 83 DKVRGMHGRG NA  | NA |
| 19  | 17 YAPLKITRPY NA  | NA |
| 27  | 49 WRPLKITRHW NA  | NA |
| 33  | 41 LSPLKITRNQ NA  | NA |
| 63  | 61 CTPLKITRVG NA  | NA |
| 69  | 100 NIPLKITRTF NA | NA |
| 45  | 41 NTPLKITREH NA  | NA |
| 20  | 28 DRPLKITRKS NA  | NA |
| 66  | 66 IHPLKITRQY NA  | NA |
| 56  | 54 FPPLKITRWT NA  | NA |
| 52  | 53 FWPKWMRHTI NA  | NA |
| 35  | 35 IQPKWMRHNI NA  | NA |
| 59  | 82 CRPKWMRHIT NA  | NA |

|     |     |            |    |    |
|-----|-----|------------|----|----|
| 19  | 27  | YSPKWMRHNS | NA | NA |
| 33  | 54  | WRPKWMRHAG | NA | NA |
| 96  | 108 | AWPKWMRHNY | NA | NA |
| 7   | 17  | TKPKWMRHSS | NA | NA |
| 86  | 101 | RPPKWMRHHL | NA | NA |
| 74  | 115 | DNPKWMRHGT | NA | NA |
| 61  | 102 | DNPKWMRHQI | NA | NA |
| 112 | 148 | VQPKWMRHNL | NA | NA |
| 43  | 50  | FVVRLQLKLY | NA | NA |
| 63  | 76  | FVVRLLVGKH | NA | NA |
| 78  | 77  | FVVRLLSVTH | NA | NA |
| 24  | 26  | FVVRLLLKWG | NA | NA |
| 17  | 28  | FVVRLIMQA  | NA | NA |
| 47  | 48  | FVVRLLRVNY | NA | NA |
| 25  | 22  | FVVRLQLGF  | NA | NA |
| 48  | 67  | FVVRLLAGMQ | NA | NA |
| 85  | 83  | FVVRLHKTTH | NA | NA |
| 87  | 111 | NFPRSHRVKA | NA | NA |
| 121 | 156 | EHPRSHRVPW | NA | NA |
| 53  | 66  | INPRSHRVSG | NA | NA |
| 57  | 81  | PYPRSHRVIT | NA | NA |
| 57  | 80  | GTPRSHRVER | NA | NA |
| 63  | 70  | TNPRSHRVVV | NA | NA |
| 50  | 63  | PTPRSHRVRG | NA | NA |
| 85  | 104 | IWPRSHRVGG | NA | NA |
| 86  | 107 | EMPRSHRVGH | NA | NA |
| 81  | 93  | LMPRSHRVMQ | NA | NA |
| 46  | 39  | YGPSLLTQTV | NA | NA |
| 46  | 54  | YGPSLLYYHG | NA | NA |
| 33  | 27  | YGPSLLYGWF | NA | NA |
| 65  | 62  | TPVRWYSNAI | NA | NA |
| 107 | 135 | HHVRWYSNMK | NA | NA |
| 62  | 70  | SKVRWYSNQA | NA | NA |
| 82  | 86  | MTVRWYSNGL | NA | NA |
| 83  | 72  | ASVRWYSNRT | NA | NA |
| 53  | 60  | TSVRWYSNQH | NA | NA |
| 71  | 65  | EQVRWYSNHF | NA | NA |
| 41  | 44  | PTVRWYSNPQ | NA | NA |
| 239 | 266 | MHVRWYSNRW | NA | NA |
| 52  | 62  | VIVRWYSNLG | NA | NA |
| 52  | 73  | FTPYGLVDRL | NA | NA |

|    |     |             |    |    |
|----|-----|-------------|----|----|
| 53 | 48  | LTPYGLVRPQ  | NA | NA |
| 51 | 66  | HTPYGLVRVV  | NA | NA |
| 56 | 63  | LTPYGLVVEW  | NA | NA |
| 91 | 105 | CTPYGLVVNW  | NA | NA |
| 96 | 110 | MTPYGLVLP   | NA | NA |
| 35 | 47  | GTPYGLVLEH  | NA | NA |
| 59 | 58  | PTPYGLVGTK  | NA | NA |
| 67 | 64  | MTPYGLVMPK  | NA | NA |
| 65 | 78  | KTPYGLVYER  | NA | NA |
| 35 | 57  | HAPRGSTGNW  | NA | NA |
| 41 | 47  | HAPRGSRMAL  | NA | NA |
| 90 | 114 | HAPRGSRSWS  | NA | NA |
| 11 | 19  | HAPRGSYSIK  | NA | NA |
| 6  | 15  | HAPRGSTKTF  | NA | NA |
| 23 | 38  | HAPRGSTGTS  | NA | NA |
| 39 | 44  | HAPRGSQDAH  | NA | NA |
| 6  | 11  | HAPRGSAAEA  | NA | NA |
| 37 | 46  | HAPRGSIGQK  | NA | NA |
| 50 | 52  | HAPRGSQRKL  | NA | NA |
| 85 | 92  | NVPVWYMLA   | NA | NA |
| 42 | 62  | NVPVWMTGMS  | NA | NA |
| 89 | 85  | NVPVWMTRIK  | NA | NA |
| 70 | 85  | NVPVWMFGWK  | NA | NA |
| 38 | 48  | NVPVWMQGAS  | NA | NA |
| 61 | 93  | NVPVWMRASK  | NA | NA |
| 52 | 60  | NVPVWMVKSK  | NA | NA |
| 14 | 12  | VPPRVLAAALI | NA | NA |
| 24 | 31  | VPPRVLWMLQ  | NA | NA |
| 28 | 50  | VPPRVLWAGV  | NA | NA |
| 29 | 44  | VPPRVLKKWY  | NA | NA |
| 14 | 19  | VPPRVLASVA  | NA | NA |
| 22 | 49  | VPPRVLVLLL  | NA | NA |
| 51 | 45  | VPPRVLIIYHF | NA | NA |
| 14 | 23  | VPPRVLVALA  | NA | NA |
| 20 | 30  | VPPRVLKDVQ  | NA | NA |
| 75 | 95  | TYPKSLVRWY  | NA | NA |
| 71 | 74  | THPKSLVRGG  | NA | NA |
| 18 | 27  | NMPKSLVRWS  | NA | NA |
| 53 | 55  | NMPKSLVRGQ  | NA | NA |
| 51 | 70  | VMPKSLVRRRI | NA | NA |
| 0  | 3   | EAPKSLVRKA  | NA | NA |

|     |     |               |    |
|-----|-----|---------------|----|
| 32  | 54  | QQPKSLVRVY NA | NA |
| 91  | 149 | HWPKSLVRRL NA | NA |
| 50  | 45  | RIPKSLVRIK NA | NA |
| 37  | 46  | DNPKSLVRVI NA | NA |
| 31  | 29  | KSPSLYTSWV NA | NA |
| 28  | 28  | KSPSLYTYLL NA | NA |
| 69  | 72  | LSVFWLTGWK NA | NA |
| 50  | 66  | LSVFWLHAIR NA | NA |
| 40  | 61  | LSVFWLHKSG NA | NA |
| 73  | 85  | LSVFWLHNPW NA | NA |
| 59  | 51  | IDPTNLRTRT NA | NA |
| 33  | 37  | IAPTNLRTGI NA | NA |
| 15  | 21  | GYPTNLRTGA NA | NA |
| 50  | 75  | FWPTNLRTIA NA | NA |
| 67  | 81  | HNPTNLRTIW NA | NA |
| 51  | 72  | KWPTNLRTTL NA | NA |
| 41  | 50  | GHPTNLRTNT NA | NA |
| 24  | 20  | DAPTNLRTNS NA | NA |
| 37  | 48  | ANPTNLRTGH NA | NA |
| 21  | 31  | DSPTNLRTHK NA | NA |
| 92  | 97  | CWPTNLRTVL NA | NA |
| 111 | 97  | KTVVWYMSAK NA | NA |
| 65  | 71  | KTVVWYFDSL NA | NA |
| 76  | 92  | KTVVWYTMGK NA | NA |
| 25  | 24  | KTVVWYSQNT NA | NA |
| 41  | 48  | KTVVWYIKTT NA | NA |
| 21  | 33  | KTVVWYLAAY NA | NA |
| 67  | 71  | KTVVWYTDGS NA | NA |
| 80  | 89  | KTVVWYVQHW NA | NA |
| 75  | 96  | KTVVWYLGNF NA | NA |
| 28  | 35  | QPLSWVHQNA NA | NA |
| 37  | 38  | WLPRAVMVGY NA | NA |
| 19  | 24  | WLPRAVMAHT NA | NA |
| 38  | 33  | WLPRAVFMWL NA | NA |
| 23  | 45  | WLPRAVTGGQ NA | NA |
| 28  | 30  | WLPRAVSSNG NA | NA |
| 35  | 55  | WLPRAVAYRV NA | NA |
| 29  | 42  | WLPRAVMKKL NA | NA |
| 19  | 37  | WLPRAVANER NA | NA |
| 35  | 39  | WLPRAVVGG NA  | NA |
| 62  | 71  | SLNRALYSVQ NA | NA |

|    |     |               |    |
|----|-----|---------------|----|
| 82 | 87  | SLNRALVAML NA | NA |
| 44 | 66  | SLNRALWSPK NA | NA |
| 70 | 116 | SLNRALHRIY NA | NA |
| 40 | 47  | SLNRALWMRG NA | NA |
| 30 | 38  | TAPKLLRVSI NA | NA |
| 16 | 17  | TAPKLLQRIA NA | NA |
| 43 | 65  | TAPKLLVSPR NA | NA |
| 18 | 30  | TAPKLLAQTK NA | NA |
| 62 | 64  | TAPKLLHRIA NA | NA |
| 19 | 13  | TAPKLLMAQG NA | NA |
| 16 | 29  | TAPKLLTAGL NA | NA |
| 16 | 33  | TAPKLLSVQH NA | NA |
| 58 | 53  | TAPKLLYGSR NA | NA |
| 52 | 66  | TAPKLLWKAK NA | NA |
| 72 | 92  | NRPRGLTGRG NA | NA |
| 46 | 61  | ARPRGLTREF NA | NA |
| 64 | 72  | PRPRGLTSKH NA | NA |
| 36 | 42  | SRPRGLTYSQ NA | NA |
| 29 | 53  | RRPRGLTQTV NA | NA |
| 31 | 45  | ARPRGLTSLW NA | NA |
| 38 | 44  | QRPRGLTGRW NA | NA |
| 86 | 143 | YRPRGLTMMS NA | NA |
| 36 | 45  | ERPRGLTGGG NA | NA |
| 18 | 14  | WRPRGLTNKY NA | NA |
| 53 | 70  | WMPLGMAGPG NA | NA |
| 72 | 66  | WMPLGMRAGG NA | NA |
| 43 | 60  | WMPLGMTSEQ NA | NA |
| 47 | 60  | WMPLGMVMSR NA | NA |
| 26 | 28  | VFTRNLTGLF NA | NA |
| 39 | 29  | VFTRNLTNRG NA | NA |
| 54 | 59  | WDPKWIIQKG NA | NA |
| 77 | 87  | RIPKWIIQHT NA | NA |
| 36 | 41  | GSPKWIIQGY NA | NA |
| 28 | 27  | EAPKWIIQWT NA | NA |
| 84 | 102 | VYPKWIIQKA NA | NA |
| 40 | 43  | YRPKWIIQLY NA | NA |
| 97 | 118 | WSPKWIIQWH NA | NA |
| 39 | 70  | IAPKWIIQTW NA | NA |
| 58 | 52  | PFPKWIIQAG NA | NA |
| 59 | 93  | IWPKWIIQSW NA | NA |
| 22 | 28  | PGPRSLFVIG NA | NA |

|     |     |               |    |
|-----|-----|---------------|----|
| 44  | 44  | PGPRSLFGSA NA | NA |
| 68  | 74  | WGPRSLFYRY NA | NA |
| 41  | 44  | NGPRSLFKWG NA | NA |
| 39  | 58  | KGPRSLFQLW NA | NA |
| 38  | 59  | CGPRSLFAQF NA | NA |
| 31  | 50  | SGPRSLFLGT NA | NA |
| 30  | 25  | KGPRSLFVPT NA | NA |
| 22  | 35  | HGPRSLFNGT NA | NA |
| 32  | 35  | MGPRSLFYLL NA | NA |
| 76  | 83  | QSPRMLVNAQ NA | NA |
| 34  | 23  | QSPRMLYSTR NA | NA |
| 39  | 64  | QSPRMLVLGK NA | NA |
| 66  | 78  | QSPRMLVMAQ NA | NA |
| 33  | 47  | HYPLNSWGES NA | NA |
| 87  | 95  | HYPLNSARPT NA | NA |
| 56  | 70  | HYPLNSWDMG NA | NA |
| 56  | 36  | HYPLNSWDLA NA | NA |
| 139 | 154 | HYPLNSTMHR NA | NA |
| 59  | 41  | HYPLNSVQMV NA | NA |
| 41  | 51  | GNPYKLRRNY NA | NA |
| 30  | 25  | GNPYKLWAQA NA | NA |
| 22  | 28  | GNPYKLTDIR NA | NA |
| 23  | 30  | GNPYKLTQMG NA | NA |
| 93  | 97  | GNPYKLRAGL NA | NA |
| 122 | 107 | GNPYKLHAAY NA | NA |
| 107 | 124 | GNPYKLHSAH NA | NA |
| 35  | 37  | WAPRSLVUTA NA | NA |
| 34  | 34  | KAPRSLVGLV NA | NA |
| 27  | 18  | PAPRSLVRNT NA | NA |
| 16  | 22  | PAPRSLVDNF NA | NA |
| 14  | 19  | HAPRSLVGPS NA | NA |
| 56  | 70  | MAPRSLVKWW NA | NA |
| 18  | 25  | PAPRSLVNVR NA | NA |
| 42  | 88  | SAPRSLVGRY NA | NA |
| 13  | 24  | TAPRSLVYSS NA | NA |
| 3   | 2   | KSPVFLQYKV NA | NA |
| 3   | 6   | KSPVFLTKKG NA | NA |
| 14  | 15  | KSPVFLQNHL NA | NA |
| 42  | 58  | KSPVFLMVQT NA | NA |
| 6   | 14  | KSPVFLHYMS NA | NA |
| 34  | 33  | KSPVFLVYEF NA | NA |



|     |     |               |    |
|-----|-----|---------------|----|
| 8   | 12  | KSPVFLQQAT NA | NA |
| 21  | 24  | KSPVFLFRHA NA | NA |
| 28  | 23  | KSPVFLHLGK NA | NA |
| 17  | 28  | KSPVFLRGQV NA | NA |
| 83  | 147 | FYARLLRLNT NA | NA |
| 89  | 142 | LYARLLRNQV NA | NA |
| 43  | 59  | GYARLLRDTT NA | NA |
| 102 | 139 | QYARLLRGQV NA | NA |
| 86  | 99  | NYARLLRRNR NA | NA |
| 90  | 109 | FYARLLRAQR NA | NA |
| 78  | 105 | QYARLLRDMI NA | NA |
| 48  | 69  | VYARLLRKIG NA | NA |
| 125 | 154 | MYARLLRMSG NA | NA |
| 124 | 150 | SYARLLRAMK NA | NA |
| 69  | 89  | GRPRSLWMWF NA | NA |
| 19  | 16  | GRPRSLTYAG NA | NA |
| 79  | 94  | GRPRSLAMIV NA | NA |
| 39  | 31  | GRPRSLVGKG NA | NA |
| 51  | 60  | GRPRSLFSSW NA | NA |
| 28  | 40  | TIPRPVMQMG NA | NA |
| 46  | 54  | GIPRPVMLHR NA | NA |
| 34  | 47  | YIPRPVMGIY NA | NA |
| 28  | 35  | LIPRPVMRMS NA | NA |
| 58  | 77  | MIPRPVMDGQ NA | NA |
| 17  | 17  | GIPRPVMDAY NA | NA |
| 33  | 53  | MIPRPVMGAF NA | NA |
| 21  | 36  | AIPRPVMMIK NA | NA |
| 35  | 33  | IIPRPVMQIS NA | NA |
| 42  | 36  | QIPRPVMAGR NA | NA |
| 63  | 43  | NIPRPVMGQA NA | NA |
| 29  | 35  | MQPRGQVFEV NA | NA |
| 32  | 22  | ETPRGQVFIK NA | NA |
| 51  | 74  | PFPRGQVFNW NA | NA |
| 75  | 81  | RWPRGQVFVA NA | NA |
| 27  | 38  | VRPRGQVFAT NA | NA |
| 58  | 57  | YTPRGQVFHV NA | NA |
| 28  | 35  | THPRGQVFPV NA | NA |
| 36  | 31  | VWPRGQVFPV NA | NA |
| 35  | 39  | HNPRGQVFPH NA | NA |
| 24  | 43  | SKPRGQVFKY NA | NA |
| 37  | 36  | KTPRGQVFGS NA | NA |

|     |     |                |    |
|-----|-----|----------------|----|
| 9   | 12  | VMLRFLHAMS NA  | NA |
| 37  | 59  | VMLRFLWNGQ NA  | NA |
| 25  | 27  | VMLRFLWDMS NA  | NA |
| 54  | 65  | VMVRHVRAAGT NA | NA |
| 35  | 68  | LQVRHVARAMA NA | NA |
| 39  | 52  | GHVRHVRAEF NA  | NA |
| 82  | 86  | NWVRHVRAIW NA  | NA |
| 154 | 216 | CDVRHVRAHF NA  | NA |
| 81  | 106 | FHVRHVRAAMT NA | NA |
| 47  | 54  | NSVRHVRAKA NA  | NA |
| 47  | 48  | PYVRHVRAAPK NA | NA |
| 49  | 60  | PWVRHVRAAGG NA | NA |
| 37  | 43  | RAVRHVRAKA NA  | NA |
| 34  | 34  | ATPESLHMRG NA  | NA |
| 55  | 78  | ATPESLHMIR NA  | NA |
| 31  | 37  | EHPQWITGKT NA  | NA |
| 19  | 13  | VAPQWITGTG NA  | NA |
| 62  | 75  | WWPQWITGGK NA  | NA |
| 82  | 79  | GFPQWITGHL NA  | NA |
| 32  | 33  | WSPQWITGHS NA  | NA |
| 60  | 75  | QMPQWITGAY NA  | NA |
| 39  | 50  | NRPQWITGVS NA  | NA |
| 44  | 57  | QYPQWITGNY NA  | NA |
| 77  | 62  | EWPQWITGSY NA  | NA |
| 11  | 7   | KAPQWITGSA NA  | NA |
| 12  | 30  | QAPRSLQVER NA  | NA |
| 23  | 41  | NAPRSLQDRK NA  | NA |
| 11  | 10  | PAPRSLQSEG NA  | NA |
| 13  | 22  | RAPRSLQGWY NA  | NA |
| 25  | 25  | FAPRSLQSAK NA  | NA |
| 5   | 8   | FAPRSLQVMK NA  | NA |
| 48  | 58  | SAPRSLQGMW NA  | NA |
| 39  | 39  | GAPRSLQQNK NA  | NA |
| 4   | 11  | GAPRSLQQLG NA  | NA |
| 98  | 113 | VLWRALHYKS NA  | NA |
| 55  | 86  | VLWRALHNGG NA  | NA |
| 48  | 46  | KSVRFLMNNG NA  | NA |
| 95  | 122 | PWVRFLMNRH NA  | NA |
| 20  | 17  | SHVRFLMNLG NA  | NA |
| 99  | 125 | MTVRFLMNKW NA  | NA |
| 22  | 26  | QSVRFLMNPQ NA  | NA |

|     |                   |    |
|-----|-------------------|----|
| 24  | 40 VMVRFLMNQQ NA  | NA |
| 55  | 55 SHVRFLMNRA NA  | NA |
| 66  | 51 LHVRFLMNGV NA  | NA |
| 87  | 94 CRVRFLMNWG NA  | NA |
| 70  | 83 VHVRFLMNRL NA  | NA |
| 66  | 56 DQVRFLMNVQ NA  | NA |
| 54  | 59 RLPVAIWDSQ NA  | NA |
| 68  | 76 RLPVAIMRVF NA  | NA |
| 31  | 37 RLPVAIQGAV NA  | NA |
| 43  | 45 RLPVAIWDGW NA  | NA |
| 38  | 51 RLPVAIYGGV NA  | NA |
| 12  | 13 TSPVALAGKH NA  | NA |
| 26  | 25 TSPVALTYTK NA  | NA |
| 8   | 11 TSPVALARGV NA  | NA |
| 39  | 37 TSPVALALGH NA  | NA |
| 58  | 85 TSPVALRGHK NA  | NA |
| 22  | 27 TSPVALWYTF NA  | NA |
| 25  | 29 TSPVALYLIL NA  | NA |
| 22  | 26 TSPVALMAMK NA  | NA |
| 70  | 115 KKWRGLHGNH NA | NA |
| 37  | 32 ARPEFLHYPG NA  | NA |
| 28  | 36 ARPEFLYSPY NA  | NA |
| 60  | 56 EVARAMWYMT NA  | NA |
| 80  | 97 EVARAMYNEH NA  | NA |
| 115 | 123 EVARAMMSMQ NA | NA |
| 30  | 20 EVARAMILEY NA  | NA |
| 103 | 123 EVARAMYAIA NA | NA |
| 35  | 52 GYPRSLYTGW NA  | NA |
| 17  | 42 VQPRSLYTMF NA  | NA |
| 30  | 34 ESPRSLYTNF NA  | NA |
| 39  | 45 MWPRSLYTPH NA  | NA |
| 29  | 51 YTPRSLYTPY NA  | NA |
| 52  | 54 WDPRSLYTNR NA  | NA |
| 60  | 75 YQPRSLYTWY NA  | NA |
| 49  | 56 TMPRSLYTEL NA  | NA |
| 21  | 29 VRPRSLYTWF NA  | NA |
| 32  | 45 GFPRSLYTES NA  | NA |
| 44  | 25 SDPYGMRGAG NA  | NA |
| 76  | 97 YDPYGMRNGK NA  | NA |
| 50  | 51 FDPYGMRQKQ NA  | NA |
| 31  | 54 KDPYGMRRVF NA  | NA |

|     |     |                |    |
|-----|-----|----------------|----|
| 67  | 55  | DDPYGMRSKI NA  | NA |
| 63  | 64  | QDPYGMRAGQ NA  | NA |
| 52  | 42  | PDPYGMKRGY NA  | NA |
| 78  | 114 | ADPYGMRYGI NA  | NA |
| 67  | 98  | LDPYGMRRST NA  | NA |
| 75  | 82  | PDPYGMRMIT NA  | NA |
| 37  | 44  | RYPRNIGRLK NA  | NA |
| 81  | 96  | NYPRNIGGHW NA  | NA |
| 44  | 53  | LYPRNIGVMG NA  | NA |
| 47  | 45  | TYPRNIGGQY NA  | NA |
| 21  | 31  | RYPRNIGSNG NA  | NA |
| 49  | 38  | YYPRNIGGQR NA  | NA |
| 57  | 80  | VYPRNIGKHW NA  | NA |
| 31  | 44  | RYPRNIGSMR NA  | NA |
| 85  | 94  | FYPRNIGVAL NA  | NA |
| 18  | 20  | ELVRSWLWQT NA  | NA |
| 30  | 21  | FVVRALMLTS NA  | NA |
| 47  | 45  | FVVRALQNQI NA  | NA |
| 54  | 51  | FVVRALVNNF NA  | NA |
| 39  | 32  | FVVRALTGKS NA  | NA |
| 44  | 69  | FVVRALAMKG NA  | NA |
| 42  | 46  | FVVRALTMWV NA  | NA |
| 35  | 44  | FVVRALAGQS NA  | NA |
| 35  | 27  | FGPYAMTSMG NA  | NA |
| 23  | 40  | FGPYAMAAQR NA  | NA |
| 129 | 151 | FGPYAMRYGA NA  | NA |
| 45  | 54  | FGPYAMARSV NA  | NA |
| 30  | 33  | FGPYAMRSNS NA  | NA |
| 31  | 33  | QAPMGLVDLA NA  | NA |
| 152 | 153 | YDSRGLHVG V NA | NA |
| 28  | 68  | PYPVPFQMPH NA  | NA |
| 89  | 97  | PYPVPFWVAK NA  | NA |
| 30  | 33  | YVPTGLVDGS NA  | NA |
| 76  | 86  | FMPRNHALII NA  | NA |
| 35  | 35  | FMPRNHSGPH NA  | NA |
| 75  | 116 | FMPRNMVVRS NA  | NA |
| 31  | 26  | FMPRNIFDLG NA  | NA |
| 64  | 79  | FMPRNQWDHA NA  | NA |
| 64  | 75  | FMPRNYMAMQ NA  | NA |
| 75  | 95  | FMPRN LHGRQ NA | NA |
| 12  | 13  | FMPRN LQQTG NA | NA |

|     |     |               |    |
|-----|-----|---------------|----|
| 24  | 40  | FMPRNMILPW NA | NA |
| 69  | 82  | FMPRNHKNST NA | NA |
| 35  | 36  | WHPVSLTMEQ NA | NA |
| 65  | 74  | WHPVSLYRRH NA | NA |
| 29  | 41  | QHPRFIRLEA NA | NA |
| 40  | 43  | GYPRFIRLIG NA | NA |
| 49  | 54  | CQPRFIRLLG NA | NA |
| 93  | 113 | HMPRFIRLHA NA | NA |
| 66  | 74  | GMPRFIRLSR NA | NA |
| 89  | 93  | WFPRFIRLWQ NA | NA |
| 49  | 61  | NHPRFIRLMV NA | NA |
| 35  | 37  | NNPRFIRLEG NA | NA |
| 78  | 99  | NYPRFIRLLG NA | NA |
| 19  | 26  | NFPRFIRLGS NA | NA |
| 17  | 20  | TYPRFIRLTS NA | NA |
| 79  | 106 | RLPVHYYDLI NA | NA |
| 49  | 64  | RLPVHYVNGK NA | NA |
| 64  | 87  | RLPVHYMES NA  | NA |
| 42  | 45  | RLPVHYMSTI NA | NA |
| 109 | 136 | RLPVHYRNLN NA | NA |
| 61  | 83  | RLPVHYFLVV NA | NA |
| 19  | 21  | DLPAGLHDEI NA | NA |
| 50  | 43  | RIPRFLYRV NA  | NA |
| 37  | 42  | RIPRFLIGSV NA | NA |
| 45  | 38  | RIPRFLFLHQ NA | NA |
| 61  | 72  | RIPRFLYGWH NA | NA |
| 19  | 21  | RIPRFLISGG NA | NA |
| 40  | 43  | RIPRFLTGQW NA | NA |
| 47  | 47  | RIPRFLWYSI NA | NA |
| 25  | 32  | RIPRFLQLSQ NA | NA |
| 70  | 107 | LFPRMLVLKQ NA | NA |
| 48  | 46  | CHPRMLVLQF NA | NA |
| 50  | 67  | NNPRMLVLNK NA | NA |
| 50  | 51  | LIPRMLVLAQ NA | NA |
| 82  | 84  | CKPRMLVLAG NA | NA |
| 75  | 107 | MDPRMLVLVH NA | NA |
| 81  | 115 | KIPRMLVLWR NA | NA |
| 39  | 39  | DFPRMLVLGF NA | NA |
| 51  | 54  | RTPRMLVLWS NA | NA |
| 105 | 112 | FWPRMLVLAL NA | NA |
| 11  | 15  | AKVSWLRILQ NA | NA |

|     |                   |    |
|-----|-------------------|----|
| 57  | 74 QWPVALWATP NA  | NA |
| 82  | 119 CMWKRLWATP NA | NA |
| 26  | 32 SQVRFLYGMT NA  | NA |
| 34  | 29 SQVRFLYYMH NA  | NA |
| 94  | 92 SQVRFLHYAQ NA  | NA |
| 53  | 68 SQVRFLVQKW NA  | NA |
| 41  | 58 SQVRFLTRTV NA  | NA |
| 21  | 23 SQVRFLHDNV NA  | NA |
| 36  | 33 SQVRFLVAPA NA  | NA |
| 39  | 45 SQVRFLIGTT NA  | NA |
| 0   | 1 SLVRFLMLMQ NA   | NA |
| 43  | 60 SLVRFLHNST NA  | NA |
| 44  | 43 SLVRFLTAEA NA  | NA |
| 38  | 52 SLVRFLWNTG NA  | NA |
| 78  | 119 VRPRPFWQTH NA | NA |
| 57  | 64 VRPRPFAYIA NA  | NA |
| 21  | 41 VRPRPFRRMA NA  | NA |
| 92  | 128 VRPRPFWQHL NA | NA |
| 28  | 40 VRPRPFYIEA NA  | NA |
| 104 | 115 YYPRALQDHV NA | NA |
| 25  | 24 YYPRALMAAY NA  | NA |
| 16  | 21 YYPRALFLKG NA  | NA |
| 26  | 31 YYPRALVASA NA  | NA |
| 119 | 126 YYPRALHRGS NA | NA |
| 80  | 71 YYPRALWGST NA  | NA |
| 39  | 39 YDVYNLHGPD NA  | NA |
| 19  | 23 YDVYNLHDPS NA  | NA |
| 15  | 14 YDVYNLHRSG NA  | NA |
| 29  | 30 VIPRPLYSNY NA  | NA |
| 42  | 49 VIPRPLMRHK NA  | NA |
| 25  | 31 VIPRPLFLGF NA  | NA |
| 50  | 64 VIPRPLALVH NA  | NA |
| 9   | 14 VIPRPLVKKG NA  | NA |
| 22  | 24 VIPRPLTKTS NA  | NA |
| 73  | 80 VIPRPLRYAT NA  | NA |
| 35  | 34 RRPTNLTGGA NA  | NA |
| 12  | 14 RRPTNLYSKG NA  | NA |
| 21  | 22 RRPTNLHGSK NA  | NA |
| 47  | 47 RRPTNLYYKQ NA  | NA |
| 60  | 72 RRPTNLHGHE NA  | NA |
| 46  | 63 RRPTNLHVRV NA  | NA |

|     |                   |    |
|-----|-------------------|----|
| 62  | 95 RVPYGLYLAW NA  | NA |
| 36  | 50 RVPYGLYQPY NA  | NA |
| 24  | 24 LAPRFLSGMG NA  | NA |
| 5   | 13 KAPRFLSKGR NA  | NA |
| 64  | 90 HAPRFLSAAY NA  | NA |
| 15  | 12 YAPRFLSQMK NA  | NA |
| 5   | 15 GAPRFLSSTY NA  | NA |
| 29  | 44 VAPRFLSVNA NA  | NA |
| 40  | 63 LAPRFLSSML NA  | NA |
| 50  | 32 FAPRFLSAQK NA  | NA |
| 16  | 24 PAPRFLSDGW NA  | NA |
| 35  | 42 IAPRFLSQKL NA  | NA |
| 30  | 28 LAPRFLSLWI NA  | NA |
| 42  | 51 MVPKWLTVQV NA  | NA |
| 106 | 128 MVPKWLFIQH NA | NA |
| 49  | 73 MVPKWLASNI NA  | NA |
| 76  | 95 MVPKWLKYLK NA  | NA |
| 74  | 80 MVPKWLHRVG NA  | NA |
| 53  | 83 MVPKWLYGTK NA  | NA |
| 55  | 62 MVPKWLWYMG NA  | NA |
| 49  | 69 MVPKWLWVGY NA  | NA |
| 40  | 48 MVPKWLLDIY NA  | NA |
| 147 | 144 MVPKWLSRAW NA | NA |
| 37  | 64 MVPKWLSANG NA  | NA |
| 56  | 78 RQWRALHKMW NA  | NA |
| 26  | 31 RFPRPITMNG NA  | NA |
| 23  | 32 RFPRPIMDNT NA  | NA |
| 71  | 93 RFPRPIVNWL NA  | NA |
| 33  | 44 RFPRPIQLLY NA  | NA |
| 62  | 67 IDTRWYSGMT NA  | NA |
| 53  | 44 IDTRWYYGEQ NA  | NA |
| 62  | 80 IDTRWYAQGF NA  | NA |
| 92  | 84 IDTRWYSMVH NA  | NA |
| 40  | 46 IDTRWYFMGS NA  | NA |
| 44  | 63 IDTRWYADMV NA  | NA |
| 64  | 77 IDTRWYSRHT NA  | NA |
| 55  | 72 IDTRWYTVQQ NA  | NA |
| 57  | 75 IDTRWYAMGL NA  | NA |
| 62  | 86 IDTRWYFREL NA  | NA |
| 80  | 79 FMPSAQWNIV NA  | NA |
| 71  | 81 FMPSAQYVNV NA  | NA |

|     |     |            |    |    |
|-----|-----|------------|----|----|
| 24  | 19  | NAPMNVVGA  | NA | NA |
| 25  | 30  | VAPMNVGGG  | NA | NA |
| 17  | 10  | VAPMNVRAV  | NA | NA |
| 12  | 24  | VAPMNVKMS  | NA | NA |
| 40  | 32  | DAPMNVGKK  | NA | NA |
| 21  | 21  | TAPMNVYTW  | NA | NA |
| 18  | 14  | WAPMNVNNT  | NA | NA |
| 5   | 5   | EAPMNVSWG  | NA | NA |
| 8   | 4   | AAPMNVGMI  | NA | NA |
| 114 | 161 | SGSRALHOGF | NA | NA |
| 102 | 121 | SGSRALHKRK | NA | NA |
| 65  | 72  | SEPFGLTGHV | NA | NA |
| 110 | 118 | SEPFGLTYHK | NA | NA |
| 147 | 181 | GMPRYMHYML | NA | NA |
| 43  | 53  | GMPRYMWVWY | NA | NA |
| 27  | 30  | QEPRNITSGL | NA | NA |
| 68  | 83  | QEPRNIAYWV | NA | NA |
| 28  | 21  | QEPRNIAAER | NA | NA |
| 48  | 45  | QEPRNIWQWY | NA | NA |
| 24  | 28  | QEPRNITGLG | NA | NA |
| 25  | 27  | QEPRNIALTG | NA | NA |
| 22  | 24  | QEPRNIIYEI | NA | NA |
| 66  | 68  | QEPRNIMQL  | NA | NA |
| 145 | 183 | SWPRNLRLQY | NA | NA |
| 87  | 118 | PKPRNLRLQA | NA | NA |
| 77  | 94  | NIPRNLRLQI | NA | NA |
| 77  | 79  | NAVRNLRLQA | NA | NA |
| 128 | 156 | PSWRALHKQY | NA | NA |
| 96  | 122 | MSWSALHKKR | NA | NA |
| 59  | 65  | HRPRSLMVAW | NA | NA |
| 21  | 32  | HRPRSLMLPI | NA | NA |
| 37  | 43  | HRPRSLIKVS | NA | NA |
| 61  | 78  | HRPRSLFDPH | NA | NA |
| 67  | 79  | HRPRSLMMPS | NA | NA |
| 35  | 36  | HRPRSLQDNH | NA | NA |
| 35  | 57  | HRPRSLYDQA | NA | NA |
| 71  | 73  | HRPRSLFNWI | NA | NA |
| 39  | 41  | HRPRSLFYPF | NA | NA |
| 80  | 87  | HRPRSLTQRG | NA | NA |
| 66  | 80  | DAVYGLHGWI | NA | NA |
| 23  | 37  | DAVYGLHMNG | NA | NA |



|     |     |               |    |
|-----|-----|---------------|----|
| 36  | 39  | GIPLGYTVMT NA | NA |
| 63  | 73  | QSPLGYTVWR NA | NA |
| 34  | 45  | NTPLGYTVVA NA | NA |
| 84  | 79  | GMPLGYTVHQ NA | NA |
| 81  | 102 | VMPLGYTVLH NA | NA |
| 70  | 82  | DRPLGYTVHA NA | NA |
| 95  | 92  | KHPLGYTVWG NA | NA |
| 114 | 137 | FSPLGYTVIW NA | NA |
| 28  | 31  | PRPLGYTVTL NA | NA |
| 26  | 60  | QRPLGYTVWS NA | NA |
| 43  | 68  | PAPLGYTVRQ NA | NA |
| 15  | 24  | MSPRWLWLWT NA | NA |
| 99  | 122 | MSPRWLIAIL NA | NA |
| 97  | 114 | MSPRWLRQWV NA | NA |
| 94  | 108 | MSPRWLWGRF NA | NA |
| 178 | 250 | MSPRWLVYIH NA | NA |
| 50  | 71  | MSPRWLHDIK NA | NA |
| 26  | 40  | MSPRWLQRTA NA | NA |
| 53  | 41  | GTVRNLTMGs NA | NA |
| 54  | 60  | TQVFGLWRAY NA | NA |
| 40  | 76  | VKAYNLHVAL NA | NA |
| 185 | 224 | VKAYNLHNWH NA | NA |
| 41  | 39  | VQWKELRVKR NA | NA |
| 39  | 63  | WKVSSLHMRG NA | NA |
| 43  | 42  | PNPSWLYTES NA | NA |
| 80  | 86  | GRPSWLYTVV NA | NA |
| 35  | 50  | QTPSWLYTTT NA | NA |
| 58  | 71  | EYPSWLYTGG NA | NA |
| 54  | 69  | NQPSWLYTVG NA | NA |
| 115 | 120 | LTPSWLYTHF NA | NA |
| 87  | 114 | CKPSWLYTRY NA | NA |
| 93  | 99  | YPSWLYTVW NA  | NA |
| 16  | 15  | QRPSWLYTKI NA | NA |
| 66  | 71  | DIPSWLYTTQ NA | NA |
| 87  | 84  | KQPSWLYTGI NA | NA |
| 33  | 34  | KSPLGLTYMV NA | NA |
| 45  | 43  | KSPLGLVDSG NA | NA |
| 48  | 50  | YEPRNVYLIK NA | NA |
| 91  | 80  | YEPRNVKRGW NA | NA |
| 104 | 124 | YEPRNVTRRG NA | NA |
| 75  | 91  | YEPRNVQYHT NA | NA |

|     |                   |    |
|-----|-------------------|----|
| 70  | 74 YEPRNVHGWL NA  | NA |
| 43  | 53 YEPRNVLLKT NA  | NA |
| 44  | 41 YEPRNVYDAW NA  | NA |
| 24  | 43 YEPRNVLKGH NA  | NA |
| 79  | 111 YEPRNVHAWH NA | NA |
| 66  | 64 YEPRNVHYLI NA  | NA |
| 37  | 62 YKPAGLHVTV NA  | NA |
| 78  | 111 EVARAWVQWH NA | NA |
| 143 | 150 EVARAWHGTI NA | NA |
| 32  | 32 NTPNWLTRRT NA  | NA |
| 27  | 30 NTPNWLHDEF NA  | NA |
| 34  | 67 RNPEWMYVKG NA  | NA |
| 45  | 51 RNPEWMHNLN NA  | NA |
| 95  | 111 RNPEWMWGTV NA | NA |
| 79  | 72 RNPEWMFDLW NA  | NA |
| 26  | 37 RNPEWMVQMY NA  | NA |
| 21  | 19 RNPEWMIDKG NA  | NA |
| 47  | 48 LDPVALYKQV NA  | NA |
| 52  | 47 ASPVALYKSH NA  | NA |
| 46  | 62 NMPVALYKPS NA  | NA |
| 63  | 83 EAPVALYKLW NA  | NA |
| 36  | 63 NIPVALYKQQ NA  | NA |
| 66  | 52 SQPVALYKQV NA  | NA |
| 15  | 16 DPPVALYKTY NA  | NA |
| 17  | 24 KIPVALYKIG NA  | NA |
| 23  | 21 ESPVALYKQF NA  | NA |
| 54  | 80 YLVRYLHKLW NA  | NA |
| 36  | 44 VPPEAIHAMT NA  | NA |
| 46  | 48 KMPSFLHARS NA  | NA |
| 1   | 4 KMPSFLYDSG NA   | NA |
| 41  | 52 KMPSFLTLEL NA  | NA |
| 33  | 31 KMPSFLWQIV NA  | NA |
| 2   | 4 KMPSFLQLIS NA   | NA |
| 15  | 32 KMPSFLHQGF NA  | NA |
| 48  | 48 QSWYGMHNGS NA  | NA |
| 73  | 74 QSWYGMHYQY NA  | NA |
| 63  | 83 QSWYGMHVTF NA  | NA |
| 25  | 30 FAPLGITLWG NA  | NA |
| 62  | 69 QSPLGITLRV NA  | NA |
| 57  | 59 NFPLGITLKR NA  | NA |
| 39  | 44 GHPLGITLIQ NA  | NA |

|     |     |                |    |
|-----|-----|----------------|----|
| 10  | 11  | SAPLGITLAA NA  | NA |
| 13  | 27  | TDPLGITLAS NA  | NA |
| 24  | 29  | GDPLGITLGF NA  | NA |
| 49  | 63  | DAPLGITLHI NA  | NA |
| 41  | 40  | GAPLGITLKR NA  | NA |
| 20  | 26  | PPPLGITLVQ NA  | NA |
| 31  | 39  | YSATNLHQNG NA  | NA |
| 38  | 53  | RPPSSLWGLW NA  | NA |
| 55  | 47  | RPPSSLHATK NA  | NA |
| 50  | 54  | RPPSSLHVMV NA  | NA |
| 72  | 94  | LTPRYWHQLA NA  | NA |
| 122 | 119 | LTPRYWHAGT NA  | NA |
| 174 | 234 | FWPRPLYHEK NA  | NA |
| 433 | 561 | IHPRPLYHHT NA  | NA |
| 105 | 139 | PYPRPLYHIL NA  | NA |
| 77  | 94  | P DPRPLYHTL NA | NA |
| 88  | 99  | VTPRPLYHKT NA  | NA |
| 38  | 54  | LRPRPLYHQV NA  | NA |
| 186 | 212 | AIPRPLYHRL NA  | NA |
| 112 | 149 | WHPRPLYHGG NA  | NA |
| 192 | 220 | MKPRPLYHSF NA  | NA |
| 54  | 85  | HSPRPLYHKG NA  | NA |
| 63  | 52  | SQPTGLYGRL NA  | NA |
| 52  | 61  | SQPTGLHDLG NA  | NA |
| 34  | 51  | SQPTGLYYPF NA  | NA |
| 79  | 91  | HWPVGLRDWL NA  | NA |
| 106 | 119 | HWPVGLTGHI NA  | NA |
| 63  | 82  | HWPVGLVSGK NA  | NA |
| 71  | 102 | HWPVGLMKVI NA  | NA |
| 38  | 56  | HWPVGLQGEI NA  | NA |
| 71  | 110 | HWPVGLYDER NA  | NA |
| 49  | 49  | HWPVGLQQVT NA  | NA |
| 55  | 76  | SLPTSLWQIA NA  | NA |
| 176 | 222 | RQVRYLHYHF NA  | NA |
| 155 | 214 | RQVRYLHVNA NA  | NA |
| 30  | 27  | TIPRWMKGES NA  | NA |
| 12  | 14  | YAPRWMKGVK NA  | NA |
| 52  | 62  | NKPRWMKGNG NA  | NA |
| 105 | 131 | YFPRWMKGWR NA  | NA |
| 28  | 44  | EAPRWMKGHG NA  | NA |
| 69  | 83  | SWPRWMKGGH NA  | NA |

|     |     |                |    |
|-----|-----|----------------|----|
| 56  | 78  | WDPRWMKGMR NA  | NA |
| 85  | 100 | MYPRWMKGLV NA  | NA |
| 47  | 73  | SSPRWMKGIW NA  | NA |
| 25  | 24  | GFPRWMKGRS NA  | NA |
| 52  | 55  | YYPRWMKGSB NA  | NA |
| 87  | 93  | TVPRAWHSIR NA  | NA |
| 71  | 109 | TVPRAWHMVK NA  | NA |
| 43  | 37  | TVPRAWSSSF NA  | NA |
| 52  | 65  | TVPRAWTGTF NA  | NA |
| 47  | 39  | RTPVGLHVNT NA  | NA |
| 76  | 83  | RTPVGLVYPH NA  | NA |
| 40  | 39  | RTPVGLRLKF NA  | NA |
| 25  | 30  | RTPVGLTGMH NA  | NA |
| 32  | 21  | RTPVGLWATV NA  | NA |
| 67  | 65  | RTPVGLYRRH NA  | NA |
| 36  | 44  | RTPVGLWSVG NA  | NA |
| 103 | 148 | VMVWNIHAHY NA  | NA |
| 39  | 57  | GSVWALHNKV NA  | NA |
| 88  | 112 | PMVRWLRYKH NA  | NA |
| 59  | 66  | PMVRWLWRWS NA  | NA |
| 82  | 77  | PMVRWLFYNK NA  | NA |
| 95  | 90  | PMVRWLARGL NA  | NA |
| 38  | 40  | PMVRWLSGSF NA  | NA |
| 25  | 49  | PMVRWLALVW NA  | NA |
| 94  | 92  | PMVRWLMYGL NA  | NA |
| 42  | 51  | PMVRWLTGNL NA  | NA |
| 48  | 52  | PMVRWLWKIQ NA  | NA |
| 51  | 55  | PMVRWLAQKV NA  | NA |
| 114 | 140 | TRLAHVHBSVG NA | NA |
| 65  | 101 | VLPRSWHGLL NA  | NA |
| 46  | 53  | VLPRSWHDSI NA  | NA |
| 46  | 70  | RGPYHLHKQR NA  | NA |
| 44  | 42  | PNVRNLINNG NA  | NA |
| 34  | 27  | DNVRNLINTQ NA  | NA |
| 50  | 50  | HNVRNLIKNR NA  | NA |
| 33  | 38  | TNVRNLIDIG NA  | NA |
| 47  | 49  | VNVRNLIVGY NA  | NA |
| 49  | 53  | RNVRNLIDGH NA  | NA |
| 45  | 51  | VNVRNLIAWS NA  | NA |
| 44  | 48  | DNVRNLIAKI NA  | NA |
| 29  | 37  | GNVRNLIGGI NA  | NA |

|     |     |               |    |
|-----|-----|---------------|----|
| 98  | 122 | GMPWSVQSGW NA | NA |
| 50  | 79  | GMPWSVHVQG NA | NA |
| 64  | 87  | GMPWSVWKSQ NA | NA |
| 29  | 35  | GMPWSVWVWI NA | NA |
| 81  | 119 | GMPWSVQYQW NA | NA |
| 67  | 86  | SLPRPLRGGH NA | NA |
| 57  | 61  | SLPRPLWYRK NA | NA |
| 29  | 36  | SLPRPLTKRS NA | NA |
| 44  | 31  | SLPRPLVAQT NA | NA |
| 80  | 62  | SLPRPLIVRL NA | NA |
| 64  | 64  | SLPRPLAGWG NA | NA |
| 58  | 69  | SLPRPLRAVL NA | NA |
| 87  | 72  | SLPRPLRDGK NA | NA |
| 36  | 33  | TFARSLWLLW NA | NA |
| 104 | 117 | AGVRYLHVMY NA | NA |
| 45  | 57  | FSARSLTMIW NA | NA |
| 33  | 35  | FSARSLTDSW NA | NA |
| 138 | 165 | TGVSWLRYHL NA | NA |
| 24  | 13  | TGVSWLMAIS NA | NA |
| 24  | 53  | TGVSWLFGEG NA | NA |
| 38  | 26  | TGVSWLMVHL NA | NA |
| 55  | 65  | PGPESLHMGE NA | NA |
| 55  | 59  | RDVLALHLTV NA | NA |
| 54  | 70  | TTPSWLTMRI NA | NA |
| 35  | 39  | TTPSWLHVAA NA | NA |
| 57  | 66  | QKVLNMHQIV NA | NA |
| 25  | 23  | QKVLNMHDLQ NA | NA |
| 212 | 307 | PQHKALRVQL NA | NA |
| 92  | 94  | IPGVALTMPL NA | NA |
| 66  | 71  | TKVLWLWKGK NA | NA |
| 144 | 167 | HYPSSLHAMA NA | NA |
| 82  | 89  | HYPSSLWVRT NA | NA |
| 95  | 110 | HYPSSLWGQQ NA | NA |
| 119 | 133 | HYPSSLHSHH NA | NA |
| 47  | 55  | STPKQLTRNV NA | NA |
| 35  | 59  | EHPKQLTRNG NA | NA |
| 72  | 72  | EWPKQLTRRT NA | NA |
| 35  | 37  | QKPKQLTRLQ NA | NA |
| 66  | 65  | PMPKQLTRTF NA | NA |
| 50  | 63  | MFPKQLTRMG NA | NA |
| 30  | 39  | LNPKQLTRNI NA | NA |

|     |                   |    |
|-----|-------------------|----|
| 60  | 85 HNPQLTRRG NA   | NA |
| 50  | 42 NDPQLTRLY NA   | NA |
| 42  | 44 VTPQLTRGK NA   | NA |
| 18  | 17 FIVRALISEF NA  | NA |
| 190 | 211 YHVRALISGW NA | NA |
| 16  | 25 EIVRALISRG NA  | NA |
| 47  | 49 NDVRALISGQ NA  | NA |
| 38  | 51 DYVRALISTV NA  | NA |
| 53  | 48 VKVRALISHI NA  | NA |
| 40  | 27 CSVRALISST NA  | NA |
| 14  | 11 IWVRALISLH NA  | NA |
| 35  | 42 VFVRALISTG NA  | NA |
| 41  | 37 GAVRALISQT NA  | NA |
| 31  | 26 GDPLASTVAG NA  | NA |
| 24  | 33 YYPLASTVGS NA  | NA |
| 46  | 49 TWPLASTVLG NA  | NA |
| 62  | 74 RTPLASTVAW NA  | NA |
| 44  | 56 WSPLASTVKG NA  | NA |
| 29  | 58 RPPLASTVER NA  | NA |
| 40  | 85 CPPLASTVWS NA  | NA |
| 31  | 45 QTPLASTVGY NA  | NA |
| 55  | 59 TNPLASTVKV NA  | NA |
| 43  | 54 DQPLASTVIV NA  | NA |
| 65  | 75 CSVRALQVPT NA  | NA |
| 91  | 122 PVVWWQYNWG NA | NA |
| 72  | 64 PVVWWQRAVS NA  | NA |
| 80  | 80 PVVWWQWGHK NA  | NA |
| 64  | 81 PVVWWQFYIT NA  | NA |
| 48  | 55 PVVWWQMQGF NA  | NA |
| 129 | 138 PVVWWQMKEK NA | NA |
| 87  | 85 PVVWWQIVQS NA  | NA |
| 64  | 92 HLPTALQGGW NA  | NA |
| 73  | 106 HLPTALQDHW NA | NA |
| 33  | 45 GSPVQLTGLT NA  | NA |
| 43  | 60 PSPVQLTGTK NA  | NA |
| 36  | 36 GSPVQLTGGF NA  | NA |
| 25  | 25 VSPVQLTVSA NA  | NA |
| 20  | 12 GSPVQLTNGF NA  | NA |
| 28  | 42 SSPVQLTRHV NA  | NA |
| 29  | 24 TSPVQLTAKS NA  | NA |
| 25  | 13 PSPVQLTRPI NA  | NA |

|     |     |                |    |
|-----|-----|----------------|----|
| 24  | 22  | TSPVQLTGNY NA  | NA |
| 49  | 57  | TTPLGQIMWH NA  | NA |
| 47  | 35  | KTPLGQISNF NA  | NA |
| 21  | 38  | RTPLGQIGTI NA  | NA |
| 39  | 38  | ATPLGQISVG NA  | NA |
| 16  | 34  | ATPLGQINGI NA  | NA |
| 42  | 57  | FTPLGQISML NA  | NA |
| 19  | 31  | GTPLGQIGEG NA  | NA |
| 61  | 69  | QTPLGQIYMQ NA  | NA |
| 38  | 48  | ETPLGQIGTH NA  | NA |
| 34  | 46  | NTPLGQIYRQ NA  | NA |
| 31  | 42  | ATASFLWNVY NA  | NA |
| 36  | 37  | MKPVNLMAQF NA  | NA |
| 45  | 65  | MKPVNLVGSW NA  | NA |
| 77  | 96  | MKPVNLFKAL NA  | NA |
| 100 | 129 | MKPVNLVRRRI NA | NA |
| 84  | 99  | MKPVNLFQLH NA  | NA |
| 74  | 115 | MKPVNLWRSR NA  | NA |
| 103 | 106 | MKPVNLRGWI NA  | NA |
| 41  | 64  | MKPVNLTDWA NA  | NA |
| 22  | 28  | QSPVQLWMGG NA  | NA |
| 33  | 58  | QSPVQLWGLA NA  | NA |
| 54  | 87  | QSPVQLWSAH NA  | NA |
| 49  | 48  | QSPVQLYGIV NA  | NA |
| 42  | 46  | QSPVQLYDTQ NA  | NA |
| 44  | 51  | FTPLNMTLIR NA  | NA |
| 24  | 27  | TAPINLTGLA NA  | NA |
| 27  | 28  | TAPINLWSRW NA  | NA |
| 13  | 12  | TAPINLTDNW NA  | NA |
| 18  | 19  | TAPINLHVTF NA  | NA |
| 82  | 97  | APVYALHYWR NA  | NA |
| 150 | 159 | APVYALHYHH NA  | NA |
| 79  | 84  | CVAKPLWYKK NA  | NA |
| 83  | 123 | AVAKPLWDWH NA  | NA |
| 58  | 58  | VVAKPLWYKT NA  | NA |
| 70  | 92  | SVAKPLWDWR NA  | NA |
| 44  | 42  | AVAKPLWVVS NA  | NA |
| 56  | 69  | PVAKPLWGTV NA  | NA |
| 55  | 82  | KVAKPLWNWI NA  | NA |
| 32  | 50  | YVAKPLWSKQ NA  | NA |
| 113 | 155 | WVAKPLWQGT NA  | NA |

|     |     |               |    |
|-----|-----|---------------|----|
| 56  | 78  | MVPSALWRGV NA | NA |
| 36  | 52  | MVPSALQSPS NA | NA |
| 129 | 168 | GTVRALRMWI NA | NA |
| 56  | 58  | SMPRMLHLKI NA | NA |
| 66  | 79  | SMPRMLHGIG NA | NA |
| 75  | 63  | PGVRFLWNPI NA | NA |
| 98  | 100 | PGVRFLYAIV NA | NA |
| 46  | 61  | SAVRALYVPK NA | NA |
| 112 | 152 | SAVRALRNAS NA | NA |
| 65  | 81  | SAVRALHGPF NA | NA |
| 44  | 76  | SAVRALTYGS NA | NA |
| 112 | 108 | SAVRALQYRY NA | NA |
| 46  | 47  | SAVRALTLKA NA | NA |
| 112 | 162 | SAVRALHSMS NA | NA |
| 60  | 66  | SAVRALYDGA NA | NA |
| 46  | 65  | SAVRALMDGY NA | NA |
| 49  | 46  | VVAVSLWKIR NA | NA |
| 56  | 70  | SVARNLYLMV NA | NA |
| 34  | 29  | SVARNLTATF NA | NA |
| 29  | 42  | SVARNLHDQI NA | NA |
| 91  | 119 | SVARNLWSTK NA | NA |
| 27  | 29  | SPPLAVRRTL NA | NA |
| 33  | 30  | CPPLAVRTEL NA | NA |
| 39  | 47  | VAPLAVRTEH NA | NA |
| 43  | 59  | NNPLAVRTHT NA | NA |
| 48  | 88  | DIPLAVRTMR NA | NA |
| 41  | 63  | TMPLAVRTNF NA | NA |
| 27  | 44  | GPPLAVRTHY NA | NA |
| 111 | 140 | RWPLAVRTSR NA | NA |
| 32  | 44  | NYPLAVRTEF NA | NA |
| 72  | 111 | IFPLAVRTAR NA | NA |
| 91  | 100 | FIARALTRGQ NA | NA |
| 78  | 81  | FIARALVRKY NA | NA |
| 37  | 43  | FIARALILAS NA | NA |
| 148 | 190 | FIARALHMQT NA | NA |
| 29  | 45  | YFARQLTYRV NA | NA |
| 75  | 101 | YFARQLWQNF NA | NA |
| 59  | 62  | YFARQLTNWY NA | NA |
| 45  | 55  | ISPVWLRVWL NA | NA |
| 93  | 104 | CSPVWLRAEH NA | NA |
| 34  | 37  | DSPVWLRSIK NA | NA |



|     |     |            |    |    |
|-----|-----|------------|----|----|
| 78  | 101 | CSPVWLRKPS | NA | NA |
| 57  | 73  | WSPVWLRRL  | NA | NA |
| 43  | 78  | SSPVWLRMKQ | NA | NA |
| 64  | 94  | TSPVWLRGHK | NA | NA |
| 21  | 40  | ISPVWLRGSY | NA | NA |
| 47  | 58  | FSPVWLRNNH | NA | NA |
| 52  | 73  | ISPVWLRSHS | NA | NA |
| 80  | 90  | LPTRWLHdry | NA | NA |
| 65  | 70  | LPTRWLTRGH | NA | NA |
| 85  | 108 | LPTRWLWQRL | NA | NA |
| 117 | 116 | TVLRSLHYAQ | NA | NA |
| 17  | 31  | RYPVNMYAQQ | NA | NA |
| 49  | 48  | RYPVNMMLGG | NA | NA |
| 49  | 49  | RYPVNMQRQQ | NA | NA |
| 33  | 43  | RYPVNMAGGK | NA | NA |
| 36  | 48  | RYPVNMQQGS | NA | NA |
| 37  | 48  | RYPVNMQIQ  | NA | NA |
| 57  | 70  | NRPSALHDPY | NA | NA |
| 89  | 115 | NRPSALHNWQ | NA | NA |
| 27  | 27  | NRPSALQQEG | NA | NA |
| 106 | 92  | QVRALRLTR  | NA | NA |
| 158 | 190 | EQVRALRGHQ | NA | NA |
| 90  | 101 | KQVRALRNAR | NA | NA |
| 66  | 96  | KQVRALRGEL | NA | NA |
| 70  | 61  | GQVRALRNIS | NA | NA |
| 45  | 57  | GQVRALRNWK | NA | NA |
| 111 | 127 | PQVRALRMVG | NA | NA |
| 132 | 151 | IQVRALRGHS | NA | NA |
| 248 | 271 | NQVRALRLNT | NA | NA |
| 69  | 96  | NQVRALRYSF | NA | NA |
| 62  | 65  | AQVRALRGQG | NA | NA |
| 39  | 35  | VHAVWLTRVG | NA | NA |
| 77  | 88  | VHAVWLHGPO | NA | NA |
| 34  | 48  | VHAVWLVRIW | NA | NA |
| 90  | 82  | VHAVWLVNHV | NA | NA |
| 21  | 26  | PSPRAITLKY | NA | NA |
| 28  | 35  | PSPRAITGQS | NA | NA |
| 5   | 8   | PSPRAIQAPG | NA | NA |
| 17  | 27  | PSPRAIWKEQ | NA | NA |
| 31  | 46  | PSPRAIYVPY | NA | NA |
| 35  | 38  | PSPRAIALAV | NA | NA |

|     |     |                |    |
|-----|-----|----------------|----|
| 20  | 37  | PSPRAIQLLK NA  | NA |
| 45  | 38  | RDVLWLTNTG NA  | NA |
| 36  | 52  | RDVLWLHQGS NA  | NA |
| 34  | 29  | STVRNLIMPQ NA  | NA |
| 47  | 44  | STVRNLTQQG NA  | NA |
| 45  | 52  | STVRNLFKMF NA  | NA |
| 55  | 66  | STVRNLTQLH NA  | NA |
| 68  | 89  | STVRNLRKWF NA  | NA |
| 33  | 31  | RVPRGLTGQH NA  | NA |
| 22  | 19  | RVPRGLTYTI NA  | NA |
| 12  | 10  | RVPRGLTYSI NA  | NA |
| 40  | 70  | RVPRGLQYSV NA  | NA |
| 39  | 47  | RVPRGLWDKA NA  | NA |
| 26  | 36  | QVPVFLAGEW NA  | NA |
| 68  | 61  | QVPVFLWNSK NA  | NA |
| 50  | 60  | QVPVFLVQTS NA  | NA |
| 64  | 58  | QVPVFLTDHR NA  | NA |
| 72  | 56  | QVPVFLFQNQ NA  | NA |
| 39  | 86  | SQPYNLRGLH NA  | NA |
| 58  | 47  | FHPYNLRGVS NA  | NA |
| 116 | 119 | FHPYNLRGQY NA  | NA |
| 73  | 90  | EYPYNLRGQV NA  | NA |
| 23  | 23  | ERPYNLRGAG NA  | NA |
| 43  | 28  | PPYNLRGGS NA   | NA |
| 49  | 75  | YYPYNLRGMI NA  | NA |
| 26  | 27  | GPPYNLRGTK NA  | NA |
| 41  | 71  | MIPYNLRGAK NA  | NA |
| 75  | 89  | DHPYNLRGMS NA  | NA |
| 31  | 24  | YLPRAITSAS NA  | NA |
| 54  | 51  | YLPRAIWQKG NA  | NA |
| 77  | 82  | YLPRAIRGWI NA  | NA |
| 51  | 70  | YLPRAIMGTH NA  | NA |
| 28  | 43  | YLPRAITSHF NA  | NA |
| 68  | 63  | YLPRAIWNGA NA  | NA |
| 36  | 48  | YLPRAIHDRQ NA  | NA |
| 26  | 29  | QKVRNLTYPY NA  | NA |
| 52  | 67  | AKVRNLTQNR NA  | NA |
| 46  | 69  | NKVRNLTGKY NA  | NA |
| 44  | 66  | QKVRNLTLLF NA  | NA |
| 89  | 120 | IKVRNLTARF NA  | NA |
| 41  | 46  | GKVRNLT LGV NA | NA |

|     |                |    |    |
|-----|----------------|----|----|
| 68  | 63 SKVRNLTMP   | NA | NA |
| 130 | 144 MKVRNLTL   | NA | NA |
| 103 | 89 TKVRNLTRL   | NA | NA |
| 61  | 71 SRVRNLVAE   | NA | NA |
| 105 | 125 SRVRNLAL   | NA | NA |
| 69  | 76 SRVRNLWVG   | NA | NA |
| 14  | 24 SRVRNLYVG   | NA | NA |
| 48  | 84 SRVRNLHGH   | NA | NA |
| 66  | 82 SRVRNLVMR   | NA | NA |
| 72  | 65 SRVRNLAAG   | NA | NA |
| 36  | 39 EVTMWLWAG   | NA | NA |
| 48  | 45 EVTMWLWAR   | NA | NA |
| 76  | 84 WHPAGMHSH   | NA | NA |
| 105 | 117 CFPAGMHSS  | NA | NA |
| 21  | 24 GPPAGMHSG   | NA | NA |
| 41  | 54 GQPAGMHSI   | NA | NA |
| 71  | 108 MNPAGMHSP  | NA | NA |
| 38  | 59 GNPAGMHSG   | NA | NA |
| 44  | 56 YTPAGMHST   | NA | NA |
| 52  | 54 HWPRFLFYA   | NA | NA |
| 46  | 52 HWPRFLTVQ   | NA | NA |
| 26  | 53 HWPRFLMLT   | NA | NA |
| 84  | 98 HWPRFLINP   | NA | NA |
| 59  | 71 HWPRFLAVM   | NA | NA |
| 84  | 89 HWPRFLYLGA  | NA | NA |
| 125 | 144 HWPRFLMVR  | NA | NA |
| 183 | 200 TAVRSLHRR  | NA | NA |
| 40  | 53 TAVRSLHMNV  | NA | NA |
| 66  | 71 TAVRSLWNSH  | NA | NA |
| 56  | 61 TAVRSLYGLH  | NA | NA |
| 85  | 92 TAVRSLWDGW  | NA | NA |
| 75  | 97 TAVRSLHLTW  | NA | NA |
| 30  | 30 TAVRSLWYTK  | NA | NA |
| 62  | 71 NKVRFMRQLG  | NA | NA |
| 129 | 156 MKVRFMRQ   | NA | NA |
| 34  | 35 FFVRFMRQWG  | NA | NA |
| 128 | 127 DKVRFMRQMR | NA | NA |
| 21  | 36 KRVRFMRQEF  | NA | NA |
| 110 | 115 GHVRFMRQAK | NA | NA |
| 65  | 88 LYVRFMRQHR  | NA | NA |
| 23  | 35 ETVRFMRQOK  | NA | NA |

|     |     |               |    |
|-----|-----|---------------|----|
| 60  | 68  | DSVRFMRQGS NA | NA |
| 51  | 50  | YTVRFMRQWG NA | NA |
| 14  | 11  | RGPVFLHGWG NA | NA |
| 24  | 20  | RGPVFLYSNS NA | NA |
| 43  | 43  | RGPVFLMLSQ NA | NA |
| 45  | 38  | RGPVFLRVGI NA | NA |
| 17  | 24  | RGPVFLFGGG NA | NA |
| 55  | 65  | KMPRWIVLLG NA | NA |
| 63  | 64  | KMPRWIIQNL NA | NA |
| 70  | 70  | KMPRWISDNR NA | NA |
| 49  | 59  | KMPRWIMNKS NA | NA |
| 67  | 69  | KMPRWIMQES NA | NA |
| 60  | 50  | KMPRWIMMQS NA | NA |
| 89  | 88  | KMPRWIRSIT NA | NA |
| 13  | 14  | KMPRWIHSSY NA | NA |
| 87  | 92  | KMPRWIVAAQ NA | NA |
| 65  | 79  | VNVRNLRSKL NA | NA |
| 15  | 19  | VNVRNLTGSV NA | NA |
| 57  | 52  | VNVRNLWQVV NA | NA |
| 77  | 98  | VNVRNLRGLH NA | NA |
| 71  | 96  | VNVRNLYMRT NA | NA |
| 61  | 70  | VNVRNLHKER NA | NA |
| 83  | 81  | DYARAMMQPS NA | NA |
| 43  | 84  | DYARAMTYPY NA | NA |
| 38  | 39  | DYARAMYKAI NA | NA |
| 65  | 94  | DYARAMMKVL NA | NA |
| 53  | 77  | DYARAMTNEH NA | NA |
| 41  | 42  | DYARAMVDQK NA | NA |
| 46  | 54  | DYARAMYSSV NA | NA |
| 104 | 133 | DYARAMTGWF NA | NA |
| 61  | 67  | DYARAMMCLK NA | NA |
| 33  | 58  | KSPRMLYGLH NA | NA |
| 42  | 52  | KSPRMLYNLI NA | NA |
| 46  | 61  | KSPRMLYSRY NA | NA |
| 52  | 61  | KSPRMLHLKY NA | NA |
| 60  | 72  | TTALWLTQRQ NA | NA |
| 82  | 89  | TTALWLTAHR NA | NA |
| 68  | 61  | SRPRMLYKQY NA | NA |
| 100 | 133 | SRPRMLVKEK NA | NA |
| 45  | 67  | SRPRMLVKSQ NA | NA |
| 66  | 60  | SRPRMLHQPT NA | NA |

|     |                   |    |
|-----|-------------------|----|
| 46  | 60 SRPRMLVDQA NA  | NA |
| 58  | 71 ITVKFLFNIK NA  | NA |
| 86  | 77 HAVKFLFN RV NA | NA |
| 49  | 47 QFVKFLFNPI NA  | NA |
| 56  | 79 SPVKFLFNLA NA  | NA |
| 24  | 44 NMVKFLFN RH NA | NA |
| 45  | 63 SNVKFLFN RG NA | NA |
| 38  | 35 VHKFLFN LG NA  | NA |
| 21  | 25 ADVKFLFN IG NA | NA |
| 14  | 16 WYVKFLFN AF NA | NA |
| 13  | 11 FYVKFLFN WS NA | NA |
| 89  | 117 KHVRRLTLKW NA | NA |
| 31  | 36 MHGVALTSRF NA  | NA |
| 72  | 83 HRIKAYTMVA NA  | NA |
| 61  | 62 CKSKAYTMVA NA  | NA |
| 55  | 60 EWPINLTFLA NA  | NA |
| 64  | 89 WIWKALREKV NA  | NA |
| 75  | 93 ESPSFLHLRL NA  | NA |
| 15  | 16 ESPSFLQLNG NA  | NA |
| 11  | 11 ESPSFLYKVH NA  | NA |
| 8   | 10 ESPSFLTLKA NA  | NA |
| 41  | 48 RRVLALHQWA NA  | NA |
| 139 | 197 PSPRYLHRTW NA | NA |
| 127 | 173 PSPRYLHMQI NA | NA |
| 45  | 45 PSPRYLWAVA NA  | NA |
| 36  | 41 QAVKQLRREY NA  | NA |
| 46  | 58 DYWKSLTFNT NA  | NA |
| 56  | 65 RWPWLWDVQ NA   | NA |
| 50  | 67 KAPLKLRLGT NA  | NA |
| 5   | 8 KAPLKLTVSR NA   | NA |
| 5   | 6 KAPLKLTD SG NA  | NA |
| 52  | 39 YSPSLITVVV NA  | NA |
| 127 | 119 KPVSALHNRG NA | NA |
| 60  | 62 RVPKLLWKHQ NA  | NA |
| 29  | 51 RVPKLLMNWG NA  | NA |
| 34  | 38 RVPKLLKLTH NA  | NA |
| 30  | 50 RVPKLLAMVS NA  | NA |
| 30  | 34 RVPKLLKGSR NA  | NA |
| 47  | 46 RVPKLLFAKF NA  | NA |
| 34  | 38 RVPKLLVNTW NA  | NA |
| 30  | 25 RVPKLLKAKS NA  | NA |

|     |                   |    |
|-----|-------------------|----|
| 56  | 67 RVPKLLHRNY NA  | NA |
| 32  | 56 RVPKLLVYGY NA  | NA |
| 39  | 40 RGVWKLWSES NA  | NA |
| 53  | 60 YDPHYLMMLT NA  | NA |
| 92  | 108 KQPHYLMMRQ NA | NA |
| 102 | 112 YYPHYLMMRI NA | NA |
| 105 | 110 AHPHYLMMGT NA | NA |
| 21  | 22 APPHYLMMNA NA  | NA |
| 63  | 72 AWPHYLMMQH NA  | NA |
| 80  | 81 SRPHYLMMKQ NA  | NA |
| 91  | 85 WSPHYLMMLK NA  | NA |
| 71  | 71 LNPHYLMMTL NA  | NA |
| 100 | 117 YYPHYLMMKG NA | NA |
| 75  | 115 VLFGALRGAR NA | NA |
| 50  | 56 VLFGALANGL NA  | NA |
| 145 | 197 ESIRGLRRML NA | NA |
| 55  | 56 ESIRGLQVGT NA  | NA |
| 32  | 40 ESIRGLMRSG NA  | NA |
| 22  | 37 ESIRGLAVIW NA  | NA |
| 48  | 49 ESIRGLANMI NA  | NA |
| 51  | 52 ESIRGLWKIW NA  | NA |
| 51  | 58 ESIRGLTMRA NA  | NA |
| 24  | 27 ESIRGLQVGG NA  | NA |
| 51  | 66 ESIRGLSMGG NA  | NA |
| 8   | 15 NAPNALSSSA NA  | NA |
| 17  | 25 NAPNALMKT I NA | NA |
| 25  | 26 NAPNALAYGR NA  | NA |
| 11  | 14 NAPNALT LKG NA | NA |
| 3   | 4 NAPNALLSKF NA   | NA |
| 14  | 22 NAPNALWGQH NA  | NA |
| 30  | 42 LQIGHLLQEY NA  | NA |
| 49  | 63 LQIGHLWAAF NA  | NA |
| 26  | 39 LQIGHLLGHF NA  | NA |
| 29  | 30 LQIGHLLLIV NA  | NA |
| 70  | 101 PCPTGLSNML NA | NA |
| 79  | 64 PCPTGLSKRA NA  | NA |
| 58  | 68 PCPTGLSQGV NA  | NA |
| 79  | 109 PCPTGLIRQR NA | NA |
| 28  | 47 PCPTGLWQQA NA  | NA |
| 43  | 63 FQIGSLWRIQ NA  | NA |
| 47  | 44 RVVANLSLVF NA  | NA |

|     |     |               |    |
|-----|-----|---------------|----|
| 13  | 26  | WAINALWMTF NA | NA |
| 27  | 39  | WAINALWVKY NA | NA |
| 42  | 50  | KSPTGLAKKQ NA | NA |
| 19  | 23  | KSPTGLQKTH NA | NA |
| 22  | 20  | KSPTGLIGAG NA | NA |
| 30  | 39  | KSPTGLAKSA NA | NA |
| 45  | 64  | KSPTGLSYRI NA | NA |
| 27  | 20  | KSPTGLAVIT NA | NA |
| 47  | 47  | KSPTGLLSGR NA | NA |
| 27  | 35  | QRPMDLRGPQ NA | NA |
| 65  | 89  | PKLAAIWQKR NA | NA |
| 51  | 57  | PQMGSLWMSQ NA | NA |
| 36  | 55  | PQMGSLWYQT NA | NA |
| 63  | 89  | LVVGALRMTW NA | NA |
| 161 | 185 | VVVGALRYGV NA | NA |
| 46  | 64  | EVVGALRQKV NA | NA |
| 43  | 46  | GVVGALRYPF NA | NA |
| 93  | 103 | CVVGALRGRK NA | NA |
| 115 | 117 | WVVGALRLPH NA | NA |
| 88  | 82  | KVVGALRSEQ NA | NA |
| 26  | 26  | GVVGALRSIS NA | NA |
| 44  | 59  | EVVGALRDSA NA | NA |
| 146 | 186 | LVVGALRMRQ NA | NA |
| 85  | 93  | YVVGALRMAI NA | NA |
| 45  | 50  | WDIRSLTNLY NA | NA |
| 48  | 38  | LPPLGFAMEL NA | NA |
| 32  | 21  | LPPLGFRSML NA | NA |
| 20  | 28  | RMPLGLRAPA NA | NA |
| 101 | 150 | RMPLGLRQWA NA | NA |
| 74  | 86  | GMPLGLRNHW NA | NA |
| 92  | 96  | TMPLGLRKLL NA | NA |
| 46  | 73  | FMPLGLRGIK NA | NA |
| 30  | 33  | FMPLGLRDVG NA | NA |
| 34  | 40  | QMPLGLRSHH NA | NA |
| 53  | 64  | YMPLGLRQPI NA | NA |
| 37  | 33  | VMPLGLRKNY NA | NA |
| 122 | 160 | HMPLGLRVGL NA | NA |
| 18  | 22  | ATLAALWGWG NA | NA |
| 126 | 133 | CVPRYLRMKW NA | NA |
| 157 | 166 | HVPRYLNRWH NA | NA |
| 78  | 104 | TVPRYLNRQH NA | NA |

|     |     |                 |    |
|-----|-----|-----------------|----|
| 39  | 55  | NVPRYLARNPY NA  | NA |
| 65  | 69  | EVPRYL RVGR NA  | NA |
| 96  | 143 | MVPRYL RMGH NA  | NA |
| 65  | 84  | GVPRYL RRER NA  | NA |
| 90  | 104 | HVPRYL RGGH NA  | NA |
| 94  | 115 | HVPRYL RSAF NA  | NA |
| 52  | 91  | PVPRYL RSML NA  | NA |
| 67  | 89  | GVPRYL RKRG NA  | NA |
| 40  | 54  | ARPRSL LYLR NA  | NA |
| 39  | 38  | MRPRSL LGKI NA  | NA |
| 20  | 23  | ARPRSL LGKG NA  | NA |
| 51  | 67  | FRPRSL LAVR NA  | NA |
| 56  | 71  | ERPRSL LGRY NA  | NA |
| 28  | 32  | QRPRSL LYGI NA  | NA |
| 31  | 38  | RRPRSL LKKA NA  | NA |
| 36  | 43  | DRPRSL LYEI NA  | NA |
| 40  | 57  | VRPRSL LKMI NA  | NA |
| 53  | 88  | GRPRSL LRAW NA  | NA |
| 12  | 8   | TRPRSL LGPY NA  | NA |
| 20  | 23  | YGPRAI IYGL NA  | NA |
| 22  | 17  | YGPRAI SMEA NA  | NA |
| 34  | 57  | AYPAGL RAEV NA  | NA |
| 96  | 83  | NYPAGL RMKV NA  | NA |
| 62  | 72  | WYPAGL RRPY NA  | NA |
| 34  | 40  | QYPAGL RKEG NA  | NA |
| 51  | 98  | MYPAGL RNTY NA  | NA |
| 75  | 92  | NYPAGL RVTQ NA  | NA |
| 120 | 146 | MYPAGL RVQL NA  | NA |
| 333 | 435 | YYPAGL RRAR NA  | NA |
| 49  | 68  | KYPAGL RGS I NA | NA |
| 59  | 66  | WYPAGL RMVK NA  | NA |
| 21  | 24  | KAPAHLSANL NA   | NA |
| 11  | 22  | KAPAHLSNGR NA   | NA |
| 41  | 45  | QPPHAFQQWI NA   | NA |
| 14  | 20  | QPPHAFQQIV NA   | NA |
| 48  | 48  | VKVRAIRQGG NA   | NA |
| 38  | 48  | VRVRAIRQGG NA   | NA |
| 52  | 53  | KIVRAIRQSR NA   | NA |
| 42  | 55  | GMVRAIRQKH NA   | NA |
| 54  | 80  | WAVRAIRQAG NA   | NA |
| 65  | 61  | RYVRAIRQMR NA   | NA |



|     |                   |    |
|-----|-------------------|----|
| 58  | 59 ASVRAIRQRY NA  | NA |
| 36  | 39 NAVRAIRQGG NA  | NA |
| 40  | 32 LAVRAIRQGG NA  | NA |
| 55  | 71 GWVRAIRQPW NA  | NA |
| 54  | 82 LAVRAIRQRS NA  | NA |
| 6   | 5 FLPRMLAYNT NA   | NA |
| 15  | 18 FLPRMLWAIT NA  | NA |
| 46  | 68 FLPRMLWKKQ NA  | NA |
| 14  | 20 FLPRMLTGMV NA  | NA |
| 38  | 62 LIPTSLLYHG NA  | NA |
| 15  | 9 RMWRAFWVWF NA   | NA |
| 98  | 142 RMWRAFQGAA NA | NA |
| 32  | 40 RMWRAFRKLN NA  | NA |
| 100 | 132 RMWRAFKAGI NA | NA |
| 80  | 116 RMWRAFTSRA NA | NA |
| 44  | 65 RMWRAFIQMG NA  | NA |
| 81  | 109 RMWRAFRQTG NA | NA |
| 38  | 55 RMWRAFTGHR NA  | NA |
| 21  | 26 IAPEFLQAGW NA  | NA |
| 26  | 35 IAPEFLTRIQ NA  | NA |
| 52  | 41 IAPEFLAYVV NA  | NA |
| 58  | 59 IAPEFLWKGW NA  | NA |
| 32  | 39 IAPEFLKMGW NA  | NA |
| 24  | 43 IAPEFLTVHV NA  | NA |
| 27  | 29 IAPEFLMDGS NA  | NA |
| 27  | 15 IAPEFLINIY NA  | NA |
| 2   | 5 IAPEFLSYNF NA   | NA |
| 40  | 47 HTVRGLIGMG NA  | NA |
| 75  | 110 HTVRGLLDNW NA | NA |
| 40  | 54 HTVRGLMGPG NA  | NA |
| 49  | 53 HTVRGLIQEG NA  | NA |
| 76  | 101 HTVRGLQGHK NA | NA |
| 69  | 71 PTWRGLWMPH NA  | NA |
| 62  | 80 PTWRGLWLAV NA  | NA |
| 90  | 126 PTWRGLIMHR NA | NA |
| 54  | 76 PTWRGLIQKG NA  | NA |
| 46  | 43 PTWRGLFLAI NA  | NA |
| 68  | 90 PTWRGLWRNR NA  | NA |
| 94  | 103 PTWRGLRRNQ NA | NA |
| 70  | 81 PTWRGLLLLIV NA | NA |
| 59  | 71 PTWRGLQQHS NA  | NA |

|     |     |                |    |
|-----|-----|----------------|----|
| 91  | 84  | PTWRGLAGHL NA  | NA |
| 64  | 77  | PTWRGLLAGK NA  | NA |
| 95  | 120 | CNPLGIRLQW NA  | NA |
| 138 | 152 | NNPLGIRYHG NA  | NA |
| 70  | 73  | HNPLGIRGKG NA  | NA |
| 40  | 46  | ANPLGIRLMR NA  | NA |
| 105 | 115 | SNPLGIRNWR NA  | NA |
| 60  | 72  | GNPLGIRNPL NA  | NA |
| 50  | 50  | KNPLGIRSLY NA  | NA |
| 36  | 44  | LNPLGIRDAY NA  | NA |
| 57  | 66  | PNPLGIRNKF NA  | NA |
| 70  | 76  | GNPLGIRKQI NA  | NA |
| 28  | 27  | NGPYNLSYLK NA  | NA |
| 25  | 16  | NGPYNLLRGI NA  | NA |
| 31  | 43  | TLIRYLWGTK NA  | NA |
| 43  | 60  | TYPRDILAIK NA  | NA |
| 35  | 40  | EKPRDILASS NA  | NA |
| 51  | 59  | NMPRDILAEK NA  | NA |
| 54  | 55  | FKPRDILAGF NA  | NA |
| 33  | 51  | IYPRDILAPF NA  | NA |
| 26  | 34  | SFPRDILANI NA  | NA |
| 35  | 36  | EDPRDILAGI NA  | NA |
| 55  | 51  | DRPRDILAIQ NA  | NA |
| 80  | 87  | RFPRDILAHQ NA  | NA |
| 8   | 20  | IMHRALWKSS NA  | NA |
| 67  | 79  | IMHRALILGT NA  | NA |
| 57  | 50  | IMHRALWDVK NA  | NA |
| 52  | 63  | WQVRYLSNPQ NA  | NA |
| 38  | 39  | HMPLGLLKIQ NA  | NA |
| 71  | 86  | HMPLGLSQAHA NA | NA |
| 99  | 102 | HMPLGLRNNA NA  | NA |
| 18  | 28  | WTPRGNLAQT NA  | NA |
| 34  | 52  | VVPNNLANQW NA  | NA |
| 100 | 101 | VVPNNLALSW NA  | NA |
| 46  | 56  | VVPNNLMYEY NA  | NA |
| 31  | 29  | VVPNNLTQQH NA  | NA |
| 38  | 69  | WHWRGLWSET NA  | NA |
| 19  | 30  | GPGRGLWSEI NA  | NA |
| 68  | 74  | KASRGLWSEQ NA  | NA |
| 101 | 97  | WKWRGLWSES NA  | NA |
| 52  | 59  | KTSRGLWSEV NA  | NA |

|     |     |               |    |
|-----|-----|---------------|----|
| 37  | 55  | VWGRGLWSEF NA | NA |
| 32  | 41  | IFPANHLQEQ NA | NA |
| 48  | 39  | IFPANHLRAI NA | NA |
| 28  | 43  | ESIRHLSLNR NA | NA |
| 53  | 62  | VPPRVLSGML NA | NA |
| 58  | 70  | SLNRALIGNA NA | NA |
| 33  | 42  | SLNRALIQEY NA | NA |
| 119 | 169 | DPWRALSAHV NA | NA |
| 49  | 48  | DPWRALFSNT NA | NA |
| 62  | 62  | DPWRALMNLS NA | NA |
| 78  | 85  | DPWRALARNL NA | NA |
| 59  | 69  | DPWRALLGTF NA | NA |
| 87  | 131 | DPWRALRQEY NA | NA |
| 18  | 22  | DPWRALMAGG NA | NA |
| 45  | 59  | DPWRALMYSG NA | NA |
| 37  | 70  | DPWRALIATL NA | NA |
| 40  | 37  | QSPRMLTMPG NA | NA |
| 50  | 58  | QSPRMLSKRF NA | NA |
| 50  | 60  | QSPRMLFYRA NA | NA |
| 12  | 13  | QSPRMLASSF NA | NA |
| 41  | 47  | QSPRMLRALI NA | NA |
| 24  | 38  | QSPRMLADMF NA | NA |
| 71  | 87  | LVGRALWSRS NA | NA |
| 30  | 27  | DFVRHLINWF NA | NA |
| 24  | 27  | PAVRHLINGK NA | NA |
| 45  | 43  | DIVRHLINHL NA | NA |
| 33  | 48  | IYVRHLINNG NA | NA |
| 46  | 59  | IHVRHLINIH NA | NA |
| 57  | 75  | CNVRHLINAG NA | NA |
| 59  | 67  | VYVRHLINNQ NA | NA |
| 35  | 43  | ATVRHLINEG NA | NA |
| 75  | 78  | EKVRHLINGA NA | NA |
| 18  | 17  | NHVRHLINIS NA | NA |
| 47  | 102 | GRPRSLLRIF NA | NA |
| 49  | 77  | GRPRSLSMVG NA | NA |
| 33  | 46  | GRPRSLLYQQ NA | NA |
| 45  | 70  | GRPRSLDRH NA  | NA |
| 32  | 37  | GRPRSLSNKV NA | NA |
| 180 | 189 | LIPYHLADQW NA | NA |
| 106 | 108 | DIPYHLANRQ NA | NA |
| 94  | 121 | MIPYHLAGVT NA | NA |

|     |     |               |    |
|-----|-----|---------------|----|
| 34  | 44  | VIPYHLANTL NA | NA |
| 144 | 156 | EIPYHLAKWH NA | NA |
| 233 | 256 | RIPYHLAQWL NA | NA |
| 22  | 32  | SIPYHLAKTR NA | NA |
| 95  | 104 | GIPYHLARPG NA | NA |
| 20  | 47  | GIPYHLASKT NA | NA |
| 63  | 75  | CIPYHLAYHF NA | NA |
| 107 | 146 | IIPYHLAGTG NA | NA |
| 23  | 40  | ATPESLFNHG NA | NA |
| 79  | 78  | ATPESLWKTW NA | NA |
| 64  | 73  | ATPESLTYVL NA | NA |
| 23  | 18  | ATPESLISPI NA | NA |
| 28  | 21  | ATPESLQNGG NA | NA |
| 67  | 73  | RLANALWDSA NA | NA |
| 48  | 53  | QGPWHITNGT NA | NA |
| 103 | 107 | QGPWHITLTR NA | NA |
| 47  | 66  | QGPWHISYEA NA | NA |
| 54  | 65  | ARIEYLRRMG NA | NA |
| 45  | 52  | ARIEYLRNAK NA | NA |
| 31  | 38  | ARIEYLWRGG NA | NA |
| 52  | 68  | DRPNYLWDTV NA | NA |
| 45  | 58  | QIPHHLTLIK NA | NA |
| 65  | 79  | KMPHHLTLMA NA | NA |
| 31  | 48  | IFPHHLTLPA NA | NA |
| 36  | 44  | EAPHHLTLGV NA | NA |
| 79  | 101 | CNPHHLTLLQ NA | NA |
| 76  | 73  | KWPHHLTLTK NA | NA |
| 49  | 64  | MDPHHLTLNA NA | NA |
| 106 | 117 | LSPHHLTLKW NA | NA |
| 52  | 41  | DDPHHLTLNY NA | NA |
| 48  | 69  | VMPHHLTLSF NA | NA |
| 37  | 56  | QQPHHLTLSS NA | NA |
| 39  | 58  | VLWRALWLGK NA | NA |
| 98  | 93  | VLWRALRRTG NA | NA |
| 35  | 43  | VLWRALILTR NA | NA |
| 20  | 27  | VLWRALIGWL NA | NA |
| 55  | 77  | RLPVAILGLK NA | NA |
| 64  | 70  | GFAHGLLLKG NA | NA |
| 45  | 47  | EQAHGLLLPK NA | NA |
| 43  | 47  | CAAHGLLLGS NA | NA |
| 16  | 37  | ANAHGLLLIS NA | NA |

|     |                   |    |
|-----|-------------------|----|
| 70  | 53 QIAHGLLLGG NA  | NA |
| 72  | 91 YRAHGLLLQF NA  | NA |
| 140 | 150 CHAHGLLLVI NA | NA |
| 22  | 29 YFAHGLLLMA NA  | NA |
| 95  | 111 YPAHGLLLTW NA | NA |
| 46  | 67 KQAHGLLLVI NA  | NA |
| 10  | 18 PRVEALLQTA NA  | NA |
| 4   | 7 PRVEALFLWK NA   | NA |
| 24  | 28 PRVEALTDEW NA  | NA |
| 61  | 47 PRVEALWYQG NA  | NA |
| 25  | 17 PRVEALFDLF NA  | NA |
| 32  | 48 PRVEALWGGK NA  | NA |
| 12  | 20 PRVEALFNSK NA  | NA |
| 27  | 21 PRVEALIGIL NA  | NA |
| 27  | 40 PRVEALIDHQ NA  | NA |
| 92  | 107 MNPLGIRYVS NA | NA |
| 45  | 54 PSPLGIRYTL NA  | NA |
| 151 | 196 FKPLGIRYRT NA | NA |
| 110 | 139 MWPLGIRYMW NA | NA |
| 36  | 62 ISPLGIRYVI NA  | NA |
| 57  | 57 VSPLGIRYAL NA  | NA |
| 34  | 47 GSPLGIRYPI NA  | NA |
| 53  | 79 RDPLGIRYGF NA  | NA |
| 186 | 258 KIPLGIRYHF NA | NA |
| 39  | 33 GHPLGIRYEI NA  | NA |
| 54  | 61 KKWRGLRGNF NA  | NA |
| 30  | 36 KKWRGLQYGT NA  | NA |
| 57  | 60 KKWRGLRKGQ NA  | NA |
| 41  | 55 KKWRGLRYGK NA  | NA |
| 31  | 52 KKWRGLRMPG NA  | NA |
| 51  | 75 KKWRGLIANG NA  | NA |
| 10  | 11 KKWRGLFGLQ NA  | NA |
| 30  | 43 WMESLRRMI NA   | NA |
| 30  | 37 WMESLLMSG NA   | NA |
| 12  | 10 WMESLWLLG NA   | NA |
| 42  | 36 WMESLAGSW NA   | NA |
| 107 | 116 WMESLRGSQ NA  | NA |
| 27  | 33 KTRNLFVR NA    | NA |
| 56  | 90 TTYMSLWRVA NA  | NA |
| 34  | 55 TTYMSLMDTL NA  | NA |
| 71  | 66 TTYMSLSAKT NA  | NA |

|     |     |               |    |
|-----|-----|---------------|----|
| 94  | 144 | HRWSALSQGR NA | NA |
| 131 | 202 | HRWSALRDQH NA | NA |
| 31  | 39  | ARPEFLTQGG NA | NA |
| 39  | 69  | ARPEFLTGRL NA | NA |
| 64  | 55  | ARPEFLWAVA NA | NA |
| 19  | 28  | ARPEFLWYKL NA | NA |
| 75  | 80  | ARPEFLWSGH NA | NA |
| 24  | 24  | ARPEFLQVRA NA | NA |
| 32  | 40  | ARPEFLLNHF NA | NA |
| 64  | 61  | HVYGALRYVF NA | NA |
| 65  | 80  | MVYGALRGLY NA | NA |
| 54  | 86  | CVYGALRDGF NA | NA |
| 67  | 71  | LVYGALRSTT NA | NA |
| 85  | 141 | MVYGALRGPR NA | NA |
| 16  | 17  | PVYGALRDNY NA | NA |
| 57  | 54  | YVYGALRAVF NA | NA |
| 35  | 52  | WVYGALRDIK NA | NA |
| 76  | 90  | IVYGALRYMW NA | NA |
| 161 | 191 | LVYGALRRSG NA | NA |
| 47  | 66  | PKWHGLWGMW NA | NA |
| 77  | 82  | PKWHGLKDSK NA | NA |
| 50  | 58  | PKWHGLTDPG NA | NA |
| 67  | 89  | PKWHGLIYVY NA | NA |
| 38  | 48  | PKWHGLKNMG NA | NA |
| 81  | 100 | PKWHGLFDPT NA | NA |
| 100 | 126 | PKWHGLRLTG NA | NA |
| 63  | 99  | PKWHGLVLRG NA | NA |
| 51  | 46  | PKWHGLASVQ NA | NA |
| 52  | 71  | PKWHGLINER NA | NA |
| 27  | 24  | VIYGNLWGEL NA | NA |
| 41  | 41  | VIYGNLFKMV NA | NA |
| 13  | 31  | VIYGNLWYIF NA | NA |
| 30  | 33  | VIYGNLFSMF NA | NA |
| 30  | 41  | VIYGNLHRIY NA | NA |
| 3   | 6   | VIYGNLFLLV NA | NA |
| 15  | 44  | VIYGNLADRH NA | NA |
| 22  | 24  | VIYGNLAKAQ NA | NA |
| 30  | 43  | VIYGNLWMTF NA | NA |
| 31  | 37  | YPFGSLGLL NA  | NA |
| 35  | 39  | YPFGSLLYKK NA | NA |
| 35  | 43  | VVLMGLLVGW NA | NA |

|     |     |                |    |
|-----|-----|----------------|----|
| 89  | 107 | VVLMGLTGHF NA  | NA |
| 64  | 73  | VVLMGLMVAQ NA  | NA |
| 65  | 97  | VVLMGLSVSQ NA  | NA |
| 67  | 74  | VVLMGLAMHS NA  | NA |
| 48  | 52  | VVLMGLMMGY NA  | NA |
| 58  | 93  | VVLMGLADWA NA  | NA |
| 61  | 57  | VVLMGLTNSW NA  | NA |
| 96  | 87  | HQWAALLQNF NA  | NA |
| 85  | 121 | HQWAALSVQT NA  | NA |
| 66  | 94  | HQWAALSDPS NA  | NA |
| 103 | 108 | HQWAALFKWH NA  | NA |
| 73  | 98  | ELVRSLIDEW NA  | NA |
| 41  | 48  | ELVRSLIKLI NA  | NA |
| 87  | 117 | FVVRALSARF NA  | NA |
| 39  | 62  | FVVRALLGTL NA  | NA |
| 63  | 72  | FVVRALSNNK NA  | NA |
| 36  | 40  | VDIRMLALGF NA  | NA |
| 41  | 47  | VDIRMLAQQA NA  | NA |
| 50  | 58  | VDIRMLMMTW NA  | NA |
| 145 | 158 | VDIRMLIVKQ NA  | NA |
| 88  | 93  | VDIRMLWGKI NA  | NA |
| 62  | 55  | VDIRMLMNAF NA  | NA |
| 32  | 32  | TNPLGLSGGG NA  | NA |
| 19  | 29  | TSPLGLSGSA NA  | NA |
| 52  | 84  | GMPLGLSGSH NA  | NA |
| 63  | 61  | EIPLGLSGLL NA  | NA |
| 51  | 72  | GFPLGLSGWY NA  | NA |
| 78  | 100 | YKPLGLSGHG NA  | NA |
| 64  | 63  | FHPLGLSGNH NA  | NA |
| 36  | 66  | EQPLGLSGIR NA  | NA |
| 36  | 41  | WHPLGLSGPF NA  | NA |
| 54  | 63  | SKPLGLSGMT NA  | NA |
| 27  | 32  | RAPRPLLAVI NA  | NA |
| 24  | 42  | EDPRPLLARI NA  | NA |
| 44  | 67  | GAPRPLLAEK NA  | NA |
| 29  | 37  | P DPRPLLAVQ NA | NA |
| 153 | 195 | MMPRPLLAGW NA  | NA |
| 34  | 35  | GTPRPLLAIK NA  | NA |
| 39  | 45  | DIPRPLLAH NA   | NA |
| 56  | 88  | HRPRPLLAVS NA  | NA |
| 36  | 30  | YPPRPLLARH NA  | NA |

|     |                   |    |
|-----|-------------------|----|
| 85  | 83 FIPRPLLAGY NA  | NA |
| 25  | 24 PQPRPLLAHV NA  | NA |
| 53  | 53 WPHGSLLMKF NA  | NA |
| 63  | 66 NRVEMLRDMG NA  | NA |
| 69  | 104 NRVEMLRAGI NA | NA |
| 49  | 68 NRVEMLSATR NA  | NA |
| 84  | 82 NRVEMLWRNV NA  | NA |
| 136 | 181 VLPEPLRKRR NA | NA |
| 19  | 36 VLPEPLLDTH NA  | NA |
| 36  | 43 VLPEPLLGTR NA  | NA |
| 28  | 24 VLPEPLLYTS NA  | NA |
| 104 | 124 VLPEPLWVHY NA | NA |
| 41  | 37 VLPEPLTQQY NA  | NA |
| 44  | 51 VLPEPLTVLT NA  | NA |
| 32  | 51 QAPMGLFQSV NA  | NA |
| 47  | 41 QAPMGLIGRG NA  | NA |
| 38  | 27 QAPMGLLKTW NA  | NA |
| 55  | 62 QAPMGLRGLY NA  | NA |
| 40  | 32 QAPMGLIKWI NA  | NA |
| 14  | 19 QAPMGLASSK NA  | NA |
| 24  | 39 QAPMGLSLTR NA  | NA |
| 26  | 43 QAPMGLKDET NA  | NA |
| 44  | 41 QAPMGLIQEK NA  | NA |
| 92  | 130 YDSRGLRDVR NA | NA |
| 40  | 31 YDSRGLAVRG NA  | NA |
| 51  | 65 YDSRGLFVIQ NA  | NA |
| 33  | 44 YDSRGLAQMA NA  | NA |
| 62  | 74 YDSRGLMKWW NA  | NA |
| 48  | 62 YVPTGLFKLG NA  | NA |
| 31  | 36 YVPTGLSGEG NA  | NA |
| 117 | 137 YVPTGLQYPH NA | NA |
| 80  | 76 YVPTGLIYRQ NA  | NA |
| 39  | 44 YVPTGLFSTI NA  | NA |
| 115 | 165 CNSWGLRDQW NA | NA |
| 122 | 142 ENSWGLRRPH NA | NA |
| 147 | 165 MNSWGLRVAA NA | NA |
| 59  | 84 KNSWGLRLHH NA  | NA |
| 72  | 79 PNSWGLRLQW NA  | NA |
| 120 | 133 PNSWGLRRMV NA | NA |
| 81  | 121 CNSWGLRDVR NA | NA |
| 90  | 102 QNSWGLRSly NA | NA |



|     |                   |    |
|-----|-------------------|----|
| 73  | 85 YNSWGLRGIH NA  | NA |
| 45  | 64 GNSWGLRGPV NA  | NA |
| 149 | 178 APYNHLWMVS NA | NA |
| 75  | 82 APYNHLSGIA NA  | NA |
| 68  | 105 APYNHLWYPG NA | NA |
| 94  | 101 APYNHLASGF NA | NA |
| 43  | 38 RQWYGIFQNG NA  | NA |
| 35  | 33 RQWYGIANSNG NA | NA |
| 85  | 107 RQWYGIHMVA NA | NA |
| 63  | 65 RQWYGIWSPW NA  | NA |
| 50  | 65 RQWYGIWLGG NA  | NA |
| 59  | 68 RQWYGIALML NA  | NA |
| 43  | 51 RQWYGIWGGF NA  | NA |
| 43  | 50 RQWYGITNGG NA  | NA |
| 40  | 38 AAWASIRGTA NA  | NA |
| 52  | 53 AAWASISGPT NA  | NA |
| 36  | 51 AAWASITGER NA  | NA |
| 72  | 87 AAWASIAKWR NA  | NA |
| 35  | 44 AAWASIMRQW NA  | NA |
| 45  | 61 AAWASISRTG NA  | NA |
| 44  | 55 MVVRGLSQQQ NA  | NA |
| 94  | 120 WVVRGLSKRL NA | NA |
| 47  | 41 AVVRGLSSIT NA  | NA |
| 44  | 49 WVVRGLSDNS NA  | NA |
| 31  | 34 GVVRGLSGKT NA  | NA |
| 72  | 105 HVVRGLSDRG NA | NA |
| 33  | 47 GVVRGLSQQK NA  | NA |
| 73  | 73 WVVRGLSQQK NA  | NA |
| 29  | 24 SVVRGLSKEI NA  | NA |
| 38  | 35 PVVRGLSKMG NA  | NA |
| 52  | 68 HVVRGLSMHG NA  | NA |
| 61  | 79 KAVNHLWAHF NA  | NA |
| 37  | 58 KAVNHLWQTV NA  | NA |
| 80  | 114 TTPYHIAGNH NA | NA |
| 45  | 40 TTPYHITNNT NA  | NA |
| 35  | 64 TTPYHILMRS NA  | NA |
| 71  | 65 KWPNAFLKAY NA  | NA |
| 44  | 45 LWPNAFLVTA NA  | NA |
| 44  | 53 CWPNAFLSNG NA  | NA |
| 32  | 32 SWPNAFLYNG NA  | NA |
| 2   | 4 LWPNAFLQVK NA   | NA |

|     |                   |    |
|-----|-------------------|----|
| 51  | 58 QWPNAFLGSS NA  | NA |
| 55  | 85 NWPNAFLKNH NA  | NA |
| 208 | 280 MWPNAFLYHG NA | NA |
| 16  | 22 TWPNAFLYGT NA  | NA |
| 5   | 7 EVLRMLSNMG NA   | NA |
| 23  | 20 GVLRMLSMKY NA  | NA |
| 38  | 69 RVLRMLSKRG NA  | NA |
| 78  | 88 WVLRMLSSEL NA  | NA |
| 58  | 54 GVLRMLSGMG NA  | NA |
| 68  | 77 MVLRMLSNWT NA  | NA |
| 104 | 109 WVLRMLSAKK NA | NA |
| 91  | 83 HSAHGILSRK NA  | NA |
| 71  | 81 CNAHGILSMF NA  | NA |
| 51  | 59 TIAHGILSAT NA  | NA |
| 38  | 48 DIAHGILSEA NA  | NA |
| 65  | 73 QKAHGILSRH NA  | NA |
| 27  | 40 NQAHGILSMI NA  | NA |
| 59  | 74 LPAHGILSTW NA  | NA |
| 29  | 36 VNAHGILSVY NA  | NA |
| 45  | 36 ISAHGILSKL NA  | NA |
| 40  | 52 STIRMLLDQT NA  | NA |
| 54  | 65 STIRMLWQQA NA  | NA |
| 58  | 78 STIRMLSMPL NA  | NA |
| 15  | 16 STIRMLMLAR NA  | NA |
| 50  | 79 STIRMLIGRI NA  | NA |
| 79  | 102 STIRMLTSHL NA | NA |
| 61  | 78 DLPAGLRYSR NA  | NA |
| 32  | 28 DLPAGLRNEQ NA  | NA |
| 31  | 43 DLPAGLAVMT NA  | NA |
| 55  | 61 DLPAGLQARK NA  | NA |
| 91  | 111 FNPIHLWGQY NA | NA |
| 76  | 115 FNPIHLMVQL NA | NA |
| 45  | 47 FNPIHLRAKA NA  | NA |
| 45  | 79 FNPIHLAMAG NA  | NA |
| 45  | 65 FNPIHLWDNA NA  | NA |
| 62  | 60 MSPYGLLYPY NA  | NA |
| 14  | 20 VSPYGLLNPQ NA  | NA |
| 40  | 70 GSPYGLLLWV NA  | NA |
| 23  | 31 LSPYGLLSNG NA  | NA |
| 66  | 59 ESPYGLLAHH NA  | NA |
| 24  | 36 KSPYGLLGQI NA  | NA |

|     |     |               |    |
|-----|-----|---------------|----|
| 19  | 42  | TSPYGLLRAV NA | NA |
| 12  | 2   | CSPYGLLMHS NA | NA |
| 16  | 17  | FSPYGLLALH NA | NA |
| 11  | 14  | GTVEPLRILQ NA | NA |
| 1   | 0   | NYFEALRILQ NA | NA |
| 21  | 32  | RMSWGLRILQ NA | NA |
| 121 | 147 | PKMSHLWKKV NA | NA |
| 74  | 76  | KAAHGLLTWT NA | NA |
| 60  | 57  | CAAHGLLTMQ NA | NA |
| 64  | 67  | HIAHGLLTPR NA | NA |
| 57  | 60  | VSAHGLLTTW NA | NA |
| 95  | 133 | IYAHGLLTLK NA | NA |
| 67  | 69  | PHAHGLLTEG NA | NA |
| 142 | 188 | FYAHGLLTHG NA | NA |
| 38  | 52  | YTAHGLLTAK NA | NA |
| 26  | 32  | ATAHGLLTRF NA | NA |
| 68  | 62  | VQAHGLLTGW NA | NA |
| 74  | 76  | HTAHGLLTLG NA | NA |
| 9   | 21  | PRVHHLMSEI NA | NA |
| 72  | 74  | PRVHHLAYHY NA | NA |
| 46  | 85  | PRVHHLRVHG NA | NA |
| 21  | 28  | PRVHHLASSY NA | NA |
| 63  | 74  | PRVHHLAMWH NA | NA |
| 42  | 39  | PRVHHLIVMR NA | NA |
| 94  | 89  | PRVHHLMKLW NA | NA |
| 74  | 79  | YIIRSLWATP NA | NA |
| 65  | 73  | DFYLFLWATP NA | NA |
| 39  | 42  | QIWGNLRVLK NA | NA |
| 52  | 60  | MRVAGLRVLK NA | NA |
| 111 | 182 | WHYHHLMAGH NA | NA |
| 84  | 87  | RHYHHLMQNI NA | NA |
| 74  | 94  | PHYHHLMKPK NA | NA |
| 117 | 141 | SHYHHLMATY NA | NA |
| 222 | 275 | PHYHHLMGPL NA | NA |
| 258 | 265 | KHYHHLMVRS NA | NA |
| 250 | 347 | SHYHHLMYIA NA | NA |
| 161 | 205 | WHYHHLMVIH NA | NA |
| 185 | 247 | NHYHHLMYLL NA | NA |
| 160 | 185 | QHYHHLMAIF NA | NA |
| 12  | 26  | SQVRFLSDAY NA | NA |
| 12  | 9   | SFPNPLWMLH NA | NA |

|     |     |               |    |
|-----|-----|---------------|----|
| 12  | 24  | SFPNPLIYSY NA | NA |
| 48  | 69  | SFPNPLWAHQ NA | NA |
| 47  | 62  | EMVRAIIAGH NA | NA |
| 39  | 53  | NIVRAIIASY NA | NA |
| 100 | 115 | FIVRAIIAHQ NA | NA |
| 75  | 57  | AHVRAIIAVH NA | NA |
| 51  | 42  | NMVRAIIAGT NA | NA |
| 47  | 60  | MHVRAIIAVK NA | NA |
| 59  | 78  | YNVRAIIAMY NA | NA |
| 57  | 58  | AHVRAIIAKQ NA | NA |
| 50  | 45  | LQPRGLRGHI NA | NA |
| 79  | 78  | MQPRGLRAGS NA | NA |
| 57  | 73  | HQPRGLRYGF NA | NA |
| 63  | 96  | CQPRGLRRIS NA | NA |
| 49  | 55  | SQPRGLRDIH NA | NA |
| 99  | 130 | SQPRGLRMPS NA | NA |
| 108 | 130 | WQPRGLRYSR NA | NA |
| 61  | 62  | LQPRGLRGLL NA | NA |
| 52  | 66  | NQPRGLRDVK NA | NA |
| 32  | 34  | GQPRGLRDIV NA | NA |
| 74  | 110 | AQPRGLRKWS NA | NA |
| 42  | 34  | SLVRFLSKVT NA | NA |
| 30  | 37  | VRPRPFLSVA NA | NA |
| 36  | 42  | RTPIGITYLT NA | NA |
| 35  | 32  | RTPIGITQEH NA | NA |
| 27  | 44  | RTPIGIIYQF NA | NA |
| 33  | 40  | RTPIGIFYPL NA | NA |
| 46  | 50  | RTPIGILRRI NA | NA |
| 27  | 41  | RTPIGISAHV NA | NA |
| 199 | 247 | TFWGALHMHG NA | NA |
| 93  | 114 | TFWGALHKVA NA | NA |
| 157 | 184 | TFWGALWYSH NA | NA |
| 24  | 34  | TFWGALTDLQ NA | NA |
| 77  | 91  | TFWGALLVTQ NA | NA |
| 122 | 164 | TFWGALHNSH NA | NA |
| 58  | 59  | TFWGALSYPF NA | NA |
| 53  | 62  | TFWGALLRPG NA | NA |
| 26  | 40  | TFWGALKGMH NA | NA |
| 48  | 47  | YYPRALLYTA NA | NA |
| 102 | 89  | YYPRALSKWV NA | NA |
| 41  | 63  | ARVRHLIMRR NA | NA |

|     |     |            |    |    |
|-----|-----|------------|----|----|
| 54  | 103 | ARVRHLSVQR | NA | NA |
| 43  | 56  | YDVYNLSKWA | NA | NA |
| 67  | 95  | MHFIDLRIGL | NA | NA |
| 142 | 222 | GDSAALRVRG | NA | NA |
| 107 | 119 | WWHEALRVRG | NA | NA |
| 53  | 63  | SDFEALRVRG | NA | NA |
| 358 | 460 | KDMRALRVRG | NA | NA |
| 49  | 51  | TWPAGLTGTH | NA | NA |
| 35  | 41  | DWPAGLTLRA | NA | NA |
| 75  | 92  | SWPAGLTSLG | NA | NA |
| 59  | 72  | RWPAGLTRQF | NA | NA |
| 39  | 48  | KWPAGLTGGV | NA | NA |
| 79  | 56  | QWPAGLTAKF | NA | NA |
| 30  | 24  | LWPAGLTVPY | NA | NA |
| 62  | 82  | PWPAGLTNWG | NA | NA |
| 52  | 55  | GGYAGLRGVR | NA | NA |
| 100 | 128 | HGYAGLRVNQ | NA | NA |
| 60  | 73  | FGYAGLRDER | NA | NA |
| 53  | 82  | MGYAGLRKGQ | NA | NA |
| 110 | 125 | MGYAGLRQSR | NA | NA |
| 135 | 151 | HGYAGLRVRS | NA | NA |
| 47  | 57  | NGYAGLRAWS | NA | NA |
| 67  | 127 | KGYAGLRYMW | NA | NA |
| 112 | 169 | FGYAGLRRVA | NA | NA |
| 33  | 49  | GIVMGIRIWS | NA | NA |
| 38  | 65  | HAVMGIRITF | NA | NA |
| 65  | 67  | RIVMGIRIGK | NA | NA |
| 24  | 40  | RFVVGIRIQQ | NA | NA |
| 32  | 47  | EPVVGIRIPH | NA | NA |
| 60  | 84  | CFVVGIRIPG | NA | NA |
| 54  | 80  | GWVVGIRINR | NA | NA |
| 25  | 31  | QNVVGIRIEI | NA | NA |
| 126 | 137 | YHVMGIRIGT | NA | NA |
| 42  | 47  | SFVVGIRIEG | NA | NA |
| 35  | 57  | VIPRPLSYMG | NA | NA |
| 42  | 61  | WNVRSLIVWA | NA | NA |
| 23  | 18  | GNVRSLIKIG | NA | NA |
| 56  | 93  | CNVRSLIGTH | NA | NA |
| 40  | 45  | GNVRSLIYIL | NA | NA |
| 16  | 27  | RNVRSLIVSI | NA | NA |
| 23  | 22  | GNVRSLINMG | NA | NA |

|     |                   |    |
|-----|-------------------|----|
| 45  | 57 RNVRSLIAIR NA  | NA |
| 31  | 48 TNVRSLIGTT NA  | NA |
| 18  | 24 LNVRSLISQF NA  | NA |
| 12  | 23 KNVRSLIAEG NA  | NA |
| 44  | 74 RVPYGLWLAV NA  | NA |
| 31  | 27 RVPYGLQRIS NA  | NA |
| 55  | 55 RVPYGLFGGK NA  | NA |
| 46  | 66 RVPYGLMVLN NA  | NA |
| 58  | 95 RVPYGLLRAH NA  | NA |
| 37  | 27 RVPYGLQQGF NA  | NA |
| 42  | 57 RVPYGLQRWI NA  | NA |
| 33  | 65 RVPYGLINHG NA  | NA |
| 86  | 93 HVWMNLWRHG NA  | NA |
| 45  | 53 HVWMNLTMIS NA  | NA |
| 93  | 100 HVWMNLWRIQ NA | NA |
| 74  | 76 HVWMNLRGTK NA  | NA |
| 58  | 65 HVWMNLLQNA NA  | NA |
| 65  | 84 HVWMNLTKGY NA  | NA |
| 81  | 77 YPSHGLRSNS NA  | NA |
| 43  | 73 TPSHGLRSKH NA  | NA |
| 31  | 29 GSSHGLRSEY NA  | NA |
| 117 | 124 EWSHGLRSNV NA | NA |
| 150 | 235 DYSHGLRSMV NA | NA |
| 97  | 109 GMSHGLRSNQ NA | NA |
| 51  | 54 DTSHGLRSPF NA  | NA |
| 49  | 82 DNSHGLRSTR NA  | NA |
| 44  | 55 VSSHGLRSEK NA  | NA |
| 154 | 198 INSHGLRSWV NA | NA |
| 35  | 54 LRSHGLRSGI NA  | NA |
| 17  | 25 ESVHHLISPT NA  | NA |
| 41  | 54 RSVHHLIDQL NA  | NA |
| 33  | 62 LSVHHLIRAY NA  | NA |
| 65  | 85 LSVHHLIDGK NA  | NA |
| 31  | 40 YSVHHLIQRG NA  | NA |
| 32  | 44 PSVHHLIVIR NA  | NA |
| 86  | 85 ESVHHLIYHV NA  | NA |
| 57  | 55 KSVHHLIDIY NA  | NA |
| 72  | 78 GSVHHLIAVW NA  | NA |
| 15  | 15 SSVHHLIVPG NA  | NA |
| 32  | 45 NSVHHLINNA NA  | NA |
| 70  | 70 SKMAHLMMVG NA  | NA |

|     |                    |    |
|-----|--------------------|----|
| 22  | 35 SKMAHLTSSG NA   | NA |
| 60  | 56 SKMAHLMGMF NA   | NA |
| 47  | 44 SKMAHLWSNI NA   | NA |
| 58  | 64 SKMAHLWKGT NA   | NA |
| 25  | 29 ITPHGFFQHG NA   | NA |
| 56  | 55 SNPHGFFQNV NA   | NA |
| 77  | 75 CIPHGFFQSR NA   | NA |
| 79  | 116 VQPHGFFQRR NA  | NA |
| 82  | 110 CKPHGFFQVR NA  | NA |
| 40  | 42 ARPHGFFQST NA   | NA |
| 15  | 28 GSPHGFFQKQ NA   | NA |
| 15  | 24 VTPHGFFQTG NA   | NA |
| 34  | 42 KFPHGFFQGK NA   | NA |
| 37  | 61 KIPHGFFQVT NA   | NA |
| 28  | 34 RQWRALLGLS NA   | NA |
| 15  | 29 RQWRALFDLK NA   | NA |
| 50  | 68 RQWRALWVGF NA   | NA |
| 69  | 90 AHYASLILAQ NA   | NA |
| 33  | 55 RFPRPIIDPH NA   | NA |
| 63  | 73 RFPRPILKGW NA   | NA |
| 37  | 34 RFPRPIAGVT NA   | NA |
| 54  | 71 RFPRPIAAWS NA   | NA |
| 44  | 56 RFPRPIRDSA NA   | NA |
| 27  | 30 SSVWHISRAI NA   | NA |
| 10  | 15 SSVWHIIDLQ NA   | NA |
| 5   | 10 SSVWHIAKTR NA   | NA |
| 45  | 65 SSVWHISLTY NA   | NA |
| 113 | 151 WWMGHLLHAT NA  | NA |
| 94  | 142 KRMGHLLHKKH NA | NA |
| 210 | 266 MKMGHLLHPR NA  | NA |
| 121 | 133 QMMGHLLHGF NA  | NA |
| 137 | 175 FYMGHLLHGG NA  | NA |
| 129 | 144 RMMGHLLHLV NA  | NA |
| 128 | 133 YIMGHLLHMA NA  | NA |
| 52  | 61 EQMGHLLHVT NA   | NA |
| 64  | 76 AQMGHLLHGV NA   | NA |
| 98  | 126 VPMGHLLHQV NA  | NA |
| 125 | 139 SKMGHLLHRS NA  | NA |
| 25  | 23 RQLAAIWALH NA   | NA |
| 55  | 70 VIYHLRHTK NA    | NA |
| 50  | 71 IQMGHLLGMS NA   | NA |

|     |                   |    |
|-----|-------------------|----|
| 66  | 90 IKMIHLLGMS NA  | NA |
| 61  | 81 SGSRALWYQQ NA  | NA |
| 25  | 19 TVVAYIWRWW NA  | NA |
| 33  | 27 TVVAYIWYET NA  | NA |
| 131 | 151 MKWAAYTAGG NA | NA |
| 71  | 125 MKWAAYRKIS NA | NA |
| 149 | 191 MKWAAYSATS NA | NA |
| 151 | 206 MKWAAYRDIY NA | NA |
| 90  | 148 MKWAAYSMGF NA | NA |
| 148 | 199 MKWAAYAABV NA | NA |
| 134 | 140 MKWAAYWAET NA | NA |
| 122 | 160 MKWAAYARVF NA | NA |
| 197 | 263 MKWAAYAKWQ NA | NA |
| 19  | 28 QEPRNISGVT NA  | NA |
| 50  | 68 GLPMHLIGMA NA  | NA |
| 47  | 46 GLPMHLLDIK NA  | NA |
| 73  | 80 GLPMHLWSGW NA  | NA |
| 19  | 24 LAWAHISGSG NA  | NA |
| 100 | 116 LAWAHIAGHK NA | NA |
| 23  | 25 LAWAHIFGTS NA  | NA |
| 27  | 16 LAWAHIRQIS NA  | NA |
| 31  | 41 LAWAHIRNWF NA  | NA |
| 79  | 104 PSWRALMMKQ NA | NA |
| 66  | 62 PSWRALTLPG NA  | NA |
| 64  | 73 PSWRALAGHG NA  | NA |
| 48  | 70 PSWRALTSVR NA  | NA |
| 64  | 100 PSWRALAAWG NA | NA |
| 118 | 183 PSWRALRGSL NA | NA |
| 32  | 47 PSWRALSGNG NA  | NA |
| 311 | 359 PSWRALRMRL NA | NA |
| 111 | 152 MSWSALWGGQ NA | NA |
| 133 | 166 MSWSALSVLA NA | NA |
| 33  | 45 DAVYGLLSEL NA  | NA |
| 40  | 58 DAVYGLAMSK NA  | NA |
| 29  | 24 DAVYGLSDKK NA  | NA |
| 62  | 39 DAVYGLMYNG NA  | NA |
| 47  | 52 TILRNIRDVF NA  | NA |
| 70  | 75 TILRNIWLIH NA  | NA |
| 19  | 31 TILRNIRDAA NA  | NA |
| 47  | 49 TILRNIRDHA NA  | NA |
| 68  | 69 TILRNIWQKF NA  | NA |



|     |     |               |    |
|-----|-----|---------------|----|
| 49  | 42  | RMIRNLTMGS NA | NA |
| 120 | 122 | LMWAPLLRHG NA | NA |
| 45  | 68  | TDWAPLLRSI NA | NA |
| 53  | 58  | HDWAPLLRNH NA | NA |
| 54  | 72  | LAWAPLLRGQ NA | NA |
| 90  | 116 | INWAPLLRRT NA | NA |
| 74  | 93  | LNWAPLLRQL NA | NA |
| 38  | 40  | ERWAPLLRGG NA | NA |
| 55  | 74  | YNWAPLLRSR NA | NA |
| 134 | 175 | WKWAPLLRGV NA | NA |
| 141 | 168 | HRWAPLLRVQ NA | NA |
| 51  | 46  | GDWAPLLRLL NA | NA |
| 19  | 20  | QRMASLMGGG NA | NA |
| 49  | 67  | QRMASLRVMS NA | NA |
| 172 | 249 | ETMLALRKRQ NA | NA |
| 65  | 78  | ETMLALRATI NA | NA |
| 50  | 62  | ETMLALRQKF NA | NA |
| 117 | 152 | ETMLALRGMY NA | NA |
| 50  | 60  | DQSHMLRVKR NA | NA |
| 106 | 131 | MKFHSLRVKR NA | NA |
| 36  | 64  | VPWGNLAYSS NA | NA |
| 45  | 65  | VPWGNLFQTY NA | NA |
| 47  | 76  | VPWGNLSQIA NA | NA |
| 72  | 96  | EIWLPIWYKK NA | NA |
| 56  | 68  | EIWLPITGVW NA | NA |
| 22  | 35  | EIWLPITGEF NA | NA |
| 17  | 22  | TVSYALTSEI NA | NA |
| 34  | 52  | TVSYALWGTY NA | NA |
| 57  | 64  | TKYAYIWNWL NA | NA |
| 63  | 51  | FDISHLWLVK NA | NA |
| 43  | 63  | FDISHLWNLG NA | NA |
| 65  | 73  | EHYMSLIALI NA | NA |
| 58  | 79  | FRYMSLIAEK NA | NA |
| 93  | 129 | FPYMSLIARH NA | NA |
| 47  | 49  | VAYMSLIAGY NA | NA |
| 43  | 58  | NIYMSLIAES NA | NA |
| 75  | 69  | WHYMSLIAVG NA | NA |
| 68  | 77  | WPYMSLIAHL NA | NA |
| 38  | 27  | FQYMSLIAEA NA | NA |
| 24  | 30  | YWYMSLIAWG NA | NA |
| 61  | 78  | HRYMSLIATT NA | NA |

|     |     |                |    |
|-----|-----|----------------|----|
| 173 | 192 | MGMWHLMLSH NA  | NA |
| 73  | 78  | MGMWHLRLNA NA  | NA |
| 102 | 122 | MGMWHLMVPR NA  | NA |
| 35  | 46  | MGMWHLMLQK NA  | NA |
| 53  | 57  | HSPMHLILHG NA  | NA |
| 41  | 59  | GSPMHLIDVG NA  | NA |
| 76  | 97  | YSPMHLIGGG NA  | NA |
| 35  | 68  | VSPMHLIGLL NA  | NA |
| 46  | 56  | VSPMHLISRRA NA | NA |
| 82  | 89  | LSPMHLIGWT NA  | NA |
| 81  | 104 | CSPMHLILGK NA  | NA |
| 34  | 39  | ESPMHLIGQQ NA  | NA |
| 108 | 89  | ASPMHLIDMS NA  | NA |
| 34  | 45  | ESPMHLIKNS NA  | NA |
| 63  | 92  | PSPMHLIQRL NA  | NA |
| 76  | 106 | GWWMNLLVKH NA  | NA |
| 77  | 79  | GWWMNLMGQW NA  | NA |
| 83  | 105 | GWWMNLMDGQ NA  | NA |
| 52  | 65  | GWWMNLFRTI NA  | NA |
| 70  | 93  | GWWMNLAMGS NA  | NA |
| 58  | 70  | KSPLGLIRMK NA  | NA |
| 22  | 25  | KSPLGLSKKH NA  | NA |
| 53  | 61  | KSPLGLIAAY NA  | NA |
| 27  | 32  | KSPLGLAKGF NA  | NA |
| 10  | 21  | KSPLGLSGVS NA  | NA |
| 96  | 147 | HTYAALTMPQ NA  | NA |
| 33  | 48  | RTWAALTMPW NA  | NA |
| 40  | 43  | DIWAALTMPQ NA  | NA |
| 82  | 111 | RQLAHIWRWV NA  | NA |
| 19  | 26  | KKYYGLRAPK NA  | NA |
| 79  | 124 | YHYYGLRAAG NA  | NA |
| 60  | 74  | QWYYGLRAKK NA  | NA |
| 71  | 75  | AIYYGLRAWL NA  | NA |
| 70  | 83  | YDYYGLRAMV NA  | NA |
| 48  | 62  | WSYYGLRAEF NA  | NA |
| 45  | 57  | ERYYYGLRAST NA | NA |
| 17  | 18  | NSYYGLRASFA NA | NA |
| 25  | 28  | SQYYGLRAGR NA  | NA |
| 222 | 281 | MHYYGLRARR NA  | NA |
| 73  | 93  | QWYYGLRAGV NA  | NA |
| 20  | 44  | YKPAGLAQLQ NA  | NA |

|     |     |               |    |
|-----|-----|---------------|----|
| 44  | 51  | SIHLALWALI NA | NA |
| 57  | 85  | SIHLALWNNL NA | NA |
| 37  | 51  | VLWAGLIVLL NA | NA |
| 48  | 62  | VLWAGLIYQS NA | NA |
| 74  | 90  | VLWAGLTDVS NA | NA |
| 56  | 54  | VLWAGLMGVS NA | NA |
| 165 | 203 | VLWAGLAYIH NA | NA |
| 47  | 44  | VLWAGLFALF NA | NA |
| 36  | 54  | VLWAGLMRSH NA | NA |
| 50  | 68  | VLWAGLFAEQ NA | NA |
| 25  | 53  | VMYGNLSMNK NA | NA |
| 23  | 25  | VMYGNLHQEG NA | NA |
| 39  | 35  | VMYGNLQVQG NA | NA |
| 41  | 47  | VMYGNLWGSA NA | NA |
| 37  | 45  | VMYGNLSQPW NA | NA |
| 21  | 32  | TSFRMLLMKT NA | NA |
| 82  | 100 | YLVRYLSVVQ NA | NA |
| 38  | 46  | VPPEAISRWT NA | NA |
| 54  | 41  | VPPEAIAVQR NA | NA |
| 37  | 57  | VPPEAIKYGF NA | NA |
| 31  | 23  | VPPEAIQDTW NA | NA |
| 16  | 19  | VPPEAIINPY NA | NA |
| 46  | 41  | VPPEAILMLQ NA | NA |
| 9   | 19  | VPPEAIMGPA NA | NA |
| 42  | 57  | SDMRHLSLWS NA | NA |
| 76  | 89  | TDMRHLSAKF NA | NA |
| 73  | 106 | KDMRHLSLLR NA | NA |
| 9   | 5   | DDMRHLSKSR NA | NA |
| 41  | 59  | ADMRHLSNVV NA | NA |
| 32  | 56  | IDMRHLSMVG NA | NA |
| 76  | 70  | IDMRHLSMVR NA | NA |
| 25  | 27  | SDMRHLSKLT NA | NA |
| 45  | 72  | QDMRHLSYPR NA | NA |
| 62  | 79  | WDMRHLSGIG NA | NA |
| 47  | 57  | NKVYAWIVTF NA | NA |
| 48  | 59  | YSATNLLGKQ NA | NA |
| 40  | 37  | LLYASLINPY NA | NA |
| 68  | 62  | LLYASLSNPL NA | NA |
| 57  | 72  | LLYASLIGHA NA | NA |
| 76  | 82  | LLYASLSMPK NA | NA |
| 4   | 9   | EMYGNMLLWL NA | NA |

|     |     |               |    |
|-----|-----|---------------|----|
| 12  | 7   | LLYMGLFYLQ NA | NA |
| 29  | 30  | LLYMGLMYMS NA | NA |
| 33  | 37  | LLYMGLQVAV NA | NA |
| 37  | 52  | LLYMGLWGSA NA | NA |
| 59  | 75  | LLYMGLQYPL NA | NA |
| 18  | 28  | LLYMGLQYQI NA | NA |
| 20  | 25  | LLYMGLMYEW NA | NA |
| 12  | 14  | LLYMGLMNVG NA | NA |
| 61  | 83  | NMPNYIRAKG NA | NA |
| 83  | 90  | PMPNYIRAKF NA | NA |
| 60  | 91  | KQPNYIRAKY NA | NA |
| 76  | 110 | NWPNYIRAGL NA | NA |
| 45  | 44  | WRPNYIRARS NA | NA |
| 45  | 39  | RSPNYIRALL NA | NA |
| 47  | 70  | IIPNYIRATF NA | NA |
| 16  | 20  | HPPNYIRAMH NA | NA |
| 52  | 67  | TDPNYIRAAL NA | NA |
| 87  | 103 | AMPNYIRAGK NA | NA |
| 51  | 87  | TNPIMLRMGV NA | NA |
| 28  | 38  | SQPTGLQASL NA | NA |
| 30  | 24  | SQPTGLQMEI NA | NA |
| 19  | 27  | SQPTGLRSEG NA | NA |
| 25  | 19  | SQPTGLLSTG NA | NA |
| 23  | 43  | SQPTGLIDQG NA | NA |
| 67  | 93  | SQPTGLFKWT NA | NA |
| 49  | 43  | SQPTGLMGQI NA | NA |
| 31  | 44  | HWPVGLASNA NA | NA |
| 34  | 50  | HWPVGLADPI NA | NA |
| 53  | 52  | HWPVGLLNNI NA | NA |
| 50  | 52  | SLPTSLLVEK NA | NA |
| 14  | 11  | SLPTSLLLRG NA | NA |
| 47  | 62  | EMSWGLLGGG NA | NA |
| 122 | 154 | EMSWGLRQWT NA | NA |
| 86  | 114 | EMSWGLRGGG NA | NA |
| 17  | 31  | EMSWGLLSPG NA | NA |
| 27  | 29  | EMSWGLRGSY NA | NA |
| 93  | 97  | LWYGHLLYAK NA | NA |
| 79  | 94  | LWYGHLFLGH NA | NA |
| 96  | 132 | LWYGHLWSGV NA | NA |
| 52  | 49  | LWYGHLAVKI NA | NA |
| 176 | 223 | LWYGHLRRAG NA | NA |

|     |                   |    |
|-----|-------------------|----|
| 43  | 40 RLYMNITRTK NA  | NA |
| 50  | 45 RLYMNISARS NA  | NA |
| 66  | 86 RLYMNIMGGV NA  | NA |
| 51  | 55 RLYMNITYGK NA  | NA |
| 86  | 104 QHWGGLTVHR NA | NA |
| 48  | 65 QHWGGLTDEG NA  | NA |
| 102 | 131 QHWGGLSLNV NA | NA |
| 58  | 77 QHWGGLALMG NA  | NA |
| 216 | 294 QHWGGLFYHV NA | NA |
| 63  | 82 QHWGGLRGPG NA  | NA |
| 36  | 50 PAWHNMISMIS NA | NA |
| 73  | 127 TAWHNMRSAS NA | NA |
| 77  | 109 VAWHNMRRRV NA | NA |
| 257 | 325 IAWHNMRAWH NA | NA |
| 66  | 81 HAWHNMRSKI NA  | NA |
| 113 | 149 TAWHNMRASL NA | NA |
| 46  | 45 AAWHNMKIG NA   | NA |
| 68  | 112 TAWHNMRAIF NA | NA |
| 49  | 49 DAWHNMRLIG NA  | NA |
| 58  | 92 KAWHNMRMGA NA  | NA |
| 95  | 143 NAWHNMVDVA NA | NA |
| 142 | 177 VNARMLSAEK NA | NA |
| 84  | 74 TKWLALTQWI NA  | NA |
| 135 | 210 TKWLALRDRT NA | NA |
| 61  | 51 GEVRGLRKGR NA  | NA |
| 67  | 99 WEVRGLRGVW NA  | NA |
| 40  | 58 LEVRGLRQGA NA  | NA |
| 86  | 103 FEVRGLRGHK NA | NA |
| 98  | 123 TEVRGLRLPI NA | NA |
| 93  | 101 CEVRGLRLII NA | NA |
| 164 | 197 CEVRGLRLNL NA | NA |
| 92  | 115 CEVRGLRKPV NA | NA |
| 32  | 44 NEVRGLRLEA NA  | NA |
| 53  | 73 SEVRGLRNGK NA  | NA |
| 30  | 33 RTPVGLLKGG NA  | NA |
| 31  | 34 RTPVGLAMSL NA  | NA |
| 48  | 53 RTPVGLARIV NA  | NA |
| 18  | 21 RTPVGLASPY NA  | NA |
| 66  | 91 VMVWNIWDHV NA  | NA |
| 23  | 43 VMVWNIWNNG NA  | NA |
| 34  | 34 VMVWNIWSAT NA  | NA |

|     |     |                |    |
|-----|-----|----------------|----|
| 43  | 58  | YNWRHLLYTL NA  | NA |
| 50  | 45  | YNWRHLAQKS NA  | NA |
| 26  | 25  | YNWRHLIAPG NA  | NA |
| 48  | 70  | YNWRHLIRQF NA  | NA |
| 108 | 148 | YNWRHLFGEK NA  | NA |
| 73  | 87  | NMWAHLAYIQ NA  | NA |
| 111 | 116 | NMWAHLSKAL NA  | NA |
| 104 | 115 | MTVRSRIDRL NA  | NA |
| 22  | 33  | VTVRSRIDLL NA  | NA |
| 48  | 62  | ETVRSRIGLG NA  | NA |
| 36  | 59  | TTVRSRIVWG NA  | NA |
| 69  | 60  | WTVRSRIAGL NA  | NA |
| 5   | 11  | HTVRSRLISWY NA | NA |
| 52  | 60  | YTVRSRIDIH NA  | NA |
| 39  | 58  | HTVRSRIDNR NA  | NA |
| 68  | 84  | ITVRSRIGGH NA  | NA |
| 28  | 39  | ETVRSRIKQI NA  | NA |
| 48  | 56  | KNWRHLIKVY NA  | NA |
| 53  | 79  | EYIRHLIKVT NA  | NA |
| 10  | 12  | TRMRHLIKVI NA  | NA |
| 51  | 70  | VSVRHLIKVH NA  | NA |
| 45  | 49  | VDARHLIKVT NA  | NA |
| 18  | 24  | ISWRHLIKVI NA  | NA |
| 38  | 67  | DYVRHLIKVL NA  | NA |
| 132 | 160 | RGPYHLWDKF NA  | NA |
| 54  | 60  | RGPYHLSAQG NA  | NA |
| 127 | 175 | RGPYHLFLGW NA  | NA |
| 169 | 190 | RGPYHLWAHH NA  | NA |
| 76  | 98  | GCPHMMRNIY NA  | NA |
| 211 | 252 | GCPHMMRRGI NA  | NA |
| 99  | 110 | MNWESLHNPB NA  | NA |
| 106 | 115 | MNWESLLGHV NA  | NA |
| 98  | 127 | MNWESLAGGW NA  | NA |
| 159 | 188 | MNWESLRKLG NA  | NA |
| 90  | 134 | MNWESLRVQT NA  | NA |
| 88  | 124 | MNWESLFYWG NA  | NA |
| 94  | 105 | MNWESLRLWI NA  | NA |
| 81  | 101 | MNWESLLQWQ NA  | NA |
| 94  | 117 | MNWESLWNIK NA  | NA |
| 12  | 14  | TFARSLILRG NA  | NA |
| 47  | 44  | TFARSLIVWT NA  | NA |

|    |     |            |    |    |
|----|-----|------------|----|----|
| 45 | 65  | TFARSLIAGF | NA | NA |
| 47 | 46  | TFARSLIRGV | NA | NA |
| 64 | 85  | VVYRGLFQGF | NA | NA |
| 59 | 75  | VVYRGLTDLL | NA | NA |
| 53 | 63  | VVYRGLFMAA | NA | NA |
| 22 | 38  | VVYRGLWKEL | NA | NA |
| 90 | 94  | VVYRGLRVQY | NA | NA |
| 73 | 113 | VVYRGLMMKI | NA | NA |
| 83 | 93  | VVYRGLISVH | NA | NA |
| 29 | 65  | VVYRGLMLLI | NA | NA |
| 45 | 54  | VVYRGLAGGF | NA | NA |
| 37 | 39  | FSARSLIVEY | NA | NA |
| 79 | 92  | SIVRMLLRKW | NA | NA |
| 55 | 51  | SIVRMLIDGR | NA | NA |
| 56 | 56  | SIVRMLAKWY | NA | NA |
| 72 | 70  | SIVRMLAMGL | NA | NA |
| 56 | 52  | SIVRMLLKAY | NA | NA |
| 56 | 80  | SIVRMLIASK | NA | NA |
| 18 | 21  | KGPEMLQQLK | NA | NA |
| 16 | 15  | KGPEMLSLKG | NA | NA |
| 29 | 16  | KGPEMLIGMR | NA | NA |
| 47 | 60  | KGPEMLIYVH | NA | NA |
| 14 | 32  | KGPEMLMVRS | NA | NA |
| 31 | 21  | KGPEMLQNLH | NA | NA |
| 39 | 33  | KGPEMLQQGS | NA | NA |
| 34 | 39  | KGPEMLINGR | NA | NA |
| 47 | 52  | KGPEMLHNEK | NA | NA |
| 56 | 85  | LSPVMLRGWQ | NA | NA |
| 45 | 54  | QQPVMLRGPW | NA | NA |
| 54 | 46  | VIPVMLRGPW | NA | NA |
| 42 | 56  | ENPVMLRGSK | NA | NA |
| 49 | 67  | GQPVMLRGPR | NA | NA |
| 73 | 112 | CWPVMLRGAQ | NA | NA |
| 65 | 86  | YWPVMLRGQQ | NA | NA |
| 78 | 91  | DFPVMLRGMK | NA | NA |
| 55 | 67  | GDPVMLRGTW | NA | NA |
| 55 | 78  | MTPVMLRGNI | NA | NA |
| 35 | 37  | PGPESLLSEH | NA | NA |
| 26 | 37  | PGPESLSRMT | NA | NA |
| 71 | 77  | PGPESLFALY | NA | NA |
| 14 | 23  | PGPESLSLAT | NA | NA |

|     |     |               |    |
|-----|-----|---------------|----|
| 31  | 34  | PGPESLSYLI NA | NA |
| 31  | 53  | PGPESLRGKT NA | NA |
| 94  | 83  | VRAHSLWAAF NA | NA |
| 22  | 20  | RAHYSLIALF NA | NA |
| 15  | 36  | CFPEALQRLP NA | NA |
| 195 | 260 | GSMLALRVQL NA | NA |
| 47  | 73  | VQAEALRVQL NA | NA |
| 95  | 105 | WHFGALLAHQ NA | NA |
| 46  | 56  | WHFGALRVTF NA | NA |
| 75  | 78  | WHFGALRGMG NA | NA |
| 37  | 45  | DSYRELRLSN NA | NA |
| 14  | 29  | ADYEELRLSN NA | NA |
| 80  | 68  | EVVHSFCKVW NA | NA |
| 31  | 39  | SVVHSFCVTT NA | NA |
| 35  | 40  | NVVHSFCNVG NA | NA |
| 36  | 48  | NVVHSFCLAV NA | NA |
| 17  | 22  | QVVHSFCNSF NA | NA |
| 49  | 53  | EVVHSFCGRA NA | NA |
| 21  | 21  | WVVHSFCYMT NA | NA |
| 88  | 97  | CVVHSFCYNH NA | NA |
| 66  | 64  | DVVHSFCNSW NA | NA |
| 38  | 43  | SVVHSFCGTR NA | NA |
| 33  | 45  | SVVHSFCAAG NA | NA |
| 303 | 358 | AWPHSLRLFE NA | NA |
| 24  | 29  | YWWPLMLPF NA  | NA |
| 79  | 118 | YHWMPLMLPF NA | NA |
| 40  | 68  | ANWHPLMLPF NA | NA |
| 65  | 75  | MVPHMLAGVA NA | NA |
| 108 | 159 | MVPHMLWGSH NA | NA |
| 87  | 133 | MVPHMLLSLW NA | NA |
| 93  | 136 | MVPHMLWRRK NA | NA |
| 236 | 246 | MVPHMLSYQH NA | NA |
| 58  | 85  | CKFMMLLMKQ NA | NA |
| 78  | 111 | HQVEMLLMKQ NA | NA |
| 106 | 126 | HNPNMMLMKQ NA | NA |
| 44  | 46  | SNFEALIAND NA | NA |
| 21  | 32  | PQFHALIAND NA | NA |
| 56  | 73  | RQHNALIAND NA | NA |
| 106 | 154 | QVLHSLRANW NA | NA |
| 137 | 176 | TVLHSLRRWT NA | NA |
| 80  | 83  | AVLHSLRYWQ NA | NA |



|     |                   |    |
|-----|-------------------|----|
| 85  | 122 FVLHSLRANL NA | NA |
| 68  | 95 MVLHSLRAMG NA  | NA |
| 99  | 93 DVLHSLRNHF NA  | NA |
| 71  | 73 RVLHSLRVLG NA  | NA |
| 50  | 86 VVLHSLRGRR NA  | NA |
| 98  | 106 SVLHSLRDHV NA | NA |
| 84  | 102 HVLHSLRNSV NA | NA |
| 100 | 99 CVLHSLRSGH NA  | NA |
| 50  | 70 TAPINLRGWV NA  | NA |
| 67  | 94 HIYAKLIVRY NA  | NA |
| 42  | 65 AHYAKLIVRG NA  | NA |
| 71  | 107 MDYAGLRQGW NA | NA |
| 48  | 71 GIYAGLRQSY NA  | NA |
| 104 | 131 LIYAGLRQHR NA | NA |
| 139 | 184 EHYAGLRQMY NA | NA |
| 46  | 57 WIYAGLRQTI NA  | NA |
| 71  | 78 KFYAGLRQSG NA  | NA |
| 79  | 105 TNYAGLRQGT NA | NA |
| 74  | 78 ATYAGLRQHH NA  | NA |
| 43  | 55 PDYAGLRQTT NA  | NA |
| 65  | 86 AFYAGLRQHI NA  | NA |
| 40  | 61 SQPWGLLEGA NA  | NA |
| 32  | 44 NDPWGLLESY NA  | NA |
| 14  | 16 KAPWGLLEGR NA  | NA |
| 23  | 30 KPPWGLLENS NA  | NA |
| 31  | 30 GNPWGLLETI NA  | NA |
| 40  | 54 RPPWGLLEGA NA  | NA |
| 72  | 83 CNPWGLLETR NA  | NA |
| 38  | 52 LKPWGLLEGI NA  | NA |
| 22  | 26 APPWGLLERK NA  | NA |
| 18  | 24 KAMWFLRMWI NA  | NA |
| 82  | 97 PPMWALRMWI NA  | NA |
| 233 | 327 FHHNGLRMWI NA | NA |
| 96  | 102 DILRHLLRKK NA | NA |
| 18  | 21 DILRHLLMEG NA  | NA |
| 59  | 79 TMAHPLWDRF NA  | NA |
| 42  | 59 TMAHPLWKGS NA  | NA |
| 51  | 62 TMAHPLWKTI NA  | NA |
| 39  | 45 CCAMGLTAHA NA  | NA |
| 27  | 30 CCAMGLTVKQ NA  | NA |
| 48  | 57 CCAMGLWVTL NA  | NA |

|     |                    |    |
|-----|--------------------|----|
| 125 | 135 CCAMGLSRLA NA  | NA |
| 51  | 66 SMPRMLLDGG NA   | NA |
| 93  | 91 SMPRMLRRQQ NA   | NA |
| 99  | 163 SMPRMLWGHW NA  | NA |
| 70  | 70 SMPRMLFGNY NA   | NA |
| 92  | 110 SMPRMLALHI NA  | NA |
| 75  | 91 SMPRMLWQHS NA   | NA |
| 58  | 71 SMPRMLSGNS NA   | NA |
| 191 | 247 PGVRFLSQKW NA  | NA |
| 87  | 92 PGVRFLSGRL NA   | NA |
| 50  | 64 GKVRMLRRQI NA   | NA |
| 79  | 90 ESVRMLRRHI NA   | NA |
| 119 | 146 CNVRMLRRWR NA  | NA |
| 209 | 220 HQVRMLRRST NA  | NA |
| 301 | 358 VQVRMLRRAL NA  | NA |
| 96  | 132 ETVRMLRREQ NA  | NA |
| 41  | 45 QYVRMLRRTS NA   | NA |
| 66  | 78 DTVRMLRRIY NA   | NA |
| 104 | 150 GDVRMLRRVV NA  | NA |
| 85  | 82 SLYRALLRTW NA   | NA |
| 24  | 30 SLYRALISEI NA   | NA |
| 51  | 62 SLYRALWNWR NA   | NA |
| 59  | 76 SLYRALWVAY NA   | NA |
| 65  | 76 SLYRALSMQG NA   | NA |
| 38  | 41 SLYRALLGST NA   | NA |
| 66  | 73 SLYRALLDMR NA   | NA |
| 79  | 94 KPVWGIRYRV NA   | NA |
| 6   | 4 SMVWGIRYLH NA    | NA |
| 38  | 52 MPVWGIRYLW NA   | NA |
| 48  | 50 GFVWGIRYTL NA   | NA |
| 86  | 107 KNVWGIRYRL NA  | NA |
| 54  | 56 NMVWGIRYGG NA   | NA |
| 34  | 38 WYVWGIRYSL NA   | NA |
| 40  | 38 IYVWGIRYRY NA   | NA |
| 69  | 94 MNVWGIRYSL NA   | NA |
| 60  | 64 PSVWGIRYRQ NA   | NA |
| 57  | 58 ELYASLIYGG NA   | NA |
| 90  | 116 VHVHALMGKH NA  | NA |
| 108 | 152 VHVHALWGEK NA  | NA |
| 30  | 26 VHVHALLLL LV NA | NA |
| 19  | 14 DIYGLRNTG NA    | NA |

|     |     |                |    |
|-----|-----|----------------|----|
| 59  | 69  | HMIYGLRNLK NA  | NA |
| 86  | 109 | MHIYGLRNTK NA  | NA |
| 21  | 31  | QRIYGLRNSI NA  | NA |
| 29  | 31  | IMIYGLRNSG NA  | NA |
| 82  | 119 | KPIYGLRNHL NA  | NA |
| 106 | 142 | GDIYGLRNWH NA  | NA |
| 68  | 75  | DQIYGLRNAW NA  | NA |
| 43  | 46  | LQIYGLRNIQ NA  | NA |
| 50  | 86  | RVIRHLTQMY NA  | NA |
| 14  | 43  | RVIRHLINVK NA  | NA |
| 48  | 63  | RVIRHLTNRL NA  | NA |
| 93  | 98  | DRIRHLWYER NA  | NA |
| 73  | 94  | DRIRHLWKWV NA  | NA |
| 106 | 145 | DRIRHLIMRL NA  | NA |
| 61  | 84  | FHIAHLTGKT NA  | NA |
| 36  | 43  | VIVAALWVPF NA  | NA |
| 45  | 61  | TVLRSLLMAS NA  | NA |
| 16  | 18  | MRPMNLRKGI NA  | NA |
| 64  | 67  | ARPMNLRQY NA   | NA |
| 70  | 99  | SRPMNLRRLNT NA | NA |
| 39  | 51  | FRPMNLRMTY NA  | NA |
| 76  | 117 | NRPMNLRRLNA NA | NA |
| 77  | 105 | IRPMNLRQGG NA  | NA |
| 32  | 46  | FRPMNLRGHA NA  | NA |
| 43  | 38  | RRPMNLRKGY NA  | NA |
| 135 | 170 | SRPMNLRRLHH NA | NA |
| 49  | 49  | HRPMNLRQSG NA  | NA |
| 38  | 53  | SIPNALAVGV NA  | NA |
| 121 | 179 | SIPNALRVMI NA  | NA |
| 37  | 49  | SIPNALTQVH NA  | NA |
| 60  | 58  | SIPNALMVHR NA  | NA |
| 25  | 35  | SIPNALIKPI NA  | NA |
| 44  | 51  | PSPRAILRIL NA  | NA |
| 62  | 58  | VWGRALWGVK NA  | NA |
| 57  | 64  | VWGRALWAKF NA  | NA |
| 49  | 50  | VWGRALWDQS NA  | NA |
| 95  | 137 | DTVRHLSYHR NA  | NA |
| 31  | 51  | DTVRHLSRIK NA  | NA |
| 71  | 66  | WTVRHLSREY NA  | NA |
| 63  | 64  | QTVRHLSGNW NA  | NA |
| 71  | 94  | FTVRHLSRGI NA  | NA |

|     |     |               |    |
|-----|-----|---------------|----|
| 66  | 69  | CTVRHLSQTV NA | NA |
| 78  | 87  | GTVRHLSYGG NA | NA |
| 49  | 48  | KTVRHLSRPF NA | NA |
| 38  | 35  | TTVRHLSNQF NA | NA |
| 43  | 36  | ATVRHLSGMG NA | NA |
| 74  | 84  | GTVRHLSMRH NA | NA |
| 76  | 108 | VDILHLWATG NA | NA |
| 31  | 32  | RVPRGLLYSL NA | NA |
| 90  | 96  | RVPRGLKMQT NA | NA |
| 50  | 60  | RVPRGLSAQT NA | NA |
| 5   | 5   | RVPRGLKKNQ NA | NA |
| 100 | 116 | RVPRGLRYWG NA | NA |
| 29  | 43  | RVPRGLSQQY NA | NA |
| 28  | 51  | NRPHPLSDQI NA | NA |
| 57  | 88  | FRPHPLSYGS NA | NA |
| 78  | 100 | YRPHPLSVWG NA | NA |
| 34  | 39  | RRPHPLSKHG NA | NA |
| 38  | 61  | CRPHPLSYEI NA | NA |
| 92  | 97  | SRPHPLSLTG NA | NA |
| 51  | 46  | RRPHPLSVQY NA | NA |
| 75  | 79  | DRPHPLSYGG NA | NA |
| 37  | 55  | MRPHPLSDMG NA | NA |
| 44  | 54  | TAPMGMRNTR NA | NA |
| 41  | 49  | RDPMGMRNKH NA | NA |
| 79  | 87  | NMPMGMRNGA NA | NA |
| 63  | 73  | FDPMGMRNGF NA | NA |
| 56  | 78  | WMPMGMRNGV NA | NA |
| 94  | 120 | RWPMGMRNWX NA | NA |
| 40  | 62  | GTPMGMRNHI NA | NA |
| 9   | 7   | VYPMGMRNSS NA | NA |
| 30  | 43  | DAPMGMRNQI NA | NA |
| 130 | 143 | CKPMGMRNAH NA | NA |
| 47  | 70  | NQPMGMRNQO NA | NA |
| 6   | 9   | QRANSIWGKA NA | NA |
| 47  | 77  | YLPRAISRNV NA | NA |
| 37  | 39  | YLPRAISRQS NA | NA |
| 29  | 38  | SRVRNLLSTY NA | NA |
| 41  | 58  | SKIRFLWGKY NA | NA |
| 55  | 55  | TAVRSLIREL NA | NA |
| 42  | 46  | TAVRSLIMNR NA | NA |
| 65  | 91  | CCSLALWSGY NA | NA |

|     |     |                |    |
|-----|-----|----------------|----|
| 18  | 21  | MVVRHLWVWW NA  | NA |
| 143 | 151 | MVVRHLSQLW NA  | NA |
| 73  | 91  | MVVRHLWQSK NA  | NA |
| 53  | 68  | KSPRMLLKHY NA  | NA |
| 71  | 71  | KSPRMLIGQQ NA  | NA |
| 66  | 83  | KSPRMLAAWF NA  | NA |
| 50  | 49  | KSPRMLFYQT NA  | NA |
| 61  | 54  | SLPAHIWNVG NA  | NA |
| 83  | 104 | SLPAHIIRWT NA  | NA |
| 51  | 52  | PYAENLADRQ NA  | NA |
| 82  | 82  | WLYAHYWQQY NA  | NA |
| 38  | 41  | NDLAHIWSMF NA  | NA |
| 70  | 78  | TLPHSLSRTV NA  | NA |
| 11  | 14  | TLPHSLLMRG NA  | NA |
| 42  | 51  | GQPRNLSNSG NA  | NA |
| 49  | 50  | LQPRNLSRVA NA  | NA |
| 56  | 64  | AQPRNLSGHI NA  | NA |
| 39  | 51  | LQPRNLSYTA NA  | NA |
| 65  | 76  | IQPRNLSRMT NA  | NA |
| 62  | 97  | WQPRNLSMKF NA  | NA |
| 57  | 73  | PQPRNLSGRG NA  | NA |
| 38  | 50  | DQPRNLSYHS NA  | NA |
| 78  | 86  | SRPRMLRANI NA  | NA |
| 25  | 24  | SRPRMLMAGV NA  | NA |
| 49  | 41  | SRPRMLSNKV NA  | NA |
| 16  | 30  | SRPRMLMGNA NA  | NA |
| 36  | 43  | SRPRMLSNSH NA  | NA |
| 54  | 69  | YNVNYLWL GK NA | NA |
| 42  | 59  | YNVNYLWLHI NA  | NA |
| 47  | 63  | YNVNYLWSAK NA  | NA |
| 219 | 277 | RHMLGLRLLS NA  | NA |
| 54  | 80  | RHMLGLTGII NA  | NA |
| 35  | 39  | RHMLGLSVTT NA  | NA |
| 30  | 41  | RHMLGLTGAF NA  | NA |
| 41  | 41  | VKVWGLRGGY NA  | NA |
| 33  | 40  | VKVWGLSQNT NA  | NA |
| 32  | 44  | VKVWGLLYEW NA  | NA |
| 32  | 42  | VKVWGLAGNY NA  | NA |
| 83  | 112 | FWWHALTSRF NA  | NA |
| 105 | 135 | FHMRALTSRF NA  | NA |
| 77  | 92  | CPHMALTHIT NA  | NA |

|     |     |            |    |    |
|-----|-----|------------|----|----|
| 84  | 85  | IMFHNLTFLA | NA | NA |
| 38  | 36  | KSPAYLWGMS | NA | NA |
| 38  | 48  | SPAHGLTGQW | NA | NA |
| 7   | 8   | SPAHGLAAPQ | NA | NA |
| 69  | 74  | SPAHGLTGHH | NA | NA |
| 53  | 88  | SPAHGLRVKS | NA | NA |
| 80  | 107 | SPAHGLWGPA | NA | NA |
| 21  | 36  | SPAHGLLSTW | NA | NA |
| 19  | 23  | PRVHALREKV | NA | NA |
| 43  | 68  | TSMWALREKV | NA | NA |
| 74  | 88  | QPFNALREKV | NA | NA |
| 118 | 104 | IRSWALREKV | NA | NA |
| 38  | 33  | RNVNFLWDHQ | NA | NA |
| 60  | 65  | CQPAHLSQMT | NA | NA |
| 56  | 83  | QQPAHLSGAR | NA | NA |
| 50  | 47  | RQPAHLSGQT | NA | NA |
| 44  | 57  | MQPAHLSATT | NA | NA |
| 77  | 84  | TQPAHLSYWG | NA | NA |
| 47  | 52  | EQPAHLSGKS | NA | NA |
| 174 | 194 | WQPAHLSAWQ | NA | NA |
| 50  | 58  | NQPAHLSLIT | NA | NA |
| 59  | 62  | WQPAHLSYTI | NA | NA |
| 59  | 58  | KQPAHLSNRQ | NA | NA |
| 54  | 53  | EAVGNLRDSQ | NA | NA |
| 35  | 30  | EAVGNLRGWG | NA | NA |
| 115 | 127 | EAVGNLWYAH | NA | NA |
| 76  | 70  | FRVEPLWYQV | NA | NA |
| 52  | 61  | FRVEPLAYMY | NA | NA |
| 61  | 64  | FRVEPLIYWK | NA | NA |
| 71  | 92  | ARVGVLRRGF | NA | NA |
| 44  | 45  | ARVGVLIRIK | NA | NA |
| 30  | 38  | ARVGVLWLHA | NA | NA |
| 29  | 32  | ARVGVLRQVF | NA | NA |
| 38  | 49  | ARVGVLRYQV | NA | NA |
| 72  | 77  | ARVGVLRSLV | NA | NA |
| 20  | 32  | PSPRYLLSII | NA | NA |
| 51  | 68  | PSPRYLADHV | NA | NA |
| 61  | 73  | PSPRYLANHH | NA | NA |
| 71  | 78  | SRAWGLIDNR | NA | NA |
| 67  | 70  | GRAWGLIREY | NA | NA |
| 134 | 165 | NRAWGLIMLA | NA | NA |

|     |     |               |    |
|-----|-----|---------------|----|
| 110 | 154 | ERAWGLIDVH NA | NA |
| 79  | 74  | YRAWGLIAWT NA | NA |
| 70  | 73  | IRAWGLIRIQ NA | NA |
| 27  | 41  | RRAWGLISSH NA | NA |
| 25  | 21  | VRAWGLIQTY NA | NA |
| 46  | 48  | RRAWGLISGL NA | NA |
| 71  | 90  | CRAWGLIRGS NA | NA |
| 18  | 29  | RRAWGLIDKF NA | NA |
| 52  | 49  | HSWEFLVAKA NA | NA |
| 71  | 86  | DLPHCLARTT NA | NA |
| 58  | 53  | NSHMALIGAQ NA | NA |
| 123 | 128 | LMYHSLTFNT NA | NA |
| 87  | 114 | MIYHSLTFNT NA | NA |
| 33  | 37  | GQPNFLIQNL NA | NA |
| 61  | 72  | GQPNFLWRTY NA | NA |
| 49  | 57  | GQPNFLIKHG NA | NA |
| 57  | 75  | GRPHSLSVWK NA | NA |
| 79  | 79  | GRYYSLSVWK NA | NA |
| 59  | 104 | PDFMSLSVWK NA | NA |
| 29  | 42  | TQPRSLSQKG NA | NA |
| 42  | 58  | LQPRSLSQWT NA | NA |
| 32  | 33  | MIPRSLSQTI NA | NA |
| 46  | 54  | QYPRSLSQSH NA | NA |
| 43  | 62  | QDPRSLSQTY NA | NA |
| 51  | 70  | QDPRSLSQKK NA | NA |
| 100 | 122 | FKPRSLSQRK NA | NA |
| 35  | 41  | QYPRSLSQNI NA | NA |
| 81  | 111 | PDPRSLSQMV NA | NA |
| 136 | 205 | CKVYPLRARL NA | NA |
| 172 | 230 | THWRPLRARL NA | NA |
| 125 | 151 | GHMVPLRARL NA | NA |
| 69  | 84  | PQPEPLRARL NA | NA |
| 39  | 46  | VDVSFLYGRY NA | NA |
| 62  | 72  | ESIRGLYNTQ NA | NA |
| 87  | 92  | VLLGNFQKWS NA | NA |
| 34  | 53  | SVPSAIQSLW NA | NA |
| 32  | 61  | RKLAFLYKGI NA | NA |
| 55  | 41  | RKLAFLYAPH NA | NA |
| 44  | 68  | HVLRNLIREQ NA | NA |
| 38  | 52  | IVLRNLISIT NA | NA |
| 9   | 11  | VVLRNLIYPH NA | NA |

|    |                   |    |
|----|-------------------|----|
| 43 | 53 FVLRNLIQRL NA  | NA |
| 31 | 43 NVLRNLIQER NA  | NA |
| 17 | 16 GVLRNLIQNH NA  | NA |
| 56 | 62 TVLRNLIATL NA  | NA |
| 12 | 28 IVLRNLIQY NA   | NA |
| 27 | 24 RVLRLNLIQWG NA | NA |
| 30 | 42 QVLRNLIQHK NA  | NA |
| 54 | 57 HVLRNLIQGG NA  | NA |
| 51 | 86 LQIGHLYNWF NA  | NA |
| 10 | 4 RVVANLQRPY NA   | NA |
| 34 | 39 LGPSHYQLPG NA  | NA |
| 35 | 37 MWVLSLYMGV NA  | NA |
| 19 | 19 FYFSNLLMWI NA  | NA |
| 39 | 42 PKLAAIQYES NA  | NA |
| 73 | 79 VQLAYFQGIW NA  | NA |
| 29 | 18 RDMSYLAVES NA  | NA |
| 59 | 70 RDMSYLIYRS NA  | NA |
| 35 | 53 RDMSYLAYSS NA  | NA |
| 41 | 57 RDMSYLKRQF NA  | NA |
| 67 | 79 RDMSYLYVHS NA  | NA |
| 32 | 48 RDMSYLLDNG NA  | NA |
| 56 | 78 RDMSYLWKLF NA  | NA |
| 47 | 51 RDMSYLAVIT NA  | NA |
| 24 | 36 GYFANLLAQL NA  | NA |
| 71 | 73 NPPSHLYDHV NA  | NA |
| 59 | 80 TMLLALYGKF NA  | NA |
| 46 | 48 TMLLALYSSA NA  | NA |
| 7  | 23 WGTALVLNG NA   | NA |
| 25 | 27 WGTALQKPS NA   | NA |
| 73 | 79 WGTALVSKW NA   | NA |
| 65 | 81 RLVNWMQSAK NA  | NA |
| 61 | 66 RLVNWMYLVG NA  | NA |
| 51 | 55 RLVNWMVQSF NA  | NA |
| 54 | 78 RLVNWMYGGG NA  | NA |
| 41 | 60 HTVYWMLKVK NA  | NA |
| 27 | 27 HTVYWMILSG NA  | NA |
| 4  | 1 IGVRQLLMQF NA   | NA |
| 22 | 39 TLIRYLLATY NA  | NA |
| 27 | 29 WPVAGLYSER NA  | NA |
| 40 | 33 ADVAGLYSEQ NA  | NA |
| 24 | 32 SHVAGLYSEH NA  | NA |



|     |     |               |    |
|-----|-----|---------------|----|
| 67  | 69  | WMVAGLYSEH NA | NA |
| 63  | 81  | HMVAGLYSIA NA | NA |
| 55  | 66  | GWVAGLYSKS NA | NA |
| 79  | 76  | CIVAGLYSSL NA | NA |
| 52  | 64  | ERVAGLYSNH NA | NA |
| 87  | 101 | GFVAGLYSAS NA | NA |
| 36  | 39  | EHVAGLYSEI NA | NA |
| 83  | 72  | FYVAGLYSIV NA | NA |
| 32  | 44  | GFTRWLYKPY NA | NA |
| 41  | 64  | GFTRWLLGHS NA | NA |
| 27  | 39  | GFTRWLLGRT NA | NA |
| 160 | 204 | GFTRWLYDHR NA | NA |
| 41  | 64  | GFTRWLYGWH NA | NA |
| 21  | 45  | GFTRWLLVQA NA | NA |
| 32  | 54  | GFTRWLYRVI NA | NA |
| 46  | 43  | WQVRYLQQST NA | NA |
| 57  | 62  | WQVRYLKKGY NA | NA |
| 24  | 30  | QRWFALIRNI NA | NA |
| 43  | 50  | QRWFALVSSA NA | NA |
| 9   | 17  | QRWFALIVVF NA | NA |
| 26  | 43  | TNVFWYLVAI NA | NA |
| 63  | 61  | TNVFWYLDAL NA | NA |
| 49  | 70  | VVPNNLVMGW NA | NA |
| 28  | 27  | VVPNNLYAPI NA | NA |
| 29  | 49  | ESIRHLVAKI NA | NA |
| 81  | 79  | KPGRAMYGTW NA | NA |
| 39  | 57  | FHMRAMYGTT NA | NA |
| 52  | 48  | VHGRAMYGTG NA | NA |
| 51  | 64  | GQGRAMYGTS NA | NA |
| 34  | 26  | FISRAMYGTR NA | NA |
| 68  | 75  | EKSRAMYGTA NA | NA |
| 6   | 8   | SKPNFLYNGH NA | NA |
| 25  | 18  | LSVFWLYNLR NA | NA |
| 22  | 29  | LSVFWLQRWK NA | NA |
| 37  | 51  | LSVFWLIYEK NA | NA |
| 38  | 40  | VFTRNLYMRI NA | NA |
| 26  | 14  | VFTRNLYMPT NA | NA |
| 2   | 2   | VFTRNLQLMF NA | NA |
| 57  | 63  | VFTRNLAGGW NA | NA |
| 39  | 66  | VFTRNLLRPT NA | NA |
| 32  | 33  | VFTRNLAGKY NA | NA |

|     |                     |    |
|-----|---------------------|----|
| 26  | 34 VFTRNLQONIA NA   | NA |
| 24  | 45 VFTRNLLGGY NA    | NA |
| 68  | 81 DPWRALVKMQ NA    | NA |
| 63  | 58 LVGRALQQPV NA    | NA |
| 27  | 39 RLANALIDGG NA    | NA |
| 92  | 94 KLGRALYMKV NA    | NA |
| 52  | 86 KLGRALISVT NA    | NA |
| 62  | 86 TMVQHLLIVWS NA   | NA |
| 39  | 38 RMVQHLLIDPS NA   | NA |
| 71  | 79 DMVQHLLIMHT NA   | NA |
| 30  | 38 GMVQHLLIGTV NA   | NA |
| 27  | 36 DMVQHLLISPI NA   | NA |
| 67  | 82 IMVQHLLIYKK NA   | NA |
| 65  | 126 HMQVHLLIMIQA NA | NA |
| 44  | 50 IMVQHLLIQAG NA   | NA |
| 40  | 60 VMVQHLLIKGV NA   | NA |
| 120 | 140 HMQVHLLIQWH NA  | NA |
| 62  | 47 LMVQHLLISPR NA   | NA |
| 11  | 17 ERSLNLYMSR NA    | NA |
| 21  | 24 ERSLNLYMSI NA    | NA |
| 29  | 32 ERSLNLAQKG NA    | NA |
| 6   | 7 ERSLNLQRVQ NA     | NA |
| 35  | 36 ERSLNLADSG NA    | NA |
| 67  | 74 DRPNYLIYNA NA    | NA |
| 55  | 58 AVANSLYANQ NA    | NA |
| 19  | 27 AVANSLYYQT NA    | NA |
| 59  | 59 VLWRALYMEEL NA   | NA |
| 146 | 159 VLWRALYNHY NA   | NA |
| 49  | 51 KKWRGLVYGR NA    | NA |
| 59  | 70 KKWRGLVKQY NA    | NA |
| 57  | 70 KTWRNLILIQ NA    | NA |
| 69  | 73 KTWRNLYRVL NA    | NA |
| 50  | 76 KTWRNLIVGW NA    | NA |
| 7   | 12 KTWRNLILQK NA    | NA |
| 49  | 65 KTWRNLIGVH NA    | NA |
| 80  | 94 KTWRNLIMNS NA    | NA |
| 110 | 143 HRWSALYGQY NA   | NA |
| 73  | 102 HRWSALQMNK NA   | NA |
| 69  | 72 HRWSALVLGG NA    | NA |
| 110 | 144 HRWSALKMAH NA   | NA |
| 178 | 230 HRWSALQGHV NA   | NA |

|     |     |                |    |
|-----|-----|----------------|----|
| 155 | 214 | HRWSALYARS NA  | NA |
| 108 | 148 | HRWSALFVEQ NA  | NA |
| 58  | 97  | HRWSALIYEF NA  | NA |
| 90  | 107 | ERFSLVMQL NA   | NA |
| 27  | 35  | ERFSLVATA NA   | NA |
| 30  | 34  | ERFSLVDHI NA   | NA |
| 52  | 61  | VIYGNLYQRL NA  | NA |
| 17  | 18  | VRWSWLQLEH NA  | NA |
| 34  | 27  | VRWSWLFMI NA   | NA |
| 22  | 38  | VRWSWLLGR NA   | NA |
| 58  | 56  | VRWSWLIRWG NA  | NA |
| 43  | 33  | VRWSWLKGGT NA  | NA |
| 10  | 12  | VRWSWLQDTI NA  | NA |
| 43  | 58  | VRWSWLRNQR NA  | NA |
| 28  | 48  | VRWSWLVQES NA  | NA |
| 17  | 31  | VRWSWLQGAT NA  | NA |
| 18  | 4   | VRWSWLVYIF NA  | NA |
| 195 | 214 | HQWAALKKWA NA  | NA |
| 56  | 84  | HQWAALKARH NA  | NA |
| 59  | 72  | HQWAALVRII NA  | NA |
| 21  | 29  | YDSRGLQLNV NA  | NA |
| 41  | 47  | YDSRGLQGGQ NA  | NA |
| 39  | 34  | YDSRGLYYMI NA  | NA |
| 54  | 60  | YDSRGLKRPK NA  | NA |
| 43  | 47  | YDSRGLVRKI NA  | NA |
| 82  | 86  | APYNHLVMPK NA  | NA |
| 93  | 91  | APYNHLYGGT NA  | NA |
| 77  | 68  | GHAYHLQLKL NA  | NA |
| 126 | 135 | GHAYHLYKKG NA  | NA |
| 32  | 39  | GHAYHLQVKT NA  | NA |
| 73  | 103 | GHAYHLIKLG NA  | NA |
| 75  | 107 | RRMLHLRRLPK NA | NA |
| 100 | 90  | GRMLHLRKRH NA  | NA |
| 83  | 121 | MRMLHLRDWR NA  | NA |
| 53  | 49  | WRMLHLRYEW NA  | NA |
| 97  | 145 | QRMLHLRGHF NA  | NA |
| 106 | 142 | KRMLHLRDPR NA  | NA |
| 70  | 92  | VRMLHLRDPI NA  | NA |
| 54  | 94  | FRMLHLRMSI NA  | NA |
| 34  | 46  | SRMLHLRRMF NA  | NA |
| 21  | 23  | QRMLHLRLSS NA  | NA |

|     |                   |    |
|-----|-------------------|----|
| 56  | 81 RQWYGIKRSQ NA  | NA |
| 46  | 65 RQWYGIQDQR NA  | NA |
| 61  | 69 RQWYGIKGLF NA  | NA |
| 47  | 50 AAWASIHRTT NA  | NA |
| 13  | 12 AAWASIHQL NA   | NA |
| 42  | 73 AAWASIYNEK NA  | NA |
| 66  | 62 AAWASIVVHA NA  | NA |
| 52  | 74 KAVNHLLVWL NA  | NA |
| 65  | 61 KAVNHLLGGR NA  | NA |
| 69  | 71 KAVNHLLALNL NA | NA |
| 49  | 74 KAVNHLLKGAH NA | NA |
| 83  | 101 TTPYHIYQRR NA | NA |
| 82  | 81 TTPYHIQMAR NA  | NA |
| 12  | 22 STIRMLYSKG NA  | NA |
| 2   | 2 IDGSNLRILQ NA   | NA |
| 77  | 84 PKMSHLQGGK NA  | NA |
| 143 | 187 PKMSHLRVHT NA | NA |
| 62  | 61 PKMSHLVVTI NA  | NA |
| 180 | 220 PKMSHLRQSA NA | NA |
| 110 | 144 PKMSHLRGGV NA | NA |
| 117 | 148 PKMSHLRMTQ NA | NA |
| 33  | 33 GDSSWLWATP NA  | NA |
| 26  | 35 FDSRDLRVLK NA  | NA |
| 39  | 37 EPGYNLRVLK NA  | NA |
| 66  | 89 VKGAYLRVLK NA  | NA |
| 74  | 97 SNLNHIMLH NA   | NA |
| 71  | 88 TFWGALQKLR NA  | NA |
| 51  | 58 TFWGALVATR NA  | NA |
| 17  | 24 TRIAYLQRKF NA  | NA |
| 15  | 20 TRIAYLYLAF NA  | NA |
| 41  | 61 TRIAYLYGMQ NA  | NA |
| 9   | 11 YDVYNLQKPF NA  | NA |
| 32  | 37 YDVYNLYGNW NA  | NA |
| 45  | 47 YDVYNLALKQ NA  | NA |
| 35  | 34 YDVYNLYYGY NA  | NA |
| 102 | 144 LSSYALRVRG NA | NA |
| 53  | 59 ARSYNLLYPF NA  | NA |
| 54  | 41 ARSYNLLSMK NA  | NA |
| 21  | 24 ARSYNLRNEY NA  | NA |
| 53  | 65 ARSYNLLDEK NA  | NA |
| 29  | 33 ARSYNLQKHL NA  | NA |

|     |     |               |    |
|-----|-----|---------------|----|
| 31  | 42  | ARSYNLLRRG NA | NA |
| 6   | 16  | ARSYNLASVR NA | NA |
| 59  | 52  | HVWMNLKGRK NA | NA |
| 92  | 105 | HVWMNLIRKW NA | NA |
| 172 | 226 | HVWMNLHKRR NA | NA |
| 169 | 240 | HVWMNLHYGH NA | NA |
| 40  | 44  | HVWMNLKRLK NA | NA |
| 79  | 93  | SKMAHLYKQA NA | NA |
| 57  | 66  | SKMAHLLLAR NA | NA |
| 101 | 153 | SKMAHLKLHF NA | NA |
| 45  | 75  | SKMAHLKMGY NA | NA |
| 19  | 7   | FSVSFLQQWT NA | NA |
| 6   | 14  | TSVSFLQQHW NA | NA |
| 5   | 2   | NRVSFLQQMQ NA | NA |
| 2   | 6   | NYVSFLQQAR NA | NA |
| 2   | 2   | DAVSFLQQIG NA | NA |
| 10  | 11  | YVVSFLQQST NA | NA |
| 11  | 9   | MDVSFLQQVQ NA | NA |
| 0   | 2   | SPVSFLQQPK NA | NA |
| 8   | 14  | RKVSFLQQHH NA | NA |
| 6   | 11  | RMVSFLQQGY NA | NA |
| 64  | 59  | RTGLYLYNST NA | NA |
| 21  | 30  | RTGLYLYSKT NA | NA |
| 50  | 43  | RTGLYLIQGG NA | NA |
| 28  | 32  | RTGLYLKNKR NA | NA |
| 32  | 33  | RTGLYLQQGL NA | NA |
| 23  | 26  | RTGLYLIRQI NA | NA |
| 52  | 75  | RTGLYLAGVR NA | NA |
| 17  | 18  | RQWRALYNGR NA | NA |
| 36  | 56  | RQWRALVYEF NA | NA |
| 36  | 57  | RQWRALYQWY NA | NA |
| 53  | 61  | RQWRALYLVG NA | NA |
| 45  | 57  | RQWRALYATG NA | NA |
| 70  | 100 | SVGLYLVNKR NA | NA |
| 137 | 165 | SVGLYLRYPH NA | NA |
| 61  | 85  | SVGLYLIYRG NA | NA |
| 40  | 35  | SVGLYLYDTA NA | NA |
| 83  | 101 | HRVYWLRSGI NA | NA |
| 41  | 60  | LNvyWLRSEV NA | NA |
| 106 | 137 | HWVYWLRSHG NA | NA |
| 23  | 39  | LTvyWLRSEG NA | NA |

|     |                   |    |
|-----|-------------------|----|
| 127 | 126 HAVYWLRSGL NA | NA |
| 105 | 113 MTVYWLRSQS NA | NA |
| 107 | 122 NIVYWLRSGL NA | NA |
| 63  | 76 AYVYWLRSLG NA  | NA |
| 50  | 56 DSVYWLRSPA NA  | NA |
| 39  | 48 TKMAWLKKQV NA  | NA |
| 42  | 48 TKMAWLKQNL NA  | NA |
| 66  | 96 TKMAWLMMPA NA  | NA |
| 23  | 53 TKMAWLQKKL NA  | NA |
| 79  | 112 TKMAWLARRI NA | NA |
| 261 | 245 TKMAWLLYTH NA | NA |
| 93  | 125 TKMAWLLRNH NA | NA |
| 37  | 46 TKMAWLYYWV NA  | NA |
| 49  | 37 GFSANLKGWT NA  | NA |
| 40  | 46 DFSANLKNPR NA  | NA |
| 35  | 38 SFSANLKLGF NA  | NA |
| 48  | 70 TFSANLKRLF NA  | NA |
| 32  | 40 TFSANLKGMF NA  | NA |
| 45  | 62 CFSANLKGGY NA  | NA |
| 6   | 6 EFSANLKDSH NA   | NA |
| 47  | 48 WFSANLKRNG NA  | NA |
| 25  | 32 KFSANLKASG NA  | NA |
| 49  | 43 HFSANLKKVK NA  | NA |
| 27  | 29 DNTFHLVNPQ NA  | NA |
| 0   | 3 DNTFHLLIQQ NA   | NA |
| 59  | 59 DNTFHLAGMR NA  | NA |
| 31  | 43 DNTFHLADTA NA  | NA |
| 9   | 13 DNTFHLQLMT NA  | NA |
| 122 | 152 AHYASLVYRW NA | NA |
| 47  | 50 VQQQGLFQTL NA  | NA |
| 45  | 63 VQQQGLKASL NA  | NA |
| 40  | 54 VQQQGLANRH NA  | NA |
| 27  | 29 VQQQGLAQKA NA  | NA |
| 35  | 61 VQQQGLHDPV NA  | NA |
| 35  | 38 VQQQGLVYMI NA  | NA |
| 47  | 50 VQQQGLFDLV NA  | NA |
| 40  | 46 VQQQGLQGIQ NA  | NA |
| 98  | 141 VQQQGLHQHI NA | NA |
| 66  | 82 QSMNSLRAGL NA  | NA |
| 66  | 97 YSMNSLRAAQ NA  | NA |
| 88  | 131 YSMNSLRKWW NA | NA |

|     |                   |    |
|-----|-------------------|----|
| 28  | 29 TSMNSLRGGV NA  | NA |
| 64  | 67 LSMNSLRDAV NA  | NA |
| 65  | 72 FSMNSLRRGG NA  | NA |
| 61  | 68 DSMNSLRQMV NA  | NA |
| 54  | 63 ASMNSLRVVT NA  | NA |
| 115 | 125 CSMNSLRMSW NA | NA |
| 34  | 37 HTSNWLVAIQ NA  | NA |
| 85  | 129 HTSNWLKRQS NA | NA |
| 39  | 48 HTSNWLINPS NA  | NA |
| 61  | 86 HTSNWLVLQP NA  | NA |
| 16  | 27 HTSNWLQSMV NA  | NA |
| 54  | 75 HTSNWLRAKG NA  | NA |
| 48  | 36 HTSNWLANQG NA  | NA |
| 29  | 37 HTSNWLYGGG NA  | NA |
| 77  | 55 PHTASLIYIA NA  | NA |
| 56  | 69 PHTASLIKAW NA  | NA |
| 15  | 21 PHTASLVMIY NA  | NA |
| 58  | 78 PHTASLVDVQ NA  | NA |
| 110 | 122 RSGYHLRHTR NA | NA |
| 132 | 159 LIGYHLRHTG NA | NA |
| 33  | 40 NVVLNLEDTH NA  | NA |
| 26  | 36 LVVLNLEGSV NA  | NA |
| 26  | 31 WVVLNLEQNG NA  | NA |
| 47  | 50 YVVLNLEGRA NA  | NA |
| 15  | 24 RVVLNLESAA NA  | NA |
| 49  | 36 LVVLNLEMMH NA  | NA |
| 15  | 16 FVVLNLEGIS NA  | NA |
| 46  | 36 PVVLNLEKIW NA  | NA |
| 22  | 37 EVVLNLEMSL NA  | NA |
| 29  | 33 MVVLNLEYNR NA  | NA |
| 62  | 72 MSLGYLYGGF NA  | NA |
| 40  | 45 MSLGYLYGLG NA  | NA |
| 69  | 69 ESWFHLLGMS NA  | NA |
| 27  | 29 RAMKHLLGMS NA  | NA |
| 40  | 48 LQYKHLLGMS NA  | NA |
| 213 | 286 SGSRALKMML NA | NA |
| 25  | 52 SGSRALQLVV NA  | NA |
| 36  | 41 SGSRALQQEV NA  | NA |
| 50  | 63 SGSRALVSEL NA  | NA |
| 79  | 100 SGSRALIGAL NA | NA |
| 34  | 43 SGSRALYGET NA  | NA |

|     |     |                |    |
|-----|-----|----------------|----|
| 131 | 148 | SGSRALYANV NA  | NA |
| 120 | 128 | ELSLALRVWV NA  | NA |
| 47  | 43  | ELSLALLQPS NA  | NA |
| 48  | 55  | ELSLALIQEH NA  | NA |
| 23  | 34  | TVVAYIQYMW NA  | NA |
| 32  | 49  | TVVAYILKMV NA  | NA |
| 28  | 33  | TVVAYIQLNF NA  | NA |
| 22  | 28  | TVVAYIYAIW NA  | NA |
| 22  | 27  | TVVAYILSPL NA  | NA |
| 54  | 50  | ERSLAWQYSY NA  | NA |
| 67  | 95  | ERSLAWLYSA NA  | NA |
| 36  | 35  | ERSLAWIKSH NA  | NA |
| 94  | 94  | ERSLAWLAWH NA  | NA |
| 10  | 14  | ERSLAWVYSF NA  | NA |
| 37  | 48  | RLANNLLDPA NA  | NA |
| 17  | 32  | RLANNLQKGS NA  | NA |
| 34  | 50  | RLANNLLNNT NA  | NA |
| 82  | 114 | MKWAAYVYTY NA  | NA |
| 113 | 130 | MKWAAYKDLL NA  | NA |
| 20  | 35  | PKGYALYSEG NA  | NA |
| 30  | 23  | PKGYALLMPG NA  | NA |
| 108 | 105 | PKGYALRRQK NA  | NA |
| 47  | 71  | PKGYALAGLY NA  | NA |
| 48  | 70  | PKGYALIGGQ NA  | NA |
| 32  | 40  | PKGYALYNGT NA  | NA |
| 112 | 156 | PKGYALLAHL NA  | NA |
| 50  | 73  | PKGYALLSTG NA  | NA |
| 79  | 81  | PKGYALAAKQ NA  | NA |
| 58  | 83  | PKGYALAGRR NA  | NA |
| 80  | 81  | HTLMGLYDVL NA  | NA |
| 101 | 138 | STLMGLYALK NA  | NA |
| 75  | 79  | KTLMGLYVPR NA  | NA |
| 62  | 69  | LTLMGLYRGI NA  | NA |
| 36  | 74  | NGLMGLYSMY NA  | NA |
| 54  | 69  | KTLMGLYVWT NA  | NA |
| 45  | 57  | FGLMGLYKGG NA  | NA |
| 48  | 56  | ETLMGLYLYAY NA | NA |
| 89  | 111 | WGLMGLYMST NA  | NA |
| 75  | 87  | AYGSHLVGRQ NA  | NA |
| 45  | 44  | AYGSHLYMVW NA  | NA |
| 46  | 64  | AYGSHLFVMW NA  | NA |



|    |    |                  |    |
|----|----|------------------|----|
| 47 | 52 | AYGSHLQGAR NA    | NA |
| 13 | 22 | AYGSHLQNNV NA    | NA |
| 52 | 70 | AYGSHLRNPL NA    | NA |
| 12 | 24 | AYGSHLSKAQ NA    | NA |
| 45 | 76 | AYGSHLSAGS NA    | NA |
| 49 | 49 | AYGSHLIAPV NA    | NA |
| 13 | 9  | RIVRYLQLTT NA    | NA |
| 62 | 74 | PIVRYLQRWG NA    | NA |
| 34 | 35 | SIVRYLQMRQ NA    | NA |
| 11 | 16 | YIVRYLQLWG NA    | NA |
| 36 | 36 | SIVRYLQDGA NA    | NA |
| 24 | 29 | PIVRYLQDMY NA    | NA |
| 22 | 26 | HIVRYLQMLL NA    | NA |
| 52 | 37 | HIVRYLQAKV NA    | NA |
| 19 | 14 | IIVRYLQGHK NA    | NA |
| 40 | 33 | GIVRYLQKIV NA    | NA |
| 26 | 46 | TATNWLK SMA NA   | NA |
| 24 | 32 | TATNWLILKK NA    | NA |
| 57 | 57 | TATNWL RVRG NA   | NA |
| 19 | 20 | TATNWLQ GTT NA   | NA |
| 27 | 28 | TATNWL L LHW NA  | NA |
| 53 | 58 | TATNWL SRSQ NA   | NA |
| 25 | 22 | TATNWL YGSF NA   | NA |
| 46 | 57 | TATNWL RQNH NA   | NA |
| 46 | 73 | TATNWL MKKL NA   | NA |
| 42 | 58 | DRQLSLK GKF NA   | NA |
| 76 | 90 | DRQLSLR QGK NA   | NA |
| 65 | 74 | DRQLSLM QVA NA   | NA |
| 41 | 62 | FRLRN L VVEA NA  | NA |
| 32 | 30 | VRLRN L VRKT NA  | NA |
| 46 | 92 | RRLRN L VLVR NA  | NA |
| 72 | 73 | IRLRN L VYGS NA  | NA |
| 11 | 22 | ERLRN L V LTI NA | NA |
| 65 | 87 | TRLRN L VAGS NA  | NA |
| 74 | 90 | YRLRN L V NQR NA | NA |
| 60 | 51 | TRLRN L VSGS NA  | NA |
| 69 | 82 | WRLRN L VQRL NA  | NA |
| 35 | 47 | LAWAH I KAMT NA  | NA |
| 23 | 27 | LAWAH I KAWL NA  | NA |
| 76 | 91 | LAWAH I YYHT NA  | NA |
| 46 | 80 | PQMAH L QLSQ NA  | NA |

|     |     |                |    |
|-----|-----|----------------|----|
| 20  | 17  | CPSAHLQLSR NA  | NA |
| 16  | 23  | PIGAHLQLSH NA  | NA |
| 37  | 43  | TVTQONLYMAV NA | NA |
| 55  | 60  | TVTQNLIGWA NA  | NA |
| 23  | 28  | TVTQNLIQNT NA  | NA |
| 23  | 50  | FDSRNLRLQF NA  | NA |
| 54  | 65  | PSWRALVRNR NA  | NA |
| 76  | 75  | PSWRALQMGG NA  | NA |
| 79  | 121 | FTQRGIYAWQ NA  | NA |
| 33  | 36  | TPQRGIYANA NA  | NA |
| 22  | 34  | TNQRGIYAPY NA  | NA |
| 33  | 48  | NDQRGIYAMG NA  | NA |
| 46  | 58  | WMQRGIYAGT NA  | NA |
| 44  | 38  | DAQRGIYAGG NA  | NA |
| 59  | 70  | TNQRGIYAWI NA  | NA |
| 59  | 86  | RYQRGIYAGW NA  | NA |
| 19  | 16  | AMQRGIYANG NA  | NA |
| 30  | 44  | SSQRGIYAAS NA  | NA |
| 54  | 46  | ADQRGIYANL NA  | NA |
| 121 | 137 | MSWSALKLEK NA  | NA |
| 93  | 131 | MSWSALFKMK NA  | NA |
| 86  | 113 | MSWSALIKGY NA  | NA |
| 9   | 10  | MSWSALFLLW NA  | NA |
| 92  | 97  | MSWSALYDEF NA  | NA |
| 101 | 108 | MSWSALYGLG NA  | NA |
| 38  | 70  | MSWSALYSTR NA  | NA |
| 50  | 46  | MSWSALFSKF NA  | NA |
| 44  | 54  | SEWQGLYGQS NA  | NA |
| 18  | 36  | SEWQGLQQLY NA  | NA |
| 147 | 140 | RTASHLYREL NA  | NA |
| 55  | 91  | RTASHLQDHL NA  | NA |
| 60  | 68  | DAVYGLYMGT NA  | NA |
| 22  | 29  | DAVYGLYKEI NA  | NA |
| 135 | 172 | KDYLHLYRNQ NA  | NA |
| 164 | 179 | KDYLHLIMQS NA  | NA |
| 76  | 90  | FPGRHLVARQ NA  | NA |
| 61  | 80  | FPGRHLKSGS NA  | NA |
| 38  | 41  | FPGRHLANLL NA  | NA |
| 76  | 118 | FPGRHLVSRV NA  | NA |
| 90  | 87  | FPGRHLAMTY NA  | NA |
| 49  | 49  | TILRNIQVQA NA  | NA |

|     |                   |    |
|-----|-------------------|----|
| 33  | 41 TILRNIIYLI NA  | NA |
| 29  | 35 TILRNIYNQG NA  | NA |
| 45  | 47 TILRNIILEH NA  | NA |
| 52  | 88 TILRNIIYRA NA  | NA |
| 39  | 37 PAYFPLLGR NA   | NA |
| 9   | 12 SATLNLYNPV NA  | NA |
| 34  | 37 KITLNLYNGS NA  | NA |
| 63  | 82 GHTLNLYNAL NA  | NA |
| 35  | 56 MITLNLYNAR NA  | NA |
| 44  | 73 SRTLNLYNKW NA  | NA |
| 44  | 57 MSTLNLYNNW NA  | NA |
| 31  | 49 PMTLNLYNKT NA  | NA |
| 42  | 67 ARTLNLYNNL NA  | NA |
| 36  | 31 CPTLNLYNMQ NA  | NA |
| 117 | 147 CNTLNLYNRW NA | NA |
| 21  | 29 TNTLNLYNGF NA  | NA |
| 53  | 76 HRQQNLLKTK NA  | NA |
| 99  | 97 HRQQNLKVMH NA  | NA |
| 65  | 87 HRQQNLSKAG NA  | NA |
| 83  | 100 HRQQNLRSGH NA | NA |
| 71  | 88 HRQQNLRAGL NA  | NA |
| 44  | 54 TQVFGLLKLK NA  | NA |
| 52  | 69 TQVFGLLRLLT NA | NA |
| 11  | 30 WRSLALQSPR NA  | NA |
| 32  | 33 WHSLALQSKG NA  | NA |
| 23  | 30 PSSLALQSVW NA  | NA |
| 38  | 35 EYSLALQSGH NA  | NA |
| 112 | 162 YHSLALQSMF NA | NA |
| 14  | 24 HTSLALQSEI NA  | NA |
| 17  | 15 TYSLALQSRV NA  | NA |
| 26  | 27 TDSLALQSNV NA  | NA |
| 19  | 19 RDSLALQSPK NA  | NA |
| 54  | 69 NHSLALQSPS NA  | NA |
| 29  | 29 PPSLALQSNY NA  | NA |
| 39  | 48 VKAYNLAANA NA  | NA |
| 48  | 42 VKAYNLYGWR NA  | NA |
| 35  | 57 QRMASLQGEV NA  | NA |
| 41  | 43 GRVYDLKQNV NA  | NA |
| 37  | 44 RRVYDLKGKK NA  | NA |
| 29  | 33 LRVYDLKGWV NA  | NA |
| 25  | 26 MRVYDLKVGW NA  | NA |

|     |                   |    |
|-----|-------------------|----|
| 70  | 66 VRVYDLKDVBH NA | NA |
| 42  | 45 YRVYDLKGRI NA  | NA |
| 38  | 50 KRVYDLKGAR NA  | NA |
| 44  | 62 PRVYDLKLAV NA  | NA |
| 74  | 88 HRVYDLKMWK NA  | NA |
| 25  | 41 KRVYDLKKHA NA  | NA |
| 24  | 44 VFVSNLQVTV NA  | NA |
| 30  | 31 VFVSNLISNK NA  | NA |
| 76  | 84 ETMLALKDGL NA  | NA |
| 67  | 100 ETMLALKAKS NA | NA |
| 60  | 63 WQYSNLLKQT NA  | NA |
| 39  | 59 WQYSNLIGWK NA  | NA |
| 29  | 38 WQYSNLIAHG NA  | NA |
| 18  | 25 ISVNYLQYSY NA  | NA |
| 31  | 48 ISVNYLKGVS NA  | NA |
| 45  | 51 ISVNYLRVAF NA  | NA |
| 62  | 46 ISVNYLKRNK NA  | NA |
| 18  | 26 ISVNYLQGVK NA  | NA |
| 41  | 34 ISVNYLKGTG NA  | NA |
| 55  | 46 SMGYFLRVKR NA  | NA |
| 25  | 25 GRGNNLRVKR NA  | NA |
| 54  | 46 VPWGNLHMIL NA  | NA |
| 17  | 22 VPWGNLQLLR NA  | NA |
| 46  | 67 VPWGNLYGSA NA  | NA |
| 41  | 39 VPWGNLIQTQ NA  | NA |
| 50  | 58 VPWGNLVVQS NA  | NA |
| 60  | 63 VPWGNLIKRF NA  | NA |
| 14  | 8 FSQLAMYGKT NA   | NA |
| 59  | 76 FSQLAMQKVL NA  | NA |
| 35  | 42 FSQLAMVDRH NA  | NA |
| 32  | 52 FSQLAMVGEV NA  | NA |
| 19  | 19 FSQLAMVLQY NA  | NA |
| 45  | 54 FSQLAMRSGG NA  | NA |
| 26  | 44 FSQLAMYREG NA  | NA |
| 18  | 31 SMGSHLVASG NA  | NA |
| 60  | 79 SMGSHLLRWK NA  | NA |
| 94  | 95 SMGSHLVKHA NA  | NA |
| 56  | 76 SMGSHLYLQG NA  | NA |
| 166 | 204 SMGSHLRSWS NA | NA |
| 41  | 23 SMGSHLFNQS NA  | NA |
| 52  | 76 SMGSHLHNEL NA  | NA |

|     |                   |    |
|-----|-------------------|----|
| 33  | 37 NTSAWLVAWI NA  | NA |
| 19  | 20 NTSAWLADKS NA  | NA |
| 32  | 56 NTSAWLLDRR NA  | NA |
| 34  | 54 NTSAWLLGLG NA  | NA |
| 23  | 49 NTSAWLVNTW NA  | NA |
| 32  | 45 NTSAWLIGGF NA  | NA |
| 86  | 96 EIWLPIFAWT NA  | NA |
| 61  | 74 EIWLPILKHI NA  | NA |
| 53  | 67 EIWLPIQKLG NA  | NA |
| 37  | 56 EIWLPIRLGG NA  | NA |
| 203 | 232 EIWLPIKYHQ NA | NA |
| 43  | 65 EIWLPIRVNF NA  | NA |
| 25  | 40 TVSYALVNWT NA  | NA |
| 33  | 38 TVSYALVGKT NA  | NA |
| 44  | 75 TVSYALVVKQ NA  | NA |
| 50  | 50 TVSYALVNPR NA  | NA |
| 39  | 45 TVSYALYGAV NA  | NA |
| 47  | 39 TVSYALVQRG NA  | NA |
| 37  | 51 NRFSNLVKEH NA  | NA |
| 26  | 27 NRFSNLIYGT NA  | NA |
| 39  | 34 NRFSNLIIRAA NA | NA |
| 14  | 11 ASTLHLQMMR NA  | NA |
| 60  | 65 ASTLHLIGSK NA  | NA |
| 25  | 27 ASTLHLQNGF NA  | NA |
| 26  | 31 ASTLHLTQPV NA  | NA |
| 33  | 48 ASTLHLLKLQ NA  | NA |
| 101 | 109 ASTLHLQMHV NA | NA |
| 65  | 66 ASTLHLYYKG NA  | NA |
| 129 | 142 TKYAYIKLRS NA | NA |
| 99  | 117 TKYAYIKRGW NA | NA |
| 99  | 81 TKYAYIVVLG NA  | NA |
| 65  | 88 TKYAYIIDGI NA  | NA |
| 83  | 92 TKYAYILVEQ NA  | NA |
| 21  | 24 WKVSSLYDMV NA  | NA |
| 55  | 78 WKVSSLQYWK NA  | NA |
| 79  | 101 RTMLHMYNRK NA | NA |
| 87  | 93 RTMLHMYVLLG NA | NA |
| 28  | 29 RTMLHMLDPI NA  | NA |
| 37  | 60 RTMLHMAAMI NA  | NA |
| 67  | 92 RTMLHMYVKVQ NA | NA |
| 64  | 78 RTMLHMYVVRK NA | NA |

|    |     |                |    |
|----|-----|----------------|----|
| 41 | 36  | ESTRNLIIVPF NA | NA |
| 23 | 40  | QSTRNLIKIY NA  | NA |
| 52 | 69  | VSTRNLIGGV NA  | NA |
| 37 | 50  | GSTRNLIQIG NA  | NA |
| 24 | 28  | GSTRNLIKGI NA  | NA |
| 79 | 103 | CSTRNLIVRV NA  | NA |
| 17 | 21  | HSTRNLILPR NA  | NA |
| 47 | 61  | LSTRNLIRQR NA  | NA |
| 42 | 51  | WSTRNLIRGK NA  | NA |
| 48 | 46  | ESTRNLIASW NA  | NA |
| 26 | 34  | YCSLPLIDPL NA  | NA |
| 57 | 69  | HDYFNLLRGF NA  | NA |
| 23 | 19  | VSSYWLMVQ NA   | NA |
| 19 | 32  | VSSYWLLLSQ NA  | NA |
| 3  | 5   | VSSYWLKAHR NA  | NA |
| 64 | 81  | VSSYWLHSRR NA  | NA |
| 18 | 34  | VSSYWLARPV NA  | NA |
| 5  | 12  | VSSYWLLKMG NA  | NA |
| 10 | 18  | VSSYWLHNMV NA  | NA |
| 14 | 15  | VSSYWLFQGA NA  | NA |
| 10 | 12  | VSSYWLSVEY NA  | NA |
| 15 | 21  | VSSYWLRYPI NA  | NA |
| 18 | 22  | FDISHLQYMK NA  | NA |
| 28 | 38  | FDISHLYDTK NA  | NA |
| 34 | 44  | FDISHLYMII NA  | NA |
| 45 | 61  | FDISHLYGEG NA  | NA |
| 83 | 85  | LPVRYLYGIG NA  | NA |
| 38 | 41  | PDVRYLYGEV NA  | NA |
| 25 | 28  | SHVRYLYGSG NA  | NA |
| 7  | 20  | QKVRVLYGLG NA  | NA |
| 57 | 57  | IRVRYLYGGK NA  | NA |
| 66 | 94  | MRVRYLYGWH NA  | NA |
| 33 | 42  | SDVRYLYGGG NA  | NA |
| 17 | 18  | RRVRYLYGSI NA  | NA |
| 26 | 28  | PAVRYLYGTI NA  | NA |
| 57 | 82  | MGMWHLIAVS NA  | NA |
| 58 | 48  | MGMWHLIVIS NA  | NA |
| 46 | 54  | MGMWHLKDAG NA  | NA |
| 35 | 58  | MGMWHLIQAY NA  | NA |
| 9  | 15  | YDTQHLQRAH NA  | NA |
| 65 | 81  | GWWMNLKYKR NA  | NA |

|     |     |               |    |
|-----|-----|---------------|----|
| 57  | 50  | GWWMNLQKQG NA | NA |
| 50  | 52  | GWWMNLQSGT NA | NA |
| 44  | 58  | GWWMNLQGKG NA | NA |
| 45  | 61  | GWWMNLQQWH NA | NA |
| 55  | 60  | RQLAHIIGQK NA | NA |
| 115 | 113 | RQLAHIVRQW NA | NA |
| 40  | 35  | KMVYMLLASV NA | NA |
| 42  | 54  | KMVYMLYGRG NA | NA |
| 53  | 78  | KMVYMLLRLS NA | NA |
| 42  | 49  | KMVYMLYSLG NA | NA |
| 34  | 48  | GYGWALKKVV NA | NA |
| 36  | 43  | NYGWALKKVS NA | NA |
| 96  | 115 | IRGANLKLHF NA | NA |
| 32  | 34  | YRGANLKNGG NA | NA |
| 25  | 28  | TRGANLKGSY NA | NA |
| 25  | 46  | FRGANLKGSK NA | NA |
| 19  | 18  | LRGANLKNNG NA | NA |
| 51  | 61  | GRGANLKDNQ NA | NA |
| 15  | 18  | PRGANLKGWW NA | NA |
| 39  | 41  | ERGANLKGKH NA | NA |
| 8   | 4   | PRGANLKVWF NA | NA |
| 38  | 45  | QRGANLKLLG NA | NA |
| 36  | 43  | NTPNWLQDVY NA | NA |
| 36  | 35  | NTPNWLVNAV NA | NA |
| 53  | 58  | DEPNYLKLNI NA | NA |
| 31  | 36  | SEPNYLKVSA NA | NA |
| 38  | 40  | VEPNYLKDSH NA | NA |
| 66  | 83  | HEPNYLKVQR NA | NA |
| 105 | 128 | CEPNYLKLHA NA | NA |
| 32  | 48  | PEPNYLKSLF NA | NA |
| 43  | 50  | MEPNYLKDWL NA | NA |
| 65  | 62  | NEPNYLKKVF NA | NA |
| 22  | 33  | NEPNYLKRPK NA | NA |
| 48  | 46  | DEPNYLKKMW NA | NA |
| 60  | 55  | AEPNYLKQEL NA | NA |
| 53  | 59  | VLWAGLYVMR NA | NA |
| 28  | 31  | VMYGNLVSAY NA | NA |
| 93  | 98  | YLVRYLYQRL NA | NA |
| 47  | 33  | YLVRYLYVKL NA | NA |
| 85  | 77  | YLVRYLLGHW NA | NA |
| 22  | 33  | YLVRYLQGMK NA | NA |

|     |     |                |    |
|-----|-----|----------------|----|
| 19  | 26  | YLVRYLQVGY NA  | NA |
| 39  | 59  | YLVRYLIGWT NA  | NA |
| 197 | 243 | YLVRYLKNVH NA  | NA |
| 76  | 82  | RDLSHLYQGG NA  | NA |
| 182 | 234 | NVLYHLQMVQ NA  | NA |
| 89  | 103 | NVLYHLQKHG NA  | NA |
| 99  | 123 | WVLYHLQGVQ NA  | NA |
| 62  | 61  | IVLYHLQGTT NA  | NA |
| 50  | 67  | KVLYHLQMGGA NA | NA |
| 3   | 4   | FVLYHLQRPS NA  | NA |
| 80  | 78  | QVLYHLQMAV NA  | NA |
| 6   | 12  | TVLYHLQRVI NA  | NA |
| 105 | 145 | TVLYHLQLPG NA  | NA |
| 36  | 35  | GVLYHLQSSI NA  | NA |
| 126 | 139 | PVLYHLQDGW NA  | NA |
| 91  | 108 | QSWYGMVRKL NA  | NA |
| 59  | 104 | RNGLALKLTG NA  | NA |
| 94  | 104 | RNGLALKSEV NA  | NA |
| 41  | 42  | RNGLALAREY NA  | NA |
| 39  | 77  | RNGLALVGNQ NA  | NA |
| 8   | 11  | ISWLNLQGVS NA  | NA |
| 21  | 24  | ISWLNLQAQI NA  | NA |
| 28  | 50  | ISWLNLGIG NA   | NA |
| 9   | 22  | ISWLNLKDMG NA  | NA |
| 31  | 42  | ISWLNLQNPW NA  | NA |
| 44  | 63  | ISWLNLYGQG NA  | NA |
| 65  | 70  | ATIAHLYVPS NA  | NA |
| 45  | 49  | GNVANLQKMH NA  | NA |
| 48  | 63  | ANYSNILGKQ NA  | NA |
| 47  | 56  | ANYSNIKVTI NA  | NA |
| 28  | 34  | ANYSNIIASA NA  | NA |
| 33  | 51  | ANYSNIANLI NA  | NA |
| 49  | 45  | ANYSNILLKL NA  | NA |
| 32  | 39  | HIWQNLQYPT NA  | NA |
| 46  | 64  | HIWQNLLALG NA  | NA |
| 41  | 57  | HIWQNLYYVY NA  | NA |
| 51  | 49  | HIWQNLVNLT NA  | NA |
| 56  | 43  | HIWQNLQKTW NA  | NA |
| 31  | 25  | TVLNSLIVQG NA  | NA |
| 24  | 33  | TVLNSLKNTG NA  | NA |
| 46  | 57  | DSLAWLYLGG NA  | NA |



|     |     |               |    |
|-----|-----|---------------|----|
| 55  | 53  | DSLAWLQVGQ NA | NA |
| 68  | 87  | LWYGHLVDVA NA | NA |
| 19  | 32  | RLYMNIQSSR NA | NA |
| 48  | 82  | QHWGGLQGIG NA | NA |
| 69  | 77  | QHWGGLYNGS NA | NA |
| 53  | 72  | QHWGGLVDEA NA | NA |
| 122 | 147 | QHWGGLVLRV NA | NA |
| 117 | 182 | QHWGGLVYRT NA | NA |
| 18  | 28  | RQVRYLQKVT NA | NA |
| 64  | 60  | RQVRYLLANK NA | NA |
| 57  | 71  | RQVRYLILIR NA | NA |
| 43  | 54  | RQVRYLVGKG NA | NA |
| 60  | 54  | VRLNYLASKV NA | NA |
| 88  | 107 | VRLNYLAGRL NA | NA |
| 44  | 55  | VRLNYLKYEF NA | NA |
| 56  | 53  | VRLNYLYQLV NA | NA |
| 35  | 58  | VRLNYLKGGI NA | NA |
| 47  | 55  | VRLNYLAMAT NA | NA |
| 28  | 37  | TKWLALILNG NA | NA |
| 107 | 128 | TKWLALALRH NA | NA |
| 50  | 89  | TKWLALQSKH NA | NA |
| 53  | 76  | TKWLALVRGH NA | NA |
| 77  | 97  | TKWLALINPV NA | NA |
| 33  | 28  | TKWLALKGSG NA | NA |
| 37  | 48  | ENFLHLVNVG NA | NA |
| 50  | 35  | HNANYLYLPR NA | NA |
| 43  | 49  | LVGNSLMRLY NA | NA |
| 69  | 61  | LVGNSLRLHS NA | NA |
| 5   | 4   | LVGNSLILHT NA | NA |
| 17  | 20  | LVGNSLKSGS NA | NA |
| 21  | 24  | LVGNSLMSNG NA | NA |
| 17  | 17  | LVGNSLMKTG NA | NA |
| 44  | 53  | VMVWNIYKSF NA | NA |
| 44  | 48  | VMVWNIYKGQ NA | NA |
| 21  | 26  | TMGMNMYGMG NA | NA |
| 53  | 62  | TMGMNMIYNY NA | NA |
| 29  | 27  | YNWRHLVSLQ NA | NA |
| 119 | 119 | YNWRHLVYEG NA | NA |
| 94  | 132 | NMWAHLYRIG NA | NA |
| 185 | 218 | NMWAHLYQQH NA | NA |
| 50  | 78  | NMWAHLVKLW NA | NA |

|     |                   |    |
|-----|-------------------|----|
| 9   | 10 WRYSNLVKKT NA  | NA |
| 10  | 17 WRYSNLVDMS NA  | NA |
| 40  | 70 WRYSNLVGHA NA  | NA |
| 43  | 34 MAGRHLIKVV NA  | NA |
| 30  | 41 GSVMNLYKES NA  | NA |
| 73  | 76 RGPYHLVAKY NA  | NA |
| 33  | 44 IPLLNLRNG NA   | NA |
| 17  | 14 IPLLNLRVH NA   | NA |
| 24  | 30 IPLLNLIAEG NA  | NA |
| 64  | 66 SKMFHLIGAS NA  | NA |
| 51  | 63 DKMFHLIGHS NA  | NA |
| 58  | 84 SKMFHLIVWT NA  | NA |
| 73  | 99 AKMFHLIKGA NA  | NA |
| 87  | 79 SKMFHLIKRY NA  | NA |
| 106 | 116 CKMFHLIRVI NA | NA |
| 56  | 66 AKMFHLIQGH NA  | NA |
| 206 | 268 NKMFHLIKRW NA | NA |
| 76  | 85 MKMFHLIRLY NA  | NA |
| 94  | 128 FKMFLIMEA NA  | NA |
| 46  | 62 FKMFLIKNR NA   | NA |
| 31  | 49 GLGLNLKSAI NA  | NA |
| 91  | 88 GLGLNLYGQG NA  | NA |
| 43  | 49 GLGLNLQNMH NA  | NA |
| 1   | 1 GLGLNLASAS NA   | NA |
| 72  | 115 DSVLGLIGRH NA | NA |
| 31  | 31 DRVLGLIGSS NA  | NA |
| 27  | 51 SAVLGLIGPL NA  | NA |
| 34  | 35 PSVLGLIGRI NA  | NA |
| 27  | 34 NNVLGLIGLH NA  | NA |
| 36  | 32 HKVLGLIGKT NA  | NA |
| 47  | 45 MMVLGLIGEA NA  | NA |
| 37  | 55 HNVLGLIGGA NA  | NA |
| 58  | 63 TQVLGLIGPV NA  | NA |
| 59  | 41 SKVLGLIGPF NA  | NA |
| 65  | 62 AGVRYLKYIK NA  | NA |
| 50  | 50 AGVRYLLDGT NA  | NA |
| 44  | 37 AGVRYLIVMW NA  | NA |
| 41  | 58 AGVRYLAMIF NA  | NA |
| 72  | 73 GMAQYLYVGK NA  | NA |
| 11  | 13 GMAQYLQRQK NA  | NA |
| 57  | 74 GMAQYLYMRK NA  | NA |

|     |                   |    |
|-----|-------------------|----|
| 30  | 41 VRVLHLQDAY NA  | NA |
| 53  | 77 VRVLHLYDVL NA  | NA |
| 73  | 99 SIVRMLYLKL NA  | NA |
| 30  | 56 CRVWGIYVPG NA  | NA |
| 47  | 47 CPVWGIYVSA NA  | NA |
| 23  | 34 YAVWGIYVQG NA  | NA |
| 26  | 35 WNVWGIYVLQ NA  | NA |
| 39  | 42 DKVWGIYVQI NA  | NA |
| 34  | 47 IKVWGIYVET NA  | NA |
| 123 | 123 GTVWGIYVHW NA | NA |
| 41  | 53 EPVWGIYVML NA  | NA |
| 36  | 60 AYVWGIYVTY NA  | NA |
| 26  | 42 EQQMSLRQVY NA  | NA |
| 63  | 75 GQQMSLRMQQ NA  | NA |
| 60  | 105 RQQMSLRDQA NA | NA |
| 61  | 61 AQQMSLRAMG NA  | NA |
| 41  | 81 KQQMSLRDQI NA  | NA |
| 130 | 168 YQQMSLRLGG NA | NA |
| 46  | 46 EQQMSLRLWF NA  | NA |
| 34  | 42 GQQMSLRKNH NA  | NA |
| 48  | 57 GQQMSLRGVG NA  | NA |
| 69  | 101 DQQMSLRGHQ NA | NA |
| 33  | 43 TGVSWLISPS NA  | NA |
| 54  | 60 TGVSWLVVGH NA  | NA |
| 29  | 28 TGVSWLYGPY NA  | NA |
| 31  | 51 TGVSWLVYIQ NA  | NA |
| 42  | 49 TGVSWLASQY NA  | NA |
| 81  | 107 RILGYLYYHT NA | NA |
| 66  | 62 ERGLSLVNLL NA  | NA |
| 39  | 49 RSGRSLVNLL NA  | NA |
| 53  | 81 DPWSSLVLRL NA  | NA |
| 80  | 89 RAWGSLVLRL NA  | NA |
| 66  | 78 VSLAYLYAHT NA  | NA |
| 13  | 22 VSLAYLYQSG NA  | NA |
| 43  | 49 TTGASLQMLV NA  | NA |
| 65  | 69 FHSASLQMLL NA  | NA |
| 32  | 37 IYWASLQMLA NA  | NA |
| 29  | 34 LNGASLQMLK NA  | NA |
| 28  | 33 QIGASLQMLY NA  | NA |
| 37  | 56 VQMYMLKLQP NA  | NA |
| 48  | 46 YYGRMLKLQP NA  | NA |

|    |     |               |    |
|----|-----|---------------|----|
| 36 | 38  | GTSAMLKLOP NA | NA |
| 44 | 71  | MISQSLIYLT NA | NA |
| 10 | 11  | FISQSLINSG NA | NA |
| 29 | 40  | CISQSLIKHH NA | NA |
| 34 | 47  | RISQSLIRVH NA | NA |
| 40 | 55  | AISQSLIDHA NA | NA |
| 62 | 35  | RISQSLIQWW NA | NA |
| 23 | 24  | IISQSLIQPS NA | NA |
| 16 | 17  | YISQSLINKV NA | NA |
| 30 | 25  | TTPSWLQDMW NA | NA |
| 24 | 31  | LQSMNLQYSV NA | NA |
| 26 | 27  | LQSMNLKNGV NA | NA |
| 62 | 94  | LQSMNLRNRH NA | NA |
| 22 | 34  | NRGYSLIALQ NA | NA |
| 31 | 20  | CYFYSLIALT NA | NA |
| 4  | 5   | SFFYSLIALR NA | NA |
| 62 | 87  | RRMYSLIALL NA | NA |
| 28 | 31  | YTWYSLIALH NA | NA |
| 22 | 36  | LPGYSLIALH NA | NA |
| 46 | 41  | GRFYSLIALY NA | NA |
| 19 | 33  | RVTWALQKGT NA | NA |
| 37 | 38  | SHSFSLRTWQ NA | NA |
| 30 | 41  | KAMFSLRTWG NA | NA |
| 67 | 100 | EKSFSLRTWG NA | NA |
| 64 | 73  | HWSWSLILHG NA | NA |
| 39 | 33  | TNSWSLILKL NA | NA |
| 33 | 28  | GISWSLILNV NA | NA |
| 93 | 103 | AMSWSLILSH NA | NA |
| 52 | 62  | GMSWSLILPA NA | NA |
| 34 | 43  | IMSWSLILEA NA | NA |
| 13 | 15  | CISWSLILSY NA | NA |
| 11 | 38  | QSSWSLILMA NA | NA |
| 42 | 43  | PQSWSLILVF NA | NA |
| 17 | 12  | SASWSLILVI NA | NA |
| 93 | 111 | TYWAALQRLP NA | NA |
| 80 | 92  | GTGRALQRLP NA | NA |
| 20 | 25  | TKVLWLQLGW NA | NA |
| 57 | 77  | TKVLWLIGHI NA | NA |
| 83 | 94  | TKVLWLQNHA NA | NA |
| 55 | 55  | GKASNLYRKS NA | NA |
| 83 | 106 | MKASNLYLSV NA | NA |

|     |     |               |    |
|-----|-----|---------------|----|
| 21  | 33  | VKASNLYGGG NA | NA |
| 82  | 83  | CKASNLYNHA NA | NA |
| 17  | 16  | EKASNLYDGY NA | NA |
| 14  | 15  | QKASNLYGGT NA | NA |
| 110 | 140 | CKASNLYARR NA | NA |
| 42  | 50  | RKASNLYAGI NA | NA |
| 40  | 51  | TKASNLYKHH NA | NA |
| 117 | 120 | FSMNSLRLFE NA | NA |
| 56  | 61  | PFGNALQVPT NA | NA |
| 35  | 40  | IMMAYLIYKK NA | NA |
| 61  | 88  | IMMAYLVMKQ NA | NA |
| 22  | 24  | IMMAYLIYQY NA | NA |
| 33  | 52  | IMMAYLRQGA NA | NA |
| 31  | 31  | IMMAYLLYQY NA | NA |
| 38  | 40  | IMMAYLALPW NA | NA |
| 33  | 21  | TALGYLYGVS NA | NA |
| 97  | 108 | PVVWWQKMSW NA | NA |
| 42  | 62  | PVVWWQQKGA NA | NA |
| 42  | 55  | PQGYNLIYWN NA | NA |
| 70  | 83  | LPWANLIYWN NA | NA |
| 55  | 72  | YRSWNLIYWN NA | NA |
| 63  | 81  | LWMANLIYWN NA | NA |
| 58  | 64  | VAMLNLIYWN NA | NA |
| 48  | 45  | EPMANLIYWN NA | NA |
| 25  | 32  | MRWSMLLMKQ NA | NA |
| 63  | 70  | RPGAMLLMKQ NA | NA |
| 40  | 38  | VTVIALYSAW NA | NA |
| 13  | 13  | VTVIALYLLF NA | NA |
| 11  | 15  | ATASFLYSMF NA | NA |
| 98  | 96  | TDWQFLVRSL NA | NA |
| 92  | 85  | HSMYFLVRSL NA | NA |
| 30  | 58  | CHGIALIAND NA | NA |
| 57  | 77  | RNWLALIAND NA | NA |
| 42  | 47  | ITLLDLIGSY NA | NA |
| 34  | 49  | LTLLDLIRWL NA | NA |
| 58  | 75  | RTLLDLIGGW NA | NA |
| 45  | 39  | DTLLDLINAA NA | NA |
| 49  | 65  | ATLLDLIMLG NA | NA |
| 51  | 67  | HTLLDLIYER NA | NA |
| 34  | 41  | TLLDLIDEF NA  | NA |
| 73  | 79  | DTLLDLIQHW NA | NA |

|     |     |               |    |
|-----|-----|---------------|----|
| 105 | 99  | KTLLDLIRNK NA | NA |
| 86  | 69  | GTLLDLIVPL NA | NA |
| 28  | 36  | GTLLDLIDIR NA | NA |
| 41  | 50  | YPWGQLLLRN NA | NA |
| 32  | 44  | EPIYNLRKTA NA | NA |
| 42  | 52  | EPIYNLKVLI NA | NA |
| 20  | 17  | AVTYALQLIW NA | NA |
| 26  | 28  | AVTYALQMNI NA | NA |
| 43  | 45  | AVTYALLYPT NA | NA |
| 48  | 62  | AVTYALRGGL NA | NA |
| 38  | 71  | AVTYALYNGW NA | NA |
| 21  | 38  | AVTYALQREH NA | NA |
| 38  | 39  | AVTYALIKMT NA | NA |
| 65  | 84  | IKVNNLVRAT NA | NA |
| 46  | 49  | RKVNNLVDPG NA | NA |
| 76  | 120 | WKVNNLVYGW NA | NA |
| 123 | 146 | LKVNNLVVNW NA | NA |
| 35  | 45  | RKVNNLVGEG NA | NA |
| 59  | 60  | RKVNNLVMWA NA | NA |
| 32  | 42  | RKVNNLVGKR NA | NA |
| 87  | 97  | EKVNNLVGMQ NA | NA |
| 42  | 48  | GKVNNLVLMG NA | NA |
| 71  | 91  | WKVNNLVMRP NA | NA |
| 31  | 41  | TKVNNLVGAK NA | NA |
| 39  | 39  | SYMFSLQGRV NA | NA |
| 49  | 59  | SYMFSLKMMG NA | NA |
| 27  | 57  | SYMFSLLNIR NA | NA |
| 16  | 16  | SYMFSLQKVT NA | NA |
| 50  | 55  | SYMFSLIMRT NA | NA |
| 0   | 0   | GISMYLQLML NA | NA |
| 32  | 41  | GISMYLIVNR NA | NA |
| 35  | 30  | GISMYLLYAY NA | NA |
| 12  | 24  | GISMYLRKEL NA | NA |
| 31  | 56  | FAAYSLIVAR NA | NA |
| 47  | 39  | RGMQNLKSRG NA | NA |
| 22  | 11  | RGMQNLQAVK NA | NA |
| 17  | 29  | RGMQNLQNTT NA | NA |
| 59  | 53  | RGMQNLQDAW NA | NA |
| 60  | 80  | MIWAKLIVRQ NA | NA |
| 48  | 59  | NAGNFLRKMF NA | NA |
| 13  | 24  | ISWNFLRKMI NA | NA |

|     |     |               |    |
|-----|-----|---------------|----|
| 35  | 29  | LRGNFLRKMR NA | NA |
| 20  | 32  | WFGNFLRKML NA | NA |
| 152 | 146 | DFWNFLRKMH NA | NA |
| 5   | 11  | ELPNFLYSGT NA | NA |
| 75  | 62  | ELPNFLYYHF NA | NA |
| 27  | 17  | ELPNFLYRST NA | NA |
| 129 | 142 | SWGLALYSKW NA | NA |
| 26  | 40  | SWGLALYLWY NA | NA |
| 27  | 33  | SWGLALILVG NA | NA |
| 19  | 31  | SWGLALQLIL NA | NA |
| 78  | 98  | SWGLALVARG NA | NA |
| 62  | 50  | TLTHHLIKGQ NA | NA |
| 35  | 46  | EVSQHLIAMV NA | NA |
| 45  | 60  | EVSQHLMGR NA  | NA |
| 57  | 66  | EVSQHLLRSY NA | NA |
| 42  | 53  | NFAYHLQQRY NA | NA |
| 40  | 46  | IQAYHLQQES NA | NA |
| 14  | 29  | AYAYHLQQSH NA | NA |
| 39  | 41  | ADAYHLQQIV NA | NA |
| 90  | 109 | MKAYHLQQRG NA | NA |
| 113 | 124 | MAAYHLQQGQ NA | NA |
| 132 | 186 | QYAYHLQQAW NA | NA |
| 85  | 95  | MFAYHLQQQS NA | NA |
| 25  | 26  | TMAYHLQQEA NA | NA |
| 83  | 74  | GSAYHLQQVV NA | NA |
| 71  | 78  | RTYSHLVKVV NA | NA |
| 59  | 70  | RTYSHLLAAQ NA | NA |
| 107 | 125 | HLVAWLIDEH NA | NA |
| 28  | 41  | HLVAWLQQGK NA | NA |
| 40  | 40  | HLVAWLQGVV NA | NA |
| 69  | 94  | SLYRALVGKQ NA | NA |
| 36  | 37  | GKTWALYSAR NA | NA |
| 17  | 24  | GKTWALQLIS NA | NA |
| 16  | 24  | SSPLYLQRGG NA | NA |
| 67  | 71  | SVARNLINEK NA | NA |
| 11  | 17  | LVVAALYAPR NA | NA |
| 41  | 49  | YQTMALQYGG NA | NA |
| 85  | 102 | YQTMALQYEQ NA | NA |
| 50  | 57  | RVIRHLVRSR NA | NA |
| 74  | 83  | NFGRPLIARV NA | NA |
| 74  | 92  | NFGRPLLAVL NA | NA |

|     |     |               |    |
|-----|-----|---------------|----|
| 115 | 131 | NFGRPLARGL NA | NA |
| 57  | 60  | NFGRPLKDHV NA | NA |
| 45  | 55  | NFGRPLVGQG NA | NA |
| 61  | 114 | LPTRWLVNRW NA | NA |
| 86  | 92  | LPTRWLYGLL NA | NA |
| 55  | 62  | WVANMIYGLV NA | NA |
| 65  | 67  | WVANMIIGGQ NA | NA |
| 49  | 44  | DRIRHLVQIR NA | NA |
| 55  | 79  | DVAFHLINIL NA | NA |
| 62  | 52  | YRVAFLYGTY NA | NA |
| 56  | 53  | VIVAALYQIK NA | NA |
| 63  | 62  | VIVAALYSIA NA | NA |
| 51  | 66  | IEYLNQAQVS NA | NA |
| 72  | 64  | IEYLNQVNR NA  | NA |
| 17  | 16  | QAAFHLINGF NA | NA |
| 40  | 62  | QAAFHLVRRS NA | NA |
| 26  | 26  | GMVLNLQMLA NA | NA |
| 70  | 74  | GMVLNLIKSQ NA | NA |
| 60  | 86  | GMVLNLYGLF NA | NA |
| 34  | 32  | GMVLNLYLGV NA | NA |
| 42  | 40  | GMVLNLINEA NA | NA |
| 49  | 54  | SIPNALYVEG NA | NA |
| 44  | 58  | SIPNALYDGV NA | NA |
| 7   | 20  | IFINFLYRQ NA  | NA |
| 30  | 25  | IFINFLIGKI NA | NA |
| 35  | 53  | NKTAWLTAAG NA | NA |
| 302 | 425 | NKTAWLTMRW NA | NA |
| 35  | 49  | NKTAWLQNWY NA | NA |
| 201 | 202 | NKTAWLLVGS NA | NA |
| 82  | 75  | NKTAWLIVLK NA | NA |
| 108 | 126 | NKTAWLYNGY NA | NA |
| 105 | 131 | NKTAWLTRTY NA | NA |
| 243 | 313 | NKTAWLWLRW NA | NA |
| 52  | 74  | VWGRALYLWI NA | NA |
| 59  | 72  | VWGRALQNIR NA | NA |
| 45  | 48  | VWGRALYKES NA | NA |
| 64  | 81  | VWGRALLNKK NA | NA |
| 63  | 76  | VWGRALYGEI NA | NA |
| 23  | 37  | RDVLWLIMGG NA | NA |
| 25  | 35  | RDVLWLVKMR NA | NA |
| 30  | 39  | RDVLWLYYWF NA | NA |



|     |     |                |    |
|-----|-----|----------------|----|
| 16  | 29  | RDVLWLQGLT NA  | NA |
| 90  | 107 | VTPLYLQLAW NA  | NA |
| 46  | 71  | VTPLYLQKVQ NA  | NA |
| 61  | 64  | RRTAWLTRGK NA  | NA |
| 85  | 99  | VDILHLYNAV NA  | NA |
| 59  | 75  | VDILHLYGAT NA  | NA |
| 58  | 47  | VDILHLIGEG NA  | NA |
| 55  | 62  | IQLAWLYQIK NA  | NA |
| 100 | 122 | IQLAWLYGHH NA  | NA |
| 56  | 74  | PMARYLIGPL NA  | NA |
| 68  | 64  | PMARYLVNWR NA  | NA |
| 58  | 59  | PMARYLVKMH NA  | NA |
| 9   | 8   | PMARYLQSSK NA  | NA |
| 46  | 57  | QQGAWLKKIF NA  | NA |
| 30  | 31  | EHMAWLKKII NA  | NA |
| 51  | 51  | HMAWLKKIF NA   | NA |
| 52  | 90  | KSSAWLKKIA NA  | NA |
| 12  | 17  | SRVRNLQQRV NA  | NA |
| 82  | 97  | SDIRWLYAGQ NA  | NA |
| 73  | 73  | SDIRWLYLMI NA  | NA |
| 18  | 29  | EVTMWLYVIY NA  | NA |
| 78  | 79  | EVTMWLVAGI NA  | NA |
| 43  | 51  | EVTMWLIRTA NA  | NA |
| 273 | 392 | NHSQGLRMGG NA  | NA |
| 10  | 10  | VKAQHLLILKG NA | NA |
| 28  | 28  | VKAQHLIVAV NA  | NA |
| 30  | 28  | VKAQHLLIGST NA | NA |
| 17  | 28  | DLAYSLQVML NA  | NA |
| 29  | 58  | HLAYSLQMVH NA  | NA |
| 40  | 30  | WLAYSLQLGS NA  | NA |
| 14  | 15  | RLAYSLQVIF NA  | NA |
| 40  | 59  | RLAYSLQLPR NA  | NA |
| 65  | 66  | CLAYSLQDGW NA  | NA |
| 13  | 25  | FLAYSLQRNQ NA  | NA |
| 55  | 66  | CLAYSLQLGQ NA  | NA |
| 81  | 80  | WLAYSLQGWT NA  | NA |
| 6   | 3   | HLFQWLILLV NA  | NA |
| 59  | 92  | CCSLALLGGY NA  | NA |
| 129 | 135 | FKWLALKMGQ NA  | NA |
| 100 | 117 | LTMLALKMGT NA  | NA |
| 125 | 180 | CPSLALKMGT NA  | NA |

|     |     |             |    |    |
|-----|-----|-------------|----|----|
| 76  | 103 | EDWLALKMGV  | NA | NA |
| 94  | 122 | AQSLALKMGW  | NA | NA |
| 6   | 13  | VNVRNLQQPY  | NA | NA |
| 30  | 22  | VNVRNLQKKK  | NA | NA |
| 47  | 63  | VNVRNLQMLH  | NA | NA |
| 48  | 55  | LGWSSLRNT   | NA | NA |
| 17  | 21  | LGWSSLQALF  | NA | NA |
| 76  | 83  | LGWSSLFAEW  | NA | NA |
| 33  | 35  | LGWSSLVLSI  | NA | NA |
| 43  | 34  | LGWSSL SVS  | NA | NA |
| 60  | 51  | NTFLHLIMGF  | NA | NA |
| 51  | 84  | SLPAHIYDIV  | NA | NA |
| 73  | 105 | WLYAHYLGMS  | NA | NA |
| 24  | 19  | WLYAHYLQAY  | NA | NA |
| 106 | 102 | WLYAHYIRNT  | NA | NA |
| 58  | 63  | ERLLHLIMAT  | NA | NA |
| 151 | 213 | ERLLHLQRRR  | NA | NA |
| 48  | 52  | MDLLSLYVAY  | NA | NA |
| 63  | 72  | TTALWLIRWK  | NA | NA |
| 30  | 45  | NDLAHIQDQT  | NA | NA |
| 51  | 64  | NDLAHIVVGV  | NA | NA |
| 48  | 51  | NDLAHIVQVG  | NA | NA |
| 46  | 37  | NDLAHIIDRL  | NA | NA |
| 29  | 45  | NDLAHIYDKG  | NA | NA |
| 71  | 66  | YTMLHLAGKL  | NA | NA |
| 105 | 113 | YTMLHLYDQA  | NA | NA |
| 106 | 144 | YTMLHLRGHG  | NA | NA |
| 27  | 22  | YTMLHLAVWV  | NA | NA |
| 70  | 94  | SRVLPLYNHY  | NA | NA |
| 86  | 81  | SRVLPLYLMF  | NA | NA |
| 37  | 50  | FMYSHLIKII  | NA | NA |
| 102 | 134 | FMYSHLLNHI  | NA | NA |
| 98  | 131 | CQWLNLRSGK  | NA | NA |
| 93  | 100 | MHWLNLRSER  | NA | NA |
| 47  | 54  | FSWLNLRSTY  | NA | NA |
| 56  | 76  | HRWLNLR SNA | NA | NA |
| 48  | 76  | VHWLNLRSLT  | NA | NA |
| 52  | 55  | RRWLNLR SWF | NA | NA |
| 47  | 46  | ENWLNLRSES  | NA | NA |
| 55  | 72  | WNWLNLR SIG | NA | NA |
| 46  | 59  | RIWLNLRSSK  | NA | NA |

|     |     |            |    |    |
|-----|-----|------------|----|----|
| 32  | 60  | DYWLNLRSWQ | NA | NA |
| 70  | 63  | HKWLNLRSTY | NA | NA |
| 30  | 35  | DAPYFLQDGK | NA | NA |
| 117 | 136 | YNVNYLYRQH | NA | NA |
| 82  | 100 | YNVNYLRSHQ | NA | NA |
| 85  | 93  | RHMLGLYVPS | NA | NA |
| 89  | 102 | RHMLGLIVLR | NA | NA |
| 51  | 62  | GPGNNLTFLA | NA | NA |
| 61  | 67  | HSGIALREKV | NA | NA |
| 32  | 39  | QRVLPLYMIH | NA | NA |
| 43  | 81  | EAVGNLYARY | NA | NA |
| 36  | 42  | EAVGNLYLMH | NA | NA |
| 72  | 73  | YYASHLYALA | NA | NA |
| 73  | 108 | YYASHLLGQH | NA | NA |
| 105 | 119 | YYASHLLYAI | NA | NA |
| 27  | 48  | EMYSDLKSKF | NA | NA |
| 21  | 39  | SDGSDLKSKG | NA | NA |
| 44  | 65  | CKGSDLKSKV | NA | NA |
| 57  | 62  | MAGANLVRVR | NA | NA |
| 56  | 76  | VMGRNLVRVR | NA | NA |
| 109 | 108 | LNyrnlvrvr | NA | NA |
| 22  | 39  | MAGLNLVRVR | NA | NA |
| 32  | 29  | PSPRYLYSMK | NA | NA |
| 24  | 19  | QKVMYLQVAG | NA | NA |
| 19  | 17  | LQVMYLQVIY | NA | NA |
| 26  | 55  | YSVMYLQVVY | NA | NA |
| 23  | 22  | WIVMYLQVnk | NA | NA |
| 18  | 39  | FSVMYLQVGI | NA | NA |
| 16  | 15  | LFVMYLQVRR | NA | NA |
| 17  | 18  | CSVMYLQVIG | NA | NA |
| 20  | 8   | MYVMYLQVIF | NA | NA |
| 43  | 50  | RHVMYLQVMH | NA | NA |
| 35  | 52  | DAVMYLQVTK | NA | NA |
| 40  | 52  | DHWWDLKRSY | NA | NA |
| 39  | 53  | TPWWDLKRSY | NA | NA |
| 35  | 39  | DPANYIRAGA | NA | NA |
| 42  | 54  | NQANYIRARG | NA | NA |
| 42  | 44  | DFANYIRAKG | NA | NA |
| 19  | 24  | EMANYIRANG | NA | NA |
| 61  | 80  | KNANYIRAHH | NA | NA |
| 90  | 105 | HIANYIRAHI | NA | NA |

|     |                   |    |
|-----|-------------------|----|
| 54  | 54 PNANYIRATL NA  | NA |
| 42  | 44 NDANYIRANA NA  | NA |
| 27  | 30 IAANYIRAGH NA  | NA |
| 25  | 40 RRANYIRAAG NA  | NA |
| 32  | 65 PHYLFLVAKA NA  | NA |
| 59  | 81 CNGFALVAKG NA  | NA |
| 28  | 42 PFWFALVAKG NA  | NA |
| 42  | 59 GDWFALVAKH NA  | NA |
| 31  | 42 RHGFALVAKA NA  | NA |
| 66  | 64 VYSAYLLGGY NA  | NA |
| 24  | 40 VYSAYLLGLS NA  | NA |
| 79  | 109 VYSAYLARSL NA | NA |
| 16  | 18 VYSAYLLMVF NA  | NA |
| 53  | 64 VYSAYLRYVT NA  | NA |
| 26  | 35 VYSAYLAVTI NA  | NA |
| 39  | 45 PQWYQLFNVG NA  | NA |
| 62  | 90 GQPNFLYAVW NA  | NA |
| 84  | 85 GQPNFLYRTQ NA  | NA |
| 92  | 106 IKWNSLKRRH NA | NA |
| 338 | 424 NQGNSLKRRW NA | NA |
| 93  | 105 GFMNSLKRRQ NA | NA |
| 57  | 70 TTSASLRVGT NA  | NA |
| 34  | 38 TTSASLIVHY NA  | NA |
| 22  | 41 TTSASLILGY NA  | NA |
| 19  | 14 TTSASLISHI NA  | NA |
| 33  | 37 TTSASLQVWV NA  | NA |
| 18  | 23 WNSLNLKLSR NA  | NA |
| 21  | 25 WNSLNLIAQI NA  | NA |
| 36  | 34 WNSLNLAGTI NA  | NA |
| 20  | 41 WNSLNLAGGG NA  | NA |
| 25  | 46 WNSLNLKNTH NA  | NA |
| 53  | 46 WNSLNLRVNG NA  | NA |
| 229 | 303 TKGASLNQRL NA | NA |
| 73  | 101 QWWFSLNQRL NA | NA |
| 56  | 61 RAGFQLQRLF NA  | NA |
| 22  | 39 TVSLPLRQQR NA  | NA |
| 19  | 32 TVSLPLIMKG NA  | NA |
| 41  | 59 TVSLPLIKKL NA  | NA |
| 118 | 120 KYHAWMWYVI NA | NA |
| 263 | 311 KYHAWMMGPW NA | NA |
| 34  | 40 VLF GALQAAS NA | NA |

|    |     |            |    |    |
|----|-----|------------|----|----|
| 78 | 83  | VLFGALYYRQ | NA | NA |
| 28 | 38  | VLFGALMNTS | NA | NA |
| 16 | 13  | VFPQGMQMVF | NA | NA |
| 39 | 47  | VFPQGMKQK  | NA | NA |
| 18 | 9   | VFPQGYLMH  | NA | NA |
| 29 | 38  | VFPQGMNRT  | NA | NA |
| 27 | 34  | ATLAAWQASG | NA | NA |
| 74 | 96  | ATLAAWHAPL | NA | NA |
| 44 | 58  | LAPRYWYNRV | NA | NA |
| 48 | 51  | LAPRYWYGNQ | NA | NA |
| 39 | 62  | LAPRYWQYGS | NA | NA |
| 54 | 70  | LAPRYWWDKL | NA | NA |
| 43 | 59  | LAPRYWWGGS | NA | NA |
| 84 | 92  | PFPSGWTAIW | NA | NA |
| 23 | 30  | DFPSGWTAPG | NA | NA |
| 38 | 40  | TFPSGWTATV | NA | NA |
| 89 | 105 | YRPSGWTAQY | NA | NA |
| 86 | 105 | HYPGWTAVF  | NA | NA |
| 28 | 47  | MSPGWTAMR  | NA | NA |
| 35 | 53  | PNPSGWTAAA | NA | NA |
| 89 | 104 | MWPSGWTASY | NA | NA |
| 28 | 42  | TPPSGWTAPV | NA | NA |
| 18 | 32  | MAPSGWTASS | NA | NA |
| 69 | 88  | YFSGWTAWH  | NA | NA |
| 25 | 27  | KSISNWQKSS | NA | NA |
| 42 | 44  | MGLANLQNGQ | NA | NA |
| 33 | 41  | MGLANLQNAW | NA | NA |
| 64 | 77  | MGLANLWQTR | NA | NA |
| 46 | 65  | MGLANLMQWG | NA | NA |
| 77 | 101 | MGLANLMQMW | NA | NA |
| 98 | 112 | RKLAFLWDSQ | NA | NA |
| 58 | 57  | RKLAFLWSWY | NA | NA |
| 9  | 6   | TVLGNLWLLQ | NA | NA |
| 75 | 84  | TVLGNLWSHK | NA | NA |
| 40 | 38  | GRASNLRGGY | NA | NA |
| 55 | 49  | RRASNLRGPS | NA | NA |
| 17 | 21  | GPASNLRGLQ | NA | NA |
| 34 | 48  | ESASNLRGVG | NA | NA |
| 56 | 82  | HRASNLRGRG | NA | NA |
| 54 | 81  | HQASNLRGTW | NA | NA |
| 65 | 71  | TRASNLRGHR | NA | NA |

|    |                   |    |
|----|-------------------|----|
| 69 | 77 IKASNLRGHA NA  | NA |
| 32 | 49 MALSSLWGVG NA  | NA |
| 42 | 59 RVVANLWGAG NA  | NA |
| 30 | 50 RVVANLWLGT NA  | NA |
| 21 | 20 SSVSNLMYWV NA  | NA |
| 11 | 15 SSVSNLWRTH NA  | NA |
| 8  | 13 SSVSNLMSRK NA  | NA |
| 17 | 20 SSVSNLRMEG NA  | NA |
| 26 | 42 SSVSNLMMNL NA  | NA |
| 32 | 44 SSVSNLWDEW NA  | NA |
| 16 | 27 FYFSNLTGPF NA  | NA |
| 34 | 55 FYFSNLSMSI NA  | NA |
| 55 | 84 FYFSNLMGQS NA  | NA |
| 27 | 44 FYFSNLYLQK NA  | NA |
| 31 | 39 FYFSNLQGMY NA  | NA |
| 87 | 103 FYFSNLWKIK NA | NA |
| 64 | 67 FYFSNLKQEV NA  | NA |
| 28 | 41 FYFSNLMGHL NA  | NA |
| 45 | 70 FYFSNLASEK NA  | NA |
| 76 | 89 FYFSNLSVEK NA  | NA |
| 35 | 42 TPPSSLQGVI NA  | NA |
| 68 | 82 DFHWNLTVKT NA  | NA |
| 37 | 37 HKGANLTVKT NA  | NA |
| 43 | 64 GRHGNLTVKT NA  | NA |
| 40 | 63 AWWNNLTVKT NA  | NA |
| 33 | 49 GYFANLIDKY NA  | NA |
| 53 | 47 GYFANLKQKH NA  | NA |
| 44 | 47 GYFANLKS VF NA | NA |
| 38 | 75 GYFANLMRHH NA  | NA |
| 27 | 26 GYFANLMGPG NA  | NA |
| 58 | 96 GYFANLYGRG NA  | NA |
| 51 | 77 GYFANLKAWI NA  | NA |
| 60 | 60 GYFANLTSHG NA  | NA |
| 32 | 22 NPPSHLTVVI NA  | NA |
| 45 | 56 NPPSHLQMTA NA  | NA |
| 54 | 66 NPPSHLWQPW NA  | NA |
| 21 | 20 KAPAHLTVGK NA  | NA |
| 20 | 17 KAPAHLYLIY NA  | NA |
| 8  | 12 KAPAHLTRQR NA  | NA |
| 68 | 60 RLVNWMTRKH NA  | NA |
| 83 | 90 RLVNWMKKNK NA  | NA |

|     |     |            |    |    |
|-----|-----|------------|----|----|
| 70  | 93  | HLVWNLWGVR | NA | NA |
| 35  | 54  | RLVWNLWNLA | NA | NA |
| 67  | 64  | KLWVNLWGSA | NA | NA |
| 29  | 18  | YLVWNLWYGV | NA | NA |
| 39  | 31  | PLVWNLWGQS | NA | NA |
| 40  | 58  | ALVWNLWDSY | NA | NA |
| 32  | 44  | ALVWNLWDQG | NA | NA |
| 26  | 23  | YLVWNLWMVR | NA | NA |
| 61  | 61  | HLVWNLWGEV | NA | NA |
| 54  | 60  | HLVWNLWQGI | NA | NA |
| 37  | 42  | NLVWNLWDTF | NA | NA |
| 44  | 58  | SCVRMMSSEQ | NA | NA |
| 57  | 34  | SCVRMMSKML | NA | NA |
| 24  | 23  | SCVRMMKSAG | NA | NA |
| 65  | 60  | SCVRMMRQPR | NA | NA |
| 32  | 36  | SCVRMMINIL | NA | NA |
| 47  | 71  | SCVRMMTQWY | NA | NA |
| 70  | 93  | HTVYWMMRGS | NA | NA |
| 46  | 69  | HTVYWMMGSK | NA | NA |
| 102 | 140 | HTVYWMSGAQ | NA | NA |
| 94  | 96  | HTVYWMMQNK | NA | NA |
| 8   | 16  | IGVRQLKKNK | NA | NA |
| 47  | 74  | MGPWGMKYPL | NA | NA |
| 33  | 52  | MGPWGMQMIA | NA | NA |
| 67  | 63  | MGPWGMQQQV | NA | NA |
| 87  | 77  | MGPWGMQVAW | NA | NA |
| 193 | 202 | IMHRALTLHI | NA | NA |
| 57  | 67  | QIPYSWQVEW | NA | NA |
| 17  | 27  | EDPYSWQVGT | NA | NA |
| 63  | 77  | MDPYSWQVGQ | NA | NA |
| 37  | 57  | FNPYSWQVTK | NA | NA |
| 41  | 47  | TFPYSWQVTQ | NA | NA |
| 53  | 66  | SWPYSWQVPG | NA | NA |
| 52  | 75  | QWPYSWQVKW | NA | NA |
| 50  | 38  | PPYSWQVSA  | NA | NA |
| 25  | 27  | YDPYSWQVIA | NA | NA |
| 37  | 38  | NTPYSWQVGL | NA | NA |
| 13  | 13  | RTPYSWQVSY | NA | NA |
| 51  | 46  | WHVWNLMSSL | NA | NA |
| 63  | 87  | KHVWNLMSMG | NA | NA |
| 78  | 72  | QDVWNLMSTF | NA | NA |

|     |     |                |    |
|-----|-----|----------------|----|
| 58  | 65  | TNVWNLMSSES NA | NA |
| 66  | 106 | NTVWNLMSVQ NA  | NA |
| 63  | 65  | DMVWNLMSSEL NA | NA |
| 85  | 122 | MSVWNLMSNA NA  | NA |
| 51  | 63  | RTVWNLMSGV NA  | NA |
| 58  | 79  | ITVWNLMSIA NA  | NA |
| 64  | 89  | KHVWNLMSNG NA  | NA |
| 91  | 117 | WDVWNLMSER NA  | NA |
| 36  | 38  | WQVRYLMNIG NA  | NA |
| 102 | 99  | WQVRYLTQGI NA  | NA |
| 66  | 74  | WQVRYLTVTG NA  | NA |
| 81  | 90  | WQVRYLTMSH NA  | NA |
| 41  | 49  | WQVRYLMLEF NA  | NA |
| 49  | 69  | WQVRYLTNGR NA  | NA |
| 27  | 62  | QRWFALKRPQ NA  | NA |
| 58  | 42  | QRWFALWGIA NA  | NA |
| 29  | 29  | QRWFALMMY NA   | NA |
| 50  | 53  | QRWFALTGGT NA  | NA |
| 40  | 51  | QRWFALFRNL NA  | NA |
| 53  | 77  | QRWFALTNQH NA  | NA |
| 69  | 66  | KYFRGLWSEL NA  | NA |
| 60  | 52  | TNFRGLWSEL NA  | NA |
| 103 | 150 | VQPRSWTNAA NA  | NA |
| 265 | 334 | YHPRSWTNLW NA  | NA |
| 79  | 93  | HMPRSWTNRR NA  | NA |
| 68  | 94  | GMPRSWTNHA NA  | NA |
| 171 | 209 | YHPRSWTNWH NA  | NA |
| 32  | 43  | GHPRSWTNSY NA  | NA |
| 90  | 131 | MFPRSWTNEW NA  | NA |
| 25  | 36  | WDPRSWTNKI NA  | NA |
| 83  | 91  | MQPRSWTNRA NA  | NA |
| 66  | 93  | ISPRSWTNAG NA  | NA |
| 44  | 54  | ESPRSWTNRQ NA  | NA |
| 61  | 77  | RHFRAMYGTY NA  | NA |
| 68  | 69  | AQHRAMYGTW NA  | NA |
| 53  | 47  | ENFRAMYGTG NA  | NA |
| 77  | 100 | KQPRSWRGQG NA  | NA |
| 118 | 162 | QQPRSWRLLS NA  | NA |
| 50  | 61  | GQPRSWRMAT NA  | NA |
| 162 | 180 | EQPRSWRRPQ NA  | NA |
| 28  | 46  | EQPRSWRNRK NA  | NA |



|     |     |               |    |
|-----|-----|---------------|----|
| 82  | 129 | HQPRSWRRGV NA | NA |
| 221 | 273 | KQPRSWRLWS NA | NA |
| 74  | 129 | VQPRSWRKMV NA | NA |
| 84  | 117 | VQPRSWRGPS NA | NA |
| 31  | 35  | QSPRMLQDER NA | NA |
| 71  | 81  | LVGRALTNML NA | NA |
| 32  | 37  | VMLRFLMNLK NA | NA |
| 34  | 58  | VMLRFLMQRK NA | NA |
| 31  | 25  | ATPESLKSIA NA | NA |
| 8   | 6   | ATPESLYAPG NA | NA |
| 58  | 68  | KLGRALTLVY NA | NA |
| 64  | 74  | QGPWHIQRNF NA | NA |
| 51  | 46  | SQPIHMKMET NA | NA |
| 38  | 32  | SQPIHMTGMG NA | NA |
| 48  | 57  | SQPIHMSRAY NA | NA |
| 60  | 69  | HRHAHLILLW NA | NA |
| 90  | 155 | HRHAHLWLPV NA | NA |
| 54  | 69  | HRHAHLILLV NA | NA |
| 22  | 33  | ESFAALQGSH NA | NA |
| 33  | 41  | ESFAALQGQS NA | NA |
| 47  | 60  | ESFAALANWL NA | NA |
| 84  | 136 | ESFAALRLWR NA | NA |
| 67  | 71  | ESFAALWAWL NA | NA |
| 20  | 25  | ESFAALASAS NA | NA |
| 99  | 111 | AVANSLWMNW NA | NA |
| 120 | 109 | VLWRALKAEV NA | NA |
| 101 | 144 | VLWRALKRLI NA | NA |
| 43  | 60  | KTWRNLTYSF NA | NA |
| 136 | 166 | KTWRNLMYPL NA | NA |
| 36  | 52  | KTWRNLTDEG NA | NA |
| 198 | 201 | HRWSALTGLV NA | NA |
| 26  | 33  | ERFSHLIATR NA | NA |
| 78  | 80  | ERFSHLWLGR NA | NA |
| 32  | 48  | ERFSHLARMS NA | NA |
| 24  | 36  | ERFSHLIKLH NA | NA |
| 14  | 16  | ERFSHLFDPO NA | NA |
| 32  | 45  | ERFSHLFLGV NA | NA |
| 17  | 16  | ERFSHLWNLH NA | NA |
| 40  | 50  | ERFSHLSRNA NA | NA |
| 119 | 159 | HRLLSLWRAH NA | NA |
| 72  | 98  | HRLLSLWGQV NA | NA |

|     |                   |    |
|-----|-------------------|----|
| 21  | 19 VIYGNLQGVK NA  | NA |
| 36  | 45 YPFGSLRMKS NA  | NA |
| 55  | 92 YPFGSLMRRT NA  | NA |
| 75  | 80 YPFGSLYGER NA  | NA |
| 59  | 60 YPFGSLMYEA NA  | NA |
| 94  | 107 PTFAHLYKRI NA | NA |
| 109 | 164 PTFAHLKLHL NA | NA |
| 66  | 78 PTFAHLAMEW NA  | NA |
| 75  | 82 PTFAHLVNHH NA  | NA |
| 29  | 26 PTFAHLWDIT NA  | NA |
| 38  | 45 PTFAHLTVAF NA  | NA |
| 19  | 16 PTFAHLQASH NA  | NA |
| 51  | 59 PTFAHLKNSI NA  | NA |
| 37  | 53 PTFAHLVSSL NA  | NA |
| 65  | 66 PTFAHLVKK NA   | NA |
| 32  | 30 VRWSWLWRGA NA  | NA |
| 49  | 84 ARLGYLWYLR NA  | NA |
| 82  | 76 AYPWAWRVRG NA  | NA |
| 122 | 174 MYPWAWRGLF NA | NA |
| 64  | 81 DYPWAWRGQS NA  | NA |
| 57  | 76 FYPWAWRGKR NA  | NA |
| 169 | 199 HYPWAWRSGV NA | NA |
| 75  | 90 GYPWAWRALQ NA  | NA |
| 151 | 175 HYPWAWRSVL NA | NA |
| 71  | 62 AYPWAWRREI NA  | NA |
| 47  | 75 WYPWAWRQTS NA  | NA |
| 83  | 78 NYPWAWRGNQ NA  | NA |
| 46  | 51 VYPWAWRGWG NA  | NA |
| 42  | 69 NRVEMLYMGL NA  | NA |
| 65  | 65 NRVEMLYVRI NA  | NA |
| 77  | 95 KYVNHLMTVG NA  | NA |
| 41  | 57 GKVNHLMTRG NA  | NA |
| 43  | 64 ADVNHLMTVI NA  | NA |
| 65  | 92 KFVNHLMTTW NA  | NA |
| 75  | 86 GMVNHLMTRG NA  | NA |
| 64  | 85 SIVNHLMTWW NA  | NA |
| 42  | 39 LTVNHLMTGT NA  | NA |
| 67  | 87 GHVNHLMTGI NA  | NA |
| 35  | 39 TIVNHLMTQQ NA  | NA |
| 48  | 45 VLPEPLYGGR NA  | NA |
| 162 | 201 GHAYHLMSHQ NA | NA |

|     |                   |    |
|-----|-------------------|----|
| 124 | 149 GHAYHLTGVF NA | NA |
| 91  | 120 FMPRNWWLIT NA | NA |
| 33  | 48 GPVYNLRMSH NA  | NA |
| 28  | 48 PPVYNLRGKT NA  | NA |
| 36  | 55 QPVYNLRQKH NA  | NA |
| 55  | 95 FPVYNLRVMA NA  | NA |
| 59  | 53 SPVYNLRNMI NA  | NA |
| 30  | 24 DPVYNLRSPI NA  | NA |
| 61  | 76 GPVYNLRRGG NA  | NA |
| 67  | 75 QPVYNLRSGQ NA  | NA |
| 74  | 66 GPVYNLRGTW NA  | NA |
| 96  | 108 KPVYNLRMHK NA | NA |
| 66  | 72 EPVYNLRMMK NA  | NA |
| 33  | 53 VHFASLIAMW NA  | NA |
| 21  | 25 VHFASLTGTI NA  | NA |
| 34  | 38 VHFASLINGY NA  | NA |
| 36  | 43 VHFASLWNAT NA  | NA |
| 34  | 48 VHFASLAGTK NA  | NA |
| 8   | 16 VHFASLANLQ NA  | NA |
| 30  | 59 VHFASLIRQG NA  | NA |
| 48  | 54 VHFASLTSWS NA  | NA |
| 8   | 12 VHFASLKQSY NA  | NA |
| 37  | 44 FNPIHLYRSG NA  | NA |
| 28  | 29 FNPIHLYAPQ NA  | NA |
| 7   | 8 HFGEQLRILQ NA   | NA |
| 32  | 33 CPFEFRLRVLK NA | NA |
| 57  | 43 SPFWGLRVLK NA  | NA |
| 38  | 48 SNLNSWMNGY NA  | NA |
| 71  | 60 SNLNSWIGWT NA  | NA |
| 44  | 54 SNLNSMRYIQ NA  | NA |
| 17  | 21 SNLNSWTYKG NA  | NA |
| 54  | 51 SNLNSWVQSG NA  | NA |
| 42  | 41 RKPAPWTDGW NA  | NA |
| 43  | 63 RKPAPWWSQV NA  | NA |
| 51  | 47 RKPAPWQLAQ NA  | NA |
| 14  | 19 RKPAPWQDIT NA  | NA |
| 20  | 21 RAPLHMQMLI NA  | NA |
| 56  | 67 ARVRHLTGIW NA  | NA |
| 50  | 60 ARVRHLMNTL NA  | NA |
| 38  | 58 ARVRHLMAGY NA  | NA |
| 51  | 51 YDVYNLTGHW NA  | NA |

|     |     |                |    |
|-----|-----|----------------|----|
| 101 | 112 | MPYWYLRIGL NA  | NA |
| 55  | 55  | FFAEWLRIGL NA  | NA |
| 65  | 75  | HSFSWLRIGL NA  | NA |
| 34  | 47  | RRPTNLMGGV NA  | NA |
| 65  | 75  | WRLGNLWMAG NA  | NA |
| 98  | 123 | ARLGNLWVHY NA  | NA |
| 97  | 107 | FRLGNLWVQV NA  | NA |
| 59  | 96  | TRLGNLWAI F NA | NA |
| 35  | 50  | PRLGNLWGHW NA  | NA |
| 26  | 24  | RRLGNLWVIS NA  | NA |
| 26  | 41  | ERLGNLWMKS NA  | NA |
| 50  | 72  | GRLGNLWVWR NA  | NA |
| 89  | 116 | SRLGNLWMSK NA  | NA |
| 128 | 164 | HRLGNLWYTQ NA  | NA |
| 21  | 35  | RQWRALKREH NA  | NA |
| 44  | 63  | RQWRALKVRT NA  | NA |
| 29  | 48  | AHYASLQLWY NA  | NA |
| 57  | 72  | AHYASLYQIQ NA  | NA |
| 20  | 28  | EHAWNLOQNTY NA | NA |
| 97  | 106 | EHAWNLTARH NA  | NA |
| 76  | 104 | GSLAHLYMEL NA  | NA |
| 27  | 34  | GSLAHLASVG NA  | NA |
| 63  | 74  | GSLAHLMAMA NA  | NA |
| 40  | 53  | GSLAHLAKLG NA  | NA |
| 41  | 50  | GSLAHLYG TG NA | NA |
| 32  | 31  | SSVWHIQMGG NA  | NA |
| 27  | 26  | SSVWHIQDSG NA  | NA |
| 136 | 188 | QNYHHLRHTG NA  | NA |
| 130 | 168 | WSFYHLRHTQ NA  | NA |
| 124 | 118 | IYAYHLRHTF NA  | NA |
| 142 | 172 | TAYYHLRHTH NA  | NA |
| 174 | 174 | TNWHHLRHTR NA  | NA |
| 108 | 134 | QQFYHLRHTI NA  | NA |
| 47  | 54  | GRHYHLRHTK NA  | NA |
| 50  | 68  | KFWFNLFKGA NA  | NA |
| 91  | 107 | KFWFNLSQWH NA  | NA |
| 76  | 121 | KFWFNLHKWS NA  | NA |
| 35  | 48  | KFWFNLKVVY NA  | NA |
| 50  | 55  | KFWFNLWGAR NA  | NA |
| 61  | 84  | KFWFNLTGKH NA  | NA |
| 71  | 89  | KFWFNLTLP L NA | NA |

|     |     |                |    |
|-----|-----|----------------|----|
| 72  | 86  | KFWFNLHQQA NA  | NA |
| 50  | 52  | KFWFNLHDIG NA  | NA |
| 152 | 184 | ERSLAWTAHY NA  | NA |
| 112 | 145 | ERSLAWMSPF NA  | NA |
| 71  | 60  | DAFRHLRMLS NA  | NA |
| 22  | 47  | YAFRHLRKKT NA  | NA |
| 74  | 84  | EAFRHLRKHG NA  | NA |
| 105 | 138 | NAFRHLRKWI NA  | NA |
| 12  | 12  | GAFRHLSVK NA   | NA |
| 16  | 15  | GAFRHRRPK NA   | NA |
| 63  | 72  | VAFRHLYWF NA   | NA |
| 98  | 128 | QAFRHLSWT NA   | NA |
| 67  | 67  | FAFRHLRDWF NA  | NA |
| 7   | 18  | GAFHLRLIW NA   | NA |
| 31  | 41  | GMPRYMARVF NA  | NA |
| 29  | 27  | GMPRYMYNS NA   | NA |
| 35  | 30  | GMPRYMMAPQ NA  | NA |
| 50  | 50  | GMPRYMMYNY NA  | NA |
| 69  | 67  | GMPRYMANGR NA  | NA |
| 77  | 106 | GMPRYMRGIA NA  | NA |
| 63  | 59  | GMPRYMARAG NA  | NA |
| 44  | 70  | AYGSHLTGVQ NA  | NA |
| 82  | 87  | AYGSHLWDSY NA  | NA |
| 97  | 152 | MVHFHLINHV NA  | NA |
| 50  | 59  | GVHFHLIRQL NA  | NA |
| 51  | 56  | IVHFHLIVVG NA  | NA |
| 31  | 59  | MVHFHLIDSI NA  | NA |
| 56  | 69  | PVHFHLIAIQ NA  | NA |
| 68  | 78  | YVHFHLIYRW NA  | NA |
| 49  | 76  | AVHFHLINIG NA  | NA |
| 12  | 14  | TVHFHLILIIY NA | NA |
| 37  | 46  | QVHFHLIAKG NA  | NA |
| 40  | 45  | MVHFHLINPH NA  | NA |
| 33  | 33  | LAWAHITYWW NA  | NA |
| 34  | 47  | LAWAHITVTA NA  | NA |
| 37  | 43  | VDWAHLQLSQ NA  | NA |
| 45  | 57  | GKWAHLQLSY NA  | NA |
| 15  | 16  | KIWAHLQLSY NA  | NA |
| 87  | 134 | MHWRNLRLQQ NA  | NA |
| 88  | 104 | CWYRNLRQLG NA  | NA |
| 56  | 75  | SEWQGLFGQA NA  | NA |

|     |                   |    |
|-----|-------------------|----|
| 91  | 109 SEWQGLTNHH NA | NA |
| 51  | 62 SEWQGLTQMF NA  | NA |
| 49  | 55 SEWQGLTQGY NA  | NA |
| 48  | 37 SEWQGLTQLG NA  | NA |
| 43  | 51 SEWQGLTNMY NA  | NA |
| 51  | 58 SEWQGLRASG NA  | NA |
| 46  | 61 SEWQGLKVPV NA  | NA |
| 57  | 68 SEWQGLWLSV NA  | NA |
| 52  | 52 NFWSSLRVPT NA  | NA |
| 48  | 59 SFWSSLRGEG NA  | NA |
| 65  | 88 IFWSSLRKPW NA  | NA |
| 21  | 30 SFWSSLRGKG NA  | NA |
| 68  | 62 TFWSSLRKHV NA  | NA |
| 55  | 63 YFWSSLRKRI NA  | NA |
| 68  | 87 FFWSSLRRIA NA  | NA |
| 112 | 135 KFWSSLRQHY NA | NA |
| 61  | 101 WFWSSLRAQQ NA | NA |
| 65  | 68 KFWSSLRVLR NA  | NA |
| 32  | 35 VFWSSLRDTS NA  | NA |
| 11  | 15 SRAYSLTQPT NA  | NA |
| 39  | 46 SRAYSLTLLY NA  | NA |
| 59  | 69 RTASHLMGIG NA  | NA |
| 81  | 99 RTASHLRAMG NA  | NA |
| 58  | 78 RTASHLRMVY NA  | NA |
| 64  | 73 RTASHLKKAW NA  | NA |
| 16  | 21 RTASHLTSTF NA  | NA |
| 38  | 50 KDYLHLTSAR NA  | NA |
| 66  | 78 KDYLHLMKPV NA  | NA |
| 31  | 32 KDYLHLMMMT NA  | NA |
| 75  | 92 FPGRHLWKII NA  | NA |
| 39  | 58 FPGRHLMDPA NA  | NA |
| 50  | 60 FPGRHLSQSG NA  | NA |
| 64  | 80 FPGRHLSVW NA   | NA |
| 10  | 20 PAYFPLQQPG NA  | NA |
| 22  | 35 PAYFPLSATR NA  | NA |
| 20  | 28 PAYFPLQLKI NA  | NA |
| 52  | 52 PAYFPLAGRH NA  | NA |
| 50  | 54 PAYFPLWKHS NA  | NA |
| 20  | 24 PAYFPLKAQS NA  | NA |
| 35  | 40 DAGVNLTMGs NA  | NA |
| 26  | 39 NRYVNLTMGs NA  | NA |

|     |     |                |    |
|-----|-----|----------------|----|
| 37  | 44  | QQWYNLTMGS NA  | NA |
| 26  | 30  | MHGINLTMGS NA  | NA |
| 58  | 74  | PWFVNLTMGs NA  | NA |
| 48  | 86  | TQVFGLSGPK NA  | NA |
| 29  | 42  | TQVFGLTVIV NA  | NA |
| 45  | 50  | TQVFGLTMMV NA  | NA |
| 54  | 68  | TQVFGLQMHF NA  | NA |
| 52  | 75  | TQVFGLSNGK NA  | NA |
| 50  | 71  | TQVFGLRYIR NA  | NA |
| 47  | 60  | VKAYNLRNTY NA  | NA |
| 17  | 10  | VKAYNLTGSR NA  | NA |
| 61  | 66  | VFVSNLWSAH NA  | NA |
| 36  | 52  | VFVSNLWGLG NA  | NA |
| 65  | 85  | VFVSNLWVGK NA  | NA |
| 43  | 36  | VFVSNLMASV NA  | NA |
| 38  | 51  | WQYSNLFGLA NA  | NA |
| 24  | 45  | WQYSNLQNNR NA  | NA |
| 28  | 48  | WQYSNLSKWA NA  | NA |
| 60  | 76  | WQYSNLKVLS NA  | NA |
| 56  | 52  | WQYSNLSRPG NA  | NA |
| 23  | 38  | WQYSNLAYKA NA  | NA |
| 40  | 30  | WQYSNLAQTW NA  | NA |
| 14  | 13  | WQYSNLFREG NA  | NA |
| 93  | 112 | IWAYNMRRRT NA  | NA |
| 219 | 229 | NWAYNMRRLG NA  | NA |
| 92  | 91  | MWAYNMRRATQ NA | NA |
| 59  | 67  | VWAYNMRAKL NA  | NA |
| 97  | 114 | PWAYNMRQLH NA  | NA |
| 86  | 86  | RWAYNMRGVS NA  | NA |
| 33  | 59  | FWAYNMRKTG NA  | NA |
| 77  | 102 | DWAYNMRNHF NA  | NA |
| 86  | 103 | KWAYNMRGKQ NA  | NA |
| 39  | 45  | PWAYNMRGTS NA  | NA |
| 163 | 194 | MWAYNMRLGA NA  | NA |
| 46  | 64  | VWWMQLRVKR NA  | NA |
| 105 | 135 | VPWGNLTRRS NA  | NA |
| 43  | 49  | SMGSHLMGES NA  | NA |
| 44  | 76  | SMGSHLMDPV NA  | NA |
| 39  | 47  | SMGSHLTQGQ NA  | NA |
| 57  | 80  | SMGSHLTGHL NA  | NA |
| 37  | 36  | NTSAWLWSIK NA  | NA |

|     |                   |    |
|-----|-------------------|----|
| 23  | 21 NRFSNLRGSK NA  | NA |
| 52  | 35 NRFSNLWMIS NA  | NA |
| 11  | 18 NRFSNLKQSI NA  | NA |
| 34  | 38 NRFSNLHQRS NA  | NA |
| 6   | 1 NRFSNLQQMG NA   | NA |
| 40  | 41 NRFSNLMDAH NA  | NA |
| 52  | 75 NRFSNLRMHI NA  | NA |
| 38  | 49 AHFAHLKLEV NA  | NA |
| 66  | 69 AHFAHLMYVT NA  | NA |
| 76  | 94 AHFAHLSGAV NA  | NA |
| 46  | 76 AHFAHLISHY NA  | NA |
| 93  | 71 AHFAHLTYNH NA  | NA |
| 17  | 34 AHFAHLTSGQ NA  | NA |
| 77  | 117 AHFAHLKQWR NA | NA |
| 58  | 54 TKYAYIMGSW NA  | NA |
| 48  | 63 WKVSSLRVSW NA  | NA |
| 60  | 62 WKVSSLWGWL NA  | NA |
| 34  | 30 RTMLHMWMPA NA  | NA |
| 121 | 120 RTMLHMMRGW NA | NA |
| 55  | 62 RTMLHMMNPG NA  | NA |
| 52  | 56 HDYFNLQYRS NA  | NA |
| 62  | 67 HDYFNLKGHA NA  | NA |
| 73  | 74 HDYFNLQVMH NA  | NA |
| 27  | 32 HDYFNLMMKG NA  | NA |
| 44  | 56 HDYFNLMGMA NA  | NA |
| 100 | 123 HDYFNLMNVV NA | NA |
| 39  | 49 HDYFNLTMNA NA  | NA |
| 52  | 65 PLPLNWRKNG NA  | NA |
| 64  | 74 TLPLNWRDGL NA  | NA |
| 67  | 71 KLPLNWRQSG NA  | NA |
| 74  | 82 ILPLNWRQOS NA  | NA |
| 79  | 106 RLPLNWRMHF NA | NA |
| 49  | 59 TLPLNWRATS NA  | NA |
| 88  | 127 NLPLNWRRQG NA | NA |
| 107 | 141 SLPLNWRRWS NA | NA |
| 80  | 104 FLPLNWRAQT NA | NA |
| 75  | 87 ELPLNWRGWY NA  | NA |
| 69  | 119 FQFEHLYGII NA | NA |
| 66  | 93 FQFEHLRSLY NA  | NA |
| 52  | 46 FQFEHLTDTQ NA  | NA |
| 71  | 86 FQFEHLTLPT NA  | NA |



|     |     |                |    |
|-----|-----|----------------|----|
| 60  | 70  | FQFEHLYSRT NA  | NA |
| 76  | 86  | FQFEHLAKEF NA  | NA |
| 172 | 203 | FQFEHLKMHY NA  | NA |
| 32  | 49  | FQFEHLQSQS NA  | NA |
| 36  | 34  | HTFLHWRSNR NA  | NA |
| 54  | 53  | AIFLHWRSV NA   | NA |
| 142 | 147 | CNFLHWRSR NA   | NA |
| 95  | 107 | GAFLHWRSAR NA  | NA |
| 37  | 39  | MMFLHWRSY NA   | NA |
| 19  | 24  | IFFLHWRS PK NA | NA |
| 34  | 54  | KDFLHWRS HK NA | NA |
| 14  | 12  | RFFLHWRS IR NA | NA |
| 11  | 31  | MMFLHWRS LL NA | NA |
| 73  | 108 | EHGAALTMPS NA  | NA |
| 57  | 93  | CKFAALTMPI NA  | NA |
| 6   | 11  | VKVFSMAVPG NA  | NA |
| 11  | 26  | VKVFSMQGNS NA  | NA |
| 81  | 85  | RQLAHIMYKW NA  | NA |
| 11  | 21  | GEFAALQGKI NA  | NA |
| 30  | 30  | YEFAALQLTT NA  | NA |
| 48  | 37  | CEFAALQDVH NA  | NA |
| 29  | 32  | QEFAALQNGH NA  | NA |
| 62  | 61  | QEFAALQYGW NA  | NA |
| 54  | 53  | REFAALQVRK NA  | NA |
| 83  | 73  | FEFAALQMAL NA  | NA |
| 32  | 54  | MEFAALQLSG NA  | NA |
| 43  | 37  | PEFAALQNEW NA  | NA |
| 31  | 46  | MEFAALQGQG NA  | NA |
| 41  | 54  | LEFAALQGPV NA  | NA |
| 8   | 7   | TFFLHLTNIG NA  | NA |
| 32  | 37  | NFFLHLTVNT NA  | NA |
| 27  | 19  | NFFLHLTQGT NA  | NA |
| 20  | 26  | PFFLHLTAAG NA  | NA |
| 19  | 23  | RFFLHLTKSI NA  | NA |
| 11  | 16  | EFFLHLTYTS NA  | NA |
| 38  | 39  | DFFLHLTSWF NA  | NA |
| 11  | 20  | IFFLHLTAWH NA  | NA |
| 21  | 17  | TFFLHLTLHT NA  | NA |
| 35  | 40  | QFFLHLTNQQ NA  | NA |
| 51  | 67  | LMFAHLTSER NA  | NA |
| 14  | 30  | TSFAHLTSNV NA  | NA |

|     |                    |    |
|-----|--------------------|----|
| 51  | 56 WYFAHLTSNG NA   | NA |
| 10  | 20 YDFAHLTSET NA   | NA |
| 34  | 47 HPFAHLTSMT NA   | NA |
| 14  | 50 RYFAHLTSHG NA   | NA |
| 74  | 86 CDF AHLTSHF NA  | NA |
| 48  | 47 DHFAHLTSEQ NA   | NA |
| 94  | 116 HGLWSLWRHQ NA  | NA |
| 42  | 47 HGLWSLMGTK NA   | NA |
| 65  | 62 HGLWSLMSQG NA   | NA |
| 27  | 34 HGLWSLTYVF NA   | NA |
| 30  | 50 HGLWSLTYGS NA   | NA |
| 84  | 109 HGLWSLTNWH NA  | NA |
| 68  | 83 HGLWSLYDWT NA   | NA |
| 24  | 29 HGLWSLALWL NA   | NA |
| 32  | 47 HGLWSLAAIQ NA   | NA |
| 58  | 66 EPFWALKKVG NA   | NA |
| 80  | 83 EQLSFLWGTL NA   | NA |
| 54  | 67 EQLSFLWALY NA   | NA |
| 60  | 68 GLLLNMYREG NA   | NA |
| 38  | 36 GLLLNMMYEV NA   | NA |
| 56  | 53 GLLLNMKDSV NA   | NA |
| 49  | 37 GLLLNMTRSF NA   | NA |
| 23  | 19 GLLLNMYQSY NA   | NA |
| 92  | 109 EVARAWIRKF NA  | NA |
| 34  | 45 EVARAWMVEG NA   | NA |
| 138 | 164 EVARAWYRRS NA  | NA |
| 81  | 109 EVARAWQGMK NA  | NA |
| 77  | 83 EVARAWMAGV NA   | NA |
| 84  | 105 EVARAWSQPR NA  | NA |
| 87  | 107 EVARAWADV K NA | NA |
| 58  | 70 TTLRWWWQOK NA   | NA |
| 56  | 66 TTLRWWTNRK NA   | NA |
| 56  | 47 TTLRWWASWR NA   | NA |
| 16  | 30 TTLRWWMQWG NA   | NA |
| 51  | 49 TTLRWYVEW NA    | NA |
| 64  | 98 VYWGNMFSGK NA   | NA |
| 99  | 111 VYWGNMKKLG NA  | NA |
| 40  | 50 VYWGNMIANY NA   | NA |
| 48  | 61 VYWGNMQLRG NA   | NA |
| 67  | 65 VYWGNMYNGT NA   | NA |
| 96  | 99 VYWGNMYRPQ NA   | NA |

|     |     |                |    |
|-----|-----|----------------|----|
| 48  | 39  | VYWGNMQNIG NA  | NA |
| 83  | 85  | VYWGNMHGGY NA  | NA |
| 48  | 71  | RNPEWMRMAK NA  | NA |
| 93  | 127 | RNPEWMQRRK NA  | NA |
| 26  | 31  | RNPEWMKGTY NA  | NA |
| 65  | 83  | RNPEWMKGWV NA  | NA |
| 54  | 64  | NRLSHWAGKT NA  | NA |
| 97  | 111 | NRLSHWKSAF NA  | NA |
| 63  | 82  | NRLSHWRAAA NA  | NA |
| 97  | 131 | NRLSHWAASL NA  | NA |
| 79  | 92  | NRLSHWKQMG NA  | NA |
| 75  | 76  | NRLSHWTMGF NA  | NA |
| 34  | 36  | NRLSHWHNNT NA  | NA |
| 172 | 207 | NRLSHWQQQH NA  | NA |
| 59  | 75  | NRLSHWWRIT NA  | NA |
| 89  | 90  | NRLSHWWQIQ NA  | NA |
| 29  | 25  | WRASHLMKGI NA  | NA |
| 87  | 114 | GRASHLMYQS NA  | NA |
| 4   | 4   | LRASHLMMLT NA  | NA |
| 102 | 126 | ERASHLMGMV NA  | NA |
| 82  | 99  | SRASHLMVAG NA  | NA |
| 16  | 13  | LRASHLMDRQ NA  | NA |
| 5   | 4   | LRASHLMNIS NA  | NA |
| 45  | 41  | YRASHLMDLK NA  | NA |
| 112 | 126 | TRASHLMRWG NA  | NA |
| 22  | 25  | FSFRNLRISK NA  | NA |
| 41  | 42  | EDFRNLRILG NA  | NA |
| 82  | 92  | MHFRNLRINS NA  | NA |
| 85  | 94  | MHFRNLRIVG NA  | NA |
| 69  | 74  | NTFRNLRIGT NA  | NA |
| 10  | 9   | GFRNLRIHG NA   | NA |
| 54  | 60  | VMFRNLRIVG NA  | NA |
| 47  | 53  | NIFRNLRIILS NA | NA |
| 41  | 54  | PPFRNLRIGQ NA  | NA |
| 48  | 44  | WFRNLRIPG NA   | NA |
| 85  | 122 | HLAYHMTGMK NA  | NA |
| 149 | 171 | HLAYHMAAAW NA  | NA |
| 135 | 216 | HLAYHMWMPY NA  | NA |
| 90  | 98  | HLAYHMAVIS NA  | NA |
| 48  | 65  | HLAYHMMNSA NA  | NA |
| 210 | 278 | HLAYHMQARH NA  | NA |

|     |                   |    |
|-----|-------------------|----|
| 89  | 157 HLAYHMTLGY NA | NA |
| 242 | 318 HLAYHMWYNV NA | NA |
| 115 | 163 HLAYHMRVKQ NA | NA |
| 68  | 63 HAHASLWMMG NA  | NA |
| 38  | 28 TTHYSLTYTK NA  | NA |
| 60  | 66 VLWAGLKNES NA  | NA |
| 19  | 19 VMYGNLKRET NA  | NA |
| 12  | 19 VMYGNLKRGG NA  | NA |
| 2   | 1 VMYGNLQRVY NA   | NA |
| 18  | 29 VMYGNLMNSS NA  | NA |
| 22  | 28 VMYGNLMAES NA  | NA |
| 24  | 29 SLVLNMSGSL NA  | NA |
| 59  | 76 SLVLNMSMHL NA  | NA |
| 53  | 79 SLVLNMSYLV NA  | NA |
| 46  | 48 SLVLNMTKEG NA  | NA |
| 41  | 58 SLVLNMSMKH NA  | NA |
| 77  | 88 SLVLNMSRPL NA  | NA |
| 12  | 13 TSFRMLFRKT NA  | NA |
| 25  | 26 TSFRMLHDWT NA  | NA |
| 4   | 15 TSFRMLKSIK NA  | NA |
| 38  | 36 TSFRMLWGNG NA  | NA |
| 25  | 24 TSFRMLTNRL NA  | NA |
| 11  | 19 TSFRMLQNWF NA  | NA |
| 19  | 8 TSFRMLFLEF NA   | NA |
| 10  | 9 TSFRMLWYNG NA   | NA |
| 18  | 14 TSFRMLRNSG NA  | NA |
| 5   | 11 TSFRMLAKTG NA  | NA |
| 51  | 53 YLVRYLMKNG NA  | NA |
| 82  | 104 AMYANMRRAG NA | NA |
| 90  | 121 FYYANMRRHH NA | NA |
| 103 | 119 VTYANMRRSV NA | NA |
| 143 | 224 HSYANMRRWF NA | NA |
| 65  | 88 GYYANMRRQT NA  | NA |
| 132 | 154 PIYANMRRST NA | NA |
| 85  | 167 KNYANMRRSF NA | NA |
| 100 | 122 SSYANMRRRH NA | NA |
| 54  | 88 TAYANMRRIR NA  | NA |
| 155 | 167 RDLSHLRYNR NA | NA |
| 191 | 264 RDLSHLRRAF NA | NA |
| 45  | 50 RDLSHLMGMF NA  | NA |
| 156 | 189 RDLSHLRYGS NA | NA |

|     |                   |    |
|-----|-------------------|----|
| 66  | 77 RDLSHLWYMG NA  | NA |
| 27  | 30 RFALNLTGK NA   | NA |
| 51  | 52 LSHAWLWGIW NA  | NA |
| 72  | 96 LSHAWLTGVK NA  | NA |
| 47  | 62 NRPASWQMHG NA  | NA |
| 72  | 73 NRPASWMSTT NA  | NA |
| 50  | 60 NRPASWWKVT NA  | NA |
| 31  | 23 NRPASWQKKG NA  | NA |
| 32  | 40 NRPASWTSKI NA  | NA |
| 19  | 22 WIVKHLQLTG NA  | NA |
| 33  | 46 QIVKHLQGWS NA  | NA |
| 63  | 93 IIVKHLQMNH NA  | NA |
| 36  | 59 IIVKHLQGAR NA  | NA |
| 42  | 38 LIVKHLQGGK NA  | NA |
| 75  | 70 FIVKHLQYKG NA  | NA |
| 28  | 20 GIVKHLQKMS NA  | NA |
| 26  | 34 DIVKHLQLWF NA  | NA |
| 34  | 38 PIVKHLQGEV NA  | NA |
| 56  | 63 MIVKHLQDAA NA  | NA |
| 47  | 36 TKLKHLQGNV NA  | NA |
| 102 | 142 DKLKHLQVMH NA | NA |
| 21  | 40 GKLKHLQAQG NA  | NA |
| 33  | 48 SKLKHLQSQI NA  | NA |
| 38  | 43 WKLKHLQMEF NA  | NA |
| 180 | 220 FKLKHLQKMW NA | NA |
| 155 | 208 IKLKHLQAWK NA | NA |
| 46  | 47 VKLKHLQGRG NA  | NA |
| 33  | 53 WKLKHLQRTW NA  | NA |
| 109 | 127 IKLKHLQKRQ NA | NA |
| 47  | 62 GGPSMLKRTK NA  | NA |
| 75  | 88 GGPSMLRMTV NA  | NA |
| 66  | 57 QSWYGMVHF NA   | NA |
| 57  | 61 QSWYGMWDAL NA  | NA |
| 23  | 15 QSWYGMTNLR NA  | NA |
| 61  | 62 QSWYGMWKMY NA  | NA |
| 16  | 41 QSWYGMVSL NA   | NA |
| 55  | 81 QDPQSWRTNH NA  | NA |
| 33  | 53 KAPQSWRTMA NA  | NA |
| 108 | 152 KSPQSWRTIL NA | NA |
| 138 | 163 PHPQSWRTIG NA | NA |
| 207 | 255 FYPQSWRTWF NA | NA |

|     |                     |    |
|-----|---------------------|----|
| 47  | 59 IDPQSWRTTS NA    | NA |
| 52  | 82 YDPQSWRTPH NA    | NA |
| 209 | 229 HQPQSWRTAY NA   | NA |
| 217 | 261 EKPQSWRTSQ NA   | NA |
| 72  | 80 QRPQSWRTTH NA    | NA |
| 78  | 97 KPPQSWRTKY NA    | NA |
| 44  | 115 NKVYAWSVGF NA   | NA |
| 71  | 89 NKVYAWKQIL NA    | NA |
| 25  | 39 NKVYAWKVKV NA    | NA |
| 62  | 64 NKVYAWSJWT NA    | NA |
| 65  | 67 NKVYAWYQWI NA    | NA |
| 105 | 126 NKVYAWRGM I NA  | NA |
| 56  | 97 NKVYAWKLAI NA    | NA |
| 87  | 106 NKVYAWRKHT NA   | NA |
| 8   | 7 GPFQHLLR KSI NA   | NA |
| 101 | 132 AMWQHLLR KSV NA | NA |
| 43  | 43 SRFQHLLR KSG NA  | NA |
| 68  | 78 DNWQHLLR KSY NA  | NA |
| 24  | 22 YSATNLKGSV NA    | NA |
| 22  | 23 YSATNLYQLG NA    | NA |
| 37  | 44 YSATNLAGAK NA    | NA |
| 9   | 20 YSATNLKYSH NA    | NA |
| 14  | 21 YSATNLQQAK NA    | NA |
| 29  | 41 YSATNLKAWG NA    | NA |
| 43  | 38 YSATNLQAGI NA    | NA |
| 74  | 69 KNRRNLMNTI NA    | NA |
| 68  | 98 THRRNLMNAR NA    | NA |
| 16  | 26 PHRRNLMNPT NA    | NA |
| 56  | 60 PIRRNLMNLI NA    | NA |
| 3   | 3 MTRRNLMNLQ NA     | NA |
| 20  | 26 NWRRNLMNSY NA    | NA |
| 20  | 30 PQRRNLMNTF NA    | NA |
| 49  | 46 DNRRNLMNLY NA    | NA |
| 42  | 59 PHRRNLMNEA NA    | NA |
| 104 | 93 NSVFWMRGAL NA    | NA |
| 31  | 46 PQVFWMRGEK NA    | NA |
| 54  | 63 MSVFWMRGPT NA    | NA |
| 38  | 57 EIVFWMRGHL NA    | NA |
| 103 | 115 HWVFWMRGHY NA   | NA |
| 28  | 42 DYVFWMRGGA NA    | NA |
| 30  | 42 GKVFWMRGHT NA    | NA |

|     |     |                |    |
|-----|-----|----------------|----|
| 48  | 67  | GQVFWMRGKH NA  | NA |
| 52  | 59  | LLYASLTQHG NA  | NA |
| 9   | 15  | EMYGNMMDGT NA  | NA |
| 48  | 61  | EMYGNMFRMV NA  | NA |
| 15  | 29  | EMYGNMMQLS NA  | NA |
| 30  | 40  | EMYGNMVMSY NA  | NA |
| 39  | 45  | EMYGNMRANY NA  | NA |
| 10  | 17  | EMYGNMALMA NA  | NA |
| 17  | 19  | EMYGNMVNEA NA  | NA |
| 14  | 18  | EMYGNMYSLL NA  | NA |
| 36  | 29  | EMYGNMHQWF NA  | NA |
| 84  | 92  | ISWLNLTAHQ NA  | NA |
| 74  | 122 | ISWLNL SRGW NA | NA |
| 48  | 55  | LTPRYWQRTS NA  | NA |
| 37  | 44  | LTPRYWAYML NA  | NA |
| 38  | 35  | LTPRYWAKSK NA  | NA |
| 60  | 59  | LTPRYWRGGQ NA  | NA |
| 50  | 40  | GNVANLMLKQ NA  | NA |
| 27  | 36  | GNVANLTQLA NA  | NA |
| 85  | 90  | RRVLMMTKWL NA  | NA |
| 41  | 45  | ANYSNIRNIL NA  | NA |
| 92  | 75  | ANYSNIWNHY NA  | NA |
| 63  | 80  | ANYSNIWGHL NA  | NA |
| 26  | 30  | IPAFNLRQEG NA  | NA |
| 36  | 50  | IPAFNLRSGF NA  | NA |
| 39  | 64  | HIWQNLWDLG NA  | NA |
| 82  | 126 | HIWQNLFMWR NA  | NA |
| 168 | 202 | HIWQNLSAAW NA  | NA |
| 63  | 80  | HIWQNLKLAW NA  | NA |
| 73  | 112 | HIWQNLMAAR NA  | NA |
| 36  | 43  | RKVRNWWGNS NA  | NA |
| 52  | 73  | RKVRNWDYDEG NA | NA |
| 86  | 77  | RKVRNWAAGK NA  | NA |
| 85  | 104 | RKVRNWMAIL NA  | NA |
| 17  | 18  | RKVRNWVLQF NA  | NA |
| 40  | 61  | RKVRNWTGAT NA  | NA |
| 30  | 42  | RKVRNWVAHG NA  | NA |
| 42  | 43  | RKVRNWQNKK NA  | NA |
| 27  | 46  | RKVRNWRQSS NA  | NA |
| 80  | 78  | RKVRNWFAGF NA  | NA |
| 38  | 41  | RKVRNWFGLG NA  | NA |

|     |     |                |    |
|-----|-----|----------------|----|
| 36  | 37  | RSHASLTMGS NA  | NA |
| 46  | 54  | RSHASLWVKQ NA  | NA |
| 30  | 50  | TVLNSLMGQQ NA  | NA |
| 29  | 35  | TVLNSLMNQK NA  | NA |
| 18  | 17  | TVLNSLWMMI NA  | NA |
| 31  | 41  | SLPTSLQRGY NA  | NA |
| 44  | 62  | RLLLNMYSET NA  | NA |
| 87  | 95  | RLLLNMTLPR NA  | NA |
| 44  | 69  | RLLLNMALEW NA  | NA |
| 88  | 87  | RLLLNMKDHI NA  | NA |
| 78  | 84  | RLLLNMTGQQ NA  | NA |
| 71  | 63  | RLLLNMYMLG NA  | NA |
| 35  | 48  | RLLLNMMNIW NA  | NA |
| 97  | 113 | RLLLNMYVQK NA  | NA |
| 45  | 79  | RLLLNMTDTV NA  | NA |
| 52  | 80  | PSFRGLRNGG NA  | NA |
| 51  | 65  | DSFRGLRMQR NA  | NA |
| 44  | 63  | GSFRGLRSTG NA  | NA |
| 20  | 36  | SSFRGLRMES NA  | NA |
| 57  | 80  | FSFRGLRDTL NA  | NA |
| 30  | 24  | FSFRGLRKLK NA  | NA |
| 26  | 39  | ISFRGLRDSK NA  | NA |
| 50  | 56  | FSFRGLRYRI NA  | NA |
| 105 | 162 | LWYGHLQYQ NA   | NA |
| 42  | 44  | LWYGHLQVVV NA  | NA |
| 79  | 100 | LWYGHLMGQT NA  | NA |
| 198 | 235 | LWYGHLTARW NA  | NA |
| 80  | 88  | LWYGHLKARI NA  | NA |
| 20  | 23  | PKFSHMILTK NA  | NA |
| 14  | 26  | PKFSHMIMSG NA  | NA |
| 21  | 19  | PKFSHMKMKG NA  | NA |
| 31  | 27  | PKFSHMOVSTL NA | NA |
| 68  | 63  | PKFSHMKGQS NA  | NA |
| 63  | 86  | PKFSHMSGPH NA  | NA |
| 35  | 59  | PKFSHMFJWT NA  | NA |
| 49  | 57  | PKFSHMSRMV NA  | NA |
| 39  | 40  | PKFSHMFNGY NA  | NA |
| 19  | 25  | PKFSHMYSWF NA  | NA |
| 46  | 51  | STVFHMAKVS NA  | NA |
| 41  | 61  | STVFHMYGTG NA  | NA |
| 70  | 80  | STVFHMTLWQ NA  | NA |



|     |     |                |    |
|-----|-----|----------------|----|
| 84  | 97  | STVFHMQGRA NA  | NA |
| 72  | 80  | STVFHMRGGI NA  | NA |
| 55  | 58  | STVFHMYDNY NA  | NA |
| 35  | 43  | RQVRYLMVPK NA  | NA |
| 48  | 67  | RQVRYLMKGT NA  | NA |
| 44  | 49  | PVFQSLKKMA NA  | NA |
| 24  | 33  | PVFQSLYANR NA  | NA |
| 45  | 56  | PVFQSLMDNK NA  | NA |
| 28  | 37  | PVFQSLTGIG NA  | NA |
| 95  | 96  | PVFQSLRQSH NA  | NA |
| 30  | 35  | PVFQSLYQGG NA  | NA |
| 156 | 165 | FVYRHMRAWW NA  | NA |
| 201 | 288 | GVYRHMRRRG NA  | NA |
| 208 | 268 | DVYRHMLRPQ NA  | NA |
| 118 | 153 | GVYRHMRYRG NA  | NA |
| 56  | 86  | FVYRHMLVVG NA  | NA |
| 128 | 143 | MVYRHMRRII NA  | NA |
| 48  | 60  | GVYRHMRDKG NA  | NA |
| 98  | 138 | LVYRHMROMEK NA | NA |
| 138 | 184 | QVYRHMVMGQ NA  | NA |
| 14  | 6   | VNARMLTSVG NA  | NA |
| 54  | 57  | VNARMLMAVY NA  | NA |
| 58  | 53  | VNARMLQVPY NA  | NA |
| 22  | 18  | SLFLHMVSGH NA  | NA |
| 18  | 21  | SLFLHMKMGG NA  | NA |
| 24  | 25  | SLFLHMASWL NA  | NA |
| 31  | 35  | SLFLHMTNAG NA  | NA |
| 19  | 21  | SLFLHMIRTR NA  | NA |
| 15  | 27  | SLFLHMVYVL NA  | NA |
| 36  | 45  | SLFLHMMYKA NA  | NA |
| 12  | 14  | ARWSGMMALQ NA  | NA |
| 84  | 103 | PWWSGMMAHQ NA  | NA |
| 40  | 69  | AHWSGMMAHI NA  | NA |
| 54  | 70  | HSWSGMMANT NA  | NA |
| 51  | 64  | IIWSGMMANQ NA  | NA |
| 84  | 97  | YPWSGMMAGF NA  | NA |
| 75  | 62  | MMWSGMMANG NA  | NA |
| 21  | 57  | LWWSGMMAQY NA  | NA |
| 201 | 283 | HAWSGMMARW NA  | NA |
| 46  | 61  | ENFLHLMNRY NA  | NA |
| 37  | 40  | ENFLHLKQQA NA  | NA |

|     |                   |    |
|-----|-------------------|----|
| 32  | 47 ENFLHLQVAQ NA  | NA |
| 48  | 71 ENFLHLTGNF NA  | NA |
| 23  | 28 ENFLHLMQKY NA  | NA |
| 79  | 104 TVPRAWQVQF NA | NA |
| 81  | 110 QVSWAWKVNK NA | NA |
| 57  | 68 QVSWAWQMIK NA  | NA |
| 61  | 103 QVSWAWTVAH NA | NA |
| 64  | 72 QVSWAWAYPR NA  | NA |
| 33  | 57 QVSWAWIKGT NA  | NA |
| 60  | 72 QVSWAWIRRS NA  | NA |
| 48  | 44 QVSWAWQGVK NA  | NA |
| 69  | 67 QVSWAWSYNW NA  | NA |
| 2   | 2 QVSWAWMLMG NA   | NA |
| 59  | 87 QVSWAWYMQ L NA | NA |
| 19  | 20 TSLANLTANY NA  | NA |
| 24  | 39 TSLANLTMLY NA  | NA |
| 23  | 31 GGYANLTVGF NA  | NA |
| 20  | 18 TGYANLTLAG NA  | NA |
| 30  | 44 CGYANLTKMV NA  | NA |
| 58  | 75 AGYANLTRQY NA  | NA |
| 14  | 28 FGYANLTSVI NA  | NA |
| 26  | 39 GGYANLTQTL NA  | NA |
| 39  | 44 WGYANLTGMS NA  | NA |
| 11  | 17 HGYANLTYNQ NA  | NA |
| 27  | 29 TGYANLTDNV NA  | NA |
| 34  | 61 SGYANLTQGW NA  | NA |
| 7   | 9 YGYANLTLGG NA   | NA |
| 78  | 87 AFLSHWTSGR NA  | NA |
| 134 | 171 AFLSHWRLGT NA | NA |
| 51  | 90 AFLSHWSVER NA  | NA |
| 131 | 141 AFLSHWHQTK NA | NA |
| 107 | 121 AFLSHWRGGF NA | NA |
| 62  | 61 AFLSHWTGSY NA  | NA |
| 88  | 90 AFLSHWAMVS NA  | NA |
| 62  | 74 AFLSHWSKKQ NA  | NA |
| 56  | 87 AFLSHWTMGF NA  | NA |
| 93  | 124 MIFWHLRYRW NA | NA |
| 60  | 80 MIFWHLRYVR NA  | NA |
| 107 | 123 RIFWHLRMHY NA | NA |
| 182 | 222 GIFWHLRRRW NA | NA |
| 82  | 95 HIFWHLRYKA NA  | NA |

|     |     |               |    |
|-----|-----|---------------|----|
| 53  | 65  | PIFWHLRDGY NA | NA |
| 50  | 57  | YIFWHLRAKG NA | NA |
| 55  | 68  | AIFWHLRNQG NA | NA |
| 70  | 80  | AIFWHLRYRI NA | NA |
| 53  | 59  | IIFWHLRKVS NA | NA |
| 35  | 48  | CIFWHLRSVF NA | NA |
| 48  | 66  | IAFSQLTDKL NA | NA |
| 31  | 35  | IAFSQLRMIG NA | NA |
| 65  | 68  | IAFSQLYKKL NA | NA |
| 23  | 25  | IAFSQLTGGG NA | NA |
| 28  | 26  | IAFSQLYMPH NA | NA |
| 65  | 60  | IAFSQLQYPW NA | NA |
| 39  | 38  | FRYRSLYSRY NA | NA |
| 70  | 91  | HQYRSLYSRR NA | NA |
| 41  | 55  | KWYRSLYSSI NA | NA |
| 48  | 52  | GFYRSLYSRF NA | NA |
| 56  | 78  | WTYRSLYSGV NA | NA |
| 99  | 116 | MNYRSLYSMW NA | NA |
| 39  | 50  | GYRSLYSVH NA  | NA |
| 130 | 113 | LSYRSLYSGW NA | NA |
| 34  | 53  | RAYRSLYSWH NA | NA |
| 10  | 11  | NSYRSLYSMS NA | NA |
| 57  | 81  | FSLRQMWQQY NA | NA |
| 13  | 17  | FSLRQMVDVI NA | NA |
| 30  | 42  | FSLRQMQDNH NA | NA |
| 19  | 36  | FSLRQMYVEG NA | NA |
| 42  | 57  | FSLRQMMNTW NA | NA |
| 53  | 71  | YNWRHLQGKW NA | NA |
| 73  | 67  | YNWRHLMSSF NA | NA |
| 129 | 151 | YNWRHLRKRL NA | NA |
| 37  | 41  | YNWRHLKVTW NA | NA |
| 122 | 180 | NMWAHLHMMK NA | NA |
| 128 | 159 | NMWAHLKQIH NA | NA |
| 51  | 53  | NMWAHLTSKL NA | NA |
| 79  | 85  | NMWAHLHSAG NA | NA |
| 71  | 64  | NMWAHLWALQ NA | NA |
| 67  | 78  | LPYFSMWGGY NA | NA |
| 55  | 74  | LPYFSMASSW NA | NA |
| 50  | 54  | LPYFSMAVMV NA | NA |
| 29  | 42  | LPYFSMQVQR NA | NA |
| 14  | 28  | LPYFSMAAQI NA | NA |

|     |     |               |    |
|-----|-----|---------------|----|
| 76  | 107 | TRLAHVWVHG NA | NA |
| 6   | 8   | WRYSNLMQIF NA | NA |
| 40  | 46  | WRYSNLWDHQ NA | NA |
| 21  | 24  | WRYSNLARWF NA | NA |
| 12  | 10  | WRYSNLMVSR NA | NA |
| 10  | 14  | WRYSNLMNKY NA | NA |
| 18  | 29  | WRYSNLMGWS NA | NA |
| 22  | 44  | WRYSNLWDEG NA | NA |
| 97  | 110 | CKYRSLTLEQ NA | NA |
| 87  | 105 | HMYRSLTLKL NA | NA |
| 46  | 51  | IFYRSLTLNL NA | NA |
| 30  | 49  | CPYRSLTLKY NA | NA |
| 28  | 24  | DHYRSLTLQY NA | NA |
| 48  | 74  | EAYRSLTLSK NA | NA |
| 88  | 97  | ENYRSLTLWW NA | NA |
| 59  | 64  | WMYRSLTLKT NA | NA |
| 87  | 132 | KKYRSLTLAW NA | NA |
| 17  | 27  | DDYRSLTLQY NA | NA |
| 38  | 51  | GHFRHLIKVY NA | NA |
| 35  | 63  | YWFRHLIKVY NA | NA |
| 52  | 53  | VLPRSWALMQ NA | NA |
| 41  | 80  | VLPRSWQGTQ NA | NA |
| 28  | 40  | VLPRSWKQVI NA | NA |
| 126 | 160 | VLPRSWKLSL NA | NA |
| 32  | 42  | VLPRSWQLG NA  | NA |
| 33  | 30  | VLPRSWKVNG NA | NA |
| 77  | 88  | RGPYHLMMMG NA | NA |
| 17  | 29  | RGPYHLQQIS NA | NA |
| 103 | 120 | RGPYHLMVQR NA | NA |
| 85  | 92  | RGPYHMLLVR NA | NA |
| 81  | 89  | RMLAQLWMHL NA | NA |
| 46  | 57  | VEFRSMRNLN NA | NA |
| 91  | 83  | HEFRSMRDGK NA | NA |
| 20  | 34  | DEFRSMRGVS NA | NA |
| 54  | 76  | QEFRSMRMGV NA | NA |
| 63  | 82  | QEFRSMRYVK NA | NA |
| 33  | 47  | MEFRSMRQPK NA | NA |
| 49  | 76  | VEFRSMRGQV NA | NA |
| 75  | 92  | HEFRSMRYPR NA | NA |
| 54  | 61  | REFRSMRAEK NA | NA |
| 50  | 54  | LLFSQLQNQG NA | NA |

|     |                   |    |
|-----|-------------------|----|
| 33  | 43 LLFSQLRQKS NA  | NA |
| 23  | 26 LLFSQLYSNG NA  | NA |
| 39  | 35 LLFSQLYNLW NA  | NA |
| 26  | 39 ISASHMTLKF NA  | NA |
| 109 | 110 NASHMTLTH NA  | NA |
| 33  | 44 NPASHMTLVQ NA  | NA |
| 41  | 40 NKASHMTLNF NA  | NA |
| 52  | 56 LPASHMTLRY NA  | NA |
| 64  | 90 RYASHMTLTR NA  | NA |
| 67  | 80 WWASHMTLES NA  | NA |
| 34  | 39 EMASHMTLTI NA  | NA |
| 45  | 51 PQVWYLLWLQL NA | NA |
| 37  | 31 GQYASMVAMT NA  | NA |
| 67  | 55 IYASMVAAQ NA   | NA |
| 70  | 97 YHYASMVAPL NA  | NA |
| 37  | 41 LQYASMVASF NA  | NA |
| 44  | 62 VNYASMVATV NA  | NA |
| 47  | 74 QDYASMVAHK NA  | NA |
| 104 | 115 MNYASMVAMH NA | NA |
| 110 | 155 GHYASMVAHV NA | NA |
| 39  | 33 GIYASMVAVK NA  | NA |
| 58  | 82 MNWESLKGQG NA  | NA |
| 110 | 144 MNWESLQVRL NA | NA |
| 39  | 33 IFLRHLSNNF NA  | NA |
| 2   | 1 VSLRHLSNII NA   | NA |
| 59  | 84 KSLRHLSNHW NA  | NA |
| 39  | 35 VMLRHLSNQA NA  | NA |
| 55  | 88 KTLRHLSNGW NA  | NA |
| 46  | 98 VFLRHLSNRW NA  | NA |
| 54  | 65 LDLRHLSNMA NA  | NA |
| 20  | 15 GKLRHLSNKQ NA  | NA |
| 19  | 20 DQLRHLSNTG NA  | NA |
| 88  | 68 AGVRYLTRQR NA  | NA |
| 46  | 52 AGVRYLTGGL NA  | NA |
| 133 | 169 AGVRYLWSHG NA | NA |
| 22  | 29 PRLTHLYKRK NA  | NA |
| 44  | 42 PRLTHLMDVT NA  | NA |
| 43  | 47 PRLTHLMGRI NA  | NA |
| 56  | 68 PRLTHLRLTQ NA  | NA |
| 47  | 56 PRLTHLTMGA NA  | NA |
| 37  | 27 PRLTHLQMAT NA  | NA |

|     |     |                |    |
|-----|-----|----------------|----|
| 17  | 27  | PRLTHLAQIG NA  | NA |
| 35  | 33  | PRLTHLWSPL NA  | NA |
| 38  | 52  | SRYLPMYSAG NA  | NA |
| 34  | 44  | SRYLPMWMIV NA  | NA |
| 18  | 30  | SRYLPMQMHA NA  | NA |
| 29  | 43  | SRYLPMQDAQ NA  | NA |
| 60  | 58  | PIALHWQDAF NA  | NA |
| 80  | 91  | PIALHWWRIV NA  | NA |
| 80  | 70  | PIALHWMDPG NA  | NA |
| 54  | 73  | PIALHWAMLS NA  | NA |
| 58  | 47  | PIALHWSQAA NA  | NA |
| 48  | 47  | PIALHWANNS NA  | NA |
| 39  | 61  | PIALHWKDGG NA  | NA |
| 58  | 98  | NNFQHLLRVHY NA | NA |
| 111 | 145 | DNWQHLLRVHR NA | NA |
| 90  | 106 | IRFQHLLRVHH NA | NA |
| 91  | 90  | GRWSNLMRKQ NA  | NA |
| 87  | 117 | YWSNLMRGGH NA  | NA |
| 36  | 48  | PAWSNLMRWL NA  | NA |
| 66  | 64  | ATWSNLMREL NA  | NA |
| 86  | 93  | VQWSNLMRLL NA  | NA |
| 100 | 118 | PWWSNLMRTH NA  | NA |
| 150 | 178 | DDWSNLMRKW NA  | NA |
| 50  | 69  | TWWSNLMRPT NA  | NA |
| 143 | 190 | HHWSNLMRAL NA  | NA |
| 22  | 31  | ISVWHVRKGS NA  | NA |
| 97  | 119 | GSVWHVRRWH NA  | NA |
| 79  | 81  | SSVWHVRLLS NA  | NA |
| 59  | 84  | MSVWHVRQVI NA  | NA |
| 61  | 102 | NSVWHVRLSK NA  | NA |
| 74  | 93  | DSVWHVRKGGH NA | NA |
| 73  | 91  | LSVWHVRGMH NA  | NA |
| 147 | 181 | ASVWHVRVVH NA  | NA |
| 72  | 76  | WSVWHVRQVL NA  | NA |
| 80  | 87  | VRVLHLWRPV NA  | NA |
| 17  | 27  | VRVLHLTGSI NA  | NA |
| 25  | 38  | AMPLHMTNMH NA  | NA |
| 94  | 116 | SIVRMLKMWK NA  | NA |
| 38  | 59  | SIVRMLMSLI NA  | NA |
| 38  | 37  | RILGYLWAKL NA  | NA |
| 55  | 57  | MYFGNLRGVQ NA  | NA |

|     |                    |    |
|-----|--------------------|----|
| 18  | 14 SYFGNLRQNI NA   | NA |
| 54  | 75 EYFGNLRGNW NA   | NA |
| 34  | 39 NYFGNLRVLQ NA   | NA |
| 72  | 56 DYFGNLRVGQ NA   | NA |
| 41  | 49 KYFGNLRVSH NA   | NA |
| 76  | 71 NYFGNLRMRT NA   | NA |
| 92  | 72 QYFGNLRVHI NA   | NA |
| 99  | 112 HYFGNLRRAEL NA | NA |
| 43  | 52 VSLAYLWNEI NA   | NA |
| 28  | 46 AHYASLQMLS NA   | NA |
| 14  | 15 GHFVMLKLQP NA   | NA |
| 35  | 42 PGPESLYRAI NA   | NA |
| 9   | 8 ISHSNLMNGR NA    | NA |
| 40  | 39 CSHSNLMMLS NA   | NA |
| 21  | 26 TSHSNLMKQS NA   | NA |
| 22  | 29 TSHSNLMQAR NA   | NA |
| 41  | 48 TSHSNLMVRH NA   | NA |
| 8   | 8 ISHSNLMSSK NA    | NA |
| 13  | 20 TSHSNLMYGT NA   | NA |
| 11  | 17 SSHSNLMAMY NA   | NA |
| 19  | 29 GSHSNLMDIY NA   | NA |
| 50  | 53 QSHSNLMATV NA   | NA |
| 83  | 74 DPYFSLRTWG NA   | NA |
| 13  | 15 YIWFSLRTWY NA   | NA |
| 33  | 35 SMWFSLRTWW NA   | NA |
| 30  | 40 IKFFSLRTWT NA   | NA |
| 34  | 56 NWYFSLRTWY NA   | NA |
| 48  | 66 QKVLNMMGHT NA   | NA |
| 13  | 18 STFVALQRLP NA   | NA |
| 23  | 35 TAFGALQRLP NA   | NA |
| 130 | 149 PNWQALRVQL NA  | NA |
| 98  | 110 PNYKALRVQL NA  | NA |
| 71  | 83 YMGIALTMPL NA   | NA |
| 61  | 58 ESHAALTMPL NA   | NA |
| 51  | 61 DNYSALTMPL NA   | NA |
| 54  | 76 WPYSALTMPL NA   | NA |
| 53  | 68 FMMGNMWQEK NA   | NA |
| 67  | 68 WHFGALTRMK NA   | NA |
| 35  | 46 WHFGALQMHF NA   | NA |
| 89  | 135 WHFGALTYAA NA  | NA |
| 47  | 42 YGASGLMVLL NA   | NA |

|    |                   |    |
|----|-------------------|----|
| 8  | 8 GGASGLMAPA NA   | NA |
| 45 | 45 EGASGLMYAY NA  | NA |
| 44 | 56 PGASGLMYER NA  | NA |
| 47 | 50 YGASGLMDHQ NA  | NA |
| 13 | 15 QGASGLMSSA NA  | NA |
| 34 | 63 PGASGLMQGT NA  | NA |
| 48 | 70 WGASGLMGGL NA  | NA |
| 40 | 33 PGASGLMNAK NA  | NA |
| 8  | 9 CAFSPLMLPF NA   | NA |
| 22 | 42 MQWQPLMLPF NA  | NA |
| 37 | 39 GMFRFLMSWM NA  | NA |
| 51 | 71 QQYYFLMSWM NA  | NA |
| 19 | 34 EFYWFLMSWM NA  | NA |
| 52 | 46 NNFSFLMSWM NA  | NA |
| 34 | 36 GNFVALQVPT NA  | NA |
| 58 | 65 IALLNMYIPS NA  | NA |
| 49 | 81 FRLLNMYIGT NA  | NA |
| 89 | 98 RHLLNMYIWH NA  | NA |
| 59 | 64 KFLLNMYIVK NA  | NA |
| 31 | 38 GDLLNMYIIS NA  | NA |
| 52 | 61 VHLLNMYIGS NA  | NA |
| 52 | 58 SPLLNMYIQH NA  | NA |
| 40 | 53 GALLNMYIRS NA  | NA |
| 53 | 67 LTLLNMYIAL NA  | NA |
| 16 | 9 LQLLNMYILV NA   | NA |
| 45 | 54 YMFQNLIIYWN NA | NA |
| 78 | 89 NMLYGLTLTQ NA  | NA |
| 14 | 23 VFLYGLTLLG NA  | NA |
| 12 | 9 IILYGLTLHK NA   | NA |
| 32 | 22 GFLYGLTLVG NA  | NA |
| 28 | 44 IWLYGLTLLT NA  | NA |
| 32 | 38 FTLYGLTLEL NA  | NA |
| 67 | 78 KKLYGLTLPL NA  | NA |
| 16 | 8 DFLYGLTLQT NA   | NA |
| 92 | 76 RKLYGLTLWV NA  | NA |
| 82 | 81 THLYGLTLTV NA  | NA |
| 37 | 52 TPLYGLTLSA NA  | NA |
| 61 | 65 PTWFQLRVFH NA  | NA |
| 4  | 13 SFYFQLRVFW NA  | NA |
| 34 | 52 GHWFQLRVFF NA  | NA |
| 57 | 54 YPFFQLRVFQ NA  | NA |



|     |                     |    |
|-----|---------------------|----|
| 44  | 50 QNFFQLRVFS NA    | NA |
| 40  | 50 TPVGWMYKSV NA    | NA |
| 20  | 28 TPVGWMQQTY NA    | NA |
| 59  | 71 HVLQNLMKGA NA    | NA |
| 76  | 93 HVLQNLWDGS NA    | NA |
| 70  | 82 VMLQNLMLRQ NA    | NA |
| 36  | 52 QNLQNLMLLW NA    | NA |
| 24  | 25 GDLQNLMLLG NA    | NA |
| 61  | 35 TQLQNLMLGL NA    | NA |
| 23  | 19 LYLQNLMLPG NA    | NA |
| 25  | 24 CSLQNLMLPL NA    | NA |
| 23  | 29 LWLQNLMLPI NA    | NA |
| 53  | 54 LPLQNLMLHG NA    | NA |
| 18  | 20 TAPINLQYGR NA    | NA |
| 30  | 42 RGMQNLWMNY NA    | NA |
| 24  | 20 RGMQNLWLIV NA    | NA |
| 33  | 46 RGMQNLWDMY NA    | NA |
| 29  | 41 NDFNFLRKML NA    | NA |
| 74  | 77 EQLANMRRER NA    | NA |
| 37  | 65 EQLANMRGNW NA    | NA |
| 69  | 75 EQLANMAGIR NA    | NA |
| 58  | 89 EQLANMQMGW NA    | NA |
| 58  | 53 EQLANMYKWI NA    | NA |
| 43  | 49 PVLFHLSQHS NA    | NA |
| 59  | 84 GVLFHLSALF NA    | NA |
| 39  | 37 LVLFHLSSQL NA    | NA |
| 26  | 19 MVLFHLSSSH NA    | NA |
| 46  | 45 IVLFHLSYGW NA    | NA |
| 24  | 33 VVLFHLSKKI NA    | NA |
| 18  | 34 KVLFHLSNKG NA    | NA |
| 68  | 78 NVLFHLSVMT NA    | NA |
| 111 | 135 QVLFHLSVHR NA   | NA |
| 62  | 80 VVLFHLSRGG NA    | NA |
| 47  | 62 RKALNLTQLV NA    | NA |
| 64  | 69 VDH AHLI LVK NA  | NA |
| 69  | 78 VDH AHLT SNR NA  | NA |
| 40  | 32 VDH AHLT LNF NA  | NA |
| 91  | 101 VDH AHLW SEV NA | NA |
| 15  | 20 DILRH LRVTF NA   | NA |
| 29  | 38 DILRH LRATY NA   | NA |
| 26  | 27 DILRH LAYSK NA   | NA |

|     |                   |    |
|-----|-------------------|----|
| 21  | 33 DILRHLQGKG NA  | NA |
| 2   | 6 DILRHLKGVV NA   | NA |
| 54  | 56 DILRHLTNMH NA  | NA |
| 18  | 32 RTYSHLKNLR NA  | NA |
| 7   | 8 RTYSHLYSSS NA   | NA |
| 147 | 184 RTYSHLWVHR NA | NA |
| 44  | 60 RTYSHLTDGY NA  | NA |
| 31  | 42 RTYSHLTNEV NA  | NA |
| 77  | 80 RTYSHLAGGH NA  | NA |
| 30  | 43 RTYSHLAGSA NA  | NA |
| 91  | 104 RTYSHLWMTA NA | NA |
| 63  | 72 HLVAWLTSSF NA  | NA |
| 53  | 55 GFARNLMATQ NA  | NA |
| 58  | 65 FTARNLMAEK NA  | NA |
| 62  | 62 TFARNLMAHK NA  | NA |
| 69  | 89 MSARNLMAPV NA  | NA |
| 90  | 93 PKARNLMANL NA  | NA |
| 42  | 75 TFARNLMAVH NA  | NA |
| 26  | 42 PPARNLMAER NA  | NA |
| 42  | 55 WNARNLMAPF NA  | NA |
| 47  | 58 IIARNLMAIS NA  | NA |
| 68  | 81 HNARNLMASY NA  | NA |
| 31  | 42 HRARNLMAIT NA  | NA |
| 58  | 74 SLYRALYNVG NA  | NA |
| 81  | 96 SLYRALYRVT NA  | NA |
| 36  | 54 ELYASLWRES NA  | NA |
| 46  | 52 ELYASLWNWR NA  | NA |
| 49  | 75 ELYASLTAMY NA  | NA |
| 51  | 56 ELYASLYVQL NA  | NA |
| 49  | 72 ELYASLWNRI NA  | NA |
| 37  | 26 MAYQSLWAAI NA  | NA |
| 28  | 56 MAYQSLWGTG NA  | NA |
| 42  | 52 MAYQSLWYGV NA  | NA |
| 31  | 36 MAYQSLMMER NA  | NA |
| 38  | 46 MAYQSLWGNW NA  | NA |
| 42  | 52 MAYQSLWGTW NA  | NA |
| 20  | 20 VFALNLTNGQ NA  | NA |
| 28  | 37 VFALNLTKAW NA  | NA |
| 42  | 59 YFARQLMAKA NA  | NA |
| 62  | 69 YFARQLQVQW NA  | NA |
| 19  | 27 YFARQLQMPA NA  | NA |

|     |                     |    |
|-----|---------------------|----|
| 22  | 22 NFG RPLMSNG NA   | NA |
| 47  | 36 NFG RPLTSGT NA   | NA |
| 79  | 93 NFG RPLSQWH NA   | NA |
| 52  | 73 NFG RPLWVKK NA   | NA |
| 24  | 22 DVA FHLTLMH NA   | NA |
| 59  | 74 AIY RSMRGQV NA   | NA |
| 44  | 47 AIY RSMIYRG NA   | NA |
| 64  | 72 AIY RSMADWA NA   | NA |
| 25  | 35 AIY RSMYDGY NA   | NA |
| 52  | 69 AIY RSMTLTQ NA   | NA |
| 48  | 62 AIY RSMWDRF NA   | NA |
| 18  | 36 FFW ASMRL ET NA  | NA |
| 49  | 68 ENW ASMRLI W NA  | NA |
| 120 | 133 YPW ASMRLI W NA | NA |
| 227 | 248 YHW ASMRLTV NA  | NA |
| 82  | 111 IQW ASMRLRK NA  | NA |
| 28  | 32 PIW ASMRLNS NA   | NA |
| 109 | 113 QSW ASMRLLR NA  | NA |
| 136 | 131 KTW ASMRLGW NA  | NA |
| 84  | 90 GNW ASMRLPW NA   | NA |
| 113 | 158 PHW ASMRLWA NA  | NA |
| 53  | 63 RPW ASMRLIY NA   | NA |
| 18  | 31 QAA FHLTSGY NA   | NA |
| 53  | 53 QAA FHLSDTK NA   | NA |
| 72  | 82 YKAWNMRVAR NA    | NA |
| 33  | 39 PIAWNMRVGG NA    | NA |
| 62  | 79 MNAWNMRVTF NA    | NA |
| 90  | 80 RQAWNMRVVT NA    | NA |
| 61  | 71 IDAWNMRVWT NA    | NA |
| 58  | 75 CDAWNMRVPQ NA    | NA |
| 63  | 79 FHAWNMRVRS NA    | NA |
| 86  | 86 CRAWNMRVQQ NA    | NA |
| 43  | 60 HWAWNMRVVK NA    | NA |
| 5   | 7 LRAWNMRVKG NA     | NA |
| 47  | 57 TVLRSLWNQT NA    | NA |
| 70  | 64 TVLRSLYLTA NA    | NA |
| 55  | 60 TVLRSLYMNA NA    | NA |
| 48  | 38 TVLRSLYVTG NA    | NA |
| 37  | 62 GMVLNLMLIK NA    | NA |
| 26  | 31 GMVLNLMDQA NA    | NA |
| 112 | 159 PSPLSWRNLG NA   | NA |

|     |     |                |    |
|-----|-----|----------------|----|
| 53  | 45  | YSPLSWRSII NA  | NA |
| 101 | 86  | MSPLSWRQEA NA  | NA |
| 167 | 244 | MSPLSWRSRL NA  | NA |
| 101 | 113 | CSPLSWRVGH NA  | NA |
| 97  | 96  | SSPLSWRVIF NA  | NA |
| 72  | 105 | QSPLSWRRKG NA  | NA |
| 120 | 148 | YSPLSWRLIQ NA  | NA |
| 107 | 154 | YSPLSWRYGA NA  | NA |
| 84  | 111 | PSPLSWRNLY NA  | NA |
| 158 | 211 | HSPLSWRQWL NA  | NA |
| 49  | 44  | STVRNLMQLR NA  | NA |
| 52  | 67  | STVRNLMGEV NA  | NA |
| 15  | 31  | VQLRSLQSAF NA  | NA |
| 10  | 11  | VQLRSLTISIS NA | NA |
| 40  | 43  | VQLRSLWKMA NA  | NA |
| 64  | 69  | VQLRSLWSWS NA  | NA |
| 206 | 254 | GHYAHMRVGL NA  | NA |
| 188 | 204 | NPYAHMRVHY NA  | NA |
| 69  | 108 | LQYAHMRVGS NA  | NA |
| 130 | 160 | FMYAHMRVHI NA  | NA |
| 106 | 120 | IFYAHMRVNV NA  | NA |
| 115 | 142 | TMYAHMRVNT NA  | NA |
| 62  | 100 | PDYAHMRVKK NA  | NA |
| 77  | 90  | ATYAHMRVSK NA  | NA |
| 190 | 212 | EPYAHMRVGR NA  | NA |
| 203 | 222 | VWYAHMRVHF NA  | NA |
| 142 | 150 | HSYAHMRVRG NA  | NA |
| 31  | 39  | LPALNMTGQA NA  | NA |
| 45  | 82  | WNWQGLKVRR NA  | NA |
| 19  | 21  | IGYAWMMGMI NA  | NA |
| 26  | 27  | IGYAWMMVEG NA  | NA |
| 36  | 57  | IGYAWMYLTR NA  | NA |
| 24  | 38  | IGYAWMIAMA NA  | NA |
| 28  | 27  | IGYAWMVQWK NA  | NA |
| 35  | 46  | IGYAWMVNEH NA  | NA |
| 65  | 71  | IGYAWMTDNA NA  | NA |
| 54  | 70  | GRVWHLQMQG NA  | NA |
| 73  | 88  | MRVWHLQATQ NA  | NA |
| 59  | 73  | DRVWHLQGRS NA  | NA |
| 33  | 49  | VRVWHLQDVR NA  | NA |
| 24  | 21  | FRVWHLQDGT NA  | NA |

|     |     |                |    |
|-----|-----|----------------|----|
| 34  | 29  | LRVWHLQVVG NA  | NA |
| 52  | 71  | GRVWHLQGAY NA  | NA |
| 32  | 49  | FRVWHLQKQR NA  | NA |
| 12  | 22  | QRVWHLQGWI NA  | NA |
| 3   | 12  | FRVWHLQQMA NA  | NA |
| 68  | 75  | SSYAHLMVRV NA  | NA |
| 40  | 48  | SSYAHLTGHH NA  | NA |
| 65  | 57  | SSYAHLWVII NA  | NA |
| 27  | 30  | SSYAHLWGSQ NA  | NA |
| 76  | 91  | SSYAHLWMAY NA  | NA |
| 65  | 86  | SSYAHLTRRV NA  | NA |
| 24  | 31  | SSYAHLYNWV NA  | NA |
| 23  | 32  | VFYQSLTKGQ NA  | NA |
| 47  | 48  | VFYQSLYNPV NA  | NA |
| 49  | 41  | PMARYLSMKG NA  | NA |
| 73  | 90  | PMARYLWYMQ NA  | NA |
| 98  | 130 | PMARYLWQPQ NA  | NA |
| 73  | 91  | PMARYLWQAS NA  | NA |
| 87  | 99  | QKYSNLMGGV NA  | NA |
| 52  | 80  | QKYSNLHGHR NA  | NA |
| 26  | 37  | QKYSNLQSEW NA  | NA |
| 33  | 44  | QKYSNLSDOI NA  | NA |
| 62  | 72  | QKYSNLKNVK NA  | NA |
| 47  | 61  | QKYSNLFQGH NA  | NA |
| 57  | 66  | QKYSNLSYGV NA  | NA |
| 43  | 33  | QKYSNLTNKI NA  | NA |
| 93  | 112 | QKYSNLRKGQ NA  | NA |
| 50  | 55  | TRPQHLWGGL NA  | NA |
| 45  | 43  | TRPQHLWMGG NA  | NA |
| 79  | 59  | TRPQHLLTSSR NA | NA |
| 32  | 42  | TRPQHLMGSG NA  | NA |
| 70  | 67  | SMYRFMTLTW NA  | NA |
| 63  | 73  | TWYRFMTLGT NA  | NA |
| 102 | 147 | DHYRFMTLGG NA  | NA |
| 71  | 80  | SWYRFMTLPS NA  | NA |
| 57  | 64  | CNYRFMTLVS NA  | NA |
| 96  | 117 | YQYRFMTLKW NA  | NA |
| 29  | 52  | GHYRFMTLVS NA  | NA |
| 67  | 82  | EWYRFMTLKQ NA  | NA |
| 49  | 55  | ENYRFMTLLL NA  | NA |
| 52  | 44  | WYRFMTLAA NA   | NA |

|     |                   |    |
|-----|-------------------|----|
| 83  | 71 MNYRFMTLAG NA  | NA |
| 67  | 81 SRVRNLMVNV NA  | NA |
| 61  | 104 GAWQGLRMGT NA | NA |
| 75  | 78 WPVASLMGWI NA  | NA |
| 34  | 39 GFVASLMGVW NA  | NA |
| 52  | 71 YFVASLMGGV NA  | NA |
| 62  | 64 KNVASLMGLA NA  | NA |
| 34  | 46 QAVASLMGHT NA  | NA |
| 76  | 89 SWVASLMGGQ NA  | NA |
| 51  | 56 FRVASLMGQS NA  | NA |
| 100 | 95 HQVASLMGKH NA  | NA |
| 45  | 66 NYVASLMGKL NA  | NA |
| 48  | 67 RDVASLMGGF NA  | NA |
| 73  | 121 HLFQWLWKEK NA | NA |
| 40  | 60 HLFQWLQYPY NA  | NA |
| 76  | 95 HLFQWLTQSW NA  | NA |
| 63  | 79 HLFQWLTVLR NA  | NA |
| 42  | 62 HLFQWLTQYQF NA | NA |
| 91  | 90 HLFQWLYKSH NA  | NA |
| 47  | 44 MVVRHLTVKL NA  | NA |
| 70  | 62 MVVRHLTKNW NA  | NA |
| 79  | 106 MVVRHLMRNA NA | NA |
| 58  | 66 KSPRMLKRLQ NA  | NA |
| 33  | 26 KSPRMLQDQG NA  | NA |
| 10  | 13 ARAQHITKSS NA  | NA |
| 67  | 74 LGWSSLWGPH NA  | NA |
| 50  | 70 LGWSSLSRWH NA  | NA |
| 19  | 22 LGWSSLTSVK NA  | NA |
| 50  | 54 NTFHLHLAREW NA | NA |
| 35  | 62 NTFHLHLYRAG NA | NA |
| 15  | 26 NTFHLHLQSGI NA | NA |
| 43  | 44 NTFHLHLWVNA NA | NA |
| 28  | 28 NTFHLHLKAMQ NA | NA |
| 33  | 47 PYAENLKKTL NA  | NA |
| 50  | 39 PYAENLMDNA NA  | NA |
| 58  | 76 PYAENLWSIQ NA  | NA |
| 35  | 52 PYAENLMSGG NA  | NA |
| 31  | 60 PYAENLTAII NA  | NA |
| 129 | 144 WLYAHYTGRS NA | NA |
| 84  | 95 WLYAHYMGAI NA  | NA |
| 105 | 117 WLYAHYMRTG NA | NA |

|     |                     |    |
|-----|---------------------|----|
| 72  | 81 WLYAHYTKAT NA    | NA |
| 53  | 87 ERLHHLTAGT NA    | NA |
| 62  | 110 ERLHHLSLVL NA   | NA |
| 137 | 168 ERLHHLRAR NA    | NA |
| 96  | 110 ERLHHLSSRS NA   | NA |
| 70  | 98 VMHQNLRGHT NA    | NA |
| 12  | 16 VMHQNLRGER NA    | NA |
| 35  | 51 VMHQNLRQA NA     | NA |
| 62  | 72 MDLHSLWNA NA     | NA |
| 47  | 64 FMYSHLSLEF NA    | NA |
| 0   | 1 FMYSHLRVA NA      | NA |
| 136 | 144 FMYSHLRKNKL NA  | NA |
| 97  | 131 FMYSHLRMGSQ NA  | NA |
| 17  | 17 FMYSHLRKGPR NA   | NA |
| 60  | 86 TSGRNLRTAGI NA   | NA |
| 27  | 21 EIGNLRNTATK NA   | NA |
| 16  | 41 VDGRNLRNTAGA NA  | NA |
| 47  | 39 YDGRNLRNTAEW NA  | NA |
| 38  | 43 GYGRNLRNTASG NA  | NA |
| 45  | 31 QYGRNLRNTAVK NA  | NA |
| 152 | 202 RRGRNLRNTAWI NA | NA |
| 63  | 77 WNGRNLRNTALV NA  | NA |
| 47  | 53 PFGRNLRNTAQH NA  | NA |
| 85  | 103 CHGRNLRNTAIY NA | NA |
| 42  | 58 ELAWHLRQKWW NA   | NA |
| 85  | 110 ELAWHLRTRGR NA  | NA |
| 125 | 151 ELAWHLRMOQL NA  | NA |
| 25  | 50 ELAWHLRQDLQ NA   | NA |
| 39  | 43 VKVWGLRTARV NA   | NA |
| 59  | 63 VKVWGLRKRMF NA   | NA |
| 68  | 69 YPFKALRSRF NA    | NA |
| 52  | 56 EAFWAYRMTVA NA   | NA |
| 36  | 47 QPYGNLRNTFLA NA  | NA |
| 155 | 180 HHWSNLRNTFLA NA | NA |
| 12  | 22 KYGSNLRNTFLA NA  | NA |
| 64  | 78 QDFYALHRPG NA    | NA |
| 123 | 146 YYASHLRWGLF NA  | NA |
| 40  | 44 YYASHLRTRPT NA   | NA |
| 45  | 53 YYASHLRTOQS NA   | NA |
| 77  | 105 YYASHLRWSSG NA  | NA |
| 27  | 36 VYSAYLRWASY NA   | NA |

|     |                    |    |
|-----|--------------------|----|
| 15  | 18 FWWFQLFNVG NA   | NA |
| 202 | 257 TWAKMLRRRAW NA | NA |
| 67  | 84 PMFGPLRARL NA   | NA |
| 212 | 251 FIHYPLRARL NA  | NA |
| 230 | 272 KYHAWMAAQI NA  | NA |
| 214 | 269 KYHAWMSALI NA  | NA |
| 133 | 155 KYHAWMYGQT NA  | NA |
| 134 | 151 KYHAWMLRWR NA  | NA |
| 221 | 301 KYHAWMFAWG NA  | NA |
| 152 | 216 KYHAWMFGGY NA  | NA |
| 475 | 590 KYHAWMHNMK NA  | NA |
| 41  | 65 VFPQGMRYSF NA   | NA |
| 45  | 40 VFPQGMLLRH NA   | NA |
| 30  | 30 VFPQGMAQQG NA   | NA |
| 106 | 116 NSPMSLRYAH NA  | NA |
| 86  | 104 ESIRGLHGQW NA  | NA |
| 29  | 30 NAPNALKAMV NA   | NA |
| 10  | 8 MGLANLHGAA NA    | NA |
| 23  | 36 MGLANLHDTF NA   | NA |
| 77  | 103 QSVAWLKHRL NA  | NA |
| 79  | 88 PWVAWLKHQS NA   | NA |
| 26  | 35 YMVAWLKHLY NA   | NA |
| 82  | 107 DKVAWLKHIF NA  | NA |
| 67  | 81 YTVAWLKHVI NA   | NA |
| 85  | 110 HMVAWLKHPK NA  | NA |
| 87  | 101 DNVAWLKHMW NA  | NA |
| 61  | 106 LRVAWLKHPL NA  | NA |
| 66  | 73 PQVAWLKHIW NA   | NA |
| 51  | 64 DQVAWLKHNT NA   | NA |
| 41  | 56 MWVAWLKHVI NA   | NA |
| 6   | 12 KRLAFLKVT NA    | NA |
| 35  | 41 KRLAFLQVK NA    | NA |
| 75  | 73 RVVANLHAWQ NA   | NA |
| 68  | 86 RVVANLRSSW NA   | NA |
| 68  | 79 RVVANLRSHG NA   | NA |
| 24  | 23 RVVANLADKY NA   | NA |
| 56  | 56 RVVANLRNRT NA   | NA |
| 32  | 28 KQLASLHGVI NA   | NA |
| 42  | 57 KQLASLHNGF NA   | NA |
| 81  | 73 PSHAALRGAL NA   | NA |
| 199 | 254 PSHAALRSMW NA  | NA |



|     |     |               |    |
|-----|-----|---------------|----|
| 119 | 149 | MSHAALRVEY NA | NA |
| 175 | 247 | SSHAALRALK NA | NA |
| 327 | 411 | TSHAALRRLA NA | NA |
| 84  | 97  | VSHAALRRKK NA | NA |
| 203 | 301 | GSHAALRQRY NA | NA |
| 173 | 224 | FSHAALRAPL NA | NA |
| 85  | 102 | QSHAALRVAI NA | NA |
| 301 | 379 | MSHAALRSGK NA | NA |
| 47  | 54  | MWVLSLANTG NA | NA |
| 100 | 104 | MWVLSLRQSL NA | NA |
| 89  | 106 | MWVLSLKDAK NA | NA |
| 38  | 41  | MWVLSLFYPW NA | NA |
| 140 | 168 | WAINALRGLR NA | NA |
| 31  | 37  | FKAVALAGGA NA | NA |
| 142 | 161 | FKAVALRSWQ NA | NA |
| 36  | 44  | FKAVALKYGG NA | NA |
| 110 | 147 | FKAVALRNWL NA | NA |
| 258 | 287 | FKAVALLARW NA | NA |
| 49  | 45  | IFARSLSQTK NA | NA |
| 105 | 144 | IFARSLKQLS NA | NA |
| 130 | 162 | IFARSLKVTW NA | NA |
| 28  | 39  | IFARSLSDKG NA | NA |
| 68  | 58  | IFARSLFGWK NA | NA |
| 56  | 80  | IFARSLSKMA NA | NA |
| 67  | 82  | IFARSLSLVH NA | NA |
| 65  | 90  | IFARSLASSH NA | NA |
| 78  | 124 | IFARSLKSTT NA | NA |
| 41  | 57  | IFARSLMVIW NA | NA |
| 33  | 31  | PKLAAIHKEI NA | NA |
| 63  | 107 | PKLAAIHMSA NA | NA |
| 50  | 57  | PKLAAIHRAT NA | NA |
| 84  | 111 | ALARALKGWG NA | NA |
| 241 | 312 | NLARALKVWG NA | NA |
| 100 | 141 | CLARALKYTH NA | NA |
| 135 | 167 | QLARALKGWT NA | NA |
| 80  | 152 | TLARALKMMA NA | NA |
| 225 | 284 | WLARALKANY NA | NA |
| 407 | 551 | FLARALKSML NA | NA |
| 116 | 119 | NLARALKQTI NA | NA |
| 112 | 124 | SLARALKKMG NA | NA |
| 108 | 135 | FLARALKNSW NA | NA |

|     |     |               |    |
|-----|-----|---------------|----|
| 255 | 307 | VLARALKNGR NA | NA |
| 29  | 42  | WDIRSLKKKF NA | NA |
| 88  | 105 | WDIRSLRQSV NA | NA |
| 107 | 139 | WDIRSLKLRI NA | NA |
| 35  | 56  | WDIRSLAKTV NA | NA |
| 58  | 73  | WDIRSLMGEG NA | NA |
| 37  | 59  | WDIRSLAGSY NA | NA |
| 51  | 56  | WDIRSLKAQI NA | NA |
| 61  | 65  | WDIRSLHQTV NA | NA |
| 49  | 69  | IGVRALKYMV NA | NA |
| 52  | 77  | IGVRALKKGI NA | NA |
| 38  | 44  | IGVRALKMSH NA | NA |
| 26  | 26  | STPRNIKLLR NA | NA |
| 50  | 48  | NTPRNIKKGK NA | NA |
| 6   | 16  | ATPRNIKKNS NA | NA |
| 44  | 46  | ITPRNIKGTG NA | NA |
| 68  | 84  | MTPRNIKQTL NA | NA |
| 35  | 38  | NTPRNIKGHR NA | NA |
| 38  | 46  | ITPRNIKMKT NA | NA |
| 40  | 40  | DTPRNIKQMY NA | NA |
| 78  | 92  | MTPRNIKYWR NA | NA |
| 24  | 23  | GTPRNIKGVY NA | NA |
| 11  | 20  | VGPAFLQNEV NA | NA |
| 28  | 24  | LIPAWLAGGG NA | NA |
| 8   | 9   | LIPAWLLQKK NA | NA |
| 14  | 21  | LIPAWLRSPI NA | NA |
| 53  | 46  | LIPAWLALPQ NA | NA |
| 15  | 19  | WGTLALADSI NA | NA |
| 24  | 34  | WGTLALAKMI NA | NA |
| 117 | 155 | WGTLALRRAA NA | NA |
| 42  | 41  | WGTLALLMEI NA | NA |
| 89  | 85  | WGTLALKQHY NA | NA |
| 49  | 48  | WGTLALKRQY NA | NA |
| 65  | 88  | WGTLALKRWF NA | NA |
| 29  | 31  | SDVRFLFNIG NA | NA |
| 56  | 77  | SDVRFLFLGR NA | NA |
| 20  | 13  | SDVRFLQGTK NA | NA |
| 58  | 71  | SDVRFLRKHT NA | NA |
| 15  | 8   | SDVRFLQNSG NA | NA |
| 11  | 28  | KAPAHLLGWQ NA | NA |
| 14  | 23  | KAPAHLLAQL NA | NA |

|    |     |            |    |    |
|----|-----|------------|----|----|
| 19 | 23  | KAPAHLRMN  | NA | NA |
| 40 | 42  | RLVNWMLKTQ | NA | NA |
| 63 | 80  | RLVNWMLGHH | NA | NA |
| 39 | 43  | VEAVAIASQG | NA | NA |
| 48 | 53  | VEAVAIQLET | NA | NA |
| 77 | 91  | VEAVAIQDPR | NA | NA |
| 85 | 82  | VEAVAILSMH | NA | NA |
| 43 | 52  | VEAVAIQLRK | NA | NA |
| 64 | 74  | VEAVAIRAIR | NA | NA |
| 40 | 53  | VEAVAIAGMR | NA | NA |
| 76 | 103 | SCVRMMFRLA | NA | NA |
| 25 | 19  | SCVRMMFAPQ | NA | NA |
| 75 | 107 | HTVRGLKRIR | NA | NA |
| 52 | 58  | IQVLSLQSAT | NA | NA |
| 72 | 82  | NMVLSLQSIF | NA | NA |
| 61 | 56  | HDVLSLQSAV | NA | NA |
| 55 | 49  | DMVLSLQSLV | NA | NA |
| 32 | 39  | TDVLSLQSNF | NA | NA |
| 40 | 50  | CSVLSLQSLA | NA | NA |
| 93 | 114 | HYVLSLQSHA | NA | NA |
| 32 | 49  | ATVLSLQSAA | NA | NA |
| 74 | 84  | CSVLSLQSMW | NA | NA |
| 39 | 52  | IRVLSLQSIF | NA | NA |
| 26 | 38  | GIVLSLQSSA | NA | NA |
| 52 | 32  | TLIRYLHSGK | NA | NA |
| 13 | 18  | GSPRFLLDTG | NA | NA |
| 42 | 59  | MPPRFLLDTG | NA | NA |
| 52 | 46  | LWPRFLLDPA | NA | NA |
| 15 | 23  | MAPRFLLDNF | NA | NA |
| 40 | 56  | NHPRFLLDQQ | NA | NA |
| 21 | 24  | SWPRFLLDAR | NA | NA |
| 23 | 33  | QKPRFLLDEI | NA | NA |
| 41 | 46  | KIPRFLLDLF | NA | NA |
| 26 | 25  | GDPRFLLDVG | NA | NA |
| 62 | 73  | KMPRFLLDVL | NA | NA |
| 65 | 57  | ATPRFLLDHS | NA | NA |
| 44 | 23  | YMPRSLKSHS | NA | NA |
| 33 | 59  | DAPRSLKSGY | NA | NA |
| 45 | 60  | PRPRSLKSGG | NA | NA |
| 12 | 24  | VMPRSLKSLQ | NA | NA |
| 57 | 67  | WTPRSLKSLG | NA | NA |

|     |     |               |    |
|-----|-----|---------------|----|
| 71  | 82  | CRPRSLKSVW NA | NA |
| 89  | 99  | GWPRSLKSAY NA | NA |
| 82  | 91  | SHPRSLKSKQ NA | NA |
| 36  | 53  | HHRSLKSSV NA  | NA |
| 67  | 73  | IMHRALKQEG NA | NA |
| 79  | 107 | IMHRALYKKR NA | NA |
| 331 | 374 | IMHRALRAAY NA | NA |
| 162 | 203 | IMHRALHSVG NA | NA |
| 385 | 473 | IMHRALRRRA NA | NA |
| 46  | 46  | IMHRALSSLH NA | NA |
| 55  | 84  | GFTRWLRNWI NA | NA |
| 12  | 9   | GFTRWLKDLQ NA | NA |
| 23  | 17  | GFTRWLASLY NA | NA |
| 138 | 140 | DSPLSLRNLW NA | NA |
| 57  | 46  | WQVRYLFNGK NA | NA |
| 60  | 76  | WQVRYLFRGA NA | NA |
| 65  | 78  | VVPNNLFAIK NA | NA |
| 49  | 51  | VVPNNLFGPT NA | NA |
| 46  | 49  | KFPASLQGGL NA | NA |
| 17  | 26  | KFPASLQRIR NA | NA |
| 61  | 91  | ESIRHLHGKY NA | NA |
| 87  | 94  | ESIRHLMDRG NA | NA |
| 46  | 45  | ESIRHLFASG NA | NA |
| 72  | 99  | ESIRHLLNGH NA | NA |
| 51  | 63  | ESIRHLFREH NA | NA |
| 48  | 46  | ESIRHLQVQL NA | NA |
| 63  | 103 | ESIRHLRMLG NA | NA |
| 138 | 144 | ESIRHLKRGW NA | NA |
| 59  | 77  | ESIRHLFVEH NA | NA |
| 100 | 126 | CRLLAMHVQS NA | NA |
| 85  | 92  | LRLLAMHSWI NA | NA |
| 50  | 63  | ERLLAMHGLG NA | NA |
| 87  | 124 | ERLLAMHKAK NA | NA |
| 125 | 175 | HRLLAMHMTV NA | NA |
| 46  | 55  | CRLLAMHLAG NA | NA |
| 171 | 216 | LRLLAMHSSH NA | NA |
| 78  | 92  | YRLLAMHRKA NA | NA |
| 65  | 118 | NRLLAMHDST NA | NA |
| 29  | 43  | LRLLAMHMMI NA | NA |
| 79  | 90  | ARLLAMHAWW NA | NA |
| 30  | 36  | RKARAMKWAY NA | NA |

|     |     |               |    |
|-----|-----|---------------|----|
| 86  | 106 | GDARAMKWGT NA | NA |
| 105 | 146 | KTARAMKWRW NA | NA |
| 88  | 102 | CFARAMKWGV NA | NA |
| 95  | 85  | SAARAMKWEH NA | NA |
| 113 | 154 | DKARAMKWHI NA | NA |
| 78  | 126 | KFARAMKWTG NA | NA |
| 343 | 371 | HQARAMKWGT NA | NA |
| 157 | 148 | DQARAMKWGV NA | NA |
| 71  | 88  | SKPNFLRQHY NA | NA |
| 50  | 53  | LSVFWLAMPS NA | NA |
| 90  | 94  | LSVFWLRYGS NA | NA |
| 80  | 74  | LSVFWLRYAH NA | NA |
| 134 | 189 | IGALALRKLH NA | NA |
| 143 | 176 | IGALALRMGL NA | NA |
| 13  | 12  | IGALALAGVV NA | NA |
| 48  | 59  | IGALALQVLY NA | NA |
| 27  | 38  | IGALALAKHI NA | NA |
| 189 | 230 | SLNRALARRO NA | NA |
| 39  | 55  | SLNRALLNIS NA | NA |
| 168 | 233 | SLNRALRYGH NA | NA |
| 51  | 70  | SLNRALLAQG NA | NA |
| 87  | 110 | VFTRNLMAVW NA | NA |
| 44  | 53  | KMARNLLWST NA | NA |
| 55  | 70  | GWARNLLWQG NA | NA |
| 27  | 36  | KTARNLLWIY NA | NA |
| 61  | 99  | DKARNLLWWT NA | NA |
| 36  | 62  | KYARNLLWSL NA | NA |
| 44  | 43  | YNARNLLWWL NA | NA |
| 61  | 74  | QSARNLLWHL NA | NA |
| 78  | 101 | SHARNLLWSV NA | NA |
| 25  | 49  | MAARNLLWVF NA | NA |
| 93  | 101 | CWARNLLWHA NA | NA |
| 23  | 55  | GSAVGLRGIH NA | NA |
| 30  | 55  | GSAVGLRLPI NA | NA |
| 50  | 61  | LSAVGLRDKF NA | NA |
| 50  | 69  | CSAVGLRLEQ NA | NA |
| 29  | 33  | GSAVGLRYMI NA | NA |
| 57  | 71  | YSAVGLRQEQ NA | NA |
| 113 | 130 | QSAVGLRRGG NA | NA |
| 37  | 65  | LSAVGLRYET NA | NA |
| 64  | 86  | PSAVGLRYEY NA | NA |

|     |     |                |    |
|-----|-----|----------------|----|
| 87  | 108 | LVGRALSGHG NA  | NA |
| 47  | 47  | LVGRALAVIS NA  | NA |
| 48  | 49  | LVGRALSATS NA  | NA |
| 51  | 57  | LVGRALMDKG NA  | NA |
| 65  | 75  | LVGRALMRVK NA  | NA |
| 18  | 21  | VMLRFLFGEA NA  | NA |
| 20  | 20  | VMLRFLFNRV NA  | NA |
| 33  | 21  | VMLRFLRLVR NA  | NA |
| 9   | 18  | VMLRFL LAPR NA | NA |
| 43  | 67  | VMLRFLFAHK NA  | NA |
| 50  | 53  | EVARPLSYKV NA  | NA |
| 67  | 81  | MVARPLSYQG NA  | NA |
| 64  | 82  | KVARPLSDVW NA  | NA |
| 62  | 78  | VVARPLSDEW NA  | NA |
| 120 | 134 | FVARPLSGHG NA  | NA |
| 119 | 138 | IVARPLSMAL NA  | NA |
| 52  | 55  | RVARPLSRQQ NA  | NA |
| 48  | 61  | PVARPLSRRG NA  | NA |
| 38  | 43  | HVARPLSGWF NA  | NA |
| 45  | 70  | RLANALLDLK NA  | NA |
| 62  | 57  | RLANALKGGT NA  | NA |
| 67  | 62  | RLANALLYPK NA  | NA |
| 100 | 136 | KLGRALHQNW NA  | NA |
| 108 | 154 | KLGRALMKWL NA  | NA |
| 34  | 62  | KLGRALAKNG NA  | NA |
| 170 | 253 | KLGRALHKGH NA  | NA |
| 78  | 86  | KLGRALKGST NA  | NA |
| 66  | 89  | KLGRALKGVF NA  | NA |
| 77  | 127 | KLGRALRYTL NA  | NA |
| 50  | 59  | SQPIHMLKSL NA  | NA |
| 28  | 44  | SRPRSMLNGG NA  | NA |
| 29  | 39  | YNPRSMLNQF NA  | NA |
| 84  | 99  | MWPRSMLNMT NA  | NA |
| 80  | 84  | WHPRSMLNIL NA  | NA |
| 21  | 21  | YKPRSMLNTG NA  | NA |
| 30  | 33  | VFPRSMLNTL NA  | NA |
| 25  | 23  | YPPRSMLNNG NA  | NA |
| 67  | 77  | WDPRSMLNTV NA  | NA |
| 85  | 97  | MTPRSMLNGK NA  | NA |
| 53  | 60  | GYPRSMLNWQ NA  | NA |
| 115 | 157 | HRHAHLHAIR NA  | NA |

|     |     |            |    |    |
|-----|-----|------------|----|----|
| 99  | 132 | HRHAHLRKK  | NA | NA |
| 107 | 139 | HRHAHLAYPI | NA | NA |
| 138 | 191 | HRHAHLSGWV | NA | NA |
| 10  | 18  | HRHAHLFLIY | NA | NA |
| 110 | 123 | HRHAHLSYMG | NA | NA |
| 132 | 162 | HRHAHLARLG | NA | NA |
| 39  | 23  | AVANSLKYNF | NA | NA |
| 24  | 30  | AVANSLKDIF | NA | NA |
| 23  | 18  | AVANSLKSHS | NA | NA |
| 32  | 44  | TTYMSLFMEF | NA | NA |
| 37  | 47  | TTYMSLYMEI | NA | NA |
| 29  | 44  | TTYMSLLALF | NA | NA |
| 22  | 26  | TTYMSLALWG | NA | NA |
| 28  | 44  | TTYMSLLGTT | NA | NA |
| 74  | 70  | TTYMSLQAHQ | NA | NA |
| 129 | 164 | PCHLALRNIL | NA | NA |
| 155 | 171 | PCHLALRRVQ | NA | NA |
| 28  | 33  | PCHLALSSGS | NA | NA |
| 45  | 65  | PCHLALMLNG | NA | NA |
| 88  | 94  | PCHLALKRVS | NA | NA |
| 64  | 98  | PCHLALYDSR | NA | NA |
| 78  | 91  | PCHLALRDGY | NA | NA |
| 104 | 110 | HRLLSLAQKQ | NA | NA |
| 87  | 89  | HRLLSLKRHH | NA | NA |
| 106 | 118 | HRLLSLRLLR | NA | NA |
| 88  | 122 | HRLLSLFGHR | NA | NA |
| 47  | 64  | EVARAMQGGT | NA | NA |
| 35  | 45  | EVARAMQLLW | NA | NA |
| 79  | 95  | EVARAMLQMY | NA | NA |
| 57  | 67  | EVARAMLGRT | NA | NA |
| 43  | 47  | EVARAMQDPK | NA | NA |
| 62  | 58  | NVYQGLRQKG | NA | NA |
| 68  | 73  | PVYQGLRMHK | NA | NA |
| 177 | 258 | WVYQGLRLRA | NA | NA |
| 134 | 165 | NVYQGLRYGL | NA | NA |
| 82  | 116 | DVYQGLRGHR | NA | NA |
| 73  | 98  | WVYQGLRQQA | NA | NA |
| 97  | 116 | TVYQGLRMGL | NA | NA |
| 50  | 65  | FVYQGLRQIH | NA | NA |
| 139 | 158 | EVYQGLRQHY | NA | NA |
| 47  | 70  | PVYQGLRMTH | NA | NA |

|     |     |                |    |
|-----|-----|----------------|----|
| 104 | 119 | CVYQGLRSSV NA  | NA |
| 20  | 20  | PTFAHLLVLQ NA  | NA |
| 98  | 119 | ELVRSLRAQY NA  | NA |
| 43  | 45  | ELVRSLLVVF NA  | NA |
| 29  | 33  | ELVRSLKGNG NA  | NA |
| 54  | 62  | ELVRSLKGNK NA  | NA |
| 92  | 123 | ELVRSLAMNW NA  | NA |
| 77  | 70  | ELVRSLLEVEQ NA | NA |
| 200 | 261 | VDIRMLHRHF NA  | NA |
| 78  | 81  | VDIRMLFNVL NA  | NA |
| 59  | 80  | VDIRMLKVHY NA  | NA |
| 105 | 124 | VDIRMLHYVV NA  | NA |
| 73  | 78  | GVIRFLRSTL NA  | NA |
| 65  | 87  | NVIRFLRQPW NA  | NA |
| 38  | 44  | GVIRFLRSEF NA  | NA |
| 40  | 45  | YVIRFLRMNK NA  | NA |
| 75  | 86  | DVIRFLRQWG NA  | NA |
| 41  | 28  | LVIRFLRGPG NA  | NA |
| 35  | 58  | LVIRFLRDGW NA  | NA |
| 38  | 73  | LVIRFLRQPY NA  | NA |
| 25  | 29  | FVIRFLRYEI NA  | NA |
| 58  | 66  | DVIRFLRGWG NA  | NA |
| 104 | 120 | MHVRHLLSIW NA  | NA |
| 73  | 92  | GHVRHLLVGH NA  | NA |
| 49  | 61  | DHVRHLLGHF NA  | NA |
| 79  | 85  | QHVRHLLGMH NA  | NA |
| 41  | 59  | THVRHLLMNQ NA  | NA |
| 33  | 40  | THVRHLLAHK NA  | NA |
| 34  | 36  | EHVRHLLKSF NA  | NA |
| 44  | 54  | QHVRHLLDSY NA  | NA |
| 80  | 75  | KHVRHLLNAA NA  | NA |
| 78  | 66  | THVRHLLRWS NA  | NA |
| 92  | 101 | EHVRHLLKHG NA  | NA |
| 135 | 164 | DWHRSLRSHH NA  | NA |
| 188 | 247 | ASHRSLRSSV NA  | NA |
| 249 | 341 | MHHRSLRSKW NA  | NA |
| 80  | 100 | FKHRSLRSLG NA  | NA |
| 78  | 106 | LYHRSLRSPG NA  | NA |
| 13  | 24  | KAHRSLRSNG NA  | NA |
| 174 | 240 | VWHRSLRSGG NA  | NA |
| 47  | 81  | WRHRSLRSRG NA  | NA |



|     |                    |    |
|-----|--------------------|----|
| 71  | 83 NFHRSLRSNI NA   | NA |
| 60  | 58 KDHRSLRSAH NA   | NA |
| 174 | 218 SWHRSLRS AV NA | NA |
| 49  | 43 LQARGLQVQF NA   | NA |
| 74  | 89 TQARGLQSMY NA   | NA |
| 62  | 58 FQARGLQYIS NA   | NA |
| 77  | 81 AQARGLQSKA NA   | NA |
| 50  | 57 IQARGLQNTF NA   | NA |
| 45  | 51 FQARGLQLNA NA   | NA |
| 62  | 87 TQARGLQSNV NA   | NA |
| 88  | 111 HQARGLQGRW NA  | NA |
| 43  | 71 WQARGLQAQL NA   | NA |
| 58  | 74 KQARGLQYSI NA   | NA |
| 24  | 38 KQARGLQREG NA   | NA |
| 58  | 61 APYNHLKRHL NA   | NA |
| 41  | 55 APYNHLFKEI NA   | NA |
| 73  | 77 APYNHLHAMG NA   | NA |
| 117 | 129 GHAYHLAKLQ NA  | NA |
| 53  | 82 KAVNHLRKQL NA   | NA |
| 142 | 158 KAVNHLRYRH NA  | NA |
| 31  | 37 KAVNHLRNPF NA   | NA |
| 36  | 33 KAVNHLRQEG NA   | NA |
| 38  | 50 RTAHNLHMPA NA   | NA |
| 6   | 4 RTAHNLALNG NA    | NA |
| 30  | 44 RTAHNLFDTQ NA   | NA |
| 268 | 357 RTAHNLKLRW NA  | NA |
| 17  | 24 VHFASLFGKS NA   | NA |
| 68  | 74 WHPVSLRLVV NA   | NA |
| 60  | 78 WHPVSLRSKW NA   | NA |
| 16  | 14 WHPVSLQNGG NA   | NA |
| 30  | 54 WHPVSLRSST NA   | NA |
| 118 | 117 STIRMLRYRI NA  | NA |
| 108 | 141 STIRMLHDHK NA  | NA |
| 52  | 63 STIRMLFLGS NA   | NA |
| 51  | 52 STIRMLHNQF NA   | NA |
| 60  | 47 HTPVHLLNSW NA   | NA |
| 30  | 25 WHPVHLLNKV NA   | NA |
| 69  | 78 AKPVHLLNKV NA   | NA |
| 35  | 28 ARPVHLLNGG NA   | NA |
| 65  | 65 DFPVHLLNSL NA   | NA |
| 73  | 84 FYPVHLLNMT NA   | NA |

|     |     |                |    |
|-----|-----|----------------|----|
| 69  | 93  | YQPVHLLNHG NA  | NA |
| 60  | 66  | VHPVHLLNQR NA  | NA |
| 32  | 36  | FFPVHLLNNS NA  | NA |
| 57  | 76  | FNPIHLKSGR NA  | NA |
| 11  | 7   | RIPRFLLLQV NA  | NA |
| 29  | 45  | RIPRFLKQPQ NA  | NA |
| 55  | 63  | QTAMGLRILQ NA  | NA |
| 4   | 8   | EDIHHLRILQ NA  | NA |
| 13  | 23  | PRVHHLFGKI NA  | NA |
| 59  | 69  | PRVHHLQDRV NA  | NA |
| 64  | 77  | PRVHHLQYQGW NA | NA |
| 20  | 23  | VWVFWLRVLK NA  | NA |
| 50  | 49  | SQVRFLKLEG NA  | NA |
| 39  | 44  | SLVRFLAYVW NA  | NA |
| 16  | 36  | SLVRFLAKSG NA  | NA |
| 40  | 53  | SLVRFLLGTR NA  | NA |
| 106 | 118 | SLVRFLRARF NA  | NA |
| 27  | 24  | SLVRFLFRAG NA  | NA |
| 56  | 74  | SYALHLAVMS NA  | NA |
| 143 | 138 | SYALHLSAHL NA  | NA |
| 15  | 18  | SYALHLHLQF NA  | NA |
| 52  | 75  | SYALHLLREV NA  | NA |
| 188 | 192 | SYALHLYRHL NA  | NA |
| 72  | 72  | SYALHLMVAG NA  | NA |
| 36  | 36  | SYALHLQKAW NA  | NA |
| 95  | 103 | SYALHLMARF NA  | NA |
| 55  | 93  | SYALHLMQNQ NA  | NA |
| 24  | 24  | RAPLHMLNNG NA  | NA |
| 64  | 76  | RAPLHMLGRW NA  | NA |
| 41  | 29  | RAPLHMLREA NA  | NA |
| 0   | 1   | RAPLHMLMHH NA  | NA |
| 79  | 91  | ANAMGLFRRI NA  | NA |
| 90  | 97  | NIAMGLFRVA NA  | NA |
| 87  | 104 | WSAMGLFRHR NA  | NA |
| 101 | 108 | DYAMGLFRST NA  | NA |
| 79  | 104 | IDAMGLFRGR NA  | NA |
| 40  | 62  | GMAMGLFRWV NA  | NA |
| 78  | 73  | EAAMGLFRMH NA  | NA |
| 51  | 58  | CMAMGLFREG NA  | NA |
| 69  | 87  | WSAMGLFRKH NA  | NA |
| 80  | 95  | YYAMGLFRKL NA  | NA |

|     |                   |    |
|-----|-------------------|----|
| 70  | 91 WQAMGLFRMH NA  | NA |
| 64  | 88 KAAHGIFVHV NA  | NA |
| 52  | 63 SAAHGIFQLG NA  | NA |
| 24  | 23 WAAHGIFSQG NA  | NA |
| 30  | 37 TAAHGIFYSK NA  | NA |
| 39  | 28 TAAHGIFGQF NA  | NA |
| 36  | 39 YAAHGIFNRK NA  | NA |
| 53  | 73 SAAHGIFLMT NA  | NA |
| 39  | 54 YAAHGIFKNK NA  | NA |
| 47  | 44 RAAHGIFYMG NA  | NA |
| 42  | 83 SAAHGIFYLR NA  | NA |
| 69  | 102 ARVRHLAYEL NA | NA |
| 37  | 50 ARVRHLAGNL NA  | NA |
| 47  | 45 ARVRHLAQHL NA  | NA |
| 65  | 86 ARVRHLLGGT NA  | NA |
| 79  | 80 ARVRHLAGPH NA  | NA |
| 16  | 23 GDVVHLRIGL NA  | NA |
| 52  | 64 ANGMWLRIGL NA  | NA |
| 13  | 14 FWYFFLRIGL NA  | NA |
| 364 | 514 FAAQALRVRG NA | NA |
| 135 | 166 HQGWALRVRG NA | NA |
| 14  | 25 LVYAHLLVWW NA  | NA |
| 91  | 126 IVYAHLLGWY NA | NA |
| 124 | 182 YVYAHLLDHL NA | NA |
| 141 | 169 VVYAHLLKQV NA | NA |
| 64  | 77 SVYAHLLLHK NA  | NA |
| 170 | 188 HVYAHLLSVR NA | NA |
| 86  | 104 TVYAHLLRPG NA | NA |
| 102 | 166 EVYAHLLAWG NA | NA |
| 76  | 103 NVYAHLLQVL NA | NA |
| 35  | 40 RTPMAMAGPR NA  | NA |
| 37  | 42 PNAIHLQAIT NA  | NA |
| 60  | 76 HNAIHLQAHF NA  | NA |
| 61  | 97 CNAIHLQLGL NA  | NA |
| 23  | 33 NNAIHLQDGT NA  | NA |
| 12  | 27 QNAIHLQNLI NA  | NA |
| 27  | 38 QNAIHLQAIV NA  | NA |
| 42  | 43 KNAIHLQMTV NA  | NA |
| 67  | 59 NNAIHLQVRG NA  | NA |
| 23  | 26 RNAIHLQGTT NA  | NA |
| 43  | 45 TKMAWLHMTG NA  | NA |

|     |     |                 |    |
|-----|-----|-----------------|----|
| 55  | 73  | DNTFHLSFMSL NA  | NA |
| 59  | 40  | DNTFHLSRSPG NA  | NA |
| 95  | 109 | AHYASLFMNW NA   | NA |
| 51  | 69  | AHYASLRVVK NA   | NA |
| 51  | 71  | AHYASLRAMQ NA   | NA |
| 67  | 62  | AHYASLAYVT NA   | NA |
| 69  | 74  | AHYASLFNAA NA   | NA |
| 58  | 81  | EHAWNLRRAEH NA  | NA |
| 37  | 45  | EHAWNLRKGGG NA  | NA |
| 42  | 47  | EHAWNLANIV NA   | NA |
| 29  | 13  | EHAWNLLSPI NA   | NA |
| 36  | 23  | PHTASLFDTI NA   | NA |
| 71  | 93  | PHTASLMYAL NA   | NA |
| 42  | 35  | PHTASLMVRK NA   | NA |
| 41  | 54  | PHTASLSDIA NA   | NA |
| 50  | 56  | PHTASLSYMI NA   | NA |
| 26  | 31  | GSLAHLHLLDSK NA | NA |
| 36  | 43  | GSLAHLHQWF NA   | NA |
| 57  | 81  | GSLAHLHLPS NA   | NA |
| 17  | 20  | SSVWHIRNNF NA   | NA |
| 88  | 92  | SSVWHIRYAL NA   | NA |
| 27  | 43  | SSVWHIRAGG NA   | NA |
| 102 | 139 | RQLAAIHAWV NA   | NA |
| 72  | 115 | MRHWHLGMS NA    | NA |
| 32  | 61  | EIINHLLGMS NA   | NA |
| 24  | 23  | APHRHLLGMS NA   | NA |
| 59  | 71  | MFFVHLLGMS NA   | NA |
| 70  | 78  | VDHQHLLGMS NA   | NA |
| 36  | 49  | AWPAHLLGMS NA   | NA |
| 55  | 69  | DKLASLHLHS NA   | NA |
| 34  | 25  | SGSRALFGSV NA   | NA |
| 38  | 57  | WDALGIKLEH NA   | NA |
| 79  | 58  | WDALGIANML NA   | NA |
| 58  | 66  | RLANNLRGVK NA   | NA |
| 60  | 81  | RLANNLAKRI NA   | NA |
| 41  | 48  | RLANNLKSWS NA   | NA |
| 42  | 51  | ETALPLRNQG NA   | NA |
| 26  | 17  | QTALPLRVEA NA   | NA |
| 63  | 63  | LTALPLRVKL NA   | NA |
| 43  | 62  | FTALPLRGKA NA   | NA |
| 60  | 93  | TTALPLRSHQ NA   | NA |

|     |     |                 |    |
|-----|-----|-----------------|----|
| 48  | 55  | NTALPLRNQT NA   | NA |
| 46  | 46  | PTALPLRGS I NA  | NA |
| 45  | 69  | ETALPLRV TQ NA  | NA |
| 63  | 87  | PTALPLRYS I NA  | NA |
| 55  | 60  | HTALPLRKQ G NA  | NA |
| 58  | 57  | HTALPLRG T V NA | NA |
| 20  | 14  | YCVRFLQV LA NA  | NA |
| 15  | 11  | SCVRFLQD SA NA  | NA |
| 31  | 41  | ACVRFLQG GS NA  | NA |
| 7   | 4   | VCVRFLQN SS NA  | NA |
| 2   | 1   | NCVRFLQS ML NA  | NA |
| 9   | 5   | GCVRFLQK KL NA  | NA |
| 8   | 8   | DCVRFLQN IK NA  | NA |
| 35  | 31  | WCVRFLQQ GI NA  | NA |
| 29  | 41  | PCVRFLQN GF NA  | NA |
| 46  | 36  | PCVRFLQN PQ NA  | NA |
| 65  | 71  | CEVRFLRDE I NA  | NA |
| 32  | 58  | GEVRFLRMA H NA  | NA |
| 35  | 47  | TEVRFLRV MT NA  | NA |
| 33  | 38  | EEVRFLRNE G NA  | NA |
| 95  | 147 | EEVRFLRSA F NA  | NA |
| 38  | 49  | NEVRFLRS GH NA  | NA |
| 15  | 24  | LEVRFLRS GG NA  | NA |
| 58  | 64  | REVRFLRK LR NA  | NA |
| 68  | 106 | DEV RFLRGL Y NA | NA |
| 14  | 22  | TEVRFLRL QF NA  | NA |
| 24  | 32  | KEVRFLRGS I NA  | NA |
| 21  | 45  | TATNWLHG GL NA  | NA |
| 40  | 28  | QEPRNIK RKI NA  | NA |
| 3   | 1   | LNPAFLQYS K NA  | NA |
| 85  | 118 | GLPMHLFV QI NA  | NA |
| 48  | 51  | GLPMHLFQ IG NA  | NA |
| 117 | 125 | GLPMHLKRG W NA  | NA |
| 9   | 10  | GLPMHLQQ KV NA  | NA |
| 54  | 68  | GLPMHLRL IQ NA  | NA |
| 24  | 29  | WPVAHLQL SG NA  | NA |
| 42  | 75  | DMPAHLQL SW NA  | NA |
| 20  | 21  | EFIAHLQL SG NA  | NA |
| 41  | 36  | DMIAHLQL SL NA  | NA |
| 17  | 18  | TSA AHLQLSS NA  | NA |
| 35  | 31  | TVTQNLKQ GI NA  | NA |

|     |     |                |    |
|-----|-----|----------------|----|
| 47  | 43  | TVTQNLRDEY NA  | NA |
| 69  | 77  | TAHRNLRLQT NA  | NA |
| 99  | 98  | QKARNLRLQF NA  | NA |
| 52  | 67  | GPIRNLRLQI NA  | NA |
| 43  | 40  | GRARNLRLQR NA  | NA |
| 75  | 93  | SRAYSLAKMK NA  | NA |
| 36  | 35  | SRAYSLKQEV NA  | NA |
| 45  | 36  | RTASHLAKNF NA  | NA |
| 38  | 41  | RTASHLAKPI NA  | NA |
| 40  | 50  | RTASHLFGPG NA  | NA |
| 120 | 131 | KDYLHLRGRG NA  | NA |
| 180 | 228 | KDYLHLRAGH NA  | NA |
| 83  | 106 | KDYLHLHNIG NA  | NA |
| 25  | 45  | KDYLHLLGPF NA  | NA |
| 258 | 325 | FPGRHLRRAW NA  | NA |
| 130 | 151 | FPGRHLHNWK NA  | NA |
| 62  | 70  | HRARWLMNLI NA  | NA |
| 35  | 41  | DRARWLMRA NA   | NA |
| 65  | 83  | DRARWLMSGK NA  | NA |
| 28  | 41  | GRARWLMMLT NA  | NA |
| 92  | 107 | ERARWLMSTT NA  | NA |
| 43  | 61  | YRARWLMDMA NA  | NA |
| 25  | 27  | YRARWLMKVI NA  | NA |
| 4   | 8   | FRARWLMQIR NA  | NA |
| 33  | 54  | IRARWLMGIT NA  | NA |
| 46  | 56  | GRARWLMGMI NA  | NA |
| 44  | 60  | QRARWLMSGK NA  | NA |
| 38  | 41  | YDIHFLEFMAI NA | NA |
| 33  | 44  | YDIHFLEFMNG NA | NA |
| 32  | 37  | MSPRWLLKIT NA  | NA |
| 126 | 156 | FDAQSLRANW NA  | NA |
| 47  | 36  | FDAQSLAMTI NA  | NA |
| 31  | 40  | FDAQSLQGEK NA  | NA |
| 66  | 93  | FDAQSLSASK NA  | NA |
| 24  | 34  | FDAQSLLKQR NA  | NA |
| 51  | 70  | FDAQSLFMRF NA  | NA |
| 176 | 237 | FDAQSLQQR NA   | NA |
| 29  | 46  | FDAQSLFDIK NA  | NA |
| 44  | 59  | TIALHLKAMV NA  | NA |
| 48  | 35  | WRALHLKATG NA  | NA |
| 22  | 34  | YDALHLKAKT NA  | NA |

|     |     |                |    |
|-----|-----|----------------|----|
| 91  | 117 | IYALHLKAAY NA  | NA |
| 21  | 37  | GSALHLKAIS NA  | NA |
| 186 | 247 | HWALHLKAIR NA  | NA |
| 46  | 59  | FAALHLKAQY NA  | NA |
| 90  | 111 | IWALHLKARY NA  | NA |
| 63  | 64  | YRALHLKANK NA  | NA |
| 26  | 39  | APVLALRDHR NA  | NA |
| 33  | 70  | APVLALFMNH NA  | NA |
| 21  | 26  | APVLALFLPS NA  | NA |
| 11  | 12  | APVLALLMLG NA  | NA |
| 22  | 40  | APVLALLNSI NA  | NA |
| 41  | 46  | APVLALKNLY NA  | NA |
| 14  | 13  | APVLALLDMH NA  | NA |
| 19  | 26  | APVLALQNSY NA  | NA |
| 36  | 56  | TQVFGLFNGR NA  | NA |
| 70  | 72  | AKVMSLFVNA NA  | NA |
| 48  | 48  | AKVMSLKVKA NA  | NA |
| 103 | 77  | AKVMSLASMS NA  | NA |
| 48  | 73  | KNHWPLRVKR NA  | NA |
| 77  | 106 | AHFAHLHMKQ NA  | NA |
| 44  | 65  | AHFAHLHART NA  | NA |
| 100 | 119 | ASTLHLHMQT NA  | NA |
| 30  | 36  | ASTLHLSMPI NA  | NA |
| 28  | 45  | ASTLHLADKF NA  | NA |
| 38  | 46  | TKYAYIFMGW NA  | NA |
| 61  | 64  | HDYFNLFVLT NA  | NA |
| 40  | 49  | HDYFNLFVPK NA  | NA |
| 48  | 54  | FDISHLHRKT NA  | NA |
| 47  | 48  | MPPLGIKSSG NA  | NA |
| 43  | 38  | CPPLGIKSVV NA  | NA |
| 32  | 53  | WRPLGIKSVF NA  | NA |
| 75  | 91  | AFPLGIKSLR NA  | NA |
| 79  | 85  | HDPLGIKSWA NA  | NA |
| 48  | 49  | KFPLGIKSGT NA  | NA |
| 57  | 58  | TFPLGIKSEK NA  | NA |
| 31  | 33  | FRPLGIKSIG NA  | NA |
| 75  | 79  | DWPLGIKSAF NA  | NA |
| 89  | 107 | CSPLGIKSRK NA  | NA |
| 53  | 74  | YTPLGIKSHS NA  | NA |
| 49  | 56  | YDTQHLLRQLV NA | NA |
| 68  | 67  | YDTQHLLFRLF NA | NA |

|     |                   |    |
|-----|-------------------|----|
| 7   | 11 YDTQHLKQSG NA  | NA |
| 23  | 21 YDTQHLAKVH NA  | NA |
| 12  | 14 YDTQHLMQNY NA  | NA |
| 46  | 44 YDTQHLMGPV NA  | NA |
| 34  | 31 NSHQNLMAHT NA  | NA |
| 66  | 78 FQHQNLMAWI NA  | NA |
| 73  | 104 LSHQNLMALR NA | NA |
| 84  | 139 LKHQNLMALQ NA | NA |
| 12  | 17 SAHQNLMAKY NA  | NA |
| 141 | 163 KYHQNLMATF NA | NA |
| 49  | 60 SRHQNLMAAA NA  | NA |
| 144 | 192 FYHQNLMAAV NA | NA |
| 77  | 98 CQVRFLKGQA NA  | NA |
| 29  | 22 TSVRFLKGAG NA  | NA |
| 42  | 44 HRVRFLKGVG NA  | NA |
| 61  | 67 KMVRFLKGTT NA  | NA |
| 52  | 57 PKVRFLKGWI NA  | NA |
| 31  | 39 YKVRFLKGST NA  | NA |
| 35  | 56 NPVRFLKGNW NA  | NA |
| 49  | 73 LHVRFLKGRQ NA  | NA |
| 26  | 33 RSVRFLKGEQ NA  | NA |
| 25  | 32 KSPLGLQRAF NA  | NA |
| 42  | 44 RQLAHIFGKY NA  | NA |
| 52  | 75 RQLAHILSMR NA  | NA |
| 68  | 86 RQLAHIHSIG NA  | NA |
| 50  | 67 RQLAHIKVGY NA  | NA |
| 116 | 169 YHARSLKNAI NA | NA |
| 25  | 37 SHARSLKGPL NA  | NA |
| 66  | 91 SHARSLKYAR NA  | NA |
| 189 | 257 MHARSLKVRI NA | NA |
| 89  | 109 SHARSLKREF NA | NA |
| 164 | 167 DHARSLKGVW NA | NA |
| 58  | 82 NHARSLKNTR NA  | NA |
| 88  | 98 NHARSLKNSF NA  | NA |
| 68  | 90 GHARSLKAHV NA  | NA |
| 25  | 23 QHARSLKNLH NA  | NA |
| 50  | 48 GSAWALKKVH NA  | NA |
| 53  | 72 EHAWALKKVF NA  | NA |
| 31  | 42 NDAWALKKVI NA  | NA |
| 60  | 44 GLLLNMHQGF NA  | NA |
| 58  | 69 EVARAWFSTL NA  | NA |



|     |     |               |    |
|-----|-----|---------------|----|
| 67  | 69  | EVARAWFVVA NA | NA |
| 40  | 54  | NTPNWLLGGR NA | NA |
| 50  | 47  | NTPNWLRGSV NA | NA |
| 65  | 69  | NTPNWLFMGK NA | NA |
| 34  | 39  | NTPNWLFNPK NA | NA |
| 32  | 52  | NTPNWLADMY NA | NA |
| 67  | 63  | NTPNWLRRGV NA | NA |
| 48  | 50  | HLAYHMFLMY NA | NA |
| 58  | 75  | HLAYHMFVKT NA | NA |
| 122 | 158 | HAHASLRKMR NA | NA |
| 15  | 15  | HAHASLFLHI NA | NA |
| 16  | 23  | HAHASLLMHA NA | NA |
| 95  | 116 | HAHASLAGPW NA | NA |
| 72  | 78  | HAHASLAMQT NA | NA |
| 71  | 75  | HAHASLYNGQ NA | NA |
| 72  | 60  | HAHASLAMTG NA | NA |
| 110 | 120 | SIHLALLAGW NA | NA |
| 59  | 71  | SIHLALLGV NA  | NA |
| 47  | 50  | SIHLALRGGA NA | NA |
| 87  | 110 | SIHLALANLV NA | NA |
| 28  | 46  | SIHLALAVGL NA | NA |
| 34  | 59  | SIHLALLVMV NA | NA |
| 110 | 121 | SIHLALHYMF NA | NA |
| 40  | 54  | SIHLALFAAI NA | NA |
| 8   | 13  | SLVLNMLMMI NA | NA |
| 53  | 57  | SLVLNMFAMH NA | NA |
| 89  | 104 | SLVLNMKSRL NA | NA |
| 43  | 81  | RFALNLFGAT NA | NA |
| 19  | 29  | RFALNLQVTA NA | NA |
| 28  | 31  | RFALNLFDTG NA | NA |
| 58  | 90  | RFALNLRGMV NA | NA |
| 39  | 42  | RFALNLGSV NA  | NA |
| 43  | 49  | RFALNLQGNL NA | NA |
| 33  | 39  | LSHAWLQMQG NA | NA |
| 44  | 47  | LSHAWLQNIW NA | NA |
| 108 | 148 | LSHAWLYYTA NA | NA |
| 84  | 110 | LSHAWLKGIQ NA | NA |
| 50  | 61  | LSHAWLQVVL NA | NA |
| 114 | 138 | LSHAWLVNPT NA | NA |
| 71  | 81  | LSHAWLVNPG NA | NA |
| 105 | 165 | LSHAWLKYPS NA | NA |

|     |     |                 |    |
|-----|-----|-----------------|----|
| 86  | 113 | LSHAWLSKGF NA   | NA |
| 69  | 62  | NRPASWHRVR NA   | NA |
| 207 | 246 | DFARSMRLWR NA   | NA |
| 40  | 53  | YAARSMRLNA NA   | NA |
| 157 | 162 | YMARSMRLGW NA   | NA |
| 23  | 33  | ETARSMRLK NA    | NA |
| 121 | 133 | CSARSMRLPI NA   | NA |
| 36  | 32  | FKARSMRLNK NA   | NA |
| 33  | 28  | WDARSMRLPY NA   | NA |
| 127 | 141 | QHARSMRLGG NA   | NA |
| 19  | 23  | QDARSMRLEI NA   | NA |
| 21  | 29  | RNGLALRGTA NA   | NA |
| 23  | 35  | RNGLALFALA NA   | NA |
| 61  | 73  | RNGLALFVLS NA   | NA |
| 98  | 126 | LKIQHLRKS SV NA | NA |
| 75  | 96  | GWGQHLRKS SV NA | NA |
| 46  | 51  | SDMQHLRKS F NA  | NA |
| 25  | 32  | EPMQHLRKS S NA  | NA |
| 65  | 72  | LHAQHLRKS Y NA  | NA |
| 111 | 130 | MWHQHLRKS G NA  | NA |
| 58  | 60  | QTGQHLRKS SV NA | NA |
| 56  | 58  | LLYASLFRST NA   | NA |
| 62  | 93  | LLYASLHSLT NA   | NA |
| 37  | 33  | LLYASLANVI NA   | NA |
| 97  | 110 | LLYASLLYEK NA   | NA |
| 85  | 101 | LLYASLAMPH NA   | NA |
| 41  | 57  | LLYASLRYMG NA   | NA |
| 41  | 42  | ATIAHLMDGV NA   | NA |
| 11  | 18  | ATIAHLQNNF NA   | NA |
| 31  | 54  | ATIAHLKGAI NA   | NA |
| 29  | 39  | ATIAHLLQVI NA   | NA |
| 19  | 15  | ATIAHLQNGF NA   | NA |
| 44  | 47  | ATIAHLLNSY NA   | NA |
| 40  | 51  | GNVANLKYLG NA   | NA |
| 84  | 126 | GNVANLHVHK NA   | NA |
| 27  | 47  | GNVANLRREG NA   | NA |
| 49  | 56  | HMARFLSNWR NA   | NA |
| 68  | 76  | KMARFLSLWW NA   | NA |
| 49  | 51  | QMARFLSDSQ NA   | NA |
| 48  | 51  | WMARFLSMGY NA   | NA |
| 98  | 121 | CMARFLSGTK NA   | NA |

|     |                   |    |
|-----|-------------------|----|
| 54  | 63 QMARFLSSGT NA  | NA |
| 40  | 27 HMARFLSMEA NA  | NA |
| 93  | 116 PMARFLSLRA NA | NA |
| 81  | 74 HMARFLSMGV NA  | NA |
| 24  | 34 IMARFLSLQW NA  | NA |
| 178 | 207 LLYMGLHMGH NA | NA |
| 70  | 112 NMAWGLRLPK NA | NA |
| 40  | 53 VMAWGLRQEA NA  | NA |
| 54  | 91 FMAWGLRNQA NA  | NA |
| 44  | 68 IMAWGLRSQI NA  | NA |
| 69  | 119 TMAWGLRLKW NA | NA |
| 116 | 124 AMAWGLRAEQ NA | NA |
| 91  | 78 IMAWGLRDMR NA  | NA |
| 92  | 118 CMAWGLRAWI NA | NA |
| 87  | 88 RSHASLSMKK NA  | NA |
| 64  | 85 RSHASLSARV NA  | NA |
| 116 | 153 RSHASLHGKH NA | NA |
| 108 | 111 RSHASLRQEW NA | NA |
| 47  | 67 RSHASLRDAG NA  | NA |
| 115 | 151 RSHASLRGSW NA | NA |
| 43  | 41 RSHASLSAQF NA  | NA |
| 47  | 61 DSLAWLHKLK NA  | NA |
| 152 | 180 DSLAWLHYTH NA | NA |
| 54  | 61 STVFHMFVSR NA  | NA |
| 67  | 74 STVFHMFYLA NA  | NA |
| 46  | 60 RLYMNIKGEL NA  | NA |
| 42  | 56 RLYMNIHVEQ NA  | NA |
| 50  | 42 RLYMNIKNIL NA  | NA |
| 131 | 198 HWARSLKGWV NA | NA |
| 124 | 151 YQARSLKGEH NA | NA |
| 147 | 169 DPARSLKGGL NA | NA |
| 23  | 35 NIARSLKGTS NA  | NA |
| 107 | 142 LKARSLKGLL NA | NA |
| 104 | 112 MTARSLKGPV NA | NA |
| 75  | 81 MPARSLKGVG NA  | NA |
| 106 | 142 HDARSLKGGQ NA | NA |
| 61  | 58 RSARSLKGGK NA  | NA |
| 66  | 90 SWARSLKGAK NA  | NA |
| 24  | 37 AYARSLKGPK NA  | NA |
| 57  | 65 RQVRYLFDTR NA  | NA |
| 88  | 90 RQVRYLFLTQ NA  | NA |

|     |     |                |    |
|-----|-----|----------------|----|
| 54  | 69  | PVFQSLFYGT NA  | NA |
| 37  | 36  | PVFQSLHMLG NA  | NA |
| 78  | 86  | VNARMLRLEH NA  | NA |
| 73  | 90  | VNARMLKJNI NA  | NA |
| 100 | 135 | VNARMLHNLS NA  | NA |
| 58  | 70  | VNARMLFKVG NA  | NA |
| 79  | 103 | VNARMLAMVR NA  | NA |
| 61  | 67  | VNARMLKVKI NA  | NA |
| 93  | 121 | VNARMLANPH NA  | NA |
| 10  | 15  | SLFLHMFDMG NA  | NA |
| 23  | 31  | SLFLHMFNLI NA  | NA |
| 38  | 46  | SLFLHMHSLG NA  | NA |
| 85  | 95  | ENFLHLHMGV NA  | NA |
| 7   | 8   | ENFLHLLMLA NA  | NA |
| 62  | 122 | ENFLHLFATH NA  | NA |
| 19  | 24  | ENFLHLLMS NA   | NA |
| 28  | 25  | AGPQPLLRNQ NA  | NA |
| 50  | 56  | AGPQPLKGRK NA  | NA |
| 33  | 45  | AGPQPLRNHR NA  | NA |
| 56  | 56  | LNAQMLRGQG NA  | NA |
| 112 | 184 | LKAQMLRGHT NA  | NA |
| 46  | 45  | AAAQMLRGPK NA  | NA |
| 63  | 79  | ADAQMLRGIA NA  | NA |
| 118 | 146 | KWAQMLRGSK NA  | NA |
| 93  | 126 | LYAQMLRGWI NA  | NA |
| 113 | 136 | VNAQMLRGTG NA  | NA |
| 54  | 80  | ERAQMLRGGF NA  | NA |
| 64  | 79  | PWAQMLRGGV NA  | NA |
| 46  | 62  | ATAQMLRGGR NA  | NA |
| 14  | 30  | PDAQMLRGAL NA  | NA |
| 34  | 48  | TSLANLHGKQ NA  | NA |
| 27  | 31  | HRAAWLQYMV NA  | NA |
| 41  | 71  | GRAAWLQGIG NA  | NA |
| 48  | 50  | HRAAWLQRRL NA  | NA |
| 39  | 48  | MRAAWLQMVH NA  | NA |
| 8   | 4   | GRAAWLQSRA NA  | NA |
| 9   | 5   | ERAAWLQYTK NA  | NA |
| 16  | 15  | DRAAWLQMG I NA | NA |
| 37  | 39  | GRAAWLQQEK NA  | NA |
| 9   | 11  | WRAAWLQYKQ NA  | NA |
| 48  | 48  | GRLASLHKSH NA  | NA |

|     |                   |    |
|-----|-------------------|----|
| 50  | 80 TMGMNMRMAR NA  | NA |
| 62  | 52 RYAQPLRVQI NA  | NA |
| 72  | 103 RYAQPLRLGH NA | NA |
| 51  | 36 RYAQPLKVGK NA  | NA |
| 11  | 10 LPYFSMLNVI NA  | NA |
| 62  | 86 FPVLSLLGAK NA  | NA |
| 63  | 66 FPVLSLKRKF NA  | NA |
| 53  | 79 GSVMNLFRCV NA  | NA |
| 4   | 11 GSVMNLRANF NA  | NA |
| 44  | 58 GSVMNLFYKF NA  | NA |
| 35  | 43 GSVMNLKVSU NA  | NA |
| 7   | 20 GSVMNLRRCV NA  | NA |
| 42  | 67 IPLLNLRAHA NA  | NA |
| 43  | 60 GLGLNLFGRQ NA  | NA |
| 56  | 60 TFARSLKGLV NA  | NA |
| 39  | 52 TFARSLQMPV NA  | NA |
| 42  | 49 TFARSLFSMV NA  | NA |
| 41  | 62 TFARSLMGGK NA  | NA |
| 28  | 53 TFARSLQGNW NA  | NA |
| 41  | 53 TFARSLAVAR NA  | NA |
| 30  | 50 PYPLHLQVMG NA  | NA |
| 53  | 51 YYPLHLQDSL NA  | NA |
| 55  | 59 PYPLHLQLST NA  | NA |
| 19  | 25 VYPLHLQQTF NA  | NA |
| 26  | 26 TYPLHLQYNY NA  | NA |
| 58  | 77 HYPLHLQGPA NA  | NA |
| 72  | 96 DYPLHLQYNS NA  | NA |
| 57  | 76 IYPLHLQQQQ NA  | NA |
| 31  | 40 LYPLHLQLSV NA  | NA |
| 64  | 107 QYPLHLQYRA NA | NA |
| 63  | 55 SYPLHLQAQI NA  | NA |
| 40  | 49 AGVRYLFCGR NA  | NA |
| 41  | 53 SRYLPMAALG NA  | NA |
| 48  | 42 SRYLPMRAIA NA  | NA |
| 65  | 63 SRYLPMHMVI NA  | NA |
| 43  | 58 SRYLPMKGTR NA  | NA |
| 79  | 71 SRYLPMHVIL NA  | NA |
| 43  | 45 SRYLPMLLVF NA  | NA |
| 34  | 51 SRYLPMLYKI NA  | NA |
| 43  | 70 PIALHWLDMH NA  | NA |
| 109 | 145 PIALHWHMTA NA | NA |

|     |                    |    |
|-----|--------------------|----|
| 45  | 46 KIGQHLLRVHK NA  | NA |
| 117 | 138 MQGQHLLRVHF NA | NA |
| 127 | 156 FDGQHLLRVHQ NA | NA |
| 75  | 107 KNYQHLLRVHG NA | NA |
| 113 | 122 MDIQHLLRVHV NA | NA |
| 52  | 51 DPHQHLLRVHT NA  | NA |
| 25  | 50 KNGQHLLRVHY NA  | NA |
| 65  | 70 GMAQYLK GAR NA  | NA |
| 17  | 17 VRVLHLLMDAT NA  | NA |
| 21  | 14 VRVLHLLKNNK NA  | NA |
| 54  | 81 VRVLHLLHAWI NA  | NA |
| 32  | 46 VRVLHLLSNTG NA  | NA |
| 23  | 36 VRVLHLLANGT NA  | NA |
| 12  | 26 VRVLHLLANSV NA  | NA |
| 57  | 84 VVYRGLHYLW NA   | NA |
| 24  | 41 FSARSLMQSG NA   | NA |
| 35  | 33 FSARSLVVKG NA   | NA |
| 57  | 76 FSARSLHSMT NA   | NA |
| 83  | 99 FSARSLRRPH NA   | NA |
| 18  | 26 FSARSLFKQR NA   | NA |
| 44  | 62 FSARSLYREV NA   | NA |
| 97  | 114 FSARSLRDAK NA  | NA |
| 53  | 51 FSARSLYYGA NA   | NA |
| 18  | 31 AMPLHMLKNF NA   | NA |
| 30  | 41 AMPLHMLSLG NA   | NA |
| 82  | 118 AMPLHMLSIL NA  | NA |
| 75  | 83 SIVRMLFATY NA   | NA |
| 97  | 98 IEAWSLKLLY NA   | NA |
| 37  | 43 GYIQSLFKTG NA   | NA |
| 48  | 42 IYIQSLFGMR NA   | NA |
| 83  | 79 VYIQSLFKHV NA   | NA |
| 36  | 53 VYIQSLFVLH NA   | NA |
| 39  | 64 PYIQSLFVGV NA   | NA |
| 102 | 100 CYIQSLFKWS NA  | NA |
| 40  | 50 TYIQSLFARV NA   | NA |
| 42  | 51 QYIQSLFDIL NA   | NA |
| 58  | 85 GYIQSLFQGR NA   | NA |
| 32  | 30 TYIQSLFQAV NA   | NA |
| 53  | 34 KFHASLQMLG NA   | NA |
| 12  | 20 GSPASLQMLV NA   | NA |
| 61  | 59 VWIASLQMLK NA   | NA |

|     |     |                |    |
|-----|-----|----------------|----|
| 27  | 32  | WHVASLQMLY NA  | NA |
| 43  | 42  | HQAASLQMLY NA  | NA |
| 99  | 105 | FWHMMLKLQP NA  | NA |
| 64  | 60  | RDVLALKQSL NA  | NA |
| 63  | 106 | RDVLALLVAH NA  | NA |
| 71  | 60  | RDVLALKLMT NA  | NA |
| 46  | 77  | VRAHSLRAEG NA  | NA |
| 24  | 36  | VRAHSLYRLY NA  | NA |
| 25  | 43  | VRAHSLKNQK NA  | NA |
| 75  | 96  | VRAHSLRRHI NA  | NA |
| 66  | 72  | VRAHSLHDGT NA  | NA |
| 36  | 35  | RVTWALRSLY NA  | NA |
| 27  | 20  | RVTWALAGQR NA  | NA |
| 11  | 16  | RVTWALAGPF NA  | NA |
| 56  | 60  | RVTWALKLGH NA  | NA |
| 31  | 53  | RVTWALKKWK NA  | NA |
| 16  | 12  | RVTWALAAKT NA  | NA |
| 30  | 17  | RVTWALLDKI NA  | NA |
| 28  | 63  | QFHFSLRTWL NA  | NA |
| 66  | 57  | QKVLNMRGTW NA  | NA |
| 30  | 32  | QKVLNMFDFK NA  | NA |
| 45  | 56  | QKVLNMLMML NA  | NA |
| 31  | 51  | QKVLNMADEH NA  | NA |
| 17  | 18  | QKVLNMLMPI NA  | NA |
| 97  | 93  | QKVLNMRRRG NA  | NA |
| 259 | 325 | ATHQALRVQL NA  | NA |
| 324 | 385 | MFGRALRVQL NA  | NA |
| 61  | 79  | TPGWALRVQL NA  | NA |
| 110 | 111 | CMPHSMKLEW NA  | NA |
| 85  | 97  | MFPHSMKLNH NA  | NA |
| 66  | 82  | RFPHSMKLI NA   | NA |
| 48  | 71  | ESPHSMKLEQ NA  | NA |
| 93  | 113 | PHPHSMKLLS NA  | NA |
| 98  | 107 | GDPHSMKLHH NA  | NA |
| 73  | 93  | SNPHSMKCLKH NA | NA |
| 64  | 94  | FKPHSMKLEG NA  | NA |
| 86  | 99  | GSPHSMKLWK NA  | NA |
| 67  | 79  | RHPHSMKLNA NA  | NA |
| 30  | 43  | TKVLWLKDLG NA  | NA |
| 44  | 43  | TKVLWLKGS NA   | NA |
| 54  | 51  | TKVLWLFVRL NA  | NA |

|     |     |                |    |
|-----|-----|----------------|----|
| 83  | 72  | TKVLWLSMVG NA  | NA |
| 43  | 57  | TKVLWLFVTT NA  | NA |
| 40  | 55  | TKVLWLMNQF NA  | NA |
| 36  | 57  | TKVLWLRST NA   | NA |
| 130 | 185 | PKAYSLRLF NA   | NA |
| 286 | 349 | TAHMSLRLF NA   | NA |
| 154 | 191 | LKHVSLRLF NA   | NA |
| 287 | 367 | PDAQSLRLF NA   | NA |
| 293 | 403 | FYHASLRLF NA   | NA |
| 283 | 435 | YSARSLRLF NA   | NA |
| 41  | 41  | LFGAFLMSWM NA  | NA |
| 36  | 33  | YRYLFLMSWM NA  | NA |
| 22  | 33  | RAYVALQVPT NA  | NA |
| 33  | 32  | QRFMALQVPT NA  | NA |
| 61  | 80  | GKARALQVPT NA  | NA |
| 49  | 67  | DRAQNLLGER NA  | NA |
| 28  | 33  | RRAQNLLGWY NA  | NA |
| 45  | 48  | TRAQNLLYTA NA  | NA |
| 15  | 18  | QRAQNLLGQF NA  | NA |
| 25  | 53  | WRAQNLLGTL NA  | NA |
| 16  | 15  | WRAQNLLDWY NA  | NA |
| 41  | 66  | TRAQNLLYAS NA  | NA |
| 65  | 60  | TRAQNLLVQS NA  | NA |
| 48  | 42  | CRAQNLLKVR NA  | NA |
| 1   | 3   | LRAQNLLGPY NA  | NA |
| 21  | 19  | QHLAALHGGA NA  | NA |
| 49  | 51  | QTVNSLRRSS NA  | NA |
| 243 | 286 | CHVNSLRRRAK NA | NA |
| 42  | 59  | EHVNSLRRRES NA | NA |
| 170 | 216 | CIVNSLRRRS NA  | NA |
| 26  | 25  | DTVNSLRRRIY NA | NA |
| 19  | 23  | GKVNSLRRMG NA  | NA |
| 215 | 243 | IQVNSLRRRG NA  | NA |
| 56  | 53  | AKVNSLRRSY NA  | NA |
| 43  | 30  | PPVNSLRRVH NA  | NA |
| 70  | 105 | RPAVALRLWH NA  | NA |
| 40  | 66  | GTAVALRLNG NA  | NA |
| 118 | 158 | AAVALRLNL NA   | NA |
| 80  | 105 | IFAVALRLSG NA  | NA |
| 216 | 290 | MHAVALRLGS NA  | NA |
| 44  | 49  | LYAVALRLEG NA  | NA |



|     |                   |    |
|-----|-------------------|----|
| 31  | 31 QRAVALRLTK NA  | NA |
| 41  | 43 YRAVALRLKG NA  | NA |
| 42  | 60 GDAVALRLTW NA  | NA |
| 45  | 71 GPGVMLLMKQ NA  | NA |
| 12  | 26 VTVIALFDTS NA  | NA |
| 62  | 77 VTVIALFAGL NA  | NA |
| 36  | 41 ATASFLRDMF NA  | NA |
| 33  | 52 DIAMNILYLK NA  | NA |
| 63  | 75 KIAMNILGWT NA  | NA |
| 28  | 45 NIAMNILYVF NA  | NA |
| 32  | 41 YIAMNILYIF NA  | NA |
| 49  | 44 GIAMNILVVL NA  | NA |
| 89  | 103 AIAMNILGNW NA | NA |
| 19  | 16 YIAMNILLVV NA  | NA |
| 53  | 48 IIAMNILVIK NA  | NA |
| 65  | 63 AIAMNILYQL NA  | NA |
| 100 | 121 MIAMNILNVK NA | NA |
| 29  | 45 TIAMNILVTW NA  | NA |
| 90  | 125 KTIAHLHNNV NA | NA |
| 28  | 38 RTIAHLHMIS NA  | NA |
| 93  | 109 DTIAHLHGKY NA | NA |
| 113 | 183 HTIAHLHSAT NA | NA |
| 89  | 107 STIAHLHDTR NA | NA |
| 81  | 71 ATIAHLHMQQ NA  | NA |
| 114 | 149 CTIAHLHGWQ NA | NA |
| 42  | 73 YTIAHLHSGL NA  | NA |
| 38  | 43 NTIAHLHDGF NA  | NA |
| 69  | 81 LTIAHLHATK NA  | NA |
| 51  | 51 HVLQNLFNTY NA  | NA |
| 60  | 63 KAALPLRQMT NA  | NA |
| 42  | 38 KAALPLRSQI NA  | NA |
| 58  | 71 TSVLALQAWT NA  | NA |
| 40  | 49 TSVLALRNMI NA  | NA |
| 21  | 26 TSVLALQKKF NA  | NA |
| 33  | 27 TSVLALQQQV NA  | NA |
| 10  | 13 TSVLALQLET NA  | NA |
| 40  | 57 FTPLNMRNIG NA  | NA |
| 55  | 70 FTPLNMRMGT NA  | NA |
| 3   | 4 VRTMALFYLQ NA   | NA |
| 46  | 42 VRTMALFDPI NA  | NA |
| 39  | 36 VRTMALLLIG NA  | NA |

|     |     |               |    |
|-----|-----|---------------|----|
| 38  | 60  | VRTMALFGNF NA | NA |
| 56  | 73  | VRTMALLQGR NA | NA |
| 32  | 39  | FAAYSLRVKI NA | NA |
| 29  | 39  | FAAYSLARGF NA | NA |
| 26  | 28  | FAAYSLAKGI NA | NA |
| 85  | 114 | QTAYSLRVIL NA | NA |
| 80  | 96  | LQAYSLRVGY NA | NA |
| 25  | 25  | FSAYSLRVLH NA | NA |
| 48  | 59  | QPAYSLRVLT NA | NA |
| 56  | 82  | IFAYSLRVNR NA | NA |
| 92  | 117 | MRAYSLRVGT NA | NA |
| 40  | 54  | EFAYSLRVLQ NA | NA |
| 115 | 137 | MHAYSLRVGV NA | NA |
| 37  | 39  | YMAYSLRVSG NA | NA |
| 86  | 90  | CTAYSLRVWF NA | NA |
| 31  | 43  | PPAYSLRVSQ NA | NA |
| 75  | 74  | EYVNFLRKMK NA | NA |
| 16  | 15  | TFPNFLRKMG NA | NA |
| 41  | 47  | FRANFLRKMI NA | NA |
| 69  | 71  | PYYNFLRKMW NA | NA |
| 31  | 37  | WAALALLDGF NA | NA |
| 64  | 74  | KWALALLDIG NA | NA |
| 38  | 61  | WQALALLDNA NA | NA |
| 33  | 40  | EMALALLDGF NA | NA |
| 40  | 49  | PAALALLDRF NA | NA |
| 74  | 84  | LKALALLDRG NA | NA |
| 81  | 124 | DHALALLDWF NA | NA |
| 52  | 40  | LMALALLDVW NA | NA |
| 39  | 33  | ELPNFLLNVV NA | NA |
| 9   | 14  | ELPNFLKDPQ NA | NA |
| 65  | 97  | ELPNFLKRAK NA | NA |
| 37  | 33  | ELPNFLRQQY NA | NA |
| 69  | 87  | SWGLALFGHG NA | NA |
| 126 | 181 | SWGLALRKLK NA | NA |
| 51  | 65  | MFHLNILMGY NA | NA |
| 63  | 97  | MFHLNIYQAA NA | NA |
| 52  | 48  | MFHLNIKSQF NA | NA |
| 76  | 80  | MFHLNIRKQY NA | NA |
| 23  | 27  | MFHLNILQAG NA | NA |
| 68  | 78  | MFHLNIMGQA NA | NA |
| 32  | 43  | MFHLNISGLA NA | NA |

|     |                    |    |
|-----|--------------------|----|
| 88  | 116 MFHLNILGHR NA  | NA |
| 72  | 78 MFHLNIKGMW NA   | NA |
| 58  | 49 RKALNLRNTH NA   | NA |
| 18  | 30 RKALNLLQWQ NA   | NA |
| 77  | 91 RKALNLRDWG NA   | NA |
| 55  | 68 RKALNLKRWQ NA   | NA |
| 82  | 85 RKALNLRMWY NA   | NA |
| 53  | 62 RKALNLFYSI NA   | NA |
| 172 | 217 VDHAHLYNMW NA  | NA |
| 49  | 62 VDHAHLAAGQ NA   | NA |
| 57  | 70 VDHAHLKMSR NA   | NA |
| 38  | 46 VDHAHLHVPQ NA   | NA |
| 71  | 74 PGIANLRQSS NA   | NA |
| 47  | 41 PGIANLRANV NA   | NA |
| 149 | 241 TLTHHLLVHH NA  | NA |
| 63  | 88 TLTHHLMGNQ NA   | NA |
| 42  | 47 TLTHHLYKTF NA   | NA |
| 83  | 75 TLTHHLKDGL NA   | NA |
| 120 | 140 TLTHHLYRGF NA  | NA |
| 42  | 55 TLTHHLHNQY NA   | NA |
| 58  | 63 TLTHHLMNLG NA   | NA |
| 86  | 91 EVSQHLRRMG NA   | NA |
| 28  | 34 VNIQWLRMWI NA   | NA |
| 28  | 36 DILRHLEFVKH NA  | NA |
| 29  | 34 DILRHLDHDTT NA  | NA |
| 81  | 116 KKPM SLRMKI NA | NA |
| 57  | 77 GQPM SLRMMK NA  | NA |
| 53  | 92 VMPM SLRMIV NA  | NA |
| 79  | 113 TSPM SLRMWW NA | NA |
| 169 | 179 KHPM SLRMGQ NA | NA |
| 171 | 230 HDPM SLRMGK NA | NA |
| 47  | 66 GAPM SLRMAI NA  | NA |
| 40  | 43 RSPM SLRMEV NA  | NA |
| 15  | 24 LQPM SLRMAG NA  | NA |
| 101 | 119 RNPm SLRMGH NA | NA |
| 87  | 120 YHPM SLRMRI NA | NA |
| 31  | 29 SKVLFLNLW NA    | NA |
| 40  | 42 SKVLFLHALV NA   | NA |
| 11  | 18 SKVLFLFSGT NA   | NA |
| 24  | 22 SKVLFLRAST NA   | NA |
| 27  | 30 SKVLFLQDEW NA   | NA |

|     |     |            |    |    |
|-----|-----|------------|----|----|
| 36  | 32  | SKVLFLKVRG | NA | NA |
| 21  | 23  | SKVLFLKRLR | NA | NA |
| 39  | 46  | SKVLFLKGEF | NA | NA |
| 52  | 53  | SKVLFLMMKS | NA | NA |
| 26  | 46  | SKVLFLMAPG | NA | NA |
| 23  | 26  | CCAMGLKNIK | NA | NA |
| 79  | 96  | CCAMGLFDLV | NA | NA |
| 29  | 25  | CCAMGLLSKA | NA | NA |
| 85  | 112 | KFVLSLRYQA | NA | NA |
| 73  | 64  | NAVLSLRYGY | NA | NA |
| 37  | 55  | RHVLSLRYTL | NA | NA |
| 104 | 130 | IKVLSLRYSR | NA | NA |
| 36  | 40  | GHVLSLRYTI | NA | NA |
| 32  | 31  | MIVLSLRYSF | NA | NA |
| 78  | 107 | HNVLSLRYQG | NA | NA |
| 52  | 44  | YAVLSLRYWK | NA | NA |
| 97  | 143 | FKVLSLRYLS | NA | NA |
| 11  | 19  | PGVRFLQDQI | NA | NA |
| 46  | 39  | PGVRFLLQPR | NA | NA |
| 36  | 53  | PGVRFLKGGQ | NA | NA |
| 10  | 18  | PGVRFLQSIG | NA | NA |
| 52  | 84  | PGVRFLLRAL | NA | NA |
| 75  | 95  | PGVRFLQQRH | NA | NA |
| 77  | 78  | RTYSHLHLTY | NA | NA |
| 21  | 27  | HLVAWLLMMG | NA | NA |
| 92  | 100 | HLVAWLLGHS | NA | NA |
| 87  | 97  | HLVAWLASHT | NA | NA |
| 34  | 32  | HLVAWLFMAA | NA | NA |
| 20  | 56  | HLVAWLSVET | NA | NA |
| 127 | 147 | HLVAWLKKRK | NA | NA |
| 49  | 58  | VVAVSLYNMV | NA | NA |
| 49  | 62  | VVAVSLSAGK | NA | NA |
| 43  | 37  | VVAVSLSQEA | NA | NA |
| 4   | 1   | VVAVSLQRMS | NA | NA |
| 63  | 60  | VVAVSLRGWS | NA | NA |
| 29  | 38  | VVAVSLYSNV | NA | NA |
| 67  | 80  | VVAVSLSANW | NA | NA |
| 137 | 173 | SLYRALHKRH | NA | NA |
| 41  | 67  | GKTWALLVSK | NA | NA |
| 26  | 26  | SVARNLQNGL | NA | NA |
| 41  | 63  | SVARNLAMVI | NA | NA |

|     |                   |    |
|-----|-------------------|----|
| 66  | 82 SVARNLSAKG NA  | NA |
| 52  | 56 SVARNLKMES NA  | NA |
| 76  | 87 SVARNLSMRQ NA  | NA |
| 21  | 32 SVARNLQLRI NA  | NA |
| 38  | 60 LVVAALQKLQ NA  | NA |
| 154 | 211 WNYMHKIVRA NA | NA |
| 99  | 111 VRYMHKIVGA NA | NA |
| 82  | 94 PDYMHKIVHG NA  | NA |
| 84  | 93 CWYMHKIVGT NA  | NA |
| 90  | 93 VTYMHKIVGF NA  | NA |
| 67  | 82 MWYMHKIVSV NA  | NA |
| 148 | 203 HNYMHKIVNT NA | NA |
| 220 | 288 HHYMHKIVHQ NA | NA |
| 120 | 135 GKYMHKIVRA NA | NA |
| 159 | 173 VHYMHKIVAR NA | NA |
| 6   | 18 ELYASLFSSI NA  | NA |
| 39  | 31 ELYASLFSLH NA  | NA |
| 44  | 53 ELYASLRQGA NA  | NA |
| 117 | 159 ELYASLHDWW NA | NA |
| 69  | 100 VHVHALFGGA NA | NA |
| 66  | 81 VHVHALHLHF NA  | NA |
| 75  | 95 YQTMALHMVT NA  | NA |
| 46  | 79 YQTMALAGMY NA  | NA |
| 110 | 127 YQTMALAMPS NA | NA |
| 96  | 134 YQTMALHYER NA | NA |
| 84  | 116 YQTMALKDKS NA | NA |
| 66  | 64 YQTMALFQIT NA  | NA |
| 37  | 38 MAYQSLAKQR NA  | NA |
| 29  | 23 MAYQSLKQF NA   | NA |
| 28  | 36 MAYQSLSREY NA  | NA |
| 25  | 32 ESAQMIRLEI NA  | NA |
| 10  | 16 ESAQMIAKKK NA  | NA |
| 47  | 55 ESAQMIKNHL NA  | NA |
| 30  | 35 ESAQMIQSGT NA  | NA |
| 26  | 37 FIARALAVVI NA  | NA |
| 106 | 145 FIARALRKTG NA | NA |
| 33  | 43 FIARALQRIF NA  | NA |
| 96  | 128 FIARALSMPK NA | NA |
| 48  | 71 FIARALLSQG NA  | NA |
| 13  | 11 FIARALAQAI NA  | NA |
| 91  | 112 FIARALQALY NA | NA |

|     |                    |    |
|-----|--------------------|----|
| 15  | 22 VFALNLQKIR NA   | NA |
| 39  | 29 VFALNLSGTL NA   | NA |
| 62  | 64 RVIRHLFLGQ NA   | NA |
| 29  | 21 RVIRHLQDGG NA   | NA |
| 54  | 68 RVIRHLRLIW NA   | NA |
| 50  | 55 RVIRHLRNGG NA   | NA |
| 36  | 35 RVIRHLQGMR NA   | NA |
| 66  | 65 RVIRHLAGIK NA   | NA |
| 11  | 22 NFGRPFLKLS NA   | NA |
| 25  | 30 NFGRPFLGSA NA   | NA |
| 44  | 65 LPTRWLMGGF NA   | NA |
| 45  | 50 LPTRWLSGTI NA   | NA |
| 60  | 58 LPTRWLFGGG NA   | NA |
| 110 | 119 LPTRWLKMSL NA  | NA |
| 60  | 69 DRIRHLLKWK NA   | NA |
| 64  | 78 DRIRHLAGRA NA   | NA |
| 43  | 53 DRIRHLFSLF NA   | NA |
| 59  | 103 DRIRHLHQMFM NA | NA |
| 79  | 99 WLAQALMAWS NA   | NA |
| 56  | 74 WLAQALFSGY NA   | NA |
| 14  | 18 WLAQALFMWV NA   | NA |
| 69  | 79 WLAQALYSAS NA   | NA |
| 28  | 47 WLAQALFQMQ NA   | NA |
| 36  | 37 FHIAHLQVWF NA   | NA |
| 84  | 75 FHIAHLHSGY NA   | NA |
| 82  | 101 FHIAHLFKPQ NA  | NA |
| 145 | 175 FHIAHLRNSQ NA  | NA |
| 175 | 205 FHIAHLMYNK NA  | NA |
| 71  | 85 FHIAHLKAKI NA   | NA |
| 114 | 143 FHIAHLLGHQ NA  | NA |
| 94  | 104 EFPLSLRSNH NA  | NA |
| 113 | 135 TYPLSLRSLV NA  | NA |
| 98  | 104 RFPLSLRSKR NA  | NA |
| 97  | 106 PYPLSLRSLW NA  | NA |
| 74  | 63 NRPLSLRSST NA   | NA |
| 55  | 81 SIPLSLRSVS NA   | NA |
| 88  | 103 KNPLSLRSHS NA  | NA |
| 70  | 102 AMPLSLRSLW NA  | NA |
| 49  | 70 FFPLSLRSNQ NA   | NA |
| 45  | 58 DVAFHLKAAA NA   | NA |
| 52  | 54 DVAFHLLQPK NA   | NA |

|     |     |            |    |    |
|-----|-----|------------|----|----|
| 22  | 31  | DVAFHLLLPI | NA | NA |
| 78  | 96  | DVAFHLLAQW | NA | NA |
| 130 | 186 | AIYRSMHSRR | NA | NA |
| 62  | 54  | AIYRSMFQEF | NA | NA |
| 53  | 60  | AIYRSMLGPL | NA | NA |
| 70  | 101 | WLAVGLRSNH | NA | NA |
| 69  | 88  | RLAVGLRQHH | NA | NA |
| 104 | 118 | MLAVGLRSAF | NA | NA |
| 62  | 99  | VLAVGLRVPW | NA | NA |
| 61  | 47  | MLAVGLRAVS | NA | NA |
| 50  | 53  | QLAVGLRDEV | NA | NA |
| 59  | 77  | RLAVGLRVTT | NA | NA |
| 51  | 68  | CLAVGLRREV | NA | NA |
| 74  | 89  | WLAVGLRKKR | NA | NA |
| 63  | 78  | KLAVGLRMKA | NA | NA |
| 36  | 39  | YRVAFLKQI  | NA | NA |
| 51  | 56  | YRVAFLMGKV | NA | NA |
| 22  | 11  | YRVAFLLVVI | NA | NA |
| 83  | 99  | YRVAFLMSVK | NA | NA |
| 104 | 116 | YRVAFLHYNF | NA | NA |
| 94  | 90  | YRVAFLKVHY | NA | NA |
| 38  | 36  | YRVAFLHAVG | NA | NA |
| 62  | 83  | VIVAALHLHG | NA | NA |
| 94  | 135 | VIVAALHSMV | NA | NA |
| 8   | 16  | VIVAALQLLW | NA | NA |
| 25  | 35  | NWALGLEPL  | NA | NA |
| 27  | 44  | SNALGLENL  | NA | NA |
| 39  | 42  | CTALGLES   | NA | NA |
| 28  | 31  | SWALGLES   | NA | NA |
| 38  | 40  | GSALGLENQ  | NA | NA |
| 21  | 34  | QAALGLEEF  | NA | NA |
| 13  | 23  | YSALGLESY  | NA | NA |
| 37  | 41  | VQALGLEVW  | NA | NA |
| 38  | 35  | FAALGLES   | NA | NA |
| 50  | 45  | NRALGLET   | NA | NA |
| 19  | 24  | SPALGLELH  | NA | NA |
| 98  | 100 | CVGHNLRNNT | NA | NA |
| 95  | 135 | MVGHNLRRWL | NA | NA |
| 102 | 127 | QVGHNLRAAH | NA | NA |
| 44  | 54  | QVGHNLRDKK | NA | NA |
| 268 | 289 | SVGHNLRLLR | NA | NA |

|     |     |                |    |
|-----|-----|----------------|----|
| 110 | 131 | CVGHNLRQGF NA  | NA |
| 64  | 91  | FVGHNLRGGQ NA  | NA |
| 57  | 72  | FVGHNLRMQV NA  | NA |
| 99  | 143 | DVGHNLRRLAK NA | NA |
| 63  | 73  | LVGHNLRGGV NA  | NA |
| 80  | 129 | LVGHNLRDWG NA  | NA |
| 65  | 89  | FYGLHLRDIT NA  | NA |
| 101 | 158 | HYGLHLRDHV NA  | NA |
| 142 | 183 | WYGLHLRQQW NA  | NA |
| 55  | 77  | PYGLHLRNEV NA  | NA |
| 166 | 216 | WYGLHLRMPR NA  | NA |
| 134 | 154 | MYGLHLRYVV NA  | NA |
| 13  | 21  | YYGLHLRGKK NA  | NA |
| 74  | 95  | IYGLHLRQST NA  | NA |
| 169 | 170 | AYGLHLRNWT NA  | NA |
| 102 | 109 | HPAALQDRY NA   | NA |
| 133 | 139 | NWNLALKQMY NA  | NA |
| 164 | 176 | PWNLALKQAQ NA  | NA |
| 131 | 121 | MMNLALKQWG NA  | NA |
| 48  | 64  | TYNLALKQNA NA  | NA |
| 180 | 244 | HSNLALKQOK NA  | NA |
| 108 | 141 | FFNLALKQGV NA  | NA |
| 208 | 241 | ISNLALKQRF NA  | NA |
| 115 | 101 | KTNLALKQMW NA  | NA |
| 63  | 84  | TVLRSLARIW NA  | NA |
| 56  | 59  | GMVLNLANHV NA  | NA |
| 40  | 75  | GMVLNLRRIK NA  | NA |
| 84  | 107 | SIPNALKLPR NA  | NA |
| 79  | 73  | SIPNALKATQ NA  | NA |
| 63  | 86  | RFYLPLLYSV NA  | NA |
| 29  | 42  | SSYLPLLYTQ NA  | NA |
| 42  | 46  | KTYLPLLYST NA  | NA |
| 51  | 52  | VNYLPLLYWI NA  | NA |
| 43  | 71  | WTYLPLLYPI NA  | NA |
| 136 | 172 | VPYLPLLYHI NA  | NA |
| 60  | 53  | GIYLPLLYMW NA  | NA |
| 161 | 185 | TMYLPLLYHA NA  | NA |
| 66  | 73  | PSYLPLLYNH NA  | NA |
| 41  | 54  | FWYLPLLYMK NA  | NA |
| 75  | 86  | HTYLPLLYKQ NA  | NA |
| 55  | 68  | IFINFLRVHV NA  | NA |



|     |     |               |    |
|-----|-----|---------------|----|
| 61  | 81  | IFINFLRNTQ NA | NA |
| 15  | 26  | IFINFLRMIY NA | NA |
| 35  | 62  | VHAVWLKNGG NA | NA |
| 11  | 18  | VHAVWLQNKT NA | NA |
| 17  | 23  | VHAVWLFYEF NA | NA |
| 64  | 79  | VHAVWLFYEG NA | NA |
| 38  | 53  | VHAVWLQMNH NA | NA |
| 6   | 17  | VHAVWLLMVA NA | NA |
| 64  | 82  | NKTAWLSLNT NA | NA |
| 84  | 85  | NKTAWLKSLT NA | NA |
| 55  | 76  | NKTAWLHNSA NA | NA |
| 66  | 85  | VWGRALHGGG NA | NA |
| 156 | 221 | VWGRALRSSG NA | NA |
| 16  | 26  | GMYLNLKGEY NA | NA |
| 53  | 38  | HMYLNLKMGG NA | NA |
| 21  | 19  | FMYLNLKGVG NA | NA |
| 18  | 36  | KMYLNLKKKL NA | NA |
| 68  | 87  | FMYLNLKGGK NA | NA |
| 33  | 35  | RMYLNLKNNY NA | NA |
| 45  | 44  | NMYLNLKQGF NA | NA |
| 39  | 44  | SMYLNLKLSA NA | NA |
| 74  | 81  | WMYLNLKDGY NA | NA |
| 62  | 100 | NMYLNLKDHQ NA | NA |
| 40  | 62  | YMYLNLKQGT NA | NA |
| 62  | 48  | RDVLWLFQGH NA | NA |
| 71  | 74  | RDVLWLSGIW NA | NA |
| 37  | 47  | RDVLWLSQKV NA | NA |
| 61  | 84  | IFPMHLRSTS NA | NA |
| 89  | 127 | MDPMHLRSWK NA | NA |
| 41  | 49  | MQPMHLRSNT NA | NA |
| 131 | 146 | VYPMHLRSPY NA | NA |
| 67  | 89  | WDPMHLRSLA NA | NA |
| 137 | 141 | DWPMHLRSHK NA | NA |
| 94  | 102 | STPMHLRSLG NA | NA |
| 169 | 228 | AYPMHLRSVS NA | NA |
| 196 | 215 | CSPMHLRSSR NA | NA |
| 100 | 109 | ADPMHLRSGS NA | NA |
| 105 | 89  | HPPMHLRSNV NA | NA |
| 42  | 42  | STVRNLKMKK NA | NA |
| 69  | 85  | RRTAWLKVTH NA | NA |
| 36  | 60  | RRTAWLHNAG NA | NA |

|     |                    |    |
|-----|--------------------|----|
| 56  | 68 RRTAWLKDWA NA   | NA |
| 144 | 182 RRTAWLHMHQ NA  | NA |
| 32  | 28 RRTAWLFLSV NA   | NA |
| 89  | 115 RRTAWLFGGV NA  | NA |
| 48  | 66 RRTAWLRKIT NA   | NA |
| 79  | 102 RRTAWLAKGA NA  | NA |
| 62  | 66 RRTAWLHALL NA   | NA |
| 88  | 107 RRV AHLRGHL NA | NA |
| 157 | 197 HRVAHLRDGI NA  | NA |
| 129 | 133 YRVAHLRAHI NA  | NA |
| 77  | 107 VRVAHLRRLT NA  | NA |
| 108 | 132 NRVAHLRMNV NA  | NA |
| 37  | 37 YRVAHLRLVV NA   | NA |
| 40  | 61 LRV AHLRVNL NA  | NA |
| 25  | 37 QRVAHLRKIV NA   | NA |
| 63  | 58 NRVAHLRLPG NA   | NA |
| 24  | 37 LRV AHLRASG NA  | NA |
| 60  | 47 VDILHLLNNT NA   | NA |
| 80  | 117 VDILHLFYRS NA  | NA |
| 76  | 80 VDILHLSGTV NA   | NA |
| 73  | 62 VDILHLQRHI NA   | NA |
| 157 | 185 VDILHLRQRH NA  | NA |
| 40  | 40 VDILHLHMIR NA   | NA |
| 42  | 51 VQLRSLAYEQ NA   | NA |
| 21  | 27 QVPVFLD TT NA   | NA |
| 24  | 29 LPALNMQSMF NA   | NA |
| 34  | 29 LPALNMLYHK NA   | NA |
| 30  | 40 LPALNMRNKG NA   | NA |
| 35  | 47 LPALNMQQWG NA   | NA |
| 53  | 76 GKVQGLKVRH NA   | NA |
| 74  | 101 GKYQGLKVRK NA  | NA |
| 74  | 80 TWIQGLKVRK NA   | NA |
| 47  | 62 KRVQGLKVRI NA   | NA |
| 50  | 54 IMIQGLKVRY NA   | NA |
| 99  | 144 DQPQGLKVRG NA  | NA |
| 80  | 79 NSAQGLKVRV NA   | NA |
| 22  | 40 VIVQGLKVRG NA   | NA |
| 84  | 103 QNIQGLKVRA NA  | NA |
| 35  | 49 IGYAWMKGNK NA   | NA |
| 24  | 44 IGYAWMHKIT NA   | NA |
| 20  | 29 IGYAWMFMQH NA   | NA |

|     |     |               |    |
|-----|-----|---------------|----|
| 79  | 74  | IGYAWMHVGR NA | NA |
| 84  | 92  | IQLAWLHNWQ NA | NA |
| 43  | 62  | IQLAWLHMAT NA | NA |
| 22  | 25  | SSYAHLKYSI NA | NA |
| 30  | 35  | SSYAHLRMHS NA | NA |
| 27  | 28  | SSYAHLFVQT NA | NA |
| 19  | 30  | SSYAHLANRI NA | NA |
| 29  | 28  | VFYQSLAYWT NA | NA |
| 16  | 27  | VFYQSLFRGI NA | NA |
| 10  | 16  | VFYQSLKVPH NA | NA |
| 32  | 32  | VFYQSLFGGA NA | NA |
| 24  | 27  | VFYQSLSGPR NA | NA |
| 64  | 111 | VFYQSLRMLH NA | NA |
| 42  | 33  | VFYQSLQKQY NA | NA |
| 165 | 230 | NAALHLREGQ NA | NA |
| 99  | 153 | GHALHLRERR NA | NA |
| 126 | 149 | QNALHLREGG NA | NA |
| 143 | 177 | NHALHLREQW NA | NA |
| 42  | 49  | GFALHLREKA NA | NA |
| 3   | 7   | GDALHLREKI NA | NA |
| 51  | 100 | YPALHLREGT NA | NA |
| 154 | 202 | HHALHLRESR NA | NA |
| 54  | 59  | DFALHLRETG NA | NA |
| 130 | 153 | GMALHLREWT NA | NA |
| 78  | 77  | SVPQWIHDWY NA | NA |
| 34  | 42  | EVPQWIHNQA NA | NA |
| 45  | 71  | NVPQWIHNLK NA | NA |
| 77  | 73  | YVPQWIHALS NA | NA |
| 61  | 81  | CVPQWIHGKY NA | NA |
| 22  | 38  | VVPQWIHMMS NA | NA |
| 91  | 84  | TVPQWIHYPG NA | NA |
| 67  | 94  | RVPQWIHYRT NA | NA |
| 67  | 109 | FVPQWIHDWS NA | NA |
| 63  | 88  | PMARYLALKQ NA | NA |
| 35  | 34  | PMARYLFQVG NA | NA |
| 112 | 112 | NFPMSLRGIR NA | NA |
| 43  | 59  | NFPMSLRLMH NA | NA |
| 116 | 138 | NFPMSLRSGS NA | NA |
| 38  | 46  | TRPQHLALAV NA | NA |
| 29  | 62  | TRPQHLLKGR NA | NA |
| 40  | 43  | TRPQHLLVTG NA | NA |

|     |                   |    |
|-----|-------------------|----|
| 10  | 15 TRPQHLSSVG NA  | NA |
| 89  | 116 TRPQHLYLAL NA | NA |
| 83  | 84 YYAFHILGHQ NA  | NA |
| 28  | 48 NPAFHILGTW NA  | NA |
| 15  | 24 TPAFHILGGG NA  | NA |
| 17  | 27 NMAFHILGTQ NA  | NA |
| 30  | 24 VMAFHILGIL NA  | NA |
| 103 | 128 IKAFHILGAW NA | NA |
| 17  | 10 IFAFHILGSS NA  | NA |
| 61  | 66 NIAFHILGWH NA  | NA |
| 40  | 57 GYAFHILGMG NA  | NA |
| 101 | 123 CTAFHILGNG NA | NA |
| 28  | 37 QQAFHILGGI NA  | NA |
| 38  | 50 QIAAWLKKIG NA  | NA |
| 105 | 127 SRYAWLKKIH NA | NA |
| 22  | 27 GPYAWLKKIH NA  | NA |
| 52  | 70 QWAAWLKKIQ NA  | NA |
| 23  | 21 QRANSIRGGF NA  | NA |
| 20  | 20 QRANSIRVTW NA  | NA |
| 4   | 16 QRANSILLSA NA  | NA |
| 18  | 18 KRAASLKRPT NA  | NA |
| 59  | 72 KRAASLLGSV NA  | NA |
| 19  | 37 KRAASLFDVK NA  | NA |
| 30  | 46 KRAASLAVQS NA  | NA |
| 34  | 28 KRAASLYSLF NA  | NA |
| 38  | 31 KRAASLQSAA NA  | NA |
| 137 | 180 KRAASLLLSW NA | NA |
| 46  | 55 KRAASLSLVK NA  | NA |
| 97  | 127 ANAMNLRRQW NA | NA |
| 71  | 89 ANAMNLKGVV NA  | NA |
| 49  | 59 ANAMNLRNSW NA  | NA |
| 72  | 76 ANAMNLKMSV NA  | NA |
| 37  | 41 ANAMNLANGY NA  | NA |
| 28  | 35 ANAMNLFDTA NA  | NA |
| 59  | 68 VRHQSLRGVF NA  | NA |
| 127 | 157 GRHQSLRMMS NA | NA |
| 46  | 46 WRHQSLRGGQ NA  | NA |
| 92  | 118 KRHQSLRMLR NA | NA |
| 100 | 111 FRHQSLRQKA NA | NA |
| 204 | 260 RRHQSLRVRF NA | NA |
| 49  | 48 KRHQSLRNNQ NA  | NA |

|     |                   |    |
|-----|-------------------|----|
| 47  | 75 RRHQSLRNIT NA  | NA |
| 43  | 49 YATWSMAANV NA  | NA |
| 15  | 18 YATWSMKNTF NA  | NA |
| 62  | 68 KRVLHLRVIK NA  | NA |
| 40  | 56 GRVLHLRRGK NA  | NA |
| 53  | 65 GRVLHLRNNA NA  | NA |
| 92  | 127 MRVLHLRRHQ NA | NA |
| 80  | 87 SRVLHLRAGL NA  | NA |
| 69  | 87 TRVLHLRMTV NA  | NA |
| 45  | 39 KRVLHLRYTI NA  | NA |
| 38  | 60 WRVLHLRQWS NA  | NA |
| 59  | 81 YRVLHLRGVS NA  | NA |
| 153 | 196 KRVLHLRYNH NA | NA |
| 42  | 59 GRVLHLRMEW NA  | NA |
| 53  | 68 SDIRWLLVIF NA  | NA |
| 55  | 83 SDIRWLMKLA NA  | NA |
| 76  | 91 SDIRWLLVMW NA  | NA |
| 70  | 89 SDIRWLMAHT NA  | NA |
| 85  | 129 SDIRWLLKIH NA | NA |
| 40  | 53 EVTMWLFRGY NA  | NA |
| 46  | 48 EVTMWLASKT NA  | NA |
| 51  | 53 EVTMWLALTI NA  | NA |
| 95  | 121 EVTMWLHYNA NA | NA |
| 57  | 86 EVTMWLRQHH NA  | NA |
| 38  | 53 EVTMWLKLGK NA  | NA |
| 54  | 70 GPYQGLRMGV NA  | NA |
| 101 | 109 CMIQGLRMGF NA | NA |
| 85  | 128 GYGQGLRMGY NA | NA |
| 81  | 101 IQVQGLRMGW NA | NA |
| 191 | 231 MSHQGLRMGS NA | NA |
| 117 | 130 KPIQGLRMGQ NA | NA |
| 85  | 115 GSHQGLRMGS NA | NA |
| 108 | 116 NIYQGLRMGI NA | NA |
| 71  | 92 TFYQGLRMGG NA  | NA |
| 36  | 39 VKAQHLHQMY NA  | NA |
| 63  | 78 VKAQHLMNPL NA  | NA |
| 5   | 9 VKAQHLQSIY NA   | NA |
| 39  | 45 VKAQHLMAKT NA  | NA |
| 15  | 18 VKAQHLHDKY NA  | NA |
| 39  | 31 VKAQHLYNGW NA  | NA |
| 44  | 45 HWPRFLKAPR NA  | NA |

|     |     |                |    |
|-----|-----|----------------|----|
| 30  | 25  | HWPFRLLVSG NA  | NA |
| 78  | 103 | HWPFRFLKASQ NA | NA |
| 56  | 75  | HWPFRLLGEW NA  | NA |
| 46  | 48  | SKIRFLYMTL NA  | NA |
| 61  | 73  | SKIRFLSRTW NA  | NA |
| 33  | 42  | SKIRFLKVEG NA  | NA |
| 36  | 53  | SKIRFLFYSF NA  | NA |
| 72  | 75  | SKIRFLMMRI NA  | NA |
| 35  | 27  | SKIRFLLAWG NA  | NA |
| 53  | 64  | SKIRFLKKHR NA  | NA |
| 21  | 28  | SKIRFLHAET NA  | NA |
| 98  | 94  | SKIRFLFLEI NA  | NA |
| 57  | 62  | TAVRSLRRWK NA  | NA |
| 9   | 21  | RGPVFLQVA NA   | NA |
| 37  | 29  | RGPVFLGLL NA   | NA |
| 128 | 160 | HLFQWLHGHI NA  | NA |
| 26  | 35  | HLFQWLLAWI NA  | NA |
| 42  | 49  | QYVLALKMGG NA  | NA |
| 51  | 75  | MIFLALKMGW NA  | NA |
| 258 | 316 | NHALALKMGS NA  | NA |
| 26  | 23  | KMPRWIKAPG NA  | NA |
| 58  | 75  | VNVRNLKSVQ NA  | NA |
| 57  | 81  | DYARAMASHH NA  | NA |
| 38  | 39  | DYARAMQONLY NA | NA |
| 62  | 70  | MVVRHLLDER NA  | NA |
| 102 | 131 | MVVRHLKMQS NA  | NA |
| 107 | 180 | MVVRHLHVKV NA  | NA |
| 44  | 51  | MVVRHLHKRA NA  | NA |
| 26  | 50  | ARAQHIAKPR NA  | NA |
| 42  | 65  | ARAQHIQSKG NA  | NA |
| 192 | 248 | ARAQHIYSHG NA  | NA |
| 46  | 72  | ARAQHIYKLQ NA  | NA |
| 84  | 104 | ARAQHIFRNL NA  | NA |
| 83  | 105 | ARAQHIMGHG NA  | NA |
| 49  | 62  | ARAQHIADHA NA  | NA |
| 79  | 85  | ARAQHIYATK NA  | NA |
| 65  | 76  | ARAQHIRGVK NA  | NA |
| 54  | 54  | NTFLHLLYWR NA  | NA |
| 57  | 73  | SLPAHILKHA NA  | NA |
| 35  | 58  | SLPAHIAYRG NA  | NA |
| 31  | 65  | SLPAHIQYES NA  | NA |

|     |     |             |    |    |
|-----|-----|-------------|----|----|
| 137 | 167 | SLPAHIRNRR  | NA | NA |
| 99  | 101 | SLPAHIHRWG  | NA | NA |
| 69  | 73  | WLYAHYFVKG  | NA | NA |
| 57  | 57  | WLYAHYFAVG  | NA | NA |
| 62  | 54  | GGHQWLRVTI  | NA | NA |
| 41  | 50  | NGHQWLRRAAI | NA | NA |
| 71  | 82  | IGHQWLRMGG  | NA | NA |
| 69  | 65  | PGHQWLRQTY  | NA | NA |
| 67  | 61  | DGHQWLRKKGK | NA | NA |
| 154 | 161 | DGHQWLRYAR  | NA | NA |
| 143 | 190 | DGHQWLRRLWQ | NA | NA |
| 72  | 77  | RGHQWLRKQT  | NA | NA |
| 60  | 84  | VGHQWLRKGY  | NA | NA |
| 62  | 69  | GGHQWLRGQQ  | NA | NA |
| 21  | 25  | ERLLHLKLMG  | NA | NA |
| 96  | 95  | ERLLHLRREA  | NA | NA |
| 87  | 88  | ERLLHLFGST  | NA | NA |
| 65  | 52  | ERLLHLKYTV  | NA | NA |
| 109 | 118 | VMHQNLAGRR  | NA | NA |
| 6   | 17  | VMHQNLMSSG  | NA | NA |
| 77  | 80  | VMHQNLHRVG  | NA | NA |
| 56  | 66  | VMHQNLSVVQ  | NA | NA |
| 55  | 44  | VMHQNLRGTY  | NA | NA |
| 66  | 83  | VMHQNLFYEW  | NA | NA |
| 38  | 36  | VMHQNLQGHA  | NA | NA |
| 55  | 79  | VMHQNLYLEK  | NA | NA |
| 10  | 11  | SRPLNLQNEF  | NA | NA |
| 48  | 55  | SRPLNLANIA  | NA | NA |
| 42  | 56  | SRPLNLRDGI  | NA | NA |
| 76  | 96  | MDLLSLAVTR  | NA | NA |
| 9   | 22  | MDLLSLFLWR  | NA | NA |
| 44  | 41  | MDLLSLKPG   | NA | NA |
| 143 | 170 | MDLLSLRAAL  | NA | NA |
| 20  | 30  | VQPAALQSMT  | NA | NA |
| 39  | 63  | FQPAALQSRV  | NA | NA |
| 39  | 38  | AFPAALQSAV  | NA | NA |
| 53  | 68  | YWPAALQSMG  | NA | NA |
| 41  | 32  | RWPAALQSLI  | NA | NA |
| 27  | 30  | IIPAALQSPK  | NA | NA |
| 29  | 36  | YDPAALQSGI  | NA | NA |
| 29  | 30  | SIPAALQSEA  | NA | NA |

|     |     |               |    |
|-----|-----|---------------|----|
| 39  | 45  | YTPAALQSRH NA | NA |
| 10  | 13  | PAPAALQSQY NA | NA |
| 48  | 51  | TKPAALQSTH NA | NA |
| 217 | 246 | CLLASLHLKW NA | NA |
| 56  | 64  | TTALWLYYST NA | NA |
| 47  | 101 | TTALWLALRY NA | NA |
| 58  | 65  | TTALWLYMRK NA | NA |
| 63  | 84  | TTALWLKKGW NA | NA |
| 30  | 32  | TTALWLQGTI NA | NA |
| 11  | 24  | TTALWLKSS NA  | NA |
| 22  | 28  | TTALWLAAMH NA | NA |
| 34  | 39  | AMAHSLFADF NA | NA |
| 40  | 46  | AMAHSLYGIL NA | NA |
| 70  | 82  | AMAHSLHSHL NA | NA |
| 31  | 23  | AMAHSLFKST NA | NA |
| 47  | 66  | AMAHSLANHH NA | NA |
| 6   | 12  | AMAHSLASGG NA | NA |
| 44  | 60  | AMAHSLRGMV NA | NA |
| 52  | 52  | AMAHSLMAKV NA | NA |
| 40  | 53  | FFHRSIRSGW NA | NA |
| 52  | 58  | MFHRSIRKET NA | NA |
| 100 | 107 | AFHRSIRSPV NA | NA |
| 31  | 37  | SFHRSIRSAA NA | NA |
| 144 | 170 | CFHRSIRVWV NA | NA |
| 182 | 214 | YFHRSIRSGW NA | NA |
| 72  | 91  | PFHRSIRNGA NA | NA |
| 106 | 123 | CFHRSIRKHK NA | NA |
| 60  | 76  | LFHRSIRVWG NA | NA |
| 53  | 54  | MFHRSIRALI NA | NA |
| 46  | 62  | NDLAHILYMK NA | NA |
| 50  | 35  | NDLAHIKRNY NA | NA |
| 47  | 48  | NDLAHILYNY NA | NA |
| 64  | 78  | NDLAHIHRSH NA | NA |
| 29  | 34  | KVLASLHAFV NA | NA |
| 119 | 193 | TLPHSLHSGW NA | NA |
| 29  | 58  | TLPHSLHGIT NA | NA |
| 70  | 81  | DDVRHIFMKA NA | NA |
| 35  | 45  | NDVRHIFSWW NA | NA |
| 83  | 128 | HDVRHIFRWV NA | NA |
| 44  | 72  | ADVRHIFGGK NA | NA |
| 40  | 53  | DDVRHIFDRL NA | NA |



|     |                    |    |
|-----|--------------------|----|
| 30  | 27 TDVRHIFLRV NA   | NA |
| 85  | 90 EDVRHIFMAY NA   | NA |
| 33  | 39 SDVRHIFSTG NA   | NA |
| 92  | 97 HDVRHIFDRQ NA   | NA |
| 64  | 63 GDVRHIFLAL NA   | NA |
| 52  | 71 SRVLPLRNGR NA   | NA |
| 106 | 119 FMYSHLFKEL NA  | NA |
| 64  | 78 FMYSHLHSES NA   | NA |
| 183 | 236 FMYSHLHGMW NA  | NA |
| 97  | 116 FMYSHLHVIG NA  | NA |
| 27  | 40 NHAHHLVDVS NA   | NA |
| 132 | 166 GHAAHLYGRA NA  | NA |
| 181 | 222 QHAAHLYLMR NA  | NA |
| 69  | 90 VHAHHLYNRY NA   | NA |
| 58  | 79 THAAHLYSAI NA   | NA |
| 103 | 123 NHAHHLYLEL NA  | NA |
| 173 | 188 IHAHHLYNGW NA  | NA |
| 114 | 100 QHAAHLYGGQ NA  | NA |
| 170 | 198 YHAAHLYRHL NA  | NA |
| 181 | 193 HHAHHLYMWT NA  | NA |
| 82  | 98 SHAAHLYVVG NA   | NA |
| 112 | 119 EHHMHMRSNV NA  | NA |
| 120 | 141 PSHMHMRSV NA   | NA |
| 168 | 192 PMHMHMRSMG NA  | NA |
| 231 | 286 I IHMHMRSRW NA | NA |
| 108 | 109 DDHMHMRSAS NA  | NA |
| 105 | 144 KTHMHMRSTV NA  | NA |
| 54  | 58 VTHMHMRSSG NA   | NA |
| 282 | 361 WTHMHMRSWS NA  | NA |
| 117 | 152 FPHMHMRSHT NA  | NA |
| 45  | 58 KWPVSLRMWA NA   | NA |
| 35  | 44 QWPVSLRMEG NA   | NA |
| 67  | 100 RYPVSLRMGH NA  | NA |
| 43  | 51 MQPVSLRMLQ NA   | NA |
| 42  | 56 GKPVSLRMPV NA   | NA |
| 29  | 45 QNPVSLRMQG NA   | NA |
| 73  | 107 HFPVSLRMGG NA  | NA |
| 50  | 62 SRPVSLRMMG NA   | NA |
| 68  | 111 EMPVSLRMWG NA  | NA |
| 32  | 47 ASPVSLRMRK NA   | NA |
| 91  | 99 HMARGIKLHA NA   | NA |

|     |     |               |    |
|-----|-----|---------------|----|
| 14  | 35  | WRARGIKLST NA | NA |
| 55  | 81  | RPARGIKLHL NA | NA |
| 52  | 64  | YSARGIKLWR NA | NA |
| 30  | 41  | VIARGIKLAF NA | NA |
| 46  | 65  | MMARGIKLKI NA | NA |
| 69  | 106 | PTARGIKLST NA | NA |
| 44  | 58  | AFARGIKLVG NA | NA |
| 51  | 52  | VAARGIKLWI NA | NA |
| 27  | 26  | QSARGIKLST NA | NA |
| 73  | 82  | VTARGIKLWQ NA | NA |
| 177 | 287 | VEAHALRLGQ NA | NA |
| 107 | 128 | VEAHALHDPR NA | NA |
| 71  | 94  | VEAHALLRAV NA | NA |
| 22  | 18  | ELAWHLLQMS NA | NA |
| 99  | 138 | ELAWHLFAHA NA | NA |
| 71  | 93  | ELAWHLLLWT NA | NA |
| 70  | 59  | ELAWHLFMKG NA | NA |
| 122 | 150 | ELAWHLKGAQ NA | NA |
| 18  | 30  | ELAWHLALQW NA | NA |
| 39  | 53  | FEAWHLFKKF NA | NA |
| 117 | 170 | AEAWHLFSIA NA | NA |
| 38  | 58  | REAWHLFLEY NA | NA |
| 64  | 102 | PEAWHLFDPY NA | NA |
| 55  | 45  | GEAWHLFYLY NA | NA |
| 78  | 93  | NEAWHLFSKL NA | NA |
| 50  | 91  | AEAWHLFGIT NA | NA |
| 157 | 165 | HEAWHLFRLI NA | NA |
| 25  | 39  | VEAWHLFGVF NA | NA |
| 136 | 175 | NRHMALHRPG NA | NA |
| 108 | 126 | EWIQALHRPG NA | NA |
| 78  | 97  | WTYMALHRPG NA | NA |
| 55  | 62  | RIYAALHRPG NA | NA |
| 138 | 134 | WNHHALHRPG NA | NA |
| 42  | 72  | SPAHGLFRRH NA | NA |
| 25  | 29  | SPAHGLQDGI NA | NA |
| 60  | 69  | SPAHGLHAQV NA | NA |
| 42  | 47  | SPAHGLHDVA NA | NA |
| 86  | 102 | KAHFALREKV NA | NA |
| 145 | 188 | EYVQALREKV NA | NA |
| 30  | 42  | QRVLPLRGLS NA | NA |
| 58  | 60  | QRVLPLLSQ NA  | NA |

|     |                    |    |
|-----|--------------------|----|
| 57  | 57 RNVNFLRAGW NA   | NA |
| 8   | 8 RNVNFLRRTS NA    | NA |
| 43  | 36 RNVNFLRSQI NA   | NA |
| 44  | 64 RNVNFLRYGG NA   | NA |
| 45  | 47 YYASHLFGEA NA   | NA |
| 58  | 70 YYASHLHGPI NA   | NA |
| 10  | 27 RRVLALQQEL NA   | NA |
| 66  | 74 RRVLALFVSG NA   | NA |
| 49  | 77 YSALPMRLQT NA   | NA |
| 58  | 79 NSHMALQANL NA   | NA |
| 17  | 31 NSHMALSAVS NA   | NA |
| 37  | 38 NSHMALAVWQ NA   | NA |
| 33  | 34 NSHMALSGEV NA   | NA |
| 79  | 79 NSHMALKYNG NA   | NA |
| 23  | 43 NSHMALLVQY NA   | NA |
| 307 | 427 NSHMALRAVQ NA  | NA |
| 8   | 13 NSHMALYYGH NA   | NA |
| 51  | 55 GQPNFLKQKQ NA   | NA |
| 53  | 40 GQPNFLLSQV NA   | NA |
| 46  | 82 RWPAWLQNVQ NA   | NA |
| 88  | 88 RWPAWLRLGK NA   | NA |
| 84  | 119 RWPAWLFQLH NA  | NA |
| 88  | 90 RWPAWLLVHG NA   | NA |
| 61  | 60 RWPAWLQKEQ NA   | NA |
| 51  | 49 RWPAWLLMGW NA   | NA |
| 80  | 88 PKPQNLRVAG NA   | NA |
| 58  | 82 MKPQNLRRLNK NA  | NA |
| 79  | 80 YKPQNLRVGK NA   | NA |
| 77  | 95 IKPQNLRDIG NA   | NA |
| 64  | 77 FKPQNLRGPL NA   | NA |
| 67  | 88 GKPQNLRNWL NA   | NA |
| 60  | 83 GKPQNLRGSQ NA   | NA |
| 80  | 99 LKPQNLRQSV NA   | NA |
| 91  | 129 DKPQNLRSGS NA  | NA |
| 90  | 98 QKPQNLRYGK NA   | NA |
| 130 | 173 MKPQNLRRLNF NA | NA |
| 102 | 104 NMARSLSVWK NA  | NA |
| 107 | 152 NHHNSLKRRRI NA | NA |
| 41  | 40 SIPNSLKRRRT NA  | NA |
| 195 | 237 ANPNSLKRRR NA  | NA |
| 230 | 239 MDVNSLKRRRA NA | NA |

|     |     |            |    |    |
|-----|-----|------------|----|----|
| 556 | 685 | CWYNSLKRRW | NA | NA |
| 73  | 71  | WSINSLKRRK | NA | NA |
| 115 | 181 | LYHAPLRARL | NA | NA |
| 83  | 124 | SRPQPLRARL | NA | NA |
| 75  | 100 | WMYAPLHQTK | NA | NA |
| 56  | 78  | HKIALLMYMW | NA | NA |
| 71  | 73  | HKIALLQKIA | NA | NA |
| 34  | 32  | HKIALLQSVR | NA | NA |
| 18  | 18  | TSPGLLLSAF | NA | NA |
| 33  | 26  | TSPGLLVGAS | NA | NA |
| 56  | 59  | MPMGRLINSK | NA | NA |
| 41  | 53  | EHPGLLLGAT | NA | NA |
| 51  | 53  | EHPGLLVRET | NA | NA |
| 50  | 67  | EHPGLLVGMH | NA | NA |
| 67  | 108 | PSLAELHKMW | NA | NA |
| 69  | 69  | PSLAELQSVQ | NA | NA |
| 36  | 56  | PSLAELTVHG | NA | NA |
| 27  | 44  | EAIGRLLSPI | NA | NA |
| 47  | 64  | EAIGRLVGPR | NA | NA |
| 55  | 63  | EAIGRLYVTK | NA | NA |
| 47  | 39  | EAIGRLMAEF | NA | NA |
| 60  | 50  | EAIGRLKMNW | NA | NA |
| 69  | 76  | EAIGRLTDRH | NA | NA |
| 40  | 60  | EAIGRLQDQV | NA | NA |
| 141 | 166 | EAIGRLRRVQ | NA | NA |
| 55  | 52  | PSLGQLTYVQ | NA | NA |
| 38  | 49  | PSLGQLVGGI | NA | NA |
| 38  | 23  | PSLGQLWSPG | NA | NA |
| 38  | 52  | PSLGQLTRIG | NA | NA |
| 70  | 73  | PSLGQLLKNQ | NA | NA |
| 59  | 58  | PSLGQLAYEV | NA | NA |
| 95  | 96  | PSLGQLLKNW | NA | NA |
| 52  | 66  | HVVAKMASHG | NA | NA |
| 36  | 39  | HVVAKMVKNA | NA | NA |
| 72  | 65  | HVVAKMANMR | NA | NA |
| 44  | 40  | HVVAKMQRSS | NA | NA |
| 56  | 50  | HVVAKMALAH | NA | NA |
| 49  | 69  | VKPSKLQGGY | NA | NA |
| 9   | 18  | RKLAFLQSVY | NA | NA |
| 45  | 49  | RKLAFLTGAG | NA | NA |
| 15  | 19  | TVLGNLLLWI | NA | NA |

|     |                   |    |
|-----|-------------------|----|
| 26  | 33 TVLGNLIDPY NA  | NA |
| 59  | 55 TVLGNLHSGL NA  | NA |
| 34  | 31 TVLGNLIGQG NA  | NA |
| 73  | 87 TVLGNLMKRA NA  | NA |
| 17  | 20 MALSSLVGAG NA  | NA |
| 22  | 38 MALSSLAVR NA   | NA |
| 45  | 54 MALSSLHAWI NA  | NA |
| 26  | 32 MALSSLQSNW NA  | NA |
| 8   | 11 MALSSLQLET NA  | NA |
| 60  | 67 KRLAFLTGRF NA  | NA |
| 28  | 28 FQIGSLYGAY NA  | NA |
| 8   | 24 FQIGSLYYSS NA  | NA |
| 35  | 40 FQIGSLQAIH NA  | NA |
| 30  | 40 RVVANLVVPH NA  | NA |
| 82  | 107 WYPSKLQYNF NA | NA |
| 29  | 55 KQLASLVNII NA  | NA |
| 48  | 82 KQLASLLRIG NA  | NA |
| 69  | 74 KQLASLTASQ NA  | NA |
| 57  | 75 KQLASLLSGF NA  | NA |
| 74  | 72 KMPSTLQRGR NA  | NA |
| 59  | 82 EWPSRMQYGI NA  | NA |
| 31  | 36 ILLSPLQSVT NA  | NA |
| 4   | 7 ILLSPLLRSK NA   | NA |
| 32  | 42 ILLSPLVVPT NA  | NA |
| 22  | 25 ILLSPLLGNS NA  | NA |
| 7   | 7 SSVSNLTRPY NA   | NA |
| 17  | 20 SSVSNLSLPH NA  | NA |
| 51  | 62 PTLQYLTGIF NA  | NA |
| 41  | 40 PTLQYLLGIQ NA  | NA |
| 53  | 77 PTLQYLAREL NA  | NA |
| 56  | 62 PTLQYLLGLA NA  | NA |
| 107 | 118 PTLQYLLGHW NA | NA |
| 4   | 3 PTLQYLILQF NA   | NA |
| 14  | 20 PTLQYLISQG NA  | NA |
| 95  | 99 PTLQYLARGL NA  | NA |
| 84  | 106 PTLQYLLRQY NA | NA |
| 53  | 49 WAINALVLSA NA  | NA |
| 60  | 59 FKAVALKWA NA   | NA |
| 78  | 108 FKAVLVQES NA  | NA |
| 23  | 22 QRPMDLIAS NA   | NA |
| 49  | 54 TPPVELQLPV NA  | NA |

|     |                   |    |
|-----|-------------------|----|
| 37  | 38 PQMGSLVAGT NA  | NA |
| 22  | 43 PQMGSLTLKH NA  | NA |
| 29  | 28 PQMGSLQLHV NA  | NA |
| 77  | 96 PQMGSLLYVH NA  | NA |
| 31  | 37 PQMGSLIASQ NA  | NA |
| 105 | 122 MSLATLHQGW NA | NA |
| 81  | 98 MSLATLHLPY NA  | NA |
| 52  | 75 MSLATLHSQQ NA  | NA |
| 37  | 60 SVPSTLQSVG NA  | NA |
| 30  | 39 YIVGNLTVKT NA  | NA |
| 49  | 53 VYPGKMQAEG NA  | NA |
| 39  | 73 VYPGKMHKSK NA  | NA |
| 51  | 59 VYPGKMQVGT NA  | NA |
| 35  | 52 SQLGLLSSAQ NA  | NA |
| 25  | 43 SQLGLLQQGS NA  | NA |
| 29  | 31 SQLGLLADV F NA | NA |
| 21  | 20 SQLGLLISLH NA  | NA |
| 64  | 60 SQLGLLIAHA NA  | NA |
| 40  | 61 SQLGLLVGGL NA  | NA |
| 45  | 57 SQLGLLYVQA NA  | NA |
| 65  | 52 SQLGLLWYAS NA  | NA |
| 69  | 70 SQLGLLTVGR NA  | NA |
| 62  | 78 SQLGLLKLAF NA  | NA |
| 46  | 55 RDLGFLTNVW NA  | NA |
| 27  | 38 RDLGFLYAGF NA  | NA |
| 22  | 31 RDLGFLTGML NA  | NA |
| 54  | 63 RDLGFLTKHV NA  | NA |
| 28  | 39 RDLGFLMVL T NA | NA |
| 45  | 53 SVLSKLLVLT NA  | NA |
| 54  | 54 SVLSKLLYAG NA  | NA |
| 38  | 52 SVLSKLLLII NA  | NA |
| 65  | 76 SVLSKLHATW NA  | NA |
| 132 | 156 TMLLALSKRY NA | NA |
| 46  | 73 TMLLALSYPW NA  | NA |
| 52  | 58 TMLLALQSKV NA  | NA |
| 46  | 65 TMLLALTYLG NA  | NA |
| 42  | 59 TMLLALTMSL NA  | NA |
| 37  | 59 TMLLALQAEL NA  | NA |
| 99  | 129 TMLLALSMWK NA | NA |
| 85  | 115 TMLLALTRRG NA | NA |
| 46  | 65 FEPQRMLLQK NA  | NA |

|     |                   |    |
|-----|-------------------|----|
| 36  | 33 FEPQRMQSSS NA  | NA |
| 82  | 110 FEPQRMAGRV NA | NA |
| 52  | 75 FEPQRMANNH NA  | NA |
| 62  | 66 FEPQRMTLPR NA  | NA |
| 55  | 56 FEPQRMQNKG NA  | NA |
| 19  | 38 EGPMRLQMSG NA  | NA |
| 33  | 42 EGPMRLKALS NA  | NA |
| 34  | 55 EGPMRLAGNW NA  | NA |
| 82  | 99 EGPMRLAKRK NA  | NA |
| 41  | 54 EGPMRLQVRI NA  | NA |
| 43  | 56 EGPMRLRSQI NA  | NA |
| 80  | 98 EGPMRLMRQA NA  | NA |
| 33  | 41 EGPMRLYGTG NA  | NA |
| 28  | 37 RLPINLVGIR NA  | NA |
| 51  | 76 RLPINLVQWV NA  | NA |
| 32  | 26 ARIEYLQSPW NA  | NA |
| 38  | 35 ARIEYLIGNV NA  | NA |
| 28  | 29 ARIEYLTQMS NA  | NA |
| 52  | 37 ARIEYLIVHA NA  | NA |
| 24  | 33 ARIEYLLNSG NA  | NA |
| 32  | 39 ARIEYLIVES NA  | NA |
| 23  | 24 PRVEALVDVG NA  | NA |
| 35  | 37 WVMESLVGNG NA  | NA |
| 31  | 37 WVMESLQGQH NA  | NA |
| 67  | 79 WVMESLKSKA NA  | NA |
| 46  | 56 TTYMSLVVIK NA  | NA |
| 88  | 115 HRLLSLMVSV NA | NA |
| 65  | 88 HRLLSLVYLF NA  | NA |
| 130 | 172 HRLLSLSDWH NA | NA |
| 83  | 91 HRLLSLQSTG NA  | NA |
| 55  | 48 YPFGSLVDGG NA  | NA |
| 55  | 65 ARLGYLQYWQ NA  | NA |
| 74  | 93 ARLGYLTRGR NA  | NA |
| 54  | 56 ARLGYLQYQV NA  | NA |
| 35  | 41 NRVEMLVYGY NA  | NA |
| 48  | 53 NRVEMLTSLW NA  | NA |
| 17  | 21 RTAHLNIMEY NA  | NA |
| 49  | 66 RTAHLNVANA NA  | NA |
| 55  | 52 RTAHLNIGNA NA  | NA |
| 46  | 70 RTAHLNMVRA NA  | NA |
| 63  | 77 RTAHLNQVHG NA  | NA |

|     |     |               |    |
|-----|-----|---------------|----|
| 29  | 49  | RTAHNLMMPF NA | NA |
| 29  | 20  | RTAHNLYNGT NA | NA |
| 53  | 56  | WPMAKLLYMY NA | NA |
| 29  | 33  | WPMAKLQLGG NA | NA |
| 66  | 85  | WPMAKLVQLL NA | NA |
| 40  | 47  | WPMAKLLSVY NA | NA |
| 57  | 60  | WPMAKLYYGG NA | NA |
| 32  | 39  | RAIKSLRVLK NA | NA |
| 12  | 20  | SNLNSMSNQV NA | NA |
| 140 | 168 | EHFHQLRIGL NA | NA |
| 52  | 36  | TKMAWLTDV NA  | NA |
| 34  | 26  | PHTASLTSQK NA | NA |
| 25  | 31  | FMPAQQLSMQ NA | NA |
| 48  | 35  | FMPAQQGPQ NA  | NA |
| 45  | 62  | FMPAQAMNQ NA  | NA |
| 45  | 56  | MSLGYLLNAG NA | NA |
| 17  | 22  | MSLGYLQVGK NA | NA |
| 22  | 22  | MSLGYLQKQY NA | NA |
| 23  | 44  | DKLASLVVSR NA | NA |
| 43  | 43  | DKLASLTARS NA | NA |
| 16  | 16  | YDISALQQIG NA | NA |
| 71  | 127 | YDISALHMHR NA | NA |
| 35  | 38  | YDISALQGRG NA | NA |
| 56  | 77  | WIVGMLQMPL NA | NA |
| 80  | 99  | DIVGMLQGVH NA | NA |
| 44  | 77  | VIVGMLQKPS NA | NA |
| 28  | 48  | GIVGMLQGGY NA | NA |
| 123 | 165 | QIVGMLQYHF NA | NA |
| 51  | 54  | HIVGMLQNGG NA | NA |
| 68  | 66  | PIVGMLQDGH NA | NA |
| 31  | 38  | AIVGMLQMLA NA | NA |
| 78  | 87  | NIVGMLQGEV NA | NA |
| 74  | 81  | GIVGMLQKLG NA | NA |
| 44  | 60  | YDIHFLQGGW NA | NA |
| 61  | 57  | YDIHFLVGHG NA | NA |
| 39  | 46  | YDIHFLVNGF NA | NA |
| 29  | 28  | YDIHFLYDKG NA | NA |
| 32  | 29  | YDIHFLMDNS NA | NA |
| 27  | 24  | FDAQSLISAT NA | NA |
| 48  | 52  | FDAQSLIMWS NA | NA |
| 78  | 91  | HRQQNLTGHG NA | NA |



|     |                   |    |
|-----|-------------------|----|
| 28  | 32 YMVINLTMGS NA  | NA |
| 36  | 53 QRMASLVNIW NA  | NA |
| 34  | 42 QRMASLTSKQ NA  | NA |
| 42  | 54 QRMASLVDPT NA  | NA |
| 26  | 23 VFVSNLSGQG NA  | NA |
| 29  | 42 VFVSNLVMTW NA  | NA |
| 26  | 34 VFVSNLVSGI NA  | NA |
| 46  | 56 AKVMSLQANS NA  | NA |
| 22  | 21 AKVMSLQGLQ NA  | NA |
| 25  | 45 AKVMSLQLRQ NA  | NA |
| 91  | 81 FKVEYLVGKL NA  | NA |
| 95  | 97 MKVEYLVVGH NA  | NA |
| 72  | 97 CKVEYLVAKF NA  | NA |
| 44  | 42 RKVEYLVGTA NA  | NA |
| 137 | 158 CKVEYLVGHG NA | NA |
| 61  | 85 SKVEYLVNPQ NA  | NA |
| 103 | 109 HKVEYLVKKV NA | NA |
| 596 | 749 MKVEYLVRRW NA | NA |
| 53  | 82 KWVSMLTSSV NA  | NA |
| 66  | 80 KWVSMLMYEV NA  | NA |
| 97  | 105 KWVSMLARMS NA | NA |
| 100 | 114 KWVSMLSQTL NA | NA |
| 50  | 82 KWVSMLVVRL NA  | NA |
| 65  | 88 KWVSMLTGKI NA  | NA |
| 54  | 66 GLPDFLIQVW NA  | NA |
| 67  | 57 GLPDFLIRGK NA  | NA |
| 27  | 29 WKVSSLTGNG NA  | NA |
| 32  | 36 WKVSSLVRA NA   | NA |
| 10  | 15 WKVSSLTNTF NA  | NA |
| 82  | 113 MSLGNLARMR NA | NA |
| 57  | 90 MSLGNLVMGQ NA  | NA |
| 65  | 90 MSLGNLAYWQ NA  | NA |
| 84  | 97 MSLGNLMGVK NA  | NA |
| 105 | 93 MSLGNLMYEA NA  | NA |
| 12  | 26 VKVFSMVSGH NA  | NA |
| 13  | 19 VKVFSMVAGI NA  | NA |
| 2   | 4 VKVFSMVNLH NA   | NA |
| 11  | 22 RAPSMLQATR NA  | NA |
| 19  | 18 RAPSMLAQGR NA  | NA |
| 15  | 10 RAPSMLQSEY NA  | NA |
| 44  | 58 RAPSMLAVRV NA  | NA |

|     |                   |    |
|-----|-------------------|----|
| 38  | 32 RAPSMLIYVW NA  | NA |
| 59  | 62 HGLWSSLVLNW NA | NA |
| 47  | 45 EQLSFLTSIY NA  | NA |
| 2   | 4 EQLSFLQQIA NA   | NA |
| 54  | 39 EQLSFLQGHW NA  | NA |
| 24  | 36 GLLLNMLGQG NA  | NA |
| 43  | 46 GLLLNMVNER NA  | NA |
| 35  | 31 GLLLNMINMF NA  | NA |
| 33  | 42 GLLLN MIDKR NA | NA |
| 33  | 36 RFALNLVNSI NA  | NA |
| 38  | 44 GGPSMLTSLH NA  | NA |
| 42  | 43 GGPSMLVAWS NA  | NA |
| 52  | 52 GGPSMLANTV NA  | NA |
| 24  | 44 GGPSMLAYIY NA  | NA |
| 65  | 54 GGPSMLSRSG NA  | NA |
| 34  | 40 GGPSMLVKGG NA  | NA |
| 42  | 50 GNVANLVMLL NA  | NA |
| 25  | 44 GNVANLVYQI NA  | NA |
| 32  | 52 RRVLMMIQMF NA  | NA |
| 76  | 83 RRVLMMIYGK NA  | NA |
| 36  | 62 RRVLMMIGEY NA  | NA |
| 21  | 33 CSPSMLTARA NA  | NA |
| 45  | 51 GYPSMLTASF NA  | NA |
| 63  | 73 KQPSMLTANA NA  | NA |
| 29  | 38 RHPSMLTAAK NA  | NA |
| 56  | 46 CMPSMLTAHT NA  | NA |
| 24  | 41 GRPSMLTAQK NA  | NA |
| 36  | 43 FMPSMLTAPV NA  | NA |
| 33  | 41 YTPSMLTART NA  | NA |
| 33  | 29 LIPSMLTAIR NA  | NA |
| 43  | 42 IPAFNLVVHY NA  | NA |
| 46  | 47 TNPIMLTLPA NA  | NA |
| 11  | 9 TVLNSLAMAA NA   | NA |
| 18  | 23 TVLNSLANPT NA  | NA |
| 10  | 10 RLLLNMLMLA NA  | NA |
| 101 | 151 RLLLNMSYLS NA | NA |
| 87  | 100 AHVFALQQKW NA | NA |
| 27  | 41 PVFQSLVKNY NA  | NA |
| 26  | 36 PVFQSLVLMML NA | NA |
| 57  | 79 ERIYALQLKQ NA  | NA |
| 47  | 58 GRLASLQMTL NA  | NA |

|     |                   |    |
|-----|-------------------|----|
| 52  | 63 RYAQPLIGGT NA  | NA |
| 20  | 33 GSVMNLSYNY NA  | NA |
| 68  | 101 GSVMNLTLSR NA | NA |
| 0   | 1 GSVMNLQQEV NA   | NA |
| 44  | 39 GSVMNLASKK NA  | NA |
| 42  | 62 RMLAQLAGAK NA  | NA |
| 38  | 65 RMLAQLVLSG NA  | NA |
| 95  | 87 RMLAQLVSLY NA  | NA |
| 80  | 131 RMLAQLTNAL NA | NA |
| 87  | 144 GCPHMMTYLG NA | NA |
| 89  | 91 GCPHMMLQVG NA  | NA |
| 58  | 72 GCPHMMQVIG NA  | NA |
| 134 | 136 GCPHMMLRMI NA | NA |
| 66  | 60 GCPHMMTMEA NA  | NA |
| 40  | 43 IPLLNLSLIQ NA  | NA |
| 104 | 138 IPLLNLTYHT NA | NA |
| 34  | 32 IPLLNLTYTG NA  | NA |
| 71  | 60 IPLLNLSARH NA  | NA |
| 133 | 151 AVLSNLTYHA NA | NA |
| 41  | 45 AVLSNLVKTQ NA  | NA |
| 44  | 51 AVLSNLHNNG NA  | NA |
| 271 | 367 AVLSNLQMRW NA | NA |
| 31  | 40 AVLSNLVQEG NA  | NA |
| 34  | 44 KGPEMLVYAV NA  | NA |
| 59  | 64 ELMLSMVLMT NA  | NA |
| 55  | 59 ELMLSMVGSR NA  | NA |
| 44  | 51 ELMLSMTDKG NA  | NA |
| 34  | 40 ELMLSMVSSG NA  | NA |
| 380 | 452 ELMLSMARKW NA | NA |
| 54  | 59 RILGYLTQGW NA  | NA |
| 11  | 8 RILGYLQVNT NA   | NA |
| 37  | 46 RILGYLTGNT NA  | NA |
| 38  | 40 PRVMLLLRQI NA  | NA |
| 32  | 41 PRVMLLIYWV NA  | NA |
| 32  | 44 PRVMLLIMWG NA  | NA |
| 26  | 35 PRVMLLYDSS NA  | NA |
| 42  | 43 PRVMLLVGIL NA  | NA |
| 36  | 28 PRVMLLYVVY NA  | NA |
| 27  | 28 PRVMLLIYMK NA  | NA |
| 40  | 51 PQFHSLVNLL NA  | NA |
| 54  | 70 YMFHSLVLRRL NA | NA |

|    |     |            |    |    |
|----|-----|------------|----|----|
| 71 | 81  | RTMQSLVLR  | NA | NA |
| 86 | 141 | MQVGSVLRL  | NA | NA |
| 48 | 59  | KSIVSLVLR  | NA | NA |
| 68 | 66  | SQPHLLVDVQ | NA | NA |
| 49 | 81  | SQPHLLLRHK | NA | NA |
| 45 | 65  | SQPHLLVKSK | NA | NA |
| 39 | 57  | SQPHLLMDSF | NA | NA |
| 69 | 82  | SQPHLLVDLF | NA | NA |
| 36 | 37  | QPPMRLVTIR | NA | NA |
| 97 | 100 | GMPMRLVTHL | NA | NA |
| 98 | 92  | LDPMRLVTRA | NA | NA |
| 71 | 80  | LSPMRLVTRY | NA | NA |
| 38 | 44  | QPPMRLVTKL | NA | NA |
| 74 | 91  | YPPMRLVTNA | NA | NA |
| 67 | 82  | FDPMRLVTQG | NA | NA |
| 19 | 20  | TDPMRLVTPI | NA | NA |
| 85 | 93  | CMPMRLVTGA | NA | NA |
| 85 | 146 | EYPMRLVTHR | NA | NA |
| 69 | 82  | ENPMRLVTQR | NA | NA |
| 65 | 57  | LGVSFLLRGK | NA | NA |
| 28 | 35  | GGVSFLLGGQ | NA | NA |
| 12 | 25  | HGVSFLLDQH | NA | NA |
| 37 | 31  | EGVSFLLQGR | NA | NA |
| 42 | 51  | WGVSFLLGGH | NA | NA |
| 17 | 34  | VGVSFLLAKL | NA | NA |
| 9  | 14  | HGVSFLLLLG | NA | NA |
| 16 | 17  | LGVSFLLNIR | NA | NA |
| 7  | 5   | YGVSFLLNSY | NA | NA |
| 32 | 40  | LGVSFLLSLK | NA | NA |
| 47 | 59  | LQSMNLTDDW | NA | NA |
| 13 | 23  | VRAHSLIGWT | NA | NA |
| 12 | 12  | VRAHSLTNII | NA | NA |
| 25 | 44  | EQPFRLNWIS | NA | NA |
| 88 | 80  | CNPFRLNWGG | NA | NA |
| 29 | 39  | GKPFRLNWLR | NA | NA |
| 69 | 93  | QFPFRLNWGY | NA | NA |
| 78 | 92  | GRPFRLNWIG | NA | NA |
| 63 | 64  | NKPFRLNWGG | NA | NA |
| 36 | 49  | LPPFRLNWTI | NA | NA |
| 74 | 74  | DTPFRLNWIY | NA | NA |
| 72 | 73  | GDPFRLNWVS | NA | NA |

|     |     |                 |    |
|-----|-----|-----------------|----|
| 51  | 69  | ERVELLYLVL NA   | NA |
| 71  | 92  | ERVELLYNMW NA   | NA |
| 39  | 38  | FRVELLYRGR NA   | NA |
| 68  | 71  | GRVELLYSLG NA   | NA |
| 40  | 59  | DRVELLYALV NA   | NA |
| 55  | 63  | KRVELLYGKS NA   | NA |
| 23  | 25  | LRVELLYSAG NA   | NA |
| 33  | 35  | KRVELLYYNL NA   | NA |
| 41  | 48  | GRVELLYMNF NA   | NA |
| 39  | 38  | ARVELLYNPY NA   | NA |
| 25  | 42  | GKVSELIKGH NA   | NA |
| 33  | 25  | RKVSELIGIS NA   | NA |
| 80  | 91  | IKVSELIMSF NA   | NA |
| 15  | 23  | NKVSELIGVG NA   | NA |
| 58  | 50  | FKVSELIGQI NA   | NA |
| 18  | 21  | RKVSELIDLL NA   | NA |
| 18  | 26  | PKVSELINLA NA   | NA |
| 94  | 122 | DKVSELIMLH NA   | NA |
| 23  | 37  | KVLQKLVNVG NA   | NA |
| 109 | 114 | CVLQKLVGES NA   | NA |
| 47  | 63  | LVLQKLVLTR NA   | NA |
| 26  | 32  | GVLQKLVLVI NA   | NA |
| 24  | 32  | GVLQKLVGKH NA   | NA |
| 68  | 89  | EVLQKLVGNW NA   | NA |
| 47  | 58  | YVLQKLVMOG NA   | NA |
| 67  | 79  | TVLQKLVYEK NA   | NA |
| 81  | 74  | IVLQKLVMMR NA   | NA |
| 59  | 78  | QKVLNMVKNV NA   | NA |
| 35  | 61  | VRPHWLNAPY NA   | NA |
| 225 | 253 | CNPHWLNASH NA   | NA |
| 66  | 73  | RNPHWLNAMG NA   | NA |
| 92  | 130 | TKPHWLN AIF NA  | NA |
| 83  | 121 | PHPHWLN AWG NA  | NA |
| 91  | 119 | CMPHWLN AVQ NA  | NA |
| 55  | 74  | QPPHWLN ARH NA  | NA |
| 80  | 71  | NRPHWLN AGV NA  | NA |
| 87  | 121 | TQPHWLN AHG NA  | NA |
| 52  | 69  | FRPHWLN ANT NA  | NA |
| 31  | 38  | HFISALQ RLP NA  | NA |
| 95  | 108 | FDLAKLTV RL NA  | NA |
| 50  | 61  | FRLAKLTV I I NA | NA |

|     |     |               |    |
|-----|-----|---------------|----|
| 20  | 33  | AMLAKLTVTG NA | NA |
| 64  | 81  | CHLAKLTVRS NA | NA |
| 42  | 38  | QMLAKLTVNG NA | NA |
| 43  | 48  | IWLAKLTVMR NA | NA |
| 73  | 87  | LSLAKLTVQL NA | NA |
| 53  | 57  | GRLAKLTVTL NA | NA |
| 41  | 52  | GTLAKLTVMQ NA | NA |
| 24  | 18  | WALAKLTVHF NA | NA |
| 65  | 88  | TQMGALTMPL NA | NA |
| 58  | 49  | GGLGMMLGLY NA | NA |
| 35  | 32  | KGLGMMLKWW NA | NA |
| 22  | 19  | YGLGMMLGGI NA | NA |
| 33  | 28  | DGLGMMLGTF NA | NA |
| 49  | 56  | IGLGMMLYAQ NA | NA |
| 40  | 49  | KGLGMMLKHY NA | NA |
| 31  | 49  | LGLGMMLGGL NA | NA |
| 33  | 44  | HGLGMMLLKF NA | NA |
| 65  | 64  | MGLGMMLYKA NA | NA |
| 13  | 17  | GGLGMMLYLQ NA | NA |
| 10  | 11  | CALDWMSKIF NA | NA |
| 47  | 53  | QALDWMSGAW NA | NA |
| 47  | 64  | KALDWMSMPL NA | NA |
| 21  | 34  | EALDWMSLAH NA | NA |
| 39  | 38  | VALDWMSLGH NA | NA |
| 119 | 122 | NALDWMSVRL NA | NA |
| 111 | 128 | NALDWMSQRY NA | NA |
| 44  | 52  | VALDWMSGGL NA | NA |
| 28  | 43  | GALDWMSKWG NA | NA |
| 63  | 64  | NALDWMSLHG NA | NA |
| 30  | 23  | QALDWMSMVS NA | NA |
| 51  | 67  | HKVHQMLGNA NA | NA |
| 218 | 289 | MKVHQMLGRH NA | NA |
| 94  | 114 | KKVHQMLKHK NA | NA |
| 55  | 65  | PKVHQMLSEH NA | NA |
| 2   | 7   | YKVHQMLMRK NA | NA |
| 42  | 57  | RKVHQMLGHH NA | NA |
| 61  | 98  | PKVHQMLDLW NA | NA |
| 126 | 146 | CKVHQMLSRG NA | NA |
| 46  | 57  | FMMGNMLSAR NA | NA |
| 46  | 54  | FMMGNMASEY NA | NA |
| 87  | 105 | FMMGNMALSQ NA | NA |

|     |     |               |    |
|-----|-----|---------------|----|
| 49  | 68  | FMMGNMQNHK NA | NA |
| 74  | 109 | FMMGNMYALW NA | NA |
| 38  | 39  | GKLGMLATSA NA | NA |
| 77  | 89  | FHLGMLATGL NA | NA |
| 46  | 69  | FQLGMLATQH NA | NA |
| 68  | 77  | THLGMLATGL NA | NA |
| 37  | 54  | QALGMLATHS NA | NA |
| 23  | 38  | DHLGMLATSF NA | NA |
| 42  | 44  | GKLGMLATSH NA | NA |
| 35  | 53  | HALGMLATHA NA | NA |
| 27  | 48  | ETLGMLATSH NA | NA |
| 29  | 25  | THLGMLATGG NA | NA |
| 20  | 28  | PMLGMLATVG NA | NA |
| 12  | 12  | ISPMLLTYS NA  | NA |
| 40  | 39  | ARIALLTVWA NA | NA |
| 39  | 52  | NRIALLTGLF NA | NA |
| 40  | 55  | DRIALLTAVY NA | NA |
| 30  | 52  | GRIALLTDNQ NA | NA |
| 48  | 57  | QRIALLTQHH NA | NA |
| 32  | 40  | WRIALLTDGK NA | NA |
| 35  | 30  | ARIALLTyak NA | NA |
| 53  | 45  | GRIALLTSRT NA | NA |
| 40  | 39  | WRIALLTQGY NA | NA |
| 76  | 81  | DRIALLTSSL NA | NA |
| 31  | 23  | LRIALLTLMH NA | NA |
| 88  | 117 | RYYGELRLSN NA | NA |
| 100 | 146 | MMLELRRLSN NA | NA |
| 31  | 32  | GFIESMYVGG NA | NA |
| 43  | 52  | AYIESMYVGT NA | NA |
| 53  | 58  | DQIESMYVPL NA | NA |
| 221 | 231 | MKIESMYVHG NA | NA |
| 24  | 42  | FWIESMYVLW NA | NA |
| 28  | 35  | LHIESMYVIF NA | NA |
| 31  | 33  | GIIESMYVIG NA | NA |
| 46  | 35  | TPIESMYVPW NA | NA |
| 63  | 72  | WWIESMYVKG NA | NA |
| 31  | 27  | SSAHLGQ NA    | NA |
| 56  | 59  | ESAHLGAGT NA  | NA |
| 66  | 65  | ISAHLGAL NA   | NA |
| 92  | 126 | KSAHLGSKQ NA  | NA |
| 35  | 41  | FAHLGLLNY NA  | NA |

|     |     |                |    |
|-----|-----|----------------|----|
| 26  | 47  | GSAHLLLVAVF NA | NA |
| 53  | 69  | VSAHLLLVGIA NA | NA |
| 49  | 27  | RTPLRLLQFL NA  | NA |
| 15  | 13  | WNILRLLQFL NA  | NA |
| 92  | 99  | MSYHRLQFL NA   | NA |
| 73  | 64  | YRPVRLQFL NA   | NA |
| 43  | 73  | IYPQRLLQFL NA  | NA |
| 40  | 45  | AGLDLLWDES NA  | NA |
| 41  | 56  | AGLDLLVSTH NA  | NA |
| 51  | 55  | AGLDLLWDMS NA  | NA |
| 15  | 21  | AGLDLLYGVS NA  | NA |
| 59  | 79  | ERLGCLKLPW NA  | NA |
| 23  | 39  | RRLGCLKKES NA  | NA |
| 81  | 94  | SRLGCLKKGV NA  | NA |
| 48  | 56  | KRLGCLKGEK NA  | NA |
| 68  | 90  | CRLGCLKNGR NA  | NA |
| 86  | 118 | IRLGCLKSRA NA  | NA |
| 65  | 78  | CRLGCLKNSR NA  | NA |
| 81  | 87  | CRLGCLKLVS NA  | NA |
| 99  | 132 | LRLGCLKVRW NA  | NA |
| 14  | 17  | RMVIFLMSWM NA  | NA |
| 19  | 23  | WSVQLLQTT NA   | NA |
| 90  | 106 | WSVQLLKRAY NA  | NA |
| 24  | 28  | WSVQLLAYSS NA  | NA |
| 22  | 48  | WSVQLLVSHG NA  | NA |
| 61  | 49  | MYYGELLSRI NA  | NA |
| 55  | 59  | VYYGELLVGR NA  | NA |
| 29  | 33  | WYYGELLVWK NA  | NA |
| 47  | 58  | PYYGELLQGV NA  | NA |
| 24  | 21  | SYYGELLMPS NA  | NA |
| 41  | 39  | GYYGELLVWR NA  | NA |
| 14  | 21  | EYYGELLAVA NA  | NA |
| 35  | 55  | KYYGELLGGK NA  | NA |
| 21  | 33  | IYYGELLVIY NA  | NA |
| 25  | 35  | YYYGELLKGS NA  | NA |
| 87  | 121 | EKVMLMIQPH NA  | NA |
| 68  | 71  | EKVMLMKYTG NA  | NA |
| 107 | 145 | EKVMLMKAKR NA  | NA |
| 89  | 96  | EKVMLMKGNS NA  | NA |
| 71  | 72  | EKVMLMANNT NA  | NA |
| 118 | 138 | EKVMLMIMKV NA  | NA |



|     |     |               |    |
|-----|-----|---------------|----|
| 30  | 43  | EKVMLMSSEG NA | NA |
| 72  | 85  | EKVMLMSSKI NA | NA |
| 41  | 39  | IHLASQRGPF NA | NA |
| 77  | 86  | KHLASQRNGL NA | NA |
| 59  | 48  | RHLASQRNTT NA | NA |
| 35  | 61  | FHLASQRMIG NA | NA |
| 26  | 38  | SHLASQRDRA NA | NA |
| 64  | 67  | CHLASQRSKI NA | NA |
| 76  | 108 | YHLASQRYAG NA | NA |
| 85  | 91  | IHLASQRNWT NA | NA |
| 79  | 98  | THLASQRAGR NA | NA |
| 56  | 49  | FHLASQRGIH NA | NA |
| 67  | 94  | PHLASQRQLR NA | NA |
| 15  | 27  | LAIMALQVPT NA | NA |
| 33  | 35  | DNVFALQVPT NA | NA |
| 70  | 84  | MVPHMLYRVF NA | NA |
| 78  | 94  | MVPHMLQMVI NA | NA |
| 87  | 88  | MVPHMLYYGY NA | NA |
| 46  | 70  | WWVERLVLRV NA | NA |
| 146 | 163 | QYFHRLVLRV NA | NA |
| 49  | 56  | YIIQRLVLRV NA | NA |
| 18  | 25  | CAFIRLVLRV NA | NA |
| 55  | 70  | PKAQALTLEV NA | NA |
| 72  | 76  | NRAQALTLVW NA | NA |
| 132 | 131 | YRAQALTLNS NA | NA |
| 51  | 62  | GNAQALTLIL NA | NA |
| 86  | 91  | EWAQALTLAR NA | NA |
| 123 | 149 | WSAQALTLPF NA | NA |
| 30  | 26  | PRAQALTLSF NA | NA |
| 79  | 98  | GWAQALTLWR NA | NA |
| 68  | 95  | RYAQALTLHS NA | NA |
| 70  | 77  | DMAQALTLHT NA | NA |
| 49  | 75  | HKAQALTLGG NA | NA |
| 62  | 63  | RWMLELRVNG NA | NA |
| 39  | 63  | PHMLELRVNT NA | NA |
| 48  | 72  | GTIFRLRNGS NA | NA |
| 77  | 81  | GTIFRLKYLK NA | NA |
| 30  | 41  | GTIFRLAGPL NA | NA |
| 60  | 52  | GTIFRLINGK NA | NA |
| 31  | 30  | GTIFRLVVWK NA | NA |
| 22  | 29  | GTIFRLISPA NA | NA |

|     |     |                |    |
|-----|-----|----------------|----|
| 64  | 62  | GTIFRLVGGR NA  | NA |
| 31  | 31  | GTIFRLMSVY NA  | NA |
| 30  | 34  | GTIFRLSMIR NA  | NA |
| 56  | 84  | FTMMSLMSLF NA  | NA |
| 47  | 50  | VTMMSLMGMG NA  | NA |
| 35  | 37  | PTMMSLMQRG NA  | NA |
| 68  | 67  | TTMMSLMLVH NA  | NA |
| 130 | 149 | KTMMSLMYMV NA  | NA |
| 39  | 57  | PTMMSLMGGW NA  | NA |
| 71  | 70  | YTMMSLMAQI NA  | NA |
| 66  | 67  | WTMMSLMLAG NA  | NA |
| 54  | 83  | LTMMSLMSSK NA  | NA |
| 51  | 76  | WTMMSLMGIL NA  | NA |
| 24  | 19  | QRMDLLIVGG NA  | NA |
| 80  | 116 | TIPMRLVLRN NA  | NA |
| 93  | 98  | IDVMRLVLRW NA  | NA |
| 57  | 89  | NNVMRLVLRN NA  | NA |
| 30  | 48  | KRFMRLVLRN NA  | NA |
| 90  | 78  | HTAMRLVLRK NA  | NA |
| 61  | 77  | PQFMRLVLRK NA  | NA |
| 34  | 43  | IWMRLVLRG NA   | NA |
| 51  | 67  | TALGYLTRRG NA  | NA |
| 42  | 49  | TALGYLTDHA NA  | NA |
| 4   | 13  | PVWWQLLQK NA   | NA |
| 76  | 92  | VNAMRMVGP NA   | NA |
| 35  | 29  | TNAMRMVRAG NA  | NA |
| 94  | 141 | KNAMRMVRGW NA  | NA |
| 58  | 63  | TNAMRMVGLS NA  | NA |
| 71  | 88  | NNAMRMVYES NA  | NA |
| 45  | 53  | RNAMRMVGWV NA  | NA |
| 56  | 66  | TNAMRMVKPV NA  | NA |
| 45  | 53  | CNAMRMVYVK NA  | NA |
| 59  | 72  | YNAMRMVCLI NA  | NA |
| 83  | 82  | PNAMRMVYAG NA  | NA |
| 23  | 44  | NNAMRMVLGF NA  | NA |
| 29  | 40  | SPMVNLIYWN NA  | NA |
| 44  | 52  | RFAHNLIYWN NA  | NA |
| 68  | 67  | EYIINLIYWN NA  | NA |
| 19  | 32  | HMAMNLTLLIT NA | NA |
| 50  | 64  | HDAMNLTLLPI NA | NA |
| 41  | 55  | YFAMNLTLLHV NA | NA |

|     |     |                |    |
|-----|-----|----------------|----|
| 35  | 46  | KKAMNLTLLIG NA | NA |
| 9   | 13  | RFAMNLTLLQS NA | NA |
| 28  | 33  | GSAMNLTLEQ NA  | NA |
| 38  | 70  | ADAMNLTLLWA NA | NA |
| 34  | 38  | HSAMNLTLLSK NA | NA |
| 61  | 61  | KIAMNLTLLSR NA | NA |
| 36  | 41  | HYAMNLTLLAG NA | NA |
| 52  | 50  | QQAMNLTLLIG NA | NA |
| 22  | 39  | FYVIMLLMKQ NA  | NA |
| 107 | 85  | IHSMMLLMKQ NA  | NA |
| 22  | 35  | VTVIALVVKY NA  | NA |
| 24  | 39  | VTVIALMVRK NA  | NA |
| 11  | 19  | VTVIALMLST NA  | NA |
| 59  | 72  | VTVIALLRGQ NA  | NA |
| 39  | 43  | VTVIALLGW NA   | NA |
| 48  | 46  | NSLWTLMASG NA  | NA |
| 63  | 69  | IQLWTLMAIA NA  | NA |
| 30  | 43  | LMLWTLMAAL NA  | NA |
| 22  | 47  | ARLWTLMAKG NA  | NA |
| 47  | 65  | SQLWTLMAPV NA  | NA |
| 10  | 15  | LALWTLMANV NA  | NA |
| 27  | 42  | QILWTLMATT NA  | NA |
| 62  | 64  | MQLWTLMAMH NA  | NA |
| 80  | 104 | HPLWTLMARI NA  | NA |
| 30  | 51  | PALWTLMAHW NA  | NA |
| 18  | 14  | NTIAYLNQSR NA  | NA |
| 55  | 71  | KTIAYLNAHI NA  | NA |
| 90  | 98  | DTIAYLNRML NA  | NA |
| 67  | 64  | TTIAYLNYRA NA  | NA |
| 36  | 52  | VTIAYLNGMR NA  | NA |
| 26  | 44  | DTIAYLNGPV NA  | NA |
| 22  | 32  | ITIAYLNVIG NA  | NA |
| 25  | 25  | DTIAYLNVGG NA  | NA |
| 35  | 33  | GTIAYLNYMI NA  | NA |
| 36  | 44  | PTIAYLNGMY NA  | NA |
| 26  | 34  | ATIAYLNYII NA  | NA |
| 25  | 45  | IQHMRLLILWQ NA | NA |
| 45  | 50  | MQHMRLIKHL NA  | NA |
| 86  | 83  | WQHMRLLIRSW NA | NA |
| 32  | 38  | HQHMRLLIDNV NA | NA |
| 108 | 106 | MQHMRLIGRG NA  | NA |

|     |                    |    |
|-----|--------------------|----|
| 31  | 41 IQHMRLIQEL NA   | NA |
| 62  | 72 IQHMRLIGSF NA   | NA |
| 36  | 63 TQHMRLIKSH NA   | NA |
| 9   | 16 WQHMRLINEF NA   | NA |
| 52  | 65 LQHMRLISIL NA   | NA |
| 83  | 117 RVLSRLWQMR NA  | NA |
| 95  | 102 RVLSRLSQHW NA  | NA |
| 18  | 26 RVLSRLTLTS NA   | NA |
| 40  | 42 RVLSRLLVIW NA   | NA |
| 60  | 82 RVLSRLWYEW NA   | NA |
| 37  | 58 RVLSRLAGSG NA   | NA |
| 101 | 109 RVLSRLLSKL NA  | NA |
| 45  | 46 NRIGFLVRSL NA   | NA |
| 21  | 26 VSISFLTNMT NA   | NA |
| 36  | 35 QNAGALIAND NA   | NA |
| 49  | 55 PFAISMVVKG NA   | NA |
| 39  | 29 YFAISMVMPF NA   | NA |
| 43  | 62 HFAISMVNQY NA   | NA |
| 42  | 49 FFAISMVMAR NA   | NA |
| 43  | 48 CFAISMVNVV NA   | NA |
| 46  | 60 TFAISMVVG T NA  | NA |
| 43  | 43 MFAISMVYAG NA   | NA |
| 55  | 68 MFAISMVVEA NA   | NA |
| 57  | 76 NFAISMVMQW NA   | NA |
| 47  | 66 YPFHQ LLLRN NA  | NA |
| 24  | 41 VHHIQ LLLRN NA  | NA |
| 35  | 41 EAMQQLLLRN NA   | NA |
| 21  | 36 PNVSQ LLLRN NA  | NA |
| 18  | 16 KSFHQ LLLRN NA  | NA |
| 113 | 112 MHMFQLRVFK NA  | NA |
| 25  | 17 WWMFQLRVFT NA   | NA |
| 45  | 59 RDLWKLSL PK NA  | NA |
| 31  | 28 RDLWK LKDPT NA  | NA |
| 134 | 197 RDLWK LMYHS NA | NA |
| 63  | 70 RDLWK LIARR NA  | NA |
| 37  | 53 RDLWK LVSGA NA  | NA |
| 46  | 42 RDLWK LANIR NA  | NA |
| 43  | 41 RDLWK LADQT NA  | NA |
| 49  | 59 RDLWK LTNRQ NA  | NA |
| 36  | 44 RDLWK L TLPQ NA | NA |
| 40  | 47 RRASALNAVL NA   | NA |

|     |                   |    |
|-----|-------------------|----|
| 21  | 27 MRASALNKGG NA  | NA |
| 237 | 278 SRASALNQRW NA | NA |
| 4   | 4 PRASALNASA NA   | NA |
| 40  | 38 ERASALNGRQ NA  | NA |
| 20  | 34 IRASALNMMS NA  | NA |
| 0   | 7 LRASALNMSW NA   | NA |
| 55  | 63 YRASALNRSI NA  | NA |
| 33  | 36 TPVGWMANEG NA  | NA |
| 39  | 28 TPVGWMVNMS NA  | NA |
| 23  | 26 HVLQNLQGTI NA  | NA |
| 74  | 61 HVLQNLKSER NA  | NA |
| 47  | 74 HVLQNLLYTL NA  | NA |
| 51  | 56 HVLQNLKNAI NA  | NA |
| 42  | 48 HVLQNLTKKI NA  | NA |
| 40  | 37 HVLQNLHGVH NA  | NA |
| 57  | 56 HVLQNLKNAQ NA  | NA |
| 47  | 47 EPIYNLSDGY NA  | NA |
| 47  | 61 EPIYNLSGIK NA  | NA |
| 24  | 37 FVLMRLNQQS NA  | NA |
| 12  | 22 SVLMRLNMIV NA  | NA |
| 43  | 49 GVLMRLNGRI NA  | NA |
| 51  | 60 WVLMRLNNHG NA  | NA |
| 45  | 51 WVLMRLNNNQ NA  | NA |
| 19  | 38 TVLMRLNMTR NA  | NA |
| 42  | 48 FVLMRLNGQH NA  | NA |
| 24  | 28 YVLMRLNVNV NA  | NA |
| 25  | 35 NVLMRLNLEQ NA  | NA |
| 123 | 127 MVMMQLVDHW NA | NA |
| 47  | 59 QVMMQLVRAY NA  | NA |
| 80  | 83 HVMMQLVQMF NA  | NA |
| 75  | 76 RVMMQLVGQW NA  | NA |
| 49  | 38 PVMMQLVMAG NA  | NA |
| 55  | 89 VVMMQLVQIH NA  | NA |
| 43  | 43 PVMMQLVYLL NA  | NA |
| 35  | 33 AVMMQLVLRV NA  | NA |
| 30  | 48 HVMMQLVNET NA  | NA |
| 18  | 23 GVMMQLVNIG NA  | NA |
| 105 | 126 KVMMQLVKWS NA | NA |
| 49  | 66 NPVMRMSDLV NA  | NA |
| 11  | 13 WPVMRMSGG NA   | NA |
| 37  | 50 TPVMRMSVWF NA  | NA |

|     |                   |    |
|-----|-------------------|----|
| 45  | 46 YPVMRMSYPS NA  | NA |
| 56  | 84 HPVMRMSAWQ NA  | NA |
| 23  | 29 SPVMRMSQQR NA  | NA |
| 55  | 78 VPVMRMSQHV NA  | NA |
| 125 | 145 TPVMRMSYHS NA | NA |
| 51  | 50 VPVMRMSYQS NA  | NA |
| 19  | 17 FPVMRMSDTG NA  | NA |
| 17  | 19 DIMLSLVIII NA  | NA |
| 63  | 66 QWMLSLVIKK NA  | NA |
| 66  | 68 RKMLSLVIVT NA  | NA |
| 73  | 115 MNMLSLVING NA | NA |
| 56  | 57 ASMLSLVIIY NA  | NA |
| 58  | 87 FDMLSLVIPA NA  | NA |
| 15  | 20 KWMLSLVIII NA  | NA |
| 16  | 24 GIMLSLVIEI NA  | NA |
| 53  | 69 TTMLSLVIHL NA  | NA |
| 58  | 76 QPMLSLVIQT NA  | NA |
| 53  | 68 TAMLSLVIKW NA  | NA |
| 135 | 188 VRTMALIYHK NA | NA |
| 52  | 68 VRTMALSRSR NA  | NA |
| 54  | 64 VRTMALMYML NA  | NA |
| 82  | 114 MWMHELKAGV NA | NA |
| 86  | 82 EWMHELKSAG NA  | NA |
| 117 | 126 YWMHELKSLV NA | NA |
| 148 | 172 HWMHELKSHT NA | NA |
| 99  | 111 MWMHELKVIG NA | NA |
| 90  | 124 AWMHELKSTS NA | NA |
| 75  | 83 RWMHELKQNV NA  | NA |
| 149 | 178 KWMHELKVEL NA | NA |
| 58  | 85 PWMHELKANQ NA  | NA |
| 30  | 29 SWMHELKSHG NA  | NA |
| 109 | 132 SWMHELKARL NA | NA |
| 71  | 80 ERPMLLVVRL NA  | NA |
| 67  | 56 PQHVRLVVRL NA  | NA |
| 18  | 21 SQVFRLIDTQ NA  | NA |
| 21  | 25 SQVFRLINAK NA  | NA |
| 23  | 24 NQVFRLIGSG NA  | NA |
| 37  | 32 LQVFRLIVMH NA  | NA |
| 56  | 79 KQVFRLIMHT NA  | NA |
| 44  | 43 RQVFRLIGGT NA  | NA |
| 33  | 43 AQVFRLIQKS NA  | NA |

|     |     |               |    |
|-----|-----|---------------|----|
| 10  | 23  | FQVFRLIMLF NA | NA |
| 40  | 24  | NQVFRLILSF NA | NA |
| 42  | 40  | FQVFRLIRSL NA | NA |
| 49  | 27  | TQVFRLIGQS NA | NA |
| 39  | 59  | YSVVRLNMRL NA | NA |
| 183 | 243 | KHMERLNMRL NA | NA |
| 198 | 258 | TNYSRLNMRL NA | NA |
| 8   | 18  | CAYMRLNMRL NA | NA |
| 87  | 80  | SQYERLNMRL NA | NA |
| 52  | 58  | RGMQNLSMTW NA | NA |
| 25  | 26  | TRSAKLIVRK NA | NA |
| 38  | 70  | TTSAKLIVRS NA | NA |
| 58  | 70  | GASAKLIVRT NA | NA |
| 50  | 66  | RNLASLTVHV NA | NA |
| 47  | 32  | RKALNLVGTG NA | NA |
| 33  | 29  | PGIANLTKGK NA | NA |
| 9   | 6   | PGIANLQNGV NA | NA |
| 81  | 103 | RCLMALTMWV NA | NA |
| 97  | 110 | ACLMALTSNV NA | NA |
| 49  | 76  | ICLMALTDGA NA | NA |
| 66  | 107 | RCLMALTNIK NA | NA |
| 81  | 87  | NCLMALTRQG NA | NA |
| 67  | 82  | KCLMALTVGT NA | NA |
| 57  | 91  | MCLMALTVVY NA | NA |
| 98  | 118 | MCLMALTGGW NA | NA |
| 18  | 29  | TMAHPLIQSS NA | NA |
| 19  | 29  | PDVFALQVHI NA | NA |
| 40  | 42  | PDVFALQQNK NA | NA |
| 73  | 72  | PDVFALQVGS NA | NA |
| 50  | 45  | VVAVSLIAIS NA | NA |
| 58  | 64  | VVAVSLIRVT NA | NA |
| 33  | 66  | VPPMPLTASW NA | NA |
| 32  | 29  | VPPMPLTQWR NA | NA |
| 87  | 120 | VHVHALVKQY NA | NA |
| 94  | 121 | VHVHALTVTA NA | NA |
| 69  | 76  | VHVHALVKGY NA | NA |
| 57  | 77  | YQTMALVGWW NA | NA |
| 38  | 47  | VFALNLVVGH NA | NA |
| 50  | 71  | WLAQALIVLR NA | NA |
| 135 | 172 | WLAQALIRRL NA | NA |
| 67  | 79  | WLAQALTYSA NA | NA |

|     |                   |    |
|-----|-------------------|----|
| 8   | 11 LPALNMVSAA NA  | NA |
| 89  | 120 ANAMNLSYWY NA | NA |
| 17  | 19 ANAMNLILLF NA  | NA |
| 47  | 41 ANAMNLIMSG NA  | NA |
| 24  | 29 PYAENLVKIT NA  | NA |
| 50  | 71 PYAENLIDLW NA  | NA |
| 27  | 34 PYAENLVNQV NA  | NA |
| 50  | 47 PYAENLIKGF NA  | NA |
| 59  | 60 SRPLNLVMHI NA  | NA |
| 80  | 98 SRPLNLVYQG NA  | NA |
| 61  | 82 SRPLNLVANW NA  | NA |
| 87  | 118 MDLLSLTKWV NA | NA |
| 99  | 107 MDLLSLMGIW NA | NA |
| 92  | 120 MDLLSLMSGW NA | NA |
| 49  | 75 MDLLSLQNRI NA  | NA |
| 67  | 90 CLLASLQVHY NA  | NA |
| 170 | 204 CLLASLTRRA NA | NA |
| 57  | 66 CLLASLTGTK NA  | NA |
| 44  | 52 CLLASLQDLG NA  | NA |
| 21  | 44 AMAHSLIVVK NA  | NA |
| 61  | 62 AMAHSLVYMS NA  | NA |
| 4   | 2 KVLASLQQTY NA   | NA |
| 16  | 12 KVLASLVASA NA  | NA |
| 13  | 17 TFYMRLTLKW NA  | NA |
| 61  | 75 VEAHALMGQV NA  | NA |
| 61  | 81 VEAHALSKGK NA  | NA |
| 93  | 86 VEAHALMAWY NA  | NA |
| 18  | 16 VEAHALQREF NA  | NA |
| 13  | 17 VEAHALQRTV NA  | NA |
| 42  | 42 VEAHALIMGA NA  | NA |
| 77  | 125 YRMQALTSRF NA | NA |
| 67  | 113 LKIQALTSRF NA | NA |
| 68  | 66 LMVSALTSRF NA  | NA |
| 63  | 76 IRIGALTSRF NA  | NA |
| 52  | 63 CFVMALTHIW NA  | NA |
| 64  | 79 GTMMALTHIK NA  | NA |
| 70  | 103 FKAMALTHIT NA | NA |
| 38  | 42 RKVMALTHIR NA  | NA |
| 38  | 65 DYAMALTHIS NA  | NA |
| 91  | 114 ENAMALTHIH NA | NA |
| 54  | 67 TDMMNLTFLA NA  | NA |



|     |     |               |    |
|-----|-----|---------------|----|
| 45  | 72  | KFSHNLTFLA NA | NA |
| 52  | 101 | SPMYNLTFLA NA | NA |
| 38  | 55  | TRMALLQYTW NA | NA |
| 20  | 24  | TRMALLQQQG NA | NA |
| 81  | 91  | TRMALLLQNW NA | NA |
| 115 | 130 | CKVMKLQKTR NA | NA |
| 8   | 31  | LRVMKLQKWG NA | NA |
| 87  | 93  | YQVMKLQKTR NA | NA |
| 117 | 132 | QYVMKLQKMS NA | NA |
| 80  | 108 | CYVMKLQKAI NA | NA |
| 57  | 65  | FRVMKLQKIS NA | NA |
| 36  | 45  | YAVMKLQKTL NA | NA |
| 74  | 85  | GRVMKLQKPS NA | NA |
| 34  | 56  | KWPERLYMGW NA | NA |
| 30  | 49  | KWPERLYGQS NA | NA |
| 131 | 104 | KWPERLRQNW NA | NA |
| 115 | 145 | KWPERLRQVR NA | NA |
| 40  | 38  | KWPERLQRET NA | NA |
| 47  | 59  | KWPERLVQHS NA | NA |
| 12  | 12  | EAVGNLQGMT NA | NA |
| 32  | 41  | EAVGNLAGRS NA | NA |
| 20  | 35  | EAVGNLLQMI NA | NA |
| 22  | 27  | DPVGALNKVF NA | NA |
| 65  | 84  | YKVGALNKIL NA | NA |
| 38  | 43  | FRVGALNKEL NA | NA |
| 69  | 110 | YHVGALNKVY NA | NA |
| 78  | 99  | CWVGALNKHG NA | NA |
| 28  | 29  | HIVGALNKQI NA | NA |
| 11  | 16  | TNVGALNKEG NA | NA |
| 25  | 32  | SAVGALNKIF NA | NA |
| 26  | 36  | FMVGALNKVF NA | NA |
| 45  | 60  | AHVGALNKAL NA | NA |
| 31  | 29  | NAVGALNKGK NA | NA |
| 59  | 57  | WYMGQLLATA NA | NA |
| 8   | 14  | PRFMQLLATA NA | NA |
| 34  | 51  | DFFHQLLATA NA | NA |
| 62  | 51  | PTPGQLLATA NA | NA |
| 32  | 73  | ARYEQLLATA NA | NA |
| 56  | 70  | YPAMQLLATA NA | NA |
| 60  | 67  | CSMEQLLATA NA | NA |
| 29  | 35  | VWIQNLVVRV NA | NA |

|     |     |             |    |    |
|-----|-----|-------------|----|----|
| 87  | 84  | MWMMNLVRVR  | NA | NA |
| 61  | 86  | YMSHNLVRVR  | NA | NA |
| 47  | 64  | HI IERLVMTY | NA | NA |
| 50  | 76  | WDPIRLVMTY  | NA | NA |
| 43  | 74  | KIPMRLVMTY  | NA | NA |
| 52  | 77  | GYPIRLMYER  | NA | NA |
| 69  | 108 | ASPMRLMYER  | NA | NA |
| 74  | 75  | YNVIRLMYER  | NA | NA |
| 83  | 91  | ATVHRLMYER  | NA | NA |
| 78  | 82  | QKIFRLMYER  | NA | NA |
| 113 | 162 | VAISRLVYAH  | NA | NA |
| 51  | 59  | VAISRLLNML  | NA | NA |
| 29  | 56  | VAISRLQVVT  | NA | NA |
| 28  | 33  | VAISRLIKAI  | NA | NA |
| 34  | 49  | VAISRLADIV  | NA | NA |
| 31  | 54  | AIVGMLYNIG  | NA | NA |
| 37  | 45  | IIVGMLYNQI  | NA | NA |
| 45  | 44  | GIVGMLYNAS  | NA | NA |
| 57  | 68  | VSVGMLYNPR  | NA | NA |
| 22  | 30  | GSVGMLYNMS  | NA | NA |
| 92  | 98  | VHVGMLYNWG  | NA | NA |
| 55  | 65  | WIVGMLYNEY  | NA | NA |
| 38  | 60  | WYVGMLYNLV  | NA | NA |
| 49  | 67  | WQVGMLYNMS  | NA | NA |
| 115 | 100 | CYVGMLYNRK  | NA | NA |
| 46  | 44  | IRVGMLYNNG  | NA | NA |
| 23  | 31  | LRPEFLVAKA  | NA | NA |
| 37  | 48  | GHIVFLVAKA  | NA | NA |
| 15  | 13  | YSSFALVAKI  | NA | NA |
| 45  | 31  | DNFFALVAKG  | NA | NA |
| 55  | 65  | IQMFALVAKK  | NA | NA |
| 79  | 112 | MSMFALVAKT  | NA | NA |
| 78  | 86  | NNFFALVAKI  | NA | NA |
| 130 | 127 | DLPHCLYDHT  | NA | NA |
| 13  | 26  | DLPHCLQRGL  | NA | NA |
| 57  | 71  | DLPHCLLQGI  | NA | NA |
| 35  | 43  | DLPHCLQRAY  | NA | NA |
| 63  | 82  | DLPHCLMDEA  | NA | NA |
| 94  | 83  | FTVHMLAKGH  | NA | NA |
| 63  | 72  | FTVHMLTKGW  | NA | NA |
| 48  | 53  | FTVHMLISTV  | NA | NA |

|     |     |               |    |
|-----|-----|---------------|----|
| 30  | 24  | FTVHMLMGKG NA | NA |
| 32  | 48  | FTVHMLQVKG NA | NA |
| 72  | 83  | FTVHMLYRRT NA | NA |
| 18  | 25  | FTVHMLIDGY NA | NA |
| 51  | 79  | FTVHMLYGGV NA | NA |
| 35  | 42  | FTVHMLQNGT NA | NA |
| 58  | 71  | FTVHMLYVHI NA | NA |
| 25  | 30  | NSHMALVGVI NA | NA |
| 47  | 43  | NDVYRLELLT NA | NA |
| 54  | 77  | CQVYRLELIT NA | NA |
| 28  | 33  | WSVYRLELMR NA | NA |
| 52  | 72  | EFVYRLELLT NA | NA |
| 11  | 23  | WAVYRLELVF NA | NA |
| 27  | 39  | GMVYRLELEL NA | NA |
| 152 | 197 | LKVYRLELPH NA | NA |
| 44  | 55  | INVYRLELMI NA | NA |
| 21  | 30  | GWVYRLELQF NA | NA |
| 57  | 51  | CWVYRLELGI NA | NA |
| 33  | 30  | RHMGSLTFNT NA | NA |
| 61  | 65  | CNAESLTFNT NA | NA |
| 36  | 47  | KRIESLTFNT NA | NA |
| 87  | 116 | NWIHSLSVWK NA | NA |
| 53  | 69  | SQIQSLSVWK NA | NA |
| 46  | 72  | TWAKMLIMHH NA | NA |
| 35  | 37  | CNMRLVVKL NA  | NA |
| 40  | 50  | LTVMRLVVRS NA | NA |
| 25  | 29  | LSVMRLVVIS NA | NA |
| 13  | 26  | EKMRLVVKG NA  | NA |
| 34  | 43  | DSVMRLVVGs NA | NA |
| 38  | 51  | FMVMRLVVPL NA | NA |
| 13  | 25  | EFVMRLVVMV NA | NA |
| 17  | 22  | DTVMRLVVAG NA | NA |
| 67  | 56  | TNVMRLVVVH NA | NA |
| 12  | 15  | CWVMRLVVKG NA | NA |
| 32  | 24  | WMVMRLVVET NA | NA |
| 42  | 48  | NSPQLLQLSW NA | NA |
| 44  | 43  | YKAFTMAGSH NA | NA |
| 217 | 244 | TWYHSLNQRL NA | NA |
| 51  | 71  | SPAFSLNQRL NA | NA |
| 30  | 37  | DSSISLNQRL NA | NA |
| 138 | 147 | VKAVSLNQRL NA | NA |

|     |     |                |    |
|-----|-----|----------------|----|
| 34  | 38  | KPVSALMGQG NA  | NA |
| 37  | 31  | KPVSALMSHF NA  | NA |
| 28  | 46  | KPVSALVMNS NA  | NA |
| 30  | 28  | KPVSALTYPQ NA  | NA |
| 19  | 30  | KPVSALQOTA NA  | NA |
| 27  | 27  | KPVSALTMEG NA  | NA |
| 47  | 95  | KPVSALTDKL NA  | NA |
| 107 | 91  | SHVHRLMMGY NA  | NA |
| 109 | 97  | AKYHRLMMGG NA  | NA |
| 114 | 126 | HTVHRLMMGW NA  | NA |
| 52  | 81  | RMMHRLMMGG NA  | NA |
| 19  | 21  | EAPHRLMMGG NA  | NA |
| 53  | 72  | RYMVPLHQTK NA  | NA |
| 103 | 119 | THFHRLRLAI NA  | NA |
| 112 | 169 | YDYGRLRLAI NA  | NA |
| 14  | 17  | SCAQELTGHI NA  | NA |
| 6   | 3   | KCAQELTSVA NA  | NA |
| 58  | 65  | ACAQELTRHI NA  | NA |
| 23  | 24  | SCAQELTGMQ NA  | NA |
| 19  | 32  | ECAQELTRRY NA  | NA |
| 12  | 12  | VCAQELTVPK NA  | NA |
| 11  | 23  | VCAQELTATF NA  | NA |
| 16  | 21  | SCAQELTDWY NA  | NA |
| 21  | 11  | WCAQELTMVT NA  | NA |
| 49  | 50  | VCAQELTAKR NA  | NA |
| 31  | 32  | RGVWKLIGVG NA  | NA |
| 93  | 83  | HKIALLFIRGI NA | NA |
| 70  | 87  | VLFALHQMI NA   | NA |
| 84  | 90  | TSPGLLHKHS NA  | NA |
| 40  | 41  | TSPGLLFQPH NA  | NA |
| 37  | 48  | TSPGLLTLRS NA  | NA |
| 169 | 209 | MPMGRLHAVL NA  | NA |
| 42  | 58  | MPMGRLKGNS NA  | NA |
| 47  | 54  | MPMGRLVMVS NA  | NA |
| 75  | 91  | MPMGRLRGKH NA  | NA |
| 56  | 64  | MPMGRLRQNI NA  | NA |
| 40  | 52  | MPMGRLVVKG NA  | NA |
| 88  | 133 | MPMGRLFRSF NA  | NA |
| 45  | 49  | EHPGLLFSIS NA  | NA |
| 54  | 63  | EHPGLLAGGY NA  | NA |
| 44  | 74  | EHPGLLTQMY NA  | NA |

|     |                   |    |
|-----|-------------------|----|
| 40  | 51 EHPGLLTGQF NA  | NA |
| 91  | 117 YSTLRVSAAQ NA | NA |
| 37  | 54 EAIGRLWDAT NA  | NA |
| 60  | 47 EAIGRLFVIL NA  | NA |
| 70  | 74 HVVAQLQNKR NA  | NA |
| 42  | 45 HVVAQLHDQL NA  | NA |
| 131 | 186 HVVAQLSGWH NA | NA |
| 60  | 64 HVVAQLQDVK NA  | NA |
| 62  | 88 VDVSFLMARQ NA  | NA |
| 44  | 62 VDVSFLTMHH NA  | NA |
| 39  | 47 VDVSFLSGGA NA  | NA |
| 35  | 40 VDVSFLMYTG NA  | NA |
| 44  | 41 VDVSFLVGAT NA  | NA |
| 44  | 38 VDVSFLVVAK NA  | NA |
| 34  | 37 NAPNALVRNQ NA  | NA |
| 47  | 49 FQIGSLHSEQ NA  | NA |
| 64  | 62 FQIGSLHDGF NA  | NA |
| 262 | 334 WNPSYLHVHG NA | NA |
| 56  | 73 PKPARLTGNV NA  | NA |
| 41  | 52 PKPARLVAPL NA  | NA |
| 22  | 37 ILLSPLHAPS NA  | NA |
| 33  | 34 ILLSPLHKLK NA  | NA |
| 39  | 37 MWVLSLTYMG NA  | NA |
| 41  | 61 WAINALHRAG NA  | NA |
| 7   | 10 WAINALFVSS NA  | NA |
| 32  | 46 WAINALAQLK NA  | NA |
| 51  | 53 WAINALMAGG NA  | NA |
| 13  | 30 QRPMDLQGWL NA  | NA |
| 13  | 16 QRPMDLTASA NA  | NA |
| 26  | 17 QRPMDLKQIY NA  | NA |
| 21  | 25 QRPMDLKSGY NA  | NA |
| 77  | 77 QRPMDLKSGI NA  | NA |
| 28  | 20 PQMGSLHCTL NA  | NA |
| 15  | 23 PQMGSLHSLI NA  | NA |
| 40  | 38 PQMGSLAGNQ NA  | NA |
| 25  | 42 SAMNNLTVKT NA  | NA |
| 59  | 63 QMPGRLSMAF NA  | NA |
| 96  | 121 NMPGRLSAVQ NA | NA |
| 93  | 112 FMPGRLSNWI NA | NA |
| 61  | 66 CMPGRLSKEH NA  | NA |
| 44  | 66 TMPGRLSDQY NA  | NA |

|     |     |               |    |
|-----|-----|---------------|----|
| 87  | 121 | LMPGRLSANR NA | NA |
| 86  | 105 | TMPGRLSQRI NA | NA |
| 67  | 80  | GMPGRLSKWA NA | NA |
| 51  | 57  | VMPGRLSGQR NA | NA |
| 87  | 103 | SMPGRLSNLS NA | NA |
| 35  | 47  | RDMSYLFMQG NA | NA |
| 58  | 55  | RDMSYLFVLL NA | NA |
| 47  | 51  | RDMSYLTNRL NA | NA |
| 73  | 70  | SQLGLLFGGW NA | NA |
| 24  | 32  | RDLGFLFGET NA | NA |
| 22  | 34  | RDLGFLHDGQ NA | NA |
| 47  | 61  | CTPSRLTFML NA | NA |
| 119 | 146 | MKPSRLTFHT NA | NA |
| 36  | 33  | SNPSRLTFVT NA | NA |
| 44  | 57  | WIPSRLTFNG NA | NA |
| 48  | 71  | AQPSRLTFKH NA | NA |
| 34  | 46  | NDPSRLTFAW NA | NA |
| 33  | 41  | RDPSRLTFHQ NA | NA |
| 46  | 55  | EHPSRLTFIT NA | NA |
| 30  | 35  | PAPSRLTFKA NA | NA |
| 83  | 98  | SKPWKLQYQV NA | NA |
| 57  | 85  | SKPWKLQANY NA | NA |
| 45  | 56  | SKPWKLQKGQ NA | NA |
| 16  | 37  | EGPMRLHYTS NA | NA |
| 82  | 109 | EGPMRLHMHA NA | NA |
| 33  | 35  | FDVWMLSQML NA | NA |
| 31  | 42  | FDVWMLTDMK NA | NA |
| 20  | 23  | FDVWMLFAGF NA | NA |
| 36  | 52  | FDVWMLTRMH NA | NA |
| 9   | 20  | FDVWMLFMLG NA | NA |
| 37  | 48  | NSPSDLHGMA NA | NA |
| 11  | 17  | NSPSDLSNIG NA | NA |
| 34  | 28  | NSPSDLAKLY NA | NA |
| 44  | 40  | NSPSDLVDVH NA | NA |
| 12  | 10  | NSPSDLTLMH NA | NA |
| 27  | 47  | NSPSDLSLHI NA | NA |
| 24  | 16  | NSPSDLVSKS NA | NA |
| 18  | 22  | SKPNFLSKNT NA | NA |
| 61  | 71  | SKPNFLVGIT NA | NA |
| 89  | 109 | SKPNFLVKPH NA | NA |
| 73  | 106 | SKPNFLVVKQ NA | NA |

|     |     |            |    |    |
|-----|-----|------------|----|----|
| 14  | 8   | SKPNFLTRSS | NA | NA |
| 58  | 48  | SKPNFLMAVL | NA | NA |
| 28  | 22  | SKPNFLSDSY | NA | NA |
| 25  | 25  | IGALALVDVT | NA | NA |
| 27  | 52  | IGALALVAPI | NA | NA |
| 81  | 110 | RLANALFKGI | NA | NA |
| 50  | 55  | RLANALVYES | NA | NA |
| 64  | 89  | RLANALAGNW | NA | NA |
| 34  | 51  | ERSLNLSYTQ | NA | NA |
| 5   | 3   | ERSLNLTNLH | NA | NA |
| 95  | 113 | ERSLNLFVRA | NA | NA |
| 83  | 89  | ARIEYLHRQG | NA | NA |
| 36  | 37  | DRPNYLAATR | NA | NA |
| 31  | 48  | DRPNYLSRIQ | NA | NA |
| 73  | 88  | DRPNYLHNNR | NA | NA |
| 37  | 38  | DRPNYLVYKK | NA | NA |
| 67  | 66  | DRPNYLSVAV | NA | NA |
| 38  | 25  | DRPNYLALPV | NA | NA |
| 57  | 77  | DRPNYLFVSR | NA | NA |
| 6   | 22  | DRPNYLHKSS | NA | NA |
| 18  | 34  | AVANSLAQMS | NA | NA |
| 34  | 24  | AVANSLALEA | NA | NA |
| 26  | 29  | AVANSLSAVG | NA | NA |
| 30  | 25  | AVANSLTGPA | NA | NA |
| 51  | 60  | WMESLFAHG  | NA | NA |
| 60  | 79  | WMESLFNAH  | NA | NA |
| 102 | 138 | PCHLALTYGH | NA | NA |
| 39  | 57  | PCHLALTVTR | NA | NA |
| 45  | 42  | ARPEFLFMAT | NA | NA |
| 66  | 72  | WPHGSLSNLS | NA | NA |
| 15  | 21  | WPHGSLQGGG | NA | NA |
| 34  | 34  | WPHGSLMNMG | NA | NA |
| 48  | 42  | WPHGSLALIA | NA | NA |
| 46  | 61  | WPHGSLQAAR | NA | NA |
| 81  | 102 | WPHGSLSRGQ | NA | NA |
| 41  | 60  | WPHGSLQGNR | NA | NA |
| 62  | 83  | NRVEMLHALT | NA | NA |
| 67  | 79  | NRVEMLFKRH | NA | NA |
| 57  | 79  | NRVEMLHVGQ | NA | NA |
| 43  | 58  | VLPEPLVDLR | NA | NA |
| 59  | 75  | VLPEPLHNLL | NA | NA |

|     |                   |    |
|-----|-------------------|----|
| 46  | 54 VLPEPLFMQT NA  | NA |
| 39  | 42 KAVNHLSKNS NA  | NA |
| 48  | 58 WPMAKLHNPT NA  | NA |
| 123 | 137 PKMSHLFRIW NA | NA |
| 85  | 119 PKMSHLTREH NA | NA |
| 35  | 47 PKMSHLTYSR NA  | NA |
| 129 | 166 PKMSHLSNWG NA | NA |
| 37  | 43 PRVHHLVGES NA  | NA |
| 60  | 89 PQFGRLWATP NA  | NA |
| 48  | 77 RFGARLRVLK NA  | NA |
| 67  | 78 VSMGRLRVLK NA  | NA |
| 31  | 39 SNLNSIFALG NA  | NA |
| 23  | 29 SFPNPLASGG NA  | NA |
| 36  | 39 SFPNPLYKRY NA  | NA |
| 19  | 25 SFPNPLMKVT NA  | NA |
| 31  | 29 SFPNPLFRTG NA  | NA |
| 23  | 28 SFPNPLYNEW NA  | NA |
| 32  | 34 SFPNPLAKVI NA  | NA |
| 36  | 38 SFPNPLMMVV NA  | NA |
| 37  | 55 SFPNPLYNAL NA  | NA |
| 70  | 90 TRIAYLHGAL NA  | NA |
| 115 | 115 NDMWRLRIGL NA | NA |
| 43  | 53 TRVAYLSREH NA  | NA |
| 43  | 77 ERVAYLSGAI NA  | NA |
| 33  | 53 VRVAYLSVSI NA  | NA |
| 50  | 51 DRVAYLSYGY NA  | NA |
| 58  | 84 KRVAYLSRAH NA  | NA |
| 43  | 58 GRVAYLSQGT NA  | NA |
| 60  | 56 YRVAYLSKWG NA  | NA |
| 90  | 123 DRVAYLSLMW NA | NA |
| 40  | 42 YRVAYLSKNH NA  | NA |
| 57  | 77 MRVAYLSAWL NA  | NA |
| 39  | 54 PRVAYLSYSL NA  | NA |
| 82  | 111 SKMAHLFGRW NA | NA |
| 30  | 55 SKMAHLFGLR NA  | NA |
| 53  | 66 VQQQGLSRAG NA  | NA |
| 61  | 63 EHAWNLVLIR NA  | NA |
| 39  | 30 HTSNWLFSNY NA  | NA |
| 109 | 140 ELSLALHYAK NA | NA |
| 40  | 64 ELSLALFRGG NA  | NA |
| 19  | 24 ELSLALFQQT NA  | NA |



|     |     |               |    |
|-----|-----|---------------|----|
| 53  | 78  | ELSLALAGSL NA | NA |
| 63  | 61  | ELSLALANSR NA | NA |
| 35  | 53  | ELSLALVYTS NA | NA |
| 75  | 80  | ELSLALSDGL NA | NA |
| 40  | 66  | ELSLALTNSQ NA | NA |
| 38  | 37  | TVVAYIFDTG NA | NA |
| 13  | 25  | TVVAYIFDRS NA | NA |
| 47  | 50  | WDALGIVLTK NA | NA |
| 42  | 53  | WDALGIVAGF NA | NA |
| 37  | 60  | WDALGIVSMQ NA | NA |
| 87  | 116 | ERSLAWHRIG NA | NA |
| 102 | 121 | ERSLAWFAGR NA | NA |
| 34  | 42  | RLANNLMNQI NA | NA |
| 112 | 129 | RLANNLTRLW NA | NA |
| 53  | 56  | RLANNLTQHI NA | NA |
| 79  | 112 | DRQLSLSKLQ NA | NA |
| 31  | 45  | DRQLSLSATI NA | NA |
| 35  | 37  | DRQLSLFNNS NA | NA |
| 37  | 36  | DRQLSLFNNT NA | NA |
| 43  | 56  | DRQLSLFMEG NA | NA |
| 33  | 51  | DRQLSLTAGA NA | NA |
| 34  | 47  | NHVVPLALWT NA | NA |
| 91  | 106 | NHVVPLHYGY NA | NA |
| 68  | 87  | NHVVPLQGEI NA | NA |
| 51  | 63  | NHVVPLSKAG NA | NA |
| 50  | 75  | NHVVPLVLQG NA | NA |
| 89  | 128 | NHVVPLMGNW NA | NA |
| 39  | 61  | NHVVPLYQKT NA | NA |
| 32  | 55  | NHVVPLMRVG NA | NA |
| 61  | 80  | NHVVPLMAIS NA | NA |
| 37  | 47  | RTASHLSGSV NA | NA |
| 132 | 156 | FQVDYLMNHY NA | NA |
| 55  | 87  | AQVDYLMNKF NA | NA |
| 56  | 57  | PQVDYLMYPG NA | NA |
| 80  | 107 | GQVDYLMYMQ NA | NA |
| 381 | 486 | YQVDYLMKRW NA | NA |
| 34  | 27  | AQVDYLMGQG NA | NA |
| 61  | 91  | MQVDYLMVKQ NA | NA |
| 47  | 64  | GQVDYLMGPY NA | NA |
| 38  | 30  | GQVDYLMQWG NA | NA |
| 12  | 23  | QRMASLHMMQ NA | NA |

|     |     |                |    |
|-----|-----|----------------|----|
| 51  | 68  | ISVNYLVGVF NA  | NA |
| 34  | 40  | GSVNYLVRVR NA  | NA |
| 18  | 26  | ISVNYLVSRR NA  | NA |
| 31  | 33  | ISVNYLVRPW NA  | NA |
| 67  | 75  | RSVNYLVGHG NA  | NA |
| 53  | 52  | RSVNYLVVVK NA  | NA |
| 4   | 11  | SSVNYLVGPF NA  | NA |
| 58  | 53  | CSVNYLVKTV NA  | NA |
| 27  | 27  | ISVNYLFRAS NA  | NA |
| 22  | 24  | ISVNYLTDLG NA  | NA |
| 31  | 45  | ISVNYLSKEH NA  | NA |
| 32  | 44  | ISVNYLFQGI NA  | NA |
| 33  | 36  | ISVNYLHSGK NA  | NA |
| 43  | 47  | QDGKRLRVKR NA  | NA |
| 64  | 87  | KWVSMLHYII NA  | NA |
| 56  | 64  | KWVSMLHGWI NA  | NA |
| 23  | 23  | FSQLAMFVVG NA  | NA |
| 32  | 35  | NTSAWLTSNA NA  | NA |
| 17  | 22  | NTSAWLTRVA NA  | NA |
| 53  | 33  | NTSAWLSGGF NA  | NA |
| 20  | 29  | GLPDLFLAGPI NA | NA |
| 38  | 44  | GLPDLFLAGVA NA | NA |
| 60  | 72  | GLPDLHRKG NA   | NA |
| 22  | 25  | GLPDLQRPQ NA   | NA |
| 33  | 33  | GLPDLFGMG NA   | NA |
| 50  | 56  | GLPDLAGEK NA   | NA |
| 35  | 47  | GLPDLVMNT NA   | NA |
| 28  | 25  | GLPDLVVSF NA   | NA |
| 12  | 15  | WKVSSLFRSS NA  | NA |
| 33  | 27  | YCSLPLFNVA NA  | NA |
| 32  | 53  | YCSLPLARAA NA  | NA |
| 31  | 30  | YCSLPLFGVH NA  | NA |
| 9   | 9   | YCSLPLLPG NA   | NA |
| 44  | 43  | YCSLPLKVKH NA  | NA |
| 43  | 49  | YCSLPLKNPS NA  | NA |
| 79  | 83  | YCSLPLFRGG NA  | NA |
| 24  | 50  | YCSLPLKGIA NA  | NA |
| 125 | 148 | YCSLPLQKRH NA  | NA |
| 50  | 59  | MGMWHLFGGW NA  | NA |
| 68  | 82  | MGMWHLFYQV NA  | NA |
| 49  | 84  | MGMWHLTDKQ NA  | NA |

|     |                   |    |
|-----|-------------------|----|
| 57  | 66 ENAAALTMPF NA  | NA |
| 76  | 79 RQSAALTMPS NA  | NA |
| 78  | 115 DWSAALTMPR NA | NA |
| 6   | 11 RAPSMLFVNS NA  | NA |
| 58  | 55 HAHASLVNMV NA  | NA |
| 44  | 44 SIHLALVVGL NA  | NA |
| 36  | 38 PRVWLLSNMV NA  | NA |
| 40  | 23 PRVWLLTRRY NA  | NA |
| 33  | 34 PRVWLLSKNT NA  | NA |
| 31  | 38 PRVWLLQYRK NA  | NA |
| 47  | 56 PRVWLLTVLR NA  | NA |
| 48  | 63 RSHASLVRNF NA  | NA |
| 36  | 33 RSHASLVYGS NA  | NA |
| 41  | 41 TVLNLSLHAIH NA | NA |
| 25  | 33 TVLNLSLSGIL NA | NA |
| 17  | 17 TVLNLSLSDVG NA | NA |
| 40  | 27 TVLNLSLSGKK NA | NA |
| 67  | 71 EMSWGLFKKS NA  | NA |
| 116 | 168 EMSWGLSRQA NA | NA |
| 92  | 79 EMSWGLMSQS NA  | NA |
| 69  | 99 EMSWGLTQRF NA  | NA |
| 112 | 120 EMSWGLFAGW NA | NA |
| 10  | 11 VRLNYLTDPA NA  | NA |
| 57  | 75 VRLNYLTAGG NA  | NA |
| 31  | 45 VRLNYLFLGA NA  | NA |
| 34  | 32 AGPQPLTLTG NA  | NA |
| 17  | 28 AGPQPLTYAY NA  | NA |
| 17  | 35 QVSWAWVDPI NA  | NA |
| 27  | 43 HNANYLQGWG NA  | NA |
| 77  | 84 HNANYLMNVA NA  | NA |
| 26  | 34 HNANYLQGER NA  | NA |
| 22  | 24 HNANYLQRKR NA  | NA |
| 83  | 113 HNANYLWKPF NA | NA |
| 24  | 33 HNANYLTSWT NA  | NA |
| 83  | 94 HNANYLVGRS NA  | NA |
| 72  | 104 HNANYLADHK NA | NA |
| 25  | 36 HNANYLQDPG NA  | NA |
| 35  | 47 IAFSQLVNLV NA  | NA |
| 17  | 24 IAFSQLSDAS NA  | NA |
| 72  | 66 IAFSQLHVMY NA  | NA |
| 58  | 66 EQAWYLMGKH NA  | NA |

|     |     |                |    |
|-----|-----|----------------|----|
| 53  | 79  | EQAWYLV SPL NA | NA |
| 113 | 124 | EQAWYLLAHY NA  | NA |
| 44  | 61  | EQAWYLVYGT NA  | NA |
| 77  | 75  | EQAWYLF SQ NA  | NA |
| 68  | 81  | EQAWYLIMGA NA  | NA |
| 42  | 50  | EQAWYLYGR NA   | NA |
| 33  | 60  | EQAWYLAYTF NA  | NA |
| 64  | 67  | EQAWYLASHT NA  | NA |
| 43  | 44  | EQAWYLSKIV NA  | NA |
| 16  | 21  | LVGNSLFGGI NA  | NA |
| 25  | 23  | GSVWALFGET NA  | NA |
| 134 | 165 | RYAQPLYHYI NA  | NA |
| 54  | 79  | RYAQPLYLRR NA  | NA |
| 36  | 53  | RYAQPLAGLK NA  | NA |
| 38  | 31  | RYAQPLMDIS NA  | NA |
| 31  | 61  | RYAQPLTYMG NA  | NA |
| 74  | 71  | FPVLSLSQLK NA  | NA |
| 50  | 63  | FPVLSLTAAQ NA  | NA |
| 52  | 44  | FPVLSLTKWR NA  | NA |
| 95  | 130 | RMLAQLHRIR NA  | NA |
| 46  | 53  | LLFSQLSMLS NA  | NA |
| 34  | 53  | LLFSQLHYKF NA  | NA |
| 33  | 35  | LLFSQLSQKA NA  | NA |
| 93  | 114 | PQVWYLHYLQ NA  | NA |
| 59  | 91  | PQVWYLKRHH NA  | NA |
| 57  | 60  | PQVWYLFGR NA   | NA |
| 68  | 68  | PQVWYLTDTW NA  | NA |
| 56  | 64  | PQVWYLFNIT NA  | NA |
| 50  | 55  | PQVWYLF GVI NA | NA |
| 37  | 50  | PQVWYLA AIG NA | NA |
| 53  | 60  | PQVWYLMRML NA  | NA |
| 45  | 54  | PQVWYLQVNA NA  | NA |
| 44  | 39  | GMAQYLFMAI NA  | NA |
| 87  | 111 | GMAQYLVGHA NA  | NA |
| 48  | 55  | GMAQYLVGPS NA  | NA |
| 75  | 67  | GMAQYLF GPH NA | NA |
| 76  | 81  | GMAQYLTQSW NA  | NA |
| 65  | 68  | VDLWYLSAGL NA  | NA |
| 82  | 97  | AQLWYLSAQF NA  | NA |
| 63  | 74  | QRLWYLSANG NA  | NA |
| 61  | 71  | KQLWYLSAIG NA  | NA |

|     |                   |    |
|-----|-------------------|----|
| 45  | 70 RKLWYLSAHI NA  | NA |
| 87  | 93 GALWYLSARH NA  | NA |
| 96  | 89 PILWYLSAGW NA  | NA |
| 21  | 33 NWLWYLSAWI NA  | NA |
| 59  | 63 IEAWSLVGGG NA  | NA |
| 69  | 79 IEAWSLTDEQ NA  | NA |
| 66  | 78 IEAWSLSVLY NA  | NA |
| 81  | 106 IEAWSLVKLF NA | NA |
| 106 | 104 IEAWSLSAIH NA | NA |
| 35  | 57 IASMRLVLAS NA  | NA |
| 68  | 61 FHSMRLVLGG NA  | NA |
| 60  | 69 FQSMRLVLLW NA  | NA |
| 90  | 104 FKSMLVLSQ NA  | NA |
| 119 | 166 MQSMRLVLHY NA | NA |
| 39  | 45 NDSMRLVLRK NA  | NA |
| 10  | 16 QMSMRLVLIL NA  | NA |
| 37  | 35 VSSMRLVLMI NA  | NA |
| 55  | 74 RYSMRLVLEK NA  | NA |
| 51  | 66 EKSMRLVLST NA  | NA |
| 58  | 86 RILGYLHRAG NA  | NA |
| 23  | 32 PRVMLLFATG NA  | NA |
| 72  | 100 HNHGSLVNLL NA | NA |
| 81  | 93 ATHGSLVLRN NA  | NA |
| 90  | 106 SQPHLLFYGQ NA | NA |
| 101 | 96 IIAHQLKMGK NA  | NA |
| 91  | 92 HIAHQLKMSY NA  | NA |
| 121 | 130 WIAHQLKDMH NA | NA |
| 51  | 74 CIAHQLKGQY NA  | NA |
| 45  | 56 HIAHQLKVQR NA  | NA |
| 70  | 68 KIAHQLKKPH NA  | NA |
| 48  | 48 SIAHQLKNPK NA  | NA |
| 75  | 79 PIAHQLKNQR NA  | NA |
| 29  | 31 LIAHQLKDQS NA  | NA |
| 135 | 152 EIAHQLKNAW NA | NA |
| 38  | 60 EQSWMLKLQP NA  | NA |
| 18  | 17 TSVKMLKLQP NA  | NA |
| 61  | 84 NSARQLVLLW NA  | NA |
| 78  | 124 IKARQLVLKI NA | NA |
| 41  | 66 DDARQLVLIA NA  | NA |
| 55  | 58 HAARQLVLTG NA  | NA |
| 43  | 39 TDARQLVLAG NA  | NA |

|     |     |               |    |
|-----|-----|---------------|----|
| 73  | 93  | KFARQLVLRV NA | NA |
| 28  | 31  | WPARQLVLGV NA | NA |
| 65  | 65  | SMARQLVLPY NA | NA |
| 26  | 15  | MISFALTMIY NA | NA |
| 27  | 27  | QISFALTAGS NA | NA |
| 34  | 32  | HISFALTVAT NA | NA |
| 24  | 29  | HISFALTVQG NA | NA |
| 35  | 44  | WISFALTDLY NA | NA |
| 45  | 73  | CISFALTKVW NA | NA |
| 38  | 51  | LISFALTMLQ NA | NA |
| 55  | 70  | YISFALTVMK NA | NA |
| 36  | 38  | RVTWALSYPK NA | NA |
| 52  | 50  | RPSGALQRLP NA | NA |
| 24  | 17  | FDAGALQRLP NA | NA |
| 28  | 36  | TYASALTMPL NA | NA |
| 79  | 81  | QHGGALTMPL NA | NA |
| 129 | 143 | NVAGALYAHA NA | NA |
| 46  | 60  | IVAGALYDKG NA | NA |
| 58  | 55  | EVAGALYYAI NA | NA |
| 31  | 35  | PVAGALYGIT NA | NA |
| 53  | 59  | NVAGALYVPL NA | NA |
| 64  | 66  | RVAGALYSGF NA | NA |
| 46  | 50  | PVAGALYVMT NA | NA |
| 44  | 59  | PVAGALYDRQ NA | NA |
| 58  | 65  | KVAGALYRMG NA | NA |
| 27  | 38  | GVAGALYQPA NA | NA |
| 86  | 92  | YRVHRLSGPL NA | NA |
| 36  | 42  | ERVHRLSKTW NA | NA |
| 46  | 41  | TRVHRLSYWF NA | NA |
| 64  | 77  | ARVHRLSGEK NA | NA |
| 65  | 86  | NRVHRLSVLQ NA | NA |
| 98  | 122 | PRVHRLSLRL NA | NA |
| 24  | 31  | PRVHRLSSKS NA | NA |
| 28  | 41  | RRVHRLSSQK NA | NA |
| 110 | 123 | YRVHRLSQGY NA | NA |
| 35  | 42  | ERPGWLHAVQ NA | NA |
| 54  | 58  | TIPKRLQFL NA  | NA |
| 41  | 52  | WTHHRLQFL NA  | NA |
| 104 | 130 | HHINMLTLWG NA | NA |
| 19  | 15  | YFINMLTLQI NA | NA |
| 49  | 41  | PPINMLTLKQ NA | NA |

|     |     |                |    |
|-----|-----|----------------|----|
| 48  | 52  | EFINMLTLIS NA  | NA |
| 24  | 24  | ISINMLTLMG NA  | NA |
| 40  | 38  | ESINMLTLWI NA  | NA |
| 29  | 23  | QAINMLTLTV NA  | NA |
| 54  | 75  | RIINMLTLHK NA  | NA |
| 62  | 83  | EFINMLTLKH NA  | NA |
| 26  | 30  | GPINMLTLRG NA  | NA |
| 70  | 72  | AGLDLLSGLG NA  | NA |
| 31  | 57  | AGLDLLHMTS NA  | NA |
| 22  | 33  | AGLDLLHKLK NA  | NA |
| 32  | 40  | AGLDLLSGSI NA  | NA |
| 23  | 32  | RDGGPLMLPF NA  | NA |
| 21  | 20  | KAMGPLMLPF NA  | NA |
| 35  | 44  | WMAHFLMSWM NA  | NA |
| 28  | 41  | YFIGFLMSWM NA  | NA |
| 81  | 99  | KMSWFLMSWM NA  | NA |
| 60  | 84  | RHHNFLMSWM NA  | NA |
| 64  | 57  | FTIWKLTAMK NA  | NA |
| 111 | 126 | CKIWKLTAWQ NA  | NA |
| 52  | 61  | AHIWKLTAVR NA  | NA |
| 41  | 61  | YYIWKLTAGF NA  | NA |
| 81  | 91  | MQIWKLTAWS NA  | NA |
| 51  | 62  | RNIWKLTA SV NA | NA |
| 54  | 64  | VPIWKLTAQR NA  | NA |
| 59  | 79  | WPIWKLTAGL NA  | NA |
| 61  | 73  | QIIWKLTA AV NA | NA |
| 42  | 47  | GYIWKLTAGW NA  | NA |
| 52  | 74  | NTIWKLTAGV NA  | NA |
| 62  | 95  | DQGNRLMRLH NA  | NA |
| 54  | 66  | WTYNRLMRLQ NA  | NA |
| 46  | 58  | NWYNRLMRLI NA  | NA |
| 63  | 74  | DNSNRLMRLS NA  | NA |
| 77  | 89  | DSINRLMRLH NA  | NA |
| 66  | 55  | MPPNRLMRLV NA  | NA |
| 27  | 51  | RIVNRLMRLV NA  | NA |
| 47  | 89  | WHFNRLMRLH NA  | NA |
| 38  | 72  | IDANRLMRLF NA  | NA |
| 40  | 53  | LQPNRLMRLQ NA  | NA |
| 63  | 91  | QKMNRLMRLG NA  | NA |
| 51  | 62  | WSVQLLSMGY NA  | NA |
| 19  | 23  | NISEALQVPT NA  | NA |

|     |                   |    |
|-----|-------------------|----|
| 61  | 64 VWGARLVLRV NA  | NA |
| 55  | 79 CSVKRLVLRV NA  | NA |
| 51  | 90 SFINRLVLRV NA  | NA |
| 23  | 27 YTFWRLVLRV NA  | NA |
| 54  | 62 YFGGRLVLRV NA  | NA |
| 253 | 314 ASPSDLHARW NA | NA |
| 40  | 54 VDPSDLHASK NA  | NA |
| 51  | 63 GYPSDLHAKY NA  | NA |
| 74  | 68 IQPSDLHAGY NA  | NA |
| 16  | 14 IAPSDLHAPQ NA  | NA |
| 31  | 38 MAPSDLHAEI NA  | NA |
| 34  | 37 IQPSDLHAPR NA  | NA |
| 49  | 44 GDPSDLHAHL NA  | NA |
| 54  | 85 FMPSDLHALF NA  | NA |
| 42  | 52 IMMAYLHGNG NA  | NA |
| 30  | 49 IMMAYLTNGW NA  | NA |
| 55  | 58 IMMAYLTSVV NA  | NA |
| 41  | 57 GTIFRLHVLK NA  | NA |
| 41  | 55 GTIFRLFNKH NA  | NA |
| 37  | 31 QRMDLLFMPS NA  | NA |
| 2   | 5 QRMDLLMQNF NA   | NA |
| 37  | 34 QRMDLLFYGH NA  | NA |
| 309 | 394 QRMDLLARRL NA | NA |
| 31  | 40 QRMDLLSAIR NA  | NA |
| 35  | 37 QRMDLLRSQI NA  | NA |
| 35  | 26 QRMDLLQKQG NA  | NA |
| 24  | 24 QRMDLLMQRQ NA  | NA |
| 16  | 17 QRMDLLMVVG NA  | NA |
| 38  | 48 AWSMRLVLRV NA  | NA |
| 63  | 84 EYSMRLVLRW NA  | NA |
| 40  | 62 WSALALTLVL NA  | NA |
| 29  | 28 ESALALTGGG NA  | NA |
| 21  | 26 ESALALTSNG NA  | NA |
| 43  | 72 ISALALTVPR NA  | NA |
| 17  | 18 GSALALTDVI NA  | NA |
| 16  | 26 TSALALTYEY NA  | NA |
| 25  | 43 RSALALTDPA NA  | NA |
| 58  | 100 CSALALTKKY NA | NA |
| 91  | 130 YSALALTVRH NA | NA |
| 41  | 73 SSALALTVWG NA  | NA |
| 28  | 37 DQANSLVAIT NA  | NA |



|     |     |            |    |    |
|-----|-----|------------|----|----|
| 101 | 155 | HYANSLVARQ | NA | NA |
| 24  | 42  | VQANSLVAQV | NA | NA |
| 68  | 130 | MSANSLVAKK | NA | NA |
| 74  | 100 | HYANSLVARS | NA | NA |
| 41  | 64  | DTANSLVAEK | NA | NA |
| 35  | 34  | HAANSLVAQF | NA | NA |
| 32  | 40  | DWANSLVAKG | NA | NA |
| 97  | 118 | YSAKMLLMKQ | NA | NA |
| 49  | 56  | LATWPLSGLW | NA | NA |
| 55  | 66  | PQWPLSGHR  | NA | NA |
| 47  | 39  | CATWPLSGRT | NA | NA |
| 39  | 58  | DTTWPLSGTI | NA | NA |
| 42  | 72  | HNTWPLSGTV | NA | NA |
| 48  | 63  | NHTWPLSGGI | NA | NA |
| 52  | 73  | CTTWPLSGNV | NA | NA |
| 67  | 104 | CQWPLSGTL  | NA | NA |
| 55  | 84  | WPTWPLSGTT | NA | NA |
| 22  | 32  | HYVNLLLMVG | NA | NA |
| 51  | 54  | NIVNLLLMAL | NA | NA |
| 40  | 52  | GDVNLLLMWT | NA | NA |
| 2   | 6   | IAVNLLMLR  | NA | NA |
| 26  | 34  | GWVNLLMPT  | NA | NA |
| 59  | 100 | EIVNLLMLTL | NA | NA |
| 56  | 56  | NRVNLLLMGW | NA | NA |
| 64  | 71  | HHVNLLLMAY | NA | NA |
| 14  | 25  | VYVNLLLMGY | NA | NA |
| 66  | 81  | CRVNLLMSH  | NA | NA |
| 64  | 70  | TNVNLLMKR  | NA | NA |
| 72  | 84  | ATASFLSAKW | NA | NA |
| 23  | 58  | ATASFLMRSQ | NA | NA |
| 28  | 36  | ATASFLHRMI | NA | NA |
| 27  | 22  | ATASFLAMH  | NA | NA |
| 30  | 51  | ATASFLKDG  | NA | NA |
| 45  | 42  | ATASFLKRF  | NA | NA |
| 60  | 60  | ATASFLAYTQ | NA | NA |
| 11  | 23  | ATASFLVQMQ | NA | NA |
| 50  | 48  | RVLSRLFNSQ | NA | NA |
| 74  | 128 | GSHFLVRSL  | NA | NA |
| 25  | 34  | NSFWFLVRSL | NA | NA |
| 83  | 88  | AFASFLVRSL | NA | NA |
| 38  | 51  | FSAWFLVRSL | NA | NA |

|     |     |               |    |
|-----|-----|---------------|----|
| 118 | 155 | CQAHFLVRSL NA | NA |
| 25  | 26  | VSISFLHQQL NA | NA |
| 26  | 43  | HAHWQLLLRN NA | NA |
| 49  | 40  | GFVKQLLLRN NA | NA |
| 33  | 43  | FWSGQLLLRN NA | NA |
| 60  | 95  | RDLWKLHLLW NA | NA |
| 38  | 37  | TPVGWMHSLI NA | NA |
| 43  | 62  | KAALPLAMRV NA | NA |
| 30  | 52  | KAALPLVGGL NA | NA |
| 61  | 68  | KAALPLTGQG NA | NA |
| 30  | 45  | KAALPLVLNV NA | NA |
| 14  | 25  | RPAQDLRGTG NA | NA |
| 45  | 52  | RPAQDLYAMG NA | NA |
| 27  | 35  | RPAQDLVNTR NA | NA |
| 46  | 62  | RPAQDLLKTV NA | NA |
| 70  | 74  | RPAQDLHQVH NA | NA |
| 38  | 69  | RPAQDLKYRF NA | NA |
| 30  | 44  | RPAQDLFSMR NA | NA |
| 26  | 35  | RPAQDLAVNH NA | NA |
| 40  | 60  | RPAQDLKGHQ NA | NA |
| 44  | 43  | NTIDLLTYGA NA | NA |
| 53  | 65  | MTIDLLTMAT NA | NA |
| 19  | 29  | HTIDLLTMNL NA | NA |
| 29  | 48  | ATIDLLTYGG NA | NA |
| 30  | 40  | ITIDLLTQNH NA | NA |
| 26  | 22  | NTIDLLTGTS NA | NA |
| 53  | 61  | CTIDLLTRSA NA | NA |
| 38  | 30  | LTIDLLTDII NA | NA |
| 52  | 54  | WTIDLLTDLV NA | NA |
| 61  | 51  | STIDLLTLIG NA | NA |
| 53  | 51  | STIDLLTARI NA | NA |
| 80  | 85  | FRGARLVVRL NA | NA |
| 68  | 81  | WAFQRLVVRL NA | NA |
| 41  | 51  | YRVNRLVVRL NA | NA |
| 53  | 65  | IMMGRLVVRL NA | NA |
| 72  | 79  | MHGERLVVRL NA | NA |
| 121 | 140 | GISMYLHGGQ NA | NA |
| 66  | 78  | GISMYLSGKH NA | NA |
| 50  | 62  | GISMYLTRSA NA | NA |
| 43  | 57  | GISMYLSGQL NA | NA |
| 79  | 125 | IFSNRLNMRL NA | NA |

|     |     |            |    |    |
|-----|-----|------------|----|----|
| 168 | 181 | YHMKRLNMRL | NA | NA |
| 68  | 111 | YTVWRLNMRL | NA | NA |
| 97  | 132 | LQYNRLNMRL | NA | NA |
| 38  | 51  | RGMQNLFYSV | NA | NA |
| 35  | 47  | CPMQRLMAIS | NA | NA |
| 31  | 43  | GPMQRLMKRT | NA | NA |
| 19  | 29  | LPMQRLMLEI | NA | NA |
| 154 | 158 | KPMQRLMAHR | NA | NA |
| 36  | 40  | EPMQRLMNTY | NA | NA |
| 31  | 39  | RPMQRLMDEW | NA | NA |
| 19  | 13  | SPMQRLMSII | NA | NA |
| 11  | 12  | RPMQRLMRPY | NA | NA |
| 45  | 52  | YPMQRLMDVI | NA | NA |
| 65  | 92  | QPMQRLMNWV | NA | NA |
| 88  | 102 | IVNARLFVLW | NA | NA |
| 82  | 114 | IVNARLQKHF | NA | NA |
| 59  | 70  | IVNARLHVQG | NA | NA |
| 62  | 57  | IVNARLSKTG | NA | NA |
| 108 | 122 | IVNARLSQAY | NA | NA |
| 27  | 27  | KRSNFLRKMG | NA | NA |
| 42  | 30  | ELPNFLMRST | NA | NA |
| 46  | 53  | ELPNFLVKKG | NA | NA |
| 21  | 24  | ELPNFLAVVG | NA | NA |
| 50  | 55  | EVSQHLSSHA | NA | NA |
| 73  | 78  | QQHGPLRMWI | NA | NA |
| 32  | 50  | TMAHPLVQES | NA | NA |
| 27  | 33  | TMAHPLTSVW | NA | NA |
| 42  | 55  | TMAHPLTGEW | NA | NA |
| 32  | 33  | TMAHPLAQQI | NA | NA |
| 28  | 34  | TMAHPLFGPA | NA | NA |
| 53  | 39  | GKTWALTGTG | NA | NA |
| 70  | 53  | GKTWALVGLS | NA | NA |
| 81  | 72  | GKTWALVAMQ | NA | NA |
| 28  | 29  | GKTWALTYSW | NA | NA |
| 86  | 81  | TQAWALGMWF | NA | NA |
| 29  | 38  | WQAWALGKII | NA | NA |
| 67  | 92  | QQAWALGNRR | NA | NA |
| 73  | 76  | NQAWALGMGL | NA | NA |
| 50  | 72  | RQAWALGSGA | NA | NA |
| 64  | 115 | HQAWALGDLV | NA | NA |
| 62  | 82  | KQAWALGSWS | NA | NA |

|     |     |               |    |
|-----|-----|---------------|----|
| 56  | 64  | MQAWALGDKL NA | NA |
| 71  | 88  | AQAWALGSTF NA | NA |
| 69  | 92  | IQAWALGQQY NA | NA |
| 84  | 98  | RQAWALGYEQ NA | NA |
| 70  | 100 | ESAQMISYAH NA | NA |
| 32  | 32  | YFARQLSSIQ NA | NA |
| 35  | 40  | YFARQLLDGS NA | NA |
| 65  | 81  | YFARQLSMHI NA | NA |
| 44  | 52  | WVANMIQVQW NA | NA |
| 48  | 55  | WVANMIMNGW NA | NA |
| 39  | 52  | WVANMIKVPT NA | NA |
| 28  | 29  | WVANMIQDSS NA | NA |
| 27  | 35  | WVANMILLSG NA | NA |
| 64  | 56  | WVANMIKVLS NA | NA |
| 45  | 51  | WVANMIQRSG NA | NA |
| 68  | 82  | WVANMIQQVV NA | NA |
| 20  | 41  | WVANMILGGF NA | NA |
| 40  | 60  | SIPNALVASV NA | NA |
| 19  | 27  | IFINFLMQQR NA | NA |
| 52  | 53  | IFINFLVDLV NA | NA |
| 165 | 189 | IFINFLKRRR NA | NA |
| 15  | 18  | IFINFLTMIW NA | NA |
| 29  | 35  | IFINFLTYKW NA | NA |
| 44  | 50  | VDILHLTQIF NA | NA |
| 4   | 12  | QRANSIFGMS NA | NA |
| 36  | 48  | QRANSIHDHG NA | NA |
| 35  | 53  | KRAASLTDQG NA | NA |
| 69  | 91  | KRAASLVSWL NA | NA |
| 40  | 46  | CCSLALSALG NA | NA |
| 69  | 88  | CCSLALTGER NA | NA |
| 51  | 59  | CCSLALFNPH NA | NA |
| 122 | 164 | CCSLALHLSV NA | NA |
| 27  | 45  | CCSLALAGSG NA | NA |
| 120 | 126 | CCSLALANWW NA | NA |
| 77  | 79  | CCSLALTMAV NA | NA |
| 89  | 125 | CCSLALTLGY NA | NA |
| 4   | 7   | PYAENLFQQQ NA | NA |
| 86  | 81  | YTMLHLSDGA NA | NA |
| 53  | 77  | YTMLHLSDNG NA | NA |
| 67  | 96  | YTMLHLHAEI NA | NA |
| 117 | 140 | YTMLHLHMHS NA | NA |

|     |     |                |    |
|-----|-----|----------------|----|
| 100 | 116 | YTMLHLSGNF NA  | NA |
| 74  | 84  | YTMLHLFAMY NA  | NA |
| 64  | 96  | SRVLPLVSER NA  | NA |
| 140 | 183 | SRVLPLSYHG NA  | NA |
| 58  | 91  | SRVLPLQQHF NA  | NA |
| 55  | 63  | SRVLPLTSTA NA  | NA |
| 57  | 74  | SRVLPLVGGH NA  | NA |
| 42  | 54  | SRVLPLFGMV NA  | NA |
| 79  | 98  | YNVNYLAKMH NA  | NA |
| 38  | 66  | YNVNYLFGGS NA  | NA |
| 20  | 19  | YNVNYLADAG NA  | NA |
| 22  | 24  | YNVNYLFRVG NA  | NA |
| 239 | 289 | YNVNYLFKRW NA  | NA |
| 266 | 326 | YMHNRLLTKW NA  | NA |
| 58  | 75  | DIIWRLTLKW NA  | NA |
| 101 | 92  | KMVGRLTLKW NA  | NA |
| 109 | 135 | AAGGRLTLKW NA  | NA |
| 87  | 113 | CRGWRLTLKW NA  | NA |
| 100 | 99  | RASLRLTLKW NA  | NA |
| 117 | 141 | YKVGRLTLKW NA  | NA |
| 96  | 116 | AQVKRLTLKW NA  | NA |
| 160 | 208 | MNHFRLTLKW NA  | NA |
| 105 | 130 | RHMLGLHRAS NA  | NA |
| 60  | 51  | RHMLGLHSEK NA  | NA |
| 43  | 55  | ELAWHLVSGK NA  | NA |
| 60  | 66  | VKVGWGLFSGL NA | NA |
| 62  | 63  | VKVGWGLFDEW NA | NA |
| 88  | 97  | VKVGWGLFGHR NA | NA |
| 75  | 100 | CFGMALTSRF NA  | NA |
| 87  | 98  | RSGLALTSRF NA  | NA |
| 63  | 61  | CNADLIMVNG NA  | NA |
| 37  | 51  | DNADLIMVIG NA  | NA |
| 64  | 69  | NNADLIMMRI NA  | NA |
| 45  | 84  | MNADLIMYQR NA  | NA |
| 34  | 39  | VNADLIMQQS NA  | NA |
| 30  | 44  | ENADLIMVTI NA  | NA |
| 32  | 49  | YNADLIMLLA NA  | NA |
| 35  | 41  | RNADLIMDRT NA  | NA |
| 55  | 63  | GNADLIMARK NA  | NA |
| 40  | 50  | NNADLIMGNV NA  | NA |
| 52  | 58  | DMSNAYTMVA NA  | NA |

|     |     |               |    |
|-----|-----|---------------|----|
| 35  | 74  | KAGMALTHIR NA | NA |
| 52  | 64  | NAGMALTHIQ NA | NA |
| 54  | 79  | DEVWRLHYMK NA | NA |
| 84  | 89  | FEVWRLHVRR NA | NA |
| 85  | 87  | REWRLHYPK NA  | NA |
| 65  | 92  | QEVWRLHYMS NA | NA |
| 52  | 71  | KEVWRLHDVF NA | NA |
| 114 | 123 | GEVWRLHKLF NA | NA |
| 56  | 64  | GEVWRLHDIG NA | NA |
| 152 | 157 | HEVWRLHNRG NA | NA |
| 155 | 227 | DEVWRLHAHL NA | NA |
| 59  | 61  | YEVWRLHSPV NA | NA |
| 57  | 72  | IAAWGLNKLI NA | NA |
| 58  | 55  | FAAWGLNVHQ NA | NA |
| 43  | 45  | SAAWGLNAGA NA | NA |
| 28  | 41  | FAAWGLNQVH NA | NA |
| 52  | 65  | EAAWGLNNHI NA | NA |
| 74  | 91  | QAAWGLNVMK NA | NA |
| 52  | 70  | LAAWGLNVQH NA | NA |
| 171 | 244 | EWVHRLSYWG NA | NA |
| 34  | 24  | IQVHRLSYLH NA | NA |
| 273 | 286 | VDVHRLSYRH NA | NA |
| 81  | 92  | QTVHRLSYLA NA | NA |
| 84  | 106 | WWVHRLSYQI NA | NA |
| 139 | 182 | CIVHRLSYVV NA | NA |
| 60  | 82  | LSVHRLSYES NA | NA |
| 139 | 178 | GNVHRLSYVH NA | NA |
| 118 | 132 | YYVHRLSYNG NA | NA |
| 105 | 154 | FNVHRLSYMI NA | NA |
| 86  | 137 | IWVGHLSYWR NA | NA |
| 125 | 158 | CWVGHLSAGS NA | NA |
| 146 | 154 | GWVGHLSMHQ NA | NA |
| 107 | 110 | AWVGHLSVKA NA | NA |
| 59  | 71  | AWVGHLSGPA NA | NA |
| 57  | 61  | VWVGHLSYKF NA | NA |
| 52  | 69  | GRSARLTLWH NA | NA |
| 49  | 72  | LRSARLTLVQ NA | NA |
| 51  | 70  | TDSARLTLKG NA | NA |
| 58  | 82  | IRSARLTLGA NA | NA |
| 52  | 66  | KISARLTLGH NA | NA |
| 30  | 45  | AISARLTLHA NA | NA |

|     |     |                |    |
|-----|-----|----------------|----|
| 46  | 53  | LYSARLTLSK NA  | NA |
| 38  | 55  | NSSARLT LGV NA | NA |
| 39  | 54  | IDSARLT LGS NA | NA |
| 47  | 43  | LNSSALHRPG NA  | NA |
| 53  | 58  | DKVGALHRPG NA  | NA |
| 87  | 128 | QYAGRLRAES NA  | NA |
| 72  | 81  | WSAGRLRATG NA  | NA |
| 53  | 62  | PKAGRLRAGS NA  | NA |
| 170 | 202 | DIAGRLRAWR NA  | NA |
| 69  | 82  | TSAGRLRAKK NA  | NA |
| 85  | 116 | KNAGRLRAEG NA  | NA |
| 27  | 42  | DNAGRLRAQH NA  | NA |
| 90  | 115 | VQAGRLRAWG NA  | NA |
| 75  | 92  | YAAGRLRASW NA  | NA |
| 21  | 19  | TGSWPLKKNW NA  | NA |
| 36  | 46  | TGSWPLLKPR NA  | NA |
| 36  | 53  | TGSWPLKKPT NA  | NA |
| 60  | 69  | TGSWPLRGKA NA  | NA |
| 72  | 68  | TGSWPLKYRV NA  | NA |
| 48  | 67  | TGSWPLQKPS NA  | NA |
| 44  | 47  | TGSWPLFGGS NA  | NA |
| 84  | 105 | TGSWPLKYGH NA  | NA |
| 51  | 65  | TGSWPLARQG NA  | NA |
| 44  | 61  | TGSWPLHVGT NA  | NA |
| 97  | 129 | TGSWPLWQHR NA  | NA |
| 143 | 163 | TRMALLMYRH NA  | NA |
| 60  | 68  | TRMALLSNRK NA  | NA |
| 83  | 99  | TRMALLFAWH NA  | NA |
| 85  | 83  | CKALDLKRPS NA  | NA |
| 102 | 126 | SQALDLKRLR NA  | NA |
| 28  | 37  | TSALDLKRGR NA  | NA |
| 84  | 84  | WDALDLKRAV NA  | NA |
| 93  | 111 | CMALDLKRMH NA  | NA |
| 102 | 107 | WFALDLKRHG NA  | NA |
| 55  | 63  | RNALDLKRTF NA  | NA |
| 68  | 84  | EFALDLKRWR NA  | NA |
| 45  | 72  | QYALDLKRGG NA  | NA |
| 28  | 74  | CAALDLKRTG NA  | NA |
| 56  | 67  | KWPERLFGGI NA  | NA |
| 43  | 44  | KWPERLWYWV NA  | NA |
| 44  | 75  | KWPERLMATL NA  | NA |

|     |     |               |    |
|-----|-----|---------------|----|
| 12  | 23  | QRVLPLMLET NA | NA |
| 10  | 19  | QRVLPLSSAG NA | NA |
| 18  | 29  | QRVLPLKVKQ NA | NA |
| 19  | 9   | QRVLPLKLNK NA | NA |
| 46  | 53  | QRVLPLHREI NA | NA |
| 24  | 21  | QRVLPLQAGL NA | NA |
| 18  | 20  | QRVLPLQSLG NA | NA |
| 33  | 45  | QRVLPLTNMK NA | NA |
| 105 | 135 | TKPNRLVNHY NA | NA |
| 79  | 109 | FKPNRLVCLI NA | NA |
| 105 | 105 | KKPNRLVYGY NA | NA |
| 56  | 45  | EKPNRLVKNI NA | NA |
| 63  | 79  | SKPNRLVNGY NA | NA |
| 84  | 106 | LKPNRLVMEY NA | NA |
| 42  | 65  | AKPNRLVNSY NA | NA |
| 56  | 78  | PKPNRLVVRI NA | NA |
| 68  | 68  | HKPNRLVRVG NA | NA |
| 2   | 2   | RNVNFLALQQ NA | NA |
| 17  | 24  | RNVNFLLSNR NA | NA |
| 91  | 124 | RNVNFLMKRR NA | NA |
| 52  | 63  | RNVNFLMRIL NA | NA |
| 17  | 12  | RNVNFLHNTG NA | NA |
| 22  | 31  | RNVNFLSGGQ NA | NA |
| 92  | 104 | CWGDRLTKGK NA | NA |
| 49  | 41  | SWGDRLTNTG NA | NA |
| 79  | 84  | SWGDRLTQNG NA | NA |
| 49  | 54  | FWGDRLTVET NA | NA |
| 78  | 76  | MWGDRLTGNG NA | NA |
| 35  | 46  | QWGDRLTVAG NA | NA |
| 92  | 82  | NWGDRLTDMH NA | NA |
| 39  | 44  | IWGDRLTDEY NA | NA |
| 62  | 67  | LWGDRLTNGT NA | NA |
| 39  | 54  | EAVGNLFKAF NA | NA |
| 41  | 53  | EAVGNLHKMG NA | NA |
| 54  | 70  | PFKHLLMGK NA  | NA |
| 43  | 74  | CFKHLLQGT NA  | NA |
| 123 | 135 | LFKHLLAQW NA  | NA |
| 40  | 55  | AFKHLLDLL NA  | NA |
| 83  | 133 | IFKHLLMWT NA  | NA |
| 58  | 98  | GFAKHLLKGW NA | NA |
| 58  | 103 | RFAKHLLRAV NA | NA |



|     |                   |    |
|-----|-------------------|----|
| 61  | 82 QFAKHLLYLI NA  | NA |
| 5   | 8 EFAKHLLML NA    | NA |
| 36  | 37 VFAKHLLLT NA   | NA |
| 102 | 121 YYASHLVAWI NA | NA |
| 46  | 50 YYASHLSDEG NA  | NA |
| 68  | 112 DWVSDLKSKR NA | NA |
| 40  | 49 WPMSDLKSKY NA  | NA |
| 21  | 21 RRFSDLKSKI NA  | NA |
| 43  | 64 RFHSDLKSKR NA  | NA |
| 47  | 51 WKASDLKSKV NA  | NA |
| 65  | 107 KWSNQLLATK NA | NA |
| 29  | 24 GAHNNLVRVR NA  | NA |
| 39  | 63 VSHGNLVRVR NA  | NA |
| 42  | 66 QNVNSLFTHQ NA  | NA |
| 136 | 141 LKVNSLFTMH NA | NA |
| 41  | 45 GNVNSLFTWV NA  | NA |
| 35  | 46 SIVNSLFTGK NA  | NA |
| 19  | 24 PQVNSLFTQG NA  | NA |
| 41  | 57 WKVNSLFTPH NA  | NA |
| 29  | 34 HYVNSLFTAG NA  | NA |
| 34  | 35 KHVNSLFTLG NA  | NA |
| 38  | 38 NNVNSLFTGI NA  | NA |
| 12  | 22 PAVNSLFTMV NA  | NA |
| 20  | 17 TSVNSLFTPR NA  | NA |
| 85  | 89 SWGKRLKWNL NA  | NA |
| 25  | 28 IPYNRLKWNL NA  | NA |
| 66  | 68 NHFGRLKWNL NA  | NA |
| 24  | 51 CRILRLKWNL NA  | NA |
| 50  | 75 LWGWRLKWNL NA  | NA |
| 66  | 80 CQSQRKWNL NA   | NA |
| 63  | 68 FRVEPLVAVK NA  | NA |
| 117 | 182 FRVEPLYNRW NA | NA |
| 56  | 72 FRVEPLYRSQ NA  | NA |
| 64  | 63 FRVEPLVLEW NA  | NA |
| 42  | 56 FRVEPLYGQL NA  | NA |
| 42  | 47 FRVEPLSSIIY NA | NA |
| 40  | 54 FRVEPLTRKT NA  | NA |
| 44  | 46 FRVEPLYGSV NA  | NA |
| 53  | 58 YSALPMTMGG NA  | NA |
| 27  | 45 SAAERLVMTY NA  | NA |
| 60  | 55 RQGARLVMTY NA  | NA |

|     |     |                   |    |
|-----|-----|-------------------|----|
| 37  | 54  | HTPGRLVMTY NA     | NA |
| 69  | 68  | FHVKRLVMTY NA     | NA |
| 38  | 45  | RHINRLVMTY NA     | NA |
| 69  | 74  | CWGGRLVMTY NA     | NA |
| 29  | 41  | GVSARLVMMML NA    | NA |
| 79  | 71  | IVSARLVNMG NA     | NA |
| 59  | 75  | CVSARLVNTI NA     | NA |
| 29  | 34  | KVSARLVSVL NA     | NA |
| 97  | 106 | QVSARLVRTW NA     | NA |
| 26  | 23  | VVSARLV D I I NA  | NA |
| 15  | 19  | GVSARLVSSA NA     | NA |
| 80  | 94  | CVSARLVMGK NA     | NA |
| 54  | 69  | ESPLDLKMGW NA     | NA |
| 45  | 46  | QSPLDLKSWQ NA     | NA |
| 73  | 101 | MSPLDLKVWK NA     | NA |
| 36  | 36  | TSPLDLKVTH NA     | NA |
| 32  | 46  | NSPLDLKDER NA     | NA |
| 30  | 34  | LSPLDLKGT F NA    | NA |
| 53  | 52  | YSPLDLKVEQ NA     | NA |
| 63  | 57  | PSPLDLKV V V NA   | NA |
| 25  | 36  | NSPLDLKSMR NA     | NA |
| 51  | 59  | TSPLDLKLSG NA     | NA |
| 46  | 37  | CPAGHLSGQ G NA    | NA |
| 126 | 143 | RPAGHLSMSW NA     | NA |
| 45  | 59  | GPAGHLSV K I NA   | NA |
| 53  | 100 | CPAGHLSV P F NA   | NA |
| 47  | 45  | NPAGHLSNG F NA    | NA |
| 39  | 44  | SPAGHLS S M G NA  | NA |
| 97  | 130 | HPAGHLS D H H NA  | NA |
| 35  | 43  | TPAGHLS D E H NA  | NA |
| 51  | 76  | KPAGHLS D G H NA  | NA |
| 69  | 48  | NPAGHLS R V Q NA  | NA |
| 67  | 70  | GPAGHLS M V R NA  | NA |
| 36  | 42  | ARVGVLV G Q I NA  | NA |
| 53  | 46  | ARVGVLH L G A NA  | NA |
| 41  | 56  | ARVGVLV G G Y NA  | NA |
| 47  | 38  | ARVGVL M N L L NA | NA |
| 38  | 55  | VSVDQLV G A K NA  | NA |
| 26  | 41  | VSVDQLT A N A NA  | NA |
| 33  | 45  | VSVDQLS A Q I NA  | NA |
| 43  | 57  | VSVDQLT M S W NA  | NA |

|    |     |               |    |
|----|-----|---------------|----|
| 35 | 25  | VSVDQLWDKG NA | NA |
| 68 | 88  | VSVDQLWGAR NA | NA |
| 34 | 22  | VSVDQLTNVS NA | NA |
| 31 | 23  | VSVDQLLLVA NA | NA |
| 30 | 44  | VSVDQLRATF NA | NA |
| 43 | 66  | VSVDQLQYNQ NA | NA |
| 35 | 40  | VSVDQLTQTR NA | NA |
| 9  | 17  | SPALDMKDHG NA | NA |
| 43 | 54  | SPALDMKVLL NA | NA |
| 18 | 41  | SPALDMAVMS NA | NA |
| 39 | 68  | SPALDMVGRK NA | NA |
| 73 | 86  | IDFGRLMYER NA | NA |
| 26 | 36  | ATMQRLMYER NA | NA |
| 55 | 72  | SDANRLMYER NA | NA |
| 11 | 35  | VAISRLFQLT NA | NA |
| 39 | 61  | SNVWDLKRST NA | NA |
| 62 | 61  | EPGWDLKRSV NA | NA |
| 95 | 119 | MTAWDLKRSR NA | NA |
| 87 | 114 | EPFWDLKRSW NA | NA |
| 52 | 77  | CTGWDLKRSY NA | NA |
| 81 | 75  | GNSWDLKRSA NA | NA |
| 41 | 37  | KKIWDLKRSG NA | NA |
| 80 | 80  | VPPWDLKRSR NA | NA |
| 44 | 52  | GTGGQLRREY NA | NA |
| 53 | 79  | CPMLQLRREY NA | NA |
| 40 | 46  | QISMQLRREY NA | NA |
| 65 | 91  | HNMWQLRREY NA | NA |
| 18 | 26  | DAPDQLSSNG NA | NA |
| 7  | 17  | DAPDQLSKLK NA | NA |
| 51 | 78  | IAPDQLSGIL NA | NA |
| 19 | 20  | GAPDQLSVQH NA | NA |
| 31 | 40  | LAPDQLSVVK NA | NA |
| 26 | 36  | QAPDQLSDWW NA | NA |
| 23 | 32  | VAPDQLSSNI NA | NA |
| 14 | 20  | RAPDQLSAGK NA | NA |
| 33 | 38  | FAPDQLSNSW NA | NA |
| 20 | 18  | WAPDQLSKLI NA | NA |
| 25 | 35  | VAPDQLSAIG NA | NA |
| 19 | 13  | GAHKFLVAKA NA | NA |
| 42 | 45  | LWHKFLVAKA NA | NA |
| 29 | 45  | TDPGFLVAKA NA | NA |

|     |                    |    |
|-----|--------------------|----|
| 66  | 83 RRPLRIAVGR NA   | NA |
| 39  | 34 RRPLRIAQNH NA   | NA |
| 37  | 50 RRPLRISYPV NA   | NA |
| 20  | 22 RRPLRIASQK NA   | NA |
| 155 | 172 DLPHCLSGHA NA  | NA |
| 114 | 133 DLPHCLHDNG NA  | NA |
| 14  | 21 FPVNRISLSG NA   | NA |
| 25  | 35 VTVNRISLPV NA   | NA |
| 19  | 17 DDVNRISLNG NA   | NA |
| 19  | 33 GYVNRISLEI NA   | NA |
| 44  | 46 LWVNRISLVV NA   | NA |
| 42  | 49 GFVNRISLKQ NA   | NA |
| 31  | 33 EHVNRISLLF NA   | NA |
| 49  | 41 VAVNRISLMA NA   | NA |
| 46  | 80 CKVNRISLVF NA   | NA |
| 44  | 48 HHVNRISLGG NA   | NA |
| 6   | 7 ESGNSLTFNT NA    | NA |
| 49  | 76 VNHWRRLTVGF NA  | NA |
| 82  | 83 VNHWRRLTVGW NA  | NA |
| 25  | 40 VIMWRRLTVGT NA  | NA |
| 54  | 65 DRVWRRLTVGF NA  | NA |
| 72  | 67 NHVWRRLTVGH NA  | NA |
| 60  | 79 PDSWRRLTVGK NA  | NA |
| 85  | 89 CKIWRLTVGL NA   | NA |
| 62  | 58 KNFWRLTVGL NA   | NA |
| 164 | 240 MSAWRRLTVGA NA | NA |
| 41  | 31 VYSAYLVQAF NA   | NA |
| 28  | 33 VYSAYLMVEF NA   | NA |
| 113 | 135 VYSAYLHNWG NA  | NA |
| 48  | 56 YAVHQLFNVG NA   | NA |
| 31  | 30 VTHIQLFNVG NA   | NA |
| 52  | 64 VMFAQLFNVG NA   | NA |
| 52  | 60 KPFKQLFNVG NA   | NA |
| 45  | 43 MDHGQLFNVG NA   | NA |
| 38  | 46 VDPKQLFNVG NA   | NA |
| 42  | 57 GQPNFLVDHF NA   | NA |
| 35  | 22 GQPNFLMDNF NA   | NA |
| 62  | 79 GQPNFLMSHA NA   | NA |
| 30  | 25 GQPNFLQSVL NA   | NA |
| 78  | 86 PTLWRIRMG I NA  | NA |
| 144 | 151 PTLWRIVGHW NA  | NA |

|     |     |               |    |
|-----|-----|---------------|----|
| 98  | 134 | PTLWRIQNWW NA | NA |
| 67  | 72  | PTLWRIVRGV NA | NA |
| 54  | 80  | PTLWRIVQHL NA | NA |
| 51  | 73  | PTLWRIKSKG NA | NA |
| 45  | 60  | PTLWRIYGKT NA | NA |
| 80  | 108 | PTLWRIAART NA | NA |
| 85  | 121 | PTLWRIRVGW NA | NA |
| 67  | 67  | PTLWRIVQWK NA | NA |
| 213 | 233 | YHHGSLSVWK NA | NA |
| 57  | 88  | QWHNSLSVWK NA | NA |
| 70  | 102 | GHAHSLSVWK NA | NA |
| 89  | 105 | LHMKSLSVWK NA | NA |
| 27  | 43  | TWAKMLMMGG NA | NA |
| 50  | 57  | TWAKMLLNRS NA | NA |
| 45  | 52  | TWAKMLKNIG NA | NA |
| 43  | 36  | TWAKMLMASW NA | NA |
| 31  | 41  | TWAKMLVLPR NA | NA |
| 49  | 55  | TWAKMLQDHS NA | NA |
| 106 | 116 | TWAKMLYDIH NA | NA |
| 52  | 48  | TWAKMLLGPW NA | NA |
| 26  | 27  | TWAKMLYKIG NA | NA |
| 29  | 31  | PPAQDLYLMW NA | NA |
| 41  | 37  | APAQDLYSHV NA | NA |
| 35  | 52  | MPAQDLYKAF NA | NA |
| 51  | 54  | IPAQDLYMRI NA | NA |
| 25  | 22  | TPAQDLYMVK NA | NA |
| 47  | 34  | KPAQDLYQQF NA | NA |
| 60  | 43  | DPAQDLYRGV NA | NA |
| 54  | 80  | QPAQDLYRRQ NA | NA |
| 23  | 32  | RPAQDLYQET NA | NA |
| 40  | 46  | IPAQDLYGLT NA | NA |
| 324 | 482 | TVINQLRRRW NA | NA |
| 33  | 37  | CVINQLRQIG NA | NA |
| 63  | 74  | MVINQLRGQT NA | NA |
| 51  | 79  | VVINQLRKHF NA | NA |
| 33  | 48  | RVINQLRVGY NA | NA |
| 52  | 58  | EVINQLRAVV NA | NA |
| 79  | 80  | NVINQLRSKQ NA | NA |
| 101 | 136 | MVINQLRQRK NA | NA |
| 23  | 27  | AVINQLRVAH NA | NA |
| 28  | 36  | LVINQLRMHT NA | NA |

|     |                   |    |
|-----|-------------------|----|
| 47  | 50 YVINQLRQIG NA  | NA |
| 84  | 82 VMVWPLVKRK NA  | NA |
| 51  | 75 HKVWPLVKAT NA  | NA |
| 93  | 91 LYVWPLVKMK NA  | NA |
| 44  | 50 IRVWPLVKSK NA  | NA |
| 40  | 47 CRVWPLVKKG NA  | NA |
| 68  | 72 AIVWPLVKKA NA  | NA |
| 15  | 29 LRVWPLVKKG NA  | NA |
| 42  | 46 NTVWPLVKGA NA  | NA |
| 53  | 58 FNVWPLVKQG NA  | NA |
| 198 | 259 CQINPLRARL NA | NA |
| 162 | 210 IDSNPLRARL NA | NA |
| 23  | 29 TTSASLTMMG NA  | NA |
| 33  | 32 TTSASLSGHG NA  | NA |
| 25  | 39 TTSASLTVEG NA  | NA |
| 23  | 28 TTSASLTRPS NA  | NA |
| 10  | 22 TTSASLFKSA NA  | NA |
| 40  | 37 TTSASLSLGI NA  | NA |
| 18  | 19 WNSLNLFDQY NA  | NA |
| 13  | 15 WNSLNLSSGG NA  | NA |
| 48  | 66 FRASRLVQAI NA  | NA |
| 64  | 66 KRASRLVNAS NA  | NA |
| 6   | 9 QRASRLVKKY NA   | NA |
| 17  | 26 IRASRLVKIK NA  | NA |
| 103 | 117 MRASRLVYAL NA | NA |
| 93  | 109 NRASRLVGNF NA | NA |
| 61  | 63 IRASRLVMSL NA  | NA |
| 40  | 32 VRASRLVLNS NA  | NA |
| 35  | 37 SRASRLVKHY NA  | NA |
| 50  | 43 YRASRLVAEI NA  | NA |
| 80  | 94 GRASRLVMEH NA  | NA |
| 201 | 231 ASHGSLNQRL NA | NA |
| 130 | 124 HPSHRLMMGY NA | NA |
| 53  | 68 NWHHRLMMGG NA  | NA |
| 70  | 124 HQHLPLHQTK NA | NA |
| 44  | 52 DAAWPLHQTK NA  | NA |
| 78  | 73 EHIQPLHQTK NA  | NA |
| 32  | 54 NMGGPLHQTK NA  | NA |
| 38  | 35 EPFNPLHQTK NA  | NA |
| 77  | 69 TVSLPLVAHV NA  | NA |
| 27  | 31 TVSLPLFYVG NA  | NA |

|     |     |                 |    |
|-----|-----|-----------------|----|
| 66  | 87  | TVSLPLHVTA NA   | NA |
| 43  | 43  | TVSLPLQLNY NA   | NA |
| 12  | 9   | TVSLPLASRG NA   | NA |
| 62  | 71  | TVSLPLKGAL NA   | NA |
| 139 | 178 | CRMNRLRLAI NA   | NA |
| 131 | 141 | TYPWRLRLAI NA   | NA |
| 59  | 80  | KSGERLRLAI NA   | NA |
| 25  | 26  | FDTWRLMLIR NA   | NA |
| 77  | 85  | RMTWRLMLHW NA   | NA |
| 62  | 83  | SNTWRLMLRG NA   | NA |
| 89  | 98  | PSTWRLMLGI NA   | NA |
| 125 | 127 | HKTWRLMLPS NA   | NA |
| 37  | 60  | RWTWRLMLVH NA   | NA |
| 35  | 44  | GTTWRLMLNG NA   | NA |
| 34  | 53  | KMTWRLMLGA NA   | NA |
| 38  | 35  | CPTWRLMLNT NA   | NA |
| 50  | 63  | YMTWRLMLPA NA   | NA |
| 90  | 121 | TTSLRLMLAW NA   | NA |
| 59  | 83  | TTSLRLTGVG NA   | NA |
| 215 | 329 | TTSLRLRDGL NA   | NA |
| 92  | 118 | TTSLRLYMIA NA   | NA |
| 123 | 158 | TTSLRLFMGT NA   | NA |
| 89  | 105 | TTSLRLHYTL NA   | NA |
| 41  | 44  | TTSLRLQRMS NA   | NA |
| 83  | 119 | TTSLRLMANK NA   | NA |
| 112 | 109 | TTSLRLSKGA NA   | NA |
| 92  | 110 | TTSLRLFMHI NA   | NA |
| 115 | 132 | TTSLRLRLHI NA   | NA |
| 28  | 28  | RGVWKLYDGI NA   | NA |
| 37  | 46  | RGVWKLQLNG NA   | NA |
| 24  | 44  | RGVWKL FVGR NA  | NA |
| 36  | 36  | RGVWKL MYGV NA  | NA |
| 32  | 52  | RGVWKL FKS W NA | NA |
| 38  | 45  | RGVWKL MNRF NA  | NA |
| 68  | 97  | RGVWKL YLHF NA  | NA |
| 31  | 42  | RGVWKL QLSI NA  | NA |
| 15  | 24  | HKIAL LISWH NA  | NA |
| 49  | 58  | HKIAL LIVQF NA  | NA |
| 121 | 128 | HKIAL LRRVS NA  | NA |
| 138 | 117 | HKIAL LSGRR NA  | NA |
| 73  | 102 | HKIAL LH YEG NA | NA |

|     |                   |    |
|-----|-------------------|----|
| 79  | 93 HKIALLVVRH NA  | NA |
| 10  | 14 NSPMSLVSRG NA  | NA |
| 20  | 29 RAPLPVLLVY NA  | NA |
| 18  | 12 RAPLPVLNIY NA  | NA |
| 34  | 43 ERPFFLANNL NA  | NA |
| 5   | 10 ERPFFLAGPI NA  | NA |
| 42  | 75 ERPFFLKQTK NA  | NA |
| 36  | 27 ERPFFLSQWR NA  | NA |
| 72  | 81 ERPFFLRLNQ NA  | NA |
| 15  | 13 ERPFFLSRIF NA  | NA |
| 33  | 33 ERPFFLLQNL NA  | NA |
| 125 | 161 HVVAQLWQHI NA | NA |
| 67  | 84 HVVAQLWKQA NA  | NA |
| 24  | 40 HVVAQLAGTG NA  | NA |
| 65  | 60 HVVAQLLSGQ NA  | NA |
| 35  | 41 HVVAQLISKY NA  | NA |
| 56  | 77 HVVAQLLVTL NA  | NA |
| 8   | 11 FAPAEVVMKY NA  | NA |
| 11  | 3 FAPAEVAVSY NA   | NA |
| 26  | 38 FAPAEVQ NHL NA | NA |
| 7   | 15 FAPAEVVYGG NA  | NA |
| 4   | 11 FAPAEVQDKY NA  | NA |
| 47  | 55 QMPLQIKGQT NA  | NA |
| 80  | 91 QMPLQIRLQF NA  | NA |
| 47  | 69 QMPLQIASGQ NA  | NA |
| 70  | 88 QMPLQIIVNF NA  | NA |
| 69  | 92 QMPLQIKQLK NA  | NA |
| 52  | 63 YHPISLTRNV NA  | NA |
| 50  | 61 CYPASLLNGQ NA  | NA |
| 28  | 26 PYPASLLNGL NA  | NA |
| 15  | 10 FPPASLLNTK NA  | NA |
| 33  | 33 ANPASLLNGK NA  | NA |
| 31  | 37 PWPASLLNQA NA  | NA |
| 21  | 27 RIPASLLNGG NA  | NA |
| 14  | 15 LKPASLLNPI NA  | NA |
| 29  | 40 RYPASLLNHL NA  | NA |
| 18  | 8 PSPASLLNPG NA   | NA |
| 33  | 50 MWVLSLVKWA NA  | NA |
| 12  | 15 MWVLSLIVVG NA  | NA |
| 24  | 43 QRVAADVQPT NA  | NA |
| 54  | 53 TDIGEIVDVQ NA  | NA |



|     |     |                |    |
|-----|-----|----------------|----|
| 10  | 24  | TDIGEIWVTS NA  | NA |
| 23  | 39  | VGPAFLFNAY NA  | NA |
| 74  | 86  | VGPAFLIYHS NA  | NA |
| 12  | 9   | VGPAFLMGVG NA  | NA |
| 36  | 55  | VGPAFLTMHV NA  | NA |
| 11  | 16  | VGPAFLLEKEW NA | NA |
| 21  | 15  | VGPAFLHMAG NA  | NA |
| 20  | 31  | VGPAFLSSQG NA  | NA |
| 40  | 63  | VGPAFLRDTW NA  | NA |
| 20  | 31  | VGPAFLHMWS NA  | NA |
| 44  | 42  | NSPLPFIGGK NA  | NA |
| 43  | 69  | FSPLPFIYGY NA  | NA |
| 49  | 52  | WSPLPFIMVF NA  | NA |
| 37  | 32  | ISPLPFIDWT NA  | NA |
| 27  | 28  | GSPLPFINQA NA  | NA |
| 42  | 60  | LSPLPFIKPR NA  | NA |
| 52  | 69  | WSPLPFIVGK NA  | NA |
| 38  | 26  | GSPLPFINWQ NA  | NA |
| 36  | 44  | TSPLPFIYQA NA  | NA |
| 35  | 34  | RSPLPFIDMF NA  | NA |
| 43  | 64  | QEPLFLRYTK NA  | NA |
| 33  | 48  | REPLFLRDPL NA  | NA |
| 39  | 42  | IEPLFLRGAY NA  | NA |
| 57  | 57  | KEPLFLRNLF NA  | NA |
| 55  | 55  | NEPLFLRLQI NA  | NA |
| 57  | 73  | DEPLFLRGHT NA  | NA |
| 53  | 53  | YEPLFLRMRS NA  | NA |
| 40  | 60  | QEPLFLRKHF NA  | NA |
| 119 | 111 | IEPLFLRRTL NA  | NA |
| 64  | 52  | TEPLFLRMPH NA  | NA |
| 36  | 43  | GEPLFLRKNH NA  | NA |
| 34  | 40  | TFVFELRLRF NA  | NA |
| 30  | 43  | GFVFELRKIV NA  | NA |
| 13  | 13  | FFVFELRAWV NA  | NA |
| 44  | 74  | HFVFELRMHS NA  | NA |
| 45  | 66  | AFVFELRRNG NA  | NA |
| 66  | 87  | YFVFELRGMS NA  | NA |
| 171 | 239 | RFVFELRYGK NA  | NA |
| 51  | 50  | LFVFELRGGK NA  | NA |
| 36  | 35  | IFVFELRYRI NA  | NA |
| 11  | 11  | SFVFELRSSY NA  | NA |

|     |     |                |    |
|-----|-----|----------------|----|
| 195 | 237 | HFVFELRSAV NA  | NA |
| 107 | 132 | KRVYLLKVEK NA  | NA |
| 26  | 47  | KRVYLLRMET NA  | NA |
| 84  | 93  | KRVYLLKNHV NA  | NA |
| 46  | 59  | KRVYLLARNI NA  | NA |
| 44  | 48  | SLPLLLRYRG NA  | NA |
| 31  | 46  | SLPLLLIKHK NA  | NA |
| 30  | 34  | QPPHAFYNQG NA  | NA |
| 34  | 41  | QPPHAFVYRK NA  | NA |
| 48  | 39  | QPPHAFLMPY NA  | NA |
| 32  | 37  | QPPHAFFGEG NA  | NA |
| 55  | 54  | QPPHAFYVIH NA  | NA |
| 44  | 38  | QPPHAFRKGQ NA  | NA |
| 12  | 13  | QPPHAFANLH NA  | NA |
| 54  | 83  | QPPHAFKAQH NA  | NA |
| 44  | 50  | QPPHAFKQOI NA  | NA |
| 29  | 30  | ELPAALTDGH NA  | NA |
| 40  | 45  | CLPAALTVEV NA  | NA |
| 31  | 32  | LLPAALTLGF NA  | NA |
| 33  | 52  | FLPAALTQNQ NA  | NA |
| 36  | 48  | GLPAALTDLG NA  | NA |
| 27  | 25  | MLPAALTA AV NA | NA |
| 23  | 28  | TLPAALTQGY NA  | NA |
| 89  | 120 | SLPAALTLWV NA  | NA |
| 33  | 37  | CLPAALTGSA NA  | NA |
| 56  | 61  | FDVWMLRSHG NA  | NA |
| 29  | 57  | FDVWMLRGGH NA  | NA |
| 13  | 14  | FDVWMLIYGI NA  | NA |
| 54  | 52  | FDVWMLAMSG NA  | NA |
| 43  | 42  | SQPMAYIGAQ NA  | NA |
| 62  | 69  | YMPLLLRAQF NA  | NA |
| 39  | 46  | TMPLLLRQMA NA  | NA |
| 15  | 15  | AMPLLLRYWI NA  | NA |
| 60  | 56  | EMPLLLRQMR NA  | NA |
| 99  | 111 | WMPLLLRGVK NA  | NA |
| 70  | 69  | VMPLLLRVHH NA  | NA |
| 44  | 87  | YMPLLLRQII NA  | NA |
| 73  | 108 | HMPLLLRVNV NA  | NA |
| 60  | 69  | DMPLLLRNLT NA  | NA |
| 56  | 50  | IMPLLLRVGV NA  | NA |
| 40  | 42  | PMPLLLRGSY NA  | NA |

|     |     |               |    |
|-----|-----|---------------|----|
| 108 | 92  | TVPWSVFMWR NA | NA |
| 46  | 60  | TVPWSVSRIW NA | NA |
| 42  | 43  | TVPWSVLGGA NA | NA |
| 39  | 52  | TVPWSVLKIQ NA | NA |
| 46  | 54  | TVPWSVRKII NA | NA |
| 12  | 13  | WRPFSYVQKR NA | NA |
| 16  | 21  | WRPFSYIGMG NA | NA |
| 8   | 6   | WRPFSYRKKG NA | NA |
| 19  | 21  | WRPFSYANRV NA | NA |
| 12  | 9   | WRPFSYVGKA NA | NA |
| 24  | 14  | NGPYNLIMSF NA | NA |
| 92  | 117 | RHPFSNRANW NA | NA |
| 27  | 38  | GMPFSNRAMY NA | NA |
| 82  | 83  | PYPFSNRALI NA | NA |
| 37  | 47  | GAPFSNRAMV NA | NA |
| 16  | 24  | FPPFSNRAQG NA | NA |
| 38  | 47  | LIPFSNRAMR NA | NA |
| 58  | 67  | APPFSNRAKW NA | NA |
| 91  | 122 | YNPFSNRALH NA | NA |
| 55  | 43  | IQPFSNRAQK NA | NA |
| 39  | 43  | TKPFSNRARG NA | NA |
| 63  | 63  | DSPLSLAMNL NA | NA |
| 38  | 42  | DSPLSLARMA NA | NA |
| 13  | 13  | DSPLSLAQPR NA | NA |
| 28  | 31  | DSPLSLAGAG NA | NA |
| 59  | 78  | KFPWNYIDRG NA | NA |
| 55  | 58  | KFPWNYIAWI NA | NA |
| 65  | 72  | KFPWNYIVMA NA | NA |
| 36  | 36  | RQPFLLTRLV NA | NA |
| 34  | 45  | RQPFLLANEF NA | NA |
| 23  | 16  | RQPFLVSQL NA  | NA |
| 70  | 93  | ILVWNYIDKL NA | NA |
| 83  | 90  | SSPLALVQLW NA | NA |
| 32  | 34  | SSPLALVNTG NA | NA |
| 25  | 21  | SSPLALIYWA NA | NA |
| 33  | 35  | SSPLALIVWI NA | NA |
| 39  | 75  | SSPLALRYIL NA | NA |
| 46  | 62  | KFPASLTGAL NA | NA |
| 56  | 48  | KFPASLHYEG NA | NA |
| 56  | 50  | KFPASLRAEV NA | NA |
| 36  | 35  | KFPASLADLA NA | NA |

|     |                   |    |
|-----|-------------------|----|
| 49  | 47 RLPYPLIYAF NA  | NA |
| 125 | 135 RLPYPLKMHR NA | NA |
| 32  | 57 RLPYPLVQHG NA  | NA |
| 33  | 56 YTPWAITGIL NA  | NA |
| 43  | 41 MQPWAITGGY NA  | NA |
| 57  | 51 FIPWAITGSK NA  | NA |
| 15  | 30 WFPWAITGLG NA  | NA |
| 63  | 58 AWPWAITGLH NA  | NA |
| 46  | 50 PWPWAITGPQ NA  | NA |
| 8   | 11 YAPWAITGNQ NA  | NA |
| 53  | 61 RNPWAITGNK NA  | NA |
| 43  | 55 PNPWAITGRR NA  | NA |
| 22  | 39 IDPWAITGEA NA  | NA |
| 38  | 36 FIPFPFAGIT NA  | NA |
| 54  | 70 FIPFPFAMML NA  | NA |
| 62  | 63 FIPFPFTGTA NA  | NA |
| 58  | 54 TVPYQLRDHV NA  | NA |
| 36  | 35 TVPYQLSDAG NA  | NA |
| 41  | 74 TVPYQLRDGI NA  | NA |
| 31  | 51 TVPYQLSAVG NA  | NA |
| 35  | 32 TVPYQLLQGF NA  | NA |
| 27  | 25 TVPYQLSMAG NA  | NA |
| 55  | 62 IGALALIAGI NA  | NA |
| 8   | 16 RAPASLHRKF NA  | NA |
| 9   | 13 RAPASLLYGG NA  | NA |
| 19  | 15 RAPASLWNGG NA  | NA |
| 14  | 24 RAPASLRYQQ NA  | NA |
| 17  | 16 RAPASLTAGY NA  | NA |
| 27  | 37 REPLTLKDMY NA  | NA |
| 57  | 60 REPLTLAQKL NA  | NA |
| 29  | 43 REPLTLALEH NA  | NA |
| 19  | 29 REPLTLTLGF NA  | NA |
| 37  | 40 REPLTLKRPW NA  | NA |
| 16  | 35 KSPVFLIVNK NA  | NA |
| 27  | 50 HAPLNFIGRQ NA  | NA |
| 32  | 46 HAPLNFAQKT NA  | NA |
| 75  | 78 VDVWNLIMHH NA  | NA |
| 30  | 38 RYVWNLIMPS NA  | NA |
| 31  | 38 CIVWNLIMQF NA  | NA |
| 36  | 35 EQVWNLIMGR NA  | NA |
| 37  | 51 PHVWNLIMMV NA  | NA |

|     |                   |    |
|-----|-------------------|----|
| 43  | 50 FNVWNLIMTL NA  | NA |
| 68  | 94 YQVWNLIMMK NA  | NA |
| 32  | 51 KNVWNLIMAS NA  | NA |
| 71  | 93 TQVWNLIMKG NA  | NA |
| 51  | 61 WQVWNLIMEQ NA  | NA |
| 32  | 39 AHVWNLIMPG NA  | NA |
| 37  | 46 QGPWHIISGG NA  | NA |
| 70  | 69 QGPWHIVQTH NA  | NA |
| 33  | 28 QGPWHIYEL NA   | NA |
| 40  | 57 IGPQFLMYKT NA  | NA |
| 10  | 21 IGPQFLINIS NA  | NA |
| 33  | 39 IGPQFLTAIQ NA  | NA |
| 8   | 10 IGPQFLIMKG NA  | NA |
| 31  | 34 IGPQFLYVPI NA  | NA |
| 17  | 21 IGPQFLWNMI NA  | NA |
| 12  | 9 IGPQFLYKGF NA   | NA |
| 43  | 41 IGPQFLKGP NA   | NA |
| 26  | 47 IGPQFLKDRL NA  | NA |
| 69  | 79 GFPAALLGAL NA  | NA |
| 14  | 21 RSPAALLGKT NA  | NA |
| 48  | 55 SFPAALLGIT NA  | NA |
| 92  | 101 KKPAALLGWL NA | NA |
| 14  | 6 EAPAALLGLG NA   | NA |
| 53  | 82 LIPAALLGIV NA  | NA |
| 25  | 22 QFPAALLGKF NA  | NA |
| 75  | 85 IRPAALLGWL NA  | NA |
| 37  | 56 CQPAALLGEA NA  | NA |
| 55  | 60 TRPAALLGQL NA  | NA |
| 51  | 78 RLPVAIVVWA NA  | NA |
| 109 | 111 RLPVAIIVLW NA | NA |
| 51  | 58 RLPVAIAVQQ NA  | NA |
| 47  | 71 RLPVAIIKAK NA  | NA |
| 21  | 56 GFPLMLRGPW NA  | NA |
| 45  | 61 GFPLMLRYQT NA  | NA |
| 15  | 27 GFPLMLIAHS NA  | NA |
| 49  | 62 GFPLMLRRIQ NA  | NA |
| 71  | 64 VKPWALIYAY NA  | NA |
| 43  | 54 VKPWALIGML NA  | NA |
| 29  | 34 VKPWALRNSF NA  | NA |
| 161 | 209 VKPWALSQGW NA | NA |
| 60  | 91 VKPWALSNEA NA  | NA |

|     |                    |    |
|-----|--------------------|----|
| 74  | 81 VKPWALKVRK NA   | NA |
| 58  | 74 VKPWALKSPW NA   | NA |
| 60  | 98 VKPWALVDTH NA   | NA |
| 79  | 101 VKPWALVAIK NA  | NA |
| 11  | 19 ERVWAI FMQR NA  | NA |
| 40  | 47 ERVWAIRDPI NA   | NA |
| 34  | 33 ERVWAI FQMQ NA  | NA |
| 72  | 91 ERVWAIHG SV NA  | NA |
| 40  | 49 ERVWAIIMAS NA   | NA |
| 28  | 28 ERVWAI VANI NA  | NA |
| 54  | 75 ERVWAILRWQ NA   | NA |
| 68  | 110 ERVWAI IQAR NA | NA |
| 82  | 93 HFPLMYADWW NA   | NA |
| 104 | 139 KFPLMYARHK NA  | NA |
| 30  | 33 TFPLMYAGQT NA   | NA |
| 12  | 14 TFPLMYALLH NA   | NA |
| 45  | 33 YFPLMYAVQG NA   | NA |
| 46  | 63 VFPLMYARSH NA   | NA |
| 118 | 176 AFPLMYARRV NA  | NA |
| 49  | 62 TFPLMYAVTQ NA   | NA |
| 53  | 54 SFPLMYAMGH NA   | NA |
| 39  | 53 FFPLMYAMPY NA   | NA |
| 93  | 124 WFPLMYARQV NA  | NA |
| 38  | 42 RPPLAFANLT NA   | NA |
| 40  | 34 RPPLAFTMSV NA   | NA |
| 56  | 72 RPPLAFINWT NA   | NA |
| 46  | 66 RPPLAFRRTQ NA   | NA |
| 42  | 54 ACIWSLTGKG NA   | NA |
| 60  | 43 ACIWSLRKEY NA   | NA |
| 95  | 131 ACIWSLHYMR NA  | NA |
| 25  | 38 ACIWSLYYSS NA   | NA |
| 33  | 39 ACIWSLIKWW NA   | NA |
| 38  | 47 ACIWSLAGGI NA   | NA |
| 74  | 67 ACIWSLTRQY NA   | NA |
| 45  | 39 ACIWSLFRVG NA   | NA |
| 68  | 87 ACIWSLVSQR NA   | NA |
| 51  | 69 ACIWSLAKGQ NA   | NA |
| 39  | 45 SDPYSLRLNS NA   | NA |
| 37  | 29 TDPYSLRKTQ NA   | NA |
| 136 | 174 ADPYSLRARL NA  | NA |
| 82  | 90 MDPYSLRQAA NA   | NA |

|     |     |               |    |
|-----|-----|---------------|----|
| 51  | 57  | TDPYSLRNVS NA | NA |
| 77  | 74  | FDPYSLRKGT NA | NA |
| 51  | 48  | GDPYSLRKHR NA | NA |
| 151 | 189 | WDPYSLRLWW NA | NA |
| 104 | 136 | FDPYSLRGHV NA | NA |
| 52  | 48  | YDPYSLRDPG NA | NA |
| 105 | 135 | VFPMSLALTQ NA | NA |
| 62  | 53  | VFPMSLVRRG NA | NA |
| 34  | 52  | VFPMSLISIK NA | NA |
| 19  | 30  | RLPWSLLKPR NA | NA |
| 52  | 56  | RLPWSLAVVR NA | NA |
| 67  | 93  | RLPWSLVRRF NA | NA |
| 86  | 88  | RLPWSLAGGK NA | NA |
| 62  | 90  | RLPWSLIRVS NA | NA |
| 41  | 52  | TFPFMLVMTR NA | NA |
| 49  | 61  | TFPFMLVRVS NA | NA |
| 49  | 55  | TFPFMLKDVH NA | NA |
| 28  | 41  | TFPFMLAKEF NA | NA |
| 44  | 79  | LSPASLRRIF NA | NA |
| 24  | 29  | WSPASLRDPL NA | NA |
| 56  | 45  | KSPASLRQMY NA | NA |
| 30  | 43  | NSPASLRYIR NA | NA |
| 92  | 88  | GSPASLRRMY NA | NA |
| 33  | 48  | HSPASLRKNY NA | NA |
| 17  | 24  | YSPASLRAPG NA | NA |
| 32  | 30  | RSPASLRKEV NA | NA |
| 56  | 60  | YSPASLRNHV NA | NA |
| 33  | 38  | GSPASLRLLR NA | NA |
| 40  | 31  | CSPASLRATR NA | NA |
| 53  | 98  | CWIWALRVRG NA | NA |
| 30  | 33  | TVPQMIKLKY NA | NA |
| 45  | 31  | TVPQMIIDGF NA | NA |
| 32  | 40  | TVPQMITSVT NA | NA |
| 27  | 35  | TVPQMIAGPI NA | NA |
| 11  | 21  | TVPQMIKDKG NA | NA |
| 31  | 41  | TVPQMIIGGF NA | NA |
| 39  | 30  | TVPQMIAVST NA | NA |
| 32  | 29  | TVVAYIVRQG NA | NA |
| 28  | 32  | TVVAYIVGMT NA | NA |
| 39  | 53  | SEPFGLIDWT NA | NA |
| 21  | 24  | RIPASLAYLY NA | NA |

|    |     |               |    |
|----|-----|---------------|----|
| 28 | 45  | RIPASLIQVV NA | NA |
| 19 | 22  | RIPASLLKAI NA | NA |
| 25 | 29  | RIPASLLMVT NA | NA |
| 10 | 10  | RIPASLTLQQ NA | NA |
| 88 | 101 | LNPAFLRQWL NA | NA |
| 27 | 49  | LNPAFLWGAY NA | NA |
| 26 | 26  | LNPAFLVDQH NA | NA |
| 29 | 29  | LNPAFLFAGG NA | NA |
| 32 | 20  | LNPAFLIGWI NA | NA |
| 19 | 37  | LNPAFLIGTI NA | NA |
| 12 | 13  | LNPAFLLVMY NA | NA |
| 19 | 22  | LNPAFLIKHA NA | NA |
| 36 | 44  | LNPAFLIYAR NA | NA |
| 37 | 60  | LNPAFLAGQY NA | NA |
| 25 | 21  | GEVFSLIKPO NA | NA |
| 15 | 16  | GEVFSLLASV NA | NA |
| 14 | 13  | GEVFSLEKTA NA | NA |
| 3  | 11  | GEVFSLTVEY NA | NA |
| 51 | 54  | NHVWPLIYNG NA | NA |
| 61 | 93  | NHVWPLIRIG NA | NA |
| 23 | 38  | YDIHFLIVIR NA | NA |
| 77 | 78  | YDIHFLAKHH NA | NA |
| 87 | 91  | YDIHFLKMOK NA | NA |
| 29 | 43  | APVLALIMHG NA | NA |
| 38 | 42  | HSPWFLSQQL NA | NA |
| 73 | 68  | HSPWFLANMK NA | NA |
| 66 | 73  | HSPWFLRRQT NA | NA |
| 55 | 66  | HSPWFLIGRV NA | NA |
| 50 | 44  | HSPWFLIGVT NA | NA |
| 36 | 40  | SAPFPLRVKR NA | NA |
| 16 | 24  | WIVYSLIKAI NA | NA |
| 23 | 41  | DSVYSLIKGQ NA | NA |
| 23 | 35  | LTVYSLIKPF NA | NA |
| 24 | 34  | HTVYSLIKPT NA | NA |
| 76 | 71  | IKVYSLIKGA NA | NA |
| 11 | 19  | TPVYSLIKAH NA | NA |
| 24 | 38  | FAVYSLIKSW NA | NA |
| 17 | 13  | MRVYSLIKNA NA | NA |
| 42 | 38  | VFVYSLIKGR NA | NA |
| 11 | 11  | HWVYSLIKEF NA | NA |
| 40 | 45  | ITVYSLIKLQ NA | NA |



|     |     |               |    |
|-----|-----|---------------|----|
| 12  | 30  | SPPLALALLF NA | NA |
| 20  | 26  | SPPLALINGG NA | NA |
| 21  | 14  | SPPLALIYTT NA | NA |
| 27  | 40  | SPPLALVGLK NA | NA |
| 26  | 32  | SPPLALIQEI NA | NA |
| 50  | 63  | IYVAALTMPY NA | NA |
| 83  | 91  | WDVAALTMPL NA | NA |
| 64  | 65  | MSPFYLRNQF NA | NA |
| 19  | 40  | GSPFYLRNNI NA | NA |
| 39  | 68  | YMPFYLRNPK NA | NA |
| 115 | 132 | KNPFYLRNHW NA | NA |
| 69  | 83  | SSPFYLRNWI NA | NA |
| 92  | 118 | AKPFYLRNHL NA | NA |
| 70  | 73  | QNPFYLRNGF NA | NA |
| 53  | 61  | CDPFYLRNQG NA | NA |
| 48  | 58  | ETPFYLRNTL NA | NA |
| 115 | 130 | LKPFYLRNNV NA | NA |
| 30  | 28  | IAPFYLRNEV NA | NA |
| 66  | 74  | KMVYMLRANS NA | NA |
| 72  | 70  | KMVYMLAYGQ NA | NA |
| 59  | 81  | KMVYMLVDGF NA | NA |
| 33  | 54  | HGLWSLIYKA NA | NA |
| 39  | 43  | VAPWALKKVH NA | NA |
| 57  | 90  | YQVWALKKVQ NA | NA |
| 57  | 70  | CPPWALKKVL NA | NA |
| 32  | 37  | RSIWALKKVV NA | NA |
| 8   | 10  | PRVWLLRARA NA | NA |
| 8   | 20  | PRVWLLRLMY NA | NA |
| 31  | 47  | PRVWLLKYPG NA | NA |
| 10  | 18  | PRVWLLAVAI NA | NA |
| 37  | 48  | PRVWLLISGT NA | NA |
| 14  | 21  | VPPEAIVYNI NA | NA |
| 11  | 12  | NYPFFLRKGS NA | NA |
| 26  | 37  | YWPFFLRKSL NA | NA |
| 33  | 57  | PTPFFLRKMR NA | NA |
| 42  | 53  | YWPFFLRKGA NA | NA |
| 29  | 40  | GDPFFLRKVT NA | NA |
| 99  | 82  | TKPFFLRKVA NA | NA |
| 1   | 9   | NAPFFLRKEG NA | NA |
| 113 | 130 | SIAFALRRQW NA | NA |
| 32  | 34  | SIAFALIYTK NA | NA |

|     |     |               |    |
|-----|-----|---------------|----|
| 27  | 22  | SIAFALILKT NA | NA |
| 34  | 55  | QRPAQLAMPW NA | NA |
| 13  | 12  | QRPAQLIQVR NA | NA |
| 17  | 17  | QRPAQLFGNF NA | NA |
| 56  | 73  | QRPAQLYRRL NA | NA |
| 32  | 27  | QRPAQLRKHT NA | NA |
| 27  | 49  | QRPAQLYKWG NA | NA |
| 22  | 23  | QRPAQLWMRF NA | NA |
| 18  | 25  | QRPAQLTGQQ NA | NA |
| 43  | 46  | QRPAQLVVHH NA | NA |
| 50  | 68  | NTPYPLRGTV NA | NA |
| 52  | 92  | CTPYPLRDRV NA | NA |
| 43  | 62  | GTPYPLRVAH NA | NA |
| 36  | 54  | GTPYPLRALV NA | NA |
| 37  | 83  | QTPYPLRRQL NA | NA |
| 39  | 43  | RTPYPLRGGY NA | NA |
| 64  | 73  | QTPYPLRMGF NA | NA |
| 31  | 48  | GTPYPLRSNW NA | NA |
| 64  | 72  | YTPYPLRAVA NA | NA |
| 61  | 62  | RTPYPLRDRW NA | NA |
| 31  | 37  | QTPYPLRSIT NA | NA |
| 25  | 45  | TNPIMLVGQR NA | NA |
| 48  | 59  | TNPIMLIDEF NA | NA |
| 58  | 46  | TNPIMLISLL NA | NA |
| 62  | 48  | TNPIMLIMWR NA | NA |
| 76  | 86  | AHVFALWMKK NA | NA |
| 42  | 67  | AHVFALMYAT NA | NA |
| 56  | 92  | AHVFALYYEG NA | NA |
| 36  | 33  | AHVFALFAMW NA | NA |
| 41  | 46  | AHVFALAKQF NA | NA |
| 43  | 52  | AHVFALWSWG NA | NA |
| 43  | 49  | AHVFALASQV NA | NA |
| 44  | 41  | AHVFALSSMA NA | NA |
| 143 | 180 | AHVFALSYRL NA | NA |
| 24  | 45  | AHVFALLLWT NA | NA |
| 23  | 25  | YGPFLLKGIH NA | NA |
| 39  | 38  | GGPFLLKSWS NA | NA |
| 28  | 30  | WGPFLLKNMK NA | NA |
| 41  | 49  | IGPFLLKMGL NA | NA |
| 48  | 52  | VGPFLLKAGW NA | NA |
| 30  | 24  | VGPFLLKGTR NA | NA |

|     |     |            |    |    |
|-----|-----|------------|----|----|
| 10  | 11  | GGPFLKKNR  | NA | NA |
| 15  | 19  | FGPFLKANY  | NA | NA |
| 22  | 20  | DGPFLKGKK  | NA | NA |
| 56  | 84  | ERIYALKSKG | NA | NA |
| 58  | 54  | ERIYALANEL | NA | NA |
| 51  | 62  | ERIYALMLPF | NA | NA |
| 31  | 49  | ERIYALILVF | NA | NA |
| 124 | 161 | ERIYALHMRR | NA | NA |
| 64  | 74  | ERIYALTMSV | NA | NA |
| 14  | 20  | ERIYALTLQR | NA | NA |
| 144 | 162 | ERIYALSLMV | NA | NA |
| 65  | 85  | ERIYALHVET | NA | NA |
| 16  | 17  | ERIYALKKNY | NA | NA |
| 26  | 34  | AGPQPLVYKG | NA | NA |
| 19  | 22  | AGPQPLANLR | NA | NA |
| 28  | 35  | AGPQPLIGGY | NA | NA |
| 11  | 23  | AGPQPLVDPR | NA | NA |
| 62  | 74  | VMVWNIVRHY | NA | NA |
| 42  | 43  | VMVWNIVGQY | NA | NA |
| 32  | 38  | VMVWNIVAPT | NA | NA |
| 24  | 24  | VMVWNIISRA | NA | NA |
| 35  | 40  | GSVWALAYTF | NA | NA |
| 64  | 77  | GSVWALWMTK | NA | NA |
| 37  | 35  | GSVWALASKH | NA | NA |
| 21  | 32  | GSVWALAVSR | NA | NA |
| 44  | 49  | GSVWALAGSQ | NA | NA |
| 51  | 57  | GSVWALSGRY | NA | NA |
| 49  | 40  | GSVWALAMHF | NA | NA |
| 23  | 22  | RGPYMLKGSY | NA | NA |
| 60  | 63  | RGPYMLTSHR | NA | NA |
| 81  | 98  | RGPYMLRRGW | NA | NA |
| 63  | 81  | FPVLSLIGHR | NA | NA |
| 29  | 42  | FPVLSLIQLV | NA | NA |
| 92  | 118 | GMPWSVIMGH | NA | NA |
| 81  | 78  | GMPWSVGGV  | NA | NA |
| 36  | 50  | GMPWSVLT   | NA | NA |
| 47  | 48  | GMPWSVFQMQ | NA | NA |
| 44  | 44  | GMPWSVMVQG | NA | NA |
| 47  | 60  | GMPWSVFMVK | NA | NA |
| 48  | 70  | MFPWSLVNLL | NA | NA |
| 34  | 37  | YQPMSLVNLL | NA | NA |

|     |                   |    |
|-----|-------------------|----|
| 40  | 66 RQVWSLVNLL NA  | NA |
| 80  | 92 YRIYELWSTH NA  | NA |
| 59  | 83 CRIYELWNKY NA  | NA |
| 55  | 63 NRIYELWMEG NA  | NA |
| 61  | 73 GRIYELWVKY NA  | NA |
| 43  | 58 VRIYELWAVQ NA  | NA |
| 55  | 59 GRIYELWGWA NA  | NA |
| 46  | 60 ERIYELWGIV NA  | NA |
| 67  | 77 DRIYELWATQ NA  | NA |
| 51  | 35 GRIYELWQAW NA  | NA |
| 47  | 41 LRIYELWYQG NA  | NA |
| 46  | 52 ARIYELWKAQ NA  | NA |
| 77  | 98 SDPQSLVLRN NA  | NA |
| 31  | 39 NQIYSLVLRN NA  | NA |
| 113 | 134 SQPHLLIAHL NA | NA |
| 41  | 41 SQPHLLKRTY NA  | NA |
| 54  | 71 SQPHLLRSGF NA  | NA |
| 37  | 47 SQPHLLRGKG NA  | NA |
| 32  | 27 RDVLALVSPF NA  | NA |
| 35  | 38 RDVLALVDEA NA  | NA |
| 60  | 86 RDVLALSYGK NA  | NA |
| 5   | 9 RDVLALADGG NA   | NA |
| 44  | 47 GHPYTLVMKR NA  | NA |
| 73  | 71 KHPYTLVMKH NA  | NA |
| 44  | 45 SFPYTLVMRI NA  | NA |
| 37  | 44 DIPYTLVMGS NA  | NA |
| 72  | 87 FHPYTLVMHH NA  | NA |
| 68  | 89 HYPYTLVMAQ NA  | NA |
| 24  | 36 VTPYTLVMST NA  | NA |
| 51  | 76 YYPYTLVMRS NA  | NA |
| 58  | 73 HKPYTLVMPI NA  | NA |
| 61  | 62 PQPYTLVMRL NA  | NA |
| 44  | 36 CQPYTLVMTS NA  | NA |
| 17  | 18 NWPYSLIALG NA  | NA |
| 9   | 23 RFVYSLIALG NA  | NA |
| 10  | 14 KMYSLIALG NA   | NA |
| 36  | 30 LTVFSLRTWK NA  | NA |
| 49  | 65 HRPFGLIQMI NA  | NA |
| 55  | 64 HRPFGLIDLK NA  | NA |
| 136 | 141 KRVAALRVQL NA | NA |
| 100 | 93 QFPMALTMPL NA  | NA |

|     |     |               |    |
|-----|-----|---------------|----|
| 47  | 61  | ERPAALTMPL NA | NA |
| 25  | 13  | LQPLTIKNVV NA | NA |
| 26  | 26  | LQPLTIIVTG NA | NA |
| 42  | 41  | LQPLTILRLR NA | NA |
| 31  | 38  | LQPLTIVDRA NA | NA |
| 15  | 13  | LQPLTIIGQY NA | NA |
| 33  | 32  | LQPLTIVVQG NA | NA |
| 35  | 45  | LQPLTIAGQK NA | NA |
| 29  | 33  | LQPLTIVYGS NA | NA |
| 39  | 38  | LQPLTIRQGR NA | NA |
| 18  | 37  | ISPMLLINRG NA | NA |
| 16  | 20  | ISPMLLIRKG NA | NA |
| 99  | 124 | KYPHLLIRNL NA | NA |
| 176 | 188 | CNPHLLIRHR NA | NA |
| 85  | 113 | IWPHLLIRNL NA | NA |
| 106 | 131 | MNPHLLIRPQ NA | NA |
| 74  | 85  | MHPHLLIRKT NA | NA |
| 137 | 151 | VYPHLLIRAL NA | NA |
| 140 | 172 | IYPHLLIRSS NA | NA |
| 80  | 117 | MIPHLLIRVH NA | NA |
| 99  | 122 | CWPHLLIRMR NA | NA |
| 30  | 33  | ASPHLLIRQI NA | NA |
| 29  | 24  | QRPLQYRQIA NA | NA |
| 69  | 76  | PRPLQYRLVL NA | NA |
| 62  | 84  | KRPLQYRAMA NA | NA |
| 75  | 82  | DRPLQYRGSV NA | NA |
| 41  | 57  | WRPLQYRNKR NA | NA |
| 137 | 116 | SRPLQYRLL NA  | NA |
| 87  | 96  | FRPLQYRNGH NA | NA |
| 60  | 77  | MRPLQYRGQG NA | NA |
| 63  | 82  | FRPLQYRLAA NA | NA |
| 50  | 74  | RRPLQYRDEG NA | NA |
| 137 | 166 | VRPLQYRALW NA | NA |
| 13  | 8   | INVAPLILPG NA | NA |
| 44  | 44  | VNVAPLILVS NA | NA |
| 15  | 19  | VYVAPLILHK NA | NA |
| 5   | 7   | YFVAPLILRG NA | NA |
| 24  | 29  | PNVAPLILMY NA | NA |
| 19  | 37  | NNVAPLILGF NA | NA |
| 22  | 25  | QSVAPLILRG NA | NA |
| 22  | 33  | DFVAPLILVS NA | NA |

|    |                   |    |
|----|-------------------|----|
| 49 | 60 NIVAPLILGH NA  | NA |
| 0  | 2 HFVAPLILQV NA   | NA |
| 30 | 24 IPVAPLILLY NA  | NA |
| 62 | 84 ISPATLIAIW NA  | NA |
| 19 | 26 ISPATLVLKG NA  | NA |
| 31 | 50 ISPATLVGGH NA  | NA |
| 19 | 23 ISPATLLDGL NA  | NA |
| 14 | 17 ISPATLHYAY NA  | NA |
| 12 | 14 ISPATLVGPG NA  | NA |
| 21 | 40 MQIFPLMLPF NA  | NA |
| 6  | 5 AHPWLQRMQG NA   | NA |
| 80 | 91 YHPWLQRQAA NA  | NA |
| 25 | 37 SHPWLQRALA NA  | NA |
| 29 | 36 EHPWLQRDNQ NA  | NA |
| 45 | 54 NHPWLQRLQG NA  | NA |
| 24 | 35 NHPWLQRLMI NA  | NA |
| 50 | 64 GHPWLQVRVQ NA  | NA |
| 41 | 33 GHPWLQRQRG NA  | NA |
| 28 | 40 THPWLQRNHK NA  | NA |
| 41 | 45 HHPWLQRGWQ NA  | NA |
| 67 | 76 CHPWLQRNGG NA  | NA |
| 96 | 133 MVPHMLHMMT NA | NA |
| 46 | 50 THPLELRVNI NA  | NA |
| 32 | 35 GRVLELRVNV NA  | NA |
| 32 | 40 SAVLELRVNR NA  | NA |
| 46 | 56 GTVWALTNSQ NA  | NA |
| 37 | 48 YTVWALTNTW NA  | NA |
| 40 | 60 QTVWALTKMA NA  | NA |
| 61 | 67 PTVWALTVQK NA  | NA |
| 36 | 59 PTVWALTKGV NA  | NA |
| 45 | 74 STVWALTNVS NA  | NA |
| 26 | 54 LTVWALTMIV NA  | NA |
| 93 | 99 RTVWALTRRA NA  | NA |
| 62 | 80 CTVWALTSGH NA  | NA |
| 62 | 84 HTVWALTKAV NA  | NA |
| 37 | 68 HPVFNLAFLH NA  | NA |
| 3  | 2 WPFVFNLAFLH NA  | NA |
| 20 | 27 GKVFNLAFPH NA  | NA |
| 50 | 57 TQVFNLAFEV NA  | NA |
| 32 | 32 CYVFNLAFWV NA  | NA |
| 46 | 46 KRVFNLAFLK NA  | NA |

|     |     |               |    |
|-----|-----|---------------|----|
| 23  | 24  | FTVFNLAFRG NA | NA |
| 34  | 52  | YPVFNLAFGS NA | NA |
| 41  | 59  | FQVFNLAFGH NA | NA |
| 3   | 3   | LWVFNLAFWH NA | NA |
| 182 | 254 | PSVFNLAFRW NA | NA |
| 38  | 40  | CFPYALIAND NA | NA |
| 78  | 81  | MTVFQLLLRN NA | NA |
| 34  | 37  | PRVFQLRVFL NA | NA |
| 22  | 21  | TSVLALALVF NA | NA |
| 35  | 38  | TSVLALTDGG NA | NA |
| 33  | 47  | TSVLALVAQA NA | NA |
| 17  | 20  | TMPAPLVLQF NA | NA |
| 41  | 58  | WYPAPLVLTQ NA | NA |
| 51  | 58  | EMPAPLVLPV NA | NA |
| 28  | 45  | LYPAPLVLVI NA | NA |
| 49  | 61  | VWPAPLVLKR NA | NA |
| 37  | 39  | CHPAPLVLAG NA | NA |
| 26  | 30  | PNPAPLVLNY NA | NA |
| 38  | 44  | LDPAPLVLMV NA | NA |
| 74  | 50  | MMPLTLNSTA NA | NA |
| 6   | 18  | KPPLTLNSKY NA | NA |
| 37  | 53  | MSPLTLNSVG NA | NA |
| 20  | 24  | PDPLTLNSMI NA | NA |
| 20  | 29  | ETPLTLNSQG NA | NA |
| 19  | 12  | EFPLTLNSST NA | NA |
| 15  | 8   | SSPLTLNSAF NA | NA |
| 31  | 54  | FSPLTLNSEL NA | NA |
| 17  | 37  | RHPLTLNSWF NA | NA |
| 60  | 74  | QSPVQLIGHL NA | NA |
| 24  | 38  | QSPVQLAGMK NA | NA |
| 17  | 16  | QSPVQLIAMS NA | NA |
| 4   | 2   | APVYALALGG NA | NA |
| 19  | 29  | APVYALIDSL NA | NA |
| 50  | 79  | APVYALIMNW NA | NA |
| 11  | 16  | APVYALVSSG NA | NA |
| 42  | 53  | APVYALSMQK NA | NA |
| 20  | 29  | APVYALTQAL NA | NA |
| 12  | 32  | APVYALIDAV NA | NA |
| 38  | 48  | APVYALAKMQ NA | NA |
| 69  | 77  | APVYALMYVV NA | NA |
| 17  | 28  | APPWQLRMWI NA | NA |

|     |                   |    |
|-----|-------------------|----|
| 47  | 55 DYPWYLRMWI NA  | NA |
| 126 | 130 CQPFALSMQV NA | NA |
| 49  | 49 RQPFALSSNR NA  | NA |
| 44  | 77 SQPFALSGAA NA  | NA |
| 58  | 68 GQPFALSGTR NA  | NA |
| 44  | 62 LQPFALSAGF NA  | NA |
| 69  | 64 AQPFALSREL NA  | NA |
| 27  | 30 EQPFALSNTG NA  | NA |
| 41  | 34 HQPFALSSTG NA  | NA |
| 65  | 64 TQPFALSNPS NA  | NA |
| 56  | 66 EQPFALSNEL NA  | NA |
| 44  | 65 QQPFALSGNW NA  | NA |
| 30  | 35 PDVFALMYLQ NA  | NA |
| 17  | 25 PDVFALVNIG NA  | NA |
| 36  | 65 PDVFALAVKR NA  | NA |
| 71  | 72 PDVFALTRTA NA  | NA |
| 36  | 47 PDVFALIVMI NA  | NA |
| 24  | 37 PDVFALKNNG NA  | NA |
| 97  | 134 PDVFALHGNH NA | NA |
| 94  | 127 SSPLYLRVRR NA | NA |
| 35  | 48 SSPLYLAKQV NA  | NA |
| 35  | 61 SSPLYLIKHH NA  | NA |
| 45  | 71 LVVAALIGNY NA  | NA |
| 39  | 71 LVVAALKQNV NA  | NA |
| 40  | 49 LVVAALTGEG NA  | NA |
| 35  | 50 LVVAALVNVI NA  | NA |
| 76  | 76 LVVAALLRKS NA  | NA |
| 44  | 47 LVVAALMNRI NA  | NA |
| 78  | 95 LVVAALTALS NA  | NA |
| 17  | 18 RTPLMLIKNG NA  | NA |
| 11  | 17 RTPLMLIVWI NA  | NA |
| 34  | 37 RYPWALVDSY NA  | NA |
| 62  | 80 RYPWALSATY NA  | NA |
| 31  | 27 RYPWALKVPA NA  | NA |
| 105 | 124 RYPWALRLLW NA | NA |
| 52  | 67 RYPWALILSG NA  | NA |
| 54  | 48 RYPWALIMVY NA  | NA |
| 64  | 79 RYPWALIQVH NA  | NA |
| 43  | 41 RYPWALLDRT NA  | NA |
| 56  | 54 VHVHALIRPK NA  | NA |
| 45  | 45 VHVHALILVR NA  | NA |



|     |     |                |    |
|-----|-----|----------------|----|
| 12  | 18  | WHPIPIRKPT NA  | NA |
| 23  | 17  | PRPIPIRKHI NA  | NA |
| 30  | 27  | SWPIPIRKGQ NA  | NA |
| 31  | 41  | GQPIPIRKAG NA  | NA |
| 28  | 43  | PTPIPIRKQA NA  | NA |
| 63  | 75  | KKPIPIRKQI NA  | NA |
| 25  | 42  | SDPIPIRKGS NA  | NA |
| 36  | 44  | GHPIPIRKLA NA  | NA |
| 22  | 17  | DTPIPIRKTY NA  | NA |
| 34  | 35  | KSPIPIRKAY NA  | NA |
| 26  | 30  | DFPIPIRKPG NA  | NA |
| 5   | 8   | ALPQALLQRQ NA  | NA |
| 33  | 48  | NLPQALLYVV NA  | NA |
| 52  | 64  | KLPQALLNPR NA  | NA |
| 50  | 70  | NLPQALLNVK NA  | NA |
| 19  | 27  | NLPQALLDSH NA  | NA |
| 45  | 73  | SLPQALLKEV NA  | NA |
| 39  | 31  | PLPQALLMTI NA  | NA |
| 45  | 54  | LLPQALLDIT NA  | NA |
| 47  | 63  | FLPQALLRNG NA  | NA |
| 68  | 55  | YLPQALLSSR NA  | NA |
| 38  | 31  | QLPQALLGGW NA  | NA |
| 53  | 80  | YRVAFLTGTQ NA  | NA |
| 19  | 39  | VIVAALIAGY NA  | NA |
| 45  | 65  | VIVAALRGMF NA  | NA |
| 34  | 38  | VIVAALIAWS NA  | NA |
| 52  | 58  | VIVAALSVMF NA  | NA |
| 64  | 97  | HPAALIVGT NA   | NA |
| 105 | 94  | HPAALHKVH NA   | NA |
| 102 | 141 | HPAALIAKQ NA   | NA |
| 75  | 81  | HPAALAMGV NA   | NA |
| 29  | 49  | VTPLYLANHF NA  | NA |
| 78  | 82  | VTPLYLVGGW NA  | NA |
| 54  | 78  | NFPMSLIMKV NA  | NA |
| 82  | 104 | HGPMSLVDEV NA  | NA |
| 48  | 45  | HGPMSLIYIA NA  | NA |
| 20  | 20  | KRAASLILGG NA  | NA |
| 37  | 48  | AAPAFCLKQTR NA | NA |
| 26  | 29  | RAPAFCLKLVV NA | NA |
| 27  | 25  | HAPAFCLKYHK NA | NA |
| 12  | 30  | LAPAFCLKRAR NA | NA |

|     |     |               |    |
|-----|-----|---------------|----|
| 8   | 7   | KAPAFKDLG NA  | NA |
| 18  | 20  | QAPAFKML NA   | NA |
| 5   | 10  | QAPAFKAS NA   | NA |
| 13  | 18  | KAPAFKDH NA   | NA |
| 3   | 6   | EAPAFKMA NA   | NA |
| 55  | 63  | SRILALKMGA NA | NA |
| 55  | 57  | ARILALKMGA NA | NA |
| 50  | 59  | SRPLNLIGN NA  | NA |
| 116 | 137 | WPVFSKLRW NA  | NA |
| 20  | 25  | VAVFSKLV NA   | NA |
| 37  | 35  | KPVFSKLLL NA  | NA |
| 25  | 31  | NYVFSKLSK NA  | NA |
| 29  | 43  | NIVFSKLI NA   | NA |
| 9   | 18  | AMVFSKLEA NA  | NA |
| 36  | 37  | MQVFSKLP NA   | NA |
| 23  | 15  | PHVFSKLV NA   | NA |
| 10  | 13  | EFVFSKLG NA   | NA |
| 24  | 19  | GQVFSKLM NA   | NA |
| 58  | 59  | TLPHSVLAQ NA  | NA |
| 63  | 55  | TLPHSVYRI NA  | NA |
| 101 | 119 | TLPHSVVL NA   | NA |
| 14  | 15  | TLPVSLTSS NA  | NA |
| 115 | 150 | TLPVSLIKRW NA | NA |
| 44  | 60  | TLPVSLTNR NA  | NA |
| 33  | 32  | TLPVSLIKE NA  | NA |
| 35  | 36  | DAPVFLVVQ NA  | NA |
| 33  | 39  | DAPVFLSDG NA  | NA |
| 53  | 64  | DAPVFLRDW NA  | NA |
| 23  | 14  | DAPVFLADM NA  | NA |
| 32  | 31  | DAPVFLKSG NA  | NA |
| 73  | 95  | DAPVFLRRH NA  | NA |
| 55  | 79  | ERIWALALR NA  | NA |
| 131 | 159 | ERIWALRVL NA  | NA |
| 22  | 35  | ERIWALLQL NA  | NA |
| 49  | 62  | ERIWALAKH NA  | NA |
| 34  | 31  | ERIWALKSQ NA  | NA |
| 56  | 56  | ERIWALHGVI NA | NA |
| 49  | 70  | ERIWALANQ NA  | NA |
| 39  | 41  | ERIWALKSPT NA | NA |
| 50  | 60  | ERIWALHVIS NA | NA |
| 61  | 62  | ERIWALFRSI NA | NA |

|     |                   |    |
|-----|-------------------|----|
| 81  | 93 FHAAAYTMVA NA  | NA |
| 18  | 25 KSPAYLHGAI NA  | NA |
| 83  | 87 IRVAALREKV NA  | NA |
| 21  | 39 TMPYLLIGPT NA  | NA |
| 72  | 82 TMPYLLRNGR NA  | NA |
| 49  | 58 CDPQQLLTK NA   | NA |
| 36  | 50 RRVLALSSVQ NA  | NA |
| 28  | 36 RRVLALSQTG NA  | NA |
| 47  | 56 RRVLALTMSR NA  | NA |
| 61  | 58 RRVLALVRKL NA  | NA |
| 62  | 80 RRVLALVSLW NA  | NA |
| 20  | 23 APIMQLRREY NA  | NA |
| 35  | 52 TFVMQLRREY NA  | NA |
| 56  | 77 LQAFALVAKQ NA  | NA |
| 16  | 36 RRPLRIIVEF NA  | NA |
| 35  | 33 RIPASLTFNT NA  | NA |
| 38  | 41 GAIASLTFNT NA  | NA |
| 37  | 38 GFYQLFNVG NA   | NA |
| 29  | 22 TTPQAVVKMA NA  | NA |
| 37  | 68 LPPQAVVKS NA   | NA |
| 20  | 27 GNPQAVVKST NA  | NA |
| 11  | 19 DAPQAVVKIA NA  | NA |
| 47  | 55 GRPQAVVKMR NA  | NA |
| 11  | 14 PSPQAVVKVT NA  | NA |
| 57  | 68 AFPQAVVKKW NA  | NA |
| 33  | 54 GIPQAVVKTW NA  | NA |
| 47  | 49 IDPQAVVKGH NA  | NA |
| 27  | 36 HNPQAVVKVS NA  | NA |
| 23  | 25 QIPQAVVKSK NA  | NA |
| 25  | 31 NSPQLLTQPQ NA  | NA |
| 20  | 12 NSPQLLSGSF NA  | NA |
| 34  | 45 NSPQLLAYWG NA  | NA |
| 24  | 35 NSPQLLTMIK NA  | NA |
| 34  | 32 RAGFQLIVMS NA  | NA |
| 17  | 19 SSPLNYVGKK NA  | NA |
| 71  | 82 YSTLRMMRQR NA  | NA |
| 77  | 123 YSTLRQHVGI NA | NA |
| 59  | 72 YSTLRHALMI NA  | NA |
| 38  | 48 YSTLRYQLAS NA  | NA |
| 49  | 76 YSTLRFVRML NA  | NA |
| 103 | 147 YSTLRHLLT NA  | NA |

|     |                   |    |
|-----|-------------------|----|
| 65  | 58 YSTLRFRASF NA  | NA |
| 67  | 74 YSTLRHALIT NA  | NA |
| 72  | 85 YSTLRHFVES NA  | NA |
| 113 | 147 YSTLRHSAIQ NA | NA |
| 51  | 74 VLLGNFHLSF NA  | NA |
| 69  | 64 VLLGNFHGGA NA  | NA |
| 33  | 35 HAPSLYLDAF NA  | NA |
| 4   | 13 HAPSLYFGTI NA  | NA |
| 36  | 31 HAPSLYQVTG NA  | NA |
| 33  | 25 HAPSLYQKWI NA  | NA |
| 36  | 26 HAPSLYQYQI NA  | NA |
| 43  | 72 LQLALYQNWG NA  | NA |
| 45  | 46 LQLALYHDAK NA  | NA |
| 113 | 108 NIPTRLWANQ NA | NA |
| 51  | 54 NIPTRLQMVK NA  | NA |
| 19  | 33 YASIRYMNKV NA  | NA |
| 12  | 13 YASIRIFNII NA  | NA |
| 28  | 47 YASIRYRRVY NA  | NA |
| 53  | 90 YASIRHHGMA NA  | NA |
| 19  | 16 YASIRQMGST NA  | NA |
| 57  | 76 YASIRWYSGH NA  | NA |
| 11  | 23 YASIRIIGTI NA  | NA |
| 24  | 27 YASIRYQNIK NA  | NA |
| 32  | 24 YASIRVMGMI NA  | NA |
| 22  | 23 YASIRFKYWV NA  | NA |
| 28  | 30 PTLQYLFDKT NA  | NA |
| 6   | 15 RGPSSYQSQI NA  | NA |
| 39  | 60 FHPSRFQDLY NA  | NA |
| 46  | 57 FHPSRFQYTI NA  | NA |
| 107 | 123 FHPSRFQAMK NA | NA |
| 78  | 80 SVPSTLHGGK NA  | NA |
| 37  | 52 NMGLNLTVKT NA  | NA |
| 29  | 37 QQGQNLTVKT NA  | NA |
| 25  | 38 NRGYNLTVKT NA  | NA |
| 99  | 119 FEPQRMFGWT NA | NA |
| 49  | 65 FEPQRMWDSK NA  | NA |
| 66  | 51 FEPQRMMAGG NA  | NA |
| 62  | 74 KRVYLLVGNL NA  | NA |
| 63  | 81 KRVYLLSDLI NA  | NA |
| 27  | 40 KRVYLLWDPI NA  | NA |
| 49  | 42 KRVYLLVQGI NA  | NA |

|     |     |            |    |    |
|-----|-----|------------|----|----|
| 58  | 67  | KRVYLLQSSQ | NA | NA |
| 46  | 54  | KRVYLLFMSF | NA | NA |
| 57  | 66  | KRVYLLMDVF | NA | NA |
| 99  | 112 | KHPYKYSSVW | NA | NA |
| 43  | 52  | KHPYKYLAAG | NA | NA |
| 25  | 37  | KHPYKYSKKA | NA | NA |
| 55  | 102 | LKVMNYIYVW | NA | NA |
| 96  | 149 | LKVMNYLLRS | NA | NA |
| 69  | 70  | LKVMNYSMEI | NA | NA |
| 153 | 201 | LKVMNYFKPQ | NA | NA |
| 36  | 43  | LKVMNYTSPT | NA | NA |
| 77  | 80  | LKVMNYTQGG | NA | NA |
| 147 | 144 | LKVMNYYSVQ | NA | NA |
| 66  | 82  | LKVMNYYGMI | NA | NA |
| 79  | 119 | LKVMNYKGVA | NA | NA |
| 74  | 84  | LKVMNYSNKI | NA | NA |
| 21  | 20  | NGPYNLVLHI | NA | NA |
| 14  | 16  | NGPYNLFNHI | NA | NA |
| 34  | 41  | WQAYNFQAER | NA | NA |
| 58  | 47  | HSAYNFQAGQ | NA | NA |
| 48  | 62  | RRAYNFQAGT | NA | NA |
| 39  | 49  | GIAYNFQAKI | NA | NA |
| 35  | 55  | CYAYNFQAIF | NA | NA |
| 36  | 38  | YHAYNFQAPY | NA | NA |
| 23  | 30  | ARAYNFQAKT | NA | NA |
| 6   | 15  | EPAYNFQAEI | NA | NA |
| 50  | 82  | ILVWNYSAPF | NA | NA |
| 71  | 101 | ILVWNYQRKL | NA | NA |
| 48  | 80  | KSPSLYQYMY | NA | NA |
| 73  | 77  | KSPSLYFALH | NA | NA |
| 22  | 13  | KSPSLYVMPK | NA | NA |
| 6   | 12  | KSPSLYFAPS | NA | NA |
| 72  | 100 | YSPMDYLGHQ | NA | NA |
| 47  | 58  | YSPMDYVGMF | NA | NA |
| 22  | 36  | YSPMDYQALI | NA | NA |
| 46  | 38  | YSPMDYADTI | NA | NA |
| 16  | 28  | GNPYKLVRVG | NA | NA |
| 43  | 45  | ERSLNLMDKY | NA | NA |
| 28  | 33  | ERSLNLWGTF | NA | NA |
| 56  | 66  | TTPYHIVGQI | NA | NA |
| 75  | 115 | TTPYHIVDHA | NA | NA |

|     |     |                |    |
|-----|-----|----------------|----|
| 53  | 68  | WQGHYLRILQ NA  | NA |
| 2   | 3   | HAVYDLRILQ NA  | NA |
| 81  | 108 | DPHFYLRWATP NA | NA |
| 63  | 86  | SNLNSQWKMV NA  | NA |
| 23  | 25  | YDVYNLFDAY NA  | NA |
| 23  | 31  | YDVYNLFQWG NA  | NA |
| 39  | 42  | ARSYNLSSTW NA  | NA |
| 15  | 18  | ARSYNLSYPF NA  | NA |
| 20  | 20  | ARSYNLVLGG NA  | NA |
| 29  | 35  | ARSYNLMSPV NA  | NA |
| 46  | 60  | RTGLYLWKMG NA  | NA |
| 48  | 72  | RTGLYLFGAR NA  | NA |
| 60  | 70  | RTGLYLWYRT NA  | NA |
| 50  | 46  | RTGLYLMVQG NA  | NA |
| 42  | 45  | SVGLYLWGQW NA  | NA |
| 53  | 56  | SVGLYLTKGY NA  | NA |
| 381 | 491 | SVGLYLTRRW NA  | NA |
| 88  | 106 | SVGLYLTGIH NA  | NA |
| 30  | 37  | SVGLYLTAHI NA  | NA |
| 66  | 65  | SVGLYLHGTV NA  | NA |
| 66  | 85  | DNTFHLTVHY NA  | NA |
| 41  | 68  | DNTFHLMRQH NA  | NA |
| 42  | 46  | DNTFHLTLGL NA  | NA |
| 145 | 181 | PKGYALHVAK NA  | NA |
| 55  | 76  | DRQLSLWSWQ NA  | NA |
| 35  | 50  | TVTQNLRLRG NA  | NA |
| 46  | 56  | TVTQNLHGIY NA  | NA |
| 40  | 41  | TVTQNLMSAG NA  | NA |
| 12  | 22  | TVTQNLVSSK NA  | NA |
| 55  | 79  | TVTQNLVLVH NA  | NA |
| 14  | 19  | SRAYSLVYGV NA  | NA |
| 14  | 9   | SRAYSLVQSS NA  | NA |
| 98  | 118 | HRQQNLMSAT NA  | NA |
| 112 | 149 | HRQQNLFRWG NA  | NA |
| 97  | 113 | HRQQNLWYAO NA  | NA |
| 52  | 61  | HRQQNLWGEG NA  | NA |
| 61  | 59  | HRQQNLWGGT NA  | NA |
| 82  | 107 | VKAYNLFVGF NA  | NA |
| 137 | 163 | VKAYNLFYHG NA  | NA |
| 49  | 45  | VKAYNLVNGR NA  | NA |
| 38  | 63  | VKAYNLSKKQ NA  | NA |

|    |    |            |    |    |
|----|----|------------|----|----|
| 18 | 21 | YAGIELRVKR | NA | NA |
| 5  | 3  | TVSYALFSLQ | NA | NA |
| 29 | 40 | TVSYALMNPR | NA | NA |
| 14 | 21 | YDTQHLWRSF | NA | NA |
| 20 | 14 | YDTQHLTNQI | NA | NA |
| 52 | 63 | YDTQHLTVPW | NA | NA |
| 75 | 81 | KMVYMLFSPV | NA | NA |
| 50 | 59 | TTHYSLFDTV | NA | NA |
| 89 | 91 | TTHYSLGGY  | NA | NA |
| 52 | 71 | TTHYSLWLGT | NA | NA |
| 65 | 77 | TTHYSLVRWW | NA | NA |
| 69 | 72 | TTHYSLSLER | NA | NA |
| 72 | 71 | TTHYSLWSGT | NA | NA |
| 66 | 74 | TTHYSLSLGG | NA | NA |
| 24 | 31 | TTHYSLFSLK | NA | NA |
| 9  | 21 | TTHYSLFSSL | NA | NA |
| 78 | 76 | ANYSNIFMNV | NA | NA |
| 60 | 77 | ANYSNIFVVA | NA | NA |
| 1  | 0  | LVGNLWNLQ  | NA | NA |
| 50 | 59 | TMGMNMWNNR | NA | NA |
| 46 | 65 | TMGMNMWSGR | NA | NA |
| 41 | 59 | TMGMNMTGMV | NA | NA |
| 48 | 48 | TMGMNMWSGF | NA | NA |
| 36 | 31 | TMGMNMVQKI | NA | NA |
| 49 | 72 | TMGMNMLGRR | NA | NA |
| 61 | 66 | TMGMNMMLVV | NA | NA |
| 32 | 44 | TMGMNMLAGL | NA | NA |
| 44 | 48 | GLGLNLTGIT | NA | NA |
| 60 | 67 | GLGLNLTLWT | NA | NA |
| 43 | 53 | GLGLNLTLGH | NA | NA |
| 30 | 48 | GLGLNLMNAL | NA | NA |
| 47 | 60 | GLGLNLHNIT | NA | NA |
| 33 | 57 | GMAQYLLYNY | NA | NA |
| 39 | 66 | GMAQYLWNNY | NA | NA |
| 71 | 96 | FMGHSLVLR  | NA | NA |
| 27 | 30 | LQSMNLFDR  | NA | NA |
| 38 | 41 | LQSMNLHAAV | NA | NA |
| 48 | 54 | LQSMNLGWV  | NA | NA |
| 33 | 34 | LQSMNLMRGS | NA | NA |
| 59 | 43 | LQSMNLWGVA | NA | NA |
| 69 | 75 | RVTWALMSWG | NA | NA |

|     |                   |    |
|-----|-------------------|----|
| 24  | 32 RVTWALMGVY NA  | NA |
| 47  | 73 IWYLELRLSN NA  | NA |
| 78  | 114 QNWQELRLSN NA | NA |
| 58  | 64 TRGYELRLSN NA  | NA |
| 32  | 34 WISSELRLSN NA  | NA |
| 24  | 34 DYGYRLLQFL NA  | NA |
| 98  | 114 MKGSRLLQFL NA | NA |
| 74  | 100 MRGIRLLQFL NA | NA |
| 62  | 71 VHGWRLQFL NA   | NA |
| 45  | 54 WPSFNLTMEV NA  | NA |
| 23  | 30 LNSFNLTMEQ NA  | NA |
| 17  | 20 HSSFNLTMEH NA  | NA |
| 33  | 34 VMSFNLTMEG NA  | NA |
| 19  | 12 PYSFNLTMTF NA  | NA |
| 7   | 4 FSSFNLTMTG NA   | NA |
| 44  | 49 HHSFNLTMMK NA  | NA |
| 11  | 4 LSSFNLTMTM NA   | NA |
| 25  | 16 DSSFNLTMWL NA  | NA |
| 31  | 45 MHSFNLTMAT NA  | NA |
| 51  | 50 PMSFNLTMAR NA  | NA |
| 25  | 28 WSVQLLFYTS NA  | NA |
| 26  | 39 WSVQLLFQSF NA  | NA |
| 47  | 57 WSVQLLYLER NA  | NA |
| 34  | 46 WSVQLLRKKT NA  | NA |
| 22  | 42 WSVQLLFMAS NA  | NA |
| 61  | 65 WSVQLLYGPQ NA  | NA |
| 48  | 82 KAWSRLVLRV NA  | NA |
| 22  | 37 ENGLELRVNV NA  | NA |
| 22  | 30 GKGLELRVNS NA  | NA |
| 89  | 99 KHGLELRVNF NA  | NA |
| 44  | 55 CISLELRVNF NA  | NA |
| 40  | 61 MHWMLVLRV NA   | NA |
| 90  | 103 MTGMRLVLRV NA | NA |
| 50  | 41 KFGYFLVRS NA   | NA |
| 93  | 118 IKGWFLVRS NA  | NA |
| 18  | 14 VSISFLWGST NA  | NA |
| 11  | 7 VSISFLWYKI NA   | NA |
| 9   | 19 VSISFLWAIG NA  | NA |
| 52  | 61 SHHYQLLRN NA   | NA |
| 98  | 112 CSGFQLRVFW NA | NA |
| 103 | 138 CNGFQLRVFT NA | NA |



|     |                   |    |
|-----|-------------------|----|
| 47  | 62 RDLWKLWDWG NA  | NA |
| 54  | 75 EPIYNLHQHG NA  | NA |
| 50  | 75 EPIYNLWMTW NA  | NA |
| 63  | 93 EPIYNLHKAY NA  | NA |
| 44  | 71 EPIYNLMGRH NA  | NA |
| 61  | 56 EPIYNLWQIW NA  | NA |
| 59  | 54 AVTYALHGKG NA  | NA |
| 60  | 62 AVTYALSKPV NA  | NA |
| 46  | 64 AVTYALFDRF NA  | NA |
| 32  | 37 AVTYALTNRK NA  | NA |
| 40  | 49 RPAQDLWGLA NA  | NA |
| 26  | 28 RPAQDLWKLI NA  | NA |
| 42  | 50 VRTMALWAKF NA  | NA |
| 50  | 65 VRTMALWNMF NA  | NA |
| 61  | 82 STGSRLVVRL NA  | NA |
| 59  | 80 GYWSRLVVRL NA  | NA |
| 39  | 51 CNGVRLVVRL NA  | NA |
| 67  | 75 IVNARLRMQG NA  | NA |
| 377 | 469 IVNARLRQRR NA | NA |
| 79  | 80 IVNARLRLVK NA  | NA |
| 47  | 50 IVNARLYGEY NA  | NA |
| 172 | 254 IVNARLRLRF NA | NA |
| 32  | 61 MFHLNIWVLK NA  | NA |
| 63  | 68 MFHLNIVYEL NA  | NA |
| 82  | 101 TLTHHLVAHG NA | NA |
| 61  | 68 TLTHHLVYMF NA  | NA |
| 95  | 115 EVSQHLWYAH NA | NA |
| 61  | 83 EVSQHLWGRA NA  | NA |
| 65  | 51 EVSQHLWKGH NA  | NA |
| 43  | 53 EVSQHLWNGF NA  | NA |
| 30  | 33 EVSQHLWRGT NA  | NA |
| 32  | 39 EVSQHLWSWK NA  | NA |
| 41  | 37 GKTWALWDGA NA  | NA |
| 77  | 77 YQTMALWGNW NA  | NA |
| 48  | 61 MAYQSLVGMA NA  | NA |
| 27  | 26 EHNLPYATT NA   | NA |
| 61  | 72 EHNLPRLQV NA   | NA |
| 70  | 85 EHNLPVRHT NA   | NA |
| 28  | 41 EHNLPMTGTQ NA  | NA |
| 16  | 15 EHNLPITYET NA  | NA |
| 17  | 16 EHNLPDYDNG NA  | NA |

|     |     |                |    |
|-----|-----|----------------|----|
| 53  | 72  | EHNLPLVDHL NA  | NA |
| 56  | 68  | EHNLPLMMWV NA  | NA |
| 38  | 58  | EHNLPLWGQA NA  | NA |
| 62  | 83  | EHNLPLRVSH NA  | NA |
| 35  | 46  | EHNLPLVLIG NA  | NA |
| 33  | 39  | IEYLNYSWPI NA  | NA |
| 92  | 120 | IEYLNYSKLI NA  | NA |
| 63  | 62  | IEYLNYSFPL NA  | NA |
| 62  | 82  | IEYLNYSFANT NA | NA |
| 185 | 235 | IEYLNYSHDGT NA | NA |
| 44  | 70  | IEYLNYSRGEY NA | NA |
| 90  | 115 | IEYLNYSLSGK NA | NA |
| 34  | 60  | IEYLNYSVQAT NA | NA |
| 44  | 73  | IEYLNYSWLRN NA | NA |
| 45  | 74  | VFYQSLVAHS NA  | NA |
| 36  | 46  | YATWSMWNVG NA  | NA |
| 16  | 12  | YATWSMQSPT NA  | NA |
| 38  | 43  | YATWSMIAGS NA  | NA |
| 27  | 29  | YATWSMSNKK NA  | NA |
| 12  | 20  | YATWSMYRQF NA  | NA |
| 15  | 18  | YATWSMSYEY NA  | NA |
| 38  | 54  | YATWSMIAAH NA  | NA |
| 66  | 50  | PKYLAYTMVA NA  | NA |
| 37  | 48  | TMYFAYTMVA NA  | NA |
| 113 | 140 | HFGQNLTFLA NA  | NA |
| 42  | 39  | TRSYPLTRSG NA  | NA |
| 84  | 83  | LRSYPLTRAF NA  | NA |
| 42  | 41  | PFSYPLTRLA NA  | NA |
| 90  | 119 | QSYPLTRLW NA   | NA |
| 73  | 80  | QDSYPLTRAQ NA  | NA |
| 130 | 144 | NWSYPLTRAL NA  | NA |
| 36  | 42  | IASYPLTREQ NA  | NA |
| 61  | 78  | PHSYPLTRGT NA  | NA |
| 60  | 75  | RYSYPLTRGL NA  | NA |
| 40  | 55  | NKSYPLTRKG NA  | NA |
| 53  | 56  | YTSYPLTRLL NA  | NA |
| 42  | 42  | VDGMQLLATK NA  | NA |
| 70  | 103 | QHVYNLVRVR NA  | NA |
| 76  | 83  | VPGFRLKWNL NA  | NA |
| 15  | 21  | WWWFRLKWNL NA  | NA |
| 66  | 60  | QDFYRLVMTY NA  | NA |

|     |                   |    |
|-----|-------------------|----|
| 32  | 45 VASFRLMYER NA  | NA |
| 68  | 121 MPGSRLMYER NA | NA |
| 96  | 101 SKPYRLMYER NA | NA |
| 65  | 73 VAISRLWVWH NA  | NA |
| 59  | 88 VAISRLWGLL NA  | NA |
| 50  | 67 CDYFFLVAKA NA  | NA |
| 55  | 46 MNGIFLVAKA NA  | NA |
| 37  | 54 RRPLRILKHS NA  | NA |
| 37  | 25 RRPLRIRGPL NA  | NA |
| 34  | 56 RRPLRILGAS NA  | NA |
| 44  | 52 RRPLRIRGGV NA  | NA |
| 13  | 13 DAGYSLTFNT NA  | NA |
| 76  | 86 VDWWRLLTVGF NA | NA |
| 69  | 72 PTLWRIWRRG NA  | NA |
| 33  | 41 YSPSLIQVRG NA  | NA |
| 31  | 46 YSPSLIVVVT NA  | NA |
| 33  | 24 YSPSLILGKF NA  | NA |
| 38  | 32 YSPSLIQYIK NA  | NA |
| 43  | 79 YSPSLIFDKW NA  | NA |
| 51  | 67 YSPSLIVGER NA  | NA |
| 127 | 169 LPGWPLRARL NA | NA |
| 13  | 22 WNSLNLMLTS NA  | NA |
| 94  | 119 SMGQSLNQRL NA | NA |
| 62  | 74 LTGFSLNQRL NA  | NA |
| 81  | 103 AMGQSLNQRL NA | NA |
| 50  | 65 YDGVSLNQRL NA  | NA |
| 87  | 131 YQGHRLMMGI NA | NA |
| 51  | 66 GRGHRLMMGG NA  | NA |
| 42  | 51 RAGHRLMMGT NA  | NA |
| 53  | 71 KSGQPLHQTK NA  | NA |
| 73  | 76 VAGMPLHQTK NA  | NA |
| 37  | 72 TVSLPLWNEQ NA  | NA |
| 161 | 205 NNWHRLRLAI NA | NA |
| 158 | 223 PYGHRLRLAI NA | NA |
| 107 | 139 ASSQRLRLAI NA | NA |
| 82  | 94 VFPQGMHRIL NA  | NA |
| 67  | 94 SSPLNYIMHQ NA  | NA |
| 43  | 41 SSPLNYWGGR NA  | NA |
| 273 | 373 SSPLNYHRIW NA | NA |
| 28  | 22 SSPLNYYLKQ NA  | NA |
| 48  | 50 SSPLNYKRQR NA  | NA |

|     |                   |    |
|-----|-------------------|----|
| 24  | 25 SSPLNYYARH NA  | NA |
| 77  | 81 SSPLNYHLPQ NA  | NA |
| 61  | 70 NSPMSLLRWS NA  | NA |
| 43  | 43 NSPMSLFDIT NA  | NA |
| 27  | 19 NSPMSLYARI NA  | NA |
| 29  | 25 NSPMSLYRPA NA  | NA |
| 10  | 17 NSPMSLYGPA NA  | NA |
| 14  | 9 NSPMSLQSTY NA   | NA |
| 53  | 52 NSPMSLWGQR NA  | NA |
| 10  | 19 NSPMSLLLTVV NA | NA |
| 78  | 68 SRPLNLSNEK NA  | NA |
| 52  | 63 IRPLNLSGGG NA  | NA |
| 57  | 67 FRPLNLSGNL NA  | NA |
| 39  | 46 RRPLNLSGEH NA  | NA |
| 55  | 62 MRPLNLSKLV NA  | NA |
| 46  | 59 GRPLNLSNAF NA  | NA |
| 74  | 97 FRPLNLSYGW NA  | NA |
| 33  | 29 QRPLNLSGPS NA  | NA |
| 28  | 34 RRPLNLSGIF NA  | NA |
| 38  | 47 TRPLNLSKVV NA  | NA |
| 20  | 22 RRPLNLSREG NA  | NA |
| 10  | 27 ERPFFLFMNI NA  | NA |
| 20  | 33 ERPFFLQGEY NA  | NA |
| 46  | 36 ERPFFLFRTT NA  | NA |
| 43  | 52 HAPSLYMSWA NA  | NA |
| 49  | 66 TQPSPFHMVG NA  | NA |
| 35  | 37 TQPSPFQLHQ NA  | NA |
| 39  | 42 TQPSPFQRNI NA  | NA |
| 137 | 185 TQPSPFWQRL NA | NA |
| 68  | 73 TQPSPFWVIK NA  | NA |
| 23  | 28 QMPLQIMAPG NA  | NA |
| 77  | 83 QMPLQIMDMH NA  | NA |
| 74  | 71 QMPLQIMGVS NA  | NA |
| 63  | 78 QMPLQILMGR NA  | NA |
| 107 | 122 QMPLQIHRTE NA | NA |
| 37  | 56 YHPISLLKAG NA  | NA |
| 102 | 122 YHPISLWGNG NA | NA |
| 61  | 47 YHPISLLNMR NA  | NA |
| 57  | 68 YHPISLQLRT NA  | NA |
| 125 | 156 YHPISLHMGQ NA | NA |
| 45  | 77 YHPISLMNRQ NA  | NA |

|     |     |               |    |
|-----|-----|---------------|----|
| 98  | 98  | YHPISLWKEI NA | NA |
| 67  | 84  | YHPISLWDLH NA | NA |
| 79  | 75  | YHPISLMMGA NA | NA |
| 53  | 79  | YHPISLQGHS NA | NA |
| 42  | 57  | MWVLSLHGGF NA | NA |
| 57  | 56  | MWVLSLWQGH NA | NA |
| 27  | 38  | MWVLSLWMEV NA | NA |
| 24  | 34  | RGPSYYDSH NA  | NA |
| 78  | 87  | RGPSYMYHL NA  | NA |
| 45  | 65  | QRPMDLHDGV NA | NA |
| 19  | 23  | QRPMDLWGGY NA | NA |
| 31  | 30  | QRPMDLLNLF NA | NA |
| 43  | 43  | QRPMDLMYGQ NA | NA |
| 23  | 42  | GHPSPFHLSF NA | NA |
| 5   | 7   | LPPLGFLQTF NA | NA |
| 16  | 29  | LPPLGFYDAT NA | NA |
| 31  | 37  | LPPLGFMGQT NA | NA |
| 44  | 49  | LPPLGFSMLQ NA | NA |
| 19  | 37  | LPPLGFVDSR NA | NA |
| 43  | 65  | LPPLGFMKWL NA | NA |
| 21  | 23  | LPPLGFIVML NA | NA |
| 33  | 33  | LPPLGFWSGG NA | NA |
| 22  | 37  | LPPLGFQLGH NA | NA |
| 30  | 35  | TGPAPMWALS NA | NA |
| 55  | 65  | FGPAPMWYNQ NA | NA |
| 34  | 46  | QGPAPMWYVK NA | NA |
| 38  | 31  | SGPAPMWSSH NA | NA |
| 54  | 91  | WGPAPMWYES NA | NA |
| 22  | 31  | MGPAPMWMVF NA | NA |
| 32  | 33  | KGPAPMWGSF NA | NA |
| 41  | 51  | SGPAPMWDLR NA | NA |
| 23  | 32  | YGPAPMWNNF NA | NA |
| 32  | 26  | VTPIELYSVS NA | NA |
| 38  | 56  | GTPIELYDLW NA | NA |
| 44  | 48  | ATPIELYSNW NA | NA |
| 59  | 92  | CTPIELYDHV NA | NA |
| 40  | 44  | GTPIELYSRT NA | NA |
| 22  | 26  | GTPIELYRSS NA | NA |
| 38  | 47  | VTPIELYNVH NA | NA |
| 43  | 52  | PTPIELYVIG NA | NA |
| 102 | 106 | WTPIELYREW NA | NA |

|     |     |               |    |
|-----|-----|---------------|----|
| 28  | 52  | GTPIELYGSS NA | NA |
| 41  | 51  | MGPWFMQSNG NA | NA |
| 51  | 84  | MGPWFMKGTI NA | NA |
| 45  | 55  | MGPWFMMGWF NA | NA |
| 23  | 25  | MGPWFMQSSK NA | NA |
| 37  | 50  | MGPWFMLAK NA  | NA |
| 66  | 77  | MGPWFMKNSA NA | NA |
| 40  | 46  | SLPLLLKQKG NA | NA |
| 26  | 37  | SLPLLLSLGS NA | NA |
| 17  | 15  | SLPLLLKDSH NA | NA |
| 82  | 85  | SLPLLLWSLY NA | NA |
| 50  | 55  | SLPLLLYGTR NA | NA |
| 35  | 38  | SLPLLLKAAY NA | NA |
| 41  | 49  | SLPLLLYGSF NA | NA |
| 91  | 96  | SNPFKYHSGY NA | NA |
| 75  | 62  | SNPFKYWGGA NA | NA |
| 81  | 93  | SNPFKYSAEV NA | NA |
| 22  | 31  | SNPFKYTGSR NA | NA |
| 62  | 88  | SNPFKYWGRW NA | NA |
| 46  | 53  | SNPFKYMLPH NA | NA |
| 15  | 24  | SNPFKYTDSS NA | NA |
| 8   | 5   | SNPFKYFSWR NA | NA |
| 111 | 120 | SNPFKYQKLR NA | NA |
| 64  | 93  | SNPFKYASY NA  | NA |
| 63  | 62  | SNPFKYQKPS NA | NA |
| 100 | 110 | KHPYKYYQLY NA | NA |
| 145 | 195 | KHPYKYMQVH NA | NA |
| 80  | 98  | KHPYKYMSGT NA | NA |
| 79  | 118 | KHPYKYYAGT NA | NA |
| 146 | 206 | KHPYKYMQWK NA | NA |
| 25  | 41  | SKPWKLWGSV NA | NA |
| 79  | 97  | SKPWKLMNTL NA | NA |
| 70  | 77  | FDVWMLYSAL NA | NA |
| 25  | 29  | FDVWMLYMAG NA | NA |
| 55  | 75  | SQPMAYYAGT NA | NA |
| 53  | 58  | SQPMAYTVQV NA | NA |
| 41  | 58  | SQPMAYQGSV NA | NA |
| 49  | 62  | SQPMAYRGNI NA | NA |
| 212 | 272 | SQPMAYMYWH NA | NA |
| 48  | 54  | SQPMAYYLLQ NA | NA |
| 66  | 95  | SQPMAYTKMW NA | NA |

|     |                   |    |
|-----|-------------------|----|
| 237 | 321 SQPMAYHYRV NA | NA |
| 44  | 44 SQPMAYQLQA NA  | NA |
| 81  | 102 SQPMAYQQHH NA | NA |
| 14  | 23 WRPFSYMNVA NA  | NA |
| 27  | 33 WRPFSYFMWG NA  | NA |
| 25  | 29 WRPFSYHDEY NA  | NA |
| 27  | 31 WRPFSYYKMW NA  | NA |
| 3   | 3 WRPFSYFYIF NA   | NA |
| 8   | 7 WRPFSYKQIG NA   | NA |
| 21  | 37 WSPSSYMMMT NA  | NA |
| 65  | 76 WSPSSYMGIV NA  | NA |
| 53  | 62 WSPSSYYYSV NA  | NA |
| 31  | 56 WSPSSYMLHI NA  | NA |
| 22  | 40 NGPYNLMKTH NA  | NA |
| 21  | 19 NGPYNLMGKV NA  | NA |
| 20  | 31 RLPINLYLQR NA  | NA |
| 71  | 88 MGPWGMVMLF NA  | NA |
| 50  | 64 MGPWGMLVHA NA  | NA |
| 85  | 88 MGPWGMVLR NA   | NA |
| 113 | 131 YSAIPLWMGR NA | NA |
| 49  | 59 KSAIPLWDTV NA  | NA |
| 103 | 118 KSAIPLWLGK NA | NA |
| 63  | 62 TSAIPLWKIF NA  | NA |
| 43  | 64 GSAIPLWGGF NA  | NA |
| 46  | 72 NSAIPLWKGA NA  | NA |
| 68  | 72 SSAIPLWQHR NA  | NA |
| 23  | 16 SSAIPLWSGV NA  | NA |
| 34  | 30 TSAIPLWSGG NA  | NA |
| 98  | 125 KSAIPLWRLV NA | NA |
| 32  | 41 DSPLSLFAGQ NA  | NA |
| 37  | 51 DSPLSLLDHQ NA  | NA |
| 99  | 116 DSPLSLHRQW NA | NA |
| 55  | 43 DSPLSLFDGS NA  | NA |
| 69  | 62 YIPLVYQAGV NA  | NA |
| 102 | 121 YIPLVYHSPI NA | NA |
| 106 | 124 YIPLVYYGNW NA | NA |
| 176 | 194 YIPLVYMMRW NA | NA |
| 51  | 69 YIPLVYFDPQ NA  | NA |
| 29  | 46 YIPLVYSGSK NA  | NA |
| 31  | 35 YIPLVYYVRG NA  | NA |
| 58  | 78 HEMPLGLMKHV NA | NA |

|     |     |                |    |
|-----|-----|----------------|----|
| 27  | 27  | HMPLGLYGKT NA  | NA |
| 69  | 78  | HMPLGLMDER NA  | NA |
| 86  | 97  | HMPLGLFSWH NA  | NA |
| 38  | 35  | HMPLGLFKEK NA  | NA |
| 54  | 70  | HMPLGLYDLY NA  | NA |
| 59  | 107 | HMPLGLYGNA NA  | NA |
| 38  | 35  | HMPLGLFSGG NA  | NA |
| 70  | 95  | KFPWNYLYTY NA  | NA |
| 182 | 221 | KFPWNYHGTG NA  | NA |
| 69  | 70  | KFPWNYMAQR NA  | NA |
| 39  | 38  | KFPWNYWGPI NA  | NA |
| 52  | 49  | KFPWNYMMEG NA  | NA |
| 40  | 50  | GRPSPFWNTG NA  | NA |
| 8   | 9   | GRPSPFWAPQ NA  | NA |
| 46  | 55  | WRPSPFWKRI NA  | NA |
| 42  | 50  | VRPSPFWSTG NA  | NA |
| 80  | 86  | RRPSPFWQAK NA  | NA |
| 60  | 55  | KRPSPFWMAS NA  | NA |
| 81  | 134 | CRPSPFWRMS NA  | NA |
| 29  | 21  | GRPSPFWASA NA  | NA |
| 131 | 135 | CRPSPFWQHG NA  | NA |
| 65  | 74  | CRPSPFWSWG NA  | NA |
| 44  | 56  | RQPFL LHNG NA  | NA |
| 23  | 22  | RQPFL LFQSF NA | NA |
| 64  | 107 | RQPFL LHGHI NA | NA |
| 22  | 13  | RQPFL LHQPK NA | NA |
| 38  | 45  | RQPFL LFYIL NA | NA |
| 30  | 43  | RQPFL LYAGI NA | NA |
| 81  | 92  | SSPLALHDPF NA  | NA |
| 31  | 39  | SSPLALMKAI NA  | NA |
| 26  | 31  | SSPLALQVSI NA  | NA |
| 44  | 56  | SSPLALFRIL NA  | NA |
| 79  | 81  | RLPYPLWNG NA   | NA |
| 71  | 73  | RLPYPLYKSW NA  | NA |
| 204 | 255 | RLPYPLMMRW NA  | NA |
| 19  | 13  | LMALNFYSGY NA  | NA |
| 42  | 66  | TNALNFYSVK NA  | NA |
| 44  | 31  | GWALNFYSMA NA  | NA |
| 26  | 24  | NPALNFYSNA NA  | NA |
| 8   | 18  | VDALNFYSGY NA  | NA |
| 33  | 38  | PWALNFYSIY NA  | NA |



|     |     |               |    |
|-----|-----|---------------|----|
| 17  | 20  | KFALNFYSLF NA | NA |
| 12  | 11  | YAALNFYSSR NA | NA |
| 23  | 33  | DDALNFYSQQ NA | NA |
| 2   | 0   | LRALNFYSGY NA | NA |
| 17  | 17  | FIPFPFLRAG NA | NA |
| 50  | 52  | FIPPFMDMI NA  | NA |
| 97  | 147 | FIPPFWNPH NA  | NA |
| 47  | 51  | FIPPFKLS NA   | NA |
| 19  | 26  | FIPPFKGLT NA  | NA |
| 54  | 70  | FIPPFGEI NA   | NA |
| 76  | 76  | FIPPFWMIG NA  | NA |
| 56  | 75  | TVPYQLQGEW NA | NA |
| 37  | 40  | TVPYQLQMPI NA | NA |
| 17  | 10  | TVPYQLMQAT NA | NA |
| 61  | 64  | TVPYQLWYLT NA | NA |
| 32  | 55  | TVPYQLFKKG NA | NA |
| 37  | 48  | KSPSLYMGRR NA | NA |
| 28  | 53  | KSPSLYMQGR NA | NA |
| 37  | 41  | DNPMFLWTIY NA | NA |
| 6   | 8   | QPPMFLWTTI NA | NA |
| 47  | 60  | LRPMFLWTGI NA | NA |
| 94  | 98  | NKPMFLWTGQ NA | NA |
| 72  | 84  | NIPMFLWTHT NA | NA |
| 46  | 50  | WHPMFLWTIW NA | NA |
| 73  | 95  | SQPMFLWTLG NA | NA |
| 38  | 54  | GYPMFLWTMV NA | NA |
| 50  | 78  | YSPMFLWTKQ NA | NA |
| 94  | 112 | MQPMFLWTHY NA | NA |
| 252 | 302 | YSPMDYHMQI NA | NA |
| 143 | 154 | YSPMDYMHY NA  | NA |
| 60  | 56  | YSPMDYGGQ NA  | NA |
| 85  | 103 | YSPMDYIYWG NA | NA |
| 56  | 80  | YSPMDYWVAH NA | NA |
| 47  | 43  | YSPMDYINAA NA | NA |
| 39  | 46  | YSPMDYKGGK NA | NA |
| 130 | 162 | IGALALHKHH NA | NA |
| 53  | 72  | IGALALSSGV NA | NA |
| 38  | 47  | IGALALYNVG NA | NA |
| 32  | 32  | DDAFNLYSWH NA | NA |
| 22  | 22  | QTAFNLYSAT NA | NA |
| 28  | 27  | DPAFNLYSVG NA | NA |

|     |     |            |    |    |
|-----|-----|------------|----|----|
| 65  | 89  | AFAFNLYSRL | NA | NA |
| 70  | 88  | IKAFNLYSVH | NA | NA |
| 11  | 16  | HHAFNLYSKG | NA | NA |
| 1   | 2   | RRAFNLYSGH | NA | NA |
| 32  | 28  | GRAFNLYSGK | NA | NA |
| 18  | 32  | FTAFNLYSES | NA | NA |
| 21  | 29  | QRAFNLYSPA | NA | NA |
| 44  | 67  | WMPLGMHGGI | NA | NA |
| 90  | 93  | WMPLGMKKPG | NA | NA |
| 121 | 124 | WMPLGMKLWR | NA | NA |
| 48  | 67  | WMPLGMMREA | NA | NA |
| 59  | 63  | WMPLGMHMGK | NA | NA |
| 57  | 70  | WMPLGMMQMV | NA | NA |
| 85  | 94  | WMPLGMQLHR | NA | NA |
| 44  | 41  | REPLTLLMNH | NA | NA |
| 22  | 29  | REPLTLLNLG | NA | NA |
| 65  | 95  | REPLTLHQIH | NA | NA |
| 14  | 17  | REPLTLAAG  | NA | NA |
| 41  | 46  | REPLTLYKGG | NA | NA |
| 66  | 83  | REPLTLWGNW | NA | NA |
| 24  | 26  | HYPLNSMYP  | NA | NA |
| 53  | 47  | HYPLNSYGPA | NA | NA |
| 48  | 67  | HYPLNSMQTL | NA | NA |
| 41  | 30  | GNPYKLKLT  | NA | NA |
| 12  | 20  | GNPYKLLKKN | NA | NA |
| 40  | 62  | PFAWSLHLA  | NA | NA |
| 76  | 101 | LFAWSLHVGT | NA | NA |
| 115 | 124 | MFAWSLHAHS | NA | NA |
| 97  | 107 | IFAWSLHNRT | NA | NA |
| 114 | 103 | TFAWSLHRLH | NA | NA |
| 105 | 129 | DFAWSLHAGF | NA | NA |
| 117 | 146 | PFAWSLHVAK | NA | NA |
| 93  | 121 | PFAWSLHLLG | NA | NA |
| 75  | 75  | GFAWSLHMTF | NA | NA |
| 18  | 20  | HAPLNFSMPI | NA | NA |
| 31  | 37  | HAPLNFSRES | NA | NA |
| 63  | 73  | HAPLNFGVHR | NA | NA |
| 42  | 69  | HAPLNFHMVG | NA | NA |
| 34  | 51  | HAPLNFVDHF | NA | NA |
| 89  | 98  | HAPLNFHKWA | NA | NA |
| 50  | 76  | HAPLNFQVTK | NA | NA |

|     |     |                 |    |
|-----|-----|-----------------|----|
| 113 | 131 | HAPLNFSYHR NA   | NA |
| 14  | 23  | HAPLNFWLVI NA   | NA |
| 56  | 72  | QGPWHIYNWK NA   | NA |
| 46  | 74  | QGPWHIWGHI NA   | NA |
| 100 | 103 | QGPWHIMYWG NA   | NA |
| 52  | 80  | SQPIHMYKIW NA   | NA |
| 90  | 115 | SQPIHMYGQI NA   | NA |
| 42  | 65  | SQPIHMHLVI NA   | NA |
| 86  | 112 | SQPIHMHVVG NA   | NA |
| 72  | 97  | SQPIHMHKEA NA   | NA |
| 101 | 87  | SQPIHMWQLS NA   | NA |
| 15  | 10  | YAPYPLWKVV NA   | NA |
| 85  | 112 | INPYPLWKHR NA   | NA |
| 51  | 61  | KKPYPLWKEI NA   | NA |
| 138 | 190 | VWPYPLWKRW NA   | NA |
| 80  | 95  | LRPYPLWKVI NA   | NA |
| 45  | 49  | GDPYPLWKAL NA   | NA |
| 87  | 105 | QYPYPLWKPL NA   | NA |
| 116 | 144 | VHPYPLWKSQ NA   | NA |
| 86  | 90  | VWPYPLWKGT NA   | NA |
| 48  | 66  | EWPYPLWKNY NA   | NA |
| 22  | 29  | GFPLMLFQKS NA   | NA |
| 23  | 28  | GFPLMLQRTF NA   | NA |
| 47  | 48  | GFPLMLHRMA NA   | NA |
| 8   | 9   | GFPLMLMLQG NA   | NA |
| 24  | 47  | GFPLMLFGPF NA   | NA |
| 74  | 73  | IYPMALS RGA NA  | NA |
| 45  | 64  | RRPMALSRRK NA   | NA |
| 99  | 112 | NTPMALS R KW NA | NA |
| 81  | 125 | CPPMALSRRH NA   | NA |
| 63  | 70  | CFPMALSRTG NA   | NA |
| 70  | 73  | PMPMALS RSA NA  | NA |
| 106 | 111 | DRPMALSRTV NA   | NA |
| 45  | 45  | YPPMALSREA NA   | NA |
| 48  | 65  | KPPMALSRTI NA   | NA |
| 79  | 109 | QKPMALSRTQ NA   | NA |
| 41  | 32  | VKPWALMMEG NA   | NA |
| 12  | 18  | VKPWALQVKS NA   | NA |
| 32  | 40  | FGPYAMFNPG NA   | NA |
| 51  | 50  | FGPYAMVMPA NA   | NA |
| 44  | 36  | FGPYAMKAGG NA   | NA |

|     |     |               |    |
|-----|-----|---------------|----|
| 36  | 30  | FGPYAMLQGS NA | NA |
| 43  | 60  | FGPYAMQRNI NA | NA |
| 46  | 65  | FGPYAMYGIT NA | NA |
| 50  | 59  | RPPLAFMRSV NA | NA |
| 85  | 103 | RPPLAFLKWR NA | NA |
| 32  | 44  | RPPLAFMDKS NA | NA |
| 58  | 47  | RPPLAFWGRF NA | NA |
| 36  | 63  | RPPLAFQLKF NA | NA |
| 23  | 62  | RPPLAFKAMI NA | NA |
| 54  | 51  | TPYHIHKET NA  | NA |
| 57  | 59  | TPYHIMRHS NA  | NA |
| 49  | 49  | TYPWLSGEH NA  | NA |
| 84  | 102 | FYPWLSLMG NA  | NA |
| 92  | 100 | YYPWLSQHL NA  | NA |
| 52  | 66  | CYPWLSYEY NA  | NA |
| 61  | 54  | EYPWLSKVA NA  | NA |
| 139 | 161 | IYPWLSRGR NA  | NA |
| 28  | 37  | LYPWLSAPF NA  | NA |
| 42  | 48  | GYPWLSDNR NA  | NA |
| 142 | 157 | AYPWLSRHH NA  | NA |
| 11  | 20  | FAPWGIHDLT NA | NA |
| 19  | 32  | DAPWGIHKKY NA | NA |
| 6   | 9   | EAPWGIHKMG NA | NA |
| 21  | 21  | MAPWGIHSST NA | NA |
| 19  | 17  | KAPWGIHVEG NA | NA |
| 30  | 48  | TAPWGIHDQL NA | NA |
| 38  | 27  | PAPWGIHLIA NA | NA |
| 60  | 74  | DAPWGIHGMH NA | NA |
| 140 | 169 | SAPWGIHLHG NA | NA |
| 88  | 115 | FNPIHLHYQQ NA | NA |
| 80  | 107 | NSPLSYMAWQ NA | NA |
| 21  | 29  | NSPLSYLQHQ NA | NA |
| 7   | 8   | NSPLSYFGSI NA | NA |
| 46  | 45  | NSPLSYWDMS NA | NA |
| 27  | 27  | NSPLSYKYPV NA | NA |
| 24  | 44  | NSPLSYWAGT NA | NA |
| 35  | 28  | NSPLSYKGRH NA | NA |
| 41  | 41  | NSPLSYQDRL NA | NA |
| 141 | 170 | NSPLSYHANV NA | NA |
| 25  | 48  | NSPLSYRDII NA | NA |
| 26  | 32  | VFPMSLFLSH NA | NA |

|     |     |               |    |
|-----|-----|---------------|----|
| 63  | 79  | VFPMSLHQLS NA | NA |
| 66  | 54  | VFPMSLQSNL NA | NA |
| 47  | 66  | VFPMSLMMQI NA | NA |
| 60  | 63  | VFPMSLKLTA NA | NA |
| 58  | 72  | VFPMSLWLWS NA | NA |
| 129 | 142 | VFPMSLYQHA NA | NA |
| 39  | 33  | RLPWSLYNAG NA | NA |
| 16  | 21  | RLPWSLQQAG NA | NA |
| 41  | 45  | RLPWSLFQQH NA | NA |
| 60  | 68  | RLPWSLWLLS NA | NA |
| 99  | 112 | RLPWSLYAHR NA | NA |
| 70  | 89  | RLPWSLSSLL NA | NA |
| 80  | 84  | TFPFMLWAMV NA | NA |
| 22  | 26  | TFPFMLMGAG NA | NA |
| 82  | 85  | TFPFMLWRSQ NA | NA |
| 12  | 8   | TFPFMLMQGG NA | NA |
| 48  | 70  | TFPFMLFGMI NA | NA |
| 72  | 92  | HHPLFLWATP NA | NA |
| 46  | 51  | RTPIGIYYTI NA | NA |
| 27  | 38  | RTPIGIYLS NA  | NA |
| 24  | 23  | RTPIGIYASG NA | NA |
| 28  | 20  | SYALHLWGML NA | NA |
| 35  | 46  | RAPLHMVSQL NA | NA |
| 75  | 66  | RAPLHMMNHG NA | NA |
| 33  | 38  | RAPLHMFSKS NA | NA |
| 67  | 66  | RAPLHMHLER NA | NA |
| 71  | 108 | RAPLHMHGGS NA | NA |
| 20  | 16  | RTPMAMLGAV NA | NA |
| 60  | 60  | RTPMAMHYWG NA | NA |
| 32  | 36  | RTPMAMLANI NA | NA |
| 31  | 37  | RTPMAMIGMG NA | NA |
| 41  | 26  | RTPMAMSGVY NA | NA |
| 30  | 32  | RTPMAMMGKI NA | NA |
| 11  | 9   | RTPMAMTQLG NA | NA |
| 31  | 53  | RTPMAMYVRF NA | NA |
| 41  | 34  | RTPMAMINRG NA | NA |
| 72  | 67  | EHAWNLYQGY NA | NA |
| 54  | 72  | EHAWNLSVT NA  | NA |
| 23  | 24  | TVPQMIHGTS NA | NA |
| 58  | 48  | TVPQMIMQTF NA | NA |
| 58  | 59  | TVPQMIFRIR NA | NA |

|     |                   |    |
|-----|-------------------|----|
| 30  | 33 TVPQMIHAIG NA  | NA |
| 61  | 62 WDALGISGMY NA  | NA |
| 61  | 66 WDALGIMMHS NA  | NA |
| 45  | 48 WDALGISDGH NA  | NA |
| 130 | 158 WDALGIMYRH NA | NA |
| 35  | 63 WDALGIWKGS NA  | NA |
| 65  | 58 SEPFGLSAWG NA  | NA |
| 24  | 25 SEPFGLMAPQ NA  | NA |
| 51  | 53 SEPFGLLNPV NA  | NA |
| 28  | 44 SEPFGLQGLI NA  | NA |
| 71  | 71 SEPFGLLLRS NA  | NA |
| 46  | 55 SEPFGLQLIW NA  | NA |
| 31  | 51 SEPFGLFGKT NA  | NA |
| 25  | 31 SMVFSIYRQS NA  | NA |
| 17  | 27 PMVFSIYKGI NA  | NA |
| 29  | 35 RMVFSIYK GK NA | NA |
| 49  | 45 EMVFSIYQVK NA  | NA |
| 50  | 56 QMVFSIYRIW NA  | NA |
| 33  | 43 QMVFSIYAIG NA  | NA |
| 18  | 13 TMVFSIYGTL NA  | NA |
| 16  | 24 AMVFSIYVQA NA  | NA |
| 13  | 22 IMVFSIYGKT NA  | NA |
| 21  | 13 WMVFSIYYWQ NA  | NA |
| 26  | 25 FMVFSIYMAA NA  | NA |
| 21  | 31 GEVFSLWGQV NA  | NA |
| 9   | 8 GEVFSLHDVA NA   | NA |
| 13  | 18 GEVFSLMARA NA  | NA |
| 13  | 22 GEVFSLWYPS NA  | NA |
| 15  | 32 GEVFSLMGMW NA  | NA |
| 19  | 19 GEVFSLWGKT NA  | NA |
| 37  | 28 GEVFSLMRAL NA  | NA |
| 81  | 138 GLPMHLYLGT NA | NA |
| 20  | 26 SRAYSLMNTN NA  | NA |
| 12  | 26 SRAYSLFKGR NA  | NA |
| 62  | 64 SRAYSLSLLA NA  | NA |
| 42  | 51 SRAYSLFVPF NA  | NA |
| 27  | 30 SRAYSLFNTG NA  | NA |
| 35  | 51 LTPMQLYMES NA  | NA |
| 39  | 53 ITPMQLYSVT NA  | NA |
| 58  | 62 QTPMQLYSRK NA  | NA |
| 27  | 28 PTPMQLYRGG NA  | NA |

|     |     |            |    |    |
|-----|-----|------------|----|----|
| 38  | 53  | MTPMQLYGST | NA | NA |
| 48  | 57  | VTPMQLYNGQ | NA | NA |
| 209 | 266 | MTPMQLYMHK | NA | NA |
| 62  | 70  | ETPMQLYYRY | NA | NA |
| 41  | 41  | MTPMQLYGAF | NA | NA |
| 82  | 91  | FDAQSLWVAR | NA | NA |
| 18  | 23  | APVLALMGQK | NA | NA |
| 50  | 68  | AKVMSLWAWY | NA | NA |
| 50  | 55  | AKVMSLYQMR | NA | NA |
| 73  | 69  | AKVMSLHGQQ | NA | NA |
| 43  | 45  | AKVMSLWLVW | NA | NA |
| 40  | 51  | ETMLALMRLF | NA | NA |
| 30  | 34  | ETMLALMLLK | NA | NA |
| 61  | 64  | ETMLALWYES | NA | NA |
| 42  | 51  | ETMLALMGGF | NA | NA |
| 58  | 49  | ETMLALMQLW | NA | NA |
| 37  | 46  | HSPWFLYYLK | NA | NA |
| 51  | 50  | HSPWFLWGPL | NA | NA |
| 3   | 8   | HSPWFLQLSK | NA | NA |
| 1   | 4   | HSPWFLFNKG | NA | NA |
| 31  | 49  | HSPWFLHGMG | NA | NA |
| 37  | 53  | FSQLAMWGMG | NA | NA |
| 91  | 85  | FSQLAMHVKH | NA | NA |
| 35  | 30  | FSQLAMWKSJ | NA | NA |
| 42  | 64  | GLAWGLYNAT | NA | NA |
| 82  | 99  | MLAWGLYMKL | NA | NA |
| 53  | 75  | PLAWGLYGEA | NA | NA |
| 107 | 154 | CLAWGLYYGA | NA | NA |
| 105 | 138 | ALAWGLYNHG | NA | NA |
| 5   | 8   | WLAWGLYLTF | NA | NA |
| 110 | 104 | DLAWGLYGLG | NA | NA |
| 103 | 137 | PLAWGLYGGW | NA | NA |
| 77  | 101 | TLAWGLYGNA | NA | NA |
| 91  | 109 | NLAWGLYQEW | NA | NA |
| 20  | 15  | SPPLALMAGV | NA | NA |
| 36  | 52  | SPPLALKRTV | NA | NA |
| 40  | 57  | SPPLALLYLG | NA | NA |
| 22  | 39  | SPPLALLSAH | NA | NA |
| 33  | 42  | SPPLALKQVT | NA | NA |
| 55  | 71  | KSPLGLMYNA | NA | NA |
| 37  | 40  | KSPLGLYLMG | NA | NA |

|     |     |             |    |    |
|-----|-----|-------------|----|----|
| 38  | 42  | VKVFSMWQRQ  | NA | NA |
| 16  | 19  | VKVFSMFRVS  | NA | NA |
| 32  | 33  | VKVFSMHVWV  | NA | NA |
| 13  | 10  | VKVFSMWSMT  | NA | NA |
| 96  | 113 | KMVYMLHMMV  | NA | NA |
| 14  | 7   | RAPSMLWSNT  | NA | NA |
| 44  | 46  | RAPSMLYLWG  | NA | NA |
| 17  | 32  | RAPSMLMVEL  | NA | NA |
| 15  | 14  | RAPSMLWAI I | NA | NA |
| 15  | 23  | RAPSMLYKMS  | NA | NA |
| 60  | 76  | SLVLNMWLNL  | NA | NA |
| 54  | 76  | SLVLNMWAWK  | NA | NA |
| 29  | 25  | RFALNLYSWT  | NA | NA |
| 80  | 81  | GGPSMLMYWH  | NA | NA |
| 29  | 34  | GGPSMLMVT S | NA | NA |
| 39  | 41  | PGPIPLWRSY  | NA | NA |
| 51  | 42  | GGPIPLWDEY  | NA | NA |
| 54  | 77  | CGPIPLWYKA  | NA | NA |
| 79  | 74  | FGPIPLWGVY  | NA | NA |
| 49  | 65  | KGPIPLWAWG  | NA | NA |
| 69  | 73  | QGPIPLWLRG  | NA | NA |
| 33  | 50  | DGPIPLWGVY  | NA | NA |
| 43  | 58  | YGPIPLWAVG  | NA | NA |
| 44  | 45  | GGPIPLWLVG  | NA | NA |
| 56  | 81  | RNGLALSVHL  | NA | NA |
| 56  | 63  | RNGLALSGWR  | NA | NA |
| 48  | 56  | SIAFALWCTL  | NA | NA |
| 18  | 18  | SIAFALFLIL  | NA | NA |
| 45  | 66  | SIAFALMNWV  | NA | NA |
| 112 | 122 | SIAFALYQHW  | NA | NA |
| 74  | 92  | SIAFALYQAV  | NA | NA |
| 16  | 33  | SIAFALWAPF  | NA | NA |
| 51  | 76  | SIAFALLKPR  | NA | NA |
| 37  | 40  | SIAFALYNLI  | NA | NA |
| 48  | 56  | ALPYALYDQA  | NA | NA |
| 88  | 91  | PLPYALYLSW  | NA | NA |
| 35  | 41  | TLPYALYSPI  | NA | NA |
| 167 | 204 | DLPYALYDHH  | NA | NA |
| 52  | 63  | RLPYALYYVK  | NA | NA |
| 74  | 68  | YLPYALYGRL  | NA | NA |
| 37  | 52  | GLPYALYVSF  | NA | NA |



|     |                   |    |
|-----|-------------------|----|
| 64  | 75 GLPYALYQMS NA  | NA |
| 89  | 80 ALPYALYAEK NA  | NA |
| 41  | 56 NLPYALYGIT NA  | NA |
| 89  | 116 RRVLMMKGHW NA | NA |
| 29  | 48 RRVLMMLSKR NA  | NA |
| 84  | 127 RRVLMMLRWA NA | NA |
| 42  | 60 RRVLMMSVQ NA   | NA |
| 46  | 61 RRVLMMSGPR NA  | NA |
| 28  | 33 RRVLMFMFW NA   | NA |
| 34  | 50 RRVLMHSMI NA   | NA |
| 26  | 52 IPAFNLLNHA NA  | NA |
| 42  | 43 IPAFNLMATW NA  | NA |
| 38  | 36 IPAFNLHKMW NA  | NA |
| 14  | 28 IPAFNLYYFY NA  | NA |
| 1   | 3 IPAFNLYYGS NA   | NA |
| 21  | 21 IPAFNLLQOY NA  | NA |
| 26  | 40 IPAFNLSRPT NA  | NA |
| 36  | 39 IPAFNLYLET NA  | NA |
| 67  | 88 TNPIMLKGIK NA  | NA |
| 61  | 81 TNPIMLSKAI NA  | NA |
| 44  | 38 TNPIMLMGMG NA  | NA |
| 44  | 45 TNPIMLMAKW NA  | NA |
| 44  | 40 STVFHMHGPA NA  | NA |
| 51  | 66 STVFHMHQGS NA  | NA |
| 43  | 66 AFPQSLMKWT NA  | NA |
| 64  | 73 HFPQSLMMKG NA  | NA |
| 36  | 71 VFPQSLMAAT NA  | NA |
| 51  | 78 IFPQSLMGGR NA  | NA |
| 18  | 25 QFPQSLMYHK NA  | NA |
| 47  | 36 DFPQSLMNIA NA  | NA |
| 42  | 46 GFPQSLMATS NA  | NA |
| 29  | 34 MFPQSLMDAY NA  | NA |
| 59  | 60 KFPQSLMVLY NA  | NA |
| 48  | 60 AGPQPLYVPL NA  | NA |
| 28  | 27 AGPQPLYQKA NA  | NA |
| 214 | 282 TIPFYMHGPA NA | NA |
| 63  | 67 TIPFYMMSAI NA  | NA |
| 79  | 106 TIPFYMVMHG NA | NA |
| 47  | 47 TIPFYMRSGK NA  | NA |
| 81  | 76 TIPFYMVVGK NA  | NA |
| 98  | 88 TIPFYMFYPR NA  | NA |

|     |                   |    |
|-----|-------------------|----|
| 73  | 75 TIPFYMYZIA NA  | NA |
| 59  | 72 TIPFYMIGTQ NA  | NA |
| 127 | 155 TIPFYMQYGW NA | NA |
| 108 | 116 TIPFYMVVPW NA | NA |
| 76  | 109 TIPFYMWAWQ NA | NA |
| 130 | 178 EQAWYLYGHR NA | NA |
| 42  | 65 RGPYMLFDRY NA  | NA |
| 72  | 86 RGPYMLLYAQ NA  | NA |
| 33  | 49 RGPYMLHNSS NA  | NA |
| 62  | 64 RGPYMLQGMK NA  | NA |
| 52  | 51 RGPYMLLKQY NA  | NA |
| 56  | 69 RGPYMLYGTV NA  | NA |
| 89  | 86 LPYFSMHMHQ NA  | NA |
| 9   | 12 LPYFSMFKIG NA  | NA |
| 19  | 25 LPYFSMHQOQ NA  | NA |
| 48  | 47 VCPLSLYVSG NA  | NA |
| 50  | 81 FCPLSLYDIY NA  | NA |
| 42  | 63 RCPLSLYGTI NA  | NA |
| 112 | 146 CCPLSLYNWL NA | NA |
| 58  | 65 LCPLSLYNQW NA  | NA |
| 39  | 38 TCPLSLYNGF NA  | NA |
| 35  | 33 LCPLSLYKML NA  | NA |
| 94  | 118 YCPLSLYGMH NA | NA |
| 63  | 83 ACPLSLYKRV NA  | NA |
| 31  | 39 FPVLSLMQPI NA  | NA |
| 59  | 51 FPVLSLMGVK NA  | NA |
| 58  | 83 GCPHMMMQQA NA  | NA |
| 36  | 53 GCPHMMFGPG NA  | NA |
| 85  | 129 GCPHMMHQAS NA | NA |
| 45  | 65 WRPFHLSRQG NA  | NA |
| 99  | 116 CRPFHLSRQV NA | NA |
| 46  | 54 TSPFHLSRMV NA  | NA |
| 88  | 93 QWPFHLSRPH NA  | NA |
| 28  | 46 DFPFHLSRIT NA  | NA |
| 102 | 109 FDPFHLSRLA NA | NA |
| 45  | 31 EIPFHLSRSQ NA  | NA |
| 169 | 265 FKPFHLSRWH NA | NA |
| 116 | 137 NHPFHLSRRF NA | NA |
| 42  | 50 ENPFHLSRAS NA  | NA |
| 15  | 25 AMPLHMMLNS NA  | NA |
| 12  | 19 AMPLHMMSNY NA  | NA |

|     |     |               |    |
|-----|-----|---------------|----|
| 60  | 74  | AMPLMHQRI NA  | NA |
| 34  | 41  | AMPLHMGAW NA  | NA |
| 40  | 64  | AMPLHMWKRT NA | NA |
| 35  | 39  | AMPLHMSVKS NA | NA |
| 53  | 64  | ELMLSMSGQF NA | NA |
| 100 | 124 | ELMLSMHAWG NA | NA |
| 66  | 98  | ELMLSMDGQ NA  | NA |
| 57  | 72  | ELMLSMYMIV NA | NA |
| 43  | 77  | ELMLSMHNRA NA | NA |
| 78  | 87  | ELMLSMSGPH NA | NA |
| 97  | 116 | IEAWSLYGHT NA | NA |
| 97  | 86  | IEAWSLYYMQ NA | NA |
| 53  | 63  | IEAWSLMMPK NA | NA |
| 62  | 88  | IEAWSLLRIY NA | NA |
| 66  | 71  | PRVMLLHYWG NA | NA |
| 38  | 56  | RDVLALMRMV NA | NA |
| 36  | 35  | RDVLALMAMY NA | NA |
| 74  | 83  | GIPFFMTAHH NA | NA |
| 81  | 92  | TIPFFMTVLR NA | NA |
| 69  | 127 | KIPFFMTGKL NA | NA |
| 74  | 44  | AIPFFMTAGK NA | NA |
| 37  | 38  | GIPFFMTQIW NA | NA |
| 24  | 41  | RIPFFMTGPF NA | NA |
| 57  | 70  | AIPFFMTQWF NA | NA |
| 23  | 19  | IIPFFMTMSR NA | NA |
| 35  | 39  | QIPFFMTAPK NA | NA |
| 81  | 63  | RIPFFMTRWG NA | NA |
| 24  | 33  | YIPFFMTQKR NA | NA |
| 96  | 119 | ANPLPQMSRW NA | NA |
| 47  | 62  | QNPLPQMVWF NA | NA |
| 86  | 90  | MNPLPQMMPG NA | NA |
| 55  | 50  | FNPLPQMVVL NA | NA |
| 31  | 46  | FNPLPQMVVI NA | NA |
| 91  | 119 | CNPLPQMLGH NA | NA |
| 45  | 66  | SNPLPQMNAH NA | NA |
| 47  | 70  | QKVLNMWKTF NA | NA |
| 77  | 70  | HRPFGLQLNG NA | NA |
| 38  | 70  | HRPFGLKGNK NA | NA |
| 12  | 10  | HRPFGLQLLQ NA | NA |
| 60  | 54  | HRPFGLSNER NA | NA |
| 102 | 114 | HRPFGLFYQS NA | NA |

|    |     |               |    |
|----|-----|---------------|----|
| 74 | 70  | HRPFGLYDTG NA | NA |
| 57 | 84  | HRPFGLMKLI NA | NA |
| 61 | 108 | HRPFGLSDHG NA | NA |
| 25 | 28  | LQPLTIFLAG NA | NA |
| 53 | 50  | LQPLTIWNHV NA | NA |
| 25 | 33  | RSPLMMYVPY NA | NA |
| 34 | 43  | RSPLMMYNLA NA | NA |
| 16 | 26  | RSPLMMHDNT NA | NA |
| 36 | 62  | RSPLMMVNGG NA | NA |
| 48 | 56  | RSPLMMHVHV NA | NA |
| 35 | 27  | RSPLMMVYKG NA | NA |
| 38 | 61  | RSPLMMLKAW NA | NA |
| 48 | 53  | RSPLMMWAKT NA | NA |
| 33 | 37  | RSPLMMQMET NA | NA |
| 83 | 101 | RSPLMMSLMW NA | NA |
| 47 | 41  | RSPLMMTRGK NA | NA |
| 29 | 32  | ISPMLLKNG NA  | NA |
| 39 | 38  | ISPMLLYQRS NA | NA |
| 45 | 36  | ISPMLLFRLI NA | NA |
| 37 | 28  | ISPMLLQDMK NA | NA |
| 16 | 19  | ISPMLLSGSK NA | NA |
| 12 | 12  | ISPMLLQGPH NA | NA |
| 11 | 29  | ISPMLLQGPV NA | NA |
| 43 | 60  | ISPMLLQLRL NA | NA |
| 20 | 25  | EMPQPLMLPF NA | NA |
| 54 | 71  | CWPLSQSTSS NA | NA |
| 34 | 57  | DRPLSQSTIQ NA | NA |
| 37 | 32  | RMPLSQSTIF NA | NA |
| 39 | 44  | PKPLSQSTSF NA | NA |
| 48 | 60  | YNPLSQSTIR NA | NA |
| 34 | 38  | YPPLSQSTNH NA | NA |
| 31 | 32  | SNPLSQSTEF NA | NA |
| 96 | 111 | AFPLSQSTNW NA | NA |
| 74 | 77  | CIPLSQSTIV NA | NA |
| 67 | 112 | KKPLSQSTIW NA | NA |
| 84 | 109 | EKVMLMMGWT NA | NA |
| 98 | 131 | EKVMLMWAMY NA | NA |
| 15 | 13  | EKVMLMHGPR NA | NA |
| 28 | 34  | KAALPLMGQV NA | NA |
| 36 | 58  | KAALPLWSTR NA | NA |
| 29 | 33  | KAALPLWYGA NA | NA |

|    |     |                |    |
|----|-----|----------------|----|
| 28 | 38  | KAALPLYLGI NA  | NA |
| 37 | 42  | KAALPLMDWS NA  | NA |
| 4  | 5   | TSVLALMQPW NA  | NA |
| 33 | 29  | TSVLALMVGI NA  | NA |
| 32 | 35  | TSVLALYYMF NA  | NA |
| 75 | 81  | FTPLNMIDVW NA  | NA |
| 57 | 49  | FTPLNMLQAR NA  | NA |
| 46 | 48  | FTPLNMYNLT NA  | NA |
| 87 | 75  | FTPLNMQVWW NA  | NA |
| 31 | 29  | FTPLNMQSHG NA  | NA |
| 35 | 31  | FTPLNMKSGG NA  | NA |
| 57 | 75  | FTPLNMIVAV NA  | NA |
| 65 | 68  | FTPLNMYVMK NA  | NA |
| 18 | 26  | TAPINLFYLR NA  | NA |
| 5  | 11  | TAPINLYYGL NA  | NA |
| 4  | 4   | TAPINLFSII NA  | NA |
| 58 | 65  | SYMFSLYMHL NA  | NA |
| 37 | 40  | SYMFSLWRIA NA  | NA |
| 5  | 13  | SYMFSLFSQS NA  | NA |
| 17 | 7   | SYMFSLYMIY NA  | NA |
| 48 | 68  | SYMFSLWKSI NA  | NA |
| 3  | 1   | FAAYSLYQSS NA  | NA |
| 43 | 58  | FAAYSLWGTV NA  | NA |
| 2  | 6   | FAAYSLYKAG NA  | NA |
| 33 | 36  | FAAYSLLYVR NA  | NA |
| 22 | 10  | FAAYSLEFGII NA | NA |
| 16 | 23  | FAAYSLSGER NA  | NA |
| 14 | 13  | YAPGSMHNRV NA  | NA |
| 56 | 79  | SWGLALMSKV NA  | NA |
| 69 | 87  | SWGLALMQNW NA  | NA |
| 83 | 103 | SWGLALMNHF NA  | NA |
| 21 | 35  | RKALNLYYAQ NA  | NA |
| 45 | 59  | RKALNLYKRK NA  | NA |
| 45 | 52  | RRPASYNNL NA   | NA |
| 33 | 28  | RRPASYNMG NA   | NA |
| 58 | 60  | CCAMGLYKLR NA  | NA |
| 38 | 52  | CCAMGLHYNK NA  | NA |
| 56 | 62  | CCAMGLHMAF NA  | NA |
| 99 | 117 | MTPLGIFYLA NA  | NA |
| 56 | 61  | AHPLGIFYTF NA  | NA |
| 78 | 90  | EFPLGIFYMY NA  | NA |

|     |                   |    |
|-----|-------------------|----|
| 53  | 70 AAPLGIFYLI NA  | NA |
| 101 | 133 NYPLGIFYEW NA | NA |
| 73  | 112 CWPLGIFYRI NA | NA |
| 83  | 90 LFPLGIFYQY NA  | NA |
| 27  | 33 GPPLGIFYTW NA  | NA |
| 28  | 31 RAPLGIFYLH NA  | NA |
| 53  | 65 TFPLGIFYGV NA  | NA |
| 70  | 82 LMPLGIFYWI NA  | NA |
| 113 | 95 FRALAMQGGV NA  | NA |
| 59  | 93 DRALAMQVLH NA  | NA |
| 46  | 61 FRALAMQDKL NA  | NA |
| 31  | 46 HRALAMQVWF NA  | NA |
| 42  | 41 MRALAMQKPY NA  | NA |
| 34  | 52 SRALAMQKMK NA  | NA |
| 68  | 66 YRALAMQMNW NA  | NA |
| 79  | 118 MRALAMQGQF NA | NA |
| 69  | 82 KRALAMQNGG NA  | NA |
| 32  | 53 CRALAMQRVK NA  | NA |
| 32  | 31 QRALAMQRGV NA  | NA |
| 8   | 4 VPPMPLMLMG NA   | NA |
| 33  | 41 VPPMPLMKVI NA  | NA |
| 54  | 54 VPPMPLMKQH NA  | NA |
| 62  | 58 VPPMPLLKLI NA  | NA |
| 45  | 61 VPPMPLSKWS NA  | NA |
| 13  | 17 VPPMPLMQNA NA  | NA |
| 22  | 28 SSPLYLSNAA NA  | NA |
| 43  | 31 SSPLYLKMVI NA  | NA |
| 46  | 65 SSPLYLWGPL NA  | NA |
| 59  | 67 SSPLYLMYVH NA  | NA |
| 39  | 65 SSPLYLWGQV NA  | NA |
| 22  | 27 SSPLYLMSTS NA  | NA |
| 39  | 41 SSPLYLSRGK NA  | NA |
| 22  | 43 RTPLMLWSIV NA  | NA |
| 97  | 113 RTPLMLKQRR NA | NA |
| 29  | 32 RTPLMLWKES NA  | NA |
| 16  | 32 RTPLMLQLGF NA  | NA |
| 33  | 25 RTPLMLQRAS NA  | NA |
| 36  | 51 RTPLMLSYLA NA  | NA |
| 23  | 40 RTPLMLWRRG NA  | NA |
| 53  | 37 RTPLMLWGNH NA  | NA |
| 40  | 56 RYPWALMKGS NA  | NA |

|    |    |               |    |
|----|----|---------------|----|
| 26 | 21 | ESQMIHKIK NA  | NA |
| 40 | 55 | ESQMIYMKH NA  | NA |
| 67 | 66 | ESQMIWYIQ NA  | NA |
| 22 | 21 | ESQMIMAMR NA  | NA |
| 11 | 18 | ESQMIYGGI NA  | NA |
| 52 | 64 | VFALNLHQWY NA | NA |
| 46 | 50 | VFALNLWQVV NA | NA |
| 82 | 93 | VFALNLHQAK NA | NA |
| 91 | 79 | VFALNLHMGL NA | NA |
| 32 | 49 | WLAQALWYGT NA | NA |
| 29 | 44 | VYAFSLMRPS NA | NA |
| 23 | 25 | SRAFSLMRAS NA | NA |
| 46 | 69 | QDAFSLMRTL NA | NA |
| 66 | 65 | CDAFSLMRNG NA | NA |
| 52 | 63 | PWAFSLMRHF NA | NA |
| 14 | 27 | SPAFSLMRNG NA | NA |
| 23 | 42 | CWAFSLMRKT NA | NA |
| 51 | 54 | VHAFSLMRGT NA | NA |
| 47 | 79 | WFAFSLMRES NA | NA |
| 46 | 65 | SKAFSLMRQQ NA | NA |
| 48 | 44 | QFAFSLMRGR NA | NA |
| 85 | 84 | DVAFHLWVQT NA | NA |
| 30 | 34 | DVAFHLYKRG NA | NA |
| 63 | 95 | DVAFHLYGVY NA | NA |
| 40 | 41 | QAAFHLMQGH NA | NA |
| 62 | 60 | QAAFHLYLWT NA | NA |
| 22 | 36 | QAAFHLMGST NA | NA |
| 64 | 68 | QAAFHLWVAV NA | NA |
| 30 | 64 | QAAFHLHGEH NA | NA |
| 56 | 45 | QAAFHLYRVI NA | NA |
| 51 | 65 | QAAFHLWGLR NA | NA |
| 22 | 28 | ESPLSILNPF NA | NA |
| 27 | 33 | ERPLSILNKK NA | NA |
| 27 | 35 | EQPLSILNLS NA | NA |
| 19 | 28 | AFPLSILNES NA | NA |
| 59 | 51 | FWPLSILNML NA | NA |
| 21 | 19 | NDPLSILNGT NA | NA |
| 34 | 28 | RKPLSILNLG NA | NA |
| 54 | 62 | LHPLSILNSG NA | NA |
| 44 | 58 | DDPLSILNEW NA | NA |
| 66 | 75 | LMPLSILNSR NA | NA |

|     |     |             |    |    |
|-----|-----|-------------|----|----|
| 47  | 66  | VTPLYLMSWI  | NA | NA |
| 68  | 84  | VTPLYLYLTR  | NA | NA |
| 66  | 58  | VTPLYLKVLQ  | NA | NA |
| 39  | 36  | VTPLYLKDVS  | NA | NA |
| 63  | 65  | VTPLYLFYSV  | NA | NA |
| 96  | 93  | VTPLYLHYLK  | NA | NA |
| 47  | 55  | VTPLYLFGSH  | NA | NA |
| 51  | 53  | GKPLPWYKKL  | NA | NA |
| 50  | 46  | GKPLPWMQKL  | NA | NA |
| 23  | 31  | GKPLPWLMR   | NA | NA |
| 25  | 33  | GKPLPWLEV   | NA | NA |
| 30  | 31  | GKPLPWLLW   | NA | NA |
| 24  | 42  | GKPLPWSKEA  | NA | NA |
| 50  | 54  | GKPLPWHQWK  | NA | NA |
| 23  | 26  | LPALNMHV GK | NA | NA |
| 36  | 34  | LPALNMHQPF  | NA | NA |
| 23  | 27  | LPALNMYMII  | NA | NA |
| 21  | 17  | LPALNMMVEQ  | NA | NA |
| 63  | 78  | LPALNMSRHV  | NA | NA |
| 59  | 86  | NFPMSLFMMV  | NA | NA |
| 55  | 56  | NFPMSLWVQS  | NA | NA |
| 62  | 76  | NFPMSLWSQL  | NA | NA |
| 30  | 28  | NFPMSLMASV  | NA | NA |
| 59  | 68  | NFPMSLWMPI  | NA | NA |
| 64  | 91  | NFPMSLWGGH  | NA | NA |
| 24  | 33  | HGPMSLFDMG  | NA | NA |
| 40  | 62  | HGPMSLTGLV  | NA | NA |
| 36  | 52  | HGPMSLTSAR  | NA | NA |
| 41  | 78  | HGPMSLFRGL  | NA | NA |
| 85  | 114 | HGPMSLTQHW  | NA | NA |
| 27  | 33  | HGPMSLSGQG  | NA | NA |
| 30  | 46  | HGPMSLTYTK  | NA | NA |
| 53  | 55  | HGPMSLYRKK  | NA | NA |
| 59  | 83  | ANAMNLWSAQ  | NA | NA |
| 48  | 54  | ANAMNLHNPI  | NA | NA |
| 35  | 47  | GTPMALKSLY  | NA | NA |
| 80  | 108 | NFPMALKSQS  | NA | NA |
| 131 | 141 | ADPMALKSNL  | NA | NA |
| 103 | 101 | EFPMALKSQH  | NA | NA |
| 66  | 62  | ATPMALKSVG  | NA | NA |
| 135 | 136 | TYPMALKSMF  | NA | NA |



|    |     |               |    |
|----|-----|---------------|----|
| 38 | 33  | GFPALKSPA NA  | NA |
| 56 | 55  | DKPMALKSEK NA | NA |
| 33 | 53  | WQPMALKSEF NA | NA |
| 51 | 94  | GTPMALKSIG NA | NA |
| 39 | 51  | PPPLALKMGI NA | NA |
| 50 | 83  | SRPLNLSLHT NA | NA |
| 37 | 39  | SRPLNLMVES NA | NA |
| 33 | 40  | SRPLNLWDHR NA | NA |
| 35 | 45  | SRPLNLSKNG NA | NA |
| 38 | 48  | QNPMSLLDGA NA | NA |
| 57 | 54  | DIPMSLLDVG NA | NA |
| 25 | 22  | KDPMSLLDKS NA | NA |
| 41 | 57  | GTPMSLLDWG NA | NA |
| 13 | 31  | QQPMSLLDQQ NA | NA |
| 40 | 53  | VRPMSLLDAG NA | NA |
| 64 | 89  | GNPMSLLDAR NA | NA |
| 28 | 23  | LQPMSLLDAH NA | NA |
| 28 | 35  | WHPMSLLDAG NA | NA |
| 11 | 11  | DAPYFLYYPF NA | NA |
| 17 | 31  | DAPYFLFRKQ NA | NA |
| 26 | 32  | DAPYFLMVRI NA | NA |
| 68 | 82  | YSPMALHRPG NA | NA |
| 67 | 54  | QHPLALHRPG NA | NA |
| 76 | 89  | GFGLALHRPG NA | NA |
| 85 | 100 | TMPYLLQNWL NA | NA |
| 33 | 49  | TMPYLLYDRL NA | NA |
| 24 | 21  | TMPYLLYQPF NA | NA |
| 53 | 64  | TMPYLLLSMS NA | NA |
| 37 | 34  | TMPYLLLDVL NA | NA |
| 70 | 59  | TMPYLLLSVI NA | NA |
| 83 | 107 | TMPYLLHGMT NA | NA |
| 46 | 45  | TMPYLLQYMT NA | NA |
| 43 | 48  | TMPYLLMSNS NA | NA |
| 47 | 60  | RRVLALMGIW NA | NA |
| 33 | 31  | YSALPMSLIG NA | NA |
| 32 | 43  | YSALPMINQV NA | NA |
| 80 | 90  | YSALPMYVGR NA | NA |
| 78 | 75  | YSALPMSGGL NA | NA |
| 53 | 53  | YSALPMYQRS NA | NA |
| 27 | 45  | YSALPMSGLT NA | NA |
| 63 | 63  | YSALPMMNRL NA | NA |

|     |                   |    |
|-----|-------------------|----|
| 42  | 47 SPALDMFNGL NA  | NA |
| 19  | 16 SPALDMIVII NA  | NA |
| 48  | 60 SPALDMMYVL NA  | NA |
| 33  | 38 SPALDMWNVS NA  | NA |
| 21  | 19 SPALDMIAGV NA  | NA |
| 26  | 31 SPALDMWDSS NA  | NA |
| 42  | 52 SPALDMFDVK NA  | NA |
| 50  | 70 YFPLDMIDNK NA  | NA |
| 46  | 58 YFPLDMSMNR NA  | NA |
| 112 | 106 YFPLDMKKMQ NA | NA |
| 45  | 68 YFPLDMSREF NA  | NA |
| 33  | 57 YFPLDMRATT NA  | NA |
| 27  | 42 YFPLDMSGKA NA  | NA |
| 67  | 74 YFPLDMQYAQ NA  | NA |
| 59  | 62 YFPLDMHGAF NA  | NA |
| 81  | 76 YFPLDMHGTG NA  | NA |
| 31  | 26 YFPLDMTSGF NA  | NA |
| 36  | 64 CVPFMILMIG NA  | NA |
| 35  | 44 MVPFMILRAA NA  | NA |
| 15  | 27 GVPFMILLTV NA  | NA |
| 55  | 66 IVPFMILSLI NA  | NA |
| 45  | 43 TVPFMILDWV NA  | NA |
| 32  | 42 PVPFMILGVG NA  | NA |
| 2   | 3 TVPFMILQLT NA   | NA |
| 33  | 41 SVPFMILNNV NA  | NA |
| 36  | 51 WVPFMILGNS NA  | NA |
| 40  | 42 MVPFMILKNQ NA  | NA |
| 7   | 12 HVPFMILQSF NA  | NA |
| 68  | 75 TRAWMMVLHS NA  | NA |
| 19  | 16 FRAWMMVRMH NA  | NA |
| 93  | 99 NRAWMMVSEL NA  | NA |
| 26  | 42 FRAWMMVAIK NA  | NA |
| 2   | 6 LRAWMMVSHF NA   | NA |
| 71  | 85 GRAWMMVAQY NA  | NA |
| 6   | 11 QRAWMMVYMF NA  | NA |
| 20  | 19 RRAWMMVART NA  | NA |
| 66  | 75 NRAWMMVQTG NA  | NA |
| 27  | 33 DRAWMMVMEV NA  | NA |
| 17  | 30 TRAWMMVKKT NA  | NA |
| 33  | 29 RRPLRIWNNV NA  | NA |
| 31  | 32 RRPLRIMKST NA  | NA |

|     |     |                |    |
|-----|-----|----------------|----|
| 28  | 30  | ASPFQLFNVG NA  | NA |
| 10  | 13  | KAPLKLMVMH NA  | NA |
| 11  | 14  | KAPLKLWNWI NA  | NA |
| 33  | 41  | KAPLKLLRKK NA  | NA |
| 13  | 8   | KAPLKLYKTQ NA  | NA |
| 37  | 38  | KAPLKLQGGG NA  | NA |
| 19  | 31  | KAPLKLGTG NA   | NA |
| 10  | 19  | NSPQLLMAVV NA  | NA |
| 41  | 59  | NSPQLLHGRR NA  | NA |
| 36  | 40  | NSPQLLYRLA NA  | NA |
| 29  | 36  | NSPQLLWQSL NA  | NA |
| 52  | 69  | NSPQLLYLRH NA  | NA |
| 35  | 58  | YKAFTMWGLG NA  | NA |
| 87  | 97  | YKAFTMIYAH NA  | NA |
| 53  | 48  | YKAFTMTSAL NA  | NA |
| 48  | 40  | YKAFTMSGKR NA  | NA |
| 50  | 60  | YKAFTMFQMS NA  | NA |
| 34  | 31  | YKAFTMVYMI NA  | NA |
| 56  | 69  | YKAFTMKLAF NA  | NA |
| 31  | 47  | YKAFTMYRPH NA  | NA |
| 28  | 57  | YKAFTMKVQV NA  | NA |
| 40  | 50  | YSPSLIHYTE NA  | NA |
| 38  | 63  | YSPSLIHRLR NA  | NA |
| 35  | 44  | YSPSLIYYGG NA  | NA |
| 36  | 44  | RAGFQLKNSQ NA  | NA |
| 51  | 51  | RAGFQLWGNF NA  | NA |
| 27  | 36  | RAGFQLFQIA NA  | NA |
| 58  | 80  | RAGFQLYMLW NA  | NA |
| 30  | 21  | RAGFQLFDII NA  | NA |
| 6   | 8   | RAGFQLFLKG NA  | NA |
| 43  | 51  | RAGFQLKSAY NA  | NA |
| 68  | 61  | RAGFQLKDEV NA  | NA |
| 95  | 100 | SYRVLRLHLAQ NA | NA |
| 80  | 103 | PPEKPKNLSC NA  | NA |
| 39  | 38  | PFSTVVPLKT NA  | NA |
| 70  | 85  | WFRHPASNRT NA  | NA |
| 58  | 104 | TQCMPREVAI NA  | NA |
| 62  | 58  | RQRIPYRLGR NA  | NA |
| 81  | 86  | AYLMIWDQKS NA  | NA |
| 10  | 8   | GPNKPGYLVG NA  | NA |
| 106 | 157 | FKSCRSALME NA  | NA |

|     |     |               |    |
|-----|-----|---------------|----|
| 41  | 34  | DGYFPSSVKP NA | NA |
| 32  | 45  | DFNSAVQLVE NA | NA |
| 101 | 148 | TKCNPMGYTK NA | NA |
| 56  | 62  | MLAKEASLAD NA | NA |
| 74  | 75  | THCHPMDILG NA | NA |
| 56  | 89  | IIPRVLAMRQ NA | NA |
| 41  | 36  | LVDRVAAARG NA | NA |
| 58  | 67  | PGEVVPILC NA  | NA |
| 10  | 14  | ELEDLEHLQL NA | NA |
| 56  | 58  | TFSCHWTIQL NA | NA |
| 54  | 54  | ARCEHADLLA NA | NA |
| 42  | 73  | LGYPYPSKS NA  | NA |
| 29  | 39  | IYTAPSSAVC NA | NA |
| 7   | 4   | PLGAPGEVVA NA | NA |
| 57  | 86  | AQMYPLQEIQ NA | NA |
| 42  | 46  | YRGEVQAMLG NA | NA |
| 80  | 106 | VETCPPPYH NA  | NA |
| 38  | 47  | EEGEELELVE NA | NA |
| 38  | 42  | DNMMAQNLVD NA | NA |
| 46  | 61  | SYRWPRYFEN NA | NA |
| 55  | 60  | IDPPVMNITQ NA | NA |
| 30  | 28  | PFDGPGGILA NA | NA |
| 93  | 99  | INAFGMQFYR NA | NA |
| 75  | 84  | PEIPHATFKA NA | NA |
| 21  | 13  | TVKELASLHG NA | NA |
| 68  | 76  | YKGIPYSQRP NA | NA |
| 24  | 24  | LPWQLLDMFN NA | NA |
| 41  | 47  | PLRHLGSYSF NA | NA |
| 57  | 104 | CKSLPWEMTK NA | NA |
| 30  | 38  | RNALPSDLLE NA | NA |
| 19  | 18  | GVLPALPQVV NA | NA |
| 30  | 50  | PGPTPLPLQI NA | NA |
| 30  | 40  | EAYIPKEQKY NA | NA |
| 45  | 40  | NCTTPEFLTR NA | NA |
| 67  | 57  | ELCQKLPLMK NA | NA |
| 88  | 93  | LWEKAQRLHL NA | NA |
| 48  | 70  | KVLEPMPSTA NA | NA |
| 42  | 37  | AILNESKYIC NA | NA |
| 25  | 21  | FYLSSEELNY NA | NA |
| 116 | 108 | DEKALQDQLV NA | NA |
| 93  | 117 | VCKELQYVKQ NA | NA |

|     |     |                |    |
|-----|-----|----------------|----|
| 17  | 27  | HAFGPGSGIG NA  | NA |
| 68  | 95  | NLAGAYNLKA NA  | NA |
| 37  | 49  | FSYPWRSWYS NA  | NA |
| 47  | 55  | SDDLPLNVSR NA  | NA |
| 25  | 25  | ISYTPRSIPC NA  | NA |
| 45  | 56  | PVKNALDLKF NA  | NA |
| 71  | 89  | CLIKYGHLRV NA  | NA |
| 41  | 30  | QLQEALLQQE NA  | NA |
| 83  | 120 | EEYIPFKQYA NA  | NA |
| 68  | 77  | VAIKTLKYTD NA  | NA |
| 35  | 29  | LLDRGYFLSG NA  | NA |
| 77  | 98  | QCRRTGTLQS NA  | NA |
| 38  | 26  | RVDSASGLGD NA  | NA |
| 26  | 38  | PGPRPLPLL NA   | NA |
| 25  | 38  | CPQYPGSEIL NA  | NA |
| 169 | 222 | CNEAALHVHT NA  | NA |
| 37  | 40  | TCRGSGNLQE NA  | NA |
| 83  | 110 | VAIKFHHLV NA   | NA |
| 38  | 58  | IQVDGEELVS NA  | NA |
| 101 | 161 | DERGPLEHLY NA  | NA |
| 21  | 25  | VWVVPWLQHF NA  | NA |
| 19  | 28  | HGECPFPLAD NA  | NA |
| 44  | 58  | ADASMARLYG NA  | NA |
| 24  | 16  | GYRLPAPMGC NA  | NA |
| 17  | 22  | AVDTAAQISE NA  | NA |
| 46  | 55  | KTSEVKQLIK NA  | NA |
| 71  | 75  | PKEGSLPLQF NA  | NA |
| 27  | 45  | KKETVWHLEE NA  | NA |
| 44  | 67  | YGKQPWYQLS NA  | NA |
| 84  | 73  | PSKGLEHLKE NA  | NA |
| 22  | 36  | SVSVAAGESA NA  | NA |
| 81  | 106 | GDVLP SHCWI NA | NA |
| 43  | 55  | VAGTPHSYID NA  | NA |
| 34  | 36  | VEGTVGTLLS NA  | NA |
| 30  | 33  | LKTVAQNYSS NA  | NA |
| 67  | 72  | PSFSAGGLVQ NA  | NA |
| 7   | 15  | TSKIPVALLI NA  | NA |
| 23  | 40  | DVADNGTLFL NA  | NA |
| 65  | 50  | VPTQAFEYLS NA  | NA |
| 46  | 51  | TRMEPFHFSV NA  | NA |
| 32  | 36  | PCSEVLTLTN NA  | NA |

|     |                   |    |
|-----|-------------------|----|
| 25  | 47 FEEVPYSELE NA  | NA |
| 44  | 53 SATRTIPLRR NA  | NA |
| 54  | 64 QVQNLLQLFD NA  | NA |
| 52  | 66 KSGSVANNWI NA  | NA |
| 22  | 31 TFHVPLGQSK NA  | NA |
| 58  | 65 GACEPIGLQV NA  | NA |
| 34  | 55 APLCNGSMVW NA  | NA |
| 50  | 63 TETLPRVNRT NA  | NA |
| 17  | 10 IKCQPWSSMI NA  | NA |
| 55  | 70 SRAYPTPLRS NA  | NA |
| 59  | 69 AKKAVGGLGK NA  | NA |
| 37  | 39 SQARLSSMVK NA  | NA |
| 26  | 30 KVSAPEEQFT NA  | NA |
| 149 | 179 CQYRIGHYRF NA | NA |
| 16  | 31 LTGTAGKISS NA  | NA |
| 60  | 93 TCWRPANVGE NA  | NA |
| 66  | 70 AIQEARRLLN NA  | NA |
| 54  | 55 ERIPLSQMTR NA  | NA |
| 41  | 57 FRGRLAPLAS NA  | NA |
| 31  | 61 FIHTLETQRT NA  | NA |
| 45  | 55 YEAGLAPYKL NA  | NA |
| 33  | 26 TLSQEVALLK NA  | NA |
| 38  | 40 NREAAEALGA NA  | NA |
| 50  | 67 EKLSPNQQRI NA  | NA |
| 45  | 71 DTQDAQRLVN NA  | NA |
| 5   | 9 LLYQLVFLLS NA   | NA |
| 46  | 40 KIRELSDYLL NA  | NA |
| 47  | 58 NFHEPWPQY NA   | NA |
| 44  | 47 KIQDPIQQAE NA  | NA |
| 8   | 12 DFCPPAPDQI NA  | NA |
| 23  | 27 RPKPPERINK NA  | NA |
| 33  | 42 VERVPFDAAT NA  | NA |
| 64  | 67 CILEMWNLHP NA  | NA |
| 77  | 82 RWELPRDRLV NA  | NA |
| 22  | 18 CNPGFSSFSE NA  | NA |
| 54  | 71 LKRPPNPLLD NA  | NA |
| 113 | 166 CQYGWQGLYC NA | NA |
| 63  | 73 FIAAVERLWD NA  | NA |
| 16  | 13 QGASLFSVTK NA  | NA |
| 9   | 16 GVKQVAELGS NA  | NA |
| 43  | 43 DYASAFQGHG NA  | NA |

|    |     |                |    |
|----|-----|----------------|----|
| 24 | 23  | TLSQLSQQEG NA  | NA |
| 57 | 73  | VFNMAAPMQL NA  | NA |
| 45 | 64  | GTDSPCKMKE NA  | NA |
| 55 | 67  | ALYTSGHLLC NA  | NA |
| 42 | 48  | DPKKAQIRS NA   | NA |
| 55 | 64  | SKAASLHWTG NA  | NA |
| 66 | 70  | EQKDF AHLGL NA | NA |
| 47 | 59  | QPDNIAHKAR NA  | NA |
| 58 | 66  | VLEDPVELIE NA  | NA |
| 69 | 105 | QARNVQHYHM NA  | NA |
| 39 | 44  | TFTDIASLNI NA  | NA |
| 28 | 47  | ATRTAQAIFD NA  | NA |
| 13 | 18  | CAFPLNSYMN NA  | NA |
| 41 | 45  | EFNGLKKNMP NA  | NA |
| 31 | 39  | LPLTHERINT NA  | NA |
| 21 | 39  | VWSSPSDLLE NA  | NA |
| 36 | 43  | SVTLPLEFPA NA  | NA |
| 86 | 112 | RLARPAKLSE NA  | NA |
| 15 | 17  | EFGQAFSFEA NA  | NA |
| 5  | 5   | CPDFFSHFSS NA  | NA |
| 35 | 38  | LRDIPQRLVN NA  | NA |
| 57 | 66  | LSEHG FGLIT NA | NA |
| 47 | 57  | QPERPRDVKL NA  | NA |
| 16 | 11  | MGVSVLAPYR NA  | NA |
| 51 | 44  | YERESQAYYQ NA  | NA |
| 23 | 29  | AAAPPAPFRL NA  | NA |
| 25 | 28  | GDKIYDNYYP NA  | NA |
| 29 | 31  | SLSLASNISG NA  | NA |
| 24 | 27  | VTCGPTGLLL NA  | NA |
| 50 | 48  | EGECAFP LNS NA | NA |
| 61 | 83  | LEKEVAGLWI NA  | NA |
| 15 | 34  | GARSPESDSI NA  | NA |
| 69 | 97  | CPQVPYWLWA NA  | NA |
| 28 | 64  | GDLFVHPLWN NA  | NA |
| 30 | 36  | SLTFVQALIQ NA  | NA |
| 82 | 110 | LQKAKNLDA NA   | NA |
| 21 | 23  | ALELPEALCR NA  | NA |
| 27 | 30  | ERRLPAGPKV NA  | NA |
| 63 | 81  | ILKRLAHTIG NA  | NA |
| 65 | 65  | LYRVVESLFY NA  | NA |
| 28 | 35  | YLCLPRSAAV NA  | NA |

|     |     |               |    |
|-----|-----|---------------|----|
| 184 | 256 | TCKKNQHLRL NA | NA |
| 37  | 43  | LQEELAPFGL NA | NA |
| 93  | 122 | LHCEVLHLPG NA | NA |
| 226 | 289 | HKNNQLALTL NA | NA |
| 68  | 88  | RIGGAHADTR NA | NA |
| 46  | 60  | QTLQGIHLKN NA | NA |
| 17  | 23  | YTITEGSLRA NA | NA |
| 52  | 52  | DFVPSASSR NA  | NA |
| 20  | 23  | LTQVKESLSS NA | NA |
| 56  | 84  | LFPGDLRTNL NA | NA |
| 9   | 13  | LCPDGFQLVA NA | NA |
| 75  | 97  | LEFVAARLGA NA | NA |
| 24  | 25  | VNGTVVPLGE NA | NA |
| 68  | 81  | ARKLPRNFVV NA | NA |
| 321 | 398 | PWGRLYHWQS NA | NA |
| 90  | 126 | SRCCRYPLTV NA | NA |
| 58  | 80  | FCIQPKAPRL NA | NA |
| 47  | 54  | SVMVARPLKF NA | NA |
| 34  | 38  | IGSTSPWLKK NA | NA |
| 26  | 19  | REVTPVELPN NA | NA |
| 37  | 34  | VNRTVWELSE NA | NA |
| 50  | 53  | TNCTLATLQP NA | NA |
| 50  | 53  | TNNPAWAVQE NA | NA |
| 39  | 49  | KIQLPRPKMA NA | NA |
| 32  | 34  | MKDNVRPLQQ NA | NA |
| 36  | 36  | LPCLAWASAQ NA | NA |
| 28  | 43  | EPFPPYPVAC NA | NA |
| 17  | 23  | SHSFPHPLYD NA | NA |
| 141 | 212 | LKRNPNGYKW NA | NA |
| 34  | 27  | VDSSIGFAV NA  | NA |
| 53  | 70  | EGQVSSPLQV NA | NA |
| 29  | 29  | LFKEARARAP NA | NA |
| 32  | 40  | PEETPLRFAS NA | NA |
| 51  | 37  | EVLFPQSDRF NA | NA |
| 45  | 47  | CSCRLYELLH NA | NA |
| 50  | 66  | QMIQPEKLLL NA | NA |
| 20  | 27  | TVTVISRYQS NA | NA |
| 12  | 28  | QRFTPFTLGK NA | NA |
| 39  | 46  | KHYFPINYKI NA | NA |
| 17  | 24  | SFVAPLEKSY NA | NA |
| 47  | 58  | AGVSLFGLSA NA | NA |



|     |     |               |    |
|-----|-----|---------------|----|
| 34  | 32  | GGDPPWPRVS NA | NA |
| 39  | 43  | AALSAGKVTI NA | NA |
| 50  | 45  | RQLAPRAKLD NA | NA |
| 19  | 24  | TAPEAIAFRT NA | NA |
| 79  | 117 | CIQAIAENRA NA | NA |
| 41  | 35  | LYQLVFLLE NA  | NA |
| 64  | 71  | KILFSEKLI NA  | NA |
| 64  | 64  | LEFVRASLIP NA | NA |
| 36  | 21  | NSLPSGHIQ NA  | NA |
| 88  | 96  | QELALLHVSP NA | NA |
| 41  | 42  | YNCTAWNSFG NA | NA |
| 93  | 126 | LLDRGHFLSG NA | NA |
| 51  | 58  | ANWTLTPLRV NA | NA |
| 31  | 45  | LPRCPGESSH NA | NA |
| 45  | 63  | NCEFVRGHKG NA | NA |
| 4   | 16  | SSSFQYMYL NA  | NA |
| 62  | 67  | QWSNPAQOTL NA | NA |
| 28  | 44  | HFTIPKEQYT NA | NA |
| 43  | 76  | EARRLLNLSR NA | NA |
| 36  | 37  | LLAVPAANTV NA | NA |
| 64  | 76  | LQVSKSPLWP NA | NA |
| 27  | 49  | VSGGIGALVR NA | NA |
| 45  | 75  | FLVHLSNVKV NA | NA |
| 21  | 20  | QCFYNSSYLN NA | NA |
| 32  | 43  | QQDFVNWLLA NA | NA |
| 51  | 69  | YNFTIIHLPR NA | NA |
| 76  | 92  | PYLDIHKLVQ NA | NA |
| 53  | 52  | ESTVPQSSRA NA | NA |
| 102 | 102 | EMKCINHYGG NA | NA |
| 38  | 39  | VVGAPQKITA NA | NA |
| 60  | 57  | IYPYSYAYKL NA | NA |
| 30  | 32  | PGPFPLPIIG NA | NA |
| 46  | 64  | RRKGSHGLEI NA | NA |
| 75  | 79  | CESDLRHYYD NA | NA |
| 39  | 60  | DVLIPFTLGR NA | NA |
| 69  | 86  | ASAQAKALSK NA | NA |
| 93  | 113 | AMRAINNYRW NA | NA |
| 91  | 116 | ASCRARPHSD NA | NA |
| 42  | 50  | LDQIFQNLKP NA | NA |
| 28  | 31  | EGSALGKQLN NA | NA |
| 81  | 95  | SKEQLTPLIK NA | NA |

|     |     |               |    |
|-----|-----|---------------|----|
| 49  | 55  | CTYDPLQGYT NA | NA |
| 50  | 54  | YKGVPLTQRP NA | NA |
| 51  | 57  | LDFAVGEYNK NA | NA |
| 50  | 63  | SWIHPRLTP NA  | NA |
| 14  | 13  | ENGTVSRYEG NA | NA |
| 56  | 53  | VLPRIGYLCP NA | NA |
| 19  | 24  | GPELVLVNVS NA | NA |
| 38  | 48  | ALDSFLRLND NA | NA |
| 57  | 83  | FQNNAIHYIS NA | NA |
| 47  | 46  | YFQSRFHLEI NA | NA |
| 90  | 103 | IIHLPRHGQQ NA | NA |
| 31  | 38  | FTLGILEALK NA | NA |
| 35  | 39  | VDTNQDRLVT NA | NA |
| 2   | 6   | YIFSPIPFLG NA | NA |
| 25  | 33  | GVNKKLGLLG NA | NA |
| 90  | 114 | HCCAFANWRR NA | NA |
| 19  | 41  | IPVIEYEQFI NA | NA |
| 12  | 12  | ATIVVGLED NA  | NA |
| 46  | 38  | LRFVPQSLFK NA | NA |
| 33  | 42  | CLITKAGLQV NA | NA |
| 130 | 155 | ALRSVEGLLP NA | NA |
| 19  | 19  | YYKDGEALKY NA | NA |
| 33  | 62  | LREHYAELRE NA | NA |
| 62  | 80  | KHLKPLAKFL NA | NA |
| 31  | 54  | PLEEVLNLAQ NA | NA |
| 83  | 99  | MDENPQQLKL NA | NA |
| 65  | 68  | LPGCPRHFNP NA | NA |
| 28  | 23  | IPEIWTWLRT NA | NA |
| 30  | 23  | VTAVSAGGRS NA | NA |
| 113 | 128 | DICRPHQICN NA | NA |
| 34  | 39  | TTCGIADFLS NA | NA |
| 35  | 46  | PLQGAFNYKY NA | NA |
| 18  | 31  | FGAQVAPATK NA | NA |
| 127 | 134 | TLAWSAHPLV NA | NA |
| 39  | 47  | SQSIPCSLMK NA | NA |
| 37  | 53  | TTGKEAALSY NA | NA |
| 63  | 86  | QLDQRLALIT NA | NA |
| 16  | 27  | PASDPKPNFT NA | NA |
| 36  | 27  | WAEDVLGNKT NA | NA |
| 35  | 46  | FGPAPGEQTQ NA | NA |
| 31  | 47  | RCRVPCNWKK NA | NA |

|     |                   |    |
|-----|-------------------|----|
| 52  | 66 MDISTGHMIL NA  | NA |
| 67  | 78 CIYRLLKLYC NA  | NA |
| 95  | 99 MNTILDNLAA NA  | NA |
| 24  | 40 VANLPKDYIT NA  | NA |
| 74  | 109 ATPPLGARRF NA | NA |
| 42  | 49 VRPQITALVR NA  | NA |
| 44  | 58 TYDFHGAWRG NA  | NA |
| 85  | 100 QYDSSGQWRH NA | NA |
| 25  | 36 TYYTPTRMKV NA  | NA |
| 75  | 68 LDQRLALITD NA  | NA |
| 75  | 68 KLQTAAKLNK NA  | NA |
| 43  | 53 GNEKLVKLES NA  | NA |
| 148 | 160 TLKCVTSLRK NA | NA |
| 37  | 53 QWFHNGNLIP NA  | NA |
| 65  | 64 GACEHRGYLY NA  | NA |
| 115 | 117 CDHRQRGFKR NA | NA |
| 39  | 43 AVKYLQSLER NA  | NA |
| 26  | 34 SVSPPGYTIL NA  | NA |
| 1   | 4 YPYASNFLQP NA   | NA |
| 63  | 55 QKTGMDNWIK NA  | NA |
| 25  | 28 SPACPGSNIT NA  | NA |
| 10  | 19 LIGDPSKQNS NA  | NA |
| 62  | 81 LSQEVALLE NA   | NA |
| 94  | 92 STKPIIDLYE NA  | NA |
| 27  | 31 VWLAVNDYYD NA  | NA |
| 52  | 56 DLEEPINFRL NA  | NA |
| 28  | 43 ANVSTSGLSG NA  | NA |
| 11  | 7 NGYDPVNLLN NA   | NA |
| 30  | 52 MTGTVLKMTD NA  | NA |
| 51  | 77 VQYKIYGQRQ NA  | NA |
| 39  | 61 VFQEPLFYEA NA  | NA |
| 192 | 251 PFGCHCHLRV NA | NA |
| 7   | 3 SLYDYLQLTT NA   | NA |
| 15  | 27 GFPGSFGYYD NA  | NA |
| 47  | 55 LYTWPANDRP NA  | NA |
| 42  | 59 TNPSTGHLFD NA  | NA |
| 26  | 22 GETDSSNLNV NA  | NA |
| 94  | 117 NLEHSMGMHS NA | NA |
| 44  | 50 KSIQLKDLTS NA  | NA |
| 22  | 26 ATDNKFAISE NA  | NA |
| 37  | 40 DLGFPNPLAE NA  | NA |

|     |                   |    |
|-----|-------------------|----|
| 37  | 53 LERAALPAQE NA  | NA |
| 41  | 53 LSALPSPLVT NA  | NA |
| 82  | 109 PNEKVGWLVE NA | NA |
| 84  | 113 EKYIPYTLYS NA | NA |
| 27  | 40 AGNHAAGILT NA  | NA |
| 29  | 27 YPPRVVSLEE NA  | NA |
| 23  | 36 IKIDPALKIK NA  | NA |
| 30  | 44 TLIDALNVTR NA  | NA |
| 18  | 25 WCKEASALVC NA  | NA |
| 36  | 58 SFANPLPSVK NA  | NA |
| 24  | 55 PTMSAETMEL NA  | NA |
| 199 | 242 LKWVSSSLRQ NA | NA |
| 13  | 19 PGPLPEAVLA NA  | NA |
| 15  | 24 IGKELEELRA NA  | NA |
| 65  | 80 ICSDPNNKRV NA  | NA |
| 38  | 55 LAIAVMNMWP NA  | NA |
| 25  | 58 PYCIVSHLQE NA  | NA |
| 137 | 178 LNSSALRQIA NA | NA |
| 21  | 34 GEATPVNLTE NA  | NA |
| 51  | 46 VDATVNQVLA NA  | NA |
| 31  | 53 LQLRAADLDV NA  | NA |
| 34  | 31 KIDPALKIKT NA  | NA |
| 54  | 64 GMRYLADMGY NA  | NA |
| 10  | 21 IEAAGEALQS NA  | NA |
| 54  | 93 IKQLFTNFIS NA  | NA |
| 210 | 254 VKWCALSHHE NA | NA |
| 95  | 133 IPAMKRSLAG NA | NA |
| 51  | 53 ALGSPQSHWL NA  | NA |
| 45  | 53 VCDSISEWVT NA  | NA |
| 32  | 44 IQKDPGESLG NA  | NA |
| 54  | 52 TVTVPKDLYV NA  | NA |
| 43  | 53 GTKNVTALLM NA  | NA |
| 72  | 61 PDVAPRWEQT NA  | NA |
| 34  | 49 AKKDPEGLFL NA  | NA |
| 22  | 16 TVDGPARLAE NA  | NA |
| 58  | 74 NSHMMASMLN NA  | NA |
| 54  | 49 GLFLSEGLKL NA  | NA |
| 23  | 26 FYDQAFAIYG NA  | NA |
| 77  | 84 LRQVSGPLHP NA  | NA |
| 37  | 41 VDMGPQQLOS NA  | NA |
| 24  | 19 QSFYIDRLKS NA  | NA |

|     |                   |    |
|-----|-------------------|----|
| 58  | 65 GFCCARHFWT NA  | NA |
| 56  | 43 LQTLPRSEHQ NA  | NA |
| 42  | 60 DQVSVEGLTV NA  | NA |
| 118 | 141 HGYWFRAWKA NA | NA |
| 25  | 43 RVSIPTDLIA NA  | NA |
| 15  | 24 PACPGSNITI NA  | NA |
| 18  | 25 PTSCPAPIGE NA  | NA |
| 37  | 47 DNLKLELIG NA   | NA |
| 40  | 47 HYAKGQPYID NA  | NA |
| 86  | 91 LTFHLFSLHG NA  | NA |
| 63  | 60 LLGALQSLLG NA  | NA |
| 23  | 32 LDYSLEHSLS NA  | NA |
| 143 | 169 DCLDAFHMDP NA | NA |
| 73  | 82 ENKSASWVRR NA  | NA |
| 157 | 179 QTAGELYQRW NA | NA |
| 17  | 23 ILSTLETLQI NA  | NA |
| 58  | 68 YLISSIPLOG NA  | NA |
| 44  | 52 GLDQLQAQTK NA  | NA |
| 25  | 31 AATRLKGIVP NA  | NA |
| 16  | 23 PRSIPCSLLE NA  | NA |
| 33  | 42 NMTCPSENKTR NA | NA |
| 26  | 34 PGPTPLPVIG NA  | NA |
| 52  | 54 DRVAPGPGLG NA  | NA |
| 63  | 70 MKANHAALAG NA  | NA |
| 37  | 64 DKRLMSSILT NA  | NA |
| 67  | 69 KTILPNPLSR NA  | NA |
| 113 | 124 CLEHFAELFD NA | NA |
| 10  | 7 PPAMSSALGT NA   | NA |
| 51  | 64 YQQGQNQLYN NA  | NA |
| 54  | 95 CDPGFSGCLK NA  | NA |
| 22  | 40 KKFIPFSRVT NA  | NA |
| 11  | 21 QWHMIGHLQP NA  | NA |
| 81  | 112 RRAKPOGQWA NA | NA |
| 24  | 36 TLNISESLPE NA  | NA |
| 54  | 57 LEIIPASQFC NA  | NA |
| 77  | 107 FLRDKLQYRS NA | NA |
| 86  | 97 KPVQLANLCP NA  | NA |
| 62  | 58 MKETAEAYLG NA  | NA |
| 41  | 60 LHWDPPELVP NA  | NA |
| 38  | 38 NPELSGSLMT NA  | NA |
| 72  | 80 LNWTLNLSL NA   | NA |

|     |     |                |    |
|-----|-----|----------------|----|
| 43  | 66  | LPGCPRGVNP NA  | NA |
| 13  | 15  | SSGILQSLSA NA  | NA |
| 63  | 76  | DVPAAMEFIA NA  | NA |
| 14  | 23  | PRWAYSPLLQ NA  | NA |
| 33  | 36  | MIGEVFYQRA NA  | NA |
| 48  | 55  | PYQCPKNGTA NA  | NA |
| 57  | 77  | EGRCAQPSRT NA  | NA |
| 36  | 52  | SIAILGHYST NA  | NA |
| 94  | 131 | LKSRLDTLSQ NA  | NA |
| 87  | 98  | KRMWHQALLR NA  | NA |
| 32  | 29  | NVASYGGLTG NA  | NA |
| 53  | 53  | DGECSEFPLNA NA | NA |
| 31  | 60  | FVNAAFVNTV NA  | NA |
| 43  | 62  | KILNPSALS NA   | NA |
| 28  | 38  | EKTLPFERSY NA  | NA |
| 24  | 43  | YTSOPHGLSS NA  | NA |
| 6   | 18  | QRKIPAKVVR NA  | NA |
| 222 | 305 | QYRALRKYYE NA  | NA |
| 51  | 61  | YKLVLGAFVG NA  | NA |
| 34  | 47  | KWFHNGSLSE NA  | NA |
| 142 | 168 | AILELLKYHQ NA  | NA |
| 53  | 52  | PWYLPWASSV NA  | NA |
| 46  | 48  | SLKEFSELEQ NA  | NA |
| 29  | 29  | QLFTPFSLGF NA  | NA |
| 73  | 87  | KMTGLKVLYI NA  | NA |
| 25  | 26  | KACNPLDAGP NA  | NA |
| 18  | 34  | DDCWMAPQRD NA  | NA |
| 44  | 75  | RYRMYASYKN NA  | NA |
| 31  | 65  | LEGRVGRASD NA  | NA |
| 28  | 45  | RGDFPSPIHV NA  | NA |
| 122 | 159 | HLCDAGQQHL NA  | NA |
| 40  | 62  | KFVSLEGFAQ NA  | NA |
| 57  | 71  | SKGTAEKLP NA   | NA |
| 150 | 168 | VYWNSANKRF NA  | NA |
| 33  | 24  | TSPEAIAYRK NA  | NA |
| 14  | 16  | DGKTPGAVNA NA  | NA |
| 76  | 73  | ASCYCRFFRS NA  | NA |
| 31  | 23  | LHISPSNMTN NA  | NA |
| 64  | 75  | AVGGLGKLGK NA  | NA |
| 84  | 91  | PLVGHMDLRP NA  | NA |
| 31  | 37  | HYQFLLDLGV NA  | NA |

|     |                   |    |
|-----|-------------------|----|
| 30  | 31 DPQPRYTQMN NA  | NA |
| 6   | 7 LSFHISNLQF NA   | NA |
| 54  | 58 RTLMLLAQMS NA  | NA |
| 45  | 40 DYLHTNPIET NA  | NA |
| 52  | 63 DFGLARPVKW NA  | NA |
| 55  | 67 EQEIPLRAIL NA  | NA |
| 55  | 57 FINYIEAYMT NA  | NA |
| 54  | 66 AKELYEPIWQ NA  | NA |
| 25  | 32 QLDREANLTS NA  | NA |
| 122 | 145 ECKYVKELRA NA | NA |
| 68  | 92 ELKNLQSLFQ NA  | NA |
| 57  | 65 IKWSPPTLID NA  | NA |
| 23  | 31 TAPEAIAYRK NA  | NA |
| 50  | 53 IRKVPGQFTF NA  | NA |
| 30  | 38 ALEESLKLKN NA  | NA |
| 24  | 19 GSNRPLSPHI NA  | NA |
| 84  | 106 ARCSRKALHV NA | NA |
| 72  | 62 SIEVPLNERI NA  | NA |
| 12  | 17 QLTWARHGES NA  | NA |
| 49  | 70 PGQEYNFLKM NA  | NA |
| 24  | 26 SMFVALNQKG NA  | NA |
| 76  | 85 QGKYIHPQNN NA  | NA |
| 58  | 74 FKLLASSSRF NA  | NA |
| 58  | 88 EVTRPMSVHM NA  | NA |
| 43  | 31 LVLVAAKLDT NA  | NA |
| 30  | 32 GWGIPDSLQH NA  | NA |
| 71  | 93 KVIRPVEHHT NA  | NA |
| 5   | 11 ELRRIASQVK NA  | NA |
| 19  | 13 NGKYISQMKA NA  | NA |
| 17  | 19 IQKGAFGSGFG NA | NA |
| 32  | 39 KPGFPKTIKT NA  | NA |
| 32  | 30 QPKRPMSIPI NA  | NA |
| 53  | 55 YQCQPLNQTS NA  | NA |
| 83  | 97 KSGSVLHHWN NA  | NA |
| 110 | 111 LRLCHAHMTC NA | NA |
| 51  | 58 EQSTLAQMYP NA  | NA |
| 70  | 76 LLSQGATLSG NA  | NA |
| 110 | 96 PFRCQCHLRV NA  | NA |
| 69  | 86 ERGPLEHLYS NA  | NA |
| 21  | 41 SCPHPSEILG NA  | NA |
| 64  | 72 NYKCPSGCRM NA  | NA |

|     |     |               |    |
|-----|-----|---------------|----|
| 20  | 45  | ACPVPLELLA NA | NA |
| 25  | 31  | SCKYSYNLFS NA | NA |
| 56  | 62  | GSGSGLPLLV NA | NA |
| 53  | 64  | VCTCHAGFFL NA | NA |
| 40  | 48  | GDSCCNPLSG NA | NA |
| 43  | 61  | AAEPPSGLAC NA | NA |
| 58  | 60  | LVFLPLQIVG NA | NA |
| 112 | 131 | YPMPIGQFWR NA | NA |
| 54  | 48  | VTTKAKQLKD NA | NA |
| 49  | 63  | LDLRPQGLEL NA | NA |
| 29  | 29  | VGAAPHPFLH NA | NA |
| 22  | 18  | MPALPFMLAE NA | NA |
| 20  | 26  | QVQNLLQLFN NA | NA |
| 9   | 17  | VKVSSEALAC NA | NA |
| 53  | 91  | LENLPQNGRQ NA | NA |
| 22  | 17  | PGTPLPIIG NA  | NA |
| 52  | 43  | MKDQLDNLLL NA | NA |
| 26  | 31  | LRAKPLMELI NA | NA |
| 106 | 102 | LHWTPIPQQS NA | NA |
| 88  | 100 | LTHKITHLST NA | NA |
| 84  | 90  | SHCCAFANWR NA | NA |
| 32  | 30  | PGTPLPFIG NA  | NA |
| 49  | 62  | DVVASSHLLQ NA | NA |
| 11  | 19  | PYFYLSPLQL NA | NA |
| 36  | 30  | ELSLPQHQSG NA | NA |
| 115 | 138 | WKAQLLNEYV NA | NA |
| 47  | 43  | FATFPTGNRE NA | NA |
| 29  | 35  | VYWGPGHPLN NA | NA |
| 51  | 77  | PHCSLATLIG NA | NA |
| 95  | 117 | VQKLAHQIYQ NA | NA |
| 33  | 64  | RAASAGSYSE NA | NA |
| 30  | 49  | LLFLPKSVSD NA | NA |
| 29  | 45  | SESEAHLLDS NA | NA |
| 24  | 27  | DSESEAHLLD NA | NA |
| 24  | 12  | LASNSSWLLS NA | NA |
| 77  | 78  | DVREPFHSIL NA | NA |
| 37  | 66  | THDDVGWLKT NA | NA |
| 60  | 83  | KQRRVIDLAF NA | NA |
| 19  | 25  | PAEDMARYYS NA | NA |
| 26  | 30  | DLDRIVALTS NA | NA |
| 47  | 59  | HLPEASGLET NA | NA |



|     |                   |    |
|-----|-------------------|----|
| 13  | 17 TGEKAMMLLG NA  | NA |
| 37  | 47 ELVDALQFVC NA  | NA |
| 43  | 59 VLERISTMRL NA  | NA |
| 24  | 24 LAAIPAPDFS NA  | NA |
| 44  | 52 ITVQPETQSA NA  | NA |
| 34  | 40 LQSIQRGIQV NA  | NA |
| 24  | 48 TCGIADFLST NA  | NA |
| 26  | 38 VNCSVMGPQE NA  | NA |
| 37  | 48 ITFIAAKFDG NA  | NA |
| 31  | 38 QTNAAAefdQ NA  | NA |
| 68  | 62 PVFCPRRYKQ NA  | NA |
| 55  | 61 PRDIPMNPNC NA  | NA |
| 46  | 80 RKPLSDKLLR NA  | NA |
| 38  | 52 YDCEAASRIG NA  | NA |
| 60  | 68 ALGKQLNLKL NA  | NA |
| 34  | 43 SETDFRNFQV NA  | NA |
| 48  | 50 LDQVLERIST NA  | NA |
| 30  | 42 AKTTPFNTRE NA  | NA |
| 57  | 88 GRLAPLASSR NA  | NA |
| 47  | 49 GSGLPLLVQR NA  | NA |
| 76  | 72 DLVEALYLVC NA  | NA |
| 71  | 82 CYCRVLSLNC NA  | NA |
| 56  | 73 KWSEQSDYLE NA  | NA |
| 50  | 54 IVQKLKkmVD NA  | NA |
| 52  | 70 NCRELLSQGA NA  | NA |
| 93  | 92 WKAMHNRLYG NA  | NA |
| 81  | 86 KHVKMLHIRS NA  | NA |
| 72  | 87 YATPPLGARR NA  | NA |
| 16  | 28 GTCTVMGINH NA  | NA |
| 175 | 196 YNKASNDMYH NA | NA |
| 16  | 14 TFSTPYNSIP NA  | NA |
| 51  | 79 SVGKSVELRE NA  | NA |
| 77  | 108 LRRLPAANFT NA | NA |
| 37  | 52 WVQKYISLLK NA  | NA |
| 106 | 122 GGPHTHYRG NA  | NA |
| 35  | 41 SYWKALGISP NA  | NA |
| 43  | 48 GLLDAGKMYV NA  | NA |
| 42  | 63 GHMDLRPHIQ NA  | NA |
| 0   | 1 SDVSAGNILQ NA   | NA |
| 27  | 44 VLHQPPAMSS NA  | NA |
| 21  | 30 GVGLALPQFF NA  | NA |

|       |       |            |    |    |
|-------|-------|------------|----|----|
| 36    | 26    | CPLNPNEHTI | NA | NA |
| 51    | 53    | EKPWAGTLQR | NA | NA |
| 28    | 38    | PGSCPIILIR | NA | NA |
| 47    | 27    | VVTAAGDMLK | NA | NA |
| 40    | 43    | LLSTHRTLLI | NA | NA |
| 81    | 75    | GDICPGTAKG | NA | NA |
| 46    | 60    | KVKELEDLEH | NA | NA |
| 63    | 66    | ELTCTASQKK | NA | NA |
| 24    | 18    | SRIHIEKIIG | NA | NA |
| 25    | 40    | GNCLIGGVSF | NA | NA |
| 22    | 47    | LITKAGLQVY | NA | NA |
| 67    | 75    | SASAPTSLRS | NA | NA |
| 48    | 61    | NLRGYYNQSE | NA | NA |
| 19    | 20    | IRNQINALTS | NA | NA |
| 33    | 32    | IAGSVEAVFC | NA | NA |
| 10490 | 11885 | NA         | NA | NA |
| 8686  | 10197 | NA         | NA | NA |
| 9759  | 10978 | NA         | NA | NA |
| 7881  | 9088  | NA         | NA | NA |
| 7739  | 9240  | NA         | NA | NA |
| 7499  | 8654  | NA         | NA | NA |









































































γ-aminobutyric acid (GABA) receptor ρ2 precursor [Homo sapiens]  
Kinininogenase 1 alpha subunit [Homo sapiens]  
Kinininogenase inhibitor Kazal type 5 isoform c precursor [Homo sapiens]  
Kinininogenase inhibitor Kazal type 5 isoform c precursor [Homo sapiens]  
Kinininogenase inhibitor Kazal type 5 isoform c precursor [Homo sapiens]  
Kinininogenase inhibitor Kazal type 5 isoform CD2-2 precursor [Homo sapiens]

netic protein 8B preproprotein [Homo sapiens]  
netic protein 8B preproprotein [Homo sapiens]  
nponent 8 alpha polypeptide precursor [Homo sapiens ]  
yd receptor family C group 5 member B precursor [Homo sapiens]  
4 receptor isoform b [Homo sapiens]  
containing 7A [Homo sapiens]  
containing 7A [Homo sapiens]  
ig atopy-related autoantigen 1 [Homo sapiens]  
ein 26 [Homo sapiens]  
rain 54 [Homo sapiens]  
450 family 4 subfamily F polypeptide 22 [Homo sa piens]  
orm 1 precursor [Homo sapiens]  
ptor P2X5 isoform A [Homo sapiens]  
ptor P2X5 isoform A [Homo sapiens]  
ase isoform a [Homo sapiens]  
type 2 member 19 [Homo sapiens]  
noglobulin-like receptor subfamily A member 5 isof orm 2 [Homo sapiens]  
foxide reductase B3 isoform 1 [Homo sapiens]  
rdothelial regulator precursor protein [Homo sapien s]  
coprotein precursor [Homo sapiens]  
coprotein precursor [Homo sapiens]  
v 1 isoform 2 precursor [Homo sapiens]  
d membrane protein 7 isoform 1 [Homo sapiens]  
d membrane protein 7 isoform 1 [Homo sapiens]  
C motif) ligand 13 (B-cell chemoattractant) [Homo sapien s]  
oform a precursor [Homo sapiens]  
2 precursor [Homo sapiens]  
2 precursor [Homo sapiens]  
2 precursor [Homo sapiens]  
2 precursor [Homo sapiens]  
sin 113 [Homo sapiens]  
lomo sapiens]  
3 precursor [Homo sapiens]  
3 precursor [Homo sapiens]  
11 X-linked isoform c [Homo sapiens]  
11 X-linked isoform c [Homo sapiens]

recognition protein 3 precursor [Homo sapiens]  
phosphatase receptor type D isoform 4 precursor [Homo sapiens]  
ated differentiation marker [Homo sapiens]  
hellucida-like domains 1 [Homo sapiens]  
hellucida-like domains 1 [Homo sapiens]  
eptidase with thrombospondin type 1 motif 13 isoform 2 p reprotopein [Homo sapiens]  
eptidase with thrombospondin type 1 motif 13 isoform 2 p reprotopein [Homo sapiens]  
eptidase with thrombospondin type 1 motif 13 isoform 2 p reprotopein [Homo sapiens]  
precursor [Homo sapiens]  
main receptor precursor [Homo sapiens]  
40) homolog subfamily C member 25 [Homo sapiens]  
lfate proteoglycan 3 [Homo sapiens]  
lfate proteoglycan 3 [Homo sapiens]  
lfate proteoglycan 3 [Homo sapiens]  
450 family 4 subfamily F polypeptide 12 [Homo sapiens]  
eptidase domain 19 preprotopein [Homo sapiens]  
eptidase domain 19 preprotopein [Homo sapiens]  
450 family 1 subfamily B polypeptide 1 [Homo sapiens]  
[Homo sapiens]  
n superfamily member 10 [Homo sapiens]  
n superfamily member 10 [Homo sapiens]  
nel subfamily K member 10 isoform 1 [Homo sapiens]  
Homo sapiens]  
oprotein receptor-related protein 4 [Homo sapiens]  
growth factor 1 isoform 1 preprotopein [Homo sapiens]  
member 4 [Homo sapiens]  
rsor [Homo sapiens]  
5 [Homo sapiens]  
icrotubule dynamics 1 [Homo sapiens]  
ndothelial aggregation receptor 1 [Homo sapiens]  
isoform Dsc3a preprotopein [Homo sapiens]  
1 [Homo sapiens]  
arcinoma-associated gene TD26 [Homo sapiens]  
ecursor [Homo sapiens]  
isoform 1 [Homo sapiens]  
2 receptor negative regulator [Homo sapiens]  
2 receptor negative regulator [Homo sapiens]  
cell preprotopein [Homo sapiens]  
orm B [Homo sapiens]  
ed receptor 21 [Homo sapiens]  
eta 4 precursor [Homo sapiens]

oid receptor 162 isoform 2 [Homo sapiens]  
oid receptor 162 isoform 2 [Homo sapiens]  
preproprotein [Homo sapiens]  
ide W preproprotein [Homo sapiens]  
ide W preproprotein [Homo sapiens]  
e protein 105 [Homo sapiens]  
: acid receptor 2 [Homo sapiens]  
V isoform 2 precursor [Homo sapiens]  
oid receptor 27 [Homo sapiens]  
XX alpha 1 [Homo sapiens]  
V collagen precursor [Homo sapiens]  
turation 1 [Homo sapiens]  
ucleotide exchange factor (GEF) 5 [Homo sapiens]  
gamma subfamily C 5 isoform 2 precursor [Homo sapiens]  
18 precursor [Homo sapiens]  
18 precursor [Homo sapiens]  
18 precursor [Homo sapiens]  
: type 2 member 50 [Homo sapiens]  
oe 2 preproprotein [Homo sapiens]  
oe 2 preproprotein [Homo sapiens]  
m 2 [Homo sapiens]  
amily 30 (zinc transporter) member 6 [Homo sapiens]  
in promoter (albumin D-box) binding protein [Homo sapiens]  
osine kinase 3 ligand [Homo sapiens]  
Homo sapiens]  
Homo sapiens]  
eat containing 8 family member E [Homo sapiens]  
6 open reading frame 10 [Homo sapiens]  
ine kinase 10 [Homo sapiens]  
MTV integration site family member 10B precursor [Homo sapiens]  
F [Homo sapiens]  
eptor beta [Homo sapiens]  
none preproprotein [Homo sapiens]  
2 preproprotein [Homo sapiens]  
2 preproprotein [Homo sapiens]  
: protease X homolog [Homo sapiens]  
: protease X homolog [Homo sapiens]  
netic protein 10 preproprotein [Homo sapiens]  
eleasing hormone receptor 1 isoform 2 [Homo sapiens]  
eptor alpha 4 isoform b precursor [Homo sapiens]  
eptor alpha 4 isoform b precursor [Homo sapiens]

in 5A [Homo sapiens]  
eat containing 25 [Homo sapiens]  
protein [Homo sapiens]  
in 17 precursor [Homo sapiens]  
in [Homo sapiens]  
ase II [Homo sapiens]  
no sapiens]  
actor I preproprotein [Homo sapiens]  
associated tyrosine kinase [Homo sapiens]  
[Homo sapiens]  
ing protein 2 preproprotein [Homo sapiens]  
rm alpha [Homo sapiens]  
rm 1 preproprotein [Homo sapiens]  
rm 1 preproprotein [Homo sapiens]  
oform 2 precursor [Homo sapiens] PART - 1  
oform 2 precursor [Homo sapiens] PART - 1  
ansmembrane protein 3 [Homo sapiens]  
/pe VI alpha 6 [Homo sapiens]  
/pe VI alpha 6 [Homo sapiens]  
/pe VI alpha 6 [Homo sapiens]  
pecific beta-1-glycoprotein 7 precursor [Homo sapiens]  
ch BMP regulator 2 isoform 1 [Homo sapiens]  
main containing 11 isoform 1 [Homo sapiens]  
protein [Homo sapiens]  
neurotrophic factor isoform 1 preproprotein [Homo sapiens]  
neurotrophic factor isoform 1 preproprotein [Homo sapiens]  
rdly-rectifying channel J11 [Homo sapiens]  
rdly-rectifying channel J11 [Homo sapiens]  
17-beta) dehydrogenase 7 [Homo sapiens]  
growth factor 2 isoform 1 precursor [Homo sapiens]  
growth factor 2 isoform 1 precursor [Homo sapiens]  
ly subfamily K member 15 [Homo sapiens]  
de reductase complex subunit 1 isoform 1 [Homo sapiens]  
[Homo sapiens]  
C1-like protein 1 isoform 1 [Homo sapiens]  
iated protein-like 5 [Homo sapiens]  
n a precursor [Homo sapiens]  
ylase alpha III subunit precursor [Homo sapiens]  
ated protein 1 precursor [Homo sapiens]  
orm 1 preproprotein [Homo sapiens]  
orm 1 preproprotein [Homo sapiens]

iform a precursor [Homo sapiens]  
ctif domain containing 4B [Homo sapiens]  
o sapiens]  
ryanodine receptor [Homo sapiens] - PART - 1  
ryanodine receptor [Homo sapiens] - PART - 1  
log [Homo sapiens]  
amily 13 (sodium/sulfate symporters) member 4 [Homo sapiens]  
ril interfacier 3 [Homo sapiens]  
oline receptor delta polypeptide precursor [Homo sapiens]  
elial growth factor D preproprotein [Homo sapiens]  
drocyte glycoprotein isoform alpha2 precursor [Homo sapiens]  
galactosyltransferase 2 [Homo sapiens]  
rotein PAL [Homo sapiens]  
ike 1 isoform 4 precursor [Homo sapiens]  
ike 1 isoform 4 precursor [Homo sapiens]  
ositol glycan anchor biosynthesis class N [Homo sapiens]  
eptor beta precursor [Homo sapiens]  
a 3 precursor [Homo sapiens]  
a 3 precursor [Homo sapiens]  
a type III domain containing 3A isoform 1 [Homo sapiens]  
sine amidohydrolase 2 isoform a [Homo sapiens]  
omolog subfamily C member 22 [Homo sapiens]  
inding protein isoform 2 [Homo sapiens]  
sor [Homo sapiens]  
nily 22 member 2 [Homo sapiens]  
em cell protein DSCD75 [Homo sapiens]  
polypeptide 17 isoform 3 [Homo sapiens]  
polypeptide 17 isoform 3 [Homo sapiens]  
rosis factor receptor precursor [Homo sapiens]  
; domain death agonist isoform 1 [Homo sapiens]  
orm b precursor [Homo sapiens]  
orm b precursor [Homo sapiens]  
domain containing 17 [Homo sapiens]  
gamma subfamily A 11 isoform 2 precursor [Homo sapiens]  
n superfamily DCC subclass member 4 [Homo sapiens]  
n superfamily DCC subclass member 4 [Homo sapiens]  
ynaptic) [Homo sapiens]  
y assurance homolog 3 [Homo sapiens]  
eat containing 3B [Homo sapiens]  
e-like [Homo sapiens]  
n J chain [Homo sapiens]



ed 1 [Homo sapiens]  
number C2 [Homo sapiens]  
hydroxylase domain containing 1 [Homo sapiens]  
eptidase domain 23 preproprotein [Homo sapiens]  
tidylinositol anchor attachment protein 1 [Homo sapiens]  
L preproprotein [Homo sapiens]  
aily member 2 [Homo sapiens]  
aily member 2 [Homo sapiens]  
ptor KA2 precursor [Homo sapiens]  
ptor KA2 precursor [Homo sapiens]  
ptor KA2 precursor [Homo sapiens]  
member 2 isoform 1 [Homo sapiens]  
otein alpha 9 59kDa [Homo sapiens]  
factor C domain containing 2 [Homo sapiens]  
lomo sapiens]  
lomo sapiens]  
ntegration site 2A isoform 2 [Homo sapiens]  
th factor 22 precursor [Homo sapiens]  
smutase 3 extracellular precursor [Homo sapiens]  
utyric acid (GABA) A receptor beta 2 isoform 1 [Homo sapiens]  
utyric acid (GABA) A receptor beta 2 isoform 1 [Homo sapiens]  
lin superfamily member 9B [Homo sapiens]  
lin superfamily member 9B [Homo sapiens]  
nthase 1 [Homo sapiens]  
sapiens]  
a 4 isoform 3 precursor [Homo sapiens]  
-hand containing transmembrane protein 1 [Homo sapiens]  
-hand containing transmembrane protein 1 [Homo sapiens]  
oprotein receptor-related protein 5 [Homo sapiens]  
acting protein [Homo sapiens]  
acting protein [Homo sapiens]  
sis regulator 1 isoform 2 [Homo sapiens]  
se isoform 1 [Homo sapiens]  
1 factor 17 precursor [Homo sapiens]  
glycoprotein precursor [Homo sapiens]  
ceptor family 52 subfamily K member 2 [Homo sapiens]  
pled receptor 37 like 1 [Homo sapiens]  
rase 11 (alpha 1.3) fucosyltransferase [Homo sapiens]  
[Homo sapiens]  
containing 2 precursor [Homo sapiens]  
[Homo sapiens]

[Homo sapiens]  
[Homo sapiens]  
inhibitor clade C member 1 [Homo sapiens]  
th factor binding protein 7 [Homo sapiens]  
sapiens]  
sapiens]  
ecursor [Homo sapiens]  
;or candidate 3 isoform a [Homo sapiens]  
;ulfotransferase 4 [Homo sapiens]  
en exchanger 8 [Homo sapiens]  
EGF-like growth factor [Homo sapiens]  
dase [Homo sapiens]  
l homeoboxes 1 [Homo sapiens]  
ne phosphatase receptor type F isoform 2 precursor [Homo sapiens]  
type 2 member 31 [Homo sapiens]  
or EphB6 precursor [Homo sapiens]  
or EphB6 precursor [Homo sapiens]  
rand factor A domain containing 5B1 [Homo sapiens]  
ntaining protein 1 isoform 2 [Homo sapiens]  
eproprotein [Homo sapiens]  
granule membrane glycoprotein 2 isoform 3 [Homo sapiens]  
associated 1 isoform 3 [Homo sapiens]  
e [Homo sapiens]  
e [Homo sapiens]  
nding protein 1 [Homo sapiens]  
[Homo sapiens]  
(XVII alpha 1 [Homo sapiens]  
n 1 [Homo sapiens]  
soform 2 preproprotein [Homo sapiens]  
rotein 3 precursor [Homo sapiens]  
rsor [Homo sapiens]  
enase (ubiquinone) Fe-S protein 6 13kDa (NADH-coenzyme Q reductase) [Homo sapiens]  
th factor 23 precursor [Homo sapiens]  
th factor 23 precursor [Homo sapiens]  
Homo sapiens]  
3 isoform 2 precursor [Homo sapiens]  
Homo sapiens]  
Homo sapiens]  
gamma isoform c [Homo sapiens]  
gamma isoform c [Homo sapiens]  
N-acetylgalactosamine 4-O) sulfotransferase 8 [Homo sapiens]

thase 3 isoform a [Homo sapiens]  
R-associating 1 [Homo sapiens]  
ptor ionotropic N-methyl-D-aspartate 3B [Homo sapiens]  
ptor ionotropic N-methyl-D-aspartate 3B [Homo sapiens]  
ptor ionotropic N-methyl-D-aspartate 3B [Homo sapiens]  
rg hormone [Homo sapiens]  
R member X2 [Homo sapiens]  
nily member 19 [Homo sapiens]  
r [Homo sapiens]  
no sapiens]  
no sapiens]  
ning growth factor beta binding protein 3 isoform 2 [Homo sapiens]  
7 isoform 2 precursor [Homo sapiens]  
tial nephritis antigen [Homo sapiens]  
tial nephritis antigen [Homo sapiens]  
:d protein 1 precursor [Homo sapiens]  
450 family 8 subfamily B polypeptide 1 [Homo sapiens]  
n syndrome chromosome region 19 protein [Homo sapiens]  
n syndrome chromosome region 19 protein [Homo sapiens]  
otein beta 6 [Homo sapiens]  
[Homo sapiens]  
eptidase domain 10 [Homo sapiens]  
eptidase domain 10 [Homo sapiens]  
eptidase domain 10 [Homo sapiens]  
5 isoform a [Homo sapiens]  
ctor D preproprotein [Homo sapiens]  
isoform a [Homo sapiens]  
ceptor alpha 2 preproprotein [Homo sapiens]  
nker binding protein 1 precursor [Homo sapiens]  
Homo sapiens]  
eptidase with thrombospondin type 1 motif 19 preproprotein [Homo sapiens]  
eptidase with thrombospondin type 1 motif 19 preproprotein [Homo sapiens]  
eptidase with thrombospondin type 1 motif 19 preproprotein [Homo sapiens]  
eptidase with thrombospondin type 1 motif 19 preproprotein [Homo sapiens]  
-sulfotransferase 2 [Homo sapiens]  
-sulfotransferase 2 [Homo sapiens]  
r [Homo sapiens]  
e protein 47 [Homo sapiens]  
eptidase with thrombospondin type 1 motif 4 preproprotein [Homo sapiens]  
age-gated channel Shal-related subfamily member 3 isoform 2 [Homo sapiens]  
substrate 4 [Homo sapiens]

substrate 4 [Homo sapiens]  
main containing 4 (endoplasmic reticulum) [Homo sapiens]  
main containing 4 (endoplasmic reticulum) [Homo sapiens]  
collagen isoform 1 precursor [Homo sapiens]  
in repeat containing 1 isoform 2 [Homo sapiens]  
in repeat containing 1 isoform 2 [Homo sapiens]  
in repeat containing 1 isoform 2 [Homo sapiens]  
sylation end product-specific receptor isoform 1 precursor [Homo sapiens]  
repeat transmembrane neuronal 3 [Homo sapiens]  
receptor precursor [Homo sapiens]  
ligand brain tumors 1 isoform a precursor [Homo sapiens]  
in precursor [Homo sapiens]  
asset sub-family A member 7 [Homo sapiens]  
sapiens]  
ette sub-family C (CFTR/MRP) member 2 [Homo sapiens]  
ette sub-family C (CFTR/MRP) member 2 [Homo sapiens]  
reproprotein [Homo sapiens]  
nplified 9 isoform 1 precursor [Homo sapiens]  
nplified 9 isoform 1 precursor [Homo sapiens]  
isoform A [Homo sapiens]  
isoform A [Homo sapiens]  
-Ala-His) box polypeptide 35 [Homo sapiens]  
-Ala-His) box polypeptide 35 [Homo sapiens]  
e 7A [Homo sapiens]  
e 7A [Homo sapiens]  
e 7A [Homo sapiens]  
roteinase 21 preproprotein [Homo sapiens]  
ciated plasma protein A preproprotein [Homo sapiens]  
ciated plasma protein A preproprotein [Homo sapiens]  
in 8 isoform 1 [Homo sapiens]  
none-like hormone isoform 2 preproprotein [Homo sapiens]  
ne protein 204 [Homo sapiens]  
meobox 4-like [Homo sapiens]  
meobox 4-like [Homo sapiens]  
meobox 4-like [Homo sapiens]  
ceptor family 8 subfamily K member 1 [Homo sapiens]  
orm 1 preproprotein [Homo sapiens]  
rm long [Homo sapiens]  
gamma subfamily B 4 isoform 2 precursor [Homo sapiens]  
ontaining 6B [Homo sapiens]  
hesion molecule 1 isoform b precursor [Homo sapiens]

B precursor [Homo sapiens]  
B precursor [Homo sapiens]  
ε protein 139 [Homo sapiens]  
nosis neuronal 8 [Homo sapiens]  
no sapiens]  
α 2 preproprotein [Homo sapiens]  
α 2 preproprotein [Homo sapiens]  
fide core domain 11 precursor [Homo sapiens]  
rotein beta 2 [Homo sapiens]  
ceptor family 4 subfamily S member 1 [Homo sapiens]  
enase (ubiquinone) 1 alpha subcomplex 9 39kDa [Homo sapiens]  
form 4 precursor [Homo sapiens]  
0 family 26 subfamily b polypeptide 1 [Homo sapiens]  
ain multiple 3 [Homo sapiens]  
led purinergic receptor P2Y8 [Homo sapiens]  
on p-53 related protein [Homo sapiens]  
:hyltransferase domain containing 1 [Homo sapiens]  
idase 1 precursor [Homo sapiens]  
γprotein receptor-related protein 10 precursor [Homo sapiens]  
ecursor [Homo sapiens]  
 precursor [Homo sapiens]  
th factor 1 receptor precursor [Homo sapiens]  
ie X open reading frame 61 [Homo sapiens]  
10 [Homo sapiens]  
fhydryl oxidase 1 isoform a [Homo sapiens]  
fhydryl oxidase 1 isoform a [Homo sapiens]  
fhydryl oxidase 1 isoform a [Homo sapiens]  
2 (prostacyclin) synthase [Homo sapiens]  
2 (prostacyclin) synthase [Homo sapiens]  
in containing ring finger 3 [Homo sapiens]  
thelial cell adhesion molecule 1 [Homo sapiens]  
n factor-like 8A [Homo sapiens]  
omolog subfamily C member 10 [Homo sapiens]  
:ptor-like 2 [Homo sapiens]  
:d receptor 137B [Homo sapiens]  
soform 1 precursor [Homo sapiens]  
soform 1 precursor [Homo sapiens]  
gy 2 domain containing E [Homo sapiens]  
no sapiens]  
omolog [Homo sapiens]  
omolog [Homo sapiens]



ce 2 preproprotein [Homo sapiens]  
e protein 25 isoform 1 [Homo sapiens]  
1 precursor [Homo sapiens]  
1 precursor [Homo sapiens]  
1 precursor [Homo sapiens]  
ette sub-family A member 8 [Homo sapiens]  
AG seven-pass G-type receptor 2 [Homo sapiens]  
AG seven-pass G-type receptor 2 [Homo sapiens]  
3 [Homo sapiens]  
yg preproprotein [Homo sapiens]  
e protein 132A isoform b [Homo sapiens]  
m 2 [Homo sapiens]  
tor D5 [Homo sapiens]  
tor D5 [Homo sapiens]  
id transcription factor site-1 protease preproprotein [Homo sapiens]  
and LCCL domain containing 2 [Homo sapiens]  
[Homo sapiens]  
in 13 [Homo sapiens]  
gene isoform a [Homo sapiens]  
osine synthase homolog [Homo sapiens]  
osine synthase homolog [Homo sapiens]  
cell signal transducer isoform 1 precursor [Homo sapiens]  
actor receptor superfamily member 7 precursor [Homo sapiens]  
IgG low affinity IIa receptor isoform 2 [Homo sapiens]  
isoform a precursor [Homo sapiens]  
ertase subtilisin/kexin type 1 inhibitor precursor [Homo sapiens]  
ertase subtilisin/kexin type 1 inhibitor precursor [Homo sapiens]  
or 15 preproprotein [Homo sapiens]  
chain alpha 6 isoform b precursor [Homo sapiens]  
tor family 12 subfamily D member 3 [Homo sapiens]  
e cytokine B10 precursor [Homo sapiens]  
inobutyric acid (GABA) receptor rho 3 [Homo sapiens]  
l polyphosphate histidine phosphatase 1 [Homo sapiens]  
cetolactate synthase)-like [Homo sapiens]  
lase X (M14 family) member 2 [Homo sapiens]  
l) precursor-like protein 2 isoform 1 [Homo sapiens]  
hesion molecule 4 isoform 2 precursor [Homo sapiens]  
sapiens]

riphosphate diphosphohydrolase 4 isoform a [Homo sapiens]  
nhibitory molecule 3 isoform a [Homo sapiens]  
eptidase domain 28 isoform 1 preproprotein [Homo sapiens]  
eta 1 precursor [Homo sapiens]  
al segment protein 1 [Homo sapiens]  
nt factor properdin precursor [Homo sapiens]  
eptidase domain 8 precursor [Homo sapiens]  
eptidase domain 8 precursor [Homo sapiens]  
d metalloprotease domain 17 preproprotein [Homo sapiens]  
d metalloprotease domain 17 preproprotein [Homo sapiens]  
d metalloprotease domain 17 preproprotein [Homo sapiens]  
hesion molecule isoform B precursor [Homo sapiens]  
led receptor 153 [Homo sapiens]  
nily gene 3-like 2 [Homo sapiens]  
r 1 isoform NR1-3 precursor [Homo sapiens]  
omain family 3 member A [Homo sapiens]  
osphate-5-phosphatase K isoform 1 [Homo sapiens]  
rase C-terminal domain containing 1 [Homo sapiens]  
osamide alpha-2 6-sialyltransferase 2 isoform a [Homo sapiens]  
osamide alpha-2 6-sialyltransferase 2 isoform a [Homo sapiens]  
[Homo sapiens]  
[Homo sapiens]  
6 [Homo sapiens]  
form a [Homo sapiens]  
form a [Homo sapiens]  
repeat containing 26 [Homo sapiens]  
eptidase domain 12 isoform 1 preproprotein [Homo sapiens]  
eptidase domain 12 isoform 1 preproprotein [Homo sapiens]  
eptidase domain 22 isoform 1 preproprotein [Homo sapiens]  
ity factor receptor [Homo sapiens]  
protein 275 [Homo sapiens]  
protein 275 [Homo sapiens]  
ulfotransferase 13 [Homo sapiens]  
e protease serine 12 [Homo sapiens]  
e protease serine 12 [Homo sapiens]  
tor D1 [Homo sapiens]  
2 precursor [Homo sapiens]  
rotein receptor-related protein associated protein 1 precursor [Homo sapiens]  
nthase reductase isoform 2 [Homo sapiens]  
[Homo sapiens]  
sion molecule isoform 1 precursor [Homo sapiens]



yltransferase 2 isoform C [Homo sapiens]  
subunit isoform 2 [Homo sapiens]  
ssette sub-family A member 2 isoform a [Homo sapiens]  
carcinoma transcript 1 [Homo sapiens]  
r 1 isoform a [Homo sapiens]  
r 1 isoform a [Homo sapiens]  
collagen preproprotein [Homo sapiens]  
collagen preproprotein [Homo sapiens]  
ile [Homo sapiens]  
ne deiminase type I [Homo sapiens]  
cretory protein LCCL domain containing 2 [Homo sapiens]  
in 2 isoform a precursor [Homo sapiens]  
in 2 isoform a precursor [Homo sapiens]  
brane protein with metallophosphoesterase domain isoform 1 [Homo sapiens]  
potassium channel subfamily H member 2 isoform c [Homo sapiens]  
ceptor-like 1 [Homo sapiens]  
ceptor-like 1 [Homo sapiens]  
ein [Homo sapiens]  
r superfamily domain containing 6-like [Homo sapiens]  
oxypeptidase B1 preproprotein [Homo sapiens]  
mponent 4A preproprotein [Homo sapiens]  
ll lymphoma-associated antigen 1 isoform 1 [Homo sapiens]  
or alpha 3 isoform a [Homo sapiens]  
ate mutase family member 5 [Homo sapiens]  
orm alpha-2 precursor [Homo sapiens]  
orm alpha-2 precursor [Homo sapiens]  
orm alpha-2 precursor [Homo sapiens]  
' domain containing 2 [Homo sapiens]  
0 family 1 subfamily A polypeptide 1 [Homo sapiens]  
alpha 2 isoform A [Homo sapiens]  
ia 7 isoform 1 [Homo sapiens]  
ia 7 isoform 1 [Homo sapiens]  
g 1 precursor [Homo sapiens]  
ific adhesion molecule [Homo sapiens]  
oproteinase 16 isoform 2 preproprotein [Homo sapiens]  
factor ligand superfamily member 13 isoform gamma protein [Homo sapiens]  
4 isoform 1 [Homo sapiens]  
fic beta-1-glycoprotein 6 isoform a [Homo sapiens]

fic beta-1-glycoprotein 6 isoform a [Homo sapiens]  
netic protein 2 preproprotein [Homo sapiens]  
netic protein 2 preproprotein [Homo sapiens]  
netic protein 2 preproprotein [Homo sapiens]  
a/beta receptor 2 isoform a precursor [Homo sapiens]  
ero-like 2 precursor [Homo sapiens]  
ceptor family 4 subfamily D member 11 [Homo sapiens]  
eceptor alpha 3 isoform b [Homo sapiens]  
ciated immunoglobulin-like receptor 1 isoform b precursor [Homo sapiens]  
1 isoform 1 [Homo sapiens]  
rand factor D and EGF domains [Homo sapiens]  
:igen 6 complex locus K [Homo sapiens]  
nsferase 1 family polypeptide A6 isoform 1 precursor [Homo sapiens]  
fate proteoglycan 4 [Homo sapiens]  
eceptor alpha 1 isoform a preproprotein [Homo sapiens]  
main containing 13 [Homo sapiens]  
mo sapiens]  
mo sapiens]  
open reading frame 187 [Homo sapiens]  
open reading frame 187 [Homo sapiens]  
oha class 1C member 1 [Homo sapiens]  
coupled receptor 89C [Homo sapiens]  
cell death 1 precursor [Homo sapiens]  
b-protein X 1 isoform b [Homo sapiens]  
isoform 2 precursor [Homo sapiens]  
ting hormone receptor isoform 1 precursor [Homo sapiens]  
n associated protein 1 [Homo sapiens]  
eceptor ionotropic AMPA 3 isoform 1 precursor [Homo sapiens]  
no sapiens]  
e dehydrogenase precursor [Homo sapiens]  
glycoprotein 1 [Homo sapiens]  
no sapiens]  
isforming growth factor beta binding protein 4 isoform a [Homo sapiens]  
isforming growth factor beta binding protein 4 isoform a [Homo sapiens]  
isforming growth factor beta binding protein 4 isoform a [Homo sapiens]  
brane 6 superfamily member 2 [Homo sapiens]  
ontaining 2 [Homo sapiens]  
ase A2 group IVB [Homo sapiens]  
orm 1 preproprotein [Homo sapiens]  
repeat containing 24 [Homo sapiens]  
repeat containing 24 [Homo sapiens]

log 2 [Homo sapiens]  
2 [Homo sapiens]  
2 [Homo sapiens]  
mate immuno-associated protein 5 isoform 1 [Homo sapiens]  
mate immuno-associated protein 5 isoform 1 [Homo sapiens]  
olog 1 [Homo sapiens]  
or IX preproprotein [Homo sapiens]  
-sulfotransferase (heparan glucosaminyl) 3 [Homo sapiens]  
eptidase with thrombospondin type 1 motif 12 preproprotein [Homo sapiens]  
eptidase with thrombospondin type 1 motif 12 preproprotein [Homo sapiens]  
genetic protein 3 preproprotein [Homo sapiens]  
eptidase with thrombospondin type 1 motif 3 preproprotein [Homo sapiens]  
eptidase with thrombospondin type 1 motif 3 preproprotein [Homo sapiens]  
eptidase with thrombospondin type 1 motif 3 preproprotein [Homo sapiens]  
recursor [Homo sapiens]  
-containing 42 [Homo sapiens]  
1 [Homo sapiens]  
1 [Homo sapiens]  
1 protein [Homo sapiens]  
eptidase domain 11 preproprotein [Homo sapiens]  
eptidase domain 11 preproprotein [Homo sapiens]  
eptidase domain 11 preproprotein [Homo sapiens]  
ypeptidase B2 isoform b [Homo sapiens]  
x 1 [Homo sapiens]  
x 1 [Homo sapiens]  
x 1 [Homo sapiens]  
omo sapiens]  
omo sapiens]  
VIII [Homo sapiens]  
orm a precursor [Homo sapiens]  
1 polypeptide isoform alpha-E preproprotein [Homo sapiens]  
2 [Homo sapiens]  
leasing hormone binding protein [Homo sapiens]  
tomerase isoform 1 [Homo sapiens]  
50 family 11 subfamily B polypeptide 1 isoform 1 precursor [Homo sapiens]  
lpha class 1A member 1 [Homo sapiens]  
0 [Homo sapiens]  
utyric acid (GABA) A receptor delta precursor [Homo sapiens]  
utyric acid (GABA) A receptor delta precursor [Homo sapiens]  
osyltransferase [Homo sapiens]  
osyltransferase [Homo sapiens]

nily 16 member 5 [Homo sapiens]  
gamma subfamily A 9 isoform 1 precursor [Homo sapiens]  
soform 1 [Homo sapiens]  
soform 1 [Homo sapiens]  
soform 1 [Homo sapiens]  
sapiens]  
sapiens]  
sapiens]  
allo-endopeptidase-like 1 [Homo sapiens]  
leotide dissociation stimulator-like 4 [Homo sapiens]  
mine (serotonin) receptor 2C [Homo sapiens]  
rotein 740 [Homo sapiens]  
rotein 740 [Homo sapiens]  
interacting molecule [Homo sapiens]  
sapiens]  
VI collagen precursor [Homo sapiens]  
ke 2 isoform a [Homo sapiens]  
AMTV integration site family member 6 precursor [Homo sapiens]  
gamma factor 10 precursor [Homo sapiens]  
led receptor 54 [Homo sapiens]  
cida glycoprotein 3 isoform 1 precursor [Homo sapiens]  
open reading frame 7 [Homo sapiens]  
ly 7 isoform 1 [Homo sapiens]  
gamma b [Homo sapiens]  
endo-alpha [Homo sapiens]  
isoform EDA-A1 [Homo sapiens]  
ecursor [Homo sapiens]  
[Homo sapiens]  
rosine kinase 4 isoform 1 precursor [Homo sapiens]  
rosine kinase 4 isoform 1 precursor [Homo sapiens]  
partate receptor subunit 2B precursor [Homo sapiens]  
or EphA1 [Homo sapiens]  
e protein 136 [Homo sapiens]  
omo sapiens]  
rotease 50 [Homo sapiens]  
eptidase with thrombospondin type 1 motif 16 prep roprot ein [Homo sapiens]  
eptidase with thrombospondin type 1 motif 16 prep roprot ein [Homo sapiens]  
sapiens]  
ecursor [Homo sapiens]  
ecursor [Homo sapiens]  
ecursor [Homo sapiens]

V alpha 3 preproprotein [Homo sapiens]  
or 8 [Homo sapiens]  
rotein [Homo sapiens]  
rsor [Homo sapiens]  
:omponent 3 precursor [Homo sapiens]  
:omponent 3 precursor [Homo sapiens]  
| hormone [Homo sapiens]  
isoform 1 [Homo sapiens]  
r sequence similarity 69 member A [Homo sapiens]  
:h factor vascular endothelial growth factor-related protein [Homo sapiens]  
e protease 5 [Homo sapiens]  
:xpressed [Homo sapiens]  
sapiens]  
sapiens]  
sapiens]  
eat LIG family member 2 [Homo sapiens]  
:omplement regulatory protein isoform 6 precursor [Homo sapiens]  
ecursor [Homo sapiens]  
derived protein 13 [Homo sapiens]  
alpha subfamily C 1 isoform 2 precursor [Homo sapiens]  
:osaminyltransferase 11 [Homo sapiens]  
)peptidase with thrombospondin type 1 motif 8 preproprotein [Homo sapiens]  
3 [Homo sapiens]  
3 [Homo sapiens]  
eceptor isoform a precursor [Homo sapiens]  
ted protein kinase kinase kinase 9 [Homo sapiens]  
ted protein kinase kinase kinase 9 [Homo sapiens]  
r polypeptide 7B cardiac muscle beta [Homo sapiens]  
rotein 3 [Homo sapiens]  
)0 [Homo sapiens]  
omolog subfamily C member 30 [Homo sapiens]  
sapiens]  
-like B [Homo sapiens]  
pha-linked acidic dipeptidase-like 1 [Homo sapiens]  
Homo sapiens]  
2 [Homo sapiens]  
2 [Homo sapiens]  
ia polypeptide isoform alpha preproprotein [Homo sapiens]  
ase 11 domain containing 1 isoform 2 [Homo sapiens]  
family 35 member D2 [Homo sapiens]  
ssette sub-family A member 6 [Homo sapiens]

family 20 (phosphate transporter) member 1 [Homo sapiens]  
family 20 (phosphate transporter) member 1 [Homo sapiens]  
retic protein 7 precursor [Homo sapiens]  
C motif) receptor 3 isoform A [Homo sapiens]  
ytokine A21 precursor [Homo sapiens]  
ecursor [Homo sapiens]  
e 1 isoform c precursor [Homo sapiens]  
ived factor 4 isoform 2 precursor [Homo sapiens]  
N-acetylglucosamine 6-O) sulfotransferase 5 [Homo sapiens]  
e) polymerase family member 15 isoform 2 [Homo sapiens]  
protein [Homo sapiens]  
protein [Homo sapiens]  
e protein 1 [Homo sapiens]  
rotein [Homo sapiens]  
Homo sapiens]  
lfotransferase 11 [Homo sapiens]  
ase 6 lysophosphatidic [Homo sapiens]  
form G6b-B precursor [Homo sapiens]  
in containing 3C isoform d [Homo sapiens]  
in containing 3C isoform d [Homo sapiens]  
led receptor 56 isoform b precursor [Homo sapiens]  
receptor 4 subtype EP4 [Homo sapiens]  
receptor 4 subtype EP4 [Homo sapiens]  
cell transforming sequence 2 oncogene-like [Homo sapiens]  
lfhydryl oxidase 2 [Homo sapiens]  
timulating 1 receptor precursor [Homo sapiens]  
b)butyric acid (GABA) B receptor 1 isoform d precursor [Homo sapiens]  
b)butyric acid (GABA) B receptor 1 isoform d precursor [Homo sapiens]  
no sapiens]  
family 39 (metal ion transporter) member 5 [Homo sapiens]  
ation differentiation and control 1 [Homo sapiens]  
ursor [Homo sapiens]  
coupled receptor 56 isoform a precursor [Homo sapiens]  
drogenase 4A1 isoform a precursor [Homo sapiens]  
eceptor containing LDLR class A repeats preproprotein [Homo sapiens]  
receptor 4 [Homo sapiens]  
receptor 4 [Homo sapiens]  
d (11-beta) dehydrogenase 2 [Homo sapiens]  
omolog-like [Homo sapiens]  
ssette sub-family A member 1 [Homo sapiens]  
lase A3 precursor [Homo sapiens]

orm 2 precursor [Homo sapiens]  
a isoform 1 precursor [Homo sapiens]  
ursor [Homo sapiens]  
yndrome 10 [Homo sapiens]  
nolog 3 [Homo sapiens]  
associated protein 1 [Homo sapiens]  
associated protein 1 [Homo sapiens]  
isoform a [Homo sapiens]  
angiogenesis inhibitor 2 [Homo sapiens]  
angiogenesis inhibitor 2 [Homo sapiens]  
F receptor 1 [Homo sapiens]  
recognition protein 2 precursor [Homo sapiens]  
ed glycosylation 14 homolog [Homo sapiens]  
ixation 1 [Homo sapiens]  
aminyltransferase VB isoform 1 [Homo sapiens]  
ecursor [Homo sapiens]  
side alpha-2 3-sialyltransferase 1 [Homo sapiens]  
idase precursor [Homo sapiens]  
rotein BstNI subfamily 2 [Homo sapiens]  
rotein BstNI subfamily 2 [Homo sapiens]  
rotein BstNI subfamily 2 [Homo sapiens]  
choline receptor beta 1 subunit precursor [Homo sapiens]  
ngene isoform b precursor [Homo sapiens]  
ociated protein 5 [Homo sapiens]  
e 2 preproprotein [Homo sapiens]  
recursor [Homo sapiens]  
[Homo sapiens]  
halogenase 1 [Homo sapiens]  
e A1 precursor [Homo sapiens]  
e 2 preproprotein [Homo sapiens]  
e 2 preproprotein [Homo sapiens]  
e 2 preproprotein [Homo sapiens]  
rm 1 [Homo sapiens]  
tidase Z isoform 1 [Homo sapiens]  
isoform 2 [Homo sapiens]  
eptidase with thrombospondin type 1 motif 2 isoform 2 [Homo sapiens]  
p53 inducible protein 13 [Homo sapiens]  
p53 inducible protein 13 [Homo sapiens]  
p53 inducible protein 13 [Homo sapiens]  
cer related gene 4 protein [Homo sapiens]  
lomo sapiens]

hic factor artemin isoform 3 precursor [Homo sapiens]  
e 4 protein isoform a precursor [Homo sapiens]  
 precursor [Homo sapiens]  
rowth plate and cartilage matrix associated [Homo sapiens]  
eptidase with thrombospondin type 1 motif 6 prepro protein [Homo sapiens]  
eptidase with thrombospondin type 1 motif 6 prepro protein [Homo sapiens]  
 isoform 1 precursor [Homo sapiens]  
togenic sperm protein isoform 1 [Homo sapiens]  
cule with Ig-like domain 2 [Homo sapiens]  
ein [Homo sapiens]  
ctor of activated T-cells cytoplasmic calcineurin-dependent 4 isoform 1 [Homo sapiens]  
ctor of activated T-cells cytoplasmic calcineurin-dependent 4 isoform 1 [Homo sapiens]  
 containing 1B [Homo sapiens]  
 23 precursor [Homo sapiens]  
 23 precursor [Homo sapiens]  
eptidase with thrombospondin type 1 motif 7 prepro protein [Homo sapiens]  
ge matrix protein [Homo sapiens]  
 a [Homo sapiens]  
nthesase [Homo sapiens]  
vertase subtilisin/kexin type 7 preproprotein [Homo sapiens]  
vertase subtilisin/kexin type 7 preproprotein [Homo sapiens]  
vertase subtilisin/kexin type 7 preproprotein [Homo sapiens]  
 e protein 151A [Homo sapiens]  
ctor-related 1 isoform 1 [Homo sapiens]  
ase A precursor [Homo sapiens]  
iation factor 9 precursor [Homo sapiens]  
ptor cysteine-rich type 1 precursor [Homo sapiens]  
lcNAc beta 1-4-galactosyltransferase 1 membrane-bound form [Homo sapiens]  
 ia preproprotein [Homo sapiens]  
/merase II complex component [Homo sapiens]  
/merase II complex component [Homo sapiens]  
/merase II complex component [Homo sapiens]  
ontaining 1 [Homo sapiens]  
olypeptide-related sequence B [Homo sapiens]  
age-gated channel Shal-related subfamily member 1 [Homo sapiens]  
age-gated channel Shal-related subfamily member 1 [Homo sapiens]  
 o sapiens]  
nain containing 98 [Homo sapiens]  
gamma subfamily B 6 isoform 1 precursor [Homo sapiens]  
 cursor [Homo sapiens]  
 oprotein [Homo sapiens]



oprotein [Homo sapiens]  
olog [Homo sapiens]  
EF-hand calcium binding domain [Homo sapiens]  
factor A domain containing 2 [Homo sapiens]  
[Homo sapiens]  
rowth factor beta 1 [Homo sapiens]  
n precursor [Homo sapiens]  
angiogenesis inhibitor 1 precursor [Homo sapiens ]  
expressed in FDCP 6 homolog [Homo sapiens]  
glyceride transfer protein large subunit precursor [Homo sapiens]  
terase 7 isoform 1 [Homo sapiens]  
amily 9 isoform A1 [Homo sapiens]  
e precursor [Homo sapiens]  
orm 1 precursor [Homo sapiens]  
orm 1 precursor [Homo sapiens]  
vertase subtilisin/kexin type 1 preproprotein [Homo sapiens]  
vertase subtilisin/kexin type 1 preproprotein [Homo sapiens]  
vertase subtilisin/kexin type 1 preproprotein [Homo sapiens]  
natrix protein 1 isoform 1 precursor [Homo sapiens]  
ing factor 1 isoform a precursor [Homo sapiens]  
ing factor 1 isoform a precursor [Homo sapiens]  
rmone 2 preproprotein [Homo sapiens]  
member 1 [Homo sapiens]  
protein 1 precursor [Homo sapiens]  
se I-like 2 [Homo sapiens]  
phin-dynorphin preproprotein [Homo sapiens]  
t glucokinase [Homo sapiens]  
isoform 2 [Homo sapiens]  
member 2 [Homo sapiens]  
erase 12 [Homo sapiens]  
nel subfamily K member 13 [Homo sapiens]  
9 open reading frame 61 [Homo sapiens]  
9 open reading frame 61 [Homo sapiens]  
ain containing 1 [Homo sapiens]  
eptidase with thrombospondin type 1 motif 18 preproprotein [Homo sapiens]  
eptidase with thrombospondin type 1 motif 18 preproprotein [Homo sapiens]  
ceptor 2 [Homo sapiens]  
g protein 1 [Homo sapiens]  
g protein 1 [Homo sapiens]  
or alpha 1 isoform 2 precursor [Homo sapiens]  
or alpha 1 isoform 2 precursor [Homo sapiens]

n 1 preproprotein [Homo sapiens]  
ceptor precursor [Homo sapiens]  
ceptor precursor [Homo sapiens]  
ide family 26 amino acid peptide [Homo sapiens]  
ninyltransferase V [Homo sapiens]  
eptidase with thrombospondin type 1 motif 14 isof orm 1 preproprotein [Homo sapiens]  
eptidase with thrombospondin type 1 motif 14 isof orm 1 preproprotein [Homo sapiens]  
ylase [Homo sapiens]  
E precursor [Homo sapiens]  
E precursor [Homo sapiens]  
E precursor [Homo sapiens]  
lase A6 isoform 1 precursor [Homo sapiens]  
lase A6 isoform 1 precursor [Homo sapiens]  
lase A6 isoform 1 precursor [Homo sapiens]  
odiester phosphodiesterase domain containing 5 [Homo sapiens]  
[Homo sapiens]  
mponent 7 precursor [Homo sapiens]  
ed receptor 4 [Homo sapiens]  
ller cell receptor 2B4 [Homo sapiens]  
otif protein 12B [Homo sapiens]  
otif protein 12B [Homo sapiens]  
rogenase 1 [Homo sapiens]  
Homo sapiens]  
ursor [Homo sapiens]  
ate synthase [Homo sapiens]  
iation factor 5 preproprotein [Homo sapiens]  
iation factor 5 preproprotein [Homo sapiens]  
iation factor 2 [Homo sapiens]  
ctor V precursor [Homo sapiens]  
xpressed in lymphoid tissues like 1 [Homo sapiens]  
xpressed in lymphoid tissues like 1 [Homo sapiens]  
xpressed in lymphoid tissues like 1 [Homo sapiens]  
th factor 6 precursor [Homo sapiens]  
orm a preproprotein [Homo sapiens]  
ar leucine-rich repeat and fibronectin type III domain containing 1 [Homo sapiens]  
amily 22 member 3 [Homo sapiens]  
receptor protein SORCS 3 [Homo sapiens]  
ate glucuronyltransferase [Homo sapiens]  
alternate reading frame protein isoform 1 [Homo sapiens]  
rotein-related protein 12 isoform a precursor [Homo sapiens]  
type 1 member 2 [Homo sapiens]

soform 1 [Homo sapiens]  
eceptor 1 isoform 1 precursor [Homo sapiens]  
subunit isoform a precursor [Homo sapiens]  
subunit isoform a precursor [Homo sapiens]  
subunit isoform a precursor [Homo sapiens]  
eta 5 precursor [Homo sapiens]  
brane protein 201 isoform 1 [Homo sapiens]  
ptor class F member 2 isoform 2 [Homo sapiens]  
rtate receptor subunit 2A isoform 1 precursor [Homo sapiens]  
rtate receptor subunit 2A isoform 1 precursor [Homo sapiens]  
riphosphate diphosphohydrolase 5 [Homo sapiens]  
e triphosphate diphosphohydrolase 3 [Homo sapiens]  
molog E5 [Homo sapiens]  
g lectin serine protease 2 isoform 2 precursor [Homo sapiens]  
led receptor family C group 5 member C isoform b [Homo sapiens]  
iation factor 10 precursor [Homo sapiens]  
iation factor 10 precursor [Homo sapiens]  
mo sapiens]  
mination factor B preproprotein [Homo sapiens]  
family 16 member 1 [Homo sapiens]  
;partate receptor subunit 2D precursor [Homo sapiens]  
containing 1 [Homo sapiens]  
ctif protein 12 [Homo sapiens]  
multiple domains 3 isoform 2 [Homo sapiens]  
multiple domains 3 isoform 2 [Homo sapiens]  
γ factor 7 precursor [Homo sapiens]  
γ factor 7 precursor [Homo sapiens]  
actor (ligand) superfamily member 12 precursor [Homo sapiens]  
actor (ligand) superfamily member 12 precursor [Homo sapiens]  
preproprotein [Homo sapiens]  
soform Dsc1a preproprotein [Homo sapiens]  
ma receptor 1 isoform 2 [Homo sapiens]  
ma receptor 1 isoform 2 [Homo sapiens]  
cursor [Homo sapiens]  
cursor [Homo sapiens]  
family 1 (glutamate transporter) member 7 [Homo sapiens]  
ing factor 3 receptor isoform b precursor [Homo sapiens]

ε protein 24 [Homo sapiens]  
growth factor beta 3 [Homo sapiens]  
I precursor [Homo sapiens]  
family 9 (sodium/hydrogen exchanger) member 2 [Homo sapiens]  
phosphatase receptor type C-associated protein [Homo sapiens]  
case 3A [Homo sapiens]  
case 3A [Homo sapiens]  
case 3A [Homo sapiens]  
multiple 7 [Homo sapiens]  
gamma-aminobutyric acid (GABA) receptor theta precursor [Homo sapiens]  
gamma-aminobutyric acid (GABA) receptor theta precursor [Homo sapiens]  
gamma-aminobutyric acid (GABA) receptor theta precursor [Homo sapiens]  
2 [Homo sapiens]  
hemoglobin receptor precursor [Homo sapiens]  
Homo sapiens]  
0 [Homo sapiens]  
associated antigen p97 isoform 1 precursor [Homo sapiens]  
repeat containing 5 isoform a [Homo sapiens]  
repeat containing 5 isoform a [Homo sapiens]  
or isoform c [Homo sapiens]  
cellular transmembrane adaptor 1 isoform b [Homo sapiens]  
dis-related 1 like 2 [Homo sapiens]  
e 7 [Homo sapiens]  
isoform b precursor [Homo sapiens]  
CUB domain EGF-like 1 [Homo sapiens]  
associated antigen p97 isoform 2 precursor [Homo sapiens]  
ε phosphatase receptor type K isoform b [Homo sapiens]  
containing 2 [Homo sapiens]  
N-acetylglucosaminyl transferase 1 [Homo sapiens]  
factor receptor superfamily member 8 isoform 1 precursor [Homo sapiens]  
ain containing 3 [Homo sapiens]  
proteinase 28 isoform 1 preproprotein [Homo sapiens]  
re protein [Homo sapiens]  
1 activating gene 1 activating protein 1 isoform a [Homo sapiens]  
peptidase with thrombospondin type 1 motif 5 preproprotein [Homo sapiens]  
propeller repeat containing 1 [Homo sapiens]  
propeller repeat containing 1 [Homo sapiens]  
ril interfacier 2 [Homo sapiens]  
rsor [Homo sapiens]  
4 isoform a [Homo sapiens]  
omain containing 2 isoform a [Homo sapiens]

isoform a [Homo sapiens]  
vertase subtilisin/kexin type 5 preproprotein [Homo sapiens]  
vertase subtilisin/kexin type 5 preproprotein [Homo sapiens]  
omolog subfamily C member 1 [Homo sapiens]  
omolog subfamily C member 1 [Homo sapiens]  
d syndrome protein [Homo sapiens]  
d syndrome protein [Homo sapiens]  
ivating protein 11A isoform 2 [Homo sapiens]  
ytokine B9 precursor [Homo sapiens]  
trix protein 2 precursor [Homo sapiens]  
eonine protein kinase MST4 isoform 2 [Homo sapiens]  
sapiens]  
nd TIR motif containing 1 [Homo sapiens]  
nd TIR motif containing 1 [Homo sapiens]  
lin superfamily member 9 isoform b [Homo sapiens]  
lin superfamily member 9 isoform b [Homo sapiens]  
lin superfamily member 9 isoform b [Homo sapiens]  
omain family 4 member D [Homo sapiens]  
eptidase domain 9 isoform 1 precursor [Homo sapiens]  
eptidase domain 9 isoform 1 precursor [Homo sapiens]  
factor preproprotein [Homo sapiens]  
etase 2 isoform b precursor [Homo sapiens]  
I collagen isoform 2C2 precursor [Homo sapiens]  
I collagen isoform 2C2 precursor [Homo sapiens]  
homa kinase [Homo sapiens]  
g 1 precursor [Homo sapiens]  
r factor 18 precursor [Homo sapiens]  
glycerol acyltransferase 1 [Homo sapiens]  
e phosphatase receptor type U isoform 3 precursor [Homo sapiens]  
le precursor [Homo sapiens]  
le precursor [Homo sapiens]  
homolog isoform 2 [Homo sapiens]  
bulin/bikunin preproprotein [Homo sapiens]  
tiation factor 3 precursor [Homo sapiens]  
no sapiens]  
no sapiens]  
peat and fibronectin type III domain containing 1 [Homo sapiens]  
eptidase domain 33 isoform beta preproprotein [Homo sapiens]  
n-like domain containing receptor 1 [Homo sapiens]  
n-like domain containing receptor 1 [Homo sapiens]  
actor beta polypeptide precursor [Homo sapiens]

actor beta polypeptide precursor [Homo sapiens]  
ala-Asp) box polypeptide 28 [Homo sapiens]  
ala-Asp) box polypeptide 28 [Homo sapiens]  
immunoglobulin-like receptor subfamily B member 2 isoform 2 [Homo sapiens]  
component 2 isoform 1 preproprotein [Homo sapiens]  
ATP-binding cassette sub-family B isoform 1 [Homo sapiens]  
type I domain-containing 1 isoform 1 [Homo sapiens]  
cassette sub-family A member 4 [Homo sapiens]  
phospholipase domain containing 6 [Homo sapiens]  
receptor ionotropic AMPA 1 isoform 1 [Homo sapiens]  
n factor-like 10 [Homo sapiens]  
rsor [Homo sapiens]  
rsor [Homo sapiens]  
amine-1-phosphodiester alpha-N-acetylglucosaminidase precursor [Homo sapiens]  
amine-1-phosphodiester alpha-N-acetylglucosaminidase precursor [Homo sapiens]  
e phosphatase receptor type J isoform 1 precursor [Homo sapiens]  
duced transcript 3 [Homo sapiens]  
duced transcript 3 [Homo sapiens]  
e 35 [Homo sapiens]  
e 35 [Homo sapiens]  
e 35 [Homo sapiens]  
ntaining 2 [Homo sapiens]  
wth factor binding protein 6 [Homo sapiens]  
2 precursor [Homo sapiens]  
rsor [Homo sapiens]  
rsor [Homo sapiens]  
wth factor isoform 1 preproprotein [Homo sapiens]  
vertase subtilisin/kexin type 4 [Homo sapiens]  
vertase subtilisin/kexin type 4 [Homo sapiens]  
id transcription factor peptidase site 2 [Homo sapiens]  
rotein delta 2 36kDa [Homo sapiens]  
1 [Homo sapiens]  
ell death 8 isoform 2 [Homo sapiens]  
omology domains 1 isoform 1 [Homo sapiens]  
led purinergic receptor P2Y5 [Homo sapiens]  
form a [Homo sapiens]  
r type IB isoform a precursor [Homo sapiens]  
enase (ubiquinone) Fe-S protein 2 [Homo sapiens]  
XI alpha 2 isoform 1 preproprotein [Homo sapiens]  
XI alpha 2 isoform 1 preproprotein [Homo sapiens]  
family 16 member 8 [Homo sapiens]

containing 1 [Homo sapiens]  
protein Ig superfamily member [Homo sapiens]  
precursor [Homo sapiens]  
factor receptor 1 precursor [Homo sapiens]  
1 preproprotein [Homo sapiens]  
1 preproprotein [Homo sapiens]  
peptidase with thrombospondin type 1 motif 1 preproprotein [Homo sapiens]  
peptide and tetratricopeptide repeat containing 1 [Homo sapiens]  
peptide containing 62 [Homo sapiens]  
peptide containing 62 [Homo sapiens]  
polyglutamine transferase 3 [Homo sapiens]  
erythrocyte associated isoform 1 [Homo sapiens]  
membrane domain containing 2 like [Homo sapiens]  
stimulating 1 (hepatocyte growth factor-like) [Homo sapiens]  
isoform 2 [Homo sapiens]  
isoform 2 [Homo sapiens]  
isoform b [Homo sapiens]  
polyglutamine transferase 1 [Homo sapiens]  
case XIV precursor [Homo sapiens]  
ligand receptor 146 [Homo sapiens]  
neurotrophic factor isoform b preproprotein [Homo sapiens]  
serine proteinase inhibitor clade H member 1 precursor [Homo sapiens]  
alpha II preproprotein [Homo sapiens]  
[Homo sapiens]  
[Homo sapiens]  
peptide repeat containing 66 [Homo sapiens]  
peptide repeat containing 66 [Homo sapiens]  
peptide repeat containing 66 [Homo sapiens]  
alpha-binding 1 like [Homo sapiens]  
precursor [Homo sapiens]  
[Homo sapiens]  
protein BstNI subfamily 4 precursor [Homo sapiens]  
protein 1 [Homo sapiens]  
protein 1 [Homo sapiens]  
precursor [Homo sapiens]  
[Homo sapiens]  
fibulin-like extracellular matrix protein 1 precursor [Homo sapiens]  
[Homo sapiens]  
mediate layer protein [Homo sapiens]  
mediate layer protein [Homo sapiens]  
sterol lipid transfer (START) domain containing 8 isoform a [Homo sapiens]

rase 25 domain containing 1 [Homo sapiens]  
γ-like isoform 2 [Homo sapiens]  
nergic receptor [Homo sapiens]  
nergic receptor [Homo sapiens]  
; protein precursor [Homo sapiens]  
D6 [Homo sapiens]  
D6 [Homo sapiens]  
pha class 1A member 2 [Homo sapiens]  
;e isoform a [Homo sapiens]  
r necrosis factor related protein 8 [Homo sapiens]  
family 9 (sodium/hydrogen exchanger) isoform 3 [Homo sapiens]  
factor 1 isoform 1 [Homo sapiens]  
factor 1 isoform 1 [Homo sapiens]  
ntaining kinase 2 [Homo sapiens]  
e 1 preproprotein [Homo sapiens]  
ce receptor alpha [Homo sapiens]  
main containing 15 [Homo sapiens]  
binding 2 precursor [Homo sapiens]  
ne rich transmembrane protein 2 [Homo sapiens]  
. [Homo sapiens]  
AMTV integration site family member 7A precursor [Homo sapiens]  
thyronine type I isoform a [Homo sapiens]  
oesterase 1 precursor [Homo sapiens]  
g Ig-like lectin 7 isoform 1 [Homo sapiens]  
3 domain containing 3 isoform 1 [Homo sapiens]  
ne phosphatase receptor type M isoform 2 precursor [Homo sapiens]  
ne phosphatase receptor type M isoform 2 precursor [Homo sapiens]  
ein 488 [Homo sapiens]  
ecific 6 isoform 1 precursor [Homo sapiens]  
eptidase with thrombospondin type 1 motif 10 preproprotein [Homo sapiens]  
eptidase with thrombospondin type 1 motif 10 preproprotein [Homo sapiens]  
eptidase with thrombospondin type 1 motif 10 preproprotein [Homo sapiens]  
nyelin phosphodiesterase 3 [Homo sapiens]  
r EphA2 [Homo sapiens]  
ne rich transmembrane protein 3 precursor [Homo sapiens]  
ne rich transmembrane protein 3 precursor [Homo sapiens]  
phate dehydrogenase 1-like [Homo sapiens]  
1 precursor [Homo sapiens]  
ptor ionotropic kainate 3 precursor [Homo sapiens]  
ntaining-like [Homo sapiens]  
main containing 10 [Homo sapiens]



lase alpha II subunit isoform 1 precursor [Homo sapiens]  
collagen isoform 1 precursor [Homo sapiens]  
like and metalloprotease with thrombospondin type 1 motifs 20 [Homo sapiens]  
like and metalloprotease with thrombospondin type 1 motifs 20 [Homo sapiens]  
like and metalloprotease with thrombospondin type 1 motifs 20 [Homo sapiens]  
orm L [Homo sapiens]  
omo sapiens]  
e precursor [Homo sapiens]  
ontaining 2 [Homo sapiens]  
phosphohistidine inorganic pyrophosphate phosphatase [Homo sapiens]  
led receptor 78 [Homo sapiens]  
led receptor 78 [Homo sapiens]  
ceptor 1 [Homo sapiens]  
ntaining 1 [Homo sapiens]  
ntaining 1 [Homo sapiens]  
ntaining 1 [Homo sapiens]  
(a) precursor [Homo sapiens]  
(a) precursor [Homo sapiens]  
ine kinase-like orphan receptor 1 isoform 1 [Homo sapiens]  
coiled coil protein 1 isoform 1 [Homo sapiens]  
nel subfamily K member 16 isoform 2 [Homo sapiens]  
-acetylgalactosaminyltransferase 7 [Homo sapiens]  
tor type IC isoform 1 [Homo sapiens]  
uence similarity 20 member A [Homo sapiens]  
EphA4 [Homo sapiens]  
ursor-like protein 1 isoform 1 precursor [Homo sapiens]  
e protein 109 [Homo sapiens]  
umor necrosis factor related protein 7 isoform a [Homo sapiens]  
sor [Homo sapiens]  
nd adenovirus receptor precursor [Homo sapiens]  
ceptor family 51 subfamily I member 1 [Homo sapiens]  
d receptor 132 [Homo sapiens]  
d receptor 132 [Homo sapiens]  
d receptor 132 [Homo sapiens]  
apparatus protein 1 [Homo sapiens]  
syltransferase [Homo sapiens]  
precursor [Homo sapiens]  
precursor [Homo sapiens]  
motif) receptor 9 isoform A [Homo sapiens]  
motif) receptor 9 isoform A [Homo sapiens]  
nce calcium-activated potassium channel protein 2 isoform b [Homo sapiens]

se activating polypeptide 1 (pituitary) receptor type I precursor [Homo sapiens]  
alian grainyhead protein isoform 1 [Homo sapiens]  
mo sapiens]  
mo sapiens]  
b-phosphate O-acyltransferase 5 [Homo sapiens]  
io sapiens]  
io sapiens]  
mo sapiens]  
brane protein 170B [Homo sapiens]  
rdly-rectifying channel subfamily J member 10 [Homo sapiens]  
nily 10 member 1 [Homo sapiens]  
ogenase E1 alpha 2 [Homo sapiens]  
ceptor family 4 subfamily D member 5 [Homo sapiens]  
i precursor [Homo sapiens]  
i precursor [Homo sapiens]  
rectal carcinoma [Homo sapiens]  
wth factor (beta-urogastrone) [Homo sapiens]  
o sapiens]  
sin 114 [Homo sapiens]  
lomo sapiens]  
! [Homo sapiens]  
) sapiens]  
) sapiens]  
-hand calcium binding protein 3 isoform 2 [Homo sapiens]  
XXIX alpha 1 [Homo sapiens]  
XXIX alpha 1 [Homo sapiens]  
eta 3 precursor [Homo sapiens]  
assette sub-family C member 6 isoform 1 [Homo sapiens]  
sted precursor [Homo sapiens]  
tor muscarinic 3 [Homo sapiens]  
: 1 precursor [Homo sapiens]  
tor matrix proteoglycan 1 [Homo sapiens]  
tide cyclotransferase-like [Homo sapiens]  
nnosyltransferase 1 isoform a [Homo sapiens]  
wth factor 2 receptor precursor [Homo sapiens]  
oprotein receptor-related protein 6 [Homo sapiens]  
ha-1 3-)-glycoprotein beta-1 2-N-acetylglucosaminyltransferase [Homo sapiens]  
se 1 precursor [Homo sapiens]  
eptor alpha chain isoform a precursor [Homo sapiens]  
hate dehydrogenase precursor [Homo sapiens]  
roteinase 24 preproprotein [Homo sapiens]

roteinase 24 preproprotein [Homo sapiens]  
mo sapiens]  
ylcholine transporter [Homo sapiens]  
ylcholine transporter [Homo sapiens]  
cretory protein LCCL domain containing 1 [Homo sapiens ]  
r-like protein 1 [Homo sapiens]  
[Homo sapiens]  
: 3 precursor [Homo sapiens]  
: 3 precursor [Homo sapiens]  
ein 337 [Homo sapiens]  
somerase G [Homo sapiens]  
e 2 lysosomal isoform 1 precursor [Homo sapiens]  
d metalloproteinase domain 15 isoform 2 prepropr otein [Homo sapiens]  
otif domain containing 4 [Homo sapiens]  
ATP-dependent isoform alpha precursor [Homo sapiens]  
protein [Homo sapiens]  
like testicular protein [Homo sapiens]  
otide receptor 1 [Homo sapiens]  
side alpha-2 3-sialyltransferase 4 [Homo sapiens]  
isoform 1 precursor [Homo sapiens]  
rier family 9 (sodium/hydrogen exchanger) member 6 isoform a [Homo sapiens]  
e A binding domain containing 5 isoform 1 [Homo sapiens]  
adhesion molecule precursor [Homo sapiens]  
ylgalactosaminyltransferase 2 [Homo sapiens]  
9 isoform 1 precursor [Homo sapiens]  
in type I domain containing 4 [Homo sapiens]  
in type I domain containing 4 [Homo sapiens]  
in type I domain containing 4 [Homo sapiens]  
icrobial peptide preproprotein [Homo sapiens]  
: D1 [Homo sapiens]  
ntaining 8 [Homo sapiens]  
eptidase with thrombospondin type 1 motif 9 prepro protei n [Homo sapiens]  
eptidase with thrombospondin type 1 motif 9 prepro protei n [Homo sapiens]  
led receptor 125 [Homo sapiens]  
atase 1 (formerly 2C)-like [Homo sapiens]

ily 2 member A isoform a [Homo sapiens]  
pled receptor 116 [Homo sapiens]  
soform HKI [Homo sapiens]  
ceptor type 1 [Homo sapiens]  
r polypeptide receptor [Homo sapiens]  
protein 5 [Homo sapiens]  
onyltransferase 2 [Homo sapiens]  
γbutyric acid (GABA) A receptor beta 1 precursor [Homo sapiens]  
γbutyric acid (GABA) A receptor beta 1 precursor [Homo sapiens]  
se 4 [Homo sapiens]  
nily 27 (fatty acid transporter) member 2 [Homo sapiens]  
ε 6-O-sulfotransferase 3 [Homo sapiens]  
δant calcium channel gamma-2 subunit [Homo sapiens]  
δcursor [Homo sapiens]  
δ/1 (platelet) isoform 2 [Homo sapiens]  
δVA synthetase 2 precursor [Homo sapiens]  
δproprotein [Homo sapiens]  
δain containing 1 isoform a [Homo sapiens]  
δδ peptidase 10 preproprotein [Homo sapiens]  
δXIII [Homo sapiens]  
δδ X preproprotein [Homo sapiens]  
δno sapiens]  
δosphate synthase [Homo sapiens]  
δjelly-like protein precursor [Homo sapiens]  
δjelly-like protein precursor [Homo sapiens]  
δrane protein 201 isoform 2 [Homo sapiens]  
δeta 3 precursor [Homo sapiens]  
δε A2 group III precursor [Homo sapiens]  
δε A2 group III precursor [Homo sapiens]  
δe non-receptor 1 [Homo sapiens]  
δno sapiens]  
δidase [Homo sapiens]  
δ molecule CASPR3 [Homo sapiens]  
δifferentiation factor 6 precursor [Homo sapiens]  
δifferentiation factor 6 precursor [Homo sapiens]  
δI5 beta polypeptide [Homo sapiens]  
δate beta-glucosyltransferase isoform 1 [Homo sapiens]  
δa [Homo sapiens]  
δlcNAc beta 1-3-galactosyltransferase 1 [Homo sapiens]  
δycoprotein 2 preproprotein [Homo sapiens]  
δroteinase 14 preproprotein [Homo sapiens]

nily 20 member 2 [Homo sapiens]  
genase like [Homo sapiens]  
9 open reading frame 79 [Homo sapiens]  
9 open reading frame 79 [Homo sapiens]  
; [Homo sapiens]  
Homo sapiens]  
A dehydrogenase family member 9 [Homo sapiens]  
ssette sub-family A member 12 isoform a [Homo sapiens]  
ssette sub-family A member 12 isoform a [Homo sapiens]  
with factor beta 2 isoform 2 [Homo sapiens]  
orm 2 [Homo sapiens]  
rone HSC20 [Homo sapiens]  
rain 25 [Homo sapiens]  
ein pentraxin-related [Homo sapiens]  
: 2 precursor [Homo sapiens]  
amily member 4 isoform 2 precursor [Homo sapiens]  
amide glucosyltransferase-like 1 [Homo sapiens]  
ormone receptor type II [Homo sapiens]  
roteinase 15 preproprotein [Homo sapiens]  
roprotein [Homo sapiens]  
lpha class 2A member 2 [Homo sapiens]  
(flavin containing) domain 2 isoform b [Homo sapiens]  
g 4 precursor [Homo sapiens]  
genase 14 (all-trans and 9-cis) [Homo sapiens]  
eceptor family 8 subfamily S member 1 [Homo sapiens]  
e 2 preproprotein [Homo sapiens]  
e 2 preproprotein [Homo sapiens]  
ne protease serine 11F [Homo sapiens]  
de repeat domain 17 [Homo sapiens]  
3 protein [Homo sapiens]  
g Ig-like lectin 5 [Homo sapiens]  
rotein [Homo sapiens]  
d growth factor alpha isoform 1 preproprotein [Homo sapiens]  
:ticator tissue isoform 3 preproprotein [Homo sapiens]  
260-1 isoform [Homo sapiens]  
260-1 isoform [Homo sapiens]  
260-1 isoform [Homo sapiens]  
260-1 isoform [Homo sapiens]  
-Glu-Leu) containing 2 [Homo sapiens]  
: 1 isoform 1 precursor [Homo sapiens]  
1 isoform 1 precursor [Homo sapiens]

ptor matrix proteoglycan 2 [Homo sapiens]  
(II alpha 1 long isoform precursor [Homo sapiens ]  
(II alpha 1 long isoform precursor [Homo sapiens ]  
e 1 preproprotein [Homo sapiens]  
ain containing 1 isoform 1 [Homo sapiens]  
ha polypeptide isoform 1 precursor [Homo sapiens]  
linked glycosylation 11 [Homo sapiens]  
e 1 [Homo sapiens]  
[Homo sapiens]  
[Homo sapiens]  
[Homo sapiens]  
1 [Homo sapiens]  
se O [Homo sapiens]  
g [Homo sapiens]  
o sapiens]  
8 [Homo sapiens]  
ceptor family 1 subfamily L member 6 [Homo sapiens]  
accessory 2 precursor [Homo sapiens]  
[Homo sapiens]  
orm 6 [Homo sapiens]  
o sapiens]  
o sapiens]  
o sapiens]  
retic protein 1 isoform 3 precursor [Homo sapiens]  
ent calcium channel gamma-4 subunit [Homo sapiens]  
ent calcium channel gamma-4 subunit [Homo sapiens]  
e alpha-2-macroglobulin domain containing 8 [Homo sapiens]  
e alpha-2-macroglobulin domain containing 8 [Homo sapiens]  
e 8 isoform 1 precursor [Homo sapiens]  
gamma subfamily A 4 isoform 2 precursor [Homo sapiens]  
antimicrobial peptide 2 precursor [Homo sapiens]  
antimicrobial peptide 2 precursor [Homo sapiens]  
l nonvoltage-gated 1 gamma [Homo sapiens]  
l nonvoltage-gated 1 gamma [Homo sapiens]  
ursor [Homo sapiens]  
K collagen precursor [Homo sapiens]  
R domain containing 5 isoform A [Homo sapiens]  
in containing 2 isoform 2 [Homo sapiens]  
proprotein [Homo sapiens]  
ette sub-family D member 3 isoform a [Homo sapiens]  
receptor muscarinic 2 [Homo sapiens]

receptor muscarinic 2 [Homo sapiens]  
acetylcholinesterase homolog [Homo sapiens]  
epsilon 4 superfamily member 5 [Homo sapiens]  
[Homo sapiens]  
[Homo sapiens]  
[Homo sapiens]  
growth factor beta isoform 1 preproprotein [Homo sapiens]  
incompatibility complex class I E precursor [Homo sapiens]  
inhibitor containing histone demethylase 1 homolog D [Homo sapiens]  
isoform 9 [Homo sapiens]  
translation initiation factor 2-alpha kinase 3 [Homo sapiens]  
translation initiation factor 2-alpha kinase 3 [Homo sapiens]  
containing 5 [Homo sapiens]  
[Homo sapiens]  
molecule with homology to L1CAM precursor [Homo sapiens]  
epsilon protein 217 [Homo sapiens]  
family 25 member 35 [Homo sapiens]  
in [Homo sapiens]  
in [Homo sapiens]  
Kerman 4 feline sarcoma viral oncogene homolog isoform 1 precursor [Homo sapiens]  
[Homo sapiens]  
[Homo sapiens]  
mette sub-family D (ALD) member 1 [Homo sapiens]  
protein 111 [Homo sapiens]  
preproprotein [Homo sapiens]  
protease STE24 [Homo sapiens]  
epsilon protein with EGF-like and two follistatin-like domains 1 [Homo sapiens]  
inhibitor subfamily K member 3 [Homo sapiens]  
peptidase with thrombospondin type 1 motif 17 preproprotein [Homo sapiens]  
differentially expressed 2-like [Homo sapiens]  
renal nephritis antigen-like 1 [Homo sapiens]  
renal nephritis antigen-like 1 [Homo sapiens]  
protein [Homo sapiens]  
protein [Homo sapiens]  
protein [Homo sapiens]  
protein [Homo sapiens]  
alpha 2 preproprotein [Homo sapiens]  
[Homo sapiens]  
esterase 3 [Homo sapiens]  
epsilon N polypeptide 1 precursor [Homo sapiens]  
isoform CGRP preproprotein [Homo sapiens]

mo sapiens]  
ze-gated channel Shal-related subfamily member 2 [Homo sapiens]  
:tosyltransferase 6 [Homo sapiens]  
:tosyltransferase 6 [Homo sapiens]  
protein [Homo sapiens]  
proteoglycan link protein 1 [Homo sapiens]  
or VIII isoform a precursor [Homo sapiens]  
iel subfamily K member 7 isoform C [Homo sapiens]  
roteinase 11 preproprotein [Homo sapiens]  
eta 6 precursor [Homo sapiens]  
sapiens]  
essin-neurophysin II preproprotein [Homo sapiens]  
or of lin-12-like 2 [Homo sapiens]  
e 2 preproprotein [Homo sapiens]  
eproprotein [Homo sapiens]  
ositol glycan anchor biosynthesis class K precursor [Homo sapiens]  
ed zinc finger protein isoform 1 [Homo sapiens]  
genetic protein 4 preproprotein [Homo sapiens]  
easing hormone precursor [Homo sapiens]  
itaining protein X-linked 2 [Homo sapiens]  
pendent domain containing 2 isoform 1 [Homo sapiens]  
roteinase 25 preproprotein [Homo sapiens]  
roteinase 25 preproprotein [Homo sapiens]  
quence binding factor 1 isoform 1 [Homo sapiens]  
amily 30 (zinc transporter) member 10 [Homo sapiens]  
protein 45A [Homo sapiens]  
preproprotein [Homo sapiens]  
nd testis expressed 3 [Homo sapiens]  
in 4 precursor [Homo sapiens]  
amine (serotonin) receptor 1F [Homo sapiens]  
main containing 2 [Homo sapiens]  
main containing 2 [Homo sapiens]  
main containing 2 [Homo sapiens]  
arly transcript 1L [Homo sapiens]  
e and metalloprotease (reprolysin type) with thrombospondin type 1 motif 15 preproprotein [Homo sapiens]  
e and metalloprotease (reprolysin type) with thrombospondin type 1 motif 15 preproprotein [Homo sapiens]  
ptor-like 1 [Homo sapiens]  
r RAS oncogene family [Homo sapiens]  
r of E1A-stimulated genes [Homo sapiens]  
r of E1A-stimulated genes [Homo sapiens]  
rsor [Homo sapiens]



io sapiens]  
ence similarity 82 member A2 [Homo sapiens]  
ence similarity 82 member A2 [Homo sapiens]  
:inal peptide isoform 1 preproprotein [Homo sapie ns]  
e precursor [Homo sapiens]  
family 39 member 7 [Homo sapiens]  
lrome 1 protein precursor [Homo sapiens]  
gamma subfamily C 3 isoform 1 precursor [Homo sap iens]  
sporting lysosomal accessory protein 1 precursor [Homo sapiens]  
5 isoform a [Homo sapiens]  
vertase subtilisin/kexin type 2 [Homo sapiens]  
vertase subtilisin/kexin type 2 [Homo sapiens]  
vertase subtilisin/kexin type 2 [Homo sapiens]  
r sequence similarity 38 member A [Homo sapiens]  
r sequence similarity 38 member A [Homo sapiens]  
tyric acid (GABA) A receptor beta 3 isoform 1 precu rsor [ Homo sapiens]  
tyric acid (GABA) A receptor beta 3 isoform 1 precu rsor [ Homo sapiens]  
:ransforming gene 1 protein-interacting protein p recurs or [Homo sapiens]  
o sapiens]  
r S [Homo sapiens]  
0 family 4 subfamily F polypeptide 8 [Homo sapie ns]  
family 39 (zinc transporter) member 6 isoform 1 [Homo sapiens]  
brane protein 72 [Homo sapiens]  
al cell-specific molecule 1 isoform b precursor [Ho mo sap iens]  
no sapiens]  
no sapiens]  
no sapiens]  
no sapiens]  
lpha class 2B member 2 [Homo sapiens]  
retic protein 1 isoform 2 precursor [Homo sapiens]  
nponent 1 q subcomponent A chain precursor [Homo s apiens ]  
ntiation factor 1 [Homo sapiens]  
re protein 145 [Homo sapiens]  
LAG seven-pass G-type receptor 3 [Homo sapiens]  
LAG seven-pass G-type receptor 3 [Homo sapiens]  
e 1 preproprotein [Homo sapiens]  
e 1 preproprotein [Homo sapiens]  
e 1 preproprotein [Homo sapiens]  
l-derived dendrite regulator [Homo sapiens]  
ollagen precursor [Homo sapiens]  
l protein 30kDa [Homo sapiens]

l protein 30kDa [Homo sapiens]  
l protein 30kDa [Homo sapiens]  
50 family 26 subfamily C polypeptide 1 [Homo sapiens]  
urite outgrowth associated isoform 2 [Homo sapiens ]  
:omponent 8 gamma polypeptide [Homo sapiens]  
g lectin serine protease 2 isoform 1 precursor [Homo sapiens]  
n lambda-like polypeptide 1 isoform b precursor [Homo sapiens]  
n lambda-like polypeptide 1 isoform a precursor [Homo sapiens]  
n lambda-like polypeptide 1 isoform a precursor [Homo sapiens]  
e 1 isoform 2 precursor [Homo sapiens]  
lC-type containing 21 [Homo sapiens]  
ning growth factor beta binding protein 1 isoform LTBP- 1L [Homo sapiens]  
ning growth factor beta binding protein 1 isoform LTBP- 1L [Homo sapiens]  
no sapiens]  
lomo sapiens]  
Homo sapiens]  
Homo sapiens]  
ceptor 3 [Homo sapiens]  
ceptor 3 [Homo sapiens]  
2R3 [Homo sapiens]  
sapiens]  
10kDa-like isoform 1 [Homo sapiens]  
receptor [Homo sapiens]  
receptor [Homo sapiens]  
1 activity of bc1 complex like precursor [Homo sapiens]  
rotein beta 7 25kDa [Homo sapiens]  
or [Homo sapiens]  
metallo-endorpeptidase [Homo sapiens]  
G seven-pass G-type receptor 1 [Homo sapiens]  
G seven-pass G-type receptor 1 [Homo sapiens]  
G seven-pass G-type receptor 1 [Homo sapiens]  
extracellular matrix protein 2 precursor [Homo sapiens]  
extracellular matrix protein 2 precursor [Homo sapiens]  
extracellular matrix protein 2 precursor [Homo sapiens]  
family 5 (inositol transporters) member 3 [Homo sapiens]  
family 5 (inositol transporters) member 3 [Homo sapiens]  
or isoform Long precursor [Homo sapiens]  
e 2 preproprotein [Homo sapiens]  
e 2 preproprotein [Homo sapiens]  
[Homo sapiens]  
Homo sapiens]

Homo sapiens]  
Homo sapiens]  
factor RNA polymerase 1-like [Homo sapiens]  
ceptor family 51 subfamily A member 4 [Homo sapiens]  
ergic receptor [Homo sapiens]  
ng protein 1 precursor [Homo sapiens]  
ng protein 1 precursor [Homo sapiens]  
ptor class F member 2 isoform 1 [Homo sapiens]  
ein 43 [Homo sapiens]  
ein 43 [Homo sapiens]  
sin 124 [Homo sapiens]  
lesterol reductase precursor [Homo sapiens]  
polyposis coli down-regulated 1 [Homo sapiens]  
nodular calcium binding 2 [Homo sapiens]  
nponent 8 beta polypeptide preproprotein [Homo sapiens]  
nponent 8 beta polypeptide preproprotein [Homo sapiens]  
nponent 8 beta polypeptide preproprotein [Homo sapiens]  
[Homo sapiens]  
beta 16 precursor [Homo sapiens]  
ne phosphatase receptor type G precursor [Homo sapiens]  
like domain containing 1 [Homo sapiens]  
sterase 40 [Homo sapiens]  
iel subfamily K member 5 [Homo sapiens]  
↓ 1 isoform 1 precursor [Homo sapiens]  
etase long-chain family member 6 isoform a [Homo sapiens]  
itiation factor 7 preproprotein [Homo sapiens]  
itiation factor 7 preproprotein [Homo sapiens]  
protein [Homo sapiens]  
nain containing 47 [Homo sapiens]  
roprotein [Homo sapiens]  
roprotein [Homo sapiens]  
amily 24 member 5 [Homo sapiens]  
g protein [Homo sapiens]  
eta 14 precursor [Homo sapiens]





















































































































































































































































































































































































































































































































































































































































































































































































































































































































































































































































Homo sapiens]  
Homo sapiens]
